# Supplementary material
Source: Research Square preprint supplement (doi:10.21203/rs.3.rs-8976053/v1)
Supplement: Supplementary file 1 [file 0bcb6ce48b39a5cae40ce804.xlsx]

## Sheet: Sheet1
gene	logFC	AveExpr	t	P.Value	adj.P.Val	B
MAP4K2	-0.283312	3.12477	-5.25094	9.46588e-07	0.0237944	4.5125
CBX8	-0.181218	1.27678	-3.95936	0.000146588	0.745084	0.558092
KIR2DL4	-0.133275	1.61684	-3.88947	0.000188032	0.745084	0.363507
ODF3	-0.144395	1.26583	-3.85037	0.000215873	0.745084	0.255672
LOC202781	-0.172615	1.61652	-3.8366	0.00022659	0.745084	0.217842
KCNIP3	0.160046	1.39275	3.83409	0.000228596	0.745084	0.210964
TMEM25	-0.146268	1.76566	-3.77765	0.000278435	0.745084	0.0570706
NTM-IT1	-0.26359	1.94695	-3.67392	0.000398179	0.745084	-0.221703
CAMK2B	-0.171067	1.37465	-3.6683	0.000405897	0.745084	-0.23665
LIPE	-0.139363	1.63357	-3.63926	0.000448094	0.745084	-0.313632
MYOM1	-0.168416	1.51984	-3.63584	0.000453337	0.745084	-0.322682
WNT1	-0.185215	1.66426	-3.62847	0.000464817	0.745084	-0.34214
SGK494	0.118711	1.53047	3.59304	0.000523947	0.745084	-0.435269
TRBV7-4	-0.148236	0.955691	-3.56628	0.000573272	0.745084	-0.505198
PVRIG	-0.24173	2.30934	-3.53863	0.000628811	0.745084	-0.577031
CYP27C1	-0.110746	1.07684	-3.5297	0.000647814	0.745084	-0.600151
ADAMTS10	-0.182622	1.73997	-3.51122	0.000688873	0.745084	-0.647856
MIR3908	-0.147411	0.627864	-3.49055	0.000737704	0.745084	-0.700999
FLJ30375	-0.161373	1.20247	-3.49052	0.000737781	0.745084	-0.701079
AGPHD1	-0.105839	1.05217	-3.48059	0.000762391	0.745084	-0.726533
XKRX	-0.126507	1.39452	-3.46137	0.000812224	0.745084	-0.775631
GNAZ	-0.244961	2.46113	-3.45755	0.000822483	0.745084	-0.785361
CD320	-0.16502	1.54913	-3.44106	0.000868229	0.745084	-0.827313
MIR4673	-0.409048	4.12123	-3.43452	0.000887022	0.745084	-0.843905
CCDC157	-0.131096	1.25462	-3.43069	0.000898216	0.745084	-0.853621
PLXDC1	-0.178607	1.95679	-3.42862	0.000904304	0.745084	-0.858855
MGARP	-0.137506	1.21487	-3.42775	0.000906889	0.745084	-0.861065
C9orf141	-0.171488	1.92222	-3.42518	0.000914515	0.745084	-0.867552
LOC401127	-0.216439	1.30741	-3.41886	0.000933592	0.745084	-0.883543
DRD3	-0.127041	1.21038	-3.41354	0.000949938	0.745084	-0.896985
PAX4	-0.140945	1.23799	-3.40577	0.000974265	0.745084	-0.916565
MAZ	-0.227584	3.06745	-3.40527	0.00097586	0.745084	-0.917831
PIP5K1A	-0.169314	1.50791	-3.39922	0.000995247	0.745084	-0.933061
HS3ST1	-0.142521	1.57085	-3.39537	0.00100779	0.745084	-0.942756
ADAMTS8	-0.141066	1.6872	-3.38159	0.00105382	0.754536	-0.977322
NKAIN4	-0.134303	1.24717	-3.36624	0.00110749	0.754536	-1.01575
LOC284926	-0.151346	1.17502	-3.34559	0.00118369	0.754536	-1.0672
MGST3	0.153223	1.3888	3.34181	0.00119818	0.754536	-1.0766
MTNR1B	-0.144835	1.35602	-3.33575	0.00122174	0.754536	-1.09166
PAPPA-AS1	-0.0833744	1.04678	-3.33555	0.00122252	0.754536	-1.09215
C11orf86	-0.154108	1.46591	-3.33084	0.00124115	0.754536	-1.10383
DGKQ	-0.174549	2.74753	-3.31029	0.00132549	0.754536	-1.15462
SMG5	0.260354	3.07312	3.30547	0.00134606	0.754536	-1.16652
LTK	-0.111211	1.4261	-3.30262	0.00135836	0.754536	-1.17354
MIR432	-0.134029	0.908422	-3.29843	0.00137661	0.754536	-1.18384
EPHB6	-0.145821	1.66818	-3.29748	0.00138078	0.754536	-1.18618
BAG3	-0.120732	1.39172	-3.28352	0.00144352	0.772037	-1.22048
TRABD2B	-0.168216	1.7393	-3.27565	0.00148002	0.773039	-1.23975
FBXO45	0.151094	1.55464	3.2645	0.00153324	0.773039	-1.26699
APOA4	-0.133585	1.62721	-3.26207	0.00154506	0.773039	-1.27292
HDAC11-AS1	-0.151731	1.16487	-3.2426	0.00164304	0.773039	-1.32032
SDPR	-0.354093	4.32086	-3.23412	0.00168745	0.773039	-1.34088
TSPYL5	-0.176267	1.53546	-3.23046	0.00170702	0.773039	-1.34976
FAM198A	-0.0973702	1.13506	-3.23045	0.00170704	0.773039	-1.34977
LOC550113	-0.111554	1.1936	-3.22833	0.00171845	0.773039	-1.35491
HOXD8	-0.172256	1.25	-3.21965	0.0017659	0.773039	-1.37589
LMNB2	-0.142135	1.59839	-3.21641	0.00178394	0.773039	-1.38372
SLC46A2	0.225479	2.53173	3.20808	0.00183111	0.773039	-1.40381
TPRN	-0.128928	1.12794	-3.20754	0.00183418	0.773039	-1.4051
KIRREL3-AS2	-0.0923069	1.01439	-3.20555	0.00184564	0.773039	-1.4099
MIR3649	0.108121	0.713346	3.18564	0.00196393	0.773039	-1.45771
CT62	-0.119239	1.2549	-3.17779	0.0020125	0.773039	-1.4765
BRSK1	-0.135174	1.35655	-3.17665	0.00201962	0.773039	-1.47922
C20orf141	-0.182514	1.5655	-3.16753	0.00207759	0.773039	-1.50099
LOC100506844	-0.112203	1.14707	-3.16171	0.00211544	0.773039	-1.51487
WNT10B	-0.132843	1.52922	-3.16125	0.00211843	0.773039	-1.51595
ZNF891	-0.140975	1.64926	-3.15572	0.00215506	0.773039	-1.52913
DMWD	-0.136574	1.74617	-3.14901	0.00220024	0.773039	-1.54508
TMEM176A	-0.236768	2.11201	-3.14873	0.00220214	0.773039	-1.54574
RN5S505	-0.144137	0.885113	-3.1472	0.00221256	0.773039	-1.54937
ZNF566	0.116075	1.19071	3.14162	0.00225101	0.773039	-1.56261
RN5S93	-0.359921	3.39842	-3.13451	0.00230086	0.773039	-1.57944
LIMCH1	-0.0834975	1.12762	-3.13112	0.00232504	0.773039	-1.58746
NDUFB1	0.200921	2.81077	3.12763	0.00235014	0.773039	-1.59571
LOC401093	-0.156151	1.95002	-3.12749	0.00235112	0.773039	-1.59603
FOXD2	-0.135838	1.37966	-3.12577	0.00236359	0.773039	-1.60009
CACNB2	-0.0992811	0.968698	-3.10166	0.002545	0.773039	-1.65685
NDUFV2	0.188439	2.256	3.09161	0.00262432	0.773039	-1.68039
RNU7-81P	0.125187	0.922189	3.08842	0.00264995	0.773039	-1.68785
LOC100507508	-0.147046	1.39571	-3.08772	0.00265561	0.773039	-1.68948
RN5S282	-0.274619	1.68321	-3.08772	0.00265565	0.773039	-1.6895
GCHFR	-0.162139	1.80293	-3.08654	0.00266525	0.773039	-1.69226
TMIGD2	-0.159391	1.8271	-3.08637	0.00266664	0.773039	-1.69266
BHLHA9	-0.120989	1.10616	-3.08212	0.00270134	0.773039	-1.70258
DISP2	-0.128928	1.37435	-3.07991	0.00271961	0.773039	-1.70775
SDS	-0.131261	1.48196	-3.07585	0.00275336	0.773039	-1.7172
A4GNT	-0.0820603	0.864532	-3.07424	0.00276691	0.773039	-1.72096
LOC100505949	-0.180947	2.22084	-3.07389	0.00276985	0.773039	-1.72178
ALDOC	-0.141925	1.9198	-3.07093	0.00279489	0.773039	-1.72867
DHRS3	-0.166139	2.10906	-3.06125	0.00287819	0.773039	-1.75118
CAMKV	-0.0933807	1.51696	-3.05909	0.00289714	0.773039	-1.75621
SH2D7	-0.12036	1.08466	-3.05477	0.00293529	0.773039	-1.76623
GCNT3	-0.100743	1.19867	-3.05312	0.00295001	0.773039	-1.77006
LOC100294307	-0.14835	1.66229	-3.05265	0.0029542	0.773039	-1.77115
D4S234E	-0.100799	1.46485	-3.04793	0.00299664	0.773039	-1.78207
PC	-0.115366	1.39949	-3.04547	0.00301903	0.773039	-1.78777
GUSBP1	0.207689	1.43415	3.04107	0.00305941	0.773039	-1.79794
FAM110B	-0.123926	1.34306	-3.03525	0.00311359	0.773039	-1.81138
SLC8A3	-0.133937	1.18335	-3.01972	0.00326247	0.773039	-1.84712
TMEM8C	-0.147642	1.37617	-3.01657	0.00329348	0.773039	-1.85435
NLN	0.120758	1.31987	3.01644	0.00329476	0.773039	-1.85465
ZNF32	-0.199029	1.31229	-3.01362	0.00332281	0.773039	-1.86113
C17orf58	-0.123288	1.02376	-3.0102	0.00335707	0.773039	-1.86898
NRN1	-0.140331	1.14237	-3.00846	0.00337457	0.773039	-1.87295
GPR42	-0.160648	1.04699	-3.00691	0.00339036	0.773039	-1.87652
PF4	-0.30344	3.04056	-3.00477	0.00341213	0.773039	-1.88141
NXT1	-0.159617	1.58004	-2.99518	0.00351141	0.773039	-1.90333
LOC254312	-0.0906105	0.838464	-2.9944	0.00351961	0.773039	-1.90512
RNU1-17P	-0.0942183	0.769904	-2.99361	0.00352785	0.773039	-1.9069
LOC154449	-0.170771	2.0189	-2.99216	0.00354316	0.773039	-1.91021
CRYGD	-0.0953704	1.25588	-2.99047	0.00356115	0.773039	-1.91408
FAM201A	-0.156191	1.96803	-2.98651	0.00360348	0.773039	-1.92311
SEPT5-GP1BB	-0.300824	3.04285	-2.97635	0.00371413	0.773039	-1.94621
PDX1-AS1	-0.08748	0.948822	-2.9762	0.00371581	0.773039	-1.94655
STEAP1B	-0.101598	1.07601	-2.9746	0.00373346	0.773039	-1.95017
TSC22D3	-0.139039	3.31075	-2.97365	0.00374402	0.773039	-1.95233
SBSN	-0.144499	1.45123	-2.97171	0.00376571	0.773039	-1.95674
LOC150197	-0.202256	1.66634	-2.97107	0.00377286	0.773039	-1.95819
PKN3	-0.121694	1.43536	-2.97086	0.00377523	0.773039	-1.95867
OR10P1	-0.134702	1.20939	-2.97048	0.00377955	0.773039	-1.95954
CDCA8	-0.112104	1.17962	-2.96687	0.00382025	0.773039	-1.96772
FAM167B	-0.121267	1.48822	-2.96608	0.00382918	0.773039	-1.9695
LOC338579	0.113409	0.833927	2.96532	0.00383789	0.773039	-1.97123
ZNF71	-0.194146	1.55205	-2.96387	0.0038544	0.773039	-1.97451
NUBP2	-0.152724	1.89448	-2.96086	0.00388901	0.773039	-1.98133
MBD3L4	-0.104809	1.14127	-2.95838	0.00391765	0.773039	-1.98693
HOXA-AS2	-0.0983048	1.10893	-2.9583	0.00391863	0.773039	-1.98712
RN5S156	0.157638	1.5314	2.95677	0.00393639	0.773039	-1.99057
SLC35G1	-0.0957049	1.72596	-2.94864	0.00403227	0.782115	-2.00893
OGFOD2	-0.164399	1.91353	-2.94533	0.00407178	0.782115	-2.01637
JARID2-AS1	-0.133281	1.0799	-2.94499	0.00407594	0.782115	-2.01715
LOC100131510	-0.0840124	1.40915	-2.9377	0.00416459	0.785279	-2.03355
TMEM91	-0.171105	2.66827	-2.93724	0.00417019	0.785279	-2.03458
LOC100505554	-0.143386	2.89615	-2.93595	0.00418616	0.785279	-2.03749
MIR92B	-0.322702	2.31523	-2.9295	0.0042664	0.79073	-2.05196
C14orf80	-0.124503	1.66359	-2.92618	0.00430829	0.79073	-2.05941
TEX35	-0.0849334	1.40325	-2.92437	0.00433126	0.79073	-2.06346
DGCR9	-0.128034	1.13692	-2.9236	0.00434104	0.79073	-2.06518
SPATA8	-0.0951384	0.97405	-2.91331	0.00447416	0.802323	-2.08819
PDHA2	-0.0847679	0.978301	-2.91162	0.00449643	0.802323	-2.09197
ATP6V1B1	-0.151836	1.24788	-2.90919	0.00452853	0.802323	-2.09738
TMPRSS11D	-0.0844365	1.0514	-2.9085	0.00453767	0.802323	-2.09892
SLC22A23	-0.157279	1.88992	-2.90242	0.00461911	0.802323	-2.11246
MIR4263	0.120393	0.951022	2.89887	0.00466735	0.802323	-2.12037
RTKN	-0.0950447	1.35163	-2.89827	0.00467551	0.802323	-2.1217
SPTBN2	-0.113868	1.09841	-2.89739	0.00468759	0.802323	-2.12366
RPP40	0.0914662	1.01651	2.89707	0.00469195	0.802323	-2.12437
LIPC	-0.0980502	1.08316	-2.89398	0.00473452	0.803039	-2.13124
C9orf50	-0.115047	1.48808	-2.89214	0.00476003	0.803039	-2.13533
CCNF	-0.101978	1.29456	-2.8855	0.00485295	0.806501	-2.15004
C22orf39	-0.165607	1.96228	-2.87635	0.00498392	0.806501	-2.17029
PANX2	-0.235417	2.71301	-2.87543	0.00499722	0.806501	-2.17232
UPK3A	-0.136507	1.21272	-2.87224	0.00504382	0.806501	-2.17938
C10orf108	-0.108356	1.27487	-2.86733	0.00511613	0.806501	-2.19019
TRBV6-4	-0.216654	1.28065	-2.86608	0.00513473	0.806501	-2.19295
FOXI3	-0.14566	1.25063	-2.85805	0.00525559	0.806501	-2.21063
GDF1	-0.146753	1.51702	-2.85585	0.00528913	0.806501	-2.21546
SEC14L3	-0.117373	1.24876	-2.84961	0.00538546	0.806501	-2.22917
LRIT1	-0.114574	1.22496	-2.84915	0.00539265	0.806501	-2.23018
PRPS1L1	-0.118581	1.31325	-2.84724	0.00542234	0.806501	-2.23435
RNU7-88P	0.1344	0.978626	2.84563	0.00544775	0.806501	-2.2379
TCEANC	-0.130328	1.69144	-2.8437	0.00547814	0.806501	-2.24213
LOC100499227	-0.110567	1.07684	-2.84263	0.00549508	0.806501	-2.24447
HDGFRP2	-0.161062	2.63394	-2.83726	0.00558068	0.806501	-2.2562
SNORD114-25	0.105598	0.646669	2.83657	0.00559188	0.806501	-2.25773
MIR4295	0.389371	3.14194	2.82985	0.00570089	0.806501	-2.27238
MIR4646	-0.242558	1.76523	-2.8293	0.00570997	0.806501	-2.27358
MIR622	-0.111862	1.10615	-2.82826	0.00572707	0.806501	-2.27585
METTL18	0.110613	1.09483	2.82739	0.00574134	0.806501	-2.27774
GPR85	-0.0699367	0.946164	-2.82648	0.00575646	0.806501	-2.27973
OSGIN1	-0.133881	1.78974	-2.82364	0.00580356	0.806501	-2.28591
LDLRAD2	-0.151445	1.23361	-2.82241	0.00582413	0.806501	-2.2886
ANKDD1A	-0.125554	1.8923	-2.82178	0.00583457	0.806501	-2.28996
SPIRE2	-0.109665	1.41055	-2.81966	0.00587028	0.806501	-2.29458
AMD1	-0.128758	6.41911	-2.81756	0.00590571	0.806501	-2.29915
LMTK3	-0.114432	1.55617	-2.81141	0.00601069	0.806501	-2.3125
SOX1	0.100378	1.29664	2.80774	0.00607396	0.806501	-2.32044
TMEM120A	-0.242513	3.38669	-2.80541	0.00611464	0.806501	-2.3255
FRMD4B	0.115409	1.37418	2.8053	0.00611658	0.806501	-2.32574
UQCRBP1	0.164976	1.48906	2.80524	0.00611759	0.806501	-2.32587
FLJ32255	-0.215527	3.96948	-2.80485	0.0061245	0.806501	-2.32672
C1orf170	-0.150285	1.86797	-2.80469	0.00612721	0.806501	-2.32706
CBX4	-0.153519	2.80739	-2.80306	0.00615583	0.806501	-2.33059
C10orf2	-0.0979848	1.42841	-2.80133	0.00618624	0.806501	-2.33432
KRTAP20-4	-0.104423	1.0139	-2.79961	0.00621679	0.806501	-2.33805
RN5S463	-0.188539	1.37635	-2.79937	0.00622093	0.806501	-2.33856
OR9Q2	-0.0884054	1.1583	-2.7989	0.00622939	0.806501	-2.33959
LURAP1L	-0.11531	1.14044	-2.79743	0.00625547	0.806501	-2.34275
CYP19A1	-0.0660272	1.02587	-2.79613	0.00627881	0.806501	-2.34557
PKMYT1	-0.13273	1.31634	-2.79561	0.00628809	0.806501	-2.34669
C21orf67	-0.126	1.60093	-2.79519	0.0062956	0.806501	-2.3476
ZNF135	-0.143527	1.4299	-2.79474	0.00630366	0.806501	-2.34857
AATK-AS1	-0.101764	1.19912	-2.7938	0.00632055	0.806501	-2.35059
TACC2	-0.106683	1.47678	-2.79296	0.00633585	0.806501	-2.35242
C5orf34	-0.0747945	0.918384	-2.78952	0.0063982	0.806501	-2.35984
LRRC55	-0.102626	1.22384	-2.78707	0.00644297	0.806501	-2.36512
OR4M1	-0.0646841	0.818238	-2.78424	0.00649502	0.806501	-2.37121
RN5-8S2	-0.307305	1.96275	-2.78145	0.00654658	0.806501	-2.37719
ZNF681	-0.187403	1.44491	-2.78094	0.00655611	0.806501	-2.3783
LOC100506983	-0.131336	1.3531	-2.77839	0.00660377	0.806501	-2.38378
IL29	0.093734	1.10715	2.77641	0.00664104	0.806501	-2.38804
MIR204	-0.079652	0.796091	-2.77469	0.0066736	0.806501	-2.39174
TBC1D29	-0.162101	1.46131	-2.77463	0.00667456	0.806501	-2.39185
RN5S448	-0.180507	1.33268	-2.77256	0.00671395	0.806501	-2.3963
MCF2L2	0.0856964	1.07449	2.77204	0.0067238	0.806501	-2.39741
ITGBL1	-0.0757947	1.18416	-2.77058	0.00675181	0.806501	-2.40055
GPR162	-0.152059	1.68128	-2.76722	0.00681634	0.806501	-2.40775
SENP8	-0.124782	1.20308	-2.76624	0.00683514	0.806501	-2.40983
TOP1P2	-0.0728186	0.786289	-2.76564	0.00684674	0.806501	-2.41111
ELAVL3	-0.135647	1.12893	-2.76329	0.00689246	0.806501	-2.41615
LOC100507367	-0.133109	1.60412	-2.7619	0.00691963	0.806501	-2.41912
CST2	-0.25747	2.83199	-2.75982	0.00696054	0.806501	-2.42358
LOC644936	0.168327	1.31873	2.75695	0.00701713	0.806501	-2.4297
HLA-F	0.12828	6.14169	2.75572	0.00704144	0.806501	-2.43231
SEMA3G	-0.112038	1.56013	-2.7524	0.00710775	0.806501	-2.4394
LOC100129215	-0.125327	1.5413	-2.75182	0.0071194	0.806501	-2.44064
KRTAP8-1	-0.0910851	0.868567	-2.74716	0.00721354	0.806501	-2.45056
C3orf33	-0.0736625	0.798348	-2.74615	0.00723414	0.806501	-2.45272
LSM4	-0.116888	3.79121	-2.74466	0.0072646	0.806501	-2.45589
BRMS1	-0.152148	2.32503	-2.74052	0.00734961	0.806501	-2.46468
MTSS1L	-0.113324	1.13556	-2.73984	0.0073638	0.806501	-2.46614
LOC100129534	-0.128467	1.65089	-2.73759	0.00741056	0.806501	-2.47092
SFT2D3	-0.156053	2.25677	-2.7362	0.00743948	0.806501	-2.47386
STAC2	-0.127013	1.52648	-2.73618	0.00743996	0.806501	-2.47391
CHCHD8	-0.145975	2.65841	-2.73246	0.00751796	0.806501	-2.48178
BTN1A1	-0.0828414	1.0572	-2.73218	0.00752392	0.806501	-2.48238
P2RY12	-0.247808	2.20384	-2.73101	0.00754866	0.806501	-2.48486
NT5M	-0.265996	2.07721	-2.73071	0.00755495	0.806501	-2.48549
LOC100652919	-0.088785	0.796746	-2.73033	0.00756299	0.806501	-2.48629
POTEG	-0.0880663	0.820242	-2.72946	0.00758163	0.806501	-2.48815
TMEM203	-0.152013	1.64233	-2.72816	0.00760919	0.806501	-2.49089
FGF20	-0.111128	1.07614	-2.72739	0.00762579	0.806501	-2.49253
FAT2	-0.0825314	1.06219	-2.72727	0.00762828	0.806501	-2.49278
MMP1	-0.0939147	0.918086	-2.72342	0.00771103	0.806501	-2.50092
EMR1	0.402975	3.37918	2.72231	0.00773497	0.806501	-2.50326
MCOLN2	0.171482	1.5625	2.72088	0.007766	0.806501	-2.50628
CD300E	0.160159	3.2863	2.72073	0.00776931	0.806501	-2.5066
PUS3	0.0954683	1.06624	2.71953	0.00779539	0.806501	-2.50913
NOC3L	0.183008	2.06571	2.71944	0.00779733	0.806501	-2.50932
CX3CL1	-0.159038	2.39265	-2.71911	0.00780468	0.806501	-2.51003
NOL3	-0.140842	1.74336	-2.7174	0.00784192	0.806501	-2.51362
CLMN	0.160462	2.79594	2.71667	0.00785804	0.806501	-2.51517
ARHGAP5-AS1	-0.111015	1.62198	-2.71659	0.00785972	0.806501	-2.51533
THPO	-0.116376	1.50073	-2.71532	0.00788783	0.806501	-2.51802
TRAV1-2	-0.365605	2.99138	-2.71318	0.00793503	0.806501	-2.52252
MRPL20	-0.197294	2.51154	-2.71225	0.0079556	0.806501	-2.52448
BSPRY	-0.12298	1.57301	-2.70977	0.00801097	0.806501	-2.52971
SLC15A5	-0.0611125	0.843894	-2.70793	0.00805223	0.806501	-2.53358
RHOBTB1	-0.130109	1.35172	-2.70785	0.00805401	0.806501	-2.53375
NFIB	-0.0876267	1.20764	-2.70646	0.00808529	0.806501	-2.53667
LILRB4	0.185195	1.99897	2.70494	0.00811951	0.806501	-2.53985
MEOX1	-0.157663	1.64355	-2.70316	0.00815991	0.806501	-2.5436
RABEP2	0.138079	1.52807	2.70305	0.00816246	0.806501	-2.54383
ZNF688	-0.141153	1.70511	-2.70115	0.00820572	0.806501	-2.54782
HPDL	-0.120773	1.73391	-2.69672	0.00830751	0.806501	-2.55711
ANKRD20A12P	-0.140405	1.06879	-2.69452	0.00835853	0.806501	-2.56172
HOXB3	-0.105942	1.2035	-2.69259	0.00840347	0.806501	-2.56576
RN5-8S4	-0.174197	1.81556	-2.69183	0.00842134	0.806501	-2.56736
MBD3L2	-0.083121	0.903836	-2.69097	0.00844154	0.806501	-2.56916
MMD	-0.394923	4.8649	-2.69009	0.00846204	0.806501	-2.57099
LOC155060	-0.0852375	1.38488	-2.689	0.00848781	0.806501	-2.57328
MSRB3	-0.110503	1.34975	-2.6854	0.00857306	0.806501	-2.58081
SCIMP	0.251434	4.59126	2.68518	0.00857822	0.806501	-2.58126
OR6N1	-0.117278	1.09345	-2.68328	0.00862343	0.806501	-2.58522
INSL5	-0.0806949	0.915344	-2.68048	0.00869076	0.806501	-2.59108
ZNF213	-0.167907	2.30532	-2.67846	0.00873957	0.806501	-2.59529
ZFPL1	-0.136997	1.39301	-2.67507	0.00882181	0.806501	-2.60234
OTUB1	-0.124905	2.79391	-2.67477	0.00882918	0.806501	-2.60297
CPNE9	-0.13596	1.61872	-2.67267	0.00888064	0.806501	-2.60734
PPIL1	-0.164272	1.97341	-2.67037	0.00893715	0.806501	-2.61212
BHLHE23	-0.195545	2.12089	-2.66951	0.00895848	0.806501	-2.61391
MS4A14	0.381079	3.17352	2.66795	0.00899717	0.806501	-2.61715
DPH2	-0.0967061	1.39583	-2.66522	0.00906518	0.806501	-2.62282
F2	-0.0965598	1.1349	-2.66392	0.00909771	0.806501	-2.62551
RN5S200	-0.135446	0.962557	-2.66324	0.00911479	0.806501	-2.62692
WBSCR27	-0.121897	1.41686	-2.66322	0.00911542	0.806501	-2.62697
PDX1	-0.138411	1.34623	-2.65856	0.00923327	0.806501	-2.63663
IGHV4-39	0.119449	0.896757	2.65711	0.00927018	0.806501	-2.63963
BDH1	-0.115454	1.5826	-2.65691	0.00927521	0.806501	-2.64004
DMRTB1	-0.134571	1.4825	-2.65537	0.00931472	0.806501	-2.64324
SRD5A1	0.193904	1.67998	2.65425	0.00934338	0.806501	-2.64555
COL18A1	-0.187465	2.70109	-2.65366	0.00935863	0.806501	-2.64677
SERPIND1	-0.0933039	1.15843	-2.65333	0.00936725	0.806501	-2.64747
GNMT	-0.133341	1.45113	-2.64807	0.00950356	0.806501	-2.65832
GUCY2F	0.080204	1.07298	2.64802	0.00950481	0.806501	-2.65842
ZBTB42	-0.101431	1.12975	-2.64566	0.00956683	0.806501	-2.66331
TSC22D1-AS1	-0.139103	1.9689	-2.64445	0.00959851	0.806501	-2.66579
SCAMP4	-0.123736	1.57836	-2.64442	0.0095993	0.806501	-2.66586
FAM210A	0.120526	1.53451	2.64225	0.00965676	0.806501	-2.67034
CUL7	0.135281	1.52363	2.64217	0.00965883	0.806501	-2.6705
TGM1	-0.100482	1.5159	-2.6366	0.00980735	0.806501	-2.68196
LCA10	-0.127735	1.56126	-2.63616	0.00981912	0.806501	-2.68286
LOC653061	-0.213125	1.7234	-2.63517	0.0098458	0.806501	-2.6849
ZNF286A	-0.101651	1.35011	-2.63494	0.00985195	0.806501	-2.68537
VAT1L	-0.0888718	1.23534	-2.63475	0.00985713	0.806501	-2.68576
LOC100506980	-0.0538362	0.782481	-2.63358	0.0098887	0.806501	-2.68816
CHST2	-0.113631	1.22265	-2.63089	0.00996187	0.806501	-2.6937
HIST1H1C	-0.207631	2.00596	-2.63082	0.00996375	0.806501	-2.69384
CHST6	-0.0799351	1.38211	-2.62281	0.0101842	0.806501	-2.71026
CHDH	-0.122126	1.34819	-2.62048	0.0102493	0.806501	-2.71505
LOC399744	0.151822	1.23814	2.61837	0.0103084	0.806501	-2.71936
KIAA0284	-0.102887	1.5407	-2.6183	0.0103103	0.806501	-2.7195
C19orf68	-0.101082	1.12522	-2.61685	0.0103512	0.806501	-2.72247
LOC100289627	-0.237561	4.27558	-2.61647	0.0103618	0.806501	-2.72323
SLC25A18	-0.0954681	1.35577	-2.61641	0.0103637	0.806501	-2.72337
FAH	-0.124593	1.33525	-2.61637	0.0103646	0.806501	-2.72344
METTL17	0.124647	1.87015	2.61242	0.0104769	0.806501	-2.73152
PROC	-0.101306	1.27483	-2.61216	0.0104843	0.806501	-2.73205
UHRF1BP1	0.187509	1.75153	2.6119	0.0104917	0.806501	-2.73258
RIMS3	-0.142186	1.73505	-2.61143	0.010505	0.806501	-2.73353
LACC1	0.123256	1.9576	2.6104	0.0105347	0.806501	-2.73564
LOXL1-AS1	-0.128156	2.05689	-2.6087	0.0105835	0.806501	-2.73911
PARVA	-0.0635029	0.97763	-2.60724	0.0106256	0.806501	-2.74208
DPP6	-0.0679965	1.00497	-2.60702	0.0106317	0.806501	-2.74252
MBD3L3	-0.091418	1.33281	-2.606	0.0106614	0.806501	-2.74461
MIR3186	-0.143953	1.59887	-2.60561	0.0106726	0.806501	-2.74539
ISM2	-0.121346	1.99281	-2.60314	0.0107445	0.806501	-2.75043
RN5S515	-0.090325	1.22888	-2.60277	0.0107553	0.806501	-2.75118
MIR219-2	-0.109992	1.15884	-2.60233	0.0107681	0.806501	-2.75207
PDE5A	-0.236214	2.24318	-2.60102	0.0108065	0.806501	-2.75474
TRAV25	-0.186611	1.31748	-2.59999	0.0108367	0.806501	-2.75683
KRTAP10-3	-0.145995	1.21953	-2.59974	0.0108442	0.806501	-2.75734
MIR190B	-0.0735568	0.632059	-2.59905	0.0108645	0.806501	-2.75875
WDR86	-0.0954578	1.62176	-2.59759	0.0109074	0.806501	-2.7617
OR7E14P	-0.125079	1.26188	-2.59501	0.010984	0.806501	-2.76695
TGFB1I1	-0.184089	1.57684	-2.59467	0.0109943	0.806501	-2.76765
RNU7-40P	0.276599	1.96766	2.59458	0.0109968	0.806501	-2.76781
CACTIN	-0.140595	1.93787	-2.59392	0.0110165	0.806501	-2.76916
ZNF367	-0.121308	1.73017	-2.5935	0.0110292	0.806501	-2.77002
CD300LG	-0.121358	1.83546	-2.59174	0.0110817	0.806501	-2.77358
KRBA2	-0.0881136	1.21074	-2.59129	0.0110952	0.806501	-2.77449
CD209	-0.133303	1.27749	-2.58985	0.0111386	0.806501	-2.77741
GTSE1	-0.0969369	1.064	-2.58903	0.0111634	0.806501	-2.77908
ETV2	-0.102731	1.08718	-2.58849	0.0111796	0.806501	-2.78016
HES7	-0.164212	1.42505	-2.58803	0.0111935	0.806501	-2.7811
ZNF85	-0.142348	1.95475	-2.58774	0.0112023	0.806501	-2.78168
RMI2	-0.103257	1.15834	-2.58671	0.0112337	0.806501	-2.78378
DIAPH3	-0.0807994	0.888489	-2.58663	0.0112359	0.806501	-2.78393
B3GALT6	-0.191697	2.18147	-2.58592	0.0112576	0.806501	-2.78537
CARTPT	-0.0672006	0.928283	-2.58456	0.0112991	0.806501	-2.78813
RAB6B	-0.153086	1.58183	-2.58203	0.0113765	0.806501	-2.79323
MFAP3L	-0.104377	1.48785	-2.58163	0.011389	0.806501	-2.79405
STRAP	0.172077	4.46723	2.58101	0.0114079	0.806501	-2.7953
DHFRL1	-0.132622	1.50044	-2.58068	0.0114182	0.806501	-2.79597
HIST1H2AI	-0.438713	2.29256	-2.58011	0.0114358	0.806501	-2.79712
KCNMB2	-0.0633572	1.36314	-2.579	0.0114701	0.806501	-2.79936
RN5S205	-0.117757	1.03044	-2.57661	0.0115443	0.806501	-2.80419
RNU5A-5P	0.132034	1.09094	2.57589	0.0115665	0.806501	-2.80563
UBL7	-0.196836	5.10163	-2.57576	0.0115706	0.806501	-2.8059
OR2A1	-0.359257	2.24765	-2.5752	0.0115881	0.806501	-2.80702
RNF157-AS1	-0.0951578	1.24391	-2.57492	0.011597	0.806501	-2.8076
PRDM8	-0.13912	2.0805	-2.57351	0.0116412	0.806501	-2.81045
NXN	-0.0925143	1.26029	-2.57185	0.0116933	0.806501	-2.81379
RN5S183	-0.13147	0.84543	-2.57161	0.0117008	0.806501	-2.81426
MIR1288	0.077235	0.911843	2.57143	0.0117063	0.806501	-2.81462
LOC100129027	-0.146454	3.40922	-2.57101	0.0117199	0.806501	-2.81548
TJP3	-0.108908	1.45679	-2.57078	0.011727	0.806501	-2.81594
EPHX4	-0.0785306	1.20509	-2.56834	0.0118043	0.806501	-2.82085
FKBP15	0.220792	5.38192	2.56821	0.0118083	0.806501	-2.82111
RN5S218	-0.201557	2.32308	-2.56768	0.0118254	0.806501	-2.82218
RNU7-65P	0.10858	0.843626	2.56762	0.0118273	0.806501	-2.82231
UNCX	-0.125218	1.50998	-2.56606	0.011877	0.806501	-2.82544
MIR4788	-0.0980571	1.12905	-2.56549	0.0118951	0.806501	-2.82658
TJP1	-0.0750658	1.06297	-2.56439	0.0119303	0.806501	-2.82879
FAM58A	-0.152104	1.8049	-2.56436	0.0119311	0.806501	-2.82884
SLC25A2	-0.13956	1.35547	-2.56334	0.0119639	0.806501	-2.8309
ATXN7L3B	-0.145018	3.98648	-2.56304	0.0119736	0.806501	-2.8315
SLC35F3	-0.0950415	1.51248	-2.56274	0.0119834	0.806501	-2.83211
KIAA1875	-0.107364	1.43367	-2.56269	0.011985	0.806501	-2.83221
NPPB	-0.0989691	1.19688	-2.56167	0.0120178	0.806501	-2.83426
ST3GAL5	0.137197	1.57223	2.56137	0.0120275	0.806501	-2.83486
FOXC2	-0.120103	1.3233	-2.56123	0.012032	0.806501	-2.83513
LOC100505719	-0.0842038	1.13876	-2.56057	0.0120534	0.806501	-2.83647
AAMP	0.102994	1.77695	2.55994	0.0120737	0.806501	-2.83772
LOC100507609	-0.0700187	0.837781	-2.55912	0.0121003	0.806501	-2.83937
CRIPAK	0.143837	1.43249	2.55881	0.0121104	0.806501	-2.83999
FAM170B	-0.111997	1.96922	-2.55863	0.0121162	0.806501	-2.84035
ENTPD8	-0.127507	1.45806	-2.55692	0.012172	0.806501	-2.84378
CST11	-0.0604468	0.830168	-2.55663	0.0121814	0.806501	-2.84436
ZNF835	-0.084864	1.31976	-2.55631	0.012192	0.806501	-2.84501
MIR149	-0.221737	1.85245	-2.55511	0.0122314	0.80698	-2.84742
TUBA4B	-0.171054	1.68291	-2.5519	0.0123371	0.809283	-2.85385
CRISP1	-0.0711805	0.857934	-2.55013	0.0123956	0.809283	-2.85738
CTF1	-0.139785	1.8527	-2.55001	0.0123996	0.809283	-2.85762
ADAM28	0.281356	2.80804	2.54853	0.0124489	0.809283	-2.86059
GPANK1	-0.104074	2.0349	-2.54821	0.0124593	0.809283	-2.86121
MFNG	-0.135457	3.44708	-2.54821	0.0124594	0.809283	-2.86122
C12orf43	-0.104201	1.75403	-2.54594	0.0125355	0.81033	-2.86576
C15orf52	-0.101257	1.35722	-2.5458	0.01254	0.81033	-2.86603
STK32B	-0.111468	0.915509	-2.54249	0.0126514	0.814559	-2.87264
CITED4	-0.20863	1.63801	-2.54193	0.0126703	0.814559	-2.87375
FER1L4	-0.0974617	1.31696	-2.5407	0.0127121	0.815166	-2.87621
LINC00574	-0.0915257	0.991741	-2.53924	0.0127619	0.815251	-2.87913
SMAD9-AS1	0.0798502	0.946942	2.53846	0.0127884	0.815251	-2.88068
PIPOX	0.084297	1.10724	2.5378	0.0128108	0.815251	-2.88198
RN5S423	-0.136901	1.08521	-2.53665	0.0128503	0.815353	-2.88428
MPEG1	0.193891	8.55779	2.53533	0.0128958	0.815353	-2.88692
RN5S301	0.0657378	0.690753	2.53492	0.0129097	0.815353	-2.88772
DDX11L2	-0.184343	1.63827	-2.5319	0.0130141	0.819891	-2.89374
AGSK1	-0.109177	2.41507	-2.52809	0.0131468	0.82618	-2.9013
SEMA6D	-0.0712625	0.996729	-2.52436	0.0132778	0.829561	-2.9087
PRRG2	-0.123818	1.19008	-2.52429	0.0132804	0.829561	-2.90884
HYI	-0.114502	1.48381	-2.52374	0.0132996	0.829561	-2.90992
LOC728339	0.0994172	1.45939	2.52075	0.0134058	0.834111	-2.91585
HOXC11	-0.0884847	1.02584	-2.51621	0.0135683	0.842141	-2.92483
FLJ25694	-0.0567	0.833914	-2.51502	0.0136113	0.842726	-2.92719
FLJ39534	0.103619	1.0883	2.51146	0.0137405	0.846434	-2.93423
FLJ46320	-0.0848507	0.95562	-2.51098	0.0137581	0.846434	-2.93518
PODXL2	-0.132193	1.83651	-2.50881	0.0138372	0.846434	-2.93946
CTAGE7P	0.102378	0.897276	2.50832	0.0138552	0.846434	-2.94042
FSCN1	-0.108404	1.30588	-2.50795	0.0138689	0.846434	-2.94116
TEAD4	-0.106845	1.51339	-2.50632	0.0139288	0.846434	-2.94437
RN7SKP8	-0.116277	1.04168	-2.504	0.0140145	0.846434	-2.94894
TOP1MT	-0.0742662	1.19688	-2.50381	0.0140214	0.846434	-2.9493
SPDEF	-0.117541	1.89329	-2.50311	0.0140474	0.846434	-2.95069
KIAA1210	0.062363	1.03979	2.50287	0.0140563	0.846434	-2.95116
AKT1	-0.148494	2.65718	-2.50265	0.0140645	0.846434	-2.95159
MIR4725	-0.239594	1.35721	-2.5015	0.0141072	0.846434	-2.95385
FLJ40852	-0.152096	1.58781	-2.50033	0.0141509	0.846434	-2.95615
SLC17A7	-0.108063	1.30061	-2.49995	0.0141652	0.846434	-2.9569
CALML3	-0.109461	1.48658	-2.49963	0.0141774	0.846434	-2.95754
LOC100128531	-0.164746	1.72207	-2.49876	0.0142099	0.846434	-2.95925
TRIP13	-0.0810468	1.01331	-2.49654	0.0142935	0.847741	-2.96361
LINC00115	0.126033	1.02678	2.4959	0.0143176	0.847741	-2.96486
BEX1	0.100256	1.01207	2.49549	0.0143331	0.847741	-2.96567
AP1M2	-0.0966955	0.954979	-2.49211	0.0144612	0.84789	-2.97229
MATN4	-0.112561	1.58972	-2.49199	0.014466	0.84789	-2.97254
SOX4	-0.139069	2.28325	-2.49198	0.0144662	0.84789	-2.97255
RN5S101	-0.0972034	0.876814	-2.49139	0.0144888	0.84789	-2.97371
KCNN3	-0.0999054	1.20595	-2.48969	0.0145539	0.84789	-2.97705
CDH23-AS1	0.0796752	0.949916	2.48935	0.0145669	0.84789	-2.97771
LRRN2	-0.0963268	1.39581	-2.48923	0.0145717	0.84789	-2.97796
RN5S241	0.133647	1.00234	2.48655	0.0146745	0.851816	-2.98319
C15orf26	-0.150572	1.37989	-2.48572	0.0147069	0.851816	-2.98483
IL27	-0.122825	1.688	-2.48458	0.0147508	0.852394	-2.98704
MIR455	-0.0865857	1.08362	-2.48218	0.0148442	0.855825	-2.99174
TWF2	-0.150016	6.06897	-2.47953	0.0149479	0.85778	-2.99691
RAI1-AS1	-0.0725561	1.24486	-2.4789	0.014973	0.85778	-2.99816
MUC12	-0.0747744	1.24088	-2.4787	0.0149805	0.85778	-2.99853
IRF9	0.140641	3.24189	2.47585	0.0150931	0.862261	-3.0041
FN3K	-0.127999	1.49468	-2.47492	0.01513	0.862411	-3.00591
DCTN1	0.156724	3.28134	2.47358	0.0151834	0.862458	-3.00853
SIX2	-0.116434	1.78973	-2.47318	0.0151995	0.862458	-3.00932
MIR548O2	0.303059	1.7252	2.47217	0.0152397	0.862795	-3.01128
SF3A2	-0.115291	3.62118	-2.46892	0.01537	0.867227	-3.01761
MECR	0.0796058	1.21323	2.4685	0.015387	0.867227	-3.01843
NCR2	-0.118992	1.77194	-2.46359	0.0155858	0.87264	-3.02797
TPGS1	-0.154444	1.46764	-2.46294	0.0156122	0.87264	-3.02922
PEX12	-0.116541	1.61133	-2.46288	0.0156147	0.87264	-3.02934
MITD1	0.186627	2.3261	2.4627	0.0156219	0.87264	-3.02968
LRRN4CL	-0.0961356	1.2633	-2.46022	0.0157235	0.87458	-3.0345
KRTAP2-2	-0.0882826	0.937062	-2.46001	0.0157322	0.87458	-3.03491
PRICKLE2-AS2	0.074361	0.932972	2.4585	0.0157946	0.87458	-3.03784
PPT2-EGFL8	-0.0747769	1.41426	-2.4584	0.0157987	0.87458	-3.03804
MRPS23	0.119917	1.57294	2.45763	0.0158306	0.87458	-3.03953
CSAG1	0.114741	1.49352	2.45375	0.0159914	0.879875	-3.04704
LINC00519	-0.114029	1.42408	-2.45226	0.0160539	0.879875	-3.04993
MRGPRX1	-0.0907223	1.05448	-2.4522	0.0160564	0.879875	-3.05005
PAX7	-0.121636	1.47869	-2.4515	0.0160857	0.879875	-3.0514
AKR7L	-0.141396	1.36893	-2.44999	0.0161492	0.879875	-3.05432
DYRK2	-0.142808	2.40623	-2.44979	0.0161574	0.879875	-3.0547
LCTL	-0.077246	0.968986	-2.44946	0.0161715	0.879875	-3.05534
SHOC2	-0.0821266	7.68338	-2.44781	0.0162411	0.880459	-3.05853
TAGLN3	-0.0839895	1.36009	-2.44666	0.0162898	0.880459	-3.06075
LOC283140	0.138378	1.59796	2.44598	0.0163184	0.880459	-3.06205
PTPRU	-0.0790892	1.35844	-2.44589	0.0163223	0.880459	-3.06223
GSTA2	0.10084	0.946411	2.44258	0.0164636	0.883272	-3.06862
LOC100287144	-0.106841	1.12795	-2.44221	0.0164792	0.883272	-3.06932
LOC100653167	-0.225799	4.06328	-2.44153	0.0165083	0.883272	-3.07063
TMPRSS11E	-0.0697981	0.990997	-2.44138	0.016515	0.883272	-3.07093
SNORD115-14	-0.0494747	0.486583	-2.44019	0.0165663	0.884133	-3.07323
RIMBP3B	-0.179943	1.45103	-2.43919	0.0166093	0.88455	-3.07515
ASTN2	-0.0710689	1.37616	-2.43785	0.0166673	0.885761	-3.07774
HOXA-AS3	-0.102376	1.16698	-2.43631	0.0167339	0.885984	-3.0807
AXDND1	-0.063778	1.09949	-2.43612	0.0167419	0.885984	-3.08105
LIMS1	-0.188387	2.18178	-2.4312	0.0169571	0.889428	-3.09051
GPAT2	-0.0857075	1.44917	-2.43044	0.0169907	0.889428	-3.09198
PCCB	0.118227	1.90861	2.43034	0.016995	0.889428	-3.09217
KIAA1598	0.265088	2.59052	2.43034	0.0169951	0.889428	-3.09217
LOC399829	-0.0988136	1.28844	-2.42988	0.0170153	0.889428	-3.09305
BMS1	0.211564	2.5307	2.42863	0.0170705	0.889428	-3.09545
INSM1	-0.136212	1.52656	-2.4286	0.0170716	0.889428	-3.0955
LOC201617	0.110968	1.2001	2.42807	0.017095	0.889428	-3.09651
LIME1	-0.221423	2.12916	-2.42672	0.0171551	0.889428	-3.09911
MIR720	0.138657	1.82289	2.42584	0.0171939	0.889428	-3.10079
TNFRSF11B	-0.0948634	1.16146	-2.42579	0.0171962	0.889428	-3.10089
TEX34	-0.0738336	0.933853	-2.42416	0.0172689	0.889568	-3.10401
PPP2R2C	-0.0759888	1.04344	-2.42369	0.0172901	0.889568	-3.10492
LOC100505746	-0.190128	2.20923	-2.42186	0.0173722	0.889568	-3.10842
FAM182A	-0.0991759	0.96594	-2.42053	0.0174319	0.889568	-3.11096
LOC100128239	-0.101898	1.65013	-2.42034	0.0174406	0.889568	-3.11133
FAM90A20P	-0.131861	1.7515	-2.41973	0.017468	0.889568	-3.1125
LOC400084	-0.0804349	1.04302	-2.41924	0.0174902	0.889568	-3.11343
ABCC5-AS1	-0.0845148	0.919864	-2.41866	0.0175161	0.889568	-3.11453
MBD3L5	-0.0978606	1.48721	-2.41863	0.0175175	0.889568	-3.11459
SLC25A29	-0.165909	2.2038	-2.41679	0.0176012	0.8902	-3.11812
RASA4	0.137687	3.28541	2.41612	0.0176316	0.8902	-3.1194
LOC100506733	0.088031	1.19794	2.415	0.0176824	0.8902	-3.12152
MIR1302-7	-0.105989	0.90996	-2.4119	0.0178245	0.8902	-3.12745
LOC100506891	-0.0836109	0.890346	-2.41158	0.0178389	0.8902	-3.12804
ZNF493	0.345227	3.35903	2.41065	0.0178817	0.8902	-3.12982
ABCC6P1	-0.146529	0.994827	-2.40991	0.0179161	0.8902	-3.13124
MASTL	0.202636	2.68773	2.40884	0.0179657	0.8902	-3.13328
ZC3H12B	-0.0846005	1.23329	-2.40837	0.0179874	0.8902	-3.13418
CIITA	0.246211	4.68287	2.40671	0.0180641	0.8902	-3.13732
ZNF500	0.14669	2.59453	2.40548	0.0181217	0.8902	-3.13968
DKKL1	-0.11873	1.68023	-2.4048	0.0181532	0.8902	-3.14096
C12orf44	0.0950291	1.56165	2.40474	0.0181563	0.8902	-3.14109
C9orf92	0.0531986	0.745655	2.40463	0.018161	0.8902	-3.14128
COL5A2	-0.0783362	1.06812	-2.40445	0.0181698	0.8902	-3.14164
HIST1H2BK	-0.19208	4.3674	-2.40444	0.0181701	0.8902	-3.14165
SLC35E2	-0.162757	2.65455	-2.40438	0.0181729	0.8902	-3.14176
ESAM	-0.151889	1.61544	-2.40378	0.018201	0.8902	-3.14291
CSDA	0.1231	1.96	2.40374	0.0182028	0.8902	-3.14298
FAM90A27P	-0.139415	1.64706	-2.40141	0.0183123	0.893608	-3.14742
MAN1C1	-0.134053	2.06691	-2.39823	0.0184626	0.893608	-3.15346
SNORD32A	-0.121309	1.30968	-2.39798	0.0184742	0.893608	-3.15392
SEC31A	0.125064	2.54829	2.39728	0.0185072	0.893608	-3.15524
MYOD1	-0.0951063	1.06181	-2.39691	0.0185252	0.893608	-3.15596
TRBV3-1	-0.325165	2.34337	-2.3934	0.0186929	0.893608	-3.16261
MEIS3P1	-0.119538	1.00427	-2.3933	0.0186976	0.893608	-3.1628
TNS1	0.117499	1.48971	2.39323	0.0187009	0.893608	-3.16293
KIAA1841	0.113798	1.78547	2.39311	0.0187067	0.893608	-3.16316
C6orf225	-0.084034	1.05378	-2.39258	0.0187318	0.893608	-3.16415
ZNF837	-0.158981	2.09131	-2.39111	0.0188028	0.893608	-3.16695
GPR15	0.291608	2.23528	2.39108	0.0188041	0.893608	-3.167
LOC284513	-0.118083	1.65923	-2.38977	0.0188674	0.893608	-3.16948
ERCC6L	-0.0678214	0.96611	-2.38971	0.0188703	0.893608	-3.16959
LOC100506305	-0.0777178	1.13058	-2.38917	0.0188964	0.893608	-3.17061
EXOSC6	-0.143794	3.72004	-2.38884	0.0189125	0.893608	-3.17124
MIR578	-0.0621365	0.782079	-2.38843	0.0189322	0.893608	-3.17201
HSPG2	-0.0539171	1.44642	-2.38793	0.0189566	0.893608	-3.17296
CD86	0.196662	4.8001	2.38792	0.018957	0.893608	-3.17298
TACSTD2	-0.0970528	1.05245	-2.38625	0.019038	0.893608	-3.17613
RN5S441	-0.208335	2.50525	-2.38608	0.0190466	0.893608	-3.17646
CASP16	-0.126526	1.623	-2.38577	0.0190618	0.893608	-3.17705
SP140	0.291332	3.85845	2.38471	0.0191135	0.893608	-3.17905
FAM41C	0.101873	1.66426	2.38385	0.0191555	0.893608	-3.18067
ATF1	-0.14705	4.01563	-2.38306	0.0191941	0.893608	-3.18215
COL1A2	-0.0652348	1.11927	-2.38227	0.019233	0.893608	-3.18365
NKAPL	-0.0876061	1.63318	-2.38145	0.0192732	0.893608	-3.18519
HSP90AA6P	-0.112693	1.05195	-2.38126	0.0192825	0.893608	-3.18555
PMP22	-0.119886	1.40421	-2.38073	0.0193087	0.893608	-3.18655
SOX9	-0.163421	1.69436	-2.38012	0.0193389	0.893608	-3.1877
HOXC9	-0.0909589	1.21069	-2.37821	0.0194336	0.896336	-3.19131
RN5S298	-0.142153	3.07939	-2.37613	0.0195371	0.896399	-3.19523
FGD2	0.214094	3.13065	2.37556	0.0195651	0.896399	-3.19628
ZNF793	-0.087332	1.06519	-2.37448	0.0196194	0.896399	-3.19833
FTCD-AS1	-0.147294	2.06456	-2.37162	0.0197629	0.896399	-3.2037
SKP1P2	0.103959	1.43411	2.37151	0.0197684	0.896399	-3.20391
NDUFB7	-0.179146	2.85725	-2.3713	0.0197787	0.896399	-3.20429
OR5AS1	-0.0863647	0.899038	-2.37111	0.0197884	0.896399	-3.20466
SLC7A4	-0.0811533	1.27916	-2.37075	0.0198069	0.896399	-3.20534
ARHGEF4	-0.0816224	1.15411	-2.36989	0.0198501	0.896399	-3.20695
MIR483	-0.220542	2.63695	-2.36906	0.0198922	0.896399	-3.20851
IGHA1	0.204923	2.64562	2.36903	0.0198939	0.896399	-3.20858
CACNA1G-AS1	-0.134607	1.84522	-2.36831	0.0199299	0.896399	-3.20991
MTCH2	0.195792	3.10241	2.36739	0.019977	0.896399	-3.21165
LINC00511	-0.0977116	1.37039	-2.36722	0.0199854	0.896399	-3.21196
LINC00221	0.0703681	1.04212	2.36586	0.020055	0.896399	-3.21452
MZT2B	-0.168548	1.54469	-2.36463	0.0201176	0.896399	-3.21682
PHLDA2	-0.10757	1.22114	-2.36431	0.020134	0.896399	-3.21742
MIR1269B	-0.212376	1.93589	-2.36371	0.0201647	0.896399	-3.21854
SRGAP2	0.26638	3.85499	2.3631	0.0201962	0.896399	-3.2197
RNY1P2	-0.0683839	0.764831	-2.36176	0.0202649	0.896399	-3.2222
CACNG3	-0.101105	1.33903	-2.36136	0.0202857	0.896399	-3.22295
LOC100216001	-0.0752371	0.958347	-2.36086	0.0203115	0.896399	-3.22389
PCDHB12	0.143991	1.1107	2.3599	0.0203611	0.896399	-3.22569
ATP2B2-IT1	-0.0886782	1.15001	-2.35903	0.0204059	0.896399	-3.22731
LOC729348	-0.0732603	0.834965	-2.35852	0.0204326	0.896399	-3.22827
PPP1R3A	0.0667786	0.869498	2.35847	0.020435	0.896399	-3.22836
LOC401164	0.0617675	0.895589	2.35838	0.0204397	0.896399	-3.22852
SNAR-G2	-0.157531	1.63619	-2.35786	0.0204665	0.896399	-3.22949
CRIP2	-0.0924971	1.63159	-2.35614	0.0205562	0.896399	-3.23271
PUF60	-0.136395	2.41814	-2.35563	0.0205828	0.896399	-3.23366
FAM89A	-0.0878919	1.10624	-2.35548	0.0205908	0.896399	-3.23395
LRRN4	-0.0918315	1.36874	-2.35401	0.0206674	0.896399	-3.23669
DLX5	-0.0842073	1.25779	-2.35366	0.0206858	0.896399	-3.23734
DNM3OS	-0.0632389	1.33429	-2.35359	0.0206898	0.896399	-3.23748
RN5S181	-0.118474	1.0105	-2.35326	0.0207067	0.896399	-3.23809
CHODL	0.0658038	1.02181	2.35263	0.02074	0.896399	-3.23927
BCKDHA	-0.123871	2.93128	-2.35183	0.0207821	0.896399	-3.24076
KRT18P54	-0.240087	2.4553	-2.3502	0.0208679	0.896399	-3.2438
FBN2	0.0929365	1.32773	2.35005	0.0208757	0.896399	-3.24407
MIR1284	0.134765	1.2667	2.3493	0.0209156	0.896399	-3.24548
MIR485	-0.0622925	0.800266	-2.34916	0.0209229	0.896399	-3.24574
MAFG-AS1	-0.0922583	1.37231	-2.34709	0.0210327	0.896399	-3.24959
LIM2	-0.0880392	1.09236	-2.34658	0.0210602	0.896399	-3.25055
EMCN-IT3	0.0733709	0.768577	2.34654	0.0210623	0.896399	-3.25062
MIR558	0.097628	1.15809	2.34436	0.0211789	0.896399	-3.25469
LOC100505875	-0.0598891	0.742715	-2.34415	0.0211898	0.896399	-3.25507
PALM3	-0.0925496	1.30601	-2.34321	0.0212402	0.896399	-3.25681
SERPINB9	0.323764	3.67907	2.34305	0.0212487	0.896399	-3.25711
ALPI	-0.128152	1.19504	-2.34302	0.0212503	0.896399	-3.25716
FLVCR1-AS1	-0.118033	1.29072	-2.34204	0.0213033	0.896399	-3.259
MIR21	0.219768	6.17717	2.34176	0.0213185	0.896399	-3.25952
PYDC2	-0.0927899	0.967552	-2.34104	0.0213569	0.896399	-3.26084
USP29	-0.0871345	1.09612	-2.34064	0.0213786	0.896399	-3.26159
MIR1224	-0.240737	1.4657	-2.34052	0.0213851	0.896399	-3.26182
SMAD1	0.0734721	1.19096	2.34031	0.0213963	0.896399	-3.2622
GNG3	-0.111764	1.60534	-2.3392	0.0214563	0.896457	-3.26426
GPHA2	-0.106399	1.5222	-2.33897	0.021469	0.896457	-3.2647
FAM176A	-0.0969945	1.06109	-2.33396	0.0217422	0.897128	-3.27399
CPNE5	-0.0984882	1.49904	-2.33294	0.0217982	0.897128	-3.27589
CEBPA	-0.178821	3.08279	-2.33222	0.0218377	0.897128	-3.27722
COMTD1	-0.112074	1.62138	-2.33216	0.0218411	0.897128	-3.27733
IRF2BPL	-0.15933	3.25549	-2.33128	0.0218893	0.897128	-3.27895
LRRC7	0.076901	0.955035	2.33019	0.0219498	0.897128	-3.28098
TUBA3C	-0.163533	1.64907	-2.32906	0.0220121	0.897128	-3.28307
LOC100133985	-0.120618	1.64987	-2.32864	0.0220351	0.897128	-3.28383
MIR523	-0.0688115	0.696441	-2.32703	0.0221248	0.897128	-3.28682
IGKV3D-15	0.15672	2.72918	2.3249	0.0222438	0.897128	-3.29076
C9orf118	0.0827828	0.831829	2.32464	0.0222578	0.897128	-3.29122
IRF8	0.190463	4.43118	2.32393	0.0222981	0.897128	-3.29255
VRTN	-0.108075	1.09211	-2.32307	0.0223459	0.897128	-3.29413
TMEM55A	-0.171677	5.98453	-2.32303	0.0223481	0.897128	-3.2942
CHRND	-0.0996488	1.40199	-2.32298	0.0223513	0.897128	-3.2943
IL6	0.0866933	1.1706	2.32172	0.022422	0.897128	-3.29662
ST18	-0.0564967	1.10626	-2.32111	0.0224566	0.897128	-3.29776
MIR197	-0.173542	1.90668	-2.32064	0.0224832	0.897128	-3.29862
IGLC2	0.551064	4.74158	2.32042	0.0224952	0.897128	-3.29902
POU5F1B	-0.082461	0.988076	-2.31872	0.0225916	0.897128	-3.30216
LOC100216479	-0.0989151	1.05712	-2.31849	0.0226048	0.897128	-3.30259
THAP7	-0.107206	1.93192	-2.31726	0.0226747	0.897128	-3.30485
LOC286254	-0.12273	1.65599	-2.31662	0.022711	0.897128	-3.30603
CBY1	-0.0687159	1.74481	-2.3161	0.0227403	0.897128	-3.30698
CHPF	0.0963511	1.45257	2.314	0.0228606	0.897128	-3.31085
MDFI	-0.134017	1.64982	-2.31356	0.0228857	0.897128	-3.31165
DISC1-IT1	0.179616	1.61266	2.31302	0.0229168	0.897128	-3.31265
MTUS2-AS1	-0.136666	1.88692	-2.31285	0.0229264	0.897128	-3.31296
HBCBP	-0.101	1.43748	-2.31193	0.0229794	0.897128	-3.31465
EPHA2	-0.0718566	1.1872	-2.3104	0.0230675	0.897128	-3.31746
FKBP10	-0.0794162	1.29736	-2.31001	0.0230901	0.897128	-3.31818
MIR4797	-0.0826188	0.683711	-2.30993	0.0230945	0.897128	-3.31832
LOC149837	0.0942682	1.49015	2.30808	0.0232017	0.897128	-3.32172
CLIP3	-0.107004	1.41604	-2.30767	0.0232255	0.897128	-3.32247
GSTM2	-0.153943	1.75679	-2.30599	0.0233234	0.897128	-3.32556
TCF7L1	-0.102514	1.34369	-2.30578	0.0233354	0.897128	-3.32594
SEPT10	0.0681718	1.01635	2.30554	0.0233496	0.897128	-3.32638
LOC100505774	-0.0838072	1.26579	-2.30408	0.0234352	0.897128	-3.32906
HYAL1	-0.112821	1.35917	-2.30406	0.0234362	0.897128	-3.32909
TERC	-0.374676	3.74719	-2.30404	0.0234372	0.897128	-3.32913
FAM120C	-0.0747594	1.52005	-2.30383	0.0234497	0.897128	-3.32952
ABHD8	-0.146147	2.53755	-2.30366	0.0234596	0.897128	-3.32983
MTERFD1	-0.110382	1.68747	-2.30361	0.0234626	0.897128	-3.32992
TUBA8	-0.110146	1.29733	-2.30151	0.0235859	0.897128	-3.33377
UGT8	0.0894471	1.50461	2.30116	0.0236063	0.897128	-3.3344
MRRFP1	0.129356	1.34016	2.30112	0.0236088	0.897128	-3.33448
AFG3L1P	0.114816	1.8252	2.30005	0.0236721	0.897128	-3.33644
LOC388942	-0.0877963	1.10619	-2.29934	0.0237143	0.897128	-3.33775
RN5S482	-0.136864	1.21821	-2.29915	0.0237253	0.897128	-3.33809
APOE	-0.0863811	1.25765	-2.29892	0.0237392	0.897128	-3.33852
ANKDD1B	-0.0840845	1.30732	-2.2989	0.0237398	0.897128	-3.33854
INGX	-0.139283	1.96822	-2.29871	0.0237512	0.897128	-3.33889
LOC400943	-0.103855	1.26839	-2.29826	0.0237779	0.897128	-3.33971
RN5S385	0.101721	1.0656	2.29789	0.0237998	0.897128	-3.34039
TESK1	-0.103994	2.62787	-2.29786	0.0238019	0.897128	-3.34045
DUSP8	-0.107916	1.29817	-2.29756	0.0238196	0.897128	-3.341
MYCT1	-0.105675	1.18705	-2.29727	0.0238369	0.897128	-3.34153
MBD1	0.157171	2.59647	2.29649	0.0238834	0.897128	-3.34296
OR2T8	0.0955832	0.732816	2.29641	0.023888	0.897128	-3.3431
KRT10	-0.0876561	0.89686	-2.29547	0.0239441	0.897128	-3.34482
LOC100507632	-0.0772331	1.06636	-2.29541	0.0239478	0.897128	-3.34493
OLFM2	-0.123682	1.34502	-2.29539	0.0239485	0.897128	-3.34495
SPTA1	0.156709	1.62442	2.29502	0.0239709	0.897128	-3.34564
TK2	-0.113623	2.41349	-2.29482	0.0239829	0.897128	-3.346
OR5T2	0.0710553	0.766027	2.29359	0.0240563	0.897128	-3.34824
GPR142	-0.110768	1.55197	-2.29189	0.0241586	0.897128	-3.35135
DNMT3L	-0.0721922	1.20217	-2.29145	0.0241852	0.897128	-3.35216
C7orf50	-0.0939278	1.57251	-2.29138	0.0241892	0.897128	-3.35228
MIR339	-0.22307	2.50854	-2.29129	0.0241945	0.897128	-3.35244
KIF2A	-0.15586	5.44166	-2.29125	0.0241969	0.897128	-3.35251
SMARCA5-AS1	-0.118346	1.38085	-2.29081	0.0242235	0.897128	-3.35332
NOP14-AS1	-0.111631	1.53095	-2.29072	0.0242287	0.897128	-3.35348
C20orf96	-0.0972521	1.00958	-2.28911	0.0243261	0.897128	-3.35641
BOK-AS1	-0.104776	1.65679	-2.28894	0.0243367	0.897128	-3.35673
RN5S400	0.0709939	0.772429	2.28891	0.0243383	0.897128	-3.35678
TRBV20OR9-2	-0.163306	2.02837	-2.28879	0.0243455	0.897128	-3.357
TBXA2R	-0.121133	1.80369	-2.2885	0.0243634	0.897128	-3.35754
RERG	0.0888453	0.982619	2.28841	0.0243685	0.897128	-3.35769
RNU7-49P	0.109748	0.859327	2.28763	0.024416	0.897128	-3.35912
MIR942	0.108789	1.22247	2.28753	0.024422	0.897128	-3.3593
NRARP	-0.0809534	1.00863	-2.28752	0.0244224	0.897128	-3.35931
FIBIN	-0.0942136	1.13805	-2.2875	0.0244237	0.897128	-3.35935
SARS2	-0.104065	1.59682	-2.28554	0.0245428	0.897128	-3.36291
DPP3	0.107428	1.35926	2.28515	0.0245666	0.897128	-3.36362
C2CD4D	-0.103197	1.33154	-2.28437	0.0246147	0.897128	-3.36505
NDST3	-0.0588352	0.816216	-2.28386	0.0246456	0.897128	-3.36597
ACTN1-AS1	-0.0884996	1.23186	-2.28379	0.02465	0.897128	-3.3661
CABP1	-0.0675408	1.12456	-2.28264	0.0247202	0.897128	-3.36819
FER1L5	0.0702855	1.25251	2.28194	0.0247634	0.897128	-3.36946
SEC14L5	-0.0923057	1.41998	-2.28107	0.0248169	0.897128	-3.37104
LOC645638	0.0664719	0.907626	2.28063	0.0248442	0.897128	-3.37185
TTPAL	-0.137537	2.92179	-2.28058	0.0248472	0.897128	-3.37193
DLC1	0.0778649	1.15251	2.27995	0.0248863	0.897128	-3.37309
H2AFB1	0.0639881	1.10992	2.27957	0.0249093	0.897128	-3.37376
C11orf40	-0.0914346	1.42851	-2.27888	0.0249525	0.897128	-3.37503
CBLN2	-0.0955475	1.23995	-2.27886	0.0249535	0.897128	-3.37506
AKR1A1	0.103676	1.38089	2.27839	0.0249823	0.897128	-3.3759
ICAM3	-0.160851	7.00559	-2.27797	0.0250084	0.897128	-3.37667
WNT10A	-0.116798	1.46693	-2.27684	0.0250786	0.897128	-3.37872
MSH3	0.212842	3.8431	2.27664	0.025091	0.897128	-3.37908
STEAP3	0.129545	1.8869	2.27633	0.0251102	0.897128	-3.37964
APOC3	-0.0988062	1.35474	-2.27558	0.0251572	0.897128	-3.38101
MATK	-0.159066	2.39252	-2.27524	0.0251785	0.897128	-3.38163
NAV3	-0.0882498	1.16299	-2.27494	0.0251968	0.897128	-3.38216
ZNF410	0.130711	1.80911	2.27278	0.0253323	0.900678	-3.38609
SERF2	-0.091416	1.56389	-2.27152	0.0254116	0.902208	-3.38837
CHAD	-0.10896	1.49117	-2.27046	0.0254779	0.902208	-3.39028
CYP2D6	-0.103128	1.7141	-2.27038	0.0254831	0.902208	-3.39043
PUS1	-0.112537	2.10427	-2.26893	0.0255743	0.904166	-3.39304
C1QL2	-0.102621	1.14678	-2.26785	0.0256427	0.905311	-3.39499
HSF1	-0.110474	2.68825	-2.26625	0.0257449	0.906317	-3.3979
LOC100506888	-0.155514	1.19866	-2.26575	0.0257765	0.906317	-3.3988
GLDN	-0.0895197	1.19363	-2.2657	0.0257794	0.906317	-3.39888
LAIR2	0.168948	1.01708	2.26375	0.0259039	0.908475	-3.4024
FAM127B	-0.189028	2.30538	-2.26361	0.025913	0.908475	-3.40266
C2orf40	-0.0711693	0.944732	-2.26238	0.0259917	0.90907	-3.40487
ALG3	-0.109724	2.29808	-2.26221	0.0260024	0.90907	-3.40517
DEFB126	0.0675017	0.87432	2.26056	0.0261088	0.909306	-3.40816
NAPRT1	-0.130449	1.86503	-2.2602	0.0261321	0.909306	-3.40881
TRAPPC1	-0.158204	5.36956	-2.25991	0.0261507	0.909306	-3.40933
VCX2	0.145688	3.1883	2.25986	0.0261538	0.909306	-3.40942
LOC284080	-0.0846675	1.24584	-2.25862	0.026234	0.909816	-3.41165
CCL20	0.0617561	0.977241	2.25755	0.0263035	0.909816	-3.41359
LDHA	0.0984694	1.93591	2.25714	0.02633	0.909816	-3.41432
SLC16A11	-0.0977581	1.38014	-2.25686	0.0263479	0.909816	-3.41482
DCUN1D2	0.119411	3.22653	2.25671	0.0263574	0.909816	-3.41508
ARX	-0.104834	2.15392	-2.25628	0.0263856	0.909816	-3.41587
CCDC69	0.173914	5.18855	2.25382	0.0265457	0.914081	-3.42028
HIST1H2AE	-0.177616	1.21262	-2.25305	0.0265962	0.914567	-3.42167
FAM184B	-0.0879171	1.44553	-2.25214	0.0266561	0.915154	-3.42331
BEND4	-0.106608	1.16647	-2.25131	0.0267104	0.915154	-3.4248
TRIM78P	0.163006	1.61194	2.25073	0.0267486	0.915154	-3.42584
RALGPS1	0.124506	1.9945	2.24965	0.0268194	0.915154	-3.42777
HIST1H2APS1	-0.124849	1.19177	-2.24759	0.0269559	0.915154	-3.43148
ARHGAP17	0.237903	3.93903	2.24695	0.0269985	0.915154	-3.43263
USH1G	-0.122138	1.59145	-2.24647	0.0270298	0.915154	-3.43348
OR51F1	-0.0731567	0.930812	-2.24496	0.0271304	0.915154	-3.43619
MTRNR2L7	-0.0679907	0.854905	-2.24335	0.0272377	0.915154	-3.43907
HIST1H2AC	-0.153904	7.10689	-2.24317	0.0272499	0.915154	-3.43939
CCRN4L	-0.128358	1.68104	-2.24291	0.0272672	0.915154	-3.43986
TMEM177	-0.0937791	1.294	-2.24268	0.0272827	0.915154	-3.44027
MYBBP1A	-0.109176	1.47728	-2.2412	0.0273821	0.915154	-3.44293
TNFRSF10A	0.116954	2.27163	2.24102	0.027394	0.915154	-3.44324
MKNK1-AS1	0.100265	1.22061	2.24084	0.027406	0.915154	-3.44356
LINC00162	-0.124144	1.38347	-2.24083	0.0274066	0.915154	-3.44358
C8orf17	0.100821	1.21422	2.24055	0.0274252	0.915154	-3.44407
TECTA	-0.0829756	1.14841	-2.23986	0.0274722	0.915154	-3.44532
MIR4757	-0.181774	1.63446	-2.23962	0.0274879	0.915154	-3.44574
APCDD1	-0.0874713	1.31107	-2.23844	0.0275675	0.915154	-3.44785
USP6NL	0.108802	2.11845	2.23701	0.0276646	0.915154	-3.45041
FAM197Y1	-0.131721	1.43398	-2.23625	0.027716	0.915154	-3.45176
FAM203A	-0.0806501	1.52546	-2.23583	0.0277445	0.915154	-3.45251
DPYSL2	0.173794	2.80522	2.23493	0.027806	0.915154	-3.45413
CES3	-0.0688372	1.04816	-2.23458	0.0278296	0.915154	-3.45475
TCP10	-0.123185	1.35264	-2.23428	0.0278497	0.915154	-3.45527
CADM3	-0.0914981	1.54533	-2.23394	0.0278729	0.915154	-3.45588
C12orf65	-0.119928	2.61467	-2.23381	0.0278818	0.915154	-3.45611
MAG	-0.0995893	1.24861	-2.23314	0.0279281	0.915154	-3.45732
LOC388242	-0.0987854	1.66656	-2.23132	0.028052	0.915154	-3.46055
ABHD16B	-0.122962	1.84444	-2.22966	0.0281664	0.915154	-3.46351
SEPT14	0.0750763	0.837501	2.22962	0.0281689	0.915154	-3.46358
TAS1R1	-0.0877032	1.25625	-2.22951	0.0281766	0.915154	-3.46378
PARM1	0.0954538	1.57892	2.22833	0.028258	0.915154	-3.46588
MIR507	-0.0741389	0.710836	-2.22778	0.0282958	0.915154	-3.46685
WNK2	-0.0816843	1.22763	-2.22703	0.0283476	0.915154	-3.46819
C4orf32	0.167901	2.04348	2.22633	0.0283964	0.915154	-3.46944
MIR4470	0.158263	1.65092	2.22629	0.0283988	0.915154	-3.4695
TYW1	0.109743	1.35061	2.22389	0.028566	0.915154	-3.47378
C5orf38	-0.106055	1.41523	-2.22293	0.028633	0.915154	-3.47548
ZCCHC3	-0.0949014	1.4148	-2.22275	0.0286456	0.915154	-3.4758
ORMDL2	-0.151939	3.16015	-2.22231	0.0286761	0.915154	-3.47658
ORM1	-0.229716	2.80287	-2.22231	0.0286763	0.915154	-3.47658
SCML2	-0.0582157	0.890944	-2.22146	0.0287357	0.915154	-3.47809
PP2D1	-0.0683528	0.889885	-2.22011	0.0288303	0.915154	-3.48048
CD8A	-0.187879	2.83251	-2.21986	0.0288481	0.915154	-3.48093
MIR4679-2	0.0990584	0.828042	2.21968	0.0288608	0.915154	-3.48125
CPVL	0.14277	2.78281	2.21934	0.0288844	0.915154	-3.48185
DOK6	-0.157432	1.66154	-2.2185	0.0289437	0.915154	-3.48334
FBXO48	-0.135099	2.67845	-2.21847	0.0289461	0.915154	-3.4834
MID1	-0.067195	0.979983	-2.21777	0.028995	0.915154	-3.48463
ZNF114	-0.107195	1.42461	-2.21631	0.0290982	0.915154	-3.48722
GTF3C6	-0.103755	1.38398	-2.2163	0.0290991	0.915154	-3.48724
LOC100505903	-0.0722699	0.956145	-2.21601	0.0291197	0.915154	-3.48776
TRBV5-4	-0.183183	1.61867	-2.21598	0.0291217	0.915154	-3.4878
RNU1-16P	0.206931	2.63655	2.21596	0.0291235	0.915154	-3.48785
CELA2A	-0.150998	2.23304	-2.21541	0.0291624	0.915154	-3.48882
SLC52A2	-0.11428	1.65919	-2.21472	0.0292115	0.915154	-3.49004
CSNK1A1P1	0.0949645	1.11417	2.21457	0.0292217	0.915154	-3.4903
RRN3P2	0.172209	2.42622	2.21447	0.0292289	0.915154	-3.49048
BPIFC	-0.0467149	1.02456	-2.214	0.0292626	0.915154	-3.49132
UBQLN2	-0.157967	5.15655	-2.21357	0.0292928	0.915154	-3.49207
SPINT2	-0.131105	2.57012	-2.21238	0.0293776	0.915154	-3.49417
MIR3934	0.208922	2.8686	2.21225	0.0293874	0.915154	-3.49441
ARL6IP4	-0.118209	3.26824	-2.20968	0.029571	0.915154	-3.49894
IGKV2D-29	0.0660753	0.792171	2.20923	0.0296039	0.915154	-3.49975
PFKFB1	-0.0902154	1.16956	-2.20787	0.0297012	0.915154	-3.50214
LOC728218	-0.0571448	1.13239	-2.20714	0.029754	0.915154	-3.50343
SNORA70F	0.0776568	0.756573	2.20695	0.0297678	0.915154	-3.50377
IGKV5-2	-0.116463	1.28004	-2.20606	0.029832	0.915154	-3.50534
IL11	-0.127276	1.89031	-2.20496	0.029912	0.915154	-3.50728
IL33	0.0625046	0.727339	2.20478	0.0299248	0.915154	-3.50759
FCGR1A	0.257936	6.35153	2.20445	0.0299492	0.915154	-3.50819
LPPR2	-0.174969	4.90414	-2.20434	0.0299569	0.915154	-3.50837
ZNF428	-0.0784473	1.14438	-2.20416	0.0299701	0.915154	-3.50869
KYNU	0.234615	2.74126	2.20385	0.0299923	0.915154	-3.50923
TECPR1	0.113985	2.33583	2.20329	0.0300332	0.915154	-3.51022
MIR1282	-0.352219	4.86905	-2.20323	0.0300374	0.915154	-3.51032
FAM203B	-0.0758858	1.54755	-2.20232	0.0301039	0.915154	-3.51193
WFIKKN2	-0.102749	1.42518	-2.20102	0.0301986	0.915154	-3.51421
RNASE11	0.0508377	0.870016	2.20059	0.0302301	0.915154	-3.51497
SFTPD	-0.11419	1.66572	-2.19908	0.0303411	0.915154	-3.51764
FAM35B	0.118045	1.10616	2.19899	0.0303479	0.915154	-3.5178
RN5S338	-0.175443	1.49524	-2.19888	0.0303557	0.915154	-3.51799
PHLDB1	-0.0622221	1.15723	-2.19885	0.0303578	0.915154	-3.51804
DNAJC11	0.132714	1.81055	2.19836	0.030394	0.915154	-3.5189
NR4A2	-0.103978	1.22398	-2.19747	0.0304594	0.915154	-3.52046
MIR182	-0.0663886	0.963751	-2.1971	0.0304872	0.915154	-3.52112
ZNF233	-0.0543401	0.755779	-2.19589	0.0305766	0.915154	-3.52325
TSR3	-0.147503	3.51595	-2.19582	0.0305815	0.915154	-3.52337
TMEM47	-0.0938174	1.11312	-2.19472	0.030663	0.915154	-3.5253
BAIAP3	-0.0989071	1.94543	-2.19351	0.0307529	0.915154	-3.52743
LOC100507377	-0.0574094	0.842568	-2.19254	0.0308245	0.915154	-3.52912
GUCY2EP	-0.0759836	1.77743	-2.19163	0.0308925	0.915154	-3.53072
TMEM196	-0.0696973	1.17346	-2.1916	0.030895	0.915154	-3.53078
GSX1	-0.0996426	1.31647	-2.19078	0.030956	0.915154	-3.53221
HSD17B11	-0.10757	8.07302	-2.19054	0.030974	0.915154	-3.53263
SPRR1A	-0.10588	1.02596	-2.18994	0.0310188	0.915154	-3.53368
AIFM3	-0.0933292	1.25886	-2.18984	0.0310264	0.915154	-3.53386
RAB27B	-0.291635	3.82845	-2.18955	0.0310483	0.915154	-3.53437
CGB1	-0.146399	1.51001	-2.18948	0.0310534	0.915154	-3.53449
GPS2	-0.16469	3.97666	-2.1893	0.0310673	0.915154	-3.53481
CBLN1	-0.0923457	1.34447	-2.18891	0.0310961	0.915154	-3.53549
IGKV1D-39	0.361878	5.25354	2.18873	0.0311094	0.915154	-3.5358
CD226	-0.197552	4.91989	-2.18873	0.0311094	0.915154	-3.5358
DAAM1	0.111268	1.60397	2.18831	0.0311414	0.915154	-3.53654
SEC24D	0.152149	3.8012	2.18758	0.0311964	0.915154	-3.53782
FAM228A	0.0925478	1.24398	2.18672	0.031261	0.915154	-3.53933
C20orf194	0.180096	2.39818	2.18612	0.0313065	0.915154	-3.54038
HIST1H4A	-0.116051	1.14741	-2.18604	0.0313125	0.915154	-3.54052
FAM220CP	-0.149462	2.7837	-2.18581	0.0313296	0.915154	-3.54092
MIR1269A	-0.169499	1.68788	-2.18513	0.0313812	0.915154	-3.54211
LOC254559	-0.065954	1.28862	-2.18395	0.0314704	0.915154	-3.54417
OR6C76	-0.0559253	0.776758	-2.1837	0.0314889	0.915154	-3.5446
LOC100505966	-0.071966	0.862522	-2.18275	0.0315618	0.915154	-3.54627
MIR518A2	0.131022	1.34872	2.18233	0.0315932	0.915154	-3.547
SYCN	-0.137544	1.71896	-2.18209	0.0316116	0.915154	-3.54742
RN5S122	-0.20142	2.22591	-2.18151	0.0316557	0.915154	-3.54843
UST	-0.139566	1.79508	-2.18128	0.0316733	0.915154	-3.54883
TMEM62	0.148045	2.88179	2.18024	0.0317527	0.915154	-3.55065
NME3	-0.124626	1.57795	-2.17961	0.0318007	0.915154	-3.55174
INS-IGF2	-0.0697573	1.24283	-2.17852	0.0318847	0.915154	-3.55366
CAT	0.210429	7.35541	2.17796	0.0319274	0.915154	-3.55463
H1FNT	-0.0618612	1.41933	-2.17759	0.0319556	0.915154	-3.55527
MIRLET7A1	-0.139317	1.45283	-2.17751	0.0319623	0.915154	-3.55542
PLCXD3	-0.0689018	1.16489	-2.17704	0.0319979	0.915154	-3.55623
TRMT2A	-0.122127	1.87829	-2.17698	0.0320031	0.915154	-3.55634
TTC6	-0.0422553	0.951567	-2.17615	0.0320666	0.915154	-3.55778
LINC00346	-0.0814879	1.24514	-2.17608	0.032072	0.915154	-3.5579
TAF6L	-0.0845529	1.55214	-2.17498	0.0321572	0.915154	-3.55983
MATN1-AS1	-0.0887213	1.28569	-2.17482	0.032169	0.915154	-3.56009
ATAD5	-0.157335	2.32599	-2.17458	0.0321878	0.915154	-3.56052
CMTM8	-0.104499	3.11314	-2.1741	0.032225	0.915154	-3.56135
ZNF17	0.11738	1.28613	2.17376	0.0322516	0.915154	-3.56195
KRBOX1	-0.0474579	0.979959	-2.17337	0.0322812	0.915154	-3.56262
DAND5	-0.1182	1.47494	-2.17144	0.0324315	0.915154	-3.56598
ADAMTS18	0.0764748	1.15211	2.17135	0.0324388	0.915154	-3.56615
MIR548I4	0.0585318	0.81785	2.17094	0.0324701	0.915154	-3.56685
LOC100499467	-0.0913188	1.29836	-2.17077	0.0324836	0.915154	-3.56715
CYB5R1	-0.117532	2.73911	-2.17076	0.0324845	0.915154	-3.56717
EPB41L1	-0.0776296	1.18818	-2.17059	0.0324978	0.915154	-3.56746
SLC25A15	-0.0760319	1.4052	-2.1705	0.0325045	0.915154	-3.56761
CCDC8	-0.0815151	1.4516	-2.17031	0.0325197	0.915154	-3.56795
SOD3	-0.092741	1.37675	-2.17022	0.0325267	0.915154	-3.56811
THBS1	-0.23022	2.7153	-2.16976	0.0325622	0.915154	-3.5689
TAS2R4	-0.148406	1.94085	-2.16797	0.0327023	0.915154	-3.57201
RESP18	-0.0726123	0.864848	-2.16694	0.032783	0.915154	-3.57379
INTU	-0.0579306	1.094	-2.16587	0.0328677	0.915154	-3.57566
MLLT10P1	-0.0706324	0.965912	-2.16562	0.0328876	0.915154	-3.5761
SHOX2	-0.0655673	0.966705	-2.16543	0.0329022	0.915154	-3.57642
PCDHB2	-0.0721381	0.968	-2.1653	0.0329121	0.915154	-3.57664
CYYR1	-0.0778051	1.42956	-2.16492	0.0329422	0.915154	-3.5773
GATA5	-0.0959645	1.59064	-2.16471	0.0329592	0.915154	-3.57768
ALDH3A2	0.128868	2.16532	2.1635	0.0330546	0.915154	-3.57977
PHRF1	0.120706	2.87553	2.16324	0.0330749	0.915154	-3.58021
SSPO	-0.0563116	1.67818	-2.16228	0.0331516	0.915154	-3.58189
APOF	-0.0861782	1.13171	-2.16155	0.033209	0.915154	-3.58314
IGF2-AS	-0.120447	1.60768	-2.16086	0.0332641	0.915154	-3.58434
SLC9A7	0.112332	2.07262	2.16063	0.0332825	0.915154	-3.58474
CALML6	-0.110274	1.82569	-2.16053	0.0332905	0.915154	-3.58492
ABCB5	-0.0482506	1.06227	-2.15984	0.0333452	0.915154	-3.58611
GPR62	-0.10174	1.48088	-2.15957	0.0333672	0.915154	-3.58658
UBTD1	-0.102285	2.35351	-2.15939	0.0333813	0.915154	-3.58689
LOC100506478	-0.0736607	0.965444	-2.15923	0.033394	0.915154	-3.58717
SLC6A5	-0.0565044	0.910104	-2.15838	0.0334617	0.915154	-3.58863
WWTR1-AS1	-0.0736959	1.10644	-2.1582	0.0334766	0.915154	-3.58895
VGLL2	-0.0860284	1.31908	-2.15784	0.0335056	0.915154	-3.58958
CDC42EP3	-0.100987	2.21839	-2.15736	0.0335438	0.915154	-3.59041
C17orf100	-0.137387	1.93329	-2.15709	0.0335652	0.915154	-3.59087
LINC00460	-0.0687147	1.0084	-2.15652	0.0336109	0.915154	-3.59185
HSD11B1L	-0.0909084	1.58726	-2.15568	0.0336783	0.915154	-3.5933
ZCCHC12	-0.127021	1.31967	-2.1551	0.0337256	0.915154	-3.59432
PANX3	-0.0836954	1.27754	-2.15485	0.0337454	0.915154	-3.59474
LOC100653079	0.054254	0.77794	2.15438	0.0337831	0.915154	-3.59555
MIR543	-0.0980761	0.987444	-2.1535	0.0338544	0.915154	-3.59707
NDUFB2-AS1	-0.141237	1.58042	-2.15329	0.033871	0.915154	-3.59743
SUZ12	-0.133882	6.28224	-2.15325	0.0338745	0.915154	-3.5975
ATG4D	-0.144228	2.75099	-2.15268	0.0339206	0.915154	-3.59849
LGALS7B	-0.121911	1.34446	-2.15232	0.0339496	0.915154	-3.59911
LINC00113	-0.0764745	0.769291	-2.15229	0.0339524	0.915154	-3.59916
SIK2	0.142835	2.94416	2.15217	0.033962	0.915154	-3.59937
F2RL3	-0.119142	1.70946	-2.15109	0.0340497	0.915154	-3.60124
GPR176	-0.0807105	0.976253	-2.15069	0.0340823	0.915154	-3.60193
C17orf51	-0.0844948	1.12417	-2.14985	0.0341508	0.915154	-3.60338
GOLPH3L	0.154639	3.21549	2.14977	0.0341565	0.915154	-3.6035
LOC643072	-0.180495	2.88963	-2.14973	0.0341598	0.915154	-3.60357
LOC284412	-0.105635	0.928332	-2.14961	0.0341701	0.915154	-3.60379
EXD3	-0.0919476	1.62042	-2.14955	0.034175	0.915154	-3.60389
PSMB9	0.14615	3.5198	2.14885	0.0342317	0.915154	-3.60509
PRSS46	-0.0640359	1.0213	-2.14839	0.0342698	0.915154	-3.60589
IGLJ2	0.261178	3.55553	2.14837	0.0342708	0.915154	-3.60592
LOC100190938	-0.0975758	1.66027	-2.14836	0.0342716	0.915154	-3.60593
DUSP3	0.145349	2.14543	2.14806	0.0342963	0.915154	-3.60645
DAPK1-IT1	0.136425	1.22212	2.14805	0.034297	0.915154	-3.60647
MIR4490	0.0568151	0.677071	2.14783	0.0343149	0.915154	-3.60685
XXYLT1-AS1	-0.0830414	1.09501	-2.14697	0.0343854	0.915154	-3.60833
RN5S242	-0.152651	1.51671	-2.14649	0.0344251	0.915154	-3.60916
LOC100131347	-0.0717105	0.960775	-2.14648	0.0344255	0.915154	-3.60917
FLJ38668	-0.1008	1.35494	-2.14551	0.0345054	0.915154	-3.61085
SORCS2	-0.083892	1.40252	-2.14504	0.0345437	0.915154	-3.61165
CNOT10	0.12241	2.43035	2.14491	0.034555	0.915154	-3.61189
SNORD20	0.267022	3.35808	2.14346	0.0346743	0.915154	-3.61438
RNF150	-0.0743755	0.97427	-2.14343	0.0346763	0.915154	-3.61442
SUN2	-0.105663	3.43401	-2.14323	0.0346927	0.915154	-3.61476
KAAG1	-0.116028	1.4228	-2.14144	0.0348413	0.915154	-3.61785
POPDC2	0.0641651	1.2112	2.14116	0.0348644	0.915154	-3.61833
SMPDL3A	0.155823	1.75366	2.141	0.0348779	0.915154	-3.61861
RHOA-IT1	0.170146	2.12553	2.14056	0.0349138	0.915154	-3.61935
CDK5R1	-0.147932	2.30376	-2.1403	0.0349357	0.915154	-3.6198
RN5S159	-0.113694	0.98792	-2.14018	0.0349454	0.915154	-3.62
TNXB	-0.0535932	1.99631	-2.13978	0.0349784	0.915154	-3.62069
ARMC7	-0.121673	2.0278	-2.13932	0.0350173	0.915154	-3.62149
HLF	-0.110973	1.67061	-2.1392	0.035027	0.915154	-3.62169
KIAA1024	-0.0909682	1.20025	-2.13905	0.0350396	0.915154	-3.62195
NLGN4Y	0.105463	1.16836	2.13864	0.0350741	0.915154	-3.62266
KREMEN2	-0.106946	1.76549	-2.13812	0.0351172	0.915154	-3.62355
RAB11FIP5	-0.109388	1.74964	-2.13796	0.0351307	0.915154	-3.62382
KIAA1274	-0.0887569	1.47669	-2.13769	0.0351529	0.915154	-3.62428
KRT18P49	-0.16122	2.32102	-2.13756	0.0351636	0.915154	-3.6245
CYB5RL	0.0723864	1.54147	2.13727	0.0351882	0.915154	-3.62501
FBRS	0.131223	2.60439	2.13699	0.0352113	0.915154	-3.62548
SLC2A5	-0.0929889	1.29852	-2.13644	0.0352578	0.915154	-3.62643
OOEP-AS1	-0.0785208	1.14471	-2.13632	0.0352677	0.915154	-3.62664
ZNF510	-0.129204	2.13886	-2.13559	0.0353285	0.915154	-3.62788
SPICE1	0.132791	1.68963	2.13536	0.0353483	0.915154	-3.62828
TRBV5-5	0.108295	1.42127	2.1335	0.0355042	0.915154	-3.63146
RTN4RL1	-0.11994	1.65311	-2.13314	0.0355343	0.915154	-3.63207
TBC1D9	0.237241	4.06124	2.13251	0.0355879	0.915154	-3.63316
SLC18A3	-0.126408	1.31452	-2.13231	0.0356045	0.915154	-3.6335
MYO10	0.0869267	1.37996	2.13217	0.0356168	0.915154	-3.63375
USP10	0.233294	4.99627	2.13204	0.0356273	0.915154	-3.63396
LOC100287482	-0.0956294	1.02977	-2.13145	0.0356774	0.915154	-3.63497
CTTN	-0.131689	1.91175	-2.13143	0.0356789	0.915154	-3.635
TLE1	0.0771658	1.37735	2.13135	0.035686	0.915154	-3.63515
SELO	-0.142376	2.52015	-2.13044	0.0357628	0.915154	-3.6367
LOC100505701	-0.0937309	1.18137	-2.13043	0.0357637	0.915154	-3.63672
LOC100506890	-0.0644041	0.69909	-2.13026	0.0357781	0.915154	-3.63701
OR4N5	-0.0880137	0.949198	-2.13019	0.0357836	0.915154	-3.63712
TTBK1	-0.095135	1.67493	-2.13018	0.035785	0.915154	-3.63715
LINC00504	-0.0630746	0.823406	-2.12995	0.0358043	0.915154	-3.63754
NLRP4	-0.0713389	1.00133	-2.12983	0.0358145	0.915154	-3.63774
AGPAT3	0.100716	2.32422	2.12932	0.0358577	0.915154	-3.63861
RHOV	-0.0987901	1.33954	-2.12885	0.0358977	0.915154	-3.63942
MIB2	-0.138396	2.30684	-2.12794	0.0359747	0.915154	-3.64096
GAL3ST1	0.0861389	1.5756	2.12794	0.0359755	0.915154	-3.64098
PRPSAP2	0.108169	2.05939	2.12774	0.0359925	0.915154	-3.64132
CYP51A1	0.108873	1.51804	2.1269	0.0360641	0.915154	-3.64275
HGS	-0.124097	3.40852	-2.12629	0.0361159	0.915154	-3.64379
SLC45A2	0.0829669	1.05645	2.12615	0.0361279	0.915154	-3.64403
PRSS55	-0.0665825	1.08368	-2.12551	0.0361823	0.915154	-3.64511
IL7	0.0793036	1.08534	2.12534	0.0361971	0.915154	-3.64541
MAP3K9	-0.0654783	1.33695	-2.12527	0.0362035	0.915154	-3.64554
TMEM221	-0.0902621	1.24024	-2.12449	0.0362703	0.915154	-3.64687
MALSU1	0.101635	1.53739	2.12438	0.0362792	0.915154	-3.64704
MIR3199-1	-0.0590522	0.670213	-2.12415	0.0362992	0.915154	-3.64744
GLIS2	-0.0931775	1.44505	-2.12376	0.0363324	0.915154	-3.6481
LOC100129316	0.0831946	1.35342	2.12244	0.0364461	0.915154	-3.65035
FBN3	-0.0743389	1.3481	-2.12193	0.0364901	0.915154	-3.65122
KIAA1984	-0.108415	1.84533	-2.1219	0.0364927	0.915154	-3.65127
FAM222A	-0.103595	1.34621	-2.12127	0.0365475	0.915154	-3.65236
OR2W5	-0.0948119	1.05366	-2.12109	0.0365631	0.915154	-3.65266
BANK1	0.171353	3.38702	2.12106	0.0365655	0.915154	-3.65271
STYK1	0.0748379	0.971927	2.1208	0.0365879	0.915154	-3.65315
ONECUT3	-0.0996565	1.30826	-2.1206	0.0366051	0.915154	-3.65349
SEC61A2	0.157444	1.83132	2.11985	0.0366697	0.915154	-3.65476
TMEM106C	-0.131702	2.05057	-2.1184	0.0367954	0.915154	-3.65723
CNTN4-AS2	0.0615863	0.817936	2.11778	0.0368492	0.915154	-3.65828
F10-AS1	0.0652466	0.739056	2.11733	0.036889	0.915154	-3.65906
LINC00566	-0.164566	3.32146	-2.11724	0.0368964	0.915154	-3.65921
MIR3119-1	0.0588319	0.747092	2.11655	0.0369571	0.915154	-3.66039
OR2A7	-0.0902624	1.03294	-2.11642	0.0369679	0.915154	-3.6606
TRIQK	-0.116797	1.94054	-2.11555	0.0370438	0.915154	-3.66208
FABP9	-0.0656983	1.03822	-2.11536	0.0370606	0.915154	-3.66241
LOC286114	0.0700379	0.989872	2.11453	0.0371333	0.915154	-3.66382
RN5S175	-0.0896048	1.05152	-2.1145	0.0371358	0.915154	-3.66387
CRHR2	-0.100906	1.80759	-2.11448	0.0371376	0.915154	-3.6639
TMEM5	0.0881708	1.65822	2.11427	0.0371556	0.915154	-3.66425
LOC143188	-0.104951	1.58497	-2.11423	0.0371591	0.915154	-3.66432
HMX3	-0.119054	1.50494	-2.11388	0.0371902	0.915154	-3.66492
IGFBPL1	-0.0904887	1.13333	-2.11384	0.0371935	0.915154	-3.66498
RND3	0.0684069	1.09995	2.11377	0.0371996	0.915154	-3.6651
CCND1	-0.102752	2.19079	-2.11374	0.0372021	0.915154	-3.66515
OXCT1-AS1	-0.0938014	1.32186	-2.1135	0.0372231	0.915154	-3.66556
RN5S199	-0.240363	7.15132	-2.11263	0.0372999	0.915154	-3.66704
GP1BA	-0.179172	2.83612	-2.11224	0.0373341	0.915154	-3.6677
MYL9	-0.353498	4.66773	-2.11207	0.0373493	0.915154	-3.668
FLJ46020	-0.135625	2.07852	-2.11204	0.0373514	0.915154	-3.66804
OR2M2	-0.0686725	0.817993	-2.11169	0.0373822	0.915154	-3.66863
SNAI2	-0.076852	1.12999	-2.11121	0.0374251	0.915154	-3.66946
SLC2A2	0.0673819	0.891112	2.11093	0.0374491	0.915154	-3.66992
LOC646268	0.0843389	1.36442	2.11031	0.0375045	0.915154	-3.67098
CD180	0.261191	4.29132	2.11016	0.0375174	0.915154	-3.67123
GPR37L1	-0.0950317	2.15738	-2.1093	0.0375931	0.915154	-3.67268
ZNF573	-0.0927646	1.00605	-2.10917	0.0376046	0.915154	-3.6729
PRR14	-0.0899782	4.35527	-2.10868	0.0376483	0.915154	-3.67374
DMAP1	-0.105707	1.4795	-2.10842	0.0376718	0.915154	-3.67419
MIR381	0.0614806	0.872809	2.10689	0.0378072	0.915154	-3.67677
COG4	0.160415	3.33662	2.10671	0.0378235	0.915154	-3.67708
CAPN11	-0.0780794	1.24119	-2.10632	0.0378575	0.915154	-3.67773
PCNP	-0.107099	5.83355	-2.10632	0.0378581	0.915154	-3.67774
DUSP2	-0.153414	2.79598	-2.10631	0.0378591	0.915154	-3.67776
MCF2L-AS1	0.106034	1.46286	2.10603	0.0378841	0.915154	-3.67824
ITGA11	-0.0624968	1.13687	-2.1054	0.0379403	0.915154	-3.6793
LOC644990	-0.0685952	1.00036	-2.10528	0.0379504	0.915154	-3.67949
LOC100653057	0.181954	1.62996	2.1052	0.0379581	0.915154	-3.67964
PCDHB8	0.0578372	0.731659	2.10472	0.038001	0.915154	-3.68045
MEIS3	-0.112817	1.24325	-2.10458	0.0380127	0.915154	-3.68068
ABT1	-0.135782	2.78963	-2.10423	0.0380448	0.915154	-3.68128
MIR3202-2	-0.0548489	0.681758	-2.10413	0.0380536	0.915154	-3.68145
ANKRD20A9P	-0.0770118	1.00329	-2.10296	0.0381577	0.915154	-3.68342
STAU2-AS1	-0.0829473	1.46119	-2.10271	0.0381805	0.915154	-3.68384
POLR2J4	0.243646	3.4144	2.10268	0.0381829	0.915154	-3.68389
GBP1P1	-0.113527	1.19016	-2.10245	0.038204	0.915154	-3.68429
PREX2	-0.0499228	1.01089	-2.10243	0.0382054	0.915154	-3.68431
REXO4	-0.146665	2.75862	-2.10197	0.0382471	0.915154	-3.6851
C9orf172	-0.131473	1.73235	-2.10077	0.0383549	0.915154	-3.68712
STX18-IT1	0.0690648	1.1938	2.10058	0.0383723	0.915154	-3.68745
LOC285441	-0.0694798	0.979603	-2.09955	0.0384652	0.915154	-3.68919
GBP6	0.192435	1.37597	2.09919	0.0384976	0.915154	-3.6898
PDIA5	-0.0637925	1.28697	-2.09798	0.038607	0.915154	-3.69184
NKAIN2	0.0649085	1.08044	2.09793	0.0386111	0.915154	-3.69191
OR5B21	-0.105231	1.22018	-2.09766	0.038636	0.915154	-3.69238
NAGA	0.133477	4.57282	2.09762	0.0386394	0.915154	-3.69244
NLRC5	0.228387	4.25816	2.09716	0.038681	0.915154	-3.69321
MIR4752	0.0705719	0.777845	2.09685	0.0387089	0.915154	-3.69373
LOC100129722	-0.120133	1.79729	-2.09621	0.038767	0.915154	-3.69481
TIMM44	-0.103606	1.88287	-2.09576	0.0388084	0.915154	-3.69558
COX11	-0.108296	2.02944	-2.09543	0.0388386	0.915154	-3.69614
NKX3-2	-0.125929	1.79916	-2.0953	0.03885	0.915154	-3.69635
NUDT22	0.0765208	1.22628	2.09516	0.0388627	0.915154	-3.69659
PRR15	-0.0819956	1.10361	-2.09458	0.0389157	0.915154	-3.69756
DSCAM	-0.0648402	1.02017	-2.09457	0.0389164	0.915154	-3.69758
SLC2A14	-0.0840485	1.06037	-2.09439	0.0389328	0.915154	-3.69788
PTCRA	-0.119649	2.58247	-2.09355	0.0390093	0.915154	-3.69929
KRTAP10-1	-0.223023	1.4212	-2.09015	0.0393209	0.915154	-3.70501
PDLIM1	-0.191499	2.51614	-2.08992	0.0393421	0.915154	-3.7054
NGFRAP1	-0.110954	1.74393	-2.08986	0.039348	0.915154	-3.70551
ANXA5	0.237106	6.20629	2.08976	0.039357	0.915154	-3.70567
PPP1R37	-0.0924311	1.48941	-2.08967	0.0393653	0.915154	-3.70582
CYR61	-0.112968	1.36349	-2.08955	0.039377	0.915154	-3.70603
BICC1	-0.0763259	1.18192	-2.08884	0.0394415	0.915154	-3.70721
PMS2CL	0.277261	2.79976	2.08862	0.0394618	0.915154	-3.70758
TRBV7-8	-0.120461	2.03158	-2.08851	0.0394727	0.915154	-3.70778
MAPRE2	-0.124987	5.64929	-2.08821	0.0394997	0.915154	-3.70827
ART3	-0.0676683	0.946376	-2.08819	0.0395016	0.915154	-3.7083
MIR589	-0.135647	1.69822	-2.08796	0.0395228	0.915154	-3.70869
GPR50	-0.0879622	1.49139	-2.08784	0.0395345	0.915154	-3.7089
CDK10	-0.122259	1.73005	-2.08774	0.0395434	0.915154	-3.70906
TSHB	-0.065592	0.833426	-2.08747	0.0395685	0.915154	-3.70952
ZNF408	-0.0782755	1.31991	-2.08703	0.0396094	0.915154	-3.71026
RFC3	-0.100813	1.86969	-2.08619	0.0396874	0.915154	-3.71168
EXT1	0.217839	3.61052	2.08577	0.0397261	0.915154	-3.71238
MME	-0.183705	7.94935	-2.08563	0.0397387	0.915154	-3.71261
ROPN1B	-0.118392	0.937296	-2.08556	0.0397456	0.915154	-3.71273
FDX1L	-0.0719986	1.65136	-2.08519	0.0397796	0.915154	-3.71334
KLK6	-0.0754032	2.01771	-2.08513	0.0397853	0.915154	-3.71345
LOC100506948	-0.0781991	1.57657	-2.0851	0.0397879	0.915154	-3.71349
TEX13A	-0.0839219	1.03995	-2.08485	0.0398115	0.915154	-3.71392
CASQ1	0.085371	1.26627	2.08467	0.0398282	0.915154	-3.71422
DVL2	-0.0998004	1.73689	-2.08438	0.0398549	0.915154	-3.7147
ZNF860	0.11379	1.36283	2.08414	0.0398779	0.915154	-3.71512
PCSK6	-0.0572226	1.55772	-2.08384	0.0399053	0.915154	-3.71561
RRAGB	0.114368	1.91092	2.08361	0.0399268	0.915154	-3.716
NKX2-2-AS1	-0.0792542	1.40002	-2.08347	0.0399395	0.915154	-3.71622
MCCC1	0.137385	1.6603	2.08342	0.0399443	0.915154	-3.71631
C19orf24	-0.188932	2.4733	-2.08256	0.040025	0.915154	-3.71776
CYTL1	-0.0946697	1.4866	-2.08203	0.040074	0.915154	-3.71864
NINJ1	-0.176683	4.26824	-2.08156	0.0401186	0.915154	-3.71944
PPBP	-0.296244	8.44982	-2.08123	0.040149	0.915154	-3.71998
C17orf57	0.0972083	1.38484	2.08118	0.040154	0.915154	-3.72007
OR10K2	-0.0730303	0.878411	-2.08117	0.0401549	0.915154	-3.72009
LOC339166	0.0751698	1.60251	2.07884	0.0403738	0.915154	-3.72399
TMEM222	0.132677	3.41932	2.07863	0.040393	0.915154	-3.72433
LTC4S	-0.0954703	2.30857	-2.07857	0.0403987	0.915154	-3.72443
NUDT17	-0.085699	1.14932	-2.07809	0.0404439	0.915154	-3.72524
PHF11	0.164159	4.02241	2.07794	0.0404588	0.915154	-3.7255
TRIO	0.0998296	2.20847	2.07781	0.0404702	0.915154	-3.7257
LAMTOR2	0.0995655	2.54403	2.0778	0.0404711	0.915154	-3.72572
ZNF705G	-0.0776172	0.743541	-2.07739	0.0405103	0.915154	-3.72641
RN5S57	-0.0432041	0.720648	-2.07715	0.0405325	0.915154	-3.72681
LOC100128371	0.139391	2.04607	2.07714	0.0405341	0.915154	-3.72683
LOC100507282	0.0610429	0.748388	2.07702	0.0405448	0.915154	-3.72702
NCCRP1	-0.103614	1.69084	-2.07626	0.0406169	0.915154	-3.7283
SYNE3	0.163005	2.85563	2.07578	0.0406626	0.915154	-3.72911
VWA7	-0.0568075	1.0908	-2.07552	0.0406867	0.915154	-3.72953
MIR99A	-0.0942448	1.76155	-2.07536	0.0407018	0.915154	-3.7298
CNTNAP4	0.0558634	0.956828	2.07536	0.0407026	0.915154	-3.72981
PLA2G4E	-0.0558011	1.1339	-2.07468	0.0407669	0.91527	-3.73094
TAF7L	-0.0749911	1.16335	-2.0742	0.0408126	0.91527	-3.73175
LOC440416	-0.0441911	0.999442	-2.07414	0.0408183	0.91527	-3.73185
RN5S75	0.0714889	0.839204	2.0733	0.0408981	0.91527	-3.73325
ZMYND8	0.160457	3.81357	2.07302	0.0409242	0.91527	-3.73371
N6AMT1	-0.091037	1.86625	-2.07289	0.0409371	0.91527	-3.73393
MST4	-0.0966683	4.78819	-2.07225	0.0409976	0.91527	-3.73499
DCLK2	0.0500743	1.0287	2.07224	0.0409991	0.91527	-3.73502
AMOTL1	-0.0718038	1.50044	-2.07157	0.0410626	0.915453	-3.73613
LOC100507431	-0.0794795	1.20307	-2.07042	0.0411726	0.915453	-3.73805
C6orf141	-0.0474139	1.01696	-2.07012	0.0412014	0.915453	-3.73855
ADCY9	0.0924394	1.68961	2.07002	0.0412113	0.915453	-3.73872
SGSM3	-0.121677	1.97575	-2.06998	0.0412147	0.915453	-3.73878
LINC00515	0.0730072	1.08879	2.06955	0.0412562	0.915453	-3.7395
MIR3187	-0.129569	1.553	-2.06948	0.0412622	0.915453	-3.73961
PENK	-0.068053	1.16444	-2.06897	0.0413113	0.915735	-3.74046
DUSP28	-0.127135	1.83944	-2.06812	0.0413934	0.916111	-3.74188
LOC100132831	-0.123736	1.77195	-2.06804	0.0414012	0.916111	-3.74202
LOC646498	-0.0582471	0.936089	-2.06752	0.041451	0.916405	-3.74288
LCE3D	0.101701	1.21813	2.06639	0.0415596	0.918001	-3.74476
HIST1H2BD	-0.160964	1.83705	-2.06531	0.0416639	0.918382	-3.74655
HIST2H2AC	-0.159435	8.95936	-2.06531	0.0416645	0.918382	-3.74656
FLJ37644	0.0695215	1.11369	2.06508	0.0416865	0.918382	-3.74694
VEPH1	-0.0847288	1.3952	-2.06391	0.0418001	0.918905	-3.74889
PDCD2L	-0.0921329	2.14277	-2.06348	0.0418416	0.918905	-3.7496
C6orf183	-0.0659165	0.986585	-2.06337	0.0418521	0.918905	-3.74978
FLJ27352	0.0881181	1.26526	2.06333	0.0418565	0.918905	-3.74986
CCDC154	-0.0908374	1.6134	-2.06201	0.0419839	0.920609	-3.75203
KIAA1683	-0.117322	1.69634	-2.0608	0.0421019	0.920609	-3.75405
HSF2	-0.122961	1.68598	-2.06071	0.0421114	0.920609	-3.75421
RRAD	-0.0580595	0.96909	-2.06012	0.0421687	0.920609	-3.75518
LOC344595	-0.0611976	0.978462	-2.05999	0.0421816	0.920609	-3.7554
CCNB2	0.0594967	0.907591	2.05997	0.0421829	0.920609	-3.75542
CIDEC	-0.0654101	1.01356	-2.0599	0.0421905	0.920609	-3.75555
BTBD9-AS1	0.0960513	1.18324	2.05896	0.042282	0.921094	-3.7571
LINC00334	-0.0962911	1.42135	-2.05885	0.0422933	0.921094	-3.75729
ADAP2	0.166554	3.24767	2.0581	0.042366	0.921094	-3.75852
FRMD6-AS1	-0.112195	1.83512	-2.0581	0.0423664	0.921094	-3.75853
PTS	0.181402	2.78896	2.0578	0.0423959	0.921094	-3.75903
LOC642361	0.180995	1.93364	2.05673	0.0425007	0.921785	-3.7608
MFN2	0.245448	4.76465	2.05652	0.0425211	0.921785	-3.76114
TRAV18	-0.0871569	1.23615	-2.05591	0.042582	0.921785	-3.76217
CGB7	-0.118708	1.38022	-2.05563	0.0426088	0.921785	-3.76262
SESTD1	0.223556	3.66239	2.05561	0.0426111	0.921785	-3.76265
SEC14L1P1	0.168015	2.08089	2.05502	0.0426693	0.92225	-3.76363
OR8G5	0.0639648	1.02305	2.05446	0.0427244	0.922265	-3.76455
LRP4-AS1	-0.117165	1.21203	-2.05427	0.0427433	0.922265	-3.76487
CCDC43	0.117341	1.89451	2.05374	0.0427959	0.922608	-3.76575
EPB41L4B	-0.0814612	1.06097	-2.05301	0.0428683	0.922673	-3.76696
ADORA1	-0.116519	1.23565	-2.05297	0.0428723	0.922673	-3.76703
KMO	0.166607	2.19258	2.05053	0.0431149	0.923876	-3.77107
MIR4759	0.0727809	0.600339	2.05023	0.0431444	0.923876	-3.77156
TMEM178A	-0.0674053	1.19265	-2.04934	0.0432332	0.923876	-3.77303
MIR371A	-0.0990915	1.42417	-2.04923	0.0432441	0.923876	-3.77321
PROS1	-0.120565	1.37251	-2.04903	0.0432645	0.923876	-3.77355
CLK2P	-0.148657	1.45452	-2.04894	0.0432729	0.923876	-3.77369
FLJ16124	-0.0443466	0.907613	-2.04861	0.0433065	0.923876	-3.77424
GABARAPL3	-0.0841418	1.12509	-2.04802	0.043365	0.923876	-3.77521
NMNAT3	-0.0843252	1.32672	-2.04766	0.043401	0.923876	-3.7758
ADPRHL2	-0.0938985	1.28066	-2.04521	0.0436466	0.923876	-3.77984
KDM4C	0.133895	3.57139	2.04471	0.043697	0.923876	-3.78066
LOC150935	-0.0668896	0.964605	-2.04464	0.0437042	0.923876	-3.78078
C17orf80	-0.0863807	1.71619	-2.04426	0.0437426	0.923876	-3.78141
PCGF2	-0.135073	2.04724	-2.04393	0.0437762	0.923876	-3.78196
MIR3161	0.360433	4.10375	2.04393	0.0437764	0.923876	-3.78196
PPP1R2P3	-0.0894925	0.801697	-2.04387	0.0437824	0.923876	-3.78206
RN5S220	0.0616842	0.751835	2.04356	0.0438129	0.923876	-3.78256
GSS	0.106028	1.85321	2.04233	0.0439376	0.923876	-3.78459
IGFL1	-0.0853559	1.26368	-2.04135	0.0440367	0.923876	-3.7862
ZNF788	-0.093457	1.28086	-2.0405	0.0441232	0.923876	-3.7876
NEUROD2	-0.0927564	1.13545	-2.04018	0.0441555	0.923876	-3.78812
DCAF12L2	-0.0799623	0.976029	-2.04011	0.0441627	0.923876	-3.78824
RNF166	-0.156855	5.05283	-2.04005	0.044169	0.923876	-3.78834
TRIM51GP	0.0697896	0.836782	2.03995	0.0441791	0.923876	-3.7885
TM9SF1	0.121366	2.76206	2.03956	0.0442187	0.923876	-3.78915
AFM	-0.0548445	0.809692	-2.03892	0.0442838	0.923876	-3.7902
FAM171B	-0.0801704	1.11316	-2.03844	0.0443326	0.923876	-3.79098
LOC100132705	0.168195	1.51884	2.03798	0.0443801	0.923876	-3.79175
ASAP3	-0.0888911	1.40839	-2.03745	0.0444341	0.923876	-3.79262
OGFRL1	-0.102028	8.43596	-2.0373	0.0444488	0.923876	-3.79285
SGK2	-0.0597516	1.19846	-2.03703	0.0444767	0.923876	-3.7933
SKINTL	-0.0545696	0.91581	-2.03699	0.0444808	0.923876	-3.79337
MYLK2	-0.0549335	0.965282	-2.03682	0.0444978	0.923876	-3.79364
CTDSP1	-0.0843436	2.80007	-2.03673	0.0445074	0.923876	-3.79379
MOAP1	-0.140102	2.23316	-2.03655	0.0445256	0.923876	-3.79409
LACTB	0.217227	3.54148	2.03605	0.0445768	0.923876	-3.79491
TRDV2	-0.124318	1.1096	-2.03585	0.0445979	0.923876	-3.79525
RN5S361	-0.143573	1.28344	-2.03493	0.0446921	0.923876	-3.79675
TYSND1	-0.0922252	2.16442	-2.03484	0.0447009	0.923876	-3.79689
DHRS4	-0.188021	1.80347	-2.03473	0.0447122	0.923876	-3.79707
RN5S228	-0.0800065	0.907934	-2.03432	0.0447548	0.923876	-3.79775
CDH9	-0.0530349	0.900989	-2.03378	0.0448104	0.923876	-3.79864
FLJ38379	-0.0993719	1.21395	-2.03366	0.0448227	0.923876	-3.79884
ABCC11	0.0577768	1.09627	2.0329	0.0449011	0.923876	-3.80009
MMP16	-0.060471	1.29595	-2.03229	0.0449643	0.923876	-3.80109
LOC255512	-0.11602	1.99056	-2.03195	0.0449993	0.923876	-3.80165
MIR3935	-0.0693303	1.74355	-2.03171	0.0450238	0.923876	-3.80203
IPO11	0.107984	1.94745	2.03084	0.0451137	0.923876	-3.80346
ZPLD1	0.0492566	1.03936	2.02995	0.0452056	0.923876	-3.80491
ASB6	-0.137609	2.93388	-2.02994	0.0452073	0.923876	-3.80494
SNORD83A	0.0927196	1.00081	2.0285	0.0453562	0.923876	-3.80728
NPW	-0.161989	2.20135	-2.0272	0.0454915	0.923876	-3.80941
DACT3	-0.0757918	1.16143	-2.02704	0.0455086	0.923876	-3.80968
CISD1	0.0980518	1.6507	2.02701	0.0455115	0.923876	-3.80972
MS4A4A	0.0923677	0.991776	2.0266	0.0455547	0.923876	-3.8104
CPNE6	-0.059607	1.33438	-2.02639	0.0455761	0.923876	-3.81074
CD300LF	0.184214	5.34606	2.02633	0.0455828	0.923876	-3.81084
DEFT1P	-0.0812202	1.6773	-2.02597	0.0456205	0.923876	-3.81143
XPO5	0.109415	2.12813	2.02574	0.0456443	0.923876	-3.8118
PVR	0.119236	1.97357	2.0257	0.0456488	0.923876	-3.81187
MAP1LC3B	-0.10318	2.35947	-2.02552	0.0456668	0.923876	-3.81216
SNORA11C	-0.0683952	0.743025	-2.02487	0.0457349	0.923876	-3.81322
LRRCC1	0.104593	1.32429	2.02473	0.0457502	0.923876	-3.81346
MIR520D	0.0859121	0.777878	2.02437	0.0457875	0.923876	-3.81404
NAIP	0.237218	8.365	2.02432	0.0457934	0.923876	-3.81413
ASAH2C	0.117501	1.27532	2.0241	0.0458159	0.923876	-3.81448
GRPR	0.0654964	0.878331	2.02354	0.0458744	0.923876	-3.81539
TMEM82	-0.101322	1.61036	-2.02339	0.0458906	0.923876	-3.81564
PLA2G4A	0.142728	1.77853	2.02183	0.0460542	0.923876	-3.81818
DZANK1-AS1	-0.0459934	1.15561	-2.0207	0.0461735	0.923876	-3.82003
ST6GALNAC5	-0.0621362	1.20794	-2.02014	0.0462326	0.923876	-3.82094
ERLIN2	-0.100305	2.23381	-2.01954	0.0462967	0.923876	-3.82193
LIMS2	-0.104735	1.29647	-2.01896	0.0463576	0.923876	-3.82286
MIR4676	0.072703	0.907831	2.01857	0.0463998	0.923876	-3.82351
TSNAX-DISC1	0.159436	3.4117	2.01755	0.0465079	0.923876	-3.82517
CCNY	-0.0836881	3.53696	-2.01731	0.0465328	0.923876	-3.82555
SPP2	0.05882	0.830694	2.01722	0.0465423	0.923876	-3.8257
TTC1	0.161821	4.08404	2.01697	0.0465689	0.923876	-3.82611
GRK1	-0.0643147	1.20547	-2.01695	0.0465718	0.923876	-3.82615
FAN1	0.133592	2.13165	2.01656	0.0466132	0.923876	-3.82678
TREX2	-0.109718	1.45182	-2.0157	0.0467049	0.923876	-3.82819
ZNF705D	-0.0925689	1.15693	-2.01558	0.046717	0.923876	-3.82837
PEX2	-0.0912213	1.73687	-2.0149	0.0467894	0.923876	-3.82947
FMO1	-0.0624609	0.842744	-2.01485	0.0467951	0.923876	-3.82956
ITGAD	-0.0854161	1.35357	-2.01451	0.046832	0.923876	-3.83012
C12orf45	0.095073	1.32708	2.01442	0.0468409	0.923876	-3.83026
ESRG	-0.128836	1.00479	-2.0144	0.0468428	0.923876	-3.83029
DKFZp761P0212	-0.0878328	1.58809	-2.0144	0.0468434	0.923876	-3.83029
WASH6P	-0.128041	1.29294	-2.01384	0.0469032	0.923876	-3.8312
SYCP1	0.0500613	0.786726	2.01382	0.0469058	0.923876	-3.83124
PTPRD	-0.0553519	1.03072	-2.01359	0.0469301	0.923876	-3.83161
PRICKLE3	-0.08591	1.83167	-2.01324	0.0469678	0.923876	-3.83218
C20orf112	-0.0998968	2.89634	-2.01241	0.0470562	0.923876	-3.83352
BUB3	0.149875	4.6061	2.01183	0.0471189	0.923876	-3.83447
C15orf61	-0.0986895	1.22662	-2.01182	0.04712	0.923876	-3.83449
IGLON5	-0.0940436	1.28439	-2.0117	0.0471322	0.923876	-3.83467
KRTAP7-1	-0.0681264	0.92969	-2.01092	0.0472162	0.923876	-3.83594
MYB-AS1	-0.0932747	1.42516	-2.01081	0.0472284	0.923876	-3.83613
LUC7L	0.163571	2.94113	2.01064	0.0472471	0.923876	-3.83641
CENPK	0.303658	1.5794	2.01062	0.0472489	0.923876	-3.83643
UTP6	0.191541	3.8427	2.01062	0.047249	0.923876	-3.83644
FAM58BP	-0.10573	1.75854	-2.01049	0.0472631	0.923876	-3.83665
TRPC1	0.0618531	1.08083	2.01041	0.0472719	0.923876	-3.83678
GANC	0.219144	3.34049	2.00991	0.0473251	0.923876	-3.83758
RN5S76	0.0931679	1.12085	2.00975	0.0473429	0.923876	-3.83785
DEPDC4	0.0509722	0.795902	2.00928	0.0473931	0.923876	-3.83861
LOC100506103	-0.0641397	1.42309	-2.00926	0.047395	0.923876	-3.83863
RN5S69	-0.24387	2.48702	-2.00882	0.0474431	0.923876	-3.83936
SNORD114-17	0.118679	1.33018	2.00814	0.0475168	0.923876	-3.84046
NPTXR	0.0967849	1.24367	2.00798	0.0475344	0.923876	-3.84073
MIR4659B	0.0557195	0.591381	2.00796	0.047536	0.923876	-3.84075
XRCC6BP1	-0.122469	1.25682	-2.0073	0.047608	0.923876	-3.84183
OR5A1	-0.0570949	0.89619	-2.00658	0.0476852	0.923876	-3.84298
TMTC4	0.0839066	1.83834	2.00657	0.0476867	0.923876	-3.843
KRTAP24-1	-0.0478293	0.77591	-2.00649	0.0476957	0.923876	-3.84314
KRTAP12-4	-0.0933322	1.51178	-2.00591	0.0477587	0.923876	-3.84408
MAPK11	-0.11089	1.42115	-2.00558	0.047794	0.923876	-3.8446
SMO	-0.0699745	1.2585	-2.00462	0.0478988	0.923876	-3.84616
KIAA0146	0.123352	2.30018	2.00455	0.0479064	0.923876	-3.84628
ACTL7A	-0.0576319	0.988365	-2.00368	0.0480016	0.923876	-3.84769
GPR115	-0.0412983	0.98404	-2.00336	0.0480362	0.923876	-3.8482
RN5S437	-0.0864135	1.00056	-2.00306	0.0480687	0.923876	-3.84868
C7orf10	-0.0677704	1.24749	-2.00283	0.048094	0.923876	-3.84906
ERMN	0.140488	1.51614	2.00275	0.0481034	0.923876	-3.8492
OR2B6	0.102841	1.07407	2.0027	0.0481087	0.923876	-3.84927
C16orf11	-0.133586	2.09657	-2.00228	0.0481547	0.923876	-3.84996
CXorf65	0.119119	2.16639	2.00212	0.0481724	0.923876	-3.85022
NLE1	-0.0971027	1.77794	-2.00208	0.0481766	0.923876	-3.85028
MIR3691	-0.147516	1.92765	-2.00205	0.0481791	0.923876	-3.85032
DHRS11	-0.102025	1.32197	-2.002	0.0481853	0.923876	-3.85041
RN5S501	0.0806958	0.905212	2.00196	0.048189	0.923876	-3.85046
TNF	-0.111899	2.23746	-2.00193	0.0481924	0.923876	-3.85051
MIR3200	0.0858895	0.933448	2.00178	0.0482091	0.923876	-3.85076
KLRC2	-0.161259	1.51706	-2.0016	0.0482287	0.923876	-3.85105
CHRNA2	-0.0804724	1.23087	-2.0015	0.0482397	0.923876	-3.85121
ZNF419	-0.0911717	1.48522	-2.00146	0.0482441	0.923876	-3.85127
UBE2O	0.359347	5.59003	2.00122	0.0482706	0.923876	-3.85166
C19orf75	-0.0774484	1.16229	-2.0011	0.0482836	0.923876	-3.85186
MIR342	-0.0934869	2.02754	-2.00108	0.0482857	0.923876	-3.85189
C22orf23	-0.0738605	1.43354	-2.00025	0.0483768	0.923876	-3.85323
LOC100507607	0.149966	3.20894	2.00011	0.0483928	0.923876	-3.85346
RN5S350	-0.0834973	0.945677	-1.99947	0.048463	0.923876	-3.8545
IGHM	0.114676	2.90441	1.9994	0.048471	0.923876	-3.85461
PROKR2	-0.0802756	1.16341	-1.99933	0.0484779	0.923876	-3.85471
LOC100129297	-0.0862615	1.2701	-1.99908	0.0485058	0.923876	-3.85512
KLHL21	-0.114348	3.67621	-1.99869	0.048549	0.923876	-3.85576
KIAA0664	0.0874984	1.42788	1.99815	0.0486088	0.923876	-3.85663
CABP5	0.133354	1.57864	1.99727	0.0487056	0.923876	-3.85805
PRKX-AS1	-0.0792704	1.21026	-1.99719	0.0487143	0.923876	-3.85817
C17orf107	-0.10214	1.52277	-1.99688	0.0487485	0.923876	-3.85867
DIRAS2	-0.0866867	1.38991	-1.99682	0.0487555	0.923876	-3.85877
RN5S180	0.233263	1.98169	1.99652	0.0487882	0.923876	-3.85925
LOC100289673	0.0752114	1.08971	1.99652	0.0487888	0.923876	-3.85926
KIAA0182	0.113689	2.36613	1.99631	0.0488113	0.923876	-3.85959
PPP1R9A	0.0676122	1.29167	1.99627	0.0488163	0.923876	-3.85966
C19orf67	-0.0896074	1.4487	-1.99614	0.0488303	0.923876	-3.85986
WNT7A	-0.10175	2.18142	-1.99595	0.0488514	0.923876	-3.86017
PSD	-0.124355	1.51765	-1.99577	0.0488718	0.923876	-3.86047
GAS5-AS1	0.0940757	1.21579	1.9956	0.0488905	0.923876	-3.86074
HOXB1	-0.0529077	0.977794	-1.99529	0.048925	0.923876	-3.86124
ABCC6	-0.115915	1.52989	-1.99501	0.0489562	0.923876	-3.8617
WTAP	-0.0878058	5.33696	-1.99489	0.0489695	0.923876	-3.86189
TFAP2C	-0.087811	1.07882	-1.99387	0.0490829	0.923876	-3.86353
EPHA7	-0.0736388	1.05488	-1.99334	0.0491418	0.923876	-3.86439
TBC1D8	0.151196	3.03024	1.99322	0.0491545	0.923876	-3.86457
POU4F2	-0.0720965	1.2021	-1.99322	0.049155	0.923876	-3.86458
FDPSL2A	0.106576	1.17082	1.99319	0.049158	0.923876	-3.86462
ZNF513	-0.121504	2.36392	-1.99287	0.0491933	0.923876	-3.86513
CTC1	0.21343	3.55668	1.99287	0.0491943	0.923876	-3.86515
MIR516B2	0.0941302	0.836569	1.99262	0.0492222	0.923876	-3.86555
FOXE1	-0.0842433	1.15544	-1.99246	0.0492398	0.923876	-3.8658
LOC100506835	-0.079106	1.13501	-1.99203	0.0492876	0.923876	-3.86649
PEA15	0.171377	4.84512	1.9916	0.0493359	0.923876	-3.86719
UBXN8	-0.0937865	1.25692	-1.99142	0.0493559	0.923876	-3.86748
LOC100130428	0.142522	1.72038	1.99103	0.0493993	0.923876	-3.8681
ZNF300	-0.109006	1.25911	-1.99087	0.0494169	0.923876	-3.86835
GLIS1	-0.0717154	1.44439	-1.99072	0.0494337	0.923876	-3.86859
MIR3545	0.0512198	0.713967	1.98971	0.0495467	0.925301	-3.87022
EIF6	0.0936721	2.65076	1.98871	0.0496593	0.925425	-3.87183
ANXA2	0.16467	2.35075	1.98852	0.0496811	0.925425	-3.87214
SPIC	-0.0623993	0.696734	-1.98804	0.0497352	0.925425	-3.87291
GFRA2	0.0741766	1.45714	1.98795	0.0497444	0.925425	-3.87305
FAM69B	-0.094631	1.42679	-1.98795	0.0497453	0.925425	-3.87306
HEATR5A	0.207811	3.6863	1.98769	0.0497742	0.925425	-3.87347
RN5S323	-0.0766328	0.922896	-1.98667	0.0498896	0.926515	-3.87512
PYGO2	-0.103536	1.96048	-1.98652	0.0499066	0.926515	-3.87536
FAM176B	0.103314	1.36709	1.9858	0.0499868	0.926635	-3.8765
MYBL2	-0.102457	1.70997	-1.98565	0.0500037	0.926635	-3.87674
TAZ	-0.098876	2.08787	-1.98535	0.0500386	0.926635	-3.87723
MAGED2	-0.150364	2.59918	-1.98515	0.0500605	0.926635	-3.87754
C19orf76	-0.103789	1.43874	-1.98333	0.0502667	0.929583	-3.88046
PCDH20	-0.0643909	0.951831	-1.98291	0.0503144	0.929583	-3.88114
LOC390937	-0.127327	1.43861	-1.98271	0.0503377	0.929583	-3.88147
CSAG2	-0.0805896	2.21486	-1.98245	0.0503677	0.929583	-3.88189
LPL	-0.0609782	0.97304	-1.98124	0.0505052	0.930685	-3.88382
TNPO2	-0.0987581	2.29988	-1.98111	0.0505195	0.930685	-3.88402
HPX	-0.0604819	1.16784	-1.98056	0.050583	0.930685	-3.88492
PPA1	0.14184	1.60615	1.97998	0.0506493	0.930685	-3.88585
KYNUP1	-0.0618022	1.4443	-1.97976	0.0506739	0.930685	-3.88619
LOC388948	-0.0723796	1.02536	-1.97942	0.0507125	0.930685	-3.88673
MIR378A	0.0716772	0.889728	1.97942	0.0507125	0.930685	-3.88673
C14orf45	0.156294	1.57005	1.97933	0.0507236	0.930685	-3.88689
GFI1B	-0.153902	3.10664	-1.979	0.0507607	0.930686	-3.8874
WDR26	0.157741	6.20411	1.978	0.0508751	0.931888	-3.889
LOC149134	-0.0817745	1.06894	-1.97756	0.0509254	0.931888	-3.8897
FRG1B	-0.158506	2.1581	-1.97721	0.050966	0.931888	-3.89027
AIM2	0.244574	4.39932	1.97714	0.0509745	0.931888	-3.89039
EFCAB4A	-0.124444	1.50125	-1.97671	0.0510232	0.932101	-3.89107
MIR148B	0.0746764	1.16594	1.97525	0.0511919	0.932355	-3.89341
MEX3D	-0.0906741	1.24199	-1.97504	0.0512158	0.932355	-3.89374
RGS18	-0.178334	6.89708	-1.97451	0.0512772	0.932355	-3.89459
SASH1	0.107654	1.79695	1.97421	0.0513115	0.932355	-3.89506
MIR1255A	0.0677122	0.915035	1.97367	0.0513741	0.932355	-3.89593
TMEM156	0.209686	2.5224	1.97366	0.0513759	0.932355	-3.89595
LSM3	0.103402	1.11313	1.97329	0.0514183	0.932355	-3.89654
TAF9B	-0.150544	1.91734	-1.97253	0.0515059	0.932355	-3.89774
RBP5	-0.0989299	2.09737	-1.97151	0.0516245	0.932355	-3.89937
SMPD1	-0.0957699	2.16224	-1.97084	0.0517018	0.932355	-3.90043
HIST1H1E	-0.289321	5.83214	-1.97014	0.0517835	0.932355	-3.90155
DLEU7	-0.0646839	1.12256	-1.96993	0.0518078	0.932355	-3.90189
BTN2A2	0.0961636	1.75662	1.96993	0.0518078	0.932355	-3.90189
SH2B1	-0.0856165	1.75686	-1.96989	0.0518125	0.932355	-3.90195
CCDC106	-0.069833	0.977574	-1.96954	0.0518542	0.932355	-3.90252
CDCP2	-0.0584682	0.977582	-1.96917	0.0518969	0.932355	-3.9031
MYO7B	-0.0486088	1.39467	-1.96893	0.0519246	0.932355	-3.90348
STK35	-0.100333	1.86992	-1.9683	0.0519982	0.932355	-3.90449
FOXN4	-0.130256	1.46217	-1.96804	0.0520288	0.932355	-3.9049
SLC35G5	-0.166329	1.03844	-1.96778	0.0520591	0.932355	-3.90532
FZD6	-0.0989025	1.55797	-1.96689	0.0521629	0.932355	-3.90673
RASEF	-0.0473508	0.914659	-1.96685	0.0521684	0.932355	-3.9068
MRGPRE	-0.0986872	1.65697	-1.9668	0.0521746	0.932355	-3.90689
ABCC12	0.0625312	0.976287	1.96668	0.0521887	0.932355	-3.90708
TPRKB	0.0911887	1.25226	1.96651	0.0522083	0.932355	-3.90734
ANKRD33B-AS1	-0.0606463	0.933655	-1.96643	0.0522178	0.932355	-3.90747
GRIA3	0.0671913	1.10472	1.96642	0.0522187	0.932355	-3.90748
MIR4491	-0.0573706	0.687655	-1.96576	0.0522956	0.932355	-3.90853
MICALCL	0.277189	3.94704	1.96556	0.0523194	0.932355	-3.90885
LRWD1	-0.134118	2.11339	-1.96534	0.0523455	0.932355	-3.9092
ZNF7	0.0858181	1.80529	1.96523	0.0523584	0.932355	-3.90938
FBXL6	-0.10555	1.46033	-1.96506	0.052378	0.932355	-3.90964
AIM1L	-0.091341	1.54046	-1.96506	0.0523782	0.932355	-3.90964
RN5S416	-0.13417	1.22459	-1.96424	0.0524748	0.932355	-3.91095
AGRN	-0.0731279	1.48885	-1.96383	0.0525227	0.932355	-3.9116
OR1S1	0.112903	1.05975	1.9637	0.0525382	0.932355	-3.91181
MFAP2	-0.0660658	1.28444	-1.96358	0.0525522	0.932355	-3.91199
GRIA4	-0.0624304	1.12982	-1.96349	0.0525626	0.932355	-3.91213
RNU7-67P	-0.0963776	0.920718	-1.96329	0.0525865	0.932355	-3.91246
PGBD4	-0.133606	2.43646	-1.96301	0.0526195	0.932355	-3.9129
CTSG	-0.136919	1.36294	-1.96283	0.0526413	0.932355	-3.91319
MIR634	0.114079	1.17814	1.96279	0.0526461	0.932355	-3.91326
MEST	-0.0647558	1.01317	-1.96277	0.0526482	0.932355	-3.91329
SRCRB4D	-0.0788814	1.41882	-1.96243	0.0526884	0.932355	-3.91383
SNORA38B	0.270096	8.69262	1.96223	0.0527125	0.932355	-3.91415
DCAF4L2	-0.0868358	1.48857	-1.96157	0.0527894	0.932355	-3.91518
GCM1	-0.0919208	1.76936	-1.96148	0.052801	0.932355	-3.91534
TMEM80	-0.104662	1.90487	-1.96115	0.0528399	0.932355	-3.91586
MIR1226	-0.227209	2.30255	-1.96095	0.0528635	0.932355	-3.91618
MIR4252	0.0894128	1.234	1.96043	0.0529248	0.932355	-3.917
CNKSR1	-0.102543	1.3996	-1.96025	0.0529461	0.932355	-3.91728
SGOL1-AS1	0.0943222	1.32635	1.96009	0.0529658	0.932355	-3.91755
PLXNA3	-0.0742226	1.37666	-1.95914	0.053078	0.933101	-3.91904
GCSHP3	0.124011	1.31458	1.9591	0.0530825	0.933101	-3.9191
OR6K2	0.0576363	0.967595	1.95857	0.0531457	0.933559	-3.91994
C19orf45	-0.0665066	1.03738	-1.95752	0.0532714	0.933906	-3.92162
TPSAB1	-0.150798	1.40929	-1.95749	0.0532752	0.933906	-3.92167
NCAN	-0.0890516	1.62492	-1.95619	0.0534298	0.933906	-3.92372
LOC100293744	-0.212217	5.17347	-1.95587	0.0534689	0.933906	-3.92424
ING1	-0.0896656	1.71938	-1.95551	0.0535121	0.933906	-3.92481
LBX2	-0.099719	1.30417	-1.95541	0.0535234	0.933906	-3.92496
RNU6-68	-0.0713338	0.755037	-1.95528	0.0535388	0.933906	-3.92516
FLJ31485	-0.0650847	1.08059	-1.95507	0.0535642	0.933906	-3.9255
C14orf149	-0.0864763	1.76202	-1.95504	0.0535678	0.933906	-3.92554
RGS22	0.0449497	0.77531	1.95479	0.0535974	0.933906	-3.92593
MIR4297	-0.117495	1.35412	-1.95473	0.0536055	0.933906	-3.92604
HS3ST2	-0.0924995	1.16634	-1.95468	0.0536113	0.933906	-3.92612
MS4A10	-0.074994	1.40917	-1.95418	0.0536709	0.933959	-3.9269
ELOVL3	-0.055812	0.931406	-1.95403	0.0536886	0.933959	-3.92714
FAM123A	-0.068557	1.09728	-1.95364	0.0537356	0.93413	-3.92776
POTED	-0.0923256	1.02805	-1.95282	0.0538344	0.935201	-3.92906
KCNA5	-0.0931741	1.20046	-1.95226	0.0539021	0.93573	-3.92994
MARK4	-0.124681	2.44668	-1.95135	0.0540112	0.936977	-3.93137
STARD13-IT1	-0.0570853	0.843825	-1.95047	0.0541182	0.938185	-3.93277
ACAA2	0.17188	2.32931	1.94908	0.0542863	0.939899	-3.93497
FAHD2CP	-0.142611	1.96643	-1.94878	0.0543226	0.939899	-3.93544
NOVA2	-0.0880935	1.42507	-1.94851	0.0543554	0.939899	-3.93587
C14orf119	-0.114459	2.09964	-1.94701	0.0545376	0.939899	-3.93823
CDKN2B	-0.0826507	1.23901	-1.94699	0.0545402	0.939899	-3.93826
OR2AG1	-0.080138	0.860766	-1.94684	0.0545587	0.939899	-3.9385
THNSL1	-0.0960433	1.61421	-1.946	0.0546604	0.939899	-3.93982
RNU4-9P	0.186998	1.52289	1.94598	0.0546632	0.939899	-3.93986
MIR376A1	0.066565	0.6382	1.94591	0.0546711	0.939899	-3.93996
SCRN2	0.0967894	1.57792	1.94551	0.0547199	0.939899	-3.94059
SEC14L2	-0.0871189	1.10782	-1.94432	0.0548652	0.939899	-3.94246
PZP	0.0727919	1.04925	1.9442	0.0548809	0.939899	-3.94267
RIIAD1	-0.0686831	1.00878	-1.94362	0.0549509	0.939899	-3.94357
ENTPD2	-0.0899326	1.4214	-1.94327	0.0549942	0.939899	-3.94412
TGS1	0.164093	3.3592	1.94304	0.0550219	0.939899	-3.94448
DHX29	0.172938	3.196	1.94285	0.0550457	0.939899	-3.94478
MIR599	-0.0625935	0.967607	-1.94283	0.0550487	0.939899	-3.94482
TRAF5	0.22406	3.61707	1.94279	0.0550536	0.939899	-3.94488
ATP5EP2	-0.11351	1.13366	-1.94266	0.0550695	0.939899	-3.94509
KANK3	-0.0942201	1.75556	-1.94228	0.0551159	0.939899	-3.94568
B4GALNT4	-0.0763053	1.48563	-1.94206	0.0551424	0.939899	-3.94602
NBPF12	0.252126	3.69262	1.94088	0.0552872	0.939899	-3.94787
RHO	-0.0825152	1.25065	-1.94016	0.0553766	0.939899	-3.94902
TPSG1	-0.0961137	1.36734	-1.94012	0.0553814	0.939899	-3.94908
FCGR2B	0.167866	2.47702	1.93968	0.0554361	0.939899	-3.94977
GABRA3	0.0701765	0.970947	1.93967	0.0554365	0.939899	-3.94978
ZNF732	-0.0583305	0.832495	-1.93921	0.0554932	0.939899	-3.9505
MIR665	-0.101248	0.9774	-1.93915	0.0555012	0.939899	-3.9506
LOC400043	-0.0603987	1.07451	-1.9388	0.0555438	0.939899	-3.95114
ASIC2	-0.0656682	1.08084	-1.93873	0.0555528	0.939899	-3.95126
ZNF396	-0.0730736	1.28554	-1.93829	0.0556072	0.939899	-3.95195
MIR522	-0.0797383	0.901993	-1.93772	0.0556781	0.939899	-3.95285
NAT8B	-0.165744	2.75711	-1.93701	0.0557664	0.939899	-3.95397
TRAPPC4	0.0845521	1.566	1.93698	0.0557696	0.939899	-3.95401
MRPL16	0.101205	2.57905	1.93657	0.0558205	0.939899	-3.95465
NUB1	0.179164	4.3624	1.93594	0.0558991	0.939899	-3.95565
SLBP	-0.143014	4.53621	-1.93575	0.0559226	0.939899	-3.95594
CLPP	-0.140068	3.09713	-1.93565	0.0559353	0.939899	-3.9561
IGLV2-18	0.165093	2.33327	1.93536	0.0559714	0.939899	-3.95656
LPA	-0.108525	1.14693	-1.93482	0.0560381	0.939899	-3.9574
FAM181B	-0.0743866	1.21474	-1.93482	0.0560386	0.939899	-3.9574
LOC100506258	0.0865626	1.54937	1.93471	0.0560522	0.939899	-3.95758
CCR10	-0.0778257	1.20211	-1.93446	0.0560829	0.939899	-3.95796
SLC44A3	0.0485181	0.953851	1.93436	0.0560958	0.939899	-3.95812
C6orf52	0.0514755	0.841558	1.93415	0.0561213	0.939899	-3.95844
RNF148	0.0597518	0.824848	1.93413	0.0561238	0.939899	-3.95848
MIR548AA1	0.104123	0.892255	1.93396	0.0561446	0.939899	-3.95874
SZT2-AS1	-0.102013	1.49845	-1.93393	0.0561489	0.939899	-3.95879
GAL3ST2	-0.1047	1.38951	-1.93329	0.0562294	0.939899	-3.9598
ATP6V0A4	-0.080364	1.33196	-1.9331	0.0562524	0.939899	-3.96009
SNORD114-14	-0.118878	1.07037	-1.93298	0.056267	0.939899	-3.96027
CDC25A	-0.0544155	1.09043	-1.93253	0.0563239	0.939899	-3.96099
MIR601	0.211362	2.73444	1.93226	0.056358	0.939899	-3.96141
PRDX5	-0.198947	4.38495	-1.93225	0.0563593	0.939899	-3.96143
EXOSC7	0.120018	2.05086	1.93216	0.0563701	0.939899	-3.96157
HS3ST6	-0.0764001	0.899673	-1.9321	0.0563782	0.939899	-3.96167
C12orf5	0.149599	2.66383	1.93157	0.0564437	0.939899	-3.96249
LOC401480	-0.0939808	1.84955	-1.93147	0.0564563	0.939899	-3.96264
VCPIP1	0.106359	5.12371	1.93119	0.0564915	0.939899	-3.96308
RHOT2	-0.118705	3.18755	-1.93068	0.056556	0.939899	-3.96389
PDE12	0.132684	1.88124	1.93062	0.0565633	0.939899	-3.96398
MIR3189	0.0988605	0.971862	1.93061	0.0565639	0.939899	-3.96399
ZNF556	-0.0712485	1.07617	-1.93024	0.0566111	0.939899	-3.96457
NDUFA4L2	-0.111402	1.26918	-1.93018	0.0566177	0.939899	-3.96466
KPNA6	0.210354	4.58836	1.92978	0.0566687	0.939899	-3.96529
MYBPH	0.105605	1.63078	1.92965	0.0566848	0.939899	-3.96549
PSMD2	0.142184	2.8956	1.92908	0.0567571	0.94012	-3.96639
MYO16-AS1	0.0810663	0.985242	1.92845	0.0568357	0.94012	-3.96737
SLC1A1	-0.0640479	1.05599	-1.9282	0.0568675	0.94012	-3.96776
RNF222	0.0935959	1.79769	1.9274	0.0569686	0.94012	-3.96901
TWISTNB	-0.101779	1.34705	-1.92734	0.0569756	0.94012	-3.9691
HEATR6	0.16803	3.26092	1.9271	0.0570059	0.94012	-3.96948
C14orf57	-0.06399	0.86828	-1.92657	0.0570733	0.94012	-3.97031
LOC100505725	0.0772863	1.38134	1.92518	0.0572487	0.94012	-3.97247
CTBP1-AS1	-0.0814952	1.67247	-1.92518	0.0572492	0.94012	-3.97248
CLEC4GP1	-0.111335	1.18896	-1.92472	0.0573076	0.94012	-3.9732
BCL2L10	-0.0716625	1.19179	-1.92307	0.0575179	0.94012	-3.97578
BANP	0.144411	2.66777	1.92234	0.0576101	0.94012	-3.97691
MIR4274	-0.120443	1.16457	-1.92228	0.0576178	0.94012	-3.977
ABHD14A-ACY1	-0.0659993	1.63892	-1.92216	0.0576338	0.94012	-3.97719
ALX4	-0.0957023	1.47378	-1.92213	0.057637	0.94012	-3.97723
CHAF1B	-0.0653426	1.71002	-1.92178	0.0576813	0.94012	-3.97778
MIR425	-0.119275	1.4374	-1.92173	0.0576876	0.94012	-3.97785
ART1	-0.0958706	1.63203	-1.92109	0.0577692	0.94012	-3.97885
GAS2L1	-0.0992958	1.42668	-1.92098	0.0577833	0.94012	-3.97902
MIR4776-2	-0.0842838	0.992243	-1.92066	0.0578242	0.94012	-3.97952
C2orf55	-0.0642683	1.37306	-1.92052	0.0578422	0.94012	-3.97974
ZNF558	0.127929	1.55821	1.91948	0.057976	0.94012	-3.98136
SLC38A6	0.0891915	1.68456	1.91942	0.0579835	0.94012	-3.98146
VMAC	-0.0995386	2.40857	-1.9191	0.0580244	0.94012	-3.98195
RTP3	0.0826805	1.31947	1.91901	0.0580364	0.94012	-3.9821
TCEAL8	-0.0979781	2.05662	-1.91882	0.0580605	0.94012	-3.98239
IGLC7	0.312711	2.55884	1.91872	0.0580729	0.94012	-3.98254
TEX29	-0.0917349	1.70825	-1.91808	0.0581556	0.94012	-3.98354
SRRM5	-0.0739478	1.39094	-1.9178	0.0581912	0.94012	-3.98397
ZNF281	-0.157329	4.06838	-1.91758	0.0582193	0.94012	-3.98431
CST6	-0.117897	1.89983	-1.91694	0.058302	0.94012	-3.98531
ANKRD50	0.124784	2.152	1.91674	0.0583275	0.94012	-3.98562
TDGF1	0.063003	0.978227	1.91671	0.0583317	0.94012	-3.98567
KRTAP6-2	-0.0884863	1.26667	-1.91654	0.0583532	0.94012	-3.98593
NLRP10	-0.0660996	1.22391	-1.9164	0.058371	0.94012	-3.98615
PGBD1	-0.0806676	1.08378	-1.91614	0.0584052	0.94012	-3.98656
CDADC1	0.12602	2.59475	1.91585	0.0584427	0.94012	-3.98701
MRPL11	0.0831947	1.61769	1.91534	0.0585087	0.94012	-3.9878
TIMM22	-0.110945	2.84942	-1.91519	0.0585274	0.94012	-3.98803
LAMB2P1	-0.0640714	1.09317	-1.91513	0.0585354	0.94012	-3.98813
LOC100653270	-0.0646355	1.31203	-1.915	0.0585522	0.94012	-3.98833
UROD	0.112727	2.39026	1.91493	0.058561	0.94012	-3.98843
FKBP9L	-0.0960698	1.38052	-1.91477	0.0585825	0.94012	-3.98869
OR10V1	-0.0692905	0.777426	-1.9141	0.0586682	0.94012	-3.98972
ALKBH4	-0.0907353	1.39669	-1.91405	0.0586749	0.94012	-3.9898
CENPBD1	-0.113538	1.9682	-1.91385	0.0587005	0.94012	-3.99011
CCZ1	0.16998	2.55842	1.91373	0.0587163	0.94012	-3.9903
MIR302E	0.0454886	0.723945	1.91369	0.058722	0.94012	-3.99037
CLEC11A	-0.123849	2.64278	-1.91286	0.0588288	0.94012	-3.99164
MYC	-0.111882	3.07229	-1.91284	0.0588324	0.94012	-3.99169
PRSS42	0.0571479	1.0527	1.91282	0.0588341	0.94012	-3.99171
CERS4	-0.0905039	1.73179	-1.91253	0.0588723	0.94012	-3.99216
NIPSNAP3A	0.16099	2.76652	1.91247	0.0588794	0.94012	-3.99225
GSX2	-0.107438	1.48648	-1.91221	0.0589139	0.94012	-3.99266
ALOX12P2	-0.0614365	1.24651	-1.91148	0.0590089	0.94012	-3.9938
RUFY3	0.154169	2.68396	1.91148	0.059009	0.94012	-3.9938
KDM4A	0.148021	3.58051	1.9111	0.0590583	0.94012	-3.99438
TAS2R46	-0.21003	1.44293	-1.91086	0.0590893	0.94012	-3.99475
KRT18	-0.0725667	1.14072	-1.91047	0.05914	0.94012	-3.99536
GFRA1	-0.0986314	1.53586	-1.90993	0.0592101	0.94012	-3.99619
ZNF44	0.146683	1.99203	1.90964	0.0592484	0.94012	-3.99664
WDR24	-0.0931091	1.85775	-1.90959	0.0592542	0.94012	-3.99671
BRWD1-IT2	-0.081935	1.29952	-1.90955	0.0592599	0.94012	-3.99678
DARS	0.13031	4.67818	1.90935	0.0592857	0.94012	-3.99709
ZNF14	-0.166238	1.39805	-1.90886	0.0593508	0.94012	-3.99786
IGFLR1	0.137507	3.62645	1.90849	0.0593991	0.94012	-3.99843
C12orf70	0.0558604	0.975019	1.90837	0.0594144	0.94012	-3.99861
ZNF749	-0.0824635	1.12807	-1.90751	0.0595274	0.94012	-3.99995
FCRLA	0.08722	1.50397	1.90725	0.0595609	0.94012	-4.00034
MIR4527	0.0574427	0.759529	1.90705	0.0595876	0.94012	-4.00066
MED9	-0.109124	2.04164	-1.90704	0.0595886	0.94012	-4.00067
LY9	-0.134486	2.94382	-1.90671	0.0596321	0.94012	-4.00118
FGF14-AS1	-0.0707084	1.04767	-1.9067	0.059633	0.94012	-4.00119
FAM108A1	-0.110245	1.37436	-1.9064	0.0596729	0.94012	-4.00167
GPR17	-0.0672592	1.125	-1.90639	0.0596737	0.94012	-4.00167
OR2AT4	-0.0602564	0.849098	-1.90626	0.0596904	0.94012	-4.00187
GPR64	-0.0503263	1.06472	-1.90614	0.0597072	0.94012	-4.00207
RN5S442	-0.210894	1.65132	-1.90612	0.0597088	0.94012	-4.00209
UQCRC2	0.120134	5.31924	1.90607	0.0597159	0.94012	-4.00217
SERPINE3	-0.0628939	1.17696	-1.9057	0.0597648	0.94012	-4.00275
MSL2	-0.0725007	5.88619	-1.90546	0.0597958	0.94012	-4.00311
PYY	-0.100528	1.52802	-1.90471	0.0598945	0.94012	-4.00427
SNORD12B	0.248244	4.21912	1.90437	0.0599391	0.94012	-4.00479
LRFN4	-0.0907611	1.35318	-1.90427	0.0599526	0.94012	-4.00495
RPSAP52	0.149103	1.37332	1.90311	0.0601054	0.94012	-4.00674
LOC338758	-0.172001	2.25865	-1.90299	0.0601213	0.94012	-4.00693
CD200R1L	-0.0494223	0.699221	-1.90297	0.0601245	0.94012	-4.00696
KRT37	-0.111665	1.3475	-1.90292	0.0601306	0.94012	-4.00704
FOXI2	-0.0733894	1.33414	-1.90267	0.0601638	0.94012	-4.00742
LTA	-0.102348	2.10972	-1.90252	0.0601836	0.94012	-4.00765
RN5S121	0.0644493	0.649513	1.9022	0.0602257	0.94012	-4.00815
RN5S394	-0.0907114	1.22923	-1.90206	0.0602444	0.94012	-4.00836
PGRMC1	-0.163378	4.25663	-1.90191	0.0602645	0.94012	-4.0086
TUT1	-0.069747	1.42978	-1.90164	0.0603008	0.94012	-4.00902
IRX1	-0.105932	1.32494	-1.90152	0.060316	0.94012	-4.0092
ADRBK2	0.288737	4.64299	1.90127	0.0603499	0.94012	-4.00959
RAX2	-0.0871829	1.43287	-1.9012	0.0603587	0.94012	-4.0097
C2orf88	-0.129791	2.03345	-1.90091	0.0603964	0.94012	-4.01013
MIR124-1	-0.0758067	1.4593	-1.90088	0.0604007	0.94012	-4.01019
SLC7A9	-0.0649745	1.14416	-1.89996	0.0605236	0.94022	-4.01161
LINC00578	-0.0539577	0.929917	-1.89906	0.0606427	0.94022	-4.01299
AQP3	-0.102497	1.86887	-1.89886	0.0606688	0.94022	-4.0133
SMAGP	-0.123685	2.08278	-1.89816	0.0607622	0.94022	-4.01438
IGFN1	-0.0839195	1.22242	-1.89805	0.0607767	0.94022	-4.01454
LOC100132352	0.274849	3.1206	1.89776	0.0608164	0.94022	-4.015
MST1P2	-0.15208	1.78918	-1.89718	0.0608936	0.94022	-4.01589
NCKAP5-IT1	0.050899	0.768674	1.89684	0.0609393	0.94022	-4.01642
FASTK	-0.126146	2.18666	-1.89652	0.0609818	0.94022	-4.01691
SLC25A30	0.116034	2.21156	1.89629	0.061012	0.94022	-4.01726
C19orf26	-0.112737	1.44471	-1.89628	0.0610143	0.94022	-4.01728
RPL26L1	-0.0660335	1.23574	-1.8961	0.0610385	0.94022	-4.01756
ZNF646	-0.119388	2.47608	-1.89589	0.0610665	0.94022	-4.01788
KIAA1456	-0.0447704	1.01152	-1.89531	0.0611438	0.94022	-4.01877
ENKUR	-0.0927136	1.53142	-1.89509	0.0611728	0.94022	-4.0191
DIAPH2	0.185235	5.05215	1.89489	0.0612003	0.94022	-4.01942
C2orf69	-0.092725	1.45253	-1.89471	0.0612246	0.94022	-4.0197
HIST1H2BC	-0.108296	2.22602	-1.89419	0.0612936	0.94022	-4.02049
ZNF430	0.181932	2.79261	1.89416	0.0612975	0.94022	-4.02053
CNDP2	0.109717	1.89143	1.89356	0.0613783	0.94022	-4.02146
MIR4756	-0.158822	2.30729	-1.89356	0.0613787	0.94022	-4.02146
ATOH1	-0.0930777	1.18966	-1.89352	0.0613843	0.94022	-4.02153
LOC283761	-0.0656915	1.07023	-1.89298	0.0614569	0.94022	-4.02236
MIR205	-0.0511075	1.13268	-1.89282	0.0614783	0.94022	-4.0226
VCY	-0.0700467	1.44559	-1.89278	0.0614838	0.94022	-4.02266
SEC24A	0.123364	4.56276	1.89248	0.0615244	0.94022	-4.02313
UNC13A	-0.0604217	1.20457	-1.89234	0.0615428	0.94022	-4.02334
DRD1	-0.0689527	1.09976	-1.89203	0.0615849	0.94022	-4.02382
ANKRD54	-0.0776604	1.60722	-1.89189	0.061604	0.94022	-4.02403
IZUMO4	-0.109299	1.91375	-1.89188	0.0616053	0.94022	-4.02405
LIMD2	-0.142734	6.72696	-1.89054	0.0617852	0.94022	-4.0261
CYP2A7	-0.17731	2.35868	-1.89035	0.0618109	0.94022	-4.02639
NAP1L5	-0.105358	1.69212	-1.88902	0.0619921	0.94022	-4.02844
IGKV1ORY-1	-0.112953	0.960855	-1.88894	0.0620021	0.94022	-4.02855
FLJ45983	-0.0663598	1.05387	-1.88891	0.0620065	0.94022	-4.0286
ZNF630	-0.0553791	1.59456	-1.88862	0.0620457	0.94022	-4.02905
ZBTB7C	0.0657391	1.12501	1.88858	0.0620506	0.94022	-4.0291
FRMD5	-0.0709949	1.19368	-1.88857	0.0620531	0.94022	-4.02913
MAFF	-0.0918141	1.3703	-1.88829	0.0620906	0.94022	-4.02955
RNASE2	0.402789	6.88642	1.88763	0.0621799	0.94022	-4.03056
ZNF826P	0.12614	1.35227	1.8874	0.0622119	0.94022	-4.03092
LOC100505644	-0.121015	2.09576	-1.88736	0.0622164	0.94022	-4.03097
MIR3190	0.155134	1.42373	1.88724	0.0622333	0.94022	-4.03116
OR5C1	0.116775	2.55221	1.88707	0.062256	0.94022	-4.03142
CMA1	0.0717187	1.00329	1.88689	0.0622805	0.94022	-4.0317
SIPA1L3	0.139209	3.63125	1.88651	0.0623324	0.94022	-4.03228
B2M	0.0701634	9.22228	1.88616	0.0623802	0.94022	-4.03282
RNU6-64	-0.053567	0.833927	-1.88595	0.0624091	0.94022	-4.03314
C1QL1	-0.102991	1.39351	-1.88566	0.062449	0.94022	-4.03359
NT5C3L	-0.122731	2.43542	-1.88558	0.0624593	0.94022	-4.0337
SNORA65	0.648838	5.92201	1.88524	0.0625052	0.94022	-4.03422
MIR3137	-0.233618	2.30689	-1.88513	0.0625212	0.94022	-4.0344
RN5S148	-0.154558	2.30807	-1.88439	0.0626216	0.94022	-4.03552
IDO1	0.110435	1.25849	1.88408	0.062664	0.94022	-4.036
NMRK2	-0.0914987	1.35344	-1.88368	0.0627194	0.94022	-4.03662
CD83	-0.104667	2.30684	-1.88308	0.0628012	0.94022	-4.03753
TMEM40	-0.160505	2.20315	-1.88288	0.0628285	0.94022	-4.03784
RPS26	-0.082225	1.26005	-1.88262	0.062865	0.94022	-4.03824
OR3A4P	-0.0961868	1.60934	-1.88236	0.0629006	0.94022	-4.03864
ZNF418	-0.0908192	1.14659	-1.88235	0.0629016	0.94022	-4.03865
SOX18	-0.0998803	1.49669	-1.88102	0.0630841	0.94022	-4.04068
GP9	-0.150707	1.43027	-1.88077	0.0631183	0.94022	-4.04106
LOC100507624	-0.0425147	0.676804	-1.87984	0.0632466	0.94022	-4.04248
C12orf51	0.141957	4.24344	1.87971	0.0632643	0.94022	-4.04268
ERF	-0.125087	2.17481	-1.87931	0.0633201	0.94022	-4.0433
USP36	-0.118162	3.51707	-1.8787	0.063404	0.94022	-4.04422
LINC00311	-0.0496443	0.976034	-1.87858	0.0634207	0.94022	-4.04441
PRAMEF7	-0.0747099	1.49386	-1.8785	0.0634323	0.94022	-4.04454
ZMYM6	0.0922761	4.90673	1.87842	0.0634424	0.94022	-4.04465
IGJ	0.36876	2.55156	1.8784	0.0634453	0.94022	-4.04468
ALKBH5	0.103095	2.52422	1.87834	0.0634541	0.94022	-4.04478
KLHL32	0.0597604	1.128	1.87796	0.0635067	0.94022	-4.04536
GUCY1B2	-0.0584895	0.987583	-1.87784	0.0635224	0.94022	-4.04553
TESK2	0.118149	2.50902	1.8775	0.0635702	0.94022	-4.04606
IGHG3	0.132475	1.84067	1.87742	0.0635813	0.94022	-4.04618
PPP1R12C	-0.108623	2.89962	-1.87733	0.0635932	0.94022	-4.04631
RN5S438	0.074591	0.693915	1.87683	0.0636626	0.94022	-4.04708
CRYM	-0.0688812	1.41233	-1.8768	0.0636665	0.94022	-4.04712
RASA3-IT1	0.111659	1.88304	1.87678	0.0636702	0.94022	-4.04716
PPIEL	0.080962	1.2101	1.87662	0.0636926	0.94022	-4.04741
MMRN1	-0.147882	1.50459	-1.87584	0.0638008	0.94022	-4.04859
CAMSAP2	-0.0855407	1.24549	-1.87583	0.0638012	0.94022	-4.0486
KSR1	0.144467	3.69235	1.87563	0.0638293	0.94022	-4.04891
MIR548Y	0.0971165	1.17844	1.87539	0.0638631	0.94022	-4.04928
RN5S203	-0.157016	2.05788	-1.87524	0.0638839	0.94022	-4.04951
NACA	0.11674	2.76821	1.87513	0.0638996	0.94022	-4.04968
KCNK4	-0.0796531	1.47073	-1.87498	0.0639202	0.94022	-4.0499
PPP1R3F	-0.0881844	2.28321	-1.87494	0.0639258	0.94022	-4.04996
MIR1302-6	-0.0713262	0.856252	-1.87478	0.063947	0.94022	-4.0502
ZAR1L	0.0506869	1.05657	1.87469	0.0639602	0.94022	-4.05034
PRUNE	-0.116365	3.72589	-1.87455	0.0639803	0.94022	-4.05056
ZNF275	-0.0853629	1.80534	-1.87442	0.0639976	0.94022	-4.05075
LOC401561	0.081351	1.40903	1.87429	0.0640164	0.94022	-4.05095
MED11	-0.115687	2.29646	-1.87417	0.064032	0.94022	-4.05113
MIR3130-2	-0.130457	1.43115	-1.87399	0.0640576	0.94022	-4.05141
NAA10	-0.0751423	2.02834	-1.8738	0.0640843	0.94022	-4.0517
IGHV4-31	0.12727	2.3304	1.87313	0.0641773	0.94022	-4.05271
TIMM23	0.154956	3.67641	1.87307	0.0641857	0.94022	-4.0528
LOC100506713	0.16555	2.92137	1.87283	0.0642201	0.94022	-4.05318
PRSS30P	0.0680284	1.24487	1.87251	0.0642643	0.94022	-4.05366
TXNDC15	0.131117	3.79373	1.87246	0.0642711	0.94022	-4.05373
MAX	-0.0810609	6.05475	-1.87241	0.0642786	0.94022	-4.05382
LOC100506352	-0.0561623	0.959521	-1.8719	0.0643492	0.94022	-4.05458
SHC4	-0.0509867	0.979865	-1.8718	0.0643633	0.94022	-4.05474
SHANK2-AS1	-0.0932027	1.42214	-1.87176	0.0643691	0.94022	-4.0548
C4orf45	0.0605776	1.02589	1.87154	0.0643998	0.94022	-4.05513
IKBKG	-0.0904608	1.44681	-1.8713	0.0644331	0.94022	-4.0555
RNU5E-5P	0.0833685	0.692814	1.87118	0.0644504	0.94022	-4.05568
LINC00251	-0.0670728	1.08191	-1.87041	0.0645581	0.94022	-4.05685
SMCR7L	0.0960318	1.96511	1.87041	0.0645587	0.94022	-4.05686
SEC16B	0.0342582	1.00772	1.8704	0.064559	0.94022	-4.05686
PHACTR4	0.114128	4.07504	1.86946	0.064691	0.941246	-4.05829
LOC100505490	-0.0852159	1.12611	-1.86923	0.0647239	0.941246	-4.05865
ZNF707	-0.0785748	1.23759	-1.86886	0.0647759	0.941246	-4.05921
LOC100127967	-0.0814187	1.28692	-1.86884	0.0647792	0.941246	-4.05924
C9orf69	-0.100127	2.51202	-1.8685	0.0648265	0.941389	-4.05975
KNDC1	-0.0668598	1.47185	-1.86689	0.0650533	0.942314	-4.0622
FBXO3	0.103604	2.45188	1.86644	0.0651177	0.942314	-4.06289
KRT25	-0.0582166	0.955636	-1.8656	0.065236	0.942314	-4.06416
LINC00307	0.0828829	0.967063	1.86528	0.0652817	0.942314	-4.06465
RAMP3	-0.099329	1.66183	-1.86521	0.0652918	0.942314	-4.06476
TMEM170A	0.149472	3.05107	1.86516	0.0652986	0.942314	-4.06483
MIR134	-0.159704	2.47067	-1.86511	0.0653053	0.942314	-4.0649
ECE2	-0.0670788	1.29056	-1.86476	0.0653547	0.942314	-4.06543
SLC22A3	-0.0512398	0.918637	-1.86446	0.0653981	0.942314	-4.06589
SHISA8	-0.103279	1.65077	-1.86436	0.065412	0.942314	-4.06604
TANC2	-0.161536	2.63788	-1.86422	0.0654312	0.942314	-4.06625
MIR3944	-0.136388	2.16178	-1.86399	0.0654644	0.942314	-4.0666
MIR1231	-0.202122	2.88909	-1.86338	0.0655501	0.942314	-4.06752
MLF2	-0.0854946	2.99007	-1.86279	0.0656346	0.942314	-4.06842
URB2	-0.0727129	1.31148	-1.86234	0.0656988	0.942314	-4.0691
SCGB1C1	-0.0805135	1.2619	-1.86232	0.0657016	0.942314	-4.06913
WNT6	-0.120257	1.27797	-1.86224	0.0657127	0.942314	-4.06925
MIR3689D2	-0.193521	1.92984	-1.86175	0.0657822	0.942314	-4.06999
AHR	0.140359	6.27181	1.86174	0.065784	0.942314	-4.07
OR6K6	0.0511293	0.915654	1.86168	0.0657927	0.942314	-4.0701
C17orf50	-0.0912035	1.29618	-1.86118	0.0658645	0.942314	-4.07086
S100A12	0.342827	8.41134	1.86088	0.0659067	0.942314	-4.07131
CD22	0.209837	3.8285	1.86042	0.0659725	0.942314	-4.072
SELV	-0.0950926	1.4604	-1.86001	0.066031	0.942314	-4.07262
LOC84931	-0.0765365	1.01218	-1.85993	0.0660427	0.942314	-4.07275
LINC00441	-0.0592267	1.05642	-1.85928	0.0661361	0.942314	-4.07373
NXF4	-0.0573411	0.927494	-1.85924	0.066141	0.942314	-4.07379
POU5F1P4	0.181407	2.95431	1.85913	0.0661568	0.942314	-4.07395
UNC93A	-0.0733287	1.13439	-1.8587	0.0662192	0.942314	-4.07461
WSB2	-0.143726	5.04788	-1.85858	0.0662358	0.942314	-4.07479
EFCAB5	-0.0748513	1.07529	-1.85828	0.0662793	0.942314	-4.07525
SVOPL	-0.0474127	0.916681	-1.85801	0.0663173	0.942314	-4.07565
LOC100505626	-0.0673469	1.14863	-1.85797	0.0663233	0.942314	-4.07571
ELFN1	-0.112945	1.37887	-1.85746	0.0663969	0.942314	-4.07648
USP9Y	0.0549295	0.906493	1.85737	0.0664093	0.942314	-4.07661
AP5S1	-0.0755078	1.30194	-1.85669	0.0665078	0.942314	-4.07765
LMAN2L	-0.0871885	1.84581	-1.8563	0.0665639	0.942314	-4.07824
NPHS1	-0.0918209	1.26275	-1.85628	0.0665664	0.942314	-4.07826
LRRC37A11P	-0.110442	1.21358	-1.85586	0.0666268	0.942314	-4.0789
BOLA3-AS1	-0.0653643	1.13962	-1.85584	0.0666289	0.942314	-4.07892
ENAM	-0.0592477	1.06837	-1.85561	0.0666619	0.942314	-4.07926
SH3PXD2B	0.0619705	1.30167	1.85494	0.0667591	0.942314	-4.08028
ID3	-0.0842992	1.18567	-1.85442	0.0668346	0.942314	-4.08107
PBOV1	-0.0447915	0.759369	-1.85431	0.0668508	0.942314	-4.08124
DLG5	-0.0680848	1.34759	-1.85423	0.0668613	0.942314	-4.08135
C7orf66	0.0552318	0.846422	1.85387	0.0669142	0.942314	-4.0819
C20orf201	-0.1194	1.65721	-1.85384	0.0669179	0.942314	-4.08194
MORN2	-0.0534453	0.867433	-1.85383	0.0669195	0.942314	-4.08196
MPPED1	-0.0637417	1.26217	-1.85377	0.0669283	0.942314	-4.08205
RAB3B	-0.0905302	1.40652	-1.85365	0.0669459	0.942314	-4.08223
SPRR2C	-0.0811444	1.02866	-1.85357	0.0669564	0.942314	-4.08234
PRKAB2	0.124162	2.66735	1.85354	0.0669612	0.942314	-4.08239
COL6A4P2	-0.0474263	1.13626	-1.85346	0.0669734	0.942314	-4.08252
MIR181A2HG	-0.0683497	1.08725	-1.85322	0.0670082	0.942314	-4.08288
RASL12	-0.0914566	1.10374	-1.85313	0.0670207	0.942314	-4.08301
CA5BP1	-0.107825	2.27865	-1.85308	0.0670286	0.942314	-4.08309
NDUFS2	0.0857439	2.60869	1.85259	0.0670992	0.942314	-4.08383
CXXC5	-0.091467	2.57948	-1.85243	0.0671228	0.942314	-4.08407
FAM162B	-0.0640704	1.35294	-1.85227	0.0671448	0.942314	-4.0843
GNA15	0.089167	2.83755	1.8518	0.0672129	0.942314	-4.08501
STGC3	0.0623782	1.00891	1.8507	0.0673736	0.942314	-4.08668
YPEL5	-0.0876023	3.752	-1.85068	0.0673765	0.942314	-4.08671
TMEFF2	0.0474701	0.856529	1.85065	0.0673799	0.942314	-4.08674
RNU7-58P	0.0990067	0.98738	1.85019	0.0674468	0.942314	-4.08743
MIR550A3	0.140579	1.3648	1.84971	0.067517	0.942314	-4.08816
CTDNEP1	-0.0967996	4.88017	-1.84919	0.0675925	0.942314	-4.08894
LOC100507603	-0.0643591	0.917252	-1.84901	0.0676192	0.942314	-4.08921
RN5S293	-0.0855297	1.39398	-1.84893	0.0676308	0.942314	-4.08933
LOC100129973	-0.0628581	1.10024	-1.84888	0.0676391	0.942314	-4.08942
MIR4425	-0.0442615	0.801274	-1.84876	0.0676563	0.942314	-4.0896
PPP1R36	0.0653405	0.94173	1.84873	0.0676604	0.942314	-4.08964
RNF165	-0.0478839	1.29119	-1.84869	0.067666	0.942314	-4.0897
C3orf18	-0.0845049	1.41892	-1.8484	0.067708	0.942314	-4.09013
KBTBD6	-0.129895	1.61088	-1.8483	0.0677233	0.942314	-4.09029
MUC16	-0.0676696	1.40381	-1.84807	0.0677562	0.942314	-4.09063
SLC35D3	-0.0830028	1.38171	-1.84795	0.067774	0.942314	-4.09081
TBX10	-0.0871908	1.34862	-1.84793	0.0677767	0.942314	-4.09084
NSUN5P2	-0.105865	1.77422	-1.84728	0.0678718	0.942964	-4.09181
MIR185	-0.135047	3.79577	-1.84677	0.0679471	0.942964	-4.09259
LINC00310	-0.0714676	1.25054	-1.84673	0.0679532	0.942964	-4.09265
EML1	0.0557242	1.14973	1.84645	0.0679934	0.942964	-4.09306
HOXC13	-0.0826651	1.1707	-1.84598	0.0680631	0.942964	-4.09378
SLC25A20	0.0973387	2.77122	1.84588	0.0680772	0.942964	-4.09392
CPXM1	-0.0738811	1.40038	-1.84582	0.0680861	0.942964	-4.09401
ZNF830	0.127607	3.3629	1.84527	0.068166	0.943292	-4.09483
RCBTB1	0.130196	2.1453	1.84515	0.0681848	0.943292	-4.09502
CRYAA	-0.0853279	1.49724	-1.84372	0.0683942	0.944815	-4.09716
RPL39L	0.0900299	1.02808	1.84307	0.0684901	0.944815	-4.09814
TXNDC11	0.113812	3.05258	1.84306	0.0684913	0.944815	-4.09815
XCL2	-0.150353	1.43419	-1.84263	0.0685545	0.944815	-4.09879
IQCB1	0.107979	2.36706	1.84253	0.0685692	0.944815	-4.09894
LOC100506813	-0.0802316	1.16733	-1.84252	0.0685707	0.944815	-4.09896
MTRNR2L8	-0.145836	5.95287	-1.84203	0.0686439	0.944815	-4.0997
MIR518B	-0.140533	1.53472	-1.84189	0.0686643	0.944815	-4.09991
CXCR4	-0.0981358	8.39889	-1.84186	0.0686692	0.944815	-4.09996
DRAM1	0.0953517	1.81114	1.84124	0.0687608	0.944815	-4.10089
MIR101-1	0.127743	1.6444	1.84097	0.0688001	0.944815	-4.10128
LOC100506494	0.060367	1.07913	1.84089	0.0688125	0.944815	-4.10141
LINC00488	0.0567423	0.959509	1.84019	0.0689156	0.944815	-4.10245
RHEBL1	-0.0569382	1.15737	-1.83974	0.0689819	0.944815	-4.10312
ARHGAP11B	0.125056	1.33401	1.8397	0.0689883	0.944815	-4.10319
C10orf114	-0.0722427	1.06156	-1.83938	0.0690357	0.944815	-4.10367
HPYR1	0.0523661	0.829418	1.8391	0.0690777	0.944815	-4.10409
AK7	-0.0486713	1.04459	-1.83904	0.0690871	0.944815	-4.10418
OR14C36	0.0695117	1.037	1.83902	0.0690898	0.944815	-4.10421
TSHZ3	0.196901	3.19566	1.83874	0.0691309	0.944815	-4.10463
GRIK5	-0.0688819	1.57769	-1.83845	0.0691745	0.944815	-4.10506
LOC100506474	0.0414035	0.81046	1.83836	0.0691874	0.944815	-4.10519
LAMA1	-0.047848	1.15214	-1.83829	0.0691971	0.944815	-4.10529
SEMA6C	-0.0828963	1.21832	-1.83829	0.0691979	0.944815	-4.1053
HBA1	-0.082126	10.0671	-1.83804	0.0692346	0.944815	-4.10567
SHROOM4	0.0538605	1.24599	1.83769	0.0692874	0.945023	-4.1062
NAV1	-0.0580654	1.24219	-1.83633	0.0694891	0.946772	-4.10822
MIR3690	0.145028	1.4494	1.83606	0.0695306	0.946772	-4.10864
LOC100505942	-0.175561	3.13696	-1.83582	0.0695663	0.946772	-4.109
SNORA21	0.177178	3.04202	1.83582	0.0695663	0.946772	-4.109
LOC340017	-0.0475957	0.751366	-1.83491	0.0697014	0.947702	-4.11035
MAPKAPK5	0.130691	4.3737	1.83468	0.0697366	0.947702	-4.1107
ADRA1D	0.0916334	1.63033	1.83422	0.0698046	0.947702	-4.11138
FBXW11	0.121332	3.28698	1.8342	0.0698074	0.947702	-4.11141
TRIM14	0.129946	2.90161	1.83348	0.0699159	0.947702	-4.11249
TSEN54	-0.102209	1.7876	-1.83317	0.0699623	0.947702	-4.11295
TRAF3IP2	0.056383	1.38161	1.83286	0.0700083	0.947702	-4.11341
FLG-AS1	-0.0427769	1.0212	-1.83255	0.0700563	0.947702	-4.11388
HTR4	-0.0674564	1.06712	-1.83204	0.0701322	0.947702	-4.11464
WDR70	0.103345	2.76848	1.83197	0.0701426	0.947702	-4.11474
GRIK1-AS2	0.0959446	1.55151	1.83193	0.0701487	0.947702	-4.1148
PSKH1	-0.113837	2.03939	-1.83145	0.0702213	0.947702	-4.11552
PPP1R35	-0.169425	2.45464	-1.83142	0.070226	0.947702	-4.11557
PARD3	-0.0682938	1.3044	-1.83053	0.0703602	0.947702	-4.11689
NBPF14	0.309747	6.14116	1.8305	0.0703646	0.947702	-4.11694
LOC100131392	-0.141632	1.66991	-1.83018	0.0704125	0.947702	-4.11741
KIRREL2	-0.0673148	1.35249	-1.83012	0.070422	0.947702	-4.11751
RNU6-63	-0.0601728	0.860737	-1.8298	0.0704694	0.947702	-4.11797
LEPR	-0.0907532	1.90862	-1.8295	0.0705147	0.947702	-4.11842
RNF214	0.0949147	2.04073	1.82942	0.0705268	0.947702	-4.11854
PTCHD3	-0.0499993	0.873823	-1.82922	0.0705577	0.947702	-4.11884
RNU7-25P	0.205176	1.7586	1.82899	0.0705918	0.947702	-4.11918
MIR1265	-0.0845092	0.882684	-1.82876	0.0706261	0.947702	-4.11952
HLA-DQB1-AS1	-0.0889406	1.56214	-1.8287	0.0706357	0.947702	-4.11961
KCTD19	-0.0710183	1.10279	-1.82855	0.0706588	0.947702	-4.11984
BDNF	-0.0573854	1.15066	-1.82818	0.0707145	0.947702	-4.12039
ANKRD27	0.127765	3.39384	1.82814	0.0707212	0.947702	-4.12045
PCK1	-0.0600829	1.03374	-1.828	0.0707419	0.947702	-4.12066
PRDX1	0.150516	3.80062	1.82791	0.0707557	0.947702	-4.12079
TAP1	0.127512	4.82157	1.82731	0.0708463	0.947702	-4.12168
TMEM173	0.0894312	2.31732	1.82675	0.0709315	0.947702	-4.12252
DDR1-AS1	0.0576128	1.29854	1.82655	0.0709621	0.947702	-4.12282
LOC100506293	-0.0721692	1.05834	-1.82623	0.0710108	0.947702	-4.12329
SEL1L2	0.0510839	1.1151	1.82619	0.0710164	0.947702	-4.12335
C19orf33	-0.116329	1.60536	-1.82619	0.071017	0.947702	-4.12336
MIR146A	0.0691454	1.33672	1.82586	0.0710658	0.947702	-4.12383
SLC34A3	0.0861155	1.34391	1.82586	0.0710659	0.947702	-4.12383
ART5	-0.0796464	1.44219	-1.82568	0.0710935	0.947702	-4.1241
SNORD90	0.169714	1.47671	1.82561	0.071105	0.947702	-4.12422
KRTAP9-1	-0.112072	1.15537	-1.8252	0.0711667	0.948022	-4.12482
IDH3A	0.0885003	1.4109	1.82469	0.0712447	0.948559	-4.12558
LOC100131131	0.210263	2.64428	1.82433	0.0712986	0.948574	-4.12611
CCNJ	0.0926777	1.54073	1.82405	0.071342	0.948574	-4.12653
COL28A1	-0.0641547	1.00374	-1.82388	0.0713685	0.948574	-4.12679
TMPRSS2	-0.0505134	1.02925	-1.82358	0.0714137	0.948574	-4.12723
MTHFD2	0.107499	2.84149	1.82334	0.0714511	0.948574	-4.12759
GPC5-AS2	-0.0576321	0.984549	-1.8232	0.0714723	0.948574	-4.1278
XPO7	0.167185	6.15777	1.82263	0.0715591	0.948652	-4.12864
AP3B2	-0.070562	1.3697	-1.82249	0.0715806	0.948652	-4.12885
GDF2	-0.0648236	1.09003	-1.82242	0.0715914	0.948652	-4.12895
SHARPIN	-0.149007	2.83027	-1.82145	0.0717402	0.949867	-4.1304
MRVI1-AS1	0.122895	1.48427	1.82072	0.0718513	0.949867	-4.13147
IGHD2-21	0.172794	4.92578	1.8207	0.0718546	0.949867	-4.1315
DCD	-0.0595423	0.895163	-1.82069	0.0718565	0.949867	-4.13152
TCFL5	-0.113009	2.28699	-1.82057	0.0718745	0.949867	-4.1317
AGPAT2	-0.0946341	2.03656	-1.82023	0.071927	0.949867	-4.1322
STC2	-0.0659541	1.30559	-1.81975	0.0720003	0.949867	-4.13291
CPSF2	0.192827	4.39386	1.81917	0.0720897	0.949867	-4.13377
NSF	0.165239	3.87198	1.81902	0.0721125	0.949867	-4.13399
VCAN	0.212811	7.16482	1.81899	0.0721167	0.949867	-4.13403
IGKV1-27	0.157543	1.43875	1.81865	0.0721693	0.949867	-4.13454
RASD1	-0.106244	1.86846	-1.81811	0.0722522	0.949867	-4.13534
PRCC	-0.0986424	2.11619	-1.81804	0.0722631	0.949867	-4.13544
SNORD111	0.327197	2.98927	1.81798	0.0722725	0.949867	-4.13553
MYO1G	0.138268	5.14587	1.81788	0.072288	0.949867	-4.13568
LOC728114	-0.0490026	0.85852	-1.8176	0.0723321	0.949867	-4.1361
LOC100506387	-0.0616778	0.88247	-1.81711	0.0724062	0.949867	-4.13681
GUCY1B3	-0.173584	3.10328	-1.81701	0.0724222	0.949867	-4.13697
RN5S346	0.154154	4.39198	1.81673	0.0724655	0.949867	-4.13738
PAK7	-0.0662001	0.991825	-1.81642	0.0725129	0.949867	-4.13784
THOP1	-0.082977	1.86633	-1.81619	0.0725484	0.949867	-4.13818
RN5-8S3	0.0600192	0.802127	1.81605	0.0725712	0.949867	-4.13839
PMCH	-0.0584364	0.729347	-1.8158	0.0726089	0.949867	-4.13876
RN5S480	-0.180755	1.14773	-1.81525	0.0726946	0.949867	-4.13957
LOC158435	-0.0602767	1.04315	-1.81452	0.0728076	0.949867	-4.14065
ZNF414	-0.0976819	2.00857	-1.81423	0.0728527	0.949867	-4.14108
BRP44	-0.138017	4.12258	-1.81406	0.0728794	0.949867	-4.14134
NDUFAF5	-0.066305	1.30587	-1.81387	0.0729091	0.949867	-4.14162
MAP1LC3A	-0.0790818	1.44107	-1.81384	0.072914	0.949867	-4.14167
PVRL3	-0.0838038	1.42185	-1.81355	0.0729578	0.949867	-4.14208
HOXD10	-0.0917872	1.43574	-1.8134	0.0729817	0.949867	-4.14231
PLEKHG4B	-0.0632507	1.26441	-1.81326	0.0730036	0.949867	-4.14252
PDE11A	0.0480471	0.925022	1.81322	0.07301	0.949867	-4.14258
DRAM2	0.141994	4.48467	1.81321	0.0730117	0.949867	-4.1426
TEX22	-0.0831258	1.9472	-1.81307	0.0730331	0.949867	-4.1428
DNASE1L1	-0.106236	2.85524	-1.81299	0.0730455	0.949867	-4.14292
HS2ST1	-0.141374	3.50521	-1.81257	0.0731102	0.949867	-4.14353
OAS1	0.30711	4.18279	1.81206	0.0731894	0.949867	-4.14428
RAB15	-0.0899219	1.71843	-1.81188	0.0732178	0.949867	-4.14455
ENPP3	-0.059948	1.05043	-1.81171	0.0732446	0.949867	-4.14481
PSG2	0.100067	1.12788	1.81121	0.0733232	0.949867	-4.14555
CTU2	-0.119008	2.02441	-1.81114	0.073333	0.949867	-4.14564
LOC100506624	-0.0869554	2.05107	-1.81107	0.0733451	0.949867	-4.14576
LINC00518	-0.0456975	0.969994	-1.81083	0.0733817	0.949867	-4.1461
PRTG	0.0440131	1.00706	1.81036	0.0734551	0.949867	-4.1468
GNA12	0.117835	2.75237	1.81003	0.0735062	0.949867	-4.14728
LOX	-0.0557881	1.25639	-1.80978	0.0735465	0.949867	-4.14766
LOC100506219	-0.089696	2.40035	-1.80976	0.0735486	0.949867	-4.14768
MIR124-2	-0.0952012	1.60534	-1.80956	0.07358	0.949867	-4.14797
SEZ6L2	-0.0641257	1.28211	-1.8095	0.0735892	0.949867	-4.14806
C10orf76	0.181296	3.40263	1.80903	0.0736638	0.949867	-4.14876
SIRT6	-0.120708	2.42893	-1.80876	0.0737057	0.949867	-4.14916
SH2D4A	-0.0758856	1.1315	-1.80858	0.0737339	0.949867	-4.14942
LOC100507117	0.236909	3.34597	1.80852	0.073744	0.949867	-4.14952
LOC340073	-0.0751496	1.30778	-1.80823	0.0737882	0.949867	-4.14993
TMED9	-0.078475	2.14963	-1.80816	0.0737992	0.949867	-4.15004
NOBOX	-0.0714752	1.23196	-1.80761	0.0738867	0.950057	-4.15086
POF1B	-0.0471238	0.809357	-1.80748	0.0739058	0.950057	-4.15104
LCN12	-0.0871615	1.61395	-1.80735	0.0739274	0.950057	-4.15124
RBFOX3	-0.0941595	1.5189	-1.80641	0.0740743	0.951459	-4.15262
HCFC1R1	-0.108224	2.0944	-1.80609	0.0741254	0.951516	-4.15309
MIR518E	-0.0874166	0.737767	-1.80563	0.0741967	0.951516	-4.15376
CXCL2	-0.108775	1.80961	-1.80542	0.0742306	0.951516	-4.15408
OPALIN	0.0834063	1.60663	1.80482	0.0743257	0.951516	-4.15496
NGB	-0.0878659	1.56565	-1.80439	0.0743924	0.951516	-4.15559
BPIFB4	-0.0615778	1.25823	-1.8043	0.074408	0.951516	-4.15573
CHEK2	0.0944707	1.36618	1.80385	0.0744788	0.951516	-4.15639
CCDC135	-0.0819712	1.60998	-1.80384	0.0744794	0.951516	-4.1564
CNFN	-0.0744493	1.65846	-1.80369	0.0745036	0.951516	-4.15662
GRIPAP1	0.15022	3.54863	1.80356	0.0745249	0.951516	-4.15682
CYP21A1P	-0.157518	3.18951	-1.80323	0.074577	0.951516	-4.1573
SNORD115-31	-0.0614328	0.769806	-1.8031	0.0745963	0.951516	-4.15748
FAM101B	-0.193302	6.53359	-1.80295	0.0746213	0.951516	-4.15771
SPEM1	-0.0536581	1.01635	-1.80256	0.0746821	0.951516	-4.15828
SEMG1	-0.0867788	0.894548	-1.80256	0.0746824	0.951516	-4.15828
CYP4F3	-0.320914	4.99642	-1.80254	0.0746852	0.951516	-4.15831
FBP1	0.131409	2.5805	1.80213	0.0747503	0.951516	-4.15891
HPCAL4	-0.0877182	1.75257	-1.80165	0.0748272	0.951516	-4.15962
TMPO-AS1	-0.0915212	1.75417	-1.80155	0.0748428	0.951516	-4.15977
SPRY2	-0.0583416	0.977811	-1.80148	0.0748531	0.951516	-4.15986
LYPD6	-0.0635246	1.04761	-1.8008	0.0749609	0.951516	-4.16086
PHYHIP	-0.072441	1.27269	-1.80055	0.0750016	0.951516	-4.16124
TGFBRAP1	0.155426	3.11886	1.80005	0.0750809	0.951516	-4.16197
ALG2	-0.119237	3.02596	-1.79952	0.0751649	0.951516	-4.16274
RNU7-71P	0.0659109	0.73546	1.7994	0.075184	0.951516	-4.16292
TBATA	-0.0480014	1.04038	-1.7993	0.0752003	0.951516	-4.16307
MAGEA4	-0.0654822	0.981123	-1.7992	0.0752163	0.951516	-4.16322
PDE9A	-0.0978751	1.65963	-1.79912	0.0752291	0.951516	-4.16333
BEND5	0.0580827	1.1598	1.79896	0.0752549	0.951516	-4.16357
FGD5-AS1	-0.0607792	3.56696	-1.79883	0.075276	0.951516	-4.16376
GPC6-AS1	0.0446095	0.722543	1.79856	0.0753184	0.951516	-4.16415
ARHGEF15	-0.0809508	1.6683	-1.79789	0.0754248	0.951516	-4.16513
NME7	0.0689009	1.12751	1.79771	0.0754541	0.951516	-4.1654
PIAS3	0.0923228	1.75763	1.79723	0.0755301	0.951516	-4.1661
LOC100132999	-0.169135	2.96207	-1.79679	0.0756017	0.951516	-4.16675
GAMT	-0.110163	1.89154	-1.79644	0.0756566	0.951516	-4.16726
LOC100129129	-0.0778411	1.66825	-1.7962	0.0756951	0.951516	-4.16761
LOC100509091	-0.116704	1.58686	-1.79595	0.0757354	0.951516	-4.16798
CAMK2D	0.150053	2.95981	1.79588	0.0757475	0.951516	-4.16809
DVL1	-0.126065	2.41487	-1.79547	0.075812	0.951516	-4.16868
ARPP19	-0.0873978	4.8474	-1.79544	0.0758172	0.951516	-4.16872
PP13004	-0.0729912	0.987494	-1.7954	0.0758231	0.951516	-4.16878
[truncated: 30,081 more rows]
