# Supplementary material
Source: Research Square preprint supplement (doi:10.21203/rs.3.rs-8976053/v1)
Supplement: Supplementary file 1 [file 457f5e4eff335647b8d5ac1b.docx]

**Supplementary Information for**

## **Integrated multi-omics characterization identifies key microenvironmental biomarkers in major depressive disorder microenvironment**

Yunkai Wu1, Weihao Deng2, Jiaquan Liang3, Chunguo Zhang3, Hui Tang2,*, Jinyan Sun1,*

1 School of Medicine, Foshan University, Foshan, China

2 School of Mathematics, Foshan University, Foshan, China;

3 Department of Psychiatry, The Third People's Hospital of Foshan, Guangdong, China;

*** Correspondence:** Hui Tang, Email: [tanghui@fosu.edu.cn](mailto:tanghui@fosu.edu.cn), Jinyan Sun, Email: jinyansun@fosu.edu.cn

**Table S1:** Information of the used database.

**Table S2:** GSE98793 DEG Lists.

**Table S3:** GSE76826 DEG Lists.

**Table S4:** GSE290797 DEG Lists.

**Table S5:** GSE247998 DEG Lists.

**Table S6:** GSE99725 DEG Lists.

**Table S7:** GSE185855 DEG Lists.

**Table S8:** DEGs found by RRA methods.

**Table S9:** DEGs found by Gene intersection methods.

**Table S10:** ALL DEG pathway enrichment result

**Table S11:** Gene intersection method pathway enrichment result.

**Table S12:** RRA method pathway enrichment result.

**Table S13:** GSE144136 Cell Type Markers.

**Table S14:** GSE201687 Cell Type Markers.

**Table S15:** Validation DEGs.

**Table S16:** Validation Pathway enrichment result.

**Supplementary Fig. 1：**Visualizing transcriptomic heterogeneity across cohorts.

**Supplementary Fig. 2:** Transcriptomic heterogeneity and differential expression landscape across six independent peripheral blood cohorts.

**Supplementary Fig. 3:** Deconvolution validates central glial shifts in peripheral blood and their pharmacological reversal.

**Supplementary Fig. 4：**Hyper-connected intercellular signaling landscape in the MDD microenvironment.

**Supplementary Fig. 5:** Recapitulation of the glial-specific transcriptomic signature in the GSE98793 cohort.

**Supplementary Fig. 6:** Independent validation of cell-type-specific marker dysregulation in the GSE76826 cohort.

**Supplementary Fig. 7:** Pharmacological attenuation of glial marker dysregulation by fluoxetine in rat model.

**Supplementary Fig. 8:** Broad pharmacological reversal of the MDD-associated glial signature across multiple antidepressant treatment.

**Supplementary Table 1. Information of the used database.**

| GEO accession codes | Group | Species | Sample Size (n) | Gender (Famle/Male) | Data Preprocessing | Sequencing type | Sample Source |
| --- | --- | --- | --- | --- | --- | --- | --- |
| GSE98793 | Major Depressive Disorder | Human | 128 | 96/32 | RMA Normalized | Bulk RNA-Seq | Blood |
| Healthy Control | 64 | 48/16 |
| GSE76826 | Major Depressive Disorder | Human | 20 | 11/9 | RMA Normalized | Bulk RNA-Seq | Blood |
| Healthy Control | 12 | 7/5 |
| GSE290797 | Major Depressive Disorder | Human | 64 | 64/0 | RMA Normalized | Bulk RNA-Seq | Blood |
| Healthy Control | 28 | 28/0 |
| GSE247998 | Major Depressive Disorder | Human | 73 | 44/29 | Raw Counts | Bulk RNA-Seq | Blood |
| Healthy Control | 27 | 16/11 |
| GSE99725 | Major Depressive Disorder | Human | 15 | unknow | RMA Normalized | Bulk RNA-Seq | Blood |
| Healthy Control | 18 | unknow |
| GSE185855 | Major Depressive Disorder | Human | 26 | 14/12 | Raw Counts | Bulk RNA-Seq | Blood |
| Healthy Control | 21 | 10/11 |
| GSE222756 | Fluoxetine | Rat | 50 | unknow | Raw Counts | Bulk RNA-Seq | Brain |
| Bupropion | 50 |
| Desipramine | 50 |
| Probiotics | 50 |
| Maltodextrin | 50 |
| Control | 50 |
| GSE194289 | Fluoxetine | Rat | 106 | unknow | Raw Counts | Bulk RNA-Seq | Brain |
| Control | 106 |
| GSE144136 | Major Depressive Disorder | Human | 12 | 0/12 | Raw Counts | scRNA-seq | Brain |
| Healthy | 7 | 0/7 |
| GSE201687 | Major Depressive Disorder | Macaque | 17 | 17/0 | Raw Counts | scRNA-seq | Brain |
| Healthy | 17 | 17/0 |

**Supplementary Fig. 1: Visualizing transcriptomic heterogeneity across cohorts.** PCA plots derived from the expression profiles of identified differentially expressed genes (DEGs) across independent peripheral blood datasets. Samples are stratified by disease status (MDD: red; Control: blue) and biological sex (Female: triangle; Male: square).

**Supplementary Fig. 2: Transcriptomic heterogeneity and differential expression landscape across six independent peripheral blood cohorts.** Volcano plots illustrating the differential gene expression profiles for each of the six included datasets (GSE98793, GSE76826, GSE290797, GSE247998, GSE99725, and GSE185855). The x-axis represents the log2 fold change (log2FC), and the y-axis represents the negative log10 adjusted p-value. Vertical and horizontal dashed lines denote the stringent significance thresholds applied in this study (p < 0.05 and |log2FC| > log2(1.1)). Red points indicate significantly up-regulated genes, while blue points indicate significantly down-regulated genes. The variation in the number and distribution of DEGs across datasets highlights the substantial inter-study heterogeneity inherent to MDD transcriptomics.

**Supplementary Fig. 3: Deconvolution validates central glial shifts in peripheral blood and their pharmacological reversal.** **A** Box plots displaying the estimated cellular proportions of microglia (MIC) and oligodendrocytes (OLI) in the GSE98793 human blood dataset. **B** Pharmacological validation in rat treatment models (GSE222756). Box plots illustrate the dynamic restoration of MIC and OLI proportions following therapeutic intervention. **C** Stacked bar plots summarizing the global cellular composition landscape inferred by BayesPrism across representative human blood cohorts (GSE76826 and GSE98793).

**Supplementary Fig. 4: Hyper-connected intercellular signaling landscape in the MDD microenvironment.** Circle plots illustrating the inferred cell-cell communication networks in human and macaque brain scRNA-seq datasets using CellChat analysis. Comparative visualization between Healthy (right) and Depressed (left) states reveals an intensified signaling architecture in MDD. The edge width represents the interaction strength (probability) of ligand-receptor pairs, and node size correlates with the number of interactions.

**Supplementary Fig. 5: Recapitulation of the glial-specific transcriptomic signature in the GSE98793 cohort.** Violin plots showing the normalized expression of key glial markers in the GSE98793 dataset, providing further independent validation. Panels with blue-shaded backgrounds represent microglia-associated genes (MIC), and those with red-shaded backgrounds represent oligodendrocyte-associated genes (OLI). *(p < 0.05, *p < 0.01, **p < 0.001, **p < 0.0001; ns, not significant; two-sided Wilcoxon rank-sum test).

**Supplementary Fig. 6: Independent validation of cell-type-specific marker dysregulation in the GSE76826 cohort.** Violin plots showing the normalized expression of key glial markers in the GSE76826 dataset, providing further independent validation. Panels with blue-shaded backgrounds represent microglia-associated genes (MIC), and those with red-shaded backgrounds represent oligodendrocyte-associated genes (OLI). The data faithfully recapitulate the core finding, demonstrating a clear and statistically significant elevation of microglial transcripts (*HK2, ANO10*) and a reduction of oligodendrocyte transcripts (*CCDC50, FUT8*) in individuals with MDD (red violins) versus controls (blue violins). *(p < 0.05, *p < 0.01, **p < 0.001, **p < 0.0001; ns, not significant; two-sided Wilcoxon rank-sum test).

**Supplementary Fig. 7: Pharmacological attenuation of glial marker dysregulation by fluoxetine in rat model.** Violin plots from the GSE194289 rat dataset demonstrating the dynamic responsiveness of prioritized biomarkers to antidepressant treatment. Blue-shaded panels correspond to microglia (MIC) markers, and red-shaded panels correspond to oligodendrocyte (OLI) markers. Chronic fluoxetine administration (orange violins) significantly reversed the stress-induced expression changes, attenuating the upregulation of microglia-specific genes (*Ano10, Hk2*) and restoring the expression of oligodendrocyte-specific genes (*Ccdc50, Zfp532*) compared to the sham-treated group (blue violins). This provides crucial in vivo evidence for the state-dependent nature of the identified biomarkers. *(p < 0.05, *p < 0.01, **p < 0.001, **p < 0.0001; ns, not significant).

**Supplementary Fig. 8: Broad pharmacological reversal of the MDD-associated glial signature across multiple antidepressant treatment.** Violin plots from the GSE222756 rat dataset assessing the effect of various therapeutic interventions on the expression of core glial markers. Microglia (MIC) and oligodendrocyte (OLI) associated genes are highlighted with blue and red-shaded backgrounds, respectively. Critically, treatment with mechanistically distinct antidepressants effectively normalized the expression of both microglial (*Hk2, Irak3*) and oligodendrocyte (*Ccdc50, Fut8*) markers. These results confirm that the identified transcriptomic signature is not only pharmacologically reversible but also responsive to multiple classes of therapeutics, strengthening its relevance as a potential tool for monitoring treatment efficacy. *(p < 0.05, *p < 0.01, **p < 0.001, **p < 0.0001; ns, not significant).
