# Supplementary material
Source: Research Square preprint supplement (doi:10.21203/rs.3.rs-8976053/v1)
Supplement: Supplementary file 2 [file 0f30a0785fbfc4d1e9bc8187.xlsx]

## Sheet: Sheet1
gene	logFC_GSE98793	P.Value_GSE98793	adj.P.Val_GSE98793	logFC_GSE76826	P.Value_GSE76826	adj.P.Val_GSE76826	Status
AATK	0.152381	0.0143178	0.494866	914.497	0.00423417	0.105598	Upregulated
ABAT	0.172176	0.00355189	0.34567	167.805	0.00720859	0.134288	Upregulated
ADM	0.142155	0.0337457	0.597893	4422.44	0.0111686	0.166661	Upregulated
ANO10	0.210821	0.00986419	0.455031	351.562	0.000199597	0.0253078	Upregulated
ASPH	0.178101	0.00209736	0.305173	63.9696	0.0293477	0.269292	Upregulated
ASPRV1	0.165161	0.0272401	0.563779	1101.63	0.0135329	0.179798	Upregulated
ATP8B4	0.25267	0.0153819	0.499903	20.2327	0.0123203	0.173514	Upregulated
ATXN1L	0.138025	0.00496534	0.381022	36.2453	0.0132093	0.177943	Upregulated
BMX	0.189624	0.0486836	0.655059	126.791	0.0427147	0.32734	Upregulated
CBS	0.163005	0.0192093	0.522811	247.894	0.0494528	0.351907	Upregulated
CD163	0.21653	0.00543037	0.381022	1099.81	0.00516423	0.117199	Upregulated
CD63	0.139698	0.0453411	0.644393	5402.43	4.58431e-05	0.0149501	Upregulated
CDK5R1	0.146492	0.00275645	0.325261	157.488	0.0297986	0.271447	Upregulated
CEBPA	0.194266	0.00298858	0.333848	581.526	0.0357403	0.29746	Upregulated
CKAP4	0.13859	0.000210958	0.180226	836.119	0.00259647	0.0826582	Upregulated
CLEC3B	0.17733	0.000845855	0.228681	288.827	0.00218598	0.0735385	Upregulated
CRAT	0.1981	0.00641217	0.39241	107.102	0.0258799	0.25333	Upregulated
CYP1B1	0.192438	0.0107177	0.471004	635.583	0.0373045	0.304347	Upregulated
F5	0.210333	0.0192257	0.522811	90.918	0.00567361	0.121905	Upregulated
FGD4	0.195943	0.00617154	0.385854	216.76	0.00759943	0.138284	Upregulated
FKBP9	0.262116	0.00765935	0.413571	28.416	0.0379897	0.307512	Upregulated
GADD45A	0.268082	0.00134276	0.268025	118.922	0.0234888	0.240043	Upregulated
GBE1	0.143916	0.0179946	0.516571	147.453	0.00048699	0.0364981	Upregulated
HK2	0.240567	3.82557e-05	0.0817065	344.323	0.0067856	0.131367	Upregulated
HK3	0.145382	0.048478	0.654898	298.235	0.0219953	0.233248	Upregulated
IL13RA1	0.15412	0.0213085	0.53239	1570.57	0.0091172	0.150914	Upregulated
IL1R1	0.180534	0.018747	0.522811	17.5537	0.0146905	0.187201	Upregulated
IL1R2	0.189867	0.0136427	0.491722	482.167	0.0419797	0.323484	Upregulated
INSC	0.250601	0.0449445	0.644393	17.3724	0.0347348	0.293133	Upregulated
IRAK3	0.295918	8.41021e-05	0.112266	104.649	0.0261749	0.254662	Upregulated
JDP2	0.140785	0.0414948	0.624944	1199.67	0.00216665	0.073239	Upregulated
KIAA0319	0.184281	0.00935043	0.44716	17.584	0.0335589	0.288161	Upregulated
KIF3C	0.170153	0.00514675	0.381022	36.8179	0.00235099	0.077035	Upregulated
MAPK14	0.143069	0.0116782	0.472107	192.262	0.0384393	0.308891	Upregulated
MCTP1	0.1913	0.0388988	0.618615	131.407	5.98873e-05	0.0162807	Upregulated
MGST1	0.178836	0.000610321	0.224989	289.731	0.025548	0.251472	Upregulated
MPP1	0.181158	0.0229272	0.542124	1215.1	0.00150884	0.0618954	Upregulated
MTMR3	0.14368	0.0318336	0.58899	65.3528	0.0484636	0.348657	Upregulated
NCEH1	0.263512	0.0274817	0.564922	68.4558	0.0431473	0.328919	Upregulated
NDST1	0.182285	0.000613463	0.224989	1738.25	0.0131856	0.177798	Upregulated
NRG1	0.172113	0.00878372	0.439517	119.752	0.000894675	0.0476749	Upregulated
PLBD1	0.230035	0.000729298	0.226517	5174.6	0.00446023	0.108312	Upregulated
PLXDC2	0.161133	0.00162934	0.293858	333.682	0.0280011	0.262606	Upregulated
RAB13	0.241247	0.00346062	0.343777	11.195	0.0201149	0.222595	Upregulated
RNF135	0.149891	0.0269689	0.561404	778.278	0.00119682	0.0550247	Upregulated
RRAGD	0.169157	0.005411	0.381022	120.344	0.0216531	0.23146	Upregulated
RSPH9	0.232556	0.00594972	0.385854	226.371	0.0292047	0.26844	Upregulated
S100P	0.394581	0.0257624	0.557782	29140.5	0.00777055	0.13941	Upregulated
S1PR3	0.140313	0.0164858	0.508202	223.488	0.0133837	0.179189	Upregulated
SIAH2	0.203422	0.0266763	0.559485	604.355	0.00278424	0.0855733	Upregulated
SLC22A15	0.228665	0.0116569	0.472107	119.943	0.0177065	0.208367	Upregulated
SLC25A40	0.157833	0.0384908	0.617646	15.0621	0.0188942	0.215276	Upregulated
SRPK1	0.155801	0.00716069	0.41129	1443.78	0.00808283	0.141765	Upregulated
SRXN1	0.186488	0.0426085	0.630609	1139.65	0.0199626	0.221379	Upregulated
ST3GAL6	0.174399	0.00493087	0.381022	153.465	0.00787201	0.139904	Upregulated
TFEB	0.14222	0.0495692	0.655909	1198.2	0.000566156	0.0392435	Upregulated
TIMP2	0.151824	0.000135105	0.124916	4726.11	0.00202532	0.0705431	Upregulated
TLR2	0.185901	0.0104532	0.46805	2941.78	0.0193652	0.218506	Upregulated
TNFSF13	0.158605	0.00530849	0.381022	192.122	0.0119342	0.171215	Upregulated
TSHZ3	0.251433	0.000653118	0.224989	124.401	0.00641596	0.128235	Upregulated
UBTD1	0.144087	0.00274684	0.325261	365.343	0.00822301	0.143051	Upregulated
WIPI1	0.160653	0.00414372	0.354753	777.709	0.000190666	0.0250671	Upregulated
ABCD2	-0.278316	0.00236954	0.320308	-7.18522	0.0415383	0.322037	Downregulated
ANKRD36	-0.154061	0.00620725	0.385854	-68.144	0.0141501	0.183631	Downregulated
ATF7IP2	-0.176628	0.000810387	0.22774	-100.887	0.0363219	0.300147	Downregulated
CCDC50	-0.171554	0.0215107	0.53239	-71.8817	0.00619401	0.127302	Downregulated
CHIC1	-0.146691	0.000708982	0.226517	-11.3764	0.0393598	0.313617	Downregulated
COL4A4	-0.140648	0.0439333	0.64006	-20.7205	0.0363888	0.300391	Downregulated
CRYGS	-0.220203	0.000985345	0.241452	-21.8973	0.0361558	0.299568	Downregulated
CXCR6	-0.192643	0.00958297	0.451097	-113.22	0.0168984	0.202145	Downregulated
DPP4	-0.144314	0.0279942	0.568887	-158.019	0.00231926	0.0763073	Downregulated
EPHA4	-0.144611	0.00958882	0.451097	-63.3991	0.00676875	0.131279	Downregulated
EVL	-0.149878	0.00118794	0.260709	-1692.79	0.0383504	0.308641	Downregulated
FAM3B	-0.581896	0.00744113	0.413343	-112.667	0.0166101	0.200669	Downregulated
FGF9	-0.186587	0.00306369	0.333848	-5.023	0.0182526	0.211462	Downregulated
FUT8	-0.214442	0.0086466	0.435552	-40.6344	0.045716	0.338065	Downregulated
GIMAP5	-0.147948	0.0083951	0.431016	-618.449	0.00890556	0.148879	Downregulated
GPR171	-0.243433	6.99579e-05	0.102715	-463.431	0.03667	0.301586	Downregulated
HSP90AB1	-0.153635	0.0123746	0.473653	-177.702	0.0338963	0.289731	Downregulated
IL7R	-0.197632	0.000389802	0.203674	-4101.55	0.0177712	0.208876	Downregulated
LOC100506639	-0.156832	0.00444073	0.366547	-25.059	0.0433853	0.32963	Downregulated
LOC389834	-0.263418	0.0167629	0.509278	-15.9077	0.0161901	0.198225	Downregulated
LY9	-0.159146	0.00626435	0.385854	-162.699	0.0127988	0.175749	Downregulated
MYC	-0.179468	0.0457049	0.644393	-172.467	0.0305867	0.274493	Downregulated
NMT2	-0.16304	0.0138571	0.491722	-25.1539	0.0273511	0.259753	Downregulated
NR1D2	-0.145556	0.0257763	0.557782	-20.1728	0.0294512	0.269704	Downregulated
OTUD3	-0.198308	0.00282325	0.327712	-15.2703	0.0402217	0.317098	Downregulated
PMS2P5	-0.140521	0.000380889	0.203674	-68.5899	0.0228103	0.236577	Downregulated
PTPRK	-0.205547	0.0319222	0.589787	-17.7827	0.0399888	0.316117	Downregulated
RPLP0	-0.194294	0.00327654	0.335954	-6320.22	0.0169945	0.202815	Downregulated
SEC31B	-0.160803	0.0111519	0.472107	-354.321	0.0404997	0.317493	Downregulated
SPINK2	-0.2056	0.00102346	0.244434	-45.5177	0.00259732	0.0826582	Downregulated
STX17	-0.146424	0.000279095	0.203674	-35.5974	0.00468271	0.110861	Downregulated
TCF4	-0.156	0.00924582	0.44677	-276.639	0.0331066	0.286492	Downregulated
THEM4	-0.1884	0.00384085	0.34613	-71.0985	0.000150611	0.0232009	Downregulated
TRIB2	-0.15461	0.00613639	0.385854	-55.578	0.0306592	0.274738	Downregulated
VSIG1	-0.202947	0.0224631	0.538458	-29.3072	0.00233564	0.0766105	Downregulated
ZNF37BP	-0.205706	0.000117063	0.124916	-50.1242	0.00422509	0.105598	Downregulated
ZNF532	-0.192891	0.0176982	0.511601	-8.97378	0.035058	0.294068	Downregulated
