# Supplementary material
Source: Research Square preprint supplement (doi:10.21203/rs.3.rs-8976053/v1)
Supplement: Supplementary file 3 [file 1cecbd6c0ba402a6604b9118.xlsx]

## Sheet: Sheet1
gene	logFC	AveExpr	t	P.Value	adj.P.Val	B
OR14K1	-0.37037	0.1	-4.03713	0.000107273	1	1.12334
DOCK8-AS2	1.64028	1.79	4.02543	0.000111952	1	1.08539
LINC02926	-1.84221	2.47	-4.0135	0.000116921	1	1.0468
IGLV8-61	-35.7286	46.77	-3.99073	0.000127005	1	0.973321
RPL34P10	-7.82648	34.62	-3.89428	0.000179692	1	0.66543
ATP6V1G2	-0.709792	0.63	-3.86299	0.000200872	1	0.566699
KCNJ5-AS1	-8.45003	25.35	-3.86283	0.000200988	1	0.566185
MIR4706	-1.6139	2.97	-3.85421	0.000207231	1	0.539095
LINC00887	-3.04921	2.7	-3.82033	0.00023361	1	0.433021
ZNF774	-6.03907	18.11	-3.70731	0.00034672	1	0.0840372
RN7SL614P	-3.79858	11.19	-3.68222	0.00037809	1	0.00761474
MYREM	-6.71689	13.43	-3.66942	0.00039511	1	-0.0312178
MIR4666A	-0.437849	0.31	-3.66674	0.000398764	1	-0.0393347
MYBPC2	-5.38508	7.18	-3.65361	0.000417131	1	-0.0790333
LINC01252	-17.3841	39.68	-3.64509	0.000429486	1	-0.104759
LILRB5	-4.99543	4.02	-3.6387	0.000438975	1	-0.124014
ALPK2	-10.8975	21.23	-3.60764	0.000488006	1	-0.217268
GXYLT1P3	-0.496702	0.23	-3.60081	0.000499461	1	-0.237693
TNFRSF4	-32.5581	130.64	-3.56625	0.000561415	1	-0.340565
POLR2J3	-95.0751	336.41	-3.56108	0.000571299	1	-0.35591
BEND7	64.0791	134	3.54157	0.000610052	1	-0.413599
SNORA2A	-2.63166	7.19	-3.51612	0.000664353	1	-0.488502
CYP4X1	-0.282598	0.09	-3.50088	0.000699013	1	-0.533148
MAST4-AS1	2.56266	4.13	3.47394	0.000764487	1	-0.611702
SPSB2	4.2552	14.81	3.46274	0.000793391	1	-0.644244
IGHD2-15	-0.377473	0.28	-3.43734	0.000862763	1	-0.717703
IGSF3P2	-1.08625	1.17	-3.42451	0.000899947	1	-0.75466
PRDX3P2	-0.259259	0.07	-3.41093	0.000940931	1	-0.793648
CCT6B	-11.3617	42.78	-3.39198	0.00100109	1	-0.847875
ACTG1P25	-0.656012	0.41	-3.36257	0.00110162	1	-0.931548
RN7SL334P	-9.46677	37.83	-3.3589	0.00111481	1	-0.941947
LINC02395	-0.487062	0.2	-3.33419	0.00120756	1	-1.01175
IGLVI-70	-10.4739	8.28	-3.33325	0.00121126	1	-1.01442
QRFP	-0.581938	0.39	-3.33074	0.00122108	1	-1.02147
GPSM1	-17.4201	73.95	-3.29351	0.00137621	1	-1.12581
HMGB1P21	-2.07915	3.26	-3.2845	0.00141641	1	-1.15091
IGHA2	-236.558	248.35	-3.27032	0.00148195	1	-1.19032
PRSS29P	-0.282598	0.09	-3.25261	0.00156781	1	-1.23936
BTBD6P1	-54.8118	194.58	-3.24567	0.00160267	1	-1.25851
AGBL2	-15.3856	85.25	-3.21912	0.00174291	1	-1.33148
RPS23P6	-7.34247	31.64	-3.20625	0.00181496	1	-1.36669
PLD4	-132.96	505.05	-3.2005	0.00184806	1	-1.38239
CPLX1	-4.47945	9.73	-3.19524	0.00187876	1	-1.39671
CNR2	-184.221	742	-3.18401	0.00194605	1	-1.42727
LINC03126	-8.50533	4.68	-3.18026	0.00196901	1	-1.43745
RN7SL619P	-0.91933	1.44	-3.15933	0.00210176	1	-1.49407
TOP1MT	-83.279	301.91	-3.15235	0.00214793	1	-1.51292
MIR5579	-0.882801	0.8	-3.1445	0.00220092	1	-1.53405
IGKV1D-8	-6.63267	10.01	-3.14131	0.00222274	1	-1.5426
ANKRD36P1	-0.333333	0.09	-3.12723	0.00232173	1	-1.58036
SLCO4A1	-7.46626	23.92	-3.12703	0.00232317	1	-1.5809
EEF1E1P1	-1.25013	1.68	-3.11981	0.00237557	1	-1.60022
PRSS57	7.99899	17.58	3.11906	0.00238108	1	-1.60222
RN7SL316P	-0.836631	1.13	-3.11707	0.00239574	1	-1.60754
IGKV1OR2-11	-0.38965	0.16	-3.10743	0.00246794	1	-1.63325
FXYD6	-26.655	107.69	-3.10595	0.00247921	1	-1.63719
LINC02812	-7.66514	32.96	-3.09331	0.00257735	1	-1.67079
BMPR1AP1	-1.46017	1.86	-3.09157	0.00259113	1	-1.6754
RNF183	-0.766109	0.7	-3.08497	0.00264407	1	-1.69289
RNFT1-DT	0.891426	0.91	3.07711	0.00270837	1	-1.71367
LRRC37A	-19.5221	24.86	-3.07317	0.00274117	1	-1.72407
LINC01700	-0.808727	0.78	-3.07139	0.00275613	1	-1.72878
BCAR3-AS1	-5.52004	20.6	-3.06946	0.00277236	1	-1.73385
C20orf202	-2.4069	6.28	-3.06539	0.00280702	1	-1.74459
TUBBP10	-0.520548	0.62	-3.05514	0.00289598	1	-1.77154
CBR1-AS1	-1.64536	3.91	-3.05208	0.00292306	1	-1.77958
P2RX6	-5.59107	15.4	-3.0296	0.00312925	1	-1.83841
GCNT3	-0.525622	0.32	-3.02899	0.00313499	1	-1.84
BCAR3	-15.2887	61.58	-3.02563	0.00316698	1	-1.84875
RNU6-999P	-0.725013	0.73	-3.02358	0.00318673	1	-1.85411
CRISPLD1	1.46169	2.03	3.02293	0.00319291	1	-1.85579
SNORD116-9	-0.835616	1.39	-3.02244	0.00319772	1	-1.85708
CEP85	-91.4236	619.52	-3.01788	0.00324195	1	-1.86893
RN7SL854P	-0.288179	0.16	-3.00537	0.00336644	1	-1.90141
RNY4P7	-4.76966	19.37	-3.00136	0.00340727	1	-1.9118
FGFR4	-5.95079	18.73	-2.99967	0.00342465	1	-1.91618
CALB2	-0.222222	0.06	-2.99385	0.00348496	1	-1.93122
CALM2P4	-0.222222	0.06	-2.99385	0.00348496	1	-1.93122
PSCA	-0.222222	0.06	-2.99385	0.00348496	1	-1.93122
CEACAMP2	-0.111111	0.03	-2.99243	0.00349986	1	-1.9349
LINC02241	-0.111111	0.03	-2.99243	0.00349986	1	-1.9349
H2BP6	-1.33384	1.73	-2.9852	0.00357654	1	-1.95356
TPT1-AS1	-116.339	795.85	-2.98514	0.00357717	1	-1.95371
POU4F1	-2.31862	3.9	-2.97413	0.00369689	1	-1.98205
IGHV3-64	-5.65804	4.24	-2.97029	0.00373945	1	-1.99189
BCO2	-10.3511	52.74	-2.96513	0.0037975	1	-2.00515
TOX2	-16.2364	62.74	-2.96441	0.00380557	1	-2.00697
GMCL2	-0.54896	0.34	-2.9624	0.00382844	1	-2.01213
NTN5	-8.27905	27.66	-2.96226	0.00383006	1	-2.01249
RNU6-750P	-1.62963	5.44	-2.9618	0.00383536	1	-2.01368
LINC01585	-0.292237	0.12	-2.95978	0.00385841	1	-2.01883
RN7SKP85	-0.292237	0.12	-2.95978	0.00385841	1	-2.01883
EIF5AP3	-4.63014	14.62	-2.95802	0.00387871	1	-2.02334
ARGFXP2	-0.395231	0.23	-2.95544	0.00390858	1	-2.02994
PLEKHA7	-31.4703	134.36	-2.95027	0.00396906	1	-2.04314
NKAIN1	-0.342973	0.12	-2.94621	0.00401721	1	-2.0535
DGAT2L7P	-0.86555	1.22	-2.93529	0.00414932	1	-2.0813
FA2H	-7.01319	13.51	-2.93238	0.00418525	1	-2.08871
TEDC1	-6.76915	30.54	-2.93186	0.0041917	1	-2.09003
TRAF3IP1	-33.4795	208.56	-2.93171	0.00419357	1	-2.09041
MIR3657	-1.81532	5.86	-2.93062	0.00420711	1	-2.09318
CDYL-AS1	-0.590563	0.68	-2.92606	0.00426408	1	-2.10473
PRELID3BP4	-1.46728	3.04	-2.92476	0.00428047	1	-2.10803
CACNA1H	-28.7829	101.47	-2.92031	0.00433713	1	-2.11931
IGKV4-1	-328.891	393.65	-2.91404	0.00441793	1	-2.13515
CEACAM18	-0.741248	0.57	-2.90971	0.00447459	1	-2.14609
SHISA5P1	-1.54744	2.5	-2.90425	0.004547	1	-2.15985
HSBP1P1	1.51497	4.18	2.89725	0.00464148	1	-2.17749
ABLIM2	-13.5337	73.75	-2.89144	0.00472113	1	-2.19207
PHF5AP7	-0.680873	0.54	-2.88717	0.00478058	1	-2.2028
ADARB1	-256.381	1519.62	-2.88547	0.00480436	1	-2.20705
RN7SL67P	-1.92948	3.11	-2.88471	0.00481501	1	-2.20895
ROM1	-4.60984	22.82	-2.88288	0.00484098	1	-2.21355
RPSAP42	-0.333333	0.09	-2.87667	0.00492952	1	-2.22908
RNA5SP229	-1.35008	3.57	-2.87661	0.00493045	1	-2.22924
PRSS42P	-4.70827	5.6	-2.8758	0.00494203	1	-2.23125
RNU6-540P	3.12735	12.32	2.87284	0.00498491	1	-2.23865
ENC1	-287.939	761.36	-2.86792	0.00505691	1	-2.25092
CTRB1	-0.185185	0.05	-2.86745	0.0050639	1	-2.25211
RPL31P50	-0.185185	0.05	-2.86745	0.0050639	1	-2.25211
TMCC2-AS1	-0.185185	0.05	-2.86745	0.0050639	1	-2.25211
RPL7AP14	-1.27296	2.33	-2.86556	0.0050918	1	-2.25681
CDK5RAP1	-89.4297	714.42	-2.86323	0.00512646	1	-2.26262
RHOD	-1.37544	2.07	-2.86224	0.0051412	1	-2.26507
DUSP5P1	-2.59513	2.55	-2.86048	0.00516754	1	-2.26945
LINC02766	-4.07103	11.88	-2.85931	0.00518524	1	-2.27237
DNAH8	-14.656	42.19	-2.85746	0.00521319	1	-2.27697
SGCA	-4.42516	10.14	-2.85456	0.00525728	1	-2.28418
MRO	-0.587519	0.46	-2.85454	0.0052576	1	-2.28423
LINC02820	-0.636733	0.35	-2.84859	0.00534908	1	-2.29898
RN7SL211P	-1.39016	2.8	-2.84649	0.00538171	1	-2.30418
OR7E110P	-0.171487	0.06	-2.83948	0.00549213	1	-2.32154
CRELD2	-56.9975	445.54	-2.83663	0.00553749	1	-2.32857
RNU6-1223P	-1.6139	4.97	-2.83511	0.00556187	1	-2.33233
RPL13AP8	-0.903602	0.97	-2.83445	0.00557255	1	-2.33397
MIR4431	-0.157788	0.07	-2.82947	0.00565318	1	-2.34624
LINC02631	10.6352	51.06	2.82745	0.00568631	1	-2.35123
TSPEAR	6.99848	13.22	2.8257	0.00571513	1	-2.35555
NPM1P5	-0.428209	0.28	-2.82333	0.00575424	1	-2.36138
SPRY4-AS1	-0.13445	0.05	-2.82165	0.00578219	1	-2.36551
ZNF275	-6.2141	28.76	-2.81893	0.00582768	1	-2.37221
IGDCC3	-0.231862	0.09	-2.81554	0.0058848	1	-2.38053
IGHV1-69	-13.136	20.67	-2.81482	0.00589698	1	-2.3823
CAGE1	-2.01979	4.97	-2.81291	0.00592932	1	-2.38697
UNC93B7	-2.15018	3.06	-2.80928	0.00599159	1	-2.39588
LIPE-AS1	-10.2451	60.41	-2.80489	0.00606751	1	-2.40663
PLAAT2	-6.19229	5.85	-2.80459	0.00607282	1	-2.40737
PLAAT3	-31.8569	136.3	-2.80446	0.00607508	1	-2.40769
HGH1	-4.6342	16.58	-2.80209	0.00611639	1	-2.41347
VPS26BP1	-5.47844	23.26	-2.79703	0.00620567	1	-2.42583
EPHB3	-17.7879	51.2	-2.79007	0.00633047	1	-2.44281
CCND1	-11.6834	45.36	-2.78847	0.00635962	1	-2.44672
MIR4432HG	-7.58245	23.65	-2.77862	0.0065408	1	-2.47066
SNORD116-12	-0.970573	1.81	-2.77549	0.00659943	1	-2.47826
CPXM2	2.05784	4.28	2.77539	0.00660125	1	-2.4785
SLC15A4	666.461	4878.22	2.77264	0.00665319	1	-2.48517
AJAP1	-25.0999	66.64	-2.77129	0.00667886	1	-2.48845
RBMX2P3	-2.84424	9.22	-2.7701	0.00670147	1	-2.49133
IGKV1-16	-40.3851	57.63	-2.76836	0.00673473	1	-2.49554
THAP5P1	-4.70015	5.68	-2.76643	0.0067718	1	-2.50022
PCOLCE	-10.5611	54.92	-2.75882	0.00691959	1	-2.51859
MTND1P9	-0.278539	0.13	-2.75583	0.00697847	1	-2.5258
OXCT2	-2.61086	5.02	-2.75476	0.00699971	1	-2.52839
CCDC12	-66.9741	601.22	-2.75128	0.00706907	1	-2.53677
TAS2R43	-6.87367	7.76	-2.74982	0.00709829	1	-2.54028
TIMELESS	-49.3871	291.54	-2.74629	0.00716959	1	-2.54878
RACK1P1	-2.79858	10.92	-2.74364	0.00722342	1	-2.55514
SNORA16B	6.88382	31.84	2.73983	0.00730162	1	-2.5643
PRR13P5	-63.0548	163.97	-2.7355	0.00739128	1	-2.57467
XCL1	-11.4703	28.96	-2.73519	0.00739766	1	-2.5754
WASH3P	47.7976	307.67	2.73064	0.00749317	1	-2.5863
PAX3	-0.5586	0.37	-2.72865	0.00753536	1	-2.59107
CD1B	-1.98275	3.96	-2.72627	0.00758599	1	-2.59676
GRAMD1A-AS1	1.72045	4.33	2.72535	0.00760554	1	-2.59894
SORD2P	-10.483	22.94	-2.72307	0.00765452	1	-2.6044
FRG1-DT	-2.88635	6.93	-2.7228	0.00766037	1	-2.60504
GPR17	4.77473	10.93	2.72014	0.00771774	1	-2.61138
GRM7	-0.315576	0.14	-2.71939	0.00773397	1	-2.61316
RNU6-979P	-3.83562	19.2	-2.71685	0.00778933	1	-2.61922
RNF216-IT1	-7.41806	42.77	-2.71617	0.00780437	1	-2.62086
A1BG-AS1	-44.2669	260.5	-2.71595	0.00780899	1	-2.62136
LINC02245	-11.8843	36.88	-2.71488	0.00783255	1	-2.62392
PALD1	-9.35667	35.54	-2.71395	0.00785303	1	-2.62613
IGKV1D-27	-1.49163	1.8	-2.71133	0.00791085	1	-2.63236
IGKV1-9	-48.8209	76.62	-2.71125	0.00791264	1	-2.63255
RIBC2	-2.13039	3.63	-2.70884	0.00796636	1	-2.63829
SNORA63D	-1.32826	2.66	-2.70876	0.00796809	1	-2.63847
MIR3680-1	-3.6347	14.68	-2.70861	0.00797148	1	-2.63884
RSPH6A	-2.10147	5.54	-2.70855	0.00797264	1	-2.63896
PTGES3P3	-1.66768	4.19	-2.70783	0.00798893	1	-2.64069
ZNF295-AS1	-0.757991	0.78	-2.70706	0.00800598	1	-2.6425
CACNA1C-IT3	-0.241502	0.12	-2.70702	0.008007	1	-2.64261
MTND2P2	-4.15576	17.67	-2.706	0.00802997	1	-2.64504
CHRM5	-0.325216	0.17	-2.70331	0.00809053	1	-2.65141
PI3	470.963	1099.47	2.7022	0.00811559	1	-2.65403
RNU6-137P	-1.35515	4.27	-2.70096	0.00814381	1	-2.65698
AHRR	11.3562	41.29	2.69997	0.00816633	1	-2.65932
MARCHF10	-1.88382	4.81	-2.69902	0.00818817	1	-2.66158
MSTO2P	-5.78792	30.96	-2.69698	0.00823494	1	-2.66641
RN7SKP130	1.10807	1.92	2.69594	0.00825887	1	-2.66887
IQGAP3	5.21969	11.44	2.69559	0.00826702	1	-2.66971
RN7SL116P	-7.77423	33.51	-2.69199	0.00835034	1	-2.67821
CFI	-0.208524	0.07	-2.68782	0.00844798	1	-2.68806
OR14I1	-0.208524	0.07	-2.68782	0.00844798	1	-2.68806
IGHD	-208.481	556.29	-2.68385	0.00854194	1	-2.69743
MTCH2P3	0.699645	0.77	2.67923	0.0086524	1	-2.70832
RIOX1	-0.425672	0.43	-2.67769	0.00868937	1	-2.71193
IZUMO2	-0.190766	0.12	-2.67544	0.0087439	1	-2.71722
TNRC18P1	-37.5627	185.32	-2.66958	0.00888724	1	-2.73099
SNAI3	75.069	534.43	2.66813	0.00892307	1	-2.7344
KCNJ15	2333.25	8839.16	2.66672	0.00895803	1	-2.7377
BPHL	-24.101	148.11	-2.66457	0.00901154	1	-2.74274
IGKV5-2	-6.11872	13.2	-2.66433	0.00901759	1	-2.74331
RBMS2	-51.3293	243.9	-2.66194	0.00907732	1	-2.7489
SMIM10	-2.03957	3.4	-2.66068	0.00910909	1	-2.75185
CBX1P3	0.87722	1.27	2.66049	0.00911392	1	-2.7523
TREML2	357.717	2199.8	2.65489	0.00925594	1	-2.76538
COL28A1	2.72451	7.1	2.65285	0.00930838	1	-2.77016
ZNF717	-31.9548	103.71	-2.65129	0.00934835	1	-2.77378
IGKV1D-35	-0.321157	0.21	-2.6446	0.00952233	1	-2.78937
GPR25	-20.8331	77.94	-2.64261	0.0095748	1	-2.79401
RPS3AP34	-7.75799	21.67	-2.64192	0.00959303	1	-2.79562
IGKJ4	-37.652	69.44	-2.64062	0.00962725	1	-2.79863
DOCK6-AS1	4.069	9.6	2.63914	0.00966673	1	-2.80208
SLC25A19	-29.2476	229.39	-2.63637	0.00974067	1	-2.80852
DRG1P1	-1.02841	1.99	-2.6299	0.00991516	1	-2.82351
ZDHHC11B	-17.0228	48.24	-2.62899	0.00994	1	-2.82562
DNAJC9P1	1.09792	1.32	2.62806	0.00996529	1	-2.82777
MTND6P4	-3.32116	8.02	-2.62649	0.0100083	1	-2.83141
MTCO3P29	-0.278539	0.13	-2.62628	0.0100141	1	-2.83189
RANBP20P	2.11568	4.1	2.62422	0.0100707	1	-2.83665
CPLX4	-0.231862	0.09	-2.6229	0.0101072	1	-2.83971
PMEPA1	-60.1862	214.99	-2.62006	0.0101863	1	-2.84628
WNT9A	-2.1238	6.82	-2.6166	0.0102831	1	-2.85426
RNU6-130P	-2.62557	12.75	-2.61464	0.0103383	1	-2.85877
RPS3AP48	-0.2552	0.11	-2.6104	0.0104587	1	-2.86854
LYVE1	16.5703	60.8	2.60997	0.010471	1	-2.86954
RPL21P115	-1.29427	2.87	-2.60982	0.0104752	1	-2.86987
MAP3K10	-57.9224	439.05	-2.60955	0.0104832	1	-2.87051
UCA1-AS1	-1.11517	2.26	-2.60566	0.010595	1	-2.87946
FOXE3	-0.645358	0.64	-2.60529	0.0106057	1	-2.88031
KRT78	-0.259259	0.07	-2.60459	0.0106259	1	-2.88191
RPL5P4	-7.01776	37.84	-2.603	0.0106721	1	-2.88557
GEM	-2.47438	5.49	-2.60276	0.010679	1	-2.88611
C1QTNF4	-5.44952	17.17	-2.6017	0.0107099	1	-2.88855
JPH1	-0.660071	0.37	-2.60099	0.0107306	1	-2.89017
TMEM143	-23.1664	187.57	-2.59943	0.0107763	1	-2.89375
IGLJ4	-0.524607	0.58	-2.59845	0.010805	1	-2.896
VN1R80P	-5.10807	28.16	-2.59583	0.0108823	1	-2.902
IGKV7-3	-2.18113	4.63	-2.59559	0.0108894	1	-2.90256
RGS16	-5.07915	19.07	-2.59556	0.0108903	1	-2.90262
RN7SL173P	-2.7377	10.52	-2.59275	0.0109737	1	-2.90905
IGKV1OR2-118	-0.841705	0.83	-2.59246	0.0109825	1	-2.90972
ZBTB8OSP2	-0.801624	0.6	-2.59128	0.0110176	1	-2.91241
RPL34P19	-1.03602	1.54	-2.5908	0.0110322	1	-2.91353
LINC01967	-0.297818	0.19	-2.58806	0.0111144	1	-2.91978
GARNL3	-16.0908	101.55	-2.5809	0.0113323	1	-2.93612
BMP3	-7.54541	12.64	-2.57966	0.0113705	1	-2.93895
RNU6-672P	-2.05378	8.76	-2.57801	0.0114212	1	-2.9427
POLR3K	-30.1152	237.09	-2.57576	0.011491	1	-2.94782
GUCY2GP	-1.10705	2.34	-2.57382	0.0115515	1	-2.95224
LYPLAL1-DT	4.14967	11.77	2.56462	0.0118422	1	-2.97314
SKOR1	-5.56621	26.27	-2.56458	0.0118435	1	-2.97323
SIPA1L3	-359.206	2653.15	-2.56336	0.0118823	1	-2.97598
RN7SL337P	-2.31761	5.16	-2.56137	0.0119463	1	-2.98049
AKAIN1	-0.218163	0.1	-2.55996	0.0119917	1	-2.98368
LINC01802	-0.218163	0.1	-2.55996	0.0119917	1	-2.98368
RPS3P4	1.10705	1.66	2.55957	0.0120043	1	-2.98456
SCOCP1	2.62912	9.66	2.55903	0.0120219	1	-2.98579
FSTL4	6.18874	19.74	2.5584	0.0120423	1	-2.98722
ZC3HC1	-30.7149	277.43	-2.55631	0.0121101	1	-2.99194
ZNF454	-1.05378	1.49	-2.55628	0.0121113	1	-2.99202
BCL7A	-87.7879	374.1	-2.55536	0.0121414	1	-2.9941
DPF3	-22.8097	97.46	-2.5551	0.0121498	1	-2.99469
LINC01783	-2.16794	2.01	-2.55497	0.012154	1	-2.99498
TPRXL	-0.70624	1.04	-2.55464	0.0121648	1	-2.99572
POLR2J2	-1.06748	1.48	-2.55331	0.0122083	1	-2.99872
IGHV4-59	-13.7174	24.69	-2.55286	0.012223	1	-2.99973
AKIP1	-21.0903	115.53	-2.55183	0.0122569	1	-3.00205
C17orf99	10.4226	21.09	2.55161	0.0122642	1	-3.00256
RAB6D	1.10604	1.4	2.55158	0.0122651	1	-3.00262
ZDHHC1	-13.8498	68.26	-2.5506	0.0122975	1	-3.00483
CDK2AP1P1	-0.41451	0.29	-2.54916	0.0123451	1	-3.00808
CENPK	172.071	457.13	2.54845	0.0123686	1	-3.00968
SIX4	-0.474886	0.32	-2.54711	0.0124132	1	-3.0127
DTNB-AS1	-1.1309	1.73	-2.54467	0.0124951	1	-3.01821
GPR84-AS1	-0.871639	1.66	-2.54333	0.01254	1	-3.02123
LINC01664	-2.15474	5.39	-2.54314	0.0125462	1	-3.02165
PIK3C2B	-222.235	1395.62	-2.5413	0.0126084	1	-3.02579
FSCN2	-4.9239	15.85	-2.53982	0.0126585	1	-3.02912
RNU6-277P	-0.398275	0.45	-2.5397	0.0126624	1	-3.02938
RALGPS1	-84.0487	804.2	-2.53924	0.012678	1	-3.03041
FAM85B	-4.7382	13.43	-2.53911	0.0126827	1	-3.03072
MIR4685	2.11618	9.73	2.53702	0.0127537	1	-3.03541
ANGPTL4	-0.511923	0.33	-2.53548	0.0128064	1	-3.03887
PLEKHG6	0.859462	1.22	2.53505	0.0128211	1	-3.03983
ACTBP16	-0.334855	0.2	-2.53494	0.0128248	1	-3.04007
BMP8A	-2.58955	3.48	-2.53381	0.0128636	1	-3.04261
LINC01424	-3.29883	13.74	-2.53377	0.012865	1	-3.0427
TTC23L	-1.33638	2.58	-2.53277	0.0128996	1	-3.04495
OLA1P2	-2.59564	3.92	-2.53241	0.012912	1	-3.04576
IGKV1-27	-24.7646	38.07	-2.53239	0.0129125	1	-3.04579
IQCK	-5.36783	25.6	-2.53229	0.0129161	1	-3.04602
HERC2P8	-0.619482	0.77	-2.52957	0.0130104	1	-3.05212
GFRA2	-10.8356	30.09	-2.52707	0.0130973	1	-3.05771
PTPN3	-2.40842	7.39	-2.52679	0.0131074	1	-3.05835
SNORD59A	-2.69914	16.4	-2.52647	0.0131183	1	-3.05905
HERC2P3	-45.5556	133.3	-2.52596	0.0131363	1	-3.0602
IGKV3-15	-33.2501	49.32	-2.52588	0.0131393	1	-3.06039
TTBK1	-0.817352	1.07	-2.52242	0.013261	1	-3.06811
IGHV4-55	-3.2481	3.74	-2.52162	0.0132893	1	-3.0699
TYMSOS	-0.756976	1.04	-2.52144	0.0132955	1	-3.0703
TNRC18P2	-0.622019	0.62	-2.5206	0.0133254	1	-3.07218
HNRNPH1P1	-7.25114	36.04	-2.51947	0.0133655	1	-3.07469
CORO2B	-35.3643	76.11	-2.51781	0.0134249	1	-3.07841
SIGLEC5	83.208	304.39	2.5177	0.0134288	1	-3.07865
NUP133-DT	0.687976	1.28	2.51573	0.0134996	1	-3.08306
ATN1	-21.277	147.69	-2.51281	0.0136046	1	-3.08955
ZFP64	-47.4242	420.01	-2.51072	0.0136807	1	-3.09422
MOGAT2	-0.171487	0.06	-2.5067	0.0138274	1	-3.10315
RPL12P18	-0.171487	0.06	-2.5067	0.0138274	1	-3.10315
HLA-DQA2	-9.15677	18.76	-2.50519	0.013883	1	-3.10651
LMNTD2-AS1	-12.5068	43.87	-2.50474	0.0138995	1	-3.10751
ABTB1	2464.27	15183.7	2.50313	0.0139591	1	-3.11108
RNU6-182P	1.23237	4.27	2.50219	0.0139938	1	-3.11316
IGKV1-5	-181.893	375.44	-2.50075	0.0140475	1	-3.11637
SLC7A3	-2.76104	3.54	-2.49979	0.014083	1	-3.11848
RNA5SP195	-3.2278	18.94	-2.49772	0.0141606	1	-3.12307
DEPDC5	-150.948	1395.66	-2.49599	0.0142258	1	-3.12692
ENPP7P8	-4.51344	10.52	-2.49583	0.0142318	1	-3.12727
PRDM16	2.89498	5.78	2.49566	0.0142378	1	-3.12763
CLCF1	-29.6849	163.33	-2.49434	0.0142878	1	-3.13056
PRMT5-AS1	1.82293	4.59	2.49397	0.014302	1	-3.13139
C18orf21P1	0.360223	0.3	2.49265	0.0143519	1	-3.1343
TCL1A	-364.951	945.66	-2.4919	0.0143802	1	-3.13595
TEN1-CDK3	-4.60071	25.16	-2.49138	0.0144003	1	-3.13711
AVEN	-17.3749	129.02	-2.49092	0.0144176	1	-3.13812
PHKA1	-1.621	3.15	-2.48668	0.0145799	1	-3.14748
MIR4645	-2.0137	7.53	-2.48571	0.0146176	1	-3.14964
FGD1	-0.723998	0.99	-2.48294	0.0147245	1	-3.15573
MIR548AA2	-3.51446	13.99	-2.48054	0.0148179	1	-3.16101
SIGLEC21P	-0.292237	0.12	-2.48054	0.014818	1	-3.16102
OR7E14P	-2.1725	3.34	-2.47564	0.0150108	1	-3.17181
RN7SL615P	-1.44394	4.02	-2.47557	0.0150134	1	-3.17196
COL6A6	0.86758	1.3	2.47397	0.0150768	1	-3.17548
FAR2P3	-0.73313	0.65	-2.47331	0.0151028	1	-3.17692
ZNF793-AS1	-2.44039	8.7	-2.47188	0.0151598	1	-3.18007
LINC00656	4.80771	15.88	2.47174	0.0151656	1	-3.18038
GLRX5P3	-0.363775	0.29	-2.47065	0.0152089	1	-3.18277
DNAAF9	-94.0411	769.35	-2.46953	0.0152537	1	-3.18522
ZRANB2-DT	-2.54795	8.14	-2.46924	0.0152654	1	-3.18586
RN7SKP92	-2.24759	9.1	-2.46858	0.0152919	1	-3.18731
RFPL1S	-6.20446	27.73	-2.46807	0.0153122	1	-3.18842
POLR1G	-12.0274	74.22	-2.46667	0.0153686	1	-3.19149
TNFRSF18	-16.6098	73.06	-2.46518	0.0154291	1	-3.19476
IKZF4	-35.4876	271.02	-2.46509	0.0154325	1	-3.19495
ULK4P2	-1.84373	4.58	-2.46058	0.0156163	1	-3.20482
PLEKHO2	870.521	6068.11	2.45983	0.0156469	1	-3.20646
RBMXP5	-0.934551	1.54	-2.45945	0.0156625	1	-3.20729
THBS3-AS1	-1.52461	3.85	-2.45824	0.0157124	1	-3.20995
ACKR1	57.4094	86.02	2.45705	0.0157616	1	-3.21255
HOXA9	3.7311	12.02	2.45491	0.0158499	1	-3.21721
NDUFAF2P2	-8.57128	45.78	-2.45458	0.0158636	1	-3.21793
MANF	-13.794	73.56	-2.45449	0.0158675	1	-3.21813
RNA5SP345	-0.597666	0.86	-2.45262	0.0159451	1	-3.2222
WNT10B	-16.4769	87.12	-2.45261	0.0159457	1	-3.22224
BOC	0.921867	1.71	2.45157	0.0159891	1	-3.2245
MIR4710	-0.157788	0.07	-2.45155	0.0159898	1	-3.22454
MTND3P23	-0.157788	0.07	-2.45155	0.0159898	1	-3.22454
MAFA	6.44952	18.56	2.44963	0.0160704	1	-3.22873
IGHV3-66	-2.96144	3.69	-2.44528	0.0162537	1	-3.23818
TMEM45B	70.5332	316.23	2.44448	0.0162879	1	-3.23993
IFITM3P1	4.03298	8.87	2.44372	0.01632	1	-3.24157
HRAS	-19.9477	159.29	-2.44332	0.0163371	1	-3.24244
LINC01303	-30.6925	77.15	-2.44281	0.0163591	1	-3.24356
MTND4P12	-100.871	239.92	-2.44269	0.0163642	1	-3.24383
LINC02863	235.93	1061.34	2.44235	0.0163785	1	-3.24456
IGHM	-645.271	1987.73	-2.44222	0.0163841	1	-3.24484
RNU1-77P	-1.14206	2.87	-2.44194	0.0163963	1	-3.24546
ZNF630	-5.30137	15.13	-2.44117	0.0164289	1	-3.24711
FAM224B	-0.474886	0.32	-2.44067	0.0164505	1	-3.24821
ELF5	0.855403	1.18	2.43836	0.0165498	1	-3.25322
RBMS1P1	7.22019	37.53	2.43472	0.0167072	1	-3.2611
OOEPP1	-0.27448	0.17	-2.43399	0.0167392	1	-3.2627
SLC13A5	-0.700152	0.6	-2.4333	0.0167691	1	-3.26418
MIR4742	3.77524	18.83	2.43241	0.0168083	1	-3.26612
RN7SL638P	-1.73415	6.66	-2.4314	0.0168523	1	-3.2683
FGF17	-1.54997	3.35	-2.42774	0.0170134	1	-3.27622
SYCE2	-1.0553	2.6	-2.42734	0.0170309	1	-3.27707
AK4P1	-1.51294	5.34	-2.4258	0.0170991	1	-3.2804
FBXL8	-21.7509	162.27	-2.42382	0.0171871	1	-3.28467
LMO1	-0.330797	0.24	-2.42334	0.0172087	1	-3.28572
LINC01140	1.98224	5.41	2.42245	0.0172483	1	-3.28763
TNRC6B-DT	2.01065	4.69	2.41926	0.0173916	1	-3.29451
SMARCAL1	-88.2664	821.01	-2.41818	0.0174404	1	-3.29684
POU3F1	-1.931	4.22	-2.41745	0.0174734	1	-3.29841
IGHV3-53	-10.484	15.68	-2.41649	0.0175168	1	-3.30047
PITPNM2-AS1	-0.568747	0.77	-2.41584	0.0175461	1	-3.30186
COX5BP6	-2.35058	9.21	-2.41568	0.0175537	1	-3.30223
YBX1P8	-3.2278	8.94	-2.41478	0.0175947	1	-3.30416
PFKP	-145.988	1201.54	-2.41465	0.0176005	1	-3.30444
ZNF567-DT	-13.0797	99.6	-2.41432	0.0176154	1	-3.30514
NUDC	-63.0178	577.96	-2.41413	0.0176241	1	-3.30555
NUTM2G	-0.377473	0.28	-2.41396	0.017632	1	-3.30592
CFAP144P2	-0.194825	0.08	-2.41392	0.0176337	1	-3.30601
POTEE	-0.194825	0.08	-2.41392	0.0176337	1	-3.30601
TRNP1	-7.5175	23.29	-2.41314	0.0176695	1	-3.30769
TRMT10B	-35.0614	330.22	-2.41216	0.0177142	1	-3.30979
RNU6-1150P	-0.313039	0.29	-2.41048	0.0177912	1	-3.31339
ARMH1	-47.8468	342.22	-2.40633	0.017983	1	-3.3223
CA4	121.247	385.14	2.40292	0.018142	1	-3.32962
RN7SKP6	0.64485	0.73	2.40254	0.0181595	1	-3.33042
CEACAM3	211.398	906.58	2.40159	0.0182041	1	-3.33245
CENPP	-43.7078	194.76	-2.39887	0.0183322	1	-3.33828
NECTIN3-AS1	0.828513	1.79	2.39861	0.0183444	1	-3.33883
SURF6	-11.8316	74.4	-2.3973	0.0184066	1	-3.34164
ANKRD30B	-0.410452	0.33	-2.39685	0.0184277	1	-3.34259
LINC02975	64.206	329.5	2.39684	0.0184283	1	-3.34262
GOLGA8H	-3.483	10.05	-2.39683	0.0184287	1	-3.34264
RPL15P6	-0.218163	0.1	-2.39532	0.0185004	1	-3.34586
ASS1P12	-0.148148	0.04	-2.39492	0.0185198	1	-3.34673
BARHL1	-0.148148	0.04	-2.39492	0.0185198	1	-3.34673
CCNJP2	-0.148148	0.04	-2.39492	0.0185198	1	-3.34673
CHRDL2	-0.148148	0.04	-2.39492	0.0185198	1	-3.34673
CNN2P7	-0.148148	0.04	-2.39492	0.0185198	1	-3.34673
CSRP2P2	-0.148148	0.04	-2.39492	0.0185198	1	-3.34673
CUBNP1	-0.148148	0.04	-2.39492	0.0185198	1	-3.34673
CXADRP3	-0.148148	0.04	-2.39492	0.0185198	1	-3.34673
GMNC	-0.148148	0.04	-2.39492	0.0185198	1	-3.34673
HNRNPA1P65	-0.148148	0.04	-2.39492	0.0185198	1	-3.34673
HSD17B7P1	-0.148148	0.04	-2.39492	0.0185198	1	-3.34673
IL1RAPL1	-0.148148	0.04	-2.39492	0.0185198	1	-3.34673
KRTAP5-5	-0.148148	0.04	-2.39492	0.0185198	1	-3.34673
LUARIS	-0.148148	0.04	-2.39492	0.0185198	1	-3.34673
MIR3663HG	-0.148148	0.04	-2.39492	0.0185198	1	-3.34673
MROH5	-0.148148	0.04	-2.39492	0.0185198	1	-3.34673
MTND2P5	-0.148148	0.04	-2.39492	0.0185198	1	-3.34673
MTND5P1	-0.148148	0.04	-2.39492	0.0185198	1	-3.34673
MYG1P1	-0.148148	0.04	-2.39492	0.0185198	1	-3.34673
OR52E8	-0.148148	0.04	-2.39492	0.0185198	1	-3.34673
OR7E33P	-0.148148	0.04	-2.39492	0.0185198	1	-3.34673
PIP5K1P1	-0.148148	0.04	-2.39492	0.0185198	1	-3.34673
PPY2P	-0.148148	0.04	-2.39492	0.0185198	1	-3.34673
PSMC1P10	-0.148148	0.04	-2.39492	0.0185198	1	-3.34673
RACGAP1P1	-0.148148	0.04	-2.39492	0.0185198	1	-3.34673
RCN1P1	-0.148148	0.04	-2.39492	0.0185198	1	-3.34673
RPL17P26	-0.148148	0.04	-2.39492	0.0185198	1	-3.34673
RPL27P8	-0.148148	0.04	-2.39492	0.0185198	1	-3.34673
RPL29P7	-0.148148	0.04	-2.39492	0.0185198	1	-3.34673
RPL7AP12	-0.148148	0.04	-2.39492	0.0185198	1	-3.34673
TYMSP2	-0.148148	0.04	-2.39492	0.0185198	1	-3.34673
VDAC1P7	-0.148148	0.04	-2.39492	0.0185198	1	-3.34673
AKIRIN2P1	-0.0740741	0.02	-2.39328	0.018598	1	-3.35022
APOA5	-0.0740741	0.02	-2.39328	0.018598	1	-3.35022
BBS7-DT	-0.0740741	0.02	-2.39328	0.018598	1	-3.35022
CLMAT3	-0.0740741	0.02	-2.39328	0.018598	1	-3.35022
IGKV2-36	-0.0740741	0.02	-2.39328	0.018598	1	-3.35022
KRT76	-0.0740741	0.02	-2.39328	0.018598	1	-3.35022
LINC01249	-0.0740741	0.02	-2.39328	0.018598	1	-3.35022
LINC01845	-0.0740741	0.02	-2.39328	0.018598	1	-3.35022
LINC02549	-0.0740741	0.02	-2.39328	0.018598	1	-3.35022
LINC02703	-0.0740741	0.02	-2.39328	0.018598	1	-3.35022
LINC02758	-0.0740741	0.02	-2.39328	0.018598	1	-3.35022
MIR5702	-0.0740741	0.02	-2.39328	0.018598	1	-3.35022
NEUROG2-AS1	-0.0740741	0.02	-2.39328	0.018598	1	-3.35022
P4HA3-AS1	-0.0740741	0.02	-2.39328	0.018598	1	-3.35022
RN7SKP83	-0.0740741	0.02	-2.39328	0.018598	1	-3.35022
RN7SL332P	-0.0740741	0.02	-2.39328	0.018598	1	-3.35022
RN7SL96P	-0.0740741	0.02	-2.39328	0.018598	1	-3.35022
RNA5SP95	-0.0740741	0.02	-2.39328	0.018598	1	-3.35022
RNU1-24P	-0.0740741	0.02	-2.39328	0.018598	1	-3.35022
RNU6-1154P	-0.0740741	0.02	-2.39328	0.018598	1	-3.35022
RNU6-1301P	-0.0740741	0.02	-2.39328	0.018598	1	-3.35022
RNU6-35P	-0.0740741	0.02	-2.39328	0.018598	1	-3.35022
RNU6-831P	-0.0740741	0.02	-2.39328	0.018598	1	-3.35022
RNU6ATAC32P	-0.0740741	0.02	-2.39328	0.018598	1	-3.35022
RNU6V	-0.0740741	0.02	-2.39328	0.018598	1	-3.35022
SNRPCP15	-0.0740741	0.02	-2.39328	0.018598	1	-3.35022
UQCRHP2	-0.0740741	0.02	-2.39328	0.018598	1	-3.35022
FAM201B	-0.711314	0.74	-2.39192	0.0186632	1	-3.35313
RASA3-IT1	-22.9645	138.31	-2.39054	0.0187295	1	-3.35607
RBMXP4	-1.05936	2.56	-2.3899	0.0187603	1	-3.35743
HNRNPA1P25	-0.381532	0.24	-2.3895	0.0187794	1	-3.35828
DOK4	40.619	144.8	2.38801	0.0188516	1	-3.36146
SF3A3	-172.667	1431.99	-2.38725	0.0188884	1	-3.36308
COL25A1	1.73871	5.01	2.38716	0.0188924	1	-3.36325
SMAD3-DT	-0.340436	0.27	-2.38591	0.0189534	1	-3.36593
TMEM120B	-31.9523	259.86	-2.3852	0.0189881	1	-3.36744
UBE2D3P2	1.98985	5.86	2.38508	0.018994	1	-3.3677
RNU6-1010P	-4.35819	19.3	-2.38356	0.0190682	1	-3.37093
SNHG31	-1.75799	4.05	-2.38317	0.0190868	1	-3.37174
INHA	-0.338914	0.16	-2.3828	0.0191053	1	-3.37255
TPBGL	-2.16996	6.49	-2.38277	0.0191068	1	-3.37261
TBX19	-24.3876	215.16	-2.38188	0.0191505	1	-3.3745
CACNG8	-31.5916	70.79	-2.38093	0.0191967	1	-3.3765
SLC29A2	-22.5205	140.56	-2.3808	0.0192032	1	-3.37679
ACTN1-DT	7.11111	36.08	2.37976	0.0192547	1	-3.379
GHRL	56.0147	286.15	2.37782	0.0193503	1	-3.38311
NIBAN3	-401.008	1590.19	-2.37624	0.0194288	1	-3.38646
B3GNT8	249.698	1256.02	2.37562	0.0194595	1	-3.38777
TOP6BL	-46.1202	267.11	-2.37556	0.0194628	1	-3.38791
CCR4	-180.811	1176.86	-2.37527	0.019477	1	-3.38852
LINC00630	-16.83	114.64	-2.37392	0.0195447	1	-3.39139
RNU6-474P	-0.781837	1.17	-2.37391	0.0195448	1	-3.3914
RPL10P15	-1.02892	2.36	-2.37275	0.0196032	1	-3.39387
TRAPPC14	284.149	2395.91	2.37056	0.019713	1	-3.3985
CXCL6	8.82445	26.59	2.36911	0.0197862	1	-3.40156
CSTF3-DT	-2.73922	12.63	-2.3671	0.0198881	1	-3.40582
RNU6-485P	-1.31355	4.93	-2.36682	0.0199025	1	-3.40642
GGA2	-373.945	2937.65	-2.36594	0.0199472	1	-3.40827
SETP11	0.833587	1.09	2.36549	0.0199697	1	-3.40921
CROCCP2	-206.47	1219.24	-2.36471	0.0200097	1	-3.41087
MRPL42P6	-1.00609	0.71	-2.36445	0.020023	1	-3.41142
AATK	850.855	4064.68	2.3634	0.0200766	1	-3.41363
ARHGAP22	-17.4734	91.8	-2.36326	0.0200837	1	-3.41392
MICALL2-DT	-1.51294	4.34	-2.36088	0.0202059	1	-3.41894
LARGE2	-46.2532	209.05	-2.36073	0.0202136	1	-3.41926
RIMS2	-0.867073	1.33	-2.36057	0.0202222	1	-3.41961
DSCAML1	-5.13546	19.14	-2.36054	0.0202237	1	-3.41967
RPS27AP1	-0.400812	0.3	-2.36051	0.020225	1	-3.41973
APOBEC3D	-85.9447	726.89	-2.35985	0.0202588	1	-3.42111
SLC2A14	25.3907	53.35	2.3597	0.0202666	1	-3.42143
CHST15	2760.91	16170.8	2.35891	0.0203077	1	-3.4231
SNTG2-AS1	-1.793	3.58	-2.3588	0.0203132	1	-3.42333
PPP4R1	1009.85	6600.6	2.35841	0.0203336	1	-3.42416
WLS	789.757	2372.56	2.35787	0.0203612	1	-3.42528
SH3BP4	-19.5124	90.83	-2.35736	0.020388	1	-3.42637
AFG3L1P	-76.6038	728.82	-2.35716	0.0203984	1	-3.42679
CROCCP3	-80.3039	596.23	-2.35611	0.0204527	1	-3.42899
PAOX	-29.7707	204.86	-2.35572	0.020473	1	-3.42981
TEX14	-3.73871	13.53	-2.35492	0.020515	1	-3.4315
EIF5AP4	0.377981	0.35	2.35387	0.0205696	1	-3.4337
MILIP	-2.43734	5.48	-2.35306	0.0206121	1	-3.43541
GRAMD4	-132.246	1098.09	-2.35111	0.0207143	1	-3.4395
LIMD1	-342.677	2986.29	-2.35081	0.0207301	1	-3.44013
ENTREP1	-0.862506	1	-2.34793	0.0208825	1	-3.44619
UNC119	278.532	2621.81	2.347	0.0209316	1	-3.44813
RN7SL363P	-0.181126	0.09	-2.34573	0.0209994	1	-3.4508
ENTHD1	1.84982	4.98	2.34558	0.0210075	1	-3.45112
COX6B1P4	-0.185185	0.05	-2.34501	0.0210377	1	-3.45231
MAGEF1	-32.9239	200.41	-2.3448	0.0210487	1	-3.45274
MIR551A	0.339422	0.47	2.34301	0.0211444	1	-3.45649
ZNF23	-9.06342	68.68	-2.34215	0.0211909	1	-3.4583
C22orf46P	-22.1187	160.52	-2.34116	0.0212439	1	-3.46037
PPP4R1-AS1	3.67377	16.83	2.34086	0.0212603	1	-3.46101
TEDC2-AS1	-4.73973	18.54	-2.34082	0.0212624	1	-3.46109
GOLGA3	-354.372	3202.16	-2.3395	0.0213334	1	-3.46384
C11orf98P2	-0.13445	0.05	-2.33934	0.0213418	1	-3.46417
LINC02037	-0.13445	0.05	-2.33934	0.0213418	1	-3.46417
LINC02443	-0.13445	0.05	-2.33934	0.0213418	1	-3.46417
LRRC37A11P	-0.13445	0.05	-2.33934	0.0213418	1	-3.46417
MIR5695	-0.13445	0.05	-2.33934	0.0213418	1	-3.46417
WTAPP1	-0.13445	0.05	-2.33934	0.0213418	1	-3.46417
DENND5B	-112.885	431.89	-2.33864	0.02138	1	-3.46564
LINC03100	-6.41045	20.95	-2.33788	0.0214211	1	-3.46723
SNRPCP8	-0.321157	0.21	-2.33742	0.0214458	1	-3.46818
TMEM217	3.28615	11.51	2.33671	0.0214844	1	-3.46967
IL1RL1	-131.672	302.62	-2.3351	0.0215725	1	-3.47305
LINC01013	-21.1761	44.06	-2.33504	0.0215755	1	-3.47316
FAM157B	61.6225	324.54	2.33405	0.0216298	1	-3.47524
PIK3CD-AS1	12.2659	74.88	2.33225	0.0217283	1	-3.47899
A4GALT	-17.8904	18.94	-2.33131	0.0217797	1	-3.48094
RNU6-1152P	-3.63927	18.01	-2.33116	0.0217882	1	-3.48126
EPCAM-DT	-0.80619	0.93	-2.33076	0.0218101	1	-3.48209
IRF4	-369.459	1478.48	-2.33015	0.0218439	1	-3.48337
RGS17	8.46271	19.4	2.32981	0.0218628	1	-3.48408
ADAM23	-37.5251	144.94	-2.32952	0.0218785	1	-3.48467
LINC02585	-0.266362	0.25	-2.32792	0.0219673	1	-3.48802
RN7SL375P	-0.204465	0.11	-2.32564	0.0220937	1	-3.49275
CHMP4A	-12.2024	102.87	-2.32342	0.022218	1	-3.49738
HLA-DOA	-20.7996	90.52	-2.32331	0.0222238	1	-3.4976
NOMO1	-56.2806	377.73	-2.3222	0.0222861	1	-3.49991
SOX5	-12.8889	41.48	-2.32211	0.0222911	1	-3.50009
IDO2	-2.95079	9.92	-2.32193	0.0223015	1	-3.50048
CARD10	1.49569	3.24	2.32112	0.0223466	1	-3.50214
SLC4A8	-50.9599	283.54	-2.31964	0.0224303	1	-3.50523
MMADHCP2	-7.54287	21.79	-2.31889	0.0224729	1	-3.50679
MIR624	-2.88077	10.86	-2.31828	0.0225074	1	-3.50806
S100P	200.946	509.95	2.31769	0.0225405	1	-3.50927
SLC2A1-DT	13.6829	62.47	2.31722	0.0225675	1	-3.51025
CYP4F11	-0.634196	0.5	-2.31714	0.0225719	1	-3.51041
RN7SKP16	53.4338	292.34	2.31663	0.0226007	1	-3.51147
RN7SL204P	-1.08727	1.91	-2.31581	0.0226476	1	-3.51318
ASB2	-38.7352	153.39	-2.31578	0.0226488	1	-3.51322
RN7SL543P	1.05581	2.03	2.31468	0.022712	1	-3.51552
OR2W2P	-0.292237	0.12	-2.31432	0.0227326	1	-3.51626
MIR744	3.11416	19.94	2.31369	0.0227681	1	-3.51755
GOLGA2P8	-1	2.27	-2.31297	0.0228096	1	-3.51905
KCNJ1	-0.950279	1.01	-2.31193	0.0228694	1	-3.52121
TRBV7-6	-2.23288	4.37	-2.31157	0.0228901	1	-3.52195
LPP-AS2	22.9249	150.55	2.3115	0.0228942	1	-3.5221
HMGN2P15	-0.363775	0.29	-2.31103	0.022921	1	-3.52307
KCNA2	-9.04059	44.03	-2.30959	0.0230039	1	-3.52604
ERGIC1	1279.04	9897.48	2.30741	0.0231301	1	-3.53055
CDRT15P12	-0.350076	0.3	-2.30717	0.0231438	1	-3.53104
ACSF2	-47.6256	325.9	-2.30669	0.0231721	1	-3.53204
H2BC20P	1.9518	2.61	2.30658	0.0231781	1	-3.53226
PCDHGB6	8.06951	28.15	2.30629	0.0231952	1	-3.53286
CHP1P2	264.091	1727.49	2.3059	0.0232181	1	-3.53367
RPL31P52	2.06697	8.62	2.30498	0.0232716	1	-3.53557
PMFBP1	-8.55809	39.16	-2.30497	0.0232722	1	-3.53559
TRIB1AL	-2.65601	4.95	-2.30486	0.0232783	1	-3.53581
CCNA1	-6.27194	11.94	-2.30472	0.0232865	1	-3.5361
CIITA	-1277.16	8166.3	-2.30458	0.023295	1	-3.5364
TLE1-DT	-1.79452	4.69	-2.30296	0.0233898	1	-3.53974
GCSH	-2.92035	13.72	-2.30227	0.0234298	1	-3.54115
NHSL1-AS1	-4.74277	19.76	-2.30113	0.0234972	1	-3.54352
HEXA	-136.753	1430.17	-2.2997	0.0235815	1	-3.54647
HNRNPM	-314.177	2976.54	-2.29969	0.0235819	1	-3.54648
CLDN23	-2.04363	6.36	-2.29869	0.0236409	1	-3.54854
ERP29P1	-1.65297	4.46	-2.2969	0.0237468	1	-3.55222
ALDH1A3	-0.241502	0.12	-2.29667	0.0237604	1	-3.55268
RPL8P2	-0.241502	0.12	-2.29667	0.0237604	1	-3.55268
RPLP0P12	-0.241502	0.12	-2.29667	0.0237604	1	-3.55268
SPCS2P1	-0.241502	0.12	-2.29667	0.0237604	1	-3.55268
DISP1	-21.3612	178.11	-2.29651	0.0237704	1	-3.55303
RPL29P16	-1.69305	4.69	-2.29616	0.0237907	1	-3.55373
IGHV3-32	-0.120751	0.06	-2.29613	0.0237927	1	-3.5538
LCN6	-0.120751	0.06	-2.29613	0.0237927	1	-3.5538
RHEBP3	-0.120751	0.06	-2.29613	0.0237927	1	-3.5538
CR2	-70.4901	334.32	-2.29423	0.023906	1	-3.55771
COL17A1	8.65804	11.95	2.29416	0.0239103	1	-3.55786
HMGN2P41	-0.952816	2.86	-2.29385	0.0239287	1	-3.55849
MRPL42P2	-0.732623	1.28	-2.29367	0.0239395	1	-3.55886
CCDC191	-47.6449	331.96	-2.29242	0.0240145	1	-3.56144
HLA-W	-2.52258	4.64	-2.29214	0.0240308	1	-3.562
ALOX15P2	-0.500761	0.19	-2.29193	0.0240437	1	-3.56244
ZNF582-DT	-5.12177	26.15	-2.29189	0.0240459	1	-3.56251
CDCA7L	-137.38	689.12	-2.29171	0.024057	1	-3.56289
CYB5A	-49.6372	343.95	-2.29164	0.024061	1	-3.56303
RHOB	632.499	3848.28	2.29157	0.0240654	1	-3.56318
PDE8A	-108.619	1015.56	-2.29141	0.024075	1	-3.56351
ZDHHC18	2139.31	13641	2.29089	0.0241064	1	-3.56458
PRDM10-DT	4.56164	29.33	2.2904	0.0241357	1	-3.56558
ZNF687-AS1	4.19127	22.43	2.28633	0.0243817	1	-3.57392
PHC2	1632.57	9011.44	2.28607	0.0243979	1	-3.57446
SOWAHD	52.761	364.96	2.28563	0.0244242	1	-3.57535
RPL21P3	-1.58143	4.29	-2.28542	0.0244371	1	-3.57579
RBM6	-314.036	2778.05	-2.28484	0.0244723	1	-3.57697
RNU6-189P	-0.270421	0.21	-2.28384	0.0245336	1	-3.57902
LGSN	11.9031	22.43	2.28295	0.0245883	1	-3.58085
DENND3-AS1	12.9538	76.16	2.28241	0.0246208	1	-3.58194
IGKV1D-43	-1.92593	3.52	-2.28165	0.0246677	1	-3.5835
NKX6-3	-2.02689	3.15	-2.28056	0.0247345	1	-3.58573
LINC02614	-7.34703	36.97	-2.28016	0.0247595	1	-3.58656
CCDC8	-0.334855	0.2	-2.27945	0.0248031	1	-3.588
WWOX	-37.4444	303.11	-2.27662	0.0249781	1	-3.59378
PELATON	518.836	3398.38	2.27493	0.0250831	1	-3.59723
PPIAP45	-8.09944	13.68	-2.27418	0.02513	1	-3.59876
CLCN6	-96.1801	918.27	-2.27402	0.0251401	1	-3.59909
LSMEM1	59.8128	299.33	2.27357	0.0251682	1	-3.60001
EEF1A1P1	-0.662608	1.22	-2.27346	0.0251751	1	-3.60023
EYS	12.2334	48.56	2.27314	0.0251949	1	-3.60088
IGKJ5	-17.3729	43.54	-2.27281	0.0252154	1	-3.60155
FMC1	-4.06443	26.07	-2.27253	0.0252335	1	-3.60213
PRELID1P1	-2.3105	6.98	-2.27206	0.0252626	1	-3.60308
BBC3	111.413	854.48	2.27151	0.0252973	1	-3.60421
NKAPP1	-2.20852	9.61	-2.2697	0.0254107	1	-3.60788
SCARB1	-59.5322	427.06	-2.26944	0.0254275	1	-3.60842
CGN	-2.47996	8.56	-2.26905	0.0254522	1	-3.60922
IGHV1-68	-0.171487	0.06	-2.26885	0.0254648	1	-3.60963
TMEM198	-2.06748	5.75	-2.26859	0.0254809	1	-3.61015
H3P16	2.32725	7.81	2.26829	0.0255002	1	-3.61077
CASC11	-1.49366	4.28	-2.26772	0.0255363	1	-3.61193
C15orf39	1955.75	17046.1	2.26743	0.0255541	1	-3.6125
THAP4	-47.1573	549.39	-2.26367	0.0257932	1	-3.62014
NCOA4P2	-0.711314	0.74	-2.26341	0.02581	1	-3.62068
SETP2	-0.222222	0.06	-2.26329	0.0258174	1	-3.62091
PDIA6	-266.166	1721.18	-2.26298	0.0258373	1	-3.62154
BID	330.752	3025.56	2.26277	0.0258513	1	-3.62199
APOOP3	-0.111111	0.03	-2.26268	0.0258568	1	-3.62216
BNIP3P27	-0.111111	0.03	-2.26268	0.0258568	1	-3.62216
FRMPD2B	-0.111111	0.03	-2.26268	0.0258568	1	-3.62216
HMGN1P7	-0.111111	0.03	-2.26268	0.0258568	1	-3.62216
IGKV3D-25	-0.111111	0.03	-2.26268	0.0258568	1	-3.62216
KLHL6-AS1	-0.111111	0.03	-2.26268	0.0258568	1	-3.62216
KLK7	-0.111111	0.03	-2.26268	0.0258568	1	-3.62216
KRT8P49	-0.111111	0.03	-2.26268	0.0258568	1	-3.62216
LINC02691	-0.111111	0.03	-2.26268	0.0258568	1	-3.62216
LINC02914	-0.111111	0.03	-2.26268	0.0258568	1	-3.62216
LINC03095	-0.111111	0.03	-2.26268	0.0258568	1	-3.62216
MANCR	-0.111111	0.03	-2.26268	0.0258568	1	-3.62216
MSL3P2	-0.111111	0.03	-2.26268	0.0258568	1	-3.62216
MYLKP1	-0.111111	0.03	-2.26268	0.0258568	1	-3.62216
PNPLA5	-0.111111	0.03	-2.26268	0.0258568	1	-3.62216
RNU5E-8P	-0.111111	0.03	-2.26268	0.0258568	1	-3.62216
RPL32P25	-0.111111	0.03	-2.26268	0.0258568	1	-3.62216
RPS20P24	-0.111111	0.03	-2.26268	0.0258568	1	-3.62216
RPS29P8	-0.111111	0.03	-2.26268	0.0258568	1	-3.62216
SHC1P1	-0.111111	0.03	-2.26268	0.0258568	1	-3.62216
TAS2R42	-0.111111	0.03	-2.26268	0.0258568	1	-3.62216
IRAG1	535.434	2690.83	2.26202	0.0258992	1	-3.62351
KATNBL1P3	0.465753	0.34	2.26116	0.025954	1	-3.62524
LSM3P5	-0.866565	1.96	-2.25877	0.0261077	1	-3.63009
ARRDC5	-53.553	384.61	-2.25877	0.0261081	1	-3.6301
MIR4422HG	-1.2486	2.57	-2.25876	0.0261089	1	-3.63012
SFTPA1	-0.27448	0.17	-2.25755	0.0261866	1	-3.63256
CYCSP25	0.273973	0.2	2.25751	0.0261897	1	-3.63266
UPF3A	-55.2653	431.36	-2.25739	0.0261973	1	-3.6329
HYOU1	-104.923	648.48	-2.2569	0.0262288	1	-3.63388
ETF1P2	0.315068	0.23	2.25649	0.0262554	1	-3.63471
LIMK2P1	0.315068	0.23	2.25649	0.0262554	1	-3.63471
ITGA2-AS1	-0.572298	0.36	-2.25637	0.026263	1	-3.63495
ADAM30	-0.381532	0.24	-2.25633	0.0262655	1	-3.63503
NPR3	5.16388	14.14	2.25558	0.0263142	1	-3.63655
RN7SL7P	1.29883	2.8	2.25454	0.0263823	1	-3.63867
CAPN13	6.37139	14.54	2.25426	0.0264002	1	-3.63922
STEAP1B-AS1	-1.12278	1.81	-2.254	0.0264175	1	-3.63976
CIMIP2A	-0.849315	1.38	-2.25245	0.0265184	1	-3.64288
ZNF395	-100.142	943.6	-2.25185	0.0265581	1	-3.64411
NUCB1-AS1	-0.467275	0.77	-2.2516	0.0265744	1	-3.64461
PCNPP5	0.717402	0.82	2.25152	0.0265794	1	-3.64477
KIAA0319	66.5474	296.95	2.25131	0.0265935	1	-3.6452
PREX2	1.03399	1.94	2.25118	0.0266018	1	-3.64546
ZC3HAV1L	-12.3998	71.8	-2.24976	0.0266952	1	-3.64833
SYNJ2-IT1	-2.24252	9.4	-2.24936	0.0267212	1	-3.64913
CDC42EP2	393.888	2486.39	2.24908	0.0267399	1	-3.6497
NPAP1P6	-0.936073	1.65	-2.24906	0.0267412	1	-3.64974
KLRG2	-0.495687	0.49	-2.24814	0.026802	1	-3.6516
SEC61G-DT	-1.01522	2.37	-2.24796	0.0268137	1	-3.65196
IRAG1-AS1	19.7555	91.94	2.24744	0.0268483	1	-3.65301
KPNA7	-0.499746	0.45	-2.24659	0.0269046	1	-3.65473
SMG1P1	-77.4343	591.51	-2.24576	0.0269596	1	-3.6564
FGFR2	-25.0776	83.36	-2.2453	0.0269897	1	-3.65732
ACTG1P12	-0.466768	0.4	-2.24513	0.0270014	1	-3.65767
CYP2C18	0.356164	0.26	2.24502	0.0270086	1	-3.65789
ACOT4	-6.60223	24.81	-2.24428	0.0270579	1	-3.65938
HMGN1P38	3.66819	7.9	2.24426	0.0270591	1	-3.65942
NFE2L3P1	-0.44343	0.38	-2.24305	0.0271401	1	-3.66187
COPRS	-10.1684	76.54	-2.24274	0.0271602	1	-3.66248
ANKRD20A8P	-0.194825	0.08	-2.24268	0.0271644	1	-3.6626
HNRNPABP1	-0.194825	0.08	-2.24268	0.0271644	1	-3.6626
KCTD9P6	-0.194825	0.08	-2.24268	0.0271644	1	-3.6626
OR7E108P	-0.194825	0.08	-2.24268	0.0271644	1	-3.6626
RNU2-14P	-0.194825	0.08	-2.24268	0.0271644	1	-3.6626
RPL7P17	-0.194825	0.08	-2.24268	0.0271644	1	-3.6626
SPATA8	-0.194825	0.08	-2.24268	0.0271644	1	-3.6626
SSBP3P3	-0.194825	0.08	-2.24268	0.0271644	1	-3.6626
TBX10	-0.194825	0.08	-2.24268	0.0271644	1	-3.6626
PGGHG	1007.64	7474.69	2.24231	0.027189	1	-3.66334
NTRK2	1.64992	3.76	2.24227	0.027192	1	-3.66343
IGLVVI-22-1	-0.0974125	0.04	-2.2419	0.0272164	1	-3.66417
MED14P1	-0.0974125	0.04	-2.2419	0.0272164	1	-3.66417
MSH5-SAPCD1	-0.0974125	0.04	-2.2419	0.0272164	1	-3.66417
MTND4LP14	-0.0974125	0.04	-2.2419	0.0272164	1	-3.66417
RNU7-49P	-0.0974125	0.04	-2.2419	0.0272164	1	-3.66417
ZSCAN2	-30.1522	257.1	-2.23951	0.0273772	1	-3.66899
AHI1	-70.691	310.84	-2.23921	0.0273975	1	-3.6696
RNF19B	644.794	4953.07	2.23903	0.0274094	1	-3.66995
NCAPG2	-234.998	420.97	-2.23767	0.027501	1	-3.67268
EPHB2	-47.6454	120.33	-2.23756	0.0275083	1	-3.6729
IGLL5	-24.9528	69.34	-2.23745	0.0275162	1	-3.67314
APLN	0.460173	0.41	2.23608	0.0276084	1	-3.67587
PPP2R5A	766.635	5041.31	2.23507	0.0276769	1	-3.6779
GLDCP1	-0.377473	0.28	-2.23272	0.0278372	1	-3.68263
CD200R1L	-3.09843	5.59	-2.23232	0.0278645	1	-3.68343
TUNAR	-3.30137	7.59	-2.23136	0.0279301	1	-3.68535
PAM	-314.59	1319.72	-2.23061	0.0279817	1	-3.68686
BMPR1B	1.4277	2.82	2.22891	0.0280982	1	-3.69026
TRIM7-AS1	1.89041	8.38	2.22888	0.0281002	1	-3.69032
MIR3135A	-1.45967	6.49	-2.22833	0.0281383	1	-3.69143
PPIAP59	-0.39929	0.19	-2.22711	0.0282225	1	-3.69387
ESRRAP1	-0.732623	1.28	-2.22704	0.0282275	1	-3.69401
OR7E130P	-0.227803	0.13	-2.22556	0.0283297	1	-3.69697
EIPR1	-52.0041	563	-2.22489	0.0283764	1	-3.69831
RPS7P6	-0.613902	0.7	-2.22392	0.0284438	1	-3.70026
ACSS3	8.72248	32.96	2.22307	0.0285025	1	-3.70194
NCKAP5	-2.91629	9.76	-2.22179	0.0285919	1	-3.7045
GOLGA6L23P	-0.564688	0.81	-2.22173	0.0285961	1	-3.70462
SNORD116-5	-0.479452	0.65	-2.22133	0.0286239	1	-3.70541
DNALI1	-1.22222	2.33	-2.22065	0.028672	1	-3.70679
KHK	-11.3643	68.63	-2.22016	0.0287058	1	-3.70775
RN7SL515P	0.630644	1.09	2.2195	0.0287523	1	-3.70907
CD70	-5.73009	21.78	-2.21917	0.0287757	1	-3.70973
SEL1L3	-543.351	3288.28	-2.21884	0.0287989	1	-3.71039
SLC10A1	-0.45865	0.48	-2.21793	0.0288629	1	-3.71221
CEP112	-8.2826	40.25	-2.21716	0.0289172	1	-3.71374
DACT3-AS1	-0.373415	0.32	-2.21553	0.0290328	1	-3.717
OLFM3	-0.307458	0.22	-2.21542	0.02904	1	-3.7172
KIAA0825	234.944	1369.25	2.21532	0.029047	1	-3.7174
CAMP	81.7174	155.95	2.21428	0.0291207	1	-3.71947
FGF13-AS1	0.868087	0.93	2.21426	0.0291223	1	-3.71952
ACOT2	-12.0903	87.1	-2.21382	0.0291535	1	-3.72039
RNU6-758P	-0.623034	1.36	-2.21379	0.0291561	1	-3.72046
TAMALIN	-23.1654	161.83	-2.21377	0.0291577	1	-3.72051
IGLV5-37	-4.74683	5.72	-2.21304	0.029209	1	-3.72194
FLVCR2	-62.1071	354.81	-2.21073	0.0293742	1	-3.72655
EML6	-49.0167	182.44	-2.21059	0.0293844	1	-3.72683
RASAL1	-2.39066	6.44	-2.20914	0.0294878	1	-3.7297
RUSC1-AS1	-17.2851	167.53	-2.20902	0.0294963	1	-3.72993
SNORA70E	-2.66312	10.13	-2.2087	0.0295198	1	-3.73058
LINC01798	0.332826	0.28	2.20859	0.0295273	1	-3.73079
DEFA3	254.922	336.13	2.20785	0.0295805	1	-3.73226
MIR574	0.558092	1	2.20678	0.0296578	1	-3.73439
OSGIN1	15.175	92.3	2.20623	0.0296975	1	-3.73548
DOCK6	-12.3014	55.02	-2.20464	0.0298126	1	-3.73864
HLF	-11.5094	60.45	-2.20426	0.0298404	1	-3.7394
UNC13C	-0.540842	0.42	-2.2042	0.0298444	1	-3.73951
TRGJ2	0.940132	2.39	2.20401	0.0298582	1	-3.73988
OR7H2P	-0.336377	0.31	-2.20273	0.0299515	1	-3.74243
STUM	0.879756	1.42	2.20208	0.0299986	1	-3.74371
PGAM1P6	-6.12633	47.75	-2.20168	0.0300281	1	-3.74451
PIK3CD-AS2	-1.16489	2.52	-2.20153	0.0300387	1	-3.7448
IGKV6D-21	-3.08929	2.93	-2.20126	0.0300582	1	-3.74533
CBLL1-AS1	8.33181	43.86	2.20045	0.030118	1	-3.74695
CFAP61-AS1	-0.406393	0.37	-2.20044	0.0301186	1	-3.74697
CAMTA1	-46.9919	400.77	-2.20008	0.0301448	1	-3.74768
GSTM4	-66.8508	287.31	-2.20002	0.0301494	1	-3.7478
UBTD1	50.76	329.24	2.19922	0.0302078	1	-3.74938
FMN1	-445.123	1176.06	-2.19906	0.0302193	1	-3.74969
PMF1	-34.7362	456.05	-2.19898	0.030225	1	-3.74984
RN7SL466P	0.305429	0.26	2.19772	0.0303176	1	-3.75234
LRP10	3667.69	26077.5	2.19735	0.0303452	1	-3.75308
EEF2K	-130.574	984.57	-2.19721	0.0303554	1	-3.75335
HSPA7	-237.646	849	-2.19706	0.0303666	1	-3.75365
TNFSF14	214.631	1533.94	2.19627	0.0304247	1	-3.75521
SWAP70	-306.856	1677.18	-2.19621	0.0304289	1	-3.75532
IGHV3OR16-10	-0.28412	0.2	-2.1962	0.0304295	1	-3.75534
C10orf105	125.4	691.32	2.1961	0.030437	1	-3.75554
RPS27AP5	-2.03602	4.81	-2.19539	0.0304895	1	-3.75695
RNU6-759P	-4.27397	26.88	-2.1953	0.0304961	1	-3.75712
FAAHP1	-16.6093	68.69	-2.19467	0.0305427	1	-3.75837
PINK1-AS	-38.3354	328.83	-2.19381	0.0306063	1	-3.76006
LARGE-AS1	-0.157788	0.07	-2.19335	0.0306405	1	-3.76097
LINCMD1	-0.157788	0.07	-2.19335	0.0306405	1	-3.76097
RNU4-72P	-0.157788	0.07	-2.19335	0.0306405	1	-3.76097
EXD3	-35.1025	291.19	-2.19269	0.0306897	1	-3.76228
RRAD	1.39574	3.13	2.19239	0.0307118	1	-3.76287
MIR4304	-0.778792	1.95	-2.1905	0.0308529	1	-3.7666
KRTAP5-10	-0.462709	0.44	-2.19038	0.0308622	1	-3.76685
RN7SL581P	-0.527651	0.8	-2.1891	0.0309574	1	-3.76936
LRP8	-37.2243	330.53	-2.18868	0.0309888	1	-3.77018
ZNF532	-80.0086	560.89	-2.18855	0.0309991	1	-3.77045
TNNT2	-0.251142	0.15	-2.1882	0.0310249	1	-3.77113
GPR39	-0.98072	2.21	-2.18646	0.0311558	1	-3.77456
PGLYRP1	184.856	564.76	2.18638	0.0311623	1	-3.77473
STX18	-63.5713	626.63	-2.18564	0.0312179	1	-3.77618
SCHIP1	1.16489	2.48	2.18547	0.0312308	1	-3.77652
PRKCE	-138.888	1216.13	-2.18531	0.0312428	1	-3.77683
ZSCAN5A	-21.0472	195.08	-2.1848	0.031281	1	-3.77783
RPS4XP17	-5.02029	34.15	-2.18475	0.0312846	1	-3.77792
PCDH15	-0.204465	0.11	-2.1843	0.0313192	1	-3.77882
LDB3	2.74784	8.08	2.18371	0.031364	1	-3.77998
MAP3K20-AS1	-0.766616	1.07	-2.18257	0.0314498	1	-3.78221
LINC00881	0.273973	0.2	2.18229	0.0314711	1	-3.78276
PARLP2	2.50736	11.46	2.18214	0.0314826	1	-3.78306
CNGA1	-0.606291	1.15	-2.1821	0.0314857	1	-3.78314
MAFF	23.9746	172.02	2.18202	0.0314919	1	-3.7833
OXCT1-AS1	0.663623	1.04	2.18184	0.0315055	1	-3.78365
SNX18P3	-11.376	44.14	-2.18127	0.0315486	1	-3.78476
BOD1P1	-0.2552	0.11	-2.18125	0.0315506	1	-3.78481
NXPH3	-0.68138	0.91	-2.1809	0.031577	1	-3.78549
PPIP5K1	-19.7007	165.1	-2.18057	0.0316024	1	-3.78615
GLT1D1	801.319	5316	2.18034	0.0316196	1	-3.78659
CABYR	-4.38661	20.02	-2.18011	0.0316377	1	-3.78706
NEDD8P1	-1.96195	7.79	-2.17992	0.0316519	1	-3.78742
PRSS12	0.523085	0.53	2.17982	0.0316593	1	-3.78761
XKR3	9.40893	19.35	2.17965	0.0316729	1	-3.78796
IGLV7-46	-21.5302	41.32	-2.17954	0.0316809	1	-3.78817
ATP1B1	-22.4059	108.94	-2.17946	0.0316867	1	-3.78831
SOBP	-8.5307	24.18	-2.17939	0.0316926	1	-3.78847
PRDM15	-74.9097	680.39	-2.17921	0.0317059	1	-3.78881
P2RX2	-0.416032	0.4	-2.17909	0.031715	1	-3.78904
CCL2	-3.3587	6.4	-2.17892	0.0317286	1	-3.78939
BEST2	1.24759	3.17	2.17802	0.031797	1	-3.79114
GAP43	-0.334855	0.2	-2.17762	0.0318278	1	-3.79193
HCN3	-1.76154	4.64	-2.17711	0.0318673	1	-3.79294
CLSTN2	-0.679858	0.8	-2.17689	0.0318841	1	-3.79337
DUSP13B	4.8204	12.63	2.17629	0.0319301	1	-3.79454
ERG	16.4541	33.53	2.17604	0.0319497	1	-3.79504
CDC42-IT1	-28.9036	236.53	-2.17549	0.0319916	1	-3.79611
GPR61	1.47539	4.04	2.17525	0.0320099	1	-3.79657
TRNAU1AP	-42.2912	461.72	-2.17517	0.0320164	1	-3.79674
CCDC127	-58.7326	469.94	-2.17507	0.0320243	1	-3.79694
ADGRB1	-10.8016	67.3	-2.17472	0.0320508	1	-3.79761
CD300E	-388.203	2022.76	-2.17472	0.0320513	1	-3.79763
GBP6	14.4957	47.73	2.1746	0.0320605	1	-3.79786
AVP	0.623034	0.64	2.17172	0.0322834	1	-3.80349
DDX19A	-70.4485	727.98	-2.17108	0.0323329	1	-3.80474
CUEDC1	100.38	763.87	2.16968	0.0324419	1	-3.80747
MIR191	1.54693	8.87	2.16783	0.0325865	1	-3.81109
AFF3	-421.584	1964.54	-2.16729	0.032629	1	-3.81215
TTC7A	-339.703	3197.98	-2.16702	0.0326503	1	-3.81268
NBR2	-21.899	267.31	-2.16693	0.0326571	1	-3.81285
MTCO1P19	-1.91121	6.79	-2.16689	0.0326607	1	-3.81294
KRT15	-0.321157	0.21	-2.16641	0.0326984	1	-3.81388
PRR22	-5.24455	35.69	-2.16589	0.0327395	1	-3.8149
MIR3177	-1.86707	10.6	-2.16577	0.0327485	1	-3.81512
ZNF587B	-72.9396	815.68	-2.16546	0.0327732	1	-3.81573
MALL	0.342466	0.25	2.16538	0.0327795	1	-3.81589
RPL21P98	-1.04972	1.53	-2.16522	0.032792	1	-3.8162
FAM86FP	-4.33891	29.24	-2.16491	0.032816	1	-3.81679
SPTBN5	-29.3709	106.3	-2.16462	0.0328391	1	-3.81737
SPATS2	-31.0157	202.84	-2.16428	0.0328663	1	-3.81804
NTAQ1	-14.3075	131	-2.16418	0.0328742	1	-3.81823
RPL36AP43	-1.50786	4.64	-2.16407	0.0328824	1	-3.81844
NFAM1	2114.68	15924.7	2.16331	0.0329428	1	-3.81993
CDCP1	-12.6443	41.14	-2.16244	0.0330111	1	-3.82161
HNRNPA1P52	0.596651	0.88	2.16163	0.0330753	1	-3.82319
MTCH1P1	-2.28716	7.96	-2.16132	0.0330998	1	-3.82379
APMAP	880.597	4962.91	2.16108	0.033119	1	-3.82426
PLEKHH3	-3.70523	15.11	-2.16104	0.0331225	1	-3.82435
SLC36A1	340.045	2617.27	2.16079	0.0331425	1	-3.82484
MIR4435-2	1.44647	5.13	2.16052	0.0331637	1	-3.82536
UST-AS2	-0.365297	0.4	-2.16034	0.0331781	1	-3.82571
RN7SL354P	0.486048	0.54	2.15863	0.0333144	1	-3.82904
PCMTD1-DT	-14.2851	96.72	-2.15702	0.033443	1	-3.83217
TRMT2B	-110.064	1224.69	-2.15638	0.0334946	1	-3.83342
UNC93B6	-1.48402	2.25	-2.15625	0.0335049	1	-3.83367
ZSCAN21	-15.138	135.69	-2.15624	0.033506	1	-3.83369
IGHG4	-55.4292	55.87	-2.1557	0.0335491	1	-3.83474
SNRPEP2	-1.15119	2.53	-2.15473	0.033627	1	-3.83662
PRR36	-2.83105	7.6	-2.15446	0.0336486	1	-3.83714
NFS1	-38.5383	463.83	-2.1544	0.0336532	1	-3.83725
CXCR1	3526.45	20499.1	2.15432	0.0336597	1	-3.83741
LINC01298	-0.214105	0.14	-2.15369	0.033711	1	-3.83865
CREB5	2579.86	13156.9	2.15315	0.033754	1	-3.83968
GRM4	-1.2344	2.21	-2.15309	0.0337593	1	-3.83981
YWHAQP7	-0.510908	0.59	-2.15308	0.0337604	1	-3.83983
RABGEF1P1	-88.1537	932.87	-2.15305	0.0337621	1	-3.83988
REPS2	690.47	3899.71	2.15296	0.0337694	1	-3.84005
TREM1	1194.16	6759.74	2.15284	0.0337791	1	-3.84029
CDON	-13.4211	74.61	-2.15246	0.0338098	1	-3.84102
NEK3	-22.5723	164.3	-2.15217	0.0338334	1	-3.84159
VEZF1P1	-0.763064	1.48	-2.15204	0.0338444	1	-3.84185
TSPEAR-AS1	0.721461	0.86	2.15142	0.033894	1	-3.84304
LETM1	-112.799	1114.62	-2.1507	0.0339529	1	-3.84445
ANKRD45	-0.539827	0.68	-2.15063	0.0339581	1	-3.84457
PLAAT5	-12.5713	31.86	-2.15059	0.0339613	1	-3.84465
C17orf67	-21.5657	185.22	-2.15039	0.0339779	1	-3.84505
ENPP7P4	-0.768138	1.18	-2.1503	0.033985	1	-3.84522
LINC01301	-1.14358	2.98	-2.14946	0.0340536	1	-3.84685
ZNF503-AS2	-4.15322	16.82	-2.14941	0.0340577	1	-3.84695
FBXO36-IT1	-1.26027	4.08	-2.14899	0.0340914	1	-3.84775
SMAD3	-370.942	3529.62	-2.14893	0.0340964	1	-3.84787
PIGZ	-6.60122	45.07	-2.14842	0.0341382	1	-3.84886
SDHCP3	-2.44698	11.51	-2.14814	0.034161	1	-3.8494
MIR3138	2.65195	19.01	2.14786	0.0341837	1	-3.84995
CCDC136	-22.9143	174.68	-2.14772	0.0341951	1	-3.85022
MTG1	-42.622	373.96	-2.14716	0.0342408	1	-3.8513
CYYR1	6.69914	20.52	2.14715	0.0342422	1	-3.85133
MIR1284	-3.2618	19.73	-2.14698	0.0342555	1	-3.85165
CTSE	14.1142	27.97	2.1468	0.0342707	1	-3.85201
LONP1	-85.9011	851.07	-2.14658	0.0342884	1	-3.85243
IGKV3D-15	-2.70117	3.88	-2.14654	0.0342921	1	-3.85251
TST	61.2019	451.27	2.14642	0.0343015	1	-3.85274
MIR30D	-0.670218	1.77	-2.14621	0.0343186	1	-3.85314
RPSAP8	0.454592	0.48	2.14616	0.0343229	1	-3.85324
PANX2	232.297	1080.91	2.14603	0.0343332	1	-3.85348
GFOD2	136.247	1047.46	2.14593	0.0343415	1	-3.85368
GNE	-58.8584	567.7	-2.14548	0.0343789	1	-3.85456
MEGF11	0.73313	1.35	2.14536	0.0343886	1	-3.85479
SIGLEC9	476.751	3263.51	2.14526	0.0343966	1	-3.85498
DHX38	-144.108	1765.32	-2.14523	0.0343991	1	-3.85504
LARS2	-64.0685	668.23	-2.14451	0.0344582	1	-3.85643
TEAD2	-9.62608	24.01	-2.14407	0.0344943	1	-3.85728
RN7SL449P	-3.72451	19.17	-2.14395	0.0345047	1	-3.85753
NINJ2	201.623	765.37	2.14377	0.0345191	1	-3.85786
RNU6-1279P	-1.70827	6.79	-2.1426	0.034616	1	-3.86014
IGF2BP1	-0.223744	0.17	-2.14221	0.0346476	1	-3.86088
MIR1302-3	-0.607813	1.26	-2.14184	0.0346783	1	-3.86159
DYNC1I2P1	-1.81887	6.45	-2.14114	0.0347361	1	-3.86294
OR52N5	0.46829	0.49	2.14077	0.0347673	1	-3.86367
SPAG4	1.48199	4.23	2.14041	0.0347965	1	-3.86435
LINC02014	-1.1933	3.24	-2.14001	0.0348304	1	-3.86514
OGFOD3	-52.1593	502.22	-2.13962	0.0348622	1	-3.86588
RABEP2	-62.6372	588.46	-2.13951	0.0348713	1	-3.86609
MIR1294	-2.35566	10.91	-2.13901	0.0349128	1	-3.86706
RPL3P1	0.509386	0.52	2.13882	0.0349286	1	-3.86742
IGKV1-12	-54.0918	67.55	-2.13881	0.03493	1	-3.86745
TARS2	-41.8569	437	-2.13859	0.0349476	1	-3.86786
LINC01415	-1.42466	2.96	-2.1381	0.0349887	1	-3.86882
BEST1	450.199	2975.46	2.13749	0.0350399	1	-3.87
DNAJC9-AS1	-1.76459	6.86	-2.13684	0.035094	1	-3.87125
ADAMTS15	0.410959	0.3	2.1362	0.0351474	1	-3.87248
NDRG2	-26.967	226.24	-2.13576	0.0351842	1	-3.87333
C19orf47	-30.7793	363.42	-2.13574	0.0351861	1	-3.87337
BCAT2	-33.8559	288.1	-2.13542	0.0352123	1	-3.87398
TUBA4A	453.568	3887.66	2.13476	0.0352682	1	-3.87526
AHCYP2	1.02435	1.97	2.13401	0.0353313	1	-3.87671
FRMD5	0.628108	0.94	2.13342	0.0353803	1	-3.87783
MTCL2	-146.95	933.06	-2.13268	0.0354425	1	-3.87925
ARL14EPP1	-0.270421	0.21	-2.13218	0.0354851	1	-3.88023
PELP1	-95.3648	929.68	-2.13189	0.0355095	1	-3.88078
EHD4	-98.5378	923.66	-2.13152	0.0355411	1	-3.8815
ARHGEF19	-16.2177	133.05	-2.13109	0.0355771	1	-3.88232
COL13A1	-32.5317	50.4	-2.13108	0.0355777	1	-3.88234
DNAJB7	0.219178	0.16	2.13051	0.0356262	1	-3.88344
RN7SL55P	0.219178	0.16	2.13051	0.0356262	1	-3.88344
HBZ	18.7473	23.13	2.12984	0.0356824	1	-3.88472
REP15	-0.783359	1.28	-2.12951	0.0357108	1	-3.88536
PEG10	-26.5794	96.56	-2.1294	0.0357205	1	-3.88558
HESX1	-1.87468	5.15	-2.12909	0.0357465	1	-3.88617
HMGA2-AS1	7.09488	36.92	2.12882	0.0357695	1	-3.88669
AP5B1	609.143	4316.23	2.12827	0.035816	1	-3.88774
CTCF-DT	-11.3262	74.88	-2.12748	0.0358836	1	-3.88927
RPL21P15	0.435312	0.54	2.12713	0.0359131	1	-3.88993
ESRRG	-0.420091	0.36	-2.12672	0.0359484	1	-3.89073
PLPPR3	1.52816	2.56	2.12599	0.0360104	1	-3.89212
RPL30P7	5.46778	27.51	2.12519	0.0360786	1	-3.89365
MPHOSPH6	-34.5723	235.54	-2.12491	0.0361024	1	-3.89419
NPIPB10P	-0.834094	1.28	-2.12474	0.0361176	1	-3.89453
KRT17P2	1.67377	2.37	2.12448	0.0361396	1	-3.89502
ZMYND19	-20.2998	184.07	-2.12383	0.036195	1	-3.89626
FOXP4	-59.2882	493.09	-2.12295	0.0362712	1	-3.89796
SYNE3	-204.926	2408.33	-2.12242	0.0363167	1	-3.89898
PTH1R	0.383562	0.28	2.12219	0.0363362	1	-3.89941
CNGB1	0.342466	0.25	2.12201	0.0363513	1	-3.89975
SPIB	-59.8234	318.44	-2.1216	0.0363872	1	-3.90055
KLK14	-1.6342	5.77	-2.12156	0.0363901	1	-3.90061
ARL2BPP10	-0.231862	0.09	-2.12145	0.0364	1	-3.90083
KRT4	-0.231862	0.09	-2.12145	0.0364	1	-3.90083
RN7SKP50	-3.05987	14.47	-2.12108	0.0364321	1	-3.90154
DDX55P1	-3.51243	10.51	-2.12086	0.0364508	1	-3.90196
ZIM2-AS1	0.693049	1.58	2.12038	0.0364922	1	-3.90287
HILPDA	-8.61796	59.82	-2.11987	0.0365365	1	-3.90386
MTCO3P44	-1.84526	5.69	-2.11923	0.0365916	1	-3.90508
RASA4	-11.1974	47.9	-2.11846	0.0366585	1	-3.90655
PMVK	-27.7367	247.53	-2.11834	0.0366686	1	-3.90678
RNU6-377P	-1.59462	5.91	-2.11772	0.0367229	1	-3.90797
DDX27	-103.994	1115.64	-2.11707	0.0367789	1	-3.9092
HSPBP1	-29.4201	261.19	-2.11705	0.0367809	1	-3.90925
LRRC61	32.1979	294.06	2.11556	0.0369111	1	-3.9121
PTGS2	305.094	1879.83	2.11413	0.0370358	1	-3.91483
EPN2-AS1	-0.49721	0.6	-2.11402	0.0370455	1	-3.91504
TNFAIP2	2446.92	21010.1	2.11254	0.037175	1	-3.91786
AMZ1	-15.9843	58.85	-2.11222	0.0372029	1	-3.91847
LRRC4	556.979	2838.15	2.11171	0.0372479	1	-3.91945
NEBL-AS1	-0.581938	0.39	-2.11139	0.0372758	1	-3.92005
SLC19A1	777.993	5827.12	2.11095	0.0373148	1	-3.92089
KMO	-80.5373	382.43	-2.1109	0.0373191	1	-3.92099
CFAP119	13.1416	116.26	2.11052	0.0373527	1	-3.92172
RN7SKP275	0.553019	0.7	2.11048	0.0373567	1	-3.9218
SLC10A3	7.57534	53.53	2.11021	0.0373804	1	-3.92231
CCT7P1	0.346525	0.29	2.11016	0.037385	1	-3.92241
DLK2	-2.01116	6.68	-2.10966	0.0374289	1	-3.92336
ETS2-AS1	-0.190766	0.12	-2.10895	0.0374914	1	-3.92471
VSIR	3806.9	31932.7	2.10845	0.037536	1	-3.92567
WDFY3-AS2	9.57585	42.62	2.10725	0.0376421	1	-3.92795
C11orf24	-57.0756	464.52	-2.10706	0.0376591	1	-3.92831
ZYG11A	-2.58245	6.3	-2.10473	0.0378661	1	-3.93274
CRIP1P2	-0.771182	1.4	-2.10359	0.0379678	1	-3.93491
LINC00528	51.5571	588.97	2.10281	0.0380378	1	-3.93639
TSSK3	-4.89396	32.02	-2.10262	0.0380552	1	-3.93676
CYP2B7P	-4.23896	9.35	-2.10219	0.0380933	1	-3.93757
LAS1L	-77.8265	766.52	-2.10173	0.0381347	1	-3.93845
SH2D5	1.16337	2.59	2.10149	0.0381563	1	-3.93891
ARHGAP11A	-47.5997	148.03	-2.10104	0.038197	1	-3.93976
IGKV3-7	-21.2111	34.59	-2.10065	0.038232	1	-3.9405
FAM3A	20.6443	200.7	2.09907	0.0383738	1	-3.94349
PPM1M	225.844	2649.94	2.09854	0.0384215	1	-3.94449
THOC6	-30.1476	317.77	-2.09831	0.0384424	1	-3.94493
GNB3	-0.868087	2.07	-2.0977	0.0384981	1	-3.9461
GABRA4	-0.449011	0.45	-2.09713	0.038549	1	-3.94717
PPIAP39	-0.29376	0.23	-2.09679	0.0385803	1	-3.94782
TOX4P1	8.91882	51.77	2.09588	0.0386627	1	-3.94954
SEMA3A	6.26991	16.54	2.0943	0.038807	1	-3.95255
ILDR1	-6.18265	21.82	-2.09398	0.0388361	1	-3.95315
ESPNL	-3.45205	12.48	-2.09384	0.0388489	1	-3.95342
MCF2L2	-44.2938	266.11	-2.09351	0.0388787	1	-3.95403
PDCD11	-141.746	1280.97	-2.09339	0.0388891	1	-3.95425
GRK5-IT1	-6.42872	45.27	-2.09334	0.0388944	1	-3.95436
OR2A9P	2.33486	6.26	2.09313	0.0389132	1	-3.95475
C5AR2	454.168	3214.58	2.09285	0.0389388	1	-3.95528
ITPK1	826.915	7099.87	2.09263	0.0389591	1	-3.9557
LINC00427	-1.47742	6.44	-2.09232	0.0389875	1	-3.95629
MTND4LP11	-0.611872	1.22	-2.0913	0.0390811	1	-3.95822
RNF144B	432.185	3275.31	2.09075	0.0391313	1	-3.95926
NUAK2	614.804	5464.77	2.09055	0.0391496	1	-3.95963
NOMO2	-35.6235	273.18	-2.09032	0.0391702	1	-3.96006
PCDHGB7	7.7859	20.98	2.09022	0.0391799	1	-3.96026
MIR3183	-1.76154	6.64	-2.08992	0.0392078	1	-3.96083
IFT27	-53.9061	629.13	-2.08788	0.0393951	1	-3.96467
ADCY2	-0.501268	0.56	-2.08731	0.0394476	1	-3.96574
CSRNP3	0.328767	0.24	2.08585	0.0395828	1	-3.9685
RPL23AP58	0.328767	0.24	2.08585	0.0395828	1	-3.9685
NINJ1	779.626	5256.09	2.08561	0.0396054	1	-3.96896
CTNNBL1	-84.4744	879.63	-2.08497	0.0396647	1	-3.97017
TAS2R60	-16.4003	80.25	-2.08466	0.0396936	1	-3.97075
NLRP14	-1.31659	2.15	-2.08451	0.0397078	1	-3.97104
ANKMY1	-174.103	1736.09	-2.08313	0.0398361	1	-3.97364
MIR4736	0.795028	2.21	2.08296	0.0398521	1	-3.97396
GPAT4-AS1	-0.913749	2.37	-2.08249	0.0398958	1	-3.97485
CCNJL	511.491	2766.24	2.08235	0.0399089	1	-3.97511
FAM174A-DT	-1.64231	5.69	-2.08098	0.040037	1	-3.97769
DEDD2	360.975	3746.66	2.08012	0.0401172	1	-3.9793
FCRLA	-126.7	548.25	-2.07982	0.0401455	1	-3.97987
XCL2	12.3902	50.23	2.07975	0.0401518	1	-3.98
PHC2-AS1	1.69559	6.46	2.07902	0.0402206	1	-3.98138
RNA5SP465	0.608321	1.37	2.07768	0.0403463	1	-3.98389
FARP2	-49.0959	460.16	-2.07732	0.0403802	1	-3.98456
COSMOC	0.319127	0.27	2.07732	0.0403805	1	-3.98457
ANKRD49P2	-2.59462	7.18	-2.07637	0.0404704	1	-3.98636
CTNS	-38.825	418.88	-2.0758	0.0405235	1	-3.98742
ASPSCR1	-80.8757	815.22	-2.07578	0.0405263	1	-3.98747
LINC01487	0.481989	0.5	2.07569	0.0405346	1	-3.98764
DYNLT4	18.9051	74.06	2.07527	0.0405741	1	-3.98842
INKA2	1288.06	7655.58	2.07392	0.0407022	1	-3.99096
SLC25A47	-0.720446	0.4	-2.07363	0.0407299	1	-3.9915
CEP250	-155.304	1363.85	-2.07334	0.0407575	1	-3.99205
MATN1	-1.35261	5.42	-2.07327	0.0407636	1	-3.99217
H2AC6	848.915	6423.56	2.07159	0.0409235	1	-3.99532
FUT7	170.104	1196.62	2.07121	0.0409601	1	-3.99604
ZNRF3	-8.38153	54.4	-2.0709	0.0409893	1	-3.99661
FAM83A-AS1	0.519026	0.49	2.07061	0.0410171	1	-3.99716
NPAS2-AS1	0.376459	0.46	2.07006	0.0410696	1	-3.99818
SUMO2P19	0.43379	0.65	2.07006	0.0410701	1	-3.99819
GJA4	1.39726	3.02	2.06873	0.0411971	1	-4.00068
TRAJ51	-3.71994	21.84	-2.06862	0.0412076	1	-4.00088
EZR	-530.329	4480.23	-2.06835	0.0412338	1	-4.00139
ICOSLG	-126.945	830.33	-2.06801	0.0412666	1	-4.00203
SCG5	-3.80061	8.67	-2.06702	0.0413617	1	-4.00388
PPP1R13B	-56.0888	523.87	-2.06698	0.0413655	1	-4.00396
ENPP1	-6.41908	21.24	-2.06674	0.0413886	1	-4.00441
RAB11FIP3	-83.1953	769.86	-2.06625	0.0414358	1	-4.00532
MYPN	-0.204465	0.11	-2.06594	0.0414656	1	-4.0059
OR7E22P	-0.204465	0.11	-2.06594	0.0414656	1	-4.0059
ENPP7P6	-0.42618	0.8	-2.06582	0.0414769	1	-4.00612
TNFSF18	1.08219	1.79	2.06574	0.0414855	1	-4.00629
SEMG1	3.72197	10.68	2.06547	0.0415116	1	-4.00679
C5AR1	2225.69	14100.4	2.06532	0.0415254	1	-4.00706
OR51K1P	-0.730086	1.43	-2.06531	0.0415262	1	-4.00707
PAPPA	0.792491	1.06	2.06489	0.0415673	1	-4.00787
LILRA2	203.635	1155.95	2.06484	0.0415725	1	-4.00797
IGHV3-19	-0.276002	0.28	-2.06306	0.0417442	1	-4.01128
ATP6V0D1	564.951	5203.97	2.06215	0.0418331	1	-4.01299
TMUB2	132.277	1656.34	2.06203	0.0418445	1	-4.01321
RPSAP46	-0.604769	1.04	-2.06174	0.0418728	1	-4.01376
POU5F1P6	-4.517	19.11	-2.06153	0.0418931	1	-4.01414
RPS2P44	28.5089	261.33	2.06099	0.0419458	1	-4.01515
ZNF396	27.3836	137.99	2.06093	0.0419514	1	-4.01526
IGHV1-2	-53.6631	55.9	-2.06086	0.0419586	1	-4.0154
CCDC184	-1.30188	3.42	-2.06072	0.0419721	1	-4.01566
WEE2-AS1	1.22374	2.56	2.06047	0.0419963	1	-4.01612
LAMB4	-0.450533	0.56	-2.0599	0.0420515	1	-4.01718
TF	2.19127	8.97	2.05957	0.0420846	1	-4.01781
RN7SL146P	-2.56317	13.24	-2.05915	0.0421252	1	-4.01858
FAM81A	-6.64434	24.52	-2.05902	0.0421384	1	-4.01883
LINC02210	-25.1487	128.16	-2.05892	0.042148	1	-4.01902
ARF1P2	-10.5885	62.9	-2.05887	0.0421526	1	-4.01911
IGHJ3	-1.85946	3.05	-2.05827	0.0422115	1	-4.02023
EIF4BP2	-1.0756	2.4	-2.05762	0.042275	1	-4.02143
MAMDC2-AS1	-0.698123	1.12	-2.05754	0.0422833	1	-4.02159
IGKV1OR22-5	-0.307458	0.22	-2.05621	0.0424136	1	-4.02406
LINC01281	-4.81076	19.34	-2.05608	0.0424264	1	-4.0243
SYN1	2.4414	8.56	2.05585	0.0424489	1	-4.02473
TRIO	-354.662	2623.06	-2.05582	0.042452	1	-4.02479
LMCD1	-2.45662	9.54	-2.05564	0.0424698	1	-4.02513
ARRDC1-AS1	-24.1182	260.69	-2.05427	0.0426046	1	-4.02767
NR2F6	-17.796	108.12	-2.05381	0.0426498	1	-4.02852
OSTCP5	-0.657027	1.15	-2.05356	0.0426744	1	-4.02898
ZG16B	-5.19939	16.76	-2.05335	0.0426955	1	-4.02938
SETP21	-2.2207	7.49	-2.05308	0.0427222	1	-4.02988
FAAP24	11.5373	68.2	2.05293	0.0427374	1	-4.03017
ARHGAP17	-251.904	2691.11	-2.05256	0.0427734	1	-4.03084
PAK5	0.273973	0.2	2.05198	0.0428312	1	-4.03193
CDC16	-213.036	1598.41	-2.05183	0.0428458	1	-4.0322
CRIP3	-11.6413	64.65	-2.05182	0.0428475	1	-4.03223
OXCT2P1	-0.634703	0.87	-2.05151	0.0428781	1	-4.0328
IGHV4-34	-8.9376	27.92	-2.05136	0.0428928	1	-4.03308
ARHGAP27	250.592	2732.08	2.0512	0.0429088	1	-4.03338
SH3TC1	-222.052	1919.05	-2.05098	0.0429302	1	-4.03378
KRTAP5-7	-0.705226	1.3	-2.04996	0.0430316	1	-4.03567
NARF-AS1	-0.214105	0.14	-2.04928	0.0431	1	-4.03695
RPS18P8	-0.214105	0.14	-2.04928	0.0431	1	-4.03695
ALKBH4	-19.9006	202.88	-2.04854	0.0431733	1	-4.03831
MIR4762	-2.1106	11.2	-2.04833	0.0431946	1	-4.03871
IGSF6	636.532	4312.52	2.04793	0.0432344	1	-4.03945
PHOSPHO1	3982.71	16701.5	2.04784	0.043244	1	-4.03962
RN7SL749P	-4.22882	24.95	-2.04761	0.0432664	1	-4.04004
RN7SKP229	-0.260781	0.18	-2.04729	0.0432988	1	-4.04064
NEB	-56.0863	264.02	-2.0472	0.0433075	1	-4.0408
MIR99A	-0.130391	0.09	-2.04696	0.0433318	1	-4.04125
UBE2Q2P12	-0.130391	0.09	-2.04696	0.0433318	1	-4.04125
TMEM39B	-35.482	421.95	-2.04665	0.0433625	1	-4.04182
MIR600HG	-106.186	608.04	-2.0458	0.0434481	1	-4.0434
HAUS5-DT	0.405378	0.37	2.04535	0.0434935	1	-4.04424
FN1	-12.068	15.82	-2.04531	0.0434972	1	-4.04431
STARD6	0.659564	1	2.04513	0.0435149	1	-4.04463
FCER2	-124.548	529.45	-2.04498	0.0435308	1	-4.04492
RNU6-190P	0.178082	0.13	2.04485	0.0435438	1	-4.04517
FAM86JP	-5.41502	24.01	-2.04454	0.0435748	1	-4.04573
TMEM140	699.574	5126.8	2.04384	0.0436452	1	-4.04703
SULT1B1	326.712	1761.87	2.04341	0.0436885	1	-4.04782
LINC02987	-50.1441	491.58	-2.04288	0.0437423	1	-4.04881
DUS2	-54.3029	603.47	-2.04276	0.0437538	1	-4.04902
AKR1B15	-0.13445	0.05	-2.04184	0.0438475	1	-4.05074
GAPDHP46	-0.13445	0.05	-2.04184	0.0438475	1	-4.05074
H3P38	-0.13445	0.05	-2.04184	0.0438475	1	-4.05074
KRT8P27	-0.13445	0.05	-2.04184	0.0438475	1	-4.05074
LINC01104	-0.13445	0.05	-2.04184	0.0438475	1	-4.05074
NPY	-0.13445	0.05	-2.04184	0.0438475	1	-4.05074
OPTC	-0.13445	0.05	-2.04184	0.0438475	1	-4.05074
OR51Q1	-0.13445	0.05	-2.04184	0.0438475	1	-4.05074
RN7SL420P	-0.13445	0.05	-2.04184	0.0438475	1	-4.05074
RPL23AP89	-0.13445	0.05	-2.04184	0.0438475	1	-4.05074
RPL36P2	-0.13445	0.05	-2.04184	0.0438475	1	-4.05074
RPS26P29	-0.13445	0.05	-2.04184	0.0438475	1	-4.05074
SHH	-0.13445	0.05	-2.04184	0.0438475	1	-4.05074
SRGAP3-AS4	-0.13445	0.05	-2.04184	0.0438475	1	-4.05074
MTCL1	-13.5282	60.68	-2.04115	0.043917	1	-4.05201
B4GALT2	-10.3957	49.3	-2.04092	0.04394	1	-4.05243
RPSAP74	-0.706748	0.41	-2.04043	0.0439905	1	-4.05335
LIN52	-24.7626	237.59	-2.04008	0.0440254	1	-4.05398
SHC2	-4.30594	11.19	-2.0391	0.0441251	1	-4.0558
BCL6	3437.45	19782.6	2.0391	0.0441253	1	-4.0558
RPL23AP66	-0.638762	0.83	-2.03895	0.0441403	1	-4.05607
DAO	0.376459	0.46	2.03848	0.0441882	1	-4.05694
EGLN1	1456.97	9688.07	2.03824	0.0442133	1	-4.0574
ACOT11	-30.4505	110.66	-2.03794	0.0442436	1	-4.05794
FIZ1	-24.4455	294.34	-2.03767	0.0442709	1	-4.05844
TUBGCP4	-69.3815	659.87	-2.03757	0.0442811	1	-4.05862
NLRP4	-1.78184	3.44	-2.03686	0.044354	1	-4.05994
ACTMAP	-23.4191	233.83	-2.0358	0.0444621	1	-4.06189
MIR548AC	2.6484	14.6	2.0345	0.0445958	1	-4.0643
LGI4	-1.33486	4.47	-2.03438	0.0446082	1	-4.06452
SNRPCP6	-0.227803	0.13	-2.03408	0.0446389	1	-4.06507
FOLR1P1	0.844242	1.32	2.03378	0.044669	1	-4.06561
MIR4637	-1.60629	6.42	-2.03257	0.0447937	1	-4.06784
SNX18P8	-0.185185	0.05	-2.03247	0.0448045	1	-4.06803
RNU7-19P	-1.16083	5.56	-2.03193	0.0448602	1	-4.06903
YBX2P2	-0.421613	0.47	-2.03157	0.044897	1	-4.06969
RNU6-1088P	-0.611872	1.22	-2.03094	0.0449623	1	-4.07085
BPIFC	-0.431253	0.5	-2.03076	0.0449814	1	-4.07119
THRAP3P1	-0.45865	0.48	-2.03045	0.0450132	1	-4.07176
TNFRSF12A	16.0969	103.01	2.03021	0.0450376	1	-4.07219
RPL14P6	0.932014	2.31	2.0299	0.0450703	1	-4.07277
RANBP1	-43.447	425.58	-2.02968	0.0450926	1	-4.07317
ENPP7P2	-0.266362	0.25	-2.02964	0.0450971	1	-4.07325
RILPL1	32.2314	181.64	2.02912	0.0451507	1	-4.0742
IGLV2-14	-102.858	287.21	-2.02909	0.0451535	1	-4.07425
ZBTB42	-40.9528	336.66	-2.02862	0.0452031	1	-4.07513
ZNF530	-22.7448	203.1	-2.02845	0.0452206	1	-4.07544
EMID1	12.48	36.74	2.02832	0.0452342	1	-4.07568
ANKS3	-33.2445	316.25	-2.0283	0.0452358	1	-4.0757
RPS3AP25	0.383562	0.28	2.02819	0.0452474	1	-4.07591
INPP5B	-135.334	1572.91	-2.02798	0.045269	1	-4.07629
MTFMT	40.7757	447.47	2.02771	0.0452968	1	-4.07678
RGL2	135.32	1340.45	2.02751	0.0453177	1	-4.07715
LINC02223	-1.15221	2.27	-2.02734	0.0453357	1	-4.07747
RN7SL652P	-2.14358	5.25	-2.02683	0.0453885	1	-4.0784
LINC00996	-9.62456	53.9	-2.02679	0.0453929	1	-4.07848
STX10	135.609	1462.18	2.02615	0.0454596	1	-4.07965
ACTN1	1931.65	15440.9	2.02593	0.0454831	1	-4.08007
CEACAM4	87.7996	473.39	2.02588	0.0454882	1	-4.08016
COLCA1	-10.4622	27.77	-2.02584	0.0454926	1	-4.08023
P2RX1	262.313	1692.97	2.02531	0.0455472	1	-4.08119
CCDC148	1.78437	5.71	2.02494	0.0455866	1	-4.08189
RPSAP4	-0.667681	0.92	-2.02484	0.045597	1	-4.08207
LRRC25	777.787	6907.97	2.02415	0.0456688	1	-4.08333
SLC25A2	-0.737697	0.98	-2.02412	0.0456718	1	-4.08338
C12orf43	-30.4932	314.74	-2.02353	0.0457341	1	-4.08447
SLC22A15	272.384	1969.47	2.02294	0.0457965	1	-4.08556
NSUN4	-103.196	849.63	-2.02237	0.0458557	1	-4.08659
RNU6-975P	-1.39066	7.17	-2.0221	0.0458846	1	-4.0871
FPR3	-19.0903	62.99	-2.02199	0.045896	1	-4.0873
MLXIPL	-0.362253	0.18	-2.02173	0.0459232	1	-4.08777
ATP5MFP5	-0.181126	0.09	-2.02157	0.0459406	1	-4.08807
NPM1P19	-0.181126	0.09	-2.02157	0.0459406	1	-4.08807
OR2T3	-0.658042	0.89	-2.02129	0.0459695	1	-4.08858
MFSD4B	-106.051	1148.62	-2.01947	0.0461616	1	-4.09191
PILRA	599.105	4415.68	2.01934	0.046176	1	-4.09216
MIPEP	-27.3333	238.38	-2.01907	0.0462036	1	-4.09264
LYRM4-AS1	-4.66109	29.19	-2.01906	0.0462054	1	-4.09267
ELF3	5.54287	30.75	2.01882	0.046231	1	-4.09311
RNU6-177P	-1.85084	8.76	-2.01823	0.0462931	1	-4.09418
RPS29P16	-2.6758	16.38	-2.01817	0.0462999	1	-4.0943
MET	-4.7656	6.41	-2.01781	0.0463374	1	-4.09495
ZNF213-AS1	-39.6641	427.86	-2.01754	0.046366	1	-4.09544
NKAPL	8.81735	32.77	2.01718	0.0464048	1	-4.09611
HAP1	-0.313039	0.29	-2.01671	0.0464544	1	-4.09697
TMEM156	-58.8209	342.32	-2.01511	0.0466243	1	-4.09988
IGKV3-20	-256.082	446.06	-2.01505	0.0466307	1	-4.09999
MAP4K1	-182.23	1725.12	-2.0145	0.0466901	1	-4.10101
MIR1262	5.6687	17.99	2.0138	0.0467644	1	-4.10228
SERPINB9P1	-39.9274	231.89	-2.01376	0.0467695	1	-4.10237
TTC21A	-42.9335	294.14	-2.01351	0.0467961	1	-4.10282
LINC01511	-0.623541	0.73	-2.01176	0.0469831	1	-4.10601
GRAPL	-1.97159	5.82	-2.01173	0.046987	1	-4.10607
RPL21P106	-1.77321	6.15	-2.01164	0.0469962	1	-4.10623
AZIN2	-18.4186	140.11	-2.0113	0.0470328	1	-4.10685
GAPDHP32	-1.81735	5.34	-2.01118	0.0470452	1	-4.10706
DRD3	-1.38458	3.73	-2.01112	0.0470517	1	-4.10717
TCIRG1	853.442	9772.05	2.011	0.0470645	1	-4.10739
RPL29P2	-0.307458	0.22	-2.01031	0.0471396	1	-4.10866
RPSAP39	-0.307458	0.22	-2.01031	0.0471396	1	-4.10866
TXNDC11-AS1	-3.04668	9.85	-2.00994	0.0471794	1	-4.10934
OAZ2	655.845	6691.73	2.00946	0.0472313	1	-4.11022
LRIG1	-130.573	1234.2	-2.00893	0.0472876	1	-4.11117
DIRAS3	0.87519	1.75	2.00867	0.0473165	1	-4.11165
TOE1	-25.7712	270.15	-2.00841	0.0473442	1	-4.11212
POLR3A	-103.88	1149.76	-2.00793	0.0473965	1	-4.113
NBPF1	-155.363	1056.4	-2.00751	0.0474414	1	-4.11376
RNASE4	0.279046	0.5	2.00617	0.0475864	1	-4.11619
ASXL3	-0.828006	0.84	-2.00608	0.0475963	1	-4.11636
SRPK1	658.518	4157.94	2.00541	0.0476695	1	-4.11759
SURF2	-8.07965	58.25	-2.0051	0.0477031	1	-4.11815
RPS27AP6	-0.90208	1.86	-2.00505	0.0477081	1	-4.11823
IL31RA	-9.09691	35.1	-2.00457	0.0477608	1	-4.11911
RBM11P1	-0.755961	1.3	-2.00344	0.0478838	1	-4.12117
LINC02700	-1.39675	3.61	-2.00342	0.0478858	1	-4.1212
KRI1	-106.505	942.14	-2.00334	0.047895	1	-4.12135
CEACAM16	0.29173	0.25	2.00315	0.0479154	1	-4.12169
GBX2	-0.157788	0.07	-2.00263	0.0479728	1	-4.12265
MAGEB17-AS1	-0.157788	0.07	-2.00263	0.0479728	1	-4.12265
NR0B2	-0.157788	0.07	-2.00263	0.0479728	1	-4.12265
SOST	-0.157788	0.07	-2.00263	0.0479728	1	-4.12265
STAG3	-7.4688	45.77	-2.00222	0.0480171	1	-4.12339
SYMPK	-207.118	2747.73	-2.00187	0.0480558	1	-4.12403
GAPDHP62	-2.22222	13.6	-2.00179	0.0480647	1	-4.12417
MGAM	1724.93	8200.05	2.00138	0.0481086	1	-4.1249
RNU6-1316P	-1.49011	7.69	-2.00132	0.0481157	1	-4.12502
PPP1R16B	-272.219	2593.91	-2.00033	0.0482239	1	-4.12681
LRRFIP1P1	-9.23186	48.52	-1.99891	0.0483807	1	-4.1294
GREM2	-7.18975	20.27	-1.99883	0.0483886	1	-4.12953
LANCL2	-26.8508	253.51	-1.99882	0.0483902	1	-4.12956
GSTA7P	-8.16641	7.52	-1.99866	0.0484083	1	-4.12986
PTRH1	-11.7519	102.31	-1.99805	0.0484754	1	-4.13096
FNBP1L	-55.6936	260.64	-1.99795	0.0484865	1	-4.13114
RAD52	-36.8376	365.59	-1.99736	0.0485507	1	-4.1322
IGKV1D-42	-0.538305	0.57	-1.99641	0.0486557	1	-4.13392
MAP6	-1.00507	1.97	-1.9961	0.0486906	1	-4.13449
CXCL17	-0.27448	0.17	-1.99585	0.0487183	1	-4.13495
DCPS	-36.1761	384.11	-1.99568	0.0487374	1	-4.13526
H3P24	0.246575	0.18	1.99566	0.0487391	1	-4.13529
MIR4432	-0.547438	1.23	-1.99514	0.0487973	1	-4.13624
NAGPA	-50.5322	535.63	-1.99407	0.0489153	1	-4.13816
AIFM1	-41.1091	406.62	-1.99368	0.0489585	1	-4.13887
CAMKK1	111.505	697.88	1.99288	0.0490486	1	-4.14033
PARL	-58.657	541.81	-1.99264	0.0490753	1	-4.14077
MEX3A	2.17504	9.81	1.99233	0.0491094	1	-4.14132
HOOK2	-19.4373	238.07	-1.99082	0.0492785	1	-4.14406
STARD5	-17.1771	137.72	-1.9908	0.0492801	1	-4.14408
HNRNPA3P17	-1.95079	5.65	-1.99072	0.0492896	1	-4.14424
ABHD4	136.042	1336.57	1.99064	0.0492981	1	-4.14437
VDR	149.287	1240.35	1.9904	0.0493248	1	-4.14481
MAP7D3	-41.0117	335.58	-1.99008	0.0493609	1	-4.14539
UFD1-AS1	-4.62912	22.88	-1.98994	0.0493764	1	-4.14564
STAC3	-17.8148	139.81	-1.98904	0.0494773	1	-4.14727
SCAMP1-AS1	-21.5906	192.35	-1.98773	0.0496243	1	-4.14963
MAN1B1	-111.16	1493.52	-1.98764	0.0496344	1	-4.14979
SLC25A14P1	2.45611	8.83	1.98762	0.0496368	1	-4.14983
BLVRA	-59.4455	379.79	-1.98729	0.0496736	1	-4.15042
PPIAP89	-0.190766	0.12	-1.98727	0.0496768	1	-4.15047
IFITM3P8	-1.74531	5.8	-1.98714	0.0496912	1	-4.1507
IGKV3D-11	-7.4277	8.8	-1.98677	0.0497324	1	-4.15136
RPL31P49	0.729072	1.31	1.9863	0.0497852	1	-4.15221
MMP11	-8.62151	45.41	-1.98628	0.0497882	1	-4.15225
MPL	30.4389	109.85	1.98592	0.0498289	1	-4.1529
LIN7A	461.126	2319.77	1.98546	0.0498809	1	-4.15373
UBFD1	-120.857	1193.33	-1.98522	0.0499072	1	-4.15415
WNT2B	-3.78336	22.09	-1.98518	0.0499117	1	-4.15423
TPCN1	-186.432	1955.09	-1.98514	0.0499165	1	-4.1543
PIWIL4-AS1	1.50837	1.99	1.98511	0.0499199	1	-4.15436
CCR6	-118.548	769.83	-1.985	0.049932	1	-4.15455
MINK1	-336.589	3668.29	-1.98481	0.0499539	1	-4.1549
EVA1CP5	-0.339422	0.53	-1.9847	0.0499668	1	-4.1551
LINC02908	57.9716	474.06	1.98458	0.0499799	1	-4.15531
NCBP2L	0.421613	0.53	1.98454	0.049984	1	-4.15538
DDX54	-114.606	1219.93	-1.98431	0.0500109	1	-4.15581
HLA-DOB	-7.33891	30.05	-1.98423	0.05002	1	-4.15595
RBM17	-120.089	1411.15	-1.98407	0.0500381	1	-4.15624
RARA-AS1	36.5911	249.23	1.9839	0.0500564	1	-4.15653
AZGP1P1	-0.297818	0.19	-1.98385	0.0500622	1	-4.15662
GDA	-0.76205	0.74	-1.98372	0.0500773	1	-4.15686
PSMC3	-50.0974	507.54	-1.98335	0.0501197	1	-4.15754
CEP164	-89.4313	1213.53	-1.98252	0.0502137	1	-4.15903
CFAP141	-1.65906	8.9	-1.98215	0.0502552	1	-4.15969
ZNF324B	-19.2643	211.9	-1.9815	0.050329	1	-4.16085
DQX1	-1.62709	9.59	-1.98137	0.0503447	1	-4.1611
EBF1	-84.0081	373.6	-1.98129	0.0503531	1	-4.16123
CLEC4M	-0.280061	0.24	-1.98124	0.0503589	1	-4.16132
MTND4P32	-3.31761	15.43	-1.98102	0.0503846	1	-4.16173
PAX5	-459.835	2112.58	-1.98086	0.0504029	1	-4.16202
POLH	-52.9001	629.42	-1.98067	0.0504237	1	-4.16235
STK16	57.2106	520.06	1.98054	0.0504385	1	-4.16258
VPS37D	-0.464231	0.55	-1.97959	0.0505478	1	-4.1643
OR52M2P	-0.330797	0.24	-1.97944	0.0505645	1	-4.16457
VARS1	-68.5906	567.04	-1.97923	0.0505887	1	-4.16495
MRPS11	-33.278	410.67	-1.9782	0.0507059	1	-4.16679
RPS2P29	-5.52511	51.3	-1.97769	0.0507645	1	-4.16771
PPP5C	-107.169	950.47	-1.97754	0.0507825	1	-4.16799
KIF27	151.964	829.86	1.97712	0.0508307	1	-4.16874
SRGAP3	-53.5637	256.38	-1.97647	0.0509048	1	-4.1699
ATP6V0B	446.043	4243.13	1.97644	0.050908	1	-4.16995
ENTPD7	-28.8184	314.37	-1.97641	0.0509115	1	-4.17001
BCAN-AS2	-0.980213	1.84	-1.97612	0.0509455	1	-4.17054
MORN3	-7.26585	37.77	-1.97599	0.0509599	1	-4.17076
IGKV1-37	-0.210046	0.18	-1.97551	0.0510153	1	-4.17163
RNU6-318P	-0.105023	0.09	-1.97505	0.051068	1	-4.17245
NOL9	-174.108	1687.42	-1.975	0.0510744	1	-4.17255
AGAP4	-0.886352	1.39	-1.97437	0.0511469	1	-4.17368
IGHV3-15	-7.81786	18.33	-1.97435	0.0511491	1	-4.17371
FAM177B	-13.6525	59.33	-1.97353	0.0512441	1	-4.17518
NDUFB2-AS1	-4.89802	34.98	-1.97353	0.0512443	1	-4.17519
SNORD111	-1.82648	11	-1.97267	0.0513429	1	-4.17671
RN7SL430P	5.32775	41.63	1.97229	0.0513874	1	-4.1774
TENM4	-31.8534	60.71	-1.97227	0.0513897	1	-4.17744
IFNL1	1.01218	2.85	1.97133	0.0514989	1	-4.17913
FAM53C	673.124	5289.64	1.97128	0.0515047	1	-4.17922
SKINT1L	-0.652968	1.19	-1.96897	0.0517734	1	-4.18335
CELSR1	-58.8199	304.58	-1.9688	0.0517933	1	-4.18366
FANCD2OS	0.150685	0.11	1.96869	0.0518059	1	-4.18385
LINC01435	0.150685	0.11	1.96869	0.0518059	1	-4.18385
MSS51	-18.6438	225.39	-1.96857	0.0518201	1	-4.18407
GGT3P	-0.384576	0.46	-1.96836	0.0518451	1	-4.18445
GNAS-AS1	-3.4967	18.04	-1.96785	0.0519041	1	-4.18535
HYDIN	6.04515	7.45	1.96772	0.0519191	1	-4.18558
RPL7AP34	-0.416032	0.4	-1.9675	0.051945	1	-4.18598
PNPLA7	-40.4805	228.19	-1.96744	0.051952	1	-4.18609
MYO18A	-226.795	2540.44	-1.96722	0.0519782	1	-4.18649
RN7SL200P	-3.59361	27.71	-1.967	0.0520036	1	-4.18687
RASSF3-DT	0.589041	1.43	1.967	0.0520039	1	-4.18688
LONRF2P1	-0.28412	0.2	-1.96685	0.0520213	1	-4.18715
IL5RA	-153.168	439.78	-1.96551	0.0521779	1	-4.18953
SLC17A7	-0.998478	2.16	-1.96548	0.0521812	1	-4.18958
CENPO	-27.7544	300.48	-1.96521	0.0522136	1	-4.19008
RN7SL335P	-0.204465	0.11	-1.96495	0.0522438	1	-4.19053
NLN	-66.0654	404.55	-1.96451	0.0522953	1	-4.19132
HDAC7	463.703	6012.17	1.96433	0.0523168	1	-4.19164
RBM34	-9.52055	105.05	-1.96323	0.0524462	1	-4.19361
DHX34	474.649	4244.79	1.96305	0.0524677	1	-4.19393
NPIPB5	-17.1314	119.42	-1.96274	0.0525048	1	-4.19449
FABP3	0.260274	0.19	1.96267	0.052513	1	-4.19462
TMEM62	-61.4637	613.65	-1.96216	0.0525722	1	-4.19551
ZNF561-AS1	-13.273	115.57	-1.96209	0.0525815	1	-4.19565
NF2	-149.904	1666.57	-1.96201	0.0525904	1	-4.19579
CCDC137	-27.6418	337.34	-1.9618	0.0526155	1	-4.19616
APOBEC3H	-7.93557	36.17	-1.96017	0.0528079	1	-4.19906
DNM1P51	-1.53831	3.84	-1.96013	0.0528131	1	-4.19914
CPLX2	-2.04414	3.73	-1.9596	0.0528756	1	-4.20008
LANCL1-AS1	-0.120751	0.06	-1.95928	0.0529142	1	-4.20066
PINX1-DT	-0.120751	0.06	-1.95928	0.0529142	1	-4.20066
RPL36P16	-0.120751	0.06	-1.95928	0.0529142	1	-4.20066
SNORD113-4	-0.120751	0.06	-1.95928	0.0529142	1	-4.20066
SQLE-DT	-0.120751	0.06	-1.95928	0.0529142	1	-4.20066
WWC2-AS1	-0.120751	0.06	-1.95928	0.0529142	1	-4.20066
YTHDF3P1	-0.120751	0.06	-1.95928	0.0529142	1	-4.20066
LOXL1-AS1	-22.934	186.11	-1.95881	0.05297	1	-4.20149
PSME2P5	-0.214105	0.14	-1.95872	0.0529808	1	-4.20165
HNRNPA1P38	-0.29934	0.3	-1.95859	0.052996	1	-4.20188
ODF2	-79.6626	939.55	-1.95839	0.05302	1	-4.20224
PTK6	-4.78184	25.25	-1.9579	0.0530777	1	-4.2031
RNU6ATAC36P	-0.415018	0.66	-1.95755	0.0531201	1	-4.20374
HRH4	-102.785	335.93	-1.95748	0.0531281	1	-4.20386
MOSPD2	419.131	2679.04	1.95743	0.0531342	1	-4.20395
CHRNA1	-0.218163	0.1	-1.9571	0.0531736	1	-4.20454
RIC3-DT	-0.218163	0.1	-1.9571	0.0531736	1	-4.20454
NDUFA9P1	-0.863014	1.37	-1.95697	0.0531888	1	-4.20476
KRT36	0.935566	1.72	1.95633	0.0532654	1	-4.2059
RN7SKP55	1.13699	2.83	1.95561	0.0533513	1	-4.20718
RPS6P25	-4.95231	37.57	-1.95548	0.0533668	1	-4.20741
SYN3	-9.64079	25.74	-1.95547	0.0533679	1	-4.20743
ACTBP1	0.905124	1.92	1.95478	0.053451	1	-4.20866
SLC49A4	187.115	1652.89	1.95361	0.0535908	1	-4.21073
MAPK11	-8.99848	62.32	-1.95357	0.0535963	1	-4.21082
KIF7	-2.61187	8.76	-1.95357	0.0535964	1	-4.21082
CSTPP1	-23.3105	262.65	-1.95354	0.0535993	1	-4.21086
RPL13P5	-0.620497	1.51	-1.95343	0.0536123	1	-4.21105
TRPV4	-6.19229	22.85	-1.95332	0.0536263	1	-4.21126
ZBTB3	-32.3739	390.33	-1.9532	0.0536399	1	-4.21146
SMARCB1	-75.9193	912.69	-1.95287	0.0536795	1	-4.21205
DCHS1-AS1	-0.501268	0.56	-1.95217	0.0537648	1	-4.2133
BLZF2P	15.1167	111.85	1.95193	0.053793	1	-4.21372
NXPH4	-6.11618	19.35	-1.95188	0.053799	1	-4.21381
SERPINA1	3023.41	25456.5	1.95187	0.0537999	1	-4.21382
MSL1	1637.01	13278.7	1.95125	0.0538748	1	-4.21492
FHAD1	-9.15931	23.61	-1.9509	0.0539175	1	-4.21555
ZSWIM9	-14.0193	111.84	-1.94987	0.054042	1	-4.21738
RPLP0P9	-1.14358	2.98	-1.94982	0.0540474	1	-4.21746
CD81	-255.5	2320.3	-1.94863	0.0541917	1	-4.21957
KIF3B	-106.062	1230.76	-1.94811	0.0542547	1	-4.22049
MIR548E	4.7519	32.58	1.94757	0.054321	1	-4.22146
SLC44A2	1519.52	15526.1	1.94736	0.0543461	1	-4.22183
LINC02367	3.00863	7.9	1.94654	0.0544456	1	-4.22328
CYP4F3	1615.11	6770.51	1.94621	0.0544861	1	-4.22386
ALDH16A1	-91.2907	873.58	-1.94601	0.0545105	1	-4.22422
CLDN9	45.5505	236.4	1.94598	0.054514	1	-4.22427
CNTROB	-38.5738	452.73	-1.94533	0.0545931	1	-4.22542
IFITM3P7	0.390157	0.47	1.94518	0.054611	1	-4.22568
KRBA2	-8.04668	64.2	-1.94516	0.0546143	1	-4.22573
SCGB3A2	-2.62303	4.9	-1.94414	0.0547392	1	-4.22754
ATG101	-24.3932	285.23	-1.94401	0.0547547	1	-4.22776
RPL32P21	-1.13902	2.65	-1.9435	0.0548163	1	-4.22865
HDAC4-AS1	4.78792	33.31	1.94302	0.0548752	1	-4.2295
PBX4	-19.0756	190.26	-1.94255	0.054933	1	-4.23033
APOLD1	19.3709	132.4	1.94253	0.0549359	1	-4.23038
DGLUCY	572.475	6271.24	1.94247	0.0549429	1	-4.23048
XKR6	-40.7032	388.62	-1.94166	0.055043	1	-4.23192
HAO2	-0.256722	0.22	-1.94142	0.0550725	1	-4.23234
RN7SL573P	2.53628	9.37	1.94105	0.0551174	1	-4.23299
EPS8L3	-0.421613	0.47	-1.94064	0.0551683	1	-4.23372
RNA5SP128	-0.521055	0.99	-1.94045	0.0551917	1	-4.23405
ATP6V0A2	-148.874	1735.47	-1.94041	0.0551965	1	-4.23412
TOMM40	-49.0893	537.35	-1.93967	0.0552874	1	-4.23542
ITPRIPL2	-119.723	904.38	-1.93965	0.0552901	1	-4.23546
NNMT	0.849315	2.62	1.93957	0.0552996	1	-4.2356
LINC00910	-66.5921	599.61	-1.93857	0.0554235	1	-4.23737
OAF	-56.4206	426.85	-1.9384	0.055444	1	-4.23766
MMP8	126.993	186.52	1.93749	0.0555565	1	-4.23927
CTBP2P8	48.1466	168.11	1.93731	0.0555792	1	-4.23959
EPB41L2	-64.5449	503.66	-1.93626	0.0557087	1	-4.24143
TCAF1P1	-2.70928	12.8	-1.93585	0.0557607	1	-4.24217
ENPP2	-14.8727	81.18	-1.93581	0.0557649	1	-4.24223
GPR152	0.503805	0.59	1.9357	0.055779	1	-4.24243
RN7SKP86	0.470827	0.64	1.93488	0.0558802	1	-4.24386
LINC01141	-0.229325	0.24	-1.93481	0.055889	1	-4.24399
MIR3679	-3.69914	30.67	-1.93408	0.05598	1	-4.24527
RAB4A-AS1	1.10046	2.47	1.93397	0.0559938	1	-4.24547
CXCR4	1023.39	8827	1.93346	0.0560577	1	-4.24637
NAA40P1	-1.0624	2.78	-1.93317	0.0560942	1	-4.24689
ITPRIP	750.984	6420.7	1.9331	0.0561025	1	-4.247
ACACB	-100.492	930.9	-1.93238	0.0561924	1	-4.24827
RTN2	35.6621	231.7	1.93197	0.0562432	1	-4.24898
OR10D1P	-0.280061	0.24	-1.93195	0.0562466	1	-4.24903
CSF2RBP1	19.4622	120.8	1.93154	0.0562973	1	-4.24974
SNRPA	-69.1974	813.56	-1.9315	0.0563023	1	-4.24981
KLF2-DT	-4.54236	27.61	-1.93148	0.0563047	1	-4.24985
HSPA1B	0.246575	0.18	1.9314	0.0563147	1	-4.24999
RNU6-13P	0.246575	0.18	1.9314	0.0563147	1	-4.24999
PRAF2	15.1999	117.17	1.93087	0.056381	1	-4.25092
P4HA3	-0.460173	0.59	-1.93069	0.0564044	1	-4.25125
COPDA1	-1.51903	2.78	-1.93	0.0564902	1	-4.25245
PLA2G2D	-3.72451	11.17	-1.92941	0.0565641	1	-4.25348
LINC00354	0.662608	0.78	1.92899	0.0566173	1	-4.25422
ABCA6	-10.7788	47.65	-1.92839	0.0566934	1	-4.25529
XIAPP3	0.357179	0.52	1.92827	0.0567078	1	-4.25549
ELOCP3	-0.260781	0.18	-1.92824	0.0567124	1	-4.25555
RPL21P99	-2.7722	5.68	-1.92791	0.0567531	1	-4.25612
ZSCAN22	-24.3907	264.38	-1.92646	0.0569368	1	-4.25867
RN7SL402P	0.445967	0.77	1.92639	0.0569457	1	-4.25879
CD79B	-254.102	1297.95	-1.92625	0.0569629	1	-4.25903
RN7SL487P	-0.273465	0.43	-1.92609	0.0569833	1	-4.25932
SETD4-AS1	-0.273465	0.43	-1.92609	0.0569833	1	-4.25932
TTC9-DT	-5.1101	24.64	-1.92592	0.057005	1	-4.25962
BMX	59.8513	198.21	1.92572	0.0570308	1	-4.25997
RN7SKP165	0.399797	0.44	1.92549	0.0570595	1	-4.26037
ZNF469	-39.4642	306.08	-1.92541	0.05707	1	-4.26052
HMSD	0.559614	0.89	1.92529	0.0570848	1	-4.26072
MIRLET7BHG	66.6276	748.49	1.92476	0.0571516	1	-4.26165
SLPI	75.6748	214.65	1.92472	0.057157	1	-4.26172
OVCH1	-2.0624	4.05	-1.92417	0.0572267	1	-4.26268
RNU7-57P	-1.79756	8.91	-1.92399	0.0572497	1	-4.263
MIR3922	-1.07661	4.14	-1.92274	0.0574088	1	-4.26519
LTB4R	340.763	2307.72	1.9219	0.0575152	1	-4.26665
NRSN2	-4.03501	23.61	-1.92186	0.0575211	1	-4.26673
PTPN13	-53.6347	333.18	-1.92153	0.0575621	1	-4.2673
RAB24	52.4891	607.28	1.92144	0.0575742	1	-4.26746
RPS29P19	-1.25774	5.23	-1.9206	0.0576811	1	-4.26893
SUMO2P8	0.191781	0.14	1.92019	0.0577332	1	-4.26964
TTLL1	-13.5611	112.73	-1.91998	0.0577612	1	-4.27002
RPS27AP11	-0.784881	1.39	-1.91996	0.0577637	1	-4.27006
HHAT	-22.2385	197.84	-1.91984	0.0577788	1	-4.27026
SETP14	-1.64181	6.32	-1.91964	0.0578045	1	-4.27061
OR1J2	1.76408	2.51	1.91955	0.0578163	1	-4.27078
ITM2B	5746.48	45945.8	1.91915	0.0578669	1	-4.27147
COL6A1	-15.8914	74.14	-1.91901	0.0578855	1	-4.27172
RRN3P3	-33.0005	381.28	-1.91876	0.0579174	1	-4.27215
CCIN	1.79756	7.09	1.91832	0.057973	1	-4.27291
IGLV5-52	-1.56621	5.19	-1.91825	0.0579821	1	-4.27304
EEF1DP3	-34.172	244.61	-1.91791	0.0580256	1	-4.27363
ZNF658B	-0.604769	1.04	-1.91756	0.0580711	1	-4.27425
PTPN23-DT	-8.64891	65.39	-1.91748	0.0580808	1	-4.27438
CYP4F35P	-7.24911	38.56	-1.91709	0.0581313	1	-4.27507
IGLVI-20	-0.29934	0.3	-1.91668	0.0581844	1	-4.27578
PARP1	-339.091	2923.76	-1.91646	0.0582128	1	-4.27617
VPREB3	-30.553	137.4	-1.91629	0.0582347	1	-4.27647
MARK2P13	-0.288179	0.16	-1.9161	0.0582587	1	-4.27679
OPRK1	-0.288179	0.16	-1.9161	0.0582587	1	-4.27679
MATR3P3	-0.144089	0.08	-1.91588	0.0582873	1	-4.27718
NOBOX	-0.144089	0.08	-1.91588	0.0582873	1	-4.27718
RN7SKP197	-0.144089	0.08	-1.91588	0.0582873	1	-4.27718
RN7SL654P	-0.144089	0.08	-1.91588	0.0582873	1	-4.27718
ZNF19	-12.7945	110.66	-1.91571	0.0583097	1	-4.27748
IGHV7-81	-1.49721	0.87	-1.91555	0.0583304	1	-4.27776
SIL1	-29.6134	347.16	-1.91518	0.058377	1	-4.27839
TBXAS1	761.493	7620.26	1.91473	0.0584355	1	-4.27918
MRPS17	-9.36175	77.24	-1.91473	0.0584357	1	-4.27918
RNF166	543.557	5495.5	1.91449	0.0584662	1	-4.2796
RN7SL743P	-3.20802	23.51	-1.91407	0.0585212	1	-4.28034
SHOC1	1.03551	2.83	1.91381	0.0585543	1	-4.28078
MTATP6P19	-1.77981	6.96	-1.91355	0.0585888	1	-4.28125
RNF216P1	-78.3404	861.33	-1.91353	0.058591	1	-4.28128
PAAF1	-28.5743	295.4	-1.91328	0.058623	1	-4.28171
NCF1B	110.032	762.62	1.91324	0.0586289	1	-4.28179
RN7SL558P	-5.36428	38.01	-1.91302	0.0586573	1	-4.28217
TWSG1-DT	2.37139	8.62	1.91211	0.0587748	1	-4.28375
ZFHX3-AS1	-2.6068	13.06	-1.91205	0.0587822	1	-4.28385
DUSP1	1488.52	9171.14	1.91176	0.0588209	1	-4.28437
ITGA9	18.003	69.92	1.91167	0.0588325	1	-4.28452
SDR9C7	-0.426687	0.17	-1.91124	0.0588877	1	-4.28526
CYB561A3	-195.702	2164.73	-1.91121	0.058892	1	-4.28532
HORMAD1	34.76	200.56	1.91106	0.0589115	1	-4.28558
ATP1A1-AS1	-11.2719	106.29	-1.91099	0.0589205	1	-4.2857
B9D2	28.0076	265.89	1.9106	0.0589708	1	-4.28637
NDUFA7	-5.72248	52.23	-1.9101	0.059036	1	-4.28724
NMT2	-103.696	878.45	-1.90983	0.0590712	1	-4.28771
PRKG1-AS1	-0.469812	0.62	-1.90969	0.0590899	1	-4.28796
RNU6-682P	-0.34348	0.49	-1.90944	0.0591229	1	-4.2884
HNRNPDP1	-0.439371	0.42	-1.90929	0.0591421	1	-4.28866
TRPM2	-168.704	781.92	-1.90923	0.0591499	1	-4.28876
PICK1	-27.9711	340.47	-1.90896	0.0591855	1	-4.28924
TRAJ57	-2.13851	11.55	-1.90888	0.0591953	1	-4.28937
LMTK3	-42.4607	332.3	-1.9088	0.0592059	1	-4.28951
AP4S1	-28.5256	308.88	-1.90876	0.0592109	1	-4.28958
BANF1	-55.8858	603.87	-1.90847	0.0592495	1	-4.29009
MIR4690	-0.652461	1.82	-1.9084	0.0592588	1	-4.29021
LUC7L	-148.035	1731.49	-1.90813	0.0592934	1	-4.29067
LINC02576	-7.15068	49.78	-1.90779	0.059338	1	-4.29127
FAS	309.859	2163.79	1.90757	0.0593675	1	-4.29166
DYNLT5	3.88382	9.65	1.9074	0.0593891	1	-4.29194
DNAH3	-0.177067	0.13	-1.90707	0.0594326	1	-4.29252
FAM90A2P	-0.177067	0.13	-1.90707	0.0594326	1	-4.29252
NAT10	-139.804	1431.98	-1.90676	0.0594734	1	-4.29306
CTNND1	-169.362	1249.81	-1.9066	0.0594945	1	-4.29334
RBM12B-DT	0.471842	0.9	1.90657	0.0594982	1	-4.29339
DGAT2	868.773	5627.76	1.90649	0.0595079	1	-4.29352
MIR3168	0.258752	0.3	1.90623	0.059543	1	-4.29398
CD19	-91.274	451.37	-1.90595	0.059579	1	-4.29446
RPL21P35	-3.50634	12.07	-1.9057	0.0596121	1	-4.2949
TMIGD3	-49.9011	173.35	-1.9055	0.0596384	1	-4.29525
TMEM252-DT	10.1487	30.89	1.90494	0.0597125	1	-4.29622
SGSM1	-26.5175	141.42	-1.90468	0.0597458	1	-4.29666
URAHP	0.480467	0.61	1.90462	0.0597545	1	-4.29678
MIR3187	-0.771689	2.77	-1.90446	0.0597754	1	-4.29705
CSGALNACT1	245.818	1849.04	1.90379	0.0598638	1	-4.29822
TROAP	23.6418	107.74	1.90359	0.0598903	1	-4.29857
RNU6-936P	3.39168	22.55	1.90328	0.0599308	1	-4.2991
MIR365BHG	1.44292	5.72	1.90325	0.0599342	1	-4.29914
MSRB1	1024.93	6983.9	1.90314	0.0599496	1	-4.29935
TSC22D4	561.88	6825.58	1.90305	0.0599617	1	-4.2995
ARFGEF1-DT	5.08828	42.27	1.90289	0.0599828	1	-4.29978
CRIPTOP4	-0.181126	0.09	-1.90287	0.0599849	1	-4.29981
NPM1P9	1.59817	7.5	1.90248	0.0600367	1	-4.30049
ADGRE2	1332.15	8234.1	1.90188	0.060116	1	-4.30153
KCNE3	554.951	3893.04	1.90185	0.0601197	1	-4.30158
CEP164P1	0.232877	0.17	1.90161	0.0601522	1	-4.302
DSTNP1	0.232877	0.17	1.90161	0.0601522	1	-4.302
EPHA8	0.232877	0.17	1.90161	0.0601522	1	-4.302
RPF2P1	0.232877	0.17	1.90161	0.0601522	1	-4.302
VNN2	3384.3	16757	1.90157	0.0601568	1	-4.30206
EIPR1-IT1	-5.26636	36.6	-1.90111	0.0602176	1	-4.30286
SUSD6	924.693	9768.1	1.90107	0.0602235	1	-4.30293
ZNHIT1P1	-1.94876	6.17	-1.90096	0.0602373	1	-4.30311
MTUS2	-3.17402	9.72	-1.90088	0.0602478	1	-4.30325
TBC1D9	-263.238	1833.91	-1.90053	0.0602942	1	-4.30386
DNPEP	-63.0396	758.87	-1.9003	0.0603251	1	-4.30426
KCNA6	-14.7189	83.07	-1.89967	0.0604085	1	-4.30535
IGF2R	6396.2	41409.8	1.89959	0.0604192	1	-4.30549
CYP2G1P	-1.58397	5.14	-1.89957	0.0604227	1	-4.30553
CHD6	-351.45	3481.59	-1.89946	0.0604366	1	-4.30572
MGAT3	-30.0873	156.74	-1.89926	0.0604641	1	-4.30607
SRM	-55.7874	585.09	-1.89877	0.0605287	1	-4.30691
ALKBH6	-13.6697	153.91	-1.89875	0.0605311	1	-4.30695
MEAK7	-36.381	389.59	-1.89874	0.0605322	1	-4.30696
FAM242C	0.927955	2.27	1.89839	0.0605799	1	-4.30758
PHB1P7	-1.40589	5.27	-1.89784	0.0606527	1	-4.30852
PROCA1	-19.6301	175.67	-1.89781	0.060656	1	-4.30857
EGOT	0.496702	0.77	1.89645	0.0608386	1	-4.31093
PIP4P2	288.847	1975.71	1.89592	0.0609094	1	-4.31185
SV2C	-1.15576	2.86	-1.89589	0.060913	1	-4.31189
KCNJ8	-0.716388	1.44	-1.89585	0.0609178	1	-4.31196
DOCK4	375.214	1898.61	1.89551	0.0609639	1	-4.31255
ALDH6A1	-55.449	523.3	-1.89463	0.0610823	1	-4.31408
OLFML3	3.65601	27.78	1.89459	0.0610874	1	-4.31414
C19orf73	-1.81329	8.38	-1.8942	0.06114	1	-4.31482
CTBS	513.455	3893.6	1.89373	0.061202	1	-4.31562
SNORA65	-2.10654	12.24	-1.89358	0.0612231	1	-4.31589
ERVH48-1	-2.31253	4.46	-1.89325	0.0612675	1	-4.31646
HLA-DRA	-356.141	2012.61	-1.89287	0.0613179	1	-4.31711
NDUFS8	-47.0173	568.27	-1.89277	0.0613317	1	-4.31728
AACS	-45.3465	485.86	-1.89273	0.0613375	1	-4.31736
LRRTM2	-1.60781	3.53	-1.89241	0.0613807	1	-4.31791
CPSF4	-36.9934	496.18	-1.89179	0.0614643	1	-4.31898
LINC01483	-2.19685	11.1	-1.89169	0.0614765	1	-4.31914
RPL36AP13	-0.262303	0.29	-1.89165	0.0614822	1	-4.31921
PLA1A	-0.706748	1.41	-1.8916	0.0614895	1	-4.3193
LINC00865	-17.0984	91.37	-1.89114	0.061551	1	-4.32009
RNU2-50P	-0.210046	0.18	-1.89103	0.0615667	1	-4.32029
CCR9	-25.5591	78.49	-1.89066	0.0616166	1	-4.32093
LINC01637	-4.23744	24.24	-1.89007	0.0616964	1	-4.32194
TONSL	-12.4378	115.55	-1.88956	0.061765	1	-4.32282
ANPEP	1940.11	10193.7	1.88882	0.0618645	1	-4.32408
GPAT4	-116.858	1683.36	-1.88807	0.0619663	1	-4.32538
ZNF529-AS1	-9.78691	91.3	-1.88741	0.0620572	1	-4.32653
ABCC10	-122.653	1479.5	-1.887	0.0621126	1	-4.32723
MAP1LC3A	33.7331	191.44	1.88689	0.0621268	1	-4.32741
BPI	127.602	275.89	1.88655	0.0621732	1	-4.328
ST13P15	-5.73465	31.11	-1.8862	0.0622214	1	-4.3286
KLC2-AS2	0.321664	0.42	1.88618	0.0622245	1	-4.32864
POLR3E	-113.846	1283.3	-1.88582	0.0622724	1	-4.32925
SMARCA4	-252.119	2800.99	-1.88558	0.0623054	1	-4.32966
PDCD7	-73.3587	805.3	-1.8854	0.0623296	1	-4.32997
DCAKD	-44.4911	485.04	-1.88513	0.0623674	1	-4.33045
TMEM213	0.715373	1.3	1.88504	0.0623787	1	-4.33059
LDHC	-2.7514	3.51	-1.88461	0.0624385	1	-4.33134
IGKV3-11	-377.335	465.36	-1.88459	0.0624408	1	-4.33137
LINC01147	-0.190766	0.12	-1.88447	0.0624568	1	-4.33157
SCN3B	-0.190766	0.12	-1.88447	0.0624568	1	-4.33157
C1RL	355.114	3505.27	1.88383	0.0625443	1	-4.33267
CNKSR3	-6.92998	20.83	-1.8837	0.0625622	1	-4.33289
DNAAF5	-41.412	509.51	-1.88332	0.0626151	1	-4.33356
RPL7AP75	-2.02435	8.3	-1.88304	0.0626525	1	-4.33403
SPCS2P4	4.35667	24.81	1.88245	0.062734	1	-4.33505
USP36	-192.832	2060.64	-1.88244	0.062735	1	-4.33506
DOC2A	-1.30391	3.9	-1.88213	0.0627775	1	-4.33559
WNT5B	-5.48706	30.55	-1.88183	0.0628184	1	-4.33611
FZD4-DT	0.319127	0.27	1.88165	0.0628434	1	-4.33642
POP1	-24.5256	235.8	-1.88156	0.0628553	1	-4.33657
PTDSS2	-31.3435	372.86	-1.88131	0.0628896	1	-4.33699
C3orf62	203.445	1812.33	1.88131	0.0628904	1	-4.337
NADK	1497.12	13695.7	1.88099	0.0629337	1	-4.33754
UBA52P8	1.44444	5.61	1.88047	0.0630056	1	-4.33844
STX8	-33.4972	346.51	-1.88016	0.0630482	1	-4.33897
RGS3	225.052	2618.14	1.87976	0.0631039	1	-4.33966
NUP93	-89.067	1008.87	-1.87963	0.0631212	1	-4.33988
LINGO3	9.67073	65.43	1.87927	0.063171	1	-4.3405
IGHV3OR16-15	-0.214105	0.14	-1.87919	0.0631822	1	-4.34064
LRRC10B	-0.214105	0.14	-1.87919	0.0631822	1	-4.34064
MEOX2	-0.214105	0.14	-1.87919	0.0631822	1	-4.34064
KCNK1	-1.92085	3.82	-1.87893	0.063218	1	-4.34108
UBALD2	527.093	4350.63	1.87887	0.0632263	1	-4.34119
SNORD114-10	-0.107052	0.07	-1.87881	0.0632345	1	-4.34129
NPM1P41	0.264333	0.23	1.87877	0.0632406	1	-4.34136
ADCK2	-45.6763	463.36	-1.87847	0.0632815	1	-4.34187
NPRL3	2027.68	7253.24	1.87845	0.0632838	1	-4.3419
STEAP4	2203.81	12953.5	1.87843	0.0632865	1	-4.34193
ACAA1	168.167	2592.54	1.87835	0.063298	1	-4.34208
PERP	-17.6398	79.16	-1.87778	0.0633766	1	-4.34305
SARM1	-10.0061	85.14	-1.87765	0.063395	1	-4.34328
MKS1	-18.0086	184.15	-1.87756	0.0634075	1	-4.34343
TRAIP	-4.14612	33.64	-1.87732	0.0634402	1	-4.34384
SLC6A6	2579.57	22606.2	1.8771	0.0634715	1	-4.34422
GMDS-DT	-73.2283	922.21	-1.87681	0.0635106	1	-4.34471
DLGAP3	-8.12481	65.18	-1.87677	0.0635161	1	-4.34478
TFAP2E-AS1	-16.8255	125.31	-1.87664	0.0635351	1	-4.34501
INHBA	8.60325	15.91	1.87615	0.0636031	1	-4.34585
ZNF746	600.965	5702.26	1.87602	0.0636206	1	-4.34606
RN7SL20P	-1.97565	11.78	-1.87584	0.0636462	1	-4.34638
LILRA1	112.861	815.5	1.87529	0.063722	1	-4.34731
LINC02705	-4.73567	23.58	-1.87529	0.0637224	1	-4.34732
EVA1B	29.5074	238.17	1.87501	0.0637615	1	-4.3478
RNF214	-57.3135	723.05	-1.87473	0.0638005	1	-4.34828
EIF4EP3	-0.26484	0.14	-1.87445	0.0638389	1	-4.34875
PLK1	-17.8351	125.61	-1.87445	0.0638391	1	-4.34875
FOXD4L1	-2.22425	9.08	-1.87413	0.0638835	1	-4.3493
PNPLA1	34.3896	163.66	1.87411	0.0638857	1	-4.34933
IGLC4	-1.37544	3.07	-1.87405	0.0638953	1	-4.34944
EN2	0.219178	0.16	1.87382	0.0639261	1	-4.34982
CD22	-348.338	1879.75	-1.87381	0.0639288	1	-4.34986
ORM1	33.5753	83.51	1.87311	0.0640259	1	-4.35105
ADIG	1.21766	6	1.8727	0.0640835	1	-4.35175
IGKV2-28	-0.545916	1.12	-1.87206	0.0641727	1	-4.35284
DAZAP2P1	10.037	44.29	1.87144	0.0642584	1	-4.35389
LINC00511	-4.1725	13.88	-1.87121	0.0642911	1	-4.35429
RTL6	-102.409	951.13	-1.87092	0.0643326	1	-4.35479
MTDHP1	-4.9726	15.37	-1.87056	0.0643818	1	-4.35539
FCGR3A	1357.85	9245.01	1.87047	0.0643944	1	-4.35555
ARMC3	9.77473	34.58	1.87042	0.0644017	1	-4.35563
MROH1	-33.2045	413.02	-1.87042	0.0644018	1	-4.35564
ABCB9	-21.9006	183.42	-1.86975	0.064496	1	-4.35678
BLNK	-40.1821	235.63	-1.86962	0.0645137	1	-4.357
FAM207BP	0.615424	1.19	1.86924	0.0645676	1	-4.35765
ARHGAP9	1301.31	11348	1.86887	0.0646194	1	-4.35828
SNORA31	0.907154	4.44	1.86863	0.0646534	1	-4.35869
CYP2T3P	-2.51598	4.83	-1.86852	0.0646693	1	-4.35889
CCND2-AS1	0.71588	1.93	1.86807	0.0647326	1	-4.35965
CARD19	87.9792	1029.41	1.86807	0.0647327	1	-4.35965
FOSL1P1	-1.70015	7.87	-1.86795	0.0647488	1	-4.35985
ZDHHC12-DT	-4.53222	20.21	-1.86789	0.0647573	1	-4.35995
LINC01678	-5.04008	36.58	-1.86726	0.064846	1	-4.36102
LINC02132	-3.95332	17.04	-1.86717	0.0648591	1	-4.36118
FAM111A-DT	-21.0051	208.37	-1.86703	0.0648787	1	-4.36142
MEGF9	3239.53	20267.7	1.8666	0.0649398	1	-4.36216
SPNS3	-49.3283	205.62	-1.86618	0.0649989	1	-4.36287
PHACTR3	1.57331	5.63	1.86616	0.0650013	1	-4.3629
TMPRSS15	-0.852867	0.97	-1.86598	0.065027	1	-4.36321
HS3ST1	-19.8082	87.54	-1.86583	0.0650486	1	-4.36347
WSCD2	-2.63014	9.08	-1.86565	0.0650739	1	-4.36377
CELF5	-1.76357	6.12	-1.86525	0.0651296	1	-4.36444
SPART-AS1	1.01776	2.78	1.865	0.0651662	1	-4.36488
ABCA13	209.7	365.34	1.86498	0.0651691	1	-4.36492
DNAJC17	-24.8747	303.36	-1.86472	0.0652051	1	-4.36535
UBE2E2	-42.4191	327.96	-1.86446	0.0652416	1	-4.36579
IGLV10-54	-17.657	25.74	-1.8643	0.0652646	1	-4.36607
TFAP2A-AS1	0.737697	1.02	1.86429	0.0652667	1	-4.36609
NOD1	-83.6829	1051.43	-1.86428	0.0652682	1	-4.36611
IGHV4OR15-8	-1.75495	2.83	-1.8636	0.0653638	1	-4.36725
ISOC2	-14.7347	141.54	-1.86267	0.0654956	1	-4.36883
PDE9A	-32.2009	161.16	-1.86234	0.0655428	1	-4.3694
ULK1	511.705	4545.1	1.86204	0.0655861	1	-4.36991
RTN3	1420.03	10643.3	1.86172	0.0656317	1	-4.37046
CAMTA1-DT	-2.58194	12.93	-1.86167	0.065639	1	-4.37054
IL6ST-DT	3.10756	21.75	1.86163	0.0656445	1	-4.37061
AGAP6	-9.36479	62.46	-1.86158	0.0656521	1	-4.3707
ASNS	-46.9442	455.99	-1.8614	0.0656769	1	-4.371
PKMYT1AR	-1.95434	1.24	-1.86136	0.0656825	1	-4.37106
NRP2	-10.4206	62.43	-1.86075	0.0657698	1	-4.3721
PTMAP10	0.268392	0.27	1.8607	0.0657763	1	-4.37218
BCAS4	-37.8382	296.23	-1.86046	0.0658115	1	-4.3726
MIP	-0.350076	0.3	-1.86022	0.0658449	1	-4.373
MST1L	5.00101	15.91	1.86022	0.0658461	1	-4.37301
ATP8B5P	0.336885	0.32	1.86007	0.0658662	1	-4.37325
ZNF652-AS1	-6.52917	54.53	-1.86005	0.0658695	1	-4.37329
UNGP3	-0.871639	1.66	-1.85964	0.0659282	1	-4.37399
CD74	-5859.63	50490.1	-1.85948	0.0659506	1	-4.37425
ARL11	254.178	2263.55	1.85936	0.0659678	1	-4.37446
SPATA17	-1.4759	1.33	-1.85863	0.0660724	1	-4.3757
RN7SL559P	-4.06139	34.85	-1.8582	0.066135	1	-4.37644
OSBPL2	336.555	3555.87	1.85805	0.0661565	1	-4.37669
MAP4	-299.443	2879.74	-1.85736	0.0662548	1	-4.37785
COLEC12	-4.55353	12.75	-1.8564	0.0663924	1	-4.37948
NTHL1	-9.19584	85.25	-1.85639	0.0663937	1	-4.37949
IL17RB	-4.33232	12.43	-1.85631	0.0664064	1	-4.37964
USP6	7.20396	12.37	1.85582	0.0664759	1	-4.38046
ANKRD13D	455.22	5593.57	1.8554	0.0665371	1	-4.38118
PATE2	0.258752	0.3	1.85495	0.0666014	1	-4.38194
RABL2B	-5.96093	53.13	-1.85432	0.0666926	1	-4.38301
CCDC120	-5.7585	44.5	-1.85359	0.0667977	1	-4.38424
TLCD5	-1.80467	5.09	-1.85348	0.0668146	1	-4.38444
SLC25A5P3	-0.307458	0.22	-1.85331	0.0668387	1	-4.38472
SSBP3P2	-0.307458	0.22	-1.85331	0.0668387	1	-4.38472
MKLN1-AS	8.3313	50.23	1.85328	0.0668424	1	-4.38476
INSC	7.66362	24.15	1.85325	0.0668474	1	-4.38482
HLCS	-57.9396	522.63	-1.85324	0.0668491	1	-4.38484
TEDC2	-1.70472	6.2	-1.85322	0.0668523	1	-4.38488
MT1L	-13.0467	22.55	-1.85314	0.0668627	1	-4.385
LCTL	-0.153729	0.11	-1.85313	0.0668642	1	-4.38502
LINC02774	-0.153729	0.11	-1.85313	0.0668642	1	-4.38502
FRAT2	1299.76	9833.64	1.85288	0.0669001	1	-4.38544
ACCS	144.06	665.09	1.85288	0.0669007	1	-4.38544
LINC01800	-12.0071	52.42	-1.85275	0.0669203	1	-4.38567
RPS26P21	-4.448	30.79	-1.85238	0.0669736	1	-4.38629
EXOSC6	-55.9072	586.41	-1.8522	0.0669994	1	-4.3866
L3MBTL1	-42.5398	482.02	-1.85215	0.0670072	1	-4.38669
BET1P1	2.02486	7.33	1.8519	0.0670427	1	-4.3871
ANKRD33BP8	-0.450533	0.56	-1.85174	0.0670663	1	-4.38738
FBXW4	-87.1497	1123.64	-1.85171	0.0670698	1	-4.38742
EMC4	-45.583	530.28	-1.85137	0.06712	1	-4.388
ZNF818P	18.2035	103.77	1.85119	0.0671465	1	-4.38831
ZNF687	200.887	2643.24	1.85105	0.0671655	1	-4.38853
MFSD6L	-14.8772	80.51	-1.85096	0.0671789	1	-4.38869
IQSEC2	-12.4216	67.71	-1.85088	0.0671911	1	-4.38883
PDHB	-80.6738	911.96	-1.85075	0.0672098	1	-4.38905
SLC34A3	0.45307	0.59	1.85006	0.0673098	1	-4.39021
HPSE	224.728	1719.57	1.85005	0.0673108	1	-4.39022
ALYREF	-44.0543	546.47	-1.84987	0.0673379	1	-4.39054
TXNP5	0.327245	0.35	1.84931	0.0674189	1	-4.39147
ATPAF2	-41.3825	558.05	-1.84898	0.067467	1	-4.39203
CLIP1-AS1	0.205479	0.15	1.84886	0.0674853	1	-4.39224
RN7SL606P	-3.01268	11.06	-1.84877	0.0674984	1	-4.3924
CYP51A1P2	-0.332319	0.35	-1.84873	0.0675031	1	-4.39245
PART1	-0.332319	0.35	-1.84873	0.0675031	1	-4.39245
ZKSCAN3	-41.1674	441.17	-1.84866	0.0675143	1	-4.39258
ATP10D	-174.024	1467.37	-1.84789	0.0676257	1	-4.39387
DDRGK1	-37.618	444.65	-1.84775	0.0676466	1	-4.39411
MAPT	-2.85134	11.4	-1.84775	0.0676471	1	-4.39412
PKHD1	-1.04008	1.5	-1.84766	0.0676601	1	-4.39427
KRT23	138.403	707.59	1.84734	0.0677066	1	-4.3948
LINC00595	1.20903	4.29	1.84706	0.0677473	1	-4.39527
LINC00856	1.20903	4.29	1.84706	0.0677473	1	-4.39527
LINC02397	-119.271	522.71	-1.84662	0.0678125	1	-4.39602
TSHR	-4.13191	11.28	-1.84515	0.0680282	1	-4.3985
PDE3A	23.9995	91.89	1.84512	0.0680317	1	-4.39854
RPL12P10	0.43379	0.65	1.84512	0.0680326	1	-4.39855
CXCR2	5991.41	38659.1	1.84492	0.0680611	1	-4.39888
LDOC1	-3.069	6.13	-1.84448	0.0681264	1	-4.39963
PFN1P1	2.4551	8.57	1.8438	0.0682262	1	-4.40077
KCNK6	-50.5611	605.72	-1.84367	0.0682458	1	-4.401
LINC02757	-0.675292	1.47	-1.84329	0.0683011	1	-4.40163
PLXNA2	72.4094	571.97	1.84314	0.0683226	1	-4.40188
ZBTB39	-68.5068	726.99	-1.84296	0.0683497	1	-4.40219
HIGD1AP8	-0.760528	1.63	-1.84264	0.0683962	1	-4.40272
NRBF2P4	-1.15068	1.16	-1.84251	0.068416	1	-4.40294
ICAM3	1769.81	14896.9	1.84214	0.0684705	1	-4.40357
ADSL	-72.0974	849.48	-1.84173	0.0685309	1	-4.40425
ANGPTL6	-3.84729	22.71	-1.8411	0.0686249	1	-4.40532
ZNF57	-8.42719	60.7	-1.84106	0.0686301	1	-4.40538
CEACAM6	9.6758	14.73	1.84075	0.0686765	1	-4.40591
HTR2B	-2.2136	3.31	-1.8407	0.0686835	1	-4.40599
RPL23P2	1.25469	5.99	1.84056	0.0687034	1	-4.40622
NBEAL2	2395.54	22226	1.84047	0.0687167	1	-4.40637
GLRX5P2	-0.29934	0.3	-1.84034	0.0687363	1	-4.40659
UBC	982.744	9926.07	1.84021	0.0687554	1	-4.40681
MTCO3P17	0.250634	0.22	1.84021	0.0687563	1	-4.40682
UBE2V1P6	0.250634	0.22	1.84021	0.0687563	1	-4.40682
PDLIM7	460.976	3590.92	1.84017	0.0687621	1	-4.40688
DTD1	-31.7844	439.39	-1.84014	0.0687665	1	-4.40693
TAB1	-79.0863	1036.23	-1.8398	0.0688169	1	-4.4075
MIR657	2.91426	14.72	1.83951	0.0688599	1	-4.40799
SUN1	-156.478	1758.66	-1.83945	0.0688685	1	-4.40809
HNRNPA1P68	-0.465753	0.66	-1.83941	0.0688748	1	-4.40816
PMS2P1	-14.0781	129.76	-1.83923	0.0689018	1	-4.40847
XCR1	-11.0731	30.25	-1.83913	0.0689157	1	-4.40862
FTSJ3	-67.2253	701.37	-1.83913	0.0689162	1	-4.40863
EHMT1	-221.843	3126.61	-1.83905	0.0689278	1	-4.40876
EMBP1	-4.88432	23.99	-1.83905	0.0689283	1	-4.40877
RRS1	-23.6956	208.48	-1.83902	0.068932	1	-4.40881
COL18A1	500.58	3132.09	1.83894	0.0689447	1	-4.40895
FLCN	212.21	1796.95	1.83881	0.0689627	1	-4.40916
RNASE1	-3.83105	9.87	-1.83864	0.0689885	1	-4.40945
LINC00658	0.671233	1.49	1.83863	0.06899	1	-4.40947
RP9	-14.4196	142.77	-1.83859	0.0689968	1	-4.40954
TPST1	106.189	417.74	1.83834	0.0690331	1	-4.40995
BNIP3P4	-1.52156	2.63	-1.83768	0.0691319	1	-4.41107
GUCY1A1	64.2816	308.37	1.83764	0.0691367	1	-4.41112
VANGL2	-22.5114	11.9	-1.83737	0.0691772	1	-4.41158
ADGRE3	910.102	6386.56	1.83734	0.0691821	1	-4.41164
BFSP2	-0.887367	2.13	-1.83721	0.0692009	1	-4.41185
PPP1R18	98.6981	977.42	1.83716	0.0692094	1	-4.41194
SNX29	-297.842	3204.02	-1.83697	0.0692367	1	-4.41225
IGBP1P4	0.386098	0.43	1.83675	0.0692696	1	-4.41262
NOMO3	27.7306	151.91	1.83663	0.069288	1	-4.41283
BCL11A	-194.278	1377.14	-1.83625	0.0693443	1	-4.41346
POFUT1	-75.9153	876.73	-1.83624	0.0693459	1	-4.41348
RNU6-63P	-0.225266	0.28	-1.83571	0.0694244	1	-4.41436
RNU6-1217P	-0.225266	0.28	-1.83571	0.0694244	1	-4.41436
TRPC6	-15.2029	51.05	-1.83567	0.0694313	1	-4.41444
BLMH	-65.1289	628.53	-1.83527	0.0694907	1	-4.41511
CCND2	-737.208	7270.69	-1.83527	0.0694912	1	-4.41511
KRT18P15	-9.9792	55.53	-1.835	0.0695316	1	-4.41557
CTNNA2	-1.35972	2.6	-1.83482	0.0695584	1	-4.41587
RGS19	429.153	4650.8	1.83476	0.0695676	1	-4.41597
MIR4633	-0.273465	0.43	-1.83441	0.06962	1	-4.41656
TNFRSF14	327.606	5139.93	1.83403	0.0696756	1	-4.41718
WNT10A	-15.3521	106.83	-1.83385	0.0697025	1	-4.41748
LINC00683	11.5784	34.23	1.83379	0.0697116	1	-4.41758
PRTN3	10.5581	20.3	1.83371	0.0697238	1	-4.41772
ZBTB7B	635.915	7090.07	1.8335	0.0697559	1	-4.41808
HDAC5	270.636	3417.49	1.83334	0.0697803	1	-4.41835
PPP1R27	0.612887	1.04	1.83332	0.0697826	1	-4.41838
CLDN11	-1.552	4.83	-1.83284	0.0698545	1	-4.41918
CCNE2	6.63927	36.18	1.83271	0.0698743	1	-4.4194
PIK3R2	-1.45104	7.2	-1.83234	0.0699295	1	-4.42002
GPR156	-0.933536	2.8	-1.8321	0.0699661	1	-4.42042
NSRP1	-55.9244	594.99	-1.83205	0.0699737	1	-4.42051
ANAPC7	-64.4363	930.48	-1.83204	0.0699744	1	-4.42052
KCTD15	-46.3064	367.9	-1.83189	0.0699965	1	-4.42076
LINC00989	46.9762	253.7	1.8314	0.0700704	1	-4.42159
SLC9A8	336.117	3388.18	1.8311	0.0701161	1	-4.42209
CTPS1	-47.1568	551.02	-1.83095	0.0701379	1	-4.42233
MIR553	-2.28666	15.59	-1.83081	0.0701604	1	-4.42258
SUCNR1	7.90309	27.51	1.8304	0.0702213	1	-4.42326
AIFM2	-17.0142	158.95	-1.83027	0.0702406	1	-4.42348
DNM1P31	0.710299	1	1.82908	0.070421	1	-4.42547
DNAJB6P1	10.1111	106.27	1.82903	0.0704284	1	-4.42556
LINC01504	-31.2897	205.64	-1.82886	0.0704539	1	-4.42584
LINC00616	-0.231862	0.09	-1.82869	0.0704797	1	-4.42612
H3P4	0.425672	0.57	1.82863	0.070488	1	-4.42622
GATD3	-115.883	1511.22	-1.82863	0.0704892	1	-4.42623
STOX2	4.17149	8.86	1.82855	0.0705007	1	-4.42636
STK40	904.439	9039.87	1.82821	0.0705515	1	-4.42692
CGREF1	-1.0827	2.58	-1.82817	0.0705583	1	-4.42699
MME	3293.14	14906.9	1.82764	0.0706385	1	-4.42788
CD72	-68.9198	366.17	-1.82761	0.0706424	1	-4.42792
RPL37P13	-0.130391	0.09	-1.82756	0.0706502	1	-4.42801
C1orf74	-5.33688	43.03	-1.82743	0.0706698	1	-4.42822
PIN1P1	0.457128	0.63	1.82735	0.0706818	1	-4.42835
DHRS4L2	-16.3937	148.44	-1.82707	0.0707243	1	-4.42882
RPL36P15	-0.171487	0.06	-1.82692	0.0707479	1	-4.42908
DRC12	9.87265	59.17	1.82665	0.0707884	1	-4.42953
CRISP3	55.4389	102.1	1.82657	0.0708006	1	-4.42966
ACCSL	3.23694	7.4	1.82635	0.0708341	1	-4.43003
KCNRG	-2.05835	11.09	-1.82607	0.0708772	1	-4.4305
CLEC17A	-58.6783	283.35	-1.82578	0.0709207	1	-4.43098
RNF24	1268.54	9014.7	1.82577	0.0709214	1	-4.43099
NPIPA6	1.20903	3.29	1.8252	0.0710092	1	-4.43195
GSDMB	-127.151	1101.18	-1.82501	0.0710384	1	-4.43227
LINC01829	0.374937	0.57	1.82499	0.0710412	1	-4.43231
THBS4	-9.8549	32.88	-1.82447	0.0711196	1	-4.43316
TMEM244	-1.4206	5	-1.82441	0.0711296	1	-4.43327
LINC02679	-0.871131	2.29	-1.82422	0.0711578	1	-4.43358
WDR54	-15.1948	159.13	-1.82408	0.0711794	1	-4.43382
DOK1	84.1735	1167.78	1.82356	0.0712594	1	-4.43469
CD40	-62.5236	381.58	-1.82331	0.0712974	1	-4.43511
DTX1	-53.9351	372.22	-1.82326	0.0713042	1	-4.43518
SLAMF1	-95.2344	952.59	-1.82307	0.0713342	1	-4.43551
PGA3	-0.266362	0.25	-1.82278	0.0713773	1	-4.43598
MICA-AS1	-0.361238	0.44	-1.82267	0.071394	1	-4.43616
RPS10P7	-10.5429	101.6	-1.82196	0.0715027	1	-4.43735
ATP8A1-DT	-1.40842	5.12	-1.82182	0.0715248	1	-4.43759
RPL3P9	-1.63267	0.66	-1.82152	0.0715703	1	-4.43808
B4GALT5	820.365	5398.57	1.82102	0.0716474	1	-4.43892
SP140L	-126.383	1474.37	-1.82066	0.071702	1	-4.43951
RPS26P34	-0.494165	0.38	-1.82016	0.0717786	1	-4.44034
COL23A1	2.35008	10.16	1.81956	0.0718705	1	-4.44134
CCL8	-0.855403	1.82	-1.81887	0.0719769	1	-4.44249
ST6GALNAC1	-21.5743	74.51	-1.81884	0.0719812	1	-4.44254
MTCO3P20	-0.87722	2.73	-1.81872	0.0720009	1	-4.44275
PRPF31	-27.7884	342.27	-1.81858	0.0720216	1	-4.44297
HMGXB3	-106.29	1340.89	-1.81848	0.072037	1	-4.44314
EAF2	-44.5931	254.41	-1.8179	0.0721262	1	-4.4441
HCAR3	268.071	1478.84	1.81786	0.0721329	1	-4.44418
IGHV1-67	-0.276002	0.28	-1.81748	0.0721913	1	-4.4448
EXOSC2	-56.5525	642.05	-1.81743	0.0721993	1	-4.44489
IGSF23	2.07357	4.81	1.81684	0.0722905	1	-4.44587
PYCARD	190.175	1901.42	1.81676	0.0723029	1	-4.44601
ADAMTS2	4.05784	6.74	1.81665	0.0723191	1	-4.44618
OR4D2	-0.167428	0.1	-1.8166	0.0723273	1	-4.44627
[truncated: 36,640 more rows]
