# Supplementary material
Source: Research Square preprint supplement (doi:10.21203/rs.3.rs-8976053/v1)
Supplement: Supplementary file 4 [file 1f50b09c5a215efc96977485.xlsx]

## Sheet: Sheet1
p_val	avg_log2FC	pct.1	pct.2	p_val_adj	cluster	gene
0	2.53758	0.648	0.133	0	EXN	SV2B
0	2.46904	0.619	0.12	0	EXN	SATB2
0	2.22147	0.772	0.278	0	EXN	NRGN
0	1.67595	0.755	0.267	0	EXN	ARPP21
0	2.31967	0.735	0.248	0	EXN	ENC1
0	2.00027	0.788	0.304	0	EXN	LDB2
0	2.21374	0.885	0.41	0	EXN	CHN1
0	1.8648	0.732	0.258	0	EXN	NELL2
0	1.93197	0.724	0.252	0	EXN	CABP1
0	2.27877	0.627	0.159	0	EXN	CADPS2
0	1.86787	0.764	0.302	0	EXN	CAMK2A
0	2.15144	0.658	0.204	0	EXN	FAM19A1
0	2.0313	0.835	0.383	0	EXN	RALYL
0	2.29268	0.606	0.16	0	EXN	SLC17A7
0	1.55401	0.675	0.237	0	EXN	NECAB1
0	1.65363	0.65	0.217	0	EXN	OLFM3
0	1.56298	0.84	0.413	0	EXN	PRKCB
0	2.02703	0.591	0.174	0	EXN	LMO4
0	1.51583	0.775	0.361	0	EXN	FBXW7
0	2.55753	0.537	0.124	0	EXN	AC011288.2
0	1.7316	0.618	0.207	0	EXN	EPHA4
0	1.23044	0.656	0.246	0	EXN	PDE1A
0	1.55829	0.676	0.27	0	EXN	CNKSR2
0	1.63299	0.617	0.215	0	EXN	SNCA
0	1.54059	0.687	0.287	0	EXN	MKL2
0	1.42569	0.628	0.228	0	EXN	FAT3
0	1.73565	0.767	0.368	0	EXN	IQCJ-SCHIP1
0	1.56639	0.766	0.368	0	EXN	BASP1
0	2.5643	0.481	0.087	0	EXN	MLIP
0	1.63961	0.648	0.256	0	EXN	SH3GL2
0	1.23751	0.555	0.166	0	EXN	CA10
0	1.88829	0.543	0.157	0	EXN	MIR137HG
0	1.8667	0.587	0.202	0	EXN	GAP43
0	1.88871	0.656	0.274	0	EXN	ARPP19
0	1.52354	0.627	0.253	0	EXN	HECW1
0	0.95073	0.667	0.294	0	EXN	PTPRK
0	1.31332	0.704	0.332	0	EXN	KHDRBS3
0	1.48185	0.814	0.446	0	EXN	KALRN
0	1.38319	0.657	0.29	0	EXN	NRG1
0	1.21594	0.654	0.287	0	EXN	RGS6
0	2.20938	0.512	0.146	0	EXN	FSTL4
0	1.30499	0.814	0.451	0	EXN	ATP2B1
0	2.43779	0.445	0.083	0	EXN	ANO3
0	0.476684	0.688	0.332	0	EXN	CACNA2D1
0	1.06564	0.683	0.329	0	EXN	CACNA2D3
0	2.50161	0.454	0.1	0	EXN	CBLN2
0	1.38315	0.804	0.452	0	EXN	RYR2
0	1.59528	0.607	0.255	0	EXN	HOMER1
0	1.44229	0.554	0.203	0	EXN	WASF1
0	1.12712	0.726	0.376	0	EXN	LINGO2
0	0.866827	0.734	0.385	0	EXN	CHRM3
0	0.971016	0.623	0.277	0	EXN	PIK3R1
0	1.26378	0.617	0.272	0	EXN	ST6GALNAC5
0	0.926159	0.675	0.331	0	EXN	FOXP1
0	0.922704	0.639	0.297	0	EXN	RAPGEF5
0	1.23511	0.69	0.349	0	EXN	GABRB3
0	1.52305	0.56	0.221	0	EXN	ERICH1-AS1
0	1.51599	0.804	0.465	0	EXN	STXBP5L
0	2.65754	0.41	0.071	0	EXN	LY86-AS1
0	1.50318	0.798	0.46	0	EXN	R3HDM1
0	0.641003	0.781	0.443	0	EXN	GRIN2A
0	1.38802	0.834	0.497	0	EXN	KCNQ5
0	1.57225	0.832	0.497	0	EXN	PHACTR1
0	2.47664	0.411	0.077	0	EXN	KIAA1211L
0	2.63205	0.41	0.076	0	EXN	AC114765.1
0	1.19739	0.673	0.342	0	EXN	EFNA5
0	1.23783	0.507	0.177	0	EXN	LMO3
0	1.54596	0.722	0.393	0	EXN	VSNL1
0	0.781249	0.777	0.449	0	EXN	SLC8A1
0	0.823834	0.636	0.308	0	EXN	NLK
0	1.67316	0.485	0.159	0	EXN	POU6F2
0	1.0891	0.687	0.362	0	EXN	CDH18
0	1.95763	0.477	0.152	0	EXN	CPNE4
0	1.07063	0.815	0.491	0	EXN	DCLK1
0	1.17691	0.602	0.279	0	EXN	PAK1
0	1.51538	0.487	0.165	0	EXN	KCTD1
0	1.73291	0.556	0.235	0	EXN	TMSB10
0	1.34274	0.504	0.183	0	EXN	BMPER
0	1.31656	0.569	0.248	0	EXN	SLC39A10
0	1.23204	0.557	0.237	0	EXN	KCNB2
0	0.909165	0.585	0.266	0	EXN	SORCS1
0	1.91241	0.455	0.137	0	EXN	LINC01250
0	2.56156	0.392	0.074	0	EXN	AC067956.1
0	1.398	0.55	0.234	0	EXN	CLSTN2
0	1.50958	0.562	0.247	0	EXN	OLFM1
0	1.55057	0.519	0.204	0	EXN	NUAK1
0	1.34069	0.561	0.247	0	EXN	FAM153B
0	1.62247	0.468	0.155	0	EXN	STX1A
0	1.80288	0.423	0.11	0	EXN	PTK2B
0	2.6184	0.381	0.068	0	EXN	TESPA1
0	1.61886	0.652	0.34	0	EXN	YWHAH
0	0.630861	0.667	0.356	0	EXN	AK5
0	0.752631	0.577	0.268	0	EXN	SORL1
0	1.03676	0.714	0.405	0	EXN	LRFN5
0	0.841663	0.644	0.336	0	EXN	CHSY3
0	1.07672	0.568	0.26	0	EXN	ITPR1
0	0.979735	0.664	0.357	0	EXN	CAMK1D
0	1.24854	0.855	0.548	0	EXN	PPP3CA
0	0.986313	0.685	0.379	0	EXN	ARHGAP26
0	1.04862	0.774	0.468	0	EXN	KHDRBS2
0	1.17602	0.699	0.393	0	EXN	DGKB
0	1.01051	0.64	0.335	0	EXN	ADAM23
0	1.45225	0.42	0.115	0	EXN	MAST3
0	1.05318	0.569	0.265	0	EXN	DGKZ
0	1.33529	0.526	0.223	0	EXN	KIAA1549L
0	1.18507	0.768	0.465	0	EXN	AGBL4
0	2.57351	0.375	0.073	0	EXN	RP11-191L9.4
0	1.4057	0.903	0.603	0	EXN	SNAP25
0	1.0906	0.622	0.322	0	EXN	KCNH1
0	0.820911	0.579	0.279	0	EXN	CDH10
0	1.0507	0.512	0.213	0	EXN	DCAF6
0	1.07757	0.561	0.262	0	EXN	PPM1L
0	0.927802	0.511	0.212	0	EXN	NELL1
0	1.96839	0.392	0.094	0	EXN	SLC6A7
0	0.913202	0.707	0.41	0	EXN	FLRT2
0	1.69408	0.505	0.209	0	EXN	RGS4
0	2.58129	0.383	0.087	0	EXN	AJ006998.2
0	1.93023	0.391	0.096	0	EXN	NGEF
0	0.922902	0.72	0.426	0	EXN	ASIC2
0	1.42819	0.477	0.183	0	EXN	DGCR5
0	0.965012	0.643	0.35	0	EXN	ZNF385B
0	0.839097	0.645	0.352	0	EXN	CDH12
0	0.870307	0.675	0.382	0	EXN	MSRA
0	0.751566	0.669	0.376	0	EXN	ARHGAP32
0	1.24274	0.503	0.21	0	EXN	PRICKLE1
0	1.37332	0.429	0.136	0	EXN	AQP4-AS1
0	1.37074	0.447	0.155	0	EXN	NDFIP2
0	1.63277	0.417	0.125	0	EXN	RORB
0	1.37369	0.788	0.497	0	EXN	MAP1B
0	1.69511	0.468	0.177	0	EXN	PHYHIP
0	2.07892	0.399	0.109	0	EXN	RP11-115D19.1
0	1.14424	0.581	0.291	0	EXN	YWHAZ
0	0.811075	0.655	0.368	0	EXN	GLS
0	1.04546	0.644	0.359	0	EXN	ATP2B2
0	1.00326	0.527	0.242	0	EXN	VPS13A
0	0.906836	0.69	0.405	0	EXN	DGKI
0	1.11929	0.503	0.219	0	EXN	PPP2R2C
0	2.09123	0.375	0.091	0	EXN	SYT7
0	0.428658	0.551	0.267	0	EXN	MBNL2
0	0.876145	0.514	0.23	0	EXN	CDH8
0	0.720078	0.733	0.449	0	EXN	PCDH7
0	1.11503	0.549	0.267	0	EXN	GUCY1A2
0	0.769222	0.647	0.367	0	EXN	RAPGEF2
0	0.939739	0.96	0.68	0	EXN	SYT1
0	1.42362	0.402	0.123	0	EXN	SYTL2
0	0.990764	0.479	0.2	0	EXN	LINC01122
0	1.04093	0.613	0.334	0	EXN	STXBP1
0	0.859905	0.819	0.54	0	EXN	NKAIN2
0	0.817533	0.685	0.407	0	EXN	ADGRL2
0	0.744266	0.672	0.394	0	EXN	GRIA3
0	0.946138	0.494	0.217	0	EXN	CNTN3
0	0.971144	0.655	0.378	0	EXN	CTD-2537O9.1
0	1.29273	0.885	0.608	0	EXN	CELF2
0	1.17395	0.495	0.218	0	EXN	RBFOX3
0	0.528101	0.677	0.401	0	EXN	CHL1
0	0.725041	0.772	0.496	0	EXN	GRIN1
0	0.686473	0.532	0.256	0	EXN	NEDD4L
0	0.889458	0.754	0.479	0	EXN	ERC2
0	1.49929	0.585	0.31	0	EXN	TUBA1B
0	0.816949	0.68	0.407	0	EXN	SCN2A
0	1.03989	0.64	0.367	0	EXN	UCHL1
0	1.50207	0.41	0.138	0	EXN	KCNH3
0	0.692248	0.558	0.288	0	EXN	ZFPM2
0	0.924259	0.529	0.259	0	EXN	RAP1GAP
0	0.989049	0.52	0.25	0	EXN	CDKL5
0	1.08008	0.654	0.385	0	EXN	KCNH7
0	0.860814	0.62	0.351	0	EXN	FOCAD
0	0.981467	0.494	0.226	0	EXN	CAMK4
0	0.271044	0.635	0.368	0	EXN	PSD3
0	0.8696	0.524	0.257	0	EXN	CCPG1
0	2.36771	0.344	0.077	0	EXN	LINC01378
0	1.7193	0.407	0.14	0	EXN	PDP1
0	0.307435	0.55	0.284	0	EXN	EPB41L2
0	1.03458	0.471	0.205	0	EXN	PCSK2
0	0.63661	0.768	0.503	0	EXN	NRCAM
0	0.912793	0.484	0.219	0	EXN	NIN
0	1.47994	0.411	0.146	0	EXN	CA11
0	0.93342	0.718	0.453	0	EXN	HS6ST3
0	0.698937	0.765	0.501	0	EXN	FRMPD4
0	0.618705	0.71	0.446	0	EXN	GRM7
0	0.73882	0.591	0.327	0	EXN	PI4KA
0	0.970967	0.842	0.579	0	EXN	NEGR1
0	1.7327	0.368	0.105	0	EXN	BAIAP2
0	0.988948	0.585	0.323	0	EXN	SORBS2
0	0.597861	0.532	0.271	0	EXN	MED12L
0	1.61105	0.368	0.107	0	EXN	RIT2
0	1.27884	0.415	0.155	0	EXN	ADGRB2
0	0.819756	0.534	0.274	0	EXN	RP1-34H18.1
0	1.14047	0.496	0.237	0	EXN	SLC35F3
0	1.66818	0.409	0.15	0	EXN	CREG2
0	0.762307	0.814	0.555	0	EXN	ATRNL1
0	0.807174	0.537	0.279	0	EXN	ROCK2
0	0.671955	0.771	0.513	0	EXN	KCNMA1
0	0.918406	0.419	0.161	0	EXN	PPFIBP1
0	0.843964	0.617	0.359	0	EXN	NPTN
0	0.762604	0.611	0.355	0	EXN	AFF3
0	1.64365	0.375	0.119	0	EXN	LINC01106
0	0.638952	0.641	0.385	0	EXN	CDK14
0	0.768307	0.599	0.343	0	EXN	SCN8A
0	0.779537	0.666	0.411	0	EXN	DNM1
0	0.961821	0.455	0.2	0	EXN	CACNA1E
0	0.903577	0.504	0.249	0	EXN	BCL11A
0	2.60853	0.301	0.046	0	EXN	PART1
0	2.08252	0.357	0.102	0	EXN	DIRAS2
0	0.431211	0.718	0.463	0	EXN	PEX5L
0	1.38467	0.385	0.131	0	EXN	KCNK1
0	1.01731	0.484	0.23	0	EXN	SYBU
0	0.447123	0.633	0.379	0	EXN	TMEM132D
0	0.644998	0.678	0.425	0	EXN	PAK3
0	1.34044	0.41	0.157	0	EXN	ZBTB18
0	1.02178	0.396	0.143	0	EXN	KLHL2
0	0.251802	0.457	0.204	0	EXN	LRRC16A
0	1.15006	0.397	0.144	0	EXN	GRM1
0	1.08308	0.517	0.264	0	EXN	ZNF804B
0	1.60784	0.362	0.109	0	EXN	ACTN1
0	1.16596	0.785	0.532	0	EXN	CALM1
0	0.929618	0.547	0.295	0	EXN	CHD5
0	0.826077	0.562	0.31	0	EXN	FMN1
0	0.887675	0.514	0.262	0	EXN	KIFC2
0	0.638775	0.637	0.385	0	EXN	PKD1
0	0.662165	0.663	0.412	0	EXN	STRBP
0	0.870924	0.501	0.25	0	EXN	SEPT11
0	0.383277	0.854	0.603	0	EXN	MEF2C
0	1.57694	0.369	0.118	0	EXN	GDA
0	0.67104	0.585	0.334	0	EXN	ABI2
0	0.750069	0.536	0.286	0	EXN	TMEM232
0	0.375789	0.488	0.238	0	EXN	BRINP3
0	0.845441	0.804	0.554	0	EXN	RTN1
0	1.10953	0.425	0.176	0	EXN	PVRL3
0	1.1089	0.416	0.167	0	EXN	PRKAG2
0	1.14135	0.59	0.341	0	EXN	STMN1
0	1.52423	0.4	0.152	0	EXN	SCN3B
0	0.884856	0.403	0.155	0	EXN	ZNF365
0	0.594524	0.629	0.381	0	EXN	WBSCR17
0	0.634178	0.502	0.254	0	EXN	BRINP1
0	1.1853	0.426	0.178	0	EXN	PDE2A
0	1.19807	0.426	0.178	0	EXN	CACNG3
0	0.928724	0.501	0.253	0	EXN	MYH10
0	0.532717	0.538	0.291	0	EXN	PPP1R12A
0	0.883691	0.62	0.373	0	EXN	CAMK2N1
0	1.00381	0.436	0.189	0	EXN	ARHGEF3
0	0.874577	0.489	0.242	0	EXN	FZD3
0	1.19916	0.621	0.374	0	EXN	CALM3
0	1.98566	0.332	0.086	0	EXN	SLIT3
0	0.573392	0.406	0.16	0	EXN	MGST1
0	0.67133	0.619	0.373	0	EXN	CACNA1B
0	0.838876	0.604	0.358	0	EXN	TMEM59L
0	2.10252	0.345	0.1	0	EXN	RP11-30J20.1
0	0.443011	0.564	0.319	0	EXN	NR3C1
0	1.09022	0.56	0.316	0	EXN	DYNLL1
0	1.17412	0.427	0.183	0	EXN	DLGAP2
0	0.743156	0.494	0.25	0	EXN	GAS7
0	0.503785	0.719	0.476	0	EXN	SLC4A10
0	0.636035	0.732	0.489	0	EXN	THRB
0	0.764005	0.779	0.536	0	EXN	RTN3
0	0.663898	0.649	0.406	0	EXN	CACNA1C
0	2.22434	0.311	0.069	0	EXN	ANKRD33B
0	0.647814	0.625	0.383	0	EXN	DYNC1I1
0	0.397643	0.793	0.551	0	EXN	GRM5
0	1.70448	0.345	0.103	0	EXN	FXYD7
0	0.356469	0.657	0.417	0	EXN	TSPAN5
0	0.539543	0.711	0.471	0	EXN	RASAL2
0	0.570924	0.538	0.299	0	EXN	SCN3A
0	0.54074	0.658	0.419	0	EXN	HERC1
0	0.627287	0.457	0.218	0	EXN	FEZ2
0	0.67688	0.698	0.459	0	EXN	PLEKHA5
0	0.595803	0.662	0.424	0	EXN	SYN2
0	1.87426	0.324	0.086	0	EXN	COL24A1
0	1.91746	0.329	0.091	0	EXN	COL5A2
0	0.883094	0.394	0.156	0	EXN	FAM13A
0	1.74226	0.333	0.095	0	EXN	SYNPO2
0	1.31754	0.391	0.153	0	EXN	SLIT1
0	0.870336	0.474	0.236	0	EXN	RP11-289H16.1
0	0.770185	0.584	0.346	0	EXN	ARL15
0	1.02806	0.503	0.265	0	EXN	CAP2
0	1.43877	0.366	0.128	0	EXN	CAMKK2
0	1.16332	0.578	0.34	0	EXN	YWHAG
0	0.953823	0.442	0.205	0	EXN	NDST3
0	1.73173	0.325	0.088	0	EXN	NIPAL2
0	1.32293	0.411	0.174	0	EXN	RP11-586K2.1
0	0.589519	0.573	0.336	0	EXN	MNAT1
0	0.738098	0.8	0.564	0	EXN	RIMS2
0	0.844599	0.562	0.326	0	EXN	CAMK2B
0	0.730345	0.474	0.238	0	EXN	WDR17
0	0.77864	0.484	0.248	0	EXN	SCAI
0	0.830236	0.617	0.381	0	EXN	ENO2
0	1.0144	0.405	0.17	0	EXN	RP11-116O11.1
0	0.971271	0.452	0.217	0	EXN	MICAL2
0	2.12202	0.309	0.074	0	EXN	RXFP1
0	0.43815	0.823	0.588	0	EXN	OXR1
0	0.568349	0.624	0.389	0	EXN	GABBR2
0	0.921847	0.581	0.346	0	EXN	SNAP25-AS1
0	0.947879	0.478	0.243	0	EXN	KCNQ2
0	0.252776	0.395	0.161	0	EXN	MYO1D
0	0.543395	0.598	0.364	0	EXN	CD47
0	0.993544	0.418	0.184	0	EXN	P2RY14
0	0.701428	0.437	0.203	0	EXN	EXOC6
0	0.447544	0.728	0.494	0	EXN	TRIM9
0	0.754413	0.531	0.298	0	EXN	EML6
0	0.50292	0.657	0.424	0	EXN	SLC2A13
0	1.15954	0.389	0.156	0	EXN	KCNH5
0	0.649	0.479	0.246	0	EXN	RPS6KC1
0	1.81102	0.896	0.663	0	EXN	KCNIP4
0	1.76582	0.315	0.082	0	EXN	AC091878.1
0	2.53169	0.284	0.051	0	EXN	NPTX1
0	0.836622	0.524	0.292	0	EXN	GABRG2
0	2.75646	0.272	0.04	0	EXN	RP11-321E2.3
0	1.24242	0.394	0.162	0	EXN	NREP
0	1.33701	0.495	0.263	0	EXN	STMN2
0	0.595693	0.694	0.462	0	EXN	RIMS1
0	1.12833	0.457	0.226	0	EXN	PRKAR1B
0	0.305567	0.663	0.433	0	EXN	CACNB2
0	0.592144	0.66	0.43	0	EXN	TSC22D1
0	0.640805	0.603	0.373	0	EXN	SNAP91
0	1.12433	0.421	0.191	0	EXN	EPHB6
0	2.00631	0.367	0.137	0	EXN	NEFL
0	0.576148	0.525	0.296	0	EXN	TARBP1
0	0.366661	0.626	0.397	0	EXN	MYO5A
0	0.417204	0.651	0.423	0	EXN	CACNB4
0	1.07287	0.397	0.169	0	EXN	PRKAR2B
0	2.77944	0.267	0.039	0	EXN	RP11-75C9.2
0	1.05272	0.413	0.185	0	EXN	RAP1GAP2
0	1.00078	0.469	0.241	0	EXN	SYN3
0	0.731702	0.528	0.301	0	EXN	FAM49A
0	0.292016	0.639	0.412	0	EXN	NAV3
0	0.494477	0.579	0.352	0	EXN	EPB41L3
0	0.469491	0.81	0.584	0	EXN	MAP2
0	1.02611	0.461	0.235	0	EXN	ELAVL4
0	0.655668	0.642	0.416	0	EXN	CELF4
0	0.497137	0.614	0.388	0	EXN	STXBP5
0	0.644149	0.869	0.643	0	EXN	OPCML
0	0.575566	0.578	0.352	0	EXN	NAP1L1
0	0.271369	0.561	0.336	0	EXN	PTPRT
0	0.546688	0.636	0.412	0	EXN	UNC80
0	0.335308	0.549	0.326	0	EXN	GTDC1
0	0.819612	0.386	0.163	0	EXN	TRHDE
0	0.277432	0.705	0.482	0	EXN	UBE2E2
0	0.539921	0.601	0.378	0	EXN	PDE10A
0	0.340202	0.604	0.381	0	EXN	ASAP1
0	0.403403	0.623	0.4	0	EXN	RAB11A
0	1.25978	0.328	0.106	0	EXN	MAN1A1
0	0.914031	0.444	0.222	0	EXN	RUNDC3A
0	0.411111	0.685	0.464	0	EXN	MYT1L
0	0.636802	0.665	0.444	0	EXN	PREPL
0	0.356367	0.534	0.313	0	EXN	CDH2
0	1.38988	0.344	0.123	0	EXN	COL26A1
0	0.473739	0.625	0.404	0	EXN	LARGE
0	0.614911	0.556	0.336	0	EXN	SERPINI1
0	0.876228	0.455	0.235	0	EXN	MIAT
0	0.996574	0.379	0.159	0	EXN	LMO7
0	2.18764	0.287	0.067	0	EXN	C1orf115
0	0.580471	0.595	0.375	0	EXN	CERS6
0	0.490788	0.763	0.543	0	EXN	PPFIA2
0	0.362869	0.668	0.449	0	EXN	FMN2
0	0.478978	0.651	0.432	0	EXN	CSRNP3
0	1.17405	0.513	0.294	0	EXN	THY1
0	1.02063	0.373	0.154	0	EXN	IGSF10
0	0.668002	0.595	0.376	0	EXN	MCTP1
0	0.786014	0.562	0.344	0	EXN	PJA2
0	0.267153	0.538	0.32	0	EXN	CPE
0	0.364086	0.651	0.433	0	EXN	HCN1
0	1.09537	0.364	0.146	0	EXN	HS3ST4
0	0.413017	0.788	0.571	0	EXN	TENM2
0	0.391547	0.503	0.286	0	EXN	ACAP3
0	0.612772	0.534	0.317	0	EXN	HIVEP2
0	0.660978	0.673	0.456	0	EXN	IDS
0	0.843508	0.46	0.243	0	EXN	CELF5
0	0.695461	0.506	0.29	0	EXN	KSR2
0	0.579981	0.84	0.624	0	EXN	GRIA2
0	1.37553	0.296	0.08	0	EXN	FOXP2
0	0.708322	0.803	0.588	0	EXN	RGS7
0	0.83725	0.395	0.18	0	EXN	TBRG1
0	0.460672	0.642	0.427	0	EXN	TANC2
0	0.78147	0.616	0.401	0	EXN	SYP
0	0.849775	0.491	0.276	0	EXN	RP1-78O14.1
0	0.639837	0.915	0.701	0	EXN	RBFOX1
0	0.725018	0.458	0.244	0	EXN	ACTR2
0	0.999167	0.394	0.18	0	EXN	PTPRR
0	0.277423	0.481	0.267	0	EXN	CCK
0	1.82127	0.296	0.082	0	EXN	NWD2
0	0.702049	0.453	0.24	0	EXN	EPHA5
0	0.445873	0.67	0.457	0	EXN	PCLO
0	1.11905	0.337	0.124	0	EXN	MMP17
0	1.10423	0.458	0.245	0	EXN	YWHAB
0	1.10707	0.36	0.147	0	EXN	SSBP3
0	1.19526	0.348	0.135	0	EXN	FAM153A
0	0.392562	0.557	0.345	0	EXN	BTBD9
0	1.47731	0.319	0.107	0	EXN	RP11-673E1.4
0	1.01173	0.381	0.169	0	EXN	SSX2IP
0	0.892481	0.419	0.207	0	EXN	STXBP5-AS1
0	0.372262	0.371	0.159	0	EXN	LHFP
0	0.573235	0.77	0.558	0	EXN	DMD
0	0.300503	0.568	0.356	0	EXN	PCDH9-AS2
0	0.461312	0.694	0.482	0	EXN	UNC79
0	1.13814	0.297	0.085	0	EXN	TYRO3
0	0.625023	0.803	0.592	0	EXN	CCSER1
0	1.08711	0.394	0.183	0	EXN	ADD2
0	1.3227	0.313	0.102	0	EXN	LRTM1
0	0.312208	0.639	0.428	0	EXN	KCNQ3
0	0.358275	0.539	0.328	0	EXN	ARHGEF7
0	0.432579	0.796	0.586	0	EXN	LRRC7
0	0.570932	0.562	0.352	0	EXN	CCNI
0	0.434141	0.541	0.331	0	EXN	GPR158
0	2.16427	0.268	0.058	0	EXN	CTA-276F8.2
0	1.16047	0.426	0.216	0	EXN	TAGLN3
0	1.06951	0.372	0.162	0	EXN	ADAM11
0	0.996553	0.38	0.17	0	EXN	KCNB1
0	0.335599	0.729	0.519	0	EXN	TTC3
0	0.364979	0.787	0.578	0	EXN	CNTN1
0	0.521512	0.678	0.469	0	EXN	NSF
0	0.611643	0.459	0.25	0	EXN	NISCH
0	1.19886	0.335	0.126	0	EXN	RAP2A
0	1.42251	0.363	0.154	0	EXN	TOLLIP
0	0.256775	0.584	0.375	0	EXN	TBL1XR1
0	0.632606	0.867	0.658	0	EXN	PLCB1
0	1.09108	0.406	0.198	0	EXN	BSN
0	0.415669	0.637	0.429	0	EXN	FAM19A2
0	1.68065	0.32	0.112	0	EXN	NUDT4
0	0.865254	0.544	0.336	0	EXN	SEPW1
0	0.762691	0.49	0.282	0	EXN	MAPK1
0	0.538067	0.421	0.213	0	EXN	RANBP9
0	1.10118	0.376	0.168	0	EXN	MTURN
0	0.644796	0.591	0.383	0	EXN	AC016831.7
0	0.706065	0.599	0.391	0	EXN	NDRG4
0	0.521625	0.449	0.242	0	EXN	RASA2
0	0.879867	0.35	0.143	0	EXN	NPAS2
0	0.613205	0.419	0.212	0	EXN	ICA1L
0	2.63071	0.244	0.037	0	EXN	NRN1
0	0.897147	0.413	0.206	0	EXN	HSPH1
0	0.47734	0.607	0.4	0	EXN	PTPRN2
0	0.54037	0.547	0.341	0	EXN	NCKAP1
0	1.87874	0.274	0.068	0	EXN	RFTN1
0	0.498397	0.515	0.309	0	EXN	NR2F1-AS1
0	0.345551	0.657	0.451	0	EXN	UNC5D
0	2.30926	0.262	0.056	0	EXN	HTR2A
0	0.313261	0.533	0.327	0	EXN	GPC6
0	0.36726	0.571	0.365	0	EXN	GDAP1
0	0.463789	0.578	0.372	0	EXN	SPTBN4
0	0.674468	0.323	0.118	0	EXN	ATP2B4
0	0.714064	0.458	0.253	0	EXN	GUK1
0	0.537899	0.535	0.33	0	EXN	PDZD2
0	0.942533	0.316	0.111	0	EXN	LAMA2
0	0.343201	0.528	0.323	0	EXN	ARHGEF12
0	1.10588	0.332	0.127	0	EXN	RP11-473C19.1
0	0.410289	0.431	0.226	0	EXN	FARS2
0	0.455148	0.751	0.546	0	EXN	MAPK10
0	0.646557	0.48	0.275	0	EXN	ATP9A
0	0.671094	0.634	0.43	0	EXN	EIF4A2
0	0.919248	0.402	0.198	0	EXN	GLRB
0	0.508037	0.459	0.255	0	EXN	PARP8
0	0.8829	0.365	0.161	0	EXN	SLC8A1-AS1
0	0.770107	0.415	0.211	0	EXN	ATL1
0	0.543971	0.677	0.474	0	EXN	KCTD16
0	2.28858	0.254	0.051	0	EXN	IPCEF1
0	0.360278	0.641	0.438	0	EXN	LINC-PINT
0	0.618836	0.459	0.256	0	EXN	DPY19L2
0	0.683238	0.354	0.151	0	EXN	PTCHD1-AS
0	0.308606	0.676	0.474	0	EXN	SYNE1
0	1.1493	0.326	0.124	0	EXN	CPNE8
0	1.53844	0.297	0.095	0	EXN	CAMKK1
0	0.441061	0.547	0.346	0	EXN	RFX3
0	0.497676	0.492	0.291	0	EXN	RAPH1
0	2.0941	0.303	0.102	0	EXN	CTC-340A15.2
0	0.343832	0.657	0.456	0	EXN	NTRK3
0	1.81091	0.28	0.079	0	EXN	CRYM
0	0.310674	0.762	0.561	0	EXN	NBEA
0	2.1862	0.256	0.056	0	EXN	SLC30A3
0	1.08181	0.466	0.266	0	EXN	TSPYL1
0	1.06398	0.399	0.199	0	EXN	PCMT1
0	0.724044	0.483	0.283	0	EXN	PPP3CB
0	0.549584	0.432	0.232	0	EXN	DZIP3
0	1.10696	0.41	0.21	0	EXN	PGM2L1
0	1.1502	0.845	0.645	0	EXN	PDE4D
0	0.894154	0.566	0.366	0	EXN	LINC00657
0	1.31412	0.309	0.11	0	EXN	LNX1
0	0.729441	0.394	0.195	0	EXN	KIAA0319
0	0.424932	0.439	0.24	0	EXN	PLEKHA1
0	0.441793	0.445	0.246	0	EXN	TLN2
0	1.6788	0.253	0.054	0	EXN	AC007192.6
0	1.54983	0.296	0.097	0	EXN	DLGAP1-AS4
0	0.486951	0.564	0.365	0	EXN	KIF5C
0	0.734151	0.474	0.275	0	EXN	CLSTN3
0	0.61668	0.433	0.235	0	EXN	CCDC85A
0	0.972158	0.378	0.18	0	EXN	FAM153C
0	1.44224	0.325	0.127	0	EXN	CUX2
0	0.535013	0.524	0.326	0	EXN	MAP2K1
0	0.671663	0.415	0.217	0	EXN	ATP6V1H
0	0.362107	0.411	0.213	0	EXN	FAM171A1
0	1.12963	0.36	0.162	0	EXN	TTC9B
0	0.449032	0.539	0.342	0	EXN	KIF3A
0	0.551092	0.637	0.44	0	EXN	TMEM178B
0	0.437533	0.456	0.259	0	EXN	NETO1
0	1.40318	0.295	0.098	0	EXN	UNC5A
0	0.356664	0.693	0.496	0	EXN	SIPA1L1
0	0.795936	0.387	0.191	0	EXN	AC007246.3
0	0.61055	0.462	0.266	0	EXN	MIR124-2HG
0	0.7092	0.41	0.214	0	EXN	WNK2
0	0.668396	0.339	0.144	0	EXN	FGFR1OP2
0	0.375917	0.505	0.31	0	EXN	PCNXL2
0	0.659154	0.442	0.247	0	EXN	RP11-778J15.1
0	0.703815	0.439	0.244	0	EXN	AMPH
0	2.08799	0.256	0.061	0	EXN	MAL2
0	0.517026	0.492	0.297	0	EXN	SHANK2
0	0.496052	0.481	0.286	0	EXN	CIT
0	0.792215	0.842	0.647	0	EXN	LRRTM4
0	0.581487	0.598	0.403	0	EXN	NDFIP1
0	0.300649	0.769	0.575	0	EXN	SNTG1
0	2.27402	0.247	0.053	0	EXN	ZBBX
0	0.92389	0.383	0.189	0	EXN	UNC13A
0	0.701339	0.388	0.195	0	EXN	ZFYVE28
0	0.36493	0.597	0.404	0	EXN	RAPGEF4
0	0.561586	0.367	0.175	0	EXN	PAPSS1
0	1.23391	0.315	0.123	0	EXN	KCNV2
0	0.417105	0.491	0.299	0	EXN	MAP2K4
0	1.04938	0.445	0.253	0	EXN	NAPB
0	0.438236	0.308	0.116	0	EXN	LGI4
0	1.46948	0.283	0.091	0	EXN	DOC2A
0	0.453271	0.581	0.389	0	EXN	LINC00632
0	1.50267	0.272	0.081	0	EXN	DNAH6
0	0.393117	0.433	0.242	0	EXN	PLCL2
0	0.711897	0.382	0.191	0	EXN	FBXL2
0	0.531488	0.419	0.228	0	EXN	PLEKHA6
0	0.887899	0.419	0.228	0	EXN	BCYRN1
0	0.401506	0.417	0.226	0	EXN	UBE2E3
0	0.307665	0.753	0.562	0	EXN	AKT3
0	0.41407	0.575	0.384	0	EXN	NCALD
0	0.29801	0.474	0.284	0	EXN	RABGAP1
0	0.253493	0.531	0.341	0	EXN	CELF1
0	0.615959	0.326	0.136	0	EXN	KCNMB4
0	0.644431	0.383	0.193	0	EXN	SIRPA
0	0.829984	0.357	0.167	0	EXN	BTBD10
0	0.460613	0.469	0.279	0	EXN	ANKRD30BL
0	0.463139	0.37	0.181	0	EXN	DDAH1
0	0.533559	0.386	0.197	0	EXN	MTA3
0	0.698392	0.447	0.258	0	EXN	LONRF2
0	1.76611	0.257	0.068	0	EXN	HOPX
0	2.38202	0.235	0.046	0	EXN	CTC-552D5.1
0	0.34743	0.478	0.289	0	EXN	R3HDM2
0	0.428483	0.439	0.25	0	EXN	APBA2
0	0.611815	0.592	0.403	0	EXN	CLSTN1
0	0.339859	0.543	0.355	0	EXN	AEBP2
0	0.831544	0.401	0.213	0	EXN	CAMKV
0	1.04908	0.45	0.262	0	EXN	BEX1
0	0.791038	0.351	0.163	0	EXN	ASXL3
0	0.460366	0.775	0.588	0	EXN	RTN4
0	0.334818	0.54	0.353	0	EXN	ADAM22
0	0.865379	0.319	0.132	0	EXN	GULP1
0	1.54755	0.269	0.082	0	EXN	CELF2-AS2
0	1.01271	0.431	0.245	0	EXN	NCDN
0	0.725136	0.434	0.248	0	EXN	ADCY1
0	1.46565	0.261	0.075	0	EXN	CRIP2
0	1.41604	0.248	0.062	0	EXN	LRRK1
0	1.33049	0.3	0.114	0	EXN	HLF
0	1.53154	0.271	0.085	0	EXN	SLC8A2
0	0.657313	0.419	0.233	0	EXN	TMEM178A
0	1.28029	0.286	0.1	0	EXN	SH3BGRL2
0	1.37056	0.283	0.097	0	EXN	CCDC3
0	0.74218	0.347	0.161	0	EXN	SPATS2
0	0.740153	0.395	0.21	0	EXN	ST8SIA5
0	0.497008	0.481	0.296	0	EXN	KIFAP3
0	0.412077	0.483	0.298	0	EXN	GPC1
0	0.474184	0.481	0.296	0	EXN	TENM4
0	1.03355	0.322	0.137	0	EXN	PDZRN4
0	0.935993	0.455	0.27	0	EXN	C14orf2
0	0.57943	0.419	0.234	0	EXN	ARMC9
0	0.298892	0.528	0.344	0	EXN	MAPT
0	1.23731	0.278	0.094	0	EXN	MAPK11
0	0.733149	0.376	0.192	0	EXN	AP3S1
0	0.533477	0.369	0.185	0	EXN	VPS41
0	1.06073	0.322	0.138	0	EXN	EPB41L4B
0	0.309586	0.579	0.395	0	EXN	PDXDC1
0	1.24037	0.331	0.148	0	EXN	C9orf16
0	1.44614	0.271	0.088	0	EXN	MEIS3
0	1.07976	0.367	0.184	0	EXN	KCNAB2
0	1.33458	0.263	0.08	0	EXN	RP11-53O19.1
0	0.453005	0.423	0.24	0	EXN	CMIP
0	0.354501	0.412	0.229	0	EXN	MAGI3
0	1.2284	0.345	0.162	0	EXN	MLLT11
0	0.436235	0.665	0.483	0	EXN	DPYSL2
0	1.05764	0.342	0.16	0	EXN	TSPAN13
0	0.740275	0.356	0.174	0	EXN	PGBD5
0	1.05607	0.3	0.118	0	EXN	CHRM3-AS2
0	0.409334	0.382	0.2	0	EXN	DNAJC1
0	0.848101	0.352	0.17	0	EXN	C11orf80
0	0.633199	0.395	0.214	0	EXN	RAPGEFL1
0	2.39822	0.228	0.047	0	EXN	MSC-AS1
0	0.99812	0.321	0.14	0	EXN	LIN7A
0	0.283714	0.503	0.322	0	EXN	MPRIP
0	0.576979	0.873	0.693	0	EXN	CSMD1
0	1.02985	0.302	0.122	0	EXN	RP11-475O6.1
0	0.969869	0.431	0.251	0	EXN	CFL1
0	0.53769	0.353	0.173	0	EXN	USP25
0	1.34907	0.274	0.095	0	EXN	STARD4-AS1
0	0.484673	0.457	0.278	0	EXN	UBE2B
0	0.662536	0.48	0.301	0	EXN	SLC12A5
0	0.819495	0.348	0.169	0	EXN	NLRP1
0	0.411963	0.46	0.282	0	EXN	RAB6A
0	1.20975	0.34	0.162	0	EXN	LYNX1
0	1.03027	0.389	0.211	0	EXN	CDK5R1
0	0.278609	0.431	0.253	0	EXN	RGL1
0	0.567913	0.378	0.2	0	EXN	TPPP
0	0.475434	0.35	0.172	0	EXN	TNPO1
0	0.965293	0.29	0.112	0	EXN	RAB40C
0	1.88651	0.236	0.058	0	EXN	CDH22
0	0.416288	0.4	0.223	0	EXN	PPP2R5C
0	0.250705	0.44	0.263	0	EXN	RFWD2
0	0.310411	0.563	0.386	0	EXN	XKR6
0	1.07055	0.317	0.141	0	EXN	RAB15
0	0.906176	0.326	0.15	0	EXN	RAB27B
0	1.24505	0.303	0.127	0	EXN	RIMS3
0	0.508925	0.375	0.199	0	EXN	PUM3
0	2.44726	0.226	0.05	0	EXN	RP11-314P15.2
0	0.498441	0.441	0.265	0	EXN	ARHGAP44
0	0.51985	0.344	0.168	0	EXN	BAALC
0	1.26324	0.266	0.091	0	EXN	RP13-578N3.3
0	0.849152	0.326	0.151	0	EXN	SLF1
0	0.787191	0.33	0.155	0	EXN	LMTK2
0	1.11933	0.325	0.15	0	EXN	DMTN
0	2.11978	0.23	0.055	0	EXN	CTXN1
0	0.562025	0.445	0.27	0	EXN	FRRS1L
0	1.39185	0.314	0.139	0	EXN	SYT4
0	0.305126	0.472	0.297	0	EXN	USP9Y
0	0.831001	0.278	0.104	0	EXN	AGRN
0	0.337416	0.393	0.219	0	EXN	PPHLN1
0	0.816705	0.333	0.159	0	EXN	FBXO34
0	1.6139	0.243	0.069	0	EXN	ETS2
0	0.922339	0.344	0.17	0	EXN	NRSN1
0	0.567385	0.458	0.285	0	EXN	MORF4L2
0	1.24236	0.269	0.096	0	EXN	ARHGAP26-AS1
0	0.592026	0.318	0.145	0	EXN	CES4A
0	0.296892	0.448	0.275	0	EXN	RNF150
0	2.17775	0.211	0.038	0	EXN	RP5-1101C3.1
0	1.1459	0.288	0.115	0	EXN	RHOBTB2
0	0.470926	0.437	0.264	0	EXN	PAK7
0	0.563324	0.385	0.213	0	EXN	INPP4A
0	1.05403	0.377	0.205	0	EXN	RAB6B
0	2.11965	0.226	0.054	0	EXN	SLC22A10
0	0.338549	0.417	0.245	0	EXN	CDC42SE2
0	1.06266	0.415	0.243	0	EXN	SNCB
0	0.982892	0.36	0.188	0	EXN	IL1RAPL2
0	0.291003	0.741	0.57	0	EXN	JMJD1C
0	1.02974	0.313	0.142	0	EXN	RP11-390N6.1
0	1.25346	0.312	0.141	0	EXN	WSB2
0	0.314518	0.409	0.238	0	EXN	PRDM2
0	0.687317	0.374	0.203	0	EXN	GFOD1
0	0.758539	0.427	0.256	0	EXN	KIF5A
0	1.01567	0.279	0.109	0	EXN	POLN
0	0.645967	0.343	0.173	0	EXN	SLITRK5
0	0.803097	0.387	0.217	0	EXN	RHEB
0	0.925985	0.271	0.101	0	EXN	KATNAL1
0	0.288373	0.31	0.14	0	EXN	COL11A1
0	0.287696	0.429	0.259	0	EXN	RAB3GAP1
0	0.413912	0.416	0.246	0	EXN	DMXL2
0	0.52567	0.472	0.302	0	EXN	YWHAE
0	0.926249	0.368	0.198	0	EXN	SERINC3
0	0.39692	0.453	0.284	0	EXN	ATP6V0A1
0	0.869003	0.338	0.169	0	EXN	COX7A2L
0	0.711906	0.374	0.205	0	EXN	ELMOD1
0	0.75214	0.296	0.127	0	EXN	PLXNA2
0	0.808418	0.306	0.137	0	EXN	AKAP12
0	0.922977	0.3	0.131	0	EXN	ZYX
0	0.553145	0.349	0.18	0	EXN	LRRC28
0	0.642382	0.454	0.286	0	EXN	ATP6V1A
0	0.85526	0.343	0.175	0	EXN	PSD
0	3.37552	0.191	0.023	0	EXN	XX-CR54.1
0	0.930705	0.365	0.197	0	EXN	TOMM20
0	0.31913	0.351	0.183	0	EXN	GABRA2
0	0.405194	0.406	0.239	0	EXN	KIAA0825
0	0.902116	0.309	0.142	0	EXN	JAKMIP1
0	0.718861	0.375	0.208	0	EXN	HPRT1
0	0.594877	0.397	0.23	0	EXN	RP11-649G15.2
0	0.686823	0.332	0.165	0	EXN	RP11-315E17.1
0	2.60778	0.2	0.033	0	EXN	LINC00507
0	0.814274	0.432	0.265	0	EXN	PPIA
0	0.99825	0.303	0.136	0	EXN	RP5-1187M17.10
0	0.533896	0.275	0.109	0	EXN	DNAH7
0	1.13814	0.328	0.162	0	EXN	SNX10
0	0.453922	0.31	0.144	0	EXN	ACTN4
0	0.795806	0.301	0.135	0	EXN	CMTM4
0	1.10761	0.275	0.11	0	EXN	IQSEC2
0	0.374412	0.338	0.173	0	EXN	TACC1
0	0.558411	0.272	0.107	0	EXN	LRRK2
0	0.648053	0.378	0.213	0	EXN	CAPZA2
0	0.856681	0.331	0.166	0	EXN	DSTN
0	1.19782	0.294	0.129	0	EXN	MTPN
0	0.662994	0.299	0.134	0	EXN	TMX3
0	0.681909	0.432	0.267	0	EXN	SYNGR1
0	0.536629	0.461	0.297	0	EXN	GDI1
0	0.436734	0.394	0.23	0	EXN	RANBP2
0	1.19875	0.264	0.1	0	EXN	OPTN
0	0.284117	0.332	0.168	0	EXN	CDK17
0	0.371677	0.394	0.23	0	EXN	TASP1
0	0.870035	0.296	0.132	0	EXN	TNFRSF25
0	0.691528	0.343	0.18	0	EXN	KLHL29
0	0.763587	0.392	0.229	0	EXN	SUB1
0	1.17833	0.219	0.056	0	EXN	DENND3
0	0.322188	0.421	0.258	0	EXN	NME7
0	0.847972	0.443	0.28	0	EXN	ATP6V1B2
0	0.299729	0.412	0.249	0	EXN	PTPRO
0	0.812089	0.316	0.154	0	EXN	ABLIM2
0	1.009	0.323	0.161	0	EXN	SNX3
0	0.391193	0.384	0.222	0	EXN	TIAM2
0	0.555368	0.378	0.216	0	EXN	ANO5
0	0.424709	0.382	0.22	0	EXN	RP11-219A15.1
0	0.587079	0.344	0.182	0	EXN	PKIA
0	0.499851	0.344	0.182	0	EXN	BRSK2
0	0.770499	0.327	0.166	0	EXN	LMBRD2
0	0.592191	0.373	0.212	0	EXN	RPS14
0	0.497779	0.375	0.214	0	EXN	ARHGEF9
0	0.648416	0.383	0.222	0	EXN	PNMA3
0	1.08335	0.253	0.092	0	EXN	MIR4500HG
0	0.821927	0.328	0.167	0	EXN	JPH4
0	0.46835	0.367	0.206	0	EXN	C16orf52
0	1.0908	0.287	0.126	0	EXN	PTMS
0	0.898699	0.263	0.103	0	EXN	DPY19L1
0	0.847542	0.381	0.221	0	EXN	HINT1
0	1.07008	0.249	0.089	0	EXN	CTC-459F4.3
0	0.602035	0.363	0.203	0	EXN	SYT16
0	0.906954	0.342	0.183	0	EXN	KIF3C
0	0.361516	0.373	0.214	0	EXN	IGSF8
0	0.299575	0.392	0.233	0	EXN	CTDSPL
0	0.587738	0.327	0.168	0	EXN	RP11-499P20.2
0	0.522733	0.844	0.685	0	EXN	ANKS1B
0	0.515481	0.341	0.183	0	EXN	GCC2
0	1.01427	0.277	0.119	0	EXN	STAT4
0	2.01003	0.228	0.07	0	EXN	CTC-535M15.2
0	0.54901	0.298	0.14	0	EXN	MYSM1
0	0.684988	0.285	0.127	0	EXN	LRFN2
0	1.28108	0.237	0.079	0	EXN	CDYL2
0	0.550427	0.336	0.179	0	EXN	PRKCI
0	0.704968	0.44	0.283	0	EXN	SKP1
0	0.83769	0.332	0.175	0	EXN	NDUFA5
0	0.952334	0.281	0.124	0	EXN	BAIAP3
0	1.20994	0.218	0.061	0	EXN	KCNIP3
0	0.307978	0.365	0.208	0	EXN	ZC2HC1A
0	0.322566	0.383	0.226	0	EXN	SESN3
0	0.78652	0.348	0.191	0	EXN	RPL31
0	1.58518	0.201	0.045	0	EXN	SEC24D
0	0.645302	0.262	0.106	0	EXN	SKAP2
0	0.429754	0.312	0.156	0	EXN	ME1
0	0.482144	0.382	0.226	0	EXN	ZFAND5
0	1.11666	0.245	0.089	0	EXN	AACS
0	0.544987	0.39	0.234	0	EXN	TMOD2
0	1.98341	0.202	0.047	0	EXN	GLRA3
0	0.317512	0.332	0.177	0	EXN	TBC1D32
0	1.29468	0.259	0.104	0	EXN	AP1S1
0	0.925519	0.276	0.121	0	EXN	KIAA1549
0	0.877537	0.268	0.113	0	EXN	C8orf46
0	1.46353	0.233	0.078	0	EXN	GALNT9
0	0.850418	0.39	0.235	0	EXN	SULT4A1
0	2.22625	0.222	0.067	0	EXN	NEFM
0	0.481674	0.463	0.309	0	EXN	CAMK2D
0	0.459491	0.309	0.155	0	EXN	HACE1
0	1.01935	0.236	0.082	0	EXN	SNED1
0	0.637489	0.344	0.19	0	EXN	SYNJ1
0	0.624282	0.328	0.175	0	EXN	AGAP3
0	0.274018	0.358	0.205	0	EXN	ZNF721
0	1.72679	0.24	0.087	0	EXN	PCP4
0	0.413478	0.356	0.203	0	EXN	LARP1B
0	0.380574	0.346	0.193	0	EXN	RPS6KA3
0	0.897236	0.27	0.118	0	EXN	CTD-2337A12.1
0	0.838854	0.333	0.181	0	EXN	GABARAPL1
0	2.62873	0.183	0.031	0	EXN	SLC38A11
0	1.31552	0.242	0.09	0	EXN	PLK2
0	0.915665	0.307	0.155	0	EXN	PCDH9-AS1
0	0.520375	0.288	0.136	0	EXN	GPATCH2
0	0.57116	0.286	0.134	0	EXN	ETV5
0	0.66791	0.288	0.136	0	EXN	AC058791.1
0	0.377013	0.35	0.198	0	EXN	GOLGA8A
0	1.75224	0.218	0.067	0	EXN	SYNPO
0	0.82984	0.304	0.153	0	EXN	STEAP2
0	0.460737	0.356	0.205	0	EXN	RNPS1
0	0.923368	0.352	0.201	0	EXN	CCDC85B
0	0.384022	0.345	0.194	0	EXN	CATSPER2
0	0.966834	0.225	0.075	0	EXN	FRMD6
0	2.62225	0.177	0.027	0	EXN	NEUROD6
0	1.18866	0.235	0.085	0	EXN	AC007563.5
0	0.378617	0.347	0.197	0	EXN	TOM1L1
0	0.772634	0.252	0.103	0	EXN	IGSF21
0	1.5003	0.196	0.047	0	EXN	USP43
0	0.817091	0.33	0.181	0	EXN	TMX4
0	0.788682	0.382	0.233	0	EXN	BEX2
0	0.664142	0.38	0.231	0	EXN	RPL7
0	0.734016	0.359	0.21	0	EXN	PIN1
0	1.61034	0.221	0.073	0	EXN	HPCA
0	0.891095	0.322	0.174	0	EXN	PACSIN1
0	0.68003	0.28	0.132	0	EXN	GOLT1B
0	0.548888	0.334	0.186	0	EXN	SLC16A7
0	0.971447	0.251	0.103	0	EXN	RP11-420N3.2
0	0.416889	0.34	0.192	0	EXN	TTC39C
0	0.271984	0.245	0.097	0	EXN	SHROOM3
0	1.50968	0.208	0.06	0	EXN	TCERG1L
0	1.10245	0.244	0.096	0	EXN	CCDC65
0	1.27513	0.244	0.096	0	EXN	SYT5
0	1.74587	0.197	0.05	0	EXN	MFSD4
0	1.55675	0.193	0.046	0	EXN	BHLHE40
0	0.943783	0.232	0.085	0	EXN	CDC40
0	1.65852	0.218	0.071	0	EXN	PHF24
0	1.00934	0.275	0.128	0	EXN	CMAS
0	0.58775	0.863	0.716	0	EXN	FAM155A
0	2.12345	0.19	0.043	0	EXN	RP11-594C13.1
0	0.784964	0.92	0.773	0	EXN	MEG3
0	0.40012	0.312	0.165	0	EXN	CRIM1
0	0.779111	0.317	0.17	0	EXN	NCEH1
0	1.09166	0.291	0.144	0	EXN	BNIP3
0	2.2579	0.179	0.032	0	EXN	RPRML
0	2.37638	0.189	0.043	0	EXN	RP11-380P13.1
0	2.9483	0.17	0.024	0	EXN	KCNV1
0	1.47976	0.217	0.071	0	EXN	RASGRP1
0	0.662746	0.295	0.149	0	EXN	TPM3
0	0.338558	0.312	0.166	0	EXN	ZRANB3
0	0.697183	0.29	0.144	0	EXN	EPHA3
0	0.857596	0.292	0.146	0	EXN	FAM81A
0	1.10452	0.206	0.06	0	EXN	SMAD3
0	0.91389	0.295	0.149	0	EXN	DLG4
0	0.625322	0.312	0.166	0	EXN	SGSM1
0	0.694366	0.283	0.137	0	EXN	SIDT1
0	0.525456	0.349	0.203	0	EXN	RAB11FIP4
0	0.762129	0.252	0.107	0	EXN	ST6GAL2
0	1.86952	0.219	0.074	0	EXN	LINC01090
0	1.16449	0.263	0.118	0	EXN	BRK1
0	1.32199	0.27	0.125	0	EXN	TSHZ2
0	0.421939	0.295	0.15	0	EXN	ADAMTS19
0	0.64289	0.353	0.208	0	EXN	REEP2
0	0.775558	0.284	0.139	0	EXN	CEP126
0	0.322728	0.321	0.177	0	EXN	KPNA1
0	0.901209	0.251	0.107	0	EXN	SEMA3A
0	0.746647	0.229	0.085	0	EXN	UNC13B
0	0.740313	0.336	0.192	0	EXN	CKMT1B
0	0.479235	0.293	0.149	0	EXN	KLHL3
0	0.941864	0.238	0.094	0	EXN	GABRA3
0	1.09595	0.299	0.155	0	EXN	CHGA
0	0.568	0.342	0.199	0	EXN	ENSA
0	0.781374	0.264	0.121	0	EXN	MIR2052HG
0	1.12862	0.247	0.104	0	EXN	AGAP2
0	0.461905	0.277	0.134	0	EXN	TRAF3
0	0.75006	0.279	0.136	0	EXN	RP11-317G6.1
0	1.00949	0.306	0.163	0	EXN	SYN1
0	0.34936	0.31	0.167	0	EXN	CCDC171
0	0.700451	0.283	0.14	0	EXN	SNX32
0	0.527787	0.482	0.339	0	EXN	DCC
0	0.884753	0.226	0.084	0	EXN	DIRC3
0	0.665449	0.326	0.184	0	EXN	RAC1
0	0.486872	0.28	0.138	0	EXN	CORO2B
0	0.358011	0.262	0.12	0	EXN	GLCE
0	0.763174	0.28	0.138	0	EXN	RAB26
0	0.848637	0.225	0.083	0	EXN	ATP8B1
0	1.32884	0.222	0.08	0	EXN	PRKCG
0	0.83591	0.224	0.082	0	EXN	COL6A1
0	1.43557	0.18	0.038	0	EXN	RP11-707A18.1
0	0.322731	0.307	0.165	0	EXN	ZNF706
0	0.884246	0.353	0.211	0	EXN	TPI1
0	0.541719	0.302	0.16	0	EXN	CCDC57
0	1.61599	0.199	0.058	0	EXN	OPN3
0	0.79015	0.268	0.127	0	EXN	HMGCR
0	2.60571	0.166	0.025	0	EXN	LINC01202
0	0.648528	0.248	0.107	0	EXN	RHPN1
0	1.00519	0.249	0.108	0	EXN	ARHGEF25
0	1.50989	0.203	0.062	0	EXN	MMD
0	0.564478	0.291	0.15	0	EXN	CCDC6
0	1.46734	0.209	0.068	0	EXN	PRB2
0	0.403583	0.301	0.16	0	EXN	WIPF2
0	0.801745	0.312	0.172	0	EXN	GUCY1B3
0	1.51224	0.191	0.051	0	EXN	EGR1
0	0.697429	0.277	0.137	0	EXN	RP11-138A9.2
0	0.977843	0.234	0.094	0	EXN	MAP6
0	0.320753	0.298	0.158	0	EXN	NTNG1
0	1.35952	0.205	0.065	0	EXN	CPNE5
0	0.528707	0.308	0.168	0	EXN	RP11-32K4.1
0	0.701261	0.31	0.17	0	EXN	HSPA12A
0	1.65847	0.205	0.065	0	EXN	SNN
0	1.57399	0.204	0.064	0	EXN	NNAT
0	0.5476	0.261	0.122	0	EXN	HNRNPLL
0	1.09893	0.221	0.082	0	EXN	STAMBPL1
0	0.849973	0.249	0.11	0	EXN	PKIG
0	2.36943	0.174	0.035	0	EXN	PCSK1
0	0.472501	0.305	0.166	0	EXN	PTPN11
0	1.35963	0.203	0.065	0	EXN	CPNE9
0	0.714189	0.259	0.121	0	EXN	SRPK1
0	1.20066	0.243	0.105	0	EXN	C11orf87
0	1.64867	0.191	0.053	0	EXN	ARNTL2
0	1.09943	0.219	0.081	0	EXN	NAGPA
0	1.08262	0.251	0.113	0	EXN	ST8SIA3
0	1.68712	0.18	0.042	0	EXN	PKDCC
0	0.521394	0.3	0.162	0	EXN	RP11-231C18.3
0	0.476187	0.309	0.171	0	EXN	ACTR3B
0	0.491009	0.282	0.144	0	EXN	SLC38A6
0	0.542381	0.295	0.157	0	EXN	RP11-123M6.2
0	0.417388	0.304	0.166	0	EXN	CEP112
0	0.812985	0.277	0.14	0	EXN	WDR47
0	0.643971	0.274	0.137	0	EXN	ZDBF2
0	1.20877	0.26	0.123	0	EXN	TUBA4A
0	1.6318	0.212	0.075	0	EXN	TMEM155
0	1.29922	0.229	0.092	0	EXN	LY6E
0	1.27731	0.889	0.752	0	EXN	PTPRD
0	0.587501	0.27	0.133	0	EXN	AC037445.1
0	0.419923	0.308	0.171	0	EXN	BNIP3L
0	1.09812	0.284	0.147	0	EXN	GNG3
0	0.379339	0.296	0.159	0	EXN	RP11-160H12.2
0	2.06588	0.174	0.037	0	EXN	GRASP
0	1.06492	0.22	0.084	0	EXN	CFAP221
0	0.661561	0.256	0.12	0	EXN	HTR1E
0	1.87839	0.169	0.033	0	EXN	MIR222HG
0	1.88125	0.171	0.035	0	EXN	LINC01609
0	1.23368	0.208	0.072	0	EXN	SNTB2
0	1.07913	0.234	0.098	0	EXN	KCTD17
0	0.701815	0.235	0.099	0	EXN	DNAH14
0	0.368686	0.303	0.167	0	EXN	MVD
0	1.39217	0.196	0.061	0	EXN	EXTL1
0	0.308216	0.266	0.131	0	EXN	CLK4
0	0.819481	0.259	0.124	0	EXN	NOXA1
0	1.25133	0.185	0.05	0	EXN	RASL10A
0	0.441232	0.289	0.154	0	EXN	LONRF1
0	1.01736	0.296	0.161	0	EXN	GHITM
0	2.46013	0.165	0.031	0	EXN	RP11-33A14.1
0	0.735525	0.264	0.13	0	EXN	RP11-318K12.2
0	2.05713	0.168	0.034	0	EXN	OTOGL
0	0.416227	0.272	0.138	0	EXN	CABIN1
0	0.545341	0.294	0.16	0	EXN	CAB39
0	2.0682	0.173	0.039	0	EXN	ADAMTS3
0	0.917866	0.237	0.104	0	EXN	DHCR24
0	1.0905	0.224	0.091	0	EXN	PLXNA1
0	0.752376	0.231	0.098	0	EXN	ABTB1
0	1.356	0.203	0.07	0	EXN	DACH1
0	0.46025	0.292	0.159	0	EXN	CASC15
0	0.651839	0.275	0.143	0	EXN	SSBP4
0	0.970973	0.263	0.131	0	EXN	ANXA6
0	0.548804	0.226	0.094	0	EXN	CTNND1
0	0.513931	0.287	0.155	0	EXN	C12orf40
0	0.755156	0.272	0.141	0	EXN	PDZD4
0	0.481126	0.272	0.141	0	EXN	FSD1L
0	1.07049	0.222	0.091	0	EXN	MIR4435-2HG
0	1.12103	0.255	0.124	0	EXN	BEX5
0	1.49531	0.172	0.041	0	EXN	LIMD2
0	0.281263	0.271	0.141	0	EXN	YEATS2
0	0.689572	0.278	0.148	0	EXN	CYP46A1
0	0.612504	0.277	0.147	0	EXN	NIPA1
0	0.813061	0.258	0.128	0	EXN	PPFIA4
0	0.607425	0.232	0.102	0	EXN	NEK11
0	0.69203	0.202	0.072	0	EXN	NRP1
0	0.509846	0.268	0.138	0	EXN	PHLPP2
0	0.501438	0.271	0.142	0	EXN	ARMC2
0	0.578258	0.252	0.123	0	EXN	CCDC30
0	2.2769	0.158	0.029	0	EXN	ZDHHC23
0	1.51301	0.176	0.047	0	EXN	C4orf22
0	0.746552	0.243	0.114	0	EXN	SYNGAP1
0	2.23372	0.159	0.03	0	EXN	MCHR2
0	0.258479	0.234	0.105	0	EXN	FADS3
0	2.67212	0.152	0.023	0	EXN	RP1-251M9.2
0	0.943194	0.228	0.099	0	EXN	LINC01252
0	0.479053	0.234	0.105	0	EXN	ITPK1
0	1.10155	0.237	0.108	0	EXN	FBXL16
0	0.996266	0.239	0.11	0	EXN	PIP5K1C
0	0.538737	0.269	0.141	0	EXN	MARCKS
0	0.545387	0.256	0.128	0	EXN	ALS2
0	0.781978	0.224	0.096	0	EXN	TMEM150C
0	1.01342	0.187	0.059	0	EXN	RP11-454P21.1
0	1.01619	0.195	0.067	0	EXN	TRIM36
0	0.83671	0.255	0.127	0	EXN	KLHDC3
0	0.562818	0.243	0.116	0	EXN	MTMR12
0	0.852596	0.234	0.107	0	EXN	RP11-15E1.5
0	0.757474	0.241	0.114	0	EXN	GOLGA7B
0	0.976376	0.24	0.113	0	EXN	B4GALNT1
0	0.302419	0.249	0.122	0	EXN	STK4
0	1.00426	0.227	0.101	0	EXN	FAM84A
0	0.50345	0.262	0.136	0	EXN	INTS1
0	1.27139	0.194	0.068	0	EXN	LAMB1
0	0.724631	0.221	0.095	0	EXN	CARNMT1
0	0.792431	0.2	0.074	0	EXN	SCPEP1
0	0.896175	0.195	0.07	0	EXN	ARHGEF28
0	0.905299	0.205	0.08	0	EXN	E2F3
0	0.299697	0.21	0.085	0	EXN	RHOBTB1
0	0.493997	0.232	0.108	0	EXN	SLC20A1
0	0.930286	0.211	0.087	0	EXN	FAM102B
0	0.721941	0.223	0.099	0	EXN	EFNB2
0	0.674677	0.245	0.121	0	EXN	AP1G2
0	1.00385	0.177	0.053	0	EXN	MYH9
0	1.00348	0.205	0.081	0	EXN	JPH1
0	2.27185	0.151	0.028	0	EXN	FHL2
0	1.30592	0.18	0.057	0	EXN	NPY1R
0	1.44124	0.165	0.042	0	EXN	SGK223
0	1.23018	0.193	0.07	0	EXN	MPP7
0	1.54432	0.163	0.04	0	EXN	DUSP6
0	1.63094	0.176	0.053	0	EXN	TGFBR3L
0	0.857782	0.238	0.115	0	EXN	CTNNAL1
0	1.10292	0.208	0.085	0	EXN	RTN4RL1
0	1.1397	0.227	0.105	0	EXN	UBE2QL1
0	1.18451	0.21	0.088	0	EXN	KCNJ9
0	2.11677	0.149	0.027	0	EXN	ITPKA
0	0.69768	0.187	0.066	0	EXN	ILDR2
0	0.913764	0.178	0.057	0	EXN	PTPN14
0	2.36508	0.148	0.027	0	EXN	SCHLAP1
0	0.363772	0.865	0.744	0	EXN	NRG3
0	0.569526	0.222	0.101	0	EXN	DDRGK1
0	0.876654	0.206	0.085	0	EXN	RPGRIP1L
0	1.71937	0.165	0.045	0	EXN	CACNB3
0	2.9093	0.139	0.019	0	EXN	NEUROD2
0	1.31454	0.207	0.087	0	EXN	CDK5R2
0	0.681518	0.209	0.089	0	EXN	FBXO32
0	0.438912	0.231	0.112	0	EXN	TBC1D1
0	1.0664	0.191	0.072	0	EXN	GFRA2
0	0.517898	0.221	0.102	0	EXN	ATF7IP2
0	0.956103	0.181	0.062	0	EXN	MAOB
0	2.72171	0.143	0.024	0	EXN	RP11-421P23.1
0	0.736182	0.213	0.094	0	EXN	COG1
0	0.642931	0.236	0.117	0	EXN	DGKH
0	0.816999	0.226	0.108	0	EXN	RNF165
0	0.847228	0.18	0.062	0	EXN	AC008067.2
0	1.81613	0.153	0.035	0	EXN	VIPR1
0	1.01119	0.212	0.095	0	EXN	SYT12
0	0.981221	0.238	0.121	0	EXN	SUMO3
0	1.12146	0.202	0.086	0	EXN	EFHD2
0	1.31844	0.169	0.053	0	EXN	KIAA1462
0	0.858391	0.2	0.084	0	EXN	S100A6
0	1.09935	0.196	0.08	0	EXN	ARPC5L
0	0.364689	0.22	0.104	0	EXN	BICC1
0	0.816844	0.206	0.09	0	EXN	PREP
0	1.75858	0.154	0.038	0	EXN	LZTS1
0	0.407333	0.203	0.088	0	EXN	PTPRF
0	1.6063	0.169	0.054	0	EXN	GABRA5
0	0.974553	0.203	0.088	0	EXN	MGAT5B
0	0.853915	0.182	0.067	0	EXN	CHST1
0	1.52456	0.156	0.041	0	EXN	VWA3A
0	0.505268	0.215	0.101	0	EXN	LYRM4
0	1.08347	0.179	0.065	0	EXN	TMEM2
0	0.628929	0.209	0.095	0	EXN	FBXO33
0	1.07927	0.192	0.079	0	EXN	SMYD2
0	1.03958	0.209	0.096	0	EXN	SPTBN2
0	2.11092	0.141	0.028	0	EXN	TESC
0	0.890094	0.206	0.093	0	EXN	CHMP4B
0	0.564079	0.202	0.09	0	EXN	KIAA1671
0	0.916241	0.209	0.097	0	EXN	ERICH3
0	0.643393	0.187	0.076	0	EXN	SKIL
0	0.95297	0.185	0.074	0	EXN	RP11-545D19.1
0	0.757205	0.194	0.083	0	EXN	TMEM67
0	0.607808	0.205	0.094	0	EXN	NLN
0	1.01139	0.176	0.065	0	EXN	PPP1R14C
0	0.498527	0.202	0.092	0	EXN	TM7SF3
0	0.413635	0.2	0.09	0	EXN	ZFYVE21
0	1.7858	0.153	0.043	0	EXN	LINC01123
0	0.764503	0.189	0.079	0	EXN	CXXC5
0	1.06182	0.176	0.066	0	EXN	IFT57
0	0.925725	0.174	0.064	0	EXN	OPRM1
0	1.56247	0.151	0.041	0	EXN	B4GALNT3
0	1.09363	0.175	0.065	0	EXN	PIP4K2C
0	1.35869	0.164	0.055	0	EXN	C4orf50
0	1.28553	0.167	0.058	0	EXN	RP11-305F18.1
0	0.906921	0.182	0.073	0	EXN	AC018816.3
0	1.36952	0.159	0.05	0	EXN	GPR63
0	1.5225	0.147	0.038	0	EXN	IL12A-AS1
0	1.34459	0.174	0.065	0	EXN	SOHLH1
0	2.38094	0.132	0.024	0	EXN	TNNT2
0	0.603625	0.195	0.087	0	EXN	RP11-156P1.2
0	1.4797	0.153	0.045	0	EXN	RP11-673E1.1
0	1.06525	0.193	0.085	0	EXN	GMFB
0	1.93651	0.135	0.028	0	EXN	AC018359.1
0	1.64571	0.163	0.056	0	EXN	HS3ST2
0	0.918843	0.152	0.045	0	EXN	PCED1B
0	0.808605	0.184	0.077	0	EXN	RUNDC3A-AS1
0	0.845992	0.187	0.08	0	EXN	HIC2
0	1.91951	0.137	0.031	0	EXN	EGR3
0	0.920887	0.192	0.086	0	EXN	ANKRD24
0	1.7299	0.15	0.044	0	EXN	KCNA1
0	0.986647	0.16	0.055	0	EXN	PTH2R
0	1.11889	0.176	0.071	0	EXN	MATK
0	0.977448	0.168	0.064	0	EXN	PVT1
0	0.4112	0.152	0.048	0	EXN	SEC14L5
0	0.662065	0.157	0.054	0	EXN	ACTN2
0	0.807574	0.163	0.06	0	EXN	ARHGAP10
0	0.286698	0.153	0.05	0	EXN	AC005009.2
0	1.07336	0.163	0.061	0	EXN	PLEKHG5
0	2.00661	0.132	0.03	0	EXN	NPTX2
0	0.936767	0.174	0.072	0	EXN	TAF4B
0	2.52302	0.123	0.021	0	EXN	ONECUT2
0	0.939389	0.166	0.066	0	EXN	KLF9
0	1.2263	0.165	0.065	0	EXN	EGFL7
0	1.64206	0.134	0.034	0	EXN	RTN4R
0	1.17864	0.15	0.051	0	EXN	C2orf80
0	1.04648	0.147	0.048	0	EXN	FAM212B
0	0.994602	0.144	0.045	0	EXN	PTCHD1
0	2.2689	0.121	0.023	0	EXN	GRM2
0	0.917648	0.142	0.044	0	EXN	DPYD-AS1
0	0.846648	0.163	0.066	0	EXN	SPEF2
0	1.77455	0.134	0.037	0	EXN	RP11-368L12.1
0	0.883772	0.154	0.057	0	EXN	ZBTB46
0	0.934903	0.155	0.059	0	EXN	C16orf87
0	1.9298	0.117	0.022	0	EXN	PRDM8
0	1.88142	0.123	0.028	0	EXN	PRSS3
0	1.76645	0.128	0.033	0	EXN	CTC-459F4.5
0	1.18351	0.137	0.044	0	EXN	RP11-379B18.6
0	1.25925	0.131	0.038	0	EXN	RP4-555D20.2
0	0.893074	0.15	0.057	0	EXN	RSPH3
0	1.14657	0.149	0.056	0	EXN	C14orf132
0	1.19938	0.146	0.053	0	EXN	MIR7-3HG
0	0.586369	0.147	0.055	0	EXN	CCNYL1
0	1.71217	0.122	0.03	0	EXN	CTD-2023N9.3
0	1.18591	0.144	0.052	0	EXN	SPEF1
0	2.34753	0.108	0.017	0	EXN	TPBG
0	1.58859	0.121	0.03	0	EXN	LINC01435
0	0.952451	0.138	0.048	0	EXN	STARD4
0	1.21969	0.136	0.047	0	EXN	JAZF1-AS1
0	1.50991	0.132	0.043	0	EXN	MKX
0	1.48735	0.117	0.029	0	EXN	RP11-505E24.2
0	2.4386	0.11	0.022	0	EXN	TRIM54
0	1.38025	0.133	0.046	0	EXN	SSTR2
0	2.20834	0.105	0.018	0	EXN	RTN4RL2
0	1.41964	0.121	0.034	0	EXN	MYO5C
0	2.40133	0.107	0.02	0	EXN	RP11-78F17.1
0	2.05004	0.11	0.024	0	EXN	RP11-490G2.2
0	0.630409	0.12	0.034	0	EXN	RASAL1
0	0.920351	0.125	0.039	0	EXN	RP11-35G9.5
0	1.74209	0.116	0.031	0	EXN	SLC22A6
0	2.34677	0.101	0.017	0	EXN	RP11-197K6.1
0	2.18371	0.103	0.019	0	EXN	LYPD8
0	2.28355	0.103	0.02	0	EXN	GPX3
0	0.470937	0.873	0.791	0	EXN	ADGRB3
0	1.33351	0.108	0.028	0	EXN	ARC
0	1.43686	0.105	0.026	0	EXN	RP4-665J23.1
0	1.5156	0.109	0.03	0	EXN	KLHL34
0	1.84294	0.102	0.023	0	EXN	ART3
0	1.90941	0.103	0.024	0	EXN	PTPN3
0	2.15452	0.1	0.022	0	EXN	SLC22A24
2.39816e-307	0.573813	0.422	0.266	6.91606e-303	EXN	AKAP11
2.5574e-307	1.49999	0.107	0.03	7.37528e-303	EXN	C1orf95
1.41034e-306	0.754639	0.332	0.195	4.06729e-302	EXN	TMEM14A
4.1741e-306	0.381983	0.29	0.159	1.20377e-301	EXN	ADAM17
9.76983e-306	0.707522	0.228	0.113	2.81752e-301	EXN	MEF2D
1.8154e-305	0.639602	0.577	0.408	5.23544e-301	EXN	NGFRAP1
3.10852e-305	0.87894	0.243	0.125	8.96467e-301	EXN	ATP6V1E1
4.0388e-305	0.346059	0.328	0.186	1.16475e-300	EXN	BDP1
5.56608e-305	0.31838	0.454	0.287	1.6052e-300	EXN	TLK1
7.44331e-305	0.265458	0.343	0.198	2.14658e-300	EXN	NPIPA1
4.20814e-304	0.554683	0.289	0.159	1.21358e-299	EXN	PNCK
4.74125e-304	0.501757	0.375	0.225	1.36733e-299	EXN	RUNDC3B
7.63146e-304	1.029	0.122	0.04	2.20084e-299	EXN	GRB14
8.31328e-304	0.442936	0.278	0.149	2.39747e-299	EXN	NOS1AP
1.06881e-303	0.715632	0.252	0.131	3.08234e-299	EXN	PGP
4.11191e-303	0.888361	0.194	0.089	1.18583e-298	EXN	RP11-195F19.5
4.90661e-303	0.759373	0.113	0.034	1.41502e-298	EXN	PLXND1
7.78292e-303	0.350428	0.496	0.324	2.24452e-298	EXN	BMPR2
8.44432e-303	0.307568	0.316	0.177	2.43526e-298	EXN	COG6
1.66133e-302	0.437772	0.266	0.14	4.7911e-298	EXN	DYNC2LI1
1.92839e-302	0.700078	0.197	0.09	5.56128e-298	EXN	CAMK1
1.94535e-302	0.672518	0.236	0.119	5.61018e-298	EXN	FSD1
8.0856e-302	0.258961	0.502	0.324	2.33181e-297	EXN	FRY
8.52101e-302	0.608199	0.234	0.117	2.45737e-297	EXN	RP1-111C20.4
2.48392e-301	0.680464	0.499	0.337	7.16339e-297	EXN	ATP1A1
2.51681e-301	0.330672	0.21	0.099	7.25822e-297	EXN	CCDC102B
9.71077e-301	0.788904	0.174	0.075	2.80049e-296	EXN	CORO1A
1.87049e-300	0.961968	0.218	0.108	5.39431e-296	EXN	UHMK1
2.10959e-300	0.715049	0.353	0.212	6.08384e-296	EXN	PTPRN
6.93567e-300	0.283202	0.361	0.212	2.00018e-295	EXN	SMAP1
1.28474e-299	0.780439	0.208	0.099	3.70507e-295	EXN	MBOAT7
1.43343e-299	1.40037	0.108	0.032	4.13388e-295	EXN	AC068490.2
1.66491e-299	0.627006	0.3	0.168	4.80144e-295	EXN	GNB5
2.78447e-299	0.986095	0.13	0.045	8.03015e-295	EXN	SEMA5B
5.01569e-299	0.318909	0.256	0.132	1.44648e-294	EXN	FAM188A
1.01523e-298	0.471129	0.261	0.138	2.92783e-294	EXN	LINC00937
2.15539e-298	0.591893	0.172	0.074	6.21594e-294	EXN	STYXL1
4.24618e-298	1.28902	0.114	0.035	1.22456e-293	EXN	RP11-886D15.1
6.26278e-298	0.49068	0.435	0.274	1.80612e-293	EXN	SRRM3
6.92174e-297	0.697203	0.226	0.113	1.99616e-292	EXN	NAPA
1.08699e-296	1.19115	0.105	0.03	3.13478e-292	EXN	CACNA2D3-AS1
1.5951e-296	0.48443	0.22	0.107	4.60011e-292	EXN	C1orf52
1.6193e-296	0.48446	0.618	0.449	4.66991e-292	EXN	ACTB
2.62819e-296	1.36689	0.104	0.029	7.57945e-292	EXN	MYOM2
2.71946e-296	0.434344	0.477	0.314	7.84264e-292	EXN	DOK6
2.84726e-296	0.686311	0.131	0.046	8.21123e-292	EXN	ELK4
3.79599e-296	1.02569	0.14	0.052	1.09473e-291	EXN	RP1-90G24.10
3.59327e-295	0.503034	0.284	0.156	1.03626e-290	EXN	CCSAP
1.21384e-294	1.05649	0.145	0.056	3.50059e-290	EXN	AC007740.1
2.01327e-294	0.293702	0.272	0.145	5.80607e-290	EXN	MAPK14
5.37291e-294	0.83048	0.3	0.173	1.54949e-289	EXN	VDAC1
2.91779e-293	0.714193	0.221	0.11	8.41461e-289	EXN	FAM213A
3.64997e-293	0.612572	0.273	0.15	1.05261e-288	EXN	MYEOV2
4.00849e-293	1.09235	0.157	0.064	1.15601e-288	EXN	KBTBD11
8.1466e-293	0.357946	0.283	0.154	2.3494e-288	EXN	DDX10
3.61267e-292	0.804588	0.256	0.136	1.04186e-287	EXN	RFPL1S
7.45168e-292	0.812998	0.167	0.07	2.14899e-287	EXN	LINC01197
9.15143e-292	1.2379	0.128	0.045	2.63918e-287	EXN	SGPP2
1.6082e-291	1.17016	0.122	0.041	4.63788e-287	EXN	LZTFL1
4.82919e-291	0.557929	0.126	0.043	1.39269e-286	EXN	ADORA1
2.2544e-290	0.662557	0.24	0.124	6.50146e-286	EXN	TRPM2
2.63816e-290	0.734983	0.156	0.064	7.60819e-286	EXN	ANKRD27
9.54285e-290	0.444352	0.272	0.147	2.75206e-285	EXN	ADCY9
4.3505e-289	0.836684	0.214	0.105	1.25464e-284	EXN	JPH3
2.35407e-288	0.591246	0.291	0.163	6.78891e-284	EXN	BCAP29
3.78936e-288	0.675436	0.277	0.153	1.09281e-283	EXN	ATP6V1C1
8.46385e-288	0.561936	0.257	0.137	2.44089e-283	EXN	RANGAP1
1.07495e-287	0.399765	0.349	0.207	3.10006e-283	EXN	ADGRL1
4.84103e-287	1.19878	0.153	0.063	1.39611e-282	EXN	EPHX4
4.95538e-287	0.317907	0.241	0.124	1.42908e-282	EXN	PALM
5.21468e-287	0.952627	0.101	0.029	1.50386e-282	EXN	STAT6
9.37336e-287	1.52398	0.103	0.03	2.70318e-282	EXN	FKBP1B
1.564e-286	1.09543	0.2	0.097	4.51042e-282	EXN	CTA-373H7.7
2.9466e-286	0.792058	0.246	0.13	8.49769e-282	EXN	NEURL1
6.33664e-286	0.554578	0.24	0.124	1.82742e-281	EXN	ITGB1BP1
1.43078e-285	0.318368	0.338	0.196	4.12623e-281	EXN	ODF2L
2.30109e-285	0.747671	0.207	0.101	6.63613e-281	EXN	TMEM38A
3.83586e-285	0.535363	0.363	0.22	1.10622e-280	EXN	LPCAT4
8.82651e-285	0.474498	0.336	0.198	2.54548e-280	EXN	ATP1B3
1.49643e-284	0.349256	0.235	0.12	4.31556e-280	EXN	SMAP2
2.2486e-284	0.411193	0.48	0.316	6.48475e-280	EXN	CLTC
2.99124e-284	0.596608	0.266	0.145	8.62644e-280	EXN	FHL1
7.03101e-284	0.501775	0.514	0.343	2.02767e-279	EXN	GABRA1
8.69655e-284	0.895025	0.149	0.06	2.508e-279	EXN	NUMBL
1.53451e-283	0.353396	0.447	0.29	4.42538e-279	EXN	MEG8
2.87137e-283	0.373213	0.406	0.252	8.28073e-279	EXN	GALNT11
3.31361e-282	0.309751	0.254	0.134	9.55613e-278	EXN	ATXN7
3.57956e-282	0.360248	0.31	0.178	1.03231e-277	EXN	ULK3
3.68367e-282	0.357271	0.129	0.046	1.06233e-277	EXN	FXYD1
2.09848e-281	0.761671	0.352	0.216	6.05181e-277	EXN	RNF11
3.16379e-281	0.624881	0.222	0.112	9.12406e-277	EXN	PPP4R4
1.01957e-280	0.769119	0.39	0.25	2.94035e-276	EXN	UQCRH
1.0791e-280	0.408912	0.392	0.244	3.11202e-276	EXN	RAB2A
1.53883e-280	0.532776	0.36	0.219	4.43783e-276	EXN	TRIM37
1.81217e-280	0.768107	0.168	0.073	5.22611e-276	EXN	ARNTL
5.79467e-280	0.956202	0.141	0.055	1.67113e-275	EXN	GLB1L3
7.31869e-280	0.259478	0.409	0.254	2.11064e-275	EXN	RPRD1A
8.61066e-280	1.18138	0.116	0.039	2.48323e-275	EXN	ZNF831
9.84372e-280	0.58749	0.243	0.128	2.83883e-275	EXN	IPO5
1.21396e-279	0.308279	0.355	0.212	3.50094e-275	EXN	HTT
2.04466e-279	0.57455	0.223	0.113	5.89659e-275	EXN	SH3BP5
8.4929e-279	0.980009	0.147	0.059	2.44927e-274	EXN	PDZD7
1.05636e-278	0.859391	0.144	0.057	3.04642e-274	EXN	APOL2
2.58997e-278	0.626152	0.298	0.17	7.46921e-274	EXN	SVOP
2.94453e-278	0.478225	0.223	0.114	8.49174e-274	EXN	TUBB4A
4.44848e-278	0.263889	0.271	0.147	1.2829e-273	EXN	HIVEP1
1.06568e-277	1.11774	0.161	0.07	3.07331e-273	EXN	LGALS1
2.27002e-277	0.520469	0.24	0.125	6.5465e-273	EXN	NMT2
2.36126e-277	1.19195	0.14	0.055	6.80965e-273	EXN	RP4-678D15.1
2.40226e-277	0.791246	0.266	0.147	6.92787e-273	EXN	CPLX2
9.03799e-277	0.44355	0.351	0.21	2.60647e-272	EXN	NEK10
1.07635e-276	0.854562	0.222	0.114	3.10408e-272	EXN	SGTB
1.35737e-276	0.298288	0.309	0.177	3.91452e-272	EXN	ACVR2A
5.45257e-276	0.59675	0.25	0.133	1.57247e-271	EXN	SMS
7.31101e-276	0.258104	0.352	0.21	2.10842e-271	EXN	SND1
1.34328e-275	0.325715	0.448	0.286	3.87388e-271	EXN	STAU2
1.88457e-275	0.429184	0.247	0.131	5.4349e-271	EXN	OGFR
4.65896e-275	0.539484	0.234	0.122	1.3436e-270	EXN	NAPG
8.37193e-275	0.343238	0.317	0.184	2.41438e-270	EXN	CDK10
8.40336e-275	0.34849	0.429	0.272	2.42344e-270	EXN	FAM126B
1.21247e-274	1.15763	0.109	0.035	3.49664e-270	EXN	LRRIQ1
5.8879e-274	1.24112	0.103	0.031	1.69801e-269	EXN	RND1
6.42131e-274	0.793708	0.225	0.116	1.85184e-269	EXN	TCEB1
6.72734e-274	0.309235	0.334	0.197	1.9401e-269	EXN	PLEC
8.42491e-274	0.628466	0.24	0.126	2.42966e-269	EXN	HMGCLL1
2.35733e-273	0.580902	0.19	0.09	6.7983e-269	EXN	GPR180
2.78689e-273	0.812072	0.251	0.137	8.0371e-269	EXN	UBE2V2
6.81528e-273	0.7399	0.121	0.042	1.96546e-268	EXN	KCNK10
7.03106e-273	0.408882	0.22	0.112	2.02769e-268	EXN	OR2L13
1.459e-272	0.709598	0.137	0.053	4.2076e-268	EXN	STX2
1.94762e-272	1.01045	0.146	0.06	5.61673e-268	EXN	PDE1B
3.19913e-272	0.250742	0.415	0.261	9.22596e-268	EXN	UBE2K
3.82865e-272	0.678205	0.181	0.083	1.10415e-267	EXN	DOPEY2
6.90579e-272	0.438861	0.292	0.166	1.99156e-267	EXN	FAM65A
1.43609e-271	0.955628	0.224	0.117	4.14154e-267	EXN	CX3CL1
2.23937e-271	0.392228	0.27	0.149	6.45812e-267	EXN	UHRF1BP1L
6.31951e-271	0.52362	0.456	0.306	1.82248e-266	EXN	KLC1
9.10499e-271	0.467799	0.201	0.098	2.62579e-266	EXN	BANP
3.28004e-270	0.296661	0.228	0.116	9.45931e-266	EXN	PAQR3
3.63848e-270	0.536063	0.22	0.112	1.0493e-265	EXN	LRRN3
8.34142e-270	1.00289	0.126	0.046	2.40558e-265	EXN	CCBE1
2.62305e-269	1.02813	0.107	0.034	7.5646e-265	EXN	TTC6
4.15039e-269	0.619178	0.217	0.111	1.19693e-264	EXN	IAH1
4.62897e-269	1.01202	0.17	0.077	1.33495e-264	EXN	DUSP3
6.95822e-269	0.68108	0.112	0.037	2.00668e-264	EXN	RP11-739G5.1
6.98391e-269	0.64685	0.193	0.092	2.01409e-264	EXN	TBPL1
8.35223e-269	0.637993	0.273	0.154	2.4087e-264	EXN	VPS35
1.13018e-267	0.266004	0.185	0.086	3.25933e-263	EXN	RSU1
1.43045e-267	0.648388	0.206	0.102	4.12528e-263	EXN	NME5
2.66467e-267	1.15658	0.13	0.05	7.68464e-263	EXN	TSPAN17
6.94667e-267	0.282666	0.448	0.291	2.00335e-262	EXN	NOL4
8.08945e-267	0.951224	0.238	0.129	2.33292e-262	EXN	TUBB
9.70121e-267	0.553282	0.263	0.146	2.79773e-262	EXN	TPT1
9.72061e-267	0.653186	0.214	0.108	2.80333e-262	EXN	LRRC6
2.71117e-265	0.498142	0.188	0.089	7.81874e-261	EXN	HABP4
6.75129e-265	0.492749	0.258	0.14	1.94701e-260	EXN	GNG2
1.15231e-264	0.564782	0.206	0.102	3.32316e-260	EXN	CBWD7
1.81999e-264	0.638303	0.177	0.082	5.24867e-260	EXN	RARRES1
1.84207e-264	0.401676	0.303	0.176	5.31234e-260	EXN	GRM8
2.94346e-264	0.9926	0.116	0.041	8.48865e-260	EXN	KCNN1
3.15436e-264	0.498361	0.211	0.106	9.09685e-260	EXN	MFSD10
2.51209e-263	0.671707	0.182	0.086	7.24461e-259	EXN	SEPT9
5.33883e-263	0.371033	0.216	0.11	1.53967e-258	EXN	PLEKHM3
1.36632e-262	0.988345	0.191	0.093	3.94034e-258	EXN	SLC25A22
1.37848e-262	0.78509	0.137	0.055	3.9754e-258	EXN	RP11-770G2.2
2.01276e-262	0.900197	0.169	0.077	5.80459e-258	EXN	RP11-624L4.1
6.51954e-262	0.448428	0.536	0.372	1.88017e-257	EXN	ATP2A2
1.05101e-261	0.92471	0.16	0.071	3.031e-257	EXN	WIPF3
4.49477e-261	0.617904	0.364	0.229	1.29625e-256	EXN	NPTXR
4.8401e-261	1.11308	0.115	0.041	1.39584e-256	EXN	MRAP2
5.41062e-261	0.529002	0.26	0.144	1.56037e-256	EXN	AC159540.1
8.40946e-261	0.493718	0.375	0.234	2.4252e-256	EXN	CACNG8
9.67537e-261	0.681565	0.382	0.245	2.79028e-256	EXN	CEND1
1.70457e-260	0.258361	0.346	0.209	4.9158e-256	EXN	BRINP2
1.94588e-260	0.919037	0.161	0.072	5.61173e-256	EXN	NT5DC3
4.28566e-260	0.641707	0.178	0.084	1.23594e-255	EXN	RNF112
5.0014e-260	1.52628	0.108	0.036	1.44235e-255	EXN	PHLDB2
6.84015e-260	0.692363	0.174	0.081	1.97263e-255	EXN	RP11-304M2.3
1.75857e-259	0.726572	0.275	0.156	5.07154e-255	EXN	KIAA0513
3.45869e-259	0.537478	0.251	0.138	9.97451e-255	EXN	HMGCS1
4.84327e-259	0.39255	0.236	0.125	1.39675e-254	EXN	SPATA7
6.86958e-259	1.05956	0.143	0.06	1.98112e-254	EXN	CFAP46
1.25844e-258	0.307219	0.196	0.095	3.62921e-254	EXN	CDKL1
1.26008e-258	0.421427	0.42	0.278	3.63394e-254	EXN	RPL34
1.35973e-258	0.652383	0.15	0.064	3.92132e-254	EXN	USP28
2.55342e-258	0.842804	0.187	0.091	7.3638e-254	EXN	DRP2
3.26642e-258	0.870264	0.28	0.164	9.42003e-254	EXN	NAP1L2
4.96853e-258	0.540056	0.253	0.138	1.43287e-253	EXN	PITPNM2
1.85566e-257	0.480781	0.466	0.315	5.35155e-253	EXN	MORF4L1
2.33173e-257	1.12738	0.109	0.037	6.72448e-253	EXN	TLL1
2.59444e-257	0.549131	0.256	0.142	7.48212e-253	EXN	AZIN1
3.66067e-257	0.927016	0.257	0.145	1.0557e-252	EXN	SYT13
4.48926e-257	0.596241	0.296	0.174	1.29466e-252	EXN	PTPN5
4.833e-257	0.508165	0.233	0.124	1.39379e-252	EXN	ABCC8
1.20794e-256	0.586656	0.262	0.147	3.48358e-252	EXN	SUMO1
3.41283e-256	0.699943	0.152	0.066	9.84226e-252	EXN	BEGAIN
4.05005e-256	0.45958	0.266	0.149	1.16799e-251	EXN	CCDC92
5.86256e-256	0.316477	0.258	0.142	1.6907e-251	EXN	NELFA
5.0604e-255	1.00455	0.118	0.043	1.45937e-250	EXN	LINC01183
5.41925e-255	0.99284	0.243	0.135	1.56286e-250	EXN	LDHA
6.637e-255	0.653818	0.22	0.115	1.91404e-250	EXN	CNRIP1
6.9199e-255	0.547833	0.325	0.197	1.99563e-250	EXN	NUDT3
7.63989e-255	1.00371	0.133	0.053	2.20327e-250	EXN	ANXA11
1.99036e-254	0.718346	0.178	0.085	5.74001e-250	EXN	STK32C
2.77232e-254	0.684814	0.139	0.057	7.99508e-250	EXN	RAD18
6.22089e-254	0.977216	0.118	0.043	1.79404e-249	EXN	NUDT14
1.20933e-253	0.355314	0.375	0.234	3.48757e-249	EXN	FBXO44
1.21424e-253	1.0344	0.132	0.052	3.50175e-249	EXN	GLIS1
2.6789e-253	0.455749	0.215	0.111	7.72569e-249	EXN	NOL7
3.85121e-253	0.657249	0.176	0.083	1.11065e-248	EXN	PPP1R7
5.40153e-253	1.18893	0.116	0.042	1.55775e-248	EXN	DDN
7.06391e-253	0.30919	0.389	0.244	2.03716e-248	EXN	MARK1
1.20862e-252	1.05511	0.111	0.038	3.48555e-248	EXN	RASD1
1.59502e-252	0.514931	0.313	0.186	4.59987e-248	EXN	KCNJ6
1.67517e-252	0.638907	0.335	0.208	4.83103e-248	EXN	SLC9A6
4.30466e-252	0.543799	0.213	0.11	1.24142e-247	EXN	MFSD6
5.04714e-252	0.525862	0.154	0.067	1.45554e-247	EXN	NAB1
8.48898e-252	0.640473	0.239	0.131	2.44814e-247	EXN	DYNLRB1
2.01839e-251	0.595251	0.284	0.166	5.82082e-247	EXN	ZMAT3
2.21652e-251	0.532339	0.198	0.099	6.39222e-247	EXN	C18orf25
2.72879e-251	0.369764	0.293	0.171	7.86956e-247	EXN	KNDC1
3.81647e-251	0.378243	0.358	0.221	1.10063e-246	EXN	IQSEC1
5.44036e-251	0.288153	0.282	0.161	1.56894e-246	EXN	FILIP1L
5.84713e-251	0.500161	0.155	0.068	1.68625e-246	EXN	ARPC5
6.64953e-251	0.326147	0.353	0.217	1.91766e-246	EXN	ZER1
7.50354e-251	0.688727	0.149	0.064	2.16395e-246	EXN	RP11-133F8.2
8.37881e-251	0.407976	0.214	0.111	2.41637e-246	EXN	CENPT
1.11483e-250	1.31191	0.103	0.034	3.21505e-246	EXN	KIAA2012
5.14293e-250	0.589516	0.504	0.356	1.48317e-245	EXN	PEBP1
8.3873e-250	0.555441	0.214	0.111	2.41881e-245	EXN	ZNF519
9.55327e-250	0.455357	0.11	0.038	2.75507e-245	EXN	CEBPD
1.61443e-249	0.687526	0.266	0.153	4.65584e-245	EXN	MAPK8IP2
5.21257e-249	0.651392	0.346	0.216	1.50325e-244	EXN	SLC6A17
5.81178e-249	0.726695	0.164	0.075	1.67606e-244	EXN	LINC00970
8.59807e-249	0.99884	0.104	0.034	2.4796e-244	EXN	DCBLD1
1.23703e-248	0.281327	0.357	0.22	3.56747e-244	EXN	ESYT2
1.56077e-248	0.897685	0.292	0.177	4.50111e-244	EXN	EEF1A2
2.51909e-248	0.615178	0.139	0.058	7.26479e-244	EXN	DCDC1
7.18155e-248	0.555266	0.495	0.343	2.07109e-243	EXN	PKM
7.37321e-248	0.26597	0.361	0.223	2.12636e-243	EXN	OPA1
1.1823e-247	0.371307	0.287	0.168	3.40962e-243	EXN	PILRB
2.70515e-247	0.32466	0.393	0.251	7.80139e-243	EXN	SOD2
5.46999e-247	0.629097	0.311	0.188	1.57749e-242	EXN	CBX6
2.86107e-246	1.28905	0.101	0.033	8.25104e-242	EXN	SPTSSB
3.86166e-246	0.427317	0.281	0.162	1.11367e-241	EXN	AP3B2
5.66801e-246	0.404051	0.289	0.169	1.6346e-241	EXN	CNOT7
3.94312e-245	0.518685	0.19	0.094	1.13716e-240	EXN	RP11-712B9.2
6.37947e-245	0.406325	0.402	0.258	1.83978e-240	EXN	KCNT1
1.17109e-244	0.259289	0.704	0.504	3.37731e-240	EXN	GRIN2B
1.208e-244	0.377288	0.315	0.19	3.48374e-240	EXN	JUND
6.11781e-244	0.347576	0.217	0.113	1.76432e-239	EXN	HACD2
6.2276e-244	0.68663	0.264	0.152	1.79598e-239	EXN	TMEM160
3.00638e-243	0.379868	0.271	0.155	8.67011e-239	EXN	RAD9A
7.39845e-243	0.732985	0.148	0.065	2.13364e-238	EXN	RP13-726E6.2
9.66104e-243	0.370227	0.25	0.139	2.78615e-238	EXN	UPP2
1.73863e-242	1.07762	0.145	0.063	5.01403e-238	EXN	CDKN2D
2.65097e-242	0.366272	0.359	0.224	7.64514e-238	EXN	ICA1
3.3957e-242	0.344313	0.381	0.241	9.79285e-238	EXN	C16orf45
4.08351e-242	0.606935	0.268	0.154	1.17764e-237	EXN	MAPK9
5.08834e-242	0.36145	0.253	0.141	1.46743e-237	EXN	RAD23B
5.25808e-242	0.672141	0.26	0.15	1.51638e-237	EXN	FAM127A
5.78343e-242	0.677454	0.189	0.094	1.66788e-237	EXN	DPF1
1.75114e-241	0.447798	0.358	0.224	5.05011e-237	EXN	MAST1
4.50851e-241	0.488348	0.247	0.139	1.30021e-236	EXN	MLXIPL
4.84407e-241	0.659489	0.12	0.046	1.39698e-236	EXN	ZBTB7C
5.83626e-241	0.492347	0.258	0.148	1.68312e-236	EXN	RPL38
8.70427e-241	0.286378	0.319	0.191	2.51022e-236	EXN	RNF145
9.81226e-241	0.704157	0.118	0.045	2.82976e-236	EXN	RP11-121G22.3
1.03052e-240	0.452106	0.21	0.11	2.97193e-236	EXN	OXNAD1
1.22422e-240	0.443391	0.192	0.096	3.53053e-236	EXN	RP11-650J17.1
1.70694e-240	1.02804	0.2	0.104	4.92264e-236	EXN	DYNLT3
1.96645e-240	0.43941	0.332	0.203	5.67105e-236	EXN	CCDC64
2.3834e-240	0.624333	0.183	0.09	6.87348e-236	EXN	TXNL4A
2.53186e-240	0.862214	0.201	0.105	7.30164e-236	EXN	AP2S1
2.91983e-240	1.0176	0.13	0.053	8.42048e-236	EXN	SYCE1
4.82291e-240	0.472703	0.134	0.055	1.39088e-235	EXN	CFAP44
1.52299e-239	0.685693	0.161	0.074	4.39215e-235	EXN	ANKMY2
2.37124e-239	0.918592	0.193	0.099	6.83843e-235	EXN	TUBB4B
2.78426e-239	0.437721	0.223	0.119	8.02953e-235	EXN	ARPC2
3.13622e-239	1.08041	0.102	0.035	9.04454e-235	EXN	LINC01476
3.37968e-239	1.10841	0.113	0.042	9.74665e-235	EXN	LINC00626
4.04226e-239	0.591299	0.165	0.077	1.16575e-234	EXN	PRSS23
4.74659e-239	0.380319	0.406	0.263	1.36887e-234	EXN	GNB1
1.0689e-238	0.537721	0.211	0.111	3.0826e-234	EXN	PIGQ
1.53615e-238	0.431484	0.213	0.111	4.4301e-234	EXN	MED31
1.7402e-238	0.78258	0.158	0.072	5.01855e-234	EXN	DLGAP3
4.97216e-238	0.481121	0.385	0.25	1.43392e-233	EXN	PRKAR1A
5.7021e-238	0.763486	0.164	0.077	1.64443e-233	EXN	EPHA10
7.78088e-238	0.431661	0.32	0.194	2.24393e-233	EXN	NQO2
1.41738e-237	0.318185	0.401	0.254	4.08757e-233	EXN	RPH3A
1.64445e-237	0.524375	0.269	0.156	4.74242e-233	EXN	PRKCZ
2.01624e-237	0.461839	0.22	0.118	5.81463e-233	EXN	ARL6
2.10736e-237	0.589981	0.204	0.106	6.07741e-233	EXN	MS4A13
5.26378e-237	0.767881	0.256	0.147	1.51802e-232	EXN	STX1B
8.97778e-237	0.963218	0.154	0.071	2.5891e-232	EXN	TPRG1L
1.13207e-236	0.914903	0.148	0.066	3.26478e-232	EXN	CACNA1I
1.93789e-236	0.530808	0.125	0.05	5.58869e-232	EXN	SPICE1
3.06227e-236	0.366414	0.21	0.111	8.83128e-232	EXN	RPS20
6.05529e-236	0.923802	0.199	0.104	1.74629e-231	EXN	HPCAL4
6.63735e-236	0.486864	0.158	0.072	1.91414e-231	EXN	C5orf30
6.86309e-236	0.894635	0.169	0.081	1.97925e-231	EXN	PRKAG2-AS1
7.43379e-236	0.948523	0.112	0.042	2.14383e-231	EXN	FTCD
1.03816e-235	0.354596	0.274	0.16	2.99396e-231	EXN	BRSK1
1.88755e-235	0.70376	0.167	0.079	5.4435e-231	EXN	GBA
2.50247e-235	0.319592	0.209	0.109	7.21686e-231	EXN	MSMO1
1.30694e-234	0.52177	0.236	0.13	3.76908e-230	EXN	RPS6KA6
1.62021e-234	0.739723	0.242	0.136	4.67253e-230	EXN	SEPT3
9.11947e-234	0.563043	0.225	0.123	2.62996e-229	EXN	MAN1C1
1.07218e-233	0.346469	0.132	0.054	3.09206e-229	EXN	RHBDL3
2.07299e-233	0.632339	0.163	0.076	5.97828e-229	EXN	CACNB1
9.66812e-233	0.636552	0.266	0.155	2.78819e-228	EXN	ACOT7
1.55355e-232	0.343211	0.297	0.178	4.48028e-228	EXN	SBNO1
1.67353e-232	0.315979	0.248	0.139	4.8263e-228	EXN	USP14
1.80992e-232	0.4767	0.2	0.103	5.21962e-228	EXN	PTPRB
2.60258e-232	0.70782	0.178	0.088	7.50559e-228	EXN	CHP1
8.96654e-232	0.587496	0.186	0.093	2.58586e-227	EXN	CDON
2.06783e-231	0.67322	0.286	0.172	5.96341e-227	EXN	ARF1
2.10692e-231	0.56426	0.269	0.157	6.07614e-227	EXN	HK1
2.65527e-231	0.516192	0.171	0.083	7.65754e-227	EXN	LINC00276
3.10174e-231	0.273248	0.295	0.175	8.9451e-227	EXN	MIPOL1
1.08518e-230	0.540036	0.172	0.084	3.12956e-226	EXN	PDCD10
1.11344e-230	0.896115	0.158	0.075	3.21104e-226	EXN	BAD
1.23538e-230	0.425257	0.271	0.158	3.56271e-226	EXN	PDPK1
2.9646e-230	0.989462	0.119	0.047	8.54961e-226	EXN	CFAP61
3.43794e-230	0.782607	0.19	0.097	9.91469e-226	EXN	USP46
4.29838e-230	0.417527	0.192	0.098	1.23961e-225	EXN	RP11-486O13.4
5.523e-230	0.413335	0.302	0.183	1.59278e-225	EXN	AP2A2
6.84387e-230	0.41363	0.236	0.131	1.9737e-225	EXN	TUBG2
1.96922e-229	0.621075	0.148	0.067	5.67902e-225	EXN	SLC36A1
2.08648e-229	0.454552	0.165	0.079	6.01719e-225	EXN	IFT122
2.39438e-229	0.978591	0.188	0.097	6.90516e-225	EXN	KCNJ4
4.5785e-229	0.40439	0.32	0.197	1.32039e-224	EXN	RP11-405A12.2
6.03535e-229	0.819939	0.162	0.078	1.74054e-224	EXN	CAPNS1
1.16468e-228	0.646597	0.327	0.206	3.35883e-224	EXN	CADM3
1.2325e-228	0.355287	0.186	0.094	3.55442e-224	EXN	ZCCHC2
1.60235e-228	0.306708	0.512	0.357	4.62102e-224	EXN	NUCKS1
2.4708e-228	0.63932	0.252	0.145	7.12553e-224	EXN	ATP6V1D
1.25731e-227	0.43948	0.108	0.039	3.62595e-223	EXN	LHX2
1.87228e-227	0.680486	0.153	0.07	5.39948e-223	EXN	BZW2
2.59779e-227	0.338272	0.251	0.143	7.49176e-223	EXN	PANK3
4.64829e-227	0.733441	0.19	0.098	1.34052e-222	EXN	CEP170B
7.98091e-227	1.28179	0.104	0.037	2.30162e-222	EXN	CHMP3
9.38274e-227	0.836882	0.126	0.052	2.70589e-222	EXN	OCA2
2.62745e-226	0.688539	0.173	0.085	7.5773e-222	EXN	MEST
8.93854e-226	0.436742	0.259	0.149	2.57779e-221	EXN	CTD-2277K2.1
1.12809e-225	0.712298	0.131	0.055	3.25329e-221	EXN	KLF6
1.18968e-225	0.602045	0.382	0.252	3.43092e-221	EXN	SCG5
1.51461e-225	0.375457	0.208	0.11	4.368e-221	EXN	CTC-575N7.1
2.28091e-224	0.61631	0.352	0.228	6.57792e-220	EXN	BEX4
7.51014e-224	0.902933	0.129	0.054	2.16585e-219	EXN	GSKIP
9.17722e-224	0.324547	0.26	0.15	2.64662e-219	EXN	SHOC2
1.32279e-223	0.410946	0.158	0.074	3.81481e-219	EXN	FIG4
1.72757e-223	0.849949	0.112	0.043	4.98213e-219	EXN	SNAI3
2.15229e-223	0.376073	0.158	0.074	6.207e-219	EXN	EML1
2.8713e-223	0.279226	0.237	0.132	8.28055e-219	EXN	KIAA1841
3.20995e-223	0.592758	0.115	0.045	9.25716e-219	EXN	PLEKHA2
5.31193e-223	0.438849	0.24	0.135	1.53191e-218	EXN	SUSD4
5.65792e-223	0.941223	0.118	0.047	1.63169e-218	EXN	NAB2
6.82406e-223	0.819117	0.233	0.132	1.96799e-218	EXN	ARHGDIG
7.95757e-223	0.860772	0.146	0.067	2.29488e-218	EXN	SLC2A6
9.60024e-223	0.256454	0.355	0.223	2.76861e-218	EXN	KDM5B
3.17309e-222	0.83344	0.162	0.078	9.15087e-218	EXN	ZMAT2
4.47736e-222	0.421403	0.304	0.187	1.29123e-217	EXN	BSG
4.9413e-222	0.269954	0.264	0.153	1.42502e-217	EXN	UBP1
7.22806e-222	0.777355	0.143	0.065	2.0845e-217	EXN	EME2
8.4782e-222	1.12036	0.106	0.04	2.44503e-217	EXN	SH2D5
2.14852e-221	0.58685	0.177	0.089	6.19612e-217	EXN	ARHGDIA
4.19646e-221	0.923171	0.133	0.058	1.21022e-216	EXN	EHD3
6.28971e-221	0.392397	0.427	0.285	1.81389e-216	EXN	ZNF483
6.83865e-221	0.71174	0.332	0.213	1.9722e-216	EXN	PGAM1
7.85922e-221	0.42701	0.244	0.139	2.26652e-216	EXN	FKBP3
8.3245e-221	0.9596	0.108	0.041	2.4007e-216	EXN	SEC16B
2.78423e-220	0.789015	0.205	0.111	8.02944e-216	EXN	PINK1
3.48502e-220	0.391768	0.183	0.093	1.00505e-215	EXN	STK38L
5.61178e-220	0.862216	0.144	0.065	1.61838e-215	EXN	CYP4X1
6.57988e-220	0.711555	0.156	0.074	1.89757e-215	EXN	CCDC25
1.37425e-219	0.364364	0.207	0.111	3.9632e-215	EXN	VCL
3.69837e-219	0.500111	0.267	0.157	1.06657e-214	EXN	CCDC144NL-AS1
1.18564e-218	0.686696	0.181	0.092	3.41927e-214	EXN	ACVR1B
2.54227e-218	0.505622	0.221	0.123	7.33166e-214	EXN	ACTR1B
3.19173e-218	0.737775	0.158	0.076	9.20463e-214	EXN	JAG2
1.43502e-217	0.599856	0.222	0.124	4.13846e-213	EXN	PEA15
2.80801e-217	0.618113	0.18	0.092	8.09803e-213	EXN	DENND6B
4.03286e-217	0.257582	0.232	0.129	1.16304e-212	EXN	CYB5B
7.31423e-217	0.927541	0.197	0.106	2.10935e-212	EXN	EPDR1
1.00948e-216	0.321376	0.479	0.329	2.91125e-212	EXN	DYNC1H1
1.51428e-216	0.379241	0.349	0.221	4.36702e-212	EXN	PRKAA2
6.2626e-216	0.571271	0.183	0.094	1.80607e-211	EXN	ZNF667-AS1
1.11975e-215	1.02871	0.132	0.058	3.22925e-211	EXN	RP11-379H8.1
1.39162e-215	0.276871	0.446	0.303	4.01328e-211	EXN	RCAN2
1.80651e-215	0.690904	0.224	0.126	5.20978e-211	EXN	FEM1B
2.79368e-215	0.570233	0.371	0.243	8.0567e-211	EXN	MDH1
2.85499e-215	0.442578	0.261	0.155	8.23351e-211	EXN	MEAF6
3.09521e-215	0.305224	0.223	0.123	8.92629e-211	EXN	RP11-295K2.3
3.36152e-215	0.406026	0.383	0.253	9.69429e-211	EXN	TMA7
3.47687e-215	0.566247	0.171	0.085	1.00269e-210	EXN	DIAPH1
4.96982e-215	0.621443	0.188	0.098	1.43325e-210	EXN	RP11-286N3.2
5.53538e-215	0.427473	0.312	0.195	1.59635e-210	EXN	SET
5.92273e-215	0.644552	0.157	0.076	1.70806e-210	EXN	CCDC28A
2.02048e-214	0.61556	0.343	0.222	5.82688e-210	EXN	TMEM130
2.48305e-214	0.614183	0.141	0.064	7.16088e-210	EXN	MED21
4.57448e-214	0.394327	0.249	0.145	1.31923e-209	EXN	PPDPF
1.96395e-213	0.675875	0.107	0.041	5.66385e-209	EXN	NR4A1
3.22682e-213	0.596017	0.164	0.081	9.30583e-209	EXN	MED10
6.74082e-213	0.323388	0.277	0.165	1.94399e-208	EXN	TCEA2
1.08747e-212	0.477625	0.298	0.182	3.13616e-208	EXN	REEP1
1.68472e-212	0.331961	0.42	0.28	4.85855e-208	EXN	CORO6
2.66708e-212	0.56794	0.139	0.063	7.6916e-208	EXN	CCDC24
3.01496e-212	0.746394	0.117	0.048	8.69485e-208	EXN	RP11-708B6.2
4.42322e-212	0.27893	0.167	0.082	1.27561e-207	EXN	ZNF264
6.81088e-212	0.558343	0.16	0.077	1.96419e-207	EXN	AC013463.2
1.72242e-211	0.278109	0.686	0.537	4.9673e-207	EXN	FTH1
2.4191e-211	0.294881	0.199	0.106	6.97643e-207	EXN	SAMD8
7.27782e-211	0.41669	0.327	0.211	2.09885e-206	EXN	RPS27A
1.5966e-210	0.68905	0.278	0.171	4.60444e-206	EXN	SCOC
1.66842e-210	0.418101	0.179	0.091	4.81156e-206	EXN	AAGAB
2.29895e-210	0.441652	0.138	0.063	6.62995e-206	EXN	COL23A1
2.41707e-210	0.49549	0.208	0.114	6.97059e-206	EXN	PPIP5K1
2.98648e-210	0.819728	0.186	0.098	8.6127e-206	EXN	COPRS
3.18794e-210	0.514611	0.233	0.134	9.1937e-206	EXN	ENTPD6
3.54217e-210	0.770622	0.18	0.094	1.02153e-205	EXN	C1orf216
1.26879e-209	0.928973	0.165	0.083	3.65905e-205	EXN	FBXO41
6.33493e-209	0.379744	0.303	0.188	1.82693e-204	EXN	NUDCD3
9.12262e-209	0.404731	0.214	0.118	2.63087e-204	EXN	PDK3
1.44276e-208	0.319452	0.306	0.188	4.16077e-204	EXN	PHTF1
1.70274e-208	0.5668	0.223	0.126	4.91053e-204	EXN	FAXC
5.10543e-208	0.308542	0.268	0.159	1.47236e-203	EXN	TRAK2
5.26885e-208	0.351657	0.322	0.202	1.51948e-203	EXN	PPM1A
6.62411e-208	0.69116	0.166	0.083	1.91033e-203	EXN	EIF4E3
1.28757e-207	0.366088	0.258	0.152	3.71323e-203	EXN	ASNS
1.60208e-207	0.606926	0.252	0.149	4.62023e-203	EXN	SLITRK4
4.34395e-207	1.12751	0.105	0.041	1.25275e-202	EXN	MAFK
6.50801e-207	0.370717	0.365	0.236	1.87685e-202	EXN	TUSC3
6.5102e-207	0.723785	0.185	0.098	1.87748e-202	EXN	YPEL5
6.6995e-207	0.384899	0.257	0.152	1.93207e-202	EXN	WASL
1.19126e-206	0.509729	0.276	0.167	3.43546e-202	EXN	CRLF1
1.63232e-206	0.797682	0.129	0.057	4.70744e-202	EXN	FMNL1
1.35897e-205	0.965468	0.107	0.042	3.91913e-201	EXN	RP11-736K20.5
1.5163e-205	0.42964	0.304	0.189	4.37287e-201	EXN	NDRG3
2.09728e-205	0.279657	0.197	0.106	6.04834e-201	EXN	MOK
2.69926e-205	0.533097	0.246	0.145	7.7844e-201	EXN	MLF2
4.80097e-205	0.491803	0.571	0.424	1.38455e-200	EXN	PRNP
7.49958e-205	0.375761	0.286	0.175	2.1628e-200	EXN	MADD
7.61135e-205	0.432026	0.359	0.234	2.19504e-200	EXN	KIAA1107
1.30414e-204	0.419887	0.173	0.088	3.76102e-200	EXN	ANKRD30B
2.67521e-204	0.385455	0.246	0.144	7.71505e-200	EXN	ZNF25
1.44759e-203	0.338491	0.202	0.109	4.17471e-199	EXN	LRP12
1.93096e-203	0.471351	0.232	0.132	5.56869e-199	EXN	RNF175
7.5468e-203	0.287193	0.329	0.208	2.17642e-198	EXN	C19orf60
8.85275e-203	0.548196	0.33	0.212	2.55304e-198	EXN	DKK3
1.56874e-202	0.369099	0.337	0.215	4.52408e-198	EXN	PKNOX2
6.00952e-202	0.59594	0.193	0.104	1.73309e-197	EXN	ANKRD34C-AS1
6.43101e-202	0.416633	0.155	0.076	1.85464e-197	EXN	PVRL1
7.99586e-202	0.66047	0.157	0.078	2.30593e-197	EXN	FAM131B
1.16356e-201	0.385652	0.232	0.133	3.3556e-197	EXN	ZNF106
2.32583e-201	0.416909	0.138	0.064	6.70747e-197	EXN	CEBPB
3.90149e-201	0.388553	0.644	0.49	1.12515e-196	EXN	TMSB4X
6.30721e-201	0.948101	0.111	0.045	1.81894e-196	EXN	SEH1L
1.71399e-200	0.284576	0.184	0.097	4.94297e-196	EXN	PPP6C
1.75148e-200	0.351815	0.298	0.186	5.05109e-196	EXN	SNHG23
2.1284e-200	0.405698	0.193	0.104	6.1381e-196	EXN	LAMC1
4.26926e-200	0.403729	0.256	0.152	1.23121e-195	EXN	RARB
7.19092e-200	0.500411	0.112	0.046	2.07379e-195	EXN	ZNF846
8.29655e-200	0.838842	0.12	0.052	2.39264e-195	EXN	AC005537.2
9.43415e-200	0.264992	0.249	0.147	2.72071e-195	EXN	STK25
1.52014e-199	0.561187	0.237	0.138	4.38393e-195	EXN	SERP2
2.86084e-199	0.822604	0.324	0.214	8.25037e-195	EXN	RAB3A
7.94643e-199	0.776839	0.149	0.073	2.29167e-194	EXN	SH3BGRL3
8.71101e-199	0.308639	0.439	0.302	2.51217e-194	EXN	OCIAD1
1.09023e-198	0.902443	0.122	0.054	3.14411e-194	EXN	SMPD3
2.17565e-198	0.649073	0.206	0.115	6.27435e-194	EXN	CELF3
2.8717e-198	0.664783	0.136	0.063	8.28169e-194	EXN	THOC3
3.10672e-198	0.429549	0.225	0.129	8.95947e-194	EXN	ASPHD1
4.16951e-198	0.810309	0.129	0.058	1.20245e-193	EXN	HN1
7.21624e-198	0.526782	0.211	0.119	2.08109e-193	EXN	GIPC2
7.86593e-198	0.427062	0.159	0.08	2.26846e-193	EXN	AMDHD2
1.49839e-197	0.281984	0.184	0.097	4.3212e-193	EXN	IL7
1.96184e-197	0.569167	0.104	0.041	5.65776e-193	EXN	CROT
1.98561e-197	0.369045	0.348	0.227	5.72632e-193	EXN	RTF1
1.99435e-197	0.923719	0.121	0.053	5.7515e-193	EXN	C9orf91
2.79632e-197	0.505837	0.123	0.054	8.06432e-193	EXN	RP11-356C4.5
6.43679e-197	0.436638	0.129	0.058	1.85631e-192	EXN	RP11-131L23.1
1.28081e-196	0.617446	0.205	0.114	3.69372e-192	EXN	CNTNAP1
2.33674e-196	0.349629	0.287	0.177	6.73893e-192	EXN	KCND3
1.27089e-195	0.429069	0.135	0.063	3.66511e-191	EXN	TMOD1
1.45667e-195	0.48961	0.208	0.116	4.2009e-191	EXN	BBS7
1.46335e-195	0.518418	0.282	0.175	4.22014e-191	EXN	USMG5
1.61963e-195	0.828113	0.162	0.083	4.67085e-191	EXN	LAGE3
1.97788e-195	0.303987	0.306	0.192	5.70401e-191	EXN	RP11-242P2.1
4.29458e-195	0.505009	0.248	0.148	1.23851e-190	EXN	IQSEC3
5.36647e-195	0.502217	0.212	0.12	1.54764e-190	EXN	PIP4K2B
8.91706e-195	0.496233	0.259	0.158	2.57159e-190	EXN	TMEM30A
1.00046e-194	0.603452	0.21	0.119	2.88522e-190	EXN	ELOVL4
1.35631e-194	0.69416	0.141	0.067	3.91145e-190	EXN	RP4-765H13.1
1.51895e-194	0.469473	0.201	0.111	4.3805e-190	EXN	CFAP36
1.59922e-194	0.853445	0.174	0.092	4.612e-190	EXN	GPR22
1.64028e-194	0.513799	0.188	0.101	4.7304e-190	EXN	KIAA1324
2.37963e-194	0.328698	0.345	0.227	6.86261e-190	EXN	MTCH1
4.76746e-194	0.43642	0.204	0.113	1.37489e-189	EXN	GRSF1
5.71886e-194	0.412902	0.198	0.11	1.64926e-189	EXN	ETV1
8.37493e-194	1.10157	0.102	0.04	2.41525e-189	EXN	CCDC34
2.02591e-193	0.508738	0.123	0.055	5.84252e-189	EXN	POU2F2
7.1423e-193	0.445338	0.157	0.078	2.05977e-188	EXN	AC004237.1
8.11099e-193	0.950411	0.329	0.223	2.33913e-188	EXN	TUBB2A
1.82674e-192	0.321147	0.217	0.124	5.26812e-188	EXN	METTL9
5.28669e-192	0.664117	0.152	0.076	1.52463e-187	EXN	GLT1D1
1.44546e-191	0.980159	0.134	0.063	4.16855e-187	EXN	CNIH2
7.88486e-191	0.602116	0.137	0.065	2.27391e-186	EXN	SH3GL1
8.52921e-191	0.616002	0.144	0.07	2.45974e-186	EXN	WDR46
9.86985e-191	0.756569	0.107	0.044	2.84636e-186	EXN	RP11-665C16.5
1.30744e-190	0.640541	0.2	0.112	3.77053e-186	EXN	PRMT8
1.40681e-190	0.372297	0.299	0.19	4.05711e-186	EXN	RBX1
4.11764e-190	0.394611	0.209	0.119	1.18749e-185	EXN	PPME1
5.12269e-190	0.391	0.175	0.092	1.47733e-185	EXN	OTUD3
8.80093e-190	0.576567	0.347	0.23	2.5381e-185	EXN	STMN3
1.33425e-189	0.498151	0.326	0.212	3.84784e-185	EXN	PLEKHB2
1.94661e-189	0.914645	0.127	0.059	5.61384e-185	EXN	RTN2
2.04865e-189	1.06634	0.103	0.042	5.90811e-185	EXN	SNAI3-AS1
2.84426e-189	0.55629	0.138	0.066	8.20257e-185	EXN	CBWD3
4.4399e-189	0.651552	0.212	0.122	1.28042e-184	EXN	KLC2
1.03897e-188	0.305635	0.242	0.143	2.99629e-184	EXN	CAPRIN2
2.44708e-188	0.391545	0.174	0.092	7.05713e-184	EXN	SEC16A
2.49723e-188	0.282744	0.58	0.414	7.20175e-184	EXN	PWAR6
3.69342e-188	0.307078	0.26	0.159	1.06515e-183	EXN	MIB2
6.92349e-188	0.309465	0.236	0.139	1.99667e-183	EXN	RP11-463D19.1
1.15596e-187	0.572934	0.151	0.076	3.33367e-183	EXN	VPS26B
1.58351e-187	0.259397	0.129	0.06	4.56669e-183	EXN	DNAJC24
1.8625e-187	0.733549	0.163	0.085	5.37128e-183	EXN	MPC2
3.696e-187	0.578527	0.245	0.148	1.06589e-182	EXN	CLTB
4.40721e-187	0.519571	0.137	0.066	1.271e-182	EXN	PDLIM7
4.44763e-187	0.402983	0.139	0.067	1.28265e-182	EXN	NPHP4
4.8984e-187	0.40571	0.283	0.176	1.41265e-182	EXN	CRMP1
6.7215e-187	0.574619	0.157	0.08	1.93841e-182	EXN	RPL22
6.91212e-187	0.466986	0.277	0.173	1.99339e-182	EXN	FAM168B
9.36967e-187	0.635391	0.264	0.163	2.70212e-182	EXN	ATP5G3
1.05148e-186	0.551393	0.262	0.161	3.03237e-182	EXN	UBE2N
1.06636e-186	0.258503	0.134	0.063	3.07528e-182	EXN	DIAPH2-AS1
1.16253e-186	0.726606	0.137	0.066	3.35263e-182	EXN	RAB9B
1.38252e-186	0.275515	0.228	0.133	3.98705e-182	EXN	CRHR1
1.97576e-186	0.605425	0.146	0.072	5.6979e-182	EXN	HTR4
5.01168e-186	0.503912	0.265	0.164	1.44532e-181	EXN	CCND2
1.45332e-185	0.686649	0.169	0.089	4.19123e-181	EXN	TXN
2.66189e-185	0.329781	0.314	0.201	7.67663e-181	EXN	RP11-382A20.3
3.75339e-185	0.426729	0.2	0.113	1.08244e-180	EXN	UBXN6
5.21371e-185	0.431976	0.268	0.166	1.50358e-180	EXN	GPR162
6.68698e-185	0.291881	0.2	0.112	1.92846e-180	EXN	FGFR1OP
1.02508e-184	0.439368	0.15	0.075	2.95622e-180	EXN	ST7-AS2
1.17287e-184	0.598996	0.277	0.176	3.38245e-180	EXN	RHBDD2
1.78233e-184	0.330376	0.241	0.143	5.14006e-180	EXN	FAM85B
1.95926e-184	0.530505	0.149	0.074	5.6503e-180	EXN	UXS1
1.9632e-184	0.513703	0.208	0.119	5.66166e-180	EXN	SLC6A15
2.54141e-184	0.300763	0.242	0.144	7.32918e-180	EXN	MSH2
3.40996e-184	0.252305	0.382	0.256	9.83397e-180	EXN	FAM189A1
3.87442e-184	0.677063	0.103	0.042	1.11734e-179	EXN	GSDMB
4.32102e-184	0.305078	0.149	0.074	1.24614e-179	EXN	C3orf17
5.09907e-184	0.684439	0.109	0.047	1.47052e-179	EXN	MSL3
5.64745e-184	0.865332	0.145	0.073	1.62867e-179	EXN	UQCR11
6.40626e-184	0.354752	0.214	0.123	1.8475e-179	EXN	HARS
7.46204e-184	0.341512	0.272	0.168	2.15198e-179	EXN	MROH1
7.78876e-184	0.343574	0.197	0.11	2.2462e-179	EXN	API5
9.35313e-184	0.378834	0.342	0.223	2.69735e-179	EXN	GABRA4
9.56131e-184	0.618447	0.122	0.055	2.75739e-179	EXN	YPEL1
1.05985e-183	0.551407	0.123	0.056	3.05649e-179	EXN	SLITRK1
1.12395e-183	0.380451	0.342	0.222	3.24136e-179	EXN	CLVS2
1.28982e-183	0.369483	0.298	0.191	3.71971e-179	EXN	FKBP8
1.97315e-183	0.317748	0.495	0.352	5.69036e-179	EXN	KIF1A
2.02328e-183	0.791823	0.137	0.066	5.83493e-179	EXN	FAM171A2
2.87664e-183	0.407207	0.174	0.093	8.29595e-179	EXN	TECPR1
4.31672e-183	0.52839	0.152	0.077	1.2449e-178	EXN	PEX5
8.15777e-183	0.563505	0.218	0.127	2.35262e-178	EXN	POMP
1.34899e-182	1.06949	0.114	0.051	3.89035e-178	EXN	SEPT5
3.50187e-182	0.434756	0.105	0.044	1.0099e-177	EXN	PCDH9-AS3
4.87778e-182	0.278325	0.146	0.072	1.4067e-177	EXN	CTC-490E21.12
5.36442e-182	0.440055	0.356	0.239	1.54705e-177	EXN	ATPIF1
1.07753e-181	0.889399	0.133	0.064	3.10748e-177	EXN	TUSC2
1.37404e-181	0.628262	0.117	0.052	3.96261e-177	EXN	WDR66
1.5282e-181	0.36079	0.303	0.194	4.40717e-177	EXN	ARL8B
1.59517e-181	0.671634	0.111	0.048	4.6003e-177	EXN	RP11-302B13.5
3.49487e-181	0.286183	0.167	0.088	1.00789e-176	EXN	MRPL3
3.9267e-181	0.267527	0.315	0.203	1.13242e-176	EXN	PSIP1
5.82302e-181	0.988297	0.106	0.045	1.6793e-176	EXN	PRRG3
7.03987e-181	0.333551	0.148	0.074	2.03023e-176	EXN	PUS7
7.99805e-181	0.514794	0.308	0.201	2.30656e-176	EXN	EIF1AX
8.46008e-181	0.470149	0.215	0.126	2.4398e-176	EXN	PSMD12
1.11102e-180	0.402493	0.151	0.077	3.20407e-176	EXN	FLNA
1.13625e-180	0.880312	0.162	0.086	3.27682e-176	EXN	CHGB
1.23502e-180	0.607623	0.184	0.101	3.56169e-176	EXN	TMEM179
1.28546e-180	0.915379	0.102	0.042	3.70714e-176	EXN	SPATA2L
1.74752e-180	0.464569	0.247	0.151	5.03966e-176	EXN	MZT2B
1.9509e-180	0.296217	0.185	0.102	5.6262e-176	EXN	RPS6KL1
2.40179e-180	0.823575	0.156	0.081	6.92653e-176	EXN	LSM4
2.6539e-180	0.261898	0.238	0.142	7.65358e-176	EXN	FBXO3
4.98886e-180	0.504229	0.176	0.095	1.43874e-175	EXN	CHCHD6
1.28306e-179	0.89086	0.118	0.054	3.7002e-175	EXN	SYNM
1.46789e-179	0.66273	0.238	0.145	4.23326e-175	EXN	DSE
3.24829e-179	0.397987	0.225	0.133	9.36775e-175	EXN	TIPRL
4.36011e-179	0.419958	0.237	0.142	1.25741e-174	EXN	LMTK3
1.31569e-178	0.653295	0.198	0.113	3.79432e-174	EXN	ARF5
2.32249e-178	0.489221	0.205	0.118	6.69783e-174	EXN	EI24
3.04302e-178	0.789213	0.106	0.046	8.77577e-174	EXN	STRC
6.07874e-178	0.594398	0.198	0.114	1.75305e-173	EXN	ERH
8.27744e-178	0.279606	0.236	0.141	2.38713e-173	EXN	AC105402.4
2.01166e-177	0.569006	0.198	0.113	5.80143e-173	EXN	CAMTA2
2.57117e-177	0.381513	0.173	0.093	7.415e-173	EXN	LINC00903
4.06657e-177	0.707167	0.196	0.112	1.17276e-172	EXN	SEMA6B
5.36356e-177	0.26851	0.199	0.112	1.5468e-172	EXN	IARS
8.3027e-177	0.751344	0.192	0.109	2.39442e-172	EXN	RAN
8.35533e-177	0.718685	0.114	0.051	2.40959e-172	EXN	RP13-726E6.1
1.23895e-176	0.510144	0.148	0.075	3.573e-172	EXN	ZNF382
2.07739e-176	0.528729	0.196	0.111	5.99097e-172	EXN	HOOK1
4.59856e-176	0.465793	0.177	0.097	1.32618e-171	EXN	PAIP1
7.74824e-176	0.291769	0.224	0.133	2.23451e-171	EXN	YJEFN3
8.3695e-176	1.09077	0.114	0.052	2.41368e-171	EXN	SPRN
9.90201e-176	0.82376	0.177	0.097	2.85564e-171	EXN	GPS2
1.94481e-175	0.863953	0.111	0.049	5.60864e-171	EXN	KCNF1
4.98987e-175	0.288108	0.363	0.244	1.43903e-170	EXN	CDC42
5.74347e-175	0.563494	0.279	0.179	1.65636e-170	EXN	EIF1B
6.25895e-175	0.527939	0.222	0.132	1.80502e-170	EXN	FAM217B
9.20865e-175	0.425381	0.241	0.146	2.65568e-170	EXN	ZFR2
1.4318e-174	0.386481	0.227	0.135	4.12917e-170	EXN	MTCL1
1.49694e-174	0.530308	0.181	0.101	4.31703e-170	EXN	DCTN5
2.88205e-174	0.41594	0.243	0.149	8.31155e-170	EXN	MAMDC2
5.5597e-174	0.719854	0.186	0.105	1.60336e-169	EXN	MOAP1
6.20944e-174	0.382483	0.339	0.226	1.79074e-169	EXN	G3BP2
6.24194e-174	0.370122	0.35	0.239	1.80011e-169	EXN	RPL41
6.44478e-174	0.37319	0.178	0.098	1.85861e-169	EXN	RP11-584P21.2
7.18775e-174	0.629776	0.103	0.044	2.07288e-169	EXN	ACVR1C
7.68922e-174	0.330467	0.195	0.11	2.21749e-169	EXN	MED4
1.02418e-173	0.815884	0.223	0.136	2.95364e-169	EXN	UQCRHL
1.16245e-173	0.407923	0.18	0.1	3.35239e-169	EXN	SOCS7
1.36324e-173	0.422129	0.127	0.06	3.93144e-169	EXN	KIAA0753
1.36389e-173	0.378471	0.179	0.099	3.93332e-169	EXN	CUL9
1.80056e-173	0.390796	0.204	0.118	5.19263e-169	EXN	ARPC1A
2.75425e-173	0.443459	0.119	0.055	7.94298e-169	EXN	SVIP
3.1468e-173	0.401648	0.22	0.13	9.07507e-169	EXN	TCAF1
3.71994e-173	0.364762	0.176	0.096	1.07279e-168	EXN	ZCCHC17
5.53948e-173	0.574538	0.154	0.081	1.59753e-168	EXN	SLC25A23
7.17406e-173	0.41077	0.203	0.118	2.06893e-168	EXN	RPL24
1.23739e-172	0.272013	0.257	0.159	3.56851e-168	EXN	PTGES3
2.12425e-172	0.417469	0.197	0.113	6.12614e-168	EXN	C16orf13
3.12985e-172	0.552011	0.172	0.094	9.02616e-168	EXN	TUB
4.55438e-172	0.62057	0.13	0.063	1.31344e-167	EXN	MSLN
6.9122e-172	0.309915	0.177	0.098	1.99341e-167	EXN	AC004053.1
8.12515e-172	0.637285	0.399	0.285	2.34321e-167	EXN	ALDOA
1.05072e-171	0.439669	0.152	0.079	3.03017e-167	EXN	TNFRSF21
5.02463e-171	0.809287	0.107	0.047	1.44905e-166	EXN	POLR3H
5.36689e-171	0.260179	0.25	0.152	1.54776e-166	EXN	SLC41A2
8.99036e-171	0.494245	0.28	0.178	2.59273e-166	EXN	MPPED1
1.08819e-170	0.464105	0.165	0.089	3.13822e-166	EXN	CSRNP2
1.26347e-170	0.369262	0.18	0.1	3.64372e-166	EXN	STK24
1.27228e-170	0.725683	0.195	0.113	3.66912e-166	EXN	SDCBP
1.47633e-170	0.891446	0.163	0.088	4.25759e-166	EXN	RFK
1.69213e-170	0.275263	0.174	0.095	4.87992e-166	EXN	CTD-2561J22.3
1.97856e-170	0.425032	0.387	0.27	5.70598e-166	EXN	RPL15
1.97967e-170	0.672872	0.152	0.08	5.70916e-166	EXN	BCAP31
2.3826e-170	0.384528	0.378	0.261	6.87118e-166	EXN	YPEL3
2.45524e-170	0.674202	0.173	0.096	7.08066e-166	EXN	CLEC2L
3.12285e-170	0.417462	0.264	0.166	9.00599e-166	EXN	MAPRE3
5.7455e-170	0.719759	0.142	0.072	1.65694e-165	EXN	MAT2B
7.71929e-170	0.437082	0.111	0.05	2.22617e-165	EXN	RFC3
8.10383e-170	0.399493	0.224	0.133	2.33706e-165	EXN	CNST
1.34543e-169	0.442201	0.294	0.189	3.8801e-165	EXN	PTGR1
1.79088e-169	0.26416	0.173	0.095	5.16472e-165	EXN	NBN
2.62277e-169	0.368145	0.183	0.102	7.56379e-165	EXN	GLS2
3.41986e-169	0.376107	0.355	0.238	9.86253e-165	EXN	PLPPR4
3.60302e-169	0.276996	0.162	0.087	1.03907e-164	EXN	MALT1
3.65877e-169	0.323362	0.185	0.104	1.05515e-164	EXN	TAPBP
1.16605e-168	0.619552	0.204	0.12	3.36278e-164	EXN	PITHD1
1.37438e-168	0.363815	0.175	0.097	3.96357e-164	EXN	SLC35A1
3.74108e-168	0.636413	0.111	0.05	1.07889e-163	EXN	PAPSS2
5.91483e-168	0.471896	0.134	0.066	1.70578e-163	EXN	SNAP47
1.54314e-167	0.392516	0.17	0.093	4.45025e-163	EXN	TMEM50A
2.12067e-167	0.552664	0.181	0.102	6.11581e-163	EXN	CHMP5
3.87309e-167	0.44148	0.142	0.073	1.11696e-162	EXN	CAP1
9.42376e-167	0.560437	0.132	0.065	2.71772e-162	EXN	C2orf69
9.82223e-167	0.991154	0.112	0.051	2.83263e-162	EXN	CAMK1G
2.56816e-166	0.531673	0.202	0.119	7.40633e-162	EXN	NECAP1
4.62595e-166	0.339194	0.163	0.088	1.33408e-161	EXN	CTD-2269F5.1
5.28997e-166	0.805527	0.103	0.046	1.52557e-161	EXN	THBS3
5.33513e-166	0.392204	0.112	0.051	1.5386e-161	EXN	KLF13
5.82427e-166	0.813002	0.153	0.082	1.67966e-161	EXN	MYL12B
5.90568e-166	0.385854	0.203	0.119	1.70314e-161	EXN	CELSR2
7.01568e-166	0.484544	0.506	0.376	2.02325e-161	EXN	HSP90AB1
7.64905e-166	0.458188	0.429	0.304	2.20591e-161	EXN	PNMA2
8.79559e-166	0.402356	0.146	0.076	2.53656e-161	EXN	RABL2A
1.93844e-165	0.629524	0.1	0.043	5.59026e-161	EXN	HHAT
2.91642e-165	0.343605	0.16	0.086	8.41066e-161	EXN	NCK2
3.21791e-165	0.656765	0.111	0.05	9.28013e-161	EXN	IL12RB2
3.26815e-165	0.702957	0.198	0.117	9.42503e-161	EXN	TSPYL4
4.21402e-165	0.436477	0.168	0.092	1.21528e-160	EXN	STX3
4.21519e-165	0.252027	0.237	0.145	1.21562e-160	EXN	VPS9D1
6.54475e-165	0.377754	0.146	0.075	1.88744e-160	EXN	THSD4-AS1
1.01071e-164	0.707067	0.117	0.055	2.91479e-160	EXN	NRG4
1.34854e-164	0.396712	0.202	0.118	3.88906e-160	EXN	TOMM70A
1.98489e-164	0.635336	0.273	0.176	5.72423e-160	EXN	ISCU
2.73578e-164	1.05551	0.123	0.06	7.8897e-160	EXN	FABP3
8.06955e-164	0.336437	0.251	0.156	2.32718e-159	EXN	C7orf50
8.20047e-164	0.304126	0.198	0.115	2.36493e-159	EXN	AHDC1
1.15871e-163	0.397873	0.129	0.063	3.34159e-159	EXN	NAF1
2.0654e-163	0.664883	0.174	0.098	5.95642e-159	EXN	C4orf3
2.55907e-163	0.344813	0.265	0.168	7.38011e-159	EXN	FLOT1
4.86858e-163	0.556437	0.124	0.06	1.40405e-158	EXN	TTC5
5.70897e-163	0.564663	0.176	0.099	1.64641e-158	EXN	ANKRD46
6.57888e-163	0.364534	0.43	0.309	1.89728e-158	EXN	ACTG1
8.95824e-163	0.469979	0.141	0.073	2.58347e-158	EXN	PER2
9.17297e-163	0.451539	0.155	0.083	2.64539e-158	EXN	CFAP69
1.23163e-162	0.486517	0.223	0.135	3.55191e-158	EXN	CAMLG
1.3892e-162	0.326011	0.278	0.178	4.0063e-158	EXN	CD200
1.39126e-162	0.279745	0.222	0.133	4.01225e-158	EXN	IRS2
2.02414e-162	0.611635	0.184	0.106	5.83742e-158	EXN	PIANP
7.49852e-162	0.52721	0.18	0.102	2.1625e-157	EXN	TPGS2
8.55254e-162	0.320264	0.136	0.069	2.46647e-157	EXN	RP11-206L10.9
2.11733e-161	0.424979	0.122	0.059	6.10617e-157	EXN	RPE
2.85211e-161	0.394319	0.207	0.124	8.2252e-157	EXN	BAIAP2L1
4.12221e-161	0.696249	0.116	0.055	1.18881e-156	EXN	RP11-53O19.3
5.38562e-161	0.290506	0.155	0.083	1.55316e-156	EXN	PCID2
6.75049e-161	0.575169	0.298	0.198	1.94677e-156	EXN	SOD1
7.65448e-161	0.314799	0.301	0.199	2.20748e-156	EXN	ATP5E
8.34319e-161	0.685618	0.221	0.136	2.40609e-156	EXN	RNF187
8.71386e-161	0.516355	0.19	0.11	2.51299e-156	EXN	C3orf14
1.7423e-160	0.364396	0.251	0.157	5.02463e-156	EXN	DDHD2
2.30771e-160	0.334549	0.226	0.138	6.6552e-156	EXN	EIF5
3.94914e-160	0.901057	0.106	0.048	1.13889e-155	EXN	LRTM2
5.067e-160	0.60595	0.118	0.057	1.46127e-155	EXN	MORN1
5.60356e-160	0.769608	0.144	0.075	1.61601e-155	EXN	RIMKLA
5.89463e-160	0.732058	0.161	0.089	1.69995e-155	EXN	POLR2K
9.19731e-160	0.614773	0.134	0.068	2.65241e-155	EXN	KATNB1
2.43865e-159	0.484587	0.148	0.078	7.03282e-155	EXN	C19orf53
2.70733e-159	0.300521	0.148	0.078	7.80768e-155	EXN	RP11-118M9.3
5.62466e-159	0.437463	0.152	0.081	1.62209e-154	EXN	CBLN4
6.25095e-159	0.747909	0.177	0.101	1.80271e-154	EXN	SPRYD3
6.91221e-159	0.805239	0.1	0.044	1.99341e-154	EXN	MAP1S
7.42871e-159	0.464647	0.142	0.074	2.14237e-154	EXN	SPRYD7
1.12903e-158	0.334598	0.193	0.113	3.25601e-154	EXN	SULT1A1
1.91808e-158	0.35139	0.169	0.094	5.53156e-154	EXN	ZNRF1
2.61994e-158	0.528036	0.221	0.135	7.55564e-154	EXN	AASDHPPT
1.61108e-157	0.590135	0.109	0.05	4.6462e-153	EXN	AK4
1.69214e-157	0.273555	0.192	0.112	4.87995e-153	EXN	RPL37
2.20446e-157	0.259435	0.174	0.098	6.35743e-153	EXN	SDAD1
2.43563e-157	0.387776	0.115	0.055	7.02411e-153	EXN	EMB
2.93978e-157	0.409358	0.153	0.083	8.47805e-153	EXN	MICAL1
4.48635e-157	0.360076	0.159	0.087	1.29382e-152	EXN	CCNDBP1
4.50888e-157	0.358274	0.183	0.105	1.30031e-152	EXN	GTF3A
8.48144e-157	0.333695	0.192	0.112	2.44596e-152	EXN	TRAPPC6B
1.00013e-156	0.712636	0.153	0.083	2.88427e-152	EXN	UBE2M
1.09621e-156	0.482408	0.256	0.163	3.16135e-152	EXN	CISD1
1.35131e-156	0.533067	0.101	0.045	3.89703e-152	EXN	NMRK1
1.9788e-156	0.481285	0.316	0.213	5.70666e-152	EXN	CHCHD10
4.22763e-156	0.550216	0.168	0.094	1.2192e-151	EXN	ABHD8
9.27812e-156	0.837048	0.12	0.059	2.67572e-151	EXN	FOSL2
9.35471e-156	0.559525	0.132	0.068	2.6978e-151	EXN	CBARP
1.4486e-155	0.487904	0.132	0.067	4.17761e-151	EXN	STRN4
1.99152e-155	0.623704	0.161	0.089	5.74333e-151	EXN	PFDN4
3.22702e-155	0.355551	0.315	0.212	9.3064e-151	EXN	DNAJB6
7.10589e-155	0.485844	0.152	0.082	2.04927e-150	EXN	CRKL
7.58708e-155	0.272726	0.27	0.174	2.18804e-150	EXN	IGF2R
9.46252e-155	1.05585	0.105	0.049	2.7289e-150	EXN	SMIM10L2A
2.41565e-154	0.52766	0.111	0.052	6.96648e-150	EXN	KIF21B
3.46355e-154	0.530676	0.181	0.104	9.98855e-150	EXN	COPS8
3.75692e-154	0.274566	0.188	0.109	1.08346e-149	EXN	GIT1
3.87946e-154	0.667577	0.146	0.079	1.1188e-149	EXN	NPM2
7.5808e-154	0.713268	0.155	0.086	2.18623e-149	EXN	PRRT1
8.44872e-154	0.372789	0.153	0.083	2.43653e-149	EXN	LRRC9
9.6673e-154	0.283956	0.303	0.202	2.78795e-149	EXN	RPL36
1.05577e-153	0.369931	0.261	0.169	3.04472e-149	EXN	RPL3
1.20865e-153	0.570531	0.152	0.082	3.48561e-149	EXN	FAM234B
2.04617e-153	0.382114	0.124	0.061	5.90096e-149	EXN	CHST15
3.03851e-153	0.587926	0.144	0.077	8.76277e-149	EXN	THOC7
4.01177e-153	0.39411	0.303	0.204	1.15695e-148	EXN	UQCRB
4.31717e-153	0.780962	0.101	0.046	1.24503e-148	EXN	SEMA7A
5.03287e-153	0.49592	0.186	0.108	1.45143e-148	EXN	BAG4
8.59787e-153	0.601293	0.114	0.055	2.47954e-148	EXN	SLC12A8
1.35418e-152	0.37529	0.19	0.112	3.90532e-148	EXN	ARHGEF17
1.53152e-152	0.469357	0.309	0.208	4.41675e-148	EXN	EIF4G2
2.03269e-152	0.530545	0.188	0.11	5.86207e-148	EXN	SUCLA2
2.81876e-152	0.363991	0.214	0.13	8.12902e-148	EXN	SLC9B2
4.18123e-152	0.416107	0.193	0.114	1.20582e-147	EXN	C16orf72
5.10942e-152	0.34277	0.191	0.112	1.4735e-147	EXN	TMEM170B
5.91091e-152	0.250295	0.137	0.072	1.70465e-147	EXN	ERICH1
9.64243e-152	0.382134	0.165	0.092	2.78078e-147	EXN	GARS
1.03331e-151	0.533649	0.129	0.066	2.97996e-147	EXN	TM6SF1
3.45541e-151	0.260641	0.228	0.14	9.96505e-147	EXN	PCDH10
3.55682e-151	0.445001	0.451	0.333	1.02575e-146	EXN	TSPAN7
4.81929e-151	0.335594	0.168	0.095	1.38984e-146	EXN	MIATNB
4.90483e-151	0.543494	0.166	0.093	1.4145e-146	EXN	TCEAL1
1.28227e-150	0.529227	0.103	0.047	3.69794e-146	EXN	MARC2
2.82256e-150	0.387893	0.214	0.131	8.13997e-146	EXN	CHD3
3.0962e-150	0.302236	0.12	0.059	8.92912e-146	EXN	HRH1
3.38733e-150	1.04469	0.111	0.054	9.76871e-146	EXN	LLNLF-187D8.1
5.72774e-150	0.530845	0.128	0.066	1.65182e-145	EXN	CTD-2047H16.4
7.17293e-150	0.555989	0.125	0.063	2.0686e-145	EXN	RRP12
7.67783e-150	0.781771	0.154	0.085	2.21421e-145	EXN	RNF208
9.8285e-150	0.389917	0.196	0.118	2.83444e-145	EXN	GNB2
1.06328e-149	0.546416	0.18	0.105	3.0664e-145	EXN	NOVA2
1.70304e-149	0.700785	0.317	0.217	4.91138e-145	EXN	MAP1A
2.05155e-149	0.704783	0.129	0.067	5.91647e-145	EXN	PTP4A1
2.34771e-149	0.276971	0.205	0.123	6.77057e-145	EXN	CPT1C
3.11782e-149	0.459662	0.225	0.14	8.99149e-145	EXN	NDUFS5
3.89273e-149	0.488454	0.237	0.149	1.12263e-144	EXN	MAP7D2
3.91446e-149	0.346539	0.135	0.07	1.12889e-144	EXN	SUSD1
6.77867e-149	0.402728	0.108	0.051	1.9549e-144	EXN	DAGLB
1.30688e-148	0.491019	0.123	0.062	3.7689e-144	EXN	ST3GAL2
2.00786e-148	0.376553	0.112	0.054	5.79045e-144	EXN	CHURC1-FNTB
2.32834e-148	0.333247	0.224	0.14	6.71469e-144	EXN	OOEP
2.51926e-148	0.592304	0.119	0.059	7.26529e-144	EXN	DNAL1
4.10984e-148	0.664625	0.104	0.048	1.18524e-143	EXN	ENPP5
5.31974e-148	0.541525	0.173	0.1	1.53416e-143	EXN	FBXO2
7.84521e-148	0.775638	0.1	0.045	2.26248e-143	EXN	SEMA4F
8.37864e-148	0.435483	0.113	0.055	2.41632e-143	EXN	C8orf44-SGK3
1.5881e-147	0.554674	0.258	0.168	4.57992e-143	EXN	NCS1
2.00242e-147	0.341958	0.315	0.212	5.77479e-143	EXN	ZYG11B
2.41139e-147	0.510657	0.18	0.105	6.95422e-143	EXN	POLR2L
4.56265e-147	0.625505	0.17	0.098	1.31582e-142	EXN	PNMA1
5.30068e-147	0.434237	0.161	0.09	1.52866e-142	EXN	RP11-242P2.2
5.70938e-147	0.284066	0.21	0.129	1.64653e-142	EXN	CNTN6
7.74797e-147	0.312266	0.204	0.123	2.23444e-142	EXN	FBXO16
8.69299e-147	0.378378	0.146	0.079	2.50697e-142	EXN	ANKRD7
9.74802e-147	0.339249	0.135	0.071	2.81123e-142	EXN	MPHOSPH6
1.45088e-146	0.405155	0.215	0.133	4.18419e-142	EXN	FAM199X
2.50478e-146	0.282083	0.225	0.14	7.22353e-142	EXN	RAB14
2.53996e-146	0.319057	0.214	0.132	7.32499e-142	EXN	KCNN2
1.78986e-145	0.338687	0.141	0.075	5.16177e-141	EXN	ZADH2
2.15282e-145	0.464016	0.467	0.349	6.20851e-141	EXN	FAIM2
2.60953e-145	0.725546	0.118	0.059	7.52563e-141	EXN	BLOC1S2
2.93808e-145	0.516081	0.21	0.13	8.47313e-141	EXN	DNAJA1
4.82107e-145	0.523071	0.182	0.108	1.39035e-140	EXN	ADGRA1
5.01307e-145	0.280029	0.39	0.272	1.44572e-140	EXN	EFR3A
6.61924e-145	0.373384	0.287	0.192	1.90892e-140	EXN	DNAJC5
1.07191e-144	0.515495	0.233	0.148	3.09127e-140	EXN	PPFIA3
1.36033e-144	0.628468	0.135	0.072	3.92305e-140	EXN	CPNE7
1.60152e-144	0.615512	0.138	0.074	4.61863e-140	EXN	BZW1
1.69349e-144	0.501682	0.113	0.055	4.88385e-140	EXN	C4orf47
2.16626e-144	0.416353	0.266	0.174	6.24728e-140	EXN	CD99L2
3.36249e-144	0.861909	0.103	0.049	9.69708e-140	EXN	RASGEF1A
3.46493e-144	0.327068	0.158	0.089	9.99251e-140	EXN	HMOX2
4.19237e-144	0.50001	0.151	0.084	1.20904e-139	EXN	SMIM12
1.52644e-143	0.321362	0.345	0.236	4.40211e-139	EXN	GPRASP1
1.68287e-143	0.53327	0.14	0.076	4.85323e-139	EXN	UBFD1
2.72794e-143	0.338866	0.119	0.06	7.86711e-139	EXN	ARRDC1
3.115e-143	0.348578	0.136	0.072	8.98336e-139	EXN	FAM95B1
4.85042e-143	0.474772	0.245	0.158	1.39881e-138	EXN	TCEAL2
5.0459e-143	0.429763	0.193	0.116	1.45519e-138	EXN	HSPA4
1.03107e-142	0.424636	0.124	0.063	2.97351e-138	EXN	STK40
2.55587e-142	0.310593	0.215	0.133	7.37086e-138	EXN	PFDN2
2.62487e-142	0.526949	0.156	0.088	7.56985e-138	EXN	EAF1
5.22783e-142	0.316376	0.275	0.18	1.50766e-137	EXN	RASGRF1
5.79359e-142	0.336973	0.124	0.064	1.67081e-137	EXN	CCNT2-AS1
9.33819e-142	0.383609	0.256	0.167	2.69304e-137	EXN	TMEM63B
9.74671e-142	0.54145	0.14	0.076	2.81085e-137	EXN	UCHL5
1.28778e-141	0.331227	0.163	0.093	3.71383e-137	EXN	AP1M1
1.37065e-141	0.329862	0.196	0.118	3.95282e-137	EXN	EXTL3
2.0736e-141	0.355913	0.224	0.141	5.98004e-137	EXN	CTSB
2.31621e-141	0.294662	0.177	0.105	6.67971e-137	EXN	UBE2Z
3.5479e-141	0.279117	0.188	0.113	1.02318e-136	EXN	DDX42
3.57357e-141	0.319831	0.16	0.091	1.03058e-136	EXN	COX11
3.79638e-141	0.372397	0.103	0.049	1.09484e-136	EXN	FAM122B
4.1034e-141	0.373632	0.462	0.338	1.18338e-136	EXN	SARAF
6.08994e-141	0.28441	0.114	0.057	1.75628e-136	EXN	NEDD9
1.66754e-140	0.318384	0.15	0.084	4.80901e-136	EXN	CARM1
1.87663e-140	0.281721	0.114	0.057	5.41202e-136	EXN	ALDH3A2
3.18538e-140	0.511147	0.116	0.058	9.18633e-136	EXN	UBE2D1
3.57787e-140	0.399877	0.301	0.204	1.03182e-135	EXN	REEP5
6.81992e-140	0.615287	0.274	0.184	1.9668e-135	EXN	CYCS
8.28698e-140	0.570901	0.107	0.052	2.38988e-135	EXN	CD276
1.04611e-139	0.480751	0.155	0.088	3.01688e-135	EXN	RPS3A
1.22349e-139	0.372371	0.14	0.076	3.52842e-135	EXN	MCTS1
1.24885e-139	0.290599	0.233	0.148	3.60156e-135	EXN	OAT
3.04099e-139	0.305289	0.237	0.152	8.76991e-135	EXN	CLCN4
4.39296e-139	0.72429	0.215	0.138	1.26689e-134	EXN	SCN1B
5.34677e-139	0.56138	0.115	0.058	1.54195e-134	EXN	PARVB
8.57394e-139	0.835338	0.103	0.05	2.47264e-134	EXN	RP11-434B12.1
1.33607e-138	0.315619	0.147	0.081	3.85308e-134	EXN	DNAH9
2.77837e-138	0.552554	0.166	0.097	8.01253e-134	EXN	TIMM17A
3.18804e-138	0.39038	0.123	0.064	9.19399e-134	EXN	PPP6R1
5.84092e-138	0.438682	0.104	0.05	1.68446e-133	EXN	METAP1
6.42104e-138	0.379883	0.129	0.069	1.85176e-133	EXN	RABL2B
8.42894e-138	0.325833	0.112	0.056	2.43082e-133	EXN	TMEM196
[truncated: 8,211 more rows]
