# Supplementary material
Source: Research Square preprint supplement (doi:10.21203/rs.3.rs-8976053/v1)
Supplement: Supplementary file 6 [file 553f4a4cf9ac2ee31018cb8f.xlsx]

## Sheet: Sheet1
gene	logFC	AveExpr	t	P.Value	adj.P.Val	B
DDX24	1.23336	41.6303	6.91814	3.42894e-08	0.000629623	8.02495
ABCF1	1.06002	56.9952	5.57839	2.25601e-06	0.0148318	4.49215
CLSTN1	0.816446	33.0234	5.53688	2.56952e-06	0.0148318	4.38105
DDX23	0.822638	57.163	5.46375	3.23098e-06	0.0148318	4.18531
NUP210	0.95694	43.0466	5.33325	4.86041e-06	0.0178494	3.83593
SLC25A22	0.992034	35.1225	5.21932	6.93793e-06	0.0212324	3.53099
ZCCHC3	0.83753	41.7696	5.08847	1.04307e-05	0.0273611	3.18116
TES	0.673021	28.1071	4.98469	1.4401e-05	0.033054	2.90413
BOP1	0.774341	42.5693	4.90567	1.83985e-05	0.037537	2.69356
ELMO2	0.709326	34.6307	4.85664	2.14127e-05	0.039318	2.56309
PIGO	0.668848	44.3675	4.78753	2.65068e-05	0.044247	2.37949
TRIM28	0.882892	55.0409	4.74857	2.98884e-05	0.0457343	2.27616
XLOC_l2_006862	-0.936018	26.0729	-4.59321	4.81603e-05	0.0650642	1.86541
HSPB1	1.17921	28.3192	4.57514	5.08975e-05	0.0650642	1.8178
GANAB	0.773452	45.0063	4.53392	5.77277e-05	0.0650642	1.70934
PUM1	0.606143	38.8401	4.52951	5.85112e-05	0.0650642	1.69772
POLR3D	0.870282	37.6484	4.51997	6.02381e-05	0.0650642	1.67267
XLOC_003505	-0.61196	23.4428	-4.49552	6.49005e-05	0.0662057	1.60844
DAZAP1	0.893856	43.0479	4.47623	6.88266e-05	0.0665155	1.55784
PLOD3	0.853296	62.9987	4.44547	7.55763e-05	0.0693866	1.47724
VTA1	0.55776	26.9994	4.40094	8.65143e-05	0.0756464	1.36078
MFHAS1	1.26837	39.9048	4.36432	9.66638e-05	0.0799291	1.2652
EIF2B5	0.718437	53.4861	4.35271	0.000100118	0.0799291	1.23495
GPATCH8	0.78146	39.4255	4.33664	0.000105099	0.0804092	1.19312
CGGBP1	0.561588	19.227	4.30728	0.00011484	0.0843473	1.11675
CTR9	0.554821	28.503	4.29205	0.000120233	0.0849122	1.07721
XLOC_004375	-0.744823	27.7899	-4.27323	0.000127246	0.0857824	1.02836
SLC16A5	-0.754171	38.6704	-4.26405	0.000130809	0.0857824	1.00457
ZMAT3	0.839455	38.8222	4.23805	0.000141442	0.0880299	0.937236
CRKL	0.683914	26.0455	4.22617	0.000146576	0.0880299	0.906518
BAZ1B	0.655466	38.0421	4.21862	0.000149937	0.0880299	0.886989
NUP155	0.788733	37.9489	4.19549	0.000160698	0.0880299	0.827278
ZNF777	0.805659	43.0634	4.191	0.000162875	0.0880299	0.815686
NRIP1	0.68963	25.1409	4.19074	0.000163	0.0880299	0.815023
ARHGEF5	0.821548	31.7176	4.17297	0.000171901	0.0901841	0.769227
DMAP1	0.828552	52.9944	4.10977	0.000207583	0.0943604	0.606775
CCT7	0.528114	65.055	4.10429	0.000210996	0.0943604	0.592729
PSMB2	0.525975	55.7048	4.09857	0.000214622	0.0943604	0.578055
PNN	0.85044	39.4658	4.09754	0.000215281	0.0943604	0.575417
USP19	0.575328	43.9626	4.09313	0.00021812	0.0943604	0.564135
ANKRD36BP1	1.04582	38.0134	4.07588	0.000229598	0.0943604	0.519974
WBP11	0.635043	47.2499	4.06662	0.000235998	0.0943604	0.4963
SETD1A	0.622344	35.4183	4.06446	0.000237514	0.0943604	0.490786
WDR81	0.924609	54.1238	4.06259	0.000238836	0.0943604	0.486007
JAK1	0.634188	31.8057	4.05518	0.000244148	0.0943604	0.467068
COPA	0.626724	24.986	4.04602	0.000250871	0.0943604	0.443678
CISD1	0.887081	32.0662	4.04293	0.000253181	0.0943604	0.435788
ANAPC16	0.789923	28.5373	4.03981	0.000255531	0.0943604	0.427835
XLOC_001631	-0.615694	26.5807	-4.02879	0.000264005	0.0943604	0.399751
ITGB4	-1.05453	14.0968	-4.02829	0.000264397	0.0943604	0.39847
RPRD2	0.495433	42.3258	4.02088	0.000270264	0.0943604	0.37958
LOC100240735	1.02544	24.7967	4.01581	0.000274341	0.0943604	0.36669
CCDC120	0.652052	33.4705	4.01334	0.000276353	0.0943604	0.360402
DHX30	0.591794	46.8131	4.01194	0.0002775	0.0943604	0.356834
C9orf114	0.756899	51.1759	3.99523	0.00029155	0.0968122	0.314322
XPO5	0.675129	41.4107	3.98661	0.000299059	0.0968122	0.292438
VDAC2	0.767691	66.9048	3.98495	0.000300528	0.0968122	0.28822
HNRNPM	0.752932	39.9822	3.9725	0.000311764	0.0987001	0.256632
DCAF7	0.653576	31.8285	3.96168	0.000321866	0.100171	0.229191
RRP1B	0.818775	40.0538	3.95553	0.000327744	0.100301	0.213618
NCOR2	0.621792	37.5169	3.94443	0.000338631	0.101738	0.1855
HTATSF1P2	-0.883552	24.4021	-3.93955	0.000343523	0.101738	0.17316
PRRC2C	0.559813	24.3313	3.92279	0.00036086	0.104588	0.130802
AP4E1	0.693161	29.909	3.91448	0.00036977	0.104588	0.10982
KIAA2026	0.802948	46.5481	3.90724	0.000377707	0.104588	0.0915536
ABTB1	-0.644837	48.6783	-3.90329	0.000382102	0.104588	0.0816031
RFC1	0.649444	33.0066	3.90108	0.000384586	0.104588	0.076029
SLC6A6	-0.554807	29.2853	-3.89866	0.000387321	0.104588	0.0699347
RANGAP1	0.677295	51.3353	3.89344	0.000393293	0.104661	0.0567744
EPRS	0.592855	46.3701	3.88402	0.00040429	0.106051	0.0330574
FBXO46	0.835745	59.2483	3.86145	0.000431869	0.108989	-0.0236874
SQLE	0.769852	18.7741	3.85581	0.00043904	0.108989	-0.037847
SLC9A9	0.793011	31.9205	3.85021	0.000446274	0.108989	-0.0518967
MAFF	-1.07308	42.2904	-3.84409	0.000454323	0.108989	-0.0672634
DNMBP	0.76804	30.4393	3.84159	0.000457646	0.108989	-0.0735285
FAM193A	0.679586	44.8216	3.8406	0.000458965	0.108989	-0.0760026
GATA3	0.844049	27.2445	3.82948	0.00047408	0.108989	-0.103855
SSRP1	0.680083	56.5163	3.82608	0.000478803	0.108989	-0.112375
FKBP4	0.898251	33.3555	3.8225	0.000483817	0.108989	-0.121331
C17orf67	0.847173	29.9255	3.82025	0.000486991	0.108989	-0.12695
EHMT2	0.824438	40.3036	3.81648	0.000492359	0.108989	-0.136373
C16orf62	0.916854	40.7389	3.81434	0.000495446	0.108989	-0.141743
LMNB2	0.82228	31.2714	3.81228	0.000498413	0.108989	-0.146875
AHSA1	0.815583	43.275	3.81216	0.000498588	0.108989	-0.147176
TGS1	0.601662	36.3324	3.80282	0.000512322	0.109479	-0.170529
FBXO21	0.497687	35.0337	3.80253	0.000512754	0.109479	-0.171252
CIR1	-0.690572	44.4576	-3.79723	0.00052071	0.1099	-0.184482
TRIM26	0.812464	40.5651	3.78557	0.000538632	0.1118	-0.213559
ENOX2	0.588569	30.4958	3.78106	0.000545724	0.1118	-0.224797
TRUB2	0.599001	48.9274	3.77964	0.000547979	0.1118	-0.228339
WBSCR16	0.848543	43.1618	3.7673	0.000567934	0.11408	-0.259066
APEX2	0.711163	56.2867	3.76278	0.000575415	0.11408	-0.270307
H1FX	0.734238	37.0495	3.76135	0.000577796	0.11408	-0.273853
FASN	0.705231	39.1622	3.74468	0.000606344	0.114504	-0.315273
FGFR1OP	-0.740776	28.1887	-3.74268	0.000609859	0.114504	-0.320237
APOBEC3C	0.892401	38.0854	3.73975	0.00061505	0.114504	-0.327516
ZNF226	-0.544073	35.6667	-3.73678	0.000620347	0.114504	-0.334879
SNAP47	0.561038	46.3588	3.73663	0.000620617	0.114504	-0.335252
CKAP5	0.782094	29.23	3.73587	0.000621969	0.114504	-0.337122
EXT2	0.672533	39.5765	3.73497	0.000623593	0.114504	-0.339361
SF3B2	0.509394	53.5122	3.72951	0.000633506	0.114648	-0.352903
METTL13	0.700308	54.0633	3.72768	0.000636866	0.114648	-0.357444
XLOC_l2_009320	-0.50638	28.4149	-3.72072	0.00064978	0.115838	-0.37468
NCOA7	0.606494	19.1579	3.71068	0.000668859	0.117707	-0.399524
PUF60	0.545498	58.67	3.70849	0.000673086	0.117707	-0.404931
UGT2B11	-0.62784	16.0581	-3.69557	0.000698599	0.119615	-0.436864
ALDH18A1	0.805673	44.1312	3.69478	0.000700191	0.119615	-0.438818
XLOC_004924	-0.589904	21.1103	-3.69312	0.000703543	0.119615	-0.442916
TAF6	0.773199	48.5133	3.68918	0.000711554	0.119868	-0.452634
GNE	0.556568	32.4425	3.68031	0.000729922	0.121439	-0.474504
CHRM4	-1.0338	6.12126	-3.67807	0.00073463	0.121439	-0.480021
USP22	0.700613	39.1588	3.67261	0.000746237	0.121439	-0.493472
CXorf65	-0.837581	32.308	-3.6721	0.000747338	0.121439	-0.494736
DDX19A	0.646578	37.6132	3.66284	0.000767452	0.123614	-0.517522
SEZ6L2	-0.864776	30.3953	-3.65837	0.000777368	0.124122	-0.528535
CYFIP2	0.576812	37.138	3.65522	0.000784416	0.124168	-0.536278
BTRC	0.718335	40.4371	3.64603	0.000805335	0.126389	-0.558852
C4orf33	-0.737861	24.0066	-3.63587	0.000829101	0.127356	-0.583795
HDAC1	0.641178	72.3249	3.63238	0.000837397	0.127356	-0.592333
NOL9	0.8453	33.7891	3.63026	0.000842493	0.127356	-0.597536
LINC00085	-0.52984	17.4002	-3.62885	0.000845893	0.127356	-0.600989
ADAM11	-0.939314	40.5532	-3.62647	0.00085168	0.127356	-0.606835
DHX38	0.828386	44.59	3.62588	0.000853106	0.127356	-0.60827
GTF3C1	0.907686	32.9373	3.6164	0.000876526	0.127542	-0.63149
BCL7B	0.950488	39.8279	3.61227	0.000886907	0.127542	-0.641583
ARHGAP17	0.59847	32.2188	3.61032	0.000891861	0.127542	-0.646358
TAS2R45	0.724601	30.3525	3.61	0.000892674	0.127542	-0.647139
XLOC_001787	-0.827336	37.8566	-3.6094	0.000894214	0.127542	-0.648617
AQR	0.50458	39.837	3.60868	0.000896034	0.127542	-0.650359
EXOSC10	0.54402	47.3987	3.60554	0.000904107	0.127685	-0.658048
VPS33B	0.873787	60.0932	3.6029	0.000910942	0.127685	-0.664504
PAPOLG	0.420519	16.1209	3.59071	0.000943122	0.129732	-0.694258
PCBP1	0.531614	59.7054	3.58996	0.000945124	0.129732	-0.696076
NUP62	0.556745	41.3907	3.58936	0.000946742	0.129732	-0.697541
XLOC_012894	0.964241	34.1476	3.58472	0.000959327	0.130168	-0.708857
C15orf44	0.595256	46.8862	3.58298	0.000964101	0.130168	-0.713111
ZNF529	0.472848	22.2864	3.5784	0.000976727	0.130445	-0.724259
MAPK7	0.690052	43.8326	3.5771	0.000980361	0.130445	-0.727441
SH2D3C	0.456572	44.6834	3.57331	0.000990975	0.130908	-0.736667
NOP2	0.805676	49.4477	3.56264	0.00102145	0.13397	-0.762612
FOXJ3	0.465224	30.6862	3.55796	0.00103511	0.134799	-0.773994
C14orf43	0.660561	34.1881	3.54467	0.00107485	0.137454	-0.806258
PABPN1	0.694849	67.8559	3.54373	0.00107772	0.137454	-0.808547
FLJ21408	-0.76585	27.1617	-3.54365	0.00107795	0.137454	-0.808729
SLC22A14	-0.508636	32.4108	-3.5391	0.00109195	0.138278	-0.819774
RNGTT	0.511617	30.1057	3.53549	0.00110317	0.13863	-0.828531
MESDC1	0.504921	33.0623	3.53271	0.00111186	0.13863	-0.835247
FBLN2	0.901245	22.7406	3.52673	0.00113085	0.13863	-0.849747
LOC100506914	-0.787182	17.2645	-3.52565	0.00113429	0.13863	-0.852346
CCDC22	0.600106	51.0159	3.52362	0.00114081	0.13863	-0.857254
KCTD5	0.598075	31.1565	3.51759	0.00116043	0.13863	-0.871851
SERTAD2	0.690541	31.9238	3.51738	0.00116111	0.13863	-0.872352
SRRM1	0.591785	36.8451	3.51648	0.00116408	0.13863	-0.874538
RAB11FIP3	0.723028	43.6623	3.51513	0.00116851	0.13863	-0.87779
COG2	0.6091	48.1668	3.51119	0.00118159	0.13863	-0.887312
POGK	0.789639	52.6595	3.51115	0.00118173	0.13863	-0.88742
XLOC_004205	-0.663867	32.1409	-3.51007	0.00118533	0.13863	-0.890018
TTC4	0.853965	50.8531	3.50612	0.00119862	0.138635	-0.89956
XLOC_005737	-0.593755	26.826	-3.50403	0.00120569	0.138635	-0.904596
TUBGCP4	0.732342	24.4874	3.50335	0.00120802	0.138635	-0.906245
CSRP2BP	0.627606	40.7719	3.5009	0.00121639	0.138729	-0.912156
XLOC_l2_009572	-1.07064	34.3057	-3.49298	0.00124384	0.139112	-0.93125
DEF8	-0.901481	45.8023	-3.49088	0.00125121	0.139112	-0.936302
NDUFA9	0.583362	45.1662	3.49028	0.00125333	0.139112	-0.937755
CTCF	0.500763	29.7037	3.48919	0.00125721	0.139112	-0.940394
XLOC_000633	-0.944167	37.8611	-3.48644	0.00126694	0.139112	-0.946996
RETSAT	0.84972	28.8471	3.4853	0.00127102	0.139112	-0.949741
SUPT5H	0.694942	58.0811	3.48291	0.00127962	0.139112	-0.955512
TRAF2	0.653449	47.5227	3.48129	0.00128545	0.139112	-0.959399
LRBA	0.724452	27.2532	3.48061	0.00128793	0.139112	-0.961049
SRRT	0.480965	42.4483	3.47852	0.00129552	0.139113	-0.966075
GXYLT1	0.665611	39.6456	3.47442	0.00131054	0.139908	-0.975937
SRP68	0.684801	46.9767	3.47224	0.00131858	0.139952	-0.981163
TNFRSF10C	-0.744532	41.152	-3.46824	0.00133347	0.14072	-0.990771
ASRGL1	-0.848725	39.8453	-3.4621	0.00135666	0.142349	-1.00551
UBQLN2	0.528738	26.0322	3.4564	0.00137856	0.143065	-1.0192
FBXO31	0.913371	37.9154	3.45356	0.00138958	0.143065	-1.02601
ZNF197	0.573093	26.4166	3.45175	0.00139666	0.143065	-1.03036
MSH6	0.549844	38.6178	3.45107	0.00139933	0.143065	-1.03199
XLOC_009498	-0.629134	26.1131	-3.45027	0.00140244	0.143065	-1.03389
NCOA6	0.514415	24.0375	3.44209	0.00143499	0.145353	-1.0535
LOC100507507	0.890439	32.1706	3.44067	0.0014407	0.145353	-1.0569
TDRKH	0.709165	37.6659	3.43756	0.00145327	0.145389	-1.06432
TRIM44	0.53122	39.4123	3.43454	0.00146562	0.145389	-1.07155
KALRN	-0.718354	23.3485	-3.43387	0.00146838	0.145389	-1.07316
DPY30	-0.522179	36.809	-3.43281	0.00147273	0.145389	-1.07569
TULP3	0.551591	44.0817	3.43019	0.00148357	0.145676	-1.08196
XLOC_002541	-0.562845	22.2461	-3.42825	0.00149163	0.145688	-1.08658
ITGAM	0.477787	27.2111	3.42463	0.0015068	0.145948	-1.09523
PTCH2	-1.00255	41.7221	-3.42289	0.00151413	0.145948	-1.09938
DIAPH1	0.472195	29.5711	3.42168	0.00151928	0.145948	-1.10228
IGF2-AS	-0.559784	32.127	-3.41907	0.00153041	0.145948	-1.10851
CBR3	0.946362	20.2488	3.41822	0.00153404	0.145948	-1.11054
ATP1A4	0.71716	35.7725	3.40669	0.00158421	0.148968	-1.13803
PTPN1	0.844428	56.9364	3.40668	0.00158422	0.148968	-1.13803
HSPA14	-0.692057	39.9299	-3.40532	0.00159024	0.148968	-1.14127
CRY2	0.611399	43.6572	3.40318	0.0015998	0.148968	-1.14639
TBC1D5	0.725778	25.6276	3.40106	0.00160927	0.148968	-1.15143
GLOD4	0.516923	35.7264	3.39834	0.00162152	0.148968	-1.15791
BCRP2	0.872142	46.0037	3.39644	0.00163013	0.148968	-1.16243
WDR45	-0.56327	40.3408	-3.39631	0.00163068	0.148968	-1.16272
PPM1G	0.75324	64.4029	3.39237	0.00164869	0.149868	-1.1721
ACO1	0.612541	30.5837	3.38524	0.00168174	0.150057	-1.18905
C20orf4	0.639372	52.1917	3.38122	0.00170062	0.150057	-1.19858
C11orf82	0.616507	21.618	3.38036	0.00170469	0.150057	-1.20062
LOC100130453	-0.636873	33.0353	-3.37788	0.00171649	0.150057	-1.20651
MRPL19	0.4813	29.1718	3.37611	0.00172499	0.150057	-1.21072
CRABP2	-0.524793	27.7916	-3.37518	0.00172943	0.150057	-1.21292
HEATR5B	0.592032	30.6871	3.37463	0.00173208	0.150057	-1.21423
COX1	0.6271	40.8567	3.37427	0.0017338	0.150057	-1.21507
NUP93	0.594639	32.7925	3.37274	0.00174117	0.150057	-1.21869
RUVBL2	0.699121	65.5375	3.37195	0.00174501	0.150057	-1.22057
NPHS2	-0.942534	33.2924	-3.37132	0.00174807	0.150057	-1.22207
INPP5D	0.506768	47.5638	3.37116	0.00174884	0.150057	-1.22244
BCL9L	0.616499	26.1741	3.36708	0.00176875	0.150175	-1.23211
NUDC	0.606831	51.8979	3.36692	0.00176955	0.150175	-1.23249
XLOC_004644	-0.590542	26.4986	-3.36502	0.00177889	0.150175	-1.23698
DCAF4	0.66676	25.9733	3.36421	0.00178293	0.150175	-1.23892
USP34	0.490477	29.4092	3.35971	0.00180528	0.151363	-1.24955
LOC100128697	-1.05421	20.1459	-3.35588	0.0018246	0.152054	-1.25863
TMEM109	0.701209	33.9899	3.35352	0.00183653	0.152054	-1.26419
XLOC_l2_015855	-0.508222	13.7412	-3.35316	0.00183837	0.152054	-1.26505
XLOC_l2_005826	-0.634022	29.7727	-3.35101	0.00184936	0.152278	-1.27014
NOLC1	0.521388	28.2666	3.34751	0.00186736	0.153073	-1.2784
ATIC	0.679439	44.7642	3.34219	0.00189509	0.154656	-1.29097
C20orf106	-0.728016	30.33	-3.3354	0.00193099	0.156889	-1.30698
ASPHD2	0.611158	25.3584	3.33085	0.00195544	0.158175	-1.31771
SNRNP200	0.500235	36.8135	3.31626	0.00203583	0.16246	-1.35205
PTPN23	0.534576	38.9245	3.31518	0.00204188	0.16246	-1.35458
CCDC93	0.622993	36.4457	3.31488	0.0020436	0.16246	-1.3553
C7orf42	0.551026	42.148	3.31364	0.00205057	0.16246	-1.3582
MYO18A	0.638279	40.5525	3.31328	0.00205264	0.16246	-1.35907
FBXW11	0.469442	42.2398	3.31116	0.00206463	0.162558	-1.36403
DVL2	0.719946	42.5929	3.30994	0.0020716	0.162558	-1.3669
B4GALT5	0.801928	18.4676	3.3058	0.0020954	0.163132	-1.37664
SLC3A2	0.64972	39.2311	3.30455	0.0021026	0.163132	-1.37956
PHRF1	0.527993	50.0605	3.30232	0.00211555	0.163132	-1.38479
GPATCH3	0.649688	49.5184	3.30111	0.00212263	0.163132	-1.38764
CYP2R1	-0.367768	27.9336	-3.29748	0.00214389	0.163132	-1.39613
XAB2	1.0256	47.4879	3.29665	0.00214885	0.163132	-1.3981
KIAA0090	0.578162	34.9823	3.2956	0.00215503	0.163132	-1.40055
LOC100507769	-0.646986	25.287	-3.29378	0.00216584	0.163132	-1.40481
XRCC4	-0.607518	36.0415	-3.29308	0.00217001	0.163132	-1.40645
ZSCAN22	0.88163	45.7926	3.29117	0.00218145	0.163132	-1.41093
CSNK2A2	0.764213	35.0904	3.29069	0.00218433	0.163132	-1.41205
TMEM176A	-0.980116	6.1946	-3.28919	0.00219336	0.163132	-1.41557
GBF1	0.561089	38.274	3.28902	0.0021944	0.163132	-1.41597
CYP20A1	0.561702	36.8245	3.2839	0.0022255	0.163922	-1.42796
PTP4A3	-0.891939	27.2454	-3.28301	0.00223091	0.163922	-1.43002
NBAS	0.71063	46.8044	3.28287	0.00223181	0.163922	-1.43037
TPP1	0.364571	30.0155	3.27902	0.00225548	0.164347	-1.43935
SNRNP70	0.787147	50.9374	3.27568	0.00227624	0.164347	-1.44716
REM2	-0.717547	26.897	-3.27517	0.00227948	0.164347	-1.44837
XLOC_l2_011872	-0.980155	39.4268	-3.27476	0.00228201	0.164347	-1.44931
NOL11	0.590366	37.749	3.27463	0.00228284	0.164347	-1.44963
MRPL22	-0.533537	26.7759	-3.2717	0.00230128	0.164347	-1.45647
CTBS	-0.562593	39.4487	-3.27086	0.00230658	0.164347	-1.45843
TBC1D20	0.772195	33.2048	3.26759	0.00232735	0.164347	-1.46607
USP11	0.675099	34.7411	3.26574	0.00233915	0.164347	-1.47037
TICAM1	0.516522	39.803	3.26543	0.00234113	0.164347	-1.47109
UBQLN4	0.828578	43.0282	3.26515	0.00234292	0.164347	-1.47174
ZNF404	0.655519	21.3054	3.26479	0.00234529	0.164347	-1.4726
PKN1	0.681753	41.7629	3.26036	0.00237389	0.164347	-1.48292
XLOC_005429	-0.413902	15.4888	-3.25888	0.00238351	0.164347	-1.48637
XLOC_l2_009571	-0.604767	21.8197	-3.25688	0.00239659	0.164347	-1.49102
RPL23AP7	-0.646546	35.8748	-3.25647	0.00239934	0.164347	-1.492
FBXO28	0.386932	26.2183	3.25628	0.00240058	0.164347	-1.49244
WDR3	0.439235	27.1664	3.25611	0.00240168	0.164347	-1.49283
CDH5	-1.11332	51.1408	-3.25404	0.00241532	0.164347	-1.49765
PRDM10	0.464485	21.954	3.25384	0.00241661	0.164347	-1.4981
ANKRD40	0.601058	33.5947	3.25117	0.00243436	0.164491	-1.50433
GRAMD1C	-0.653059	13.4106	-3.24905	0.00244847	0.164491	-1.50925
UBASH3B	0.620034	26.1087	3.24904	0.0024486	0.164491	-1.5093
DDX39A	0.578077	58.3414	3.24815	0.00245455	0.164491	-1.51136
ZBTB7A	0.73887	40.6008	3.24603	0.00246877	0.164842	-1.51628
PAX9	-0.751907	40.2596	-3.23641	0.00253454	0.16862	-1.53865
DPM1	-0.400576	29.2903	-3.2349	0.002545	0.168705	-1.54215
GOLGA6L7P	-0.77773	25.9191	-3.23355	0.0025544	0.168719	-1.54529
AARS	0.614319	30.2829	3.23175	0.00256697	0.168809	-1.54946
LOC100506428	-0.792457	30.6999	-3.23001	0.0025792	0.168809	-1.55351
TRAF6	0.683621	45.3996	3.22942	0.00258334	0.168809	-1.55487
XLOC_000914	-1.01934	50.9235	-3.22484	0.00261577	0.169528	-1.56548
DGCR14	0.772607	26.6975	3.22277	0.0026306	0.169528	-1.57029
RNF26	0.598596	65.4667	3.22264	0.00263154	0.169528	-1.57059
IGLON5	-0.958676	36.9247	-3.22058	0.00264633	0.169528	-1.57536
HNRNPH3	0.476432	30.1922	3.2197	0.00265267	0.169528	-1.5774
POLH	0.742209	35.9437	3.21912	0.00265688	0.169528	-1.57874
TBC1D13	0.683393	54.9706	3.21883	0.00265897	0.169528	-1.57941
FUBP1	0.539112	38.5003	3.2169	0.00267297	0.169831	-1.58388
HNRNPA0	0.506475	19.789	3.21495	0.00268721	0.170147	-1.58839
LOC388210	-0.49841	21.3852	-3.21295	0.00270187	0.170487	-1.59302
BTBD9	0.511337	38.4414	3.21003	0.00272341	0.171258	-1.59977
RRAGA	0.626033	62.0007	3.20663	0.00274876	0.171857	-1.60765
MRPS5	0.486544	53.5156	3.20624	0.00275166	0.171857	-1.60854
SNAR-G1	-1.00645	22.8889	-3.20366	0.00277104	0.172481	-1.61451
LOC100130924	-1.06002	37.2061	-3.20196	0.00278385	0.172693	-1.61843
TSPEAR	-0.952568	15.4056	-3.19922	0.00280462	0.173242	-1.62475
AATF	0.618682	59.2975	3.1964	0.00282619	0.173242	-1.63126
OR2AG1	-1.11403	39.784	-3.19561	0.00283225	0.173242	-1.63308
CAD	0.530147	33.3869	3.19495	0.00283737	0.173242	-1.63461
AKAP13	0.536623	29.4307	3.19462	0.00283988	0.173242	-1.63537
XLOC_007598	-0.904199	25.6745	-3.18886	0.0028846	0.174528	-1.64864
ELAC2	0.611656	40.7826	3.18813	0.00289032	0.174528	-1.65033
MAP2K4	-0.469449	30.6708	-3.18807	0.00289084	0.174528	-1.65048
LAMP1	0.498064	50.7626	3.18602	0.00290694	0.174528	-1.6552
FARSB	0.654256	40.1369	3.18582	0.00290848	0.174528	-1.65565
SEC31A	0.538081	44.7841	3.18298	0.00293095	0.175058	-1.66218
PANX2	-0.704797	28.4639	-3.1823	0.00293638	0.175058	-1.66376
ZNF264	0.562054	27.4338	3.1772	0.0029772	0.176449	-1.67548
STIM1	0.708344	55.734	3.17699	0.00297893	0.176449	-1.67598
NSD1	0.552067	31.5877	3.17272	0.00301357	0.176985	-1.6858
MRPS18B	0.553843	42.1177	3.17175	0.00302144	0.176985	-1.68801
PLIN5	-0.728596	19.7273	-3.17138	0.00302453	0.176985	-1.68888
VKORC1L1	0.604061	25.0883	3.17102	0.00302747	0.176985	-1.6897
IGSF8	0.622735	51.4821	3.16892	0.0030447	0.176985	-1.69452
HNRNPU	0.446909	40.0864	3.1667	0.00306307	0.176985	-1.69963
CLPTM1L	0.532145	55.9012	3.16649	0.00306477	0.176985	-1.7001
NIT1	0.862286	50.013	3.16474	0.00307928	0.176985	-1.70411
RNF6	0.448238	16.1134	3.16246	0.00309837	0.176985	-1.70936
XLOC_007800	-0.749698	17.5041	-3.1611	0.00310972	0.176985	-1.71247
EFCAB2	0.834415	22.8836	3.16096	0.00311095	0.176985	-1.7128
GMPS	0.560367	58.1131	3.15998	0.00311917	0.176985	-1.71504
SNTB1	0.680595	30.247	3.15861	0.00313074	0.176985	-1.71818
BAHD1	0.574982	47.1157	3.15851	0.00313154	0.176985	-1.7184
TAF5	0.834646	37.328	3.15839	0.00313256	0.176985	-1.71868
EIF1AD	0.566347	49.7857	3.15542	0.0031578	0.177717	-1.72549
PTBP1	0.588155	29.1365	3.15428	0.00316751	0.177717	-1.7281
LOC100509490	-0.655314	25.5165	-3.15346	0.00317456	0.177717	-1.72998
UBE2L3	0.503935	62.4205	3.14797	0.00322195	0.178798	-1.74256
LOC100129250	-0.707817	33.4961	-3.14789	0.0032226	0.178798	-1.74273
CCDC77	0.564094	33.4032	3.14784	0.00322307	0.178798	-1.74285
QSER1	0.52848	22.442	3.14636	0.00323594	0.178971	-1.74623
METTL11A	0.584748	43.0781	3.14237	0.00327095	0.18019	-1.75537
XLOC_013547	-0.601083	20.1965	-3.1377	0.00331238	0.18019	-1.76605
MTA2	0.55082	51.538	3.1374	0.00331501	0.18019	-1.76672
POLG	0.491583	55.9338	3.13651	0.00332296	0.18019	-1.76875
MAGED2	0.748354	39.5821	3.13504	0.0033362	0.18019	-1.77212
SNORA49	-0.518766	34.0397	-3.1347	0.0033392	0.18019	-1.77288
ZNF154	0.792078	19.2621	3.13407	0.00334491	0.18019	-1.77434
ZNF259P1	0.685969	42.3786	3.13395	0.00334599	0.18019	-1.77461
PWRN2	-0.432237	11.349	-3.13391	0.00334631	0.18019	-1.77469
BMP8B	-0.458753	39.2285	-3.13111	0.00337161	0.181022	-1.78108
RNASEH2A	0.58484	66.8731	3.125	0.0034275	0.183042	-1.79502
PPID	0.452653	33.3445	3.12482	0.00342917	0.183042	-1.79544
SURF6	0.639673	38.9791	3.12012	0.00347272	0.184829	-1.80614
ADIPOR2	0.634686	65.3079	3.11828	0.00348995	0.185209	-1.81033
CALR	0.63471	53.2164	3.11644	0.00350723	0.185566	-1.81452
GRWD1	0.434188	42.0335	3.11541	0.00351689	0.185566	-1.81685
AP3B1	0.772397	54.8193	3.11345	0.00353543	0.18601	-1.82131
GMFG	-0.572008	54.0061	-3.11137	0.00355521	0.186517	-1.82604
SLC4A1AP	0.51929	43.5685	3.10919	0.0035761	0.187078	-1.83101
RBM28	0.655548	56.3891	3.10576	0.0036092	0.188248	-1.83881
LOC100505933	-0.937688	35.6907	-3.0988	0.00367709	0.188248	-1.85461
ILF3	0.43308	36.0802	3.09871	0.00367799	0.188248	-1.85482
NGRN	0.832809	43.5051	3.09696	0.0036952	0.188248	-1.85877
XLOC_006025	-0.493021	18.9378	-3.09688	0.00369605	0.188248	-1.85897
EIF5B	0.511802	38.984	3.09638	0.00370095	0.188248	-1.86009
MCM3AP	0.570159	57.8247	3.0947	0.00371765	0.188248	-1.8639
TULP4	0.585983	26.4635	3.09461	0.00371853	0.188248	-1.8641
MTPN	0.370933	23.5461	3.09456	0.0037191	0.188248	-1.86423
CASP2	0.499293	37.8593	3.09438	0.00372081	0.188248	-1.86462
DAAM1	0.727885	24.2334	3.09374	0.00372721	0.188248	-1.86608
RCC2	0.512935	31.7765	3.09314	0.00373325	0.188248	-1.86745
LHFPL5	-0.406293	11.8248	-3.09166	0.00374799	0.188248	-1.87079
SLC35A4	0.713513	55.4458	3.09146	0.00374998	0.188248	-1.87124
FSD1L	0.628129	36.098	3.09124	0.00375225	0.188248	-1.87175
PRPF18	-0.483334	44.0195	-3.08872	0.00377759	0.188471	-1.87746
COLQ	-0.871342	24.0685	-3.08863	0.00377853	0.188471	-1.87767
HS6ST1	0.678591	32.1614	3.08774	0.00378748	0.188471	-1.87967
XLOC_l2_002355	-0.928794	36.2808	-3.0858	0.00380724	0.188916	-1.88408
ITGAL	0.653341	39.4162	3.08484	0.00381701	0.188916	-1.88625
LAGE3	0.566052	52.0021	3.08356	0.00383006	0.189052	-1.88914
SLC17A5	0.530002	37.6274	3.0798	0.00386873	0.190396	-1.89764
CD58	-0.61536	34.44	-3.07869	0.00388024	0.190396	-1.90016
XLOC_l2_009947	-0.795934	18.952	-3.0779	0.00388839	0.190396	-1.90194
XLOC_009681	0.745609	24.6764	3.0759	0.00390921	0.190587	-1.90646
DYNC1I2	0.524111	49.5922	3.07432	0.00392573	0.190587	-1.91003
CHAMP1	0.549476	34.132	3.07322	0.00393732	0.190587	-1.91253
FAM76A	0.471901	35.0016	3.07215	0.00394857	0.190587	-1.91494
ALG6	0.390122	33.6198	3.07168	0.00395346	0.190587	-1.91599
ATXN7L2	-0.472268	16.3409	-3.07158	0.00395457	0.190587	-1.91623
CCNH	-0.615583	44.0597	-3.06939	0.00397766	0.191198	-1.92116
USP32	-0.48595	29.1533	-3.06581	0.00401589	0.192472	-1.92925
ALAS1	0.647943	35.4623	3.06494	0.00402513	0.192472	-1.9312
ADAM12	-0.529354	21.5507	-3.06318	0.00404405	0.192503	-1.93517
XLOC_l2_014050	0.51334	28.8119	3.06293	0.00404674	0.192503	-1.93573
CASS4	-0.717419	23.3472	-3.05967	0.00408203	0.193426	-1.94308
PSMC4	0.571957	62.0174	3.0592	0.00408722	0.193426	-1.94415
BBX	0.513578	40.8777	3.05808	0.00409937	0.193503	-1.94667
PDIA3	0.620451	43.3266	3.05678	0.00411361	0.193677	-1.9496
NOBOX	-0.321816	22.5179	-3.0554	0.0041287	0.193689	-1.9527
ATP6V1H	0.786162	31.9788	3.05457	0.0041378	0.193689	-1.95456
LOC100507305	-0.488934	18.259	-3.05386	0.0041457	0.193689	-1.95618
CCNL2	-0.462051	36.9155	-3.05186	0.00416781	0.193689	-1.96068
PREP	0.583267	40.6236	3.0513	0.004174	0.193689	-1.96193
CSTF2T	0.481539	28.3355	3.05101	0.00417716	0.193689	-1.96257
RPL26L1	-0.569517	28.2993	-3.04764	0.00421485	0.193918	-1.97017
LAMC3	-0.477722	12.2623	-3.04659	0.00422658	0.193918	-1.97252
CCND3	0.751887	47.2216	3.04633	0.00422948	0.193918	-1.9731
INTS9	0.632567	69.5603	3.04519	0.00424235	0.193918	-1.97567
XPNPEP2	0.730083	39.5566	3.0445	0.00425007	0.193918	-1.97721
TMEM176B	-0.898106	5.66382	-3.04404	0.00425536	0.193918	-1.97826
UPRT	0.463727	25.0736	3.04375	0.00425861	0.193918	-1.97891
NIPSNAP1	0.661736	53.5179	3.04253	0.00427235	0.193918	-1.98163
KLF2	0.500999	49.6706	3.03875	0.00431554	0.193918	-1.99014
TARS	0.648803	36.2206	3.03847	0.00431874	0.193918	-1.99077
CORO6	-0.528305	32.913	-3.03838	0.0043197	0.193918	-1.99095
LINC00467	-0.623868	30.9683	-3.03734	0.00433165	0.193918	-1.99329
CMTM2	-0.733127	32.5243	-3.0372	0.00433328	0.193918	-1.99361
XRCC6	0.455269	58.235	3.03689	0.00433688	0.193918	-1.99431
POMT2	0.619642	36.9918	3.03521	0.00435625	0.193918	-1.99808
CALM1	0.624999	32.4465	3.03454	0.00436395	0.193918	-1.99957
LOC257152	-0.573342	34.8175	-3.03423	0.00436755	0.193918	-2.00027
KLC1	0.745012	53.6482	3.03383	0.00437218	0.193918	-2.00117
ANO9	-0.629963	29.6038	-3.03152	0.00439906	0.19464	-2.00635
ARL2	0.59702	44.1063	3.03035	0.00441277	0.194777	-2.00898
RANBP3	0.522906	56.4666	3.02929	0.00442517	0.194856	-2.01135
NDUFC1	0.440726	52.3227	3.0262	0.00446153	0.195418	-2.01827
FRY	-0.446586	25.3913	-3.02549	0.0044699	0.195418	-2.01985
PRPF8	0.401779	35.998	3.02533	0.00447186	0.195418	-2.02022
TP53BP2	0.45878	21.6717	3.0246	0.0044805	0.195418	-2.02186
FAM58A	-0.416075	44.1509	-3.02123	0.00452062	0.195805	-2.02939
XLOC_008504	-0.403883	17.7025	-3.02104	0.00452291	0.195805	-2.02982
CIRH1A	0.564872	46.958	3.02091	0.0045244	0.195805	-2.0301
CTNNBL1	0.4782	55.2235	3.02028	0.00453203	0.195805	-2.03152
CTU1	0.528867	45.9151	3.01885	0.00454923	0.195967	-2.03472
LOC286367	-0.865662	26.7607	-3.01819	0.00455713	0.195967	-2.03619
TMEM229B	0.582772	33.4211	3.0166	0.00457632	0.196084	-2.03974
XLOC_l2_009439	-0.553623	17.8076	-3.01485	0.00459754	0.196084	-2.04365
XLOC_l2_005352	-0.92165	17.0496	-3.01389	0.00460921	0.196084	-2.04579
GLT25D1	0.590013	34.6789	3.01195	0.00463302	0.196084	-2.05015
DHX8	0.401133	44.68	3.01168	0.00463622	0.196084	-2.05073
SH2B1	0.872903	49.2139	3.01163	0.00463685	0.196084	-2.05085
HNRNPR	0.365645	28.8898	3.01099	0.00464469	0.196084	-2.05227
ARHGEF15	-0.496265	15.4634	-3.01095	0.00464527	0.196084	-2.05238
LINC00265	-0.43554	29.5679	-3.00677	0.00469675	0.197802	-2.06169
NOC2L	0.587197	38.9259	3.00445	0.00472568	0.198421	-2.06688
FAM180A	-0.361806	12.7034	-3.00386	0.00473306	0.198421	-2.06819
HHLA1	-0.952379	41.5152	-3.00165	0.00476071	0.198941	-2.07311
HPS5	0.559898	39.6168	3.00092	0.00476991	0.198941	-2.07474
CUL1	0.670152	32.0166	2.99992	0.0047825	0.198941	-2.07697
XLOC_009152	-0.549796	31.3284	-2.99942	0.00478879	0.198941	-2.07808
PYGO2	0.5068	43.4931	2.997	0.00481944	0.19961	-2.08347
C11orf24	0.53222	46.0445	2.99471	0.00484861	0.19961	-2.08856
XLOC_000294	0.853205	38.2258	2.99396	0.00485829	0.19961	-2.09025
SRSF4	0.453984	55.6681	2.9915	0.0048898	0.19961	-2.09571
PREPL	0.487187	25.5938	2.99082	0.00489865	0.19961	-2.09723
FANCE	0.60197	47.4014	2.9907	0.00490023	0.19961	-2.09751
ZNF512	0.693279	40.2643	2.9901	0.00490787	0.19961	-2.09882
LRRC47	0.486359	40.9518	2.98924	0.00491909	0.19961	-2.10075
YWHAB	0.42228	54.0367	2.988	0.0049352	0.19961	-2.10351
RPS6KA5	-0.580507	28.1876	-2.98777	0.00493812	0.19961	-2.10401
LOC100506983	-0.440525	15.2828	-2.98617	0.00495901	0.19961	-2.10757
LOC100507563	-0.841272	49.4649	-2.98545	0.00496835	0.19961	-2.10916
ZBTB45	0.478251	69.2505	2.98376	0.00499052	0.19961	-2.11292
TCOF1	0.389295	30.9099	2.98284	0.00500264	0.19961	-2.11497
C17orf53	-0.479564	24.4003	-2.9828	0.00500313	0.19961	-2.11505
ARL8A	0.384207	52.6109	2.98278	0.00500337	0.19961	-2.11509
ELF4	0.392384	40.9249	2.98264	0.00500525	0.19961	-2.11541
GPR77	-0.743124	28.099	-2.9824	0.00500847	0.19961	-2.11595
LOC728323	-0.589732	27.0225	-2.98217	0.00501145	0.19961	-2.11645
SREBF2	0.847121	39.5293	2.98026	0.00503674	0.200028	-2.1207
ZNF362	0.681083	57.4832	2.97931	0.00504928	0.200028	-2.1228
PCYOX1	0.530684	31.5489	2.97775	0.0050701	0.200028	-2.12627
COL28A1	-0.66807	26.0668	-2.97665	0.00508472	0.200028	-2.1287
GLG1	0.616334	40.4443	2.97614	0.00509161	0.200028	-2.12984
AKR1C1	-0.84834	24.8252	-2.97605	0.00509282	0.200028	-2.13004
TEX101	-0.81062	23.3386	-2.97513	0.00510515	0.200028	-2.13208
ACOXL	-0.906578	19.0752	-2.97483	0.00510909	0.200028	-2.13273
MSN	0.364889	36.2937	2.97088	0.00516247	0.201688	-2.1415
XLOC_003262	-0.764329	17.9248	-2.96984	0.00517657	0.201809	-2.14381
RECK	0.368879	13.3869	2.96889	0.00518952	0.201886	-2.14591
PRR12	0.486215	29.8831	2.96597	0.00522937	0.203006	-2.15237
NFKBIB	0.578957	43.2802	2.96328	0.0052665	0.204016	-2.15833
LOC284408	0.59115	30.0207	2.96116	0.00529577	0.204303	-2.16301
SUFU	0.47444	38.2541	2.96114	0.00529616	0.204303	-2.16307
WDR92	0.556226	42.6106	2.95846	0.00533348	0.205311	-2.16899
C14orf1	0.694979	36.8665	2.95592	0.00536905	0.206248	-2.1746
CD3E	0.792482	35.9606	2.95353	0.00540279	0.207111	-2.17988
TM9SF2	0.496861	35.7313	2.95172	0.00542849	0.207513	-2.18388
XLOC_000111	-0.429131	11.8603	-2.9512	0.0054359	0.207513	-2.18503
KIAA0947	0.519387	21.6499	2.95025	0.00544938	0.207596	-2.18712
XLOC_011183	0.533824	36.0801	2.9494	0.00546145	0.207626	-2.18898
UBAP2L	0.423978	37.8222	2.94842	0.00547551	0.20773	-2.19115
CTSK	-0.831926	34.142	-2.94684	0.00549819	0.20816	-2.19463
PHB	0.478934	50.3015	2.946	0.00551031	0.20819	-2.19649
LOC284014	-0.526191	32.1561	-2.94313	0.0055519	0.209148	-2.20283
XLOC_009876	0.825991	23.956	2.94268	0.00555844	0.209148	-2.20382
FAM186B	-0.363562	19.913	-2.94085	0.00558496	0.209716	-2.20783
XLOC_l2_009312	0.823497	37.6278	2.93534	0.00566601	0.211591	-2.21997
SMG8	0.591433	36.1464	2.93515	0.00566879	0.211591	-2.22039
TMEM39B	0.840015	74.7861	2.93414	0.00568372	0.211591	-2.2226
CTSD	0.603292	38.1787	2.93398	0.00568609	0.211591	-2.22295
CAPN1	0.621522	38.1224	2.93355	0.00569252	0.211591	-2.2239
APIP	-0.827258	34.8286	-2.93033	0.0057406	0.212696	-2.23099
PEX11B	0.704072	64.1315	2.92827	0.00577149	0.212696	-2.23551
MTMR2	0.606516	38.4254	2.92825	0.00577187	0.212696	-2.23557
PPP5C	0.791003	29.242	2.92817	0.00577308	0.212696	-2.23574
POLDIP2	0.666964	78.1107	2.9277	0.00578017	0.212696	-2.23678
ANKS1A	0.467839	38.5289	2.92497	0.00582133	0.213725	-2.24275
EVL	0.56974	49.7344	2.92395	0.00583688	0.213725	-2.245
CRIPT	-0.66154	34.4332	-2.92355	0.00584306	0.213725	-2.24589
XPNPEP1	0.713587	35.0699	2.92059	0.00588822	0.214816	-2.25237
FKBP15	0.534575	38.3462	2.92007	0.00589627	0.214816	-2.25352
GARS	0.775236	37.3646	2.91895	0.00591346	0.215016	-2.25598
MAPK1IP1L	0.45921	53.0424	2.91775	0.005932	0.215107	-2.25861
IWS1	0.589207	36.3728	2.91671	0.00594798	0.215107	-2.26087
SLC4A2	0.789157	33.2092	2.91651	0.0059511	0.215107	-2.26132
MSL3	0.625841	36.4844	2.91442	0.00598367	0.215859	-2.26591
C8orf44-SGK3	-0.559663	50.5991	-2.91329	0.00600127	0.216069	-2.26838
C12orf34	0.783168	38.6688	2.91216	0.00601891	0.21628	-2.27085
SAFB	0.542288	43.3429	2.91135	0.00603164	0.216314	-2.27263
XLOC_006805	-0.495632	33.2435	-2.91045	0.00604569	0.216336	-2.27459
TFG	0.566675	39.4851	2.90973	0.00605698	0.216336	-2.27616
FLJ37638	-0.815237	16.763	-2.90831	0.00607953	0.216336	-2.27929
LIMA1	0.530027	20.2342	2.90713	0.00609811	0.216336	-2.28186
CEP250	0.459395	41.8775	2.90657	0.00610697	0.216336	-2.28308
TSPYL4	0.398072	24.2592	2.90638	0.0061101	0.216336	-2.28351
SRRM3	-0.523325	24.0414	-2.90609	0.0061147	0.216336	-2.28414
XLOC_l2_008078	-0.635476	34.7121	-2.90142	0.00618931	0.218274	-2.29435
XLOC_003364	-0.659537	23.2466	-2.89861	0.00623459	0.218274	-2.30048
RPS16P5	-0.447073	15.3018	-2.89838	0.00623836	0.218274	-2.30099
STIP1	0.634663	34.4439	2.89785	0.00624691	0.218274	-2.30214
NFKB1	0.674119	55.4328	2.89721	0.00625732	0.218274	-2.30354
APEH	0.724746	60.4544	2.89696	0.0062614	0.218274	-2.30409
RB1	0.353764	13.8558	2.89672	0.00626528	0.218274	-2.30461
KIF13B	0.505103	30.3272	2.89524	0.00628936	0.218274	-2.30784
PSMB1	-0.572548	55.4287	-2.8945	0.00630146	0.218274	-2.30946
STAMBP	-0.459697	38.948	-2.89444	0.00630246	0.218274	-2.30959
XLOC_000291	-0.773676	28.891	-2.89391	0.00631107	0.218274	-2.31074
GPR152	-0.437264	33.4484	-2.89385	0.00631213	0.218274	-2.31088
ZHX2	0.780849	31.0051	2.89178	0.0063461	0.218693	-2.31539
PICK1	-0.563358	38.5377	-2.89155	0.00634978	0.218693	-2.31588
HARS	0.549374	53.9351	2.89094	0.00635998	0.218693	-2.31723
ZBTB39	0.686721	38.8279	2.888	0.00640854	0.219706	-2.32363
TCP10L	0.947344	46.9813	2.88771	0.00641337	0.219706	-2.32426
KHDRBS1	0.38917	33.2919	2.88631	0.00643665	0.220009	-2.32731
XLOC_012763	-0.556193	21.5302	-2.88574	0.00644618	0.220009	-2.32855
XLOC_010908	-0.708574	39.2066	-2.88463	0.00646468	0.220231	-2.33096
PFN2	-0.770187	32.362	-2.88319	0.00648892	0.220293	-2.33411
PDCD7	0.350212	41.5489	2.88309	0.00649051	0.220293	-2.33432
STARD10	-0.715919	25.6531	-2.8822	0.00650551	0.220334	-2.33626
BAG5	0.601655	42.8815	2.8816	0.00651571	0.220334	-2.33757
XLOC_012452	-0.491771	19.3135	-2.88071	0.00653067	0.220434	-2.3395
SRCAP	0.69392	39.3391	2.8781	0.00657488	0.221494	-2.34517
LOC100505994	-0.489927	19.1534	-2.87652	0.00660186	0.221494	-2.34862
TNFRSF12A	-0.757749	25.0197	-2.87591	0.00661238	0.221494	-2.34995
MSRA	0.624994	35.5106	2.87558	0.00661796	0.221494	-2.35066
XLOC_l2_008008	-0.4576	15.6969	-2.87401	0.00664482	0.221494	-2.35407
MT1M	0.755939	17.4088	2.87342	0.00665495	0.221494	-2.35535
COMMD10	-0.578601	27.4571	-2.87332	0.00665674	0.221494	-2.35557
TCHP	0.596499	38.4443	2.87321	0.00665858	0.221494	-2.35581
TMEM97	0.706873	23.3912	2.87125	0.00669238	0.221931	-2.36006
PPFIBP2	0.834968	21.3957	2.87093	0.00669805	0.221931	-2.36077
FLJ44342	-0.57012	34.4243	-2.87035	0.00670796	0.221931	-2.36202
NPEPL1	-0.535954	32.5284	-2.86901	0.0067313	0.222195	-2.36493
XLOC_001496	-0.468071	18.7348	-2.8685	0.00674016	0.222195	-2.36604
PIP5K1C	0.587216	30.4748	2.86456	0.006809	0.224062	-2.37458
PNPLA8	-0.587499	44.3347	-2.86338	0.0068299	0.224169	-2.37715
VDAC1	0.465984	41.7438	2.8625	0.00684534	0.224169	-2.37905
ECH1	0.636093	57.0185	2.8623	0.00684885	0.224169	-2.37948
QRICH2	0.786625	37.7408	2.85711	0.00694114	0.226785	-2.39072
PSAT1	0.715451	18.3239	2.85474	0.00698369	0.227752	-2.39586
CASP7	0.523795	16.2262	2.85408	0.00699554	0.227752	-2.39728
XLOC_012359	-0.683096	44.1601	-2.85173	0.00703807	0.22803	-2.40237
RPUSD2	0.575098	54.2966	2.85169	0.00703887	0.22803	-2.40246
VPS35	0.539086	58.3054	2.84996	0.00707017	0.22803	-2.40619
LOC143286	-0.591819	25.3961	-2.84982	0.00707276	0.22803	-2.4065
ZNF419	0.412307	28.0458	2.84955	0.00707776	0.22803	-2.40709
MAP1LC3A	-0.422818	15.0954	-2.84807	0.00710473	0.22803	-2.41028
ACACA	0.585978	27.036	2.84783	0.00710913	0.22803	-2.4108
ATXN2L	0.383772	39.4155	2.84757	0.00711395	0.22803	-2.41137
ZNF667	-0.424489	37.0439	-2.84746	0.00711584	0.22803	-2.4116
GCN1L1	0.526241	46.0139	2.84459	0.00716858	0.22912	-2.41779
XLOC_011429	-0.579574	22.4202	-2.84425	0.0071748	0.22912	-2.41852
MGC23270	0.766914	24.8896	2.84164	0.00722319	0.230264	-2.42416
HIRIP3	0.498881	37.2998	2.84056	0.00724334	0.230506	-2.4265
ATXN1L	0.360676	21.0276	2.83862	0.00727946	0.231255	-2.43068
MRPL23-AS1	1.03795	18.0008	2.8373	0.00730429	0.231643	-2.43353
NCAPD3	0.558707	25.9621	2.83634	0.00732226	0.231813	-2.4356
TLR7	0.510309	16.1974	2.83405	0.00736547	0.23254	-2.44053
LOC100134868	-0.497595	37.6239	-2.83368	0.00737251	0.23254	-2.44133
TMEM203	0.464357	41.3721	2.83311	0.00738323	0.23254	-2.44255
SPRR2F	-0.656697	36.0657	-2.83187	0.00740686	0.232885	-2.44523
LOC100132481	-0.774081	44.9977	-2.82768	0.00748683	0.234997	-2.45424
TLR3	0.739215	20.6427	2.82507	0.0075371	0.23512	-2.45986
C2orf56	-0.487106	45.0966	-2.82429	0.00755215	0.23512	-2.46153
ND5	0.611187	28.121	2.82275	0.00758207	0.23512	-2.46484
RPL23	-0.486481	35.5343	-2.82219	0.0075929	0.23512	-2.46604
FIP1L1	0.499982	50.353	2.82175	0.00760163	0.23512	-2.467
XLOC_006725	0.610302	18.4265	2.81955	0.00764452	0.23512	-2.47172
B4GALT4	0.608905	27.8536	2.81928	0.00764972	0.23512	-2.47229
NES	-0.362629	13.5958	-2.81895	0.00765628	0.23512	-2.47301
XLOC_011379	-0.729397	17.6505	-2.81891	0.00765711	0.23512	-2.4731
XLOC_002652	0.539246	36.8314	2.8189	0.00765715	0.23512	-2.47311
CORO1A	0.437889	57.904	2.81856	0.00766398	0.23512	-2.47385
C5orf51	0.578928	42.0808	2.81811	0.00767278	0.23512	-2.47482
C14orf2	-0.473231	32.3882	-2.81807	0.00767348	0.23512	-2.47489
MAFK	0.746403	47.7099	2.81762	0.00768229	0.23512	-2.47586
ARMCX3	0.703853	39.7532	2.8176	0.00768282	0.23512	-2.47591
FAF1	0.538394	57.4059	2.81525	0.00772922	0.236045	-2.48096
LDOC1L	0.656338	24.3354	2.81476	0.00773875	0.236045	-2.482
SLC5A2	-0.424377	21.3616	-2.81371	0.00775961	0.236288	-2.48425
SLC22A7	-0.915634	34.9107	-2.81101	0.00781351	0.237414	-2.49005
XLOC_013835	-0.772194	26.1644	-2.80838	0.00786611	0.237414	-2.49568
MRPS35	0.355378	29.1618	2.80802	0.00787334	0.237414	-2.49645
CAMKK1	-0.587449	23.1182	-2.80801	0.00787359	0.237414	-2.49647
TAF4	0.360783	16.6841	2.8072	0.00789	0.237414	-2.49822
CNOT7	0.378046	29.3383	2.80715	0.00789099	0.237414	-2.49832
ZBTB38	0.70804	31.4994	2.80686	0.00789678	0.237414	-2.49894
DPM3	-0.363356	31.9173	-2.8067	0.00790002	0.237414	-2.49928
TERT	-0.883958	51.7478	-2.80405	0.00795358	0.238633	-2.50494
DBIL5P2	-0.464664	34.3102	-2.80338	0.00796738	0.238658	-2.5064
PPT2	0.834094	37.3576	2.8021	0.00799343	0.238952	-2.50913
SERF2	0.496481	54.5157	2.80162	0.00800324	0.238952	-2.51016
GOSR1	0.475066	38.7864	2.79949	0.00804673	0.23986	-2.5147
SMEK1	0.462837	51.0457	2.79876	0.00806186	0.239922	-2.51627
ARID5B	0.554538	26.2234	2.79772	0.00808323	0.240169	-2.51849
FANCL	0.564967	26.5408	2.79474	0.00814501	0.241613	-2.52487
DHCR24	0.781531	23.1686	2.79354	0.00816982	0.241839	-2.52742
ITGAE	-0.537812	37.2374	-2.79289	0.00818334	0.241839	-2.5288
ATAD2B	0.485292	17.6501	2.79231	0.00819552	0.241839	-2.53005
ELN	-0.619932	30.018	-2.79151	0.00821226	0.241839	-2.53175
SF3B3	0.441081	31.9787	2.79092	0.00822468	0.241839	-2.53302
TTC27	0.495053	34.6806	2.79047	0.00823405	0.241839	-2.53397
PATZ1	0.709968	35.7455	2.78976	0.00824896	0.241839	-2.53549
SEC63	0.423326	28.8154	2.78933	0.00825799	0.241839	-2.5364
XLOC_003343	-0.608085	18.419	-2.7887	0.00827125	0.241842	-2.53775
SEC14L1	-0.307233	26.1426	-2.78738	0.00829918	0.242034	-2.54057
LOC550643	0.548923	26.6706	2.78714	0.00830418	0.242034	-2.54107
MARCKS	0.470821	22.9929	2.78568	0.0083351	0.242288	-2.54419
UBE2Z	0.460402	43.6228	2.78549	0.00833928	0.242288	-2.54461
TTF1	0.402383	40.2585	2.78377	0.00837569	0.242961	-2.54825
LEAP2	-0.501881	35.9065	-2.78303	0.00839157	0.243038	-2.54984
MCM2	0.735477	28.9788	2.78096	0.00843592	0.243346	-2.55425
LOC727993	-0.74225	29.1198	-2.78016	0.00845312	0.243346	-2.55596
LOC401357	-0.422538	26.1714	-2.78004	0.00845558	0.243346	-2.5562
EIF4G2	0.37989	34.3182	2.77962	0.00846477	0.243346	-2.55711
ARFGEF2	0.423481	25.6165	2.77889	0.00848047	0.243346	-2.55866
AMT	-0.566773	27.11	-2.77882	0.008482	0.243346	-2.55881
IER5	0.464667	29.8476	2.77822	0.00849497	0.243346	-2.56009
CTNNB1	0.559492	43.6152	2.77701	0.00852106	0.243713	-2.56266
COMMD8	-0.457447	18.3627	-2.77398	0.00858697	0.244512	-2.5691
LINC00327	-0.715699	26.2667	-2.7734	0.00859955	0.244512	-2.57033
XLOC_003289	-0.768472	24.8655	-2.77297	0.00860908	0.244512	-2.57126
LOC100652769	-0.738874	40.2628	-2.77277	0.00861329	0.244512	-2.57166
HSP90AB5P	0.757064	47.1528	2.77267	0.00861559	0.244512	-2.57189
XLOC_005132	-0.815608	33.4202	-2.76962	0.00868249	0.245652	-2.57836
LOC100652851	-0.547443	24.2432	-2.7685	0.00870735	0.245652	-2.58075
DDX54	0.525677	53.2408	2.7679	0.00872051	0.245652	-2.58201
EYA1	-0.386142	13.6456	-2.76785	0.00872175	0.245652	-2.58213
LOC646278	0.397713	39.0827	2.76704	0.00873963	0.245652	-2.58385
PRR19	0.812386	35.2559	2.76623	0.00875767	0.245652	-2.58557
TNFRSF19	-0.834486	35.7737	-2.76485	0.00878827	0.245652	-2.58849
RRP9	0.483904	45.0162	2.76472	0.0087911	0.245652	-2.58876
VGLL4	0.605835	37.0191	2.7642	0.00880284	0.245652	-2.58987
PTCD1	0.569684	61.8245	2.76389	0.00880976	0.245652	-2.59053
APOOL	0.574327	27.1808	2.76367	0.00881456	0.245652	-2.59099
C16orf47	-0.489451	19.8585	-2.76316	0.00882607	0.245652	-2.59208
GIMAP8	0.663896	34.1798	2.763	0.00882967	0.245652	-2.59242
SLC6A5	-0.379444	27.1922	-2.76135	0.0088667	0.246043	-2.59592
ZNF296	0.79226	42.0523	2.76118	0.00887051	0.246043	-2.59628
ITFG1	0.497508	42.2464	2.76037	0.00888871	0.246176	-2.59799
DCXR	0.652205	37.8836	2.75631	0.00898059	0.246461	-2.60659
ITPR3	0.578391	29.4801	2.75624	0.00898214	0.246461	-2.60673
NAA30	0.39922	22.0232	2.75604	0.00898669	0.246461	-2.60716
PRKCB	0.512953	39.8227	2.75587	0.00899066	0.246461	-2.60753
RWDD2A	-0.64786	31.0958	-2.75565	0.00899572	0.246461	-2.608
HARS2	0.495808	57.5941	2.7548	0.00901508	0.246461	-2.60979
TRAF3IP1	0.569015	31.3755	2.7547	0.00901731	0.246461	-2.61
TPI1	0.478066	66.1598	2.75449	0.00902201	0.246461	-2.61044
GRN	0.351118	31.9919	2.75438	0.00902461	0.246461	-2.61068
LOC646329	-0.580808	24.1066	-2.75355	0.00904352	0.246461	-2.61243
DPY19L1	0.691676	33.2501	2.75292	0.00905792	0.246461	-2.61376
GBAP1	0.473757	35.8084	2.75283	0.00906008	0.246461	-2.61396
SCAMP3	0.328559	51.2711	2.75116	0.00909851	0.246814	-2.6175
LSG1	0.641632	32.7667	2.7511	0.00909994	0.246814	-2.61763
SDHA	0.448282	49.6163	2.74783	0.00917542	0.248344	-2.62453
XLOC_l2_009184	-0.53852	32.2605	-2.74711	0.00919209	0.248344	-2.62605
SLC6A3	-0.50793	32.1341	-2.74658	0.00920459	0.248344	-2.62718
LOC401320	-0.477494	31.3473	-2.74632	0.00921044	0.248344	-2.62771
XLOC_004229	0.684496	26.4856	2.74426	0.00925865	0.248597	-2.63208
SYVN1	0.553242	41.3351	2.74384	0.0092685	0.248597	-2.63296
MIA3	0.462493	34.1312	2.74377	0.00926997	0.248597	-2.6331
PTPRA	0.492478	52.6652	2.7424	0.00930234	0.248597	-2.63601
UBE2Q2P2	0.598753	26.6013	2.74231	0.00930438	0.248597	-2.63619
SUCLG1	0.727161	49.988	2.742	0.00931175	0.248597	-2.63685
XLOC_007374	-0.4528	18.3738	-2.74114	0.00933193	0.248597	-2.63866
XLOC_l2_012415	-0.900798	36.4296	-2.74093	0.00933691	0.248597	-2.63911
SLC22A8	-0.405583	12.2114	-2.74073	0.00934168	0.248597	-2.63954
BTBD3	0.602321	27.5721	2.73987	0.00936176	0.248771	-2.64133
SBF1P1	0.743414	49.6528	2.73617	0.00944976	0.250592	-2.64914
ACO2	0.475751	60.1709	2.73584	0.00945758	0.250592	-2.64984
PIK3R6	-0.830472	28.0648	-2.73462	0.00948667	0.251	-2.6524
TBC1D9B	0.635781	39.9149	2.73333	0.00951776	0.251285	-2.65513
DOCK5	-0.379707	17.5869	-2.73066	0.00958206	0.251285	-2.66076
SALL3	-0.368563	27.3001	-2.73035	0.00958936	0.251285	-2.66139
GRPEL1	0.579253	63.2113	2.73028	0.00959113	0.251285	-2.66155
STARD8	0.477727	23.1562	2.73011	0.00959534	0.251285	-2.66191
SNRPN	0.558914	37.3343	2.7298	0.0096027	0.251285	-2.66255
VAV3	0.472524	31.7737	2.72947	0.00961082	0.251285	-2.66326
GSG1	-0.612233	45.2062	-2.72919	0.00961763	0.251285	-2.66385
SLC15A4	-0.55273	38.7381	-2.72826	0.00964003	0.251285	-2.66579
RNF38	0.540264	30.0809	2.72563	0.00970415	0.251285	-2.67133
GLB1	0.443192	35.2544	2.72549	0.00970755	0.251285	-2.67162
PSMC3IP	0.572846	32.3887	2.7246	0.0097294	0.251285	-2.6735
LOC100507015	-0.449062	18.3976	-2.72442	0.00973393	0.251285	-2.67388
MED12	0.552314	26.5064	2.72421	0.00973886	0.251285	-2.67431
SLC9A5	-0.646299	35.797	-2.7242	0.00973925	0.251285	-2.67434
RGAG4	0.739861	18.1258	2.72332	0.00976073	0.251285	-2.67618
ATP6V1E1	0.698164	63.913	2.72312	0.00976574	0.251285	-2.67661
PLEKHB2	0.440192	38.7034	2.72201	0.00979301	0.251285	-2.67893
PHLPP1	0.697276	25.8538	2.72191	0.00979547	0.251285	-2.67914
KRT18P55	-0.622445	32.4502	-2.72134	0.0098095	0.251285	-2.68034
TMEM189	0.553207	46.9	2.72117	0.00981374	0.251285	-2.6807
TMEM177	0.470296	29.9066	2.72068	0.00982577	0.251285	-2.68172
SYNJ2	-0.444984	21.5944	-2.72039	0.00983317	0.251285	-2.68235
LOC100128071	-0.520033	39.4088	-2.71963	0.00985184	0.251285	-2.68393
MOB3C	0.639639	37.1852	2.71962	0.00985218	0.251285	-2.68396
TH1L	0.550691	38.7265	2.71958	0.00985323	0.251285	-2.68405
C9orf139	-0.522567	27.2926	-2.71797	0.00989304	0.251511	-2.68742
FNDC3A	0.429983	32.659	2.71757	0.00990319	0.251511	-2.68827
LOC100507278	0.484386	26.8437	2.7171	0.00991478	0.251511	-2.68925
CCDC56	0.439136	50.0439	2.71652	0.00992914	0.251511	-2.69046
UBOX5	0.714669	36.8545	2.71647	0.00993059	0.251511	-2.69058
SNAP29	0.591314	35.2603	2.71571	0.00994955	0.251644	-2.69217
C17orf42	-0.39665	15.5902	-2.71399	0.00999249	0.252151	-2.69576
MKKS	-0.488644	38.778	-2.71283	0.0100216	0.252151	-2.69819
HSPBP1	0.647005	61.315	2.71273	0.0100244	0.252151	-2.69842
CHD4	0.501104	36.398	2.71272	0.0100245	0.252151	-2.69843
SSR3	-0.700274	33.8436	-2.71044	0.0100822	0.253256	-2.70322
DHCR7	0.826799	40.7093	2.70989	0.0100962	0.253259	-2.70437
C3orf54	-0.438326	50.5704	-2.70862	0.0101284	0.253489	-2.70703
SMARCA4	0.448089	46.2116	2.70844	0.0101329	0.253489	-2.7074
MVP	0.511325	54.0049	2.70788	0.0101471	0.253497	-2.70857
XLOC_010268	-0.74023	46.872	-2.7064	0.010185	0.254099	-2.71168
NOL10	0.474852	47.6193	2.70523	0.0102149	0.254499	-2.71412
XLOC_l2_001302	0.542897	30.7059	2.70407	0.0102446	0.254511	-2.71655
DOHH	0.612296	36.3639	2.70387	0.0102499	0.254511	-2.71698
XLOC_l2_010830	0.685038	35.3316	2.70359	0.0102569	0.254511	-2.71755
AMOT	0.933158	30.2069	2.70202	0.0102974	0.254697	-2.72083
ZNF267	-0.6961	33.4243	-2.7009	0.0103265	0.254697	-2.72319
NDRG1	0.526777	46.6992	2.70016	0.0103457	0.254697	-2.72473
IL1RAPL1	-0.526859	31.4643	-2.6999	0.0103524	0.254697	-2.72527
RASSF6	-0.579157	37.2874	-2.69854	0.0103878	0.254697	-2.72812
NPL	-0.501176	33.7027	-2.69831	0.0103936	0.254697	-2.72858
XLOC_000105	-0.520829	19.1326	-2.69754	0.0104138	0.254697	-2.7302
ZC3HC1	0.463657	46.0664	2.69735	0.0104186	0.254697	-2.73059
NLRP6	-0.705263	16.8362	-2.69691	0.0104301	0.254697	-2.73151
FAM120B	0.608948	46.7349	2.69663	0.0104375	0.254697	-2.7321
PWP2	0.526128	38.2005	2.69622	0.0104483	0.254697	-2.73296
SPIN2B	0.513973	34.1161	2.69557	0.0104653	0.254697	-2.73431
KAT5	0.623297	61.5624	2.69502	0.0104798	0.254697	-2.73547
C21orf88	-0.428901	38.5599	-2.69484	0.0104844	0.254697	-2.73583
ANO6	0.535425	20.528	2.69454	0.0104922	0.254697	-2.73646
PELP1	0.489301	46.8063	2.69353	0.0105189	0.254697	-2.73858
XLOC_003449	-0.867895	50.6303	-2.6935	0.0105196	0.254697	-2.73863
GALC	-0.51125	30.1699	-2.69331	0.0105248	0.254697	-2.73904
XLOC_013047	-0.37372	11.3725	-2.69318	0.010528	0.254697	-2.73929
XLOC_011050	-0.541505	27.0838	-2.69191	0.0105617	0.25488	-2.74195
KIAA0528	0.391897	23.3919	2.69185	0.0105633	0.25488	-2.74208
LOC100510710	0.443038	31.2748	2.69113	0.0105822	0.255001	-2.74357
MTRF1	0.683762	29.0467	2.69031	0.0106041	0.255193	-2.7453
NDUFS7	0.457374	54.8788	2.68931	0.0106304	0.25536	-2.74736
PCMT1	0.418929	50.9141	2.689	0.0106389	0.25536	-2.74802
FXYD2	0.531575	32.7116	2.68588	0.0107221	0.257022	-2.75451
THRAP3	0.386382	39.4966	2.6848	0.0107511	0.257091	-2.75676
METAP1	0.346672	31.2045	2.68456	0.0107575	0.257091	-2.75726
ICAM2	0.480292	58.6289	2.68421	0.010767	0.257091	-2.75799
ATG16L2	-0.542002	40.2567	-2.68244	0.0108146	0.257894	-2.76168
CCL17	-0.852392	49.2576	-2.68066	0.010863	0.25829	-2.76539
PLAU	-0.496892	17.3399	-2.68043	0.0108692	0.25829	-2.76587
SNRPB	0.578505	68.8832	2.68027	0.0108735	0.25829	-2.76619
DYTN	-0.525609	34.6656	-2.67782	0.0109403	0.259543	-2.7713
MCM3	0.458345	44.7614	2.67682	0.0109675	0.259618	-2.77337
ZNF318	0.416862	27.5803	2.67391	0.0110475	0.259618	-2.77942
LOC158435	-0.478537	37.4046	-2.67379	0.0110509	0.259618	-2.77967
PURA	0.47695	28.2474	2.67377	0.0110512	0.259618	-2.7797
ELAVL1	0.54171	33.832	2.67283	0.0110772	0.259618	-2.78165
NCL	0.477758	47.0323	2.67275	0.0110796	0.259618	-2.78183
ZNF408	1.02571	38.7506	2.67207	0.0110984	0.259618	-2.78324
NCKAP1L	0.481213	42.4028	2.67205	0.0110989	0.259618	-2.78328
LOC285957	0.586249	27.3931	2.67199	0.0111005	0.259618	-2.7834
NCAPD2	0.54535	30.0745	2.67185	0.0111043	0.259618	-2.78368
SLC41A1	0.59417	38.7489	2.67172	0.0111079	0.259618	-2.78396
CCDC104	-0.387413	26.0982	-2.67016	0.0111514	0.259618	-2.78721
C12orf44	0.43064	50.0003	2.67012	0.0111525	0.259618	-2.78729
IKBIP	-0.538291	18.9169	-2.6701	0.011153	0.259618	-2.78733
BID	-0.605332	53.542	-2.6698	0.0111613	0.259618	-2.78795
CCT3	0.463235	36.1977	2.66899	0.0111837	0.259618	-2.78962
TSC22D2	0.487529	25.8389	2.66748	0.011226	0.259618	-2.79276
Q5A5F0	0.684611	29.1433	2.66687	0.0112432	0.259618	-2.79404
IP6K2	0.49503	38.5586	2.66685	0.0112438	0.259618	-2.79408
RPGRIP1	-0.73549	19.8376	-2.66676	0.0112463	0.259618	-2.79426
RNF44	0.355347	32.1451	2.66634	0.0112579	0.259618	-2.79512
XLOC_006814	-0.514935	19.5341	-2.6648	0.0113013	0.259618	-2.79832
IARS2	0.446615	33.0776	2.66474	0.0113028	0.259618	-2.79843
CHD1L	0.486403	37.8902	2.66416	0.0113193	0.259618	-2.79965
TIMELESS	0.587088	31.8846	2.6638	0.0113293	0.259618	-2.80038
HMGB4	-0.325105	14.0321	-2.66354	0.0113368	0.259618	-2.80093
MAP4	0.390655	51.3297	2.66351	0.0113377	0.259618	-2.801
CACNA2D3	-0.773779	23.3235	-2.663	0.0113518	0.259618	-2.80204
IRG1	0.555617	17.0592	2.66294	0.0113535	0.259618	-2.80216
XLOC_l2_010568	0.68071	33.7127	2.6611	0.0114056	0.259718	-2.80597
TTC25	-0.630431	12.6076	-2.66101	0.0114083	0.259718	-2.80617
CYBA	0.505971	65.8039	2.66048	0.0114234	0.259718	-2.80727
IMP3	0.467408	50.5203	2.66047	0.0114235	0.259718	-2.80727
ZNF333	-0.427198	27.9037	-2.6603	0.0114286	0.259718	-2.80764
TMEM167B	-0.427603	33.7414	-2.65874	0.0114729	0.260115	-2.81086
CYP2D6	-0.553886	25.5631	-2.65868	0.0114746	0.260115	-2.81099
LOC283575	-0.601767	14.6551	-2.65755	0.0115069	0.260115	-2.81332
ENO1	0.459387	47.7235	2.65732	0.0115137	0.260115	-2.81381
EMP3	0.488024	44.5565	2.65691	0.0115254	0.260115	-2.81466
SMARCC2	0.353026	48.2667	2.65671	0.0115311	0.260115	-2.81507
GIT1	0.558603	38.9611	2.65613	0.0115476	0.260169	-2.81626
SNORD109B	0.680921	28.8542	2.65275	0.0116449	0.261333	-2.82324
FAM157B	-0.608122	18.548	-2.65244	0.0116542	0.261333	-2.8239
SCAMP2	0.611209	45.2745	2.65205	0.0116654	0.261333	-2.8247
ERVMER34-1	-0.347002	24.5926	-2.65136	0.0116854	0.261333	-2.82613
TRAM2	0.599321	24.3193	2.6511	0.0116928	0.261333	-2.82666
FAM55C	0.640618	36.7236	2.65043	0.0117123	0.261333	-2.82804
VAMP5	0.510961	23.6221	2.65041	0.011713	0.261333	-2.82809
ZNF786	0.527875	30.4625	2.65008	0.0117224	0.261333	-2.82876
LOC202025	-0.451984	21.7522	-2.64991	0.0117274	0.261333	-2.82911
TFCP2	0.537406	29.6441	2.64709	0.0118098	0.26285	-2.83493
TMEM30C	-1.03557	20.9274	-2.64643	0.0118293	0.262965	-2.8363
COL6A2	0.747658	20.3153	2.6448	0.0118771	0.26356	-2.83965
CYP51A1	0.675949	29.4961	2.64454	0.0118848	0.26356	-2.84019
C18orf61	-1.01767	42.9062	-2.64296	0.0119315	0.26417	-2.84346
DPP3	0.527472	36.7797	2.64253	0.0119442	0.26417	-2.84434
PLAC8	0.595524	32.2975	2.64215	0.0119554	0.26417	-2.84512
XLOC_l2_001984	-0.420911	24.5149	-2.64136	0.0119789	0.264371	-2.84675
PSMC3	0.550292	61.4245	2.64008	0.012017	0.264875	-2.84939
RUNX2	-0.515334	27.4836	-2.63867	0.0120591	0.264875	-2.8523
EDC3	0.616639	48.9286	2.63776	0.0120862	0.264875	-2.85416
POFUT2	0.684456	35.4664	2.63734	0.0120989	0.264875	-2.85503
XLOC_005976	-1.00212	26.2354	-2.63724	0.0121018	0.264875	-2.85523
LOC100271831	-0.501735	21.6779	-2.63724	0.0121019	0.264875	-2.85524
FBXL13	-0.848814	14.8514	-2.63671	0.0121177	0.264875	-2.85632
EFNB1	0.504316	37.2544	2.63669	0.0121182	0.264875	-2.85636
PHF2	0.401724	24.0317	2.63593	0.012141	0.264875	-2.85792
XLOC_009631	-0.714465	47.4593	-2.63577	0.012146	0.264875	-2.85826
NDRG4	-0.920773	23.2654	-2.63455	0.0121829	0.265199	-2.86078
XLOC_l2_003391	-0.541392	25.0042	-2.63422	0.0121926	0.265199	-2.86145
LOC100505876	0.668817	24.5227	2.63373	0.0122075	0.265199	-2.86246
TMX2	0.489968	49.1208	2.63336	0.0122186	0.265199	-2.86321
HSP90AB1	0.591873	37.5425	2.63189	0.0122633	0.265854	-2.86624
TBCD	0.581783	39.1519	2.62925	0.0123435	0.267277	-2.87166
SUGP1	0.58167	58.9792	2.62703	0.0124114	0.268431	-2.87622
XLOC_014389	-0.40268	16.6793	-2.62644	0.0124296	0.268495	-2.87743
AP1B1	0.442748	40.0688	2.62599	0.0124436	0.268495	-2.87837
TGM1	0.612643	19.4955	2.62487	0.0124779	0.26892	-2.88066
TMEM192	0.735871	29.9894	2.6235	0.0125203	0.268968	-2.88347
THAP7	0.455775	40.4467	2.62324	0.0125284	0.268968	-2.88401
HERC2P7	-0.580723	23.0909	-2.6231	0.0125327	0.268968	-2.88429
KTI12	0.492052	45.1339	2.62248	0.0125517	0.268968	-2.88555
MOV10	0.586755	23.4185	2.62243	0.0125534	0.268968	-2.88567
LOC338963	-0.704943	35.0652	-2.62146	0.0125835	0.269194	-2.88765
ORAI1	0.735211	53.8089	2.62115	0.0125933	0.269194	-2.8883
EPG5	0.610534	24.4636	2.61942	0.0126471	0.269898	-2.89184
MED29	0.56519	19.749	2.61915	0.0126556	0.269898	-2.8924
XLOC_l2_009028	-0.714096	13.1504	-2.61764	0.0127027	0.270588	-2.89548
TMEM102	0.57639	51.3383	2.61683	0.0127281	0.270815	-2.89714
CLN6	-0.692333	22.6576	-2.61519	0.0127799	0.271366	-2.90051
PDXDC1	0.415704	33.1608	2.61507	0.0127835	0.271366	-2.90074
PPP1CA	0.565999	78.0333	2.61382	0.0128231	0.271702	-2.90331
C22orf37	-0.534344	35.4556	-2.61308	0.0128464	0.271702	-2.90481
ACCN2	0.748859	21.4701	2.61306	0.0128469	0.271702	-2.90485
PSMD3	0.548708	62.2499	2.6127	0.0128586	0.271702	-2.9056
EAF1	0.518617	22.3843	2.6116	0.0128935	0.271832	-2.90785
LINC00189	-0.737449	14.6843	-2.61157	0.0128943	0.271832	-2.9079
GBA	0.455564	37.7739	2.60985	0.0129491	0.272028	-2.91142
XLOC_008895	-0.703811	20.8612	-2.60967	0.012955	0.272028	-2.9118
MEF2B	-0.375704	37.4983	-2.60946	0.0129616	0.272028	-2.91222
PIGS	0.405538	54.2067	2.60942	0.0129629	0.272028	-2.91231
APOA1	0.789951	31.5962	2.60687	0.0130444	0.272843	-2.91751
LBH	0.509512	26.9331	2.60682	0.0130461	0.272843	-2.91761
ARHGAP21	0.702114	31.1563	2.60681	0.0130463	0.272843	-2.91763
MSL2	0.547855	34.8532	2.6053	0.013095	0.27355	-2.92072
CMTM8	-0.732831	16.8311	-2.60422	0.0131299	0.273968	-2.92293
LOC100506758	-0.336864	14.2362	-2.60351	0.013153	0.274137	-2.92438
C1orf138	-0.641889	22.3494	-2.60195	0.0132033	0.274874	-2.92755
ZNF721	0.400353	14.2871	2.60092	0.0132371	0.27511	-2.92967
XLOC_001688	-0.559677	15.8154	-2.59996	0.0132683	0.27511	-2.93162
PRICKLE1	0.614615	19.3806	2.59976	0.0132746	0.27511	-2.93201
LOC100128946	-0.499271	38.9784	-2.59968	0.0132772	0.27511	-2.93217
ITGB7	0.743487	53.8499	2.59877	0.013307	0.27511	-2.93404
GRAMD1B	0.423837	16.5818	2.5985	0.0133159	0.27511	-2.93459
SMYD3	0.377794	35.1761	2.59828	0.0133231	0.27511	-2.93504
PHF13	0.572061	34.562	2.59768	0.0133428	0.27511	-2.93626
COX16	-0.489479	29.2186	-2.59701	0.0133649	0.27511	-2.93763
SLC19A3	-0.466068	27.3735	-2.59645	0.0133832	0.27511	-2.93877
RBM3	-0.688815	26.97	-2.59574	0.0134065	0.27511	-2.94021
APOBEC3F	0.441367	29.5184	2.59527	0.0134222	0.27511	-2.94118
ITFG3	0.719724	68.7403	2.59526	0.0134222	0.27511	-2.94118
HAR1A	-0.395363	25.0471	-2.5952	0.0134244	0.27511	-2.94132
FUT8	0.501468	27.8616	2.59411	0.0134604	0.27554	-2.94354
XLOC_007868	-0.281146	18.461	-2.59343	0.0134829	0.275693	-2.94492
GAMT	0.489964	31.6826	2.59279	0.0135041	0.275713	-2.94622
UHRF1BP1L	-0.496741	32.0881	-2.59216	0.013525	0.275713	-2.9475
JAK2	0.353339	17.5031	2.59202	0.0135296	0.275713	-2.94779
XLOC_l2_013963	-0.425607	15.3817	-2.59158	0.0135441	0.275713	-2.94868
LOC155060	-0.49214	24.5772	-2.59074	0.0135723	0.275713	-2.9504
KRTAP6-3	-0.436641	13.2388	-2.59069	0.0135739	0.275713	-2.9505
UGGT1	0.552625	25.5157	2.58925	0.0136218	0.276379	-2.95341
NEK9	0.416268	36.2328	2.58849	0.0136473	0.276591	-2.95497
C5orf15	0.278955	18.8604	2.58803	0.0136628	0.276599	-2.9559
PVRL2	-0.730091	9.77738	-2.58638	0.0137181	0.277307	-2.95925
CHURC1	-0.773978	14.9813	-2.58572	0.0137404	0.277307	-2.9606
CYP1A2	0.915303	44.7611	2.58549	0.0137481	0.277307	-2.96107
COX2	0.576935	42.5652	2.58519	0.0137581	0.277307	-2.96167
GCM1	-0.516864	24.9954	-2.5838	0.0138052	0.27736	-2.9645
TIGD6	-0.601776	28.457	-2.58379	0.0138056	0.27736	-2.96452
LARS2	0.534453	29.9596	2.58367	0.0138097	0.27736	-2.96477
Q25LE9	0.454521	29.411	2.58333	0.0138212	0.27736	-2.96546
ABL1	0.452779	36.3269	2.58278	0.0138398	0.27743	-2.96657
SLC45A4	-0.505504	23.4603	-2.58169	0.0138768	0.277869	-2.96878
REXO4	0.359188	42.5946	2.57918	0.0139624	0.279189	-2.97387
RPN2	0.489405	43.7403	2.57886	0.0139732	0.279189	-2.97451
FLJ30403	0.505956	22.8459	2.57824	0.0139944	0.279309	-2.97577
XLOC_008524	-0.617937	29.8801	-2.57713	0.0140325	0.279767	-2.97803
DAG1	0.664802	30.9126	2.57612	0.0140673	0.279952	-2.98007
BUD13	0.621768	66.6515	2.57598	0.0140723	0.279952	-2.98037
DEAF1	0.565433	47.8506	2.57527	0.0140967	0.280092	-2.9818
ZNF343	0.896684	34.0843	2.57489	0.0141099	0.280092	-2.98258
CCDC125	-0.627159	30.9394	-2.57196	0.0142111	0.28084	-2.9885
PFAS	0.587412	17.1263	2.57168	0.014221	0.28084	-2.98907
XLOC_013981	-0.416927	22.3408	-2.57046	0.0142634	0.28084	-2.99154
NOP56	0.439194	32.8955	2.56962	0.0142927	0.28084	-2.99323
OTUD4	0.50336	24.3172	2.56946	0.0142982	0.28084	-2.99355
UNG	0.560465	36.8658	2.56923	0.0143064	0.28084	-2.99403
XLOC_004446	-0.307105	14.3896	-2.56912	0.0143102	0.28084	-2.99425
C21orf33	-0.466575	49.8239	-2.56889	0.0143181	0.28084	-2.99471
IL27RA	0.479219	51.5435	2.56825	0.0143408	0.28084	-2.99601
HAUS7	0.480394	46.0084	2.5678	0.0143566	0.28084	-2.99692
CPNE6	-0.446538	19.0405	-2.56762	0.0143627	0.28084	-2.99728
TUBA1B	0.525312	52.8175	2.5673	0.0143742	0.28084	-2.99794
USP5	0.575215	40.4342	2.56677	0.0143925	0.28084	-2.99899
NFATC1	0.505885	37.5022	2.56676	0.014393	0.28084	-2.99902
CRY1	0.466149	24.6112	2.56653	0.0144011	0.28084	-2.99949
OTP	-0.438085	14.7014	-2.56631	0.0144087	0.28084	-2.99992
CECR2	-0.36326	20.4893	-2.56612	0.0144155	0.28084	-3.00032
KRTAP19-8	0.524864	28.5062	2.56554	0.0144358	0.28084	-3.00148
XLOC_007985	-0.66478	28.976	-2.56548	0.0144381	0.28084	-3.00161
LINC00173	-0.419824	21.244	-2.56481	0.0144619	0.28087	-3.00297
HECTD1	0.315485	27.8665	2.56394	0.0144923	0.28087	-3.00471
ABCF3	0.456206	64.675	2.56381	0.0144972	0.28087	-3.00499
GCOM1	0.359483	18.9022	2.5634	0.0145117	0.28087	-3.00582
MAFB	0.473615	22.163	2.56296	0.0145273	0.28087	-3.00671
CWC15	-0.577979	49.8463	-2.56259	0.0145402	0.28087	-3.00744
CLCA3P	-0.384605	16.0727	-2.56241	0.0145467	0.28087	-3.00782
TMEM159	0.563633	36.3352	2.5612	0.0145898	0.281178	-3.01026
EID2	0.364104	30.7155	2.5611	0.0145933	0.281178	-3.01046
SPAST	0.306326	19.1985	2.5599	0.0146361	0.281708	-3.01288
SUV39H1	0.445815	41.8733	2.55829	0.0146935	0.28247	-3.01612
POLR2A	0.342011	29.5631	2.55737	0.0147266	0.28247	-3.01798
VPS37A	0.437469	31.777	2.55733	0.014728	0.28247	-3.01806
TMEM131	0.518836	34.6928	2.55707	0.0147373	0.28247	-3.01858
MYCBP2	0.40645	38.6027	2.55653	0.0147567	0.282547	-3.01967
UBTF	0.443813	35.3475	2.55565	0.0147887	0.282864	-3.02146
AGFG1	0.452661	29.1465	2.55474	0.0148213	0.283193	-3.02328
ESYT2	0.495457	30.3852	2.55359	0.0148629	0.283587	-3.0256
CLSTN3	0.729452	27.8679	2.55332	0.0148728	0.283587	-3.02615
CIRBP	-0.490524	41.043	-2.55254	0.0149009	0.283828	-3.02771
WIPF1	-0.33375	38.5128	-2.55188	0.014925	0.283828	-3.02905
FOXK1	0.465848	20.5579	2.55143	0.0149414	0.283828	-3.02996
XLOC_001149	-0.610609	33.7429	-2.55127	0.0149472	0.283828	-3.03028
TGFB1	0.514702	44.7056	2.55044	0.0149773	0.284104	-3.03194
DENND3	-0.36349	27.7453	-2.54816	0.0150607	0.285391	-3.03653
BRE	0.504642	48.7564	2.54738	0.0150894	0.28564	-3.0381
KIAA0226	0.526995	32.5544	2.54658	0.0151189	0.28571	-3.03972
XLOC_009911	-0.497949	28.7283	-2.54492	0.01518	0.28571	-3.04305
TPO	-0.783816	37.1096	-2.54458	0.0151925	0.28571	-3.04373
TXLNA	0.476693	48.8132	2.54455	0.0151936	0.28571	-3.04379
RSBN1	0.685799	52.2303	2.54451	0.0151951	0.28571	-3.04387
LOC100133124	-0.483717	17.2635	-2.54442	0.0151984	0.28571	-3.04405
NUP160	0.380284	25.7865	2.54422	0.0152058	0.28571	-3.04446
TXNL4A	0.63213	65.1853	2.5439	0.0152175	0.28571	-3.04509
GNGT2	0.411233	19.6179	2.54295	0.015253	0.286083	-3.04702
NSMAF	-0.446663	44.7655	-2.54045	0.0153456	0.287526	-3.05202
ARHGEF18	0.477939	38.4985	2.53821	0.0154295	0.288036	-3.05653
C19orf52	0.500819	51.9054	2.53798	0.0154381	0.288036	-3.05698
PAICS	0.476786	36.4506	2.53774	0.0154472	0.288036	-3.05747
ATG4B	0.505837	40.4879	2.53734	0.0154623	0.288036	-3.05828
XLOC_004406	-0.5154	15.8512	-2.53726	0.0154653	0.288036	-3.05844
LOC100130916	-0.342296	13.7337	-2.53721	0.0154669	0.288036	-3.05853
NACA	-0.495447	51.4709	-2.53667	0.0154875	0.288126	-3.05962
SPRY3	-0.357131	19.6425	-2.53618	0.0155056	0.288173	-3.06059
LOC100132273	-0.448285	26.4561	-2.53527	0.01554	0.28852	-3.06242
LOC401431	0.577448	19.8255	2.5342	0.0155806	0.28898	-3.06457
DCTN3	0.634677	74.0205	2.53326	0.015616	0.289271	-3.06645
TBCCD1	0.493789	46.9996	2.53295	0.0156278	0.289271	-3.06707
UBE2D2	0.389633	33.2299	2.53035	0.0157267	0.290454	-3.07228
MYEF2	0.553977	29.1733	2.53013	0.0157348	0.290454	-3.07271
PRSS57	-0.778334	16.1088	-2.52959	0.0157556	0.290454	-3.0738
XLOC_011718	-0.472779	26.9351	-2.52918	0.0157713	0.290454	-3.07462
SNRPB2	0.438039	39.4855	2.52885	0.0157841	0.290454	-3.07529
HS1BP3	0.416482	37.1592	2.52833	0.0158037	0.290454	-3.07632
ZBTB43	0.507218	46.884	2.52798	0.0158171	0.290454	-3.07701
SETDB1	0.397345	46.9394	2.52761	0.0158314	0.290454	-3.07776
TMEM98	-0.798282	17.6484	-2.52754	0.015834	0.290454	-3.0779
LOC91948	0.399648	19.6761	2.52438	0.0159557	0.292394	-3.08422
EDARADD	0.469892	45.1859	2.52358	0.0159866	0.292667	-3.08581
BAIAP2L2	-0.623224	24.0305	-2.52278	0.0160176	0.292944	-3.08741
HIVEP1	0.423267	22.1102	2.52167	0.016061	0.293192	-3.08965
FRS2	0.432108	29.234	2.52129	0.0160756	0.293192	-3.0904
LOC100132006	-0.426991	26.5889	-2.52054	0.0161049	0.293192	-3.0919
AIFM2	0.542057	34.5637	2.52039	0.0161107	0.293192	-3.0922
ZNF696	0.648083	32.5778	2.52022	0.0161171	0.293192	-3.09253
CYP2S1	-0.53422	22.2114	-2.51997	0.016127	0.293192	-3.09303
MIR143HG	-0.795172	36.1757	-2.51726	0.016233	0.294827	-3.09843
DBP	0.519517	40.1525	2.51599	0.0162832	0.2954	-3.10098
C13orf33	-0.807081	31.9674	-2.51564	0.0162967	0.2954	-3.10167
DFFA	0.410127	55.2025	2.51469	0.0163344	0.295722	-3.10357
XLOC_009375	-0.338124	11.6668	-2.51438	0.0163467	0.295722	-3.10419
CYP27A1	-0.687025	18.6455	-2.51328	0.0163902	0.296145	-3.10639
RNF34	0.413756	42.2476	2.51297	0.0164023	0.296145	-3.107
LOC100144603	-0.353091	31.1304	-2.51198	0.0164417	0.296402	-3.10898
LOC100506775	-0.743216	27.3308	-2.51148	0.0164613	0.296402	-3.10996
C9orf153	-0.738951	25.9016	-2.51139	0.016465	0.296402	-3.11014
TCN2	0.479225	12.4551	2.51058	0.0164974	0.296696	-3.11177
ARMCX5	0.357351	21.45	2.51013	0.0165151	0.296723	-3.11265
DYNC1H1	0.413074	36.8038	2.50954	0.0165387	0.296856	-3.11383
TATDN2	0.547652	51.1984	2.5068	0.0166483	0.297789	-3.11927
XLOC_l2_006939	-0.707958	14.8961	-2.5066	0.0166566	0.297789	-3.11969
PDCD11	0.546448	36.92	2.50649	0.0166608	0.297789	-3.11989
LOC100132724	0.462244	31.5275	2.50619	0.0166732	0.297789	-3.1205
PKM2	0.517729	43.984	2.506	0.0166806	0.297789	-3.12087
CWC22	-0.424137	27.8127	-2.50578	0.0166896	0.297789	-3.12131
NMT1	0.475083	49.2869	2.50502	0.0167201	0.297789	-3.12282
XLOC_006416	-0.598153	19.1947	-2.50501	0.0167204	0.297789	-3.12284
MTMR9	0.562634	34.7195	2.50457	0.0167382	0.297817	-3.12371
NCOA3	0.469419	31.6313	2.50311	0.0167972	0.298576	-3.12661
PRKCA	0.430378	22.4746	2.50199	0.0168429	0.298816	-3.12885
SIRT1	0.421917	32.0464	2.50176	0.0168522	0.298816	-3.12931
NEAT1	-0.463401	26.425	-2.50112	0.016878	0.298816	-3.13057
GNG10	-0.478052	20.2159	-2.50088	0.0168877	0.298816	-3.13104
HEG1	0.520001	21.1157	2.50078	0.016892	0.298816	-3.13125
KIAA1147	0.352437	28.8897	2.50031	0.016911	0.298842	-3.13218
TMEM14B	-0.435284	37.7785	-2.49955	0.0169421	0.298842	-3.13369
RHOBTB2	0.660887	43.4687	2.49954	0.0169423	0.298842	-3.1337
TRAFD1	0.426843	40.9064	2.49904	0.0169627	0.298894	-3.1347
MYLK4	-0.705092	30.5145	-2.49867	0.0169778	0.298894	-3.13543
ZNF259	0.457901	52.0085	2.49708	0.0170433	0.29976	-3.1386
CIAPIN1	0.519283	53.518	2.49593	0.0170904	0.300232	-3.14087
LOC100506544	0.718523	21.4233	2.49563	0.0171029	0.300232	-3.14148
SEC23IP	0.325966	22.4032	2.49516	0.0171222	0.300284	-3.14241
BUB3	0.471294	48.1091	2.49304	0.0172096	0.30153	-3.1466
TNNT3	-0.717861	23.1178	-2.49264	0.0172261	0.301531	-3.14739
SPECC1L	0.458666	37.6055	2.49196	0.0172543	0.301737	-3.14874
FAM3B	0.668223	6.92127	2.49154	0.0172719	0.301757	-3.14958
SSH2	-0.399593	28.1386	-2.49068	0.0173075	0.302091	-3.15127
LAMB3	0.839118	33.816	2.48963	0.0173514	0.302571	-3.15336
C21orf81	-0.599839	21.6717	-2.48861	0.0173938	0.302947	-3.15537
XLOC_007059	-0.495928	34.5489	-2.48832	0.017406	0.302947	-3.15595
KIAA0922	0.556334	40.4776	2.48742	0.0174436	0.303096	-3.15773
SEMA4F	0.500462	33.0668	2.48733	0.0174476	0.303096	-3.15791
GORASP2	0.513185	51.7903	2.48598	0.0175044	0.303796	-3.16059
KRT16P3	-0.357674	12.0235	-2.48335	0.0176152	0.304792	-3.16578
LMAN2L	0.629966	43.3047	2.48201	0.0176721	0.304792	-3.16844
PRSS55	-0.409957	20.52	-2.48199	0.017673	0.304792	-3.16848
XLOC_005115	-0.36612	14.7467	-2.48176	0.0176825	0.304792	-3.16893
PDIA4	0.545032	26.1381	2.48174	0.0176836	0.304792	-3.16897
KIAA1875	-0.391981	36.8147	-2.48097	0.0177163	0.304792	-3.1705
XLOC_005020	-0.412521	18.5227	-2.48039	0.0177406	0.304792	-3.17163
POLA1	0.50904	30.4196	2.48015	0.0177511	0.304792	-3.17211
SRGN	-0.349019	36.5358	-2.47966	0.017772	0.304792	-3.17308
ADRBK1	0.450591	50.5835	2.47842	0.0178246	0.304792	-3.17551
PDZD11	0.561361	36.1541	2.47834	0.0178283	0.304792	-3.17568
C2orf82	-0.521188	33.0843	-2.47806	0.0178403	0.304792	-3.17624
WWOX	0.351441	33.2572	2.47764	0.0178581	0.304792	-3.17706
CHMP4B	0.650924	33.5168	2.47762	0.0178591	0.304792	-3.1771
PITPNB	0.504318	52.3861	2.47675	0.0178964	0.304792	-3.17882
HIC2	0.394165	41.2637	2.47623	0.0179186	0.304792	-3.17984
ITPR2	0.395188	30.1245	2.47623	0.0179188	0.304792	-3.17985
LOC100653325	-0.390036	11.1268	-2.47568	0.0179425	0.304792	-3.18094
FBXO17	-0.324781	17.8814	-2.47529	0.0179593	0.304792	-3.18171
XLOC_000932	-0.842435	29.8083	-2.47489	0.0179762	0.304792	-3.18248
MAPKAPK2	0.565736	57.7037	2.47473	0.0179832	0.304792	-3.1828
PHF20L1	-0.32827	27.6794	-2.47468	0.0179854	0.304792	-3.18291
SIAH1	-0.496749	33.2057	-2.47449	0.0179936	0.304792	-3.18328
DNMT1	0.599297	23.4563	2.47376	0.0180253	0.304792	-3.18472
XLOC_l2_001206	-0.364867	35.6813	-2.4733	0.0180451	0.304792	-3.18563
RPL23P8	-0.493052	32.9819	-2.47322	0.0180484	0.304792	-3.18578
CCDC25	0.489041	26.9106	2.4722	0.0180924	0.304792	-3.18778
C17orf101	0.681927	41.3261	2.47207	0.0180982	0.304792	-3.18805
UTP14C	0.317404	29.2522	2.47153	0.0181214	0.304792	-3.1891
INTS4L2	0.856182	50.4162	2.47107	0.0181417	0.304792	-3.19002
MTM1	-0.591621	40.2932	-2.4703	0.0181751	0.304792	-3.19154
SPIN1	0.36415	26.5474	2.46999	0.0181888	0.304792	-3.19215
Q8WNA4	0.791237	22.0695	2.46966	0.0182032	0.304792	-3.1928
ARHGDIA	0.58966	59.0157	2.46913	0.0182262	0.304792	-3.19385
TSPAN16	-0.757957	17.156	-2.46891	0.0182358	0.304792	-3.19428
LOC729040	-0.459502	14.2292	-2.46889	0.0182366	0.304792	-3.19431
SNAPC5	0.377837	35.0947	2.46864	0.0182474	0.304792	-3.1948
MORC2	0.684081	37.8669	2.4685	0.0182537	0.304792	-3.19508
GLT1D1	-0.438624	36.0778	-2.46804	0.0182735	0.304792	-3.19598
CEP76	0.425477	44.5631	2.46766	0.0182903	0.304792	-3.19673
CDK2AP2	0.504856	53.9286	2.46742	0.0183007	0.304792	-3.1972
TG	-0.754189	27.5864	-2.46738	0.0183026	0.304792	-3.19728
XLOC_l2_009311	-0.573858	39.0198	-2.46737	0.0183029	0.304792	-3.1973
IST1	0.461606	30.4846	2.46726	0.0183077	0.304792	-3.19751
CD200R1	-0.502334	29.6517	-2.46724	0.0183088	0.304792	-3.19756
ZMYND17	-0.386868	25.7047	-2.46571	0.0183757	0.305628	-3.20056
SP2	0.476854	32.7451	2.4634	0.0184776	0.307045	-3.20511
FAM13A-AS1	-0.566881	30.7669	-2.46112	0.0185786	0.308234	-3.20959
FAT3	-0.442585	26.5169	-2.46012	0.018623	0.308234	-3.21155
KIF3B	0.516016	30.8815	2.45979	0.0186378	0.308234	-3.21221
AFF4	0.396184	28.9224	2.45957	0.0186477	0.308234	-3.21264
HSPA9	0.413673	28.5624	2.45905	0.0186709	0.308234	-3.21367
ATXN7L3B	0.483508	31.9323	2.45894	0.0186758	0.308234	-3.21388
LRRC33	0.436349	25.8412	2.45885	0.0186795	0.308234	-3.21404
XLOC_l2_007359	-0.523205	24.9054	-2.45824	0.0187068	0.308234	-3.21524
XLOC_002140	-0.520227	22.6462	-2.45769	0.0187314	0.308234	-3.21632
MSR1	0.615852	17.2047	2.45737	0.018746	0.308234	-3.21696
UVRAG	0.537179	30.3722	2.45727	0.0187504	0.308234	-3.21716
TTYH1	-0.685376	26.0735	-2.45726	0.0187505	0.308234	-3.21716
GPR18	0.505167	27.3051	2.45611	0.0188021	0.308669	-3.21942
LOC100130285	-0.849948	42.4841	-2.45588	0.0188125	0.308669	-3.21987
LOC100292905	-0.27585	21.2521	-2.45555	0.0188274	0.308669	-3.22053
STARD7	0.414347	43.3925	2.45389	0.0189022	0.309414	-3.22378
LONP2	0.781127	36.7023	2.45344	0.0189226	0.309414	-3.22467
PDE2A	-0.510897	14.7937	-2.45342	0.0189234	0.309414	-3.2247
LOC100133331	-0.561313	23.7764	-2.45222	0.0189774	0.309681	-3.22704
MT1X	0.421441	25.1186	2.45214	0.0189813	0.309681	-3.22721
COL18A1	-0.626034	15.7163	-2.45174	0.0189994	0.309681	-3.228
KCTD17	0.652993	39.4225	2.45153	0.0190088	0.309681	-3.2284
HERC1	0.353641	31.1582	2.45119	0.0190241	0.309681	-3.22906
NMD3	-0.632238	33.1894	-2.45016	0.0190708	0.309725	-3.23108
TNFRSF14	-0.352458	46.7246	-2.45007	0.0190753	0.309725	-3.23127
LOC729799	-0.519063	43.155	-2.44969	0.0190924	0.309725	-3.23201
POLRMT	0.519288	54.2522	2.44965	0.0190942	0.309725	-3.23209
FLJ44674	-0.343695	19.5406	-2.44887	0.0191298	0.309814	-3.23362
MOK	-0.648161	28.5476	-2.44836	0.0191531	0.309814	-3.23461
MYL4	-0.449727	12.7835	-2.44774	0.0191814	0.309814	-3.23583
FAM157A	-0.598761	18.6711	-2.44722	0.0192053	0.309814	-3.23685
XLOC_012348	-0.666567	32.6896	-2.44695	0.0192174	0.309814	-3.23737
DHX35	0.409886	34.0122	2.44549	0.0192843	0.309814	-3.24022
MRPL13	-0.323625	18.0298	-2.44515	0.0193	0.309814	-3.24089
CECR1	0.388316	31.9192	2.44465	0.0193232	0.309814	-3.24188
LOC100653051	-0.415328	20.3547	-2.44459	0.0193256	0.309814	-3.24198
C9orf82	0.41207	21.9909	2.44448	0.019331	0.309814	-3.24221
NDUFA12	0.556195	39.551	2.44396	0.0193548	0.309814	-3.24322
CCDC92	0.713269	47.2851	2.44367	0.0193681	0.309814	-3.24378
ALG10	0.512209	30.8666	2.44365	0.0193693	0.309814	-3.24383
PPIEL	-0.587578	34.1838	-2.44321	0.0193894	0.309814	-3.24469
FARSA	0.606122	48.5302	2.44267	0.0194144	0.309814	-3.24575
XLOC_005442	0.676968	16.1128	2.44252	0.0194212	0.309814	-3.24603
AOC3	-0.578659	15.6238	-2.44248	0.019423	0.309814	-3.24611
XLOC_007957	-0.450692	25.4327	-2.44229	0.0194321	0.309814	-3.24649
CNOT4	0.422964	38.7413	2.44213	0.0194393	0.309814	-3.2468
XLOC_011011	-0.318712	12.5632	-2.44201	0.0194449	0.309814	-3.24703
ZBTB8OS	-0.387065	35.936	-2.44181	0.0194541	0.309814	-3.24742
NHEJ1	0.553828	37.6848	2.44113	0.0194855	0.309901	-3.24875
PHF3	0.38269	30.4503	2.44096	0.0194933	0.309901	-3.24907
XLOC_011080	-0.632074	14.0924	-2.44029	0.0195244	0.310128	-3.25038
ARID1A	0.480929	25.5741	2.43955	0.0195588	0.310385	-3.25183
YTHDC1	0.505666	24.8007	2.43916	0.0195771	0.310385	-3.2526
BSCL2	0.78407	28.2258	2.43886	0.0195913	0.310385	-3.25319
RUFY4	-0.612554	19.6846	-2.43825	0.0196196	0.310564	-3.25437
KLHL9	0.336145	22.1955	2.43732	0.0196629	0.310982	-3.25618
ABCB8	0.534678	34.4694	2.43634	0.0197089	0.311381	-3.2581
TXNIP	0.417011	50.9954	2.43606	0.019722	0.311381	-3.25865
RAB3GAP2	0.478869	45.3737	2.43472	0.0197851	0.312045	-3.26127
GTF2E2	0.544379	45.2706	2.43342	0.0198461	0.312045	-3.26379
OTOP2	-0.626924	41.2728	-2.43308	0.0198621	0.312045	-3.26446
TBC1D2B	0.557122	57.9857	2.43199	0.0199134	0.312045	-3.26657
GPR78	-0.383734	12.8229	-2.43173	0.019926	0.312045	-3.26709
ENTPD2	-0.675859	16.3331	-2.43156	0.0199341	0.312045	-3.26743
MRPS33	-0.353372	27.9023	-2.43068	0.0199757	0.312045	-3.26913
HAB1	-0.673369	32.8243	-2.43037	0.0199902	0.312045	-3.26973
SCARA3	-0.312436	14.0418	-2.42995	0.0200103	0.312045	-3.27055
LOC153811	-0.53413	29.4873	-2.42976	0.0200192	0.312045	-3.27092
PSMD8	0.411634	69.2669	2.42923	0.0200444	0.312045	-3.27195
OAZ2	-0.6045	58.8342	-2.42909	0.020051	0.312045	-3.27222
C1S	-0.385535	14.7612	-2.42893	0.0200588	0.312045	-3.27254
PARK2	-0.713984	35.3881	-2.42884	0.0200629	0.312045	-3.27271
TRPV2	0.441827	64.5884	2.42869	0.0200704	0.312045	-3.27301
DNAJA3	0.410727	35.3304	2.42802	0.020102	0.312045	-3.2743
CBX6	0.684201	49.0394	2.42778	0.0201134	0.312045	-3.27477
SYCE1L	-0.636396	44.7571	-2.42773	0.020116	0.312045	-3.27488
ZNF169	-0.287319	30.2694	-2.42733	0.0201352	0.312045	-3.27566
LIMD1	0.54619	34.6001	2.42602	0.0201976	0.312045	-3.2782
TP53I3	0.602079	26.1155	2.4255	0.0202225	0.312045	-3.2792
BTBD10	0.302868	25.4979	2.42491	0.020251	0.312045	-3.28036
LIN7B	0.564397	37.7161	2.42478	0.0202574	0.312045	-3.28062
PRRT2	-0.483196	17.0037	-2.42476	0.0202581	0.312045	-3.28065
CXCL12	-0.316324	13.1191	-2.42463	0.0202646	0.312045	-3.28091
BANF1	0.592382	43.8786	2.42458	0.0202668	0.312045	-3.281
TOP3B	0.537939	40.5618	2.42454	0.0202685	0.312045	-3.28107
E4F1	0.530745	54.2803	2.42454	0.0202689	0.312045	-3.28108
TARDBP	0.335488	42.1039	2.42286	0.0203494	0.312045	-3.28433
CR2	0.55485	19.2716	2.42157	0.020412	0.312045	-3.28685
XLOC_l2_015033	-0.439516	17.97	-2.42128	0.0204257	0.312045	-3.2874
UBE2Q1	0.544329	34.8884	2.42086	0.0204461	0.312045	-3.28822
TECR	0.486293	57.1305	2.42056	0.0204606	0.312045	-3.2888
ANAPC7	0.531232	35.3184	2.42042	0.0204675	0.312045	-3.28908
KRI1	0.365112	46.3494	2.42042	0.0204678	0.312045	-3.28909
EWSR1	0.315497	44.1505	2.42023	0.020477	0.312045	-3.28946
APP	0.482374	27.0733	2.42019	0.0204789	0.312045	-3.28954
DDX10	0.428018	30.5439	2.41998	0.0204887	0.312045	-3.28993
XLOC_011681	-0.645122	30.7606	-2.41973	0.020501	0.312045	-3.29042
CHIC2	0.457597	38.7392	2.41967	0.0205038	0.312045	-3.29053
RNF220	0.419195	50.0729	2.41944	0.020515	0.312045	-3.29098
XLOC_013694	-0.372571	20.6388	-2.41921	0.0205262	0.312045	-3.29143
IREB2	0.332708	20.2594	2.41906	0.0205334	0.312045	-3.29171
UBR1	0.285794	18.095	2.41906	0.0205336	0.312045	-3.29172
SLC7A6OS	0.453156	48.3164	2.41877	0.0205475	0.312045	-3.29228
WFS1	0.482813	27.0845	2.41854	0.0205587	0.312045	-3.29272
LIMS2	0.712432	20.029	2.41846	0.0205628	0.312045	-3.29289
NEK7	-0.498679	34.2861	-2.41802	0.0205844	0.312114	-3.29375
NASP	0.298747	28.3887	2.41757	0.020606	0.312116	-3.29461
RHOH	0.398488	35.6649	2.4167	0.0206489	0.312116	-3.29631
ZNF330	0.518922	40.6523	2.41628	0.0206693	0.312116	-3.29712
LOC401480	-0.423552	46.5779	-2.41624	0.0206713	0.312116	-3.2972
APLP1	-0.743643	41.5917	-2.41559	0.0207031	0.312116	-3.29846
XLOC_000008	-0.763681	36.1075	-2.41545	0.0207099	0.312116	-3.29873
XLOC_011672	-0.740047	41.7938	-2.41434	0.0207644	0.312116	-3.30088
CHD8	0.445466	39.1012	2.4142	0.0207712	0.312116	-3.30115
GPRC5C	-0.591396	18.331	-2.41385	0.0207883	0.312116	-3.30182
XLOC_005244	-0.485667	24.841	-2.41379	0.0207913	0.312116	-3.30194
ANKRD22	0.542429	12.4945	2.41356	0.0208027	0.312116	-3.30239
LOC100507297	-0.610269	37.2196	-2.41336	0.0208125	0.312116	-3.30278
GTF2E1	0.296715	20.343	2.41307	0.0208265	0.312116	-3.30333
XLOC_013708	-0.432975	26.5332	-2.41242	0.0208589	0.312116	-3.3046
XLOC_010556	-0.434827	30.3288	-2.41238	0.0208608	0.312116	-3.30468
XLOC_004577	-0.457021	23.2132	-2.41211	0.020874	0.312116	-3.30519
EIF2AK3	0.497707	31.2325	2.4115	0.020904	0.312116	-3.30637
CCDC124	0.528472	48.1824	2.41137	0.0209105	0.312116	-3.30663
SNORA39	-0.332946	16.1618	-2.41114	0.0209219	0.312116	-3.30707
KCTD1	0.502806	29.2762	2.41087	0.0209355	0.312116	-3.30761
TMEM64	0.415157	25.1742	2.41042	0.0209578	0.312116	-3.30848
LINC00340	-0.620443	24.4576	-2.4104	0.0209584	0.312116	-3.3085
ADAD2	-0.675159	44.2939	-2.40941	0.0210077	0.31244	-3.31043
LOC389765	-0.585207	31.3445	-2.40928	0.0210143	0.31244	-3.31068
USP14	0.537095	32.3616	2.40869	0.0210433	0.312619	-3.31181
XLOC_012572	-0.590837	32.1073	-2.40758	0.0210986	0.313064	-3.31396
STXBP2	0.573027	34.0357	2.40739	0.0211081	0.313064	-3.31433
XLOC_014111	0.698032	27.143	2.40706	0.0211244	0.313064	-3.31496
TMEM217	-0.589371	29.2086	-2.40637	0.0211589	0.313078	-3.3163
ACTR1A	0.393937	53.7478	2.40636	0.0211595	0.313078	-3.31632
DBNDD2	0.604423	48.3218	2.4059	0.0211826	0.31308	-3.31722
PAK2	0.424905	25.4114	2.40507	0.0212243	0.31308	-3.31883
HTATSF1	0.303517	25.8124	2.40479	0.021238	0.31308	-3.31935
C16orf80	0.405703	43.5921	2.40478	0.0212388	0.31308	-3.31938
ERLIN2	0.49082	38.0757	2.40456	0.0212496	0.31308	-3.3198
UTP15	0.405798	28.6877	2.40393	0.0212811	0.31308	-3.32102
ARFGAP2	0.37719	68.7259	2.40376	0.0212897	0.31308	-3.32134
C3orf58	0.446454	24.7824	2.40335	0.0213104	0.31308	-3.32214
FBLN5	0.634543	14.0079	2.4033	0.0213131	0.31308	-3.32224
U2AF2	0.35184	55.931	2.40275	0.0213407	0.313236	-3.3233
XLOC_000021	-0.368821	13.2563	-2.40212	0.0213725	0.313451	-3.32452
XLOC_006844	0.414112	21.9228	2.40167	0.0213953	0.313536	-3.3254
XLOC_013531	-0.662643	15.1216	-2.40053	0.0214526	0.314125	-3.32759
LRRC61	0.664854	29.1141	2.39958	0.0215007	0.314579	-3.32942
FLI1	0.312872	25.52	2.39823	0.0215694	0.314866	-3.33203
LOC100505634	-0.49938	23.8372	-2.3981	0.0215761	0.314866	-3.33229
XLOC_009382	-0.743226	14.0335	-2.39805	0.0215785	0.314866	-3.33238
RNMTL1	0.48057	42.0312	2.39758	0.0216023	0.314866	-3.33328
C14orf135	-0.37138	39.6471	-2.39744	0.0216094	0.314866	-3.33355
NUMA1	0.446468	37.3027	2.39717	0.0216232	0.314866	-3.33407
KBTBD8	0.586871	27.2138	2.39626	0.0216695	0.314967	-3.33582
RRAS2	0.431833	16.4706	2.39612	0.0216771	0.314967	-3.33611
CTNNA1	0.504861	22.25	2.39578	0.0216943	0.314967	-3.33675
LOC100289019	-0.55563	28.2317	-2.39569	0.0216988	0.314967	-3.33692
OR2A9P	0.624218	16.4645	2.39524	0.0217219	0.315054	-3.3378
LOC100507520	-0.534705	22.5678	-2.39366	0.0218028	0.315119	-3.34084
PRKX	0.562374	30.3176	2.39347	0.0218128	0.315119	-3.34121
LOC100653003	0.75591	48.7873	2.39296	0.0218388	0.315119	-3.34219
XLOC_014134	-0.822883	40.2577	-2.3929	0.0218421	0.315119	-3.34231
FAM207A	0.368473	35.6579	2.39276	0.0218493	0.315119	-3.34258
CDKAL1	0.366366	24.018	2.39274	0.02185	0.315119	-3.34261
DLEC1	-0.689516	26.7046	-2.39243	0.0218662	0.315119	-3.34321
P2RX2	-0.352766	15.5957	-2.39204	0.0218861	0.315119	-3.34396
RBM14	0.359516	50.0604	2.39193	0.021892	0.315119	-3.34418
RTN4R	0.638491	32.645	2.39179	0.021899	0.315119	-3.34444
XLOC_l2_000123	-0.385845	34.9351	-2.3914	0.0219189	0.315119	-3.34518
DOPEY2	0.549113	23.6785	2.39093	0.0219432	0.315119	-3.34609
TRIM35	0.698528	46.0337	2.39081	0.0219495	0.315119	-3.34632
ZFYVE26	0.418333	36.1787	2.39017	0.0219825	0.315272	-3.34755
WDR4	0.969506	22.7149	2.38994	0.0219945	0.315272	-3.348
ODF2	0.376803	42.5328	2.38909	0.0220386	0.315469	-3.34964
PLXDC2	0.535192	27.2424	2.38901	0.0220426	0.315469	-3.34979
SNORA70B	-0.483536	33.9321	-2.38826	0.0220816	0.315781	-3.35123
SNX19	0.477716	29.3381	2.38764	0.0221136	0.315992	-3.35242
PATE3	-0.484469	34.2504	-2.38693	0.0221506	0.316274	-3.35378
EBLN2	-0.393197	36.902	-2.38571	0.0222147	0.316889	-3.35615
XLOC_008311	-0.284571	12.5303	-2.38545	0.0222281	0.316889	-3.35664
LOC100652897	-0.394441	24.6064	-2.38372	0.0223184	0.317929	-3.35995
SNAPC2	0.532992	66.8219	2.38312	0.0223503	0.318071	-3.36112
SNAI1	-0.557287	36.8879	-2.38287	0.022363	0.318071	-3.36159
ACBD7	-0.540628	32.5452	-2.38148	0.0224365	0.318414	-3.36427
SPRR1B	0.559785	29.6451	2.38144	0.0224382	0.318414	-3.36433
CSTF3	0.396147	32.7602	2.38113	0.0224548	0.318414	-3.36493
CCDC91	0.335808	17.751	2.38107	0.0224577	0.318414	-3.36504
FLJ40288	-0.379098	22.7118	-2.38077	0.0224739	0.318414	-3.36563
ADAT2	0.507969	37.159	2.37969	0.0225309	0.318977	-3.3677
GMCL1	0.352536	21.9702	2.37916	0.0225588	0.319125	-3.36871
KLHDC5	0.393194	26.4841	2.37878	0.0225788	0.319162	-3.36943
TUFM	0.550603	60.063	2.37824	0.0226074	0.319321	-3.37047
DDOST	0.41002	57.3765	2.37648	0.0227013	0.319414	-3.37386
XLOC_000205	-0.764744	36.1225	-2.37642	0.0227042	0.319414	-3.37396
KRBA2	-0.325175	43.2529	-2.37627	0.0227125	0.319414	-3.37426
C2orf18	0.517074	43.4529	2.37601	0.0227264	0.319414	-3.37476
MYH7B	0.592895	47.5425	2.37559	0.0227484	0.319414	-3.37555
FLJ35424	-0.74294	24.5723	-2.37546	0.0227555	0.319414	-3.37581
LOC100131248	-0.610142	32.8147	-2.37543	0.0227568	0.319414	-3.37585
BTN2A3P	-0.460099	31.7094	-2.37471	0.0227956	0.319414	-3.37725
CNDP2	0.426864	44.1152	2.37386	0.022841	0.319414	-3.37887
XLOC_009067	-0.694243	38.9865	-2.37376	0.0228462	0.319414	-3.37905
COPB2	0.37816	53.3646	2.37358	0.0228561	0.319414	-3.37941
AKR1B1	0.511688	49.7655	2.37346	0.0228625	0.319414	-3.37964
FLJ39639	-0.578139	33.3084	-2.37278	0.0228991	0.319414	-3.38095
SETD2	0.489994	29.5731	2.37257	0.0229101	0.319414	-3.38134
XLOC_l2_015098	-0.271452	15.8884	-2.37181	0.0229512	0.319414	-3.3828
SARNP	-0.475379	34.9382	-2.3717	0.0229568	0.319414	-3.383
HSD17B10	0.554995	58.4777	2.37168	0.0229578	0.319414	-3.38304
ZZZ3	0.270798	19.0817	2.37138	0.0229742	0.319414	-3.38362
U2SURP	0.357595	19.4865	2.37127	0.0229801	0.319414	-3.38383
XLOC_l2_003139	-0.349435	14.1174	-2.37106	0.0229916	0.319414	-3.38424
LOC100652772	0.511099	34.4581	2.37045	0.023024	0.319414	-3.38539
CDC42EP1	-0.624388	13.9664	-2.37037	0.0230285	0.319414	-3.38555
RPL34	-0.434754	22.2447	-2.37035	0.0230299	0.319414	-3.3856
KIAA0494	0.559601	42.1093	2.3699	0.0230542	0.319414	-3.38646
UNK	0.36618	37.6004	2.36972	0.0230635	0.319414	-3.38679
NHLRC2	0.677844	45.663	2.36812	0.0231503	0.319414	-3.38986
XLOC_003134	-0.509936	34.1052	-2.36811	0.0231508	0.319414	-3.38987
KRTAP5-4	-0.302429	13.3832	-2.36807	0.0231528	0.319414	-3.38994
MPHOSPH8	0.61463	55.0073	2.36676	0.0232239	0.319414	-3.39245
XLOC_002872	0.341653	18.5333	2.36611	0.0232592	0.319414	-3.39369
ZDHHC22	-0.484246	26.5555	-2.3661	0.0232597	0.319414	-3.39371
C8G	-0.366601	29.4395	-2.36605	0.0232628	0.319414	-3.39382
LOC100505478	0.502758	20.1395	2.36582	0.0232753	0.319414	-3.39425
PLAC9	-0.6424	30.101	-2.36514	0.0233124	0.319414	-3.39555
RNF114	0.549508	39.2556	2.36507	0.0233161	0.319414	-3.39568
MED16	0.741605	30.8522	2.36506	0.0233168	0.319414	-3.39571
WWP1	0.468178	33.2643	2.36499	0.0233202	0.319414	-3.39583
FXN	0.483546	31.1888	2.36424	0.0233613	0.319414	-3.39727
ZNF319	0.674952	29.3321	2.36422	0.0233626	0.319414	-3.39731
PIGB	-0.517439	25.3441	-2.36403	0.0233727	0.319414	-3.39766
ARMC6	0.452566	55.1596	2.36403	0.0233729	0.319414	-3.39767
ZC3H4	0.376774	38.9317	2.36326	0.023415	0.319414	-3.39914
XLOC_003883	-0.52881	37.561	-2.36311	0.0234234	0.319414	-3.39943
GCHFR	-0.405325	38.2217	-2.36301	0.0234288	0.319414	-3.39962
FCF1	0.385438	39.5394	2.36298	0.0234306	0.319414	-3.39968
CNTROB	0.625605	52.2334	2.36211	0.0234779	0.319414	-3.40133
NUP205	0.58505	48.339	2.3613	0.0235227	0.319414	-3.40288
OSTCP2	-0.408882	32.5531	-2.36087	0.0235465	0.319414	-3.40371
PCBP2	0.395579	49.1565	2.36083	0.0235483	0.319414	-3.40377
KRT18	-0.427481	28.0107	-2.36077	0.0235518	0.319414	-3.4039
LOC100133131	-0.444664	22.3863	-2.36056	0.0235634	0.319414	-3.4043
UFL1	0.275452	12.469	2.36026	0.0235799	0.319414	-3.40487
IDS	-0.420708	28.2632	-2.36013	0.0235868	0.319414	-3.40511
PARN	0.38738	44.3059	2.36011	0.0235878	0.319414	-3.40514
IRAK4	0.496974	41.6638	2.35976	0.0236074	0.319414	-3.40582
RFX5	0.443606	36.0014	2.35972	0.0236098	0.319414	-3.4059
ASCL2	0.592339	24.5369	2.35969	0.023611	0.319414	-3.40594
TANC2	0.430156	24.8688	2.35948	0.0236229	0.319414	-3.40636
XRN1	0.374201	20.1619	2.35819	0.0236944	0.319913	-3.40882
RRS1	0.428029	29.2099	2.3577	0.0237214	0.319913	-3.40975
KIAA0100	0.384402	46.5559	2.35768	0.0237223	0.319913	-3.40978
BIRC6	0.437435	27.5816	2.35755	0.0237295	0.319913	-3.41003
EVI2A	-0.51983	24.1722	-2.35717	0.0237508	0.319965	-3.41076
DIDO1	0.306581	36.7477	2.35609	0.0238105	0.320534	-3.41281
AP2S1	0.581247	88.4224	2.35543	0.0238472	0.320659	-3.41406
RAMP1	-0.611532	13.9362	-2.3552	0.0238601	0.320659	-3.41451
LOC375190	-0.532247	39.5438	-2.35498	0.0238722	0.320659	-3.41492
TNS3	0.451649	19.7752	2.35404	0.0239249	0.320814	-3.41672
MKL1	0.373507	36.9832	2.3536	0.0239495	0.320814	-3.41756
MTSS1	0.485575	26.1035	2.35294	0.0239866	0.320814	-3.41882
CHN1	-0.65901	29.3087	-2.35266	0.0240017	0.320814	-3.41933
OPA3	0.433286	38.4548	2.3525	0.024011	0.320814	-3.41965
CAMTA2	0.599674	43.4477	2.35185	0.0240473	0.320814	-3.42088
MAGEF1	0.504114	21.3646	2.35168	0.0240567	0.320814	-3.4212
SHROOM4	-0.432851	42.5299	-2.35164	0.0240593	0.320814	-3.42129
AEBP2	0.338316	15.507	2.3516	0.0240616	0.320814	-3.42137
EMILIN2	0.447532	34.231	2.35144	0.0240703	0.320814	-3.42166
GIMAP6	0.442568	41.9394	2.3513	0.0240781	0.320814	-3.42193
ZNF566	0.738457	30.5542	2.35103	0.0240933	0.320814	-3.42244
PARP1	0.449142	33.4903	2.34986	0.0241594	0.321246	-3.42467
FAM46A	0.398963	21.1541	2.34983	0.0241608	0.321246	-3.42472
XLOC_l2_000001	-0.471462	20.2979	-2.34896	0.02421	0.32147	-3.42638
ITGB2	0.303645	20.0336	2.34891	0.0242126	0.32147	-3.42647
NAA60	0.39222	46.7139	2.34758	0.024288	0.322238	-3.429
UPP1	0.524335	34.5329	2.34665	0.0243406	0.322305	-3.43077
LOC642826	-0.495111	31.546	-2.34663	0.0243419	0.322305	-3.43081
SMC1A	0.525293	33.2526	2.34656	0.0243457	0.322305	-3.43094
HSP90AB2P	0.525979	30.9748	2.34539	0.0244124	0.322772	-3.43317
CYP4F8	-0.486267	26.2902	-2.34507	0.0244303	0.322772	-3.43376
XLOC_000048	0.611833	24.0235	2.34501	0.0244338	0.322772	-3.43388
CCDC57	-0.292128	34.1598	-2.34469	0.0244519	0.322779	-3.43449
LOC100506735	-0.69263	40.7167	-2.34434	0.0244722	0.322815	-3.43516
ZKSCAN3	0.619993	33.7757	2.34328	0.0245324	0.323341	-3.43717
CEP63	-0.455931	35.0948	-2.34296	0.0245506	0.323341	-3.43777
LOC541471	-0.45352	31.6563	-2.34268	0.0245667	0.323341	-3.4383
LONRF1	0.455873	26.1404	2.3424	0.0245825	0.323341	-3.43883
XLOC_009661	0.671716	12.8537	2.34198	0.0246069	0.32343	-3.43964
XLOC_006980	-0.282356	14.9795	-2.3412	0.0246515	0.323725	-3.44111
XLOC_014174	-0.3973	22.83	-2.34097	0.0246646	0.323725	-3.44155
CKAP2	0.376246	16.596	2.3406	0.0246857	0.32377	-3.44224
CCDC84	-0.439145	41.1234	-2.33976	0.024734	0.323992	-3.44384
ELP4	0.55453	42.3594	2.33949	0.0247497	0.323992	-3.44435
XLOC_012701	-0.740135	19.4942	-2.33939	0.0247556	0.323992	-3.44455
HNRNPC	0.328428	44.8133	2.33831	0.0248175	0.324002	-3.44658
MADD	0.466363	44.4031	2.33808	0.024831	0.324002	-3.44703
DDX41	0.476477	61.3458	2.33796	0.0248378	0.324002	-3.44725
NDUFA4	-0.375615	28.0989	-2.33785	0.0248444	0.324002	-3.44747
USP28	0.607244	39.7955	2.33769	0.0248538	0.324002	-3.44777
TIMM8B	-0.426537	23.2549	-2.33754	0.0248621	0.324002	-3.44805
C14orf159	-0.43918	29.3564	-2.33606	0.0249481	0.324891	-3.45086
FAM7A3	0.618315	35.6594	2.33466	0.025029	0.325518	-3.4535
RAD54L2	0.439391	35.3831	2.33462	0.0250316	0.325518	-3.45358
TBC1D8	0.473683	19.1551	2.3336	0.0250908	0.325971	-3.4555
RAC1	0.322081	31.0483	2.33341	0.025102	0.325971	-3.45587
SNIP1	0.439008	29.6795	2.33272	0.0251424	0.326142	-3.45718
CA14	0.484214	25.5026	2.33257	0.0251507	0.326142	-3.45745
ZNF146	0.345287	29.6511	2.33222	0.0251716	0.326183	-3.45812
FARS2	0.532886	43.9138	2.33186	0.0251922	0.32622	-3.45879
OR1L6	-0.347747	30.5198	-2.33131	0.0252248	0.326412	-3.45984
LOC100652874	-0.637538	22.4767	-2.33002	0.0253004	0.327063	-3.46228
XLOC_011519	-0.432097	15.6493	-2.32984	0.0253108	0.327063	-3.46261
FUT6	-0.358639	112.745	-2.32925	0.0253455	0.327213	-3.46373
ARAP2	0.429715	30.0099	2.32904	0.025358	0.327213	-3.46413
C5orf58	0.510526	30.4314	2.32734	0.0254581	0.328173	-3.46734
SGTA	0.65633	106.974	2.32717	0.0254682	0.328173	-3.46766
SCAF1	0.477001	33.182	2.32595	0.0255405	0.328673	-3.46997
PPP1R13L	0.591409	30.195	2.32591	0.025543	0.328673	-3.47005
ATP6	0.463638	41.4551	2.32561	0.0255607	0.328673	-3.47061
ZBTB46	-0.553018	32.0818	-2.32517	0.0255867	0.328777	-3.47144
XLOC_l2_014645	-0.302298	24.703	-2.32418	0.0256451	0.329297	-3.47329
XLOC_007967	-0.358967	10.8401	-2.3232	0.0257039	0.329822	-3.47516
OCR1	-0.507552	16.8781	-2.32208	0.0257702	0.3302	-3.47725
MRPS26	0.369106	42.9164	2.32203	0.0257735	0.3302	-3.47736
ITPKB	0.461488	45.8986	2.32156	0.0258017	0.3302	-3.47825
QRICH1	0.509773	62.6796	2.32147	0.0258071	0.3302	-3.47842
MRPL17	0.428762	36.4503	2.32099	0.0258353	0.3302	-3.47931
XLOC_006404	-0.370115	30.4368	-2.32066	0.0258553	0.3302	-3.47994
RIN2	0.505776	19.3161	2.32054	0.0258624	0.3302	-3.48016
GPR107	0.408486	49.3836	2.32029	0.0258775	0.3302	-3.48064
XLOC_007235	-0.369008	22.428	-2.31977	0.0259085	0.3302	-3.48161
ST6GALNAC2	-0.562032	18.1304	-2.31949	0.0259254	0.3302	-3.48214
PGRMC2	0.459608	61.2837	2.31911	0.0259483	0.3302	-3.48286
MASP2	-0.616492	42.4018	-2.31909	0.0259492	0.3302	-3.48289
TRIM32	0.416082	37.2326	2.31873	0.025971	0.330249	-3.48357
NHP2L1	0.363144	54.5962	2.31656	0.0261016	0.33168	-3.48765
C1orf228	-0.413906	27.6929	-2.31594	0.0261392	0.331743	-3.48882
COQ10A	0.46523	36.7935	2.31588	0.0261427	0.331743	-3.48893
XLOC_009913	-0.578996	21.1556	-2.31504	0.0261939	0.332163	-3.49052
REXO1	0.338847	38.0306	2.31456	0.0262228	0.332289	-3.49142
COX6B2	-0.278019	27.4857	-2.31428	0.02624	0.332289	-3.49195
ODF3L2	-0.42978	26.9017	-2.31363	0.0262793	0.332557	-3.49317
CDK5R2	-0.414829	20.7852	-2.31305	0.0263148	0.332627	-3.49427
ZHX1	0.403563	27.3441	2.31294	0.026321	0.332627	-3.49446
LOC100652913	-0.547968	16.448	-2.312	0.0263783	0.332798	-3.49622
C9orf40	0.74697	22.3048	2.31186	0.0263872	0.332798	-3.4965
PITPNM1	0.665626	36.0773	2.31183	0.0263889	0.332798	-3.49655
TTLL8	-0.281611	12.6086	-2.31043	0.0264744	0.333647	-3.49918
ARHGAP1	0.368961	48.6003	2.30997	0.0265027	0.33371	-3.50005
PRPF19	0.373304	49.3916	2.30975	0.0265158	0.33371	-3.50045
AP3D1	0.427306	50.2804	2.30867	0.0265824	0.334191	-3.50249
DYRK2	0.388365	25.3875	2.30833	0.026603	0.334191	-3.50312
TLX2	0.5468	30.2349	2.3081	0.0266172	0.334191	-3.50355
LOC440082	-0.610666	34.3403	-2.30788	0.026631	0.334191	-3.50397
ARL11	-0.374545	20.5528	-2.30765	0.026645	0.334191	-3.5044
SF3B4	0.532934	31.3743	2.30644	0.0267196	0.334898	-3.50668
CEACAM4	-0.462893	29.2385	-2.30529	0.0267904	0.335556	-3.50883
WDR5	0.434911	47.7186	2.30459	0.0268338	0.335871	-3.51014
KLHL24	0.32403	30.697	2.30352	0.0269002	0.336342	-3.51215
FOXI2	0.56375	54.349	2.30311	0.0269257	0.336342	-3.51292
RASGRP4	-0.469812	32.8674	-2.30242	0.0269687	0.336342	-3.51421
GPATCH2	-0.339601	34.0627	-2.30238	0.0269706	0.336342	-3.51427
PHF15	0.530442	36.2543	2.30226	0.0269786	0.336342	-3.51451
LOC646626	-0.539344	23.6008	-2.30216	0.0269846	0.336342	-3.51469
C2orf50	-0.411531	22.3302	-2.30192	0.0269997	0.336342	-3.51515
XLOC_007801	-0.625651	13.7553	-2.30115	0.0270474	0.336595	-3.51658
TAS2R14	-0.533145	22.3085	-2.301	0.0270567	0.336595	-3.51686
HSD17B14	-0.33296	16.2542	-2.30066	0.027078	0.336633	-3.5175
OBFC2A	-0.381995	30.8103	-2.29995	0.0271221	0.336799	-3.51882
NOM1	0.490494	26.1247	2.29958	0.0271455	0.336799	-3.51952
RFWD3	0.623342	28.5773	2.29957	0.0271464	0.336799	-3.51955
PBX3	0.487615	35.59	2.29896	0.0271843	0.337023	-3.52068
EPB41L5	0.626436	32.7843	2.29869	0.0272012	0.337023	-3.52119
TNPO1	0.316568	44.8225	2.2982	0.027232	0.337081	-3.52211
STK24	0.366846	37.0643	2.29747	0.027278	0.337081	-3.52348
RGS4	-0.453505	45.5798	-2.2972	0.027295	0.337081	-3.52399
FAM123B	0.468583	27.571	2.29686	0.0273164	0.337081	-3.52462
ALG8	0.529549	48.0763	2.29642	0.027344	0.337081	-3.52544
GPSM1	-0.291474	26.6981	-2.2963	0.0273516	0.337081	-3.52567
TNR	-0.778662	42.2212	-2.29567	0.0273913	0.337081	-3.52684
GPR125	0.491679	24.8832	2.29545	0.027405	0.337081	-3.52725
RBBP4	0.263412	32.1748	2.2954	0.027408	0.337081	-3.52734
RDH14	0.324951	19.852	2.29502	0.0274323	0.337081	-3.52806
PIH1D2	-0.737776	32.36	-2.295	0.0274333	0.337081	-3.52809
KLF10	0.441941	18.6379	2.29463	0.0274566	0.337081	-3.52878
ECEL1P2	-0.439376	20.1762	-2.29454	0.0274624	0.337081	-3.52895
PHKB	0.423724	52.1455	2.29426	0.0274799	0.337081	-3.52947
ARFRP1	0.309731	36.4573	2.29379	0.0275098	0.337081	-3.53035
XLOC_l2_001399	-0.404477	18.7684	-2.2936	0.0275221	0.337081	-3.53071
CLK1	-0.385007	29.9784	-2.29341	0.0275339	0.337081	-3.53106
FLNB	0.631045	28.4947	2.29312	0.0275521	0.337081	-3.5316
LOC646471	0.513365	28.8051	2.29287	0.027568	0.337081	-3.53207
CD2AP	0.460132	26.9934	2.29279	0.027573	0.337081	-3.53221
POMP	0.677469	14.4684	2.29179	0.027637	0.337214	-3.53409
LOC100506844	-0.473563	39.221	-2.29134	0.0276654	0.337214	-3.53493
HEATR1	0.384281	35.9117	2.29129	0.0276688	0.337214	-3.53503
XLOC_007895	-0.253315	11.5751	-2.29104	0.0276842	0.337214	-3.53548
RALGAPB	0.380629	43.8448	2.29076	0.0277022	0.337214	-3.53601
ROBO3	-0.341336	17.2935	-2.29041	0.0277247	0.337214	-3.53667
ZNF33A	-0.523736	39.044	-2.29034	0.0277288	0.337214	-3.53679
C1orf64	-0.432001	18.7798	-2.29031	0.0277308	0.337214	-3.53684
XLOC_l2_006155	0.440269	58.134	2.28961	0.0277757	0.337324	-3.53816
FCGR2C	-0.493483	32.6055	-2.28924	0.0277994	0.337324	-3.53885
CUX1	0.307235	29.077	2.28907	0.0278099	0.337324	-3.53916
SLC4A11	-0.688476	41.9142	-2.28889	0.0278219	0.337324	-3.53951
ZNF341	0.471906	46.8922	2.28841	0.0278526	0.337324	-3.5404
PLEKHA3	0.305504	20.2019	2.28836	0.0278553	0.337324	-3.54048
LGALS12	-0.569877	25.6179	-2.28813	0.0278705	0.337324	-3.54092
XLOC_012216	-0.675885	34.9037	-2.28771	0.0278972	0.337324	-3.5417
CYP17A1	-0.486861	26.7448	-2.28744	0.0279146	0.337324	-3.54221
GNAS-AS1	-0.546962	27.7729	-2.2873	0.0279235	0.337324	-3.54247
ACOT13	-0.516328	36.533	-2.28636	0.0279837	0.337492	-3.54421
LOC100509196	-0.453473	29.1275	-2.28615	0.0279974	0.337492	-3.54461
CARD10	-0.748125	36.7475	-2.28599	0.0280077	0.337492	-3.54491
DOCK7	0.519409	32.1972	2.28594	0.028011	0.337492	-3.545
UMPS	0.423901	42.3864	2.28516	0.0280609	0.337871	-3.54645
RNF2	0.4739	35.0015	2.2847	0.0280907	0.338008	-3.54731
ZKSCAN5	0.581283	37.3333	2.28388	0.0281436	0.338315	-3.54883
ST6GALNAC5	-0.586685	26.3059	-2.28374	0.028153	0.338315	-3.54911
FASTKD5	0.348785	38.7857	2.28281	0.0282129	0.338481	-3.55083
LOC100133130	0.538079	44.7953	2.28269	0.0282205	0.338481	-3.55105
TLE6	-0.512138	23.9491	-2.28267	0.0282221	0.338481	-3.55109
PLIN4	-0.482092	14.934	-2.28209	0.0282593	0.338595	-3.55216
DNAJB1	0.547883	43.4662	2.28195	0.0282685	0.338595	-3.55243
LOC100507050	-0.482919	19.8081	-2.28095	0.0283337	0.338655	-3.55429
XLOC_008358	-0.515749	29.2604	-2.28093	0.0283347	0.338655	-3.55432
CMTM6	-0.516608	41.3905	-2.28035	0.0283726	0.338655	-3.55541
AUP1	0.556812	64.3788	2.28035	0.0283726	0.338655	-3.55541
TJAP1	0.626188	53.1527	2.2801	0.0283891	0.338655	-3.55588
GPR19	-0.571136	23.6216	-2.27923	0.0284458	0.338655	-3.5575
SUPT4H1	-0.47635	76.3401	-2.27893	0.0284653	0.338655	-3.55805
TOMM20L	-0.424774	20.2866	-2.27891	0.0284666	0.338655	-3.55809
TNRC6C	0.423855	42.6554	2.27865	0.0284837	0.338655	-3.55858
WDR36	0.370303	22.281	2.27862	0.0284857	0.338655	-3.55863
SAFB2	0.419097	47.1044	2.27829	0.0285072	0.338655	-3.55925
DHDDS	0.478091	44.2707	2.27806	0.0285222	0.338655	-3.55967
SIPA1L3	0.545814	29.9377	2.27765	0.0285489	0.338655	-3.56043
MARCH7	-0.555371	42.5923	-2.27729	0.0285726	0.338655	-3.5611
SPRYD3	0.588318	47.3544	2.27726	0.0285742	0.338655	-3.56115
MAP9	0.411169	27.9086	2.27726	0.0285744	0.338655	-3.56116
RRP8	0.457287	62.011	2.27707	0.0285871	0.338655	-3.56151
GJD4	-0.385222	51.2791	-2.27649	0.0286248	0.338884	-3.56258
DDX47	0.328466	38.1714	2.2762	0.0286436	0.338888	-3.56312
UQCRFS1	0.37121	45.0526	2.27573	0.0286747	0.339037	-3.56399
ANKRD17	0.42292	31.1929	2.27533	0.0287012	0.339093	-3.56474
IQCD	-0.630194	31.1985	-2.2751	0.0287163	0.339093	-3.56517
SLC25A13	0.396416	33.2971	2.27437	0.0287641	0.339382	-3.56652
LOC100505902	-0.528358	28.1438	-2.27414	0.0287796	0.339382	-3.56696
ZNF415	0.671326	11.402	2.27388	0.0287963	0.339382	-3.56742
LUC7L2	0.38041	39.5683	2.27294	0.0288583	0.339385	-3.56917
YWHAZ	0.369403	47.0826	2.27257	0.0288833	0.339385	-3.56987
FLJ37786	-0.539734	42.0384	-2.27247	0.0288898	0.339385	-3.57005
POLD2	0.520491	31.9126	2.27214	0.0289112	0.339385	-3.57065
NUP153	0.281904	19.3493	2.27206	0.0289171	0.339385	-3.57082
CCDC153	-0.640878	21.469	-2.27202	0.0289192	0.339385	-3.57088
XLOC_013615	-0.357896	27.7971	-2.27192	0.0289259	0.339385	-3.57107
SERPINB8	0.471962	25.0314	2.2715	0.0289541	0.339498	-3.57185
LOC283861	-0.474077	17.1943	-2.27042	0.0290254	0.339693	-3.57385
TXLNB	0.606737	17.2988	2.27028	0.0290345	0.339693	-3.5741
PARP11	0.451231	27.582	2.27017	0.0290421	0.339693	-3.57431
SMG9	0.622614	38.3172	2.26994	0.0290574	0.339693	-3.57474
PINX1	0.582746	48.1126	2.26985	0.0290631	0.339693	-3.5749
BPTF	0.510811	26.337	2.26946	0.0290896	0.339786	-3.57564
TRIM66	-0.452123	19.4051	-2.26914	0.0291105	0.339813	-3.57622
LOC100289333	0.62556	29.8488	2.26886	0.0291296	0.339821	-3.57675
XLOC_l2_003757	-0.707477	36.2491	-2.26764	0.0292109	0.34029	-3.57901
LOC729737	-0.471048	23.0553	-2.26717	0.0292421	0.34029	-3.57987
XLOC_l2_014720	0.415496	47.4707	2.26698	0.0292546	0.34029	-3.58022
TNNI2	-0.575178	24.5379	-2.26686	0.0292625	0.34029	-3.58044
KIAA2018	0.383656	18.4593	2.2665	0.0292867	0.34029	-3.58111
NCALD	0.703061	28.3023	2.26646	0.0292899	0.34029	-3.5812
VARS	0.408471	38.2241	2.26631	0.0292996	0.34029	-3.58147
RRM1	0.335708	25.6985	2.26587	0.0293291	0.340418	-3.58228
INO80D	0.289171	27.6153	2.26558	0.0293488	0.340432	-3.58283
PMEPA1	0.554471	24.3374	2.2648	0.029401	0.340609	-3.58426
SNORD22	-0.561491	18.2682	-2.2648	0.0294012	0.340609	-3.58427
TMEM214	0.358533	52.8048	2.26431	0.0294337	0.340677	-3.58516
LRCH3	0.4352	46.0619	2.26416	0.0294442	0.340677	-3.58545
XLOC_005188	-0.488916	19.0193	-2.26287	0.0295309	0.341464	-3.58783
XLOC_007268	-0.586933	16.2972	-2.26172	0.0296083	0.342083	-3.58995
C2orf44	0.525008	42.5558	2.26142	0.0296289	0.342083	-3.59052
LOC100505894	-0.486868	28.2055	-2.26117	0.0296457	0.342083	-3.59098
DENND1A	0.375943	31.4396	2.26098	0.0296589	0.342083	-3.59134
C12orf32	0.472555	22.4684	2.25974	0.029743	0.342803	-3.59363
CNP	0.463062	32.2014	2.25925	0.0297762	0.342803	-3.59453
YTHDF2	0.336435	45.1815	2.25907	0.029788	0.342803	-3.59485
XLOC_l2_011873	-0.362203	25.0417	-2.25874	0.0298105	0.342803	-3.59546
DDX27	0.500478	46.1327	2.25836	0.0298363	0.342803	-3.59617
LOC338799	-0.39822	32.5669	-2.25806	0.0298567	0.342803	-3.59672
DKFZP434F142	-0.346806	25.2665	-2.25788	0.0298691	0.342803	-3.59705
PPFIBP1	0.451378	32.8387	2.25786	0.0298707	0.342803	-3.5971
LOC440297	-0.408761	29.9073	-2.25688	0.0299372	0.343101	-3.5989
FLJ45079	-0.624381	37.5637	-2.25653	0.0299612	0.343101	-3.59954
BAG4	0.398839	24.6967	2.25644	0.0299675	0.343101	-3.59972
SEMA4C	0.577363	43.3084	2.25638	0.0299714	0.343101	-3.59982
XLOC_008613	-0.551527	38.1757	-2.25452	0.0300987	0.344344	-3.60325
FBXO38	0.421129	46.291	2.25362	0.0301611	0.344452	-3.60493
C5orf43	-0.445264	42.3641	-2.25335	0.0301793	0.344452	-3.60541
HMGB1	-0.444081	37.5372	-2.25325	0.0301862	0.344452	-3.6056
CBX3	-0.379254	38.2074	-2.2532	0.0301899	0.344452	-3.6057
CHEK2	0.369721	29.3865	2.25287	0.0302126	0.344452	-3.60631
XLOC_007189	0.572799	15.9842	2.25216	0.0302614	0.344452	-3.60761
HSPH1	0.593286	31.7012	2.25205	0.0302689	0.344452	-3.60781
SLMO2	0.422545	25.5425	2.25183	0.030284	0.344452	-3.60822
ENY2	-0.407013	42.5911	-2.25172	0.0302916	0.344452	-3.60842
RREB1	0.325808	30.0709	2.25149	0.0303076	0.344452	-3.60885
TGFA	0.567191	30.8737	2.25139	0.0303145	0.344452	-3.60903
ATP1A1	0.47143	39.3601	2.25079	0.030356	0.344697	-3.61014
C14orf41	-0.826738	35.6165	-2.25051	0.0303751	0.344697	-3.61065
RASGEF1B	0.52971	24.6965	2.24997	0.0304125	0.344697	-3.61164
GPD2	0.46177	24.08	2.24988	0.0304186	0.344697	-3.6118
RPL26	-0.393713	33.4589	-2.24959	0.0304392	0.344697	-3.61235
PCM1	0.326548	39.104	2.24925	0.0304623	0.344697	-3.61297
XLOC_004346	-0.285054	12.0972	-2.24918	0.0304674	0.344697	-3.6131
XLOC_012005	-0.304826	19.0704	-2.24871	0.0305004	0.344857	-3.61398
ARHGAP25	-0.350164	42.8911	-2.24794	0.0305536	0.345247	-3.61539
SLC5A10	-0.592359	25.9348	-2.24747	0.0305866	0.345406	-3.61626
UNC5CL	-0.549101	34.2577	-2.24687	0.0306279	0.345581	-3.61735
BACH2	0.39716	19.659	2.24629	0.0306685	0.345581	-3.61842
PMP22	-0.664154	13.9491	-2.24621	0.0306742	0.345581	-3.61857
FAM206A	-0.48948	35.8685	-2.24616	0.0306773	0.345581	-3.61865
LCMT2	0.320435	26.2759	2.24565	0.0307131	0.345772	-3.6196
REL	0.583878	38.7784	2.24519	0.0307456	0.345872	-3.62045
ZDHHC4	0.511393	48.9099	2.24484	0.0307697	0.345872	-3.62109
C17orf69	0.45702	24.5912	2.24453	0.0307912	0.345872	-3.62165
PRR21	-0.51394	18.002	-2.24445	0.0307973	0.345872	-3.62181
MFAP1	0.342817	44.2578	2.24401	0.0308278	0.346002	-3.62261
PPRC1	0.307763	35.6915	2.24224	0.0309521	0.346981	-3.62586
SIDT1	0.595487	38.4404	2.24222	0.0309539	0.346981	-3.62591
ND4L	0.47936	40.9687	2.24184	0.0309804	0.346981	-3.6266
PDE4D	-0.401697	22.9352	-2.24166	0.0309932	0.346981	-3.62694
NID2	-0.456927	24.4371	-2.24143	0.0310095	0.346981	-3.62736
XLOC_001020	-0.375597	11.656	-2.24042	0.0310808	0.347568	-3.62922
PIAS4	0.488	31.3096	2.23995	0.0311135	0.347722	-3.63007
LOC440993	-0.57364	20.6392	-2.23936	0.0311557	0.3478	-3.63116
B3GALNT1	-0.364293	19.579	-2.23832	0.0312289	0.3478	-3.63306
PIGX	-0.407777	20.511	-2.23821	0.0312371	0.3478	-3.63327
XLOC_005854	-0.457866	25.8957	-2.23764	0.0312772	0.3478	-3.63431
CNIH4	0.420941	33.7741	2.23753	0.031285	0.3478	-3.63451
GIMAP1	0.462725	48.9961	2.2369	0.0313301	0.3478	-3.63567
FLII	0.394144	46.0938	2.2368	0.031337	0.3478	-3.63585
TMEM184C	0.405269	32.5719	2.23676	0.0313401	0.3478	-3.63593
XLOC_l2_013153	-0.514925	22.4513	-2.23663	0.031349	0.3478	-3.63616
NUFIP1	0.705339	32.0515	2.23663	0.0313493	0.3478	-3.63617
XLOC_l2_000941	-0.412205	26.3864	-2.23657	0.0313531	0.3478	-3.63627
SPAG8	-0.478815	25.1136	-2.23654	0.0313554	0.3478	-3.63632
BARD1	0.543046	25.7167	2.23638	0.0313667	0.3478	-3.63662
SNX18	-0.448737	23.0833	-2.23597	0.0313963	0.347805	-3.63738
CD2BP2	0.42204	47.7629	2.23544	0.0314338	0.347805	-3.63834
MAD1L1	0.659423	27.9013	2.23528	0.0314451	0.347805	-3.63863
SGK223	0.425294	29.1232	2.23508	0.0314593	0.347805	-3.639
ACBD3	0.449886	28.1378	2.2349	0.0314727	0.347805	-3.63934
GPHN	0.525446	24.7437	2.23453	0.0314986	0.347805	-3.64001
C12orf43	0.513673	45.1115	2.23452	0.0314998	0.347805	-3.64004
CD302	-0.471541	31.6601	-2.23336	0.0315828	0.348511	-3.64216
EEF1E1	-0.328234	22.2609	-2.23261	0.0316362	0.348891	-3.64353
MYH9	0.320595	24.6659	2.23215	0.0316692	0.349045	-3.64437
TPI1P2	0.532413	84.9028	2.23158	0.0317106	0.349242	-3.64542
C9orf89	-0.579598	71.2372	-2.23137	0.0317251	0.349242	-3.64579
SMU1	0.505448	55.1911	2.23107	0.0317473	0.349278	-3.64636
VSIG8	-0.632008	16.7143	-2.22968	0.0318471	0.349834	-3.64889
LOC100506007	0.683984	19.6234	2.22947	0.0318623	0.349834	-3.64928
MGC12982	0.495722	29.358	2.22887	0.0319061	0.349834	-3.65039
XLOC_004470	-0.293146	12.4705	-2.22855	0.0319285	0.349834	-3.65095
LOC284454	-0.473291	27.7071	-2.22796	0.0319719	0.349834	-3.65205
MSRB3	0.506344	22.8754	2.22742	0.032011	0.349834	-3.65304
ZRANB3	0.509474	41.7133	2.22736	0.0320148	0.349834	-3.65313
SCARNA20	-0.347425	20.3411	-2.22719	0.0320274	0.349834	-3.65345
NR3C2	0.414418	26.2562	2.22702	0.0320397	0.349834	-3.65376
MPZL3	-0.38659	26.1705	-2.22701	0.0320407	0.349834	-3.65379
DUSP5	0.423261	15.1406	2.22697	0.0320431	0.349834	-3.65385
FDPSL2A	0.549224	69.7487	2.22674	0.0320602	0.349834	-3.65428
SLC20A2	0.324945	38.0093	2.22631	0.0320914	0.349834	-3.65506
LOC100652787	-0.66355	36.4135	-2.2263	0.0320917	0.349834	-3.65507
ARMCX6	0.434452	43.0202	2.22616	0.0321018	0.349834	-3.65532
PPIL3	-0.522067	26.5158	-2.22615	0.0321027	0.349834	-3.65535
KIFAP3	0.367462	31.0224	2.22549	0.0321506	0.34995	-3.65655
XLOC_l2_015397	-0.321674	46.6978	-2.22548	0.0321515	0.34995	-3.65657
CCT4	0.324575	44.8543	2.22512	0.0321779	0.35003	-3.65724
LRFN3	0.493781	23.2489	2.22467	0.0322106	0.350162	-3.65806
C9orf72	-0.441773	23.4445	-2.22443	0.0322282	0.350162	-3.6585
ATF5	0.407734	24.5855	2.22414	0.0322496	0.350187	-3.65903
UBA1	0.397646	37.583	2.22282	0.032346	0.350755	-3.66144
LOC653712	-0.532613	28.2157	-2.22166	0.0324304	0.350755	-3.66354
RCE1	0.564949	42.7756	2.2216	0.0324352	0.350755	-3.66366
LOC100289038	-0.296211	11.7554	-2.22154	0.0324394	0.350755	-3.66377
RASGRF2	0.600721	36.98	2.22141	0.0324489	0.350755	-3.664
GABRP	-0.278666	15.9955	-2.22112	0.0324706	0.350755	-3.66454
TMEM79	0.497568	40.3831	2.22093	0.0324841	0.350755	-3.66488
STK10	0.349792	42.8794	2.22061	0.0325077	0.350755	-3.66546
PPIL4	-0.454361	38.3478	-2.21986	0.032563	0.350755	-3.66684
SUPT6H	0.360447	41.5961	2.21982	0.0325659	0.350755	-3.66691
CLEC7A	-0.466858	26.5826	-2.21979	0.0325683	0.350755	-3.66697
XLOC_001897	-0.523816	28.4527	-2.21976	0.0325701	0.350755	-3.66701
KAZALD1	0.619336	25.6306	2.21973	0.0325727	0.350755	-3.66708
LAMA5	-0.386444	41.764	-2.21946	0.0325925	0.350755	-3.66757
LEO1	0.405013	38.5046	2.21926	0.0326074	0.350755	-3.66794
CAMK1D	-0.580432	28.7543	-2.21903	0.0326243	0.350755	-3.66835
TMEM87B	0.444027	28.9402	2.21894	0.0326304	0.350755	-3.6685
RARS2	-0.413928	39.9111	-2.21874	0.0326457	0.350755	-3.66888
LHFP	-0.560785	20.119	-2.21758	0.0327311	0.351467	-3.67099
ZNF609	0.618895	35.9769	2.21664	0.032801	0.352012	-3.67271
CLPTM1	0.58392	40.3553	2.21631	0.0328248	0.352062	-3.6733
ZNF273	-0.400343	28.9761	-2.21496	0.0329258	0.352926	-3.67577
KEAP1	0.432321	58.0233	2.21471	0.0329439	0.352926	-3.67622
UCP2	0.597523	47.5752	2.21356	0.0330297	0.353639	-3.67831
FAM174A	-0.346076	15.7281	-2.21248	0.0331102	0.353916	-3.68028
TLR6	-0.584746	28.0077	-2.21226	0.0331264	0.353916	-3.68067
P39194	-0.372613	24.7796	-2.21207	0.0331407	0.353916	-3.68102
LOC100132363	-0.389012	23.0849	-2.21162	0.0331745	0.353916	-3.68184
CAMK2D	0.503013	32.3073	2.21145	0.0331876	0.353916	-3.68216
KRTAP2-1	-0.299268	13.4194	-2.21142	0.0331895	0.353916	-3.6822
GTPBP4	0.366686	37.2565	2.21141	0.0331904	0.353916	-3.68223
SHISA8	-0.469972	22.6614	-2.21039	0.0332664	0.353958	-3.68407
ATP2B3	-0.443418	25.496	-2.21032	0.0332722	0.353958	-3.68421
FAM114A2	0.512733	30.4309	2.21027	0.0332758	0.353958	-3.6843
EML2	0.580032	36.3268	2.21018	0.0332822	0.353958	-3.68445
XLOC_l2_015697	0.826571	32.867	2.20961	0.0333253	0.353958	-3.6855
XLOC_001699	-0.712543	14.4775	-2.20956	0.0333287	0.353958	-3.68558
ACER3	0.609382	29.8663	2.20956	0.0333294	0.353958	-3.68559
APEX1	0.480164	49.5044	2.20924	0.0333531	0.354006	-3.68617
TRMT6	0.346562	31.8575	2.20882	0.0333843	0.354132	-3.68692
ACTG1	0.418668	38.7621	2.2083	0.0334236	0.35427	-3.68787
APLP2	0.359932	35.6843	2.20814	0.0334359	0.35427	-3.68817
CST2	-0.648002	30.4978	-2.20763	0.0334746	0.354475	-3.6891
LOC729178	-0.308051	30.0807	-2.20674	0.0335417	0.354738	-3.69071
ACSL5	0.419299	41.8924	2.20658	0.0335538	0.354738	-3.691
XLOC_008769	-0.596095	19.01	-2.20653	0.0335573	0.354738	-3.69109
WDR93	-0.287589	17.455	-2.20589	0.0336062	0.354803	-3.69226
EP400	0.332021	23.9953	2.20548	0.0336367	0.354803	-3.69299
IQGAP1	0.441372	32.6083	2.2052	0.0336579	0.354803	-3.6935
MED30	0.410735	32.0197	2.2052	0.033658	0.354803	-3.6935
XLOC_001561	-0.55282	37.2422	-2.20517	0.0336601	0.354803	-3.69355
PTPRVP	-0.534686	28.9402	-2.20327	0.0338051	0.355524	-3.69701
LOC100132831	0.489579	50.7892	2.20266	0.0338515	0.355524	-3.69812
MTHFD1	0.466517	36.5495	2.20251	0.0338627	0.355524	-3.69838
PRPF38A	0.370556	40.7742	2.20175	0.0339203	0.355524	-3.69975
CARNS1	0.674676	29.6103	2.20118	0.0339639	0.355524	-3.70079
PACRGL	-0.52597	29.8857	-2.20111	0.0339695	0.355524	-3.70092
PCSK5	0.457484	29.1948	2.20106	0.0339731	0.355524	-3.70101
PYGB	0.610085	36.2962	2.19966	0.0340807	0.355524	-3.70355
LOC100505771	-0.298837	27.8799	-2.19963	0.0340824	0.355524	-3.70359
XLOC_010077	0.5522	31.8256	2.19958	0.0340864	0.355524	-3.70369
HSPA4	0.435492	49.4285	2.1994	0.0341005	0.355524	-3.70402
PLEKHA8	0.623866	26.4119	2.19916	0.0341186	0.355524	-3.70445
NOP58	-0.381215	36.1211	-2.1991	0.0341232	0.355524	-3.70456
XLOC_012505	-0.312581	29.1611	-2.19902	0.0341295	0.355524	-3.7047
C6orf136	0.616857	54.1897	2.19885	0.0341423	0.355524	-3.70501
LHFPL2	0.45102	20.8358	2.19884	0.0341435	0.355524	-3.70504
C17orf65	-0.297476	14.9087	-2.1988	0.0341466	0.355524	-3.70511
GNL1	0.42599	45.986	2.19874	0.0341507	0.355524	-3.70521
CCDC12	0.300804	70.5965	2.19862	0.0341599	0.355524	-3.70542
LOC158960	-0.725614	45.2674	-2.1985	0.0341692	0.355524	-3.70564
LOC386597	0.531276	27.9608	2.19849	0.0341701	0.355524	-3.70566
SPNS3	-0.640196	22.0069	-2.19844	0.0341737	0.355524	-3.70575
SLC31A1	0.459744	28.375	2.19844	0.0341739	0.355524	-3.70575
TRIM68	0.488866	30.6605	2.19772	0.0342295	0.355537	-3.70706
XLOC_002565	-0.560023	30.5619	-2.19716	0.0342725	0.355537	-3.70807
UHMK1	0.480187	45.2479	2.19705	0.0342807	0.355537	-3.70827
SCNN1D	-0.445129	34.3938	-2.19692	0.0342908	0.355537	-3.7085
LOC643802	-0.485504	19.6974	-2.19675	0.0343041	0.355537	-3.70881
RSF1	0.444325	30.6797	2.19671	0.034307	0.355537	-3.70888
CACNG4	0.562565	33.9805	2.19667	0.0343106	0.355537	-3.70897
C1orf162	0.582935	55.2672	2.19635	0.0343349	0.355588	-3.70954
PIK3R4	0.546319	30.0652	2.19555	0.0343967	0.355832	-3.71098
CPOX	0.361776	15.6978	2.19554	0.0343973	0.355832	-3.711
POGZ	0.301371	38.0727	2.19529	0.0344167	0.355833	-3.71145
LOC100129104	-0.441418	33.3353	-2.19415	0.0345049	0.356495	-3.71351
XLOC_013064	-0.495418	18.0648	-2.19381	0.0345315	0.356495	-3.71413
LOC100652843	-0.487497	38.8284	-2.19321	0.0345778	0.356495	-3.71521
SMAD3	0.399408	33.2013	2.193	0.0345946	0.356495	-3.7156
FMO6P	0.511552	29.5482	2.19291	0.0346017	0.356495	-3.71577
GRIN3A	0.484163	16.318	2.19267	0.0346197	0.356495	-3.71618
MUTYH	0.479466	45.2024	2.19256	0.0346283	0.356495	-3.71639
LOC100508384	-0.356046	21.0114	-2.19157	0.0347057	0.356495	-3.71818
XLOC_000101	-0.471774	25.1245	-2.19136	0.0347223	0.356495	-3.71857
EMP2	-0.842627	43.1515	-2.1913	0.0347268	0.356495	-3.71867
MUL1	0.61262	76.3271	2.19122	0.0347327	0.356495	-3.71881
XLOC_l2_009762	-0.309505	11.0493	-2.19114	0.0347393	0.356495	-3.71896
PSMC5	0.443886	62.9373	2.19032	0.034803	0.356495	-3.72043
UBAP2	0.395676	40.7679	2.19018	0.0348142	0.356495	-3.72069
PSTPIP2	0.50772	23.4224	2.19003	0.0348258	0.356495	-3.72096
PI4KAP1	-0.660108	28.4076	-2.18999	0.034829	0.356495	-3.72104
LOC283887	0.670338	26.5191	2.1893	0.0348826	0.356495	-3.72227
CCT6A	0.435012	41.4111	2.18928	0.0348848	0.356495	-3.72232
GAPVD1	0.338719	32.5135	2.18906	0.0349014	0.356495	-3.72271
MAPKAP1	0.368401	41.8329	2.18898	0.0349082	0.356495	-3.72286
LOC100506053	-0.469765	32.4996	-2.18863	0.0349352	0.356495	-3.72349
ANXA2P1	0.445757	32.2282	2.18858	0.034939	0.356495	-3.72357
RNF8	0.503386	40.3485	2.18854	0.0349425	0.356495	-3.72365
SMPD1	0.639037	31.598	2.18844	0.0349498	0.356495	-3.72382
LOC100129324	-0.471498	19.7143	-2.18824	0.0349661	0.356495	-3.7242
TMSB10	0.437445	62.1574	2.18719	0.0350486	0.357138	-3.72609
C15orf40	-0.404299	36.1509	-2.18683	0.0350769	0.357228	-3.72674
IL21R	0.484872	33.6594	2.18633	0.0351162	0.35743	-3.72764
DHX33	0.58547	30.7926	2.18576	0.0351605	0.357644	-3.72866
SLC27A4	0.590751	34.0739	2.18507	0.0352155	0.357644	-3.72991
SNORA67	-0.378851	28.8347	-2.18498	0.0352223	0.357644	-3.73007
GGCX	0.490065	31.0558	2.1846	0.0352524	0.357644	-3.73076
KANSL3	0.442486	32.7074	2.1846	0.0352525	0.357644	-3.73076
XLOC_004557	-0.555597	28.7562	-2.18458	0.0352541	0.357644	-3.73079
LOC100128333	-0.477474	21.5109	-2.18419	0.0352847	0.357757	-3.73149
NRBP1	0.562756	67.7922	2.18372	0.0353221	0.357791	-3.73234
GDF11	0.58434	27.9976	2.18366	0.035327	0.357791	-3.73246
TCF7L2	0.378881	28.3697	2.18271	0.0354023	0.358066	-3.73417
CLP1	0.50337	39.0965	2.18265	0.0354068	0.358066	-3.73427
RPL31	-0.346121	24.1747	-2.18219	0.0354433	0.358066	-3.7351
TMEM174	-0.620966	43.4302	-2.18206	0.0354537	0.358066	-3.73533
XLOC_001641	-0.365348	27.8433	-2.18178	0.0354755	0.358066	-3.73583
SAMM50	0.456133	48.4271	2.18161	0.0354891	0.358066	-3.73614
ADNP2	0.53034	35.6485	2.18159	0.0354907	0.358066	-3.73617
FAM160B2	0.386868	38.6999	2.18134	0.0355105	0.358069	-3.73662
XLOC_l2_008733	-0.609748	35.8746	-2.18066	0.0355649	0.358349	-3.73785
WHSC1	0.281365	31.2997	2.18048	0.0355795	0.358349	-3.73818
FMNL1	0.311819	31.5869	2.18026	0.0355968	0.358349	-3.73857
NDUFA11	0.345875	67.3929	2.1795	0.0356572	0.358755	-3.73993
PIK3AP1	0.40151	19.1108	2.17915	0.0356855	0.358755	-3.74057
CNO	0.480209	25.8897	2.17902	0.0356957	0.358755	-3.7408
NSUN7	-0.505485	14.0507	-2.1785	0.0357372	0.358829	-3.74174
NGEF	-0.686816	41.7845	-2.17844	0.0357422	0.358829	-3.74185
LOC100506681	-0.415852	25.7502	-2.17804	0.0357743	0.358955	-3.74257
ATP2A2	0.371317	29.7398	2.17777	0.0357956	0.358973	-3.74305
EIF2AK4	0.528095	37.0057	2.17743	0.0358224	0.358986	-3.74365
XLOC_l2_009467	-0.474087	22.3637	-2.17705	0.0358533	0.358986	-3.74434
C22orf28	0.535717	40.0564	2.17634	0.0359103	0.358986	-3.74562
XLOC_009723	-0.557748	20.0173	-2.17616	0.0359246	0.358986	-3.74594
GMDS	0.505111	39.5479	2.17603	0.0359349	0.358986	-3.74617
LOC100129534	-0.343562	16.4263	-2.176	0.0359376	0.358986	-3.74623
XLOC_009663	-0.391019	17.9548	-2.17595	0.0359416	0.358986	-3.74632
ZNF212	0.385714	45.332	2.17564	0.0359666	0.358986	-3.74688
XLOC_002172	-0.453389	25.2831	-2.17527	0.0359962	0.358986	-3.74754
HNRNPD	0.290044	40.2825	2.17499	0.0360188	0.358986	-3.74804
MIF4GD	0.576629	37.5219	2.1749	0.0360258	0.358986	-3.7482
CHRNA7	-0.555449	15.3516	-2.17443	0.0360639	0.358986	-3.74905
ATP13A1	0.398023	32.635	2.17423	0.0360797	0.358986	-3.7494
LOC100652741	-0.390588	38.6193	-2.17416	0.0360853	0.358986	-3.74953
CRYM	-0.506462	16.534	-2.17396	0.0361022	0.358986	-3.7499
C20orf24	-0.394884	47.9333	-2.17386	0.0361098	0.358986	-3.75007
CLK2	0.570264	46.352	2.17177	0.0362788	0.360444	-3.75382
HSPA1A	0.418682	26.5123	2.17156	0.0362956	0.360444	-3.75419
ZIC5	-0.497964	14.2898	-2.16938	0.0364731	0.361746	-3.75811
DNAL1	-0.788063	39.2819	-2.16929	0.0364801	0.361746	-3.75827
LPXN	0.608084	54.9145	2.16922	0.0364859	0.361746	-3.75839
LOC100505717	0.582929	31.9347	2.16885	0.0365161	0.36185	-3.75906
KLHL33	-0.301157	22.8287	-2.16786	0.0365969	0.362455	-3.76083
OPLAH	-0.552332	18.8202	-2.16715	0.0366549	0.362834	-3.7621
XLOC_002701	0.536265	33.4387	2.16656	0.0367036	0.362988	-3.76317
RALGAPA1	0.360815	36.8372	2.16648	0.03671	0.362988	-3.76331
EHD1	0.431392	63.1186	2.16569	0.0367742	0.363081	-3.76471
GEMIN5	0.485918	32.2365	2.16567	0.0367759	0.363081	-3.76475
ZBTB5	0.31825	32.876	2.16564	0.0367787	0.363081	-3.76481
IER3IP1	0.256356	17.2611	2.16501	0.0368301	0.3632	-3.76593
XLOC_005678	-0.45414	21.8942	-2.16501	0.0368303	0.3632	-3.76594
C17orf74	-0.524582	29.8208	-2.16473	0.0368532	0.36323	-3.76643
SARS	0.337203	48.473	2.16442	0.0368786	0.363286	-3.76699
STAU1	0.428735	35.3771	2.16344	0.0369591	0.363883	-3.76874
SNORD12B	-0.501491	25.5943	-2.16222	0.0370598	0.364679	-3.77092
MLEC	0.519159	43.1916	2.16068	0.0371871	0.365691	-3.77367
ZSWIM6	-0.278441	26.1679	-2.15994	0.0372491	0.365691	-3.77501
RIPK1	0.475141	53.8921	2.1597	0.0372689	0.365691	-3.77544
GIT2	0.297561	36.3338	2.15926	0.0373051	0.365691	-3.77621
DNAJC11	0.31683	49.3644	2.15883	0.0373409	0.365691	-3.77698
ZXDB	0.291542	26.8326	2.15868	0.0373535	0.365691	-3.77725
LOC100287718	0.279233	23.1017	2.15866	0.037355	0.365691	-3.77729
OR2A2	-0.5143	30.9491	-2.15861	0.0373594	0.365691	-3.77738
MIPEP	0.413779	41.1224	2.1586	0.0373604	0.365691	-3.7774
IK	0.416228	77.3183	2.15833	0.0373828	0.365691	-3.77788
KARS	0.448822	59.4827	2.15826	0.0373883	0.365691	-3.778
CPT1A	0.574411	24.8766	2.1581	0.0374016	0.365691	-3.77829
GBAS	0.291174	21.5005	2.15735	0.0374638	0.366058	-3.77962
SLC17A4	-0.330346	14.0403	-2.15717	0.037479	0.366058	-3.77994
XLOC_013898	0.644318	35.1851	2.15604	0.0375737	0.366788	-3.78197
LOC100505644	-0.349917	17.9149	-2.15577	0.0375958	0.366809	-3.78244
PRPS1	0.399838	42.4775	2.15442	0.0377095	0.367689	-3.78486
FCN1	0.415945	31.7665	2.15398	0.0377461	0.367689	-3.78564
DOCK10	0.319814	24.2789	2.15392	0.0377514	0.367689	-3.78575
B2M	-0.312859	47.6769	-2.15356	0.0377811	0.367689	-3.78638
PIGT	0.424664	54.5352	2.1535	0.0377862	0.367689	-3.78649
MED20	0.317443	26.9659	2.15223	0.0378931	0.368269	-3.78876
KBTBD2	0.317091	17.6829	2.15209	0.037905	0.368269	-3.78901
LZTS2	0.310694	34.235	2.15208	0.0379059	0.368269	-3.78903
BAIAP3	-0.520523	14.747	-2.15181	0.0379288	0.368295	-3.78951
NUP107	0.319406	25.9057	2.1515	0.0379547	0.368295	-3.79006
LRMP	-0.403144	40.5208	-2.15133	0.0379687	0.368295	-3.79035
SLC29A2	-0.630887	30.4426	-2.15034	0.0380526	0.36843	-3.79212
CDC37	0.56427	60.0339	2.15031	0.0380548	0.36843	-3.79217
XLOC_l2_007986	-0.392137	22.7574	-2.15	0.0380818	0.36843	-3.79274
FLJ41649	-0.673111	22.6764	-2.14995	0.0380856	0.36843	-3.79282
TRPC6	0.511579	28.9465	2.14937	0.0381349	0.36843	-3.79386
ALG3	0.527454	54.8662	2.14929	0.0381416	0.36843	-3.794
XLOC_l2_015034	-0.563559	30.3943	-2.14919	0.0381499	0.36843	-3.79417
PTPN6	0.419174	48.8727	2.14902	0.0381645	0.36843	-3.79448
PSMA2	-0.389092	40.1568	-2.14862	0.0381985	0.36843	-3.79519
PER2	0.438102	33.2789	2.14839	0.0382179	0.36843	-3.7956
GAR1	0.394124	50.2714	2.14814	0.0382386	0.36843	-3.79603
C3orf71	0.516013	37.0726	2.14772	0.0382747	0.36843	-3.79679
RBM15B	-0.586526	34.4677	-2.14766	0.0382801	0.36843	-3.7969
LOC100652917	-0.583741	26.7614	-2.14749	0.0382946	0.36843	-3.7972
XLOC_000502	-0.353387	19.7372	-2.14727	0.0383126	0.36843	-3.79758
ARPC3	-0.375885	62.7305	-2.14715	0.0383233	0.36843	-3.7978
LCP1	0.264347	45.5586	2.14697	0.0383383	0.36843	-3.79812
MBOAT7	-0.353913	35.474	-2.14682	0.0383513	0.36843	-3.79839
XLOC_008998	-0.442782	22.9941	-2.14648	0.0383805	0.36843	-3.799
XLOC_003327	0.606374	18.3496	2.14643	0.038384	0.36843	-3.79907
AMDHD2	-0.574782	35.3012	-2.14589	0.03843	0.368679	-3.80003
XLOC_l2_012154	0.440837	39.5279	2.1454	0.0384721	0.36889	-3.80091
BLMH	0.448539	38.8556	2.14309	0.0386698	0.370592	-3.80501
XLOC_008610	-0.619764	25.3442	-2.14264	0.0387086	0.370771	-3.80582
PIAS3	0.469021	48.803	2.14203	0.0387612	0.371081	-3.80691
TAF3	0.424425	30.4967	2.14178	0.0387825	0.371092	-3.80735
FLJ45445	-0.426768	35.2319	-2.14033	0.0389074	0.37136	-3.80992
SEMA3B	-0.551254	25.0115	-2.14029	0.0389103	0.37136	-3.80998
SLC38A11	0.619456	15.8389	2.14026	0.0389128	0.37136	-3.81003
FRYL	0.471065	31.939	2.14012	0.0389254	0.37136	-3.81029
FZD3	0.579008	35.2352	2.1398	0.038953	0.37136	-3.81086
NCBP2	0.386517	19.833	2.13964	0.0389671	0.37136	-3.81115
DYNLRB1	0.413578	62.4128	2.13954	0.0389752	0.37136	-3.81131
AXIN2	0.370739	17.4173	2.13918	0.0390061	0.37136	-3.81195
JARID2	-0.411405	35.9763	-2.13917	0.0390076	0.37136	-3.81198
CHST12	0.448115	25.4202	2.13891	0.0390301	0.37136	-3.81244
MDC1	0.424518	35.4008	2.13887	0.0390333	0.37136	-3.81251
RBM4B	0.489399	39.3657	2.13864	0.0390533	0.37136	-3.81292
XLOC_010372	-0.487995	20.8082	-2.13817	0.039094	0.371489	-3.81375
ZSCAN29	0.420114	33.3936	2.13801	0.0391074	0.371489	-3.81403
RTN4IP1	0.435708	41.6121	2.1362	0.0392645	0.372599	-3.81724
CAPN7	-0.419739	26.8842	-2.1362	0.0392647	0.372599	-3.81724
MICALL1	0.568033	31.7131	2.13575	0.0393039	0.372778	-3.81804
XLOC_011102	0.649891	45.7491	2.13517	0.0393542	0.373063	-3.81906
MRPL3	-0.292882	23.5353	-2.13487	0.0393804	0.373118	-3.81959
ATXN7L3	0.532404	75.2739	2.13349	0.0395011	0.37383	-3.82204
RNF138	0.309561	15.9008	2.13345	0.0395038	0.37383	-3.8221
TTF2	0.342622	15.2695	2.13331	0.0395166	0.37383	-3.82236
RAPGEF1	0.410047	33.9811	2.13269	0.0395708	0.374128	-3.82345
ZNF490	0.492846	36.0438	2.13241	0.0395956	0.374128	-3.82395
CD81	0.339206	40.7894	2.13225	0.0396092	0.374128	-3.82423
FBXL8	-0.476415	37.0983	-2.13051	0.0397616	0.375374	-3.8273
XLOC_005464	-0.695662	22.8928	-2.12984	0.0398209	0.375741	-3.8285
RLBP1	-0.556706	42.8427	-2.12942	0.0398575	0.375788	-3.82923
SERPINH1	0.50455	25.9432	2.12911	0.0398848	0.375788	-3.82978
XLOC_009898	-0.269262	14.5816	-2.12894	0.0399	0.375788	-3.83008
FAM71F2	-0.567104	29.4955	-2.12885	0.0399078	0.375788	-3.83024
XLOC_l2_013594	-0.276298	23.8047	-2.12859	0.0399312	0.375816	-3.83071
ELMO1	0.493344	31.3842	2.12804	0.0399793	0.376075	-3.83167
LSM2	0.320558	44.5128	2.12781	0.0399998	0.376076	-3.83208
TMBIM6	0.258507	53.8753	2.12687	0.0400827	0.376663	-3.83374
MKI67IP	0.298722	34.3399	2.12633	0.0401309	0.376922	-3.8347
NBEAL2	-0.329147	38.7429	-2.12586	0.0401724	0.377119	-3.83552
EEA1	0.322802	14.495	2.12554	0.0402007	0.377192	-3.83609
XLOC_002106	-0.681484	50.9752	-2.12498	0.0402504	0.37746	-3.83708
LOC100130433	-0.584784	40.255	-2.12471	0.0402745	0.37746	-3.83755
GTSF1	0.596568	18.1996	2.12452	0.0402909	0.37746	-3.83788
ZNF426	0.438379	36.9762	2.12418	0.0403212	0.377551	-3.83848
XLOC_008642	-0.592527	28.4277	-2.1239	0.0403468	0.377598	-3.83899
RPGR	-0.33679	24.6072	-2.12312	0.0404163	0.378056	-3.84036
XLOC_002730	-0.35272	27.551	-2.12242	0.040478	0.37844	-3.84158
XLOC_002000	-0.499094	22.5726	-2.12184	0.0405297	0.378612	-3.8426
LOC441204	-0.310494	28.4234	-2.12176	0.0405376	0.378612	-3.84276
LOC100130148	-0.350237	28.2586	-2.12064	0.0406374	0.379351	-3.84472
TCP1	0.40426	32.9811	2.12026	0.0406713	0.379455	-3.84539
USP24	0.481525	41.5825	2.11985	0.0407087	0.379455	-3.84613
DYNC1LI1	-0.40598	25.7238	-2.11983	0.0407105	0.379455	-3.84616
SBK1	0.546701	26.9882	2.11934	0.0407542	0.379575	-3.84702
C22orf32	0.565767	36.7752	2.11922	0.0407647	0.379575	-3.84722
UPF1	0.41067	28.6714	2.1182	0.040857	0.380055	-3.84903
SMEK2	0.332341	19.3185	2.11819	0.0408576	0.380055	-3.84904
XLOC_011068	-0.416565	26.935	-2.11749	0.0409202	0.38022	-3.85027
ALKBH1	0.448576	35.3211	2.11723	0.0409442	0.38022	-3.85074
CD86	-0.687547	16.3783	-2.11704	0.0409613	0.38022	-3.85107
KLF5	0.405712	22.7629	2.11673	0.0409894	0.38022	-3.85161
LOC100507567	-0.50958	37.0207	-2.11669	0.0409931	0.38022	-3.85169
LOC100287509	-0.385517	19.1273	-2.11661	0.0409997	0.38022	-3.85182
PIGU	0.704353	48.4285	2.11615	0.0410417	0.380231	-3.85263
TM7SF2	0.546271	44.262	2.11614	0.0410422	0.380231	-3.85264
MAML3	-0.356158	30.9432	-2.1148	0.0411632	0.381159	-3.855
PFDN5	-0.409882	33.7192	-2.11391	0.0412447	0.381495	-3.85657
YLPM1	0.337933	29.0994	2.11373	0.0412604	0.381495	-3.85688
EIF4A2	0.291373	28.4656	2.11372	0.0412618	0.381495	-3.85691
XLOC_013732	-0.484627	36.0975	-2.11269	0.0413556	0.381996	-3.85872
NDUFB6	-0.389668	39.8835	-2.11248	0.0413745	0.381996	-3.85908
RPA1	0.377704	36.2767	2.11244	0.0413784	0.381996	-3.85916
LPAR5	0.651442	30.0702	2.11194	0.0414237	0.382151	-3.86003
ANKLE2	0.378508	33.8208	2.11179	0.0414368	0.382151	-3.86029
CARD11	0.332261	25.703	2.11093	0.0415153	0.382336	-3.8618
G3BP1	0.252246	18.4569	2.11077	0.04153	0.382336	-3.86208
DHX29	0.483277	39.0973	2.11014	0.0415876	0.382336	-3.86319
ELOVL1	0.54385	60.1169	2.11014	0.0415877	0.382336	-3.86319
SLC13A4	-0.445238	29.4049	-2.10961	0.0416361	0.382336	-3.86412
UBN2	0.482573	39.358	2.10895	0.0416967	0.382336	-3.86528
DLEU1	0.418692	30.6514	2.10839	0.0417478	0.382336	-3.86626
XLOC_006680	0.494594	26.5061	2.10822	0.0417641	0.382336	-3.86657
[truncated: 36,640 more rows]
