# Supplementary material
Source: Research Square preprint supplement (doi:10.21203/rs.3.rs-8976053/v1)
Supplement: Supplementary file 7 [file 5a776202f716d56d3a56709a.xlsx]

## Sheet: Database information
GEO accession codes	Group	Species	Sample Size (n)	Gender (Famle/Male)	Brain regions	Data Preprocessing	Sequencing type	Sample Source
GSE98793	Major Depressive Disorder	Human	128	96/32	/	RMA Normalized	Bulk RNA-Seq	Blood
	Healthy Control		64	48/16	/
GSE76826	Major Depressive Disorder	Human	20	11/9	/	RMA Normalized	Bulk RNA-Seq	Blood
	Healthy Control		12	7/5	/
GSE290797	Major Depressive Disorder	Human	64	64/0	/	RMA Normalized	Bulk RNA-Seq	Blood
	Healthy Control		28	28/0	/
GSE247998	Major Depressive Disorder	Human	73	44/29	/	Raw Counts	Bulk RNA-Seq	Blood
	Healthy Control		27	16/11	/
GSE99725	Major Depressive Disorder	Human	15	unknow	/	RMA Normalized	Bulk RNA-Seq	Blood
	Healthy Control		18	unknow	/
GSE185855	Major Depressive Disorder	Human	26	14/12	/	Raw Counts	Bulk RNA-Seq	Blood
	Healthy Control		21	10/11	/
GSE222756	Fluoxetine	Rat	50	/	BLA, CGC, dorDG, ILC, LConly, mPOA, NACShell, PLC, Raphe, venDG	Raw Counts	Bulk RNA-Seq	Brain
	Bupropion		50
	Desipramine		50
	Probiotics		50
	Maltodextrin		50
	Control		64
GSE194289	Fluoxetine	Rat	106	/	PLC, ILC, CGC, InsularCortex, NaCshell, NaCcore, LS, MS, BNST, mPOA, PVN, MDT, LH, VMH, BLA, CMA, dorDG, dorCA1, HB, venDG, venCA1, VTA, PAG, Raphe, LC, SNT, ARC	Raw Counts	Bulk RNA-Seq	Brain
	Control		106
GSE144136	Major Depressive Disorder	Human	12	0/12	dlPFC, MPFC	Raw Counts	scRNA-seq	Brain
	Healthy		7	0/7
GSE201687	Major Depressive Disorder	Macaque	17	17/0	dlPFC	Raw Counts	scRNA-seq	Brain
	Healthy		17	17/0
