# Supplementary material
Source: Research Square preprint supplement (doi:10.21203/rs.3.rs-8976053/v1)
Supplement: Supplementary file 8 [file 6444fbbdc5f6b65d7b2d631d.xlsx]

## Sheet: Sheet1
gene	logFC	AveExpr	t	P.Value	adj.P.Val	B
B3GALT4	883.902	3938.64	7.21944	4.43588e-08	0.00142299	6.57237
RNPEPL1	6374.38	32334.1	6.80846	1.36491e-07	0.00218925	5.79101
TOR1A	292.91	1194.36	6.61239	2.34736e-07	0.00251003	5.4084
DGKA	-278.684	657.361	-6.46667	3.52036e-07	0.00282324	5.12009
NACC1	240.967	1048.9	6.35551	4.80139e-07	0.00308047	4.89799
COPS7B	-17.4312	45.126	-6.08793	1.01745e-06	0.00501725	4.35596
GPANK1	933.286	4415.23	6.06191	1.09482e-06	0.00501725	4.30272
C6orf1	2584.88	9909.9	5.96217	1.45058e-06	0.00581663	4.09779
DYM	337.437	1480.26	5.90055	1.72644e-06	0.00615359	3.97055
UBLCP1	694.412	2921.9	5.82087	2.16304e-06	0.00643295	3.80531
GNB1	1010.77	5660.47	5.81394	2.20588e-06	0.00643295	3.79091
NIPA2	765.193	2625.39	5.76969	2.50053e-06	0.00668453	3.69876
DYTN	276.368	1347.84	5.72519	2.83673e-06	0.00699997	3.60588
PSMD4	2820.51	9194.77	5.67961	3.22827e-06	0.00739711	3.51051
XLOC_002996	-68.4172	125.789	-5.61857	3.83913e-06	0.00821037	3.38242
C14orf2	472.437	2030.64	5.50438	5.3109e-06	0.00955405	3.14176
LAMP1	4993.34	24973.7	5.49525	5.4505e-06	0.00955405	3.12247
ACTR2	1051.37	4513.14	5.47092	5.84099e-06	0.00955405	3.07101
LOC283693	-19.8381	42.9725	-5.46472	5.94491e-06	0.00955405	3.05789
XLOC_000390	-241.037	498.248	-5.4464	6.26298e-06	0.00955405	3.01908
MRPS36	487.937	2680.41	5.43421	6.48408e-06	0.00955405	2.99324
FOXN2	671.143	3444.87	5.42235	6.70659e-06	0.00955405	2.96809
STARD5	-40.8316	106.039	-5.41491	6.85006e-06	0.00955405	2.95231
TRIP12	297.592	1787.33	5.39766	7.19464e-06	0.00961654	2.91571
GSK3A	1061.2	7798.02	5.35123	8.21108e-06	0.0105361	2.81703
BNIP2	941.022	3951.84	5.33528	8.59265e-06	0.0106017	2.78308
C2orf76	66.9025	309.5	5.29454	9.64933e-06	0.0107043	2.69629
LOC100507153	-245.277	560.64	-5.29006	9.77331e-06	0.0107043	2.68673
CNKSR1	-28.2572	54.4952	-5.28922	9.79671e-06	0.0107043	2.68494
HAPLN2	1651.38	6515.71	5.27752	1.01286e-05	0.0107043	2.65998
RBM18	215.498	1065.01	5.27012	1.03442e-05	0.0107043	2.6442
RNF222	163.655	663.806	5.23362	1.14773e-05	0.0109143	2.56626
NDUFB1	2002.99	9898.17	5.2045	1.24695e-05	0.0109143	2.50401
CEP68	-48.6826	130.719	-5.20325	1.25139e-05	0.0109143	2.50134
PAPOLA	188.901	799.5	5.19858	1.26812e-05	0.0109143	2.49136
PCSK7	-180.119	500.693	-5.18646	1.31267e-05	0.0109143	2.46542
XLOC_000721	-13.7325	31.8949	-5.1756	1.3539e-05	0.0109143	2.44217
XLOC_008338	-18.2068	31.7999	-5.17131	1.37056e-05	0.0109143	2.43298
UBE2A	296.969	2106.21	5.16894	1.37982e-05	0.0109143	2.42792
SPDYE8P	-8.2904	10.509	-5.15857	1.42118e-05	0.0109143	2.4057
WAC	959.139	5220.88	5.1517	1.44927e-05	0.0109143	2.39098
PSMB4	3051.83	14437.2	5.14487	1.47771e-05	0.0109143	2.37635
NAIF1	164.198	946.876	5.14245	1.48794e-05	0.0109143	2.37117
STAG3L2	-106.857	293.608	-5.13978	1.49929e-05	0.0109143	2.36544
TAF12	839.115	4172.19	5.13242	1.53104e-05	0.0109143	2.34967
TCEB1	1457.67	7732.33	5.11962	1.58787e-05	0.0110733	2.32223
ELF4	1786.95	7272.44	5.07413	1.80745e-05	0.0123105	2.2246
LOC100507333	-17.6326	35.8445	-5.05313	1.91877e-05	0.0123105	2.1795
KLF13	2867.35	19362.9	5.04736	1.95054e-05	0.0123105	2.1671
HERPUD1	2360.64	13945.6	5.03496	2.02065e-05	0.0123105	2.14044
CTDSP1	2748.6	17463.3	5.02903	2.05502e-05	0.0123105	2.1277
FLJ12334	-15.0252	42.0518	-5.02884	2.05616e-05	0.0123105	2.12728
ACTR3	2166.67	12296.4	5.01697	2.12678e-05	0.0123105	2.10177
C15orf24	674.253	4072.19	5.00893	2.176e-05	0.0123105	2.08448
XLOC_010377	-169.26	378.461	-5.0068	2.18921e-05	0.0123105	2.07991
RLF	288.96	1476.7	5.00571	2.19602e-05	0.0123105	2.07756
ZMAT2	938.374	4348.65	5.00195	2.21969e-05	0.0123105	2.06945
SRCAP	-34.6288	102.483	-4.99619	2.25637e-05	0.0123105	2.05706
CTBP2	1249.76	3848.58	4.99498	2.26416e-05	0.0123105	2.05446
CALM2	2859.68	13985.5	4.95934	2.50577e-05	0.0132056	1.97775
LPGAT1	1437.72	4666.61	4.9566	2.52535e-05	0.0132056	1.97185
XLOC_l2_001953	-25.8302	38.7386	-4.95168	2.56096e-05	0.0132056	1.96125
EIF1	21950.8	140589	4.94117	2.6387e-05	0.0132056	1.93861
CAPS	-90.2617	280.73	-4.94047	2.64391e-05	0.0132056	1.93711
RGS19	7936.97	25961.5	4.93626	2.67578e-05	0.0132056	1.92804
DNHD1	-24.3851	67.4598	-4.9307	2.71843e-05	0.0132128	1.91606
COX6A1	5414.9	29293.7	4.9045	2.92867e-05	0.0139189	1.8596
MARK3	1016.66	4421.71	4.90189	2.95047e-05	0.0139189	1.85398
C20orf24	5153.27	16051	4.89301	3.02596e-05	0.0139488	1.83482
FASTKD5	311.227	1701.17	4.89094	3.04379e-05	0.0139488	1.83036
COPB2	637.671	4558.75	4.88123	3.12901e-05	0.0141374	1.80941
CDK7	133.22	933.618	4.87322	3.20105e-05	0.0142595	1.79214
NACC2	532.938	1291.44	4.86469	3.27958e-05	0.0142595	1.77375
MIIP	1504.52	6904.63	4.85708	3.35127e-05	0.0142595	1.75733
LAMTOR2	902.395	4651.11	4.85355	3.3851e-05	0.0142595	1.7497
TXNL1	360.796	2342.17	4.84802	3.43871e-05	0.0142595	1.73777
GOLGA2P5	-40.6902	147.858	-4.84726	3.44619e-05	0.0142595	1.73612
ZDHHC3	251.031	1250.49	4.84078	3.51017e-05	0.0142595	1.72215
ARPC2	5306.58	26162	4.83565	3.56171e-05	0.0142595	1.71108
OSTF1	2588.61	8610.83	4.83502	3.56812e-05	0.0142595	1.70971
LUZP6	993.696	3860.82	4.83035	3.61574e-05	0.0142595	1.69964
MBD2	806.31	4489.54	4.82584	3.66236e-05	0.0142595	1.6899
DUSP23	802.578	3885.67	4.81958	3.72802e-05	0.0142595	1.6764
PPP6C	260.318	1722.74	4.81423	3.78517e-05	0.0142595	1.66483
DR1	219.117	1284.13	4.80679	3.86597e-05	0.0142595	1.64878
YY1	815.098	4114.77	4.80627	3.87173e-05	0.0142595	1.64764
ARPC3	9505.4	44858.7	4.80622	3.87228e-05	0.0142595	1.64754
LOC646938	-25.2397	60.1767	-4.80265	3.9117e-05	0.0142595	1.63984
ISYNA1	-60.4294	186.718	-4.79842	3.95893e-05	0.0142695	1.63071
FBRS	1425.39	8534.75	4.79365	4.01291e-05	0.0143033	1.62041
TNFSF12	524.646	2640.04	4.78873	4.06943e-05	0.0143454	1.60977
C10orf95	-18.5273	44.8829	-4.77144	4.27413e-05	0.0149032	1.57243
FAM22G	-50.4329	121.449	-4.76458	4.35817e-05	0.0149501	1.55761
ATP6V1D	225.589	741.994	4.75054	4.53529e-05	0.0149501	1.52728
LSR	-40.2813	79.2903	-4.74897	4.55557e-05	0.0149501	1.52388
CD63	5402.43	21745.7	4.74675	4.58431e-05	0.0149501	1.51909
YWHAB	2388.42	15523.9	4.74634	4.58963e-05	0.0149501	1.51821
CDC42	1255.22	6417.14	4.74187	4.64828e-05	0.0149501	1.50854
HYOU1	-26.7642	79.5542	-4.73826	4.696e-05	0.0149501	1.50075
CBX3	641.522	3524.89	4.73643	4.72046e-05	0.0149501	1.4968
MARCKSL1	-174.426	567.278	-4.73424	4.74989e-05	0.0149501	1.49206
MYL12A	6557.95	39588.8	4.73397	4.75361e-05	0.0149501	1.49146
PIK3C3	271.097	1394.93	4.71712	4.98628e-05	0.0153854	1.45505
FLI1	936.737	5585.09	4.717	4.98795e-05	0.0153854	1.4548
SLC7A6	-26.5111	63.5971	-4.71002	5.08764e-05	0.0154079	1.43971
SCYL2	129.8	795.687	4.70977	5.0913e-05	0.0154079	1.43916
SLC34A1	-17.9776	27.9783	-4.70178	5.20791e-05	0.0156135	1.4219
HIAT1	348.125	1914.85	4.68962	5.39045e-05	0.0158005	1.39563
SPTAN1	-270.253	805.414	-4.68887	5.40203e-05	0.0158005	1.39399
TADA3	1915.27	11410.1	4.68782	5.41806e-05	0.0158005	1.39173
CYB5R3	1638.03	10256.7	4.68248	5.50069e-05	0.015897	1.38018
SNORA70	-230.048	811.404	-4.67774	5.57512e-05	0.0159682	1.36993
PCMT1	181.771	943.151	4.67369	5.63945e-05	0.0160095	1.36118
CRADD	166.144	837.634	4.66759	5.73767e-05	0.0160544	1.348
CD27	-979.706	2366.03	-4.66607	5.76252e-05	0.0160544	1.3447
SEC13	323.585	2050.26	4.66345	5.80538e-05	0.0160544	1.33905
XLOC_l2_002790	-16.7164	32.9824	-4.65394	5.96398e-05	0.0162807	1.31847
MCTP1	131.407	342.331	4.65248	5.98873e-05	0.0162807	1.31531
ERAL1	-50.6322	162.4	-4.64648	6.09125e-05	0.0163586	1.30235
ORMDL2	745.189	5706.11	4.64486	6.11937e-05	0.0163586	1.29883
BRK1	1078.1	7810.59	4.63479	6.29623e-05	0.0166923	1.27707
XLOC_005279	-20.2266	48.0377	-4.62481	6.47667e-05	0.0169332	1.25549
OLFM2	-12.892	33.4031	-4.62394	6.49266e-05	0.0169332	1.2536
CDV3	610.02	4144.67	4.62039	6.55826e-05	0.0169663	1.24592
GTDC1	81.8632	366.057	4.61376	6.68242e-05	0.0171285	1.23159
XLOC_008371	-28.2064	60.9119	-4.61137	6.72775e-05	0.0171285	1.22642
C1orf200	73.1708	255.749	4.60841	6.78442e-05	0.0171368	1.22001
CCM2	220.05	1015.06	4.60324	6.8843e-05	0.0172532	1.20884
PAFAH1B1	317.67	2255.86	4.59846	6.97806e-05	0.0173526	1.1985
XLOC_003405	-52.9577	118.118	-4.59327	7.08121e-05	0.0173863	1.18728
RLN1	-9.8199	15.2919	-4.59234	7.09997e-05	0.0173863	1.18526
POLR2F	207.021	1466.57	4.57738	7.40663e-05	0.0179998	1.15292
ANAPC11	3655.57	20206.7	4.57175	7.52556e-05	0.0181513	1.14074
LOC100130093	-23.766	61.5282	-4.56609	7.6469e-05	0.0182916	1.1285
UFD1L	691.084	5362.82	4.56374	7.69778e-05	0.0182916	1.12343
PDE7A	-64.3313	200.592	-4.55683	7.8497e-05	0.0183218	1.10847
KCTD12	2493.96	7877.16	4.55633	7.8608e-05	0.0183218	1.10739
DIAPH1	1638.32	11477	4.55139	7.97127e-05	0.0183218	1.09671
VEZF1	175.785	1261.8	4.55034	7.99493e-05	0.0183218	1.09444
SEPT7	175.233	1287.65	4.54982	8.00676e-05	0.0183218	1.09331
GMPR2	869.159	3989.86	4.54716	8.06703e-05	0.0183218	1.08757
TP53	-27.4549	75.2526	-4.54527	8.11028e-05	0.0183218	1.08348
NDUFA1	2739.15	15386.5	4.53776	8.28423e-05	0.0185839	1.06723
ANKK1	-13.6231	22.2478	-4.53015	8.46423e-05	0.0188558	1.05077
SNORA70E	-165.821	521.839	-4.52626	8.55751e-05	0.0189322	1.04238
PLEC	-164.556	657.602	-4.52178	8.66657e-05	0.0189927	1.03268
PSMB10	8385.66	45063.7	4.51804	8.75842e-05	0.0189927	1.0246
MTA3	-11.7997	38.6324	-4.51788	8.76249e-05	0.0189927	1.02425
MPST	344.771	1985.47	4.51468	8.84208e-05	0.0190366	1.01732
CD3E	-334.268	713.006	-4.50803	9.00956e-05	0.0192678	1.00295
U2AF1	1627.86	12228.7	4.50265	9.14741e-05	0.0194331	0.991311
XLOC_l2_012162	-4.89261	18.0998	-4.48976	9.48615e-05	0.0195522	0.963445
MMP24	-2.48209	4.43553	-4.48891	9.50888e-05	0.0195522	0.96161
UQCR11	5212.74	34833.2	4.48862	9.51682e-05	0.0195522	0.960971
TIMM8B	1299.77	7525.97	4.48781	9.53859e-05	0.0195522	0.95922
H2AFV	1292.06	7312.72	4.48722	9.55431e-05	0.0195522	0.957957
MINK1	-38.4773	108.612	-4.4861	9.58457e-05	0.0195522	0.955533
MAPRE1	265.916	1627.85	4.48442	9.63015e-05	0.0195522	0.951897
SNORA70B	-53.5035	166.973	-4.46936	0.000100479	0.0201551	0.919337
RBMS1	1215.11	6559.65	4.46904	0.000100568	0.0201551	0.91866
CAPZA1	1370.16	7215.39	4.46631	0.000101348	0.0201551	0.912739
CCNH	174.788	1189.97	4.46478	0.000101784	0.0201551	0.909443
NDUFB4	1554.66	9771.34	4.45265	0.000105323	0.0206323	0.883227
RAD21	1123.11	6438.2	4.45075	0.000105891	0.0206323	0.879103
CHUK	528.171	2460.94	4.4484	0.000106594	0.0206323	0.874026
USMG5	3010.14	17985.6	4.44782	0.000106767	0.0206323	0.872783
IGSF9B	-61.8319	214.143	-4.44424	0.00010785	0.0207169	0.865037
EIF3A	1015.7	6085.59	4.44115	0.000108791	0.0207351	0.85837
URB1	-22.4393	52.4357	-4.4397	0.000109237	0.0207351	0.855231
AGPAT2	2113.09	8891.29	4.43754	0.000109906	0.0207392	0.85055
CHP	2859.25	10678.3	4.42757	0.000113033	0.0208209	0.829015
SAFB2	-135.966	771.428	-4.42538	0.000113732	0.0208209	0.824289
RNF139	252.208	1463.08	4.42414	0.000114131	0.0208209	0.821596
NFKBID	-52.2872	217.893	-4.42318	0.000114439	0.0208209	0.819532
MIER1	329.06	1862.04	4.42188	0.00011486	0.0208209	0.816712
ARHGAP1	1856.13	13563.3	4.42163	0.000114941	0.0208209	0.816168
C22orf32	-13.19	33.3129	-4.42108	0.000115119	0.0208209	0.814982
ZNF507	-15.1817	39.4523	-4.41797	0.000116131	0.0208209	0.808265
C6orf89	277.074	1400.7	4.41782	0.00011618	0.0208209	0.807937
C17orf28	-30.694	74.9203	-4.40257	0.000121272	0.0216127	0.775001
CUL3	674.038	3392.86	4.40025	0.000122068	0.0216343	0.76998
MRPS18C	437.697	1987.61	4.39728	0.000123092	0.0216407	0.763562
LMO7	-8.19956	16.2081	-4.39624	0.000123453	0.0216407	0.761313
HOMER3	1759.65	4766.57	4.39204	0.000124918	0.0217785	0.75225
RTN4	4479.49	22034.1	4.38059	0.000129008	0.0220158	0.727502
FBXO44	-41.0689	127.102	-4.37998	0.000129229	0.0220158	0.726188
ANKRD10-IT1	-36.1264	108.923	-4.3796	0.000129365	0.0220158	0.725378
XLOC_l2_009285	-43.5047	110.056	-4.37958	0.000129375	0.0220158	0.725323
CSDE1	429.263	2645.57	4.37736	0.000130182	0.0220158	0.720544
SURF1	1591.63	10908.1	4.37559	0.000130832	0.0220158	0.716713
XLOC_l2_002651	84.6293	485.877	4.37491	0.000131083	0.0220158	0.715242
LOC730202	-13.9536	28.6688	-4.37131	0.000132417	0.022067	0.707463
NAA60	488.123	3715.45	4.36823	0.000133568	0.022067	0.700809
PPP4R2	60.6989	349.352	4.36712	0.000133984	0.022067	0.69842
PIGS	725.695	3704.41	4.36671	0.00013414	0.022067	0.697529
C5orf62	529.573	1614.68	4.3648	0.00013486	0.0220723	0.693413
AAAS	-118.826	474.007	-4.36236	0.000135787	0.0220895	0.688148
XLOC_005365	18.9751	93.7659	4.36091	0.000136342	0.0220895	0.685013
SAMD1	-47.0467	164.605	-4.35587	0.000138286	0.0222919	0.67413
SZT2	-19.7794	66.8309	-4.35394	0.00013904	0.0223013	0.669952
USP39	565.706	4101.43	4.35174	0.000139902	0.0223279	0.665202
JAZF1	160.899	740.539	4.34419	0.000142899	0.022533	0.648906
FAIM3	-499.013	1141.81	-4.34374	0.00014308	0.022533	0.647929
ARID1A	-168.185	602.124	-4.34188	0.000143828	0.022533	0.643922
KLF3	1013.61	5154.87	4.34045	0.000144405	0.022533	0.640841
LOC100506906	487.197	2843.44	4.33973	0.000144699	0.022533	0.63928
THEM4	-71.0985	172.209	-4.32546	0.000150611	0.0232009	0.608481
CBX5	-76.0223	380.903	-4.32463	0.000150963	0.0232009	0.606687
PLSCR3	-98.646	335.003	-4.32417	0.000151158	0.0232009	0.605695
PRDX6	559.021	3763.78	4.31895	0.000153388	0.0232285	0.594432
MMADHC	655.065	4262.69	4.31712	0.000154178	0.0232285	0.590475
NDUFA2	1116.47	7674.21	4.31623	0.000154562	0.0232285	0.588563
XLOC_000152	-95.2545	248.993	-4.31503	0.000155083	0.0232285	0.585976
SERTAD1	812.383	4052.34	4.31499	0.000155099	0.0232285	0.585893
LTBP3	-53.7297	137.257	-4.31366	0.000155682	0.0232285	0.583008
SH3GLB2	-58.7944	219.524	-4.31104	0.000156828	0.0232912	0.577366
COPB1	506.695	2773.44	4.30854	0.000157934	0.0233473	0.571961
GNRHR2	-27.8775	77.8675	-4.30442	0.000159765	0.023435	0.56309
GNAI2	25394.1	151284	4.30393	0.000159989	0.023435	0.562014
WDR60	-17.4889	59.3817	-4.29493	0.000164075	0.0237958	0.542606
PTPN12	1330.24	6347.27	4.29474	0.000164162	0.0237958	0.5422
PPP1R15B	698.474	3690.09	4.2932	0.000164872	0.0237958	0.538877
KDM4A	79.0931	460.169	4.28952	0.000166579	0.0237958	0.530947
HDAC3	375.919	2611.8	4.28728	0.000167628	0.0237958	0.526116
XLOC_l2_008013	298.095	1117.53	4.28712	0.000167706	0.0237958	0.525759
KIF5B	237.058	1448.75	4.28669	0.000167904	0.0237958	0.524848
EIF4EBP2	1000.74	6007.87	4.28567	0.000168385	0.0237958	0.522646
SMNDC1	274.062	1505.69	4.28172	0.000170261	0.0239553	0.514119
ATPIF1	1369.06	10240.1	4.27928	0.00017143	0.0240004	0.508851
COX7A2	2726.8	18511.3	4.27793	0.000172078	0.0240004	0.505947
CCDC64	-10.2031	15.3764	-4.27548	0.000173262	0.024028	0.500669
GIT2	377.198	2043.36	4.2718	0.000175059	0.024028	0.492722
RLTPR	-388.999	1366.09	-4.27152	0.000175194	0.024028	0.492132
POP7	823.604	4277.56	4.27136	0.000175272	0.024028	0.491789
APC	51.3007	282.497	4.26554	0.000178152	0.0242503	0.479237
TMEM30A	678.663	2873.9	4.26503	0.000178406	0.0242503	0.478143
RNF181	800.018	5758.51	4.25719	0.000182367	0.024585	0.461231
XLOC_006138	-7.35613	15.5415	-4.25697	0.000182479	0.024585	0.460758
KPNB1	2603.46	11627.8	4.25562	0.000183167	0.024585	0.457861
ZNF350	313.209	1347.16	4.25232	0.000184868	0.0246538	0.450741
XLOC_010376	-8.52476	34.2348	-4.251	0.000185553	0.0246538	0.447893
GAA	5038.91	17843.2	4.25015	0.000185994	0.0246538	0.446061
C19orf55	-27.9783	118.623	-4.24869	0.000186754	0.0246538	0.442923
WIPI1	777.709	2444.18	4.24128	0.000190666	0.0250671	0.426951
SYNC	-54.1019	151.958	-4.2363	0.000193341	0.0252675	0.416219
SNORD4A	-37.3759	109.392	-4.23407	0.000194551	0.0252675	0.411412
TBC1D2	1346.72	4223.33	4.23406	0.000194554	0.0252675	0.411401
NAPG	140.412	1018.46	4.23006	0.000196742	0.0253078	0.402781
IER2	9718.45	52083.8	4.22783	0.000197973	0.0253078	0.397975
SH3GL1P1	-109.546	468.179	-4.22772	0.000198032	0.0253078	0.397747
PTRH2	474.99	2448.8	4.22582	0.00019909	0.0253078	0.393642
FAM199X	110.35	639.481	4.22499	0.000199552	0.0253078	0.391856
ANO10	351.562	1231.41	4.22491	0.000199597	0.0253078	0.391681
C17orf65	-53.1616	252.711	-4.22136	0.000201586	0.0254594	0.384039
TMEM11	417.031	2510.46	4.21832	0.000203305	0.0255758	0.377495
GPBP1	567.896	3743.68	4.21368	0.000205958	0.0258083	0.367503
MAP3K3	3617.87	13502.5	4.20916	0.000208576	0.0260039	0.357766
MPP7	38.4484	124.998	4.20819	0.00020914	0.0260039	0.355684
NDUFB3	2360.16	9851.42	4.20491	0.000211067	0.0261422	0.348614
BMS1P1	-40.5964	109.727	-4.20188	0.000212861	0.0262026	0.342091
LOC375190	90.3697	373.11	4.20132	0.000213189	0.0262026	0.340904
FAM120AOS	158.231	888.371	4.19055	0.0002197	0.0267705	0.317707
BROX	53.3253	254.665	4.18998	0.000220046	0.0267705	0.316495
KRTAP10-9	-41.3269	103.007	-4.18933	0.000220449	0.0267705	0.315085
TMBIM6	4250.36	24021.9	4.18819	0.000221148	0.0267705	0.312645
ROCK1	187.914	1177.75	4.18457	0.000223393	0.0268612	0.304855
FLJ44124	-8.99121	18.0723	-4.18328	0.0002242	0.0268612	0.302075
UBE2K	813.282	5920.94	4.18295	0.000224409	0.0268612	0.301357
TNRC6A	-152.589	580.327	-4.17534	0.000229221	0.0272011	0.284994
PRCP	5205.32	20843.2	4.17348	0.000230414	0.0272011	0.280991
COX4NB	308.207	1451.08	4.17253	0.000231023	0.0272011	0.278953
PRR13	8360.9	35393.5	4.17072	0.000232195	0.0272011	0.275052
TAOK3	128.821	899.533	4.16964	0.000232894	0.0272011	0.272731
DOCK9	-19.468	63.1328	-4.16916	0.000233207	0.0272011	0.271696
VTI1A	55.8614	347.108	4.16822	0.000233818	0.0272011	0.269679
MYCBP	362.055	1715.95	4.16551	0.000235593	0.0272011	0.263844
RAE1	1388.56	6338.16	4.16358	0.000236862	0.0272011	0.259701
THAP1	165.965	1044.17	4.16311	0.00023717	0.0272011	0.258696
ATN1	-64.2193	163.068	-4.16172	0.000238093	0.0272011	0.2557
YTHDF3	445.531	2637.35	4.16164	0.000238146	0.0272011	0.255529
KIF1C	632.332	3845.7	4.16145	0.000238271	0.0272011	0.255123
LOC96610	-305.086	362.221	-4.1506	0.000245586	0.0277919	0.231795
CRIP2	-115.1	221.022	-4.14889	0.000246757	0.0277919	0.228124
LOC100507501	-13.5399	38.0951	-4.14813	0.000247284	0.0277919	0.226478
MOB1A	113.036	972.957	4.14714	0.000247965	0.0277919	0.224355
OVGP1	-37.7351	77.165	-4.14713	0.000247969	0.0277919	0.224343
LOC100128857	-22.8599	35.3624	-4.14553	0.000249079	0.0277919	0.220897
PPP1R12C	1804.59	13008.8	4.14491	0.000249511	0.0277919	0.219561
PXN	2297.67	12160.9	4.14316	0.000250728	0.0278309	0.215805
CASP3	351.482	2117.48	4.1399	0.000253018	0.0279106	0.20879
GSTM2	-78.0646	126.534	-4.13894	0.000253693	0.0279106	0.206735
CCZ1	148.01	1042	4.13842	0.000254057	0.0279106	0.205627
SH2D3C	2371.77	11217.8	4.13607	0.000255726	0.0279981	0.200573
POLR2E	481.569	3031.75	4.13351	0.000257556	0.0281026	0.195069
RP2	1065.76	3991.15	4.13143	0.000259052	0.02817	0.190599
COL4A3BP	485.317	2474.84	4.12162	0.000266224	0.028852	0.169521
EPAS1	112.103	229.611	4.11656	0.000269998	0.0289393	0.158655
UBE2D3	894.23	4610.19	4.11607	0.000270367	0.0289393	0.1576
FAM49B	2006.44	8396.21	4.11572	0.000270628	0.0289393	0.156855
LOC100287509	577.125	3892.87	4.11571	0.000270638	0.0289393	0.156827
SERP1	218.657	1272.4	4.11294	0.000272725	0.0290656	0.150896
HKR1	-23.9873	71.1445	-4.10903	0.000275708	0.0291775	0.142497
DDAH2	388.716	1681.41	4.10857	0.000276059	0.0291775	0.141514
TTC1	166.213	1028.17	4.10799	0.000276503	0.0291775	0.140273
PGGT1B	15.2621	95.1648	4.10197	0.00028117	0.0295286	0.12735
COX7B	955.582	6388.15	4.10034	0.000282449	0.0295286	0.123846
PCSK5	99.1396	292.291	4.09899	0.000283513	0.0295286	0.120942
LOC100129917	-45.5822	140.098	-4.09853	0.000283878	0.0295286	0.119949
IGSF8	-37.82	138.853	-4.09782	0.000284433	0.0295286	0.11844
UQCR10	874.517	5338.24	4.09391	0.000287545	0.0297554	0.110037
PHF2	195.962	1472.49	4.09016	0.000290552	0.0299076	0.102004
LOC391322	-62.4759	41.1045	-4.08845	0.000291933	0.0299076	0.0983407
CRTC2	901.072	5462.02	4.08766	0.00029258	0.0299076	0.0966304
SPECC1	138.915	506.52	4.08667	0.000293384	0.0299076	0.0945127
SIT1	-321.824	839.625	-4.08602	0.000293916	0.0299076	0.0931123
SLU7	412.533	2605.37	4.08517	0.000294611	0.0299076	0.0912895
RBM14-RBM4	862.956	6627.61	4.08288	0.000296484	0.0299213	0.0863939
PLEKHA3	74.3975	432.966	4.08213	0.000297105	0.0299213	0.0847767
MGST2	500.288	1307.77	4.0816	0.000297544	0.0299213	0.0836373
AP1G2	-200.3	966.215	-4.0774	0.000301032	0.0300574	0.074635
ZNF500	-166.592	506.159	-4.07673	0.00030159	0.0300574	0.0732032
TCF7	-618.383	1482.76	-4.07659	0.00030171	0.0300574	0.072896
PDXDC2P	-94.205	278.408	-4.07548	0.000302645	0.0300574	0.0705064
PSMC1	544.735	3738.15	4.07205	0.000305533	0.0302506	0.0631694
KCTD21	109.001	451.747	4.06873	0.000308362	0.0303321	0.056051
XLOC_002186	-19.379	71.4381	-4.06866	0.000308421	0.0303321	0.0559008
LOC728875	2211.6	13717.9	4.06776	0.000309193	0.0303321	0.0539714
Q6IHG2	-98.4009	221.992	-4.06633	0.000310428	0.0303604	0.0508906
EXD2	-5.86954	8.23566	-4.06249	0.000313752	0.0305922	0.042663
MCMBP	406.541	1755.22	4.05952	0.000316348	0.0306688	0.0362963
FLJ38379	-9.35097	11.1232	-4.0594	0.000316449	0.0306688	0.0360489
DGCR2	1143.65	6854.67	4.05702	0.000318548	0.0306939	0.0309405
EPN1	1503.34	9106.23	4.05693	0.000318622	0.0306939	0.0307617
HNRNPC	866.66	5153.2	4.05405	0.000321183	0.030848	0.0245744
ZC3H12D	-7.77015	24.9408	-4.04874	0.000325943	0.0309718	0.0132062
SNORA70C	-97.027	326.114	-4.04696	0.000327559	0.0309718	0.00938539
DOK1	1393.19	7416.82	4.04693	0.000327583	0.0309718	0.00932849
UQCRQ	3017.41	18137.1	4.04668	0.000327814	0.0309718	0.00878508
ROM1	42.8684	202.328	4.0456	0.000328792	0.0309718	0.00648148
FBXL5	3515.05	12124.8	4.04557	0.000328817	0.0309718	0.00642351
MYL12B	3710.32	28390.8	4.04461	0.000329693	0.0309718	0.00436633
SAMD10	-109.135	334.207	-4.04406	0.000330196	0.0309718	0.00318977
TGOLN2	973.06	5804.19	4.03971	0.000334208	0.0311669	-0.00614386
SMYD5	-52.5335	174.077	-4.03969	0.000334219	0.0311669	-0.00617117
PLDN	427.262	2769.24	4.03837	0.000335451	0.0311911	-0.00901364
EIF4H	1033.02	8521.08	4.03598	0.000337679	0.0313075	-0.0141299
SHARPIN	406.233	2959.59	4.03235	0.000341083	0.0314576	-0.0218839
INPP5D	2528.23	15537.8	4.03113	0.000342246	0.0314576	-0.0245141
MTMR14	1021.45	6144.68	4.02947	0.00034382	0.0314576	-0.028061
LOC100507209	-21.6949	35.6398	-4.0286	0.000344644	0.0314576	-0.0299121
VCPIP1	156.288	1013.75	4.02674	0.000346424	0.0314576	-0.0338938
EPC2	201.264	1374.7	4.02617	0.000346977	0.0314576	-0.0351263
PNPLA8	244.784	1591.26	4.02531	0.000347801	0.0314576	-0.0369593
ABCA11P	-10.018	23.0276	-4.02529	0.000347825	0.0314576	-0.0370135
XLOC_011507	-20.3343	46.5798	-4.02498	0.000348124	0.0314576	-0.0376763
LOC100506282	-11.5424	27.2037	-4.02191	0.000351087	0.0316363	-0.0442294
SNX13	153.321	718.12	4.02002	0.000352935	0.0316933	-0.0482871
LCAT	-32.014	171.922	-4.01924	0.000353696	0.0316933	-0.0499516
LOC100130463	-26.5283	48.9448	-4.01322	0.000359641	0.0320247	-0.062839
PRKAR1B	-42.6406	69.5868	-4.01311	0.000359749	0.0320247	-0.0630719
LOC100505530	-10.0168	17.5331	-4.01247	0.000360389	0.0320247	-0.0644453
USP33	456.258	3770.76	4.01034	0.000362512	0.0321244	-0.0689876
YTHDC1	-34.5564	89.8239	-4.00872	0.000364146	0.0321803	-0.0724647
SH3GLB1	976	3417.1	4.00732	0.00036556	0.0322165	-0.0754599
NEB	-7.21201	11.1613	-4.00607	0.000366821	0.0322391	-0.078124
VAV3	572.573	2703.86	4.00316	0.000369786	0.0323885	-0.0843488
SNORA80	-20.5059	102.456	-4.00159	0.000371394	0.0323885	-0.087704
IQCE	186.499	609.26	4.00139	0.000371601	0.0323885	-0.0881351
EXOC6	371.656	1408.52	4.00046	0.00037256	0.0323885	-0.0901265
IGLL5	-12386.1	16333	-3.99713	0.000375999	0.0325979	-0.097232
SNORA70G	-91.9956	319.546	-3.99617	0.000377002	0.0325979	-0.0992918
XLOC_005278	-29.4676	61.3394	-3.9922	0.000381162	0.0328691	-0.107779
PPP1R3E	-48.6169	164.667	-3.98944	0.000384074	0.0330314	-0.113665
STXBP3	751.759	3559.35	3.98775	0.000385875	0.0330976	-0.117283
TRIM33	123.221	818.089	3.98528	0.000388522	0.033173	-0.12257
PDGFB	-23.8993	44.8869	-3.98467	0.000389177	0.033173	-0.123872
LOC100506985	-107.338	259.555	-3.98372	0.000390195	0.033173	-0.125893
SAP30	209.448	833.509	3.98217	0.000391871	0.033173	-0.129208
ARHGAP26	271.391	1089.36	3.98212	0.000391925	0.033173	-0.129314
SGMS1	132.003	619.56	3.98036	0.000393835	0.0332469	-0.133076
EDEM1	-31.1444	206.476	-3.97894	0.000395384	0.0332901	-0.136112
ITGB2	4743.11	15922.4	3.97755	0.000396898	0.0333235	-0.139068
LOC650368	-446.85	1033.41	-3.97608	0.000398513	0.0333235	-0.142208
GLA	617.855	2849.33	3.97574	0.000398897	0.0333235	-0.142954
PSMD13	284.426	1427.3	3.97277	0.000402177	0.0335102	-0.149288
LOC100128563	-54.4043	157.95	-3.96967	0.000405637	0.0335821	-0.155914
LOC100133991	-9.08745	20.0797	-3.96903	0.000406353	0.0335821	-0.15728
EVI2A	1504.72	5499.19	3.96792	0.000407594	0.0335821	-0.159638
LOC142937	-124.236	406.035	-3.96782	0.000407715	0.0335821	-0.159867
TRRAP	-96.5385	308.781	-3.96732	0.000408273	0.0335821	-0.160926
PGM2	501.824	1508.84	3.96625	0.000409481	0.0335897	-0.163212
TOR1AIP2	17.0704	117.386	3.96538	0.00041046	0.0335897	-0.165059
KCNQ1	395.459	1536.66	3.9604	0.000416143	0.0339681	-0.175696
SAP130	196.556	1539.32	3.9586	0.000418214	0.0340505	-0.179537
KIFC2	-45.2117	166.85	-3.95692	0.000420157	0.034122	-0.183123
Q982T4	-290.49	926.513	-3.95325	0.000424431	0.0343698	-0.190953
SNORA51	-8.75238	30.9828	-3.95247	0.00042535	0.0343698	-0.192627
GALNT7	208.03	916.317	3.95035	0.00042784	0.0344842	-0.197144
GHRLOS	-91.465	320.018	-3.94879	0.000429688	0.0345117	-0.200478
PSMA7	523.034	3097.66	3.94683	0.000432006	0.0345117	-0.204642
REEP5	734.734	5625.1	3.94533	0.000433796	0.0345117	-0.207842
XLOC_001430	-13.6106	21.6204	-3.94422	0.000435126	0.0345117	-0.21021
CECR7	-35.1436	81.0578	-3.94421	0.00043514	0.0345117	-0.210235
Q3T5P7	6.48976	31.6092	3.9442	0.00043515	0.0345117	-0.210253
PTPRC	2059.24	13662.6	3.94251	0.000437185	0.0345117	-0.213863
SRP14	5007.39	43830	3.94207	0.000437717	0.0345117	-0.214804
TRIM24	264.123	1033.58	3.94184	0.000437997	0.0345117	-0.215298
XLOC_008503	-5.14537	11.7749	-3.94098	0.000439032	0.0345117	-0.217125
SGPL1	121.836	751.055	3.94017	0.000440016	0.0345117	-0.218858
BMS1P5	-60.0342	150.863	-3.93794	0.000442723	0.0346393	-0.223604
PCNXL2	-113.423	302.066	-3.93664	0.000444309	0.0346788	-0.22637
HMGA1	-228.437	1107.81	-3.9346	0.000446813	0.0347896	-0.230721
PPM1D	74.1418	440.081	3.92849	0.000454401	0.0352947	-0.243753
TOMM20L	75.1306	397.8	3.92715	0.000456083	0.0353398	-0.246612
GNAI3	252.724	1090.29	3.92515	0.0004586	0.0354116	-0.250872
TOLLIP	590.626	2629.54	3.92466	0.000459217	0.0354116	-0.251913
XLOC_014097	-21.7848	54.1412	-3.92063	0.000464337	0.0355891	-0.260494
IGLL1	-2976.06	4142.2	-3.92056	0.000464434	0.0355891	-0.260656
LOC100507295	-10.8773	26.2976	-3.92023	0.000464847	0.0355891	-0.261344
TXNDC3	245.05	982.359	3.91898	0.000466449	0.0356267	-0.264006
GTF2A1	99.4352	578.484	3.9143	0.000472497	0.0360029	-0.273979
LOC283856	-15.1336	59.6177	-3.90967	0.000478559	0.036368	-0.283847
SLA	6311.49	23820.8	3.90773	0.000481119	0.036368	-0.287977
MFHAS1	-8.64989	31.5433	-3.90759	0.000481303	0.036368	-0.288272
XLOC_001560	-4.80005	10.3724	-3.9072	0.000481823	0.036368	-0.289109
SUPT4H1	3779.58	18246.1	3.90418	0.000485841	0.0364981	-0.295538
GBE1	147.453	674.189	3.90332	0.00048699	0.0364981	-0.297366
LOC100128822	161.765	720.036	3.90307	0.000487322	0.0364981	-0.297894
XLOC_l2_003156	1189.75	5661.56	3.90249	0.000488098	0.0364981	-0.299126
SPDYE2	-49.0124	102.168	-3.89686	0.000495708	0.036981	-0.311103
ISY1	80.349	516.52	3.89434	0.000499154	0.0371516	-0.316466
TSG101	526.347	3259.73	3.89206	0.000502295	0.0372989	-0.321323
UBQLN1	94.664	728.088	3.8906	0.000504309	0.0373236	-0.324422
XLOC_002730	-37.4316	242.074	-3.8893	0.000506114	0.0373236	-0.327187
LOC100509256	-30.7586	114.048	-3.8893	0.000506119	0.0373236	-0.327195
TMEM167A	206.058	986.185	3.88608	0.000510608	0.0374325	-0.334032
EP400	-52.9782	196.736	-3.88577	0.000511048	0.0374325	-0.334699
CAD	-108.611	379.569	-3.88574	0.000511096	0.0374325	-0.334772
USP21	-30.78	140.734	-3.88245	0.000515735	0.0375994	-0.341769
PSMD7	579.56	4097.5	3.88235	0.000515867	0.0375994	-0.341967
SNORA70F	-47.3305	143.073	-3.88163	0.000516891	0.0375994	-0.343501
SETD5	-33.6985	197.353	-3.88036	0.000518697	0.0376454	-0.346202
DNAJC5	208.956	1013.47	3.878	0.000522069	0.0378047	-0.351221
NPIP	-276.098	1119.55	-3.87542	0.000525787	0.0379881	-0.356715
PCGF3	47.6838	182.565	3.87442	0.000527232	0.0380069	-0.358841
PRPF18	87.4315	606.807	3.87322	0.000528961	0.0380461	-0.361376
XLOC_007339	-23.8713	49.2027	-3.87237	0.000530203	0.03805	-0.363193
LOC100506123	-168.035	389.788	-3.87069	0.000532656	0.03805	-0.366767
PAR-SN	-164.763	394.698	-3.86888	0.000535302	0.03805	-0.370604
TGFBR1	28.9037	164.684	3.8685	0.000535859	0.03805	-0.37141
VAC14	-30.6603	115.678	-3.86832	0.000536119	0.03805	-0.371786
OCM2	-29.8057	120.238	-3.86831	0.000536133	0.03805	-0.371806
XLOC_014229	-9.7046	24.5837	-3.86608	0.000539436	0.0381358	-0.376562
EIF2C1	254.645	1633.03	3.86588	0.000539719	0.0381358	-0.376968
C16orf72	369.085	1605.29	3.85888	0.000550186	0.0387899	-0.391844
FPGT	49.812	202.003	3.85664	0.000553575	0.0389011	-0.3966
CCDC30	13.9817	51.8473	3.85624	0.000554188	0.0389011	-0.397457
RARG	-73.4522	249.821	-3.85206	0.000560573	0.0392435	-0.40633
DNAJA2	45.8737	309.425	3.84973	0.000564161	0.0392435	-0.411272
RAB2A	827.466	4064.75	3.8486	0.000565907	0.0392435	-0.413666
TFEB	1198.2	6191.79	3.84844	0.000566156	0.0392435	-0.414007
TERF2	-34.6571	169.382	-3.84813	0.000566633	0.0392435	-0.414659
COX5A	743.035	4333.59	3.84682	0.000568677	0.0392435	-0.417448
PHF23	170.475	1159.34	3.84642	0.000569309	0.0392435	-0.418308
BCL2L12	281.106	1793.14	3.8461	0.000569802	0.0392435	-0.418978
UBASH3A	-97.5252	270.479	-3.84592	0.000570076	0.0392435	-0.419351
S1PR4	14331.1	73337.6	3.84271	0.000575112	0.0395054	-0.426163
MECP2	103.148	835.615	3.841	0.00057781	0.0396059	-0.429789
CD37	-1034.33	5067.57	-3.83958	0.000580068	0.0396759	-0.432811
LZIC	152.442	1045.34	3.83875	0.000581386	0.0396815	-0.434569
PMS2L2	-55.0549	259.513	-3.83636	0.000585202	0.0398571	-0.439636
SNORA70D	-57.7295	187.813	-3.83207	0.000592111	0.0402251	-0.448728
LOC283174	-29.6275	83.0155	-3.83146	0.000593113	0.0402251	-0.450038
XLOC_004804	-12.8386	35.1817	-3.82472	0.00060415	0.0408872	-0.464323
ZFAND5	658.31	3651.51	3.82296	0.000607069	0.0409196	-0.468056
DAZAP2	4851.19	23356.2	3.82289	0.00060718	0.0409196	-0.468198
LOC100506392	-14.8131	45.8791	-3.82014	0.000611772	0.0411426	-0.474035
EIF1B	377.084	1841.71	3.81824	0.000614948	0.0411842	-0.478047
XLOC_l2_007834	-10.4577	30.4815	-3.81824	0.000614958	0.0411842	-0.47806
RILPL2	3042.24	13591	3.81616	0.000618457	0.0412449	-0.482456
PREX1	8827.2	30737.5	3.81616	0.000618458	0.0412449	-0.482457
XLOC_l2_000804	-7.16742	12.05	-3.81409	0.000621965	0.0412449	-0.486839
PLEKHG3	3963.27	15867.3	3.81329	0.00062334	0.0412449	-0.488549
PICALM	2623.14	11753.5	3.81323	0.00062343	0.0412449	-0.488661
XLOC_012444	-55.0199	169.358	-3.81268	0.000624372	0.0412449	-0.48983
UQCRFS1	1069.26	6515.11	3.81229	0.000625033	0.0412449	-0.490651
TNFAIP1	120.091	1145.94	3.81091	0.000627409	0.0412449	-0.49359
CNIH4	572.941	2531.11	3.81034	0.000628375	0.0412449	-0.494783
CDKN2D	7216.58	26755.9	3.81014	0.000628722	0.0412449	-0.49521
PGAM4	1617.1	6355.42	3.80765	0.000633014	0.0413815	-0.500482
PSMD6	212.477	1937.11	3.80744	0.000633384	0.0413815	-0.500935
CREG1	1336.6	4733.23	3.80394	0.000639459	0.0416935	-0.508331
ARPC5	4456.91	20349.4	3.80296	0.000641186	0.0417213	-0.510421
TNNC1	-8.01742	18.4994	-3.80054	0.000645427	0.0418994	-0.515529
ZMIZ1	262.485	1435.07	3.79945	0.000647355	0.0418994	-0.517841
KRT18	-79.3874	308.65	-3.79791	0.000650091	0.0418994	-0.521109
SP3	446.189	2320.19	3.7958	0.000653837	0.0418994	-0.525561
KLF2	5689.45	44604.6	3.79529	0.000654757	0.0418994	-0.526651
TUSC2	603.112	5040.27	3.79486	0.000655525	0.0418994	-0.52756
TSEN34	8182.85	28438.6	3.79426	0.000656591	0.0418994	-0.528818
CD58	170.937	818.726	3.79362	0.000657742	0.0418994	-0.530176
XLOC_000055	-5.0472	10.3906	-3.79359	0.000657796	0.0418994	-0.53024
XLOC_004584	-10.9381	22.5311	-3.79285	0.000659134	0.0418994	-0.531814
C6orf26	-49.6708	159.476	-3.79275	0.00065931	0.0418994	-0.532021
LOC100132832	-26.0908	65.7912	-3.79259	0.000659597	0.0418994	-0.532358
UBL3	129.156	934.431	3.79129	0.000661936	0.0419649	-0.535101
LOC100508869	-5.54166	10.9734	-3.78656	0.000670554	0.0424274	-0.545126
LRRFIP2	107.661	667.799	3.78498	0.000673451	0.0424507	-0.548467
DPP8	370.408	2786.77	3.78491	0.000673568	0.0424507	-0.548601
TUBG2	-20.226	72.8832	-3.78195	0.00067903	0.042711	-0.554861
SLCO4C1	221.209	647.152	3.77904	0.000684445	0.0429673	-0.561016
ZMAT1	-52.8928	171.892	-3.77703	0.000688216	0.0430765	-0.565274
ATP6V0E1	1230.1	7854.74	3.77503	0.000691967	0.0430765	-0.569488
SAP30L	112.956	987.033	3.77491	0.000692205	0.0430765	-0.569754
XLOC_001023	-33.5612	106.302	-3.77484	0.000692327	0.0430765	-0.569891
LOC100507427	-13.5882	23.9481	-3.77454	0.000692898	0.0430765	-0.570529
FAM32A	254.91	1526.44	3.77312	0.000695576	0.0431594	-0.57352
SENP3	-114.313	423.432	-3.77051	0.000700551	0.0432327	-0.579043
ZER1	1104.76	6901.77	3.77015	0.000701237	0.0432327	-0.579801
XLOC_008475	-6.38992	16.5773	-3.77013	0.000701284	0.0432327	-0.579854
FAM100B	5429.99	26147.9	3.76967	0.000702149	0.0432327	-0.580809
CCDC23	181.074	1197.52	3.76788	0.000705584	0.043361	-0.584592
LOC100129387	-47.0372	118.831	-3.76651	0.00070823	0.0433796	-0.587493
LOC283922	-10.9477	33.9621	-3.76603	0.000709163	0.0433796	-0.588514
NBR1	566.325	3760.8	3.76484	0.000711469	0.0433796	-0.59103
SNORD11	-67.8334	148.811	-3.76397	0.000713149	0.0433796	-0.592858
FAM192A	122.67	859.167	3.7639	0.000713286	0.0433796	-0.593007
PPP2R3B-AS1	-66.1589	154.71	-3.76353	0.000714001	0.0433796	-0.593783
XLOC_008225	249.229	1676.05	3.76039	0.000720133	0.043515	-0.600412
TOR1AIP1	142.093	1073.55	3.75927	0.000722344	0.043515	-0.602787
NDUFB6	631.877	3501.76	3.75894	0.000722994	0.043515	-0.603485
TTC31	-38.7249	159.985	-3.75893	0.000722998	0.043515	-0.603489
IFI27L2	1338.52	5051.46	3.75893	0.000723013	0.043515	-0.603505
HBXIP	1487.39	8778.57	3.75488	0.000731018	0.0438511	-0.61204
SNORA34	931.447	3268.87	3.75473	0.00073133	0.0438511	-0.612371
RDH13	-33.1485	109.471	-3.75241	0.000735964	0.044017	-0.617267
CARD6	492.336	1560.52	3.75197	0.000736842	0.044017	-0.618191
HGS	2081.51	16244.9	3.75011	0.000740579	0.044158	-0.622112
GSR	119.503	613.104	3.74853	0.000743767	0.0441834	-0.625443
EPPK1	-9.5813	20.6124	-3.74851	0.000743814	0.0441834	-0.625492
FLJ46446	-66.7161	107.917	-3.74761	0.00074563	0.0441834	-0.627382
STK19	251.517	1642.23	3.7471	0.000746672	0.0441834	-0.628465
TRIM41	337.808	2420.25	3.7465	0.000747891	0.0441834	-0.629729
C10orf11	42.8814	100.552	3.74385	0.0007533	0.0443584	-0.635315
MEPCE	-47.2474	266.496	-3.7437	0.000753619	0.0443584	-0.635644
CCDC47	69.1798	450.923	3.74302	0.000755011	0.044359	-0.637075
RHEB	16.4693	98.4925	3.7419	0.000757322	0.0443778	-0.639443
COG7	-124.063	545.961	-3.74152	0.000758098	0.0443778	-0.640237
CD300A	848.209	3467.55	3.73998	0.000761285	0.0444832	-0.64349
C22orf25	519.708	3960.34	3.73863	0.00076408	0.0445653	-0.646331
C19orf43	-183.987	1485.04	-3.73472	0.000772247	0.0448115	-0.654573
BTN2A1	122.216	631.042	3.7347	0.000772288	0.0448115	-0.654614
C3orf43	-10.6172	31.537	-3.73398	0.000773803	0.0448115	-0.656133
PTPN23	-106.971	565.901	-3.73382	0.000774135	0.0448115	-0.656466
CCDC28A	1094.9	5934.44	3.73328	0.000775285	0.0448115	-0.657617
RBM8A	663.561	5262.33	3.73062	0.000780907	0.0449874	-0.663218
WDR6	-113.657	422.676	-3.73051	0.000781134	0.0449874	-0.663443
ZNF514	-9.79377	20.403	-3.72938	0.000783535	0.04503	-0.665823
ZNFX1-AS1	2302.74	14828	3.72877	0.00078483	0.04503	-0.667103
HSD17B6	-6.98831	12.0088	-3.72714	0.000788314	0.04503	-0.670538
OSTM1	52.1151	273.264	3.72701	0.000788603	0.04503	-0.670821
RNF13	1727.93	7240.47	3.7262	0.000790334	0.04503	-0.672521
AQP3	-77.6976	238.151	-3.72607	0.000790626	0.04503	-0.672808
RANBP3	165.304	1534.48	3.72557	0.000791699	0.04503	-0.673859
MAPK11	-22.1697	105.461	-3.72339	0.000796396	0.045217	-0.678445
DIS3L2	-22.1925	71.541	-3.7214	0.000800704	0.0453812	-0.682628
PLCG1	-45.8531	130.353	-3.71983	0.000804134	0.0454953	-0.685942
RSPRY1	209.522	1888.86	3.71831	0.000807468	0.0456035	-0.68915
RHOQ	519.604	2404.34	3.71745	0.00080936	0.04563	-0.690965
FLJ42393	-14.7198	46.1388	-3.71545	0.000813758	0.0457975	-0.695166
NANS	657.487	3436.28	3.71201	0.000821402	0.0461173	-0.702416
SCARNA22	544.169	1565.06	3.7113	0.000822971	0.0461173	-0.703895
NUDT3	113.909	622.06	3.71095	0.000823754	0.0461173	-0.704633
CHMP2A	4179.46	18471.7	3.70947	0.000827082	0.0462229	-0.707759
BTBD2	-79.0942	422.225	-3.7045	0.000838299	0.0465843	-0.718203
NCOA4	8056.03	37917.6	3.70388	0.000839729	0.0465843	-0.719525
FBXO42	93.3616	937.798	3.7034	0.000840807	0.0465843	-0.72052
CYP27A1	3548.11	6410.77	3.70293	0.000841882	0.0465843	-0.721511
ZNF580	-298.092	1573.76	-3.70275	0.000842289	0.0465843	-0.721886
BRAT1	732.114	4706.12	3.70174	0.000844612	0.0465843	-0.724021
MCC	-2.88703	5.43441	-3.70157	0.000844988	0.0465843	-0.724367
ATP7A	47.8149	337.328	3.7015	0.000845165	0.0465843	-0.724528
STYXL1	372.39	1539.94	3.69671	0.000856203	0.0468969	-0.734591
NFIL3	3022.22	7596.99	3.69662	0.000856424	0.0468969	-0.73479
SLC7A5	-20.3754	58.0715	-3.69569	0.000858576	0.0468969	-0.736736
IL11RA	-149.634	491.998	-3.69533	0.00085941	0.0468969	-0.737489
PLCG2	592.038	2559.78	3.69526	0.000859579	0.0468969	-0.737641
DDX59	55.4252	303.12	3.69456	0.000861212	0.0468969	-0.739113
WBP4	100.404	585.375	3.69415	0.000862166	0.0468969	-0.739972
SSH1	55.0579	226.791	3.694	0.000862532	0.0468969	-0.740301
IFNAR2	295.164	1810.56	3.69238	0.000866317	0.046974	-0.743696
C5orf45	-515.899	1623.62	-3.69202	0.000867162	0.046974	-0.744453
XLOC_l2_010330	-9.22856	27.1162	-3.69152	0.000868344	0.046974	-0.745508
LOC100505937	605.365	4542.26	3.68652	0.000880194	0.0474738	-0.756019
WDFY2	77.0923	470.217	3.68625	0.000880822	0.0474738	-0.756572
TMEM208	361.645	2633.16	3.6853	0.000883109	0.0474738	-0.758584
LOC644083	-5.18294	18.7428	-3.68479	0.000884309	0.0474738	-0.759636
SNORD7	-24.9885	74.5027	-3.68451	0.000884982	0.0474738	-0.760226
C4orf3	2413.79	12663.3	3.68337	0.000887719	0.0475411	-0.762621
MED13	273.985	2160.3	3.68173	0.000891676	0.0476734	-0.76607
DEGS1	315.679	2279.02	3.68052	0.000894597	0.0476749	-0.768606
NRG1	119.752	232.941	3.68049	0.000894675	0.0476749	-0.768674
UPF1	1298.94	6185.68	3.67695	0.000903305	0.0480155	-0.776118
SNORA12	269.446	827.598	3.67664	0.00090406	0.0480155	-0.776766
TMEM170B	228	726.339	3.6756	0.000906606	0.0480226	-0.778947
ZMPSTE24	778.234	4634.77	3.67536	0.000907189	0.0480226	-0.779445
XLOC_l2_013751	-5.49626	11.548	-3.67436	0.000909662	0.0480742	-0.781557
PDCD10	254.164	1618.97	3.67057	0.000919043	0.0484352	-0.789513
GPN3	225.293	925.139	3.67038	0.000919513	0.0484352	-0.78991
C4orf48	594.854	3707.68	3.66924	0.000922355	0.0485053	-0.792303
LSM6	410.439	2241.7	3.66701	0.000927931	0.0487187	-0.796977
DDHD2	-46.4767	136.778	-3.66578	0.000931024	0.0488012	-0.799558
PPAPDC3	18.2048	40.063	3.66346	0.000936872	0.0489572	-0.804414
XLOC_007433	-4.64116	15.5252	-3.66297	0.000938133	0.0489572	-0.805457
VPS13B	98.5818	689.611	3.66279	0.000938579	0.0489572	-0.805826
WDR45L	551.405	3737	3.66089	0.000943409	0.0490907	-0.809807
ZNF551	-22.7278	74.7737	-3.66058	0.000944199	0.0490907	-0.810456
USP38	198.201	1364.22	3.65674	0.000954073	0.0494152	-0.818524
PRPF8	-394.069	2123.75	-3.65587	0.000956296	0.0494152	-0.820329
XLOC_013621	-4.46531	12.1775	-3.65554	0.000957167	0.0494152	-0.821035
FAM198B	354.498	1275.65	3.65511	0.000958268	0.0494152	-0.821927
MAP3K5	336.176	1695.59	3.6544	0.000960108	0.0494152	-0.823415
C20orf177	231.417	1408.19	3.65434	0.000960279	0.0494152	-0.823552
RPL26L1	256.283	1588.95	3.65356	0.000962309	0.0494152	-0.825191
F7	-7.47326	21.6777	-3.65338	0.000962763	0.0494152	-0.825556
RPPH1	74.6684	332.365	3.65146	0.000967766	0.0495926	-0.829576
FLT3LG	-249.955	835.236	-3.65085	0.000969359	0.049595	-0.830852
C12orf26	49.242	294.214	3.64964	0.000972538	0.0496044	-0.833391
MYO5A	132.611	757.773	3.64961	0.000972636	0.0496044	-0.833469
TRMT2B	-101.175	353.28	-3.64893	0.000974404	0.0496157	-0.834877
CLPX	118.919	1077.61	3.64801	0.000976845	0.0496612	-0.836818
XLOC_002995	-23.8254	81.6779	-3.64722	0.000978931	0.0496885	-0.838472
CLIP3	-6.27914	11.8563	-3.64618	0.000981675	0.0497491	-0.840644
MKNK2	3528.2	16464	3.64452	0.000986101	0.0497854	-0.844132
HDHD3	-14.8953	36.9496	-3.64443	0.000986319	0.0497854	-0.844304
UGP2	220.059	1964.96	3.64416	0.000987048	0.0497854	-0.844877
EPHX3	192.381	1183.36	3.64303	0.00099007	0.0498594	-0.847248
PABPC1L	-40.8967	172.256	-3.64143	0.000994349	0.0498738	-0.850593
GRN	27210.8	100925	3.64114	0.000995122	0.0498738	-0.851196
MKLN1	63.6834	506.628	3.64086	0.000995879	0.0498738	-0.851786
XLOC_001699	77.4819	252.74	3.6406	0.000996574	0.0498738	-0.852327
IFNAR1	656.985	2282.63	3.63939	0.000999842	0.0499594	-0.854866
AK8	-11.4068	25.1014	-3.63547	0.00101048	0.0503187	-0.863074
TAB2	615.979	3728.68	3.63541	0.00101063	0.0503187	-0.863191
HMGN2	2604.01	19970.9	3.63501	0.00101174	0.0503187	-0.86404
GLIPR2	3656.21	18971.6	3.63373	0.00101524	0.0504149	-0.866723
HIST2H2AC	592.928	3423.93	3.6322	0.00101942	0.0505294	-0.869909
LOC100506965	-38.0216	70.0344	-3.63174	0.0010207	0.0505294	-0.87088
UBE2R2	365.862	1425.77	3.62871	0.00102908	0.0507919	-0.87722
ZDHHC20	39.2334	219.613	3.62868	0.00102917	0.0507919	-0.877289
LOC100506307	-8.63925	20.7448	-3.62792	0.00103127	0.0508175	-0.878873
FNIP1	168.784	558.219	3.62402	0.00104217	0.0512759	-0.887029
FSCN1	157.103	513.506	3.6234	0.00104392	0.051283	-0.888324
FAM45A	316.444	1718.47	3.61987	0.00105391	0.0516949	-0.895716
RAP1B	1852.99	11141.6	3.61885	0.00105682	0.0517581	-0.89785
ARF4	376.607	2737.79	3.6161	0.00106466	0.0520627	-0.903584
ATP6AP1	1516.27	7721.15	3.61484	0.00106829	0.052161	-0.906229
TMEM199	74.135	581.447	3.61419	0.00107015	0.0521722	-0.907576
RB1	235.092	1475.96	3.61121	0.00107877	0.0525115	-0.913799
LOC100129250	1004.76	3902.83	3.61066	0.00108038	0.0525115	-0.914957
LOC100507918	-210.272	541.273	-3.60784	0.00108861	0.0528314	-0.920843
SEC22B	137.416	971.971	3.60414	0.00109952	0.053214	-0.928578
SERF2	1090.4	12014.6	3.60404	0.00109981	0.053214	-0.928784
MIDN	2180.52	10694.6	3.60342	0.00110166	0.0532231	-0.930085
LOC100505641	375.442	2903.32	3.60253	0.0011043	0.0532707	-0.931946
XLOC_009459	-47.3994	176.121	-3.60003	0.00111174	0.0535188	-0.937153
COL25A1	2.67181	5.59957	3.59919	0.00111427	0.0535188	-0.938914
ARL8A	1277.52	7084.93	3.59913	0.00111445	0.0535188	-0.939042
TMEM59	935.974	6010.97	3.59778	0.00111851	0.0536331	-0.941857
HCFC1	-14.6017	44.3451	-3.59484	0.00112739	0.0539783	-0.947993
HN1	5426.07	18062.4	3.59377	0.00113062	0.0540526	-0.950216
MEN1	-70.5761	313.588	-3.5928	0.00113359	0.054114	-0.952252
WDR59	-100.135	479.056	-3.59165	0.0011371	0.0542008	-0.95465
VEGFA	27.5667	109.904	3.59044	0.0011408	0.0542963	-0.957166
LOC100653210	-684.827	1006.25	-3.58899	0.00114526	0.0543839	-0.960194
SLC25A5	1219.24	8070.72	3.58874	0.00114603	0.0543839	-0.960715
RBPJ	750.391	4287.5	3.5875	0.00114985	0.0544506	-0.963294
DNM1P46	-29.932	84.1468	-3.58719	0.00115083	0.0544506	-0.963957
LOC100653120	-7.28283	15.4582	-3.58385	0.00116119	0.0548103	-0.970912
SERINC1	765.097	4759.57	3.58301	0.00116381	0.0548103	-0.972659
BLOC1S3	98.3191	975.164	3.58291	0.00116412	0.0548103	-0.972868
ITK	-318.714	947.215	-3.58212	0.0011666	0.0548103	-0.974516
SEC11A	1659.76	11374.9	3.582	0.00116698	0.0548103	-0.974766
CDC14A	-22.1325	76.3068	-3.58077	0.00117083	0.0549046	-0.977324
RAB18	107.075	596.633	3.57981	0.00117388	0.0549046	-0.979343
C13orf15	-461.435	1377.8	-3.57956	0.00117466	0.0549046	-0.979859
ACBD5	51.167	313.243	3.57919	0.00117583	0.0549046	-0.980628
CARS2	4909.25	20415	3.57751	0.00118114	0.0549301	-0.984123
PLEKHB2	228.976	1774.27	3.57748	0.00118123	0.0549301	-0.984182
SIK1	-54.2689	116.76	-3.57674	0.00118359	0.0549301	-0.985732
CBX1	249.654	1467.42	3.57673	0.00118362	0.0549301	-0.985751
LOC100131289	-10.1852	17.8198	-3.57539	0.00118788	0.0549301	-0.98854
DACH1	65.7023	180.968	3.57527	0.00118828	0.0549301	-0.988801
IMPDH1	11113.2	43881.8	3.57524	0.00118836	0.0549301	-0.988853
SLC7A6OS	92.3869	644.02	3.57432	0.00119131	0.0549869	-0.990772
LZTS2	-46.1436	275.583	-3.57298	0.00119559	0.0550247	-0.993556
RNF135	778.278	3677.26	3.5726	0.00119682	0.0550247	-0.994356
PGLS	2104.73	13874.1	3.57246	0.00119727	0.0550247	-0.994646
CHMP3	190.756	1199.38	3.57135	0.00120084	0.0550797	-0.996959
SLCO3A1	153.646	680.692	3.57102	0.0012019	0.0550797	-0.99764
RAPH1	-76.0896	352.29	-3.56919	0.00120783	0.0552228	-1.00146
ZHX1-C8ORF76	47.5185	288.784	3.56899	0.00120847	0.0552228	-1.00187
SULF2	4997.45	15201.6	3.56611	0.00121787	0.0555732	-1.00788
ATP5I	2906.02	22052.3	3.56425	0.00122394	0.055771	-1.01174
NPR2	-16.6452	52.5075	-3.56196	0.0012315	0.056036	-1.01652
MIR600HG	-12.5951	18.1293	-3.55937	0.00124008	0.0562902	-1.0219
HTATIP2	273.531	1115.49	3.55857	0.00124275	0.0562902	-1.02357
LSM14B	33.7717	192.637	3.55843	0.00124321	0.0562902	-1.02385
STMN3	-117.952	384.713	-3.5579	0.00124496	0.0562902	-1.02495
SUMF2	-71.8677	283.701	-3.55764	0.00124586	0.0562902	-1.02551
ARFGEF1	103.453	784.016	3.55616	0.0012508	0.0564338	-1.02858
SUPT16H	-21.684	89.7895	-3.55459	0.00125609	0.0565928	-1.03185
MGC2752	149.452	770.839	3.55317	0.00126086	0.0567282	-1.03479
ARHGAP27	2761.27	16488.9	3.55174	0.00126571	0.0568667	-1.03777
MTF1	239.717	1006.12	3.55094	0.00126841	0.0569082	-1.03942
PITPNA	662.623	3695.31	3.54966	0.00127278	0.0570244	-1.04209
LOC100130856	56.7299	504.344	3.54902	0.00127498	0.0570435	-1.04343
FAM91A1	26.0843	172.544	3.54843	0.00127698	0.0570533	-1.04465
GALNT10	94.0532	565.354	3.54569	0.00128641	0.0573945	-1.05035
C8orf83	51.0126	204.532	3.5448	0.00128946	0.0574507	-1.05219
DYNLT1	1184.62	5409.37	3.54427	0.0012913	0.057453	-1.0533
LOC90834	-8.00384	15.7276	-3.54328	0.00129472	0.0575253	-1.05535
LOC100506538	-7.65711	23.9822	-3.54251	0.00129741	0.0575653	-1.05696
UCP2	-1147.68	4125.85	-3.54193	0.00129941	0.0575742	-1.05815
HIST1H3J	495.947	1548.3	3.54039	0.00130477	0.0577321	-1.06135
CLK3	482.924	2610.81	3.53946	0.00130804	0.057797	-1.06329
TRAF6	50.6119	430.869	3.53794	0.00131337	0.0578349	-1.06645
ARRDC5	-37.8141	97.8146	-3.53789	0.00131355	0.0578349	-1.06655
OSBPL8	64.8622	345.476	3.53756	0.00131471	0.0578349	-1.06724
NAP1L4	-24.7961	127.841	-3.53716	0.00131611	0.0578349	-1.06806
CLIC1	3259.6	18671.5	3.53532	0.0013226	0.0580408	-1.07188
EXOSC3	69.3174	511.267	3.53366	0.00132852	0.0582208	-1.07534
ALOX5	4604.33	14262.8	3.53251	0.0013326	0.0582537	-1.07772
HEBP1	731.656	2176.91	3.53243	0.0013329	0.0582537	-1.0779
LYPLA2	315.333	2979.1	3.53017	0.00134098	0.0583191	-1.08258
PSMD9	244.609	2015.27	3.52998	0.00134164	0.0583191	-1.08297
AFTPH	243.015	1915.79	3.52977	0.0013424	0.0583191	-1.08341
ABR	640.008	4891.08	3.52968	0.00134271	0.0583191	-1.08359
MID1IP1	2514.83	10814.5	3.52947	0.00134349	0.0583191	-1.08403
XLOC_011480	-15.8634	40.9675	-3.52855	0.0013468	0.0583839	-1.08595
LOC100507247	-4.05106	6.51912	-3.52588	0.00135645	0.0587229	-1.09148
SF3A1	250.719	1748.08	3.52373	0.00136429	0.0589824	-1.09595
NRBP2	-15.8359	33.7989	-3.52313	0.00136648	0.0589976	-1.0972
STK11IP	707.314	4035.64	3.52164	0.0013719	0.0590774	-1.10027
ANKRD36BP2	-59.3238	199.017	-3.52158	0.00137214	0.0590774	-1.1004
C1orf144	111.169	937.104	3.52111	0.00137385	0.0590774	-1.10137
SNORD63	-18.1203	49.0575	-3.51861	0.00138307	0.0593944	-1.10656
CRCP	20.4473	103.312	3.51577	0.0013936	0.0596943	-1.11244
C2orf72	-4.21514	7.45912	-3.51572	0.00139378	0.0596943	-1.11254
ZNF512B	-90.5066	298.892	-3.51474	0.00139746	0.0597723	-1.11459
OSBPL1A	40.7757	121.283	3.51295	0.00140417	0.059979	-1.1183
LOC728407	-19.3983	62.9307	-3.51224	0.00140682	0.0599966	-1.11977
TSPO	12955.2	59778.7	3.5114	0.00140999	0.0599966	-1.12151
LOC100131607	135.68	642.794	3.51134	0.00141019	0.0599966	-1.12162
KIAA0513	2078.13	8281.71	3.51073	0.00141249	0.060015	-1.12289
LENG8	-26.2936	123.034	-3.50983	0.00141591	0.0600477	-1.12476
SEPT6	-251.973	976.97	-3.50908	0.00141876	0.0600477	-1.12632
VASP	3096.66	11211	3.50904	0.00141888	0.0600477	-1.12639
NFAM1	3972.11	14430.7	3.50653	0.00142844	0.060373	-1.1316
TMEM107	377.458	1880.7	3.50375	0.00143906	0.0606477	-1.13735
MAZ	-26.8494	129.81	-3.50352	0.00143994	0.0606477	-1.13782
DUSP28	175.572	1025.8	3.50335	0.00144062	0.0606477	-1.13818
XLOC_l2_007832	-9.01749	26.7717	-3.5007	0.00145084	0.0609981	-1.14367
TNFRSF14	694.374	5480.89	3.49987	0.00145403	0.0610242	-1.14537
C20orf106	163.027	613.116	3.49956	0.00145527	0.0610242	-1.14603
AURKAPS1	-42.615	169.847	-3.499	0.00145743	0.0610351	-1.14718
SH2D3A	-275.089	985.769	-3.49844	0.00145962	0.061047	-1.14835
HERC2P2	-137.387	480.636	-3.49756	0.00146304	0.0610917	-1.15016
XLOC_l2_013868	-11.381	39.8247	-3.4952	0.00147228	0.0610917	-1.15505
CLIP1	230.869	1493.98	3.4949	0.00147344	0.0610917	-1.15566
AKAP2	-13.0811	20.9422	-3.49482	0.00147378	0.0610917	-1.15584
HPS6	1254.05	6409.65	3.49467	0.00147435	0.0610917	-1.15614
ANK1	-21.6497	54.2699	-3.49456	0.00147481	0.0610917	-1.15638
PPP1R12A	279.013	1595.03	3.49442	0.00147535	0.0610917	-1.15666
GNA13	330.238	2169.97	3.49409	0.00147664	0.0610917	-1.15734
LINS	-60.0928	271.678	-3.49375	0.00147799	0.0610917	-1.15805
LMBRD1	1323.32	5758.67	3.49331	0.00147973	0.0610917	-1.15896
AARS	-36.3303	135.142	-3.49264	0.00148236	0.0611218	-1.16034
LOC100131662	-64.6626	146.808	-3.49099	0.00148888	0.0612367	-1.16375
TXNDC9	122.303	979.793	3.49097	0.00148897	0.0612367	-1.16379
CDR2	-65.3756	213.589	-3.49032	0.00149155	0.0612644	-1.16514
MPP1	1215.1	4884.36	3.486	0.00150884	0.0618954	-1.17408
GDAP2	19.162	167.776	3.48342	0.00151924	0.0621842	-1.17941
PPM1B	92.9889	814.964	3.48289	0.00152138	0.0621842	-1.1805
LOC100505637	-133.695	408.428	-3.48281	0.0015217	0.0621842	-1.18066
LOC100505519	22.1238	133.454	3.48223	0.00152405	0.0622011	-1.18186
UBE2Q2P2	-12.1706	22.0621	-3.48061	0.00153064	0.0623657	-1.18521
TXN	5675.19	17796.6	3.48012	0.00153266	0.0623657	-1.18623
FAM177B	-92.6753	161.388	-3.47981	0.00153392	0.0623657	-1.18686
KRTAP12-2	-32.6036	123.263	-3.47913	0.00153671	0.0624003	-1.18828
MAP4K1	-278.093	902.947	-3.47816	0.00154067	0.062416	-1.19027
POU6F1	-22.8855	64.3763	-3.47808	0.00154099	0.062416	-1.19043
SETD3	13.9736	105.75	3.47688	0.00154596	0.0625382	-1.19293
LOC100190939	-72.4213	343.702	-3.47606	0.00154932	0.0625695	-1.19461
SQRDL	4858.35	20898	3.47574	0.00155063	0.0625695	-1.19527
SLC16A5	1384.79	5198.23	3.47465	0.00155516	0.0626734	-1.19754
MVP	6051.42	36918.2	3.47336	0.0015605	0.0628096	-1.20019
HSBP1	441.268	2632.5	3.47256	0.00156381	0.0628114	-1.20184
FAM153B	-228.435	447.05	-3.47213	0.00156563	0.0628114	-1.20274
SLC16A3	10632.5	41242.2	3.47194	0.00156642	0.0628114	-1.20313
CAMK2G	493.111	2425.97	3.47131	0.00156905	0.0628385	-1.20443
LOC202181	-26.0925	104.063	-3.4699	0.00157493	0.0629954	-1.20734
FGR	11760.6	61639.7	3.46895	0.00157893	0.0630767	-1.2093
SNORD28	21.7133	113.048	3.46803	0.00158279	0.0631069	-1.21119
PIGU	-20.8199	79.2878	-3.46783	0.00158362	0.0631069	-1.2116
RN28S1	12755.1	171781	3.46582	0.00159213	0.0633671	-1.21576
SDR39U1	-349.179	1473.1	-3.46501	0.00159555	0.0634246	-1.21742
LOC100127886	-22.9972	51.905	-3.46307	0.00160381	0.0635872	-1.22143
MRPL33	525.269	3576.82	3.46287	0.00160466	0.0635872	-1.22184
ZFP36L1	2296.91	14562.7	3.46265	0.00160559	0.0635872	-1.22229
LOC255411	-6.23799	12.5343	-3.46107	0.00161237	0.063742	-1.22556
RELT	1809.48	8673.62	3.46081	0.00161347	0.063742	-1.22609
LOC644961	5430.99	50778.1	3.46032	0.00161559	0.0637472	-1.22711
NARFL	-57.6911	299.692	-3.45951	0.00161907	0.063806	-1.22877
LOC100505564	-14.1381	26.8652	-3.45823	0.00162459	0.0638853	-1.23141
ANKRD58	1038.48	3816.11	3.45812	0.00162506	0.0638853	-1.23164
MCTS1	186.28	1432.31	3.4573	0.00162859	0.0639455	-1.23332
SDF2	265.344	1159.31	3.45567	0.00163566	0.0641271	-1.23669
RAP1A	2743.54	17881.8	3.45532	0.00163721	0.0641271	-1.23742
NFKBIA	3966.45	17150.8	3.45452	0.0016407	0.0641855	-1.23907
SP100	422.245	4757.64	3.45373	0.00164412	0.0642407	-1.24068
HYAL2	562.901	2991.08	3.45324	0.00164625	0.064246	-1.24169
MED1	-13.7209	92.5611	-3.45062	0.00165779	0.0645705	-1.24711
LOC100129399	-30.6605	74.7445	-3.45022	0.00165955	0.0645705	-1.24793
FICD	-57.0235	286.771	-3.44998	0.00166061	0.0645705	-1.24843
TMEM63A	-38.809	182.044	-3.44902	0.00166483	0.0646021	-1.25039
SNORA58	-11.3429	30.8186	-3.44863	0.00166655	0.0646021	-1.25119
KLHL28	86.2538	610.399	3.44838	0.00166766	0.0646021	-1.25171
UGGT1	84.4023	462.326	3.44797	0.00166948	0.0646021	-1.25256
MAGED4B	-34.6404	54.6534	-3.44707	0.0016735	0.0646798	-1.25442
XLOC_l2_014602	42.0016	217.001	3.4435	0.00168941	0.0652162	-1.26176
SLC26A5	-9.26824	25.9305	-3.44259	0.00169349	0.065295	-1.26363
PDZD8	152.165	448.854	3.44116	0.00169996	0.0653926	-1.26659
UBE2W	209.564	1122.86	3.44091	0.00170107	0.0653926	-1.2671
NDUFAF1	165.471	1191.41	3.44067	0.00170214	0.0653926	-1.26759
ANO9	-64.9492	202.973	-3.44017	0.00170442	0.0654022	-1.26863
NSUN5	-462.621	2988.73	-3.43904	0.00170952	0.0654044	-1.27094
SNORA49	37.2126	186.453	3.43853	0.00171186	0.0654044	-1.272
IQGAP1	7637.92	32820.6	3.43822	0.00171326	0.0654044	-1.27264
ABCC10	-26.2665	136.211	-3.43801	0.00171423	0.0654044	-1.27308
ATP6V1C1	394.929	1928.22	3.43755	0.0017163	0.0654044	-1.27401
BCL2L15	-8.19064	35.4531	-3.43746	0.00171671	0.0654044	-1.2742
GPR15	-37.0827	43.7781	-3.43345	0.00173509	0.0657409	-1.28246
SARM1	-28.4619	110.455	-3.43172	0.00174307	0.0657409	-1.28602
LOC651536	-31.4328	63.2911	-3.4316	0.00174362	0.0657409	-1.28626
PPP1R3D	437.744	1744.81	3.43103	0.00174626	0.0657409	-1.28744
DAD1	1044.51	8493.4	3.43092	0.00174677	0.0657409	-1.28766
ND5	-995.779	4783.79	-3.43082	0.00174724	0.0657409	-1.28787
XLOC_000812	-27.1971	68.2699	-3.43065	0.00174801	0.0657409	-1.28821
NPAS2	-2.5069	4.6271	-3.43027	0.00174977	0.0657409	-1.289
ENY2	726.87	5462.24	3.42984	0.00175176	0.0657409	-1.28988
ARID5B	-95.6845	379.963	-3.42932	0.00175417	0.0657409	-1.29094
RAB7A	3418.45	14109.7	3.42894	0.00175596	0.0657409	-1.29173
FNDC3B	224.048	1100.89	3.42889	0.00175617	0.0657409	-1.29182
CYB5R4	455.769	1961.72	3.42877	0.00175675	0.0657409	-1.29208
ABHD8	252.234	1660.76	3.42851	0.00175795	0.0657409	-1.29261
KCNJ14	-23.838	69.8003	-3.42805	0.0017601	0.0657409	-1.29356
ADAM8	19939.1	83556.9	3.42794	0.0017606	0.0657409	-1.29378
FBP1	406.17	1238.81	3.42737	0.00176327	0.0657409	-1.29495
SLC35E1	108.459	901.214	3.42707	0.00176465	0.0657409	-1.29556
TMX1	609.826	3487.07	3.42691	0.00176543	0.0657409	-1.2959
GNS	2586.37	10598.8	3.42644	0.00176761	0.0657409	-1.29686
SAT1	3089.55	13658.9	3.42608	0.00176929	0.0657409	-1.2976
ZNF438	769.015	2514.79	3.4258	0.00177063	0.0657409	-1.29819
XLOC_013994	-535.738	2483.09	-3.42445	0.00177699	0.0659006	-1.30097
CHMP1B	503.368	1752.79	3.42369	0.00178054	0.065956	-1.30251
ABI2	-35.4732	116.09	-3.42296	0.001784	0.0660073	-1.30402
NUMA1	-68.5454	369.598	-3.4222	0.00178759	0.0660073	-1.30558
TXNDC5	-365.874	659.091	-3.42199	0.00178857	0.0660073	-1.30601
ATP6AP2	713.82	3830.15	3.4216	0.00179044	0.0660073	-1.30681
SNX10	502.899	2125.29	3.42122	0.00179225	0.0660073	-1.3076
ESRRA	326.045	2601.01	3.42079	0.00179427	0.0660073	-1.30847
MOB4	104.646	930.965	3.42029	0.00179664	0.0660189	-1.3095
LRIG1	-236.9	866.439	-3.41697	0.00181255	0.0664217	-1.31634
HMHA1	8775.07	84286.8	3.4168	0.00181336	0.0664217	-1.31668
RNF130	1997.07	9166.86	3.41559	0.00181915	0.0664217	-1.31915
JTB	991.853	11020.2	3.41559	0.00181917	0.0664217	-1.31916
C1orf145	-12.8481	10.6235	-3.41544	0.00181988	0.0664217	-1.31947
ARID3A	574.372	2202.69	3.41541	0.00182003	0.0664217	-1.31953
JKAMP	115.279	758.628	3.41457	0.00182407	0.066434	-1.32125
CD302	681.646	3062.86	3.41448	0.00182451	0.066434	-1.32144
TIMM17B	583.085	6285.65	3.41312	0.00183112	0.0665349	-1.32424
SUPT6H	-120.313	917.728	-3.41305	0.00183142	0.0665349	-1.32437
XLOC_l2_000123	7860.55	57902.5	3.41164	0.00183826	0.0667078	-1.32726
ATP5E	6228.73	54367.4	3.40954	0.00184854	0.066916	-1.33159
PCNXL3	-29.7956	200.676	-3.40924	0.00184997	0.066916	-1.33219
XLOC_011184	-7.99862	14.9513	-3.40907	0.00185082	0.066916	-1.33254
COX8A	2255.5	20548	3.40876	0.00185235	0.066916	-1.33318
FBXL22	-13.6718	33.8796	-3.40797	0.00185624	0.0669812	-1.33481
NDEL1	1676.74	6455.13	3.40566	0.00186761	0.0673159	-1.33955
LTK	-190.997	681.722	-3.4049	0.00187136	0.0673285	-1.3411
ARF5	3499.12	24399.3	3.40474	0.00187216	0.0673285	-1.34143
BRI3	5841.29	23478.9	3.4028	0.0018818	0.0675995	-1.34542
HMGB2	1833.32	7283.78	3.40177	0.00188692	0.0677075	-1.34752
AGPAT4-IT1	-103.757	263.076	-3.4004	0.00189374	0.0678764	-1.35032
PDCD6	571.851	5140.76	3.39897	0.00190094	0.0680355	-1.35326
LOC100507599	-5.34548	10.8172	-3.39867	0.00190242	0.0680355	-1.35387
ETS1	-132.254	424.872	-3.39825	0.00190456	0.0680361	-1.35474
NR3C1	646.806	4156.24	3.39646	0.0019136	0.0682828	-1.35841
SEPHS2	341.71	2719.71	3.39512	0.00192037	0.0684484	-1.36115
SYF2	30.3555	180.064	3.39368	0.00192771	0.0686337	-1.36411
ING3	151.322	1065.54	3.39119	0.00194041	0.068868	-1.3692
SSR1	488.707	3486.29	3.39119	0.00194043	0.068868	-1.36921
CATSPER2	-39.7389	79.169	-3.39104	0.00194117	0.068868	-1.36951
XLOC_009363	11.3479	41.9139	3.39071	0.00194288	0.068868	-1.37019
RIOK3	603.598	4686.39	3.38783	0.0019577	0.0692515	-1.37608
MYLIP	1075.65	3896.93	3.38777	0.00195801	0.0692515	-1.37621
CCDC72	2124.6	8405.94	3.38643	0.00196498	0.0694214	-1.37896
LOC100131564	-98.2537	385.997	-3.38512	0.00197179	0.06955	-1.38165
C21orf96	-150.14	350.405	-3.38489	0.00197296	0.06955	-1.3821
GSTM1	-60.052	87.3112	-3.38416	0.00197679	0.0695841	-1.38361
XLOC_l2_008888	-6.18549	14.777	-3.38332	0.00198118	0.0695841	-1.38533
LOC100653257	-23.1736	76.9517	-3.38317	0.00198197	0.0695841	-1.38564
OXER1	1176.05	2665.29	3.38272	0.0019843	0.0695841	-1.38655
SRM	-126.64	605.875	-3.38263	0.00198477	0.0695841	-1.38673
FTSJD1	-63.9391	258.377	-3.38147	0.00199085	0.0697212	-1.38911
SUZ12	246.638	1999.63	3.3795	0.00200126	0.0699803	-1.39315
LINC00202	-5.70134	16.1678	-3.37924	0.00200261	0.0699803	-1.39367
RNF141	879.224	3226.47	3.37811	0.00200857	0.070112	-1.39598
LPCAT4	-20.2097	108.549	-3.37665	0.00201635	0.070307	-1.39897
TIMP2	4726.11	18980.2	3.37497	0.00202532	0.0705431	-1.40242
JAK2	296.568	1073.3	3.3738	0.00203154	0.0706832	-1.4048
NPC2	5290	23108.3	3.37303	0.00203566	0.0706835	-1.40637
SRSF4	554.554	5249.24	3.37298	0.00203596	0.0706835	-1.40648
RASSF3	86.0343	310.637	3.37164	0.00204313	0.0708557	-1.40921
TBPL1	100.354	839.85	3.36901	0.00205736	0.071272	-1.41459
LOC283710	-23.6234	52.4856	-3.36848	0.00206024	0.0712949	-1.41567
MGC12488	-43.6086	90.5258	-3.36799	0.00206292	0.0713107	-1.41668
XLOC_l2_015127	174.452	867.745	3.36679	0.00206945	0.0714597	-1.41913
IL1RN	3121.28	10388.1	3.36576	0.00207508	0.0715768	-1.42124
XLOC_005578	-15.7943	63.4889	-3.36382	0.0020857	0.0717934	-1.4252
TMX4	1234.78	4701.59	3.36377	0.00208596	0.0717934	-1.42529
SEP15	710.658	6007.46	3.36272	0.00209173	0.0717934	-1.42744
ATP6V0C	11004.6	68509.3	3.36244	0.00209329	0.0717934	-1.42802
CPSF3L	504.549	4096.35	3.36243	0.00209335	0.0717934	-1.42804
SEPT1	-256.805	865.715	-3.36217	0.00209479	0.0717934	-1.42857
KIAA0754	-27.344	68.7082	-3.36071	0.00210284	0.0719308	-1.43154
TRIM28	-290.881	1558.41	-3.36063	0.00210328	0.0719308	-1.43171
GALNT1	89.7608	546.535	3.35976	0.00210812	0.0720196	-1.43349
RAB1A	456.979	2602.08	3.35869	0.00211405	0.0721453	-1.43567
STIP1	-41.1771	179.393	-3.35762	0.00212003	0.0722725	-1.43786
TPM4	311.362	1785.79	3.35403	0.00214016	0.0728411	-1.44518
OBSCN	-12.6554	55.4484	-3.35384	0.00214125	0.0728411	-1.44558
RELL2	-188.948	1179.45	-3.35292	0.00214644	0.0728849	-1.44746
SNORD56B	-8.82346	16.6025	-3.35218	0.00215058	0.0728849	-1.44895
HINT3	381.375	1879.67	3.35215	0.00215077	0.0728849	-1.44902
LYST	662.25	3047.66	3.352	0.00215162	0.0728849	-1.44933
LOC100506294	44.5966	278.818	3.35007	0.00216256	0.0731779	-1.45326
JDP2	1199.67	4387.3	3.34935	0.00216665	0.073239	-1.45472
LOC100131929	-14.3044	43.3417	-3.34868	0.00217052	0.0732926	-1.45611
FOXJ2	-20.412	108.453	-3.34714	0.00217933	0.0735129	-1.45925
TLR8	470.395	1642.29	3.34663	0.00218222	0.0735331	-1.46028
CLEC3B	288.827	758.565	3.34598	0.00218598	0.0735385	-1.46161
RPRD2	-48.8085	311.309	-3.34578	0.00218713	0.0735385	-1.46202
FCHO1	1239.11	8052.75	3.34533	0.00218973	0.0735385	-1.46294
NCF2	6594.19	23394.8	3.34501	0.00219155	0.0735385	-1.46358
PIK3CA	35.1398	378.635	3.34184	0.00220986	0.0740755	-1.47004
TINF2	902.091	7750.63	3.33941	0.00222407	0.0743995	-1.475
TAX1BP1	1173.94	8601.99	3.33939	0.00222417	0.0743995	-1.47504
XLOC_l2_013001	-5.63613	12.8842	-3.33889	0.0022271	0.0744199	-1.47606
SERPINB1	2016.8	10127	3.33845	0.00222967	0.0744283	-1.47695
FAM188A	27.6538	211.691	3.33762	0.0022345	0.0745121	-1.47863
H2AFY	1134.4	5796.29	3.33636	0.00224196	0.0746148	-1.48122
SUMO1	96.9378	998.284	3.33631	0.00224223	0.0746148	-1.48131
SH2D4B	3.25289	6.08153	3.33493	0.00225037	0.074808	-1.48412
STAT5B	875.755	4062.73	3.33433	0.00225393	0.0748487	-1.48534
XLOC_l2_015938	-320.435	1140.9	-3.33347	0.002259	0.0749396	-1.48709
WSB2	460.275	2138.04	3.33298	0.00226192	0.074959	-1.48809
HDAC2	99.5616	695.388	3.33251	0.00226473	0.0749745	-1.48905
EIF4E2	459.571	3295.57	3.32851	0.00228865	0.0756884	-1.4972
LOC100128498	-29.8136	185.112	-3.32747	0.00229488	0.0758162	-1.4993
CUTC	56.5305	352.968	3.32646	0.00230096	0.0759389	-1.50136
XLOC_l2_008151	-224.48	589.694	-3.32409	0.00231532	0.0763073	-1.50618
RAD23B	33.1706	313.291	3.32345	0.00231924	0.0763073	-1.50749
DPP4	-158.019	437.673	-3.32344	0.00231926	0.0763073	-1.5075
SERPINF1	-107.002	252.118	-3.3219	0.00232869	0.0765391	-1.51064
ATP6	-10225.3	50927.5	-3.321	0.00233418	0.0766105	-1.51247
VSIG1	-29.3072	90.5951	-3.32076	0.00233564	0.0766105	-1.51295
KIF3C	36.8179	108.01	3.31826	0.00235099	0.077035	-1.51803
CNOT3	179.957	1714.36	3.31691	0.00235936	0.0772306	-1.52079
FAM159A	-128.619	461.449	-3.31566	0.00236712	0.0773784	-1.52333
BRWD3	44.7898	222.223	3.3154	0.0023687	0.0773784	-1.52385
THAP6	60.3219	462.505	3.31372	0.00237919	0.0776418	-1.52727
ARMCX4	-4.46905	13.7247	-3.31228	0.00238817	0.0778557	-1.53019
ATP5J	963.074	8673.55	3.31084	0.00239719	0.0780391	-1.53312
RN18S1	2815.69	6399.27	3.3106	0.00239866	0.0780391	-1.53359
NPIPL2	-1225.95	5453.78	-3.30791	0.00241566	0.0785127	-1.53907
SF1	-508.494	3605.86	-3.30627	0.00242605	0.0787704	-1.54239
ZFYVE27	1269.77	9884.32	3.30485	0.00243509	0.0789842	-1.54528
NQO2	263.239	627.631	3.30343	0.00244412	0.079197	-1.54815
RRN3P2	-16.4418	59.7894	-3.30279	0.00244823	0.0792499	-1.54945
AMT	-77.6466	354.075	-3.29935	0.00247039	0.0798867	-1.55643
ERVMER34-1	-8.07639	30.7789	-3.29825	0.00247752	0.0799763	-1.55866
C8orf76	107.179	1012.77	3.29803	0.00247891	0.0799763	-1.5591
XPO7	314.705	2904.13	3.29777	0.00248064	0.0799763	-1.55964
LOC100507101	-3.75569	5.25681	-3.297	0.00248561	0.080035	-1.56119
C4BPA	-1124.98	762.666	-3.29648	0.00248901	0.080035	-1.56225
NEIL2	-9.22339	27.0777	-3.29634	0.00248994	0.080035	-1.56254
THOC6	-17.5531	88.9097	-3.29404	0.00250493	0.080436	-1.56719
KIAA0430	953.17	6722.45	3.29197	0.00251857	0.0807932	-1.5714
TCEA2	-17.8488	82.0697	-3.29111	0.00252421	0.0808933	-1.57314
KIAA0913	1019.61	7322.02	3.28873	0.00254001	0.0813184	-1.57797
MICAL3	-15.3291	38.8719	-3.28409	0.00257097	0.0822276	-1.58736
OPN1MW	-5.24703	18.2261	-3.28344	0.00257531	0.0822841	-1.58867
XLOC_013181	-22.5267	27.0905	-3.28272	0.0025802	0.0823586	-1.59014
KNTC1	-32.2811	172.444	-3.28046	0.00259546	0.0826582	-1.59471
CKAP4	836.119	1936.98	3.28031	0.00259647	0.0826582	-1.59501
SPINK2	-45.5177	74.5079	-3.28019	0.00259732	0.0826582	-1.59526
SNORD80	-30.9585	131.357	-3.27959	0.00260138	0.0826873	-1.59647
CHCHD1	265.609	1964.6	3.27847	0.00260898	0.0826873	-1.59873
SLC44A1	91.7244	727.122	3.27833	0.00260996	0.0826873	-1.59903
HECTD3	-34.4631	189.101	-3.278	0.00261222	0.0826873	-1.5997
RGS3	197.144	1021.65	3.27797	0.00261241	0.0826873	-1.59975
LOC100130579	-4.62399	10.5974	-3.27773	0.00261402	0.0826873	-1.60023
RRAGA	485.852	4115.27	3.2774	0.00261628	0.0826873	-1.6009
HNRNPUL1	-117.768	758.761	-3.27464	0.00263517	0.0831683	-1.60647
CCR6	-210.36	713.177	-3.27442	0.00263668	0.0831683	-1.60692
LOC100129186	-18.2578	134.768	-3.27346	0.00264329	0.0832949	-1.60886
METTL19	-73.2318	388.905	-3.27278	0.00264801	0.0833615	-1.61024
CD46	172.07	716.1	3.27225	0.00265167	0.0833951	-1.61131
TRAF7	68.8428	465.366	3.27178	0.00265496	0.0834169	-1.61228
GADD45B	1417.08	6901.19	3.26763	0.00268386	0.0842423	-1.62066
GMFB	36.0319	298.045	3.26679	0.00268975	0.0843446	-1.62236
XLOC_011306	-3.87896	8.06654	-3.26604	0.002695	0.0844267	-1.62387
FEM1C	85.6487	498.127	3.26504	0.00270203	0.0845642	-1.62589
XRCC4	65.8994	332.722	3.26447	0.00270605	0.0846076	-1.62704
ARFIP1	316.156	1252.05	3.26386	0.00271035	0.0846596	-1.62828
PSMB3	1649.77	10311.5	3.2634	0.00271359	0.0846714	-1.6292
ST6GALNAC3	38.1033	110.047	3.26298	0.00271659	0.0846714	-1.63006
PAPL	-59.7511	297.063	-3.26269	0.00271865	0.0846714	-1.63064
FRYL	99.7865	709.705	3.26212	0.00272266	0.0847056	-1.63179
RCOR1	612.739	3049.1	3.26179	0.00272503	0.0847056	-1.63246
NLRP7	-27.4146	28.591	-3.26077	0.00273229	0.0848493	-1.63452
SCMH1	-13.6384	55.9674	-3.25994	0.00273821	0.0848951	-1.6362
CHST15	872.972	2849.7	3.25887	0.00274583	0.0848951	-1.63835
VPS18	220.226	1555.84	3.25879	0.00274637	0.0848951	-1.63851
ADAT1	-56.8827	271.567	-3.25874	0.00274677	0.0848951	-1.63862
TSNAX	80.4028	740.252	3.25871	0.002747	0.0848951	-1.63868
TJAP1	-78.0978	442.306	-3.25625	0.00276464	0.0853579	-1.64364
CTDSP2	2564.78	15332.2	3.25458	0.00277671	0.0855733	-1.64702
MGRN1	952.871	4780.83	3.25424	0.00277917	0.0855733	-1.6477
LOC100287598	-12.0401	30.7349	-3.25374	0.00278277	0.0855733	-1.64871
SIAH2	604.355	4666.57	3.25354	0.00278424	0.0855733	-1.64912
VIM	10967.5	60064.1	3.25344	0.00278495	0.0855733	-1.64931
NR6A1	93.1786	281.474	3.2527	0.0027903	0.085613	-1.6508
RRP1B	-105.935	422.793	-3.25222	0.0027938	0.085613	-1.65177
MAP2K4	781.403	3262.81	3.25213	0.00279445	0.085613	-1.65195
DCHS1	-26.9827	63.8602	-3.25179	0.00279692	0.085613	-1.65264
HSPA1L	49.7766	219.449	3.25097	0.00280293	0.0856752	-1.6543
BCL9L	-119.614	410.506	-3.25078	0.0028043	0.0856752	-1.65468
ZFAND6	577.647	3826.45	3.24826	0.00282278	0.0860519	-1.65977
GUSB	829.913	4784.48	3.24823	0.00282296	0.0860519	-1.65982
LYN	5693.16	27717	3.248	0.00282467	0.0860519	-1.66029
ZNF646	131.993	1075.83	3.24724	0.00283025	0.0861399	-1.66181
ADIPOR2	147.279	1173.78	3.24594	0.00283983	0.0863146	-1.66443
LOC100131490	32.5378	218.969	3.24543	0.00284361	0.0863146	-1.66546
SNX6	246.254	2152.67	3.24528	0.00284476	0.0863146	-1.66578
APBB1	-48.338	114.202	-3.24501	0.00284675	0.0863146	-1.66632
PSMD12	83.6021	721.217	3.24384	0.0028554	0.0863759	-1.66867
LDLRAP1	-128.187	410.585	-3.24355	0.00285756	0.0863759	-1.66925
CLCC1	-19.8767	98.9881	-3.24353	0.00285772	0.0863759	-1.6693
RABL2B	-106.674	416.132	-3.24298	0.00286178	0.0863759	-1.6704
ANKRD35	100.901	250.147	3.24292	0.00286223	0.0863759	-1.67052
XLOC_003738	-236.913	613.221	-3.24145	0.00287324	0.0866266	-1.67349
RAB21	204.365	1512.73	3.23945	0.00288823	0.0869968	-1.67752
FGFR4	17.7783	112.992	3.23871	0.00289376	0.0870814	-1.67901
LOC100509487	-54.1529	144.888	-3.23807	0.0028986	0.0871455	-1.6803
FOXO3	927.285	3897.54	3.23703	0.00290639	0.0871505	-1.68238
GPKOW	207.156	1574.84	3.2369	0.00290739	0.0871505	-1.68265
C16orf57	848.578	3661.07	3.2369	0.00290739	0.0871505	-1.68265
SLIRP	671.895	4182.8	3.23661	0.00290963	0.0871505	-1.68324
PSMA6	1422.07	9136.71	3.2359	0.00291494	0.0871633	-1.68466
PSMB9	5814.09	23775.9	3.2355	0.00291803	0.0871633	-1.68548
LOC100506775	33.168	166.75	3.23544	0.00291847	0.0871633	-1.68559
RET	-8.46932	25.9671	-3.23511	0.00292093	0.0871633	-1.68625
TYROBP	25610.3	162259	3.23409	0.00292874	0.0873151	-1.68831
CAP1	949.243	4485.59	3.23367	0.00293189	0.0873279	-1.68915
PRR20B	-5.45983	10.1427	-3.23286	0.0029381	0.0873531	-1.69079
CNIH	211.587	1326.02	3.23285	0.00293818	0.0873531	-1.69081
EGFL8	-63.77	196.516	-3.23198	0.00294478	0.0874681	-1.69255
LOC100507507	320.901	1353.57	3.23113	0.00295132	0.0875814	-1.69426
EAPP	357.963	3034.03	3.22936	0.00296495	0.0879044	-1.69783
CDKN1B	412.84	2927.43	3.22783	0.00297676	0.0881732	-1.70091
UBE2Q2P3	-37.8014	98.2883	-3.22654	0.00298674	0.0883872	-1.70351
DAPK3	430.418	3770.51	3.22579	0.00299252	0.0884765	-1.705
OLIG1	1293.89	3219.97	3.22492	0.00299931	0.0885955	-1.70676
ZNF512	-63.364	262.783	-3.22418	0.00300506	0.0886837	-1.70824
KIAA0922	324.664	2169.96	3.22354	0.00301003	0.0887489	-1.70952
TATDN3	82.1506	542.825	3.22213	0.00302109	0.0889932	-1.71236
ZCCHC6	58.4977	307.317	3.22042	0.00303457	0.0893084	-1.71581
C1GALT1C1	184.868	1334.16	3.21976	0.0030397	0.0893546	-1.71712
PIK3CG	275.327	1370.04	3.21939	0.00304267	0.0893546	-1.71788
LRRK2	444.245	1490.1	3.21916	0.0030445	0.0893546	-1.71834
NOP10	5635.66	25015.3	3.21804	0.00305337	0.0895329	-1.72059
PSMB1	1629.12	14168.2	3.21729	0.00305928	0.0896242	-1.72209
NUP210	-118.686	515.263	-3.21639	0.00306642	0.0897516	-1.7239
XLOC_013588	-6.80639	14.4829	-3.21515	0.0030763	0.0897663	-1.72639
TMEM184B	840.124	3606.15	3.21472	0.00307976	0.0897663	-1.72726
CKLF	1847.55	7485.61	3.21463	0.00308045	0.0897663	-1.72743
RAB10	658.871	4624.12	3.2146	0.0030807	0.0897663	-1.7275
STAU2	27.7062	235.388	3.21457	0.00308092	0.0897663	-1.72755
LRRC4	308.156	714.46	3.21357	0.00308891	0.0899175	-1.72956
DDI2	-8.79669	32.6452	-3.21149	0.00310559	0.0903212	-1.73373
XLOC_000101	-24.4864	71.6221	-3.2097	0.0031201	0.090661	-1.73734
CCDC152	-18.3596	38.7169	-3.20874	0.00312786	0.0907776	-1.73926
SNORA21	187.904	778.928	3.20829	0.00313146	0.0907776	-1.74015
XLOC_l2_006574	-27.8855	110.456	-3.20812	0.00313284	0.0907776	-1.74049
PIK3IP1	-107.957	398.57	-3.2078	0.00313543	0.0907776	-1.74113
EHD1	2931.42	19027.1	3.20724	0.00314001	0.0908281	-1.74226
XLOC_005464	21.2792	96.2263	3.20685	0.00314323	0.0908393	-1.74306
ENOSF1	-97.4606	328.886	-3.20601	0.00315004	0.0909542	-1.74473
NUP160	-111.614	574.869	-3.20523	0.00315645	0.0910573	-1.74631
S100A4	10504.7	66601.3	3.20361	0.00316972	0.0913014	-1.74956
MFF	301.163	2804.78	3.2035	0.0031706	0.0913014	-1.74977
XLOC_012079	-11.1024	30.9125	-3.20216	0.00318162	0.0915364	-1.75246
FLJ20021	101.618	530.586	3.20165	0.00318581	0.0915749	-1.75348
SOX8	-34.6746	129.971	-3.20066	0.00319398	0.0916476	-1.75546
RXRA	2694.49	13709.2	3.20065	0.00319405	0.0916476	-1.75548
THOC7	230.346	1719.27	3.20011	0.00319855	0.0916947	-1.75657
C8orf33	-17.2509	73.4166	-3.19964	0.0032024	0.0917229	-1.7575
PTBP3	584.628	3739.85	3.19915	0.00320646	0.0917573	-1.75848
DKFZp547G183	-83.3643	321.562	-3.19873	0.00320998	0.0917762	-1.75933
MGC70870	72.249	376.482	3.19668	0.00322703	0.0921816	-1.76343
IRF3	-221.394	1107.07	-3.19607	0.00323214	0.0922188	-1.76466
PLD6	-79.8123	238.596	-3.19526	0.00323891	0.0922188	-1.76628
GTF2I	1129.94	5594.87	3.19525	0.00323898	0.0922188	-1.7663
PYDC1	290.539	1570.33	3.19515	0.00323983	0.0922188	-1.7665
XLOC_009217	-3.44748	7.54677	-3.1946	0.0032445	0.0922698	-1.76761
C18orf45	-7.47922	21.0167	-3.19355	0.0032533	0.092417	-1.76971
IRF4	-68.2073	182.735	-3.19305	0.00325752	0.092417	-1.77071
KIAA1033	406.165	2640.03	3.19278	0.00325975	0.092417	-1.77124
WDR82	356.497	3231.63	3.19236	0.00326336	0.092417	-1.7721
CAMK4	-44.6098	135.583	-3.19213	0.00326525	0.092417	-1.77255
XLOC_l2_007033	-4.85351	8.15002	-3.19182	0.00326788	0.092417	-1.77317
DYRK1A	41.8608	534.526	3.19117	0.00327342	0.092417	-1.77449
MLL	-126.863	531.265	-3.19083	0.00327625	0.092417	-1.77515
Q16594	-8.17965	24.3779	-3.19071	0.00327728	0.092417	-1.7754
ZNF584	-24.326	81.05	-3.19057	0.00327848	0.092417	-1.77568
SPOPL	250.864	1212.42	3.1878	0.003302	0.0928754	-1.78122
XLOC_005238	-6.0914	9.86675	-3.18734	0.00330595	0.0928754	-1.78214
NOL9	-52.5936	220.621	-3.18717	0.00330739	0.0928754	-1.78248
C17orf6	-2.39916	4.03122	-3.18706	0.00330833	0.0928754	-1.7827
PIM3	2541.89	10856.8	3.18695	0.00330933	0.0928754	-1.78293
MOSPD2	457.432	1546.9	3.18662	0.00331212	0.0928754	-1.78358
MYEOV2	490.778	3307.86	3.18565	0.00332041	0.0929847	-1.78552
LOC100653004	-150.334	391.571	-3.18549	0.00332181	0.0929847	-1.78585
SMG6	-31.9345	166.587	-3.18436	0.00333152	0.0931072	-1.78811
USP4	1741.25	9247.68	3.1843	0.003332	0.0931072	-1.78822
MMP15	-10.9808	51.2	-3.18223	0.00334986	0.093525	-1.79236
PAGE2	-14.4325	21.7357	-3.18187	0.00335304	0.0935324	-1.79309
PKN2	107.96	593.415	3.17987	0.00337035	0.0939028	-1.79708
GPM6A	-4.8758	6.10429	-3.17966	0.00337218	0.0939028	-1.7975
FAM203A	-97.8562	472.639	-3.17881	0.00337961	0.0939764	-1.7992
LOC100233209	-189.002	731.767	-3.17818	0.0033851	0.0939764	-1.80046
MORF4L1	1135.61	9231.66	3.17815	0.00338537	0.0939764	-1.80052
PFKFB1	-2.00544	4.66353	-3.17778	0.00338859	0.0939764	-1.80126
RSRC1	47.5524	262.909	3.17768	0.00338947	0.0939764	-1.80146
LOC100289186	17.1246	93.4085	3.17701	0.0033954	0.0939851	-1.80281
KDELR2	312.382	1034.19	3.17687	0.00339661	0.0939851	-1.80308
DPH3P1	133.539	561.401	3.17664	0.00339857	0.0939851	-1.80353
CENPW	35.008	144.245	3.17623	0.00340221	0.0940048	-1.80436
SH3BP5L	383.383	1527.17	3.17583	0.00340569	0.0940199	-1.80515
TRAF4	-29.9872	101.328	-3.17532	0.00341018	0.094063	-1.80617
C1orf124	13.581	131.612	3.17435	0.00341878	0.0942191	-1.80812
C14orf126	-28.3918	123.133	-3.17309	0.00342987	0.0944437	-1.81063
TRIP4	187.688	1369.6	3.1714	0.00344487	0.0947674	-1.81401
LBH	-161.54	519.108	-3.1711	0.00344754	0.0947674	-1.81461
SNORD26	1843.34	8458.5	3.17071	0.00345101	0.0947816	-1.81539
CD6	-1378.91	4284.28	-3.17026	0.00345501	0.094783	-1.81628
LOC254100	-14.5131	44.3312	-3.17004	0.00345697	0.094783	-1.81672
C9orf72	63.5874	276.992	3.16861	0.00346976	0.0950524	-1.81958
TRPC6	223.17	1157.24	3.16815	0.00347391	0.0950849	-1.8205
ENO1-AS1	-15.2699	45.7442	-3.16638	0.00348979	0.0953584	-1.82403
XLOC_007942	-8.50713	26.6665	-3.16637	0.00348985	0.0953584	-1.82405
OAZ1	20308.7	184180	3.16593	0.00349387	0.0953871	-1.82494
FADD	1481.64	5880.15	3.16538	0.00349879	0.0954402	-1.82603
STX4	348.582	3219.9	3.1642	0.00350944	0.0956493	-1.82838
CNTNAP1	-22.5986	53.2187	-3.16272	0.00352287	0.0959338	-1.83134
ZNF746	1056.13	5407.98	3.16179	0.00353133	0.0960828	-1.8332
BID	2836.49	13829.9	3.16096	0.00353888	0.0961024	-1.83485
RAB37	735.868	4934.8	3.16078	0.00354051	0.0961024	-1.83521
GPR183	-654.497	2010.89	-3.16072	0.00354104	0.0961024	-1.83532
LOC100129960	289.058	1040.76	3.15966	0.00355079	0.096194	-1.83745
SPAG9	151.398	769.404	3.15961	0.00355124	0.096194	-1.83755
MAP3K9	-10.8413	39.2608	-3.15937	0.00355341	0.096194	-1.83802
ZMYND8	-84.9244	720.573	-3.15804	0.0035656	0.0963948	-1.84067
LOC100505932	43.8975	180.368	3.15791	0.00356684	0.0963948	-1.84094
FIZ1	-25.5796	73.196	-3.1547	0.0035964	0.0971119	-1.84733
LOC731789	-3.32947	13.2517	-3.15421	0.00360097	0.0971536	-1.84831
SCRN3	14.3612	119.324	3.15312	0.00361105	0.0973341	-1.85047
XLOC_011054	-2.99069	4.4294	-3.15283	0.00361373	0.0973341	-1.85105
FRY	80.2266	349.948	3.15165	0.00362473	0.0974951	-1.8534
HEATR2	-19.3352	107.229	-3.15154	0.00362579	0.0974951	-1.85362
PTGER4	814.666	4165.71	3.15047	0.00363581	0.097635	-1.85576
ZNF117	81.3724	295.585	3.15033	0.00363708	0.097635	-1.85603
LOC284379	43.7154	341.842	3.14992	0.0036409	0.0976559	-1.85684
ATG12	93.0914	682.023	3.14829	0.00365623	0.0979851	-1.86009
ANAPC13	185.529	912.928	3.14691	0.00366921	0.0981761	-1.86284
EIF2C4	301.154	1246.3	3.14689	0.00366948	0.0981761	-1.86289
LOC440149	109.146	412.976	3.14577	0.00368003	0.0983005	-1.86512
ZNF217	428.416	2602.19	3.14575	0.00368026	0.0983005	-1.86516
CARD16	2505.19	9679.13	3.14427	0.00369422	0.0985746	-1.86809
C7orf60	28.9875	184.774	3.14399	0.00369692	0.0985746	-1.86866
OGFRL1	1100.91	3985.96	3.14328	0.00370364	0.0985746	-1.87006
FAM153A	-54.2825	118.189	-3.14326	0.00370389	0.0985746	-1.87012
TTN	-14.9869	36.7725	-3.14238	0.0037122	0.0985746	-1.87185
BLVRA	2446.66	7362.43	3.14196	0.00371623	0.0985746	-1.87269
FAM172A	108.009	780.065	3.14172	0.00371858	0.0985746	-1.87318
CSTA	1102.11	4295.86	3.1416	0.00371966	0.0985746	-1.8734
LTA	-13.6983	53.1518	-3.1415	0.00372068	0.0985746	-1.87362
TSPAN18	-52.9116	164.492	-3.14144	0.00372124	0.0985746	-1.87373
LOC100506609	-3.19663	6.94696	-3.14033	0.00373187	0.0987745	-1.87594
SH3PXD2A	-57.9228	167.989	-3.13891	0.00374551	0.0990538	-1.87876
DBI	1809.54	13245.4	3.13818	0.00375253	0.0991576	-1.88021
PAFAH1B3	-61.0738	317.678	-3.13631	0.00377057	0.0995162	-1.88392
FXYD2	-27.8424	74.2982	-3.13614	0.0037723	0.0995162	-1.88428
LOC100505725	-7.45567	17.8616	-3.13493	0.00378402	0.0996477	-1.88668
PYGO2	-119.744	817.132	-3.13482	0.00378509	0.0996477	-1.8869
PPP2R4	-76.2793	462.679	-3.13466	0.00378661	0.0996477	-1.88721
HIPK1	454.105	2661.65	3.13329	0.00380001	0.0999184	-1.88994
XLOC_008855	-14.0021	54.4865	-3.13274	0.00380533	0.0999764	-1.89102
XLOC_004669	-6.8145	10.2921	-3.13216	0.00381098	0.100028	-1.89217
XLOC_012193	-5.97223	15.7767	-3.13188	0.00381379	0.100028	-1.89274
RIPK1	272.328	2121.58	3.13094	0.00382302	0.100028	-1.89461
CNTROB	-39.7778	208.638	-3.13092	0.00382314	0.100028	-1.89463
DSC1	-29.7182	43.3111	-3.1308	0.00382434	0.100028	-1.89488
BAG4	12.7605	99.2147	3.13055	0.00382678	0.100028	-1.89537
TBC1D4	-72.7971	221.992	-3.13031	0.00382913	0.100028	-1.89585
DRG2	-160.446	873.802	-3.12915	0.00384056	0.100245	-1.89815
RAI2	12.8699	39.2882	3.1287	0.00384504	0.10028	-1.89905
HCLS1	12886.9	65897.4	3.12779	0.00385399	0.100355	-1.90085
LOC100272216	-20.9842	72.3687	-3.12735	0.0038584	0.100355	-1.90174
GLIPR1	95.8166	604.713	3.12723	0.00385956	0.100355	-1.90197
IFFO1	573.124	3988.39	3.12704	0.00386144	0.100355	-1.90235
TBC1D3P5	169.272	949.606	3.12683	0.00386354	0.100355	-1.90277
ARNTL	138.798	997.669	3.12648	0.00386696	0.100363	-1.90345
LOC100506054	-10.9932	38.0711	-3.12549	0.00387687	0.100538	-1.90543
BICD2	425.06	2294.44	3.12362	0.00389548	0.100866	-1.90914
ANKRD34B	24.6304	58.1715	3.12359	0.00389577	0.100866	-1.90919
C14orf129	241.394	1330.8	3.12239	0.00390782	0.101043	-1.91158
GPD2	43.0945	199.308	3.12206	0.00391107	0.101043	-1.91223
RAB35	498.564	3161.06	3.12196	0.00391207	0.101043	-1.91242
ROMO1	804.361	6013.59	3.12142	0.00391756	0.101103	-1.91351
LOC100129216	-12.3543	13.2194	-3.1208	0.00392379	0.101183	-1.91474
LOC100652768	-4.77699	20.6945	-3.11975	0.00393431	0.101342	-1.91681
NAA50	378.433	2907.94	3.11956	0.00393627	0.101342	-1.91719
HMOX1	1722.75	7311.39	3.11755	0.00395658	0.101712	-1.92117
EPB41	-27.7274	118.788	-3.11751	0.003957	0.101712	-1.92126
LMO2	3002.24	10542.3	3.11478	0.0039848	0.102345	-1.92667
GMFG	20146.4	113849	3.11365	0.00399636	0.102559	-1.92891
SF3A2	-252.467	1933.23	-3.11302	0.00400284	0.102644	-1.93017
TSHZ2	-26.7674	64.3508	-3.11239	0.00400931	0.102727	-1.93142
ARSA	3398.11	17297.3	3.11134	0.00402012	0.102911	-1.9335
UBE2J1	200.085	881.244	3.11044	0.00402933	0.102911	-1.93527
VAMP7	193.084	1687.67	3.11034	0.0040304	0.102911	-1.93547
DENND1A	31.3028	174.77	3.11019	0.00403198	0.102911	-1.93578
ARL6IP6	184.044	1012.14	3.11014	0.0040325	0.102911	-1.93588
PTTG1IP	662.827	4194.99	3.10964	0.00403758	0.102958	-1.93685
FOXJ1	-4.07405	10.084	-3.10883	0.00404601	0.103091	-1.93846
SNORA73A	148.694	687.536	3.10823	0.00405224	0.103136	-1.93965
ACOT13	219.126	1208.36	3.10804	0.00405421	0.103136	-1.94003
SCAF1	-41.1764	219.915	-3.10561	0.0040795	0.103632	-1.94484
RAB2B	-26.7445	150.959	-3.10555	0.00408016	0.103632	-1.94496
ZNF76	-26.0849	110.865	-3.10441	0.00409205	0.103776	-1.94721
XLOC_l2_005781	-7.54125	22.5002	-3.10438	0.00409231	0.103776	-1.94726
HDAC4	231.018	1303.58	3.10229	0.00411432	0.104252	-1.95141
XLOC_l2_008226	-3.3164	9.30785	-3.10157	0.00412186	0.104281	-1.95283
SNX18	202.426	820.151	3.10157	0.00412194	0.104281	-1.95284
CACNA1I	-36.7523	97.8685	-3.10105	0.00412741	0.104304	-1.95387
COTL1	6150.55	34372.1	3.10086	0.00412939	0.104304	-1.95424
XLOC_013282	-28.7521	150.745	-3.10038	0.00413451	0.104352	-1.9552
CASP4	7084.36	34425.4	3.09867	0.00415254	0.104661	-1.95856
PIGL	-34.6011	115.343	-3.0986	0.0041533	0.104661	-1.9587
PPIP5K1	-5.68902	19.5752	-3.09767	0.00416319	0.104828	-1.96054
GPRASP1	-106.782	295.573	-3.09674	0.00417309	0.104927	-1.96238
MAX	487.948	4360.73	3.09647	0.00417605	0.104927	-1.96293
NEIL1	-174.821	571.577	-3.09638	0.00417692	0.104927	-1.96309
ZNF549	-17.5425	47.5784	-3.09531	0.00418844	0.105082	-1.96522
COPS5	367.331	3330.6	3.0952	0.00418964	0.105082	-1.96544
XLOC_013494	-3.66043	6.47772	-3.09439	0.00419823	0.105215	-1.96702
MZB1	-237.879	392.867	-3.09305	0.00421265	0.105454	-1.96967
SLC22A25	-2.26517	4.99106	-3.09289	0.00421436	0.105454	-1.96999
ZNF37BP	-50.1242	184.089	-3.0919	0.00422509	0.105598	-1.97195
LOC100130231	-32.7662	96.8239	-3.09118	0.00423292	0.105598	-1.97338
LOC100652866	-9.43965	14.3084	-3.09106	0.00423415	0.105598	-1.97361
AATK	914.497	2226.22	3.09106	0.00423417	0.105598	-1.97361
DKFZP761C1711	-1.70472	4.08434	-3.09046	0.00424069	0.105598	-1.9748
CCDC88B	1809.88	8927.82	3.08975	0.00424834	0.105598	-1.9762
PVT1	-19.8036	112.082	-3.08964	0.0042495	0.105598	-1.97641
HAPLN3	-581.707	1974.79	-3.08932	0.00425304	0.105598	-1.97705
MYBBP1A	-32.1215	133.553	-3.08919	0.00425447	0.105598	-1.97731
GSTT1	-72.1441	62.6971	-3.08903	0.00425615	0.105598	-1.97762
NEDD8	3359.39	26896.1	3.08902	0.00425631	0.105598	-1.97765
LOC100288432	68.3494	239.562	3.08849	0.00426203	0.105658	-1.97868
GADD45G	91.9459	282.675	3.08696	0.00427877	0.105991	-1.98171
PCTP	545.161	2068.51	3.08652	0.00428356	0.106028	-1.98258
FLJ11710	-53.4014	150.759	-3.08621	0.004287	0.106031	-1.9832
PYCARD	3494.66	21300.9	3.08434	0.00430748	0.106456	-1.98688
HEBP2	1587.33	6417.89	3.08129	0.00434116	0.107133	-1.99291
USH1C	-5.28001	8.27591	-3.0811	0.0043432	0.107133	-1.99327
HERC2P7	-26.4617	64.9849	-3.08071	0.00434752	0.107133	-1.99404
TNFAIP2	13176.6	70455.9	3.08065	0.00434826	0.107133	-1.99417
PGD	1634.07	5006.83	3.0798	0.0043577	0.107215	-1.99585
GGT7	-15.0854	58.9862	-3.07975	0.00435826	0.107215	-1.99595
RING1	-93.374	642.884	-3.07909	0.00436554	0.107312	-1.99724
XLOC_011765	-17.0536	59.4446	-3.07876	0.00436929	0.107322	-1.9979
CAPN14	-4.18278	6.93721	-3.07772	0.00438081	0.10735	-1.99994
XLOC_l2_010636	157.709	1490.95	3.07749	0.00438345	0.10735	-2.0004
XLOC_010555	-7.28046	8.35035	-3.07747	0.00438369	0.10735	-2.00044
XLOC_l2_013873	-14.5577	99.1536	-3.07737	0.00438481	0.10735	-2.00064
ARMC7	82.2674	735.039	3.07716	0.00438717	0.10735	-2.00106
DHRS7	734.407	3242.45	3.07608	0.00439917	0.107491	-2.00317
PQLC1	234.289	1161.21	3.07604	0.00439964	0.107491	-2.00325
LOC100506255	-16.3918	36.7914	-3.07558	0.00440479	0.107494	-2.00415
LOC100507254	-22.2851	24.9604	-3.07544	0.00440644	0.107494	-2.00444
LRMP	1316.91	6298.25	3.07513	0.00440993	0.107497	-2.00506
LOC282997	896.479	3445.7	3.07449	0.00441709	0.10759	-2.00631
FAM193B	-80.9664	419.331	-3.07376	0.00442527	0.107707	-2.00774
PSMA2	598.599	5172.55	3.07335	0.0044299	0.107738	-2.00855
HSPA1A	4687.23	18118.4	3.0713	0.00445311	0.108221	-2.01259
PLBD1	5174.6	17242.2	3.07068	0.00446023	0.108312	-2.01382
KIAA0284	-53.177	165.656	-3.06972	0.00447114	0.108408	-2.01571
VPS4B	516.396	4282.28	3.06968	0.00447155	0.108408	-2.01578
D2HGDH	-300.753	924.013	-3.06918	0.0044773	0.108408	-2.01678
STK3	57.9878	251.322	3.06914	0.00447771	0.108408	-2.01685
SLC25A3	2390.18	21630.1	3.06866	0.0044832	0.108459	-2.01779
CMTM3	1976.05	9960.78	3.06766	0.0044947	0.108577	-2.01977
ZIK1	-16.299	77.2843	-3.06764	0.00449486	0.108577	-2.0198
LOC100506268	93.8816	419.07	3.065	0.00452522	0.109172	-2.025
MTMR10	260.315	1398.41	3.06491	0.00452629	0.109172	-2.02519
MLLT6	-377.247	1442.39	-3.06438	0.00453232	0.109235	-2.02621
MCF2L	-7.95027	28.6624	-3.06348	0.00454278	0.109405	-2.028
ZDHHC19	-2.77009	6.38357	-3.06297	0.00454873	0.109466	-2.02901
PLD4	-53.2282	136.02	-3.06242	0.00455504	0.109536	-2.03008
MARCH9	-217.899	994.783	-3.06172	0.00456316	0.109611	-2.03145
SEC23A	90.8803	830.062	3.06126	0.00456852	0.109611	-2.03236
XIAP	121.69	1065.62	3.06079	0.00457402	0.109611	-2.03329
LOC100507131	-46.8103	179.844	-3.06066	0.00457551	0.109611	-2.03354
DMWD	-35.6629	138.23	-3.06059	0.00457633	0.109611	-2.03368
PUSL1	162.749	987.405	3.06011	0.00458187	0.109611	-2.03462
TLR9	-21.0058	96.7984	-3.0601	0.00458207	0.109611	-2.03465
UBXN2B	307.098	1304.84	3.0583	0.00460303	0.10985	-2.03818
SPAST	75.959	573.689	3.05777	0.00460929	0.10985	-2.03923
FBXO11	15.4208	188.044	3.05774	0.00460964	0.10985	-2.03929
HIST1H3I	84.469	397.93	3.05745	0.00461307	0.10985	-2.03986
NMNAT1	21.2956	130.868	3.05728	0.00461505	0.10985	-2.04019
P2RX5	-190.17	356.595	-3.05696	0.00461877	0.10985	-2.04082
ARL6IP5	657.727	4356.01	3.05673	0.00462147	0.10985	-2.04127
LOC388692	-42.2825	230.168	-3.05665	0.00462243	0.10985	-2.04143
MAP2K3	906.222	5366.86	3.05661	0.00462287	0.10985	-2.0415
C9orf23	898.211	5597.39	3.05503	0.00464154	0.110212	-2.04462
LOC100506855	-21.3938	85.0224	-3.05473	0.00464501	0.110213	-2.04519
MYO18A	-83.001	620.702	-3.05402	0.00465341	0.11033	-2.04659
XLOC_011568	-21.4732	100.434	-3.05185	0.00467922	0.11086	-2.05086
STX17	-35.5974	178.564	-3.05156	0.00468271	0.110861	-2.05144
PIP4K2C	-26.0283	191.613	-3.05076	0.00469221	0.111004	-2.05301
ASMTL-AS1	-25.5626	101.825	-3.05024	0.00469841	0.111069	-2.05403
AGAP3	145.181	784.108	3.04953	0.0047069	0.111187	-2.05542
CRIP3	-52.0983	81.0876	-3.04743	0.00473205	0.111653	-2.05954
STAMBPL1	-31.7715	105.988	-3.04718	0.00473505	0.111653	-2.06003
GSTM2P1	-9.10221	20.2395	-3.04698	0.00473746	0.111653	-2.06042
MGAT4B	384.967	2989.83	3.04673	0.00474052	0.111653	-2.06092
EHMT2	-66.0598	330.585	-3.04626	0.00474616	0.11166	-2.06184
XLOC_l2_015562	-14.7855	60.7777	-3.04609	0.00474828	0.11166	-2.06218
TMEM238	-1602.29	8255.1	-3.04569	0.00475304	0.11166	-2.06296
MYPOP	-10.563	63.3689	-3.04555	0.00475477	0.11166	-2.06324
ELK3	-14.835	83.2183	-3.04319	0.00478338	0.112207	-2.06787
FAR1	60.5851	362.251	3.04305	0.00478504	0.112207	-2.06814
TUBGCP4	-13.779	70.916	-3.04256	0.00479096	0.112253	-2.0691
TKT	11154.7	55258	3.04231	0.00479399	0.112253	-2.06959
XLOC_000044	-16.3255	50.8585	-3.04189	0.00479919	0.112293	-2.07042
ATP5J2	548.827	4769.53	3.04115	0.00480816	0.112421	-2.07186
FLJ27354	-17.4094	58.9471	-3.04028	0.00481879	0.112587	-2.07357
CHMP7	-98.1375	437.291	-3.03934	0.00483035	0.112775	-2.07542
ING2	76.8978	664.482	3.03625	0.00486833	0.113579	-2.08147
CD5	-829.738	2907.08	-3.03578	0.00487412	0.113631	-2.08239
DNAJC3	222.111	812.154	3.03534	0.00487962	0.113677	-2.08326
SDHB	272.443	2367.47	3.03481	0.00488613	0.113723	-2.08429
RASSF2	4355.3	17489.2	3.03461	0.00488867	0.113723	-2.08469
ATP5SL	229.224	1698.55	3.0338	0.00489874	0.113875	-2.08628
ARL15	7.449	43.7484	3.03321	0.00490601	0.113961	-2.08743
XLOC_013108	-13.7133	56.7255	-3.03261	0.00491354	0.113997	-2.08861
CTNNB1	111.528	1017.77	3.03217	0.00491895	0.113997	-2.08946
LOC100506694	-27.4839	135.407	-3.0321	0.00491984	0.113997	-2.0896
EBI3	-11.6185	25.3651	-3.03195	0.00492179	0.113997	-2.08991
GOLGA7	354.518	2292.13	3.03164	0.00492563	0.114004	-2.09051
XLOC_l2_005465	682.97	6561.09	3.03125	0.00493045	0.114033	-2.09127
CYHR1	126.635	722.718	3.02905	0.00495803	0.114588	-2.09557
MMP28	-20.3548	123.514	-3.02842	0.00496602	0.11469	-2.09682
PPP2R1A	-169.26	1125.2	-3.02772	0.00497488	0.114735	-2.09819
SNORD47	-44.2494	208.059	-3.0277	0.00497512	0.114735	-2.09823
FLJ30403	-15.3449	41.9992	-3.02714	0.00498218	0.114807	-2.09933
DOM3Z	-61.8132	364.948	-3.02689	0.00498537	0.114807	-2.09982
PAK2	271.095	1475.94	3.02549	0.00500303	0.115117	-2.10255
LOC283887	-7.70419	24.4506	-3.02526	0.005006	0.115117	-2.10301
UBAP1L	-92.2881	353.308	-3.02465	0.0050137	0.115211	-2.1042
GGA2	-179.207	744.527	-3.02344	0.00502912	0.115415	-2.10657
INPP5A	81.7201	351.934	3.02339	0.00502977	0.115415	-2.10667
LOC100652904	-2.81482	6.03341	-3.02304	0.00503412	0.115429	-2.10734
DDX11	-64.6962	141.322	-3.02277	0.00503756	0.115429	-2.10786
BACE1-AS	-14.0892	27.6353	-3.02181	0.00504993	0.115547	-2.10976
FXYD5	-240.636	1467.8	-3.02181	0.00504995	0.115547	-2.10976
SCARNA20	52.8943	182.434	3.02125	0.00505705	0.115627	-2.11085
PTPRE	488.739	2316.52	3.02083	0.00506242	0.115668	-2.11167
LAMTOR3	65.4928	349.33	3.02041	0.00506786	0.11571	-2.11249
LRRC41	-48.2735	235.039	-3.01964	0.00507766	0.115851	-2.11399
PLA2G6	-34.3196	202.112	-3.01811	0.00509742	0.116121	-2.11699
LOC401431	-36.4102	123.703	-3.01791	0.00510001	0.116121	-2.11738
C16orf58	-90.1264	435.949	-3.01788	0.00510034	0.116121	-2.11743
BANF1	-130.031	670.206	-3.01725	0.00510853	0.116224	-2.11867
TRPV1	-11.6933	58.6059	-3.01423	0.00514772	0.117033	-2.12457
LIME1	-173.307	773.521	-3.01373	0.00515422	0.117098	-2.12554
CD163	1099.81	3655.25	3.01296	0.00516423	0.117199	-2.12704
ANKRD18A	14.4902	46.984	3.01283	0.00516599	0.117199	-2.1273
FCGR3A	30096.7	142972	3.01247	0.00517074	0.117224	-2.12801
LOC728743	-135.077	522.016	-3.01216	0.00517477	0.117233	-2.12861
XLOC_010378	-4.29093	10.9294	-3.01154	0.00518291	0.117334	-2.12983
LILRB3	9806.72	40917	3.01089	0.0051914	0.117343	-2.13109
C7orf59	6748.7	34729	3.01059	0.00519531	0.117343	-2.13167
DERA	164.619	1152.53	3.00998	0.00520337	0.117343	-2.13287
COL5A3	-9.28957	10.9398	-3.00996	0.0052036	0.117343	-2.1329
EXOC3	95.8057	566.504	3.00969	0.00520715	0.117343	-2.13343
XLOC_010291	-6.55056	24.9471	-3.00934	0.00521182	0.117343	-2.13412
H3F3A	18309.2	154633	3.00915	0.0052143	0.117343	-2.13449
ITPR3	-152.815	554.056	-3.0091	0.00521501	0.117343	-2.13459
XLOC_l2_007147	-21.5516	51.3327	-3.00887	0.00521795	0.117343	-2.13503
HIST1H2AB	26.5469	152.861	3.00824	0.00522634	0.117343	-2.13627
STK10	989.612	9417.01	3.00776	0.00523271	0.117343	-2.13721
PELO	410.75	1896.82	3.00761	0.00523471	0.117343	-2.1375
B2M	18635.4	176538	3.00735	0.00523811	0.117343	-2.13801
IL32	-1937.82	5580.82	-3.00718	0.00524037	0.117343	-2.13834
SLC50A1	-29.5481	226.897	-3.0071	0.00524139	0.117343	-2.13849
NFYC	149.991	1065.98	3.00707	0.00524181	0.117343	-2.13855
C17orf82	22.1588	89.1996	3.00657	0.00524845	0.117409	-2.13953
LOC100652772	-20.7538	76.3462	-3.00586	0.00525785	0.117538	-2.14091
XLOC_010811	11.467	55.6385	3.0051	0.00526794	0.117681	-2.14239
VPS41	77.3672	426.528	3.0047	0.00527329	0.117719	-2.14317
C20orf72	245.64	2001.11	3.00386	0.00528447	0.117886	-2.14481
LPAR5	-46.8006	135.708	-3.00243	0.0053036	0.118059	-2.1476
FOXI2	3021.21	21205.6	3.00216	0.0053073	0.118059	-2.14814
METRNL	1091.07	6355.82	3.00175	0.00531275	0.118059	-2.14893
MCFD2	20.235	173.3	3.00173	0.00531307	0.118059	-2.14897
GNG8	-23.1854	81.2391	-3.00167	0.00531376	0.118059	-2.14908
LOC100288615	610.962	3480.56	3.00163	0.00531429	0.118059	-2.14915
ESYT1	-239.559	1151.26	-3.00121	0.00532001	0.118085	-2.14998
LOC728537	-12.7366	48.636	-3.00094	0.00532365	0.118085	-2.15051
WAPAL	147.835	1457.6	3.00065	0.0053275	0.118085	-2.15107
FLJ38717	-178.499	758.244	-3.00009	0.00533502	0.118085	-2.15216
ZNF382	-9.90152	31.5694	-2.99992	0.00533732	0.118085	-2.15249
RNF138	156.498	1003.75	2.99991	0.00533754	0.118085	-2.15252
AGAP11	-15.479	63.2223	-2.99899	0.00534989	0.118277	-2.15431
SNTB1	47.7172	254.822	2.99797	0.0053637	0.118421	-2.1563
LOC645676	-20.6773	196.315	-2.99796	0.0053638	0.118421	-2.15631
ELMOD2	81.6228	626.844	2.99637	0.00538538	0.118815	-2.15941
CALML5	-18.2501	31.6902	-2.9957	0.00539446	0.118934	-2.16071
LOC100507161	-23.9821	63.1965	-2.99481	0.00540669	0.119122	-2.16246
SPATA2L	172.073	1151.25	2.9938	0.00542045	0.119294	-2.16442
IGFL1	-4.40264	10.2163	-2.99369	0.00542196	0.119294	-2.16463
CD44	1737.07	12008.8	2.99314	0.00542943	0.119377	-2.1657
C16orf54	3147.91	19106.4	2.99216	0.00544289	0.119407	-2.16761
PAGE2B	-11.5157	24.3396	-2.99177	0.00544828	0.119407	-2.16837
DSCR3	54.446	600.279	2.99177	0.00544829	0.119407	-2.16837
CAB39	244.364	1502.5	2.99159	0.00545071	0.119407	-2.16872
KAT2A	-291.196	1333.75	-2.99151	0.0054519	0.119407	-2.16888
LGI2	-1.84955	3.96016	-2.9913	0.00545477	0.119407	-2.16929
CX3CR1	6395.09	20992	2.9911	0.00545751	0.119407	-2.16968
METTL17	-116.055	609.15	-2.99088	0.00546057	0.119407	-2.17011
XLOC_007538	2.5285	7.83673	2.99011	0.00547118	0.119557	-2.17161
LOC400958	51.6255	214.789	2.98897	0.00548693	0.11982	-2.17383
TAF10	863.37	8012.8	2.98869	0.00549079	0.119823	-2.17437
MUSTN1	-28.7689	150.703	-2.9871	0.00551284	0.120088	-2.17746
MIEN1	769.488	6840.87	2.98703	0.00551377	0.120088	-2.17759
YME1L1	154.571	1303.61	2.987	0.00551417	0.120088	-2.17765
GMCL1	65.374	365.571	2.98568	0.00553262	0.120408	-2.18023
AMD1	844.423	4303.85	2.98443	0.00555	0.120704	-2.18265
RAPGEF2	275.018	1386.69	2.98353	0.00556264	0.120897	-2.1844
GLRX	3444.88	15591.3	2.98049	0.00560544	0.121745	-2.19032
TNKS	-19.3182	99.7485	-2.98021	0.00560936	0.121746	-2.19086
YPEL5	1640.19	8214.07	2.97963	0.00561766	0.121746	-2.192
SLC4A11	-3.90099	22.4237	-2.97934	0.00562176	0.121746	-2.19256
LOC401847	-36.3886	72.2748	-2.97891	0.00562784	0.121746	-2.19339
ACVR1C	-12.8174	29.1817	-2.97873	0.00563034	0.121746	-2.19374
LOC100130442	-21.198	69.8362	-2.97851	0.00563343	0.121746	-2.19416
LBR	4450.59	18499.8	2.97807	0.00563969	0.121746	-2.19501
FXR1	233.683	2173.15	2.978	0.00564076	0.121746	-2.19516
SEMG1	8.79326	21.2796	2.97755	0.00564714	0.121746	-2.19603
USP13	-14.1183	58.0547	-2.97745	0.00564849	0.121746	-2.19622
C10orf35	-43.5528	140.885	-2.9773	0.00565066	0.121746	-2.19651
NFKB2	-89.7621	417.538	-2.97727	0.00565102	0.121746	-2.19656
SCAF4	-29.9277	225.078	-2.97615	0.00566701	0.121905	-2.19874
KCTD7	-9.39523	29.8612	-2.97596	0.00566974	0.121905	-2.19912
CAPN3	-57.0202	290.331	-2.97573	0.00567307	0.121905	-2.19957
F5	90.918	221.939	2.97569	0.00567361	0.121905	-2.19964
UTS2	906.986	1371.2	2.97538	0.00567805	0.121919	-2.20025
ITGAM	1522.59	6031.97	2.97471	0.00568764	0.122043	-2.20155
LOC100287633	-23.9799	154.627	-2.9737	0.00570209	0.12221	-2.2035
CTBP1	-86.1763	565.256	-2.97334	0.00570729	0.12221	-2.20421
MFAP1	137.56	1286.61	2.97317	0.00570977	0.12221	-2.20454
NAT1	98.001	553.97	2.97304	0.00571162	0.12221	-2.20479
COX5B	910.259	8595.98	2.97284	0.00571447	0.12221	-2.20518
STK40	6343.65	33975.7	2.97193	0.00572754	0.122408	-2.20694
SEPN1	-40.9072	179.539	-2.97133	0.00573613	0.122509	-2.2081
XLOC_008372	-28.2048	54.1134	-2.97103	0.00574054	0.122509	-2.20869
IL10	7.6199	15.4352	2.97054	0.00574768	0.122509	-2.20965
DKFZP586B0319	-14.1782	40.3164	-2.97052	0.00574786	0.122509	-2.20967
LOC220729	-109.38	648.146	-2.96983	0.00575781	0.122509	-2.21101
XLOC_004827	-8.04723	26.0179	-2.9695	0.00576262	0.122509	-2.21165
SNORA53	-6.59742	12.0451	-2.96941	0.00576399	0.122509	-2.21183
LOC100147773	-15.2388	28.1415	-2.96926	0.00576618	0.122509	-2.21213
TMCC1	439.997	1812.17	2.96922	0.00576667	0.122509	-2.21219
FLJ45340	-262.881	1138.08	-2.96854	0.00577662	0.122568	-2.21352
UIMC1	755.404	3956.39	2.96845	0.00577797	0.122568	-2.2137
C1orf56	594.99	4969.33	2.96813	0.00578249	0.122568	-2.2143
MB21D1	92.2721	536.959	2.96765	0.00578952	0.122568	-2.21524
TPM2	-201.629	600.25	-2.96739	0.00579327	0.122568	-2.21574
ADRM1	-108.358	898.593	-2.96735	0.00579388	0.122568	-2.21582
CTNNBIP1	136.78	1000.35	2.9672	0.00579617	0.122568	-2.21613
RFFL	519.155	3283.02	2.96651	0.00580612	0.122697	-2.21745
SNORA45	-18.7926	87.5286	-2.96594	0.00581454	0.122794	-2.21857
LSM3	239.109	2129.25	2.96562	0.00581914	0.122811	-2.21918
DDIT3	112.425	505.7	2.96495	0.00582897	0.1229	-2.22048
ANXA7	261.53	2077.05	2.96481	0.00583101	0.1229	-2.22075
PPAN	-22.1972	129.106	-2.96431	0.00583837	0.122974	-2.22172
LILRB4	177.092	544.711	2.96368	0.00584764	0.123044	-2.22295
NOP2	-81.7842	406.462	-2.96337	0.00585218	0.123044	-2.22355
SYAP1	87.8352	668.374	2.9633	0.00585322	0.123044	-2.22368
DPM1	380.681	2770.62	2.96201	0.00587218	0.123362	-2.22618
KIAA1432	32.8718	276.142	2.96097	0.0058875	0.123603	-2.22819
BET1L	-29.2748	211.719	-2.95937	0.00591126	0.12402	-2.23129
XLOC_008966	-5.47313	36.2298	-2.95908	0.00591557	0.12403	-2.23185
MTMR4	290.998	2851.58	2.95755	0.00593837	0.124426	-2.23482
XLOC_011183	-7.51735	21.564	-2.95707	0.00594554	0.124495	-2.23575
CAST	757.533	4116.28	2.955	0.00597647	0.125061	-2.23975
USF2	737.851	8429.13	2.95355	0.00599827	0.125436	-2.24256
PRR22	-9.43617	26.7319	-2.94991	0.00605336	0.1265	-2.24961
SAR1A	187.922	1835.53	2.94966	0.00605706	0.1265	-2.25008
XLOC_l2_001064	8.06825	36.4595	2.94927	0.00606308	0.126502	-2.25085
UBC	10345.8	120199	2.94907	0.00606612	0.126502	-2.25123
C17orf88	-19.386	40.4402	-2.94888	0.00606897	0.126502	-2.2516
XLOC_l2_006704	-2.34448	5.21621	-2.94836	0.00607691	0.126585	-2.25261
RRP36	386.356	3242.87	2.94781	0.00608533	0.126678	-2.25367
CCDC97	445.085	4786.18	2.94719	0.00609478	0.126694	-2.25487
AFAP1L2	-12.2246	49.592	-2.94568	0.00611787	0.126694	-2.25778
XKR8	2051.17	10054.6	2.94561	0.006119	0.126694	-2.25793
PLA2G15	391.787	1796.18	2.94549	0.00612082	0.126694	-2.25815
RNU105A	200.97	1109.56	2.94526	0.00612432	0.126694	-2.2586
NOL12	242.259	2140.49	2.94524	0.00612464	0.126694	-2.25864
RNF38	122.319	1185	2.94521	0.00612503	0.126694	-2.25869
XLOC_000811	-6.75433	15.7544	-2.94521	0.00612503	0.126694	-2.25869
ATP5L	5389.08	52684.6	2.94519	0.00612545	0.126694	-2.25874
PMAIP1	215.824	923.242	2.94502	0.00612795	0.126694	-2.25905
ADD3	702.368	5233.34	2.94492	0.0061295	0.126694	-2.25925
IFNGR1	1902.94	8995.43	2.94452	0.00613566	0.126739	-2.26002
PALLD	56.7971	145.482	2.94375	0.0061475	0.126902	-2.26151
SLC38A5	-56.1383	196.827	-2.9428	0.0061622	0.127124	-2.26335
PSMA4	494.112	3414.91	2.94195	0.00617536	0.127199	-2.26499
AP2B1	-66.9272	337.56	-2.9419	0.00617606	0.127199	-2.26508
VAMP3	178.912	1329.06	2.94179	0.00617775	0.127199	-2.26529
ASH2L	107.566	1035.94	2.94147	0.00618273	0.12722	-2.26591
CCDC50	-71.8817	291.072	-2.94075	0.00619401	0.127302	-2.26732
OR2A9P	-23.0951	60.7919	-2.9407	0.00619466	0.127302	-2.2674
NAT6	-32.8439	148.647	-2.94038	0.00619971	0.127324	-2.26803
TANK	285.645	2001.5	2.93964	0.00621123	0.127443	-2.26946
BRD4	86.1584	869.936	2.93845	0.00622966	0.127443	-2.27174
ENTPD2	76.3233	159.027	2.93828	0.00623231	0.127443	-2.27207
HIST1H3C	3921.92	20043.7	2.93825	0.00623286	0.127443	-2.27214
MARCKS	3805.64	11749.5	2.93822	0.00623331	0.127443	-2.27219
LOC100132247	-9028.98	53142.8	-2.93814	0.00623464	0.127443	-2.27236
TOX4	246.981	2376.72	2.9381	0.00623515	0.127443	-2.27242
EML3	-59.1799	388.739	-2.93797	0.00623729	0.127443	-2.27269
FAM120A	171.824	1167.32	2.93754	0.0062439	0.127497	-2.2735
Q5A5F0	-9.85035	30.9026	-2.93714	0.00625019	0.127544	-2.27428
MARS	147.243	1392.82	2.93663	0.00625825	0.127628	-2.27527
LOC100129461	-5.41289	18.1978	-2.93613	0.00626601	0.12766	-2.27623
STAG3	-123.221	564.418	-2.93557	0.00627489	0.12766	-2.27732
SCNM1	1145.71	7340.27	2.93551	0.00627576	0.12766	-2.27743
OGG1	-61.9294	380.18	-2.93539	0.0062777	0.12766	-2.27766
LILRA6	962.688	3124.8	2.93492	0.00628504	0.12766	-2.27856
XLOC_013674	-1.64598	4.33211	-2.93483	0.00628643	0.12766	-2.27874
TNFRSF19	-12.8921	30.3087	-2.93453	0.00629109	0.12766	-2.27931
GCA	14474.2	51579.4	2.93446	0.00629234	0.12766	-2.27946
BBIP1	93.0941	579.441	2.93425	0.00629565	0.12766	-2.27987
XPO4	-23.5465	100.964	-2.93281	0.00631826	0.127978	-2.28263
CCNDBP1	377.994	2334.81	2.93275	0.0063193	0.127978	-2.28276
ABCC5	247.044	746.865	2.93241	0.00632467	0.128006	-2.28341
GUSBP2	-58.7836	228.146	-2.93215	0.00632873	0.128007	-2.2839
NR1H4	-4.19597	6.25695	-2.93178	0.00633458	0.128026	-2.28462
TLR4	1302.16	4417.68	2.93139	0.00634087	0.128026	-2.28538
NINJ1	12603	55088.4	2.93106	0.0063461	0.128026	-2.28602
SETD2	-42.6618	332.148	-2.93071	0.00635161	0.128026	-2.28669
SLC6A9	-3.55352	6.87643	-2.93066	0.00635245	0.128026	-2.28679
ZAK	69.8018	304.416	2.93058	0.00635362	0.128026	-2.28693
LOC100505771	-332.563	2084.75	-2.92971	0.00636758	0.128075	-2.28862
SNHG13	-91.6556	441.5	-2.92955	0.00637007	0.128075	-2.28892
FKBP14	-14.9284	59.719	-2.92915	0.00637639	0.128075	-2.28969
ENO3	-101.428	478.838	-2.9288	0.00638199	0.128075	-2.29036
XLOC_012551	-7.1696	17.9931	-2.9285	0.00638687	0.128075	-2.29095
QSOX2	-48.7868	167.829	-2.92833	0.00638949	0.128075	-2.29127
AP3M2	-57.5057	234.188	-2.92806	0.00639384	0.128075	-2.29179
WIBG	-22.2419	141.843	-2.92782	0.0063977	0.128075	-2.29226
SLC9B2	-7.52311	19.0173	-2.92781	0.00639779	0.128075	-2.29227
CEACAM4	251.202	968.975	2.92773	0.0063991	0.128075	-2.29243
KRTAP4-8	-6.09475	22.878	-2.92768	0.00639994	0.128075	-2.29253
BPGM	109.024	799.599	2.92684	0.00641335	0.128235	-2.29414
TSHZ3	124.401	382.351	2.92668	0.00641596	0.128235	-2.29445
KRI1	-487.957	2322.34	-2.92493	0.00644408	0.128717	-2.29782
CYFIP2	-207.335	1110.22	-2.92383	0.00646184	0.128951	-2.29994
XLOC_005214	-15.4923	32.0811	-2.92371	0.00646381	0.128951	-2.30018
LOC100653024	-4.80932	11.0033	-2.92322	0.00647164	0.129027	-2.30111
SYVN1	-261.719	1669.96	-2.92204	0.00649073	0.129244	-2.30338
ZEB2	164.609	1032.88	2.92204	0.00649075	0.129244	-2.30338
CXorf57	-36.3674	124.122	-2.92167	0.00649677	0.129244	-2.3041
PLEKHG4	-51.6801	186.726	-2.92156	0.00649864	0.129244	-2.30432
C6orf211	65.2155	512.135	2.92097	0.00650821	0.129306	-2.30546
PAK1	699.616	3137.93	2.92087	0.00650984	0.129306	-2.30565
MST4	472.943	3171.35	2.92022	0.00652039	0.129435	-2.3069
FRAT1	519.638	1890.43	2.9196	0.00653056	0.129557	-2.3081
MED11	152.733	1236.34	2.91927	0.00653593	0.129584	-2.30873
SIDT1	-107.361	398.609	-2.91877	0.00654409	0.129587	-2.30969
OSBPL11	307.837	1881.89	2.91876	0.00654417	0.129587	-2.3097
CTU2	-16.3594	93.4185	-2.91751	0.00656462	0.129912	-2.3121
KRT18P55	-12.0872	73.2735	-2.91726	0.00656877	0.129914	-2.31259
SURF4	68.0046	514.16	2.91664	0.006579	0.130036	-2.31379
EDEM3	104.582	760.502	2.91626	0.0065852	0.130078	-2.31452
VPS26A	151.09	1105.62	2.91548	0.00659808	0.130252	-2.31602
TM7SF2	-12.8316	59.6068	-2.9152	0.00660268	0.130263	-2.31656
UBL5	2932.46	21772	2.9143	0.00661747	0.130427	-2.31828
PTEN	460.421	2092.69	2.91395	0.00662322	0.130427	-2.31895
SPIN3	-8.0784	29.1342	-2.91376	0.00662635	0.130427	-2.31931
XLOC_l2_008140	-6.36408	22.1945	-2.91371	0.00662728	0.130427	-2.31942
MPZL2	137.762	403.713	2.9134	0.0066324	0.130448	-2.32002
RALB	2422.92	11101.3	2.91298	0.00663929	0.130467	-2.32082
LOC100653351	-1.8159	3.53525	-2.91285	0.00664152	0.130467	-2.32108
LRSAM1	-40.5675	258.366	-2.91202	0.00665519	0.130603	-2.32266
C7orf54	-12.9131	36.7716	-2.91194	0.00665657	0.130603	-2.32282
XLOC_012338	-10.8203	38.4786	-2.91121	0.00666865	0.130699	-2.32422
MAP3K2	183.123	768.529	2.91089	0.00667401	0.130699	-2.32484
RAB28	44.5052	352.368	2.91052	0.00668013	0.130699	-2.32554
TAF7	877.188	6193.38	2.91039	0.00668237	0.130699	-2.3258
FAT3	-77.5221	430.262	-2.9102	0.00668558	0.130699	-2.32617
ACTR3C	-3.80344	15.2664	-2.91018	0.00668591	0.130699	-2.32621
OSBPL2	333.414	1704.2	2.90977	0.00669263	0.130751	-2.32698
SLC25A45	-34.9992	192.643	-2.9094	0.00669889	0.130794	-2.3277
FAM200B	462.48	2154.41	2.90854	0.00671328	0.130889	-2.32936
FOPNL	265.545	1745.08	2.9085	0.00671389	0.130889	-2.32943
SNORD108	-13.9796	44.4873	-2.90837	0.00671605	0.130889	-2.32967
STK4	570.847	5308.38	2.90764	0.00672837	0.130963	-2.33108
CTAGE5	15.4396	140.984	2.90759	0.00672911	0.130963	-2.33117
SPNS2	97.9241	305.844	2.90742	0.00673205	0.130963	-2.3315
XLOC_011132	35.4549	159.885	2.90707	0.00673786	0.130996	-2.33217
CDC25B	-471.07	1541.26	-2.90621	0.00675241	0.131176	-2.33383
XLOC_014111	-5.62215	9.70043	-2.90604	0.00675529	0.131176	-2.33416
FLJ25917	-1.97867	3.98596	-2.90526	0.00676833	0.131279	-2.33565
EPHA4	-63.3991	195.314	-2.90524	0.00676875	0.131279	-2.33569
CRTC3	-56.4517	328.261	-2.90488	0.00677477	0.131316	-2.33638
C11orf61	-22.2959	79.13	-2.90451	0.00678108	0.131359	-2.33709
HK2	344.323	1235.36	2.90424	0.0067856	0.131367	-2.33761
SEC61B	918.605	8920.39	2.90366	0.0067954	0.131478	-2.33872
RAB27A	224.015	1412.12	2.90247	0.00681558	0.131719	-2.341
MED23	-13.1113	117.156	-2.90234	0.00681775	0.131719	-2.34125
SNORA74B	-12.9767	77.501	-2.9022	0.00682022	0.131719	-2.34153
TMC8	-606.971	2959.02	-2.90173	0.00682813	0.131793	-2.34242
TRAPPC3	63.8591	561.828	2.90058	0.00684776	0.132024	-2.34463
SLC25A25	86.0525	509.497	2.90053	0.00684856	0.132024	-2.34472
RFX3	-7.62066	46.0285	-2.90031	0.00685245	0.132024	-2.34516
LOC100130419	-5.38069	12.5189	-2.89929	0.00686986	0.132229	-2.34711
ORAI1	-286.719	1729.8	-2.89911	0.00687284	0.132229	-2.34745
NFE2L1	192.342	1892.35	2.89896	0.00687546	0.132229	-2.34774
ATXN2	-92.5553	732.056	-2.8973	0.00690395	0.132645	-2.35092
EIF4A3	442.901	4770.03	2.89722	0.00690536	0.132645	-2.35108
XLOC_012694	-51.0264	85.4495	-2.89533	0.00693798	0.133177	-2.35471
RNF145	135.972	915.623	2.89513	0.00694138	0.133177	-2.35509
IER5	1563.04	10220.5	2.89457	0.00695099	0.133177	-2.35615
RABL3	-14.9173	78.8598	-2.8945	0.00695224	0.133177	-2.35629
CD28	-86.9344	323.07	-2.89396	0.0069616	0.133177	-2.35733
KRTAP10-12	-33.4102	180.007	-2.89393	0.00696213	0.133177	-2.35739
FLJ27352	7.19529	16.1219	2.89382	0.006964	0.133177	-2.35759
CLTC-IT1	-41.3622	172.956	-2.8936	0.00696783	0.133177	-2.35802
S100A6	16000.1	79343.5	2.89345	0.00697041	0.133177	-2.3583
SNORA8	91.1957	569.842	2.89274	0.00698277	0.133271	-2.35967
C1orf51	-1.0641	3.1052	-2.89252	0.00698661	0.133271	-2.36009
SNORD11B	-10.3285	34.148	-2.89231	0.00699032	0.133271	-2.3605
SDHAP1	-89.2928	329.598	-2.89221	0.00699198	0.133271	-2.36068
CD99L2	219.393	1651.26	2.89144	0.00700533	0.133446	-2.36215
TMEM205	1175.86	7878.64	2.89109	0.00701151	0.133485	-2.36283
LOC158863	-38.6158	147.343	-2.88986	0.007033	0.133815	-2.36518
ATP6V1E1	106.639	741.918	2.88947	0.00703987	0.133866	-2.36594
CIR1	380.294	2197.19	2.88857	0.00705563	0.134086	-2.36766
KPNA4	211.31	1543.39	2.88787	0.00706783	0.134094	-2.36899
OXSR1	231.962	1807.07	2.8877	0.00707082	0.134094	-2.36931
CCDC84	-338.999	1673.54	-2.88727	0.00707837	0.134094	-2.37014
NIN	97.2074	672.02	2.88709	0.00708168	0.134094	-2.37049
RWDD2B	-26.8939	81.3242	-2.88663	0.00708976	0.134094	-2.37137
SARDH	-21.0356	89.2967	-2.8862	0.00709724	0.134094	-2.37218
PRRT2	-35.7414	124.445	-2.88616	0.00709805	0.134094	-2.37227
NPDC1	-231.842	749.95	-2.88615	0.00709811	0.134094	-2.37228
UXS1	-99.5513	520.042	-2.88608	0.00709941	0.134094	-2.37242
GABBR1	-35.9804	156.258	-2.88586	0.00710331	0.134094	-2.37284
GRIPAP1	-84.4231	617.05	-2.88583	0.0071039	0.134094	-2.37291
FAM113B	-394.546	1471.55	-2.8857	0.00710619	0.134094	-2.37315
NCKIPSD	-10.1592	50.1585	-2.88501	0.00711826	0.134106	-2.37446
C15orf39	659.075	4192.99	2.88497	0.00711909	0.134106	-2.37455
SLC27A1	228.196	968.167	2.88482	0.00712176	0.134106	-2.37484
CDK19	1216.29	5124.97	2.8846	0.00712557	0.134106	-2.37525
LOC338799	-570.559	3098.01	-2.88417	0.00713326	0.134106	-2.37608
TOP3B	-22.4073	133.544	-2.88413	0.00713396	0.134106	-2.37616
GATS	115.482	517.766	2.88401	0.00713608	0.134106	-2.37639
XLOC_003878	-6.09855	13.1988	-2.8835	0.00714505	0.134115	-2.37735
XLOC_002377	-2.77399	5.28744	-2.88347	0.00714563	0.134115	-2.37741
LOC100129534	-19.441	82.156	-2.88327	0.00714911	0.134115	-2.37779
TMF1	38.7134	299.389	2.88302	0.00715364	0.134121	-2.37828
TRERF1	121.64	899.449	2.88223	0.00716769	0.134231	-2.37979
CG030	-34.2794	160.245	-2.8821	0.00717001	0.134231	-2.38004
SNRPN	-114.372	521.764	-2.88161	0.00717877	0.134231	-2.38098
ASCL2	633.739	2440.54	2.88155	0.00717974	0.134231	-2.38108
NR1D1	-21.7425	65.0673	-2.88152	0.0071804	0.134231	-2.38115
XLOC_012314	-5.21289	17.2383	-2.88092	0.00719104	0.134288	-2.38229
LOC100653245	-12.5684	22.3377	-2.88063	0.00719622	0.134288	-2.38285
SPDYE7P	-5.52007	18.3738	-2.88054	0.00719786	0.134288	-2.38302
LOC100507110	-18.7064	70.9613	-2.88006	0.00720633	0.134288	-2.38393
ERI3	-24.7561	106.744	-2.87996	0.00720816	0.134288	-2.38412
ABAT	167.805	622.041	2.87994	0.00720859	0.134288	-2.38417
AARSD1	-48.6603	273.051	-2.87913	0.00722315	0.134453	-2.38572
NMI	1269.71	5662.26	2.87898	0.00722584	0.134453	-2.38601
FBXW11	202.139	2076.74	2.87845	0.00723534	0.134486	-2.38702
ATP1B3	1397.75	7850.28	2.87831	0.00723771	0.134486	-2.38727
SNORD73A	-40.7962	188.773	-2.87818	0.00724016	0.134486	-2.38753
PIGT	386.558	3454.67	2.87776	0.00724764	0.134547	-2.38833
PCGF1	-43.5525	328.866	-2.87695	0.00726228	0.134667	-2.38988
ZFYVE16	70.5536	329.311	2.87694	0.00726249	0.134667	-2.3899
TRAF3IP2	-25.516	186.464	-2.87574	0.00728418	0.134991	-2.3922
PIDD	-316.23	1802.74	-2.87481	0.00730098	0.135181	-2.39397
C3orf19	194.718	1589.55	2.87453	0.00730602	0.135181	-2.3945
CXCL2	17.9431	85.7665	2.87447	0.00730708	0.135181	-2.39461
IGFBP7	537.004	1637.76	2.87325	0.0073293	0.13539	-2.39695
ZNF506	-18.9889	87.3047	-2.87305	0.00733293	0.13539	-2.39733
DPY19L3	6.24881	30.6502	2.87303	0.00733329	0.13539	-2.39737
SNX25	-20.4401	65.2301	-2.87292	0.00733525	0.13539	-2.39757
ESR2	-1.95542	4.82321	-2.87148	0.00736157	0.135797	-2.40033
XLOC_007985	-7.90627	30.9171	-2.86796	0.00742605	0.136886	-2.40704
PPRC1	-145.682	821.116	-2.86771	0.00743067	0.136886	-2.40752
UBASH3B	18.3501	91.6769	2.86757	0.00743336	0.136886	-2.4078
TOM1	1567.66	8290.57	2.8657	0.00746782	0.137441	-2.41136
PLXNA3	-157.794	565.111	-2.86518	0.00747737	0.137538	-2.41234
HIST2H2AB	1391.45	7044.55	2.86481	0.00748429	0.137587	-2.41305
HIST1H3E	3628.23	17125.2	2.86436	0.0074927	0.137662	-2.41391
WDR77	-72.2713	394.639	-2.86395	0.00750034	0.137681	-2.4147
XLOC_l2_012082	-6.06728	17.206	-2.86371	0.0075048	0.137681	-2.41516
BUD13	159.203	1289.88	2.86361	0.0075066	0.137681	-2.41534
XLOC_011766	-5.05174	12.4102	-2.86338	0.00751092	0.137682	-2.41578
APBB1IP	2517.15	13939.6	2.86306	0.00751686	0.137712	-2.41639
PARP8	328.339	1838.77	2.86232	0.0075307	0.137797	-2.41781
JUND	-90.8473	522.596	-2.8622	0.00753293	0.137797	-2.41804
SEPT7P2	49.3612	556.756	2.86209	0.00753489	0.137797	-2.41824
ZNF783	-29.1711	130.719	-2.86189	0.00753869	0.137797	-2.41862
COX3	-6245.42	42547.8	-2.8616	0.00754407	0.137817	-2.41917
LOC283352	59.6678	271.558	2.86108	0.00755377	0.137915	-2.42016
LOC441601	-3.79249	18.5761	-2.86052	0.0075643	0.138029	-2.42123
XLOC_001257	272.428	817.059	2.85976	0.00757861	0.138212	-2.42269
STAC3	315.259	969.926	2.85888	0.0075951	0.138284	-2.42436
HIST1H3G	808.139	4705.54	2.85867	0.00759894	0.138284	-2.42475
FGD4	216.76	762.334	2.85865	0.00759943	0.138284	-2.4248
RAB5A	280.384	2292.68	2.85863	0.00759982	0.138284	-2.42484
SDHD	158.027	1166.45	2.85827	0.0076065	0.138324	-2.42551
PLCL2	91.6714	759.148	2.85805	0.00761064	0.138324	-2.42593
RN7SK	8351.81	54699.3	2.85762	0.00761879	0.138394	-2.42675
ZNF638-IT1	-32.8956	126.006	-2.857	0.00763039	0.138526	-2.42792
BACH1	698.256	3704.69	2.85554	0.00765812	0.138908	-2.43071
ATG9B	-9.1587	25.6717	-2.85543	0.0076601	0.138908	-2.43091
ZNF516	264.102	939.37	2.85493	0.00766976	0.139002	-2.43188
XLOC_006285	-6.30699	43.9921	-2.85471	0.00767394	0.139002	-2.4323
UBE4B	83.2619	682.015	2.85391	0.00768907	0.139197	-2.43382
DENR	-27.7309	101.704	-2.85323	0.00770198	0.139352	-2.43511
XLOC_011329	-34.6042	118.861	-2.85297	0.00770688	0.139362	-2.4356
DMPK	-120.975	428.888	-2.85197	0.00772605	0.139393	-2.43751
ADARB1	-89.6643	344.513	-2.85193	0.00772686	0.139393	-2.43759
LOC151484	-4.35419	8.98065	-2.85181	0.00772915	0.139393	-2.43782
TRAT1	-192.164	749.225	-2.85177	0.00772983	0.139393	-2.43788
UST	-15.7433	34.1385	-2.85163	0.00773256	0.139393	-2.43815
TYMP	9752.01	101314	2.85151	0.00773494	0.139393	-2.43839
ACAA1	760.513	5600.79	2.85102	0.00774425	0.139393	-2.43932
ECHDC1	130.09	786.829	2.85063	0.00775173	0.139393	-2.44006
TLR1	1597.57	5882.49	2.85061	0.00775199	0.139393	-2.44009
COX6B1	1539.86	15581.5	2.85061	0.00775201	0.139393	-2.44009
RSBN1L	227.132	1492.53	2.85011	0.0077617	0.13941	-2.44105
H1FX	-121.414	584.209	-2.8501	0.00776185	0.13941	-2.44106
S100P	29140.5	41558.8	2.84965	0.00777055	0.13941	-2.44192
DYX1C1	5.79852	20.7567	2.84919	0.00777932	0.13941	-2.44279
TNFRSF10B	455.093	2539.4	2.84908	0.00778155	0.13941	-2.44301
COMMD8	230.637	1606.09	2.84899	0.00778325	0.13941	-2.44318
NCDN	-29.5651	129.455	-2.84898	0.00778336	0.13941	-2.44319
CAMSAP1	-7.19202	44.8642	-2.84852	0.00779218	0.13949	-2.44406
MYEF2	-11.5419	23.4078	-2.84813	0.00779972	0.139528	-2.44481
RDM1	-7.36287	21.7324	-2.84794	0.00780352	0.139528	-2.44518
CCBL1	-29.1898	178.147	-2.84774	0.00780738	0.139528	-2.44556
MDN1	-10.1554	32.8906	-2.84739	0.00781412	0.139571	-2.44622
RUFY2	-17.9368	80.5244	-2.84708	0.00782	0.139598	-2.4468
CCDC125	413.646	1967.73	2.84685	0.00782441	0.139599	-2.44724
XLOC_013900	-5.71517	23.3367	-2.84661	0.00782919	0.139607	-2.44771
XLOC_002845	-2.87309	12.7877	-2.84617	0.00783772	0.139681	-2.44854
XLOC_000292	-18.993	32.9654	-2.84573	0.00784626	0.139756	-2.44938
SLC25A16	-83.414	468.587	-2.84546	0.00785139	0.139769	-2.44988
GALNT3	61.3245	244.8	2.84497	0.00786101	0.139863	-2.45082
ZNF439	-29.919	108.83	-2.84456	0.00786885	0.139904	-2.45159
ST3GAL6	153.465	514.053	2.8444	0.00787201	0.139904	-2.4519
CNNM1	-2.30699	4.12224	-2.84346	0.00789024	0.140109	-2.45368
PLEK	758.101	4836.84	2.8432	0.00789547	0.140109	-2.45419
MRPL38	-32.0486	175.491	-2.84313	0.00789667	0.140109	-2.45431
ULK3	-98.7934	428.239	-2.84228	0.00791328	0.140326	-2.45592
LOC644714	-13.6618	66.0289	-2.84172	0.00792425	0.140443	-2.45699
SERINC3	279.631	2104.82	2.84006	0.00795684	0.140943	-2.46014
FRMD8	229.832	1592.61	2.83949	0.00796803	0.141063	-2.46122
FCRL1	-82.9371	149.156	-2.83865	0.00798451	0.141185	-2.46281
MGC13053	-15436.2	92632.5	-2.83864	0.00798479	0.141185	-2.46284
SGTB	156.392	1126.32	2.83847	0.00798812	0.141185	-2.46316
RNF216P1	1273.63	7013.83	2.83753	0.00800662	0.141279	-2.46494
SNW1	311.974	2692.88	2.83731	0.00801115	0.141279	-2.46537
FOSL2	227.441	1002.48	2.83705	0.0080162	0.141279	-2.46586
XLOC_l2_004854	-55.295	233.55	-2.83703	0.00801667	0.141279	-2.4659
CYBA	2912.06	20928.4	2.8369	0.00801917	0.141279	-2.46614
LOC100506024	-9.17334	19.4969	-2.83686	0.00801988	0.141279	-2.46621
APH1B	343.945	1682.04	2.83647	0.00802761	0.141338	-2.46695
EIF2D	-50.5706	300.363	-2.83573	0.00804229	0.141493	-2.46835
TTC39A	-3.09744	7.60621	-2.83558	0.00804523	0.141493	-2.46863
PPP1R10	129.275	1434.09	2.83442	0.00806836	0.141765	-2.47084
LOC100506983	-24.4494	83.1826	-2.834	0.00807672	0.141765	-2.47164
RG9MTD3	-19.378	122.235	-2.83391	0.00807849	0.141765	-2.47181
PAIP2	858.331	6351.19	2.83379	0.00808089	0.141765	-2.47203
SRPK1	1443.78	4450.23	2.8337	0.00808283	0.141765	-2.47222
XLOC_002035	4.48461	14.4671	2.83246	0.00810741	0.142119	-2.47455
ITIH4	-338.384	1359.24	-2.83172	0.00812227	0.142302	-2.47596
XLOC_002997	-38.4093	126.163	-2.83116	0.00813349	0.142421	-2.47702
CCDC92	-155.44	785.673	-2.8305	0.00814672	0.142574	-2.47827
ZBTB34	314.683	1606.59	2.83025	0.00815188	0.142587	-2.47876
DCUN1D3	57.0726	467.947	2.83001	0.00815665	0.142593	-2.47921
LRIG2	-16.8802	97.5191	-2.82945	0.00816781	0.142655	-2.48026
F12	154.621	495.474	2.82939	0.00816915	0.142655	-2.48038
LOC100652787	62.6938	281.644	2.82772	0.00820276	0.143051	-2.48354
FOXP3	-13.1053	28.0951	-2.82743	0.00820869	0.143051	-2.4841
ZNF789	-29.9896	134.111	-2.82738	0.00820964	0.143051	-2.48418
COX2	-9806.97	38694.5	-2.82731	0.00821105	0.143051	-2.48432
LPCAT3	705.367	4458.56	2.82708	0.00821579	0.143051	-2.48476
SNORD38B	-41.655	151.492	-2.82693	0.00821884	0.143051	-2.48505
UBTD1	365.343	1319.57	2.82672	0.00822301	0.143051	-2.48543
TMEM154	758.214	3126.95	2.82638	0.00822995	0.143054	-2.48608
EI24	-52.5421	312.868	-2.82612	0.00823517	0.143054	-2.48657
SLC7A1	-36.259	163.012	-2.82587	0.00824034	0.143054	-2.48705
GYLTL1B	-38.885	127.888	-2.82583	0.00824104	0.143054	-2.48712
EGLN1	1057.3	4263.26	2.82548	0.0082483	0.143103	-2.4878
RIT1	215.541	1030.99	2.82454	0.00826739	0.143357	-2.48957
KANSL3	-28.4584	148.418	-2.82376	0.00828318	0.143553	-2.49104
MED26	131.608	1433.12	2.82282	0.00830238	0.143808	-2.49282
IGJ	-1424.66	2064.21	-2.82151	0.00832928	0.144196	-2.4953
XLOC_009826	-4.09574	5.44293	-2.82099	0.00833995	0.144257	-2.49629
C7orf23	-162.333	946.002	-2.82086	0.00834262	0.144257	-2.49653
TCTE3	-6.70395	24.6889	-2.82049	0.00835024	0.144257	-2.49723
INPP5K	258.145	3105.4	2.82046	0.00835078	0.144257	-2.49728
MED30	100.133	676.166	2.8196	0.00836851	0.144355	-2.49891
HLA-DRB5	-7681.39	15882.4	-2.81944	0.00837192	0.144355	-2.49923
TALDO1	12199.1	60778.7	2.81943	0.00837197	0.144355	-2.49923
SNORA68	-19.9061	152.504	-2.81931	0.0083745	0.144355	-2.49946
NPC1	-89.1859	378.196	-2.81768	0.00840815	0.144791	-2.50254
MKRN1	783.971	5993.35	2.81765	0.00840879	0.144791	-2.5026
CHAMP1	-40.3389	274.2	-2.81702	0.0084219	0.144884	-2.5038
CYP4F3	358.054	849.424	2.81695	0.00842321	0.144884	-2.50392
HIST2H3D	3970.55	19942.9	2.81634	0.00843589	0.145024	-2.50508
SCAND1	54.72	511.813	2.81537	0.00845619	0.145295	-2.50692
NUP153	181.605	1748.85	2.81496	0.00846462	0.145362	-2.50769
RCE1	-15.8884	93.487	-2.81439	0.00847657	0.145418	-2.50877
HS6ST1	133.465	793.275	2.81434	0.0084775	0.145418	-2.50886
C20orf118	-2.30463	5.34285	-2.81415	0.00848145	0.145418	-2.50921
RPAP3	49.6187	351.023	2.81389	0.008487	0.145435	-2.50972
ZNF574	-80.3639	565.556	-2.81338	0.00849749	0.145459	-2.51067
FAM96A	402.174	3388.98	2.81326	0.0085	0.145459	-2.51089
SLC17A5	58.5873	537.364	2.81317	0.00850202	0.145459	-2.51107
FAM104A	340.944	3058.97	2.81289	0.00850791	0.145483	-2.51161
SH3GL1P2	-11.8124	41.658	-2.81262	0.00851348	0.1455	-2.51211
XLOC_008745	-9.93803	35.3114	-2.81146	0.00853779	0.145776	-2.5143
NFE2	7994.56	28415	2.81142	0.0085387	0.145776	-2.51438
LRRC59	122.345	988.542	2.81014	0.00856554	0.14605	-2.51679
LOC100287314	16.3868	154.829	2.81009	0.0085667	0.14605	-2.5169
DNAJC30	-54.9508	288.283	-2.80983	0.00857206	0.14605	-2.51738
COPS2	91.067	847.079	2.80979	0.00857296	0.14605	-2.51746
PRRC2A	-100.115	417.678	-2.80878	0.00859424	0.146335	-2.51936
MBP	629.595	3710.87	2.80851	0.00859991	0.146354	-2.51987
ARL8B	168.582	1297.35	2.80826	0.00860526	0.146367	-2.52035
HSD17B8	-59.8378	269.371	-2.80679	0.00863639	0.146819	-2.52312
KLHL26	-11.4314	78.1081	-2.80624	0.00864798	0.146852	-2.52415
PLEKHG2	-44.8876	201.678	-2.80609	0.00865114	0.146852	-2.52443
PAN2	-91.4199	235.149	-2.80605	0.00865209	0.146852	-2.52452
MPI	-106.566	683.167	-2.80499	0.00867468	0.14712	-2.52652
XLOC_006415	-5.8175	12.6052	-2.80488	0.00867702	0.14712	-2.52672
SMPDL3A	96.2503	287.962	2.80428	0.00868978	0.147217	-2.52785
ZNF775	89.6243	679.397	2.80418	0.00869194	0.147217	-2.52804
CRNKL1	22.7556	179.896	2.80319	0.00871307	0.147497	-2.52991
VPS29	157.404	1334.25	2.80294	0.00871845	0.14751	-2.53038
RHOF	-40.2989	194.066	-2.80248	0.00872831	0.147532	-2.53125
LOC100134237	-15.8617	98.9927	-2.80245	0.00872895	0.147532	-2.53131
LOC100131043	-123.422	240.503	-2.802	0.00873858	0.147617	-2.53215
ANAPC2	-27.8687	78.0056	-2.80151	0.00874904	0.147716	-2.53307
USP20	-152.638	966.009	-2.80039	0.00877315	0.147848	-2.53519
XLOC_l2_015451	1085.51	7360.42	2.80028	0.00877555	0.147848	-2.5354
CEBPB	6175.4	32675.3	2.80016	0.00877801	0.147848	-2.53561
B3GNT8	1142.49	3893.51	2.8001	0.00877937	0.147848	-2.53573
TECPR2	221.621	740.869	2.80008	0.00877989	0.147848	-2.53578
HSPA6	547.421	2313.83	2.79939	0.00879482	0.147894	-2.53708
C1orf96	182.89	925.139	2.79937	0.00879507	0.147894	-2.5371
SERINC5	-27.518	163.817	-2.79931	0.00879644	0.147894	-2.53722
LRRN3	-362.818	410.944	-2.79899	0.00880342	0.147933	-2.53783
LOC340335	-106.935	247.268	-2.79861	0.00881156	0.147993	-2.53854
SLCO4A1	-3.41707	7.23981	-2.79832	0.00881785	0.148021	-2.53909
QKI	57.1194	466.483	2.79753	0.00883486	0.148229	-2.54057
ANGEL1	-18.1863	85.2913	-2.79683	0.00885006	0.148406	-2.54189
SKP1	581.17	5797.14	2.79648	0.00885763	0.148456	-2.54255
SNRPA	-202.129	1153.74	-2.79608	0.00886636	0.148524	-2.5433
CXCL1	350.906	1113.28	2.79539	0.00888138	0.148698	-2.5446
PSMB8	698.925	4339.71	2.79462	0.00889829	0.148879	-2.54606
GIMAP5	-618.449	2950.32	-2.79428	0.00890556	0.148879	-2.54669
FAM20C	121.454	440.461	2.79426	0.00890612	0.148879	-2.54674
FAM26F	1444.78	3617.5	2.79339	0.00892514	0.14912	-2.54838
TRIM25	1895.64	9292.09	2.79111	0.0089752	0.149878	-2.55267
RPH3AL	40.057	112.59	2.79064	0.0089854	0.149963	-2.55354
POFUT2	-10.1827	58.1151	-2.79045	0.00898967	0.149963	-2.55391
HMGB1	566.556	6530.22	2.78896	0.00902256	0.150397	-2.55671
EXOSC6	-89.7097	347.695	-2.78885	0.00902501	0.150397	-2.55692
FGFR1OP2	29.9261	321.96	2.78818	0.00903975	0.150509	-2.55817
TIMM22	-39.0813	272.66	-2.78812	0.00904117	0.150509	-2.55829
HHAT	-12.1192	47.6584	-2.78773	0.00904984	0.150576	-2.55903
AFG3L1P	-155.44	838.731	-2.78747	0.00905554	0.150592	-2.55951
XLOC_011016	-6.78273	17.4843	-2.78705	0.00906495	0.150602	-2.56031
NUAK2	2269.08	11720	2.78702	0.00906549	0.150602	-2.56035
RBM4	-46.2013	462.71	-2.78651	0.00907691	0.150713	-2.56132
C3orf74	-12.6135	8.52525	-2.78609	0.00908629	0.150791	-2.56211
LIN54	43.307	359.548	2.78553	0.00909864	0.15087	-2.56316
EXOC8	48.0123	385.432	2.78525	0.00910493	0.15087	-2.56369
FCRL2	-91.7951	167.159	-2.78524	0.00910517	0.15087	-2.56371
WBP1	-134.092	1607.96	-2.78497	0.00911108	0.15089	-2.5642
IL13RA1	1570.57	7040.51	2.7847	0.0091172	0.150914	-2.56472
MCRS1	-101.904	652.261	-2.7834	0.00914619	0.151315	-2.56716
GYPC	-176.876	946.259	-2.78269	0.00916217	0.151502	-2.5685
TNFRSF25	-897.895	3417.57	-2.78216	0.00917416	0.151582	-2.5695
XLOC_000041	-4.58905	14.0698	-2.78194	0.00917908	0.151582	-2.56991
LOC157562	-30.2037	122.464	-2.78182	0.00918164	0.151582	-2.57013
FLJ39051	91.6664	275.863	2.78116	0.00919645	0.151582	-2.57136
CASP5	1791.75	9465.93	2.78101	0.00919995	0.151582	-2.57165
ARHGDIB	14606.8	114784	2.78101	0.00919996	0.151582	-2.57165
CHD3	-512.094	3032.11	-2.781	0.00920007	0.151582	-2.57166
ARHGEF1	-80.2619	539.324	-2.78061	0.00920902	0.151651	-2.57241
ZDHHC23	-17.3237	57.761	-2.77961	0.00923152	0.151873	-2.57428
TOMM70A	-22.3554	94.6579	-2.77959	0.00923199	0.151873	-2.57432
MEMO1	30.4001	304.007	2.77819	0.00926371	0.152305	-2.57695
IFI30	12840.4	58882.7	2.77801	0.00926772	0.152305	-2.57729
LOC100287628	-89.8536	377.617	-2.77743	0.00928073	0.152389	-2.57836
BTBD9	66.5373	507.167	2.77736	0.00928232	0.152389	-2.57849
RNU1-5	530.409	4248.75	2.77715	0.00928718	0.152391	-2.5789
C14orf182	-30.4802	97.967	-2.77629	0.00930675	0.152592	-2.58051
PDAP1	34.2648	354.598	2.77619	0.00930898	0.152592	-2.5807
XLOC_010561	-3.41668	6.97539	-2.77582	0.00931736	0.152651	-2.58139
LOC285965	-10.6351	16.7684	-2.77467	0.00934375	0.152931	-2.58356
HNRNPH3	204.948	1835.79	2.77459	0.00934546	0.152931	-2.5837
XLOC_l2_004706	-7.01684	38.8219	-2.77445	0.0093487	0.152931	-2.58396
LOC152217	662.784	4584.23	2.77356	0.00936907	0.153186	-2.58563
STK38L	15.7173	84.6798	2.77311	0.00937935	0.153276	-2.58647
SELL	6351.77	33116.9	2.77235	0.00939686	0.153484	-2.5879
TTLL4	44.063	271.362	2.77185	0.00940831	0.153566	-2.58884
KIAA1841	40.2351	174.867	2.77171	0.00941148	0.153566	-2.5891
ATP13A2	-40.2943	231.444	-2.77134	0.00941997	0.153627	-2.58979
SOAT1	61.7161	378.034	2.77109	0.00942571	0.153642	-2.59026
IER3	430.035	1393.51	2.77063	0.00943636	0.153737	-2.59112
XLOC_004293	21.8604	64.3869	2.76978	0.00945603	0.15398	-2.59272
GABARAPL2	546.544	3307.49	2.76871	0.00948085	0.154305	-2.59473
TRIM8	514.214	3328.01	2.76837	0.0094887	0.154355	-2.59537
FGFRL1	-33.3522	101.231	-2.76787	0.00950012	0.154462	-2.59629
C11orf54	114.007	772.903	2.76681	0.00952495	0.154687	-2.59829
ZNF335	-108.299	709.299	-2.76657	0.00953051	0.154687	-2.59874
RPS19BP1	235.228	2046.55	2.76633	0.00953598	0.154687	-2.59918
AQP9	8358.3	27558.1	2.76625	0.0095379	0.154687	-2.59933
GHRLOS2	-10.4709	33.9455	-2.76624	0.00953806	0.154687	-2.59935
NR3C2	-28.9104	81.6515	-2.7658	0.00954827	0.154775	-2.60017
LOC100507015	624.006	2713.16	2.76543	0.00955707	0.154839	-2.60087
MUTYH	-195.249	1147.81	-2.76514	0.00956373	0.154869	-2.60141
BUD31	228.27	1721.75	2.76467	0.00957472	0.154899	-2.60229
RPL10L	-4558.94	23003.9	-2.76465	0.00957527	0.154899	-2.60233
NUDCD3	-31.743	218.832	-2.76349	0.00960233	0.155259	-2.6045
ZNF44	-30.3375	141.772	-2.7624	0.00962785	0.155593	-2.60653
XLOC_011819	-14.6237	46.7847	-2.76194	0.00963864	0.155689	-2.60739
RFPL3-AS1	-12.4549	28.6541	-2.76056	0.00967134	0.15602	-2.60999
OSM	150.043	479.696	2.76048	0.00967313	0.15602	-2.61013
CNPY4	-26.9738	111.668	-2.76046	0.00967371	0.15602	-2.61018
XLOC_011763	-8.84907	52.7171	-2.76015	0.00968104	0.156059	-2.61076
ITPRIP	1588.28	6776.02	2.75971	0.00969139	0.156148	-2.61158
FAM151B	9.12975	29.8683	2.7591	0.00970572	0.156214	-2.61271
OGFOD1	-106.771	444.356	-2.75885	0.00971156	0.156214	-2.61317
ZNF785	-14.379	26.97	-2.75878	0.00971343	0.156214	-2.61332
XLOC_000903	-5.43132	4.75252	-2.75858	0.00971799	0.156214	-2.61368
LMF1	-73.7384	196.925	-2.7585	0.00971988	0.156214	-2.61383
XLOC_011849	-53.6719	246.028	-2.75809	0.00972975	0.156295	-2.61461
VDR	308.31	1348.65	2.75779	0.00973679	0.156312	-2.61516
DBP	-69.0991	428.589	-2.75745	0.00974481	0.156312	-2.61579
[truncated: 30,081 more rows]
