# Supplementary material
Source: Research Square preprint supplement (doi:10.21203/rs.3.rs-8976053/v1)
Supplement: Supplementary file 9 [file 6c81a9e0b12d004641e142bd.xlsx]

## Sheet: Sheet1
p_val	avg_log2FC	pct.1	pct.2	p_val_adj	cluster	gene
0	6.15229	0.937	0.165	0	OLI	RNF220
0	6.44923	0.8	0.047	0	OLI	C10orf90
0	6.48234	0.779	0.045	0	OLI	ST18
0	6.32104	0.763	0.05	0	OLI	MOG
0	5.40789	0.813	0.148	0	OLI	ENPP2
0	5.38036	0.695	0.059	0	OLI	SHROOM4
0	6.06829	0.704	0.082	0	OLI	MOBP
0	3.79376	0.821	0.199	0	OLI	FRMD4B
0	4.87546	0.705	0.085	0	OLI	DOCK5
0	3.4857	0.857	0.253	0	OLI	DOCK10
0	5.7035	0.663	0.073	0	OLI	CLMN
0	2.69101	0.82	0.256	0	OLI	ZNF536
0	5.27477	0.622	0.062	0	OLI	ABCA8
0	6.31904	0.595	0.036	0	OLI	OPALIN
0	4.84028	0.64	0.082	0	OLI	KCNH8
0	5.82862	0.595	0.038	0	OLI	FA2H
0	5.41512	0.609	0.058	0	OLI	MAG
0	4.69945	0.885	0.338	0	OLI	PLP1
0	5.23024	0.996	0.45	0	OLI	MBP
0	4.77458	0.634	0.089	0	OLI	FOLH1
0	4.16021	0.614	0.073	0	OLI	BCAS1
0	5.18745	0.622	0.084	0	OLI	UGT8
0	2.85522	0.786	0.258	0	OLI	NCKAP5
0	4.49	0.865	0.351	0	OLI	QDPR
0	6.39685	0.53	0.029	0	OLI	ANLN
0	3.31195	0.642	0.154	0	OLI	DOCK1
0	4.72783	0.55	0.071	0	OLI	RASGRP3
0	3.03245	0.707	0.236	0	OLI	HIP1
0	5.56511	0.52	0.05	0	OLI	COL4A5
0	4.55321	0.548	0.081	0	OLI	TTYH2
0	3.98998	0.819	0.356	0	OLI	KIF13B
0	3.50656	0.621	0.16	0	OLI	DAAM2
0	4.60371	0.624	0.167	0	OLI	ITGA2
0	2.32602	0.742	0.299	0	OLI	MAML2
0	4.15936	0.701	0.259	0	OLI	PLEKHH1
0	5.14116	0.537	0.097	0	OLI	HHIP
0	3.664	0.877	0.437	0	OLI	PHLPP1
0	4.07103	0.93	0.496	0	OLI	PIP4K2A
0	3.294	0.637	0.212	0	OLI	FGFR2
0	2.97683	0.532	0.113	0	OLI	PLD1
0	2.14867	0.82	0.403	0	OLI	ST6GALNAC3
0	4.56824	0.46	0.061	0	OLI	PLLP
0	3.87899	0.881	0.491	0	OLI	PDE8A
0	6.0092	0.416	0.026	0	OLI	MYRF
0	4.45786	0.559	0.172	0	OLI	SLC5A11
0	3.61733	0.651	0.266	0	OLI	HIPK2
0	3.42954	0.869	0.484	0	OLI	PLCL1
0	3.87847	0.654	0.272	0	OLI	TMC7
0	3.46814	0.966	0.588	0	OLI	TMTC2
0	3.05874	0.566	0.188	0	OLI	PARD3B
0	3.99254	0.439	0.063	0	OLI	CDH19
0	6.42167	0.401	0.026	0	OLI	CNDP1
0	2.94479	0.509	0.138	0	OLI	MEGF10
0	3.31648	0.985	0.616	0	OLI	ENSMFAG00000044069
0	2.36694	0.897	0.531	0	OLI	CDH20
0	3.11463	0.815	0.45	0	OLI	ENSMFAG00000041985
0	4.47639	0.459	0.095	0	OLI	TF
0	3.40191	0.428	0.069	0	OLI	SMOC1
0	0.264051	0.264	0.621	0	OLI	TTC37
0	0.303079	0.285	0.641	0	OLI	DCAF10
0	0.279486	0.285	0.638	0	OLI	DNM1L
0	0.250297	0.303	0.654	0	OLI	TTC14
0	3.11999	0.802	0.451	0	OLI	USP54
0	0.257531	0.297	0.644	0	OLI	ARHGAP35
0	0.275123	0.275	0.619	0	OLI	WDR33
0	0.283803	0.297	0.64	0	OLI	SRRM2
0	4.69494	0.389	0.047	0	OLI	CLIC4
0	0.279066	0.255	0.597	0	OLI	REPS2
0	0.333427	0.27	0.611	0	OLI	PKP4
0	0.258675	0.262	0.599	0	OLI	EPC2
0	0.272273	0.254	0.59	0	OLI	XRCC5
0	4.5418	0.415	0.079	0	OLI	LPAR1
0	0.330317	0.255	0.591	0	OLI	RNF157
0	0.327173	0.27	0.605	0	OLI	NEMF
0	0.25259	0.251	0.586	0	OLI	ZNF207
0	0.31333	0.26	0.594	0	OLI	CUL3
0	0.294605	0.234	0.567	0	OLI	NRDC
0	0.331712	0.265	0.598	0	OLI	BBS9
0	3.76961	0.582	0.25	0	OLI	CNTN2
0	0.272959	0.254	0.586	0	OLI	PIBF1
0	0.270518	0.24	0.57	0	OLI	TRAPPC8
0	1.72632	0.566	0.237	0	OLI	RELN
0	0.334646	0.275	0.602	0	OLI	AGO3
0	2.44248	0.947	0.62	0	OLI	SPOCK3
0	0.328745	0.245	0.568	0	OLI	CORO2B
0	3.31559	0.68	0.358	0	OLI	SLC25A13
0	0.273819	0.212	0.534	0	OLI	CNOT4
0	0.26028	0.226	0.547	0	OLI	FOXO3
0	0.253244	0.208	0.529	0	OLI	CSTF3
0	0.396162	0.26	0.581	0	OLI	CWC27
0	0.309758	0.204	0.524	0	OLI	AGK
0	0.352082	0.239	0.557	0	OLI	SPAST
0	0.316838	0.246	0.564	0	OLI	DTWD2
0	0.326529	0.237	0.554	0	OLI	BCLAF1
0	3.64731	0.416	0.099	0	OLI	CYP27A1
0	0.315267	0.238	0.554	0	OLI	PTPRA
0	0.298108	0.219	0.534	0	OLI	MARCH7
0	0.321808	0.251	0.565	0	OLI	ATAD2B
0	3.32913	0.807	0.494	0	OLI	ERBIN
0	0.333422	0.24	0.553	0	OLI	KIAA2026
0	0.282074	0.199	0.512	0	OLI	ERP44
0	3.64492	0.918	0.606	0	OLI	SLC44A1
0	3.7644	0.425	0.113	0	OLI	ENSMFAG00000047151
0	0.502889	0.213	0.524	0	OLI	LRRC49
0	0.305008	0.233	0.544	0	OLI	ENSMFAG00000040746
0	5.19079	0.353	0.042	0	OLI	ENSMFAG00000046541
0	0.306686	0.204	0.513	0	OLI	ABL1
0	4.19904	0.442	0.133	0	OLI	HAPLN2
0	0.279151	0.186	0.495	0	OLI	WDR59
0	0.399231	0.215	0.523	0	OLI	ASXL1
0	0.331941	0.213	0.521	0	OLI	ZFP90
0	0.285728	0.186	0.493	0	OLI	SESTD1
0	0.366817	0.236	0.542	0	OLI	SLC25A36
0	0.346995	0.222	0.528	0	OLI	KDM3B
0	0.390431	0.255	0.561	0	OLI	ZC3H13
0	0.310478	0.207	0.513	0	OLI	STRADA
0	0.320554	0.211	0.516	0	OLI	SMARCA5
0	0.326945	0.196	0.501	0	OLI	ENSMFAG00000033257
0	4.07142	0.423	0.118	0	OLI	NDRG1
0	0.351432	0.171	0.476	0	OLI	SYT16
0	0.386216	0.255	0.557	0	OLI	RAP1GDS1
0	0.497708	0.25	0.552	0	OLI	INSR
0	0.380841	0.223	0.524	0	OLI	ARIH2
0	2.88942	0.6	0.3	0	OLI	CREB5
0	0.263358	0.18	0.479	0	OLI	CUL4A
0	0.328513	0.238	0.535	0	OLI	NAPB
0	0.273496	0.178	0.475	0	OLI	RAF1
0	0.300811	0.174	0.47	0	OLI	EXOC5
0	3.76927	0.428	0.132	0	OLI	SYT9
0	0.367895	0.209	0.504	0	OLI	RALGAPB
0	3.68624	0.468	0.174	0	OLI	EPB41L4A
0	3.45023	0.715	0.421	0	OLI	PRUNE2
0	0.435561	0.226	0.519	0	OLI	CWF19L2
0	5.40061	0.315	0.022	0	OLI	ERBB3
0	3.48229	0.456	0.164	0	OLI	PHLDB1
0	0.31385	0.196	0.488	0	OLI	DDX6
0	0.302338	0.188	0.48	0	OLI	PUS10
0	0.472278	0.207	0.498	0	OLI	VPS50
0	0.374421	0.206	0.497	0	OLI	MORF4L1
0	0.263124	0.173	0.464	0	OLI	VTA1
0	0.309154	0.235	0.526	0	OLI	APPL2
0	0.452364	0.218	0.508	0	OLI	CTDSPL2
0	0.306268	0.203	0.493	0	OLI	ERO1B
0	0.334764	0.195	0.484	0	OLI	BAZ1B
0	0.377371	0.197	0.486	0	OLI	UBE4A
0	4.81714	0.318	0.03	0	OLI	PLEKHG3
0	5.00128	0.323	0.035	0	OLI	ERMN
0	0.296772	0.191	0.479	0	OLI	PHF20
0	0.274725	0.161	0.448	0	OLI	ZNF654
0	2.77995	0.775	0.488	0	OLI	GAB1
0	0.406218	0.219	0.506	0	OLI	XPO6
0	0.378627	0.173	0.458	0	OLI	NVL
0	0.276708	0.171	0.456	0	OLI	HSD17B4
0	0.336394	0.197	0.482	0	OLI	ZDHHC17
0	0.278209	0.164	0.448	0	OLI	SARNP
0	0.400664	0.235	0.519	0	OLI	RNF144A
0	0.423755	0.204	0.487	0	OLI	FUBP1
0	0.434892	0.221	0.503	0	OLI	CSDE1
0	0.408671	0.213	0.495	0	OLI	FAM208A
0	3.95152	0.398	0.116	0	OLI	TMEM144
0	0.300436	0.179	0.461	0	OLI	HNRNPM
0	0.323936	0.192	0.474	0	OLI	EYA3
0	3.61577	0.452	0.171	0	OLI	SPP1
0	0.375691	0.208	0.489	0	OLI	DPP8
0	0.396919	0.207	0.488	0	OLI	SLC25A27
0	0.433662	0.199	0.48	0	OLI	DROSHA
0	0.372147	0.223	0.502	0	OLI	ABHD2
0	0.426032	0.205	0.484	0	OLI	FBXO33
0	0.457116	0.22	0.498	0	OLI	RC3H1
0	0.401919	0.164	0.442	0	OLI	ENSMFAG00000042463
0	0.39854	0.206	0.484	0	OLI	RAB14
0	0.407674	0.181	0.458	0	OLI	ENSMFAG00000046566
0	0.285372	0.144	0.421	0	OLI	ENSMFAG00000035942
0	0.328935	0.169	0.445	0	OLI	KLHL24
0	0.340628	0.176	0.452	0	OLI	KLHDC2
0	0.47637	0.219	0.493	0	OLI	ENSMFAG00000040517
0	0.255324	0.146	0.42	0	OLI	LARS
0	0.462156	0.208	0.482	0	OLI	CEP162
0	0.287107	0.158	0.431	0	OLI	PSMB7
0	0.414702	0.179	0.452	0	OLI	TSGA10
0	0.380741	0.182	0.455	0	OLI	NOL4L
0	0.36396	0.224	0.497	0	OLI	BAIAP2
0	0.358614	0.173	0.445	0	OLI	HACD2
0	0.254774	0.148	0.42	0	OLI	PPP2R2D
0	0.307346	0.18	0.451	0	OLI	DNAJB6
0	0.278455	0.167	0.438	0	OLI	B3GAT1
0	0.298086	0.187	0.457	0	OLI	ARPP19
0	0.256192	0.138	0.408	0	OLI	ENSMFAG00000002899
0	0.277814	0.193	0.462	0	OLI	PCDH10
0	0.387045	0.22	0.489	0	OLI	YPEL3
0	0.414336	0.17	0.438	0	OLI	TBC1D15
0	0.373273	0.172	0.438	0	OLI	FBXO9
0	0.281781	0.163	0.428	0	OLI	SEC62
0	0.486581	0.186	0.451	0	OLI	CRBN
0	0.368277	0.184	0.449	0	OLI	PAXBP1
0	2.59905	0.41	0.145	0	OLI	CHD7
0	0.313307	0.189	0.454	0	OLI	ENSMFAG00000003188
0	0.395186	0.164	0.428	0	OLI	SLC25A26
0	0.439708	0.186	0.45	0	OLI	SAFB
0	0.263566	0.136	0.399	0	OLI	UBQLN1
0	0.382395	0.16	0.423	0	OLI	RPS6KB1
0	0.275819	0.183	0.445	0	OLI	RCHY1
0	0.448985	0.184	0.445	0	OLI	HBS1L
0	0.477189	0.204	0.465	0	OLI	NBEAL1
0	0.432619	0.173	0.434	0	OLI	NUP98
0	5.58633	0.281	0.021	0	OLI	MAL
0	0.430301	0.182	0.441	0	OLI	ANGEL2
0	0.316789	0.156	0.415	0	OLI	ZFX
0	3.12445	0.36	0.101	0	OLI	ABTB2
0	4.61133	0.323	0.064	0	OLI	FAM124A
0	4.17103	0.375	0.117	0	OLI	GPR37
0	0.389591	0.186	0.444	0	OLI	PRMT3
0	0.274347	0.142	0.4	0	OLI	CDIP1
0	0.316641	0.159	0.416	0	OLI	RNF11
0	0.307588	0.166	0.423	0	OLI	DDX3X
0	0.511675	0.198	0.455	0	OLI	ORC2
0	0.387248	0.186	0.443	0	OLI	ABHD12
0	0.386346	0.193	0.45	0	OLI	MINK1
0	0.424784	0.174	0.43	0	OLI	ASCC1
0	0.478741	0.186	0.442	0	OLI	RMND5A
0	0.441286	0.17	0.425	0	OLI	MECP2
0	0.421346	0.195	0.45	0	OLI	DSTN
0	0.307085	0.159	0.413	0	OLI	SYT11
0	0.418175	0.171	0.425	0	OLI	RSRC2
0	0.533194	0.198	0.451	0	OLI	ENSMFAG00000041704
0	0.462512	0.165	0.417	0	OLI	MAP3K7
0	0.461457	0.177	0.428	0	OLI	MORC3
0	0.261757	0.141	0.392	0	OLI	PIK3C2A
0	3.16235	0.968	0.718	0	OLI	PDE4B
0	0.409627	0.166	0.416	0	OLI	SLC30A7
0	0.403378	0.161	0.411	0	OLI	SLF2
0	0.288278	0.138	0.387	0	OLI	ARFGAP3
0	0.506606	0.19	0.438	0	OLI	TRIM23
0	0.387277	0.153	0.4	0	OLI	CD99L2
0	0.250807	0.128	0.375	0	OLI	IPO8
0	0.384739	0.155	0.401	0	OLI	KMT5B
0	0.336626	0.152	0.398	0	OLI	ENSMFAG00000043964
0	1.57266	0.443	0.197	0	OLI	FBXL7
0	3.01362	0.834	0.588	0	OLI	SHTN1
0	0.379633	0.18	0.426	0	OLI	AASDHPPT
0	0.415973	0.198	0.444	0	OLI	RAB1A
0	0.429266	0.168	0.414	0	OLI	ENSMFAG00000032714
0	2.05103	0.466	0.221	0	OLI	GLUL
0	0.390461	0.156	0.401	0	OLI	ENSMFAG00000036095
0	0.489453	0.168	0.413	0	OLI	XRN2
0	3.01923	0.55	0.306	0	OLI	TESK2
0	0.337333	0.142	0.386	0	OLI	TTF1
0	0.350407	0.151	0.393	0	OLI	RAD21
0	0.326325	0.129	0.371	0	OLI	WDR78
0	0.545482	0.173	0.415	0	OLI	FOXK1
0	0.465809	0.175	0.417	0	OLI	YTHDC1
0	3.01838	0.761	0.52	0	OLI	FRYL
0	0.621533	0.182	0.423	0	OLI	CABCOCO1
0	0.296943	0.124	0.365	0	OLI	WDSUB1
0	0.379128	0.174	0.415	0	OLI	LENG8
0	3.02571	0.383	0.143	0	OLI	MTUS1
0	0.453625	0.151	0.39	0	OLI	UBXN4
0	0.425592	0.143	0.382	0	OLI	VPS51
0	0.253386	0.129	0.368	0	OLI	ZNF589
0	0.528721	0.179	0.418	0	OLI	PEX1
0	0.285135	0.124	0.363	0	OLI	WDR11
0	0.309678	0.119	0.358	0	OLI	XPA
0	0.479207	0.174	0.413	0	OLI	SMAD4
0	0.399716	0.15	0.388	0	OLI	GOLPH3
0	4.79833	0.267	0.029	0	OLI	CNKSR3
0	4.04008	0.262	0.024	0	OLI	CPM
0	0.431246	0.141	0.379	0	OLI	SHLD2
0	0.367019	0.147	0.385	0	OLI	AATF
0	0.326501	0.135	0.373	0	OLI	ATPAF1
0	0.250094	0.131	0.369	0	OLI	CLK4
0	0.531653	0.179	0.417	0	OLI	MGAT4A
0	5.51278	0.257	0.02	0	OLI	SLCO1A2
0	0.323003	0.158	0.395	0	OLI	WBP1L
0	0.344677	0.129	0.366	0	OLI	ZC3H18
0	0.494357	0.155	0.391	0	OLI	UBA6
0	0.361194	0.148	0.383	0	OLI	EIF4G2
0	0.27003	0.128	0.363	0	OLI	XXYLT1
0	0.308822	0.137	0.372	0	OLI	ST13
0	0.474796	0.172	0.406	0	OLI	ARL8B
0	0.369588	0.167	0.401	0	OLI	GBE1
0	0.500826	0.169	0.403	0	OLI	HNRNPH3
0	0.419937	0.161	0.395	0	OLI	GOLGA1
0	0.25724	0.128	0.362	0	OLI	LYPLAL1
0	6.33264	0.246	0.012	0	OLI	SH3TC2
0	0.364905	0.123	0.357	0	OLI	POMK
0	0.511665	0.171	0.404	0	OLI	POC1B
0	0.419584	0.15	0.383	0	OLI	GKAP1
0	4.03083	0.335	0.103	0	OLI	LDB3
0	0.597823	0.17	0.402	0	OLI	ERGIC2
0	0.384014	0.178	0.41	0	OLI	ENO1
0	2.7006	0.481	0.249	0	OLI	SEMA6A
0	0.569949	0.165	0.396	0	OLI	TPR
0	0.371873	0.141	0.372	0	OLI	SECISBP2
0	3.0029	0.748	0.517	0	OLI	CDK19
0	0.501908	0.143	0.373	0	OLI	COG3
0	0.312749	0.118	0.348	0	OLI	PDCD10
0	2.85395	0.954	0.724	0	OLI	ELMO1
0	0.419182	0.159	0.388	0	OLI	GPBP1L1
0	0.392298	0.148	0.377	0	OLI	PPP2CB
0	0.326443	0.156	0.385	0	OLI	ACTR3
0	0.507065	0.164	0.393	0	OLI	RNF169
0	0.516972	0.151	0.38	0	OLI	SUGP1
0	2.50277	0.93	0.702	0	OLI	SLC24A2
0	0.435563	0.157	0.385	0	OLI	CBX3
0	0.516828	0.163	0.391	0	OLI	TRIP11
0	0.475505	0.16	0.388	0	OLI	ATP6V1E1
0	2.8367	0.303	0.075	0	OLI	COL9A1
0	0.320752	0.122	0.35	0	OLI	POU6F1
0	0.375583	0.139	0.367	0	OLI	RAB21
0	2.73595	0.311	0.083	0	OLI	RFTN2
0	3.04869	0.777	0.549	0	OLI	MSANTD3-TMEFF1
0	0.32638	0.118	0.346	0	OLI	MAN2A2
0	0.335231	0.141	0.368	0	OLI	RAB5A
0	0.265903	0.114	0.34	0	OLI	OTUD4
0	0.418685	0.169	0.395	0	OLI	VDAC3
0	0.614746	0.166	0.392	0	OLI	HMGXB4
0	0.395954	0.127	0.353	0	OLI	ASH2L
0	0.283002	0.118	0.344	0	OLI	TCEA1
0	3.08756	0.814	0.588	0	OLI	SLAIN1
0	0.274867	0.112	0.337	0	OLI	AP1G1
0	0.356631	0.125	0.35	0	OLI	ELP2
0	0.277948	0.112	0.336	0	OLI	SAMD4B
0	5.0214	0.258	0.034	0	OLI	PLPP2
0	2.83519	0.941	0.718	0	OLI	EDIL3
0	0.288981	0.124	0.347	0	OLI	USP8
0	0.306154	0.115	0.337	0	OLI	ZNF569
0	0.432745	0.132	0.354	0	OLI	ENSMFAG00000042337
0	0.40671	0.135	0.357	0	OLI	NUBPL
0	0.341293	0.125	0.347	0	OLI	KSR1
0	0.345393	0.119	0.34	0	OLI	TCP11L1
0	6.58915	0.232	0.011	0	OLI	DTHD1
0	0.471647	0.141	0.362	0	OLI	STAM
0	0.474532	0.14	0.361	0	OLI	MLH3
0	0.314029	0.12	0.34	0	OLI	SAP130
0	0.322514	0.113	0.333	0	OLI	CEP57
0	0.372851	0.125	0.345	0	OLI	ADAM17
0	0.298758	0.115	0.334	0	OLI	GOLGA5
0	3.63609	0.326	0.107	0	OLI	LRRC1
0	0.310696	0.11	0.329	0	OLI	API5
0	0.505012	0.148	0.367	0	OLI	ENSMFAG00000034228
0	0.535772	0.148	0.367	0	OLI	PANK1
0	0.294643	0.112	0.33	0	OLI	XIAP
0	0.385348	0.124	0.342	0	OLI	STAM2
0	0.250335	0.108	0.326	0	OLI	DDX1
0	0.323592	0.154	0.372	0	OLI	RAB3A
0	0.265441	0.138	0.355	0	OLI	EIF1B
0	0.483834	0.137	0.354	0	OLI	CCDC149
0	0.416328	0.127	0.343	0	OLI	MSL2
0	0.311699	0.124	0.34	0	OLI	ZNF655
0	2.91233	0.385	0.169	0	OLI	MYO1E
0	0.501097	0.142	0.358	0	OLI	CHORDC1
0	0.342012	0.115	0.33	0	OLI	PPWD1
0	0.263411	0.106	0.321	0	OLI	ENSMFAG00000030929
0	0.299191	0.108	0.323	0	OLI	NAE1
0	0.529731	0.141	0.356	0	OLI	ENSMFAG00000045677
0	0.343896	0.139	0.353	0	OLI	ENSMFAG00000039648
0	0.407413	0.115	0.328	0	OLI	WDR5
0	0.500586	0.133	0.346	0	OLI	THOC1
0	0.320843	0.122	0.334	0	OLI	PRDM5
0	0.295243	0.124	0.336	0	OLI	STXBP4
0	0.400901	0.133	0.345	0	OLI	ATP5MC2
0	2.28048	0.981	0.769	0	OLI	DCC
0	0.371348	0.117	0.328	0	OLI	POLR2B
0	0.301578	0.104	0.315	0	OLI	ZNF410
0	0.359767	0.12	0.331	0	OLI	ZNF431
0	0.583937	0.146	0.357	0	OLI	POT1
0	0.609124	0.144	0.355	0	OLI	EZH1
0	0.327851	0.124	0.334	0	OLI	PRPF38B
0	0.462862	0.154	0.364	0	OLI	TMBIM6
0	0.530881	0.137	0.346	0	OLI	TYRO3
0	0.308151	0.131	0.339	0	OLI	TANK
0	0.483723	0.143	0.351	0	OLI	SRBD1
0	3.65672	0.286	0.078	0	OLI	FAM107B
0	0.390257	0.114	0.321	0	OLI	HCFC2
0	0.304072	0.105	0.312	0	OLI	NHLRC2
0	0.433546	0.131	0.338	0	OLI	CPSF3
0	0.331866	0.103	0.31	0	OLI	CSNK2A2
0	0.33998	0.121	0.327	0	OLI	ANAPC16
0	0.554516	0.142	0.348	0	OLI	TM2D1
0	0.487031	0.129	0.334	0	OLI	SZT2
0	0.28619	0.115	0.32	0	OLI	SELENOT
0	0.338605	0.107	0.312	0	OLI	CCNT1
0	3.68977	0.263	0.058	0	OLI	PLEKHB1
0	0.312564	0.141	0.346	0	OLI	BEX2
0	0.353761	0.118	0.322	0	OLI	ENSMFAG00000042601
0	0.271151	0.104	0.308	0	OLI	PRKRA
0	0.411373	0.113	0.317	0	OLI	GOSR1
0	0.435911	0.127	0.331	0	OLI	DAZAP1
0	0.441639	0.128	0.331	0	OLI	PCBP2
0	0.359433	0.109	0.312	0	OLI	VAPB
0	0.266002	0.1	0.303	0	OLI	FIG4
0	0.435449	0.123	0.325	0	OLI	AKIRIN1
0	0.375169	0.111	0.313	0	OLI	ENSMFAG00000031284
0	0.278607	0.127	0.329	0	OLI	TUBB3
0	3.50947	0.358	0.156	0	OLI	ARHGAP23
0	0.437611	0.107	0.308	0	OLI	DNAJC17
0	0.427066	0.132	0.333	0	OLI	SLC38A2
0	0.32464	0.099	0.3	0	OLI	MAPKAPK5
0	0.320374	0.103	0.303	0	OLI	TARDBP
0	0.324946	0.102	0.302	0	OLI	ERCC6
0	0.329953	0.113	0.313	0	OLI	SP3
0	0.337374	0.121	0.32	0	OLI	RAP1B
0	0.361167	0.113	0.312	0	OLI	ATP6V0D1
0	0.329085	0.096	0.294	0	OLI	ADSS
0	0.302692	0.097	0.295	0	OLI	SLC7A14
0	0.283991	0.096	0.294	0	OLI	SEC11A
0	0.31276	0.096	0.294	0	OLI	ATG14
0	2.26616	0.292	0.094	0	OLI	PRKCQ
0	0.509101	0.13	0.327	0	OLI	TTC33
0	0.493136	0.123	0.32	0	OLI	FAN1
0	0.274816	0.105	0.302	0	OLI	CYHR1
0	2.82068	0.259	0.062	0	OLI	ZCCHC24
0	0.374542	0.103	0.3	0	OLI	PNPT1
0	0.397769	0.131	0.328	0	OLI	NDUFA13
0	0.43053	0.117	0.313	0	OLI	ENSMFAG00000001022
0	0.403101	0.114	0.31	0	OLI	ARFIP1
0	0.312721	0.119	0.315	0	OLI	SGPP1
0	0.284943	0.103	0.299	0	OLI	ENSMFAG00000046875
0	0.342715	0.129	0.325	0	OLI	HSP90B1
0	0.307656	0.126	0.322	0	OLI	GPD2
0	0.420192	0.123	0.319	0	OLI	CHMP5
0	3.76078	0.247	0.051	0	OLI	RNF125
0	0.31686	0.099	0.295	0	OLI	FLCN
0	2.78842	0.271	0.076	0	OLI	HEPACAM
0	0.385443	0.115	0.31	0	OLI	DNAJC3
0	0.346662	0.105	0.3	0	OLI	EXOC7
0	0.397398	0.128	0.323	0	OLI	CHCHD10
0	0.342442	0.097	0.292	0	OLI	HSPA9
0	0.258308	0.099	0.294	0	OLI	SFI1
0	0.269292	0.095	0.29	0	OLI	RTF2
0	0.401606	0.128	0.322	0	OLI	SETD7
0	0.273941	0.097	0.291	0	OLI	ECSIT
0	0.364984	0.104	0.297	0	OLI	ARPC1A
0	0.484177	0.118	0.311	0	OLI	SLC35F5
0	0.323652	0.097	0.29	0	OLI	ZNF592
0	2.67146	0.71	0.517	0	OLI	NAALADL2
0	0.418122	0.116	0.308	0	OLI	ENSMFAG00000043631
0	4.82447	0.211	0.019	0	OLI	ENSMFAG00000046457
0	0.343094	0.096	0.288	0	OLI	ATL3
0	3.00821	0.97	0.778	0	OLI	CTNNA3
0	0.385726	0.106	0.297	0	OLI	CEP63
0	0.423301	0.105	0.296	0	OLI	MACROD1
0	0.44704	0.108	0.299	0	OLI	ENSMFAG00000031734
0	0.318241	0.093	0.284	0	OLI	PARL
0	0.257427	0.08	0.27	0	OLI	GK5
0	0.329456	0.111	0.301	0	OLI	FKBP15
0	0.292607	0.112	0.302	0	OLI	ENSMFAG00000042475
0	0.424	0.101	0.291	0	OLI	DIS3L
0	0.268641	0.099	0.289	0	OLI	HAGH
0	2.86994	0.586	0.396	0	OLI	ATG4C
0	0.370012	0.105	0.294	0	OLI	HDLBP
0	0.343509	0.097	0.286	0	OLI	ENSMFAG00000046003
0	0.369385	0.095	0.284	0	OLI	BRMS1L
0	0.412996	0.099	0.288	0	OLI	FAM120C
0	0.360791	0.096	0.285	0	OLI	MAU2
0	0.381058	0.099	0.288	0	OLI	FYTTD1
0	0.355676	0.097	0.285	0	OLI	MFSD14B
0	0.364712	0.101	0.289	0	OLI	MARF1
0	0.30106	0.087	0.274	0	OLI	ANKZF1
0	0.269019	0.087	0.274	0	OLI	NSFL1C
0	0.283137	0.089	0.276	0	OLI	VPS4B
0	3.01826	0.498	0.311	0	OLI	CYP7B1
0	0.396906	0.1	0.287	0	OLI	KCNN3
0	0.292236	0.09	0.276	0	OLI	UCHL5
0	0.384041	0.095	0.281	0	OLI	SUGT1
0	0.383626	0.09	0.276	0	OLI	CERS4
0	0.389463	0.105	0.291	0	OLI	PHF8
0	0.425298	0.106	0.292	0	OLI	DHTKD1
0	0.424575	0.101	0.287	0	OLI	ENSMFAG00000033270
0	2.92288	0.248	0.063	0	OLI	PADI2
0	0.380317	0.107	0.292	0	OLI	HELQ
0	0.271845	0.087	0.271	0	OLI	TDRD7
0	0.336041	0.096	0.28	0	OLI	HNRNPUL1
0	4.13808	0.21	0.026	0	OLI	COL9A2
0	0.50819	0.11	0.294	0	OLI	MAPK1IP1L
0	4.27736	0.242	0.058	0	OLI	ASPA
0	2.45234	0.826	0.642	0	OLI	ARAP2
0	0.423167	0.11	0.293	0	OLI	PSMD4
0	0.510881	0.111	0.294	0	OLI	EIF3E
0	0.356145	0.11	0.293	0	OLI	XRCC6
0	0.404236	0.109	0.292	0	OLI	EIF2S2
0	0.271992	0.078	0.261	0	OLI	MPP2
0	0.408457	0.099	0.281	0	OLI	SNW1
0	0.292726	0.09	0.272	0	OLI	COMMD7
0	0.529171	0.115	0.297	0	OLI	UPF3A
0	4.32187	0.208	0.026	0	OLI	DIPK1C
0	0.449145	0.096	0.277	0	OLI	PHF6
0	0.266446	0.081	0.262	0	OLI	KDM1B
0	0.293012	0.105	0.286	0	OLI	OAT
0	0.421797	0.106	0.287	0	OLI	ISCA1
0	3.54739	0.266	0.086	0	OLI	FAM222A
0	0.363839	0.089	0.269	0	OLI	SLC15A4
0	0.313849	0.089	0.269	0	OLI	ALKBH5
0	0.3455	0.096	0.276	0	OLI	TERF2
0	2.92047	0.904	0.725	0	OLI	DIP2B
0	0.396772	0.093	0.272	0	OLI	POLR3B
0	0.394482	0.095	0.274	0	OLI	KCTD13
0	0.288661	0.084	0.263	0	OLI	TSNAX
0	0.327403	0.105	0.284	0	OLI	NDUFB5
0	2.49759	0.906	0.728	0	OLI	TCF12
0	0.375511	0.099	0.277	0	OLI	LRRC58
0	0.312919	0.095	0.273	0	OLI	SGCB
0	0.340123	0.093	0.271	0	OLI	OS9
0	3.18471	0.278	0.1	0	OLI	PPFIBP2
0	0.349731	0.089	0.267	0	OLI	PSMD7
0	3.92749	0.25	0.072	0	OLI	SEPT4
0	0.365868	0.111	0.289	0	OLI	FKBP8
0	0.427341	0.103	0.28	0	OLI	VPS36
0	4.28818	0.231	0.054	0	OLI	EFHD1
0	0.34248	0.094	0.27	0	OLI	HEXA
0	0.309651	0.091	0.267	0	OLI	RAD23A
0	0.506419	0.102	0.277	0	OLI	FAIM
0	0.252599	0.084	0.259	0	OLI	PLEKHM2
0	0.251268	0.076	0.251	0	OLI	ENSMFAG00000037720
0	0.388649	0.105	0.279	0	OLI	TMEM50B
0	0.359104	0.095	0.269	0	OLI	CEP120
0	0.398601	0.09	0.264	0	OLI	TRAM1
0	0.432204	0.097	0.271	0	OLI	DPY30
0	0.306055	0.083	0.257	0	OLI	RNF214
0	0.331497	0.089	0.262	0	OLI	PIGN
0	0.270709	0.075	0.248	0	OLI	TAB1
0	5.93234	0.182	0.009	0	OLI	CD22
0	3.15082	0.247	0.075	0	OLI	NEDD4
0	3.25001	0.302	0.13	0	OLI	SCD
0	0.27217	0.085	0.257	0	OLI	OTUB1
0	5.16034	0.185	0.013	0	OLI	PRR5L
0	0.307268	0.099	0.27	0	OLI	RAP1A
0	5.47775	0.191	0.02	0	OLI	ENSMFAG00000046645
0	2.58926	0.262	0.091	0	OLI	ENSMFAG00000043430
0	3.48957	0.232	0.061	0	OLI	NINJ2
0	0.352061	0.1	0.271	0	OLI	PHPT1
0	0.271543	0.076	0.247	0	OLI	DMAC2L
0	0.307077	0.083	0.254	0	OLI	GTF3C3
0	0.820849	0.673	0.844	0	OLI	DDX17
0	0.391561	0.093	0.263	0	OLI	LIN54
0	0.348987	0.089	0.259	0	OLI	RBM39
0	0.39018	0.081	0.251	0	OLI	WDTC1
0	0.344981	0.079	0.249	0	OLI	MTMR4
0	2.33906	0.864	0.695	0	OLI	GARNL3
0	0.349403	0.082	0.251	0	OLI	PAIP1
0	0.399727	0.091	0.259	0	OLI	ZBTB40
0	0.304334	0.081	0.249	0	OLI	ENSMFAG00000036680
0	0.294051	0.079	0.247	0	OLI	PHRF1
0	4.03374	0.241	0.073	0	OLI	MYH7B
0	2.94979	0.723	0.555	0	OLI	ZDHHC20
0	2.76138	0.914	0.748	0	OLI	SH3GL3
0	0.454632	0.094	0.26	0	OLI	RSPRY1
0	0.392276	0.094	0.259	0	OLI	STARD7
0	1.52291	0.593	0.428	0	OLI	MEIS2
0	1.3095	0.721	0.556	0	OLI	SLC9A9
0	0.375555	0.088	0.252	0	OLI	GSTCD
0	0.30667	0.077	0.241	0	OLI	PLOD2
0	0.27529	0.081	0.245	0	OLI	SQLE
0	0.445465	0.09	0.253	0	OLI	MEAF6
0	0.373183	0.088	0.251	0	OLI	ZBTB1
0	0.299663	0.074	0.237	0	OLI	SNRNP40
0	0.30933	0.079	0.242	0	OLI	PIGB
0	0.281432	0.073	0.236	0	OLI	APIP
0	0.376838	0.086	0.248	0	OLI	LETMD1
0	0.32976	0.083	0.245	0	OLI	ATP5PF
0	0.309944	0.076	0.238	0	OLI	UPF3B
0	0.334278	0.076	0.238	0	OLI	PHF2
0	0.293195	0.071	0.232	0	OLI	HIKESHI
0	0.452791	0.089	0.25	0	OLI	GBA2
0	0.266503	0.076	0.237	0	OLI	PSMD13
0	2.64089	0.235	0.074	0	OLI	PMP22
0	0.433818	0.083	0.244	0	OLI	PSMD3
0	0.365924	0.076	0.237	0	OLI	HEXD
0	0.261202	0.089	0.249	0	OLI	ZNF789
0	0.430645	0.08	0.24	0	OLI	CCDC112
0	0.275508	0.085	0.244	0	OLI	ANXA5
0	0.271049	0.069	0.227	0	OLI	PAXIP1
0	0.34104	0.079	0.237	0	OLI	DPY19L4
0	0.888956	0.685	0.843	0	OLI	FTO
0	0.254277	0.077	0.234	0	OLI	PHAX
0	0.380709	0.075	0.232	0	OLI	XPNPEP3
0	2.84939	0.253	0.096	0	OLI	GPRC5B
0	0.291366	0.07	0.227	0	OLI	ENSMFAG00000001258
0	0.393142	0.077	0.233	0	OLI	PIK3R4
0	3.35372	0.202	0.046	0	OLI	TFEB
0	4.14304	0.184	0.028	0	OLI	NDE1
0	2.63719	0.404	0.249	0	OLI	FOXN2
0	0.29115	0.068	0.223	0	OLI	ELMO2
0	2.52288	0.825	0.67	0	OLI	FNBP1
0	0.395564	0.073	0.227	0	OLI	EIF3J
0	0.362625	0.077	0.231	0	OLI	ZNF44
0	2.93248	0.399	0.247	0	OLI	CLDND1
0	0.292215	0.076	0.228	0	OLI	NDUFA7
0	3.74592	0.186	0.034	0	OLI	PDLIM3
0	0.371972	0.07	0.222	0	OLI	ENSMFAG00000035835
0	1.12317	0.588	0.739	0	OLI	HNRNPA2B1
0	0.293202	0.072	0.223	0	OLI	ENSMFAG00000031629
0	4.34427	0.178	0.027	0	OLI	CA2
0	0.357546	0.072	0.221	0	OLI	TRAPPC2
0	0.302995	0.07	0.219	0	OLI	ENSMFAG00000040941
0	0.323098	0.068	0.217	0	OLI	ENSMFAG00000030531
0	0.277551	0.063	0.212	0	OLI	ZNF26
0	0.268388	0.061	0.21	0	OLI	HSPA14
0	0.312141	0.069	0.218	0	OLI	ZNF606
0	0.407054	0.07	0.218	0	OLI	ENSMFAG00000032258
0	0.314224	0.065	0.213	0	OLI	DOT1L
0	3.32446	0.193	0.046	0	OLI	LPCAT2
0	2.25389	0.373	0.226	0	OLI	MITF
0	2.24831	0.966	0.82	0	OLI	FRMD5
0	3.81322	0.234	0.089	0	OLI	SLC7A9
0	0.28827	0.063	0.208	0	OLI	UBE2J2
0	3.82378	0.186	0.041	0	OLI	RTKN
0	2.23897	0.305	0.16	0	OLI	PLEKHH2
0	0.321101	0.067	0.211	0	OLI	ENY2
0	2.77142	0.596	0.452	0	OLI	ENSMFAG00000003875
0	3.83589	0.168	0.025	0	OLI	CYP2J2
0	0.265737	0.06	0.203	0	OLI	FAM151B
0	3.67056	0.232	0.089	0	OLI	CAVIN4
0	0.973151	0.839	0.697	0	OLI	PTPRK
0	2.02732	0.252	0.11	0	OLI	BNC2
0	1.0007	0.691	0.833	0	OLI	ZNF638
0	3.49007	0.208	0.066	0	OLI	CNP
0	1.71725	0.481	0.339	0	OLI	SASH1
0	0.351657	0.706	0.847	0	OLI	TNIK
0	0.25959	0.059	0.199	0	OLI	MRPL22
0	3.04323	0.416	0.277	0	OLI	POLR2F
0	3.30742	0.232	0.094	0	OLI	SLC2A12
0	1.67208	0.267	0.129	0	OLI	ACACB
0	2.84605	0.318	0.18	0	OLI	PLA2G16
0	5.61164	0.154	0.016	0	OLI	ACP7
0	6.68883	0.143	0.005	0	OLI	CLCA2
0	0.251989	0.057	0.194	0	OLI	VCPKMT
0	3.44286	0.195	0.058	0	OLI	CD9
0	1.16513	0.645	0.78	0	OLI	FNIP1
0	5.31213	0.152	0.017	0	OLI	MUSK
0	2.74049	0.666	0.531	0	OLI	PALM2
0	0.88254	0.686	0.82	0	OLI	DIP2C
0	4.57161	0.154	0.021	0	OLI	ENSMFAG00000042071
0	2.762	0.908	0.776	0	OLI	ENSMFAG00000045134
0	3.50993	0.174	0.043	0	OLI	GATM
0	2.61583	0.252	0.122	0	OLI	MCUB
0	2.93261	0.406	0.276	0	OLI	KCNK10
0	3.46266	0.177	0.047	0	OLI	PLXNB3
0	2.5048	0.654	0.527	0	OLI	CLDN11
0	3.32812	0.224	0.097	0	OLI	PCYT1B
0	1.1901	0.613	0.74	0	OLI	DPYSL2
0	3.72589	0.151	0.025	0	OLI	ENSMFAG00000000700
0	1.15254	0.849	0.724	0	OLI	KIRREL3
0	2.65318	0.565	0.441	0	OLI	LANCL1
0	2.59342	0.266	0.143	0	OLI	CRYBG3
0	1.70441	0.464	0.341	0	OLI	PREX1
0	3.32558	0.239	0.116	0	OLI	KIF6
0	2.50396	0.321	0.199	0	OLI	LDLRAD3
0	3.2796	0.245	0.124	0	OLI	TRIM36
0	2.82274	0.36	0.24	0	OLI	ENO4
0	2.73254	0.419	0.3	0	OLI	RYBP
0	4.9775	0.128	0.01	0	OLI	CHST3
0	2.33387	0.248	0.13	0	OLI	TBL1X
0	2.32633	0.275	0.158	0	OLI	ZHX2
0	3.67312	0.167	0.05	0	OLI	DAPK2
0	3.76478	0.174	0.057	0	OLI	SLC6A9
0	2.03621	0.306	0.189	0	OLI	DENND2A
0	1.85192	0.333	0.218	0	OLI	KAT2B
0	4.22543	0.159	0.044	0	OLI	AFMID
0	2.29871	0.185	0.071	0	OLI	S100B
0	2.44067	0.475	0.361	0	OLI	WWP1
0	3.8912	0.141	0.03	0	OLI	SYNE3
0	2.28978	0.261	0.151	0	OLI	ATP10B
0	1.62872	0.316	0.207	0	OLI	ZFHX4
0	3.48409	0.166	0.057	0	OLI	ENOSF1
0	2.50383	0.19	0.081	0	OLI	CECR2
0	2.6673	0.421	0.312	0	OLI	CCP110
0	1.71886	0.457	0.349	0	OLI	SEMA5A
0	1.28291	0.613	0.505	0	OLI	ITPR2
0	3.11815	0.225	0.118	0	OLI	RFFL
0	5.35514	0.121	0.014	0	OLI	ENSMFAG00000001040
0	2.62231	0.39	0.285	0	OLI	OTUD7B
0	1.28363	0.634	0.739	0	OLI	TJP1
0	4.12992	0.128	0.024	0	OLI	TRPM1
0	2.84921	0.157	0.053	0	OLI	BCO2
0	1.7398	0.885	0.781	0	OLI	PEX5L
0	5.03106	0.113	0.01	0	OLI	KLK6
0	2.91511	0.168	0.066	0	OLI	SFRP1
0	3.16263	0.22	0.12	0	OLI	TRPM6
0	2.37027	0.715	0.615	0	OLI	CDK8
0	2.31761	0.172	0.073	0	OLI	ENSMFAG00000001435
0	4.03277	0.127	0.029	0	OLI	TREH
0	0.722553	0.962	0.864	0	OLI	NKAIN2
0	2.95627	0.296	0.199	0	OLI	CEP85
0	1.31028	0.583	0.678	0	OLI	PHACTR3
0	2.08083	0.183	0.088	0	OLI	ELF1
0	2.71865	0.303	0.209	0	OLI	DPYSL5
0	1.1329	0.61	0.704	0	OLI	MAST4
0	1.91541	0.916	0.823	0	OLI	DLG1
0	3.84947	0.14	0.047	0	OLI	GALNT6
0	2.47608	0.313	0.22	0	OLI	STXBP3
0	1.47783	0.622	0.715	0	OLI	MAPRE2
0	2.31721	0.142	0.05	0	OLI	WIPF1
0	0.931973	0.729	0.821	0	OLI	ZSWIM6
0	1.501	0.659	0.75	0	OLI	CEP170
0	1.34339	0.636	0.727	0	OLI	NFASC
0	2.32103	0.808	0.718	0	OLI	TTLL7
0	2.99377	0.228	0.138	0	OLI	PIGT
0	1.86703	0.604	0.514	0	OLI	SGK1
0	2.36834	0.412	0.322	0	OLI	SAMD5
0	3.71004	0.114	0.026	0	OLI	OLAH
0	2.22875	0.296	0.208	0	OLI	NFE2L2
0	1.63614	0.983	0.895	0	OLI	IL1RAPL1
0	2.21018	0.369	0.281	0	OLI	KIAA1958
0	2.13391	0.936	0.849	0	OLI	DNM3
0	3.3834	0.107	0.02	0	OLI	RASSF2
0	3.82654	0.12	0.034	0	OLI	BOK
0	1.60857	0.512	0.597	0	OLI	NEO1
0	1.20411	0.686	0.771	0	OLI	GPM6B
0	4.14792	0.113	0.029	0	OLI	BTBD16
0	0.61715	0.839	0.922	0	OLI	APP
0	2.7017	0.12	0.038	0	OLI	PHGDH
0	3.12396	0.147	0.065	0	OLI	TIMP2
0	0.721081	0.777	0.858	0	OLI	LIMCH1
0	2.71272	0.134	0.055	0	OLI	EYA1
0	3.61844	0.119	0.04	0	OLI	SPSB1
0	0.79135	0.73	0.808	0	OLI	CADM1
0	2.21999	0.843	0.765	0	OLI	TRIM2
0	1.2858	0.755	0.831	0	OLI	CCDC88A
0	1.64936	0.921	0.847	0	OLI	PTPRD
0	2.63094	0.389	0.315	0	OLI	KLHL4
0	2.0477	0.94	0.866	0	OLI	ZEB2
0	1.40883	0.7	0.772	0	OLI	TNKS
0	0.896743	0.85	0.921	0	OLI	RERE
0	1.29545	0.723	0.794	0	OLI	MYO5A
0	2.29745	0.557	0.486	0	OLI	PPP1R16B
0	2.39261	0.48	0.409	0	OLI	RIF1
0	2.37588	0.966	0.895	0	OLI	SIK3
0	1.69862	0.65	0.58	0	OLI	GAB2
0	1.37767	0.616	0.685	0	OLI	PICALM
0	2.4998	0.349	0.28	0	OLI	SYNJ2
0	1.51465	0.652	0.721	0	OLI	OSBPL1A
0	1.05752	0.779	0.846	0	OLI	PTK2
0	1.51956	0.674	0.741	0	OLI	ZCCHC7
0	1.87689	0.788	0.722	0	OLI	PSD3
0	2.18315	0.63	0.565	0	OLI	SORT1
0	1.84343	0.887	0.822	0	OLI	WWOX
0	2.41551	0.493	0.428	0	OLI	SLC12A2
0	1.12828	0.673	0.61	0	OLI	NFIA
0	1.96785	0.905	0.843	0	OLI	FMNL2
0	1.93582	0.824	0.762	0	OLI	MAP7
0	1.5435	0.617	0.677	0	OLI	DOCK9
0	0.912833	0.841	0.899	0	OLI	CDC42BPA
0	1.59368	0.652	0.71	0	OLI	RICTOR
0	1.2189	0.951	0.895	0	OLI	ANK3
0	1.95497	0.841	0.787	0	OLI	C9orf3
0	1.91158	0.939	0.885	0	OLI	EXOC6B
0	2.28632	0.454	0.401	0	OLI	PXK
0	1.6173	0.494	0.546	0	OLI	STK39
0	1.44761	0.564	0.615	0	OLI	SCD5
0	1.19126	0.57	0.619	0	OLI	TMTC1
0	2.02829	0.552	0.504	0	OLI	SH3D19
0	1.12757	0.571	0.619	0	OLI	MYO1D
0	1.93111	0.733	0.685	0	OLI	UNC5C
0	1.4626	0.575	0.622	0	OLI	HSP90AA1
0	1.04655	0.864	0.911	0	OLI	DST
0	1.54691	0.752	0.705	0	OLI	DSCAML1
0	1.8793	0.452	0.407	0	OLI	EPS15
0	1.49152	0.749	0.792	0	OLI	ENSMFAG00000003384
0	1.51014	0.715	0.672	0	OLI	COBL
0	2.35129	0.643	0.601	0	OLI	MAN2A1
0	1.50266	0.627	0.669	0	OLI	GAS7
0	2.20757	0.432	0.39	0	OLI	APLP1
0	1.30546	0.909	0.869	0	OLI	NCAM2
0	1.76491	0.586	0.626	0	OLI	SECISBP2L
0	1.63786	0.747	0.787	0	OLI	GNAO1
0	1.17759	0.697	0.736	0	OLI	MBNL2
0	1.58473	0.845	0.806	0	OLI	ATP8A1
0	1.65857	0.679	0.718	0	OLI	KDM6A
0	1.90431	0.676	0.638	0	OLI	SLCO3A1
0	1.82198	0.936	0.899	0	OLI	RTN4
0	2.22694	0.582	0.545	0	OLI	FUT8
0	1.33057	0.991	0.956	0	OLI	MAGI2
0	2.09791	0.955	0.92	0	OLI	PPP2R2B
0	0.656842	0.723	0.756	0	OLI	RAPGEF5
0	0.37723	0.961	0.993	0	OLI	SLC24A3
0	2.11015	0.42	0.388	0	OLI	ST3GAL6
0	1.29781	0.84	0.871	0	OLI	ARHGAP21
0	1.61699	0.592	0.621	0	OLI	CTTNBP2
0	2.33173	0.404	0.375	0	OLI	MTMR2
0	1.69498	0.734	0.762	0	OLI	WNK1
0	1.41588	0.761	0.788	0	OLI	MAP4K4
0	1.83628	0.506	0.48	0	OLI	IGSF11
0	1.28997	0.444	0.418	0	OLI	ARHGAP22
0	1.85479	0.594	0.619	0	OLI	APBB2
0	0.878283	0.998	0.973	0	OLI	PCDH9
0	1.24022	0.874	0.851	0	OLI	AGAP1
0	2.01283	0.578	0.556	0	OLI	DENND5A
0	1.37434	0.74	0.719	0	OLI	DOCK4
0	1.76421	0.542	0.563	0	OLI	SLC22A23
0	1.85328	0.612	0.632	0	OLI	ZFYVE16
0	1.7673	0.699	0.717	0	OLI	ZDHHC14
0	2.15156	0.58	0.563	0	OLI	LPGAT1
0	1.79154	0.703	0.72	0	OLI	MAP4K5
0	1.8143	0.769	0.752	0	OLI	WSB1
0	1.69534	0.73	0.745	0	OLI	DNAJC6
0	1.90172	0.548	0.563	0	OLI	RNF13
0	1.2478	0.89	0.902	0	OLI	NCAM1
0	1.93083	0.568	0.58	0	OLI	CLIP4
0	1.99288	0.535	0.524	0	OLI	MVB12B
0	1.38918	0.668	0.657	0	OLI	SNX29
0	2.04613	0.434	0.425	0	OLI	FARP2
0	1.67551	0.767	0.775	0	OLI	AIG1
0	1.85913	0.706	0.699	0	OLI	PTBP2
0	1.84073	0.659	0.666	0	OLI	ANKRD28
0	1.59582	0.856	0.85	0	OLI	KIF1B
0	1.42019	0.914	0.91	0	OLI	CLASP2
6.77767e-308	0.293827	0.082	0.237	1.14231e-303	OLI	PHF10
8.32563e-308	0.412715	0.126	0.314	1.4032e-303	OLI	SERBP1
1.47306e-307	0.29824	0.106	0.278	2.4827e-303	OLI	UBE2E1
1.70476e-307	0.253258	0.052	0.185	2.87321e-303	OLI	SLC35B3
3.72061e-307	0.36564	0.104	0.274	6.27071e-303	OLI	NAA20
5.82907e-307	0.393555	0.19	0.427	9.82431e-303	OLI	CANX
6.29993e-307	0.57195	0.147	0.354	1.06179e-302	OLI	DTWD1
7.15653e-307	0.555995	0.177	0.408	1.20616e-302	OLI	ILKAP
1.43009e-306	0.309323	0.082	0.237	2.41027e-302	OLI	ENSMFAG00000036411
1.6633e-306	0.35376	0.064	0.206	2.80332e-302	OLI	YTHDF2
4.5352e-306	0.458582	0.105	0.278	7.64362e-302	OLI	RBBP4
7.55513e-306	0.484107	0.121	0.304	1.27334e-301	OLI	ENSMFAG00000038822
1.37609e-305	0.582641	0.116	0.297	2.31926e-301	OLI	GET4
2.39617e-305	0.308309	0.06	0.197	4.0385e-301	OLI	FN3KRP
2.26427e-304	0.384719	0.086	0.244	3.8162e-300	OLI	BCLAF3
2.68054e-304	0.516106	0.217	0.482	4.51779e-300	OLI	WAPL
4.34205e-304	0.297288	0.185	0.412	7.31809e-300	OLI	RNASEK
5.84632e-304	0.259147	0.067	0.209	9.85338e-300	OLI	BCAS2
1.45504e-303	0.544202	0.083	0.238	2.45232e-299	OLI	SCAMP5
3.38647e-303	1.76955	0.477	0.517	5.70755e-299	OLI	SMURF1
9.13159e-303	2.15823	0.406	0.383	1.53904e-298	OLI	PSEN1
9.25323e-303	0.316772	0.065	0.206	1.55954e-298	OLI	KAT14
2.19769e-302	0.333643	0.064	0.205	3.70399e-298	OLI	RABEPK
6.01165e-302	0.501136	0.108	0.281	1.0132e-297	OLI	RNF170
8.49425e-302	0.294154	0.053	0.185	1.43162e-297	OLI	FAM98A
1.19423e-301	0.332649	0.122	0.303	2.01276e-297	OLI	HSPA5
1.36403e-301	0.472605	0.091	0.25	2.29894e-297	OLI	DESI2
3.2148e-301	0.437498	0.139	0.334	5.41822e-297	OLI	AP2M1
4.87121e-301	0.424468	0.096	0.259	8.20994e-297	OLI	ZXDC
7.87724e-301	0.503268	0.208	0.462	1.32763e-296	OLI	CAPZA1
1.21555e-300	0.326996	0.074	0.221	2.04868e-296	OLI	ZNF143
3.35802e-300	0.371638	0.088	0.245	5.65961e-296	OLI	TXNL4A
3.44844e-300	2.74818	0.255	0.169	5.812e-296	OLI	PIK3C2B
6.92046e-300	0.391672	0.275	0.593	1.16637e-295	OLI	MGA
9.07353e-300	0.514279	0.235	0.516	1.52925e-295	OLI	ENSMFAG00000039865
1.1319e-299	0.254466	0.057	0.191	1.9077e-295	OLI	WIPI2
3.45981e-299	0.534166	0.199	0.445	5.83116e-295	OLI	CNOT1
3.72513e-299	0.585311	0.168	0.389	6.27834e-295	OLI	CASD1
4.22099e-299	0.399095	0.102	0.268	7.11405e-295	OLI	TRIR
5.31661e-299	0.439648	0.105	0.274	8.96062e-295	OLI	C1H1orf43
6.91161e-299	0.374109	0.087	0.243	1.16488e-294	OLI	CFAP97
1.34106e-298	0.407322	0.094	0.255	2.26023e-294	OLI	ATAT1
2.16514e-298	0.621492	0.187	0.424	3.64912e-294	OLI	WDR27
3.02782e-298	1.78897	0.458	0.473	5.10309e-294	OLI	REEP3
4.22036e-298	0.311474	0.127	0.31	7.113e-294	OLI	ENSMFAG00000002478
5.50091e-298	0.586633	0.123	0.307	9.27123e-294	OLI	CSE1L
9.18568e-298	0.436514	0.249	0.54	1.54815e-293	OLI	SENP7
1.2259e-296	0.654206	0.152	0.36	2.06613e-292	OLI	ZNF595
5.16326e-296	0.403358	0.095	0.256	8.70216e-292	OLI	DUT
6.69183e-296	0.560464	0.109	0.281	1.12784e-291	OLI	GINM1
7.30779e-296	0.564416	0.204	0.455	1.23165e-291	OLI	ENSMFAG00000039632
3.02321e-295	0.277629	0.062	0.199	5.09532e-291	OLI	ENSMFAG00000035880
3.05799e-295	0.460346	0.092	0.25	5.15394e-291	OLI	KIF21B
4.88922e-295	0.596992	0.116	0.294	8.2403e-291	OLI	SCCPDH
6.14727e-295	0.436118	0.066	0.207	1.03606e-290	OLI	PRKAA1
6.85678e-295	0.478663	0.083	0.234	1.15564e-290	OLI	ZNF879
9.47559e-295	0.460056	0.081	0.232	1.59702e-290	OLI	PAN2
3.01454e-294	0.252213	0.06	0.195	5.08071e-290	OLI	TAF12
3.34649e-294	0.593345	0.213	0.472	5.64017e-290	OLI	GMCL1
1.30165e-293	0.254149	0.048	0.174	2.19379e-289	OLI	C6H5orf22
1.70558e-293	0.651728	0.129	0.316	2.87459e-289	OLI	ENSMFAG00000044532
2.08332e-293	0.597612	0.117	0.296	3.51123e-289	OLI	PUM3
2.38956e-293	0.486659	0.133	0.32	4.02737e-289	OLI	ATG10
2.11654e-292	0.51421	0.105	0.274	3.56722e-288	OLI	WBP4
2.49518e-292	0.491601	0.272	0.584	4.20537e-288	OLI	EML5
2.77588e-292	0.496085	0.079	0.228	4.67847e-288	OLI	B9D1
3.00692e-292	0.423559	0.23	0.497	5.06787e-288	OLI	INPP5F
6.15038e-292	0.607459	0.146	0.347	1.03658e-287	OLI	TSC2
8.82497e-292	0.278568	0.297	0.625	1.48736e-287	OLI	FYN
1.54117e-291	0.337929	0.297	0.63	2.59749e-287	OLI	SREK1
1.89066e-291	0.517166	0.103	0.269	3.18652e-287	OLI	ENSMFAG00000044519
3.66981e-291	0.501321	0.193	0.428	6.1851e-287	OLI	DYNLRB1
3.88432e-291	0.484695	0.257	0.555	6.54664e-287	OLI	PPP3CC
4.97446e-290	0.317809	0.065	0.201	8.38395e-286	OLI	CUL4B
7.19333e-290	0.422628	0.16	0.365	1.21236e-285	OLI	NFATC3
1.03676e-289	0.374918	0.06	0.194	1.74736e-285	OLI	DDX55
1.41041e-289	0.284816	0.055	0.185	2.37711e-285	OLI	HAUS1
2.20933e-288	0.312855	0.064	0.201	3.72361e-284	OLI	TOR1AIP1
4.14607e-288	0.380219	0.072	0.213	6.98779e-284	OLI	ENSMFAG00000038062
4.43469e-288	0.586237	0.186	0.418	7.47422e-284	OLI	INPP5A
8.79855e-288	0.653306	0.144	0.342	1.48291e-283	OLI	ZFP14
2.0648e-287	0.355626	0.065	0.202	3.48001e-283	OLI	SMARCE1
2.18299e-287	0.591313	0.112	0.285	3.67921e-283	OLI	ENSMFAG00000039253
2.53033e-287	0.441549	0.077	0.222	4.26461e-283	OLI	VPS26A
5.65324e-287	0.34778	0.076	0.221	9.52797e-283	OLI	SH3GLB2
1.18032e-286	0.482371	0.13	0.314	1.98931e-282	OLI	TMEM59
1.54849e-286	0.353237	0.056	0.185	2.60983e-282	OLI	TAB3
2.29944e-286	0.317723	0.071	0.211	3.87547e-282	OLI	ENSMFAG00000036355
3.77862e-286	0.351006	0.058	0.189	6.36849e-282	OLI	CYP2U1
8.2916e-286	0.318742	0.067	0.205	1.39747e-281	OLI	SMIM7
1.12011e-285	0.490246	0.09	0.244	1.88784e-281	OLI	GNPAT
1.46421e-285	2.47186	0.292	0.214	2.46778e-281	OLI	NPC1
2.44846e-285	0.57842	0.122	0.301	4.12663e-281	OLI	IWS1
3.0019e-285	1.92805	0.394	0.355	5.0594e-281	OLI	GRM3
1.97199e-284	0.44819	0.111	0.279	3.3236e-280	OLI	ENSMFAG00000040003
2.22217e-284	0.560262	0.205	0.452	3.74524e-280	OLI	POLK
5.09719e-284	0.439391	0.091	0.246	8.59081e-280	OLI	MTIF3
5.34304e-284	0.638542	0.097	0.257	9.00515e-280	OLI	TTL
6.57442e-284	0.418364	0.202	0.443	1.10805e-279	OLI	SEC14L1
8.24841e-284	0.544385	0.124	0.303	1.39019e-279	OLI	PCF11
1.06183e-283	0.456171	0.27	0.576	1.7896e-279	OLI	ARMH3
2.18529e-283	0.291883	0.067	0.204	3.68309e-279	OLI	FDX1
2.37483e-283	0.593006	0.092	0.248	4.00254e-279	OLI	INTS7
3.70457e-283	0.458648	0.112	0.28	6.24368e-279	OLI	ZC3H12C
4.23277e-283	0.476916	0.093	0.248	7.13391e-279	OLI	NSA2
4.33718e-283	0.431777	0.068	0.205	7.30988e-279	OLI	ZNF383
6.07369e-283	0.588222	0.109	0.276	1.02366e-278	OLI	CREBRF
6.65529e-283	0.267689	0.315	0.66	1.12168e-278	OLI	PKN2
1.1171e-282	0.346011	0.094	0.25	1.88276e-278	OLI	ENSMFAG00000004020
1.7773e-282	0.579288	0.11	0.277	2.99547e-278	OLI	PEX7
9.73767e-282	0.35521	0.076	0.219	1.64119e-277	OLI	ISCU
1.35578e-281	0.339387	0.073	0.213	2.28504e-277	OLI	ENSMFAG00000039838
1.43445e-281	2.64416	0.269	0.188	2.41761e-277	OLI	CPPED1
1.85974e-281	0.963973	0.604	0.782	3.1344e-277	OLI	KDM4C
3.20378e-281	0.373458	0.26	0.55	5.39965e-277	OLI	FAIM2
5.63109e-281	0.446236	0.115	0.286	9.49064e-277	OLI	UCKL1
1.08695e-280	0.280405	0.07	0.207	1.83195e-276	OLI	COMMD3
1.18272e-280	0.27359	0.052	0.176	1.99335e-276	OLI	ECI2
5.04691e-280	3.3188	0.135	0.06	8.50606e-276	OLI	C21orf91
5.48806e-280	0.491785	0.082	0.229	9.24958e-276	OLI	RRNAD1
6.30271e-280	0.301453	0.059	0.189	1.06226e-275	OLI	C10orf88
6.61323e-280	0.319516	0.064	0.198	1.11459e-275	OLI	RNF20
8.15467e-280	0.251181	0.063	0.196	1.37439e-275	OLI	ITGB1
1.43132e-279	0.345154	0.279	0.586	2.41235e-275	OLI	SMARCC1
4.18224e-279	0.599862	0.115	0.286	7.04874e-275	OLI	COLGALT2
5.6669e-279	3.56446	0.115	0.047	9.55099e-275	OLI	ENSMFAG00000047144
6.63754e-279	0.492803	0.255	0.545	1.11869e-274	OLI	BOD1L1
8.92015e-279	0.403339	0.09	0.242	1.5034e-274	OLI	VDAC2
1.99979e-278	0.398156	0.182	0.398	3.37044e-274	OLI	NME1-NME2
4.20289e-278	1.56993	0.502	0.594	7.08355e-274	OLI	SRCIN1
6.28272e-278	0.545887	0.087	0.236	1.05889e-273	OLI	PNPLA6
7.95462e-278	0.299121	0.064	0.196	1.34067e-273	OLI	ENSMFAG00000033000
9.96544e-278	0.496536	0.074	0.215	1.67958e-273	OLI	MTERF1
3.74753e-277	0.254347	0.048	0.169	6.31609e-273	OLI	TCOF1
4.19785e-277	0.512853	0.113	0.281	7.07505e-273	OLI	SIRT1
9.18477e-277	0.496705	0.251	0.537	1.548e-272	OLI	RNF38
1.14492e-276	0.536931	0.108	0.272	1.92966e-272	OLI	ADGRF3
1.44304e-276	0.481702	0.074	0.213	2.43211e-272	OLI	TOR1AIP2
2.2372e-276	0.328189	0.052	0.176	3.77058e-272	OLI	ZW10
5.80494e-276	0.466189	0.08	0.224	9.78365e-272	OLI	MTIF2
1.74365e-275	0.348454	0.065	0.198	2.93874e-271	OLI	ENSMFAG00000033366
2.36293e-275	0.336349	0.065	0.197	3.98248e-271	OLI	IPP
2.40219e-275	0.384781	0.146	0.336	4.04865e-271	OLI	SLC25A3
3.5024e-275	0.58238	0.223	0.479	5.90294e-271	OLI	TAF3
4.21569e-275	0.372323	0.05	0.172	7.10513e-271	OLI	DFFB
6.35006e-275	0.445408	0.071	0.208	1.07024e-270	OLI	MAP2K7
7.75948e-275	0.335124	0.16	0.357	1.30778e-270	OLI	CTNNA1
8.42671e-275	0.548286	0.083	0.228	1.42024e-270	OLI	UBE3B
1.07873e-274	0.393534	0.086	0.233	1.81809e-270	OLI	SPCS3
1.11676e-274	0.297736	0.062	0.192	1.88219e-270	OLI	ERMARD
1.37741e-274	0.573769	0.109	0.273	2.32148e-270	OLI	TMEM41B
1.39844e-274	0.339805	0.08	0.222	2.35693e-270	OLI	ENSMFAG00000041014
1.98128e-274	0.618891	0.113	0.282	3.33924e-270	OLI	PI4KB
2.84937e-274	0.355735	0.066	0.198	4.80233e-270	OLI	TMEM68
3.18966e-274	0.364553	0.066	0.199	5.37586e-270	OLI	ENSMFAG00000037272
1.41013e-273	0.666013	0.208	0.457	2.37664e-269	OLI	ENSMFAG00000045863
3.3706e-273	0.407158	0.077	0.218	5.68081e-269	OLI	SDF4
5.26307e-273	0.314737	0.062	0.192	8.87038e-269	OLI	ZFYVE26
6.42896e-273	0.269493	0.045	0.162	1.08354e-268	OLI	ASB7
6.62286e-273	0.456303	0.071	0.207	1.11622e-268	OLI	ZNF487
7.33603e-273	1.53706	0.51	0.613	1.23641e-268	OLI	ANKIB1
9.69574e-273	0.283387	0.057	0.184	1.63412e-268	OLI	MCMBP
4.3876e-272	0.353034	0.064	0.195	7.39486e-268	OLI	EBAG9
4.79509e-272	0.403802	0.064	0.195	8.08165e-268	OLI	YIPF4
8.46466e-272	0.804562	0.626	0.795	1.42663e-267	OLI	SSH2
1.96689e-271	0.556458	0.127	0.303	3.31499e-267	OLI	PBLD
2.68324e-271	0.748013	0.185	0.411	4.52233e-267	OLI	LRP12
2.77997e-271	0.320549	0.064	0.194	4.68536e-267	OLI	KBTBD2
7.52211e-271	0.304651	0.056	0.181	1.26778e-266	OLI	NDUFV3
8.12965e-271	0.555393	0.11	0.275	1.37017e-266	OLI	NR2C1
2.10075e-270	0.323442	0.321	0.663	3.5406e-266	OLI	STOX2
2.69923e-270	0.283849	0.045	0.162	4.54929e-266	OLI	TTC4
3.30505e-270	0.525033	0.249	0.533	5.57033e-266	OLI	PPP4R2
3.44631e-270	0.380351	0.062	0.19	5.80842e-266	OLI	RRM1
6.70823e-270	0.308697	0.068	0.2	1.13061e-265	OLI	ENSMFAG00000034651
8.1967e-270	0.628801	0.154	0.351	1.38147e-265	OLI	RBX1
1.26291e-269	0.342702	0.063	0.192	2.12851e-265	OLI	MSH6
1.61885e-269	0.306847	0.101	0.256	2.72841e-265	OLI	SPATA6
1.8923e-269	0.383183	0.119	0.286	3.18928e-265	OLI	PARK7
2.76547e-269	0.657522	0.132	0.312	4.66092e-265	OLI	EXTL3
6.81329e-269	0.372212	0.057	0.181	1.14831e-264	OLI	SYAP1
8.61658e-269	0.273843	0.07	0.203	1.45224e-264	OLI	CRLF3
9.94695e-269	0.315196	0.301	0.629	1.67646e-264	OLI	MED27
2.30807e-268	0.535599	0.129	0.306	3.89003e-264	OLI	EIF4H
1.77609e-267	3.49456	0.123	0.053	2.99341e-263	OLI	LARP6
2.0549e-267	0.333326	0.059	0.185	3.46333e-263	OLI	ZNF280C
3.74857e-267	0.341106	0.054	0.176	6.31784e-263	OLI	NSUN3
3.84753e-267	0.490522	0.123	0.294	6.48463e-263	OLI	PEA15
1.3461e-266	0.255399	0.042	0.155	2.26871e-262	OLI	SNX16
2.71283e-266	0.516676	0.164	0.366	4.5722e-262	OLI	ZFAND5
2.73135e-266	0.700026	0.161	0.364	4.60341e-262	OLI	CLCN4
3.30915e-266	0.51753	0.254	0.541	5.57723e-262	OLI	FAR1
3.32494e-266	0.551443	0.105	0.264	5.60386e-262	OLI	SLC35A5
7.32549e-266	0.399394	0.078	0.216	1.23464e-261	OLI	POMP
1.166e-265	0.584701	0.179	0.394	1.96518e-261	OLI	AGPAT5
2.43938e-265	0.389829	0.28	0.582	4.11132e-261	OLI	AARS
2.56781e-265	0.401002	0.074	0.209	4.32778e-261	OLI	ENSMFAG00000035854
2.60843e-265	0.423532	0.278	0.584	4.39625e-261	OLI	PIK3CB
2.99421e-265	0.300086	0.053	0.175	5.04644e-261	OLI	GNPNAT1
3.9043e-265	0.474383	0.271	0.571	6.58031e-261	OLI	CDC73
4.14587e-265	0.618952	0.192	0.42	6.98745e-261	OLI	ENSMFAG00000003935
9.6642e-265	0.321464	0.083	0.224	1.62881e-260	OLI	ATF4
1.23543e-264	0.506285	0.082	0.223	2.08219e-260	OLI	GABPA
1.90411e-264	0.807825	0.641	0.832	3.20918e-260	OLI	ANKRD12
1.99389e-264	0.340707	0.074	0.21	3.3605e-260	OLI	STAT3
2.5596e-264	0.424333	0.056	0.18	4.31394e-260	OLI	CNEP1R1
2.84805e-264	0.331928	0.057	0.181	4.8001e-260	OLI	YIPF6
2.96766e-264	0.65514	0.18	0.397	5.00169e-260	OLI	SRRM1
3.28743e-264	0.600229	0.116	0.283	5.54064e-260	OLI	C1GALT1
4.46021e-264	0.684109	0.122	0.294	7.51724e-260	OLI	CYLD
7.26667e-264	0.459715	0.271	0.57	1.22472e-259	OLI	PHC3
8.90455e-264	0.279135	0.056	0.178	1.50077e-259	OLI	MRPL35
9.42267e-264	0.485576	0.267	0.56	1.5881e-259	OLI	ENAH
1.16537e-263	0.707426	0.142	0.329	1.96412e-259	OLI	MMS19
1.39234e-263	0.495548	0.065	0.195	2.34666e-259	OLI	MTMR9
1.71824e-263	0.434688	0.281	0.587	2.89593e-259	OLI	VWA8
6.47043e-263	0.290073	0.052	0.172	1.09053e-258	OLI	COPS7A
1.06549e-262	0.445293	0.29	0.607	1.79577e-258	OLI	MICU2
1.26957e-262	0.438354	0.069	0.2	2.13973e-258	OLI	USE1
2.24421e-262	0.556199	0.075	0.212	3.78239e-258	OLI	DNAJB4
2.40297e-262	0.450724	0.077	0.215	4.04997e-258	OLI	OSTM1
3.36981e-262	0.517931	0.242	0.509	5.67948e-258	OLI	PLPP1
4.05558e-262	0.282004	0.054	0.174	6.83528e-258	OLI	MALSU1
6.25194e-262	0.623741	0.186	0.406	1.0537e-257	OLI	CISD1
8.85835e-262	0.404497	0.099	0.25	1.49299e-257	OLI	RBMX
1.03124e-261	0.363135	0.293	0.611	1.73805e-257	OLI	HNRNPD
1.15331e-261	0.663005	0.099	0.252	1.94378e-257	OLI	RAD51C
1.62673e-261	0.259971	0.054	0.174	2.74168e-257	OLI	BIRC2
1.74876e-261	0.443185	0.071	0.204	2.94737e-257	OLI	COPS3
3.02737e-261	0.280525	0.072	0.205	5.10232e-257	OLI	SRSF9
5.68199e-261	0.359019	0.11	0.268	9.57642e-257	OLI	BLM
5.98441e-261	1.9833	0.402	0.386	1.00861e-256	OLI	SERINC5
6.21614e-261	0.274803	0.048	0.163	1.04767e-256	OLI	GATAD2B
6.97025e-261	0.477829	0.129	0.302	1.17477e-256	OLI	EIF5
3.10391e-260	0.411014	0.059	0.182	5.23133e-256	OLI	ZNF700
3.59119e-260	0.264259	0.335	0.689	6.05259e-256	OLI	KTN1
3.65096e-260	0.547038	0.114	0.276	6.15333e-256	OLI	PRDX3
5.0134e-260	0.474927	0.088	0.231	8.44959e-256	OLI	H2AFV
5.16851e-260	0.481326	0.085	0.227	8.71101e-256	OLI	STIP1
1.20854e-259	0.266827	0.06	0.184	2.03688e-255	OLI	KIAA1551
2.38628e-259	0.256949	0.067	0.196	4.02183e-255	OLI	REX1BD
2.85003e-259	0.327283	0.08	0.218	4.80343e-255	OLI	ENSMFAG00000036111
2.90315e-259	0.620212	0.18	0.394	4.89297e-255	OLI	SLK
3.41187e-259	0.280346	0.067	0.196	5.75037e-255	OLI	ENSMFAG00000045191
5.1587e-259	0.485989	0.074	0.208	8.69448e-255	OLI	CCDC59
6.18269e-259	0.410352	0.064	0.191	1.04203e-254	OLI	RAD52
1.33772e-258	0.386203	0.299	0.621	2.2546e-254	OLI	GNB1
1.46625e-258	0.41476	0.074	0.208	2.47122e-254	OLI	TRIM4
2.44261e-258	0.711232	0.188	0.409	4.11677e-254	OLI	LIN52
2.52877e-258	0.347692	0.068	0.196	4.262e-254	OLI	TMEM14A
2.90695e-258	0.596542	0.138	0.318	4.89938e-254	OLI	PPP2CA
3.3805e-258	0.643316	0.174	0.384	5.6975e-254	OLI	NSRP1
3.61933e-258	0.542287	0.13	0.303	6.10003e-254	OLI	GABARAPL1
9.07381e-258	1.85017	0.365	0.313	1.5293e-253	OLI	ITGAV
9.35842e-258	0.359042	0.06	0.184	1.57727e-253	OLI	BLMH
2.1638e-257	0.395754	0.069	0.199	3.64687e-253	OLI	ZNF16
1.05662e-256	0.467629	0.083	0.222	1.78082e-252	OLI	ATP6V1D
1.69521e-256	0.276867	0.058	0.18	2.85711e-252	OLI	C1orf123
2.06921e-256	0.412369	0.055	0.176	3.48745e-252	OLI	ZNF583
3.55603e-256	0.341105	0.078	0.214	5.99333e-252	OLI	ASB14
4.32496e-256	0.363657	0.056	0.177	7.28929e-252	OLI	SF3B2
4.84551e-256	0.615284	0.134	0.31	8.16662e-252	OLI	PPP1R10
7.08137e-256	0.286038	0.054	0.172	1.19349e-251	OLI	CNOT7
7.41642e-256	0.473114	0.055	0.175	1.24996e-251	OLI	ENSMFAG00000003479
8.65248e-256	0.280247	0.051	0.167	1.45829e-251	OLI	ZFP37
1.05746e-255	0.274598	0.101	0.251	1.78225e-251	OLI	ENSMFAG00000030186
1.21729e-255	0.568301	0.13	0.302	2.05162e-251	OLI	GLDN
1.7086e-255	0.408589	0.063	0.188	2.87968e-251	OLI	USPL1
2.45574e-255	0.34789	0.057	0.178	4.1389e-251	OLI	POMGNT1
4.14621e-255	0.267738	0.044	0.156	6.98802e-251	OLI	WDR61
5.16036e-255	0.515267	0.07	0.201	8.69727e-251	OLI	BCAT2
7.35688e-255	0.692969	0.177	0.389	1.23993e-250	OLI	TRAPPC13
2.44184e-254	0.684945	0.213	0.458	4.11547e-250	OLI	ENSMFAG00000001217
2.6469e-254	0.551072	0.08	0.217	4.46109e-250	OLI	STAMBP
4.53455e-254	0.884031	0.213	0.458	7.64253e-250	OLI	CAST
1.34893e-253	2.37748	0.225	0.143	2.27348e-249	OLI	GPSM2
1.38537e-253	0.315801	0.046	0.158	2.3349e-249	OLI	THOP1
1.53919e-253	0.53581	0.14	0.318	2.59414e-249	OLI	RAC1
1.63093e-253	0.37406	0.307	0.639	2.74876e-249	OLI	AMBRA1
1.78188e-253	0.292626	0.062	0.186	3.00318e-249	OLI	ZNF808
2.77671e-253	0.628092	0.173	0.379	4.67986e-249	OLI	CLK1
4.11385e-253	0.359252	0.25	0.51	6.93349e-249	OLI	EIF1
4.47828e-253	0.41936	0.064	0.189	7.54769e-249	OLI	TEX10
7.04455e-253	0.618122	0.12	0.285	1.18729e-248	OLI	SHLD1
8.88555e-253	0.615404	0.103	0.255	1.49757e-248	OLI	SEH1L
4.1575e-252	0.475235	0.165	0.361	7.00705e-248	OLI	TUBB
4.7026e-252	0.380345	0.049	0.163	7.92577e-248	OLI	MBLAC2
6.85215e-252	0.592287	0.192	0.413	1.15486e-247	OLI	VAPA
7.13698e-252	0.327434	0.066	0.191	1.20287e-247	OLI	TDRP
9.79938e-252	0.529993	0.07	0.198	1.65159e-247	OLI	TYW5
1.13241e-251	2.94169	0.199	0.12	1.90856e-247	OLI	TMCC2
1.80285e-251	0.333357	0.065	0.19	3.03852e-247	OLI	TCP1
3.65257e-251	0.29104	0.313	0.638	6.15605e-247	OLI	TAB2
4.0181e-251	0.347337	0.077	0.209	6.77211e-247	OLI	ABHD17A
4.94636e-251	0.474028	0.101	0.251	8.3366e-247	OLI	PFDN2
5.31925e-251	0.47814	0.165	0.361	8.96507e-247	OLI	GDI1
6.69878e-251	0.343713	0.144	0.321	1.12901e-246	OLI	ATP6V0B
8.21303e-251	0.527485	0.266	0.557	1.38422e-246	OLI	TBC1D23
1.59564e-250	0.286394	0.057	0.175	2.68929e-246	OLI	EXOC3
1.78434e-250	0.33567	0.055	0.173	3.00733e-246	OLI	USF3
2.48244e-250	0.481042	0.063	0.187	4.18391e-246	OLI	POMT2
3.19074e-250	0.553233	0.147	0.33	5.37767e-246	OLI	TGOLN2
4.77798e-250	0.626332	0.168	0.368	8.0528e-246	OLI	SEL1L
4.81133e-249	0.590434	0.196	0.414	8.10901e-245	OLI	SUGCT
4.95898e-249	0.529938	0.242	0.506	8.35787e-245	OLI	FUS
5.19866e-249	1.87207	0.434	0.458	8.76183e-245	OLI	PPP1R21
5.36119e-249	0.751413	0.128	0.298	9.03575e-245	OLI	SP4
1.32723e-248	0.670402	0.115	0.276	2.23692e-244	OLI	FBXO25
7.33243e-248	0.489283	0.075	0.206	1.23581e-243	OLI	FAM76B
2.40943e-247	0.415304	0.062	0.183	4.06086e-243	OLI	ENSMFAG00000032050
2.41138e-247	0.413151	0.059	0.178	4.06415e-243	OLI	LSS
1.00931e-246	0.274466	0.072	0.2	1.70109e-242	OLI	CYC1
1.43981e-246	0.37231	0.057	0.174	2.42666e-242	OLI	ING5
1.91519e-246	0.686423	0.137	0.312	3.22786e-242	OLI	MED14
2.01745e-246	0.429399	0.062	0.184	3.40021e-242	OLI	AZI2
2.22027e-246	0.544366	0.189	0.402	3.74204e-242	OLI	PFN2
2.51237e-246	0.760386	0.11	0.267	4.23435e-242	OLI	ENSMFAG00000036667
5.30755e-246	0.301002	0.075	0.204	8.94535e-242	OLI	ENSMFAG00000000594
5.69847e-246	0.522831	0.263	0.545	9.6042e-242	OLI	TAOK3
1.1859e-245	0.704438	0.161	0.355	1.99872e-241	OLI	KPNA4
1.8144e-245	0.643311	0.129	0.299	3.05798e-241	OLI	IP6K2
2.4698e-245	0.336821	0.107	0.257	4.16259e-241	OLI	ENSMFAG00000014721
2.88865e-245	0.528683	0.095	0.24	4.86853e-241	OLI	TMLHE
3.25733e-245	0.549726	0.242	0.507	5.48991e-241	OLI	CHIC1
3.31305e-245	0.266866	0.043	0.15	5.58382e-241	OLI	MIS18A
4.19831e-245	0.328398	0.046	0.155	7.07584e-241	OLI	ITGB3BP
6.1807e-245	0.332947	0.075	0.205	1.04169e-240	OLI	ZNF428
1.43267e-244	0.724289	0.66	0.743	2.41461e-240	OLI	TMEFF2
1.447e-244	0.360251	0.052	0.166	2.43877e-240	OLI	BROX
1.4809e-244	0.608712	0.24	0.504	2.49592e-240	OLI	NUP214
1.81238e-244	0.51463	0.088	0.227	3.05459e-240	OLI	ZC3H4
2.05264e-244	0.458376	0.063	0.185	3.45951e-240	OLI	TARS2
2.24438e-244	0.437889	0.059	0.178	3.78267e-240	OLI	RECQL
2.28323e-244	0.665652	0.1	0.248	3.84815e-240	OLI	ENSMFAG00000001552
2.34302e-244	0.448173	0.079	0.212	3.94893e-240	OLI	TARS
5.42736e-244	0.416685	0.304	0.628	9.14728e-240	OLI	AFF4
5.46662e-244	0.505306	0.078	0.21	9.21345e-240	OLI	CDC37
6.94971e-244	0.410425	0.075	0.205	1.1713e-239	OLI	TMED2
8.28582e-244	0.405446	0.061	0.181	1.39649e-239	OLI	STRN4
1.27924e-243	0.430241	0.053	0.167	2.15604e-239	OLI	ZNF189
2.15734e-243	0.447949	0.109	0.26	3.63598e-239	OLI	ENSMFAG00000042962
3.17736e-243	0.722381	0.659	0.77	5.35512e-239	OLI	EPB41L2
3.23989e-243	0.344734	0.291	0.595	5.46051e-239	OLI	PLEKHA1
3.49147e-243	0.445165	0.056	0.172	5.88452e-239	OLI	PSMD11
3.69041e-243	0.462142	0.086	0.222	6.21982e-239	OLI	UNK
7.99882e-243	2.1873	0.373	0.349	1.34812e-238	OLI	SCARB2
1.20242e-242	2.1267	0.344	0.297	2.02656e-238	OLI	TMTC4
1.55083e-242	2.05788	0.148	0.073	2.61377e-238	OLI	PROX1
1.55353e-242	0.444521	0.053	0.166	2.61832e-238	OLI	SNAPC1
2.00967e-242	0.479861	0.056	0.172	3.38709e-238	OLI	ZNF140
2.22797e-242	0.373057	0.077	0.206	3.75501e-238	OLI	ENSMFAG00000030959
4.38393e-242	0.479428	0.075	0.203	7.38868e-238	OLI	TMOD3
6.00313e-242	0.61443	0.195	0.415	1.01177e-237	OLI	MAT2A
7.19186e-242	0.524954	0.063	0.184	1.21212e-237	OLI	NUP210L
1.108e-241	0.594892	0.182	0.39	1.86743e-237	OLI	SYNRG
1.24067e-241	0.45612	0.152	0.332	2.09103e-237	OLI	ENSMFAG00000034835
1.64733e-241	0.619946	0.238	0.497	2.77641e-237	OLI	U2SURP
1.90239e-241	0.460745	0.068	0.192	3.20629e-237	OLI	AHSA1
2.18288e-241	0.299257	0.048	0.157	3.67903e-237	OLI	ENSMFAG00000033062
2.29403e-241	0.467123	0.116	0.272	3.86636e-237	OLI	ATP6V1G1
4.57689e-241	0.579193	0.173	0.371	7.71389e-237	OLI	INVS
9.97887e-241	1.45469	0.515	0.639	1.68184e-236	OLI	AGTPBP1
1.08537e-240	0.653906	0.088	0.227	1.82928e-236	OLI	ZNF471
1.31212e-240	0.404267	0.072	0.199	2.21144e-236	OLI	COPS8
4.09378e-240	0.306804	0.05	0.161	6.89966e-236	OLI	ENSMFAG00000002692
7.79665e-239	0.279744	0.047	0.156	1.31405e-234	OLI	FOPNL
1.27118e-238	0.414332	0.064	0.184	2.14245e-234	OLI	ANKRD40
1.42687e-238	0.58826	0.084	0.219	2.40485e-234	OLI	TAF8
1.77594e-238	0.610999	0.11	0.262	2.99317e-234	OLI	FBXL4
3.32581e-238	0.712205	0.187	0.4	5.60533e-234	OLI	TATDN1
4.30596e-238	0.313419	0.044	0.151	7.25727e-234	OLI	CRNKL1
5.78994e-238	0.400574	0.06	0.178	9.75837e-234	OLI	TRNT1
6.19843e-238	0.651665	0.093	0.234	1.04468e-233	OLI	CEP44
9.02977e-238	1.25786	0.539	0.688	1.52188e-233	OLI	UBE4B
1.85877e-237	0.62727	0.247	0.515	3.13277e-233	OLI	NAA35
4.2393e-237	0.706931	0.18	0.386	7.14492e-233	OLI	TAF1
8.88328e-237	0.391766	0.105	0.251	1.49719e-232	OLI	NCDN
1.14756e-236	0.442605	0.06	0.176	1.9341e-232	OLI	RAB5B
1.97552e-236	0.622642	0.092	0.232	3.32953e-232	OLI	CTDSP2
2.59964e-236	0.327101	0.048	0.157	4.38143e-232	OLI	ENSMFAG00000035672
1.18998e-235	0.333732	0.062	0.18	2.00558e-231	OLI	ENSMFAG00000031476
1.22972e-235	0.655731	0.102	0.249	2.07257e-231	OLI	ZNF326
2.48757e-235	0.628381	0.078	0.207	4.19254e-231	OLI	ZNF782
2.66792e-235	0.374604	0.084	0.216	4.49651e-231	OLI	LIMA1
3.08342e-235	0.419521	0.07	0.193	5.19679e-231	OLI	VBP1
4.34097e-235	0.6365	0.088	0.225	7.31627e-231	OLI	ENSMFAG00000000844
5.40941e-235	0.493156	0.087	0.221	9.11702e-231	OLI	ATP6V1G2
1.03999e-234	0.407107	0.141	0.311	1.7528e-230	OLI	IKBKB
1.11791e-234	0.706501	0.077	0.205	1.88413e-230	OLI	PITRM1
1.13268e-234	0.491814	0.057	0.172	1.90903e-230	OLI	CLPB
1.86033e-234	0.514749	0.06	0.176	3.13539e-230	OLI	AREL1
2.10802e-234	0.271607	0.341	0.688	3.55285e-230	OLI	PRRC2C
2.86755e-234	0.383996	0.184	0.383	4.83296e-230	OLI	PGRMC1
3.54478e-234	0.34713	0.262	0.53	5.97437e-230	OLI	MAP1A
3.86488e-234	0.49699	0.067	0.188	6.51386e-230	OLI	RNF138
4.06729e-234	0.371502	0.08	0.208	6.85501e-230	OLI	SCAMP2
7.66345e-234	0.258904	0.051	0.16	1.2916e-229	OLI	STYX
8.06079e-234	0.662235	0.1	0.245	1.35857e-229	OLI	SAP30BP
1.08795e-233	0.619643	0.246	0.507	1.83362e-229	OLI	URI1
1.11025e-233	0.503247	0.121	0.277	1.87121e-229	OLI	ATP5F1A
1.19677e-233	1.0289	0.571	0.726	2.01703e-229	OLI	ENSMFAG00000033294
1.69694e-233	0.517063	0.07	0.193	2.86002e-229	OLI	COPS5
2.2157e-233	0.622085	0.082	0.214	3.73434e-229	OLI	ERCC4
4.30146e-233	0.377024	0.079	0.207	7.24968e-229	OLI	ENSMFAG00000045720
4.35474e-233	0.546907	0.089	0.224	7.33949e-229	OLI	CLCC1
4.39544e-233	0.408687	0.301	0.615	7.40808e-229	OLI	ENSMFAG00000036167
4.81321e-233	0.576657	0.063	0.182	8.11218e-229	OLI	C12orf29
5.47369e-233	0.505833	0.28	0.576	9.22536e-229	OLI	TIA1
5.93945e-233	0.514081	0.065	0.185	1.00104e-228	OLI	FRG1
6.20161e-233	0.498013	0.277	0.567	1.04522e-228	OLI	PHF3
9.69437e-233	0.575339	0.1	0.244	1.63389e-228	OLI	TMPO
1.13901e-232	0.381839	0.057	0.17	1.91969e-228	OLI	THUMPD3
2.61211e-232	0.327486	0.044	0.148	4.40245e-228	OLI	TRAPPC6B
3.26475e-232	0.463507	0.081	0.211	5.5024e-228	OLI	ERH
3.53655e-232	0.413332	0.084	0.216	5.96051e-228	OLI	ENSMFAG00000045047
3.89911e-232	3.02339	0.174	0.099	6.57157e-228	OLI	ARHGEF37
3.9672e-232	0.351071	0.049	0.156	6.68633e-228	OLI	BNIP2
4.20108e-232	0.354314	0.061	0.176	7.08049e-228	OLI	AP2S1
6.5341e-232	0.569445	0.139	0.308	1.10126e-227	OLI	CNBP
1.61926e-231	0.362449	0.051	0.16	2.72911e-227	OLI	MRPL16
1.99484e-231	0.764276	0.142	0.317	3.3621e-227	OLI	ZNF566
2.49841e-231	1.72842	0.443	0.472	4.21081e-227	OLI	SWT1
5.22657e-231	1.2526	0.214	0.125	8.80887e-227	OLI	FOXO1
8.52175e-231	0.484927	0.062	0.179	1.43626e-226	OLI	MRE11
1.1619e-229	0.33039	0.037	0.136	1.95827e-225	OLI	CABYR
1.31392e-229	0.717528	0.203	0.426	2.21447e-225	OLI	TAPT1
2.91601e-229	0.450378	0.059	0.173	4.91464e-225	OLI	SRP68
8.21528e-229	0.253922	0.039	0.138	1.3846e-224	OLI	CEP41
1.08792e-228	0.542472	0.065	0.183	1.83359e-224	OLI	ENSMFAG00000031495
1.11657e-228	0.684918	0.117	0.272	1.88187e-224	OLI	SMIM4
1.61717e-228	1.38397	0.505	0.608	2.72558e-224	OLI	RETREG1
1.75095e-228	0.536239	0.076	0.201	2.95105e-224	OLI	LRRCC1
2.32557e-228	0.351677	0.11	0.256	3.91952e-224	OLI	ENSMFAG00000000298
2.37045e-228	0.489442	0.287	0.588	3.99515e-224	OLI	PAPOLA
4.24765e-228	0.755418	0.085	0.218	7.15898e-224	OLI	KIAA0930
5.23358e-228	0.256504	0.345	0.677	8.82068e-224	OLI	MDH1
5.7498e-228	0.260547	0.044	0.146	9.69071e-224	OLI	DHX38
1.13384e-227	0.428104	0.053	0.162	1.91097e-223	OLI	SEPHS1
1.27994e-227	0.848032	0.147	0.324	2.15722e-223	OLI	SVEP1
1.47276e-227	1.48739	0.503	0.612	2.48218e-223	OLI	TULP4
2.42346e-227	0.691795	0.152	0.33	4.0845e-223	OLI	SLC10A7
3.87035e-227	0.515813	0.286	0.584	6.52309e-223	OLI	SLC12A6
4.62062e-227	0.760597	0.192	0.406	7.78759e-223	OLI	FBXO28
4.90314e-227	0.384867	0.047	0.152	8.26375e-223	OLI	ENSMFAG00000031592
8.85106e-227	0.44412	0.273	0.55	1.49176e-222	OLI	IRAK2
1.3184e-226	0.349273	0.055	0.165	2.22203e-222	OLI	PATL1
2.77524e-226	0.525508	0.277	0.568	4.67739e-222	OLI	RBM33
3.04759e-226	0.353896	0.321	0.651	5.13642e-222	OLI	PPP6R3
4.83508e-226	0.349215	0.039	0.138	8.14905e-222	OLI	MORN4
1.09714e-225	0.639838	0.108	0.254	1.84911e-221	OLI	GLO1
1.34819e-225	0.284345	0.043	0.145	2.27224e-221	OLI	SF3A2
1.459e-225	0.343735	0.293	0.587	2.45899e-221	OLI	FAM171A1
1.87717e-225	0.447306	0.307	0.624	3.16379e-221	OLI	RELCH
2.96215e-225	0.301606	0.34	0.679	4.99241e-221	OLI	DENND4A
6.82665e-225	0.537197	0.174	0.366	1.15056e-220	OLI	PGAM1
6.96369e-225	0.348319	0.043	0.144	1.17366e-220	OLI	DERL1
9.93477e-225	0.308073	0.34	0.678	1.67441e-220	OLI	AUH
1.36566e-224	0.596087	0.17	0.36	2.30168e-220	OLI	ENSMFAG00000000439
3.00189e-224	0.648223	0.25	0.51	5.05939e-220	OLI	CFDP1
3.20784e-224	0.276467	0.047	0.151	5.40649e-220	OLI	CNIH4
3.24088e-224	0.432302	0.051	0.158	5.46217e-220	OLI	IMPA1
4.02782e-224	0.772935	0.113	0.262	6.78848e-220	OLI	ALG14
5.01085e-224	0.361077	0.328	0.662	8.44529e-220	OLI	CEP350
5.59613e-224	0.487414	0.063	0.178	9.43172e-220	OLI	LSM3
6.22709e-224	0.696122	0.178	0.376	1.04951e-219	OLI	PAFAH1B2
7.046e-224	0.542321	0.079	0.204	1.18753e-219	OLI	KANSL2
7.94963e-224	0.297255	0.04	0.139	1.33983e-219	OLI	GATC
8.0492e-224	2.8493	0.114	0.052	1.35661e-219	OLI	TMPRSS5
1.17575e-223	0.400716	0.291	0.587	1.9816e-219	OLI	CD46
1.19312e-223	2.18791	0.253	0.18	2.01089e-219	OLI	ENSMFAG00000038408
1.32508e-223	0.366597	0.317	0.634	2.23329e-219	OLI	SON
1.80229e-223	0.39315	0.081	0.208	3.03759e-219	OLI	CAP1
2.37282e-223	0.538271	0.084	0.213	3.99915e-219	OLI	DCLRE1C
2.90978e-223	0.452785	0.066	0.182	4.90415e-219	OLI	EEF1D
4.1191e-223	0.309938	0.043	0.144	6.94233e-219	OLI	RAB2B
5.06376e-223	0.261627	0.054	0.162	8.53446e-219	OLI	PFKFB4
8.25164e-223	0.394153	0.039	0.137	1.39073e-218	OLI	TDRKH
2.90116e-222	0.325055	0.044	0.145	4.88962e-218	OLI	PRDM4
3.91341e-222	0.260251	0.355	0.707	6.59566e-218	OLI	ZFR
4.34914e-222	0.491367	0.138	0.302	7.33003e-218	OLI	NCL
5.14856e-222	0.324254	0.063	0.176	8.67738e-218	OLI	PPP1CC
8.75089e-222	0.611428	0.097	0.233	1.47488e-217	OLI	BRD7
9.23974e-222	0.496175	0.06	0.171	1.55727e-217	OLI	VIPAS39
1.46199e-221	0.519282	0.06	0.171	2.46404e-217	OLI	PRCC
1.71473e-221	0.537288	0.13	0.288	2.89e-217	OLI	WBP2
3.56763e-221	0.432703	0.06	0.171	6.01288e-217	OLI	RTCA
6.44695e-221	0.610569	0.204	0.421	1.08657e-216	OLI	CAPN7
1.60595e-220	0.424401	0.066	0.181	2.70666e-216	OLI	MRPL20
1.6433e-220	0.769603	0.117	0.268	2.76961e-216	OLI	PDE6D
2.06144e-220	0.342245	0.055	0.163	3.47435e-216	OLI	DEGS1
2.41828e-220	0.389983	0.198	0.402	4.07577e-216	OLI	RPL15
6.90664e-220	0.331664	0.044	0.145	1.16405e-215	OLI	ABHD10
8.45441e-220	0.433351	0.249	0.499	1.42491e-215	OLI	CALM3
9.06272e-220	2.05567	0.397	0.4	1.52743e-215	OLI	ARHGAP1
9.95558e-220	0.265666	0.049	0.153	1.67791e-215	OLI	HCFC1R1
3.27302e-219	0.750315	0.165	0.353	5.51635e-215	OLI	PPP4R4
3.88684e-219	0.527155	0.06	0.171	6.55089e-215	OLI	ENSMFAG00000033682
7.33837e-219	2.33088	0.141	0.072	1.23681e-214	OLI	CSRP1
7.77128e-219	1.97291	0.395	0.391	1.30977e-214	OLI	STMN4
9.19141e-219	0.251796	0.044	0.144	1.54912e-214	OLI	NCSTN
9.39138e-219	0.283694	0.064	0.178	1.58282e-214	OLI	EGR1
1.33339e-218	0.356898	0.065	0.179	2.24729e-214	OLI	ENSMFAG00000003527
1.96646e-218	0.365448	0.145	0.31	3.31427e-214	OLI	GSAP
2.57681e-218	0.349798	0.047	0.149	4.34296e-214	OLI	WDR25
9.5065e-218	0.512943	0.06	0.172	1.60222e-213	OLI	ZNF253
1.31516e-217	0.516621	0.063	0.175	2.21658e-213	OLI	IFRD1
1.31572e-217	0.860228	0.138	0.304	2.21752e-213	OLI	BZW2
2.37002e-217	0.570572	0.257	0.522	3.99443e-213	OLI	STX16
2.99707e-217	0.260165	0.05	0.153	5.05125e-213	OLI	USP1
4.07891e-217	0.682872	0.214	0.44	6.87459e-213	OLI	PARN
7.13148e-217	0.341288	0.046	0.147	1.20194e-212	OLI	SEC22B
7.15051e-217	0.545715	0.073	0.193	1.20515e-212	OLI	ENSMFAG00000040995
1.23586e-216	0.37974	0.054	0.16	2.08291e-212	OLI	TTC7A
1.57797e-216	0.544534	0.084	0.209	2.65952e-212	OLI	ENSMFAG00000039862
3.66371e-216	0.485931	0.081	0.204	6.17482e-212	OLI	MRPL27
4.45674e-216	0.518143	0.065	0.179	7.51139e-212	OLI	COG4
6.45994e-216	0.563829	0.069	0.185	1.08876e-211	OLI	ZNF800
8.0692e-216	0.307038	0.344	0.685	1.35998e-211	OLI	UBE2H
2.27282e-215	0.559585	0.128	0.283	3.83061e-211	OLI	PPP2R1A
2.4919e-215	0.73141	0.069	0.186	4.19985e-211	OLI	SLC30A4
2.53006e-215	0.318782	0.042	0.139	4.26416e-211	OLI	ENSMFAG00000002843
2.8629e-215	1.96767	0.413	0.436	4.82514e-211	OLI	JAM3
2.91464e-215	0.437578	0.047	0.147	4.91233e-211	OLI	NAB2
3.69493e-215	0.67727	0.094	0.228	6.22743e-211	OLI	MPHOSPH10
4.14182e-215	0.293591	0.048	0.149	6.98062e-211	OLI	ASB8
4.14818e-215	0.595729	0.223	0.455	6.99134e-211	OLI	MYO9B
4.8375e-215	0.408197	0.095	0.226	8.15313e-211	OLI	SPCS1
5.14297e-215	0.387486	0.077	0.197	8.66796e-211	OLI	MTAP
1.13141e-214	0.607747	0.09	0.22	1.90688e-210	OLI	RPN2
1.59862e-214	0.474208	0.055	0.161	2.69431e-210	OLI	BNIP3L
1.96637e-214	0.34233	0.04	0.136	3.31413e-210	OLI	DHX37
3.02958e-214	0.326625	0.052	0.155	5.10606e-210	OLI	NCBP2
3.29433e-214	0.838848	0.164	0.35	5.55227e-210	OLI	BRF1
3.44836e-214	0.614124	0.07	0.186	5.81187e-210	OLI	ZNF274
3.50809e-214	0.39062	0.05	0.153	5.91254e-210	OLI	VPS52
3.58682e-214	0.755855	0.144	0.313	6.04523e-210	OLI	UBE2F
3.65912e-214	0.579394	0.054	0.159	6.16709e-210	OLI	CCDC122
5.67698e-214	0.393892	0.058	0.165	9.56799e-210	OLI	ENSMFAG00000003143
5.83032e-214	0.337097	0.066	0.179	9.82642e-210	OLI	COPRS
6.26297e-214	0.331764	0.332	0.663	1.05556e-209	OLI	MFN1
7.79098e-214	0.555037	0.225	0.455	1.31309e-209	OLI	ENSMFAG00000031285
1.41809e-213	0.252138	0.042	0.138	2.39005e-209	OLI	DNPEP
1.54731e-213	0.68992	0.181	0.376	2.60784e-209	OLI	HIF1A
2.58109e-213	0.537259	0.097	0.231	4.35017e-209	OLI	MTMR14
3.75645e-213	0.284924	0.058	0.165	6.33112e-209	OLI	ENSMFAG00000042455
4.29227e-213	0.337309	0.048	0.148	7.23419e-209	OLI	RAB5C
5.26223e-213	0.710519	0.137	0.3	8.86896e-209	OLI	CCNL1
8.08962e-213	0.570994	0.273	0.555	1.36342e-208	OLI	CPD
2.05332e-212	0.428574	0.051	0.153	3.46067e-208	OLI	METTL8
2.93215e-212	0.271333	0.053	0.156	4.94184e-208	OLI	DYNLT3
3.30947e-212	0.410044	0.047	0.147	5.57778e-208	OLI	TMEM39A
4.02282e-212	0.411394	0.139	0.298	6.78006e-208	OLI	IL6ST
1.40645e-211	0.40774	0.051	0.153	2.37044e-207	OLI	AP5Z1
4.67184e-211	0.621351	0.1	0.235	7.87393e-207	OLI	FMR1
5.14644e-211	0.621779	0.073	0.191	8.67382e-207	OLI	DPF2
7.04541e-211	0.529426	0.075	0.194	1.18743e-206	OLI	PCBP3
8.32713e-211	0.798974	0.621	0.798	1.40345e-206	OLI	TUBA1B
8.64274e-211	0.638408	0.078	0.199	1.45665e-206	OLI	USP16
2.31298e-210	0.538023	0.056	0.162	3.89829e-206	OLI	ENSMFAG00000036110
2.73435e-210	0.59842	0.277	0.562	4.60847e-206	OLI	USP14
3.5078e-210	0.373289	0.045	0.143	5.91204e-206	OLI	BORCS8
3.54812e-210	0.664409	0.22	0.448	5.98e-206	OLI	PTGES3
6.12556e-210	0.524557	0.156	0.329	1.0324e-205	OLI	VAMP2
6.71879e-210	0.465663	0.053	0.156	1.13238e-205	OLI	ING3
7.17894e-210	0.618222	0.257	0.521	1.20994e-205	OLI	TLK2
8.1868e-210	0.396621	0.044	0.141	1.3798e-205	OLI	MRPL2
1.18132e-209	0.658639	0.087	0.214	1.991e-205	OLI	ZBTB25
1.51621e-209	0.330035	0.163	0.336	2.55542e-205	OLI	ALDOC
2.03655e-209	0.368741	0.285	0.558	3.4324e-205	OLI	ARHGAP5
2.85724e-209	2.36451	0.143	0.075	4.81559e-205	OLI	CRYAB
3.44265e-209	0.332143	0.05	0.15	5.80225e-205	OLI	C1D
8.57957e-209	0.391199	0.05	0.15	1.446e-204	OLI	ENSMFAG00000003092
8.65041e-209	0.437537	0.052	0.154	1.45794e-204	OLI	CTNS
2.06725e-208	0.390111	0.05	0.151	3.48414e-204	OLI	ENSMFAG00000027455
2.23527e-208	0.777535	0.182	0.38	3.76733e-204	OLI	ENSMFAG00000044866
3.21233e-208	0.440194	0.052	0.155	5.41406e-204	OLI	CIC
4.48435e-208	0.308347	0.045	0.142	7.55792e-204	OLI	COMMD9
9.84789e-208	0.481932	0.051	0.152	1.65976e-203	OLI	LYRM7
2.31388e-207	0.569968	0.059	0.166	3.89981e-203	OLI	STK19
3.659e-207	0.30663	0.042	0.137	6.16688e-203	OLI	ECHS1
8.07511e-207	0.529571	0.081	0.201	1.36098e-202	OLI	GMFB
8.23422e-207	0.383028	0.115	0.256	1.3878e-202	OLI	ENSMFAG00000030598
1.0995e-206	0.611907	0.191	0.39	1.85309e-202	OLI	SNCB
1.46396e-206	0.306355	0.05	0.151	2.46735e-202	OLI	TRAPPC4
1.7562e-206	0.707424	0.199	0.408	2.95989e-202	OLI	DYNC1LI2
1.81896e-206	0.25043	0.043	0.138	3.06568e-202	OLI	UBE2A
1.91548e-206	0.795353	0.178	0.37	3.22835e-202	OLI	CYB5R4
4.18527e-206	0.621362	0.065	0.176	7.05386e-202	OLI	TUBD1
4.76535e-206	0.277398	0.041	0.134	8.03152e-202	OLI	NAA10
5.18286e-206	0.552534	0.096	0.225	8.73519e-202	OLI	MGMT
1.30728e-205	0.540549	0.061	0.168	2.20328e-201	OLI	PPP4C
1.39409e-205	0.285989	0.045	0.141	2.34959e-201	OLI	C6H5orf15
1.85671e-205	0.38835	0.316	0.627	3.1293e-201	OLI	ITSN2
2.18377e-205	0.269559	0.033	0.12	3.68053e-201	OLI	ZCCHC4
8.30012e-205	0.403847	0.042	0.136	1.3989e-200	OLI	CFAP20
9.619e-205	0.474166	0.31	0.621	1.62119e-200	OLI	COL4A3BP
9.81139e-205	0.318191	0.05	0.149	1.65361e-200	OLI	FKBP4
1.40402e-204	0.604067	0.075	0.191	2.36633e-200	OLI	ZBTB47
3.67975e-204	0.433446	0.219	0.433	6.20186e-200	OLI	AFF1
6.842e-204	0.283446	0.048	0.146	1.15315e-199	OLI	ARL1
7.69328e-204	0.365183	0.189	0.378	1.29662e-199	OLI	NEFL
1.10363e-203	0.381057	0.052	0.153	1.86006e-199	OLI	PHYKPL
1.20118e-203	0.611665	0.162	0.337	2.02447e-199	OLI	DPH6
1.74584e-203	0.341485	0.054	0.157	2.94244e-199	OLI	THAP6
2.14147e-203	0.497414	0.057	0.161	3.60924e-199	OLI	C19orf70
3.12609e-203	0.413799	0.063	0.171	5.26871e-199	OLI	TMX1
5.07526e-203	0.499814	0.081	0.2	8.55385e-199	OLI	ENSMFAG00000042918
6.85602e-203	0.750651	0.109	0.248	1.15551e-198	OLI	GALC
2.30588e-202	0.51886	0.144	0.303	3.88633e-198	OLI	CTSD
4.6232e-202	0.825315	0.119	0.265	7.79195e-198	OLI	TRUB2
7.04488e-202	0.346455	0.34	0.671	1.18734e-197	OLI	NCOA7
8.44498e-202	0.303103	0.355	0.692	1.42332e-197	OLI	ANKH
1.04516e-201	0.723551	0.183	0.375	1.76151e-197	OLI	THRA
2.24182e-201	0.277877	0.055	0.156	3.77836e-197	OLI	C1QBP
2.31989e-201	0.290244	0.098	0.226	3.90994e-197	OLI	NEFM
7.81839e-201	0.682395	0.241	0.484	1.31771e-196	OLI	RSRC1
9.5186e-201	0.334501	0.037	0.126	1.60427e-196	OLI	WDR13
1.65638e-200	0.862715	0.154	0.326	2.79166e-196	OLI	LPCAT3
2.69718e-200	0.458498	0.052	0.152	4.54582e-196	OLI	LEMD2
3.60666e-200	0.250392	0.07	0.179	6.07866e-196	OLI	MSMO1
4.05194e-200	0.266145	0.046	0.14	6.82915e-196	OLI	RNF6
6.46841e-200	0.453807	0.048	0.145	1.09019e-195	OLI	FRA10AC1
1.56721e-199	1.68278	0.441	0.489	2.64138e-195	OLI	ELL2
3.77368e-199	0.264506	0.048	0.144	6.36015e-195	OLI	VMA21
3.87081e-199	0.301464	0.042	0.135	6.52387e-195	OLI	PGD
5.56305e-199	0.290492	0.035	0.122	9.37596e-195	OLI	PYGL
1.11364e-198	0.604185	0.134	0.286	1.87692e-194	OLI	SNU13
1.17157e-198	0.351307	0.049	0.145	1.97456e-194	OLI	RNF7
1.98454e-198	0.381508	0.049	0.145	3.34475e-194	OLI	RRP1
2.06054e-198	0.507809	0.053	0.152	3.47283e-194	OLI	UFD1
2.39326e-198	0.847223	0.175	0.362	4.0336e-194	OLI	HMOX2
2.55389e-198	0.491873	0.044	0.137	4.30433e-194	OLI	CC2D1A
3.69086e-198	0.421093	0.046	0.141	6.22058e-194	OLI	SPATA22
3.78019e-198	0.422644	0.068	0.176	6.37114e-194	OLI	EDF1
3.97995e-198	0.44184	0.073	0.184	6.70781e-194	OLI	WDR83OS
4.67427e-198	0.843789	0.169	0.35	7.87801e-194	OLI	FAM149B1
7.36044e-198	1.64092	0.474	0.57	1.24053e-193	OLI	TARSL2
7.44951e-198	2.70196	0.169	0.1	1.25554e-193	OLI	BIN1
7.99046e-198	0.546157	0.072	0.183	1.34671e-193	OLI	ANAPC11
1.56138e-197	0.39301	0.062	0.167	2.63155e-193	OLI	ZMAT1
2.30933e-197	1.02599	0.558	0.731	3.89215e-193	OLI	ENSMFAG00000042248
2.58279e-197	0.305465	0.046	0.141	4.35303e-193	OLI	CCT5
2.98024e-197	0.74636	0.1	0.23	5.0229e-193	OLI	SPTSSA
4.81797e-197	0.412773	0.314	0.618	8.1202e-193	OLI	AFDN
5.11608e-197	0.66723	0.106	0.241	8.62264e-193	OLI	CCDC90B
9.2406e-197	0.737815	0.184	0.375	1.55741e-192	OLI	VXN
1.14568e-196	2.76207	0.198	0.129	1.93093e-192	OLI	LAP3
1.18531e-196	0.521794	0.052	0.15	1.99772e-192	OLI	FAM114A2
1.6467e-196	0.565331	0.186	0.374	2.77535e-192	OLI	TAGLN3
1.92463e-196	0.69238	0.106	0.239	3.24378e-192	OLI	APAF1
2.2441e-196	0.723638	0.246	0.495	3.78221e-192	OLI	UBE2G1
2.40243e-196	0.640873	0.171	0.349	4.04905e-192	OLI	HNRNPH1
3.04642e-196	0.462282	0.321	0.636	5.13444e-192	OLI	COG6
3.7044e-196	0.523166	0.106	0.238	6.2434e-192	OLI	RAN
4.54704e-196	0.354508	0.046	0.14	7.66358e-192	OLI	VPS11
6.4042e-196	0.732334	0.114	0.253	1.07936e-191	OLI	TMEM87B
6.55463e-196	0.460928	0.055	0.155	1.10472e-191	OLI	UFM1
1.02234e-195	0.360328	0.044	0.137	1.72304e-191	OLI	ZNF287
1.42466e-195	0.552297	0.276	0.545	2.40113e-191	OLI	SREBF2
1.87411e-195	0.38687	0.042	0.133	3.15863e-191	OLI	C2orf49
1.97222e-195	0.567796	0.066	0.173	3.32397e-191	OLI	APH1B
2.2882e-195	0.368667	0.041	0.131	3.85653e-191	OLI	ENSMFAG00000002711
2.40034e-195	0.556661	0.071	0.18	4.04553e-191	OLI	CHTOP
2.68703e-195	0.296089	0.034	0.119	4.52872e-191	OLI	PROSER1
3.16338e-195	0.482724	0.047	0.141	5.33156e-191	OLI	ERRFI1
3.37607e-195	0.285523	0.051	0.148	5.69003e-191	OLI	EPN1
3.39331e-195	1.84157	0.113	0.052	5.71908e-191	OLI	TXNIP
5.61828e-195	0.517181	0.048	0.143	9.46906e-191	OLI	CCDC62
1.00591e-194	1.79286	0.459	0.531	1.69536e-190	OLI	P3H2
1.06247e-194	1.14891	0.472	0.467	1.79068e-190	OLI	ALCAM
1.14309e-194	0.315301	0.037	0.124	1.92656e-190	OLI	NOL11
1.19074e-193	0.511047	0.05	0.145	2.00687e-189	OLI	ENSMFAG00000045271
1.39896e-193	0.520943	0.048	0.143	2.35781e-189	OLI	EDEM2
7.72131e-193	0.332719	0.036	0.122	1.30135e-188	OLI	RPS10
7.75153e-193	0.270624	0.032	0.116	1.30644e-188	OLI	EIF3F
7.97521e-193	0.702389	0.143	0.3	1.34414e-188	OLI	HNRNPR
1.17298e-192	0.655126	0.186	0.374	1.97695e-188	OLI	CIRBP
1.21089e-192	0.541409	0.065	0.171	2.04084e-188	OLI	ENSMFAG00000038402
1.27965e-192	0.315602	0.121	0.259	2.15672e-188	OLI	ITPKB
2.25007e-192	0.576607	0.094	0.218	3.79227e-188	OLI	GHITM
2.65603e-192	0.466324	0.321	0.637	4.47648e-188	OLI	ATE1
4.34205e-192	0.497975	0.051	0.148	7.31809e-188	OLI	YPEL5
6.73888e-192	0.872383	0.149	0.312	1.13577e-187	OLI	SS18
1.04602e-191	0.689591	0.259	0.517	1.76296e-187	OLI	CD200
1.30729e-191	0.822039	0.124	0.27	2.20331e-187	OLI	CCDC14
1.33711e-191	0.770123	0.163	0.336	2.25356e-187	OLI	DHX15
2.02843e-191	0.768189	0.166	0.341	3.41871e-187	OLI	IGSF8
4.58839e-191	0.605409	0.09	0.211	7.73327e-187	OLI	ENSMFAG00000038571
4.89695e-191	0.258857	0.034	0.119	8.25331e-187	OLI	SSH3
9.56159e-191	0.601794	0.096	0.22	1.61151e-186	OLI	MFAP3L
1.00491e-190	2.92614	0.147	0.083	1.69368e-186	OLI	ENSMFAG00000037184
1.29633e-190	0.571094	0.055	0.154	2.18483e-186	OLI	SGF29
1.50415e-190	0.503788	0.076	0.187	2.5351e-186	OLI	UQCRQ
1.63043e-190	0.603626	0.078	0.19	2.74793e-186	OLI	KATNA1
1.63957e-190	0.283928	0.042	0.131	2.76333e-186	OLI	UBXN1
1.82436e-190	0.257937	0.042	0.132	3.07478e-186	OLI	MAPKAPK2
1.93242e-190	0.431891	0.1	0.225	3.2569e-186	OLI	RPS9
2.68167e-190	0.331621	0.045	0.136	4.51968e-186	OLI	RPL30
3.32922e-190	0.361564	0.042	0.132	5.61106e-186	OLI	MRPS18A
4.02525e-190	0.374108	0.037	0.123	6.78416e-186	OLI	DIMT1
5.18374e-190	0.366006	0.045	0.137	8.73667e-186	OLI	HSPB11
6.24279e-190	0.532073	0.052	0.148	1.05216e-185	OLI	TRIQK
9.44325e-190	0.61819	0.057	0.156	1.59157e-185	OLI	ENSMFAG00000043832
1.81383e-189	1.3132	0.28	0.209	3.05703e-185	OLI	TMCC3
2.06184e-189	0.342792	0.043	0.132	3.47503e-185	OLI	ZDHHC24
2.29179e-189	1.24773	0.509	0.618	3.86258e-185	OLI	KLHL32
2.89337e-189	0.376265	0.337	0.661	4.87649e-185	OLI	PIAS1
4.47354e-189	0.279227	0.041	0.129	7.5397e-185	OLI	GMPR2
6.50489e-189	0.556822	0.072	0.18	1.09633e-184	OLI	WRB
9.83933e-189	0.262778	0.041	0.128	1.65832e-184	OLI	TPRG1L
1.20148e-188	1.7339	0.434	0.485	2.02497e-184	OLI	PPP2R2A
2.98018e-188	0.817638	0.125	0.269	5.02279e-184	OLI	ANAPC4
3.6754e-188	0.273937	0.036	0.12	6.19452e-184	OLI	ZNF12
3.73977e-188	0.277987	0.032	0.113	6.30301e-184	OLI	DCAF11
5.60398e-188	0.544605	0.137	0.287	9.44495e-184	OLI	PGK1
5.66366e-188	0.344603	0.041	0.129	9.54553e-184	OLI	C12orf45
6.6072e-188	0.605948	0.086	0.202	1.11358e-183	OLI	EVA1C
1.16904e-187	0.48671	0.049	0.142	1.9703e-183	OLI	ZNF518A
1.28686e-187	0.454741	0.047	0.139	2.16888e-183	OLI	ENSMFAG00000036138
3.32258e-187	0.37242	0.035	0.118	5.59988e-183	OLI	ZNF343
3.7722e-187	0.271412	0.041	0.128	6.35766e-183	OLI	ENSMFAG00000033691
8.03273e-187	0.739599	0.202	0.406	1.35384e-182	OLI	STARD9
1.25102e-186	0.765358	0.22	0.438	2.10846e-182	OLI	LTN1
1.68e-186	0.439148	0.048	0.14	2.83147e-182	OLI	POC5
1.82096e-186	0.79882	0.105	0.235	3.06905e-182	OLI	TRMT1L
2.9621e-186	0.609178	0.064	0.166	4.99233e-182	OLI	GPANK1
2.98806e-186	0.789512	0.159	0.326	5.03607e-182	OLI	ECHDC1
4.04007e-186	0.49931	0.054	0.15	6.80913e-182	OLI	KCTD20
4.78591e-186	0.470467	0.061	0.161	8.06617e-182	OLI	MDH2
7.94696e-186	0.537868	0.072	0.179	1.33938e-181	OLI	ARPC5
9.50031e-186	0.310366	0.038	0.124	1.60118e-181	OLI	URB1
1.64507e-185	0.382011	0.049	0.141	2.7726e-181	OLI	MPG
1.93779e-185	0.477348	0.059	0.157	3.26595e-181	OLI	ENSMFAG00000000699
3.69973e-185	0.302505	0.368	0.712	6.23553e-181	OLI	PCCA
3.98591e-185	0.354726	0.041	0.127	6.71785e-181	OLI	BHMG1
6.87708e-185	2.45301	0.279	0.228	1.15906e-180	OLI	GCLC
1.58143e-184	2.91012	0.134	0.072	2.66533e-180	OLI	CAPN3
1.93612e-184	1.30036	0.211	0.134	3.26314e-180	OLI	TNS3
3.46952e-184	2.15868	0.309	0.266	5.84752e-180	OLI	VRK2
3.63916e-184	0.550486	0.128	0.269	6.13344e-180	OLI	ENSMFAG00000031958
4.4601e-184	0.8223	0.16	0.327	7.51705e-180	OLI	UBXN2A
5.73943e-184	0.337498	0.08	0.191	9.67324e-180	OLI	CFLAR
5.96931e-184	0.562889	0.053	0.148	1.00607e-179	OLI	KAT8
6.17742e-184	0.403771	0.075	0.183	1.04114e-179	OLI	NAP1L5
1.10229e-183	0.911754	0.171	0.347	1.8578e-179	OLI	GTF2F2
2.15418e-183	0.741277	0.163	0.331	3.63066e-179	OLI	PNN
2.89348e-183	0.779707	0.084	0.198	4.87667e-179	OLI	SHQ1
3.32858e-183	0.841519	0.18	0.365	5.60998e-179	OLI	FAM53B
4.56885e-183	0.37436	0.036	0.119	7.70034e-179	OLI	ENSMFAG00000043579
4.85074e-183	0.328326	0.038	0.122	8.17543e-179	OLI	KHSRP
5.94998e-183	0.613367	0.072	0.178	1.00281e-178	OLI	LBR
7.01981e-183	0.358578	0.031	0.111	1.18312e-178	OLI	AAR2
1.02876e-182	0.690991	0.084	0.198	1.73387e-178	OLI	CIPC
1.23289e-182	0.754371	0.223	0.442	2.07792e-178	OLI	IMPAD1
1.6337e-182	0.392759	0.072	0.178	2.75343e-178	OLI	ENSMFAG00000030460
4.55089e-182	0.423306	0.053	0.146	7.67006e-178	OLI	PTP4A1
5.16039e-182	0.530993	0.066	0.169	8.69732e-178	OLI	BCL7C
5.99551e-182	0.472684	0.077	0.186	1.01048e-177	OLI	MAP1LC3B
7.87338e-182	0.697862	0.095	0.216	1.32698e-177	OLI	DAZAP2
8.61562e-182	0.284171	0.315	0.588	1.45208e-177	OLI	ATP6V0C
1.09871e-181	0.620255	0.094	0.214	1.85177e-177	OLI	TMED7
1.31726e-181	0.633701	0.065	0.167	2.22012e-177	OLI	KCTD2
1.53405e-181	0.737521	0.119	0.255	2.58549e-177	OLI	SRSF6
1.88776e-181	0.4844	0.038	0.122	3.18163e-177	OLI	LSR
2.05647e-181	0.470536	0.044	0.132	3.46597e-177	OLI	TBC1D10B
3.579e-181	0.3026	0.035	0.117	6.03204e-177	OLI	MRPL30
3.93525e-181	0.817547	0.114	0.247	6.63247e-177	OLI	PNPLA4
4.74748e-181	0.620678	0.092	0.211	8.0014e-177	OLI	SLC9A8
5.21573e-181	1.93221	0.391	0.407	8.79058e-177	OLI	ZKSCAN1
1.35358e-180	0.892044	0.202	0.404	2.28133e-176	OLI	CAMSAP1
1.37853e-180	0.452248	0.045	0.134	2.32338e-176	OLI	C2orf69
2.69693e-180	0.492217	0.268	0.516	4.5454e-176	OLI	YWHAH
6.85968e-180	0.253456	0.036	0.118	1.15613e-175	OLI	UBE2S
9.08987e-180	0.404393	0.038	0.122	1.53201e-175	OLI	SNF8
1.04391e-179	0.730186	0.179	0.357	1.7594e-175	OLI	IRF2
1.50563e-179	0.49306	0.054	0.147	2.53759e-175	OLI	RAB22A
1.73103e-179	0.785777	0.123	0.261	2.91747e-175	OLI	ENSMFAG00000037559
1.79064e-179	0.418011	0.043	0.129	3.01795e-175	OLI	KIAA2013
3.49512e-179	0.473692	0.137	0.281	5.89068e-175	OLI	MT3
3.57145e-179	0.814715	0.149	0.306	6.01932e-175	OLI	ARL6IP6
4.76822e-179	0.781933	0.195	0.387	8.03636e-175	OLI	CDKL3
6.25066e-179	0.500702	0.051	0.143	1.05349e-174	OLI	ZMAT2
6.62555e-179	0.652832	0.144	0.294	1.11667e-174	OLI	ENSMFAG00000043193
7.74755e-179	0.387029	0.047	0.135	1.30577e-174	OLI	RRP36
8.5066e-179	0.605185	0.075	0.181	1.4337e-174	OLI	MANEA
8.70484e-179	0.577478	0.062	0.16	1.46711e-174	OLI	GRHPR
1.29722e-178	0.520362	0.064	0.164	2.18633e-174	OLI	BZW1
2.18836e-178	0.278955	0.032	0.111	3.68826e-174	OLI	NDUFB1
2.48507e-178	0.368747	0.344	0.67	4.18834e-174	OLI	TENT2
3.43756e-178	0.30827	0.036	0.118	5.79366e-174	OLI	PFDN4
8.71778e-178	0.570474	0.065	0.166	1.46929e-173	OLI	C11orf65
1.1611e-177	0.8769	0.106	0.233	1.95692e-173	OLI	CLASRP
1.71426e-177	0.942443	0.157	0.321	2.88922e-173	OLI	TBPL1
1.9504e-177	0.36474	0.047	0.136	3.28721e-173	OLI	AMZ2
2.13453e-177	0.334149	0.046	0.133	3.59754e-173	OLI	GLRX5
4.15403e-177	0.673642	0.239	0.465	7.0012e-173	OLI	TERF2IP
4.47541e-177	0.659709	0.091	0.208	7.54285e-173	OLI	TKT
5.37945e-177	0.572985	0.062	0.16	9.06652e-173	OLI	NSL1
6.01099e-177	0.775654	0.136	0.282	1.01309e-172	OLI	RAB8B
6.18058e-177	0.852444	0.118	0.252	1.04167e-172	OLI	SNAP23
6.3007e-177	0.401114	0.047	0.136	1.06192e-172	OLI	ATOX1
9.34198e-177	0.617601	0.045	0.133	1.5745e-172	OLI	BICRA
1.00071e-176	0.605261	0.063	0.162	1.68659e-172	OLI	SMC1A
1.3568e-176	0.338938	0.037	0.119	2.28676e-172	OLI	MIER3
2.20247e-176	0.61174	0.285	0.559	3.71204e-172	OLI	THOC2
2.99352e-176	0.357518	0.048	0.137	5.04528e-172	OLI	CCDC115
3.29762e-176	0.711597	0.217	0.424	5.55781e-172	OLI	PRTFDC1
3.77457e-176	0.905851	0.206	0.41	6.36166e-172	OLI	JAKMIP3
6.38732e-176	0.732633	0.111	0.241	1.07652e-171	OLI	EMC2
6.76767e-176	0.56217	0.063	0.162	1.14062e-171	OLI	TPP1
9.93977e-176	0.824807	0.191	0.381	1.67525e-171	OLI	GPR107
1.06782e-175	0.304061	0.045	0.131	1.7997e-171	OLI	SPRYD3
1.17143e-175	0.625074	0.06	0.156	1.97433e-171	OLI	RFWD3
1.17204e-175	0.589907	0.073	0.177	1.97535e-171	OLI	ENSMFAG00000046193
1.27588e-175	0.427066	0.295	0.566	2.15037e-171	OLI	SH3KBP1
1.54056e-175	0.547622	0.096	0.215	2.59645e-171	OLI	CALR
2.08646e-175	0.478721	0.846	0.9	3.51652e-171	OLI	MDGA2
2.26635e-175	0.610633	0.071	0.174	3.8197e-171	OLI	ENSMFAG00000007624
4.99755e-175	0.459929	0.108	0.232	8.42288e-171	OLI	ENSMFAG00000030096
5.18983e-175	1.75397	0.437	0.494	8.74695e-171	OLI	KCNMB4
1.12394e-174	0.37674	0.32	0.605	1.8943e-170	OLI	ITM2B
1.14911e-174	0.624897	0.057	0.152	1.93671e-170	OLI	NOL8
1.36047e-174	0.669565	0.07	0.172	2.29294e-170	OLI	TPD52L2
1.52723e-174	0.832987	0.079	0.188	2.574e-170	OLI	ZC4H2
1.70581e-174	0.588615	0.102	0.224	2.87497e-170	OLI	ATP6V1F
1.86925e-174	0.624399	0.059	0.154	3.15044e-170	OLI	CXXC5
4.57957e-174	0.893543	0.177	0.353	7.7184e-170	OLI	GNE
7.53742e-174	0.568251	0.102	0.222	1.27036e-169	OLI	PSMB1
7.90833e-174	0.323042	0.036	0.115	1.33287e-169	OLI	COX15
9.82157e-174	0.511647	0.145	0.291	1.65533e-169	OLI	ENSMFAG00000046303
1.46575e-173	0.490114	0.065	0.163	2.47037e-169	OLI	TCEAL4
1.51371e-173	0.782286	0.103	0.227	2.55121e-169	OLI	UFL1
2.01313e-173	0.521033	0.06	0.156	3.39294e-169	OLI	UBA52
2.03663e-173	0.482232	0.057	0.151	3.43253e-169	OLI	ENSMFAG00000039531
3.09169e-173	0.507451	0.091	0.204	5.21074e-169	OLI	SAP18
4.10023e-173	0.87874	0.165	0.332	6.91053e-169	OLI	TIAL1
5.22152e-173	0.424047	0.033	0.111	8.80035e-169	OLI	RAD18
5.86763e-173	2.43348	0.301	0.265	9.8893e-169	OLI	PTPDC1
5.96104e-173	0.68896	0.186	0.365	1.00467e-168	OLI	CLTA
9.29521e-173	0.902384	0.164	0.33	1.56661e-168	OLI	INTS4
9.37449e-173	0.511419	0.322	0.627	1.57998e-168	OLI	RAB10
1.00237e-172	0.801975	0.095	0.213	1.68939e-168	OLI	BRD9
1.4448e-172	0.375543	0.038	0.119	2.43506e-168	OLI	CLPTM1L
1.61198e-172	0.86404	0.143	0.293	2.71684e-168	OLI	BACE1
1.98056e-172	0.506156	0.319	0.619	3.33803e-168	OLI	FAM135A
2.47035e-172	0.521076	0.047	0.134	4.16353e-168	OLI	HAUS6
2.84001e-172	0.277882	0.031	0.107	4.78656e-168	OLI	OTUD6B
4.20667e-172	0.53118	0.048	0.136	7.08993e-168	OLI	TMED5
4.76065e-172	0.662676	0.058	0.152	8.0236e-168	OLI	ZFYVE1
5.82806e-172	0.892296	0.179	0.358	9.82262e-168	OLI	ZBTB8OS
6.40704e-172	0.367074	0.043	0.127	1.07984e-167	OLI	LMAN1
6.92934e-172	0.779842	0.094	0.211	1.16787e-167	OLI	HSCB
7.32605e-172	0.90105	0.147	0.3	1.23473e-167	OLI	PIR
2.19511e-171	0.799792	0.084	0.195	3.69964e-167	OLI	TAF5L
2.71625e-171	0.790147	0.146	0.298	4.57797e-167	OLI	LNPEP
6.72213e-171	0.399613	0.051	0.14	1.13295e-166	OLI	CACNA1S
8.00098e-171	0.740516	0.075	0.178	1.34848e-166	OLI	ENSMFAG00000043402
1.00832e-170	0.635446	0.105	0.226	1.69942e-166	OLI	C18orf32
1.02928e-170	0.323172	0.032	0.109	1.73474e-166	OLI	PPT2
1.27105e-170	0.739921	0.066	0.164	2.14223e-166	OLI	IKZF4
1.30253e-170	0.660791	0.12	0.252	2.19529e-166	OLI	ARHGAP17
2.62247e-170	0.337284	0.041	0.122	4.41991e-166	OLI	SUMO3
2.66658e-170	0.600045	0.132	0.27	4.49426e-166	OLI	TUBA4A
2.83598e-170	0.370499	0.05	0.137	4.77976e-166	OLI	TMEM70
3.79249e-170	0.659033	0.077	0.182	6.39186e-166	OLI	C12orf73
8.71725e-170	0.296075	0.039	0.12	1.4692e-165	OLI	IKBKG
9.34759e-170	0.263021	0.046	0.13	1.57544e-165	OLI	PSMB5
2.07618e-169	0.422879	0.04	0.121	3.4992e-165	OLI	POLDIP3
2.20289e-169	0.633143	0.039	0.119	3.71275e-165	OLI	WDR64
5.86313e-169	0.26261	0.034	0.112	9.88173e-165	OLI	DDX23
6.28035e-169	0.529975	0.055	0.146	1.05849e-164	OLI	DMAC1
7.2767e-169	0.328999	0.038	0.118	1.22642e-164	OLI	ENSMFAG00000037178
8.8794e-169	0.3399	0.053	0.141	1.49653e-164	OLI	ENSMFAG00000039146
1.11892e-168	2.74612	0.187	0.125	1.88584e-164	OLI	MOSPD2
3.28787e-168	0.892313	0.219	0.429	5.54138e-164	OLI	UIMC1
6.41413e-168	0.617683	0.276	0.532	1.08104e-163	OLI	NUCKS1
6.53423e-168	0.520753	0.049	0.135	1.10128e-163	OLI	THAP3
2.82286e-167	0.252185	0.048	0.133	4.75765e-163	OLI	CENPS-CORT
3.4295e-167	0.893446	0.129	0.268	5.78008e-163	OLI	TANGO2
5.08099e-167	0.768537	0.115	0.243	8.5635e-163	OLI	UBA1
7.3552e-167	0.355182	0.039	0.119	1.23965e-162	OLI	SNX11
2.68828e-166	0.56561	0.057	0.148	4.53083e-162	OLI	REPIN1
2.93786e-166	0.586615	0.079	0.184	4.95147e-162	OLI	ENSMFAG00000000624
3.84809e-166	0.758072	0.114	0.241	6.48558e-162	OLI	ARL8A
4.18574e-166	0.827615	0.087	0.197	7.05464e-162	OLI	TMEM192
4.47522e-166	0.536241	0.067	0.165	7.54254e-162	OLI	PIK3IP1
4.61141e-166	0.675984	0.28	0.544	7.77207e-162	OLI	MSH3
4.80498e-166	0.506788	0.048	0.133	8.09831e-162	OLI	GDE1
4.9772e-166	1.14845	0.142	0.292	8.38858e-162	OLI	SHANK3
6.1533e-166	0.400747	0.03	0.103	1.03708e-161	OLI	ZNF558
6.33476e-166	0.285147	0.031	0.105	1.06766e-161	OLI	MKS1
8.46605e-166	0.75171	0.088	0.198	1.42687e-161	OLI	NDUFS7
1.75148e-165	2.30935	0.129	0.07	2.95195e-161	OLI	INSYN2
2.08645e-165	0.401378	0.038	0.117	3.51651e-161	OLI	PAFAH1B3
4.34991e-165	0.26418	0.036	0.112	7.33133e-161	OLI	MED10
5.13557e-165	0.647214	0.29	0.566	8.65549e-161	OLI	FXR1
5.35226e-165	0.701411	0.063	0.157	9.0207e-161	OLI	AIFM1
8.6108e-165	0.450371	0.046	0.13	1.45127e-160	OLI	ENSMFAG00000042056
1.13801e-164	0.483266	0.071	0.169	1.918e-160	OLI	DCTN3
2.17382e-164	0.306099	0.032	0.106	3.66375e-160	OLI	CASP2
4.74837e-164	2.81152	0.176	0.115	8.0029e-160	OLI	ZDHHC9
5.50274e-164	0.313025	0.029	0.102	9.27431e-160	OLI	GMEB2
8.99806e-164	0.641212	0.157	0.309	1.51653e-159	OLI	RWDD3
9.69709e-164	0.504315	0.039	0.118	1.63435e-159	OLI	TGDS
9.95273e-164	2.24066	0.315	0.286	1.67743e-159	OLI	ABHD17B
2.15042e-163	0.705017	0.075	0.177	3.62431e-159	OLI	ARFGAP2
2.84382e-163	0.906405	0.146	0.294	4.79297e-159	OLI	ADORA1
3.01341e-163	0.314371	0.034	0.109	5.0788e-159	OLI	TTC31
4.27131e-163	0.84488	0.09	0.201	7.19886e-159	OLI	ENSMFAG00000035540
5.50545e-163	0.395513	0.067	0.162	9.27889e-159	OLI	TMEM160
5.94933e-163	0.557506	0.085	0.192	1.0027e-158	OLI	ERP29
6.03337e-163	0.709746	0.25	0.482	1.01686e-158	OLI	ENSMFAG00000006057
9.18209e-163	0.472019	0.049	0.133	1.54755e-158	OLI	MED29
1.24456e-162	0.410215	0.283	0.531	2.09758e-158	OLI	RGS4
1.6761e-162	0.304329	0.036	0.112	2.8249e-158	OLI	LAMTOR3
2.31497e-162	0.290232	0.034	0.109	3.90165e-158	OLI	ENSMFAG00000003395
2.70709e-162	0.422109	0.042	0.122	4.56252e-158	OLI	NDUFS6
3.34154e-162	0.488262	0.315	0.603	5.63183e-158	OLI	OSBPL9
3.54235e-162	0.336091	0.127	0.255	5.97028e-158	OLI	FIGN
5.99586e-162	0.410674	0.044	0.125	1.01054e-157	OLI	KIAA1143
8.74428e-162	0.519037	0.157	0.305	1.47376e-157	OLI	ENSMFAG00000011451
1.09158e-161	0.472115	0.046	0.129	1.83975e-157	OLI	ENSMFAG00000004349
1.53605e-161	0.625558	0.103	0.22	2.58885e-157	OLI	MYL12A
2.03079e-161	0.500475	0.049	0.134	3.4227e-157	OLI	SMPD1
2.63799e-161	0.403468	0.041	0.12	4.44606e-157	OLI	LAMTOR5
2.77161e-161	0.307973	0.037	0.114	4.67127e-157	OLI	STOML2
3.06296e-161	0.884671	0.156	0.311	5.16231e-157	OLI	FAM91A1
3.32154e-161	0.446884	0.036	0.112	5.59812e-157	OLI	SDHAF4
4.07057e-161	0.752837	0.069	0.166	6.86053e-157	OLI	MAIP1
5.67111e-161	0.474541	0.046	0.128	9.5581e-157	OLI	NIT1
6.693e-161	0.267594	0.032	0.105	1.12804e-156	OLI	IDH3B
1.0742e-160	0.371963	0.099	0.211	1.81046e-156	OLI	ZNF521
1.21272e-160	0.423534	0.059	0.149	2.04391e-156	OLI	IDI1
4.27477e-160	0.329443	0.03	0.102	7.2047e-156	OLI	CDK5
4.27966e-160	0.825945	0.115	0.24	7.21294e-156	OLI	TMEM165
4.76663e-160	0.283223	0.033	0.106	8.03367e-156	OLI	ENSMFAG00000039394
5.32599e-160	0.420104	0.03	0.102	8.97642e-156	OLI	CDC25B
8.07023e-160	0.351515	0.033	0.107	1.36016e-155	OLI	ENSMFAG00000040656
1.46137e-159	0.42069	0.765	0.932	2.46299e-155	OLI	KIAA0355
3.41298e-159	0.452585	0.034	0.108	5.75224e-155	OLI	MANSC1
3.68456e-159	0.832342	0.169	0.331	6.20995e-155	OLI	POLA1
4.29957e-159	0.624663	0.051	0.135	7.24649e-155	OLI	PTPN21
4.58411e-159	0.567037	0.065	0.158	7.72605e-155	OLI	ENSMFAG00000030228
5.74648e-159	0.445754	0.09	0.197	9.68512e-155	OLI	ENSMFAG00000015746
1.5126e-158	0.604316	0.302	0.585	2.54934e-154	OLI	ZC3H11A
1.6136e-158	0.353257	0.035	0.109	2.71956e-154	OLI	TRAPPC3
3.39934e-158	0.385769	0.037	0.113	5.72925e-154	OLI	TP53I3
3.9139e-158	0.311952	0.034	0.107	6.59649e-154	OLI	DERL2
5.36831e-158	0.62052	0.082	0.185	9.04776e-154	OLI	D2HGDH
7.9126e-158	0.736792	0.067	0.161	1.33359e-153	OLI	RMC1
1.03468e-157	0.387984	0.064	0.155	1.74384e-153	OLI	RPS19
1.12369e-157	2.51471	0.171	0.111	1.89386e-153	OLI	UNC5B
2.51047e-157	0.89393	0.205	0.396	4.23114e-153	OLI	NT5DC1
5.01667e-157	0.613004	0.109	0.227	8.4551e-153	OLI	ENSMFAG00000003346
5.51135e-157	0.606558	0.064	0.156	9.28882e-153	OLI	WASHC3
1.24821e-156	0.752468	0.063	0.155	2.10374e-152	OLI	SAV1
1.80545e-156	0.655077	0.133	0.267	3.0429e-152	OLI	B3GLCT
2.31058e-156	0.63058	0.062	0.152	3.89425e-152	OLI	MRPL19
3.24495e-156	0.42109	0.038	0.113	5.46904e-152	OLI	ZNF75D
5.28614e-156	0.623268	0.072	0.169	8.90926e-152	OLI	ANKRD13A
6.15087e-156	0.260928	0.036	0.11	1.03667e-151	OLI	TRIM28
1.4607e-155	0.870237	0.159	0.313	2.46186e-151	OLI	CARF
1.48744e-155	0.559962	0.075	0.173	2.50694e-151	OLI	TUBB4B
1.57766e-155	0.407411	0.035	0.109	2.65899e-151	OLI	DNAJC9
1.62925e-155	0.521715	0.063	0.154	2.74595e-151	OLI	LAMTOR1
1.9636e-155	0.86923	0.096	0.208	3.30945e-151	OLI	ENDOD1
2.64824e-155	0.53854	0.039	0.116	4.46334e-151	OLI	MCOLN1
5.93651e-155	0.716969	0.272	0.525	1.00054e-150	OLI	COPA
6.26733e-155	0.908789	0.166	0.326	1.0563e-150	OLI	ARMC1
9.58139e-155	0.446745	0.041	0.117	1.61485e-150	OLI	ENSMFAG00000044343
9.80388e-155	0.581607	0.043	0.121	1.65235e-150	OLI	VAMP7
2.13019e-154	0.585462	0.042	0.119	3.59022e-150	OLI	BCORL1
2.63875e-154	0.860156	0.066	0.159	4.44734e-150	OLI	MTURN
2.93352e-154	0.587021	0.053	0.138	4.94416e-150	OLI	SP2
3.48815e-154	0.536081	0.054	0.139	5.87892e-150	OLI	ENSMFAG00000035382
3.68269e-154	0.300052	0.03	0.1	6.20681e-150	OLI	TAF11
6.16091e-154	0.776087	0.095	0.204	1.03836e-149	OLI	ZNF438
1.07426e-153	0.815951	0.165	0.32	1.81056e-149	OLI	TET1
1.2013e-153	0.522143	0.074	0.17	2.02468e-149	OLI	NDUFB9
1.93316e-153	0.744407	0.08	0.18	3.25815e-149	OLI	GIT1
2.17352e-153	0.543878	0.041	0.118	3.66324e-149	OLI	VPS9D1
2.7131e-153	0.582978	0.105	0.219	4.57266e-149	OLI	ENSMFAG00000041255
2.75927e-153	0.294215	0.036	0.109	4.65047e-149	OLI	HRAS
3.45132e-153	0.493185	0.045	0.124	5.81686e-149	OLI	BAG5
4.87328e-153	0.337056	0.034	0.106	8.21342e-149	OLI	UBE2M
5.39361e-153	0.353106	0.032	0.103	9.09039e-149	OLI	LSM14B
6.38117e-153	0.536747	0.039	0.114	1.07548e-148	OLI	LZTR1
7.4901e-153	0.922794	0.19	0.367	1.26238e-148	OLI	FLNB
1.08438e-152	0.540624	0.329	0.634	1.82762e-148	OLI	MIGA1
1.99352e-152	0.398525	0.034	0.106	3.35989e-148	OLI	ENSMFAG00000037304
4.73291e-152	0.716908	0.049	0.131	7.97685e-148	OLI	RSPH14
5.01226e-152	0.779474	0.242	0.462	8.44767e-148	OLI	INTS10
5.77313e-152	0.279524	0.041	0.117	9.73003e-148	OLI	STAT1
8.65925e-152	0.930757	0.209	0.403	1.45943e-147	OLI	DNAJC7
5.7752e-151	0.864451	0.068	0.16	9.73352e-147	OLI	ENSMFAG00000037164
8.04638e-151	0.719248	0.207	0.393	1.35614e-146	OLI	HNRNPK
8.46258e-151	0.608684	0.056	0.141	1.42628e-146	OLI	NOLC1
8.91163e-151	0.364955	0.038	0.111	1.50197e-146	OLI	HSD17B11
9.54634e-151	0.398283	0.358	0.684	1.60894e-146	OLI	MON2
9.86025e-151	0.63689	0.088	0.192	1.66185e-146	OLI	PPIB
2.21719e-150	0.531961	0.043	0.12	3.73685e-146	OLI	GTF2H5
4.81868e-150	0.362824	0.037	0.109	8.1214e-146	OLI	RNF5
6.28144e-150	0.880447	0.118	0.241	1.05867e-145	OLI	MPP5
8.58465e-150	0.680075	0.287	0.544	1.44686e-145	OLI	AKAP7
1.11964e-149	0.924938	0.074	0.169	1.88704e-145	OLI	DTX4
1.19426e-149	0.490274	0.035	0.106	2.01281e-145	OLI	NHLRC3
1.23765e-149	0.3569	0.044	0.121	2.08594e-145	OLI	ENSMFAG00000003238
1.60165e-149	0.868914	0.078	0.176	2.69942e-145	OLI	ENSMFAG00000046598
1.87074e-149	0.771887	0.061	0.148	3.15294e-145	OLI	SNX8
2.26345e-149	0.778276	0.142	0.279	3.81482e-145	OLI	SCOC
3.23687e-149	0.864658	0.12	0.244	5.45542e-145	OLI	OFD1
4.05711e-149	0.411038	0.042	0.118	6.83786e-145	OLI	PRAF2
7.01058e-149	0.741548	0.089	0.193	1.18156e-144	OLI	ZNF706
7.64103e-149	1.18999	0.239	0.169	1.28782e-144	OLI	ZBTB20
1.13215e-148	0.500291	0.05	0.131	1.90812e-144	OLI	NDUFA2
1.19399e-148	0.855422	0.226	0.43	2.01234e-144	OLI	ZC3H6
1.36366e-148	0.872351	0.14	0.277	2.29831e-144	OLI	SH3BP5
1.65333e-148	0.525258	0.037	0.109	2.78651e-144	OLI	RBM48
3.36911e-148	0.701608	0.132	0.262	5.67829e-144	OLI	ENSMFAG00000030463
5.56172e-148	0.52838	0.045	0.123	9.37372e-144	OLI	ENSMFAG00000045904
6.06026e-148	0.659116	0.289	0.55	1.0214e-143	OLI	LRRFIP2
6.08047e-148	0.908537	0.229	0.438	1.0248e-143	OLI	RBL2
7.83824e-148	0.700658	0.066	0.157	1.32106e-143	OLI	NRBP1
1.41621e-147	0.82965	0.079	0.177	2.38688e-143	OLI	CBR4
1.59583e-147	0.338021	0.039	0.112	2.68961e-143	OLI	TADA3
4.52596e-147	0.263027	0.034	0.103	7.62806e-143	OLI	PYURF
6.45404e-147	0.537875	0.06	0.145	1.08776e-142	OLI	SMDT1
9.78714e-147	0.909723	0.21	0.401	1.64953e-142	OLI	FANCL
1.25115e-146	0.607469	0.062	0.148	2.10869e-142	OLI	KLHL9
2.11125e-146	0.586883	0.083	0.182	3.5583e-142	OLI	RABAC1
2.21669e-146	0.410833	0.294	0.538	3.73601e-142	OLI	PPFIBP1
2.55817e-146	0.461885	0.04	0.113	4.31154e-142	OLI	PDHB
4.38353e-146	0.367307	0.045	0.121	7.388e-142	OLI	C12orf66
4.6818e-146	0.411353	0.041	0.114	7.8907e-142	OLI	THUMPD1
5.91022e-146	0.418745	0.034	0.104	9.96108e-142	OLI	NFE2L3
6.1828e-146	0.634813	0.057	0.141	1.04205e-141	OLI	ENSMFAG00000038708
7.80796e-146	0.418997	0.033	0.101	1.31595e-141	OLI	LRRC39
1.04779e-145	0.662395	0.294	0.563	1.76595e-141	OLI	SFSWAP
1.12421e-145	0.803524	0.07	0.162	1.89475e-141	OLI	PKD2L2
1.198e-145	0.433287	0.361	0.684	2.01911e-141	OLI	PBRM1
1.41819e-145	0.676129	0.072	0.164	2.39022e-141	OLI	CCDC107
1.67616e-145	0.543862	0.044	0.12	2.825e-141	OLI	IGSF10
3.23896e-145	0.685195	0.071	0.162	5.45894e-141	OLI	PSMG4
3.95011e-145	0.433929	0.048	0.125	6.65752e-141	OLI	EIF4A1
4.35758e-145	0.805307	0.268	0.51	7.34427e-141	OLI	PWWP2A
4.37688e-145	0.75974	0.087	0.188	7.3768e-141	OLI	PIGF
5.61838e-145	1.16184	0.43	0.458	9.46922e-141	OLI	KIF13A
6.46171e-145	0.737003	0.276	0.526	1.08906e-140	OLI	SLTM
7.8902e-145	0.753779	0.148	0.286	1.32981e-140	OLI	DGKH
9.49227e-145	0.698322	0.06	0.145	1.59983e-140	OLI	GNAZ
9.94142e-145	0.677575	0.13	0.257	1.67553e-140	OLI	DYNLL2
1.26856e-144	0.92342	0.128	0.256	2.13804e-140	OLI	CBX7
1.72154e-144	0.855215	0.179	0.342	2.90149e-140	OLI	SEPT8
2.17358e-144	0.372796	0.044	0.119	3.66336e-140	OLI	KRT10
2.30829e-144	0.673449	0.069	0.16	3.8904e-140	OLI	CTPS2
3.3018e-144	0.762259	0.076	0.171	5.56485e-140	OLI	TRMO
5.24222e-144	1.16546	0.119	0.241	8.83524e-140	OLI	HSD11B1
8.41743e-144	1.07318	0.527	0.695	1.41867e-139	OLI	HECW2
1.0712e-143	0.615235	0.309	0.582	1.8054e-139	OLI	ATF7IP
1.09625e-143	0.565272	0.04	0.113	1.84762e-139	OLI	KCTD9
1.66594e-143	0.505794	0.341	0.649	2.80778e-139	OLI	ANKHD1-EIF4EBP3
1.82676e-143	2.93149	0.172	0.117	3.07882e-139	OLI	AFAP1L1
2.41103e-143	1.44851	0.209	0.144	4.06355e-139	OLI	KANK1
2.76986e-143	0.396979	0.043	0.117	4.66832e-139	OLI	ZNF358
2.79718e-143	0.389985	0.348	0.649	4.71436e-139	OLI	YWHAG
2.9204e-143	0.826445	0.241	0.457	4.92204e-139	OLI	MDM4
2.99353e-143	0.611302	0.29	0.545	5.0453e-139	OLI	NRF1
8.27334e-143	0.267718	0.903	0.945	1.39439e-138	OLI	AUTS2
1.18114e-142	0.324245	0.035	0.104	1.99069e-138	OLI	MAGED1
1.34467e-142	0.874913	0.068	0.157	2.2663e-138	OLI	TSEN15
1.51693e-142	0.59508	0.059	0.143	2.55663e-138	OLI	PTS
1.8438e-142	0.517397	0.036	0.105	3.10755e-138	OLI	TRIM52
2.49919e-142	0.760966	0.058	0.142	4.21214e-138	OLI	ENSMFAG00000046665
2.72852e-142	1.81375	0.246	0.193	4.59865e-138	OLI	NEK7
3.63148e-142	0.633868	0.069	0.158	6.1205e-138	OLI	PRIMPOL
5.01939e-142	0.398992	0.055	0.135	8.45968e-138	OLI	RPS16
5.80775e-142	0.317738	0.044	0.117	9.78839e-138	OLI	ARID3B
6.87445e-142	0.737992	0.092	0.194	1.15862e-137	OLI	ENSMFAG00000036810
1.78789e-141	0.482011	0.038	0.109	3.01331e-137	OLI	OSGEPL1
2.55107e-141	0.535843	0.062	0.147	4.29957e-137	OLI	RTRAF
3.85971e-141	0.618355	0.081	0.176	6.50516e-137	OLI	RPL4
4.02598e-141	0.443696	0.039	0.11	6.78538e-137	OLI	MED30
4.94583e-141	0.467063	0.034	0.102	8.3357e-137	OLI	INTS13
5.76295e-141	0.415541	0.033	0.101	9.71288e-137	OLI	ENSMFAG00000030371
5.95276e-141	0.687808	0.055	0.136	1.00328e-136	OLI	SYCP2
7.2695e-141	0.466031	0.058	0.139	1.2252e-136	OLI	ENSMFAG00000025723
8.27734e-141	0.790469	0.238	0.45	1.39506e-136	OLI	CCDC82
1.06046e-140	0.567804	0.075	0.166	1.7873e-136	OLI	SLC25A5
1.57453e-140	0.535874	0.045	0.119	2.65371e-136	OLI	CYP4V2
5.5914e-140	0.621866	0.049	0.126	9.42375e-136	OLI	POGK
1.18699e-139	0.827808	0.069	0.158	2.00055e-135	OLI	TCEANC2
1.45185e-139	0.369662	0.047	0.122	2.44695e-135	OLI	HSDL2
3.19667e-139	0.589278	0.048	0.124	5.38766e-135	OLI	ENSMFAG00000001340
4.71787e-139	0.622607	0.049	0.125	7.95149e-135	OLI	TAF6L
5.43517e-139	0.760505	0.086	0.184	9.16043e-135	OLI	ALDH6A1
1.23538e-138	0.537027	0.042	0.114	2.08211e-134	OLI	KDELR3
1.55004e-138	0.983935	0.131	0.258	2.61244e-134	OLI	SPART
1.83908e-138	0.380622	0.373	0.705	3.09958e-134	OLI	C7orf55-LUC7L2
2.07331e-138	0.44968	0.04	0.11	3.49436e-134	OLI	RRAGC
2.25256e-138	0.275048	0.402	0.753	3.79647e-134	OLI	DMXL1
2.92029e-138	0.702266	0.062	0.145	4.92185e-134	OLI	COX20
3.24857e-138	2.53313	0.118	0.066	5.47513e-134	OLI	CBR1
5.46454e-138	0.63476	0.077	0.169	9.20994e-134	OLI	CAPN2
6.3119e-138	0.465097	0.04	0.111	1.06381e-133	OLI	SF3B6
6.92767e-138	1.00984	0.14	0.274	1.16759e-133	OLI	USP30
1.61816e-137	0.299341	0.181	0.318	2.72724e-133	OLI	PDE1C
2.73164e-137	0.438738	0.044	0.116	4.60391e-133	OLI	MRPS33
2.78178e-137	0.435328	0.047	0.121	4.68842e-133	OLI	RPL10A
2.82206e-137	0.543599	0.064	0.148	4.7563e-133	OLI	ENSMFAG00000036093
2.8617e-137	0.608078	0.05	0.126	4.82311e-133	OLI	CHMP2B
3.22144e-137	1.18751	0.508	0.668	5.42942e-133	OLI	RALGPS1
3.25455e-137	0.671489	0.046	0.12	5.48521e-133	OLI	SLC35E3
3.44205e-137	0.343006	0.035	0.103	5.80124e-133	OLI	ENSMFAG00000031092
4.79597e-137	0.65737	0.044	0.117	8.08313e-133	OLI	CCT6B
5.62921e-137	0.594232	0.056	0.136	9.48747e-133	OLI	COPZ1
6.0456e-137	0.548486	0.058	0.139	1.01893e-132	OLI	MVB12A
7.94411e-137	0.520438	0.036	0.104	1.3389e-132	OLI	POLR3H
8.47745e-137	0.882836	0.161	0.307	1.42879e-132	OLI	MUM1
9.70405e-137	0.826797	0.584	0.771	1.63552e-132	OLI	GRID1
1.19329e-136	0.395	0.036	0.104	2.01117e-132	OLI	ENSMFAG00000000823
1.84426e-136	0.404664	0.039	0.109	3.10831e-132	OLI	TCEAL5
3.56182e-136	0.543776	0.053	0.131	6.00309e-132	OLI	ENSMFAG00000045767
3.96362e-136	0.669275	0.284	0.529	6.68029e-132	OLI	SCAF11
4.18378e-136	0.515736	0.044	0.116	7.05134e-132	OLI	SRSF2
4.84306e-136	0.799312	0.119	0.235	8.1625e-132	OLI	PRKD3
1.29077e-135	0.473786	0.04	0.11	2.17547e-131	OLI	TNIP1
1.90632e-135	0.539857	0.034	0.101	3.21292e-131	OLI	ENSMFAG00000037798
2.88947e-135	0.431984	0.063	0.145	4.86992e-131	OLI	ENSMFAG00000021547
3.28316e-135	0.593091	0.055	0.133	5.53343e-131	OLI	CRIPT
3.68612e-135	0.582929	0.054	0.133	6.21258e-131	OLI	ENSMFAG00000033843
9.49704e-135	0.608879	0.045	0.117	1.60063e-130	OLI	LRRTM2
1.01696e-134	0.636141	0.06	0.142	1.71398e-130	OLI	SSNA1
1.04212e-134	0.515906	0.041	0.112	1.75639e-130	OLI	RBM22
1.24423e-134	0.779991	0.055	0.133	2.09702e-130	OLI	FAAH
2.84477e-134	0.632642	0.305	0.574	4.79458e-130	OLI	ENSMFAG00000043281
2.85958e-134	1.50683	0.451	0.551	4.81954e-130	OLI	ELF2
2.93108e-134	0.976577	0.222	0.418	4.94004e-130	OLI	IFT80
3.77547e-134	0.834309	0.215	0.4	6.36318e-130	OLI	GALNT1
4.43993e-134	0.477581	0.065	0.148	7.48306e-130	OLI	ZFAND6
5.60665e-134	0.932357	0.174	0.328	9.44946e-130	OLI	RHBDL2
1.11246e-133	0.570541	0.084	0.178	1.87494e-129	OLI	ENSMFAG00000034515
1.65679e-133	0.644778	0.074	0.163	2.79235e-129	OLI	ENSMFAG00000045541
3.05672e-133	0.83907	0.567	0.763	5.15179e-129	OLI	RNF130
3.69812e-133	0.794098	0.06	0.141	6.23282e-129	OLI	ZNF169
4.9532e-133	0.697103	0.046	0.119	8.34812e-129	OLI	ZSCAN26
6.54133e-133	0.731987	0.111	0.221	1.10248e-128	OLI	CADM4
8.09741e-133	0.642254	0.081	0.174	1.36474e-128	OLI	SYNM
1.00423e-132	0.785435	0.27	0.506	1.69253e-128	OLI	SPG11
1.03739e-132	0.564043	0.049	0.124	1.74842e-128	OLI	UQCRB
1.32337e-132	0.917541	0.089	0.187	2.2304e-128	OLI	SFT2D1
1.85267e-132	0.5359	0.036	0.102	3.12249e-128	OLI	TMEM267
2.51166e-132	0.521915	0.33	0.613	4.23315e-128	OLI	YWHAE
3.01744e-132	0.678894	0.287	0.536	5.08559e-128	OLI	LRRC8B
3.20903e-132	0.395172	0.371	0.698	5.4085e-128	OLI	KIAA0232
1.0358e-131	0.255499	0.361	0.648	1.74574e-127	OLI	CAMK2N1
2.45159e-131	0.860456	0.055	0.133	4.13191e-127	OLI	NMRK1
6.61252e-131	0.482022	0.043	0.113	1.11447e-126	OLI	COA5
6.74035e-131	0.667692	0.044	0.114	1.13602e-126	OLI	MITD1
8.06602e-131	0.311514	0.39	0.725	1.35945e-126	OLI	ENSMFAG00000030493
8.24938e-131	0.673488	0.049	0.123	1.39035e-126	OLI	ENSMFAG00000002433
9.08843e-131	0.993452	0.061	0.142	1.53176e-126	OLI	TTLL9
1.20005e-130	0.766854	0.264	0.493	2.02256e-126	OLI	ACTN4
5.17561e-130	0.640298	0.038	0.105	8.72297e-126	OLI	ZCRB1
5.23424e-130	0.99732	0.107	0.215	8.82179e-126	OLI	PRKCSH
6.04321e-130	2.54918	0.162	0.109	1.01852e-125	OLI	TCP11L2
6.4152e-130	0.604866	0.322	0.607	1.08122e-125	OLI	CNOT2
9.42994e-130	0.957232	0.121	0.237	1.58932e-125	OLI	MATN2
2.13336e-129	0.667308	0.138	0.261	3.59556e-125	OLI	GABARAPL2
2.53857e-129	0.818291	0.086	0.18	4.27851e-125	OLI	SNRPD3
3.8686e-129	0.475068	0.037	0.103	6.52014e-125	OLI	FAM3A
5.02767e-129	0.46888	0.041	0.109	8.47364e-125	OLI	BCL9
6.8435e-129	0.738217	0.047	0.119	1.1534e-124	OLI	ELMOD2
8.84011e-129	1.00542	0.18	0.337	1.48991e-124	OLI	WASHC5
9.01458e-129	0.512886	0.038	0.105	1.51932e-124	OLI	DAD1
1.0516e-128	0.412082	0.079	0.167	1.77236e-124	OLI	ATP7A
1.12291e-128	0.616675	0.038	0.104	1.89255e-124	OLI	UBXN8
1.5641e-128	0.406198	0.037	0.102	2.63613e-124	OLI	TIMM10B
2.31438e-128	0.769754	0.148	0.279	3.90066e-124	OLI	SERF2
2.53586e-128	2.87606	0.122	0.072	4.27394e-124	OLI	PIGA
3.09197e-128	0.841844	0.263	0.491	5.2112e-124	OLI	SMG7
4.57414e-128	0.792564	0.103	0.206	7.70926e-124	OLI	ELMSAN1
5.01166e-128	0.677768	0.116	0.225	8.44665e-124	OLI	ENSMFAG00000029998
5.72073e-128	0.372156	0.036	0.1	9.64172e-124	OLI	SPAG7
9.45328e-128	0.878919	0.111	0.219	1.59326e-123	OLI	ENSMFAG00000031377
1.44319e-127	0.689867	0.058	0.136	2.43236e-123	OLI	SBDS
2.90415e-127	1.00561	0.203	0.378	4.89465e-123	OLI	PIGU
7.41111e-127	0.595262	0.055	0.13	1.24907e-122	OLI	RANBP1
8.63794e-127	0.880759	0.064	0.146	1.45584e-122	OLI	UBE2Z
1.40942e-126	0.414034	0.054	0.128	2.37544e-122	OLI	ENSMFAG00000019461
1.74982e-126	0.403616	0.368	0.682	2.94914e-122	OLI	THADA
2.00307e-126	0.957443	0.562	0.747	3.37597e-122	OLI	OSBP2
2.64376e-126	0.472336	0.074	0.16	4.4558e-122	OLI	HEG1
[truncated: 11,903 more rows]
