# Supplementary material
Source: Research Square preprint supplement (doi:10.21203/rs.3.rs-8976053/v1)
Supplement: Supplementary file 10 [file 8c42e5703a21bf02001920e6.xlsx]

## Sheet: Sheet1
gene	logFC	AveExpr	t	P.Value	adj.P.Val	B
GZMK	-0.415238	9.42617	-4.99181	1.32416e-06	0.0158475	4.59341
RETN	0.251624	5.77464	4.96694	1.48399e-06	0.0158475	4.49834
MAFG	0.206533	6.63334	4.74086	4.10346e-06	0.0292139	3.65065
FAM110B	0.159433	4.48195	4.51561	1.09253e-05	0.0514484	2.83624
GPR18	-0.238286	10.0686	-4.49273	1.20443e-05	0.0514484	2.75526
TDRD9	0.491694	6.75311	4.44013	1.50502e-05	0.0535738	2.5703
MMP8	0.631777	4.10203	4.39524	1.81748e-05	0.0554539	2.4138
MTARC1	0.348064	8.40865	4.3554	2.14617e-05	0.0572973	2.27597
GRB10	0.324022	5.99447	4.28671	2.85095e-05	0.0676562	2.0407
HK2	0.240567	9.61555	4.21471	3.82557e-05	0.0817065	1.79732
CAPNS2	0.296614	4.0149	4.15478	4.87273e-05	0.0938378	1.59728
APCDD1	0.203706	4.46746	4.12628	5.46197e-05	0.0938378	1.50297
TRAV16	-0.20545	3.69936	-4.11508	5.71164e-05	0.0938378	1.46605
GPR171	-0.243433	10.2389	-4.06397	6.99579e-05	0.102715	1.29865
ANXA2R-AS1	-0.247625	6.8248	-4.0562	7.2138e-05	0.102715	1.27333
IRAK3	0.295918	8.21873	4.01715	8.41021e-05	0.112266	1.14678
LOC101928317	0.225021	4.45137	3.99432	9.19483e-05	0.11552	1.07327
CACNB2	-0.15529	4.85059	-3.94601	0.00011091	0.124916	0.918841
ZNF37BP	-0.205706	5.57683	-3.93201	0.000117063	0.124916	0.874397
TRAV5	-0.304472	6.23509	-3.90759	0.000128586	0.124916	0.797149
ITM2A	-0.199754	9.16513	-3.90739	0.000128684	0.124916	0.796527
IKZF3	-0.235089	6.87143	-3.90708	0.000128836	0.124916	0.795553
TIMP2	0.151824	10.6387	3.89468	0.000135105	0.124916	0.756475
PFKFB2	0.15432	4.69714	3.88468	0.000140368	0.124916	0.725054
CKAP4	0.13859	7.85327	3.77684	0.000210958	0.180226	0.390491
KLRB1	-0.265683	9.91349	-3.7556	0.000228351	0.182441	0.325524
SH2D1A	-0.230512	6.84845	-3.75292	0.000230636	0.182441	0.317363
OLFM4	1.02551	6.93173	3.73142	0.000249794	0.190539	0.251965
STX17	-0.146424	6.29698	-3.70138	0.000279095	0.203674	0.161122
PYHIN1	-0.296344	7.39989	-3.67864	0.000303399	0.203674	0.092778
CD3G	-0.238711	9.33064	-3.66085	0.000323791	0.203674	0.0395619
DCAF16	-0.172076	6.34599	-3.65764	0.000327611	0.203674	0.0299688
KLRC4-KLRK1	-0.338836	7.84082	-3.65518	0.000330566	0.203674	0.0226267
PMPCB	-0.133082	7.73965	-3.6535	0.000332593	0.203674	0.0176274
TPST1	0.343765	5.92154	3.63836	0.00035143	0.203674	-0.027415
ZNF134	-0.137521	5.90139	-3.62912	0.000363414	0.203674	-0.0548194
PMS2P5	-0.140521	7.34507	-3.61615	0.000380889	0.203674	-0.0931942
YME1L1	-0.116862	8.20566	-3.61241	0.000386074	0.203674	-0.104241
KLRG1	-0.348582	6.71193	-3.61225	0.0003863	0.203674	-0.104718
IL7R	-0.197632	10.6062	-3.60975	0.000389802	0.203674	-0.112089
PRORSD1P	-0.235499	4.68222	-3.60891	0.000390984	0.203674	-0.114562
HPR	0.204706	6.00769	3.59992	0.000403878	0.205382	-0.141061
CEACAM8	0.768757	8.64369	3.58953	0.000419271	0.208251	-0.171599
RPL9	-0.259939	11.2018	-3.58142	0.000431653	0.209528	-0.195356
RORA	-0.185765	6.77543	-3.56552	0.000456979	0.216892	-0.241879
PLOD2	0.267689	3.5807	3.55007	0.000482892	0.224209	-0.286867
KLHL20	-0.138956	4.22062	-3.52784	0.000522642	0.224989	-0.351351
FKBP5	0.238158	9.3608	3.52346	0.00053081	0.224989	-0.363988
KMT2A	-0.137345	6.69909	-3.51716	0.00054279	0.224989	-0.382171
KCNE1	0.205409	4.27319	3.51384	0.000549218	0.224989	-0.391762
ARL4C	-0.13769	8.62906	-3.50722	0.000562218	0.224989	-0.410818
PTX3	0.41845	4.55726	3.49756	0.000581725	0.224989	-0.438593
TSPAN4	0.162328	5.03142	3.49127	0.000594749	0.224989	-0.456619
CCT2	-0.162947	8.22526	-3.48945	0.000598567	0.224989	-0.461828
TAF11	-0.133071	7.97626	-3.48891	0.000599713	0.224989	-0.463385
ERAP2	-0.298411	6.19196	-3.4887	0.000600167	0.224989	-0.464
MGST1	0.178836	5.7726	3.48393	0.000610321	0.224989	-0.477655
NDST1	0.182285	5.95163	3.48246	0.000613463	0.224989	-0.481835
DAO	-0.138259	3.38392	-3.47272	0.000634799	0.224989	-0.509655
KLF12	-0.162038	5.71949	-3.47057	0.000639604	0.224989	-0.515789
CEACAM6	0.536711	4.69353	3.46667	0.000648414	0.224989	-0.526918
TSHZ3	0.251433	7.156	3.4646	0.000653118	0.224989	-0.532798
FZD5	0.16744	3.95114	3.4471	0.00069431	0.226517	-0.582533
FCER1A	-0.236966	6.22629	-3.44177	0.000707307	0.226517	-0.597609
CHIC1	-0.146691	4.46115	-3.44109	0.000708982	0.226517	-0.599531
CLUHP3	-0.164249	6.23371	-3.43803	0.000716574	0.226517	-0.608188
PLBD1	0.230035	9.39071	3.43297	0.000729298	0.226517	-0.622492
CORO1C	0.133506	10.1988	3.43289	0.000729502	0.226517	-0.622719
SIPA1L2	0.269045	7.19991	3.42938	0.000738462	0.226517	-0.632638
DOCK8-AS1	0.176426	3.65657	3.42551	0.000748447	0.226517	-0.64355
LTB4R	0.207334	7.1113	3.41742	0.000769734	0.226517	-0.666331
IGF1R	0.154127	6.20138	3.41566	0.000774454	0.226517	-0.671296
XPO1	-0.154383	9.49753	-3.41417	0.000778448	0.226517	-0.675474
TTC36	0.15551	5.00774	3.40899	0.000792534	0.226517	-0.690036
SLC25A28	-0.108014	8.06446	-3.40793	0.000795428	0.226517	-0.692996
ATF7IP2	-0.176628	7.38473	-3.40254	0.000810387	0.22774	-0.708122
CHIT1	0.201778	5.03255	3.39434	0.000833618	0.228681	-0.731064
ELAC1	-0.164085	5.51826	-3.391	0.000843274	0.228681	-0.74041
CLEC3B	0.17733	4.40433	3.39011	0.000845855	0.228681	-0.74289
APH1B	0.0992744	7.90537	3.38397	0.000863931	0.230648	-0.760047
EPHB2	0.100484	4.23451	3.36588	0.000919249	0.241452	-0.810386
CEP68	-0.102604	7.35595	-3.3607	0.000935677	0.241452	-0.824747
HLA-DPB1	-0.268932	8.84849	-3.35159	0.000965261	0.241452	-0.849978
VCAN	0.185735	10.1426	3.35132	0.00096615	0.241452	-0.850725
ARG1	0.266494	4.50751	3.34628	0.000982879	0.241452	-0.864637
CRYGS	-0.220203	5.27	-3.34555	0.000985345	0.241452	-0.866667
PLD1	0.111426	4.34123	3.34345	0.000992411	0.241452	-0.872457
SLC28A3	0.158522	3.37053	3.34274	0.000994838	0.241452	-0.874435
SPINK2	-0.2056	4.65462	-3.3344	0.00102346	0.244434	-0.897412
TRGC2	-0.214772	7.47398	-3.33252	0.00103002	0.244434	-0.902585
S100A12	0.314511	10.7544	3.31697	0.00108582	0.254845	-0.945305
LCN2	0.720555	8.07616	3.31076	0.00110887	0.257428	-0.962311
NACC2	0.107952	7.34401	3.29823	0.00115676	0.260709	-0.996517
PNPLA2	0.149847	7.45668	3.29354	0.00117519	0.260709	-1.00931
EVL	-0.149878	8.59462	-3.29033	0.00118794	0.260709	-1.01804
MED1	-0.0983225	8.00305	-3.28915	0.00119269	0.260709	-1.02126
RORA-AS1	-0.291785	6.1945	-3.28807	0.00119701	0.260709	-1.02418
CNOT9	-0.097592	5.42041	-3.2843	0.0012123	0.260709	-1.03445
MIR4458HG	-0.152503	3.8018	-3.28195	0.00122192	0.260709	-1.04084
DLGAP3	0.160375	5.1437	3.28115	0.0012252	0.260709	-1.043
ATP11A	0.0966435	5.98676	3.27929	0.00123287	0.260709	-1.04805
PTS	-0.237696	5.58885	-3.26764	0.00128195	0.267963	-1.0796
NARF	0.198429	8.36412	3.26438	0.00129603	0.267963	-1.08843
BPI	0.559283	7.00556	3.26158	0.00130823	0.267963	-1.096
TRAC	-0.126498	11.5607	-3.25848	0.00132185	0.267963	-1.10436
HSPH1	-0.179324	7.00252	-3.25666	0.0013299	0.267963	-1.10927
GADD45A	0.268082	7.80162	3.25377	0.00134276	0.268025	-1.11704
DCBLD2	0.100399	4.44768	3.24944	0.00136232	0.269412	-1.12872
KCNA3	-0.284953	6.30127	-3.24233	0.00139496	0.273336	-1.14784
TCN1	0.411182	6.51752	3.23299	0.00143895	0.277515	-1.1729
SRSF7	-0.116138	7.43418	-3.23229	0.00144228	0.277515	-1.17476
IFNGR2	0.115682	10.807	3.22592	0.00147307	0.280909	-1.19181
ZNF141	-0.144435	6.11198	-3.21143	0.00154541	0.288522	-1.23048
PLTP	0.208639	4.49448	3.21028	0.0015513	0.288522	-1.23355
PWP1	-0.125552	7.19433	-3.20985	0.00155352	0.288522	-1.2347
LTF	0.694637	8.04539	3.20051	0.00160212	0.293858	-1.25953
LINC02481	-0.272516	7.2685	-3.19629	0.00162453	0.293858	-1.27073
PLXDC2	0.161133	7.73803	3.19539	0.00162934	0.293858	-1.27311
SYTL2	-0.282881	5.46595	-3.19392	0.00163728	0.293858	-1.27703
VEGFC	0.163819	3.9191	3.18921	0.0016628	0.295951	-1.28949
FAM131B-AS2	0.128977	6.39934	3.17725	0.00172938	0.296815	-1.32111
SOCS2-AS1	0.182158	3.10845	3.17461	0.00174435	0.296815	-1.32806
A2M-AS1	-0.322253	7.74485	-3.17269	0.00175538	0.296815	-1.33313
PRKAB2	-0.149487	5.83153	-3.17144	0.00176257	0.296815	-1.33642
BCL7A	-0.182252	5.79211	-3.17123	0.00176377	0.296815	-1.33697
EMILIN2	0.11893	6.72635	3.17088	0.00176579	0.296815	-1.33789
RASGRP4	0.0998466	8.64872	3.16874	0.00177823	0.296815	-1.34354
LINC01004	0.102918	5.33672	3.16863	0.00177884	0.296815	-1.34382
CSRP3	0.165163	3.51615	3.16421	0.00180471	0.298799	-1.35544
EIF4B	-0.093434	11.1858	-3.15431	0.00186395	0.305173	-1.38143
POLR2J4	-0.137086	7.42149	-3.14805	0.00190233	0.305173	-1.39783
HP	0.225203	5.59933	3.1425	0.00193699	0.305173	-1.41235
LHFPL2	0.204187	8.28051	3.13647	0.00197524	0.305173	-1.42807
HAX1	-0.142968	7.27467	-3.13507	0.00198426	0.305173	-1.43174
TNIK	-0.168264	6.38186	-3.13425	0.00198957	0.305173	-1.43389
TRA2A	-0.119286	8.17251	-3.13112	0.00200982	0.305173	-1.44203
RNF144B	0.148109	7.03481	3.13091	0.00201122	0.305173	-1.44259
GAS5	-0.155877	7.76004	-3.1283	0.0020283	0.305173	-1.44938
CRISP3	0.545505	4.9542	3.12324	0.00206178	0.305173	-1.46254
XYLT1	0.122419	6.95954	3.12283	0.00206451	0.305173	-1.4636
PSTPIP2	0.15413	10.3059	3.12275	0.00206504	0.305173	-1.46381
TUBGCP5	-0.147758	6.31885	-3.1224	0.00206738	0.305173	-1.46472
LYAR	-0.133616	8.53699	-3.12239	0.0020674	0.305173	-1.46473
TMEM121B	0.259033	8.35311	3.11839	0.00209435	0.305173	-1.47513
PCSK7	-0.131499	8.83852	-3.118	0.00209696	0.305173	-1.47613
ASPH	0.178101	4.78531	3.11794	0.00209736	0.305173	-1.47629
OLFML2A	0.152254	4.35455	3.11664	0.0021062	0.305173	-1.47967
ZC3H15	-0.133359	5.66593	-3.11539	0.00211469	0.305173	-1.4829
LINC00269	0.135771	3.22702	3.10996	0.00215204	0.308479	-1.49696
LINC02555	0.244747	3.31525	3.10482	0.00218797	0.311537	-1.51025
MSRB3	0.110164	4.19574	3.1013	0.00221291	0.313002	-1.51936
TM6SF1	0.231619	8.13622	3.09309	0.00227207	0.319256	-1.54053
EOMES	-0.2002	10.5127	-3.08921	0.00230053	0.319545	-1.55052
AAK1	-0.120762	5.86291	-3.08791	0.00231016	0.319545	-1.55387
EPOR	0.0927163	6.20089	3.08544	0.00232854	0.319545	-1.56023
LYRM2	-0.119954	5.75952	-3.08471	0.00233398	0.319545	-1.5621
RNF175	0.204691	9.52524	3.08136	0.00235912	0.320308	-1.5707
ABCD2	-0.278316	3.56372	-3.07998	0.00236954	0.320308	-1.57423
TRGV9	-0.290958	9.19707	-3.07465	0.00241033	0.321633	-1.58792
TRIM71	0.253797	5.06787	3.07036	0.00244355	0.321633	-1.5989
NKAPD1	-0.124698	5.60831	-3.07017	0.00244507	0.321633	-1.5994
ICAM5	0.136537	5.28418	3.06985	0.00244753	0.321633	-1.6002
CLOCK	-0.118307	5.26548	-3.06813	0.00246101	0.321633	-1.6046
C1RL	0.165898	7.05619	3.06533	0.00248309	0.321633	-1.61177
EAPP	-0.1161	9.71612	-3.06388	0.00249461	0.321633	-1.61548
MIS18A	-0.14793	6.77014	-3.06293	0.00250213	0.321633	-1.61789
TNS2	0.149371	5.73166	3.05908	0.00253304	0.321633	-1.62773
LOC101928373	-0.229453	3.03677	-3.05447	0.00257044	0.321633	-1.63947
ALOX15B	0.1468	3.86572	3.05338	0.00257936	0.321633	-1.64225
RNASE1	0.161578	3.82916	3.05268	0.00258505	0.321633	-1.64401
LARS1	-0.100312	8.28666	-3.05216	0.00258937	0.321633	-1.64535
FAM209B	0.159262	6.81374	3.05147	0.00259503	0.321633	-1.6471
NPIPB3	-0.140369	7.38571	-3.04951	0.00261128	0.321633	-1.6521
NME7	-0.163102	7.52309	-3.04783	0.00262525	0.321633	-1.65637
LMX1B	0.121226	4.98296	3.04569	0.00264314	0.321633	-1.66181
NDUFS4	-0.145929	7.09486	-3.04432	0.00265462	0.321633	-1.66529
PPP1R17	-0.312868	4.31748	-3.04303	0.00266547	0.321633	-1.66855
AMPD3	0.100909	6.81608	3.04104	0.00268238	0.321856	-1.67362
DEFA4	0.666466	7.32625	3.03547	0.00273005	0.325261	-1.68772
UBTD1	0.144087	5.71253	3.03354	0.00274684	0.325261	-1.69263
CDK5R1	0.146492	5.9831	3.03243	0.00275645	0.325261	-1.69542
STK38	-0.0806191	7.47552	-3.03041	0.00277413	0.325549	-1.70054
ELANE	0.298521	3.82063	3.02515	0.0028206	0.327712	-1.71384
OTUD3	-0.198308	6.5605	-3.02485	0.00282325	0.327712	-1.71459
SNHG1	-0.153257	9.44836	-3.01872	0.00287833	0.328699	-1.73004
TULP4	-0.129449	6.32821	-3.01845	0.00288083	0.328699	-1.73074
SSB	-0.121495	9.36173	-3.01795	0.0028854	0.328699	-1.73201
HSP90AA1	-0.11384	10.8768	-3.01708	0.00289331	0.328699	-1.7342
RRN3P1	-0.189592	5.8269	-3.00754	0.00298145	0.333848	-1.75819
MAP3K15	-0.274343	5.0498	-3.00701	0.00298643	0.333848	-1.75953
CEBPA	0.194266	7.33293	3.00678	0.00298858	0.333848	-1.7601
TRGV5	-0.146502	5.63763	-3.00432	0.00301175	0.333848	-1.76628
CLEC1B	0.257755	7.45662	3.00216	0.00303226	0.333848	-1.7717
FUCA1	0.125675	6.34226	3.00129	0.00304053	0.333848	-1.77388
RHD	0.203621	6.36733	2.99972	0.00305555	0.333848	-1.77782
FGF9	-0.186587	3.47848	-2.99887	0.00306369	0.333848	-1.77994
RTTN	-0.111223	4.46403	-2.99489	0.00310214	0.335954	-1.78991
SRRM2	-0.110341	8.11548	-2.99295	0.00312104	0.335954	-1.79476
MAPDA	-0.104253	3.70635	-2.98934	0.00315646	0.335954	-1.80378
GP6	0.251628	4.26206	2.9866	0.00318363	0.335954	-1.81063
FCAR	0.132571	5.42599	2.9858	0.0031916	0.335954	-1.81262
GPR174	-0.254008	4.99017	-2.98431	0.00320652	0.335954	-1.81635
NUP205	-0.118008	6.55679	-2.98425	0.00320704	0.335954	-1.81648
RAD51D	-0.129467	5.63542	-2.98121	0.00323764	0.335954	-1.82406
SORT1	0.148973	6.30214	2.98036	0.00324628	0.335954	-1.82619
MS4A7	-0.215773	8.30037	-2.97871	0.00326299	0.335954	-1.83029
WDR73	-0.0941117	6.88166	-2.97835	0.00326668	0.335954	-1.83119
RPLP0	-0.194294	10.972	-2.97738	0.00327654	0.335954	-1.8336
TARP	-0.272656	9.89084	-2.97631	0.00328749	0.335954	-1.83626
TMEM50B	-0.123342	7.76106	-2.97351	0.00331634	0.337287	-1.84324
PGM5	0.207222	3.96197	2.968	0.00337372	0.338661	-1.85693
TRPM2	0.158331	4.66158	2.96798	0.00337397	0.338661	-1.85699
PLEKHA1	-0.213959	7.65669	-2.96748	0.00337913	0.338661	-1.85821
RPAIN	-0.0912325	5.79649	-2.96614	0.00339327	0.338661	-1.86154
RAB13	0.241247	6.5635	2.95981	0.00346062	0.343777	-1.87722
TGFBR3	-0.234226	7.756	-2.95553	0.00350698	0.34567	-1.88783
KCTD7	-0.0879306	6.68767	-2.95202	0.00354533	0.34567	-1.89651
ABAT	0.172176	7.56812	2.95142	0.00355189	0.34567	-1.89798
NUDT16-DT	0.163769	4.26942	2.9489	0.00357973	0.34567	-1.90421
RANBP17	0.103927	3.69003	2.94838	0.00358545	0.34567	-1.90548
AIRE	0.128373	4.88919	2.947	0.00360082	0.34567	-1.90889
MRPS10	-0.12906	6.65401	-2.94611	0.00361076	0.34567	-1.91109
SKIC8	-0.131374	6.68475	-2.94146	0.00366306	0.34567	-1.92255
ADORA3	0.259534	5.54584	2.94001	0.00367941	0.34567	-1.9261
KREMEN1	0.152241	5.43852	2.93513	0.00373534	0.34567	-1.93812
SLC66A2	0.108499	7.01617	2.93409	0.00374734	0.34567	-1.94068
DLGAP4-AS1	-0.143658	5.25374	-2.93285	0.0037616	0.34567	-1.9437
GPD2	0.116731	6.69833	2.93282	0.00376194	0.34567	-1.94378
TRAV12-2	-0.220645	5.70736	-2.93276	0.00376272	0.34567	-1.94394
TRIP11	-0.111765	5.75402	-2.93158	0.00377642	0.34567	-1.94684
ARHGEF11	0.108135	5.71077	2.93148	0.00377761	0.34567	-1.94709
ADGRB3-DT	0.234312	4.36758	2.93131	0.00377958	0.34567	-1.9475
CHST13	0.180371	5.73254	2.93016	0.00379299	0.34567	-1.95032
OSGEPL1	-0.183325	6.83669	-2.92959	0.00379961	0.34567	-1.95171
PCDHB3	0.10701	2.95594	2.92927	0.00380338	0.34567	-1.9525
OCIAD2	-0.145937	9.01136	-2.92749	0.00382427	0.346097	-1.95687
THEM4	-0.1884	7.20649	-2.92608	0.00384085	0.34613	-1.96031
PRLH	0.142126	5.11821	2.92387	0.00386712	0.347033	-1.96574
APMAP	0.118301	11.3743	2.922	0.0038894	0.347573	-1.97032
AFG2A	-0.128974	4.2022	-2.91255	0.00400389	0.35396	-1.99341
CEP95	-0.121586	6.01342	-2.91194	0.00401139	0.35396	-1.9949
ZNF709	-0.105049	5.01271	-2.91133	0.00401893	0.35396	-1.99639
CADM2-AS1	-0.116457	2.49126	-2.91045	0.00402972	0.35396	-1.99853
OLAH	0.266258	3.61393	2.9092	0.00404521	0.35396	-2.00158
EXOSC7	-0.117341	7.80079	-2.90796	0.00406057	0.35396	-2.0046
FAM226A	-0.292407	6.79477	-2.90665	0.00407689	0.35396	-2.00779
ODAM	0.117246	3.61209	2.90282	0.00412502	0.354753	-2.01713
NSG1	-0.23216	6.21673	-2.90179	0.00413802	0.354753	-2.01963
WIPI1	0.160653	7.97437	2.90134	0.00414372	0.354753	-2.02072
MAML3	0.116659	5.98534	2.90065	0.00415246	0.354753	-2.0224
ZNF527	-0.165594	5.86593	-2.89915	0.00417146	0.354956	-2.02603
TMCO3	0.134306	5.98216	2.89519	0.00422221	0.357021	-2.03565
ORC5	-0.109474	4.71544	-2.89466	0.00422916	0.357021	-2.03695
GALNT11	-0.151407	7.65689	-2.89048	0.00428343	0.360145	-2.04709
PDXDC1	-0.0798614	5.02292	-2.88922	0.00429988	0.360145	-2.05014
REPS1	-0.0858574	5.89806	-2.88266	0.00438665	0.365976	-2.06602
USP32	0.0997255	7.83998	2.87964	0.00442712	0.366547	-2.07332
LOC100506639	-0.156832	4.00631	-2.87863	0.00444073	0.366547	-2.07576
SIRPB1	0.114643	7.3934	2.87831	0.00444496	0.366547	-2.07651
CD1C	-0.225675	8.18312	-2.87482	0.00449232	0.368546	-2.08493
DEFA1	0.465353	11.9312	2.87399	0.00450372	0.368546	-2.08695
IQCB1	-0.166124	6.72889	-2.87261	0.00452258	0.368677	-2.09027
ZNF610	-0.132186	2.59684	-2.86372	0.00464618	0.377312	-2.11167
SUGP2	-0.0907817	7.67254	-2.8622	0.00466754	0.377611	-2.11532
ANKS1A	0.131951	7.49295	2.85955	0.00470506	0.377859	-2.12167
FSCN1	0.11858	6.66929	2.85759	0.00473312	0.377859	-2.12639
SLC35D1	-0.112439	5.96119	-2.85728	0.00473749	0.377859	-2.12712
MAML1	0.138658	8.41599	2.85632	0.00475133	0.377859	-2.12944
TMEM106C	-0.115395	5.4928	-2.85578	0.00475907	0.377859	-2.13073
EML6	-0.173874	4.16003	-2.85295	0.00479979	0.379681	-2.13749
TTYH3	0.131093	6.90624	2.84792	0.0048733	0.381022	-2.14955
TIMM10B	-0.113053	8.20854	-2.8475	0.00487946	0.381022	-2.15055
ZCCHC24	0.131935	6.19625	2.84497	0.00491681	0.381022	-2.1566
ST3GAL6	0.174399	6.40808	2.84402	0.00493087	0.381022	-2.15887
ZNF22	-0.188122	7.10539	-2.84237	0.00495535	0.381022	-2.16279
ATXN1L	0.138025	8.10854	2.8417	0.00496534	0.381022	-2.16439
DCAF1	-0.103001	6.05452	-2.8409	0.0049773	0.381022	-2.1663
FBXO27	0.119546	2.75893	2.83944	0.00499927	0.381022	-2.16979
TKFC	0.108943	5.31021	2.83803	0.00502047	0.381022	-2.17314
FCHSD2	0.116141	9.24673	2.83801	0.00502084	0.381022	-2.1732
CD8A	-0.203879	10.9572	-2.83799	0.0050211	0.381022	-2.17324
NFATC2IP	-0.0805696	7.64138	-2.8367	0.00504065	0.381022	-2.17632
RAB30-DT	-0.224182	5.90937	-2.83581	0.0050541	0.381022	-2.17844
ORM2	0.295887	5.26818	2.83284	0.00509943	0.381022	-2.18551
SNRPN	-0.0824306	4.60169	-2.83082	0.0051304	0.381022	-2.19031
NONO	-0.0822544	9.61721	-2.83065	0.00513305	0.381022	-2.19072
KIF3C	0.170153	6.10018	2.82976	0.00514675	0.381022	-2.19284
MAP3K21	0.186608	3.77821	2.82718	0.00518668	0.381022	-2.19896
MARVELD1	0.110364	6.18315	2.82601	0.00520501	0.381022	-2.20175
RNF130	0.100759	6.20011	2.81999	0.00529968	0.381022	-2.21603
CLEC4E	0.182225	9.62919	2.81944	0.00530838	0.381022	-2.21733
TNFSF13	0.158605	7.73357	2.81943	0.00530849	0.381022	-2.21735
JOSD1	-0.120798	8.67672	-2.81898	0.00531568	0.381022	-2.21842
AGTRAP	0.161434	8.17144	2.81892	0.00531664	0.381022	-2.21856
PPM1K	-0.145913	8.5587	-2.81622	0.00535973	0.381022	-2.22496
CLYBL-AS2	-0.197793	3.79965	-2.81585	0.00536567	0.381022	-2.22583
CLEC5A	0.321486	5.69079	2.81413	0.00539327	0.381022	-2.2299
DKKL1	0.136781	3.91318	2.81392	0.00539671	0.381022	-2.2304
CHGA	0.136093	3.95137	2.81303	0.00541098	0.381022	-2.23249
RRAGD	0.169157	7.96914	2.81303	0.005411	0.381022	-2.2325
CES1	0.326365	8.05271	2.81254	0.00541892	0.381022	-2.23365
FARS2-AS1	-0.124549	3.03347	-2.81234	0.00542213	0.381022	-2.23412
XCL1	-0.156524	5.45017	-2.81189	0.00542947	0.381022	-2.23519
CD163	0.21653	7.48293	2.81184	0.00543037	0.381022	-2.23532
MPO	0.2487	5.01143	2.81117	0.00544113	0.381022	-2.23689
VDR	0.1176	6.43558	2.80849	0.0054849	0.381119	-2.24323
CLIC4	0.163121	6.80469	2.80532	0.00553696	0.381119	-2.25071
FAM111A-DT	-0.148999	5.28188	-2.80436	0.00555278	0.381119	-2.25297
LINC00644	0.112353	2.49987	2.80264	0.00558139	0.381119	-2.25704
ST3GAL2	0.0895051	7.3741	2.80253	0.00558319	0.381119	-2.25729
ABCC2	0.196142	4.86683	2.8024	0.00558535	0.381119	-2.2576
CYBRD1	0.242762	6.79307	2.80186	0.00559425	0.381119	-2.25886
SNRNP40	-0.181181	7.56731	-2.80029	0.00562058	0.381119	-2.26257
SH2B2	0.151504	4.62921	2.79685	0.00567833	0.381119	-2.27066
USP13	-0.11784	5.80324	-2.79658	0.00568288	0.381119	-2.27129
CDKL5	0.129731	4.63991	2.79591	0.00569426	0.381119	-2.27288
RPS3A	-0.277744	11.2588	-2.79554	0.00570054	0.381119	-2.27375
DHX9	-0.0826233	8.04367	-2.7953	0.00570463	0.381119	-2.27431
CLEC12B	0.354849	4.58681	2.79511	0.00570786	0.381119	-2.27476
CABP7	0.100589	4.94783	2.79497	0.00571018	0.381119	-2.27508
ITGA2B	0.241054	5.43994	2.79156	0.00576836	0.383417	-2.2831
EPRS1	-0.117184	7.63008	-2.79085	0.00578052	0.383417	-2.28477
AGFG1	0.107508	6.47578	2.78976	0.0057992	0.383465	-2.28732
FAM111A	-0.118082	7.36304	-2.78782	0.00583259	0.384483	-2.29186
SYCE3	0.103368	3.70143	2.78606	0.00586318	0.38531	-2.29599
TK2	0.0994771	7.48207	2.78424	0.00589496	0.385854	-2.30027
RSPH9	0.232556	4.39821	2.78111	0.00594972	0.385854	-2.30758
REPS2	0.204855	8.39077	2.77932	0.00598147	0.385854	-2.31178
MCM8	-0.0972227	4.53142	-2.7779	0.00600656	0.385854	-2.31509
EGF	0.328702	5.11995	2.77512	0.00605621	0.385854	-2.32159
LOC100132249	0.105978	3.7985	2.77505	0.00605739	0.385854	-2.32175
HDAC4	0.0854083	8.10968	2.77384	0.00607909	0.385854	-2.32457
FHIP2A	0.136008	6.75313	2.77355	0.0060843	0.385854	-2.32525
WDR59	-0.101723	5.59928	-2.77247	0.00610376	0.385854	-2.32777
TOLLIP	0.104945	6.97325	2.77145	0.00612226	0.385854	-2.33016
TMEM45A	0.334009	4.35674	2.77084	0.00613324	0.385854	-2.33158
TRIB2	-0.15461	8.118	-2.77067	0.00613639	0.385854	-2.33198
SMKR1	-0.211339	4.02246	-2.76982	0.00615177	0.385854	-2.33396
FGD4	0.195943	6.43928	2.76873	0.00617154	0.385854	-2.33649
SERPINB2	0.339017	4.52014	2.76835	0.00617856	0.385854	-2.33739
ANKRD36	-0.154061	6.53107	-2.76677	0.00620725	0.385854	-2.34105
KDM7A	0.148725	9.27263	2.76593	0.00622275	0.385854	-2.34302
PRKACB	-0.19372	6.9989	-2.76583	0.00622449	0.385854	-2.34324
PROC	0.124094	4.4361	2.7656	0.0062288	0.385854	-2.34379
GSN	0.102962	5.2689	2.76419	0.00625468	0.385854	-2.34706
LY9	-0.159146	7.74304	-2.76367	0.00626435	0.385854	-2.34828
TRPM7	-0.117768	6.61073	-2.76342	0.00626891	0.385854	-2.34886
SOCS1	0.110181	5.61492	2.76239	0.00628797	0.385915	-2.35125
CRAT	0.1981	6.40202	2.75574	0.00641217	0.39241	-2.36669
SKAP1-AS2	-0.279944	9.30158	-2.75385	0.006448	0.393476	-2.37109
BOLA2	-0.0969352	8.18871	-2.75183	0.00648639	0.394512	-2.37577
SEPTIN11	-0.106071	5.89171	-2.75053	0.00651123	0.394512	-2.37879
MARCO	0.216329	5.8489	2.75005	0.00652041	0.394512	-2.3799
LOC729218	0.131515	9.90707	2.74759	0.00656768	0.39625	-2.3856
IFT56	0.149108	3.21293	2.74644	0.0065898	0.396346	-2.38825
SLC6A12-AS1	0.107756	4.69092	2.74305	0.00665554	0.396346	-2.39608
HSD3B7	0.225273	5.78947	2.74261	0.00666423	0.396346	-2.39711
MYL9	0.173745	5.63677	2.74228	0.0066706	0.396346	-2.39786
TNNT1	0.350497	4.81566	2.74175	0.00668109	0.396346	-2.3991
SLAMF6	-0.132584	9.22119	-2.74171	0.0066818	0.396346	-2.39919
NLRC4	0.126482	6.20476	2.74082	0.00669917	0.396346	-2.40123
TRAV12-3	-0.245036	8.14327	-2.73751	0.00676437	0.399098	-2.40887
HOMER3	0.107384	5.22826	2.73539	0.00680646	0.400475	-2.41376
PROS1	0.410012	6.24084	2.73406	0.00683305	0.400935	-2.41683
HINT1	-0.165171	8.84689	-2.72879	0.00693899	0.404785	-2.42896
MAOA	0.185485	3.40852	2.72806	0.00695379	0.404785	-2.43064
UBAC2-AS1	-0.108511	2.64365	-2.72798	0.00695552	0.404785	-2.43083
SLC16A3	0.129282	7.33525	2.72599	0.0069959	0.406028	-2.43539
SUPV3L1	-0.129102	8.74497	-2.72359	0.00704503	0.407321	-2.44091
RASL12	0.125581	3.73102	2.72304	0.00705631	0.407321	-2.44217
SRPK1	0.155801	8.62503	2.718	0.00716069	0.41129	-2.45373
DDX17	-0.142033	9.16725	-2.71786	0.00716359	0.41129	-2.45405
ZNF286A	-0.0880727	5.96482	-2.71683	0.00718503	0.411415	-2.4564
SKAP1	-0.183017	8.78903	-2.71453	0.00723321	0.412503	-2.46167
PDCD6P1	-0.168254	6.0716	-2.71379	0.00724877	0.412503	-2.46336
UTP20	-0.148187	6.32142	-2.71317	0.00726197	0.412503	-2.46479
ELP2	-0.103015	6.42786	-2.71149	0.00729744	0.413343	-2.46863
RPF2	-0.145342	7.13768	-2.70761	0.00738001	0.413343	-2.47748
GTPBP8	-0.129855	7.09267	-2.70667	0.00740022	0.413343	-2.47963
CIMAP1B	0.124044	5.90607	2.7055	0.00742536	0.413343	-2.4823
FAM3B	-0.581896	4.59534	-2.70477	0.00744113	0.413343	-2.48397
SPEF1	0.104254	4.53199	2.70371	0.00746397	0.413343	-2.48638
GPR17	0.0969872	3.04497	2.70365	0.00746545	0.413343	-2.48654
GAPVD1	0.0790185	8.1059	2.70307	0.00747781	0.413343	-2.48784
SLC2A5	0.100258	4.32199	2.70281	0.00748349	0.413343	-2.48844
SP2-DT	-0.139053	5.31495	-2.70198	0.00750159	0.413343	-2.49034
CDH5	0.0978146	5.08615	2.70072	0.007529	0.413343	-2.49321
CACNA1E	0.114458	3.83302	2.70039	0.00753629	0.413343	-2.49397
MMP9	0.335367	9.45313	2.69977	0.00754965	0.413343	-2.49536
CATSPER2	-0.133588	5.10471	-2.69877	0.00757167	0.413343	-2.49765
TAF1A-AS1	-0.22004	4.08824	-2.69859	0.00757559	0.413343	-2.49806
MEIG1	0.10956	2.99071	2.69739	0.00760183	0.413343	-2.50078
SHTN1	0.289667	7.76351	2.69722	0.00760575	0.413343	-2.50119
CTSD	0.159299	8.11516	2.69551	0.00764327	0.413571	-2.50506
FKBP9	0.262116	7.91265	2.69479	0.00765935	0.413571	-2.50671
ERV3-2	0.335279	7.85578	2.6931	0.00769677	0.413571	-2.51054
CD48	-0.10327	8.66202	-2.69256	0.00770875	0.413571	-2.51176
SLC22A14	0.142213	3.83551	2.6917	0.00772792	0.413571	-2.51372
UBE2D3-AS1	-0.152548	5.23075	-2.69082	0.00774767	0.413571	-2.51572
CAMP	0.287052	7.93671	2.68957	0.00777557	0.413571	-2.51855
C19orf33	0.108362	4.78996	2.68837	0.00780265	0.413571	-2.52128
NUCKS1	-0.103687	8.88887	-2.68786	0.00781417	0.413571	-2.52244
RBM33-DT	-0.146058	6.18389	-2.68781	0.00781518	0.413571	-2.52254
STS	0.109323	4.7194	2.68747	0.00782295	0.413571	-2.52332
LOC100652999	0.105132	4.22437	2.68307	0.00792277	0.417814	-2.53329
NFATC3	-0.0856566	8.11693	-2.68196	0.00794822	0.418124	-2.53581
SYP	0.151424	5.64751	2.67638	0.00807679	0.42285	-2.54841
CCSER2	-0.0859285	6.13463	-2.67635	0.00807766	0.42285	-2.5485
SLC44A1	0.1214	6.99787	2.67503	0.00810821	0.423411	-2.55146
METTL16	-0.107288	5.93782	-2.67411	0.00812987	0.423507	-2.55356
LINC00968	0.123309	2.77712	2.66995	0.00822749	0.427549	-2.56293
ECE1	0.110891	6.65919	2.66891	0.00825215	0.42779	-2.56528
FAM149A	-0.121993	3.46685	-2.66609	0.0083191	0.430216	-2.57162
USP37	-0.0928942	7.70163	-2.66454	0.00835616	0.430594	-2.57511
KLHL13	0.120741	2.7027	2.6641	0.00836673	0.430594	-2.57611
GIMAP5	-0.147948	9.83449	-2.66292	0.0083951	0.431016	-2.57876
PGLYRP1	0.291024	7.3869	2.66102	0.00844087	0.431366	-2.58303
ARL8A	0.0920689	8.41806	2.66038	0.00845643	0.431366	-2.58447
PVR	0.0719274	4.91905	2.66013	0.00846252	0.431366	-2.58504
HSPA1L	0.098373	5.68814	2.65644	0.00855222	0.43437	-2.59331
RHOH	-0.175805	7.46983	-2.65566	0.00857125	0.43437	-2.59506
ILF3-DT	-0.204464	5.85719	-2.65521	0.00858246	0.43437	-2.59608
KRT82	0.109465	4.29225	2.65352	0.00862394	0.435438	-2.59986
FUT8	-0.214442	4.79174	-2.6526	0.0086466	0.435552	-2.60192
KLRK1-AS1	-0.139248	3.94577	-2.64973	0.00871789	0.43811	-2.60836
NRG1	0.172113	4.88427	2.64709	0.00878372	0.439517	-2.61426
COLGALT1	0.0803311	7.06193	2.64696	0.00878705	0.439517	-2.61456
NIPAL3	-0.115281	8.02561	-2.6442	0.0088563	0.440422	-2.62071
SMIM2	0.120257	2.83702	2.64382	0.00886601	0.440422	-2.62157
S100A2	0.11715	4.50504	2.64338	0.00887706	0.440422	-2.62254
SMAP2	0.0929213	11.6327	2.64296	0.00888763	0.440422	-2.62348
RBIS	-0.175226	7.45762	-2.64149	0.00892496	0.441248	-2.62676
ALAS2	0.203023	6.6608	2.63982	0.00896746	0.441259	-2.63049
ZBTB20	-0.101225	7.81147	-2.63849	0.00900161	0.441259	-2.63346
NCOA6	0.0906664	6.15853	2.63845	0.00900261	0.441259	-2.63355
ANAPC5	-0.0951525	7.13797	-2.63825	0.00900781	0.441259	-2.634
SIRPA	0.163157	8.85037	2.63576	0.0090717	0.443372	-2.63954
AQR	-0.083383	7.0747	-2.63359	0.00912789	0.445099	-2.64438
RAB3D	0.092478	7.40523	2.6325	0.00915603	0.445455	-2.64679
MEF2D	0.0777176	6.55248	2.63168	0.0091774	0.445479	-2.64862
RPL15	-0.0886072	9.48418	-2.62998	0.00922186	0.446622	-2.6524
TCF4	-0.156	7.51522	-2.62907	0.00924582	0.44677	-2.65443
UBALD1	0.0895017	4.55352	2.62598	0.00932717	0.44716	-2.66129
HAPSTR2	0.129647	3.02871	2.62559	0.00933744	0.44716	-2.66215
ZDHHC19	0.155487	5.22395	2.62533	0.00934432	0.44716	-2.66273
KIAA0319	0.184281	5.44398	2.6251	0.00935043	0.44716	-2.66324
THOC1	-0.147287	8.30091	-2.62479	0.00935858	0.44716	-2.66392
SLC6A4	0.101572	3.08316	2.62285	0.00941016	0.448621	-2.66823
S100B	-0.234618	3.65792	-2.62033	0.00947774	0.450836	-2.67383
YLPM1	-0.100604	7.33807	-2.61893	0.00951538	0.451094	-2.67693
IL10RA	-0.0988522	10.435	-2.61782	0.00954514	0.451094	-2.67937
AP4S1	-0.10843	5.26137	-2.61777	0.00954651	0.451094	-2.67949
CXCR6	-0.192643	6.16506	-2.61642	0.00958297	0.451097	-2.68247
EPHA4	-0.144611	5.43166	-2.61621	0.00958882	0.451097	-2.68295
DEFB124	0.0982411	3.55963	2.61409	0.00964628	0.452803	-2.68762
KLHL8	0.137114	7.03965	2.61317	0.00967161	0.452996	-2.68967
ERG	0.105428	3.39669	2.61135	0.00972129	0.454327	-2.69368
ZNF566	-0.213299	3.16842	-2.61055	0.00974322	0.454357	-2.69544
SERINC2	0.0900201	4.60975	2.60826	0.0098065	0.455031	-2.70051
HTRA1	0.180458	5.06521	2.60656	0.00985372	0.455031	-2.70426
TUBE1	-0.167871	4.42196	-2.60653	0.00985448	0.455031	-2.70432
ALDH3B1	0.107457	7.01819	2.60629	0.0098612	0.455031	-2.70486
ANO10	0.210821	5.80954	2.60618	0.00986419	0.455031	-2.70509
PIWIL4	0.194312	4.7409	2.60265	0.00996265	0.458104	-2.71286
RHCE	0.243999	5.06809	2.60173	0.00998865	0.458104	-2.71489
SMIM3	0.179261	6.46567	2.6015	0.00999516	0.458104	-2.7154
EVPL	0.11519	5.14211	2.59437	0.0101976	0.466248	-2.73107
KCNQ2	0.0830392	4.177	2.59258	0.0102488	0.466248	-2.73499
ECHDC2	-0.158457	7.56859	-2.59223	0.0102589	0.466248	-2.73576
PTGR3	-0.149529	6.53821	-2.59219	0.0102602	0.466248	-2.73585
PAK1IP1	-0.168802	6.64144	-2.58982	0.0103286	0.46805	-2.74105
RBMS2	0.118706	5.03689	2.5887	0.0103611	0.46805	-2.7435
BTN3A2	-0.252853	9.3249	-2.5882	0.0103756	0.46805	-2.74459
CDX4	0.114025	4.80075	2.58681	0.0104161	0.46805	-2.74763
PRIM1	-0.214166	5.6815	-2.58681	0.0104163	0.46805	-2.74765
PLAU	0.0975402	3.82867	2.58556	0.0104527	0.46805	-2.75037
TLR2	0.185901	10.0279	2.58555	0.0104532	0.46805	-2.75041
CYFIP1	0.144074	8.73381	2.58403	0.0104977	0.468831	-2.75373
LTBP1	0.220407	6.7186	2.58346	0.0105146	0.468831	-2.75498
FOLR3	0.553831	7.73464	2.58095	0.0105886	0.470303	-2.76045
LAIR2	-0.407382	5.92651	-2.58029	0.0106081	0.470303	-2.7619
ZMYM6	-0.120361	5.08016	-2.58011	0.0106136	0.470303	-2.7623
R3HDM1	-0.154814	7.41441	-2.57917	0.0106414	0.470557	-2.76434
TUBA3FP	-0.134806	3.19108	-2.57784	0.0106811	0.471004	-2.76725
TEFM	-0.113436	7.48635	-2.57726	0.0106985	0.471004	-2.76852
CYP1B1	0.192438	6.75117	2.57662	0.0107177	0.471004	-2.76991
ZCCHC7	-0.11726	8.13781	-2.57517	0.0107612	0.471461	-2.77308
ZKSCAN8	-0.0768148	4.9409	-2.5748	0.0107722	0.471461	-2.77388
FCRL3	-0.205725	7.50791	-2.57331	0.0108173	0.471863	-2.77714
CD200R1	-0.124803	3.31478	-2.57303	0.0108256	0.471863	-2.77773
KHK	0.0905334	4.4662	2.5715	0.010872	0.472107	-2.78107
FOSL1	0.104971	2.7575	2.57107	0.0108849	0.472107	-2.782
OLR1	0.272296	3.0782	2.56898	0.0109487	0.472107	-2.78656
CAMKK2	0.101996	7.05123	2.56829	0.0109699	0.472107	-2.78806
BRD7	-0.067001	7.40507	-2.56822	0.0109719	0.472107	-2.78821
PGM1	0.124096	9.08099	2.56781	0.0109845	0.472107	-2.7891
TBXAS1	0.15649	8.40581	2.567	0.0110093	0.472107	-2.79086
SBSN	0.108415	4.15053	2.56564	0.0110511	0.472107	-2.79381
PKP2	0.103996	3.74815	2.56502	0.0110704	0.472107	-2.79517
SEC31B	-0.160803	7.1721	-2.56238	0.0111519	0.472107	-2.80089
RUFY3	-0.094149	6.67567	-2.5612	0.0111886	0.472107	-2.80346
INTS14	-0.123642	5.26789	-2.56026	0.0112179	0.472107	-2.80549
GRIA1	0.0974925	2.75625	2.56018	0.0112205	0.472107	-2.80567
LINC03043	0.14082	2.66581	2.55961	0.0112382	0.472107	-2.8069
ZNF347	-0.158589	3.94556	-2.55863	0.0112689	0.472107	-2.80903
BRD9	-0.0896933	8.86645	-2.55814	0.0112841	0.472107	-2.81008
HGF	0.0973613	3.84228	2.55763	0.0113002	0.472107	-2.81119
SLC24A4	0.119593	7.32217	2.55703	0.0113192	0.472107	-2.8125
STK32B	0.110408	4.0469	2.55559	0.0113645	0.472107	-2.81561
FBXO32	-0.136986	5.35782	-2.5546	0.0113957	0.472107	-2.81774
IRS2	0.147956	10.729	2.55444	0.0114008	0.472107	-2.8181
HOXA11	0.108291	4.04663	2.55427	0.0114062	0.472107	-2.81846
TMEM144	0.116156	3.32033	2.55381	0.0114209	0.472107	-2.81947
NDUFAF5	-0.104822	5.01583	-2.5536	0.0114275	0.472107	-2.81992
TBL1Y	0.129604	4.47548	2.55107	0.011508	0.472107	-2.82539
SLC23A1	-0.17324	3.47779	-2.5505	0.0115261	0.472107	-2.82661
BCORL1	0.0781917	5.41893	2.55011	0.0115386	0.472107	-2.82746
EEF1A1	-0.0514586	11.0643	-2.54991	0.011545	0.472107	-2.82789
THBS1	0.183268	5.22955	2.54981	0.0115483	0.472107	-2.82811
DUSP5	-0.199086	7.22367	-2.54865	0.0115855	0.472107	-2.83061
TIGIT	-0.229377	6.56734	-2.54766	0.0116172	0.472107	-2.83274
LOC102724560	0.228608	6.29364	2.54726	0.0116301	0.472107	-2.83361
INTS7	-0.133033	5.55045	-2.54698	0.0116393	0.472107	-2.83422
B4GALT5	0.14498	10.7594	2.54679	0.0116455	0.472107	-2.83464
SLC22A15	0.228665	6.6102	2.54643	0.0116569	0.472107	-2.8354
ZNF789	-0.102648	5.55351	-2.54625	0.011663	0.472107	-2.8358
MAPK14	0.143069	8.81561	2.54577	0.0116782	0.472107	-2.83682
SATB1	-0.13846	6.52168	-2.54535	0.0116918	0.472107	-2.83773
ANKRD9	0.170152	4.8485	2.54531	0.0116933	0.472107	-2.83782
LRP3	0.102385	5.221	2.54452	0.0117187	0.472242	-2.83952
MRPL45	-0.0934081	6.72436	-2.54217	0.0117954	0.472772	-2.84459
C18orf21	-0.132638	5.56787	-2.54118	0.0118277	0.472772	-2.84673
LOC101928236	0.204831	4.31663	2.53937	0.011887	0.472772	-2.85062
MED7	-0.121274	6.66959	-2.53934	0.0118879	0.472772	-2.85068
HSPD1	-0.0793611	6.27862	-2.53906	0.0118973	0.472772	-2.85129
CD83	-0.172356	7.24142	-2.53886	0.0119039	0.472772	-2.85173
RPS16	-0.0738626	11.0405	-2.53827	0.0119232	0.472772	-2.85298
SELP	0.233255	7.55026	2.53721	0.0119582	0.472772	-2.85526
DSC2	0.242528	5.16529	2.53696	0.0119663	0.472772	-2.85579
C12orf57	-0.15974	7.90174	-2.53629	0.0119885	0.472772	-2.85724
SCAF4	-0.109889	7.47021	-2.53517	0.0120259	0.472772	-2.85966
SDAD1	-0.144878	8.42838	-2.53489	0.012035	0.472772	-2.86025
PEAR1	0.262697	6.22471	2.53432	0.0120541	0.472772	-2.86148
LUC7L	-0.100178	9.06133	-2.53355	0.0120797	0.472772	-2.86313
DIS3L2	-0.0908355	4.66824	-2.53279	0.0121051	0.472772	-2.86477
ITGB3	0.176136	5.53357	2.53225	0.012123	0.472772	-2.86592
FRG1BP	-0.0971965	5.36729	-2.53206	0.0121293	0.472772	-2.86632
SPRED2	0.0840204	3.9912	2.5316	0.0121447	0.472772	-2.86731
TGS1	-0.0877755	8.54939	-2.53047	0.0121829	0.472772	-2.86975
MFSD1	0.11733	10.301	2.5301	0.0121952	0.472772	-2.87054
FOXO3	0.0989366	10.052	2.53005	0.0121967	0.472772	-2.87063
ZNF473	-0.138552	4.96795	-2.52933	0.012221	0.472856	-2.87218
DEFA5	0.12452	3.26507	2.52855	0.0122476	0.473026	-2.87387
AZU1	0.191482	5.21594	2.52642	0.0123196	0.473653	-2.87843
RABL3	-0.115871	5.90508	-2.52633	0.0123226	0.473653	-2.87862
FAM200A	-0.133669	3.49613	-2.5251	0.0123644	0.473653	-2.88125
HSP90AB1	-0.153635	9.93016	-2.5248	0.0123746	0.473653	-2.88189
TRPM4	0.126639	4.38618	2.52434	0.0123902	0.473653	-2.88287
SFTA3	-0.0857466	1.98676	-2.52415	0.0123969	0.473653	-2.88329
STAU1	0.081769	10.657	2.52322	0.0124286	0.474016	-2.88527
KRT33A	0.112743	5.15542	2.52252	0.0124524	0.47408	-2.88676
TEX51	0.123766	3.83157	2.52076	0.0125128	0.475533	-2.89053
GZMA	-0.290828	9.38292	-2.52011	0.0125351	0.475533	-2.89191
GP1BA	0.193591	6.26533	2.519	0.0125737	0.476071	-2.8943
UPB1	0.109317	4.76376	2.51827	0.0125987	0.476071	-2.89584
ZNF33B	-0.112239	5.17323	-2.51752	0.0126247	0.476071	-2.89745
NDUFA4	-0.162073	8.99526	-2.51713	0.0126385	0.476071	-2.89829
ECHDC3	0.257823	5.54464	2.51636	0.0126653	0.47624	-2.89994
ERGIC1	0.108488	7.90626	2.51394	0.0127494	0.478563	-2.90508
UNC93B1	0.0877004	5.74308	2.51174	0.0128267	0.480599	-2.90978
MAP6D1	0.0883994	4.87355	2.51078	0.0128604	0.480599	-2.91182
SLC10A1	-0.126198	3.2232	-2.51048	0.0128712	0.480599	-2.91247
AGPAT2	0.0966316	7.14537	2.50893	0.0129258	0.481796	-2.91576
ACTR6	-0.153554	5.01602	-2.50713	0.0129898	0.483338	-2.91959
ITFG2	-0.0892465	6.61654	-2.50377	0.0131099	0.486959	-2.92674
CENPJ	-0.139367	5.61551	-2.501	0.0132094	0.489802	-2.93261
ZMYND11	-0.0991588	6.44299	-2.49982	0.0132522	0.49054	-2.93512
LRRC37A8P	-0.21214	5.81425	-2.49887	0.0132867	0.490963	-2.93713
PIAS4	0.08947	6.30665	2.4981	0.0133146	0.491146	-2.93876
FBXL19	0.100737	5.8694	2.49679	0.0133622	0.491722	-2.94154
MBOAT2	0.167515	8.32615	2.49503	0.0134267	0.491722	-2.94527
IDNK	-0.108097	7.85317	-2.49486	0.0134329	0.491722	-2.94562
SND1-IT1	-0.159766	6.20987	-2.49249	0.01352	0.491722	-2.95064
KDM4C	-0.100591	5.66599	-2.49168	0.0135498	0.491722	-2.95235
BTNL2	0.106912	3.38299	2.49141	0.0135598	0.491722	-2.95292
MTRF1	-0.168313	5.56518	-2.49125	0.0135659	0.491722	-2.95327
GEN1	-0.210741	4.11492	-2.49071	0.0135856	0.491722	-2.95439
ANKRD46	-0.172523	6.90322	-2.49063	0.0135887	0.491722	-2.95457
DNASE1L3	-0.12604	4.20795	-2.48982	0.0136188	0.491722	-2.95629
OXER1	0.115739	6.46949	2.48937	0.0136354	0.491722	-2.95723
IL1R2	0.189867	9.33916	2.48917	0.0136427	0.491722	-2.95765
KAT14	-0.0846302	7.16203	-2.48764	0.0137	0.491722	-2.9609
NGDN	-0.118389	7.10497	-2.4857	0.0137725	0.491722	-2.96499
ZNF136	-0.11923	5.64208	-2.48564	0.0137747	0.491722	-2.96511
ZGRF1	-0.112967	4.43235	-2.48546	0.0137812	0.491722	-2.96548
MPHOSPH10	-0.121129	8.51994	-2.48442	0.0138203	0.491722	-2.96768
OTUD4	-0.0879904	5.82543	-2.48425	0.0138268	0.491722	-2.96804
NFIA	0.116274	5.74558	2.48394	0.0138385	0.491722	-2.9687
TESMIN	0.157918	6.6056	2.48371	0.0138472	0.491722	-2.96919
HECW2	0.195024	4.99015	2.48356	0.0138527	0.491722	-2.96949
NMT2	-0.16304	7.18211	-2.48344	0.0138571	0.491722	-2.96974
CCDC7	-0.117668	4.5944	-2.48337	0.0138598	0.491722	-2.96989
WARS2	-0.0973353	4.56933	-2.4824	0.0138963	0.491842	-2.97193
TRAV13-2	-0.241908	5.89713	-2.48197	0.013913	0.491842	-2.97286
INSR	0.0845055	6.47053	2.48054	0.0139669	0.491842	-2.97585
SMC5	-0.101777	5.85347	-2.48047	0.0139696	0.491842	-2.976
GRPR	-0.122763	3.11066	-2.48023	0.0139788	0.491842	-2.97652
APP	0.0655139	8.62021	2.47964	0.0140013	0.491842	-2.97776
KCNK3	0.0771503	3.89235	2.47745	0.0140847	0.493957	-2.98236
ANXA2R-OT1	-0.105215	6.77059	-2.47521	0.0141706	0.494596	-2.98708
PPP1R26	0.148011	6.82673	2.47461	0.0141937	0.494596	-2.98833
SLPI	0.319733	7.98729	2.47441	0.0142014	0.494596	-2.98876
PIGL	-0.0925977	5.66352	-2.4743	0.0142055	0.494596	-2.98898
DCAF4	-0.129278	5.8016	-2.47396	0.0142187	0.494596	-2.9897
MBNL2	-0.133763	5.9555	-2.47288	0.0142603	0.494866	-2.99196
TDRKH-AS1	-0.210568	6.73493	-2.47233	0.0142816	0.494866	-2.99312
AATK	0.152381	6.67358	2.4714	0.0143178	0.494866	-2.99508
BDH2	-0.153084	5.416	-2.47136	0.0143191	0.494866	-2.99515
RNASEK	0.0879978	11.7208	2.46933	0.0143982	0.494909	-2.99941
MLPH	0.127346	3.76243	2.46925	0.0144012	0.494909	-2.99958
MIAT	-0.168339	7.22861	-2.4691	0.0144073	0.494909	-2.9999
RWDD2B	-0.121381	6.6767	-2.46895	0.014413	0.494909	-3.00021
PWWP3A	-0.106208	7.72473	-2.46647	0.0145101	0.495216	-3.00541
POGK	-0.0997549	7.53535	-2.4664	0.0145128	0.495216	-3.00555
TREX2	0.114708	5.40456	2.46632	0.014516	0.495216	-3.00572
UICLM	-0.246578	5.79959	-2.46454	0.0145858	0.495216	-3.00944
MRPL13	-0.254415	4.91072	-2.464	0.0146074	0.495216	-3.01058
VSIG2	0.136644	5.8789	2.46258	0.0146634	0.495216	-3.01355
PTPN4	-0.202465	6.64011	-2.46193	0.0146892	0.495216	-3.0149
RPS27L	-0.188019	6.97854	-2.46152	0.0147057	0.495216	-3.01577
PXYLP1	0.114825	5.29634	2.46107	0.0147233	0.495216	-3.0167
ABLIM1	-0.121955	11.2695	-2.46056	0.0147439	0.495216	-3.01778
ACTRT3	0.0981153	2.32452	2.46055	0.0147442	0.495216	-3.0178
ZNF681	-0.101799	3.33825	-2.46009	0.0147624	0.495216	-3.01875
SET	-0.0719176	9.70673	-2.45948	0.0147867	0.495216	-3.02003
KCTD5	0.0754632	5.67813	2.45924	0.0147963	0.495216	-3.02053
FOXO3B	0.189597	6.43853	2.45869	0.0148184	0.495216	-3.02168
CLU	0.214733	6.96241	2.45806	0.0148435	0.495216	-3.02299
OSBPL3	-0.122916	7.70395	-2.45802	0.0148451	0.495216	-3.02307
PHACTR2	-0.123023	7.1889	-2.45744	0.0148682	0.495216	-3.02428
CNST	-0.132948	5.94062	-2.457	0.0148861	0.495216	-3.02521
MGA	-0.106932	6.08734	-2.45661	0.0149019	0.495216	-3.02603
AGK	-0.0950599	5.56517	-2.45595	0.0149282	0.495216	-3.02739
F13A1	0.202227	9.54213	2.45521	0.0149582	0.495216	-3.02895
GUF1	-0.149474	5.51256	-2.45489	0.0149708	0.495216	-3.0296
PGD	0.0920678	5.85138	2.45471	0.0149784	0.495216	-3.02999
KLRK1	-0.238403	9.11765	-2.45374	0.0150173	0.495734	-3.032
TMEM127	0.0875877	9.50321	2.45093	0.0151315	0.497978	-3.03785
FUT7	0.109631	5.35807	2.45058	0.0151459	0.497978	-3.03859
TGIF1	-0.0796344	5.95614	-2.45003	0.0151684	0.497978	-3.03974
CRNN	0.0955828	2.9232	2.44978	0.0151786	0.497978	-3.04026
PPP2R5C	-0.0667105	8.39783	-2.44695	0.0152946	0.499903	-3.04614
CD3D	-0.182762	10.2183	-2.44593	0.0153367	0.499903	-3.04827
ATP8B4	0.25267	5.60881	2.44483	0.0153819	0.499903	-3.05054
GARS1	-0.101847	9.75189	-2.44456	0.0153931	0.499903	-3.0511
SUOX	0.124142	6.31223	2.44452	0.0153948	0.499903	-3.05119
CBX4	0.125278	5.69893	2.44424	0.0154062	0.499903	-3.05176
TTC7B	0.223656	7.02671	2.44417	0.0154091	0.499903	-3.05191
GPR22	-0.130015	3.67157	-2.4438	0.0154245	0.499903	-3.05268
EIF2B3	-0.135371	6.7674	-2.44133	0.0155272	0.502009	-3.05781
LDLRAD4-AS1	-0.186848	4.56295	-2.44053	0.0155605	0.502009	-3.05947
EXOSC1	-0.065582	6.51638	-2.43999	0.0155831	0.502009	-3.06059
DAAM1	-0.114179	6.40603	-2.43998	0.0155835	0.502009	-3.0606
PPP4R1	0.146718	9.43483	2.43893	0.0156275	0.502631	-3.06278
BMS1P2	-0.256236	6.17685	-2.4384	0.0156499	0.502631	-3.06389
NUFIP1	-0.110849	5.27395	-2.43692	0.0157122	0.503875	-3.06696
FNDC7	0.108788	4.71891	2.43587	0.0157563	0.504367	-3.06912
BBS4	-0.123086	7.01954	-2.43536	0.0157781	0.504367	-3.07019
ZNRF1	0.0871672	5.5345	2.43465	0.0158079	0.504367	-3.07165
FOXP1	-0.0886726	8.76273	-2.43416	0.0158286	0.504367	-3.07266
SLC7A6	-0.0985919	8.09202	-2.43331	0.0158647	0.504367	-3.07442
SETD6	-0.123171	6.61228	-2.43321	0.0158692	0.504367	-3.07464
MYO5B	-0.0799976	3.17323	-2.43236	0.0159052	0.504542	-3.07638
DPH5	-0.11795	7.86582	-2.43197	0.015922	0.504542	-3.0772
GDPD1	-0.0876249	3.48179	-2.43036	0.0159907	0.50524	-3.08053
SLC8A1	0.12728	5.31687	2.43034	0.0159913	0.50524	-3.08056
PIK3R1	-0.113921	8.1945	-2.42863	0.0160647	0.506143	-3.08409
SNX21	0.10647	5.71846	2.4279	0.0160962	0.506143	-3.0856
CCNQ	-0.093907	7.70211	-2.42768	0.0161059	0.506143	-3.08607
MBOAT1	0.119039	9.76346	2.42746	0.0161151	0.506143	-3.08651
CR1	0.138711	7.44301	2.42659	0.0161526	0.506143	-3.0883
LOXHD1	0.104879	4.85155	2.42594	0.016181	0.506143	-3.08966
CCT8	-0.0824501	7.10954	-2.42539	0.0162046	0.506143	-3.09078
FAM118A	-0.32366	7.7203	-2.42494	0.0162242	0.506143	-3.09172
SLC24A3	0.233353	5.26994	2.4241	0.0162604	0.506143	-3.09344
EPO	0.0823588	4.60104	2.42386	0.0162707	0.506143	-3.09393
INHBA	0.142246	3.51782	2.42364	0.0162806	0.506143	-3.09439
TPRG1	-0.204068	4.30212	-2.4224	0.0163347	0.507088	-3.09695
WSB1	0.132137	7.62256	2.42157	0.0163707	0.507467	-3.09865
MORF4L2-AS1	-0.122263	4.11173	-2.42042	0.0164212	0.507736	-3.10103
TBX21	-0.176959	8.79692	-2.42029	0.0164269	0.507736	-3.10129
S1PR3	0.140313	4.72642	2.41894	0.0164858	0.508202	-3.10406
ZNF260	-0.15371	7.98571	-2.41837	0.016511	0.508202	-3.10523
MFN2	0.0889345	5.86173	2.41784	0.0165343	0.508202	-3.10632
ABCA13	0.175647	2.29093	2.41735	0.0165562	0.508202	-3.10734
SUPT16H	-0.100161	8.4741	-2.41724	0.0165609	0.508202	-3.10756
SMARCC1	-0.0613789	8.14309	-2.41553	0.0166364	0.508518	-3.11107
TRAV13-1	-0.214565	6.87493	-2.41541	0.016642	0.508518	-3.11133
SAP30	0.0801755	5.08182	2.41539	0.0166427	0.508518	-3.11136
DDX50	-0.0882626	6.47973	-2.41465	0.0166757	0.508799	-3.11289
CNTNAP3	0.259105	5.26971	2.41401	0.0167041	0.508939	-3.1142
MIR3681HG	0.0739305	3.07466	2.41332	0.0167346	0.509141	-3.1156
LOC389834	-0.263418	5.30055	-2.41269	0.0167629	0.509278	-3.11691
TRIOBP	0.0867202	7.25548	2.41196	0.0167953	0.509538	-3.1184
IL17RA	0.115154	9.16645	2.40987	0.016889	0.510977	-3.12269
COPA	0.0908143	5.25584	2.40922	0.0169183	0.510977	-3.12402
RNF32-DT	0.0890529	4.34402	2.40893	0.0169313	0.510977	-3.12461
EARS2	-0.0964755	4.55678	-2.4086	0.0169461	0.510977	-3.12529
PDCD6-AHRR	0.148547	3.95691	2.40717	0.0170108	0.510977	-3.12822
TIMMDC1	-0.096052	8.72152	-2.40628	0.0170511	0.510977	-3.13005
ZNHIT3	-0.173769	7.30085	-2.40584	0.0170708	0.510977	-3.13094
DMRTB1	0.0837037	3.16918	2.4056	0.0170817	0.510977	-3.13143
C3AR1	0.211448	8.81432	2.40542	0.0170899	0.510977	-3.1318
ETS1	-0.112076	9.5859	-2.40534	0.0170935	0.510977	-3.13196
MORF4L2	-0.183788	6.5377	-2.40455	0.0171296	0.510977	-3.13359
MAP3K14-AS1	-0.115136	3.62718	-2.40302	0.0171992	0.510977	-3.13671
RAB27A	0.102246	9.49385	2.40152	0.0172677	0.510977	-3.13977
PARM1	-0.130085	4.62619	-2.40141	0.0172729	0.510977	-3.14
ASGR2	0.232918	7.34493	2.40134	0.0172758	0.510977	-3.14013
ERLIN1	0.0862441	6.13606	2.40092	0.0172954	0.510977	-3.141
RNASE3	0.385984	5.7418	2.40088	0.0172971	0.510977	-3.14108
ASTE1	-0.0902071	7.25948	-2.40084	0.0172991	0.510977	-3.14117
LINC00536	0.11095	2.99896	2.40039	0.0173197	0.510977	-3.14209
MXD3	0.111276	6.64108	2.3992	0.0173745	0.510977	-3.14452
NDST3	0.0921047	2.75739	2.39826	0.0174176	0.510977	-3.14643
GOLGA8A	-0.121754	7.61706	-2.39797	0.0174312	0.510977	-3.14703
OXNAD1	-0.143591	8.20877	-2.39642	0.0175028	0.510977	-3.15019
ATP8B3	0.0689574	5.66151	2.39568	0.0175372	0.510977	-3.1517
RPL36A	-0.139549	8.46875	-2.39536	0.017552	0.510977	-3.15235
ERVH-6	0.0817905	3.99602	2.39534	0.0175528	0.510977	-3.15238
TRGV7	-0.133751	5.64098	-2.39528	0.0175556	0.510977	-3.1525
METTL5	-0.111269	7.31926	-2.39526	0.0175566	0.510977	-3.15255
CCDC80	0.0694271	3.4746	2.39525	0.0175568	0.510977	-3.15256
SNHG8	-0.125499	6.89627	-2.39518	0.0175605	0.510977	-3.15272
HIP1	0.190429	6.11174	2.39398	0.017616	0.511601	-3.15515
ZSCAN32	-0.0903666	6.69853	-2.3923	0.0176948	0.511601	-3.15858
SEMA4A	0.166312	7.56607	2.39223	0.0176981	0.511601	-3.15873
ZNF532	-0.192891	5.0156	-2.39222	0.0176982	0.511601	-3.15873
PTPRK-AS1	-0.109239	2.33053	-2.39215	0.0177017	0.511601	-3.15888
ZKSCAN1	-0.0943047	7.85615	-2.39046	0.0177809	0.513196	-3.16232
LINC00482	0.114935	5.56304	2.38902	0.0178486	0.514453	-3.16524
AK3	-0.153575	6.89292	-2.38776	0.0179081	0.515474	-3.16781
LOC105374629	0.103112	3.17702	2.38613	0.0179853	0.516571	-3.17111
GBE1	0.143916	8.7516	2.38594	0.0179946	0.516571	-3.17151
LRRC37A7P	0.0645132	2.16895	2.38399	0.0180874	0.518537	-3.17547
LRRC36	-0.135717	4.73136	-2.38308	0.0181306	0.518594	-3.1773
UTRN	-0.0856446	6.95677	-2.38293	0.0181379	0.518594	-3.17761
LBH	-0.0904777	10.9234	-2.38204	0.0181806	0.518899	-3.17942
ZNF571	-0.201692	3.06513	-2.38169	0.0181972	0.518899	-3.18012
HLA-DQA1	-0.40366	7.5964	-2.38113	0.0182241	0.518973	-3.18126
LSG1	-0.109212	7.72748	-2.37989	0.018284	0.519985	-3.18378
AP1S1	0.0896586	5.2984	2.37776	0.0183868	0.522215	-3.18809
IFI27	0.384096	5.7082	2.37305	0.0186163	0.522811	-3.19762
DDX27	-0.122817	8.29393	-2.37222	0.0186567	0.522811	-3.19929
RPL13A	-0.0878459	12.3676	-2.37218	0.0186587	0.522811	-3.19937
ABRAXAS1	-0.152333	5.95525	-2.37136	0.018699	0.522811	-3.20103
SNHG12	-0.104477	8.43964	-2.3712	0.0187066	0.522811	-3.20134
RPS2	-0.0735123	11.1807	-2.37081	0.0187261	0.522811	-3.20215
RBMX2	-0.0931802	7.70232	-2.37059	0.0187371	0.522811	-3.20259
IL1R1	0.180534	5.99506	2.37038	0.018747	0.522811	-3.203
H2AB3	0.0972843	4.917	2.36929	0.0188011	0.522811	-3.20521
KCNH1	0.0988817	3.87066	2.3692	0.0188052	0.522811	-3.20538
C14orf28	-0.165755	5.47689	-2.36817	0.0188564	0.522811	-3.20747
DAPL1	0.102439	4.10624	2.36808	0.0188607	0.522811	-3.20765
AZIN2	0.0856242	4.12022	2.36783	0.0188731	0.522811	-3.20815
SMG6	-0.0806991	4.40943	-2.36771	0.018879	0.522811	-3.20839
ZNF567	-0.112528	3.65953	-2.36765	0.0188822	0.522811	-3.20852
ELOVL3	0.105168	3.01164	2.36706	0.0189112	0.522811	-3.2097
NT5DC4	0.098821	3.70034	2.36666	0.0189311	0.522811	-3.21051
FNDC8	0.0922734	2.97362	2.36639	0.0189447	0.522811	-3.21106
MRFAP1L2	-0.101952	10.1191	-2.36593	0.0189673	0.522811	-3.21198
PRKACA	0.0971391	6.84857	2.36579	0.0189745	0.522811	-3.21227
RNF115	-0.0769014	8.17827	-2.36442	0.0190428	0.522811	-3.21503
PLPP3	0.0814024	2.95965	2.36406	0.0190609	0.522811	-3.21575
GPER1	0.0893011	4.67181	2.36392	0.0190679	0.522811	-3.21604
HPSE	0.185251	7.93569	2.36375	0.019076	0.522811	-3.21636
ZFAND3	0.108389	7.26679	2.36344	0.0190916	0.522811	-3.21699
TRAF3IP3	-0.105967	8.59495	-2.36243	0.0191422	0.522811	-3.21902
SRRM1	-0.0796538	9.47733	-2.36229	0.0191493	0.522811	-3.21931
CACYBP	-0.0900209	7.8911	-2.36187	0.0191707	0.522811	-3.22016
CELF2-AS1	-0.159148	4.24864	-2.36167	0.0191806	0.522811	-3.22056
PES1	0.0825124	4.84684	2.36154	0.019187	0.522811	-3.22082
GUCY2D	0.129147	5.09894	2.36149	0.0191897	0.522811	-3.22092
CBS	0.163005	5.07403	2.3611	0.0192093	0.522811	-3.22171
F5	0.210333	8.02734	2.36077	0.0192257	0.522811	-3.22236
LOC283788	-0.183337	5.20978	-2.36018	0.0192553	0.522811	-3.22355
SLC38A3	0.12522	3.98485	2.3596	0.0192847	0.522811	-3.22471
ATP7B	0.174813	4.7602	2.35912	0.0193091	0.522811	-3.22569
TSPAN1	0.0986344	4.5829	2.35902	0.0193139	0.522811	-3.22588
RBM34	-0.0956365	6.63253	-2.35816	0.0193577	0.522811	-3.22762
NTSR1	0.111944	3.53236	2.3576	0.0193862	0.522811	-3.22874
MRPS28	-0.194489	5.36155	-2.35724	0.0194044	0.522811	-3.22946
FCER1G	0.0664377	12.0514	2.35649	0.0194421	0.522811	-3.23095
DISC1	0.0861704	5.35276	2.35567	0.019484	0.522811	-3.23261
IRGM	-0.17726	4.19344	-2.3553	0.0195028	0.522811	-3.23335
NUAK1	-0.287314	5.29102	-2.35515	0.0195108	0.522811	-3.23366
ST3GAL5	-0.0869304	6.64399	-2.35482	0.0195276	0.522811	-3.23432
ARNT2	0.112828	4.07626	2.35424	0.0195569	0.522811	-3.23547
SERTAD2	-0.0798196	9.57328	-2.35422	0.0195583	0.522811	-3.23553
TRDV2	-0.151956	9.36116	-2.35167	0.0196887	0.525639	-3.24062
SHISAL2A	-0.120803	6.50631	-2.35051	0.0197483	0.526156	-3.24294
SLC41A2	-0.105258	3.39156	-2.35034	0.0197573	0.526156	-3.24329
INAVA	0.118791	3.24037	2.34894	0.0198294	0.526241	-3.24608
ZNF697	0.126432	5.13011	2.34882	0.0198359	0.526241	-3.24634
NASP	-0.0965075	7.77078	-2.34803	0.0198768	0.526241	-3.24792
RPL18A	-0.104154	11.8702	-2.3478	0.0198888	0.526241	-3.24838
GPR27	0.122007	6.4447	2.34696	0.0199322	0.526241	-3.25005
TNRC18	0.0581552	5.59975	2.34654	0.019954	0.526241	-3.25089
IBA57-DT	-0.140837	3.806	-2.34648	0.0199571	0.526241	-3.25101
PFKFB4	0.142119	7.02464	2.34647	0.0199577	0.526241	-3.25103
CCDC170	0.117193	3.88277	2.34549	0.0200086	0.52659	-3.25298
CRTAC1	0.109476	3.74211	2.34527	0.0200202	0.52659	-3.25343
NPW	0.167853	4.42694	2.34421	0.020076	0.526704	-3.25556
TEX56P	-0.112973	4.15266	-2.34401	0.0200862	0.526704	-3.25595
HOXA7	-0.0805072	5.27575	-2.34247	0.0201668	0.526704	-3.25902
GPATCH11	-0.140167	5.89083	-2.34222	0.0201801	0.526704	-3.25952
HSD17B11	0.0860525	11.2852	2.34212	0.0201853	0.526704	-3.25972
SERPING1	0.343521	7.24717	2.342	0.0201918	0.526704	-3.25997
FAM200B	0.136968	7.15002	2.3419	0.0201971	0.526704	-3.26017
SLC7A5	0.186212	8.06704	2.33966	0.0203152	0.528082	-3.26464
LINC00622	0.26027	4.73019	2.33957	0.0203197	0.528082	-3.26481
STAT2	0.0692572	7.34107	2.33905	0.0203471	0.528082	-3.26584
LNCEGFL7OS	0.0939548	3.5855	2.33902	0.0203489	0.528082	-3.26591
DNAJC7	-0.074509	8.53488	-2.33852	0.0203755	0.52813	-3.26691
LNCATV	0.166277	6.44742	2.33737	0.0204366	0.528966	-3.2692
ZNF589	-0.101523	6.41449	-2.33647	0.0204844	0.528966	-3.27099
USP28	-0.0978569	7.27299	-2.33645	0.0204853	0.528966	-3.27103
PTPRF	0.0959002	4.10595	2.33605	0.0205068	0.528966	-3.27183
DOCK10	-0.120168	8.85808	-2.3351	0.0205575	0.529634	-3.27372
CEP126	-0.121378	4.48802	-2.33368	0.0206331	0.530719	-3.27653
ANGPTL1	-0.0998951	4.29664	-2.33338	0.0206493	0.530719	-3.27713
ZSCAN16-AS1	-0.0909718	5.16258	-2.33137	0.0207574	0.532019	-3.28113
SUCNR1	0.221139	4.57067	2.32995	0.0208338	0.532019	-3.28395
TTF1	-0.0937971	6.96704	-2.32976	0.0208444	0.532019	-3.28433
QSOX1	0.0922065	5.83725	2.32941	0.0208633	0.532019	-3.28503
SBF2	0.128134	7.50546	2.32938	0.0208646	0.532019	-3.28508
SINHCAF	-0.109548	7.80798	-2.32898	0.0208865	0.532019	-3.28588
SLAMF7	-0.213261	7.33117	-2.32785	0.0209478	0.532019	-3.28812
GNRH1	-0.111004	5.71077	-2.32718	0.0209842	0.532019	-3.28945
MTRF1L	-0.0538156	5.70546	-2.32612	0.0210419	0.532019	-3.29155
GAS7	0.132197	7.89577	2.32551	0.0210753	0.532019	-3.29277
SOS1	-0.0853693	6.62821	-2.32532	0.0210852	0.532019	-3.29313
OTULINL	0.111244	6.49073	2.32461	0.0211245	0.532019	-3.29455
ARPP19	-0.0883148	7.0803	-2.3245	0.0211305	0.532019	-3.29477
ASAP1	0.0879501	9.20891	2.32449	0.0211311	0.532019	-3.29479
DGCR2	0.086385	7.71856	2.32397	0.0211595	0.532019	-3.29582
SPHK1	0.153184	3.78352	2.32378	0.0211699	0.532019	-3.29619
LOC441081	0.106239	10.1763	2.32362	0.0211787	0.532019	-3.29651
NFATC2	-0.0568734	6.56093	-2.32337	0.0211922	0.532019	-3.297
SPTBN1	-0.0672625	5.69015	-2.32332	0.0211952	0.532019	-3.29711
TFPI	0.100904	3.22286	2.32326	0.0211981	0.532019	-3.29721
PLIN3	0.148627	7.61921	2.32233	0.0212495	0.532247	-3.29907
LINC00641	-0.125316	2.99773	-2.32219	0.021257	0.532247	-3.29934
IL13RA1	0.15412	8.56524	2.32126	0.0213085	0.53239	-3.30119
APOBEC2	-0.115459	6.1211	-2.32016	0.0213687	0.53239	-3.30334
VIM	0.129281	8.92459	2.32013	0.0213705	0.53239	-3.30341
NPBWR2	0.0981713	2.37411	2.31982	0.0213875	0.53239	-3.30402
OSBPL1A	0.111059	5.58091	2.3197	0.0213941	0.53239	-3.30426
NXPH4	0.105519	4.13864	2.31881	0.0214436	0.53239	-3.30602
RANBP3	0.0602565	6.57657	2.31791	0.0214938	0.53239	-3.30781
CCDC50	-0.171554	6.00127	-2.3176	0.0215107	0.53239	-3.30841
NSUN7	0.141579	4.84758	2.31716	0.0215353	0.53239	-3.30929
NCBP3	0.0722615	7.65197	2.31707	0.0215403	0.53239	-3.30946
PDE4DIPP2	-0.10853	5.06631	-2.31697	0.0215458	0.53239	-3.30966
PTK2B	0.0886155	8.07631	2.31627	0.021585	0.53239	-3.31105
HCG27	0.151666	9.23011	2.31583	0.0216093	0.53239	-3.31191
SGCE	-0.16899	4.6239	-2.31579	0.0216117	0.53239	-3.31199
PZP	-0.160335	4.77161	-2.31485	0.021664	0.532463	-3.31384
GLRX3	-0.0692093	6.25613	-2.31476	0.0216695	0.532463	-3.31403
SUPT3H	-0.133815	5.84467	-2.31393	0.0217154	0.532463	-3.31565
PCDHGA9	0.118863	3.14014	2.31382	0.0217216	0.532463	-3.31587
TIMM8B	-0.0899679	6.42494	-2.31351	0.0217393	0.532463	-3.31649
EPC1	-0.0549437	7.85619	-2.3125	0.0217961	0.533242	-3.31849
DYNC2H1	-0.0778113	3.218	-2.31085	0.0218888	0.534715	-3.32173
TOR4A	0.088302	8.54505	2.31011	0.0219307	0.534715	-3.32319
KIF21A	-0.200523	5.90097	-2.30972	0.0219529	0.534715	-3.32397
ANO7	0.106591	3.594	2.30876	0.0220071	0.534715	-3.32585
TMT1B	0.143139	2.41972	2.3082	0.0220391	0.534715	-3.32696
SMARCD3	0.112285	6.31511	2.30806	0.0220469	0.534715	-3.32723
PDE4DIP	-0.0951791	6.32827	-2.30687	0.0221148	0.534715	-3.32958
H4C3	-0.217585	5.88283	-2.3068	0.0221184	0.534715	-3.32971
CALD1	0.0879883	3.99977	2.30639	0.022142	0.534715	-3.33052
MLLT1	0.0971526	6.12767	2.30631	0.0221466	0.534715	-3.33068
MROH1	-0.0833983	5.57106	-2.30627	0.0221488	0.534715	-3.33076
HOXA11-AS	0.0966909	4.06805	2.30613	0.0221567	0.534715	-3.33103
INAFM2	0.0919363	8.76509	2.30555	0.0221897	0.534908	-3.33217
LINC00173	0.16867	7.60208	2.30232	0.0223748	0.538458	-3.33851
ZNF687	0.133738	6.60525	2.30184	0.0224024	0.538458	-3.33945
RELL1	0.0841908	7.26104	2.30124	0.0224372	0.538458	-3.34064
LAMC1	0.114712	4.76627	2.30087	0.0224582	0.538458	-3.34135
VSIG1	-0.202947	4.77476	-2.30079	0.0224631	0.538458	-3.34152
SPCS1	-0.0531934	11.2355	-2.29939	0.0225443	0.539712	-3.34427
SGPP2	-0.0937151	3.7243	-2.29901	0.0225659	0.539712	-3.34501
FIP1L1	-0.0875533	7.51544	-2.29819	0.0226136	0.539778	-3.34662
TSHB	0.155785	4.51466	2.29809	0.0226192	0.539778	-3.34681
MORC4	-0.173393	6.64473	-2.29646	0.0227144	0.541445	-3.35001
ZNF14	-0.19495	7.52363	-2.29602	0.0227401	0.541454	-3.35088
ZBTB24	-0.0876754	5.79382	-2.29456	0.0228253	0.542124	-3.35373
P2RY8	-0.0586235	12.0415	-2.29452	0.0228274	0.542124	-3.3538
CCDC66	-0.10664	4.96561	-2.29323	0.0229032	0.542124	-3.35633
POU3F3	0.0717241	2.82859	2.29291	0.0229223	0.542124	-3.35697
MPP1	0.181158	10.574	2.29282	0.0229272	0.542124	-3.35713
FOLH1	0.067376	3.60651	2.29207	0.0229714	0.542124	-3.3586
ZNF540	-0.107324	4.99527	-2.29206	0.0229722	0.542124	-3.35862
CXCL16	0.129453	10.7228	2.29172	0.0229919	0.542124	-3.35928
SOX6	0.149878	3.86665	2.29139	0.0230114	0.542124	-3.35993
RASGEF1B	-0.193298	3.91908	-2.29121	0.0230221	0.542124	-3.36028
SLC7A5P1	-0.11216	8.18447	-2.2904	0.0230697	0.542646	-3.36186
PRKAG2	-0.0701744	6.55062	-2.28908	0.0231479	0.543887	-3.36444
INPP5A	0.112367	6.3491	2.28737	0.0232495	0.54549	-3.36778
LAD1	0.0788116	4.56595	2.2869	0.0232777	0.54549	-3.3687
RAB30	-0.151355	5.47065	-2.2864	0.0233076	0.54549	-3.36968
LRFN1	0.168201	7.39437	2.28566	0.0233514	0.54549	-3.37111
PTPRE	0.0737408	6.74027	2.28438	0.023428	0.54549	-3.37361
PXK	0.0946789	6.75168	2.28254	0.0235389	0.54549	-3.37721
GDF11	-0.0652719	5.41214	-2.28093	0.0236354	0.54549	-3.38033
ST20	0.132686	9.65699	2.28084	0.0236413	0.54549	-3.38052
MCCC2	-0.0602338	5.13426	-2.28071	0.0236489	0.54549	-3.38077
EMP1	-0.0783519	3.52888	-2.28054	0.023659	0.54549	-3.38109
ABTB3	-0.171462	6.56634	-2.2805	0.0236615	0.54549	-3.38117
NPY6R	0.0682905	2.30867	2.28029	0.0236742	0.54549	-3.38158
PPIA	-0.0535817	10.0364	-2.27992	0.0236963	0.54549	-3.38229
LINC01278	-0.0901565	5.72418	-2.27955	0.0237189	0.54549	-3.38302
ZFP90	-0.121389	6.7763	-2.27944	0.0237259	0.54549	-3.38325
CEP78	-0.179184	6.35721	-2.27907	0.023748	0.54549	-3.38395
TP53BP2	0.131273	7.13768	2.27907	0.0237482	0.54549	-3.38396
PTGS1	0.158892	7.76507	2.27854	0.0237805	0.54549	-3.38499
MPHOSPH9	-0.150349	6.65882	-2.27845	0.0237858	0.54549	-3.38516
B3GNT7	-0.0872588	4.98399	-2.27826	0.0237971	0.54549	-3.38553
BRIX1	-0.129932	7.26679	-2.27799	0.0238134	0.54549	-3.38605
GTF3A	-0.109956	8.95301	-2.27753	0.0238418	0.54549	-3.38696
AQP1	0.161099	4.56382	2.27752	0.0238421	0.54549	-3.38697
PARGP1	-0.13323	7.50989	-2.27728	0.0238566	0.54549	-3.38743
KIAA1143	-0.0829239	7.88588	-2.2772	0.0238614	0.54549	-3.38758
PGBD4	-0.150426	5.42821	-2.2769	0.0238802	0.54549	-3.38818
SLC7A4	0.0866758	3.13448	2.27641	0.0239098	0.545584	-3.38913
DGKE	-0.0791143	5.21229	-2.27528	0.0239791	0.54658	-3.39133
PADI4	0.159185	6.19701	2.2742	0.0240452	0.547208	-3.39343
METTL21C	-0.111491	2.35821	-2.27399	0.0240579	0.547208	-3.39383
CLNS1A	-0.0983438	8.33012	-2.2727	0.0241368	0.548419	-3.39633
MCEMP1	0.22357	7.78036	2.27227	0.0241635	0.548442	-3.39717
SAMD3	-0.148662	7.58745	-2.27177	0.0241942	0.548479	-3.39814
CARF	-0.157724	3.79615	-2.27097	0.0242437	0.548479	-3.39969
AQP6	0.0860728	4.34138	2.27009	0.0242981	0.548479	-3.4014
PLPBP	-0.0912995	6.25718	-2.27008	0.0242984	0.548479	-3.40141
IQSEC2	0.0809308	4.90192	2.26987	0.0243114	0.548479	-3.40181
HAGLROS	0.0944051	3.79665	2.26974	0.0243192	0.548479	-3.40206
KPNA3	-0.14412	7.97636	-2.26854	0.0243941	0.549109	-3.4044
PSMA6	-0.129308	9.02539	-2.26846	0.0243986	0.549109	-3.40454
EML5	-0.10301	3.35917	-2.26699	0.0244901	0.550467	-3.40739
WDR48	-0.0422603	7.59671	-2.26656	0.0245171	0.550467	-3.40823
LOXL2	0.0647265	4.91707	2.26625	0.0245362	0.550467	-3.40882
TCF7	-0.134092	9.12311	-2.26557	0.0245788	0.550662	-3.41014
CFAP298	-0.0669115	5.5161	-2.2649	0.0246208	0.550662	-3.41144
CFAP107	0.106787	3.64706	2.2647	0.0246329	0.550662	-3.41182
ARIH2OS	-0.146799	4.03876	-2.26446	0.0246481	0.550662	-3.41228
EPM2AIP1	-0.0855605	9.56285	-2.26335	0.0247178	0.551025	-3.41444
RNF157-AS1	-0.174245	4.48719	-2.26269	0.024759	0.551025	-3.4157
IKBKG	0.0853805	7.36097	2.26257	0.0247666	0.551025	-3.41594
CACNG8	0.0754939	5.16291	2.26212	0.0247948	0.551025	-3.4168
IFT57	-0.104587	5.18657	-2.26206	0.0247987	0.551025	-3.41692
TGFA	0.124567	4.98115	2.26141	0.0248396	0.551025	-3.41818
IER5L	0.0865563	4.93702	2.26133	0.0248449	0.551025	-3.41834
PIK3R2	0.113236	6.689	2.26091	0.0248716	0.551046	-3.41916
ZBTB47	0.0937452	6.19568	2.25922	0.0249782	0.552348	-3.42241
ZNF783	-0.0961878	8.57335	-2.25891	0.0249978	0.552348	-3.42301
RPS7	-0.208635	9.8363	-2.25857	0.0250192	0.552348	-3.42365
LYRM7	-0.125448	7.56195	-2.25778	0.0250693	0.552348	-3.42518
GAB2	0.153742	9.26351	2.25744	0.0250915	0.552348	-3.42585
SLC9A8	0.109724	8.51986	2.25738	0.0250952	0.552348	-3.42596
PTCRA	0.095174	6.29169	2.25712	0.0251114	0.552348	-3.42645
TMEM267	-0.16767	5.03377	-2.25636	0.0251597	0.55284	-3.42791
UPF1	0.0778882	8.01174	2.25431	0.0252908	0.554941	-3.43187
RTN4	0.0629972	9.9245	2.2535	0.0253429	0.554941	-3.43343
NHLH1	0.173485	5.85538	2.25332	0.0253542	0.554941	-3.43377
SEC24B-AS1	-0.197515	4.86186	-2.25324	0.0253592	0.554941	-3.43392
EDRF1-DT	-0.0885193	3.7507	-2.25177	0.0254541	0.556447	-3.43676
POU1F1	0.104666	2.6209	2.25082	0.0255153	0.556928	-3.43859
STXBP4	-0.0771749	2.71086	-2.25059	0.0255303	0.556928	-3.43903
RABGAP1L	-0.0664036	7.11019	-2.25021	0.0255549	0.556928	-3.43976
METTL9	0.0973347	8.9423	2.24981	0.0255804	0.556928	-3.44052
ABCD1	0.139578	5.94216	2.24904	0.0256307	0.557026	-3.44201
EXOSC4	0.0718245	5.93637	2.24894	0.0256371	0.557026	-3.44221
HSPBAP1	0.117439	8.94377	2.24843	0.0256699	0.557173	-3.44318
FOXQ1	0.204077	3.81743	2.24784	0.0257083	0.557439	-3.44431
S100P	0.394581	10.6826	2.24701	0.0257624	0.557782	-3.44591
NR1D2	-0.145556	7.75822	-2.24679	0.0257763	0.557782	-3.44632
GPR78	0.095289	5.05526	2.24471	0.0259123	0.558066	-3.45032
ACTC1	0.0800272	3.62193	2.24449	0.0259265	0.558066	-3.45073
ZNF503	0.0843934	5.08768	2.24447	0.0259282	0.558066	-3.45078
MRPL20	-0.0727963	8.2772	-2.24438	0.0259338	0.558066	-3.45095
FAIM2	0.0841586	4.12347	2.24385	0.0259684	0.558066	-3.45196
F2RL1	0.170265	4.74844	2.24305	0.0260208	0.558066	-3.45349
MYL12A	-0.0800739	8.53622	-2.24249	0.026058	0.558066	-3.45458
SEC14L4	0.107866	4.22339	2.24189	0.0260971	0.558066	-3.45572
RPL3L	0.115184	3.59041	2.24185	0.0260996	0.558066	-3.45579
BMP2	0.0900054	3.1196	2.24185	0.0261	0.558066	-3.4558
OSCAR	0.272859	8.94859	2.24167	0.026112	0.558066	-3.45615
EFNA3	0.100441	5.21564	2.24135	0.0261327	0.558066	-3.45675
LINC00954	-0.160852	7.30042	-2.24131	0.0261353	0.558066	-3.45683
EEF1B2	-0.150013	11.0887	-2.24101	0.0261553	0.558066	-3.45741
DUSP3	0.0956918	6.31541	2.24015	0.0262116	0.558343	-3.45904
MROH6	0.135212	5.82587	2.24002	0.0262205	0.558343	-3.4593
EIF1B	0.0957963	7.00002	2.23958	0.0262498	0.558411	-3.46015
SHOX2	0.0855244	3.17282	2.23846	0.026324	0.558723	-3.46229
NAP1L4	-0.0993187	6.56532	-2.238	0.0263545	0.558723	-3.46317
SLC35A2	0.0830419	6.46178	2.23783	0.0263656	0.558723	-3.46349
OR2B3	0.136255	3.48504	2.23778	0.0263692	0.558723	-3.46359
PRKCQ-AS1	-0.157621	7.40067	-2.23711	0.0264137	0.558754	-3.46487
THOC3	-0.119089	7.31421	-2.23697	0.026423	0.558754	-3.46514
HLA-DPB2	-0.194687	2.93441	-2.23478	0.0265691	0.559485	-3.46933
EIF5A2	-0.162861	4.72566	-2.23469	0.0265751	0.559485	-3.4695
LOC101926948	0.108567	4.13519	2.23448	0.0265891	0.559485	-3.4699
SEMA6B	0.127283	5.5396	2.23392	0.0266262	0.559485	-3.47096
PHC1	-0.0905204	9.40752	-2.2338	0.0266346	0.559485	-3.47119
SIAH2	0.203422	8.2797	2.23318	0.0266763	0.559485	-3.47238
TBP	-0.0897923	9.2339	-2.23301	0.0266872	0.559485	-3.47269
RPS23	-0.12454	8.99272	-2.23243	0.026726	0.559485	-3.47379
DOCK4	0.173243	5.3304	2.23225	0.0267383	0.559485	-3.47414
DUX4L8	0.0900746	5.74046	2.23202	0.0267541	0.559485	-3.47459
SNAI3-AS1	0.0972769	6.96374	2.23177	0.0267706	0.559485	-3.47506
KANK3	-0.125269	6.69155	-2.23175	0.0267719	0.559485	-3.47509
MFSD13A	0.133516	6.91943	2.23119	0.0268099	0.559732	-3.47617
RPL24	-0.0405075	12.7093	-2.23049	0.0268568	0.560165	-3.4775
MRC2	0.133998	6.61242	2.22897	0.0269599	0.561404	-3.4804
RNF135	0.149891	8.41209	2.22883	0.0269689	0.561404	-3.48066
C12orf76	-0.0673617	6.01287	-2.22686	0.0271031	0.563649	-3.48442
KCNE2	0.101948	4.98187	2.22642	0.0271328	0.563717	-3.48525
SNHG10	-0.068374	6.03545	-2.22584	0.0271722	0.563779	-3.48635
ANKRD22	0.278569	5.27328	2.22553	0.0271935	0.563779	-3.48695
ASPRV1	0.165161	7.95521	2.22485	0.0272401	0.563779	-3.48825
TBCE	-0.149396	6.46567	-2.22466	0.0272527	0.563779	-3.4886
CYP4F30P	0.0992227	2.5003	2.22444	0.0272677	0.563779	-3.48901
TMEM245	-0.0761136	6.71979	-2.22382	0.0273105	0.56381	-3.4902
GTF3C3	-0.120575	6.06601	-2.22351	0.0273317	0.56381	-3.49079
NAIP	0.162601	8.17803	2.22289	0.0273738	0.56381	-3.49196
NDUFB2-AS1	-0.165568	6.35591	-2.22288	0.0273748	0.56381	-3.49198
HCN2	0.0828292	4.57957	2.22241	0.0274073	0.563936	-3.49288
NCEH1	0.263512	5.23131	2.22132	0.0274817	0.564922	-3.49494
HACD1	0.083693	4.65634	2.22055	0.027535	0.565474	-3.49641
SESTD1	0.116616	6.98243	2.21985	0.0275836	0.565819	-3.49774
RTN4RL2	0.0944433	2.97343	2.21954	0.0276048	0.565819	-3.49833
PDK4	-0.166401	5.62316	-2.21897	0.0276439	0.565857	-3.4994
FAM169A	-0.207441	4.93655	-2.21875	0.0276597	0.565857	-3.49983
MALL	0.118867	4.20406	2.21796	0.027714	0.566427	-3.50132
COBLL1	-0.120481	4.40401	-2.21675	0.0277978	0.566775	-3.5036
GALE	0.0783055	4.75397	2.21659	0.0278089	0.566775	-3.50391
FXN	-0.0937732	5.72115	-2.21625	0.0278327	0.566775	-3.50456
PRRG4	0.189552	7.28643	2.21619	0.0278372	0.566775	-3.50468
NANOS1	-0.0964197	2.15816	-2.21541	0.0278915	0.567339	-3.50615
DPP4	-0.144314	7.07642	-2.21394	0.0279942	0.568887	-3.50894
COPS7B	-0.0619836	6.33404	-2.21192	0.0281358	0.569601	-3.51276
RAB36	0.164539	5.83359	2.21188	0.0281384	0.569601	-3.51283
ZNF319	0.139776	6.31147	2.21184	0.0281413	0.569601	-3.51291
TIGD5	0.0830855	5.67155	2.21167	0.0281529	0.569601	-3.51322
UTP4	-0.132814	8.15716	-2.21154	0.0281627	0.569601	-3.51348
TMCC2	0.155344	6.65807	2.20944	0.0283101	0.570421	-3.51744
HNRNPC	-0.0578538	8.94024	-2.20918	0.0283286	0.570421	-3.51793
G6PD	0.225484	7.49501	2.20774	0.0284308	0.570421	-3.52066
ABHD16B	0.0888618	4.66638	2.20765	0.0284374	0.570421	-3.52083
UQCC2	-0.104965	4.85359	-2.20732	0.0284608	0.570421	-3.52145
LNPEP	-0.0757345	7.05905	-2.20724	0.0284664	0.570421	-3.5216
PLXNA2	0.0768886	4.35853	2.20715	0.0284723	0.570421	-3.52176
FCN1	0.117488	10.1203	2.20689	0.0284907	0.570421	-3.52225
BUB3	-0.0793138	8.41632	-2.20649	0.0285198	0.570421	-3.52302
BBS5	-0.128786	3.12636	-2.20637	0.0285283	0.570421	-3.52325
TMEM190	0.108146	4.392	2.20594	0.0285588	0.570421	-3.52406
MYCT1	0.123539	4.21346	2.20584	0.0285656	0.570421	-3.52424
DGUOK	-0.0680187	7.53686	-2.20482	0.0286386	0.570421	-3.52617
ZIK1	-0.107378	5.09827	-2.2046	0.0286544	0.570421	-3.52659
TSACC	0.0932638	3.95082	2.20447	0.0286637	0.570421	-3.52683
GALNT18	0.0733888	3.71121	2.20445	0.0286651	0.570421	-3.52687
SSBP1	-0.10723	6.69481	-2.20437	0.0286708	0.570421	-3.52702
FAM225A	0.108563	3.74642	2.20397	0.028699	0.570421	-3.52776
RMND1	-0.0938443	5.88568	-2.20381	0.0287107	0.570421	-3.52807
ITGB5	0.190822	5.40544	2.20285	0.0287793	0.57079	-3.52987
NTNG2	0.143385	9.82418	2.20251	0.0288038	0.57079	-3.53052
VSIG10L	0.150177	3.92491	2.20243	0.0288094	0.57079	-3.53067
MYO9A	-0.0840346	6.57039	-2.20063	0.028939	0.57232	-3.53406
ALG2	-0.0850543	7.5706	-2.20061	0.0289402	0.57232	-3.53409
PTCD2	-0.0972684	4.91395	-2.1998	0.0289986	0.572667	-3.53562
TEC	0.104104	4.10251	2.1993	0.0290348	0.572667	-3.53656
DDX60L	0.193842	7.70289	2.19889	0.029064	0.572667	-3.53732
ZNF195	-0.187744	6.91996	-2.19888	0.029065	0.572667	-3.53735
LOC284950	0.106899	2.47451	2.19723	0.0291842	0.572706	-3.54044
C15orf32	0.109727	3.60917	2.19671	0.0292218	0.572706	-3.54142
MRPS33	-0.131048	4.66374	-2.19623	0.029257	0.572706	-3.54233
TKTL1	-0.163446	6.04548	-2.19612	0.0292652	0.572706	-3.54254
LINC00663	-0.0853016	3.85731	-2.19578	0.0292895	0.572706	-3.54317
LINC01750	0.110886	2.19178	2.19574	0.0292928	0.572706	-3.54325
SH3BP1	0.157888	4.96181	2.19564	0.0293002	0.572706	-3.54344
DIO3	0.0792629	5.04728	2.19536	0.02932	0.572706	-3.54395
FAM107B	-0.100372	9.43691	-2.19516	0.0293348	0.572706	-3.54433
SPATA3-AS1	0.0992436	4.75509	2.19516	0.0293352	0.572706	-3.54434
TSGA10	-0.104828	3.33893	-2.19478	0.0293623	0.572713	-3.54504
SP140	-0.109153	9.52122	-2.19346	0.0294588	0.573831	-3.54752
TTC3	-0.106454	7.77651	-2.19326	0.0294734	0.573831	-3.5479
MGAM	0.133312	11.5021	2.19276	0.0295104	0.574029	-3.54885
CIDEA	0.0937159	4.44291	2.19178	0.0295822	0.574697	-3.55068
CHD6	-0.0829123	7.06298	-2.19152	0.0296011	0.574697	-3.55116
LOC102723769	0.106716	3.79129	2.19061	0.0296677	0.574697	-3.55286
CAND1.11	0.089187	3.3121	2.19052	0.0296745	0.574697	-3.55304
KLHL18	0.0626184	5.82723	2.19046	0.0296793	0.574697	-3.55316
GLRA1	0.116739	3.48051	2.18903	0.0297847	0.575984	-3.55584
CHD1L	-0.0755244	6.82013	-2.18882	0.0297997	0.575984	-3.55622
CD177	0.456841	5.72838	2.18542	0.0300521	0.580269	-3.56259
SUFU	0.0574723	4.56625	2.1851	0.0300758	0.580269	-3.56318
NDUFAF4	-0.167909	6.23667	-2.18358	0.030189	0.580922	-3.56602
SEPTIN6	-0.119413	9.30749	-2.18263	0.03026	0.580922	-3.5678
GABRA4	0.0971039	2.8297	2.18258	0.0302642	0.580922	-3.5679
SDCBP2	0.112198	4.21027	2.18178	0.0303237	0.580922	-3.56938
MS4A1	-0.204747	8.83914	-2.18152	0.0303433	0.580922	-3.56987
SNHG32	-0.105722	10.2764	-2.18124	0.030364	0.580922	-3.57038
LOC100506271	0.102987	4.73335	2.18112	0.0303736	0.580922	-3.57062
POLR1HASP	-0.0678169	4.09739	-2.1811	0.0303744	0.580922	-3.57064
BLOC1S5	-0.105201	7.10624	-2.18095	0.0303859	0.580922	-3.57093
RPSA	-0.132112	12.0864	-2.18087	0.0303921	0.580922	-3.57108
PF4V1	0.447428	5.14611	2.18065	0.0304088	0.580922	-3.5715
BAIAP2-DT	0.0978073	6.42798	2.17798	0.0306101	0.583756	-3.57648
HOXC8	0.0884258	4.24215	2.17793	0.0306139	0.583756	-3.57657
TENT5D	0.103931	2.48847	2.17719	0.0306697	0.583756	-3.57795
C1QTNF2	0.10577	3.46923	2.17701	0.0306833	0.583756	-3.57828
ZNF268	-0.134379	4.80152	-2.17687	0.0306938	0.583756	-3.57854
PDCD6	-0.0784363	6.35445	-2.17605	0.0307561	0.584078	-3.58007
AKR1C3	-0.348344	6.37959	-2.17593	0.0307654	0.584078	-3.5803
SCAI	-0.146701	5.75771	-2.17536	0.0308083	0.584097	-3.58135
TMEM35B	-0.160816	8.25079	-2.17519	0.0308211	0.584097	-3.58166
SVIL	0.0801308	7.20114	2.17402	0.0309105	0.585272	-3.58385
PAQR4	0.0941505	5.1872	2.17181	0.0310792	0.587342	-3.58795
NDUFA10	-0.0494014	4.64319	-2.17153	0.0311011	0.587342	-3.58848
CEBPE	0.15364	6.26492	2.17151	0.0311024	0.587342	-3.58851
CHTF18	-0.0978301	5.63007	-2.17064	0.0311691	0.588083	-3.59013
TRIM68	-0.105295	8.94651	-2.16881	0.0313102	0.588637	-3.59354
TCEAL1	-0.112058	4.44998	-2.16854	0.0313309	0.588637	-3.59403
RBBP9	-0.0581622	3.79825	-2.16823	0.0313543	0.588637	-3.5946
DBH	0.0818395	4.16989	2.16755	0.0314072	0.588637	-3.59587
STATH	-0.0929898	2.17322	-2.16741	0.0314181	0.588637	-3.59613
CASD1	-0.11318	4.65123	-2.16674	0.03147	0.588637	-3.59737
ZBTB4	-0.0695162	10.0494	-2.16638	0.0314975	0.588637	-3.59803
TEX35	0.096286	4.07589	2.16617	0.0315139	0.588637	-3.59842
TMEM59L	0.0978236	5.6325	2.16617	0.0315141	0.588637	-3.59843
LLGL2	-0.0743557	5.96962	-2.16587	0.0315371	0.588637	-3.59898
ADAMTSL2	0.107773	4.357	2.16568	0.0315517	0.588637	-3.59933
ABHD1	0.0798885	2.91646	2.1656	0.031558	0.588637	-3.59948
MCU	0.0860338	7.98927	2.16536	0.031577	0.588637	-3.59993
SNHG16	-0.0929195	9.78518	-2.16497	0.0316071	0.588637	-3.60065
NRGN	0.238879	9.01691	2.16469	0.0316288	0.588637	-3.60117
NUP43	-0.128788	5.36378	-2.16424	0.0316634	0.588637	-3.60199
IRF2BPL	0.0612233	11.447	2.1642	0.031667	0.588637	-3.60208
PRSS3	0.0855508	5.02234	2.16367	0.0317079	0.588884	-3.60305
CD28	-0.0919365	5.26611	-2.16299	0.0317609	0.58899	-3.60431
SCN5A	0.109539	4.25858	2.16222	0.0318212	0.58899	-3.60574
MTMR3	0.14368	7.72875	2.16206	0.0318336	0.58899	-3.60603
RRM1	-0.106318	6.77182	-2.16194	0.0318429	0.58899	-3.60625
TANC2	0.121878	4.9757	2.16183	0.0318514	0.58899	-3.60645
PTPRK	-0.205547	5.28222	-2.16093	0.0319222	0.589787	-3.60813
C10orf126	0.081013	2.22778	2.15951	0.0320336	0.591333	-3.61075
MRPL49	-0.0754913	9.37347	-2.15817	0.0321389	0.592761	-3.61322
FREY1	0.0971841	3.76167	2.15783	0.0321664	0.592761	-3.61387
SMS	0.0671309	9.72996	2.15647	0.0322735	0.593495	-3.61637
ZNF626	-0.0775125	5.198	-2.15644	0.0322761	0.593495	-3.61643
GALK1	0.119945	6.18169	2.15607	0.032305	0.593495	-3.6171
IRF5	0.117873	6.34046	2.15465	0.0324178	0.593495	-3.61973
ANKRD40	-0.0668854	6.22453	-2.15433	0.0324431	0.593495	-3.62032
PNMA2	0.0745171	3.49774	2.15424	0.0324501	0.593495	-3.62048
PTN	0.0595794	3.89768	2.15408	0.0324629	0.593495	-3.62078
SHB	0.060931	4.24152	2.15391	0.0324766	0.593495	-3.62109
AK4	0.0769405	3.95169	2.15347	0.0325121	0.593495	-3.62191
MAP7D1	0.136323	8.98258	2.15342	0.032516	0.593495	-3.62201
KCNK7	0.0921512	4.73207	2.15316	0.0325367	0.593495	-3.62248
ZFR	-0.0966322	7.55858	-2.15312	0.0325397	0.593495	-3.62255
SNORA65	-0.0910283	4.22556	-2.15088	0.0327188	0.596252	-3.62668
EFCAB14	-0.0538039	7.81234	-2.15046	0.032752	0.596348	-3.62745
NAA15	-0.0969446	6.14852	-2.15004	0.032786	0.596459	-3.62823
RAD50	-0.118543	6.05491	-2.14939	0.0328381	0.596899	-3.62942
LINC01352	0.171205	4.75878	2.14884	0.0328818	0.596951	-3.63042
PLA2G7	0.217882	7.14044	2.1481	0.032942	0.596951	-3.6318
NR6A1	0.080136	4.98177	2.14806	0.032945	0.596951	-3.63187
PTPMT1	-0.0921127	6.4856	-2.14796	0.0329528	0.596951	-3.63205
TNFAIP6	0.25341	8.54749	2.14625	0.0330913	0.597893	-3.6352
SLC26A8	0.31029	6.41696	2.14618	0.0330967	0.597893	-3.63532
CLECL1P	-0.112688	4.92488	-2.14613	0.0331008	0.597893	-3.63542
LRMDA	0.171768	6.29037	2.14355	0.0333099	0.597893	-3.64015
ANKRD27	0.093848	8.98591	2.14336	0.0333256	0.597893	-3.64051
NOL3	0.0676013	4.92239	2.14277	0.0333735	0.597893	-3.64159
ZNF557	-0.129743	4.96822	-2.14245	0.0333991	0.597893	-3.64216
LINC01725	0.0876839	2.43915	2.14242	0.0334019	0.597893	-3.64223
FNDC10	0.0887264	5.64412	2.14227	0.0334139	0.597893	-3.6425
ST3GAL3-AS1	0.10608	2.56481	2.14096	0.0335207	0.597893	-3.6449
EPAS1	0.109708	5.09499	2.14083	0.0335317	0.597893	-3.64514
RPL41	-0.0435373	12.9489	-2.14018	0.0335853	0.597893	-3.64634
DBH-AS1	0.074396	4.83757	2.13969	0.0336251	0.597893	-3.64723
ISM1-AS1	-0.0959788	3.68278	-2.13961	0.033632	0.597893	-3.64739
NUDT16	0.0889203	5.76668	2.1394	0.0336488	0.597893	-3.64776
CASP10	0.057181	5.02335	2.13905	0.0336779	0.597893	-3.64841
TFAM	-0.057248	6.13996	-2.13895	0.0336855	0.597893	-3.64858
ADM	0.142155	10.4076	2.13822	0.0337457	0.597893	-3.64993
EVX1	0.0937675	4.89016	2.1381	0.0337556	0.597893	-3.65015
CFDP1	-0.142795	6.27916	-2.13748	0.033807	0.597893	-3.65129
CDC42EP3	0.0855192	9.76992	2.13725	0.0338258	0.597893	-3.65171
TMEM18	-0.122005	6.20235	-2.13712	0.0338365	0.597893	-3.65194
IPO11	-0.111058	4.55837	-2.13645	0.0338917	0.597893	-3.65317
PAQR9	0.122985	2.51794	2.13623	0.0339095	0.597893	-3.65356
CFAP58	0.112029	4.936	2.13608	0.0339221	0.597893	-3.65384
SRSF3	-0.102236	7.79864	-2.13585	0.0339407	0.597893	-3.65426
SLC5A9	0.142084	4.47073	2.13583	0.0339424	0.597893	-3.65429
ZFP30	-0.206884	4.21287	-2.13558	0.0339631	0.597893	-3.65475
IFNB1	0.0961048	2.86373	2.13557	0.0339644	0.597893	-3.65478
MIIP	0.10816	6.91018	2.13534	0.0339836	0.597893	-3.6552
MRPS5	-0.0547962	6.62769	-2.13506	0.0340064	0.597893	-3.65571
RPS11P6	0.111459	4.87279	2.13485	0.0340236	0.597893	-3.65609
DTYMK	-0.0815271	5.73287	-2.13469	0.0340369	0.597893	-3.65638
PRR3	-0.112361	6.3464	-2.13434	0.0340659	0.597893	-3.65702
PPOX	-0.0861267	4.60214	-2.1343	0.0340691	0.597893	-3.65709
KLRC4	-0.192729	3.12167	-2.13427	0.0340716	0.597893	-3.65715
AKT3	-0.113169	6.25225	-2.13425	0.0340738	0.597893	-3.65719
NOL8	-0.115375	8.2848	-2.13424	0.0340746	0.597893	-3.65721
ACSS2	0.116045	7.91903	2.13393	0.0341	0.597893	-3.65777
LINC00330	0.0950994	2.82466	2.13364	0.0341245	0.597893	-3.65831
DNAJC5	0.0838046	9.10367	2.13303	0.0341747	0.598281	-3.65942
DSEL	-0.113545	2.92693	-2.13139	0.0343115	0.600184	-3.66242
ATM	-0.119693	6.33553	-2.13104	0.0343407	0.600203	-3.66306
MICB	0.0973612	9.80912	2.13057	0.03438	0.600399	-3.66392
TMUB2	0.0754183	10.2305	2.12785	0.0346079	0.603142	-3.66888
SGCD	-0.0703767	3.14152	-2.12782	0.0346102	0.603142	-3.66893
WDCP	-0.106721	7.85266	-2.12732	0.034652	0.603142	-3.66983
TMEM92	0.10576	4.67452	2.12702	0.0346779	0.603142	-3.67039
QRSL1	-0.109684	4.94924	-2.12659	0.0347135	0.603142	-3.67116
LIMD1	-0.0779153	5.32129	-2.12609	0.0347557	0.603142	-3.67207
EVI5L	0.0720903	4.81346	2.12537	0.0348167	0.603142	-3.67339
EPDR1	0.174931	4.02902	2.12535	0.0348188	0.603142	-3.67344
MID2	-0.111697	5.02558	-2.12526	0.0348259	0.603142	-3.67359
MPND	0.12044	5.73767	2.1252	0.0348315	0.603142	-3.67371
DDX39B	-0.0743094	8.86917	-2.1245	0.0348902	0.603142	-3.67497
TMEM45B	0.196416	6.43858	2.12436	0.0349018	0.603142	-3.67522
PCBD2	-0.0782159	4.97282	-2.12434	0.0349042	0.603142	-3.67527
SNURF	-0.118482	7.48035	-2.1235	0.0349749	0.603875	-3.67679
ZC3HAV1	0.0730019	9.36463	2.12291	0.0350251	0.604041	-3.67787
GFI1B	0.154263	6.1624	2.12236	0.0350718	0.604041	-3.67887
MED21	-0.142592	6.22281	-2.12124	0.0351675	0.604041	-3.68091
SLC1A3	0.0966824	4.01698	2.1212	0.0351708	0.604041	-3.68098
TMEM108-AS1	-0.119662	2.94892	-2.12109	0.0351796	0.604041	-3.68117
A2MP1	-0.227154	5.70598	-2.12105	0.035183	0.604041	-3.68124
DDX18	-0.0799446	8.66088	-2.12082	0.0352033	0.604041	-3.68168
C5AR1	0.0647091	11.9855	2.12073	0.0352107	0.604041	-3.68183
ARID3A	0.0972176	7.43138	2.11977	0.0352926	0.604632	-3.68358
CD8B	-0.181108	6.208	-2.11938	0.035326	0.604632	-3.68429
B3GNT8	0.12032	6.10809	2.11933	0.0353301	0.604632	-3.68437
CRACR2B	0.106521	5.58249	2.11798	0.0354458	0.606064	-3.68683
SLC25A26	-0.135405	8.88574	-2.11727	0.0355064	0.606064	-3.68811
ELL3	-0.108016	7.18628	-2.11675	0.0355516	0.606064	-3.68906
MAF	-0.133713	5.68781	-2.11665	0.0355603	0.606064	-3.68924
RBL2	-0.0776774	10.3535	-2.11651	0.0355723	0.606064	-3.6895
FECH	0.269758	7.01329	2.1163	0.0355906	0.606064	-3.68988
IQCF3	0.0657207	2.92855	2.11529	0.0356771	0.606064	-3.6917
SYNJ2BP	-0.11111	6.04095	-2.11495	0.0357067	0.606064	-3.69232
DOC2B	0.0843286	4.46912	2.11474	0.0357246	0.606064	-3.6927
RCSD1	0.0495684	10.5906	2.11423	0.0357685	0.606064	-3.69362
C1orf226	0.121312	3.81438	2.11391	0.0357962	0.606064	-3.6942
FFAR1	0.0801726	4.21944	2.11367	0.0358174	0.606064	-3.69465
DCAF13	-0.0921083	4.58095	-2.11305	0.0358709	0.606064	-3.69576
CLDN20	-0.134411	4.44144	-2.11292	0.0358819	0.606064	-3.69599
PDCD2	-0.13364	6.32105	-2.11282	0.0358909	0.606064	-3.69618
SMAD3	-0.0572062	6.29917	-2.11277	0.0358953	0.606064	-3.69627
MRPL50	-0.112249	5.62521	-2.11163	0.0359942	0.606064	-3.69833
EPB41L4A-AS1	-0.128872	9.95529	-2.11143	0.036012	0.606064	-3.69871
C2CD2L	0.0763105	6.68133	2.11067	0.0360775	0.606064	-3.70007
HOXB-AS1	-0.170639	6.36011	-2.11067	0.0360775	0.606064	-3.70007
LINC01255	0.0839706	2.61367	2.11059	0.0360845	0.606064	-3.70021
LOC400622	0.0833531	2.91287	2.11059	0.0360846	0.606064	-3.70022
PRSS3P2	0.0971824	5.21097	2.11054	0.0360888	0.606064	-3.7003
ZNF383	-0.13364	4.95433	-2.11045	0.0360967	0.606064	-3.70047
PCYT1B	0.0920477	4.47418	2.11015	0.0361232	0.606064	-3.70102
POLR2J2	-0.0991292	7.33023	-2.10831	0.036284	0.607699	-3.70434
CNR2	-0.0997264	3.82708	-2.10797	0.0363136	0.607699	-3.70495
CRLF1	0.0853244	5.28016	2.1078	0.0363284	0.607699	-3.70526
ZFP92	0.10727	4.9094	2.10773	0.0363345	0.607699	-3.70538
LARP4	-0.11693	5.05652	-2.10571	0.0365116	0.610184	-3.70903
TRDC	-0.227499	9.69936	-2.10523	0.0365541	0.610282	-3.7099
GP1BB	0.274408	8.58169	2.105	0.0365746	0.610282	-3.71032
PLPP7	0.103421	3.98494	2.10434	0.0366328	0.610775	-3.71151
RCAN3	-0.127525	8.25779	-2.10323	0.0367304	0.611926	-3.7135
MSL1	0.0607409	8.70846	2.10202	0.0368377	0.613235	-3.71569
LOC101928214	0.0814573	4.53066	2.10159	0.0368758	0.613308	-3.71646
CD93	0.12697	9.41529	2.10132	0.0368996	0.613308	-3.71694
SLC22A16	0.209957	4.74167	2.10094	0.036934	0.613403	-3.71764
SLC36A1	0.0624318	6.0514	2.10052	0.0369709	0.613539	-3.71839
RABEPK	-0.084663	6.54514	-2.09967	0.0370467	0.61432	-3.71992
FXR1	-0.0946414	6.68735	-2.09927	0.0370828	0.614441	-3.72065
IPO9	-0.0891852	5.74877	-2.09803	0.0371929	0.6156	-3.72287
UMODL1	0.0900988	2.07936	2.09784	0.0372104	0.6156	-3.72322
HEATR4	-0.0842164	3.23615	-2.09701	0.0372841	0.615995	-3.7247
NAA35	-0.0664853	5.58426	-2.09611	0.0373651	0.615995	-3.72632
RRAS2	-0.147705	6.67865	-2.09563	0.0374084	0.615995	-3.72719
LOC105371215	0.0982846	2.11935	2.0951	0.0374561	0.615995	-3.72814
AFAP1	0.186532	3.77301	2.09473	0.037489	0.615995	-3.7288
TMEM19	-0.113212	5.68581	-2.09327	0.0376207	0.615995	-3.73142
LINC01260	-0.143841	4.7015	-2.09296	0.037649	0.615995	-3.73198
CLDND1	-0.146842	8.566	-2.09291	0.0376535	0.615995	-3.73207
ZNF514	-0.123894	6.04473	-2.09285	0.0376586	0.615995	-3.73217
NAA25	-0.12029	6.90933	-2.09277	0.0376655	0.615995	-3.73231
DLGAP1-AS2	0.100127	3.75943	2.09268	0.0376737	0.615995	-3.73247
HPCAL4	-0.115435	5.31142	-2.09266	0.0376758	0.615995	-3.73252
EXOC4	-0.0826589	6.28385	-2.09259	0.0376819	0.615995	-3.73264
BCL2L2	0.0821847	4.43086	2.09227	0.0377107	0.615995	-3.73321
KBTBD4	-0.0636038	7.11188	-2.09141	0.0377891	0.615995	-3.73476
BCL11A	-0.116473	8.13202	-2.0909	0.0378357	0.615995	-3.73568
LRRC3C	-0.156962	4.60066	-2.09058	0.0378641	0.615995	-3.73624
IFT20	-0.0872389	8.49359	-2.09039	0.0378816	0.615995	-3.73659
PCOLCE2	0.112191	2.95466	2.09011	0.037907	0.615995	-3.73709
SBDSP1	-0.155385	7.51886	-2.09007	0.0379107	0.615995	-3.73716
N6AMT1	-0.0824304	4.1002	-2.08987	0.037929	0.615995	-3.73753
TBX22	-0.0807142	1.99766	-2.08955	0.0379579	0.615995	-3.73809
CPM	0.100958	5.57054	2.08937	0.0379747	0.615995	-3.73843
SHANK2-AS3	0.0833945	3.25716	2.08928	0.0379826	0.615995	-3.73858
GNAT1	0.073357	4.11088	2.08909	0.038	0.615995	-3.73892
GALNT12	-0.129047	5.0313	-2.08896	0.0380118	0.615995	-3.73915
CAMK4	-0.136265	6.42775	-2.08895	0.038013	0.615995	-3.73918
SCFD1	-0.0994007	7.51305	-2.08819	0.0380822	0.616296	-3.74054
CABP5	0.143018	4.38929	2.08811	0.0380893	0.616296	-3.74068
DNASE2	0.125578	6.61402	2.08744	0.0381501	0.616358	-3.74187
TMEM184B	0.094325	8.25335	2.08686	0.0382036	0.616358	-3.74292
MLANA	-0.0718788	3.17278	-2.08666	0.0382216	0.616358	-3.74327
LSMEM1	0.142325	6.74435	2.08649	0.0382373	0.616358	-3.74358
LINC01545	0.121917	4.12728	2.08621	0.0382628	0.616358	-3.74407
USB1	0.0788458	7.7254	2.08612	0.0382708	0.616358	-3.74423
MKNK1	0.0974049	8.6773	2.08586	0.0382951	0.616358	-3.7447
CXCL5	0.118138	3.99951	2.08543	0.0383343	0.616523	-3.74547
PHOSPHO2	-0.163307	3.66678	-2.08502	0.0383723	0.616671	-3.74621
CMC2	-0.107919	8.41685	-2.08442	0.0384271	0.617087	-3.74727
SLC25A40	0.157833	5.62329	2.08373	0.0384908	0.617646	-3.74851
CEPT1	-0.0948039	9.29594	-2.08306	0.0385526	0.618174	-3.74971
TTL	-0.0592184	5.85141	-2.08234	0.0386189	0.618237	-3.75099
HIRA	0.0561145	5.30814	2.08226	0.0386258	0.618237	-3.75113
TLX2	0.0805544	4.14541	2.08207	0.0386434	0.618237	-3.75147
LRRC69	-0.115667	6.69743	-2.08121	0.0387232	0.618418	-3.75301
ABCB1	-0.144237	6.10409	-2.0808	0.0387609	0.618418	-3.75374
SEH1L	-0.092223	7.78354	-2.08064	0.0387757	0.618418	-3.75402
TMEM255B	0.108643	4.92611	2.08043	0.0387954	0.618418	-3.7544
INPP5J	0.0970498	4.17279	2.08034	0.0388042	0.618418	-3.75457
BRF1	0.0690276	4.7657	2.08007	0.0388285	0.618418	-3.75504
RBM20	-0.123325	2.61291	-2.07958	0.0388741	0.618615	-3.75591
MCTP1	0.1913	7.34025	2.07932	0.0388988	0.618615	-3.75639
GPX5	0.0853869	2.48823	2.07895	0.038933	0.618698	-3.75704
SLC38A1	-0.0735057	7.67767	-2.07805	0.039017	0.618855	-3.75865
MAP1LC3B2	0.105648	4.94995	2.07799	0.0390218	0.618855	-3.75875
PCGF3-AS1	-0.207908	5.10744	-2.07791	0.0390298	0.618855	-3.7589
NR2F6	0.0868328	5.30851	2.07644	0.0391667	0.620516	-3.76151
CHPF	0.0929735	4.93888	2.07616	0.0391926	0.620516	-3.76201
EXOSC9	-0.0938424	9.93765	-2.07577	0.0392294	0.620638	-3.76271
TRIM32	-0.102415	5.26111	-2.07394	0.0394012	0.621265	-3.76597
FABP6-AS1	0.0924773	3.05932	2.07342	0.0394502	0.621265	-3.7669
LUZP1	-0.0685949	6.69528	-2.07327	0.0394645	0.621265	-3.76716
DIPK1A	-0.136379	5.83444	-2.07311	0.0394794	0.621265	-3.76745
CDKN2AIPNL	-0.073394	4.5103	-2.07309	0.0394809	0.621265	-3.76748
ZNF544	-0.104063	5.9822	-2.07278	0.0395103	0.621265	-3.76803
FAM83E	0.0969782	4.96099	2.0722	0.0395649	0.621265	-3.76906
PCNX2	-0.0833536	5.20913	-2.07194	0.0395893	0.621265	-3.76952
GIMAP2	-0.145811	9.18113	-2.07169	0.0396129	0.621265	-3.76996
VCL	0.0917727	7.62338	2.07163	0.0396187	0.621265	-3.77007
ETV2	0.102584	4.566	2.07118	0.0396612	0.621265	-3.77088
SKIC3	-0.129488	5.8177	-2.07016	0.0397577	0.621265	-3.77269
UBE2G2	-0.0701447	7.43946	-2.06999	0.0397738	0.621265	-3.77299
RAB29	-0.0551353	7.19837	-2.06972	0.0397993	0.621265	-3.77347
DIRC3	0.0883436	3.70813	2.06946	0.0398237	0.621265	-3.77392
DENND11	-0.0957932	7.64994	-2.06881	0.039885	0.621265	-3.77507
VSTM1	0.2483	8.18848	2.06869	0.0398968	0.621265	-3.77529
CLTCL1	0.162664	6.40563	2.06809	0.0399542	0.621265	-3.77636
TRAV20	-0.140918	6.61329	-2.0679	0.0399719	0.621265	-3.77669
CUL1	-0.0826519	7.54249	-2.0677	0.0399913	0.621265	-3.77706
GASK1B	0.158321	6.33647	2.06746	0.0400133	0.621265	-3.77747
JPT2	-0.0725652	7.17496	-2.0671	0.0400484	0.621265	-3.77812
SERPINA2	0.100117	2.79968	2.06709	0.0400487	0.621265	-3.77813
HOPX	-0.0836436	4.1447	-2.06688	0.0400686	0.621265	-3.7785
APOBEC3D	0.0986984	3.99704	2.06678	0.0400784	0.621265	-3.77868
FAM66C	-0.0711396	3.41489	-2.06678	0.0400787	0.621265	-3.77868
LRRC71	0.0923503	4.03732	2.06676	0.0400804	0.621265	-3.77872
FAM222A-AS1	0.0818886	3.83111	2.06673	0.0400835	0.621265	-3.77877
ZNF827	-0.087864	5.54735	-2.06524	0.0402257	0.622796	-3.78141
NUTF2	-0.0758946	7.22215	-2.06444	0.0403021	0.622796	-3.78283
UTP14A	-0.148049	5.80291	-2.06441	0.0403047	0.622796	-3.78288
SPAG11A	0.0968348	4.51511	2.06421	0.0403245	0.622796	-3.78324
FCF1	-0.084531	5.60451	-2.06404	0.04034	0.622796	-3.78353
ZNF75A	-0.0965347	8.12957	-2.06361	0.0403817	0.622796	-3.7843
CCR5	-0.159817	8.478	-2.06353	0.0403893	0.622796	-3.78444
GRINA	0.190509	6.47287	2.06326	0.0404155	0.622796	-3.78492
LINC02282	0.108157	3.50032	2.06287	0.0404528	0.622812	-3.78561
CNTRL	-0.0835215	8.21299	-2.06264	0.0404749	0.622812	-3.78602
ARHGEF10	-0.0882342	3.54945	-2.06215	0.0405221	0.62309	-3.78689
ADAM12	-0.0950942	4.08229	-2.06182	0.0405538	0.623098	-3.78747
CFAP68	-0.126936	5.67924	-2.06092	0.0406402	0.623098	-3.78905
HSPB7	0.0724694	4.00092	2.06086	0.0406463	0.623098	-3.78917
WDR77	-0.0698437	7.55951	-2.06081	0.0406507	0.623098	-3.78925
ITPK1-AS1	0.112225	8.04077	2.06063	0.0406685	0.623098	-3.78957
NPAT	-0.0874462	6.00364	-2.06028	0.0407024	0.62317	-3.79019
PSMF1	0.14736	9.03668	2.05945	0.0407825	0.623522	-3.79166
ULK4	-0.0742251	4.50598	-2.05894	0.0408313	0.623522	-3.79255
PDGFRL	0.0898716	4.16492	2.0589	0.0408353	0.623522	-3.79262
RPRML	0.117839	5.22236	2.05883	0.0408422	0.623522	-3.79275
TBC1D2	0.13717	6.51221	2.05832	0.0408921	0.623818	-3.79366
WASIR2	-0.130003	3.48949	-2.05803	0.04092	0.623818	-3.79417
RBBP4	-0.0687945	7.43069	-2.05711	0.0410094	0.62442	-3.79579
GYG1	0.112263	9.40497	2.05673	0.0410462	0.62442	-3.79646
KLHDC8A	0.14247	4.21825	2.05672	0.0410472	0.62442	-3.79648
BTBD9	0.0474324	4.9382	2.05588	0.041129	0.624887	-3.79796
CDCA8	-0.150098	4.64196	-2.0558	0.0411364	0.624887	-3.79809
GNS	0.0758394	9.18915	2.05498	0.0412171	0.624944	-3.79955
RASA3	-0.0588938	6.51237	-2.05461	0.0412528	0.624944	-3.8002
RPP30	-0.0775437	5.19718	-2.05365	0.0413464	0.624944	-3.80189
MAP2K3	0.0782223	11.8352	2.0531	0.0414006	0.624944	-3.80286
MOCS1	0.0819295	3.81703	2.05307	0.041404	0.624944	-3.80292
CYB561	-0.0994285	6.98635	-2.05305	0.0414053	0.624944	-3.80295
C5orf15	0.0832274	6.36078	2.05288	0.0414224	0.624944	-3.80325
ATOSB	0.106806	7.79891	2.05264	0.0414456	0.624944	-3.80367
LZTS1	0.060764	4.27634	2.05239	0.0414701	0.624944	-3.80411
JDP2	0.140785	5.87276	2.05214	0.0414948	0.624944	-3.80455
GPAM	-0.131691	5.14447	-2.05203	0.041506	0.624944	-3.80475
POP5	-0.151835	8.36755	-2.05193	0.0415156	0.624944	-3.80493
ART5	0.08866	3.64186	2.05188	0.0415206	0.624944	-3.80501
MRPS31	-0.0870235	5.6667	-2.05037	0.0416685	0.626431	-3.80766
ZNF80	-0.100743	4.4601	-2.05028	0.041678	0.626431	-3.80783
STMP1	0.124356	8.33579	2.04945	0.04176	0.627222	-3.80929
HECTD1	-0.0686584	5.85449	-2.04779	0.0419233	0.629	-3.8122
TLR6	0.11784	7.36421	2.04755	0.0419474	0.629	-3.81263
ITPK1	0.0686722	6.86329	2.04736	0.0419667	0.629	-3.81297
LINC00494	-0.171359	5.86702	-2.04679	0.0420231	0.629403	-3.81397
SMOX	0.10747	5.38681	2.04586	0.0421156	0.629577	-3.8156
PITPNM1	0.108179	6.28191	2.04569	0.0421324	0.629577	-3.8159
GDE1	0.116585	7.7926	2.04499	0.0422016	0.629577	-3.81712
FLJ42627	0.0605482	5.95973	2.04498	0.0422028	0.629577	-3.81714
AIFM1	-0.0716441	7.56674	-2.04456	0.0422442	0.629577	-3.81787
GART	-0.077675	5.74996	-2.04426	0.0422742	0.629577	-3.8184
CDH16	0.103401	4.1889	2.04418	0.0422826	0.629577	-3.81855
LOC100505774	0.101513	3.8951	2.04398	0.042303	0.629577	-3.81891
ZNF19	-0.0732424	4.87938	-2.04327	0.0423739	0.629577	-3.82015
LOC339539	0.0900129	4.38639	2.04321	0.0423791	0.629577	-3.82024
NOL9	-0.0782433	7.13565	-2.0431	0.0423901	0.629577	-3.82043
PGRMC1	0.110234	6.64612	2.04296	0.0424041	0.629577	-3.82068
PTGR1	0.0859895	3.16302	2.04273	0.0424278	0.629577	-3.8211
HDGFL2	0.083327	6.85798	2.04253	0.0424474	0.629577	-3.82144
LOC105376196	0.0842872	3.30983	2.04173	0.0425281	0.630336	-3.82285
DNAJC6	0.149972	3.07847	2.04115	0.0425854	0.630609	-3.82385
SRXN1	0.186488	7.91549	2.04092	0.0426085	0.630609	-3.82425
MIR503HG	0.0729149	4.48184	2.04066	0.0426351	0.630609	-3.82472
CMPK2	0.299328	7.64842	2.03961	0.042741	0.631739	-3.82656
DDHD1-DT	-0.147469	5.5775	-2.03872	0.0428307	0.632626	-3.82812
SLIT3-AS1	0.0992344	3.50675	2.03797	0.0429065	0.633308	-3.82944
DTD1-AS1	0.110315	3.51604	2.03762	0.0429415	0.633387	-3.83004
MRPL11	-0.134652	7.23806	-2.03628	0.0430773	0.634423	-3.83239
CTSG	0.191436	4.67964	2.03627	0.0430778	0.634423	-3.8324
SNHG18	0.0912235	3.60672	2.03605	0.0431009	0.634423	-3.83279
ZNF615	-0.131099	7.50582	-2.03574	0.0431315	0.634437	-3.83332
UGT1A1	0.089257	3.07866	2.03507	0.0431997	0.634835	-3.8345
POLR3K	-0.0737988	5.01391	-2.03489	0.043218	0.634835	-3.83481
ATP8B2	-0.0818086	8.55165	-2.03374	0.0433355	0.636071	-3.83683
TRAV22	-0.177748	4.79541	-2.03348	0.0433617	0.636071	-3.83728
CYB5R3	0.100148	7.63045	2.03267	0.043444	0.636653	-3.83868
SIKE1	-0.126464	5.60308	-2.03232	0.0434805	0.636653	-3.83931
PRUNE2	0.102806	2.69151	2.03221	0.0434908	0.636653	-3.83948
SART3	-0.0522004	7.05644	-2.03031	0.0436862	0.639076	-3.84281
GATD3	-0.0670092	10.5629	-2.02937	0.0437824	0.640044	-3.84444
DNAJB4	-0.112783	3.24214	-2.02898	0.0438223	0.64006	-3.84512
LOC285819	0.112481	7.05841	2.02868	0.0438534	0.64006	-3.84565
CD59	0.123727	7.5698	2.02832	0.0438905	0.64006	-3.84628
ITGAD	0.105794	3.86269	2.02804	0.0439193	0.64006	-3.84676
COL4A4	-0.140648	4.50547	-2.0279	0.0439333	0.64006	-3.847
TTC19	-0.0923385	8.21196	-2.02619	0.0441102	0.642199	-3.84998
MEF2A	0.116404	6.59527	2.02571	0.0441598	0.642482	-3.85081
R3HDM4	0.108416	11.2661	2.02527	0.0442054	0.642709	-3.85158
CIRBP	-0.0583396	10.3614	-2.02446	0.0442898	0.642879	-3.853
DCDC1	-0.0716078	2.03874	-2.02444	0.044292	0.642879	-3.85303
LINC02843	0.0850933	3.91202	2.02411	0.0443253	0.642879	-3.85359
RABL2B	-0.0888847	9.54232	-2.024	0.0443375	0.642879	-3.85379
DDAH1	0.0796536	3.55591	2.02355	0.0443835	0.64311	-3.85456
CD151	0.120946	7.21095	2.02246	0.0444973	0.643603	-3.85646
MICAL2	0.118268	8.42047	2.02231	0.044513	0.643603	-3.85672
PDE6H	0.151016	3.6326	2.02229	0.0445156	0.643603	-3.85677
EIF5	-0.060223	8.77282	-2.02207	0.0445381	0.643603	-3.85714
CHRDL2	0.0870927	4.47801	2.02166	0.0445812	0.64379	-3.85786
KRTAP10-11	0.0999899	5.32805	2.02098	0.0446513	0.644244	-3.85903
DDHD1	-0.0806365	5.25928	-2.02078	0.044673	0.644244	-3.85939
L3HYPDH	-0.101379	4.74164	-2.02042	0.04471	0.644343	-3.86
DENND10P1	0.0929657	8.85726	2.01949	0.0448081	0.644393	-3.86162
NFAM1	0.0932588	10.1653	2.01907	0.0448519	0.644393	-3.86235
WNT10B	-0.137246	4.91816	-2.01866	0.0448946	0.644393	-3.86305
CHPF2	0.0839443	7.19973	2.01832	0.0449302	0.644393	-3.86364
INSC	0.250601	6.0583	2.01819	0.0449445	0.644393	-3.86388
ADAM19	0.0685998	7.94585	2.01763	0.0450032	0.644393	-3.86485
MIP	0.101103	3.31174	2.01757	0.045009	0.644393	-3.86494
SLC37A2	0.12618	6.0552	2.01734	0.0450339	0.644393	-3.86535
SYMPK	-0.0806505	6.23008	-2.01661	0.0451104	0.644393	-3.86661
CER1	0.0980703	3.65495	2.01637	0.0451356	0.644393	-3.86702
TRDV3	-0.187021	6.75119	-2.0163	0.0451436	0.644393	-3.86715
PLAAT1	0.0874023	3.55775	2.01622	0.0451521	0.644393	-3.8673
TOP6BL	-0.0979779	5.55948	-2.01612	0.0451627	0.644393	-3.86747
ZNF277	-0.0844333	7.14883	-2.01604	0.0451705	0.644393	-3.8676
SEC61B	-0.0920111	8.67229	-2.01568	0.0452088	0.644393	-3.86822
LINC00685	-0.1218	7.38838	-2.01551	0.0452269	0.644393	-3.86852
BDKRB1	0.105996	3.37816	2.01513	0.0452665	0.644393	-3.86917
CTNNB1	0.0637257	7.19108	2.01447	0.045337	0.644393	-3.87032
CD63	0.139698	11.0694	2.01443	0.0453411	0.644393	-3.87039
MSRA	0.104495	6.48611	2.01356	0.0454325	0.644393	-3.87188
RSRC2	-0.0629396	8.34749	-2.01279	0.0455145	0.644393	-3.87322
DHCR7	0.0851968	4.89099	2.01262	0.0455324	0.644393	-3.87351
IL7	-0.0890358	2.47586	-2.0126	0.0455347	0.644393	-3.87355
NUMB	0.0807858	9.20842	2.01248	0.0455479	0.644393	-3.87376
KAZALD1	0.0671524	4.00394	2.01226	0.0455715	0.644393	-3.87415
SLC25A36	-0.103556	6.11101	-2.0121	0.045588	0.644393	-3.87441
UHRF2	-0.0740605	9.76033	-2.01168	0.0456325	0.644393	-3.87514
RNASEH1-DT	-0.134079	5.85516	-2.01167	0.0456335	0.644393	-3.87515
DMRTC2	0.225521	4.90819	2.01136	0.0456666	0.644393	-3.87569
MYC	-0.179468	8.00985	-2.011	0.0457049	0.644393	-3.87631
ID3	-0.112982	7.68924	-2.01084	0.0457225	0.644393	-3.8766
ABCG4	0.0882229	4.61755	2.01062	0.0457459	0.644393	-3.87698
RNASE4	0.182622	5.386	2.01054	0.0457541	0.644393	-3.87711
AKIRIN2	0.0945674	6.79662	2.01043	0.0457662	0.644393	-3.8773
NAT8B	0.132435	4.9756	2.0104	0.0457694	0.644393	-3.87736
EXOC6	0.103591	5.48234	2.00947	0.0458685	0.645021	-3.87896
KLHL42	-0.0886388	6.19352	-2.00931	0.0458856	0.645021	-3.87923
SOX4	0.07689	5.48023	2.00913	0.0459047	0.645021	-3.87954
CDY1	0.0770764	2.69192	2.00844	0.0459792	0.645643	-3.88074
SEPTIN5	0.106148	5.84695	2.00776	0.0460516	0.646235	-3.88191
RASAL1	0.0730553	3.84497	2.00704	0.0461286	0.646504	-3.88314
METTL3	-0.0925981	8.04211	-2.00697	0.0461368	0.646504	-3.88328
WDR97	0.0895622	4.10607	2.00674	0.0461616	0.646504	-3.88367
LRRC37A4P	-0.176073	8.53495	-2.00586	0.0462557	0.647398	-3.88518
DCC	0.0609518	2.50525	2.00414	0.0464418	0.649386	-3.88815
TREML1	0.219423	7.11349	2.00261	0.0466067	0.649386	-3.89078
CD101	0.1637	6.2895	2.00202	0.0466709	0.649386	-3.8918
MLXIPL	0.0916877	4.82267	2.00189	0.0466849	0.649386	-3.89202
TPP2	-0.0743012	7.04256	-2.00114	0.046767	0.649386	-3.89332
PXN	0.0873902	7.48156	2.00107	0.0467743	0.649386	-3.89343
YARS2	-0.0855251	7.38593	-2.00103	0.0467781	0.649386	-3.89349
KCNJ2-AS1	0.173402	4.24361	2.001	0.0467817	0.649386	-3.89355
STAT4	-0.151715	8.78891	-2.00078	0.0468058	0.649386	-3.89393
CRABP2	0.0842766	5.56264	2.00073	0.0468115	0.649386	-3.89402
OTUD6B-AS1	-0.159136	4.18676	-2.00046	0.0468407	0.649386	-3.89448
THAP6	-0.0824671	5.19594	-2.00035	0.046852	0.649386	-3.89466
AFTPH	-0.0356678	10.6917	-2.00003	0.0468875	0.649386	-3.89522
SLC49A3	0.114714	5.07075	1.99997	0.0468942	0.649386	-3.89533
ZNF510	-0.0705187	5.0599	-1.99959	0.0469356	0.649386	-3.89598
MYO10	0.0837187	4.01147	1.99944	0.0469517	0.649386	-3.89623
PHYHD1	0.0829827	3.66582	1.99904	0.0469948	0.649386	-3.89691
MAK16	-0.122311	8.7253	-1.99889	0.0470119	0.649386	-3.89718
IL10	0.0975487	2.36576	1.99869	0.0470332	0.649386	-3.89752
RNASE2CP	0.203322	6.4195	1.99862	0.0470408	0.649386	-3.89763
PYCR3	0.109543	4.60611	1.99837	0.047069	0.649386	-3.89808
CCDC70	0.101849	2.99953	1.99817	0.0470906	0.649386	-3.89842
NBAS	-0.0746632	6.05059	-1.99811	0.047097	0.649386	-3.89852
NANOS3	0.100122	5.13617	1.99675	0.0472456	0.650624	-3.90085
LOC100506446	0.0857354	4.58496	1.99657	0.0472654	0.650624	-3.90116
PLAGL1	0.162682	6.9333	1.99645	0.0472782	0.650624	-3.90136
HAUS5	-0.0933838	6.93982	-1.99566	0.0473659	0.651312	-3.90273
DNAJC27	-0.073844	6.22145	-1.99536	0.0473989	0.651312	-3.90324
HPYR1	0.0752085	2.95547	1.99504	0.0474332	0.651312	-3.90378
GSK3A	0.111142	6.46132	1.99489	0.0474505	0.651312	-3.90405
ARV1	-0.103482	5.3104	-1.99438	0.0475064	0.651312	-3.90492
TTC7B-AS1	0.126473	3.32222	1.99411	0.0475356	0.651312	-3.90537
CSNK1D	0.107242	9.11249	1.99406	0.0475417	0.651312	-3.90547
NOTCH3	0.0867161	4.77377	1.99322	0.0476347	0.65193	-3.90691
LOC105379448	0.095062	2.70785	1.99296	0.0476624	0.65193	-3.90734
MEFV	0.0692904	10.6285	1.99281	0.0476794	0.65193	-3.9076
DUX1	0.0803319	5.97124	1.99254	0.0477089	0.65193	-3.90806
LOC100131532	0.081166	4.50335	1.99181	0.0477899	0.652619	-3.90931
RYR1	-0.169261	4.31215	-1.99137	0.047839	0.652716	-3.91007
SOX10	0.0856312	3.25248	1.9912	0.0478581	0.652716	-3.91037
TRAV30	-0.107612	5.24764	-1.9907	0.0479129	0.652744	-3.91121
ZNF669	-0.127943	6.11921	-1.99063	0.0479212	0.652744	-3.91134
STARD8	0.0919693	4.97828	1.98975	0.048018	0.653645	-3.91283
INSIG1	-0.0829903	7.20974	-1.98938	0.0480598	0.653797	-3.91348
FRG1JP	-0.189935	4.86212	-1.98872	0.0481328	0.654051	-3.9146
GABPB1-AS1	-0.0714346	6.83094	-1.98866	0.0481398	0.654051	-3.9147
SLC15A4	0.0676941	8.72574	1.98739	0.0482813	0.654898	-3.91687
TGDS	-0.155615	5.12509	-1.9867	0.0483582	0.654898	-3.91805
NAB2	0.0710863	5.40395	1.98659	0.0483712	0.654898	-3.91824
GEMIN6	-0.107916	6.06822	-1.98643	0.0483888	0.654898	-3.91851
ZBTB40	-0.0816633	6.55183	-1.98628	0.0484055	0.654898	-3.91877
SETDB2	-0.0655871	5.73642	-1.98627	0.0484067	0.654898	-3.91879
SPATC1L	0.0901463	5.75179	1.9859	0.0484476	0.654898	-3.91941
DCLRE1C	-0.0696091	7.43766	-1.98571	0.0484691	0.654898	-3.91974
HK3	0.145382	6.84136	1.98563	0.048478	0.654898	-3.91987
KIF1C	0.0701816	5.1598	1.98419	0.0486401	0.655059	-3.92234
BMX	0.189624	5.79087	1.9838	0.0486836	0.655059	-3.923
PPP2R3B	0.0707571	4.92572	1.98362	0.0487042	0.655059	-3.92331
PRRC2C	-0.0637894	10.1241	-1.98345	0.0487232	0.655059	-3.9236
PUS3	-0.090592	7.41358	-1.98334	0.0487357	0.655059	-3.92379
THUMPD3	-0.0783715	6.6548	-1.98301	0.0487725	0.655059	-3.92434
LAT2	0.0662068	7.40106	1.98294	0.0487808	0.655059	-3.92447
DNAJC1	-0.0698567	7.28966	-1.98292	0.0487834	0.655059	-3.92451
LINC00862	0.146081	4.46284	1.98288	0.048787	0.655059	-3.92456
WDR19	-0.0636068	4.57968	-1.98278	0.0487988	0.655059	-3.92474
CCR9	-0.135804	4.40297	-1.98231	0.0488513	0.655059	-3.92554
LTB	-0.0878794	8.67718	-1.98225	0.048858	0.655059	-3.92564
NINJ2	0.136423	10.3662	1.98125	0.0489717	0.655909	-3.92735
MLLT3	-0.123869	6.93893	-1.98072	0.0490317	0.655909	-3.92826
C5orf63	-0.0905513	5.09225	-1.98067	0.0490368	0.655909	-3.92833
SLC11A1	0.118771	7.74796	1.98019	0.0490913	0.655909	-3.92915
ANKFY1	0.0456438	5.57526	1.98018	0.0490924	0.655909	-3.92917
TP53RK	-0.0971309	7.049	-1.9796	0.0491579	0.655909	-3.93015
ZNF551	-0.0727989	4.25223	-1.97929	0.0491927	0.655909	-3.93068
SH2D5	0.113323	4.39695	1.97929	0.0491931	0.655909	-3.93068
LINC03031	0.0604484	3.51136	1.97831	0.0493047	0.655909	-3.93235
LINC01703	0.073072	4.18672	1.9783	0.0493053	0.655909	-3.93236
AKAP11	-0.119971	6.18034	-1.97789	0.0493526	0.655909	-3.93307
BRI3	0.0946152	8.52438	1.97764	0.0493804	0.655909	-3.93348
CORO2A	0.12453	7.00134	1.97736	0.0494123	0.655909	-3.93396
COX8C	-0.113071	2.3499	-1.97671	0.0494862	0.655909	-3.93506
ATP6V1C1	0.0971052	6.31032	1.97668	0.0494896	0.655909	-3.93512
GM2A	0.103535	6.17448	1.97622	0.0495431	0.655909	-3.93591
TFEB	0.14222	7.02929	1.97599	0.0495692	0.655909	-3.9363
STIP1	-0.0905854	8.71644	-1.97597	0.0495707	0.655909	-3.93632
PPP1R3C	0.0730633	3.37663	1.97547	0.0496277	0.655909	-3.93717
FBXO45	-0.119084	5.72942	-1.97502	0.0496796	0.655909	-3.93794
ACSS3	0.0772579	2.29542	1.97482	0.0497026	0.655909	-3.93828
AP1M2	0.0794524	3.71263	1.97478	0.0497076	0.655909	-3.93836
MEP1A	0.0906733	3.33125	1.97474	0.049712	0.655909	-3.93842
CTDSPL	0.120261	4.94215	1.97399	0.0497972	0.655909	-3.93968
KRBOX4	-0.140679	6.43634	-1.97371	0.0498296	0.655909	-3.94016
PTH2R	0.107571	2.72033	1.97313	0.049896	0.655909	-3.94115
RXRA	0.112881	9.34366	1.97297	0.0499148	0.655909	-3.94142
POLR2M	-0.121782	6.72037	-1.97274	0.0499415	0.655909	-3.94182
FAM98A	-0.0882423	7.49585	-1.97236	0.0499853	0.655909	-3.94246
SDHD	0.21492	6.75911	1.97221	0.0500017	0.655909	-3.9427
EMC1	-0.0849566	6.22043	-1.97213	0.0500111	0.655909	-3.94284
VSTM2L	0.0986893	4.13679	1.97101	0.05014	0.655909	-3.94474
CATIP-AS1	0.169244	5.61647	1.97101	0.0501407	0.655909	-3.94475
GPR89A	-0.0909443	8.91395	-1.97082	0.0501618	0.655909	-3.94506
STAG3L4	-0.118209	5.66962	-1.97074	0.050171	0.655909	-3.9452
BMPR2	-0.0959571	4.90996	-1.9707	0.0501754	0.655909	-3.94526
ATP8A2	-0.0947832	3.81802	-1.97065	0.0501817	0.655909	-3.94535
EGFL7	0.0766689	5.03829	1.9706	0.0501871	0.655909	-3.94543
SCARF1	0.093556	7.57602	1.97056	0.0501927	0.655909	-3.94551
MSTO1	-0.0847709	8.77807	-1.97044	0.0502057	0.655909	-3.94571
CPD	0.118142	8.77666	1.97032	0.0502196	0.655909	-3.94591
KCTD4	0.0611553	2.96014	1.96952	0.0503118	0.655909	-3.94726
CD109	0.0808279	3.90055	1.96949	0.0503153	0.655909	-3.94731
NFASC	0.0754092	4.08445	1.96935	0.0503323	0.655909	-3.94756
SVIP	-0.14277	5.23764	-1.96923	0.0503459	0.655909	-3.94776
TNXB	0.0650345	4.95568	1.96886	0.0503886	0.655909	-3.94839
ATP6V1B2	0.0688702	11.2018	1.96849	0.0504312	0.655909	-3.94901
HSD17B6	-0.0747628	3.20023	-1.96838	0.0504445	0.655909	-3.9492
PERM1	0.0938793	5.37603	1.96834	0.0504493	0.655909	-3.94927
ZSWIM5	-0.137908	5.99484	-1.96824	0.0504599	0.655909	-3.94943
LENG8	-0.094056	11.8609	-1.96801	0.0504876	0.655909	-3.94983
SPINT2	0.0913882	8.66489	1.96747	0.0505493	0.656185	-3.95073
PRRC1	-0.0877963	8.04576	-1.96729	0.0505703	0.656185	-3.95104
PARVB	0.121979	6.40545	1.96662	0.0506491	0.656468	-3.95218
COA1	-0.0594508	6.40755	-1.96646	0.0506674	0.656468	-3.95245
FBXL5	0.0966607	10.0472	1.96631	0.0506843	0.656468	-3.9527
EN1	0.0794646	2.35507	1.96592	0.0507304	0.656603	-3.95337
SGSH	0.0994299	7.86914	1.96555	0.0507727	0.656603	-3.95398
CBX1	0.0953055	9.13024	1.96535	0.0507959	0.656603	-3.95432
HAPLN3	-0.148393	8.42487	-1.96517	0.0508177	0.656603	-3.95463
FBXO21	-0.0692071	7.39137	-1.96487	0.0508518	0.656646	-3.95513
RNASE7	0.0621723	2.64488	1.96389	0.050967	0.657736	-3.95679
IQCN	0.0802473	5.11978	1.96276	0.0510994	0.659047	-3.9587
EPB41L2	-0.0845397	5.63227	-1.96212	0.051174	0.659267	-3.95978
BATF2	0.226216	6.07775	1.96174	0.051219	0.659267	-3.96042
KIAA0319L	0.115149	7.77791	1.96172	0.0512215	0.659267	-3.96046
COX16	-0.108263	6.8524	-1.96156	0.05124	0.659267	-3.96072
GSTA4	-0.130352	4.72921	-1.96092	0.0513149	0.659833	-3.9618
KCNJ2	0.127279	10.8121	1.96041	0.0513753	0.659927	-3.96267
LOC105369957	-0.214905	4.70686	-1.96033	0.051384	0.659927	-3.96279
P4HB	0.0810863	7.88556	1.95924	0.0515123	0.661177	-3.96463
ETFBKMT	0.0821298	4.4346	1.95848	0.0516027	0.661777	-3.96592
PCID2	-0.123888	6.90777	-1.95803	0.0516558	0.661777	-3.96667
VEGFA	0.0686762	5.78797	1.958	0.0516598	0.661777	-3.96673
SCAND1	0.0894335	6.60403	1.95754	0.0517135	0.661777	-3.96749
H19	-0.198806	5.63088	-1.95638	0.0518509	0.661777	-3.96945
S1PR1	-0.108018	8.97702	-1.95579	0.0519208	0.661777	-3.97044
MMP24	0.0780497	6.29139	1.95559	0.0519447	0.661777	-3.97078
MANBA	0.0991073	9.37845	1.95548	0.0519584	0.661777	-3.97097
PREP	-0.0915145	6.70723	-1.95528	0.0519821	0.661777	-3.97131
ING5	0.0522738	5.15374	1.95517	0.0519949	0.661777	-3.97149
C17orf100	0.149355	4.65836	1.95513	0.0519993	0.661777	-3.97155
RBM6	-0.101457	9.67568	-1.95513	0.0519999	0.661777	-3.97156
HOXC13	-0.0928306	3.93292	-1.95434	0.0520931	0.661777	-3.97287
LOC105374336	-0.087992	4.511	-1.95412	0.0521194	0.661777	-3.97325
SS18	-0.0840576	6.17896	-1.9538	0.0521573	0.661777	-3.97378
PUM3	-0.0879853	6.07409	-1.95341	0.0522045	0.661777	-3.97444
SHKBP1	0.164539	9.51933	1.95313	0.0522376	0.661777	-3.97491
LHFPL1	-0.0951117	3.06776	-1.95306	0.0522462	0.661777	-3.97503
GGT1	0.0921358	6.04757	1.95295	0.052259	0.661777	-3.97521
ARPIN	0.120509	5.90824	1.9526	0.0523015	0.661777	-3.97581
MARK2	0.0765837	4.71222	1.95196	0.0523772	0.661777	-3.97687
LINC00566	0.106674	3.22496	1.95179	0.052398	0.661777	-3.97717
A2M	-0.0702237	4.65459	-1.95111	0.0524793	0.661777	-3.9783
EXOSC10	-0.077575	6.30587	-1.95082	0.0525137	0.661777	-3.97879
MBD3	0.0640514	6.35562	1.95079	0.0525182	0.661777	-3.97885
SLC22A4	0.156219	8.73104	1.95041	0.0525631	0.661777	-3.97948
CALR3	0.0713799	4.22279	1.95036	0.0525693	0.661777	-3.97956
MTOR	-0.0557169	5.01518	-1.95031	0.0525753	0.661777	-3.97965
MARK3	0.0846316	8.04137	1.95009	0.0526016	0.661777	-3.98002
ABHD3	0.236172	8.65746	1.94992	0.0526217	0.661777	-3.9803
TMEM42	-0.124917	6.67708	-1.94991	0.0526235	0.661777	-3.98032
RP9	-0.0913836	6.5122	-1.94966	0.0526532	0.661777	-3.98074
LOC105369889	0.133104	4.18716	1.9495	0.052672	0.661777	-3.981
KLHL3	-0.086962	4.99161	-1.94937	0.0526887	0.661777	-3.98123
CTSA	0.165211	9.95148	1.9492	0.0527092	0.661777	-3.98152
TUBA4B	0.0971342	6.36982	1.94893	0.0527414	0.661777	-3.98197
SEC23B	0.100466	8.05827	1.94892	0.0527426	0.661777	-3.98198
ZNF502	-0.122077	5.2806	-1.94876	0.0527611	0.661777	-3.98224
IL17RB	0.0684282	3.62656	1.94862	0.0527784	0.661777	-3.98248
XPO4	-0.0806344	6.84742	-1.9483	0.0528167	0.661777	-3.98301
TBRG1	-0.0622206	7.59493	-1.9482	0.0528294	0.661777	-3.98319
AP3M2	-0.112663	6.81176	-1.94716	0.052954	0.66269	-3.98492
CDC37P1	0.0825524	5.24283	1.94685	0.052992	0.66269	-3.98545
MLKL	0.139564	9.3516	1.94682	0.0529954	0.66269	-3.9855
MRPS22	-0.0608379	6.7708	-1.94638	0.0530492	0.662837	-3.98624
CFAP126	-0.0889372	4.32903	-1.94621	0.0530691	0.662837	-3.98652
HCLS1	0.0492833	12.1932	1.94569	0.0531322	0.663101	-3.98739
SPTB	0.10063	6.58297	1.94552	0.0531524	0.663101	-3.98767
FYN	-0.0882538	9.69297	-1.94511	0.0532022	0.663334	-3.98836
MYCBP2	-0.0690548	9.41487	-1.94462	0.0532613	0.663539	-3.98917
CBLB	-0.0980849	6.5153	-1.94446	0.0532807	0.663539	-3.98944
SNX3	0.0893413	9.91947	1.94363	0.0533817	0.664409	-3.99083
BPIFB1	0.0808645	4.37489	1.94248	0.0535216	0.665679	-3.99275
TMED4	-0.041492	6.29444	-1.94228	0.053546	0.665679	-3.99309
KNTC1	-0.138618	5.73854	-1.94175	0.0536111	0.665966	-3.99398
THNSL1	-0.158747	4.62606	-1.94158	0.0536315	0.665966	-3.99426
LMO2	0.0827301	6.7893	1.94118	0.0536807	0.665973	-3.99493
MKRN1	0.116795	11.6473	1.94107	0.0536944	0.665973	-3.99512
GBX2	0.0927636	4.70617	1.9405	0.0537641	0.666171	-3.99607
TRAF5	-0.0914288	5.99936	-1.94042	0.0537728	0.666171	-3.99619
KDM4B	0.0699396	7.55257	1.93967	0.0538656	0.666607	-3.99746
EXTL3	0.0729876	5.94481	1.93963	0.0538704	0.666607	-3.99752
TMEM44	0.0693817	4.77903	1.93937	0.0539024	0.666617	-3.99796
NIPA1	-0.087827	5.66399	-1.93825	0.0540399	0.667775	-3.99983
MRPL48	-0.13927	7.41044	-1.93809	0.0540586	0.667775	-4.00008
THRB	0.0918845	3.64687	1.9375	0.054131	0.668065	-4.00106
SYNE2	-0.0829969	6.26736	-1.93705	0.0541865	0.668065	-4.00182
NUP37	-0.0986652	5.35185	-1.93703	0.0541895	0.668065	-4.00186
ITPKB	-0.0519941	6.87246	-1.93689	0.0542072	0.668065	-4.0021
ZYX	0.134775	8.40617	1.93601	0.0543155	0.66847	-4.00356
CD63-AS1	0.0840162	5.9047	1.9359	0.0543288	0.66847	-4.00374
OTUD7A	-0.0885096	4.97465	-1.93586	0.054334	0.66847	-4.00381
LTBR	0.065065	5.29396	1.93493	0.0544482	0.66907	-4.00535
ANXA2R	-0.126726	8.46766	-1.93488	0.0544541	0.66907	-4.00543
SLC35E2A	-0.09498	8.22372	-1.93466	0.0544815	0.66907	-4.0058
MTFP1	-0.115898	6.89954	-1.93444	0.0545089	0.66907	-4.00617
PIBF1	-0.203316	5.23403	-1.93419	0.0545399	0.66907	-4.00659
CD1E	-0.0802658	3.25538	-1.93393	0.0545719	0.66907	-4.00702
LUNAR1	0.151222	5.95919	1.93369	0.054602	0.66907	-4.00742
KMO	-0.137801	6.91081	-1.93306	0.0546798	0.669548	-4.00846
LOC100288590	0.0620368	2.41787	1.93247	0.0547526	0.669548	-4.00944
PVALB	0.252512	5.11053	1.93238	0.0547649	0.669548	-4.0096
KRT10-AS1	-0.142479	7.72677	-1.93236	0.0547663	0.669548	-4.00962
CNTLN	0.0860315	3.48576	1.93154	0.0548689	0.669618	-4.011
TMEM218	-0.0719982	5.79665	-1.93118	0.0549132	0.669618	-4.01159
GABARAP	0.0528105	12.2733	1.93115	0.0549178	0.669618	-4.01165
UGP2	-0.0565026	8.98869	-1.93095	0.0549422	0.669618	-4.01197
CECR9	0.0651839	3.52978	1.93065	0.0549799	0.669618	-4.01248
OSR1	0.0827729	2.86859	1.93064	0.0549811	0.669618	-4.01249
HUS1B	0.0735176	4.66323	1.93045	0.0550039	0.669618	-4.0128
ITGB3BP	-0.16915	6.41253	-1.93017	0.0550388	0.669618	-4.01326
LIN9	-0.0718617	3.54628	-1.92968	0.0551007	0.669618	-4.01409
SLC49A4	0.116413	6.62272	1.92959	0.0551123	0.669618	-4.01424
EEF1AKMT1	-0.125504	5.68558	-1.92939	0.0551364	0.669618	-4.01456
GALK2	-0.0734739	6.81436	-1.9293	0.0551483	0.669618	-4.01472
CCM2L	0.0896361	2.98743	1.92856	0.0552406	0.670354	-4.01595
TEX47	0.0994014	2.93675	1.92831	0.0552718	0.670354	-4.01636
RSL24D1	-0.19564	6.60743	-1.92761	0.0553588	0.670546	-4.01751
TRH	0.0929818	2.64535	1.92726	0.0554038	0.670546	-4.01811
LILRA4	-0.177257	7.54436	-1.92712	0.0554205	0.670546	-4.01833
IRAK1BP1	-0.0908567	2.83451	-1.92697	0.05544	0.670546	-4.01859
PRSS55	0.0889028	3.41434	1.92693	0.0554445	0.670546	-4.01865
PCSK6	0.0652823	3.90022	1.92531	0.055648	0.672626	-4.02133
ENO2	-0.10873	8.76765	-1.92489	0.0557007	0.672667	-4.02202
ZNF672	0.0591017	5.76463	1.92471	0.0557234	0.672667	-4.02232
LIN7A	0.148272	6.32231	1.92454	0.0557459	0.672667	-4.02262
SLC39A11	0.0877644	8.61269	1.92421	0.0557868	0.67278	-4.02315
TRIM59	-0.161093	5.01296	-1.9233	0.0559021	0.673406	-4.02467
SH3RF3-AS1	0.0943757	2.41175	1.9232	0.0559149	0.673406	-4.02483
AMACR	-0.0741052	4.95501	-1.92294	0.055947	0.673406	-4.02526
BTLA	-0.168948	6.79917	-1.9228	0.0559648	0.673406	-4.02549
FGGY	0.0622516	3.46268	1.92212	0.0560507	0.673518	-4.02661
TAF4	0.0785666	6.77564	1.92199	0.056067	0.673518	-4.02682
ZNF226	-0.0562054	4.30819	-1.92198	0.0560687	0.673518	-4.02685
LOC100507443	0.0945408	3.28034	1.92105	0.056187	0.674531	-4.02839
CFAP52	0.0607322	3.48347	1.92082	0.0562162	0.674531	-4.02877
SLC35F2	-0.131396	7.45527	-1.92034	0.0562768	0.674879	-4.02956
GMIP	0.106408	7.04843	1.91957	0.0563741	0.675542	-4.03082
SEMA6A	-0.0627531	5.08954	-1.91877	0.0564761	0.675542	-4.03215
DCTN4	0.0975937	6.30201	1.91875	0.0564788	0.675542	-4.03218
CEP104	-0.0787779	7.00244	-1.91863	0.0564939	0.675542	-4.03238
KIF13A	0.0868002	7.63509	1.91862	0.056496	0.675542	-4.0324
TTLL7	0.0763989	2.96285	1.91841	0.0565218	0.675542	-4.03274
C1orf115	0.0794918	3.99733	1.9166	0.0567541	0.676572	-4.03574
GON7	-0.135358	4.10188	-1.91591	0.0568419	0.676572	-4.03687
GNA15	0.173977	6.31097	1.9158	0.0568558	0.676572	-4.03705
LEMD2	0.111714	4.53262	1.91563	0.0568783	0.676572	-4.03734
CPLX2	0.0644772	4.41357	1.91551	0.0568936	0.676572	-4.03754
RNASE6	0.112118	10.6882	1.91545	0.0569011	0.676572	-4.03763
RTN3	0.0578535	11.9766	1.91541	0.0569062	0.676572	-4.0377
RTEL1-TNFRSF6B	0.0877633	5.13237	1.91532	0.056918	0.676572	-4.03785
UBALD2	0.0821397	8.33508	1.91517	0.0569368	0.676572	-4.03809
OR51J1	0.0898188	3.25311	1.91493	0.0569677	0.676572	-4.03849
FLVCR2	0.0964897	5.44771	1.91477	0.0569889	0.676572	-4.03876
NUS1P3	-0.0877369	3.41416	-1.91458	0.0570132	0.676572	-4.03907
PGLYRP4	0.0786976	3.45529	1.91445	0.0570293	0.676572	-4.03928
GPHB5	0.0775674	4.37672	1.91362	0.0571356	0.676572	-4.04064
B3GNT6	0.0689635	5.00719	1.91294	0.0572232	0.676572	-4.04176
CABLES1	0.0662775	4.29651	1.91276	0.0572473	0.676572	-4.04207
MYLK4	0.0969227	3.65531	1.91266	0.0572599	0.676572	-4.04223
TMEM161B-DT	-0.0694398	5.838	-1.91255	0.057274	0.676572	-4.04241
PRSS27	0.075522	3.30829	1.91229	0.0573075	0.676572	-4.04284
RPS15A	-0.0943335	8.31383	-1.91217	0.0573236	0.676572	-4.04304
PTGES2	0.0694292	6.81337	1.91216	0.0573248	0.676572	-4.04306
PRMT2	-0.0866511	7.02218	-1.91208	0.0573343	0.676572	-4.04318
MED14OS	0.087423	3.51188	1.91195	0.0573512	0.676572	-4.0434
CTBS	0.16447	7.98451	1.91182	0.0573683	0.676572	-4.04361
ADIRF	0.0927593	4.68151	1.91143	0.0574184	0.67679	-4.04425
PARP15	-0.156448	5.49184	-1.91101	0.0574723	0.67705	-4.04494
PLD2	0.0800583	5.64826	1.91019	0.0575784	0.677927	-4.04629
GRB14	0.159079	3.51508	1.90963	0.0576513	0.678075	-4.04721
NRAV	-0.0813495	4.83201	-1.90952	0.0576659	0.678075	-4.0474
DEAF1	0.0622403	4.29133	1.90897	0.057737	0.678075	-4.0483
MDK	0.0818581	5.20998	1.9087	0.0577728	0.678075	-4.04875
SECTM1	0.123976	9.5196	1.9085	0.0577987	0.678075	-4.04908
IL31RA	0.0645067	3.17843	1.90797	0.0578669	0.678075	-4.04994
MX2	0.0962525	10.5302	1.90794	0.0578707	0.678075	-4.04999
TMEM170A	-0.0789492	7.14723	-1.90766	0.0579068	0.678075	-4.05044
TAF8	0.0548484	5.99435	1.90726	0.0579597	0.678075	-4.05111
TNFRSF1A	0.0729003	10.7989	1.90721	0.0579657	0.678075	-4.05119
RNF185-AS1	-0.089843	3.8645	-1.90666	0.0580377	0.678075	-4.05209
BPGM	0.314143	7.8783	1.90661	0.0580445	0.678075	-4.05218
MCAM	0.049112	4.55023	1.90661	0.0580446	0.678075	-4.05218
MICOS10	-0.077133	7.63094	-1.90661	0.0580446	0.678075	-4.05218
SNORD8	-0.169133	4.88118	-1.90587	0.0581411	0.678075	-4.0534
EPHX4	-0.127492	3.3001	-1.90558	0.0581787	0.678075	-4.05387
DUSP13B	0.0828417	4.37558	1.90555	0.0581832	0.678075	-4.05392
SMPDL3A	0.0966438	4.35515	1.90549	0.05819	0.678075	-4.05401
PDGFC	0.137065	4.33215	1.90523	0.0582248	0.678075	-4.05445
TAFA1	-0.233312	4.33904	-1.9048	0.0582802	0.678075	-4.05514
TMCC3	0.129447	8.89059	1.90471	0.058293	0.678075	-4.0553
RFPL2	0.110719	4.98055	1.90464	0.0583016	0.678075	-4.05541
HLA-DQB1	-0.202071	7.64065	-1.9043	0.0583461	0.678075	-4.05597
TECPR2	0.159921	7.72444	1.90416	0.0583646	0.678075	-4.0562
WNT3	0.0653347	4.23504	1.90401	0.0583847	0.678075	-4.05645
SIGLECL1	0.0891755	2.25882	1.90353	0.058447	0.67843	-4.05723
GPR84	0.228576	4.92033	1.90309	0.058505	0.678592	-4.05795
UBXN2B	0.0918305	8.21244	1.90283	0.0585386	0.678592	-4.05837
LOC101928012	0.0710839	1.8782	1.90234	0.0586029	0.678592	-4.05918
RPL8	-0.101975	11.8832	-1.90226	0.0586141	0.678592	-4.05931
HAPLN2	0.0837358	4.48619	1.90221	0.0586198	0.678592	-4.05938
WNT10A	0.0794711	4.4503	1.90092	0.0587899	0.679949	-4.0615
UBE2J2	0.0519455	6.53455	1.90084	0.0588008	0.679949	-4.06164
TXLNG	-0.0935963	6.38036	-1.89968	0.0589534	0.68037	-4.06353
DCAF7	-0.0648632	7.38793	-1.89961	0.0589633	0.68037	-4.06365
HK1	0.120373	9.18487	1.89943	0.0589872	0.68037	-4.06395
SEL1L3	-0.0976736	6.7896	-1.89937	0.0589948	0.68037	-4.06404
SLC7A7	0.0822157	10.8431	1.89929	0.0590056	0.68037	-4.06417
KLK14	0.0902558	4.13384	1.89879	0.0590714	0.68037	-4.06499
ALDH3A2	-0.0731938	6.59105	-1.89872	0.0590805	0.68037	-4.0651
PEX11A	-0.0813796	4.61981	-1.89852	0.0591072	0.68037	-4.06543
SH3PXD2B	0.0781291	4.37994	1.89816	0.059155	0.68037	-4.06602
LOC100130964	0.0812631	2.36073	1.89771	0.059214	0.68037	-4.06675
HSP90B1	-0.0695769	8.84978	-1.89757	0.0592326	0.68037	-4.06698
CDYL2	-0.0770093	5.50963	-1.89738	0.0592589	0.68037	-4.0673
TBC1D14	0.106324	9.94438	1.89723	0.0592781	0.68037	-4.06754
ACE	0.0665499	4.31526	1.89719	0.0592831	0.68037	-4.0676
HTR4	0.0640394	3.72991	1.89653	0.0593706	0.681008	-4.06868
TADA2A	-0.0806019	5.18772	-1.89621	0.0594143	0.681144	-4.06921
CRYBB3	0.0815672	5.24582	1.89595	0.0594488	0.681173	-4.06964
SH2D6	0.0920659	4.17517	1.89528	0.0595373	0.681233	-4.07072
SMAD1	0.133644	5.95029	1.89484	0.0595959	0.681233	-4.07144
TMEM147-AS1	-0.0649228	7.08657	-1.89465	0.0596208	0.681233	-4.07174
SV2B	0.062988	3.55443	1.89459	0.0596293	0.681233	-4.07185
HOXD3	0.0573013	2.75689	1.89446	0.0596471	0.681233	-4.07207
LINC00312	0.0852847	3.51212	1.89415	0.0596884	0.681233	-4.07257
CSF2	0.0576508	4.04744	1.89395	0.059715	0.681233	-4.0729
NUP210	-0.0770794	8.41784	-1.89335	0.0597954	0.681233	-4.07388
JAK1	-0.0955944	9.09418	-1.89328	0.0598042	0.681233	-4.07398
FOXC2	0.0808192	3.30096	1.89312	0.0598255	0.681233	-4.07424
ARHGAP8	0.0781491	4.14047	1.89203	0.0599722	0.681233	-4.07603
MAP2K1	0.102911	9.51545	1.89034	0.0601991	0.681233	-4.07878
ADPRM	-0.105938	6.40024	-1.89026	0.0602099	0.681233	-4.07891
ATP2C2	0.054268	4.59855	1.88999	0.0602459	0.681233	-4.07935
LOC100506489	0.0884741	2.89465	1.88911	0.0603645	0.681233	-4.08078
RCOR1	0.0750921	7.21607	1.88911	0.0603645	0.681233	-4.08078
TTC17	-0.0705697	6.14652	-1.88871	0.0604185	0.681233	-4.08144
LRPPRC	-0.0933839	7.51002	-1.88847	0.0604502	0.681233	-4.08182
AGAP2	0.0583305	5.99253	1.88824	0.0604809	0.681233	-4.08219
GRAMD4	0.0741401	5.66236	1.88817	0.0604912	0.681233	-4.08231
SNED1	-0.0700932	4.63604	-1.88801	0.060512	0.681233	-4.08256
ZNF814	-0.0788515	6.60583	-1.88784	0.0605356	0.681233	-4.08285
SLC1A5	0.125195	5.78258	1.88782	0.0605376	0.681233	-4.08287
NPM3	-0.085403	7.13403	-1.88777	0.0605448	0.681233	-4.08296
MAPK3	0.106132	7.9208	1.88765	0.0605617	0.681233	-4.08316
C10orf95-AS1	-0.105688	9.20487	-1.88762	0.0605658	0.681233	-4.08321
LINC01350	0.092954	3.54999	1.88737	0.0605986	0.681233	-4.08361
AP3S2	0.0835328	7.42549	1.88724	0.0606164	0.681233	-4.08382
NPL	0.0979718	8.92727	1.88693	0.0606585	0.681233	-4.08433
LINC02402	-0.0925222	2.52067	-1.88663	0.0606989	0.681233	-4.08481
ORAI3	0.0714324	10.4731	1.88627	0.060748	0.681233	-4.0854
KIF11	-0.195328	5.61291	-1.8862	0.0607578	0.681233	-4.08552
FAM90A1	0.088629	4.60465	1.88593	0.0607939	0.681233	-4.08595
TMCO2	-0.108851	2.82784	-1.88536	0.0608712	0.681233	-4.08688
MFSD6	-0.110189	7.29791	-1.88523	0.0608889	0.681233	-4.08709
TRIM31	0.0726059	4.65522	1.88502	0.0609172	0.681233	-4.08743
GNG11	0.131245	5.91823	1.88487	0.0609371	0.681233	-4.08766
GON4L	-0.0585231	7.19074	-1.8848	0.0609469	0.681233	-4.08778
PP12613	0.0799839	3.55118	1.88479	0.0609482	0.681233	-4.0878
KASH5	0.0707857	2.0925	1.88477	0.0609507	0.681233	-4.08783
TLR5	0.143057	8.23654	1.88463	0.0609704	0.681233	-4.08806
NCKAP5L	0.0658387	4.43343	1.88463	0.0609708	0.681233	-4.08807
ASB7	0.0929487	7.596	1.88428	0.0610184	0.681233	-4.08864
DAB1-AS1	-0.0739195	2.7248	-1.88424	0.0610236	0.681233	-4.0887
AKR1B1	-0.0890232	9.68525	-1.88423	0.0610242	0.681233	-4.08871
GJB5	0.0831344	3.5972	1.88357	0.0611142	0.681233	-4.08978
KANK2	0.0947175	5.36537	1.88357	0.0611149	0.681233	-4.08979
MYB	0.0816901	5.29843	1.88318	0.0611677	0.681233	-4.09042
AGRN	0.059785	5.63617	1.88303	0.0611876	0.681233	-4.09065
C1orf198	0.115246	6.33233	1.88301	0.0611904	0.681233	-4.09069
CD247	-0.157223	8.39014	-1.88299	0.0611929	0.681233	-4.09072
RALGAPA2	0.0657448	6.68492	1.8827	0.0612336	0.681233	-4.0912
TRAM2	-0.0546353	6.39448	-1.88265	0.0612392	0.681233	-4.09127
MIR4435-2HG	0.131439	4.1262	1.88234	0.061282	0.681233	-4.09177
DHRS12	0.108915	7.83445	1.88222	0.0612986	0.681233	-4.09197
MRPS30	-0.0981525	6.4819	-1.88202	0.0613259	0.681233	-4.0923
MCOLN2	-0.0930126	5.49616	-1.88201	0.0613277	0.681233	-4.09232
PIK3C2A	-0.0567682	4.68556	-1.882	0.0613282	0.681233	-4.09232
FAM174A	0.161678	5.70737	1.88172	0.0613664	0.681233	-4.09278
CNOT4	-0.0597921	5.52	-1.88164	0.061377	0.681233	-4.0929
PRR11	0.067561	8.07522	1.88143	0.0614065	0.681233	-4.09325
CCDC71L	0.0723101	5.33529	1.88125	0.0614316	0.681233	-4.09355
ACTL9	0.0671356	2.95338	1.87942	0.0616822	0.681516	-4.09651
SNRPD3	-0.0777507	9.97069	-1.87932	0.0616948	0.681516	-4.09666
AGPAT4-IT1	-0.122288	6.0528	-1.87921	0.0617111	0.681516	-4.09686
ADISSP	0.106417	6.66393	1.8792	0.061712	0.681516	-4.09687
LOC105376204	0.0749431	2.78971	1.87912	0.0617228	0.681516	-4.09699
PCBP3	0.110243	5.87262	1.87881	0.0617654	0.681516	-4.0975
ABR	0.0656584	5.94785	1.87871	0.0617797	0.681516	-4.09766
VPS50	-0.091067	5.20486	-1.87823	0.0618446	0.681516	-4.09843
MROH7	0.100623	3.57135	1.87814	0.0618577	0.681516	-4.09858
TAF15	-0.0653366	8.47635	-1.87761	0.0619301	0.681516	-4.09943
LOC101928988	0.176732	6.73566	1.87751	0.0619442	0.681516	-4.0996
LINC00445	0.129265	3.79925	1.87675	0.0620492	0.681516	-4.10083
CBFA2T2	-0.0500647	6.54126	-1.87642	0.0620937	0.681516	-4.10135
PYGL	0.124236	11.0243	1.87613	0.062134	0.681516	-4.10183
GATA6	-0.0792418	3.62265	-1.87601	0.0621512	0.681516	-4.10203
AKAP1	-0.0505948	5.24786	-1.87546	0.0622273	0.681516	-4.10292
NIBAN3	-0.0997717	7.42904	-1.87542	0.062232	0.681516	-4.10297
CUEDC1	0.0753259	5.16436	1.87541	0.0622343	0.681516	-4.103
PRKAR2B	0.220711	7.41567	1.87535	0.0622428	0.681516	-4.1031
STIL	-0.146313	5.06673	-1.87528	0.0622517	0.681516	-4.1032
UTS2	-0.218346	3.4983	-1.87497	0.0622949	0.681516	-4.10371
CCL28	-0.0963699	6.7948	-1.87465	0.0623388	0.681516	-4.10422
ZIC4	0.0661925	3.15525	1.87463	0.0623412	0.681516	-4.10425
PTGDR	-0.15111	7.89365	-1.8744	0.0623741	0.681516	-4.10463
TRAPPC4	-0.0733738	7.88846	-1.87403	0.0624244	0.681516	-4.10522
PMS2P3	-0.080304	6.90832	-1.87395	0.0624365	0.681516	-4.10536
ALDH4A1	0.0698263	5.75015	1.87355	0.0624915	0.681516	-4.106
SAPCD2	0.0774499	5.44971	1.87311	0.0625522	0.681516	-4.10671
LINC01700	0.100589	3.26908	1.87308	0.0625568	0.681516	-4.10676
ASB16-AS1	-0.0899196	6.5755	-1.8729	0.062582	0.681516	-4.10705
CTBP1-AS	-0.122741	4.92948	-1.87281	0.0625944	0.681516	-4.1072
SDC3	0.076856	4.88321	1.87279	0.0625969	0.681516	-4.10723
B4GALNT3	0.0737095	4.61036	1.87269	0.0626104	0.681516	-4.10738
SNHG29	-0.0776904	7.24268	-1.87258	0.0626259	0.681516	-4.10756
SNHG14	-0.0932446	4.7229	-1.87255	0.0626306	0.681516	-4.10762
FZD9	0.0826971	4.59783	1.87253	0.062633	0.681516	-4.10765
CDH23	0.0622615	5.04216	1.8725	0.0626377	0.681516	-4.1077
IQGAP3	0.0804402	2.87664	1.87194	0.0627147	0.682007	-4.10859
LOC101927268	-0.176462	5.53236	-1.8716	0.0627623	0.682177	-4.10914
IRGC	0.0730229	4.30025	1.87133	0.0627997	0.682236	-4.10958
VIL1	0.0665416	4.17884	1.87041	0.0629285	0.682686	-4.11107
ZNF280B	-0.0817543	4.3967	-1.8703	0.0629429	0.682686	-4.11123
GINS2	0.0570286	4.52453	1.87013	0.0629675	0.682686	-4.11152
BEST2	0.0878759	3.62829	1.87004	0.0629795	0.682686	-4.11166
GOLGA3	-0.0494847	6.82968	-1.86989	0.0630009	0.682686	-4.1119
BPIFB2	0.0805109	3.79614	1.86909	0.063113	0.683431	-4.1132
TNNT2	0.0666497	4.42433	1.86849	0.0631958	0.683431	-4.11415
TMEM119	0.141595	3.31893	1.86844	0.0632033	0.683431	-4.11423
KLF2	-0.105381	8.80658	-1.86843	0.0632049	0.683431	-4.11425
PDCD2L	-0.126645	6.23083	-1.86794	0.063274	0.683431	-4.11505
DPP9	0.0530315	5.704	1.8679	0.0632787	0.683431	-4.1151
ETS2	0.0909508	7.9807	1.86772	0.0633049	0.683431	-4.1154
PPP3CC	-0.0737412	6.57393	-1.86745	0.0633421	0.683431	-4.11583
SLC7A6OS	-0.0977013	7.87885	-1.86734	0.0633577	0.683431	-4.11601
PTCD3	-0.117158	7.11306	-1.86637	0.0634938	0.684513	-4.11757
CLEC2B	-0.0906504	8.89384	-1.86617	0.063522	0.684513	-4.11789
HIP1R	-0.0842157	6.82169	-1.86577	0.0635788	0.684779	-4.11854
MTA3	-0.0963462	4.66369	-1.86543	0.0636264	0.684946	-4.11908
MEF2C-AS1	0.0906314	4.24665	1.86513	0.0636684	0.685053	-4.11956
RAX	0.0871888	4.27596	1.86465	0.0637361	0.685127	-4.12033
LINS1	-0.096705	7.35516	-1.86463	0.0637394	0.685127	-4.12037
SPATA2	0.0651737	7.72176	1.86424	0.0637935	0.68532	-4.12099
NACA2	0.0967811	4.19696	1.86383	0.0638518	0.68532	-4.12165
COL17A1	0.0777037	4.56079	1.86362	0.0638815	0.68532	-4.12199
GPRC5C	0.0768687	4.566	1.86359	0.0638857	0.68532	-4.12204
RBMS3-AS3	0.073987	2.11285	1.86296	0.063974	0.685822	-4.12304
CACNG4	0.0602821	4.51554	1.86273	0.0640066	0.685822	-4.12341
DDN	0.0799108	4.8414	1.86245	0.0640468	0.685822	-4.12387
RBM19	-0.0754113	5.88742	-1.86233	0.0640641	0.685822	-4.12406
LINC01887	0.166348	4.16967	1.86212	0.0640931	0.685822	-4.12439
STRBP	-0.115882	6.69147	-1.86087	0.0642704	0.687186	-4.1264
APPL1	-0.114895	7.23922	-1.86076	0.0642863	0.687186	-4.12658
FLT3	0.128434	4.72522	1.8604	0.0643368	0.687186	-4.12715
[truncated: 19,359 more rows]
