# Supplementary material
Source: Research Square preprint supplement (doi:10.21203/rs.3.rs-8976053/v1)
Supplement: Supplementary file 11 [file 91224ed9fe7c728b2ff0006c.xlsx]

## Sheet: All_DEGs
gene	baseMean	log2FoldChange	lfcSE	stat	pvalue	padj
A1BG	1.29046	-1.03622	1.16142	-0.892205	0.372283
A1CF	0.485958	-1.65702	1.57059	-1.05503	0.29141
A2M	30.6985	0.000791844	0.407125	0.00194496	0.998448	0.999995
A2ML1	0.985758	0.282315	1.23415	0.228752	0.819061
A3GALT2	2.322	-0.569573	0.997234	-0.571153	0.567896
A4GALT	0.307991	0.30194	2.87138	0.105155	0.916253
A4GNT	0.0842727	0.879007	3.14975	0.279072	0.78019
AAAS	211.408	-0.106603	0.174674	-0.610296	0.541666	0.999995
AACS	55.9546	-0.278936	0.271658	-1.02679	0.304519	0.999995
AADAC	0.153393	0.301937	3.14975	0.0958607	0.923631
AADACL2	0.0854785	0.879007	3.14975	0.279072	0.78019
AADACL3	0
AADACL4	0
AADAT	0.161351	-1.09611	3.12464	-0.350794	0.725743
AAGAB	597.225	0.0816958	0.245188	0.333197	0.738986	0.999995
AAK1	1293.52	-0.210672	0.181592	-1.16014	0.245993	0.999995
AAMDC	7.26811	0.383188	0.508768	0.753168	0.451349
AAMP	489.135	-0.0398411	0.133472	-0.298499	0.765322	0.999995
AANAT	3.51558	1.97914	0.78574	2.51882	0.0117748
AAR2	286.943	0.00418425	0.140454	0.0297908	0.976234	0.999995
AARD	0.493086	-0.0126034	1.66839	-0.00755424	0.993973
AARS1	282.999	-0.24888	0.24545	-1.01398	0.310594	0.999995
AARS2	65.2095	-0.167043	0.283749	-0.588699	0.556063	0.999995
AARSD1	10.0227	-0.203461	0.402359	-0.50567	0.613088	0.999995
AASDH	291.63	0.121681	0.158014	0.770069	0.441259	0.999995
AASDHPPT	673.773	0.149558	0.180253	0.82971	0.406703	0.999995
AASS	90.3686	0.427286	0.273329	1.56327	0.117989	0.999995
AATF	681.34	-0.0348887	0.133765	-0.26082	0.794231	0.999995
AATK	284.393	-0.158491	0.228342	-0.694094	0.487623	0.999995
ABAT	359.327	0.102508	0.242099	0.423415	0.671992	0.999995
ABCA1	1102.72	0.561001	0.316378	1.7732	0.076196	0.999995
ABCA10	23.1016	-0.136952	0.343919	-0.39821	0.690475	0.999995
ABCA12	0.452513	1.5698	1.88879	0.831113	0.40591
ABCA13	31.669	0.0533683	0.570401	0.0935627	0.925457	0.999995
ABCA2	262.584	-0.28665	0.28645	-1.0007	0.316974	0.999995
ABCA3	22.6097	0.179133	0.292885	0.611616	0.540792	0.999995
ABCA4	0.66604	0.152824	1.60892	0.0949857	0.924326
ABCA5	692.727	-0.293976	0.210818	-1.39445	0.163182	0.999995
ABCA6	15.3376	-0.0532882	0.364592	-0.146158	0.883796	0.999995
ABCA7	701.345	0.0721289	0.191431	0.376788	0.706331	0.999995
ABCA8	0.192489	-0.219402	3.14245	-0.0698189	0.944338
ABCA9	6.09083	0.281154	0.638145	0.44058	0.659517
ABCB1	440.86	-0.140352	0.221379	-0.633989	0.526088	0.999995
ABCB10	383.549	0.082152	0.18992	0.432561	0.665333	0.999995
ABCB11	2.77547	-0.589499	0.726227	-0.811728	0.416947
ABCB4	53.0992	0.251341	0.386139	0.650908	0.515106	0.999995
ABCB5	0.54954	0.782836	2.70781	0.289103	0.772502
ABCB6	0.684837	-0.156266	1.56593	-0.0997912	0.92051
ABCB7	409.06	0.152747	0.192919	0.791768	0.428496	0.999995
ABCB8	91.2392	-0.192219	0.278985	-0.688993	0.490828	0.999995
ABCB9	9.73296	-0.363928	0.403457	-0.902024	0.367044	0.999995
ABCC1	313.05	-0.19983	0.227398	-0.87877	0.379526	0.999995
ABCC10	105.378	-0.215619	0.247418	-0.871475	0.383495	0.999995
ABCC11	0.893614	-1.37369	1.33684	-1.02756	0.304155
ABCC12	0
ABCC2	72.5056	-0.0249649	0.228152	-0.109422	0.912867	0.999995
ABCC3	150.264	0.152477	0.479283	0.318134	0.750383	0.999995
ABCC4	281.93	0.808222	0.449257	1.79902	0.0720159	0.999995
ABCC5	755.255	0.015577	0.208184	0.0748233	0.940355	0.999995
ABCC6	118.404	-0.0767402	0.214543	-0.357692	0.720574	0.999995
ABCC8	0.0599736	-0.178956	3.14975	-0.0568159	0.954692
ABCC9	0.394352	-2.00827	2.78958	-0.719918	0.471575
ABCD1	81.4152	0.0722204	0.340744	0.211949	0.832147	0.999995
ABCD2	410.899	-0.0401337	0.253736	-0.158171	0.874322	0.999995
ABCD3	562.052	-0.0343362	0.121903	-0.281669	0.778198	0.999995
ABCD4	192.133	-0.106387	0.190964	-0.557102	0.577458	0.999995
ABCE1	906.315	0.156254	0.233151	0.670185	0.50274	0.999995
ABCF1	399.187	-0.187203	0.242412	-0.772249	0.439967	0.999995
ABCF2	47.6794	-0.0617394	0.248976	-0.247973	0.804155	0.999995
ABCF2-H2BK1	0
ABCF3	278.737	-0.118791	0.22559	-0.526576	0.598488	0.999995
ABCG1	235.333	0.216472	0.284196	0.761701	0.446239	0.999995
ABCG2	22.9968	1.126	0.43708	2.5762	0.00998937	0.534731
ABCG4	0
ABCG5	0.61396	0.867225	2.19762	0.39462	0.693124
ABCG8	0.515453	-0.971232	1.85233	-0.52433	0.600049
ABHD1	5.14589	-0.572271	0.60229	-0.950157	0.342032
ABHD10	581.586	0.0620625	0.152099	0.40804	0.683245	0.999995
ABHD11	40.8373	0.217861	0.264208	0.824584	0.409608	0.999995
ABHD12	117.04	-0.00254481	0.248536	-0.0102392	0.99183	0.999995
ABHD12B	65.4369	0.33595	0.349485	0.961271	0.336416	0.999995
ABHD13	1104.91	0.180114	0.288338	0.62466	0.532194	0.999995
ABHD14A	10.2619	-0.291029	0.458095	-0.635303	0.525231	0.999995
ABHD14A-ACY1	0.137202	-0.178956	3.14975	-0.0568159	0.954692
ABHD14B	262.698	-0.122631	0.159357	-0.769535	0.441575	0.999995
ABHD15	107.071	-0.159039	0.229524	-0.692908	0.488367	0.999995
ABHD16A	16.9153	-0.140581	0.306779	-0.45825	0.646773	0.999995
ABHD16B	0
ABHD17A	666.986	-0.371468	0.189691	-1.95828	0.0501971	0.942798
ABHD17B	296.944	-0.0399799	0.118913	-0.336212	0.736711	0.999995
ABHD17C	24.0418	-0.296902	0.411733	-0.721105	0.470845	0.999995
ABHD18	418.501	-0.0410092	0.146154	-0.280589	0.779025	0.999995
ABHD2	3212.16	-0.188022	0.224108	-0.838981	0.40148	0.999995
ABHD3	1664.43	0.329784	0.183078	1.80133	0.071651	0.999995
ABHD4	289.234	-0.00717716	0.22445	-0.0319766	0.974491	0.999995
ABHD5	2105.44	0.0932534	0.413354	0.225602	0.821511	0.999995
ABHD6	72.7538	-0.271492	0.209134	-1.29817	0.194228	0.999995
ABHD8	24.8438	-0.293818	0.270662	-1.08555	0.277678	0.999995
ABI1	2708.9	0.0818163	0.213137	0.383866	0.701077	0.999995
ABI2	254.696	-0.0203672	0.157618	-0.129218	0.897185	0.999995
ABI3	242.801	-0.298863	0.328729	-0.909147	0.363273	0.999995
ABI3BP	9.98719	0.390401	0.389643	1.00194	0.31637	0.999995
ABITRAM	255.865	0.089857	0.202153	0.444499	0.656682	0.999995
ABL1	100.008	-0.270819	0.356367	-0.759945	0.447288	0.999995
ABL2	271.138	0.0972402	0.162058	0.600033	0.548484	0.999995
ABLIM1	2098.7	-0.210817	0.21841	-0.965238	0.334426	0.999995
ABLIM2	2.1097	-0.768545	0.819548	-0.937767	0.348364
ABLIM3	74.2552	0.548932	0.582002	0.943179	0.345589	0.999995
ABO	37.6116	-0.334567	0.537362	-0.622609	0.533541	0.999995
ABR	604.209	-0.0482954	0.175245	-0.275588	0.782864	0.999995
ABRA	1.48839	0.309278	1.26779	0.243951	0.807269
ABRACL	949.872	0.116854	0.329641	0.35449	0.722972	0.999995
ABRAXAS1	225.284	0.118952	0.209996	0.56645	0.571088	0.999995
ABRAXAS2	501.59	0.152685	0.272748	0.559803	0.575614	0.999995
ABT1	438.6	-0.114205	0.231989	-0.492288	0.622516	0.999995
ABTB1	2802.2	-0.154213	0.250177	-0.616414	0.537621	0.999995
ABTB2	24.5858	0.0696084	0.284372	0.24478	0.806627	0.999995
ABTB3	116.979	-0.32606	0.261991	-1.24455	0.213298	0.999995
ACAA1	605.812	-0.042292	0.16137	-0.262082	0.793259	0.999995
ACAA2	301.658	-0.132126	0.160074	-0.825407	0.409141	0.999995
ACACA	129.821	-0.216131	0.388686	-0.556056	0.578172	0.999995
ACACB	63.612	-0.227626	0.268728	-0.847051	0.396967	0.999995
ACAD10	164.911	-0.0927698	0.225857	-0.410745	0.68126	0.999995
ACAD11	1.8084	-1.20467	1.20888	-0.996521	0.318997
ACAD8	339.163	-0.156711	0.167235	-0.937067	0.348724	0.999995
ACAD9	179.352	0.0168969	0.156657	0.107859	0.914107	0.999995
ACADL	0.518193	-0.304059	1.69808	-0.17906	0.85789
ACADM	657.568	0.0127297	0.207377	0.0613845	0.951053	0.999995
ACADS	49.4239	-0.247685	0.227821	-1.08719	0.276951	0.999995
ACADSB	463.953	-0.250151	0.168907	-1.481	0.138606	0.999995
ACADVL	710.219	-0.294097	0.118334	-2.4853	0.0129441	0.583908
ACAN	0.226726	0.782837	2.5724	0.304322	0.760883
ACAP1	1079.01	-0.107677	0.186577	-0.57712	0.563858	0.999995
ACAP2	5848	0.247125	0.182282	1.35573	0.175186	0.999995
ACAP3	122.648	-0.0192957	0.256438	-0.075245	0.94002	0.999995
ACAT1	185.784	0.188204	0.258078	0.729253	0.465847	0.999995
ACAT2	125.027	-0.0850799	0.292151	-0.291219	0.770884	0.999995
ACBD3	654.412	0.0830051	0.16812	0.493724	0.621501	0.999995
ACBD4	57.1432	0.102539	0.290528	0.352941	0.724133	0.999995
ACBD5	696.38	0.0634129	0.107823	0.588122	0.55645	0.999995
ACBD6	202.316	-0.257272	0.144042	-1.7861	0.0740836	0.999995
ACBD7	2.334	-0.95167	0.867822	-1.09662	0.272808
ACCS	199.862	-0.757947	0.40575	-1.86802	0.0617599	0.989512
ACCSL	0.942981	1.59769	1.64318	0.972316	0.330893
ACD	67.5011	-0.404302	0.215409	-1.8769	0.0605315	0.986364
ACE	3.26283	-0.186563	0.670876	-0.278089	0.780944
ACE2	1.43746	-1.05401	1.15714	-0.910873	0.362362
ACER1	3.32068	-0.081847	0.834874	-0.0980352	0.921904
ACER2	18.4998	-0.0722421	0.374127	-0.193095	0.846885	0.999995
ACER3	589.049	0.148324	0.123854	1.19757	0.231085	0.999995
ACHE	1.59228	1.83287	1.25097	1.46516	0.142878
ACIN1	2155.47	-0.0274218	0.223597	-0.122639	0.902393	0.999995
ACKR1	9.49374	0.751822	0.598973	1.25518	0.209412	0.999995
ACKR2	4.68579	0.621419	0.595517	1.04349	0.296719
ACKR3	52.6532	0.0294997	0.216458	0.136283	0.891597	0.999995
ACKR4	9.93731	-0.264571	0.406104	-0.651485	0.514733	0.999995
ACLY	631.785	-0.161308	0.22763	-0.708638	0.478549	0.999995
ACMSD	8.20883	-0.130398	0.440063	-0.296317	0.766988	0.999995
ACO1	459.946	1.0055	0.427727	2.35079	0.0187335	0.674571
ACO2	264.904	-0.202139	0.22528	-0.897279	0.36957	0.999995
ACOD1	1.94092	-0.452452	0.883212	-0.51228	0.608455
ACOT1	1.87694	0.226834	0.931137	0.24361	0.807533
ACOT11	4.7276	-0.250754	0.604693	-0.414681	0.678376
ACOT12	0.417664	-0.292588	1.72992	-0.169134	0.865691
ACOT13	227.866	0.00978335	0.178202	0.0549003	0.956218	0.999995
ACOT2	42.9446	-0.479955	0.237057	-2.02464	0.0429046	0.900618
ACOT4	0.32084	1.25402	2.39987	0.522536	0.601297
ACOT6	0.107568	-0.704479	3.14224	-0.224197	0.822604
ACOT7	24.2886	-0.00672308	0.326425	-0.0205961	0.983568	0.999995
ACOT8	118.868	-0.0188848	0.216158	-0.0873658	0.930381	0.999995
ACOT9	776.294	0.387664	0.153264	2.52938	0.0114263	0.549903
ACOX1	2311.71	0.150271	0.290595	0.517115	0.605076	0.999995
ACOX2	2.71604	-0.153175	0.699571	-0.218956	0.826684
ACOX3	58.7739	-0.164883	0.280073	-0.588714	0.556053	0.999995
ACOXL	9.79131	-0.128544	0.4394	-0.292544	0.769871	0.999995
ACP1	1125.49	0.189524	0.317099	0.597681	0.550053	0.999995
ACP2	64.8056	0.326043	0.25448	1.28121	0.200118	0.999995
ACP3	397.091	0.336696	0.252702	1.33238	0.182734	0.999995
ACP4	0.75698	-0.263105	1.56762	-0.167837	0.866711
ACP5	145.398	0.415219	0.28039	1.48086	0.138644	0.999995
ACP6	105.707	-0.178312	0.17961	-0.992774	0.32082	0.999995
ACP7	0.137202	-0.178956	3.14975	-0.0568159	0.954692
ACR	0
ACRBP	369.129	0.322035	0.542457	0.593659	0.55274	0.999995
ACRV1	0.91881	0.761556	1.64922	0.461768	0.644248
ACSBG1	15.447	0.21268	0.509528	0.417407	0.676381	0.999995
ACSBG2	2.16902	-0.81266	0.794326	-1.02308	0.306269
ACSF2	70.4543	0.107167	0.250537	0.427748	0.668834	0.999995
ACSF3	181.419	-0.101658	0.188722	-0.538664	0.590119	0.999995
ACSL1	15259.9	0.463578	0.341108	1.35903	0.174136	0.999995
ACSL3	682.076	0.137451	0.13995	0.982145	0.326028	0.999995
ACSL4	3216.68	0.347061	0.253189	1.37076	0.170451	0.999995
ACSL5	754.854	0.0686241	0.137453	0.499255	0.6176	0.999995
ACSL6	169.529	-0.162683	0.171768	-0.947112	0.343582	0.999995
ACSM1	9.06899	0.250469	0.588569	0.425556	0.670432	0.999995
ACSM2A	0.0599736	-0.178956	3.14975	-0.0568159	0.954692
ACSM2B	0
ACSM3	108.163	-0.276203	0.347904	-0.793904	0.427251	0.999995
ACSM4	0.621681	0.504352	1.8925	0.2665	0.789855
ACSM5	1.30508	0.332859	1.45222	0.229207	0.818708
ACSM6	0.525503	1.0192	2.28347	0.446336	0.655355
ACSS1	426.599	-0.162937	0.235094	-0.693075	0.488263	0.999995
ACSS2	399.153	0.169176	0.123163	1.37359	0.169569	0.999995
ACSS3	118.011	0.0606723	0.357062	0.169921	0.865072	0.999995
ACTA1	0.398069	1.25379	2.27894	0.550164	0.582207
ACTA2	19.5068	-0.0557917	0.327802	-0.170199	0.864853	0.999995
ACTB	29872.4	-0.094179	0.193091	-0.487745	0.625731	0.999995
ACTBL2	0
ACTC1	0
ACTG1	8466.01	-0.145248	0.183133	-0.79313	0.427702	0.999995
ACTG2	0.596842	-1.20459	1.43466	-0.839635	0.401113
ACTL10	6.76044	-0.099144	0.551201	-0.179869	0.857255
ACTL6A	338.125	-0.027274	0.183383	-0.148727	0.881769	0.999995
ACTL6B	0.478494	1.88046	1.66119	1.132	0.257636
ACTL7A	0.181113	1.3599	3.14975	0.431748	0.665924
ACTL7B	0
ACTL8	0
ACTL9	0.0537838	-0.178956	3.14975	-0.0568159	0.954692
ACTN1	2215.72	0.0267772	0.25768	0.103916	0.917236	0.999995
ACTN2	0.560129	-0.91375	1.69043	-0.540543	0.588823
ACTN3	0.93607	-2.72047	1.44307	-1.8852	0.059403
ACTN4	1116.62	-0.16413	0.218293	-0.751879	0.452124	0.999995
ACTR10	884.384	0.140143	0.275952	0.507852	0.611557	0.999995
ACTR1A	713.862	-0.0820888	0.158902	-0.516602	0.605434	0.999995
ACTR1B	262.752	-0.22691	0.215548	-1.05271	0.292472	0.999995
ACTR2	20129.2	0.238373	0.293644	0.811776	0.41692	0.999995
ACTR3	11083.7	0.256435	0.296578	0.864648	0.387232	0.999995
ACTR3B	60.6129	-0.0483621	0.201309	-0.240237	0.810146	0.999995
ACTR3C	11.9563	-0.1503	0.425022	-0.35363	0.723616	0.999995
ACTR5	111.598	-0.0754228	0.156271	-0.482642	0.62935	0.999995
ACTR6	540.396	-0.0160872	0.297234	-0.054123	0.956837	0.999995
ACTR8	296.604	0.104556	0.122326	0.854731	0.3927	0.999995
ACTRT1	0
ACTRT2	0
ACTRT3	0.7473	-0.340192	1.55303	-0.21905	0.826611
ACVR1	147.346	0.086137	0.22032	0.390962	0.695825	0.999995
ACVR1B	156.152	-0.127142	0.263012	-0.483409	0.628805	0.999995
ACVR1C	69.5774	0.183915	0.256475	0.717087	0.47332	0.999995
ACVR2A	159.54	0.0143796	0.239299	0.0600905	0.952084	0.999995
ACVR2B	109.21	-0.820837	0.212688	-3.85935	0.00011369	0.0608738
ACVRL1	7.75329	0.423118	0.498083	0.849494	0.395607	0.999995
ACY1	0.389546	1.58023	1.95127	0.809848	0.418027
ACY3	2.41464	0.13281	1.03244	0.128637	0.897645
ACYP1	94.4253	-0.114208	0.216289	-0.528034	0.597476	0.999995
ACYP2	69.9339	-0.177333	0.297347	-0.596384	0.550919	0.999995
ADA	143.46	-0.0156011	0.218259	-0.0714799	0.943016	0.999995
ADA2	2206	0.311649	0.358121	0.870233	0.384173	0.999995
ADAD1	0.193046	-0.223585	3.14224	-0.0711547	0.943275
ADAD2	0.568307	0.382146	1.91569	0.199482	0.841885
ADAL	52.6316	0.0085039	0.314527	0.0270371	0.97843	0.999995
ADAM10	5473.37	0.220777	0.165743	1.33204	0.182846	0.999995
ADAM11	0.801317	-1.06899	1.3994	-0.763891	0.444932
ADAM12	47.4555	0.383343	0.409002	0.937265	0.348622	0.999995
ADAM15	218.577	0.0728817	0.271321	0.268618	0.788223	0.999995
ADAM17	735.929	0.167256	0.100626	1.66215	0.0964831	0.999995
ADAM18	0
ADAM19	848.307	0.124787	0.241395	0.516941	0.605197	0.999995
ADAM2	0
ADAM20	2.2462	0.187013	0.773398	0.241807	0.80893
ADAM21	2.34472	1.19353	0.81758	1.45983	0.144337
ADAM22	92.5822	-0.121158	0.174395	-0.694734	0.487222	0.999995
ADAM23	21.9934	-0.277871	0.412829	-0.673091	0.500889	0.999995
ADAM28	888.465	0.489402	0.135908	3.60097	0.000317036	0.0976074
ADAM29	1.13423	1.55504	1.78069	0.873279	0.382511
ADAM30	0
ADAM32	0.739917	-0.450612	1.36984	-0.328952	0.742192
ADAM33	0.280259	1.90765	3.13135	0.609213	0.542384
ADAM7	0
ADAM8	2092.08	-0.183929	0.252942	-0.727162	0.467127	0.999995
ADAM9	462.093	0.243523	0.214248	1.13664	0.255688	0.999995
ADAMDEC1	11.907	0.36004	0.496331	0.725403	0.468205	0.999995
ADAMTS1	62.3983	-0.776871	0.456995	-1.69995	0.0891394	0.999995
ADAMTS10	73.5346	-0.54736	0.284442	-1.92433	0.054313	0.970441
ADAMTS12	0.577928	1.23211	1.9146	0.643535	0.519877
ADAMTS13	2.62484	0.0625348	0.797378	0.0784256	0.937489
ADAMTS14	0.865476	-0.7028	1.3197	-0.532543	0.59435
ADAMTS15	0.161351	-1.09611	3.12464	-0.350794	0.725743
ADAMTS16	0.570148	0.325734	1.65427	0.196904	0.843902
ADAMTS17	5.44215	-0.520941	0.538438	-0.967506	0.333291
ADAMTS18	0
ADAMTS19	0
ADAMTS2	3.78697	4.32305	2.42465	1.78296	0.0745929
ADAMTS20	0
ADAMTS3	0.816245	0.233248	1.47029	0.15864	0.873952
ADAMTS4	9.50331	-0.285482	0.414793	-0.688252	0.491294	0.999995
ADAMTS5	32.4579	0.21203	0.4215	0.503036	0.614939	0.999995
ADAMTS6	21.1293	0.238183	0.362812	0.656492	0.511507	0.999995
ADAMTS7	0
ADAMTS8	1.36855	-0.776283	1.06219	-0.730833	0.464881
ADAMTS9	0
ADAMTSL1	0.0535053	-0.178956	3.14975	-0.0568159	0.954692
ADAMTSL2	0.992571	-2.27353	1.44021	-1.57861	0.114425
ADAMTSL3	0.420051	0.304007	1.99085	0.152702	0.878633
ADAMTSL4	220.67	0.165055	0.263944	0.625341	0.531747	0.999995
ADAMTSL5	3.17719	-0.424785	0.896372	-0.473893	0.635576
ADAP1	49.9253	-0.142959	0.275754	-0.518428	0.604159	0.999995
ADAP2	93.6107	0.383189	0.267851	1.4306	0.152544	0.999995
ADAR	8181.03	0.47667	0.240068	1.98556	0.0470822	0.938526
ADARB1	213.898	0.0931553	0.188677	0.49373	0.621497	0.999995
ADARB2	30.7102	1.48458	1.07806	1.37709	0.168484	0.999995
ADAT1	347.801	-0.107235	0.132381	-0.810044	0.417915	0.999995
ADAT2	237.096	-0.13122	0.247505	-0.53017	0.595994	0.999995
ADAT3	6.49587	-0.414582	0.67024	-0.618558	0.536208
ADCK1	33.3415	0.224838	0.29112	0.772322	0.439924	0.999995
ADCK2	49.3312	-0.0568334	0.249903	-0.227422	0.820095	0.999995
ADCK5	34.8557	-0.224641	0.341043	-0.658689	0.510096	0.999995
ADCY1	0.356501	2.21122	2.85968	0.773238	0.439381
ADCY10	7.79005	-0.145544	0.425576	-0.341993	0.732356	0.999995
ADCY2	0.0599736	-0.178956	3.14975	-0.0568159	0.954692
ADCY3	38.375	0.0726233	0.32142	0.225945	0.821244	0.999995
ADCY4	46.216	-0.16247	0.290854	-0.558597	0.576437	0.999995
ADCY5	4.58751	-0.174179	0.59013	-0.295154	0.767877
ADCY6	3.9768	1.64524	0.804888	2.04406	0.040948
ADCY7	400.288	-0.177671	0.35119	-0.505911	0.612919	0.999995
ADCY8	0.0535053	-0.178956	3.14975	-0.0568159	0.954692
ADCY9	54.4653	-0.345214	0.379372	-0.909961	0.362843	0.999995
ADCYAP1	0
ADCYAP1R1	0
ADD1	1350.24	-0.0775684	0.186311	-0.416339	0.677162	0.999995
ADD2	61.7376	0.222282	0.265334	0.837746	0.402173	0.999995
ADD3	6842.23	0.102839	0.131628	0.781289	0.434632	0.999995
ADGB	2.0744	0.328723	1.06997	0.307225	0.758672
ADGRA1	0
ADGRA2	13.4606	-0.244294	0.486395	-0.502254	0.615489	0.999995
ADGRA3	30.2425	-0.14944	0.438059	-0.34114	0.732998	0.999995
ADGRB1	4.06002	-0.461867	0.751192	-0.614845	0.538657
ADGRB2	4.22146	0.128732	0.663616	0.193986	0.846187
ADGRB3	0.698286	0.298094	1.38039	0.215949	0.829028
ADGRD1	20.3653	0.43585	0.51173	0.851717	0.394371	0.999995
ADGRD2	0
ADGRE1	724.868	0.305229	0.350547	0.870722	0.383906	0.999995
ADGRE2	1952.86	0.29029	0.306946	0.945737	0.344283	0.999995
ADGRE3	2611.84	0.126161	0.387649	0.325451	0.74484	0.999995
ADGRE5	3544.2	0.00274993	0.256208	0.0107332	0.991436	0.999995
ADGRF1	0.0842727	0.879007	3.14975	0.279072	0.78019
ADGRF3	6.86173	-0.425193	0.480167	-0.88551	0.375881
ADGRF4	0
ADGRF5	0
ADGRG1	535.128	-0.855219	0.475555	-1.79836	0.0721198	0.999995
ADGRG2	7.37191	-0.227994	0.489481	-0.465786	0.641368
ADGRG3	1302.06	0.36294	0.413427	0.877881	0.380008	0.999995
ADGRG4	0
ADGRG5	278.943	-0.568765	0.224582	-2.53255	0.0113237	0.549903
ADGRG6	13.2704	0.466827	0.336992	1.38528	0.165968	0.999995
ADGRG7	0.146925	0.301937	3.14975	0.0958607	0.923631
ADGRL1	87.5038	-0.13027	0.352192	-0.369882	0.71147	0.999995
ADGRL2	0.423405	1.91272	2.73304	0.699852	0.48402
ADGRL3	0.168545	1.3599	3.14975	0.431748	0.665924
ADGRL4	0.470346	1.29294	2.24209	0.576668	0.564164
ADGRV1	16.1029	0.757287	0.441687	1.71453	0.0864308	0.999995
ADH1A	0.389863	-2.06513	2.79706	-0.738319	0.46032
ADH1B	0
ADH1C	0
ADH4	0.313228	-0.997541	2.40392	-0.414964	0.678169
ADH5	966.293	-0.00970026	0.232997	-0.0416326	0.966792	0.999995
ADH6	4.60991	-0.0739901	0.82761	-0.0894021	0.928762
ADH7	0
ADHFE1	28.955	-0.190261	0.274338	-0.693529	0.487977	0.999995
ADI1	450.766	-0.0659415	0.164877	-0.399944	0.689198	0.999995
ADIG	0
ADIPOQ	0
ADIPOR1	12512.2	0.848259	0.498619	1.70122	0.088902	0.999995
ADIPOR2	808.2	-0.136132	0.093019	-1.46349	0.143334	0.999995
ADIRF	0
ADK	348.978	-0.00283254	0.35499	-0.00797921	0.993634	0.999995
ADM	386.795	0.508268	0.46579	1.09119	0.275187	0.999995
ADM2	5.12172	0.0138848	0.555949	0.0249749	0.980075
ADM5	0.838349	-1.25439	1.48739	-0.843353	0.399031
ADNP	1470.15	-0.0791652	0.0827287	-0.956925	0.338605	0.999995
ADNP2	211.799	-0.270712	0.147004	-1.84153	0.065544	0.999995
ADO	275.799	0.0677324	0.16009	0.423089	0.672231	0.999995
ADORA1	0.113479	-0.747427	3.1401	-0.238027	0.81186
ADORA2A	2.8483	0.558691	0.713353	0.78319	0.433515
ADORA2B	31.3888	0.127556	0.279904	0.455712	0.648597	0.999995
ADORA3	81.5411	-0.427429	0.518952	-0.823639	0.410145	0.999995
ADPGK	1866.21	0.156452	0.105055	1.48924	0.136424	0.999995
ADPRH	134.944	0.554242	0.317284	1.74683	0.0806666	0.999995
ADPRHL1	3.95184	-0.553807	0.615795	-0.899337	0.368473
ADPRM	208.168	0.175232	0.311561	0.562434	0.573821	0.999995
ADPRS	153.906	-0.0364656	0.184487	-0.19766	0.843311	0.999995
ADRA1A	0
ADRA1B	0
ADRA1D	0
ADRA2A	5.91287	-0.783306	0.739898	-1.05867	0.289751
ADRA2B	0.0876938	0.879007	3.14975	0.279072	0.78019
ADRA2C	0
ADRB1	5.54426	0.0963593	0.660385	0.145914	0.883989
ADRB2	321.28	-0.00610585	0.186678	-0.0327079	0.973908	0.999995
ADRB3	0
ADRM1	89.9254	-0.0879669	0.157969	-0.556861	0.577623	0.999995
ADSL	86.871	0.134381	0.219521	0.612156	0.540435	0.999995
ADSS1	8.53198	-0.324701	0.500777	-0.648395	0.51673	0.999995
ADSS2	825.103	-0.119548	0.109906	-1.08773	0.276714	0.999995
ADTRP	49.2339	-0.792774	0.389006	-2.03795	0.0415552	0.892513
AEBP1	24.9657	-0.0134464	0.315736	-0.0425875	0.96603	0.999995
AEBP2	351.486	-0.0669469	0.112318	-0.59605	0.551142	0.999995
AEN	127.293	-0.132644	0.294432	-0.450507	0.652345	0.999995
AFAP1	7.05077	0.244353	0.484307	0.504542	0.613881
AFAP1L1	2.45925	-0.116645	0.929592	-0.12548	0.900144
AFAP1L2	32.8766	-0.0634308	0.28157	-0.225275	0.821765	0.999995
AFDN	262.07	0.367858	0.38377	0.958535	0.337793	0.999995
AFF1	2288.22	0.495228	0.157524	3.14383	0.00166754	0.231544
AFF2	32.932	0.0110551	0.238235	0.0464042	0.962988	0.999995
AFF3	201.53	0.354981	0.231205	1.53535	0.124698	0.999995
AFF4	1939.38	0.0512569	0.0826515	0.620158	0.535154	0.999995
AFG1L	40.3519	0.0862215	0.21447	0.40202	0.687669	0.999995
AFG3L2	190.622	0.00333909	0.155593	0.0214604	0.982878	0.999995
AFM	0
AFMID	29.7084	0.352588	0.22034	1.6002	0.109554	0.999995
AFP	0
AFTPH	1958.53	0.28406	0.236334	1.20195	0.229385	0.999995
AGA	300.411	-0.265349	0.242831	-1.09273	0.274511	0.999995
AGAP1	42.8292	-0.253641	0.316533	-0.801309	0.422953	0.999995
AGAP2	217.256	-0.141447	0.223466	-0.632971	0.526753	0.999995
AGAP3	84.0566	-0.167035	0.263121	-0.63482	0.525546	0.999995
AGAP4	175.496	-0.0241849	0.154583	-0.156452	0.875677	0.999995
AGAP5	3.95726	0.124135	0.686229	0.180895	0.85645
AGAP6	42.5396	-0.158349	0.334666	-0.473156	0.636102	0.999995
AGAP9	52.9611	-0.429351	0.621497	-0.690834	0.48967	0.999995
AGBL1	0
AGBL2	27.8513	-0.165784	0.301263	-0.550296	0.582116	0.999995
AGBL3	61.8233	-0.2387	0.240896	-0.990887	0.321741	0.999995
AGBL4	0.0535053	-0.178956	3.14975	-0.0568159	0.954692
AGBL5	101.413	0.0838417	0.164375	0.510064	0.610007	0.999995
AGER	193.978	0.01374	0.265142	0.0518212	0.958671	0.999995
AGFG1	1331.13	0.065572	0.0845576	0.775471	0.438061	0.999995
AGFG2	88.2783	-0.206024	0.241578	-0.852825	0.393756	0.999995
AGGF1	344.324	0.0580228	0.15576	0.372514	0.70951	0.999995
AGK	476.841	-0.14446	0.193709	-0.745754	0.455816	0.999995
AGL	548.911	-0.0534677	0.141644	-0.37748	0.705817	0.999995
AGMAT	36.4909	-0.099679	0.234845	-0.424446	0.67124	0.999995
AGMO	24.1597	-0.179703	0.43793	-0.410346	0.681552	0.999995
AGO1	767.258	-0.0295087	0.167132	-0.176559	0.859855	0.999995
AGO2	1494.18	0.0928451	0.15132	0.613567	0.539502	0.999995
AGO3	888.075	0.0477509	0.209225	0.228227	0.81947	0.999995
AGO4	3822.75	0.118704	0.195184	0.608162	0.54308	0.999995
AGPAT1	101.43	-0.0291908	0.223598	-0.13055	0.896131	0.999995
AGPAT2	142.127	0.0192528	0.227544	0.0846114	0.93257	0.999995
AGPAT3	403.147	-0.00842029	0.285425	-0.0295009	0.976465	0.999995
AGPAT4	223.077	-0.111036	0.264463	-0.419853	0.674593	0.999995
AGPAT5	483.017	0.349597	0.180174	1.94033	0.0523394	0.960623
AGPS	867.585	0.121137	0.121181	0.999637	0.317486	0.999995
AGR2	0.22575	0.782837	2.5753	0.303979	0.761144
AGR3	0
AGRN	18.1155	1.01114	0.695841	1.45311	0.146192	0.999995
AGRP	1.48297	-0.320967	1.22519	-0.261972	0.793343
AGT	20.1809	-0.187316	0.320144	-0.585099	0.558481	0.999995
AGTPBP1	2909.03	0.195876	0.247579	0.791165	0.428848	0.999995
AGTR1	0.0876938	0.879007	3.14975	0.279072	0.78019
AGTR2	0
AGTRAP	715.719	0.0462852	0.176503	0.262235	0.79314	0.999995
AGXT	0
AGXT2	0
AHCTF1	2586.22	0.177214	0.212062	0.835674	0.403338	0.999995
AHCY	150.475	-0.0296618	0.161863	-0.183253	0.8546	0.999995
AHCYL1	996.256	-0.00249617	0.0890286	-0.0280378	0.977632	0.999995
AHCYL2	293.664	0.0742624	0.215427	0.344721	0.730304	0.999995
AHDC1	32.3388	-0.579329	0.305125	-1.89866	0.0576089	0.981666
AHI1	104.063	-0.262086	0.194358	-1.34847	0.177507	0.999995
AHNAK	12181.3	0.0239894	0.256815	0.0934111	0.925577	0.999995
AHNAK2	3.93634	-0.0550549	0.763755	-0.0720846	0.942535
AHR	559.337	0.331338	0.175385	1.88921	0.0588643	0.986364
AHRR	0.525763	-0.315335	1.69504	-0.186034	0.852418
AHSA1	659.17	0.0810413	0.218557	0.370801	0.710786	0.999995
AHSG	0.0537838	-0.178956	3.14975	-0.0568159	0.954692
AHSP	453.131	0.567428	0.952188	0.59592	0.551228	0.999995
AICDA	6.32048	1.20063	0.479205	2.50547	0.012229
AIDA	730.636	0.378888	0.225186	1.68255	0.0924619	0.999995
AIF1	5387.38	0.199283	0.483868	0.411854	0.680446	0.999995
AIF1L	0.818221	-2.43706	1.52664	-1.59635	0.11041
AIFM1	235.385	0.0284047	0.132533	0.214321	0.830296	0.999995
AIFM2	28.6131	-0.0320189	0.304369	-0.105197	0.916219	0.999995
AIFM3	11.3519	0.523027	0.465163	1.1244	0.260845	0.999995
AIG1	258.97	0.481401	0.353747	1.36086	0.173557	0.999995
AIM2	454.382	1.13385	0.354851	3.19527	0.00139698	0.220562
AIMP1	877.708	-0.0245119	0.138722	-0.176697	0.859746	0.999995
AIMP2	51.0101	0.10111	0.21227	0.476326	0.633842	0.999995
AIP	408.788	-0.0898055	0.115879	-0.774994	0.438343	0.999995
AIPL1	0.0535053	-0.178956	3.14975	-0.0568159	0.954692
AIRE	8.64157	1.13232	0.628294	1.80221	0.0715126	0.999995
AJAP1	9.35868	-1.21878	0.484689	-2.51457	0.0119178	0.564085
AJM1	15.6983	-0.618279	0.510972	-1.21001	0.226277	0.999995
AJUBA	6.32937	-0.168849	0.562569	-0.300139	0.764071
AK1	16.0876	-0.703513	0.366819	-1.91788	0.0551266	0.971197
AK2	1626.03	0.0111428	0.128141	0.0869577	0.930705	0.999995
AK3	512.395	-0.043187	0.12775	-0.338058	0.735319	0.999995
AK4	14.3369	0.634699	0.396429	1.60104	0.109368	0.999995
AK4P3	1.2154	2.33264	1.37638	1.69477	0.0901187
AK5	104.918	-0.970512	0.310856	-3.12206	0.00179589	0.23781
AK6	135.383	-0.002769	0.304971	-0.00907958	0.992756	0.999995
AK7	1.60661	0.382008	1.09005	0.350451	0.726
AK8	1.53258	1.48513	1.5062	0.986016	0.324125
AK9	141.073	-0.142714	0.181094	-0.788068	0.430657	0.999995
AKAIN1	0
AKAP1	128.234	-0.323262	0.316675	-1.0208	0.307349	0.999995
AKAP10	926.443	-0.0618673	0.153924	-0.401934	0.687733	0.999995
AKAP11	1146.63	0.0470986	0.169614	0.277681	0.781257	0.999995
AKAP12	87.9878	0.184189	0.334286	0.550993	0.581638	0.999995
AKAP13	3090.11	-0.0541223	0.209552	-0.258276	0.796194	0.999995
AKAP14	0.389495	0.78284	2.30152	0.340141	0.73375
AKAP17A	590.24	-0.178707	0.25018	-0.714311	0.475035	0.999995
AKAP3	10.0673	0.391739	0.477968	0.819592	0.412449	0.999995
AKAP4	0
AKAP5	90.3189	-0.543236	0.25586	-2.12317	0.0337394	0.833166
AKAP6	24.6006	-0.284184	0.333717	-0.851571	0.394452	0.999995
AKAP7	217.005	0.103074	0.272997	0.377566	0.705753	0.999995
AKAP8	376.092	-0.235982	0.13358	-1.7666	0.0772957	0.999995
AKAP8L	191.226	-0.182726	0.149131	-1.22527	0.220475	0.999995
AKAP9	1505.85	0.126715	0.112174	1.12963	0.258633	0.999995
AKIP1	45.6908	-0.28314	0.242471	-1.16773	0.242917	0.999995
AKIRIN1	1545.49	0.111469	0.226877	0.491319	0.623201	0.999995
AKIRIN2	637.174	0.046254	0.183427	0.252166	0.800913	0.999995
AKNA	2274.01	-0.235805	0.2227	-1.05885	0.289669	0.999995
AKNAD1	0.414048	-1.47217	1.83618	-0.801755	0.422695
AKR1A1	414.117	0.268291	0.17044	1.57411	0.115463	0.999995
AKR1B1	411.065	-0.0429215	0.133902	-0.320543	0.748557	0.999995
AKR1B10	0.0798014	0.879007	3.14975	0.279072	0.78019
AKR1B15	0
AKR1C1	11.0355	0.482055	0.61668	0.781693	0.434395	0.999995
AKR1C2	2.32434	0.407387	1.00898	0.403762	0.686388
AKR1C3	160.303	-0.890135	0.309544	-2.87563	0.00403225	0.348063
AKR1C4	5.11076	0.338206	0.77941	0.433925	0.664343
AKR1C8	3.02056	-0.953716	0.810113	-1.17726	0.239091
AKR1D1	0
AKR1E2	5.54777	-0.751382	0.582307	-1.29035	0.196928
AKR7A2	144.684	-0.112946	0.1691	-0.667927	0.504181	0.999995
AKR7A3	1.009	-0.652208	1.12097	-0.581823	0.560686
AKR7L	1.47347	-0.477614	1.04454	-0.457248	0.647493
AKT1	556.963	-0.316221	0.146971	-2.15158	0.0314302	0.799717
AKT1S1	96.6163	-0.133236	0.193522	-0.688483	0.491149	0.999995
AKT2	661.531	-0.201233	0.142188	-1.41526	0.156992	0.999995
AKT3	452.347	-0.230055	0.155051	-1.48374	0.137879	0.999995
AKTIP	541.332	0.150727	0.290582	0.518707	0.603965	0.999995
ALAD	352.15	0.0922151	0.15256	0.604453	0.545542	0.999995
ALAS1	323.985	0.121826	0.123427	0.987028	0.323629	0.999995
ALAS2	7896.97	1.94937	0.783511	2.488	0.0128465	0.581633
ALB	1.39809	0.754088	1.08643	0.694099	0.48762
ALCAM	619.156	0.191758	0.16182	1.18501	0.236013	0.999995
ALDH16A1	103.444	-0.15793	0.287087	-0.550111	0.582243	0.999995
ALDH18A1	221.222	-0.070876	0.141106	-0.502289	0.615464	0.999995
ALDH1A1	714.365	0.871291	0.253688	3.4345	0.00059365	0.130521
ALDH1A2	22.9928	0.466533	0.440625	1.0588	0.289691	0.999995
ALDH1A3	0.974553	-1.07012	1.53467	-0.697298	0.485616
ALDH1B1	38.9415	-0.288997	0.255214	-1.13237	0.257478	0.999995
ALDH1L1	0.249045	-0.615212	3.12464	-0.19689	0.843913
ALDH1L2	7.24882	-0.3552	0.535719	-0.663034	0.507309
ALDH2	353.008	0.185793	0.250924	0.740439	0.459034	0.999995
ALDH3A1	0
ALDH3A2	471.463	-0.00638688	0.146507	-0.0435943	0.965228	0.999995
ALDH3B1	262.957	-0.126367	0.21327	-0.592522	0.553501	0.999995
ALDH3B2	0.200745	0.301937	3.14975	0.0958607	0.923631
ALDH4A1	22.3064	0.171146	0.402243	0.425478	0.670488	0.999995
ALDH5A1	204.653	0.195986	0.250946	0.780992	0.434807	0.999995
ALDH6A1	95.454	-0.0368267	0.217758	-0.169117	0.865704	0.999995
ALDH7A1	10.3683	0.483098	0.404525	1.19424	0.232386	0.999995
ALDH8A1	13.735	-0.228853	0.345132	-0.663089	0.507274	0.999995
ALDH9A1	733.265	0.0669647	0.195735	0.34212	0.732261	0.999995
ALDOA	10.6391	0.0155612	0.389811	0.0399199	0.968157	0.999995
ALDOB	4.5363	1.03366	0.676911	1.52702	0.126755
ALDOC	104.749	-0.14683	0.227901	-0.644271	0.519399	0.999995
ALG1	83.2142	0.150535	0.182488	0.824905	0.409425	0.999995
ALG10	81.0683	-0.101623	0.217497	-0.467236	0.640331	0.999995
ALG10B	262.307	-0.0698954	0.214168	-0.326357	0.744154	0.999995
ALG11	100.623	-0.0243002	0.168227	-0.144449	0.885146	0.999995
ALG12	40.8489	-0.109533	0.314661	-0.348099	0.727766	0.999995
ALG13	832.531	0.134373	0.149153	0.900906	0.367639	0.999995
ALG14	36.3283	0.109128	0.266367	0.40969	0.682033	0.999995
ALG1L2	3.07957	0.431663	0.743451	0.580621	0.561496
ALG2	253.315	-0.0408986	0.190317	-0.214897	0.829848	0.999995
ALG3	94.672	0.00652218	0.302065	0.021592	0.982773	0.999995
ALG5	246.499	0.0534442	0.185049	0.288811	0.772726	0.999995
ALG6	368.347	-0.0577241	0.140617	-0.410505	0.681435	0.999995
ALG8	200.958	0.108305	0.181787	0.595782	0.551321	0.999995
ALG9	42.3463	0.110531	0.297863	0.37108	0.710578	0.999995
ALK	0.80363	-1.07602	1.57579	-0.682844	0.494705
ALKAL1	0.201173	-0.266571	2.64298	-0.10086	0.919662
ALKAL2	4.94693	0.00743649	0.695571	0.0106912	0.99147
ALKBH1	158.946	-0.0272695	0.141715	-0.192425	0.847409	0.999995
ALKBH2	58.1183	-0.0492232	0.224702	-0.21906	0.826604	0.999995
ALKBH3	158.647	0.133712	0.230899	0.579091	0.562528	0.999995
ALKBH4	44.498	-0.109683	0.222002	-0.494064	0.621261	0.999995
ALKBH5	420.723	-0.266742	0.143523	-1.85853	0.0630942	0.992344
ALKBH6	10.9381	-0.0980873	0.499771	-0.196265	0.844403	0.999995
ALKBH7	149.889	0.0127265	0.226284	0.0562415	0.955149	0.999995
ALKBH8	271.475	-0.100857	0.150691	-0.669294	0.503308	0.999995
ALLC	0
ALMS1	334.885	-0.00243875	0.163835	-0.0148854	0.988124	0.999995
ALOX12	84.446	0.432447	0.238408	1.8139	0.0696936	0.999995
ALOX12B	0.511364	-1.68173	1.56256	-1.07627	0.281808
ALOX15	222.72	-0.740837	0.387915	-1.90979	0.0561603	0.971197
ALOX15B	5.10073	0.436615	0.852393	0.512222	0.608495
ALOX5	2182.04	0.204629	0.22818	0.896786	0.369833	0.999995
ALOX5AP	3708.69	0.0786088	0.524518	0.149869	0.880868	0.999995
ALOXE3	0
ALPG	0
ALPI	0
ALPK1	3186.27	0.372514	0.228986	1.6268	0.10378	0.999995
ALPK2	2.04225	-1.41101	0.928471	-1.51971	0.128583
ALPK3	6.61104	0.706806	0.520809	1.35713	0.17474
ALPL	2629.66	0.13392	0.492943	0.271676	0.785872	0.999995
ALPP	0.0537838	-0.178956	3.14975	-0.0568159	0.954692
ALS2	308.472	-0.243083	0.175001	-1.38904	0.164821	0.999995
ALS2CL	32.7783	-0.148115	0.375682	-0.394257	0.693392	0.999995
ALX1	0
ALX3	0
ALX4	0
ALYREF	109.289	-0.0557578	0.167499	-0.332883	0.739222	0.999995
AMACR	2.79795	-0.609878	0.796132	-0.766052	0.443645
AMBN	2.01496	0.693438	1.36167	0.509255	0.610573
AMBP	0.0537838	-0.178956	3.14975	-0.0568159	0.954692
AMBRA1	161.236	-0.0542094	0.182004	-0.297848	0.765819	0.999995
AMD1	3739.13	0.176377	0.407067	0.433289	0.664805	0.999995
AMDHD1	30.0367	0.189139	0.327142	0.578154	0.56316	0.999995
AMDHD2	35.9983	-0.22726	0.235962	-0.963124	0.335486	0.999995
AMELX	0.120944	-0.178956	3.14975	-0.0568159	0.954692
AMELY	0
AMER1	52.4208	-0.216626	0.280632	-0.771923	0.44016	0.999995
AMER2	0
AMER3	0
AMFR	520.696	0.017691	0.141267	0.125231	0.900341	0.999995
AMH	0.924186	-1.3661	1.38103	-0.989189	0.32257
AMHR2	0
AMIGO1	171.039	-0.432524	0.206171	-2.09789	0.0359151	0.837678
AMIGO2	206.671	-0.0959691	0.175093	-0.548104	0.58362	0.999995
AMIGO3	0.167541	-1.12934	3.12334	-0.361582	0.717664
AMMECR1	240.923	0.0320702	0.188588	0.170055	0.864967	0.999995
AMMECR1L	317.55	-0.163957	0.152385	-1.07594	0.281955	0.999995
AMN	4.39295	0.558489	0.733462	0.761443	0.446392
AMN1	108.366	0.399489	0.284655	1.40341	0.160494	0.999995
AMOT	44.8047	-0.119429	0.19073	-0.626169	0.531204	0.999995
AMOTL1	14.3165	0.234505	0.540755	0.433661	0.664534	0.999995
AMOTL2	0.248017	0.879007	3.14975	0.279072	0.78019
AMPD1	0.141199	0.301937	3.14975	0.0958607	0.923631
AMPD2	875.681	-0.200867	0.197843	-1.01528	0.30997	0.999995
AMPD3	708.567	0.192769	0.17238	1.11828	0.263446	0.999995
AMPH	34.1256	-0.178711	0.351173	-0.508897	0.610825	0.999995
AMT	2.82664	-0.280667	0.713618	-0.393302	0.694097
AMTN	0
AMY1A	0
AMY1B	1.50766	0.0680636	0.987727	0.0689093	0.945062
AMY1C	0.250758	1.79041	3.09558	0.578375	0.563011
AMY2A	0.290695	0.782839	2.41269	0.324467	0.745584
AMY2B	478.505	0.0475446	0.160131	0.29691	0.766535	0.999995
AMZ1	2.99729	-0.212284	0.80174	-0.264779	0.79118
AMZ2	611.171	0.0116198	0.178371	0.0651441	0.948059	0.999995
ANAPC1	411.019	0.0323534	0.16839	0.192134	0.847637	0.999995
ANAPC10	40.0095	-0.141092	0.353264	-0.399396	0.689602	0.999995
ANAPC11	200.292	-0.0875812	0.3139	-0.27901	0.780237	0.999995
ANAPC13	793.485	0.14563	0.427666	0.340522	0.733464	0.999995
ANAPC15	20.5099	-0.232988	0.310901	-0.749398	0.453617	0.999995
ANAPC16	1554.27	0.0299015	0.213277	0.1402	0.888502	0.999995
ANAPC2	153.694	-0.16857	0.277149	-0.608228	0.543036	0.999995
ANAPC4	916.912	-0.00994842	0.146119	-0.0680844	0.945718	0.999995
ANAPC5	1553.32	0.00615396	0.12611	0.0487982	0.96108	0.999995
ANAPC7	395.612	0.0114408	0.114879	0.0995895	0.92067	0.999995
ANG	7.56602	0.32581	0.520442	0.626025	0.531298	0.999995
ANGEL1	128.998	-0.122701	0.334774	-0.36652	0.713977	0.999995
ANGEL2	842.943	-0.10051	0.126044	-0.797416	0.42521	0.999995
ANGPT1	138.03	0.359241	0.52689	0.681814	0.495357	0.999995
ANGPT2	5.50404	0.852646	0.676828	1.25977	0.207753
ANGPT4	4.21313	-0.614324	0.653391	-0.940209	0.34711
ANGPTL1	5.59873	0.700413	0.517637	1.3531	0.176025
ANGPTL2	0.491911	0.627493	2.25014	0.278869	0.780345
ANGPTL3	0.224741	0.782831	3.14975	0.248537	0.803719
ANGPTL4	0.582604	-2.62898	1.65147	-1.59191	0.111405
ANGPTL5	0
ANGPTL6	5.89346	1.1816	0.933389	1.26593	0.205539
ANGPTL7	0.205217	0.301937	3.14975	0.0958607	0.923631
ANGPTL8	0.0934196	0.879007	3.14975	0.279072	0.78019
ANHX	0
ANK1	202.041	0.750129	0.557267	1.34608	0.178275	0.999995
ANK2	1.45031	0.531898	0.950673	0.559496	0.575823
ANK3	152.039	0.229996	0.356343	0.645435	0.518645	0.999995
ANKAR	70.8108	0.135707	0.24688	0.549688	0.582534	0.999995
ANKDD1A	200.487	0.00481091	0.182399	0.0263757	0.978958	0.999995
ANKDD1B	13.893	-0.0639289	0.355221	-0.17997	0.857176	0.999995
ANKEF1	69.6152	-0.279373	0.202645	-1.37864	0.168007	0.999995
ANKFN1	0.288867	0.214308	2.46312	0.0870069	0.930666
ANKFY1	838.114	0.199463	0.298481	0.668261	0.503967	0.999995
ANKH	570.483	0.0921214	0.267582	0.344273	0.730641	0.999995
ANKHD1	99.7912	-0.02058	0.33227	-0.0619375	0.950613	0.999995
ANKHD1-EIF4EBP3	75.2358	0.0157505	0.216262	0.0728307	0.941941	0.999995
ANKIB1	773.402	-0.0539267	0.116619	-0.462416	0.643783	0.999995
ANKK1	3.36468	-0.294013	0.678457	-0.433355	0.664757
ANKLE1	10.1724	0.75572	0.504962	1.49659	0.1345	0.999995
ANKLE2	794.479	-0.0532667	0.141024	-0.377713	0.705644	0.999995
ANKMY1	99.1167	-0.0984158	0.288778	-0.340801	0.733253	0.999995
ANKMY2	231.055	0.00293992	0.209602	0.0140262	0.988809	0.999995
ANKRA2	518.989	-0.072552	0.113601	-0.638658	0.523046	0.999995
ANKRD1	0.890959	-0.365797	1.37251	-0.266517	0.789841
ANKRD10	1459.07	-0.0320315	0.141814	-0.225869	0.821304	0.999995
ANKRD11	614.623	-0.149746	0.203161	-0.737082	0.461073	0.999995
ANKRD12	3470.09	0.129202	0.191439	0.674898	0.49974	0.999995
ANKRD13A	3374.42	0.13259	0.206872	0.640929	0.521569	0.999995
ANKRD13B	3.73829	1.08109	0.626201	1.72643	0.0842708
ANKRD13C	393.348	0.058658	0.148435	0.395177	0.692712	0.999995
ANKRD13D	817.897	-0.0901521	0.159669	-0.56462	0.572332	0.999995
ANKRD16	14.6379	-0.721432	0.332171	-2.17187	0.0298653	0.792699
ANKRD17	1081.06	0.0515042	0.142229	0.362123	0.71726	0.999995
ANKRD18A	12.4284	0.16375	0.475821	0.344142	0.730739	0.999995
ANKRD18B	0.423405	1.91272	2.73304	0.699852	0.48402
ANKRD2	0.497086	-1.54309	2.77911	-0.555247	0.578726
ANKRD20A1	0.678364	0.577912	2.68234	0.21545	0.829416
ANKRD22	116.1	0.77785	0.337567	2.30428	0.0212069	0.70774
ANKRD23	7.00464	0.692464	0.474338	1.45985	0.144331
ANKRD24	2.59129	0.650702	0.930094	0.699608	0.484172
ANKRD26	122.716	-0.011201	0.250734	-0.0446729	0.964368	0.999995
ANKRD27	327.132	-0.0151802	0.175046	-0.0867209	0.930893	0.999995
ANKRD28	719.121	-0.0694884	0.24201	-0.28713	0.774013	0.999995
ANKRD29	1.68179	2.24613	1.00599	2.23275	0.0255657
ANKRD30A	0.0798014	0.879007	3.14975	0.279072	0.78019
ANKRD30B	0.429714	-2.24191	2.67395	-0.838428	0.40179
ANKRD30BL	0.261965	1.83588	3.05715	0.60052	0.54816
ANKRD31	6.14009	-0.248379	0.634164	-0.391663	0.695307
ANKRD33	0.0876938	0.879007	3.14975	0.279072	0.78019
ANKRD33B	77.8832	0.0389068	0.202646	0.191994	0.847747	0.999995
ANKRD34A	12.3979	-0.370201	0.422966	-0.875251	0.381437	0.999995
ANKRD34B	80.9879	-0.21575	0.377382	-0.571703	0.567523	0.999995
ANKRD34C	0
ANKRD35	4.60278	0.420059	0.604197	0.695235	0.486908
ANKRD36	116.245	0.140922	0.252841	0.557356	0.577284	0.999995
ANKRD36B	70.6041	-0.220678	0.341169	-0.646828	0.517744	0.999995
ANKRD36C	38.5455	0.03146	0.345211	0.0911329	0.927387	0.999995
ANKRD37	12.4486	-0.0952213	0.410095	-0.232193	0.816388	0.999995
ANKRD39	18.2042	-0.347094	0.355521	-0.976298	0.328917	0.999995
ANKRD40	194.179	-0.333693	0.236971	-1.40816	0.159083	0.999995
ANKRD40CL	0
ANKRD42	149.279	-0.0677215	0.193977	-0.349122	0.726998	0.999995
ANKRD44	5875.63	0.055698	0.091087	0.611481	0.540881	0.999995
ANKRD45	0.0798014	0.879007	3.14975	0.279072	0.78019
ANKRD46	258.401	0.0528843	0.266104	0.198736	0.84247	0.999995
ANKRD49	1059.44	0.107452	0.144836	0.741893	0.458152	0.999995
ANKRD50	219.584	0.0950955	0.157652	0.603198	0.546377	0.999995
ANKRD52	207.473	-0.320491	0.320985	-0.998463	0.318055	0.999995
ANKRD53	0.751062	-1.17207	1.34729	-0.869941	0.384333
ANKRD54	54.2289	-0.232725	0.194614	-1.19583	0.231763	0.999995
ANKRD55	70.5453	-0.206231	0.271564	-0.759421	0.447601	0.999995
ANKRD6	54.1281	-0.202869	0.21124	-0.960373	0.336868	0.999995
ANKRD60	0
ANKRD61	6.741	-0.297608	0.540642	-0.55047	0.581997
ANKRD62	0
ANKRD63	1.42112	-0.0315456	1.2836	-0.024576	0.980393
ANKRD65	0.255189	1.80859	3.07851	0.58749	0.556875
ANKRD66	0.507395	0.1222	1.94982	0.0626726	0.950027
ANKRD7	1.07988	0.335186	1.42461	0.235282	0.81399
ANKRD9	44.4873	0.721495	0.530934	1.35892	0.174173	0.999995
ANKS1A	159.033	-0.119845	0.232835	-0.514721	0.606748	0.999995
ANKS1B	5.02024	-0.217587	0.650436	-0.334526	0.737983
ANKS3	40.1292	-0.0321269	0.304951	-0.105351	0.916097	0.999995
ANKS4B	0
ANKS6	44.9112	-0.315087	0.261678	-1.2041	0.22855	0.999995
ANKUB1	26.455	-0.0653995	0.339422	-0.192679	0.847211	0.999995
ANKZF1	609.538	-0.176847	0.205607	-0.860122	0.389722	0.999995
ANLN	17.5716	-0.0283101	0.316256	-0.0895162	0.928672	0.999995
ANO1	0
ANO10	228.893	0.142874	0.233247	0.612545	0.540177	0.999995
ANO2	1.22866	0.698653	1.49076	0.468656	0.639316
ANO3	0
ANO4	0.0876938	0.879007	3.14975	0.279072	0.78019
ANO5	56.9467	0.893537	0.365779	2.44283	0.0145725	0.609062
ANO6	1255.78	0.247365	0.201442	1.22797	0.219458	0.999995
ANO7	0.804839	0.121661	1.43974	0.0845022	0.932657
ANO8	42.6636	-0.147856	0.332693	-0.444421	0.656738	0.999995
ANO9	90.8454	0.154814	0.254703	0.607819	0.543307	0.999995
ANOS1	4.13996	1.70132	0.802283	2.12059	0.0339561
ANP32A	4725.69	0.221979	0.357658	0.620646	0.534832	0.999995
ANP32B	1681.57	0.0825614	0.144767	0.570304	0.568471	0.999995
ANP32D	0.359883	-0.473381	2.91824	-0.162214	0.871137
ANP32E	1573.09	0.0241788	0.204017	0.118514	0.90566	0.999995
ANPEP	1949.63	-0.126397	0.252068	-0.501439	0.616062	0.999995
ANTKMT	24.0536	-0.323284	0.320249	-1.00948	0.312746	0.999995
ANTXR1	2.13843	-1.163	1.04837	-1.10934	0.267282
ANTXR2	2102.58	0.165735	0.203889	0.81287	0.416293	0.999995
ANTXRL	0.355636	0.679324	2.02697	0.335143	0.737517
ANXA1	7504.37	0.348347	0.253535	1.37396	0.169454	0.999995
ANXA10	1.18515	1.94799	1.14296	1.70433	0.0883186
ANXA11	1814.14	-0.139545	0.185561	-0.752019	0.45204	0.999995
ANXA13	0
ANXA2	3173.67	0.404965	0.255696	1.58377	0.113245	0.999995
ANXA2R	233.596	-0.0750516	0.159169	-0.471522	0.637268	0.999995
ANXA3	1316.75	0.917386	0.707131	1.29734	0.194516	0.999995
ANXA4	638.896	0.261491	0.162606	1.60813	0.107807	0.999995
ANXA5	3236.62	0.55323	0.176031	3.14281	0.00167336	0.231544
ANXA6	2890.97	-0.0543358	0.143559	-0.378492	0.705066	0.999995
ANXA7	1235.23	0.0310009	0.268668	0.115388	0.908138	0.999995
ANXA8	0.404929	-0.531225	1.70865	-0.310903	0.755874
ANXA8L1	0.197752	-0.26657	2.6551	-0.100399	0.920027
ANXA9	226.226	-0.184392	0.193128	-0.95477	0.339694	0.999995
AOAH	2442.36	0.261003	0.168957	1.54479	0.122398	0.999995
AOC1	21.8241	-1.33527	0.756667	-1.76467	0.0776191	0.999995
AOC2	157.091	0.0970633	0.236584	0.410269	0.681608	0.999995
AOC3	109.052	-0.0466985	0.222463	-0.209916	0.833733	0.999995
AOPEP	38.0574	0.318984	0.245531	1.29916	0.19389	0.999995
AOX1	0.856197	-1.1051	1.40391	-0.78716	0.431188
AP1AR	416.425	-0.028282	0.120074	-0.235538	0.813792	0.999995
AP1B1	310.019	-0.0614621	0.277652	-0.221364	0.824809	0.999995
AP1G1	2161.58	0.0699295	0.0972627	0.718975	0.472156	0.999995
AP1G2	195.331	0.0300942	0.180909	0.16635	0.867881	0.999995
AP1M1	355.844	-0.203518	0.237082	-0.858428	0.390656	0.999995
AP1M2	24.6327	-0.646137	0.50755	-1.27305	0.203	0.999995
AP1S1	99.4287	0.00103189	0.212309	0.00486032	0.996122	0.999995
AP1S2	1975.97	0.436331	0.13968	3.1238	0.0017853	0.23781
AP1S3	25.5403	0.750185	0.268023	2.79896	0.0051268	0.384979
AP2A1	472.768	-0.05901	0.196245	-0.300696	0.763646	0.999995
AP2A2	226.502	-0.0272649	0.227506	-0.119842	0.904608	0.999995
AP2B1	2127.26	0.0511814	0.0856027	0.597895	0.54991	0.999995
AP2M1	1550.78	0.0251787	0.169714	0.14836	0.882059	0.999995
AP2S1	373.68	0.150114	0.189282	0.79307	0.427737	0.999995
AP3B1	992.184	0.137146	0.115215	1.19034	0.233912	0.999995
AP3B2	3.59088	1.3148	0.843868	1.55806	0.119218
AP3D1	413.282	-0.00455817	0.235124	-0.0193862	0.984533	0.999995
AP3M1	1026.77	0.0523529	0.0993302	0.527059	0.598153	0.999995
AP3M2	267.717	0.0961815	0.118928	0.808734	0.418668	0.999995
AP3S1	1035.73	0.130269	0.399953	0.325711	0.744643	0.999995
AP3S2	148.666	-0.062315	0.196513	-0.317104	0.751165	0.999995
AP4B1	322.251	0.0560741	0.166906	0.335962	0.7369	0.999995
AP4E1	350.261	0.0345317	0.170413	0.202635	0.83942	0.999995
AP4M1	24.0132	-0.142119	0.296813	-0.478816	0.63207	0.999995
AP4S1	153.009	0.0645348	0.208651	0.309296	0.757097	0.999995
AP5B1	1057.43	0.283886	0.289864	0.979377	0.327394	0.999995
AP5M1	1332.66	0.203165	0.230169	0.882678	0.37741	0.999995
AP5S1	37.7463	-0.0422427	0.277306	-0.152333	0.878924	0.999995
AP5Z1	204.787	-0.0528811	0.211634	-0.249871	0.802687	0.999995
APAF1	1815.96	-0.000922456	0.158478	-0.00582073	0.995356	0.999995
APBA1	5.0397	0.608584	0.797855	0.762774	0.445598
APBA2	188.997	-0.786145	0.359794	-2.18499	0.0288899	0.792699
APBA3	103.306	-0.0466469	0.207056	-0.225286	0.821757	0.999995
APBB1	175.803	-0.320798	0.339932	-0.943713	0.345316	0.999995
APBB1IP	2303.84	0.146431	0.23732	0.617021	0.537221	0.999995
APBB2	18.2239	0.576144	0.471321	1.2224	0.221555	0.999995
APBB3	110.997	0.0934904	0.205609	0.454701	0.649325	0.999995
APC	1380.43	0.14069	0.156959	0.896346	0.370068	0.999995
APC2	13.3089	0.055196	0.44973	0.122731	0.90232	0.999995
APCDD1	17.1319	-0.163793	0.495195	-0.330765	0.740822	0.999995
APCDD1L	0.0537838	-0.178956	3.14975	-0.0568159	0.954692
APCS	0
APEH	340.145	-0.134494	0.191092	-0.70382	0.481545	0.999995
APELA	0
APEX1	878.783	0.0329508	0.136829	0.240817	0.809697	0.999995
APEX2	124.994	0.0041677	0.205729	0.0202582	0.983837	0.999995
APH1A	716.351	-0.139368	0.107665	-1.29446	0.195506	0.999995
APH1B	641.881	-0.0531207	0.135315	-0.39257	0.694637	0.999995
API5	1707.45	0.154662	0.136601	1.13221	0.257545	0.999995
APIP	299.301	0.0668485	0.338135	0.197698	0.843282	0.999995
APLF	53.5699	0.122135	0.218598	0.55872	0.576353	0.999995
APLN	0
APLNR	0
APLP1	0.192489	-0.219402	3.14245	-0.0698189	0.944338
APLP2	7155.61	0.0717934	0.13939	0.515055	0.606515	0.999995
APMAP	2121.89	0.0508038	0.324301	0.156656	0.875516	0.999995
APOA1	0.402065	1.61144	2.3214	0.694168	0.487577
APOA2	3.89005	0.736421	0.760603	0.968206	0.332941
APOA4	0
APOA5	0
APOB	0
APOBEC1	0
APOBEC2	7.14609	-0.0686786	0.496227	-0.138401	0.889923
APOBEC3A	1832.37	0.484601	0.2299	2.10788	0.0350414	0.836269
APOBEC3B	8.16017	-0.0108767	0.730069	-0.0148982	0.988113	0.999995
APOBEC3C	615.369	0.0018501	0.193309	0.00957071	0.992364	0.999995
APOBEC3D	11.9817	-0.240736	0.404792	-0.594715	0.552034	0.999995
APOBEC3F	115.425	0.0161143	0.262063	0.0614901	0.950969	0.999995
APOBEC3G	1009.77	0.0231032	0.19708	0.117228	0.90668	0.999995
APOBEC3H	23.712	-0.926182	0.375181	-2.46863	0.0135633	0.59551
APOBEC4	0.650522	-0.914014	2.19834	-0.415774	0.677575
APOBR	1726.18	0.035248	0.210086	0.167778	0.866758	0.999995
APOC1	0
APOC2	0
APOC3	0
APOC4	0
APOC4-APOC2	0
APOD	0.0798014	0.879007	3.14975	0.279072	0.78019
APOE	0.942561	1.4999	1.63997	0.91459	0.360407
APOF	0.8974	-2.01896	1.57849	-1.27904	0.200881
APOH	0.0537838	-0.178956	3.14975	-0.0568159	0.954692
APOL1	668.493	0.289896	0.267919	1.08203	0.279239	0.999995
APOL2	1222.21	0.318122	0.212253	1.49878	0.13393	0.999995
APOL3	792.527	-0.00773216	0.231094	-0.033459	0.973309	0.999995
APOL4	14.6818	0.705438	0.59795	1.17976	0.238095	0.999995
APOL5	0.2143	-1.38389	3.11417	-0.444385	0.656764
APOL6	4138.18	0.471974	0.2285	2.06553	0.0388728	0.871422
APOLD1	45.3195	0.200075	0.351059	0.569919	0.568733	0.999995
APOM	12.3944	0.272773	0.429771	0.634694	0.525628	0.999995
APOO	39.5384	-0.328847	0.305382	-1.07684	0.281554	0.999995
APOOL	137.783	-0.054704	0.229236	-0.238637	0.811387	0.999995
APP	1131.27	0.251763	0.183105	1.37496	0.169143	0.999995
APPBP2	780.624	-0.0200451	0.0910393	-0.22018	0.825731	0.999995
APPL1	873.227	0.0780778	0.120727	0.646728	0.517808	0.999995
APPL2	674.945	0.0177418	0.152165	0.116596	0.90718	0.999995
APRT	403.108	-0.232774	0.206139	-1.12921	0.258809	0.999995
APTX	232.539	-0.090977	0.146253	-0.622053	0.533907	0.999995
AQP1	9.61914	0.683404	0.595136	1.14831	0.250839	0.999995
AQP10	20.0728	0.341145	0.714831	0.477238	0.633193	0.999995
AQP11	18.8834	0.0800431	0.465354	0.172005	0.863434	0.999995
AQP12A	0
AQP12B	0
AQP2	0.137202	-0.178956	3.14975	-0.0568159	0.954692
AQP3	213.093	-0.245187	0.30621	-0.800717	0.423296	0.999995
AQP4	0
AQP5	0.0535053	-0.178956	3.14975	-0.0568159	0.954692
AQP6	0
AQP7	0.432175	-1.42461	1.85712	-0.767108	0.443017
AQP7B	0
AQP8	0
AQP9	15193.6	0.308677	0.468909	0.658288	0.510353	0.999995
AQR	1310.57	0.213058	0.110796	1.92298	0.054483	0.970441
AR	6.19618	0.540098	0.650302	0.830535	0.406236
ARAF	375.642	-0.247303	0.168766	-1.46536	0.142823	0.999995
ARAP1	1593.16	0.157907	0.253244	0.623536	0.532932	0.999995
ARAP2	1469.27	-0.000546432	0.16954	-0.00322303	0.997428	0.999995
ARAP3	444.158	0.175901	0.214833	0.818783	0.41291	0.999995
ARC	0.390244	-0.446074	2.31976	-0.192293	0.847512
ARCN1	1817.88	-0.000465829	0.0913086	-0.0051017	0.995929	0.999995
AREG	4.57685	-1.37737	0.879192	-1.56663	0.1172
AREL1	1439.16	0.0193437	0.160165	0.120773	0.90387	0.999995
ARF1	2680.71	-0.0469389	0.169465	-0.276984	0.781793	0.999995
ARF3	1190.71	0.0154826	0.146051	0.106008	0.915576	0.999995
ARF4	1211.18	0.255814	0.312599	0.818346	0.413159	0.999995
ARF5	434.742	-0.23384	0.242896	-0.962715	0.33569	0.999995
ARF6	2220.25	-0.0432661	0.103257	-0.419013	0.675207	0.999995
ARFGAP1	265.809	-0.174915	0.204132	-0.856874	0.391514	0.999995
ARFGAP2	557	-0.125821	0.169631	-0.741735	0.458248	0.999995
ARFGAP3	1054.16	0.201587	0.290353	0.694282	0.487505	0.999995
ARFGEF1	1664.13	0.0704208	0.095862	0.734606	0.46258	0.999995
ARFGEF2	791.21	0.0176597	0.157435	0.112172	0.910687	0.999995
ARFGEF3	0.803875	-2.53045	1.60186	-1.57969	0.114177
ARFIP1	1276.12	0.0890023	0.326706	0.272423	0.785297	0.999995
ARFIP2	176.879	0.0155463	0.149916	0.103701	0.917407	0.999995
ARFRP1	145.928	-0.0297748	0.16425	-0.181277	0.85615	0.999995
ARG1	303.828	-0.741154	0.605812	-1.2234	0.221177	0.999995
ARG2	14.0925	0.671096	0.440935	1.52199	0.128012	0.999995
ARGFX	0.191562	-0.224109	2.68027	-0.0836142	0.933363
ARGLU1	5984.35	-0.0470099	0.192906	-0.243694	0.807468	0.999995
ARHGAP1	449.64	-0.158584	0.210137	-0.754671	0.450446	0.999995
ARHGAP10	74.5259	-0.282048	0.217545	-1.2965	0.194802	0.999995
ARHGAP11A	39.2426	0.0975906	0.281743	0.346381	0.729056	0.999995
ARHGAP11A-SCG5	5.29798	0.612882	0.597739	1.02533	0.305206
ARHGAP11B	6.93899	-0.0514788	0.566058	-0.0909426	0.927538
ARHGAP12	571.07	0.0888233	0.138497	0.641337	0.521303	0.999995
ARHGAP15	2415.44	0.24267	0.437458	0.554728	0.579081	0.999995
ARHGAP17	313.708	0.103667	0.272854	0.379934	0.703995	0.999995
ARHGAP18	554.932	0.528543	0.396006	1.33469	0.181979	0.999995
ARHGAP19	759.816	0.223284	0.182288	1.2249	0.220614	0.999995
ARHGAP19-SLIT1	0.581012	2.14935	1.60038	1.34303	0.179263
ARHGAP20	4.58001	1.13099	0.791675	1.4286	0.153118
ARHGAP21	444.109	0.176597	0.15906	1.11025	0.266891	0.999995
ARHGAP22	16.6889	0.710169	0.378445	1.87655	0.0605804	0.986364
ARHGAP23	1.11795	0.0155277	1.28894	0.0120469	0.990388
ARHGAP24	120.818	0.82818	0.263409	3.14409	0.00166605	0.231544
ARHGAP25	3535.3	-0.0150998	0.18688	-0.0807992	0.935602	0.999995
ARHGAP26	2774.6	0.28535	0.17649	1.6168	0.105922	0.999995
ARHGAP27	1340.42	-0.0561727	0.185883	-0.302193	0.762505	0.999995
ARHGAP28	0
ARHGAP29	19.4163	0.364647	0.491576	0.741793	0.458213	0.999995
ARHGAP30	4942.11	-0.044238	0.171903	-0.257344	0.796914	0.999995
ARHGAP31	151.153	0.130393	0.26625	0.489741	0.624317	0.999995
ARHGAP32	77.2968	0.239332	0.244187	0.980116	0.327029	0.999995
ARHGAP33	11.0122	-0.221339	0.412648	-0.536387	0.591691	0.999995
ARHGAP35	237.11	-0.17164	0.259415	-0.661643	0.5082	0.999995
ARHGAP36	0
ARHGAP39	0.985439	1.06985	1.44111	0.742382	0.457856
ARHGAP4	880.976	-0.100706	0.185381	-0.543238	0.586966	0.999995
ARHGAP40	0
ARHGAP42	24.3648	0.491999	0.43094	1.14169	0.253584	0.999995
ARHGAP44	4.5477	1.54198	0.765238	2.01503	0.0439011
ARHGAP45	1963.4	-0.191007	0.219197	-0.871395	0.383539	0.999995
ARHGAP5	325.761	0.21805	0.189741	1.1492	0.250474	0.999995
ARHGAP6	56.3384	0.390871	0.409202	0.955205	0.339474	0.999995
ARHGAP8	0.549075	-1.85112	1.76957	-1.04609	0.295521
ARHGAP9	2297.96	0.0781847	0.235994	0.331299	0.740418	0.999995
ARHGDIA	490.164	-0.253454	0.207517	-1.22137	0.221948	0.999995
ARHGDIB	21894.1	0.167549	0.394832	0.424355	0.671307	0.999995
ARHGDIG	0
ARHGEF1	1633.4	-0.236218	0.215464	-1.09632	0.272938	0.999995
ARHGEF10	3.50952	1.78486	1.26905	1.40646	0.159588
ARHGEF10L	96.1174	0.308397	0.328831	0.937858	0.348317	0.999995
ARHGEF11	456.878	0.18003	0.246342	0.730812	0.464894	0.999995
ARHGEF12	658.979	0.355714	0.297859	1.19424	0.232386	0.999995
ARHGEF15	0.0599736	-0.178956	3.14975	-0.0568159	0.954692
ARHGEF16	0.267869	-0.295743	2.46785	-0.119838	0.904611
ARHGEF17	2.2141	-0.233866	0.929221	-0.25168	0.801288
ARHGEF18	781.996	-0.19786	0.253326	-0.781049	0.434774	0.999995
ARHGEF19	26.0321	-0.257109	0.33312	-0.771822	0.44022	0.999995
ARHGEF2	1243.89	-0.032797	0.162141	-0.202275	0.839702	0.999995
ARHGEF25	0.330267	-0.140938	2.42842	-0.0580369	0.953719
ARHGEF26	7.28101	-0.424213	0.566711	-0.748553	0.454127
ARHGEF28	10.8097	-1.71559	0.560243	-3.06222	0.00219699	0.26788
ARHGEF3	1613.47	0.0256082	0.119465	0.214357	0.830268	0.999995
ARHGEF33	2.96542	-0.0514205	0.670143	-0.0767307	0.938838
ARHGEF35	6.94226	-0.244998	0.550899	-0.444724	0.656519
ARHGEF37	7.76732	1.22953	0.672175	1.82918	0.0673729	0.999995
ARHGEF38	5.25339	0.662525	0.569445	1.16346	0.244644
ARHGEF39	22.1744	-0.355559	0.311967	-1.13973	0.254398	0.999995
ARHGEF4	9.74074	-0.531379	0.456328	-1.16447	0.244234	0.999995
ARHGEF40	717.597	0.262453	0.281976	0.930763	0.351976	0.999995
ARHGEF5	14.6764	-0.214017	0.379773	-0.563539	0.573068	0.999995
ARHGEF6	3015.09	0.127791	0.113816	1.12279	0.261527	0.999995
ARHGEF7	581.892	-0.134926	0.197447	-0.683352	0.494384	0.999995
ARHGEF9	265.929	-0.304091	0.224462	-1.35475	0.175496	0.999995
ARID1A	816.866	-0.0459811	0.206872	-0.222269	0.824105	0.999995
ARID1B	508.833	-0.183031	0.128878	-1.42019	0.155554	0.999995
ARID2	744.264	-0.105386	0.0989227	-1.06534	0.286724	0.999995
ARID3A	286.775	-0.0344617	0.242879	-0.141889	0.887168	0.999995
ARID3B	275.069	-0.0132849	0.181357	-0.0732527	0.941605	0.999995
ARID3C	0.246273	-0.621266	2.51847	-0.246684	0.805153
ARID4A	2012.89	0.170712	0.167927	1.01659	0.30935	0.999995
ARID4B	2856.93	0.152455	0.114292	1.33391	0.182235	0.999995
ARID5A	357.551	-0.160958	0.199307	-0.807588	0.419328	0.999995
ARID5B	450.908	0.150128	0.134242	1.11834	0.263423	0.999995
ARIH1	1052.58	-0.0305899	0.0910805	-0.335855	0.73698	0.999995
ARIH2	695.819	-0.152576	0.106742	-1.4294	0.15289	0.999995
ARL1	548.377	0.0467293	0.20656	0.226226	0.821026	0.999995
ARL10	134.969	-0.188122	0.302497	-0.621896	0.53401	0.999995
ARL11	507.553	0.421518	0.309014	1.36407	0.172544	0.999995
ARL13A	8.56007	0.25786	0.46892	0.549902	0.582387	0.999995
ARL13B	156.806	0.0959614	0.144668	0.663321	0.507125	0.999995
ARL14	0.594255	2.63505	2.12344	1.24093	0.21463
ARL14EP	686.929	0.195924	0.236902	0.827025	0.408223	0.999995
ARL14EPL	1.55483	-1.09403	1.067	-1.02533	0.305209
ARL15	371.044	0.0277904	0.231712	0.119935	0.904534	0.999995
ARL16	119.735	-0.184927	0.152409	-1.21336	0.224993	0.999995
ARL17A	56.622	-0.317391	0.370709	-0.856173	0.391902	0.999995
ARL17B	39.1229	-0.133083	0.56985	-0.23354	0.815342	0.999995
ARL2	26.0743	-0.165775	0.276876	-0.598734	0.549351	0.999995
ARL2-SNX15	0
ARL2BP	3.73683	-0.431493	0.680274	-0.634293	0.52589
ARL3	208.079	-0.0323816	0.449333	-0.0720658	0.94255	0.999995
ARL4A	197.116	0.861916	0.397666	2.16744	0.0302016	0.792699
ARL4C	1973.11	-0.425613	0.179681	-2.36871	0.0178504	0.666145
ARL4D	5.44755	0.172328	0.650439	0.264942	0.791054
ARL5A	584.559	0.0476592	0.123051	0.387313	0.698524	0.999995
ARL5B	692.528	0.0501695	0.082237	0.610061	0.541822	0.999995
ARL5C	1.20908	0.592592	1.20376	0.492286	0.622517
ARL6	68.7688	0.0908857	0.195422	0.465074	0.641878	0.999995
ARL6IP1	1848.03	0.0368188	0.307279	0.119822	0.904624	0.999995
ARL6IP4	2.75897	-0.0339159	0.696056	-0.0487258	0.961138
ARL6IP5	4839.66	0.195027	0.256258	0.761056	0.446624	0.999995
ARL6IP6	600.985	-0.0265279	0.21395	-0.123991	0.901322	0.999995
ARL8A	267.689	-0.133081	0.164864	-0.807218	0.419541	0.999995
ARL8B	1156.59	0.162462	0.115602	1.40536	0.159914	0.999995
ARL9	0.680747	-0.718158	1.81426	-0.395841	0.692222
ARMC1	496.182	0.0682408	0.215901	0.316074	0.751946	0.999995
ARMC10	338.122	0.108597	0.147042	0.738543	0.460184	0.999995
ARMC12	4.23249	-0.689167	0.611842	-1.12638	0.260004
ARMC2	94.0421	0.273365	0.159973	1.70881	0.0874855	0.999995
ARMC3	13.1427	0.388187	0.724302	0.535946	0.591996	0.999995
ARMC5	21.2915	-0.109704	0.376719	-0.291209	0.770891	0.999995
ARMC6	82.2661	0.0984498	0.264905	0.371642	0.71016	0.999995
ARMC7	103.955	-0.154801	0.211943	-0.730389	0.465153	0.999995
ARMC8	1001.99	0.194154	0.234042	0.82957	0.406782	0.999995
ARMC9	3.4375	0.267158	0.607684	0.439633	0.660203
ARMCX1	24.9989	0.302502	0.257286	1.17574	0.239699	0.999995
ARMCX2	38.8081	-0.460087	0.283609	-1.62226	0.104748	0.999995
ARMCX3	511.806	0.0354328	0.136202	0.260149	0.794749	0.999995
ARMCX4	72.8185	-0.287874	0.217003	-1.32659	0.184645	0.999995
ARMCX5	114.687	0.0103487	0.165632	0.0624802	0.95018	0.999995
ARMCX5-GPRASP2	0
ARMCX6	173.559	0.0541397	0.294299	0.183961	0.854044	0.999995
ARMH1	85.1712	-0.147095	0.260593	-0.564461	0.57244	0.999995
ARMH2	17.3826	-0.125663	0.331103	-0.379527	0.704297	0.999995
ARMH3	279.688	0.145304	0.16929	0.858312	0.39072	0.999995
ARMH4	0.567917	1.88713	1.80928	1.04303	0.296933
ARMS2	0
ARMT1	832.408	0.15111	0.322548	0.468489	0.639435	0.999995
ARNT	726.62	0.0907873	0.1613	0.562848	0.573538	0.999995
ARNT2	0.43757	1.03157	2.27084	0.454267	0.649637
ARNTL	959.047	-0.0428988	0.19586	-0.219028	0.826629	0.999995
ARNTL2	14.5376	0.463975	0.385968	1.20211	0.229322	0.999995
ARPC1A	63.1453	-0.0491766	0.204721	-0.240213	0.810165	0.999995
ARPC1B	72.4267	0.0954236	0.252268	0.378263	0.705235	0.999995
ARPC2	11598.3	0.185835	0.34201	0.543361	0.586881	0.999995
ARPC3	6146.38	0.191275	0.467582	0.409073	0.682486	0.999995
ARPC4	1150.65	0.0980652	0.233462	0.420049	0.67445	0.999995
ARPC4-TTLL3	0
ARPC5	10476.1	0.135166	0.368978	0.366326	0.714122	0.999995
ARPC5L	313.329	-0.126227	0.15779	-0.799965	0.423731	0.999995
ARPIN	99.3651	0.657057	0.498057	1.31924	0.187089	0.999995
ARPIN-AP3S2	0
ARPP19	2678.51	0.0041907	0.15267	0.0274494	0.978101	0.999995
ARPP21	1.86333	0.342803	1.07001	0.320375	0.748684
ARR3	5.75906	-0.430578	0.56032	-0.768451	0.442219
ARRB1	683.679	-0.190962	0.164029	-1.1642	0.244345	0.999995
ARRB2	3698.54	0.144772	0.214337	0.675438	0.499397	0.999995
ARRDC1	164.71	-0.276469	0.224193	-1.23317	0.217511	0.999995
ARRDC2	369.156	-0.112382	0.16119	-0.697199	0.485678	0.999995
ARRDC3	7448.77	0.223171	0.462349	0.482689	0.629317	0.999995
ARRDC4	475.83	-0.455996	0.20959	-2.17566	0.029581	0.792699
ARRDC5	12.6405	-0.00489087	0.418839	-0.0116772	0.990683	0.999995
ARSA	347.699	0.0434338	0.18667	0.232677	0.816012	0.999995
ARSB	223.829	0.0357279	0.234388	0.152431	0.878847	0.999995
ARSD	156.98	0.0976197	0.302066	0.323173	0.746564	0.999995
ARSF	0.137778	0.301937	3.14975	0.0958607	0.923631
ARSG	210.144	-0.15841	0.127909	-1.23846	0.215546	0.999995
ARSH	0.248017	0.879007	3.14975	0.279072	0.78019
ARSI	0.0599736	-0.178956	3.14975	-0.0568159	0.954692
ARSJ	1.82185	-0.262972	1.15342	-0.227993	0.819652
ARSK	84.6746	0.0131158	0.199732	0.0656669	0.947643	0.999995
ARSL	0.774993	-0.808499	1.68328	-0.480313	0.631005
ART1	0.0842727	0.879007	3.14975	0.279072	0.78019
ART3	0
ART4	2.36711	2.71229	1.38513	1.95814	0.0502133
ART5	0.137202	-0.178956	3.14975	-0.0568159	0.954692
ARTN	0.254957	-0.663447	2.09429	-0.316789	0.751404
ARV1	133.704	-0.00332229	0.268854	-0.0123572	0.990141	0.999995
ARVCF	12.3928	-0.785271	0.450727	-1.74223	0.0814682	0.999995
ARX	0.0599736	-0.178956	3.14975	-0.0568159	0.954692
AS3MT	5.16882	0.0534099	0.584188	0.0914258	0.927154
ASAH1	8276.43	0.234556	0.29913	0.784127	0.432966	0.999995
ASAH2	10.686	-0.619529	0.446054	-1.38891	0.16486	0.999995
ASAH2B	41.5578	-0.197342	0.293378	-0.672653	0.501168	0.999995
ASAP1	1539.67	0.245221	0.223203	1.09865	0.271922	0.999995
ASAP2	17.9016	-0.146484	0.364644	-0.401719	0.687891	0.999995
ASAP3	3.67947	-0.829506	0.669511	-1.23897	0.215356
ASB1	248.049	-0.400052	0.24759	-1.61579	0.106141	0.999995
ASB10	0
ASB11	0.153393	0.301937	3.14975	0.0958607	0.923631
ASB12	1.77293	1.08438	0.974021	1.1133	0.265579
ASB13	58.2014	-0.114943	0.309616	-0.371245	0.710455	0.999995
ASB14	25.9888	0.248206	0.312191	0.795045	0.426587	0.999995
ASB15	0.0537838	-0.178956	3.14975	-0.0568159	0.954692
ASB16	14.4255	0.0967497	0.370569	0.261084	0.794028	0.999995
ASB17	0
ASB18	0
ASB2	28.5293	-0.152141	0.286762	-0.530549	0.595731	0.999995
ASB3	228.498	0.0574026	0.1934	0.296807	0.766614	0.999995
ASB4	0
ASB5	0.107568	-0.704479	3.14224	-0.224197	0.822604
ASB6	128.189	-0.0934089	0.18152	-0.514592	0.606838	0.999995
ASB7	450.26	0.122433	0.163142	0.750472	0.452971	0.999995
ASB8	846.247	0.133002	0.250295	0.531381	0.595155	0.999995
ASB9	2.53066	-0.498155	0.777993	-0.640308	0.521972
ASCC1	275.683	0.053305	0.200135	0.266346	0.789973	0.999995
ASCC2	1128.17	0.326861	0.256684	1.2734	0.202876	0.999995
ASCC3	544.331	0.153242	0.111309	1.37673	0.168596	0.999995
ASCL1	0
ASCL2	47.7854	-0.757492	0.345405	-2.19305	0.0283037	0.78328
ASCL3	0.228893	0.782831	3.14975	0.248537	0.803719
ASCL4	0.633857	0.535558	1.85859	0.288153	0.77323
ASCL5	0.692698	-0.849412	1.86686	-0.454994	0.649114
ASDURF	0
ASF1A	565.27	0.0758698	0.24599	0.308426	0.757758	0.999995
ASF1B	99.3556	-0.465654	0.331853	-1.40319	0.160559	0.999995
ASGR1	61.1589	0.181869	0.321423	0.565827	0.571512	0.999995
ASGR2	87.7515	0.186691	0.254516	0.733512	0.463246	0.999995
ASH1L	1356.99	0.00757062	0.149689	0.0505756	0.959664	0.999995
ASH2L	607.597	0.0588323	0.153568	0.383104	0.701643	0.999995
ASIC1	5.68343	-1.39039	0.895722	-1.55226	0.120601
ASIC2	0
ASIC3	4.5206	0.0213444	0.58302	0.0366101	0.970796
ASIC4	0.178898	1.3599	3.14975	0.431748	0.665924
ASIC5	0
ASIP	1.93521	-0.168244	1.26151	-0.133367	0.893904
ASL	60.5404	-0.270469	0.181719	-1.48839	0.136649	0.999995
ASMT	1.96212	-0.280963	0.971644	-0.289163	0.772457
ASMTL	116.405	-0.269374	0.180343	-1.49368	0.135261	0.999995
ASNS	18.6205	-0.328323	0.333439	-0.984658	0.324792	0.999995
ASNSD1	307.844	0.202709	0.384059	0.527808	0.597633	0.999995
ASPA	0
ASPDH	3.18916	-1.34048	0.954617	-1.40421	0.160256
ASPG	0.0854785	0.879007	3.14975	0.279072	0.78019
ASPH	636.179	0.313035	0.297645	1.05171	0.292935	0.999995
ASPHD1	0.0876938	0.879007	3.14975	0.279072	0.78019
ASPHD2	12.8547	-0.41228	0.463908	-0.888711	0.374158	0.999995
ASPM	34.0927	0.394473	0.399366	0.987748	0.323276	0.999995
ASPN	0.394942	0.78284	2.30354	0.339842	0.733975
ASPRV1	0
ASPSCR1	55.5908	-0.0820953	0.246641	-0.332853	0.739245	0.999995
ASRGL1	33.481	0.101025	0.275312	0.366948	0.713658	0.999995
ASS1	0.461384	0.174557	2.26124	0.0771952	0.938468
ASTE1	287.229	0.0862525	0.248813	0.346655	0.72885	0.999995
ASTL	2.02445	-0.891577	0.964993	-0.923921	0.355527
ASTN1	0
ASTN2	12.9645	-0.25282	0.387251	-0.652858	0.513848	0.999995
ASXL1	710.428	-0.239182	0.179669	-1.33124	0.183111	0.999995
ASXL2	1178.2	0.0239825	0.0919171	0.260915	0.794158	0.999995
ASXL3	0.665435	0.371755	1.52544	0.243704	0.80746
ASZ1	0
ATAD1	1027.42	0.083658	0.231814	0.360884	0.718186	0.999995
ATAD2	344.171	0.192009	0.147015	1.30605	0.191537	0.999995
ATAD2B	694.726	0.0669994	0.144265	0.464417	0.642349	0.999995
ATAD3A	28.8846	-0.248782	0.311139	-0.799585	0.423951	0.999995
ATAD3B	82.3985	-0.254088	0.248688	-1.02171	0.306917	0.999995
ATAD3C	2.80733	-0.298561	0.749687	-0.398248	0.690447
ATAD5	121.868	-0.119363	0.289648	-0.412097	0.680269	0.999995
ATAT1	50.2489	-0.151393	0.251976	-0.600822	0.547959	0.999995
ATCAY	0
ATE1	496.417	-0.0288778	0.164865	-0.17516	0.860954	0.999995
ATF1	540.565	-0.0503012	0.238473	-0.210931	0.832941	0.999995
ATF2	1246.47	0.0944553	0.232492	0.406273	0.684542	0.999995
ATF3	16.5815	0.833674	0.460527	1.81026	0.0702556	0.999995
ATF4	1603	-0.0687405	0.186156	-0.369263	0.711932	0.999995
ATF5	47.9457	0.473066	0.308652	1.53269	0.125353	0.999995
ATF6	2595.76	0.267672	0.269439	0.993442	0.320495	0.999995
ATF6B	532.353	-0.128997	0.206786	-0.62382	0.532746	0.999995
ATF7	203.869	0.0395096	0.239244	0.165144	0.868831	0.999995
ATF7-NPFF	0
ATF7IP	2677.16	0.0170358	0.111806	0.15237	0.878895	0.999995
ATF7IP2	319.037	0.0409712	0.15863	0.258281	0.79619	0.999995
ATG10	54.4775	0.378147	0.277279	1.36378	0.172637	0.999995
ATG101	55.6245	0.00468894	0.252581	0.0185641	0.985189	0.999995
ATG12	1434.12	0.049123	0.0743917	0.660329	0.509043	0.999995
ATG13	733.965	-0.0155835	0.123863	-0.125813	0.89988	0.999995
ATG14	282.462	0.0305636	0.124441	0.245606	0.805987	0.999995
ATG16L1	440.598	-0.133083	0.0966985	-1.37627	0.168739	0.999995
ATG16L2	3338.73	0.0812177	0.214374	0.37886	0.704792	0.999995
ATG2A	235.182	-0.13658	0.259823	-0.525664	0.599122	0.999995
ATG2B	1125.44	-0.0988441	0.138239	-0.715024	0.474594	0.999995
ATG3	1763.93	0.380329	0.316249	1.20263	0.229121	0.999995
ATG4A	236.03	-0.0272791	0.213597	-0.127713	0.898376	0.999995
ATG4B	303.625	-0.232653	0.17111	-1.35967	0.173935	0.999995
ATG4C	389.111	0.42604	0.235792	1.80685	0.0707855	0.999995
ATG4D	80.4175	-0.198403	0.220825	-0.898464	0.368938	0.999995
ATG5	547.914	0.0396304	0.240637	0.16469	0.869188	0.999995
ATG7	387.13	0.0840136	0.134361	0.625281	0.531787	0.999995
ATG9A	122.981	-0.119322	0.212464	-0.561609	0.574382	0.999995
ATG9B	13.6253	-0.0720003	0.436692	-0.164877	0.869041	0.999995
ATIC	458.327	0.0178446	0.145707	0.12247	0.902527	0.999995
ATL1	37.9033	-0.349769	0.287937	-1.21474	0.224465	0.999995
ATL2	673.422	-0.0563996	0.172418	-0.327109	0.743586	0.999995
ATL3	1054.36	0.0139804	0.0851358	0.164213	0.869564	0.999995
ATM	6675.88	-0.0522771	0.232062	-0.225272	0.821768	0.999995
ATMIN	679.752	0.0280729	0.101234	0.277308	0.781544	0.999995
ATN1	56.2155	-0.416729	0.333669	-1.24893	0.211691	0.999995
ATOH1	0
ATOH7	0.20422	-0.312203	3.13788	-0.0994947	0.920746
ATOH8	7.46671	0.711582	0.714171	0.996374	0.319068
ATOX1	130.052	-0.00152642	0.140975	-0.0108276	0.991361	0.999995
ATP10A	155.243	-0.487033	0.327342	-1.48784	0.136793	0.999995
ATP10B	0.527744	-0.251586	1.85985	-0.135272	0.892397
ATP10D	505.66	0.35928	0.164904	2.17873	0.0293521	0.792699
ATP11A	913.679	-0.0491591	0.181287	-0.271167	0.786263	0.999995
ATP11B	2956.05	0.102678	0.162325	0.632548	0.527029	0.999995
ATP11C	539.292	-0.0452755	0.120332	-0.376255	0.706727	0.999995
ATP12A	0
ATP13A1	206.657	-0.116741	0.281761	-0.414325	0.678636	0.999995
ATP13A2	83.5107	-0.0924612	0.320839	-0.288186	0.773204	0.999995
ATP13A3	1268.27	-0.0154508	0.101779	-0.151807	0.879339	0.999995
ATP13A4	30.4231	0.482893	0.371734	1.29903	0.193934	0.999995
ATP13A5	0.750108	-0.137132	1.92526	-0.0712279	0.943216
ATP1A1	724.676	-0.303518	0.247928	-1.22422	0.22087	0.999995
ATP1A2	0.221475	0.301937	3.14975	0.0958607	0.923631
ATP1A3	1.29104	0.6865	1.22219	0.561695	0.574324
ATP1A4	8.89564	-0.391478	0.648726	-0.603456	0.546205	0.999995
ATP1B1	47.0333	0.446625	0.226054	1.97574	0.0481839	0.938526
ATP1B2	2.11326	2.3576	1.88762	1.24898
ATP1B3	521.549	0.0868769	0.141849	0.612462	0.540232	0.999995
ATP1B4	0.133307	0.301937	3.14975	0.0958607	0.923631
ATP23	58.4715	-0.26387	0.323198	-0.816433	0.414253	0.999995
ATP2A1	7.48972	-0.00395241	0.480633	-0.00822334	0.993439
ATP2A2	683.079	-0.157572	0.301222	-0.523111	0.600897	0.999995
ATP2A3	1367.22	-0.225558	0.190234	-1.18569	0.235746	0.999995
ATP2B1	3457.8	0.281932	0.14739	1.91283	0.0557695	0.971197
ATP2B2	1.47729	-0.73199	0.966986	-0.756981	0.449061
ATP2B3	0.141199	0.301937	3.14975	0.0958607	0.923631
ATP2B4	2522.1	-0.105766	0.148374	-0.712835	0.475948	0.999995
ATP2C1	869.828	0.0230443	0.117699	0.19579	0.844775	0.999995
ATP2C2	5.23904	-0.565269	0.678224	-0.833456	0.404588
ATP4A	0.119947	-0.793096	3.13788	-0.252749	0.800462
ATP4B	0
ATP5F1A	3829.39	0.147439	0.218145	0.675878	0.499118	0.999995
ATP5F1B	3248.13	0.119226	0.116809	1.02069	0.307401	0.999995
ATP5F1C	1243.22	0.139177	0.300481	0.46318	0.643235	0.999995
ATP5F1D	123.183	-0.0438149	0.191548	-0.228741	0.81907	0.999995
ATP5F1E	4265.26	0.434794	0.583595	0.745026	0.456256	0.999995
ATP5IF1	227.868	-0.0773626	0.131605	-0.587839	0.556641	0.999995
ATP5MC1	184.349	-0.0394618	0.238086	-0.165746	0.868357	0.999995
ATP5MC2	947.465	0.0910159	0.277775	0.327661	0.743168	0.999995
ATP5MC3	645.954	0.0863149	0.310887	0.277641	0.781288	0.999995
ATP5ME	4.32774	-1.0183	0.691028	-1.47361	0.140588
ATP5MF	59.6814	-0.336793	0.250672	-1.34356	0.179091	0.999995
ATP5MF-PTCD1	0.268919	-1.62	3.1069	-0.521421	0.602074
ATP5MG	399.286	0.00911191	0.325476	0.0279956	0.977666	0.999995
ATP5MGL	0.168545	1.3599	3.14975	0.431748	0.665924
ATP5MJ	735.561	0.0815673	0.398611	0.204629	0.837862	0.999995
ATP5MK	422.558	-0.0496351	0.434987	-0.114107	0.909153	0.999995
ATP5PB	1894.02	0.155598	0.306535	0.507603	0.611732	0.999995
ATP5PD	207.037	0.144788	0.283468	0.510771	0.609511	0.999995
ATP5PF	312.937	0.198311	0.370216	0.535662	0.592192	0.999995
ATP5PO	62.0245	-0.00659703	0.281214	-0.0234592	0.981284	0.999995
ATP6AP1	742.443	-0.151884	0.189807	-0.800202	0.423594	0.999995
ATP6AP2	3594.89	0.175845	0.246864	0.712315	0.47627	0.999995
ATP6V0A1	475.288	0.169895	0.217346	0.781682	0.434401	0.999995
ATP6V0A2	501.254	-0.237217	0.182516	-1.29971	0.193702	0.999995
ATP6V0A4	0.0842727	0.879007	3.14975	0.279072	0.78019
ATP6V0B	1945.56	-0.0708673	0.270556	-0.261932	0.793374	0.999995
ATP6V0C	4.65061	0.321911	0.615668	0.522865	0.601068
ATP6V0D1	992.648	0.011177	0.208339	0.053648	0.957216	0.999995
ATP6V0D2	0
ATP6V0E1	3079.18	0.166537	0.433826	0.38388	0.701068	0.999995
ATP6V0E2	95.4983	-0.634578	0.251749	-2.52068	0.0117128	0.559082
ATP6V1A	3487.75	0.196664	0.256896	0.765539	0.443951	0.999995
ATP6V1B1	0
ATP6V1B2	9475.65	0.145824	0.259344	0.562279	0.573926	0.999995
ATP6V1C1	1420.18	0.330651	0.30964	1.06786	0.285586	0.999995
ATP6V1C2	7.33549	0.025805	0.454274	0.0568049	0.954701
ATP6V1D	953.51	0.352526	0.39151	0.900428	0.367893	0.999995
ATP6V1E1	1726.26	0.169994	0.402989	0.421834	0.673146	0.999995
ATP6V1E2	48.2353	0.114467	0.275563	0.415392	0.677855	0.999995
ATP6V1F	230.225	0.157095	0.404257	0.388601	0.697571	0.999995
ATP6V1FNB	2.40299	-0.14107	0.783456	-0.180062	0.857104
ATP6V1G1	2118.72	0.254397	0.375672	0.677178	0.498293	0.999995
ATP6V1G2	9.90121	0.130464	0.426859	0.305638	0.759881	0.999995
ATP6V1G2-DDX39B	0
ATP6V1G3	0
ATP6V1H	216.7	-0.0466248	0.131982	-0.353266	0.723889	0.999995
ATP7A	994.965	0.233371	0.149299	1.56311	0.118027	0.999995
ATP7B	23.5622	0.127405	0.462541	0.275445	0.782974	0.999995
ATP8A1	1679.59	-0.0277223	0.124424	-0.222805	0.823687	0.999995
ATP8A2	27.8478	-0.450187	0.465281	-0.967559	0.333265	0.999995
ATP8B1	31.3316	0.191666	0.358967	0.533939	0.593384	0.999995
ATP8B2	765.015	-0.243762	0.283487	-0.85987	0.389861	0.999995
ATP8B3	19.5379	-0.594277	0.329826	-1.80179	0.0715781	0.999995
ATP8B4	399.804	0.286632	0.181371	1.58036	0.114024	0.999995
ATP9A	103.799	0.289647	0.416689	0.695115	0.486983	0.999995
ATP9B	182.741	-0.124548	0.165072	-0.754509	0.450544	0.999995
ATPAF1	310.574	0.00302314	0.111543	0.0271028	0.978378	0.999995
ATPAF2	67.5726	-0.288842	0.207754	-1.39031	0.164435	0.999995
ATPSCKMT	113.882	0.20698	0.224061	0.923767	0.355608	0.999995
ATR	807.721	0.0678182	0.167603	0.404637	0.685744	0.999995
ATRAID	353.899	-0.000294039	0.283019	-0.00103894	0.999171	0.999995
ATRIP	62.3866	-0.0994567	0.255086	-0.389894	0.696615	0.999995
ATRN	376.447	-0.0216927	0.234123	-0.0926552	0.926177	0.999995
ATRNL1	0.784251	1.75852	1.56058	1.12684	0.259809
ATRX	2500.56	0.220441	0.138443	1.59229	0.111321	0.999995
ATXN1	1418.59	0.110196	0.181735	0.606352	0.544281	0.999995
ATXN10	583.093	0.135285	0.187436	0.721765	0.470439	0.999995
ATXN1L	471.429	-0.147184	0.157622	-0.933783	0.350416	0.999995
ATXN2	261.346	-0.0794031	0.201103	-0.394838	0.692963	0.999995
ATXN2L	314.907	-0.167605	0.273233	-0.613414	0.539603	0.999995
ATXN3	567.427	-0.00308436	0.116746	-0.0264195	0.978923	0.999995
ATXN3L	0
ATXN7	1629.48	0.191548	0.156146	1.22672	0.219927	0.999995
ATXN7L1	177.486	-0.0615741	0.230254	-0.267418	0.789148	0.999995
ATXN7L2	34.7533	-0.282566	0.304318	-0.928523	0.353137	0.999995
ATXN7L3	553.142	-0.132778	0.17994	-0.737899	0.460576	0.999995
ATXN7L3B	1093.03	-0.115137	0.11162	-1.0315	0.302304	0.999995
AUH	141.188	-0.0278091	0.134848	-0.206225	0.836615	0.999995
AUNIP	4.23915	1.31218	0.583034	2.25061	0.0244103
AUP1	551.003	-0.102356	0.165106	-0.619937	0.535299	0.999995
AURKA	34.6226	-0.223395	0.391605	-0.570461	0.568365	0.999995
AURKAIP1	252.799	-0.114877	0.21567	-0.532653	0.594274	0.999995
AURKB	8.74949	-0.559661	0.496379	-1.12749	0.259537	0.999995
AURKC	4.62723	0.0588462	0.796022	0.0739253	0.94107
AUTS2	112.612	-0.374616	0.325193	-1.15198	0.249329	0.999995
AVEN	41.0803	-0.0568174	0.253485	-0.224145	0.822645	0.999995
AVIL	267.426	0.404651	0.277597	1.45769	0.144925	0.999995
AVL9	1102.2	0.0282333	0.117156	0.240988	0.809564	0.999995
AVP	0
AVPI1	8.8695	-0.0804971	0.545583	-0.147543	0.882703	0.999995
AVPR1A	28.9078	0.643612	0.546223	1.1783	0.238679	0.999995
AVPR1B	0.576141	0.507214	1.50748	0.336464	0.736521
AVPR2	1.38129	-0.237567	0.983091	-0.241653	0.809049
AWAT1	0.396863	1.24954	2.27916	0.548246	0.583523
AWAT2	0
AXDND1	0.326566	1.27074	2.02562	0.627333	0.530441
AXIN1	288.451	-0.503747	0.217878	-2.31206	0.0207745	0.706736
AXIN2	47.4265	-0.290572	0.301356	-0.964217	0.334937	0.999995
AXL	5.23921	0.770533	0.741535	1.0391	0.298756
AZGP1	0.160516	-1.0915	3.12483	-0.349299	0.726865
AZI2	258.486	0.224168	0.137922	1.62532	0.104094	0.999995
AZIN1	1899.67	0.0198197	0.236543	0.0837889	0.933224	0.999995
AZIN2	26.3032	0.184506	0.401392	0.459665	0.645757	0.999995
AZU1	15.9412	-0.674891	0.68356	-0.987319	0.323486	0.999995
B2M	214772	0.117203	0.45473	0.257742	0.796606	0.999995
B3GALNT1	15.3157	0.469382	0.39257	1.19567	0.231827	0.999995
B3GALNT2	102.335	-0.201799	0.280398	-0.719687	0.471718	0.999995
B3GALT1	0
B3GALT2	83.2778	0.143799	0.473163	0.303909	0.761197	0.999995
B3GALT4	94.9786	-0.186411	0.186115	-1.00159	0.316543	0.999995
B3GALT5	0
B3GALT6	81.5716	-0.173903	0.238997	-0.727639	0.466834	0.999995
B3GALT9	40.1247	0.0243721	0.213029	0.114408	0.908915	0.999995
B3GAT1	89.2694	-1.02337	0.54819	-1.86681	0.0619283	0.989512
B3GAT2	28.0556	-0.145327	0.308914	-0.470446	0.638036	0.999995
B3GAT3	144.209	-0.153203	0.228254	-0.671194	0.502097	0.999995
B3GLCT	118.085	0.152062	0.175124	0.868312	0.385224	0.999995
B3GNT2	735.445	-0.00986565	0.225296	-0.0437897	0.965072	0.999995
B3GNT3	0.702664	0.379309	1.64972	0.229922	0.818152
B3GNT4	2.89042	0.828863	0.804817	1.02988	0.303067
B3GNT5	325.92	0.23043	0.414761	0.555574	0.578502	0.999995
B3GNT6	0
B3GNT7	12.6253	-0.241745	0.459141	-0.526516	0.59853	0.999995
B3GNT8	118.531	0.0908054	0.327605	0.277179	0.781642	0.999995
B3GNT9	14.4737	0.336962	0.431978	0.780046	0.435364	0.999995
B3GNTL1	220.277	-0.0197887	0.183881	-0.107617	0.9143	0.999995
B4GALNT1	0
B4GALNT2	0.0537838	-0.178956	3.14975	-0.0568159	0.954692
B4GALNT3	32.8253	-0.0414336	0.716926	-0.0577934	0.953913	0.999995
B4GALNT4	2.24637	-0.208907	0.837322	-0.249494	0.802978
B4GALT1	1178	-0.254845	0.166961	-1.52638	0.126916	0.999995
B4GALT2	9.38399	-0.0294778	0.405912	-0.072621	0.942108	0.999995
B4GALT3	282.079	-0.135091	0.177394	-0.761528	0.446342	0.999995
B4GALT4	285.456	-0.341165	0.151671	-2.24938	0.0244886	0.735735
B4GALT5	1705.94	0.0296142	0.26798	0.110509	0.912006	0.999995
B4GALT6	83.1026	-0.0999181	0.3339	-0.299245	0.764753	0.999995
B4GALT7	67.499	0.06133	0.228128	0.268841	0.788052	0.999995
B4GAT1	30.4449	-0.13863	0.226814	-0.611207	0.541063	0.999995
B9D1	6.1571	-0.358582	0.590956	-0.606782	0.543996
B9D2	69.0042	0.146247	0.317303	0.460906	0.644866	0.999995
BAALC	2.72401	0.195896	0.965434	0.20291	0.839205
BAAT	2.34054	0.606963	0.915899	0.662697	0.507525
BABAM1	78.2625	0.0522824	0.24857	0.210333	0.833408	0.999995
BABAM2	216.447	0.303093	0.155899	1.94417	0.0518754	0.958
BACE1	37.5263	0.19043	0.373357	0.510048	0.610018	0.999995
BACE2	100.22	-0.0028316	0.262639	-0.0107814	0.991398	0.999995
BACH1	8326.9	0.380568	0.376878	1.00979	0.312595	0.999995
BACH2	495.362	-0.189272	0.204096	-0.927365	0.353737	0.999995
BAD	11.492	-0.434111	0.468172	-0.927247	0.353799	0.999995
BAG1	2275.67	0.155244	0.412386	0.376454	0.706579	0.999995
BAG2	89.3379	-0.0265621	0.302141	-0.0879131	0.929946	0.999995
BAG3	38.8037	-0.731554	0.297422	-2.45965	0.0139074	0.596759
BAG4	481.596	0.0611848	0.163292	0.374696	0.707887	0.999995
BAG5	620.966	0.0134251	0.113712	0.118062	0.906018	0.999995
BAG6	1030.82	0.164687	0.245322	0.671309	0.502024	0.999995
BAHCC1	12.0759	1.06452	0.435623	2.44367	0.0145387	0.609062
BAHD1	113.04	-0.444878	0.189341	-2.34961	0.0187929	0.674738
BAIAP2	20.0488	0.117552	0.427118	0.275221	0.783147	0.999995
BAIAP2L1	7.80594	-0.739012	0.562182	-1.31454	0.188663	0.999995
BAIAP2L2	5.04764	-0.729679	0.609374	-1.19742	0.231142
BAIAP3	40.2881	0.429391	0.33086	1.2978	0.194354	0.999995
BAK1	198.564	0.0854279	0.192422	0.443962	0.65707	0.999995
BAMBI	3.68287	0.5571	0.696589	0.799754	0.423853
BANF1	351.57	0.0413787	0.157033	0.263503	0.792163	0.999995
BANF2	0
BANK1	986.851	0.622431	0.138352	4.4989	6.83059e-06	0.0105505
BANP	221.632	-0.114601	0.175706	-0.652232	0.514251	0.999995
BAP1	368.507	-0.216526	0.160795	-1.3466	0.17811	0.999995
BARD1	158.695	0.266253	0.18252	1.45876	0.14463	0.999995
BARHL1	0
BARHL2	0
BARX1	0
BARX2	0.0934196	0.879007	3.14975	0.279072	0.78019
BASP1	4571.1	0.146872	0.457044	0.321352	0.747943	0.999995
BATF	167.038	-0.00613853	0.296306	-0.0207169	0.983472	0.999995
BATF2	51.4497	0.683196	0.507817	1.34536	0.17851	0.999995
BATF3	22.9023	0.311446	0.393989	0.790494	0.429239	0.999995
BAX	306.905	0.103658	0.136827	0.757582	0.448701	0.999995
BAZ1A	4553.51	0.393639	0.239655	1.64252	0.100482	0.999995
BAZ1B	701.511	-0.114648	0.221714	-0.5171	0.605087	0.999995
BAZ2A	1269.35	0.0149283	0.20636	0.0723413	0.94233	0.999995
BAZ2B	2921.46	0.439968	0.172448	2.55131	0.0107319	0.537251
BBC3	95.1692	-0.345348	0.255511	-1.3516	0.176504	0.999995
BBIP1	815.691	0.0861282	0.119756	0.719198	0.472019	0.999995
BBLN	165.167	-0.267451	0.307136	-0.870791	0.383868	0.999995
BBOF1	255.63	0.988538	0.914253	1.08125	0.279585	0.999995
BBOX1	0
BBS1	7.1982	-0.316032	0.434807	-0.726832	0.467329
BBS10	440.484	0.062968	0.150462	0.418498	0.675583	0.999995
BBS12	57.4446	0.266725	0.315783	0.844646	0.398309	0.999995
BBS2	241.009	-0.121729	0.224905	-0.541247	0.588337	0.999995
BBS4	172.996	-0.0882229	0.151877	-0.580883	0.561319	0.999995
BBS5	6.53943	-0.857709	0.49303	-1.73967	0.0819172
BBS7	151.802	0.253039	0.181167	1.39672	0.162499	0.999995
BBS9	133.903	-0.121182	0.177645	-0.682157	0.49514	0.999995
BBX	1252.85	0.152851	0.0906024	1.68705	0.0915943	0.999995
BCAM	7.52662	2.56106	1.15293	2.22135	0.0263276	0.759065
BCAN	0.482174	1.04088	2.23698	0.465307	0.641712
BCAP29	11.9902	-0.0150393	0.378953	-0.0396863	0.968343	0.999995
BCAP31	1203.84	-0.106746	0.277643	-0.384473	0.700628	0.999995
BCAR1	0.113479	-0.747427	3.1401	-0.238027	0.81186
BCAR3	14.6423	0.915555	0.355585	2.57478	0.0100303	0.534731
BCAS1	32.4056	0.212443	0.419726	0.506147	0.612753	0.999995
BCAS2	451.777	0.0959525	0.360876	0.265888	0.790326	0.999995
BCAS3	207.183	0.0873036	0.152129	0.573881	0.566049	0.999995
BCAS4	52.0624	-0.0523	0.271948	-0.192316	0.847495	0.999995
BCAT1	155.074	0.260517	0.297404	0.875971	0.381046	0.999995
BCAT2	54.7013	0.0618706	0.256847	0.240885	0.809644	0.999995
BCCIP	460.669	0.170831	0.26499	0.644669	0.519142	0.999995
BCDIN3D	54.6468	-0.191382	0.261803	-0.731018	0.464768	0.999995
BCHE	0.170957	1.3599	3.14975	0.431748	0.665924
BCKDHA	0.926731	0.471444	1.20533	0.391133	0.695699
BCKDHB	125.513	0.0223017	0.192228	0.116017	0.907639	0.999995
BCKDK	206.556	-0.115101	0.147116	-0.782383	0.43399	0.999995
BCL10	620.424	0.0922597	0.187003	0.493359	0.621759	0.999995
BCL11A	214.156	0.454641	0.178662	2.54471	0.010937	0.542496
BCL11B	1192.35	-0.250561	0.203023	-1.23415	0.217147	0.999995
BCL2	1150.25	-0.200998	0.17362	-1.15769	0.246989	0.999995
BCL2A1	1998.99	0.273656	0.590705	0.463271	0.64317	0.999995
BCL2L1	1143.72	0.934372	0.360469	2.5921	0.00953918	0.522111
BCL2L10	0.446371	0.0486461	2.33767	0.0208096	0.983398
BCL2L11	775.339	0.025997	0.257012	0.101151	0.919431	0.999995
BCL2L12	58.8933	-0.172143	0.208104	-0.827198	0.408125	0.999995
BCL2L13	487.012	0.17295	0.106528	1.62351	0.10448	0.999995
BCL2L14	2.45363	-0.320171	0.778432	-0.411303	0.680851
BCL2L15	39.2861	-0.125518	0.238165	-0.527022	0.598178	0.999995
BCL2L2	87.4864	-0.0297803	0.183154	-0.162597	0.870836	0.999995
BCL2L2-PABPN1	0.0934196	0.879007	3.14975	0.279072	0.78019
BCL3	278.762	-0.0823983	0.363213	-0.226859	0.820533	0.999995
BCL6	4094.68	0.41188	0.28503	1.44504	0.148446	0.999995
BCL6B	0.682896	-0.223147	1.39506	-0.159955	0.872917
BCL7A	56.862	0.041177	0.27236	0.151186	0.879829	0.999995
BCL7B	226.484	-0.192842	0.160791	-1.19933	0.230399	0.999995
BCL7C	36.4042	-0.251395	0.219826	-1.14361	0.252787	0.999995
BCL9	58.6174	-0.208219	0.212771	-0.978609	0.327773	0.999995
BCL9L	187.352	-0.835573	0.501375	-1.66656	0.0956014	0.999995
BCLAF1	5602.06	0.129119	0.132046	0.977834	0.328156	0.999995
BCLAF3	531.236	0.0574845	0.16481	0.348792	0.727245	0.999995
BCO1	0
BCO2	24.313	-0.158927	0.334854	-0.474617	0.63506	0.999995
BCOR	266.746	-0.137253	0.175384	-0.782584	0.433871	0.999995
BCORL1	82.4966	-0.231396	0.249647	-0.926894	0.353981	0.999995
BCR	198.657	-0.353916	0.205027	-1.72619	0.0843131	0.999995
BCS1L	113.511	-0.0706794	0.265699	-0.266012	0.79023	0.999995
BDH1	76.4011	-0.127384	0.244755	-0.520455	0.602747	0.999995
BDH2	106.814	-0.168177	0.25305	-0.664603	0.506305	0.999995
BDKRB1	0
BDKRB2	0.0934196	0.879007	3.14975	0.279072	0.78019
BDNF	1.27883	-0.0843015	1.25965	-0.0669247	0.946642
BDP1	965.175	-0.00883588	0.167658	-0.0527017	0.95797	0.999995
BEAN1	12.9817	0.59683	0.46101	1.29461	0.195453	0.999995
BECN1	780.896	0.0565875	0.165574	0.341767	0.732526	0.999995
BECN2	0
BEGAIN	4.5405	0.684905	1.23319	0.555391	0.578627
BEND2	247.593	0.0945548	0.860182	0.109924	0.91247	0.999995
BEND3	9.26282	0.254296	0.409277	0.621331	0.534382	0.999995
BEND4	46.6067	0.327271	0.223903	1.46166	0.143833	0.999995
BEND5	23.7239	0.116339	0.483723	0.240508	0.809936	0.999995
BEND6	3.38562	2.06074	0.797998	2.58239	0.00981195
BEND7	43.7799	0.0843643	0.419168	0.201266	0.840491	0.999995
BEST1	569.521	-0.0219152	0.198311	-0.110509	0.912006	0.999995
BEST2	1.22269	2.88142	2.13407	1.3502	0.176951
BEST3	2.94301	1.92547	1.24433	1.54739	0.121768
BEST4	2.71441	-0.475915	0.696729	-0.68307	0.494562
BET1	395.676	0.144762	0.214222	0.675755	0.499196	0.999995
BET1L	219.27	-0.162061	0.188482	-0.859823	0.389887	0.999995
BEX1	2.83675	-0.124136	0.683477	-0.181625	0.855877
BEX2	66.6193	-0.133421	0.25982	-0.513511	0.607594	0.999995
BEX3	156.967	-0.408786	0.475119	-0.860387	0.389576	0.999995
BEX4	220.816	-0.123721	0.19947	-0.620251	0.535092	0.999995
BEX5	17.4879	-0.550972	0.41504	-1.32752	0.184338	0.999995
BFAR	460.152	-0.0021679	0.121531	-0.0178382	0.985768	0.999995
BFSP1	13.8613	-0.917543	0.464807	-1.97403	0.0483784	0.938526
BFSP2	3.18018	1.37809	0.782341	1.7615	0.0781535
BGLAP	0.918561	0.171615	1.22277	0.140349	0.888384
BGN	0
BHLHA15	5.95291	-0.129352	0.785544	-0.164666	0.869207
BHLHA9	0
BHLHB9	0.0537838	-0.178956	3.14975	-0.0568159	0.954692
BHLHE22	0
BHLHE23	0
BHLHE40	502.573	-0.250134	0.177947	-1.40567	0.159822	0.999995
BHLHE41	16.7635	1.05336	0.482943	2.18112	0.0291743	0.792699
BHMT	0.70366	1.4927	1.90831	0.782209	0.434092
BHMT2	0.0599736	-0.178956	3.14975	-0.0568159	0.954692
BICC1	3.27984	0.980165	0.698633	1.40298	0.160624
BICD1	128.297	-0.0564781	0.179997	-0.313773	0.753693	0.999995
BICD2	1299.25	-0.0147727	0.184287	-0.0801612	0.936109	0.999995
BICDL1	101.173	-0.182168	0.285863	-0.637255	0.523958	0.999995
BICDL2	3.14934	0.715586	0.774948	0.923399	0.355799
BICRA	56.2649	-0.038118	0.252149	-0.151172	0.87984	0.999995
BICRAL	807.286	-0.00644839	0.137639	-0.04685	0.962633	0.999995
BID	1593.44	0.120718	0.393557	0.306736	0.759045	0.999995
BIK	10.8423	-0.572578	0.414444	-1.38156	0.167108	0.999995
BIN1	492.525	-0.0466607	0.207016	-0.225397	0.82167	0.999995
BIN2	5261.01	0.118341	0.131576	0.899411	0.368434	0.999995
BIN3	357.326	0.0369185	0.209733	0.176026	0.860273	0.999995
BIRC2	2297.98	0.452704	0.235503	1.92229	0.0545697	0.970441
BIRC3	3435.36	0.424344	0.251616	1.68648	0.0917042	0.999995
BIRC5	14.0265	0.6793	0.369513	1.83837	0.0660085	0.999995
BIRC6	2317.6	0.0602907	0.121234	0.497309	0.618971	0.999995
BIRC7	0.714286	-0.0766957	1.5901	-0.0482334	0.96153
BIVM	97.1943	-0.168658	0.254967	-0.661492	0.508297	0.999995
BIVM-ERCC5	0
BLACAT1	0.979472	0.0194361	1.28095	0.0151731	0.987894
BLCAP	562.529	-0.0401422	0.0992795	-0.404336	0.685966	0.999995
BLID	0
BLK	150.318	0.337436	0.242758	1.39001	0.164526	0.999995
BLM	151.516	0.28571	0.206081	1.38639	0.165626	0.999995
BLMH	364.356	-0.0874512	0.130697	-0.669114	0.503423	0.999995
BLNK	162.287	0.599694	0.161229	3.71951	0.000199611	0.0770763
BLOC1S1	13.7066	-0.243262	0.337896	-0.719932	0.471567	0.999995
BLOC1S2	1167.4	0.0842908	0.45357	0.185838	0.852571	0.999995
BLOC1S3	131.744	-0.290828	0.200767	-1.44858	0.147454	0.999995
BLOC1S4	110.341	-0.076789	0.167766	-0.457715	0.647157	0.999995
BLOC1S5	245.369	-0.0630931	0.202829	-0.311066	0.755751	0.999995
BLOC1S5-TXNDC5	0
BLOC1S6	1422.81	0.315188	0.256483	1.22889	0.219114	0.999995
BLVRA	371.439	0.544613	0.253533	2.1481	0.031706	0.803414
BLVRB	1264.71	0.215326	0.73232	0.294033	0.768733	0.999995
BLZF1	604.716	0.326767	0.299478	1.09112	0.275219	0.999995
BMERB1	85.5935	-0.0829781	0.192833	-0.43031	0.66697	0.999995
BMF	220.45	0.16682	0.225709	0.73909	0.459852	0.999995
BMI1	532.71	-0.032186	0.121555	-0.264785	0.791175	0.999995
BMP1	18.1447	-0.00181085	0.378507	-0.0047842	0.996183	0.999995
BMP10	2.79923	0.0117251	0.723527	0.0162055	0.98707
BMP15	0
BMP2	7.70173	-0.893818	0.881729	-1.01371	0.310721	0.999995
BMP2K	331.441	0.196923	0.233945	0.841748	0.399929	0.999995
BMP3	2.06204	-1.60322	0.954745	-1.67922	0.0931101
BMP4	0.392265	0.684231	2.32855	0.293845	0.768877
BMP5	0
BMP6	111.217	-0.0122237	0.384223	-0.0318141	0.97462	0.999995
BMP7	0
BMP8A	19.0222	-0.181024	0.400804	-0.451652	0.65152	0.999995
BMP8B	29.9187	0.293987	0.395163	0.743965	0.456898	0.999995
BMPER	0.522102	0.609813	1.67125	0.364886	0.715197
BMPR1A	81.2062	0.0238578	0.24677	0.0966803	0.92298	0.999995
BMPR1B	1.03852	0.67832	1.23229	0.550454	0.582008
BMPR2	539.688	0.134468	0.13483	0.997321	0.318609	0.999995
BMS1	513.369	-0.0204739	0.133026	-0.153909	0.877681	0.999995
BMT2	536.275	0.0349044	0.324835	0.107453	0.91443	0.999995
BMX	111.527	0.433879	0.517868	0.837818	0.402133	0.999995
BNC1	0
BNC2	24.6866	-1.24303	0.471093	-2.63861	0.00832475	0.484335
BNIP1	49.2356	-0.0918444	0.218501	-0.420338	0.674239	0.999995
BNIP2	2682.84	0.0751968	0.161735	0.464938	0.641976	0.999995
BNIP3	211.848	-0.0668181	0.153448	-0.435444	0.66324	0.999995
BNIP3L	4642	0.636644	0.425999	1.49447	0.135052	0.999995
BNIP5	1.10977	1.93365	1.87587	1.0308	0.302633
BNIPL	25.7658	-0.134836	0.278961	-0.48335	0.628847	0.999995
BOC	0.464877	1.59889	2.20148	0.726277	0.467669
BOD1	210.578	0.073017	0.132062	0.5529	0.580332	0.999995
BOD1L1	4471.98	0.245121	0.17121	1.4317	0.15223	0.999995
BOD1L2	0.0854785	0.879007	3.14975	0.279072	0.78019
BOK	5.93017	-0.56591	0.995307	-0.568578	0.569642
BOLA1	57.4137	-0.226223	0.297459	-0.760519	0.446945	0.999995
BOLA2	0
BOLA2-SMG1P6	0.904186	-0.713692	1.53888	-0.463773	0.64281
BOLA2B	2.31085	0.332011	0.821619	0.404094	0.686144
BOLA3	5.97598	0.457715	0.519162	0.881643	0.37797
BOLL	0.147203	0.301937	3.14975	0.0958607	0.923631
BOP1	70.6921	-0.204039	0.282399	-0.722519	0.469976	0.999995
BORA	106.422	-0.118074	0.190964	-0.618306	0.536374	0.999995
BORCS5	79.2609	-0.145543	0.205205	-0.70926	0.478163	0.999995
BORCS6	63.7544	-0.0222156	0.22094	-0.10055	0.919907	0.999995
BORCS7	336.059	0.207267	0.215651	0.96112	0.336492	0.999995
BORCS7-ASMT	0
BORCS8	114.246	0.10813	0.20651	0.523609	0.60055	0.999995
BORCS8-MEF2B	0.217579	0.782837	2.60027	0.30106	0.763369
BPGM	1558.59	1.49624	0.795122	1.88177	0.0598671	0.986364
BPHL	34.5851	0.183138	0.300497	0.609448	0.542227	0.999995
BPI	47.3922	0.0441005	0.484853	0.0909565	0.927527	0.999995
BPIFA1	0
BPIFA2	0
BPIFA3	0
BPIFB1	0
BPIFB2	0
BPIFB3	0
BPIFB4	0.0535053	-0.178956	3.14975	-0.0568159	0.954692
BPIFB6	0
BPIFC	0.42571	1.90954	2.24675	0.849914	0.395373
BPNT1	201.657	-0.0574343	0.132531	-0.433367	0.664748	0.999995
BPNT2	810.417	-0.0982347	0.151477	-0.648511	0.516655	0.999995
BPTF	1025.49	-0.139813	0.219604	-0.636657	0.524348	0.999995
BPY2	0
BPY2B	0
BPY2C	0
BRAF	908.336	0.0420891	0.112607	0.373769	0.708576	0.999995
BRAP	414.44	0.0250994	0.161089	0.155811	0.876182	0.999995
BRAT1	219.588	-0.229247	0.202857	-1.13009	0.258438	0.999995
BRCA1	216.559	0.150763	0.198808	0.758337	0.448249	0.999995
BRCA2	95.0649	0.417596	0.290608	1.43697	0.150726	0.999995
BRCC3	404.607	0.0219868	0.17174	0.128023	0.898131	0.999995
BRD1	278.76	-0.193553	0.28258	-0.684952	0.493375	0.999995
BRD2	1881.38	-0.150906	0.15496	-0.973841	0.330136	0.999995
BRD3	160.569	-0.245498	0.17714	-1.3859	0.165778	0.999995
BRD3OS	49.4801	0.00435661	0.284092	0.0153352	0.987765	0.999995
BRD4	438.874	-0.0297107	0.156515	-0.189826	0.849445	0.999995
BRD7	806.552	-0.0492762	0.149795	-0.328957	0.742188	0.999995
BRD8	826.47	0.044091	0.152058	0.289962	0.771845	0.999995
BRD9	291.456	-0.173085	0.201259	-0.860014	0.389781	0.999995
BRDT	0.931719	-1.25536	1.90235	-0.6599	0.509318
BRF1	102.266	-0.186811	0.263808	-0.708134	0.478862	0.999995
BRF2	29.1003	-0.145059	0.274183	-0.52906	0.596764	0.999995
BRI3	721.037	0.0556028	0.303342	0.1833	0.854562	0.999995
BRI3BP	298.014	-0.141747	0.154993	-0.91454	0.360433	0.999995
BRICD5	11.5856	-0.101291	0.353886	-0.286226	0.774705	0.999995
BRINP1	0
BRINP2	0
BRINP3	0
BRIP1	37.4179	0.115541	0.292955	0.394399	0.693287	0.999995
BRIX1	278.906	0.0175634	0.235524	0.0745716	0.940556	0.999995
BRK1	1850.39	0.230197	0.387302	0.594361	0.552271	0.999995
BRME1	2.91031	-0.551414	0.828353	-0.665676	0.505618
BRMS1	333.564	-0.0960877	0.242464	-0.396296	0.691887	0.999995
BRMS1L	64.7011	0.187505	0.191288	0.980222	0.326977	0.999995
BROX	1718.56	0.0508091	0.175119	0.29014	0.771709	0.999995
BRPF1	199.634	-0.273266	0.25001	-1.09302	0.274386	0.999995
BRPF3	272.483	-0.201872	0.183632	-1.09933	0.271624	0.999995
BRS3	0.492158	-0.0168725	1.66808	-0.010115	0.99193
BRSK1	4.72835	-0.815775	0.57509	-1.41852	0.15604
BRSK2	1.09448	0.571912	1.12456	0.508566	0.611057
BRWD1	1995.74	0.0333365	0.116612	0.285875	0.774974	0.999995
BRWD3	1601.71	0.100772	0.135384	0.744347	0.456667	0.999995
BSCL2	6.38106	-0.154946	0.537991	-0.288009	0.773339
BSDC1	671.377	-0.0116739	0.106354	-0.109765	0.912596	0.999995
BSG	1905.92	0.105702	0.256064	0.412797	0.679755	0.999995
BSN	9.83944	-0.159889	0.538776	-0.296763	0.766647	0.999995
BSND	0.720079	0.460018	1.26322	0.364164	0.715736
BSPH1	0
BSPRY	3.90334	1.03078	0.671855	1.53422	0.124975
BST1	1278.01	0.317993	0.334174	0.951579	0.34131	0.999995
BST2	847.252	0.60593	0.234703	2.58169	0.00983188	0.53339
BSX	0
BTAF1	2095.58	-0.118872	0.221669	-0.536259	0.591779	0.999995
BTBD1	968.273	0.133378	0.13062	1.02112	0.307199	0.999995
BTBD10	680.847	0.304713	0.357193	0.853078	0.393616	0.999995
BTBD16	0.0854785	0.879007	3.14975	0.279072	0.78019
BTBD17	0.107011	-0.700296	3.14245	-0.22285	0.823652
BTBD18	1.95673	-1.25217	0.898959	-1.39291	0.163648
BTBD19	20.6755	0.0602663	0.324878	0.185504	0.852833	0.999995
BTBD2	204.383	-0.206408	0.257535	-0.801475	0.422857	0.999995
BTBD3	77.0586	0.314863	0.211627	1.48782	0.136797	0.999995
BTBD6	122.223	-0.412422	0.201307	-2.04872	0.0404893	0.887235
BTBD7	540.051	-0.0537048	0.112782	-0.476183	0.633944	0.999995
BTBD8	76.0088	0.22836	0.231876	0.984833	0.324706	0.999995
BTBD9	152.732	-0.144112	0.20543	-0.701513	0.482983	0.999995
BTC	0.248017	0.879007	3.14975	0.279072	0.78019
BTD	273.597	-0.1357	0.119791	-1.13281	0.257295	0.999995
BTF3	5295.1	0.293083	0.380928	0.769392	0.44166	0.999995
BTF3L4	733.559	0.0968352	0.231504	0.418287	0.675738	0.999995
BTG1	6490.47	-0.0535918	0.178123	-0.300869	0.763514	0.999995
BTG2	2821.64	-0.0281174	0.243968	-0.11525	0.908247	0.999995
BTG3	75.4554	0.11528	0.252059	0.457351	0.647419	0.999995
BTG4	0
BTK	1463.19	0.432007	0.182517	2.36695	0.0179356	0.6673
BTLA	560.834	0.60651	0.257041	2.35959	0.0182953	0.672014
BTN1A1	9.01765	0.249035	0.447955	0.555938	0.578253	0.999995
BTN2A1	1717.69	0.088968	0.123452	0.72067	0.471113	0.999995
BTN2A2	420.353	0.123805	0.121031	1.02292	0.306346	0.999995
BTN3A1	4124.74	0.0416059	0.220535	0.188658	0.85036	0.999995
BTN3A2	3307.03	0.320812	0.278032	1.15387	0.248555	0.999995
BTN3A3	1584.16	0.0789135	0.201962	0.390734	0.695994	0.999995
BTNL2	1.48046	0.699351	1.12683	0.620638	0.534838
BTNL3	84.1157	-1.09531	2.34022	-0.468039	0.639757	0.999995
BTNL8	513.583	0.681958	0.416716	1.63651	0.101734	0.999995
BTNL9	14.976	0.649057	0.790955	0.820598	0.411875	0.999995
BTRC	247.946	-0.188014	0.156291	-1.20298	0.228986	0.999995
BUB1	42.1456	0.495509	0.311244	1.59203	0.111378	0.999995
BUB1B	12.3919	0.0989914	0.485464	0.203911	0.838423	0.999995
BUB1B-PAK6	0.0599736	-0.178956	3.14975	-0.0568159	0.954692
BUB3	1531.81	0.0265983	0.0927289	0.286839	0.774236	0.999995
BUD13	288.083	0.0685059	0.148865	0.460189	0.64538	0.999995
BUD23	252.855	0.040201	0.133876	0.300285	0.763959	0.999995
BUD31	347.899	0.184821	0.396209	0.466474	0.640876	0.999995
BVES	0.689324	-2.18219	1.52557	-1.43041	0.152599
BYSL	39.1734	-0.276719	0.29917	-0.924953	0.35499	0.999995
BZW1	3567.57	0.167474	0.332746	0.50331	0.614746	0.999995
BZW2	262.828	0.139428	0.276799	0.503714	0.614462	0.999995
C10orf105	23.7918	0.177357	0.342296	0.518139	0.604361	0.999995
C10orf120	0
C10orf143	46.5586	-0.287353	0.211767	-1.35693	0.174803	0.999995
C10orf53	0
C10orf62	0
C10orf67	0.572913	1.75257	1.87311	0.935646	0.349455
C10orf71	0
C10orf82	3.78693	0.634571	1.02814	0.617205	0.5371
C10orf88	172.428	0.0460194	0.190049	0.242145	0.808668	0.999995
C10orf90	0.556992	-0.903047	1.68849	-0.534824	0.592772
C10orf95	0
C10orf99	0
C11orf1	99.1433	-0.0353316	0.422618	-0.0836018	0.933373	0.999995
C11orf16	0.952015	0.354995	1.61429	0.219908	0.825943
C11orf21	1138.5	-0.206269	0.178331	-1.15667	0.247408	0.999995
C11orf24	81.2701	0.21122	0.267813	0.788683	0.430297	0.999995
C11orf42	9.83384	-0.373744	0.432768	-0.863613	0.387801	0.999995
C11orf52	0
C11orf54	473.284	0.159669	0.272687	0.585539	0.558185	0.999995
C11orf58	2766	0.0927724	0.257267	0.360608	0.718392	0.999995
C11orf65	20.9719	-0.100546	0.36183	-0.277882	0.781103	0.999995
C11orf68	220.495	-0.126213	0.187509	-0.673104	0.500881	0.999995
C11orf71	77.201	-0.0746366	0.187911	-0.397191	0.691227	0.999995
C11orf80	62.2568	0.238142	0.18797	1.26692	0.205185	0.999995
C11orf86	0
C11orf87	0
C11orf91	0
C11orf94	0.526794	-0.958246	1.62849	-0.588425	0.556247
C11orf96	0.120944	-0.178956	3.14975	-0.0568159	0.954692
C11orf97	0.0876938	0.879007	3.14975	0.279072	0.78019
C11orf98	0
C12orf29	287.257	0.100724	0.272122	0.370144	0.711275	0.999995
C12orf4	311.887	0.216747	0.179007	1.21083	0.225961	0.999995
C12orf40	2.13048	-0.146181	0.95309	-0.153376	0.878102
C12orf42	28.0059	0.220751	0.263604	0.837433	0.402349	0.999995
C12orf43	92.655	-0.04055	0.164598	-0.246358	0.805405	0.999995
C12orf50	0.327367	-0.476099	2.96851	-0.160383	0.872579
C12orf54	0.0599736	-0.178956	3.14975	-0.0568159	0.954692
C12orf56	0.180918	-0.844832	3.13545	-0.269446	0.787587
C12orf57	21.023	-0.04171	0.28988	-0.143887	0.88559	0.999995
C12orf60	22.5357	0.175638	0.298504	0.588396	0.556266	0.999995
C12orf71	4.39503	0.11835	0.713684	0.16583	0.868291
C12orf73	60.5574	-0.167104	0.201999	-0.827251	0.408095	0.999995
C12orf75	467.531	-0.139314	0.321522	-0.433295	0.6648	0.999995
C12orf76	245.157	0.0676816	0.25586	0.264526	0.791375	0.999995
C13orf42	0.161073	-1.09457	3.1247	-0.350296	0.726116
C13orf46	3.72695	-1.13732	0.826267	-1.37645	0.168681
C14orf119	484.645	0.15787	0.296174	0.533032	0.594012	0.999995
C14orf132	10.6241	0.00539568	0.470595	0.0114656	0.990852	0.999995
C14orf180	0
C14orf28	117.798	-0.093306	0.193065	-0.483288	0.628891	0.999995
C14orf39	0
C14orf93	105.624	-0.0336407	0.167827	-0.200449	0.84113	0.999995
C15orf39	670.561	-0.0333125	0.2499	-0.133303	0.893954	0.999995
C15orf40	235.935	-0.1756	0.136501	-1.28643	0.198293	0.999995
C15orf48	1.33296	-0.581436	1.1605	-0.501024	0.616354
C15orf61	18.9121	-0.449463	0.301644	-1.49004	0.136212	0.999995
C15orf62	17.0865	-0.104962	0.30028	-0.349546	0.726679	0.999995
C16orf46	0
C16orf54	1845.56	-0.0472735	0.162372	-0.291143	0.770942	0.999995
C16orf72	2067.97	0.15419	0.253988	0.607075	0.543801	0.999995
C16orf74	16.0187	-0.289107	0.369028	-0.783429	0.433376	0.999995
C16orf78	0
C16orf82	0
C16orf86	10.6327	0.560673	0.389804	1.43834	0.150336	0.999995
C16orf87	144.481	-0.0417408	0.20192	-0.20672	0.836229	0.999995
C16orf89	0.432436	-0.716339	1.90644	-0.375748	0.707105
C16orf90	0.421238	1.88957	2.24774	0.840656	0.400541
C16orf91	42.4547	-0.281964	0.295884	-0.952956	0.340612	0.999995
C16orf92	0
C16orf95	1.21732	2.37081	1.31171	1.80741	0.070698
C16orf96	1.42138	-1.30552	1.09397	-1.19338	0.232721
C17orf100	30.9189	-0.3252	0.318224	-1.02192	0.306817	0.999995
C17orf107	0.0798014	0.879007	3.14975	0.279072	0.78019
C17orf113	3.04802	-0.283967	0.67128	-0.423024	0.672278
C17orf114	0.417768	1.87551	2.24868	0.834049	0.404254
C17orf49	7.20478	-0.459903	0.466293	-0.986296	0.323988
C17orf50	0.602431	-1.97678	1.50767	-1.31115	0.189806
C17orf58	19.0441	0.193327	0.318637	0.606732	0.544028	0.999995
C17orf64	0
C17orf67	35.7656	-0.246338	0.337411	-0.730082	0.46534	0.999995
C17orf75	149.266	-0.191555	0.202521	-0.945854	0.344223	0.999995
C17orf78	0.941448	-0.333816	1.80518	-0.184921	0.853291
C17orf80	253.253	-0.102398	0.142557	-0.718295	0.472575	0.999995
C17orf97	5.29295	-0.766648	0.744869	-1.02924	0.303367
C17orf98	0.0798014	0.879007	3.14975	0.279072	0.78019
C17orf99	4.52104	-0.198567	0.863651	-0.229916	0.818157
C18orf21	188.165	0.101273	0.28319	0.357613	0.720633	0.999995
C18orf25	1159.4	0.0668607	0.103011	0.649062	0.516298	0.999995
C18orf32	117.396	-0.0172629	0.219072	-0.0788002	0.937192	0.999995
C18orf54	82.3498	-0.0255416	0.232376	-0.109915	0.912477	0.999995
C18orf63	0
C19orf12	224.87	-0.21137	0.202463	-1.04399	0.296489	0.999995
C19orf18	2.54764	0.198333	0.883206	0.224561	0.822321
C19orf25	132.892	-0.157827	0.155513	-1.01488	0.310164	0.999995
C19orf33	0
C19orf38	770.154	0.206498	0.299556	0.689349	0.490604	0.999995
C19orf44	8.75043	-0.464691	0.514144	-0.903816	0.366093	0.999995
C19orf47	35.3151	-0.385437	0.240582	-1.6021	0.109133	0.999995
C19orf53	381.225	0.00447654	0.307638	0.0145513	0.98839	0.999995
C19orf54	35.8486	-0.0537061	0.428297	-0.125394	0.900211	0.999995
C19orf67	1.75712	0.895543	1.14013	0.785474	0.432176
C19orf73	0.553572	-0.296927	1.84734	-0.160732	0.872304
C19orf81	0.401491	0.0105461	2.86442	0.00368174	0.997062
C19orf84	6.2419	-1.16967	0.769045	-1.52094	0.128274
C19orf85	0
C1D	605.924	-0.119961	0.289479	-0.414403	0.678579	0.999995
C1GALT1	1706.01	0.427782	0.158493	2.69906	0.00695356	0.43249
C1GALT1C1	459.143	0.335717	0.341421	0.983296	0.325462	0.999995
C1GALT1C1L	0.0535053	-0.178956	3.14975	-0.0568159	0.954692
C1QA	5.4356	1.45996	0.619057	2.35837	0.0183555
C1QB	29.2062	1.84459	0.535435	3.44503	0.000571003	0.130521
C1QBP	355.344	-0.0495885	0.133213	-0.37225	0.709707	0.999995
C1QC	3.93385	2.33288	0.846195	2.7569	0.00583519
C1QL1	0.147667	0.301937	3.14975	0.0958607	0.923631
C1QL2	0.0535053	-0.178956	3.14975	-0.0568159	0.954692
C1QL3	22.5323	-0.668771	0.720161	-0.928641	0.353075	0.999995
C1QL4	0
C1QTNF1	0.700114	0.625316	1.92923	0.324127	0.745842
C1QTNF12	2.28035	-1.04363	0.848731	-1.22964	0.218833
C1QTNF2	0
C1QTNF3	42.7205	-0.0729624	0.286391	-0.254765	0.798904	0.999995
C1QTNF3-AMACR	0.332761	-0.155234	2.02405	-0.0766946	0.938867
C1QTNF4	0.434413	-1.49538	1.82099	-0.821191	0.411538
C1QTNF5	0
C1QTNF6	68.7133	-0.0607261	0.226152	-0.26852	0.788299	0.999995
C1QTNF7	2.4796	0.531401	0.690511	0.769576	0.441551
C1QTNF8	0
C1QTNF9	0.0535053	-0.178956	3.14975	-0.0568159	0.954692
C1QTNF9B	0.119947	-0.793096	3.13788	-0.252749	0.800462
C1R	14.8693	-0.43969	0.443374	-0.991691	0.321348	0.999995
C1RL	785.822	0.0988279	0.194202	0.508893	0.610827	0.999995
C1S	6.86012	-0.790069	0.52921	-1.49292	0.135457
C1orf100	2.61936	0.138078	0.736179	0.18756	0.851222
C1orf105	1.04111	0.169332	1.40053	0.120906	0.903766
C1orf109	163.518	-0.121914	0.166894	-0.730488	0.465092	0.999995
C1orf112	68.7288	0.292439	0.192996	1.51526	0.129707	0.999995
C1orf115	24.7371	0.327021	0.312456	1.04661	0.295278	0.999995
C1orf116	17.0278	0.434899	0.491082	0.885594	0.375836	0.999995
C1orf122	72.2323	-0.0011374	0.26566	-0.00428143	0.996584	0.999995
C1orf127	3.61624	-0.276367	0.750138	-0.368421	0.712559
C1orf131	284.452	0.148507	0.159023	0.933871	0.350371	0.999995
C1orf141	0
C1orf146	4.35175	0.0798528	0.579499	0.137796	0.890401
C1orf159	34.4435	-0.119073	0.387736	-0.307098	0.758769	0.999995
C1orf162	1462.43	0.262294	0.171873	1.52609	0.126988	0.999995
C1orf167	0.0842727	0.879007	3.14975	0.279072	0.78019
C1orf174	251.484	-0.173939	0.130216	-1.33577	0.181625	0.999995
C1orf185	0
C1orf198	59.2171	0.131685	0.285054	0.461964	0.644107	0.999995
C1orf21	254.949	-0.415778	0.221219	-1.87948	0.0601783	0.986364
C1orf210	0
C1orf216	89.0349	-0.409163	0.258144	-1.58502	0.112962	0.999995
C1orf226	1.84297	0.648941	1.1285	0.575046	0.56526
C1orf232	0
C1orf35	74.675	-0.0508935	0.30749	-0.165513	0.86854	0.999995
C1orf43	1575.82	0.142025	0.339402	0.418455	0.675614	0.999995
C1orf50	34.6783	-0.191438	0.258642	-0.740167	0.459199	0.999995
C1orf52	503.355	0.0511823	0.163016	0.313971	0.753543	0.999995
C1orf53	2.51868	-1.48842	1.16611	-1.27639	0.201816
C1orf54	26.9952	0.777608	0.416671	1.86624	0.0620079	0.989512
C1orf56	35.3273	0.00522544	0.251136	0.0208072	0.983399	0.999995
C1orf68	0
C1orf74	0.377825	0.184141	2.33182	0.0789688	0.937057
C1orf87	2.03656	-0.813586	1.27948	-0.63587	0.524861
C1orf94	0
C2	4.05648	-0.0195163	0.634259	-0.0307703	0.975453
C20orf141	0
C20orf144	0.785108	-2.48422	1.73968	-1.42798	0.153299
C20orf173	0.0854785	0.879007	3.14975	0.279072	0.78019
C20orf202	0.921075	0.0724627	1.33335	0.0543461	0.956659
C20orf203	0.194704	-0.219402	3.14245	-0.0698189	0.944338
C20orf204	2.12675	0.156271	1.0106	0.154632	0.877111
C20orf27	114.149	-0.327773	0.3532	-0.928008	0.353403	0.999995
C20orf85	0
C20orf96	16.8855	0.0477236	0.319627	0.14931	0.881309	0.999995
C21orf140	0
C21orf58	17.5278	-0.033368	0.340306	-0.0980529	0.92189	0.999995
C21orf62	1.99235	-0.55237	0.932141	-0.592582	0.553461
C21orf91	1188.96	0.160906	0.216402	0.743551	0.457148	0.999995
C22orf15	3.66189	1.27974	0.723919	1.76779	0.0770952
C22orf23	2.97851	-0.45722	0.684655	-0.667811	0.504254
C22orf31	0
C22orf39	308.577	-0.138855	0.159321	-0.871542	0.383458	0.999995
C22orf42	0.995924	0.219608	1.4724	0.149149	0.881436
C2CD2	104.926	0.10228	0.311498	0.328348	0.742649	0.999995
C2CD2L	209.993	-0.275146	0.220202	-1.24952	0.211476	0.999995
C2CD3	328.102	-0.0157146	0.211502	-0.0743002	0.940772	0.999995
C2CD4A	0
C2CD4B	0.0842727	0.879007	3.14975	0.279072	0.78019
C2CD4C	0
C2CD4D	2.94818	0.449728	0.687789	0.653875	0.513192
C2CD5	1330.55	0.145135	0.114557	1.26693	0.20518	0.999995
C2CD6	6.56712	-0.798402	0.513202	-1.55572	0.119774
C2orf15	12.823	-0.268071	0.334016	-0.802571	0.422223	0.999995
C2orf16	14.5693	-0.403775	0.323164	-1.24944	0.211503	0.999995
C2orf42	175.197	-0.105872	0.138669	-0.763489	0.445172	0.999995
C2orf49	641.006	0.0631946	0.107054	0.590308	0.554984	0.999995
C2orf50	3.52228	-0.406032	0.692008	-0.586745	0.557375
C2orf66	2.18636	-0.00355397	0.878343	-0.00404622	0.996772
C2orf68	889.422	-0.0644655	0.0998399	-0.645689	0.518481	0.999995
C2orf69	296.769	-0.0113273	0.130321	-0.0869186	0.930736	0.999995
C2orf72	0.0854785	0.879007	3.14975	0.279072	0.78019
C2orf73	0.307991	0.30194	2.87138	0.105155	0.916253
C2orf74	5.45836	0.260085	0.600483	0.433126	0.664923
C2orf76	107.841	0.113748	0.436281	0.260723	0.794306	0.999995
C2orf78	0.214021	-1.38267	3.11421	-0.443989	0.657051
C2orf80	0
C2orf81	1.59824	-0.640391	0.937449	-0.683121	0.49453
C2orf88	733.062	0.10489	0.736437	0.14243	0.886741	0.999995
C2orf92	32.1252	-0.468018	0.336049	-1.39271	0.163708	0.999995
C3	23.2078	0.00707657	0.396284	0.0178573	0.985753	0.999995
C3AR1	537.651	0.642747	0.267475	2.40302	0.0162602	0.635698
C3orf14	26.5666	-0.143941	0.355868	-0.404477	0.685862	0.999995
C3orf18	47.9755	-0.226537	0.232405	-0.97475	0.329684	0.999995
C3orf20	6.33855	-0.397486	0.560742	-0.708858	0.478413
C3orf22	1.46526	-0.554358	1.25014	-0.443438	0.657449
C3orf33	2.23661	0.696091	0.985577	0.706277	0.480016
C3orf38	521.809	0.251679	0.290493	0.866387	0.386278	0.999995
C3orf49	2.99795	-0.21648	0.689499	-0.313967	0.753546
C3orf52	35.5708	-0.121056	0.288392	-0.419761	0.67466	0.999995
C3orf56	0
C3orf62	390.416	0.161412	0.18441	0.875288	0.381417	0.999995
C3orf70	1.31509	0.454678	1.19918	0.379157	0.704571
C3orf80	0.133585	0.301937	3.14975	0.0958607	0.923631
C3orf84	0
C3orf85	0
C4A	3.19346	-0.730454	0.769744	-0.948956	0.342643
C4B	2.93192	0.753387	1.11893	0.673312	0.500749
C4BPA	681.971	-0.357224	1.07133	-0.33344	0.738802	0.999995
C4BPB	3.55155	-0.631635	0.804099	-0.785519	0.432149
C4orf17	0
C4orf19	11.5085	0.216004	0.570338	0.378729	0.704889	0.999995
C4orf3	2965.07	0.287864	0.407822	0.705858	0.480277	0.999995
C4orf33	371.852	0.134228	0.144607	0.928225	0.353291	0.999995
C4orf36	0.159603	1.3599	3.14975	0.431748	0.665924
C4orf45	2.99708	1.26648	0.851189	1.4879	0.136778
C4orf46	120.539	-0.161277	0.135931	-1.18646	0.23544	0.999995
C4orf47	0.394696	1.24143	1.94312	0.638883	0.522899
C4orf48	17.3624	-0.12221	0.338397	-0.361143	0.717992	0.999995
C4orf50	8.83907	-1.05875	0.611718	-1.73077	0.0834921	0.999995
C4orf51	0
C4orf54	0.166984	-1.12634	3.12345	-0.360609	0.718392
C5	106.499	0.749632	0.281104	2.66674	0.00765899	0.457867
C5AR1	4798.71	-0.00554854	0.327626	-0.0169356	0.986488	0.999995
C5AR2	1220.61	0.0406184	0.244119	0.166388	0.867852	0.999995
C5orf15	929.603	0.179484	0.134931	1.33019	0.183456	0.999995
C5orf22	382.087	0.182036	0.156218	1.16527	0.243911	0.999995
C5orf24	699.928	0.0269502	0.144056	0.187081	0.851597	0.999995
C5orf34	33.8589	-0.193349	0.290067	-0.666565	0.50505	0.999995
C5orf46	2.62106	0.855633	1.10277	0.775897	0.43781
C5orf47	1.27324	-0.375389	1.09356	-0.343271	0.731394
C5orf49	0
C5orf52	0
C5orf58	75.5477	0.0786605	0.255381	0.308012	0.758073	0.999995
C5orf63	79.511	-0.0655725	0.229193	-0.286102	0.7748	0.999995
C6	0
C6orf118	0
C6orf120	491.929	-0.0937462	0.108625	-0.863023	0.388125	0.999995
C6orf132	1.88755	0.394256	1.12515	0.350402	0.726037
[truncated: 18,026 more rows]
