# Supplementary material
Source: Research Square preprint supplement (doi:10.21203/rs.3.rs-8976053/v1)
Supplement: Supplementary file 12 [file a02032e0c871d983cc46106e.xlsx]

## Sheet: Sheet1
source	term_name	term_id	highlighted	adjusted_p_value	negative_log10_of_adjusted_p_value	term_size	query_size	intersection_size	effective_domain_size	intersections
GO:MF	molecular_function	GO:0003674	TRUE	4.22E-56	55.3742	20246	106	104	78724	HK2,GPR171,IRAK3,TIMP2,CKAP4,STX17,IL7R,MGST1,NDST1,TSHZ3,PLBD1,ATF7IP2,CLEC3B,CRYGS,SPINK2,EVL,DLGAP3,PTS,GADD45A,PLXDC2,ASPH,RNF175,ABCD2,UBTD1,CDK5R1,OTUD3,CEBPA,FGF9,RPLP0,RAB13,ABAT,THEM4,WIPI1,ST3GAL6,ATXN1L,KIF3C,TNFSF13,RRAGD,CD163,RSPH9,TRIB2,FGD4,ANKRD36,LY9,CRAT,SRPK1,FAM3B,FKBP9,GIMAP5,FUT8,NRG1,TCF4,ZDHHC19,KIAA0319,CXCR6,EPHA4,ANO10,TLR2,CYP1B1,SEC31B,SLC22A15,MAPK14,HSP90AB1,NDUFA4…
GO:MF	protein binding	GO:0005515	FALSE	1.96E-48	47.7068	15123	106	92	78724	HK2,IRAK3,TIMP2,CKAP4,STX17,IL7R,MGST1,NDST1,TSHZ3,ATF7IP2,CLEC3B,CRYGS,SPINK2,EVL,DLGAP3,PTS,GADD45A,PLXDC2,ASPH,RNF175,ABCD2,UBTD1,CDK5R1,OTUD3,CEBPA,FGF9,RPLP0,RAB13,ABAT,THEM4,WIPI1,ATXN1L,KIF3C,TNFSF13,RRAGD,CD163,RSPH9,TRIB2,FGD4,ANKRD36,LY9,SRPK1,FAM3B,GIMAP5,FUT8,NRG1,TCF4,ZDHHC19,KIAA0319,CXCR6,EPHA4,TLR2,CYP1B1,SEC31B,MAPK14,HSP90AB1,NDUFA4,IL1R2,NMT2,AATK,MRPL13,ATP8B4,S1PR3,GBE1,IL1R1…
GO:MF	binding	GO:0005488	FALSE	8.86E-48	47.0526	18498	106	97	78724	HK2,GPR171,IRAK3,TIMP2,CKAP4,STX17,IL7R,MGST1,NDST1,TSHZ3,ATF7IP2,CLEC3B,CRYGS,SPINK2,EVL,DLGAP3,PTS,GADD45A,PLXDC2,ASPH,RNF175,ABCD2,UBTD1,CDK5R1,OTUD3,CEBPA,FGF9,RPLP0,RAB13,ABAT,THEM4,WIPI1,ATXN1L,KIF3C,TNFSF13,RRAGD,CD163,RSPH9,TRIB2,FGD4,ANKRD36,LY9,SRPK1,FAM3B,FKBP9,GIMAP5,FUT8,NRG1,TCF4,ZDHHC19,KIAA0319,CXCR6,EPHA4,TLR2,CYP1B1,SEC31B,MAPK14,HSP90AB1,NDUFA4,IL1R2,NMT2,AATK,MRPL13,ATP8B4,S1P…
GO:MF	catalytic activity	GO:0003824	FALSE	8.75E-23	22.0578	6817	106	50	78724	HK2,IRAK3,TIMP2,MGST1,NDST1,PLBD1,SPINK2,PTS,ASPH,RNF175,ABCD2,CDK5R1,OTUD3,RAB13,ABAT,THEM4,ST3GAL6,KIF3C,RRAGD,TRIB2,FGD4,CRAT,SRPK1,FKBP9,FUT8,NRG1,ZDHHC19,EPHA4,TLR2,CYP1B1,MAPK14,HSP90AB1,NDUFA4,NMT2,AATK,ATP8B4,GBE1,IL1R1,CBS,MPP1,SIAH2,RNF135,ASPRV1,NCEH1,DPP4,MTMR3,PTPRK,SRXN1,HK3,BMX
GO:MF	ion binding	GO:0043167	FALSE	8.26E-15	14.083	6377	106	40	78724	HK2,IRAK3,TIMP2,TSHZ3,CLEC3B,PTS,ASPH,RNF175,ABCD2,CDK5R1,RAB13,ABAT,WIPI1,KIF3C,RRAGD,TRIB2,FGD4,SRPK1,FKBP9,GIMAP5,EPHA4,CYP1B1,MAPK14,HSP90AB1,AATK,ATP8B4,ZNF532,GBE1,CBS,F5,S100P,NR1D2,SIAH2,RNF135,NCEH1,MTMR3,MCTP1,SRXN1,HK3,BMX
GO:MF	small molecule binding	GO:0036094	FALSE	2.39E-14	13.6219	6577	106	40	78724	HK2,IRAK3,TIMP2,TSHZ3,CLEC3B,PTS,ASPH,RNF175,ABCD2,CDK5R1,RAB13,ABAT,WIPI1,KIF3C,RRAGD,TRIB2,FGD4,SRPK1,FKBP9,GIMAP5,EPHA4,CYP1B1,MAPK14,HSP90AB1,AATK,ATP8B4,ZNF532,GBE1,CBS,F5,S100P,NR1D2,SIAH2,RNF135,NCEH1,MTMR3,MCTP1,SRXN1,HK3,BMX
GO:MF	transferase activity	GO:0016740	FALSE	2.75E-12	11.5609	2594	106	25	78724	HK2,IRAK3,MGST1,NDST1,RNF175,CDK5R1,ABAT,ST3GAL6,TRIB2,CRAT,SRPK1,FUT8,NRG1,ZDHHC19,EPHA4,MAPK14,HSP90AB1,NMT2,AATK,GBE1,MPP1,SIAH2,RNF135,HK3,BMX
GO:MF	enzyme binding	GO:0019899	FALSE	2.91E-12	11.5356	2107	106	23	78724	IRAK3,TIMP2,STX17,GADD45A,CDK5R1,CEBPA,ABAT,RRAGD,TRIB2,FGD4,NRG1,EPHA4,MAPK14,HSP90AB1,IL1R1,CBS,CCDC50,SIAH2,DPP4,MTMR3,PTPRK,JDP2,TFEB
GO:MF	catalytic activity, acting on a protein	GO:0140096	FALSE	2.23E-11	10.6511	2849	106	25	78724	IRAK3,TIMP2,SPINK2,ASPH,RNF175,CDK5R1,OTUD3,TRIB2,SRPK1,FKBP9,FUT8,NRG1,ZDHHC19,EPHA4,MAPK14,HSP90AB1,NMT2,AATK,SIAH2,RNF135,ASPRV1,DPP4,MTMR3,PTPRK,BMX
GO:MF	anion binding	GO:0043168	FALSE	3.41E-09	8.46708	2685	106	22	78724	HK2,IRAK3,ABCD2,RAB13,ABAT,WIPI1,KIF3C,RRAGD,TRIB2,FGD4,SRPK1,GIMAP5,EPHA4,MAPK14,HSP90AB1,AATK,ATP8B4,CBS,NCEH1,SRXN1,HK3,BMX
GO:MF	carbohydrate derivative binding	GO:0097367	FALSE	8.92E-09	8.04964	2536	106	21	78724	HK2,IRAK3,CLEC3B,ABCD2,FGF9,RAB13,KIF3C,RRAGD,TRIB2,FGD4,SRPK1,GIMAP5,EPHA4,TLR2,MAPK14,HSP90AB1,AATK,ATP8B4,SRXN1,HK3,BMX
GO:MF	cation binding	GO:0043169	FALSE	7.07E-08	7.15035	4495	106	26	78724	IRAK3,TIMP2,TSHZ3,CLEC3B,PTS,ASPH,RNF175,CDK5R1,ABAT,FGD4,SRPK1,FKBP9,CYP1B1,AATK,ATP8B4,ZNF532,GBE1,CBS,F5,S100P,NR1D2,SIAH2,RNF135,MTMR3,MCTP1,BMX
GO:MF	heterocyclic compound binding	GO:1901363	FALSE	7.72E-08	7.11235	2558	106	20	78724	HK2,IRAK3,ABCD2,RAB13,ABAT,KIF3C,RRAGD,TRIB2,FGD4,SRPK1,GIMAP5,EPHA4,MAPK14,HSP90AB1,AATK,ATP8B4,CBS,SRXN1,HK3,BMX
GO:MF	molecular transducer activity	GO:0060089	FALSE	1.14E-07	6.94312	2053	106	18	78724	GPR171,IL7R,FGF9,TNFSF13,FAM3B,NRG1,CXCR6,EPHA4,TLR2,HSP90AB1,IL1R2,S1PR3,IL1R1,IL13RA1,NR1D2,DPP4,PTPRK,ADM
GO:MF	signaling receptor activity	GO:0038023	FALSE	1.14E-07	6.94312	2053	106	18	78724	GPR171,IL7R,FGF9,TNFSF13,FAM3B,NRG1,CXCR6,EPHA4,TLR2,HSP90AB1,IL1R2,S1PR3,IL1R1,IL13RA1,NR1D2,DPP4,PTPRK,ADM
GO:MF	purine ribonucleoside triphosphate binding	GO:0035639	FALSE	1.48E-07	6.83012	2087	106	18	78724	HK2,IRAK3,ABCD2,RAB13,KIF3C,RRAGD,TRIB2,FGD4,SRPK1,GIMAP5,EPHA4,MAPK14,HSP90AB1,AATK,ATP8B4,SRXN1,HK3,BMX
GO:MF	purine ribonucleotide binding	GO:0032555	FALSE	2.31E-07	6.63579	2147	106	18	78724	HK2,IRAK3,ABCD2,RAB13,KIF3C,RRAGD,TRIB2,FGD4,SRPK1,GIMAP5,EPHA4,MAPK14,HSP90AB1,AATK,ATP8B4,SRXN1,HK3,BMX
GO:MF	metal ion binding	GO:0046872	FALSE	2.41E-07	6.61714	4396	106	25	78724	IRAK3,TIMP2,TSHZ3,CLEC3B,PTS,ASPH,RNF175,CDK5R1,ABAT,FGD4,SRPK1,FKBP9,CYP1B1,AATK,ATP8B4,ZNF532,CBS,F5,S100P,NR1D2,SIAH2,RNF135,MTMR3,MCTP1,BMX
GO:MF	ribonucleotide binding	GO:0032553	FALSE	2.62E-07	6.58186	2164	106	18	78724	HK2,IRAK3,ABCD2,RAB13,KIF3C,RRAGD,TRIB2,FGD4,SRPK1,GIMAP5,EPHA4,MAPK14,HSP90AB1,AATK,ATP8B4,SRXN1,HK3,BMX
GO:MF	kinase activity	GO:0016301	FALSE	4.01E-07	6.39719	1000	106	13	78724	HK2,IRAK3,CDK5R1,TRIB2,SRPK1,NRG1,EPHA4,MAPK14,HSP90AB1,AATK,MPP1,HK3,BMX
GO:MF	purine nucleotide binding	GO:0017076	FALSE	4.53E-07	6.3436	2241	106	18	78724	HK2,IRAK3,ABCD2,RAB13,KIF3C,RRAGD,TRIB2,FGD4,SRPK1,GIMAP5,EPHA4,MAPK14,HSP90AB1,AATK,ATP8B4,SRXN1,HK3,BMX
GO:MF	hydrolase activity	GO:0016787	FALSE	8.01E-07	6.09648	3255	106	21	78724	TIMP2,NDST1,PLBD1,SPINK2,ABCD2,OTUD3,RAB13,THEM4,KIF3C,RRAGD,FGD4,TLR2,HSP90AB1,ATP8B4,GBE1,IL1R1,ASPRV1,NCEH1,DPP4,MTMR3,PTPRK
GO:MF	signaling receptor binding	GO:0005102	FALSE	8.23E-07	6.08467	1521	106	15	78724	CDK5R1,FGF9,WIPI1,TNFSF13,FAM3B,NRG1,EPHA4,TLR2,HSP90AB1,S1PR3,IL1R1,MPP1,RNF135,DPP4,ADM
GO:MF	nucleotide binding	GO:0000166	FALSE	1.36873E-06	5.86368	2406	106	18	78724	HK2,IRAK3,ABCD2,RAB13,KIF3C,RRAGD,TRIB2,FGD4,SRPK1,GIMAP5,EPHA4,MAPK14,HSP90AB1,AATK,ATP8B4,SRXN1,HK3,BMX
GO:MF	phosphotransferase activity, alcohol group as acceptor	GO:0016773	FALSE	1.4798E-06	5.8298	906	106	12	78724	HK2,IRAK3,CDK5R1,TRIB2,SRPK1,NRG1,EPHA4,MAPK14,HSP90AB1,AATK,HK3,BMX
GO:MF	nucleoside phosphate binding	GO:1901265	FALSE	1.53579E-06	5.81367	2424	106	18	78724	HK2,IRAK3,ABCD2,RAB13,KIF3C,RRAGD,TRIB2,FGD4,SRPK1,GIMAP5,EPHA4,MAPK14,HSP90AB1,AATK,ATP8B4,SRXN1,HK3,BMX
GO:MF	protein dimerization activity	GO:0046983	FALSE	1.64513E-06	5.7838	1126	106	13	78724	IRAK3,GADD45A,ABCD2,CEBPA,RRAGD,TCF4,HSP90AB1,CBS,S100P,DPP4,JDP2,MYC,TFEB
GO:MF	transferase activity, transferring phosphorus-containing groups	GO:0016772	FALSE	2.74658E-06	5.56121	1176	106	13	78724	HK2,IRAK3,CDK5R1,TRIB2,SRPK1,NRG1,EPHA4,MAPK14,HSP90AB1,AATK,MPP1,HK3,BMX
GO:MF	kinase binding	GO:0019900	FALSE	4.41673E-06	5.3549	796	106	11	78724	IRAK3,STX17,GADD45A,CDK5R1,CEBPA,TRIB2,NRG1,EPHA4,MAPK14,HSP90AB1,PTPRK
GO:MF	ATP binding	GO:0005524	FALSE	6.65475E-06	5.17687	1516	106	14	78724	HK2,IRAK3,ABCD2,KIF3C,TRIB2,SRPK1,EPHA4,MAPK14,HSP90AB1,AATK,ATP8B4,SRXN1,HK3,BMX
GO:MF	adenyl ribonucleotide binding	GO:0032559	FALSE	9.33013E-06	5.03011	1558	106	14	78724	HK2,IRAK3,ABCD2,KIF3C,TRIB2,SRPK1,EPHA4,MAPK14,HSP90AB1,AATK,ATP8B4,SRXN1,HK3,BMX
GO:MF	identical protein binding	GO:0042802	FALSE	1.45126E-05	4.83825	2182	106	16	78724	IRAK3,PTS,GADD45A,ABCD2,CEBPA,ABAT,TCF4,EPHA4,TLR2,HSP90AB1,CBS,S100P,RNF135,DPP4,JDP2,MYC
GO:MF	adenyl nucleotide binding	GO:0030554	FALSE	1.9024E-05	4.7207	1651	106	14	78724	HK2,IRAK3,ABCD2,KIF3C,TRIB2,SRPK1,EPHA4,MAPK14,HSP90AB1,AATK,ATP8B4,SRXN1,HK3,BMX
GO:MF	peptide binding	GO:0042277	FALSE	2.23759E-05	4.65022	254	106	7	78724	GPR171,DLGAP3,EPHA4,TLR2,HSP90AB1,SLC7A5,KPNA3
GO:MF	protein kinase activity	GO:0004672	FALSE	4.50202E-05	4.34659	786	106	10	78724	IRAK3,CDK5R1,TRIB2,SRPK1,NRG1,EPHA4,MAPK14,HSP90AB1,AATK,BMX
GO:MF	cytokine receptor activity	GO:0004896	FALSE	0.000119702	3.9219	104	106	5	78724	IL7R,CXCR6,IL1R2,IL1R1,IL13RA1
GO:MF	protein kinase binding	GO:0019901	FALSE	0.000220891	3.65582	717	106	9	78724	IRAK3,STX17,CDK5R1,TRIB2,NRG1,EPHA4,MAPK14,HSP90AB1,PTPRK
GO:MF	protein homodimerization activity	GO:0042803	FALSE	0.000259083	3.58656	731	106	9	78724	IRAK3,GADD45A,ABCD2,CEBPA,HSP90AB1,CBS,S100P,DPP4,JDP2
GO:MF	transmembrane signaling receptor activity	GO:0004888	FALSE	0.000601766	3.22057	1307	106	11	78724	GPR171,IL7R,NRG1,CXCR6,EPHA4,TLR2,IL1R2,S1PR3,IL1R1,IL13RA1,PTPRK
GO:MF	immune receptor activity	GO:0140375	FALSE	0.00078239	3.10658	152	106	5	78724	IL7R,CXCR6,IL1R2,IL1R1,IL13RA1
GO:MF	protein domain specific binding	GO:0019904	FALSE	0.00116716	2.93287	655	106	8	78724	CLEC3B,EVL,ATXN1L,FUT8,EPHA4,HSP90AB1,JDP2,INSC
GO:MF	molecular adaptor activity	GO:0060090	FALSE	0.00217508	2.66253	1212	106	10	78724	STX17,ATF7IP2,DLGAP3,WIPI1,RRAGD,NRG1,SIAH2,MTMR3,COL4A4,INSC
GO:MF	molecular function regulator activity	GO:0098772	FALSE	0.00305771	2.5146	2195	106	13	78724	TIMP2,SPINK2,CDK5R1,FGF9,TNFSF13,TRIB2,FGD4,FAM3B,NRG1,HSP90AB1,DPP4,ADM,MYC
GO:MF	receptor ligand activity	GO:0048018	FALSE	0.00331424	2.47962	539	106	7	78724	FGF9,TNFSF13,FAM3B,NRG1,HSP90AB1,DPP4,ADM
GO:MF	oxidoreductase activity	GO:0016491	FALSE	0.00340259	2.46819	759	106	8	78724	MGST1,ASPH,CRAT,CYP1B1,HSP90AB1,NDUFA4,CBS,SRXN1
GO:MF	signaling receptor activator activity	GO:0030546	FALSE	0.0036016	2.4435	546	106	7	78724	FGF9,TNFSF13,FAM3B,NRG1,HSP90AB1,DPP4,ADM
GO:MF	protein heterodimerization activity	GO:0046982	FALSE	0.0038389	2.41579	363	106	6	78724	IRAK3,GADD45A,ABCD2,RRAGD,TCF4,JDP2
GO:MF	signaling receptor regulator activity	GO:0030545	FALSE	0.00548625	2.26072	583	106	7	78724	FGF9,TNFSF13,FAM3B,NRG1,HSP90AB1,DPP4,ADM
GO:MF	fructokinase activity	GO:0008865	FALSE	0.00644308	2.19091	5	106	2	78724	HK2,HK3
GO:MF	hexokinase activity	GO:0004396	FALSE	0.00644308	2.19091	5	106	2	78724	HK2,HK3
GO:MF	glucokinase activity	GO:0004340	FALSE	0.00644308	2.19091	5	106	2	78724	HK2,HK3
GO:BP	biological_process	GO:0008150	TRUE	7.75E-45	44.1105	21026	106	99	78724	HK2,GPR171,IRAK3,TIMP2,STX17,IL7R,MGST1,NDST1,TSHZ3,PLBD1,ATF7IP2,CLEC3B,CRYGS,SPINK2,EVL,DLGAP3,PTS,GADD45A,ASPH,RNF175,ABCD2,CDK5R1,OTUD3,CEBPA,FGF9,RPLP0,RAB13,ABAT,THEM4,WIPI1,ST3GAL6,ATXN1L,KIF3C,TNFSF13,RRAGD,CD163,RSPH9,TRIB2,FGD4,LY9,CRAT,SRPK1,FAM3B,FKBP9,FUT8,NRG1,TCF4,ZDHHC19,KIAA0319,CXCR6,EPHA4,ANO10,TLR2,CYP1B1,SEC31B,SLC22A15,MAPK14,HSP90AB1,NDUFA4,IL1R2,NMT2,AATK,MRPL13,ATP8B4,S1P…
GO:BP	cellular process	GO:0009987	FALSE	6.49E-42	41.1881	20247	106	96	78724	HK2,GPR171,IRAK3,TIMP2,STX17,IL7R,MGST1,NDST1,TSHZ3,PLBD1,ATF7IP2,CLEC3B,SPINK2,EVL,DLGAP3,PTS,GADD45A,ASPH,RNF175,ABCD2,CDK5R1,OTUD3,CEBPA,FGF9,RPLP0,RAB13,ABAT,THEM4,WIPI1,ST3GAL6,ATXN1L,KIF3C,TNFSF13,RRAGD,CD163,RSPH9,TRIB2,FGD4,LY9,CRAT,SRPK1,FAM3B,FKBP9,FUT8,NRG1,TCF4,ZDHHC19,KIAA0319,CXCR6,EPHA4,ANO10,TLR2,CYP1B1,SEC31B,SLC22A15,MAPK14,HSP90AB1,NDUFA4,IL1R2,NMT2,AATK,MRPL13,ATP8B4,S1PR3,ZNF…
GO:BP	biological regulation	GO:0065007	FALSE	3.52E-27	26.4529	12743	106	70	78724	HK2,GPR171,IRAK3,TIMP2,IL7R,NDST1,TSHZ3,ATF7IP2,CLEC3B,EVL,DLGAP3,GADD45A,ASPH,ABCD2,CDK5R1,OTUD3,CEBPA,FGF9,RAB13,ABAT,THEM4,WIPI1,ATXN1L,TNFSF13,RRAGD,TRIB2,FGD4,LY9,SRPK1,FAM3B,FUT8,NRG1,TCF4,ZDHHC19,KIAA0319,CXCR6,EPHA4,TLR2,CYP1B1,MAPK14,HSP90AB1,IL1R2,NMT2,MRPL13,ATP8B4,S1PR3,ZNF532,GBE1,IL1R1,CBS,F5,SLC7A5,IL13RA1,MPP1,NR1D2,SIAH2,RNF135,NCEH1,DPP4,MTMR3,PTPRK,ADM,MCTP1,CDCA8,JDP2,INSC,CD6…
GO:BP	response to stimulus	GO:0050896	FALSE	4.93E-27	26.3071	8999	106	61	78724	HK2,GPR171,IRAK3,TIMP2,IL7R,MGST1,NDST1,EVL,GADD45A,ASPH,RNF175,ABCD2,CDK5R1,OTUD3,CEBPA,FGF9,RAB13,ABAT,THEM4,WIPI1,ST3GAL6,TNFSF13,RRAGD,CD163,FGD4,LY9,SRPK1,FAM3B,FUT8,NRG1,KIAA0319,CXCR6,EPHA4,TLR2,CYP1B1,MAPK14,HSP90AB1,IL1R2,NMT2,S1PR3,IL1R1,CBS,F5,SLC7A5,IL13RA1,MPP1,NR1D2,SIAH2,RNF135,NCEH1,DPP4,MTMR3,PTPRK,ADM,MCTP1,CDCA8,SRXN1,CD63,MYC,BMX,TFEB
GO:BP	regulation of biological process	GO:0050789	FALSE	4.55E-26	25.342	12336	106	68	78724	HK2,GPR171,IRAK3,TIMP2,IL7R,NDST1,TSHZ3,ATF7IP2,CLEC3B,EVL,DLGAP3,GADD45A,ASPH,ABCD2,CDK5R1,OTUD3,CEBPA,FGF9,RAB13,ABAT,THEM4,WIPI1,ATXN1L,TNFSF13,RRAGD,TRIB2,FGD4,LY9,SRPK1,FAM3B,FUT8,NRG1,TCF4,ZDHHC19,KIAA0319,CXCR6,EPHA4,TLR2,CYP1B1,MAPK14,HSP90AB1,IL1R2,NMT2,MRPL13,S1PR3,ZNF532,GBE1,IL1R1,CBS,SLC7A5,IL13RA1,MPP1,NR1D2,SIAH2,RNF135,NCEH1,DPP4,MTMR3,PTPRK,ADM,MCTP1,CDCA8,JDP2,INSC,CD63,MYC,BMX,…
GO:BP	regulation of cellular process	GO:0050794	FALSE	6.23E-26	25.2055	11946	106	67	78724	HK2,GPR171,IRAK3,TIMP2,IL7R,NDST1,TSHZ3,ATF7IP2,CLEC3B,EVL,DLGAP3,GADD45A,ASPH,ABCD2,CDK5R1,OTUD3,CEBPA,FGF9,RAB13,ABAT,THEM4,WIPI1,ATXN1L,TNFSF13,RRAGD,TRIB2,FGD4,LY9,SRPK1,FAM3B,FUT8,NRG1,TCF4,ZDHHC19,KIAA0319,CXCR6,EPHA4,TLR2,CYP1B1,MAPK14,HSP90AB1,IL1R2,NMT2,MRPL13,S1PR3,ZNF532,GBE1,IL1R1,CBS,SLC7A5,IL13RA1,MPP1,NR1D2,SIAH2,RNF135,DPP4,MTMR3,PTPRK,ADM,MCTP1,CDCA8,JDP2,INSC,CD63,MYC,BMX,TFEB
GO:BP	cellular response to stimulus	GO:0051716	FALSE	1.95E-24	23.7099	7376	106	54	78724	GPR171,IRAK3,IL7R,MGST1,NDST1,EVL,GADD45A,ASPH,RNF175,CDK5R1,OTUD3,CEBPA,FGF9,RAB13,ABAT,THEM4,WIPI1,TNFSF13,RRAGD,FGD4,SRPK1,FAM3B,FUT8,NRG1,KIAA0319,CXCR6,EPHA4,TLR2,CYP1B1,MAPK14,HSP90AB1,IL1R2,NMT2,S1PR3,IL1R1,CBS,SLC7A5,IL13RA1,MPP1,NR1D2,SIAH2,RNF135,NCEH1,DPP4,MTMR3,PTPRK,ADM,MCTP1,CDCA8,SRXN1,CD63,MYC,BMX,TFEB
GO:BP	developmental process	GO:0032502	FALSE	7.59E-23	22.1199	6553	106	50	78724	HK2,GPR171,IRAK3,IL7R,NDST1,CLEC3B,CRYGS,SPINK2,EVL,PTS,GADD45A,ASPH,ABCD2,CDK5R1,CEBPA,FGF9,RAB13,ABAT,ATXN1L,TNFSF13,TRIB2,FGD4,LY9,SRPK1,FUT8,NRG1,TCF4,KIAA0319,EPHA4,TLR2,CYP1B1,MAPK14,HSP90AB1,AATK,S1PR3,CBS,SLC7A5,VSIG1,NR1D2,SIAH2,ASPRV1,ADM,SLC25A40,JDP2,COL4A4,INSC,CD63,MYC,BMX,TFEB
GO:BP	metabolic process	GO:0008152	FALSE	1.76E-22	21.7544	14136	106	68	78724	HK2,IRAK3,TIMP2,STX17,IL7R,NDST1,TSHZ3,PLBD1,ATF7IP2,CLEC3B,PTS,GADD45A,ASPH,RNF175,ABCD2,CDK5R1,OTUD3,CEBPA,FGF9,RPLP0,ABAT,THEM4,WIPI1,ST3GAL6,ATXN1L,TNFSF13,RRAGD,TRIB2,LY9,CRAT,SRPK1,FKBP9,FUT8,NRG1,TCF4,ZDHHC19,EPHA4,TLR2,CYP1B1,MAPK14,HSP90AB1,NDUFA4,IL1R2,NMT2,AATK,MRPL13,S1PR3,ZNF532,GBE1,IL1R1,CBS,SLC7A5,MPP1,NR1D2,SIAH2,RNF135,ASPRV1,NCEH1,DPP4,TMCC2,MTMR3,PTPRK,ADM,JDP2,MYC,HK3,BMX,TFEB
GO:BP	anatomical structure development	GO:0048856	FALSE	1.50E-21	20.8243	5997	106	47	78724	HK2,GPR171,IRAK3,IL7R,NDST1,CLEC3B,CRYGS,SPINK2,EVL,PTS,GADD45A,ASPH,ABCD2,CDK5R1,CEBPA,FGF9,RAB13,ABAT,ATXN1L,TNFSF13,FGD4,LY9,SRPK1,FUT8,NRG1,TCF4,KIAA0319,EPHA4,TLR2,CYP1B1,MAPK14,HSP90AB1,AATK,S1PR3,CBS,SLC7A5,VSIG1,NR1D2,SIAH2,ASPRV1,ADM,SLC25A40,COL4A4,INSC,MYC,BMX,TFEB
GO:BP	response to stress	GO:0006950	FALSE	1.53E-21	20.8144	3948	106	40	78724	HK2,IRAK3,IL7R,MGST1,NDST1,GADD45A,RNF175,ABCD2,CEBPA,ABAT,WIPI1,RRAGD,CD163,LY9,SRPK1,FUT8,NRG1,KIAA0319,CXCR6,EPHA4,TLR2,CYP1B1,MAPK14,HSP90AB1,IL1R2,S1PR3,IL1R1,CBS,F5,SLC7A5,NR1D2,RNF135,DPP4,MTMR3,PTPRK,ADM,MCTP1,SRXN1,MYC,TFEB
GO:BP	multicellular organismal process	GO:0032501	FALSE	1.11E-20	19.9563	7322	106	50	78724	HK2,GPR171,IRAK3,IL7R,NDST1,TSHZ3,CLEC3B,CRYGS,EVL,PTS,GADD45A,ASPH,ABCD2,CDK5R1,CEBPA,FGF9,RAB13,ABAT,ATXN1L,TNFSF13,TRIB2,LY9,FUT8,NRG1,TCF4,KIAA0319,EPHA4,TLR2,CYP1B1,MAPK14,IL1R2,AATK,S1PR3,IL1R1,CBS,F5,SLC7A5,CCDC50,VSIG1,NR1D2,SIAH2,RNF135,NCEH1,DPP4,ADM,SLC25A40,COL4A4,INSC,MYC,TFEB
GO:BP	signaling	GO:0023052	FALSE	4.95E-20	19.3056	6515	106	47	78724	GPR171,IRAK3,IL7R,NDST1,TSHZ3,EVL,DLGAP3,GADD45A,ASPH,CDK5R1,OTUD3,CEBPA,FGF9,RAB13,ABAT,THEM4,TNFSF13,RRAGD,FGD4,SRPK1,FAM3B,FUT8,NRG1,KIAA0319,CXCR6,EPHA4,TLR2,CYP1B1,MAPK14,HSP90AB1,IL1R2,NMT2,S1PR3,IL1R1,CBS,IL13RA1,MPP1,NR1D2,SIAH2,RNF135,PTPRK,ADM,MCTP1,CDCA8,CD63,MYC,BMX
GO:BP	cell communication	GO:0007154	FALSE	5.81E-20	19.2358	6540	106	47	78724	GPR171,IRAK3,IL7R,NDST1,TSHZ3,EVL,DLGAP3,GADD45A,ASPH,CDK5R1,OTUD3,CEBPA,FGF9,RAB13,ABAT,THEM4,TNFSF13,RRAGD,FGD4,SRPK1,FAM3B,FUT8,NRG1,KIAA0319,CXCR6,EPHA4,TLR2,CYP1B1,MAPK14,HSP90AB1,IL1R2,NMT2,S1PR3,IL1R1,CBS,IL13RA1,MPP1,NR1D2,SIAH2,RNF135,PTPRK,ADM,MCTP1,CDCA8,CD63,MYC,BMX
GO:BP	signal transduction	GO:0007165	FALSE	1.38E-19	18.8611	6002	106	45	78724	GPR171,IRAK3,IL7R,NDST1,EVL,GADD45A,ASPH,CDK5R1,OTUD3,CEBPA,FGF9,RAB13,ABAT,THEM4,TNFSF13,RRAGD,FGD4,SRPK1,FAM3B,FUT8,NRG1,KIAA0319,CXCR6,EPHA4,TLR2,CYP1B1,MAPK14,HSP90AB1,IL1R2,NMT2,S1PR3,IL1R1,CBS,IL13RA1,MPP1,NR1D2,SIAH2,RNF135,PTPRK,ADM,MCTP1,CDCA8,CD63,MYC,BMX
GO:BP	primary metabolic process	GO:0044238	FALSE	1.40E-19	18.855	12342	106	61	78724	HK2,IRAK3,TIMP2,IL7R,NDST1,TSHZ3,PLBD1,ATF7IP2,CLEC3B,PTS,GADD45A,ASPH,RNF175,ABCD2,CDK5R1,OTUD3,CEBPA,FGF9,RPLP0,ABAT,THEM4,WIPI1,ST3GAL6,ATXN1L,TNFSF13,TRIB2,CRAT,SRPK1,FKBP9,FUT8,NRG1,TCF4,ZDHHC19,EPHA4,TLR2,CYP1B1,MAPK14,HSP90AB1,IL1R2,NMT2,AATK,MRPL13,ZNF532,GBE1,CBS,MPP1,NR1D2,SIAH2,RNF135,ASPRV1,NCEH1,DPP4,TMCC2,MTMR3,PTPRK,ADM,JDP2,MYC,HK3,BMX,TFEB
GO:BP	negative regulation of biological process	GO:0048519	FALSE	3.01E-17	16.5213	5834	106	42	78724	HK2,GPR171,IRAK3,TIMP2,IL7R,TSHZ3,EVL,GADD45A,ASPH,ABCD2,CDK5R1,OTUD3,CEBPA,FGF9,ABAT,THEM4,ATXN1L,RRAGD,TRIB2,SRPK1,NRG1,KIAA0319,EPHA4,TLR2,CYP1B1,MAPK14,HSP90AB1,IL1R2,MRPL13,S1PR3,GBE1,CBS,SLC7A5,NR1D2,SIAH2,DPP4,PTPRK,ADM,MCTP1,CDCA8,JDP2,MYC
GO:BP	positive regulation of biological process	GO:0048518	FALSE	5.31E-17	16.2751	6264	106	43	78724	HK2,IRAK3,IL7R,NDST1,TSHZ3,CLEC3B,EVL,GADD45A,ASPH,ABCD2,CDK5R1,CEBPA,FGF9,ABAT,WIPI1,ATXN1L,TNFSF13,RRAGD,TRIB2,LY9,SRPK1,NRG1,TCF4,ZDHHC19,KIAA0319,EPHA4,TLR2,CYP1B1,MAPK14,HSP90AB1,S1PR3,IL1R1,SLC7A5,IL13RA1,NR1D2,RNF135,DPP4,ADM,CDCA8,CD63,MYC,BMX,TFEB
GO:BP	negative regulation of cellular process	GO:0048523	FALSE	6.74E-17	16.1715	5629	106	41	78724	HK2,GPR171,IRAK3,TIMP2,IL7R,TSHZ3,EVL,GADD45A,ASPH,ABCD2,CDK5R1,OTUD3,CEBPA,FGF9,ABAT,THEM4,ATXN1L,RRAGD,TRIB2,NRG1,KIAA0319,EPHA4,TLR2,CYP1B1,MAPK14,HSP90AB1,IL1R2,MRPL13,S1PR3,GBE1,CBS,SLC7A5,NR1D2,SIAH2,DPP4,PTPRK,ADM,MCTP1,CDCA8,JDP2,MYC
GO:BP	regulation of metabolic process	GO:0019222	FALSE	7.65E-17	16.1161	7035	106	45	78724	HK2,IRAK3,TIMP2,IL7R,TSHZ3,ATF7IP2,CLEC3B,GADD45A,ASPH,ABCD2,CDK5R1,CEBPA,FGF9,ABAT,WIPI1,ATXN1L,TNFSF13,RRAGD,TRIB2,LY9,SRPK1,FUT8,NRG1,TCF4,ZDHHC19,EPHA4,TLR2,CYP1B1,MAPK14,HSP90AB1,IL1R2,MRPL13,S1PR3,ZNF532,IL1R1,SLC7A5,NR1D2,SIAH2,RNF135,MTMR3,PTPRK,ADM,JDP2,MYC,TFEB
GO:BP	response to chemical	GO:0042221	FALSE	1.47E-16	15.8323	3909	106	35	78724	HK2,IRAK3,TIMP2,IL7R,MGST1,ASPH,RNF175,CDK5R1,CEBPA,RAB13,ABAT,ST3GAL6,RRAGD,FUT8,NRG1,CXCR6,EPHA4,TLR2,CYP1B1,MAPK14,HSP90AB1,IL1R2,IL1R1,CBS,F5,SLC7A5,IL13RA1,MPP1,NR1D2,NCEH1,DPP4,PTPRK,ADM,SRXN1,MYC
GO:BP	regulation of response to stimulus	GO:0048583	FALSE	2.88E-16	15.5412	3993	106	35	78724	IRAK3,IL7R,NDST1,GADD45A,OTUD3,CEBPA,FGF9,ABAT,THEM4,TNFSF13,RRAGD,FGD4,FUT8,NRG1,KIAA0319,EPHA4,TLR2,CYP1B1,MAPK14,HSP90AB1,IL1R2,NMT2,IL1R1,CBS,MPP1,NR1D2,SIAH2,RNF135,DPP4,ADM,MCTP1,CDCA8,CD63,MYC,BMX
GO:BP	protein metabolic process	GO:0019538	FALSE	7.82E-16	15.1067	4721	106	37	78724	IRAK3,TIMP2,NDST1,CLEC3B,GADD45A,ASPH,RNF175,CDK5R1,OTUD3,CEBPA,FGF9,RPLP0,ST3GAL6,TRIB2,SRPK1,FKBP9,FUT8,NRG1,ZDHHC19,EPHA4,TLR2,CYP1B1,MAPK14,HSP90AB1,IL1R2,NMT2,AATK,MRPL13,SIAH2,RNF135,ASPRV1,DPP4,TMCC2,MTMR3,PTPRK,MYC,BMX
GO:BP	positive regulation of cellular process	GO:0048522	FALSE	3.22E-15	14.4921	5920	106	40	78724	IRAK3,IL7R,NDST1,TSHZ3,CLEC3B,EVL,GADD45A,ASPH,ABCD2,CDK5R1,CEBPA,FGF9,ABAT,WIPI1,ATXN1L,TNFSF13,RRAGD,TRIB2,LY9,NRG1,TCF4,ZDHHC19,KIAA0319,EPHA4,TLR2,CYP1B1,MAPK14,HSP90AB1,S1PR3,IL1R1,SLC7A5,IL13RA1,NR1D2,RNF135,DPP4,ADM,CDCA8,CD63,MYC,TFEB
GO:BP	biosynthetic process	GO:0009058	FALSE	3.47E-15	14.4603	10664	106	52	78724	IRAK3,IL7R,NDST1,TSHZ3,ATF7IP2,CLEC3B,PTS,GADD45A,ASPH,ABCD2,CDK5R1,CEBPA,FGF9,RPLP0,ABAT,ST3GAL6,ATXN1L,TNFSF13,TRIB2,LY9,SRPK1,FKBP9,FUT8,NRG1,TCF4,ZDHHC19,EPHA4,TLR2,CYP1B1,MAPK14,HSP90AB1,IL1R2,NMT2,MRPL13,S1PR3,ZNF532,GBE1,IL1R1,CBS,SLC7A5,NR1D2,SIAH2,RNF135,ASPRV1,DPP4,MTMR3,PTPRK,ADM,JDP2,MYC,BMX,TFEB
GO:BP	macromolecule metabolic process	GO:0043170	FALSE	3.66E-15	14.4361	12048	106	55	78724	IRAK3,TIMP2,IL7R,NDST1,TSHZ3,ATF7IP2,CLEC3B,GADD45A,ASPH,RNF175,ABCD2,CDK5R1,OTUD3,CEBPA,FGF9,RPLP0,WIPI1,ST3GAL6,ATXN1L,TNFSF13,TRIB2,LY9,SRPK1,FKBP9,FUT8,NRG1,TCF4,ZDHHC19,EPHA4,TLR2,CYP1B1,MAPK14,HSP90AB1,IL1R2,NMT2,AATK,MRPL13,S1PR3,ZNF532,GBE1,IL1R1,CBS,SLC7A5,NR1D2,SIAH2,RNF135,ASPRV1,DPP4,TMCC2,MTMR3,PTPRK,JDP2,MYC,BMX,TFEB
GO:BP	multicellular organism development	GO:0007275	FALSE	6.83E-15	14.1656	4727	106	36	78724	HK2,GPR171,IRAK3,IL7R,NDST1,CRYGS,EVL,PTS,GADD45A,ASPH,ABCD2,CDK5R1,CEBPA,FGF9,RAB13,ABAT,ATXN1L,TNFSF13,FUT8,NRG1,TCF4,KIAA0319,EPHA4,TLR2,CYP1B1,MAPK14,AATK,S1PR3,CBS,SLC7A5,SIAH2,ADM,COL4A4,INSC,MYC,TFEB
GO:BP	cellular component organization	GO:0016043	FALSE	2.71E-14	13.5673	8184	106	45	78724	HK2,IRAK3,STX17,IL7R,SPINK2,EVL,DLGAP3,GADD45A,ASPH,ABCD2,CDK5R1,CEBPA,RPLP0,RAB13,THEM4,WIPI1,ATXN1L,RSPH9,FGD4,SRPK1,NRG1,TCF4,KIAA0319,EPHA4,TLR2,CYP1B1,SEC31B,MAPK14,HSP90AB1,ATP8B4,KPNA3,SIAH2,RNF135,DPP4,MTMR3,PTPRK,ADM,MCTP1,CDCA8,JDP2,COL4A4,INSC,CD63,MYC,TFEB
GO:BP	regulation of multicellular organismal process	GO:0051239	FALSE	3.99E-14	13.3988	2956	106	29	78724	HK2,GPR171,IRAK3,IL7R,TSHZ3,EVL,GADD45A,ASPH,ABCD2,CEBPA,FGF9,ABAT,TNFSF13,TRIB2,LY9,NRG1,KIAA0319,EPHA4,TLR2,CYP1B1,MAPK14,IL1R2,S1PR3,IL1R1,SLC7A5,RNF135,DPP4,ADM,MYC
GO:BP	cellular component organization or biogenesis	GO:0071840	FALSE	7.09E-14	13.1496	8393	106	45	78724	HK2,IRAK3,STX17,IL7R,SPINK2,EVL,DLGAP3,GADD45A,ASPH,ABCD2,CDK5R1,CEBPA,RPLP0,RAB13,THEM4,WIPI1,ATXN1L,RSPH9,FGD4,SRPK1,NRG1,TCF4,KIAA0319,EPHA4,TLR2,CYP1B1,SEC31B,MAPK14,HSP90AB1,ATP8B4,KPNA3,SIAH2,RNF135,DPP4,MTMR3,PTPRK,ADM,MCTP1,CDCA8,JDP2,COL4A4,INSC,CD63,MYC,TFEB
GO:BP	regulation of biosynthetic process	GO:0009889	FALSE	9.17E-14	13.0374	5809	106	38	78724	IRAK3,IL7R,TSHZ3,ATF7IP2,CLEC3B,GADD45A,ASPH,ABCD2,CDK5R1,CEBPA,FGF9,ATXN1L,TNFSF13,TRIB2,LY9,SRPK1,FUT8,NRG1,TCF4,EPHA4,TLR2,CYP1B1,MAPK14,HSP90AB1,IL1R2,MRPL13,S1PR3,ZNF532,IL1R1,SLC7A5,NR1D2,SIAH2,RNF135,PTPRK,ADM,JDP2,MYC,TFEB
GO:BP	catabolic process	GO:0009056	FALSE	2.25E-13	12.6484	2639	106	27	78724	HK2,IRAK3,TIMP2,STX17,PLBD1,RNF175,ABCD2,CDK5R1,CEBPA,ABAT,WIPI1,RRAGD,TRIB2,CRAT,FUT8,ZDHHC19,EPHA4,CYP1B1,MAPK14,HSP90AB1,CBS,SLC7A5,SIAH2,NCEH1,MTMR3,HK3,TFEB
GO:BP	regulation of cell communication	GO:0010646	FALSE	3.40E-13	12.4689	3486	106	30	78724	IRAK3,IL7R,NDST1,TSHZ3,DLGAP3,GADD45A,ASPH,OTUD3,FGF9,ABAT,THEM4,RRAGD,FGD4,NRG1,KIAA0319,EPHA4,TLR2,CYP1B1,MAPK14,HSP90AB1,IL1R2,NMT2,IL1R1,CBS,SIAH2,ADM,MCTP1,CDCA8,CD63,MYC
GO:BP	regulation of biological quality	GO:0065008	FALSE	3.57E-13	12.4471	2947	106	28	78724	HK2,IL7R,TSHZ3,EVL,ASPH,CDK5R1,OTUD3,ABAT,THEM4,FGD4,FAM3B,NRG1,KIAA0319,CXCR6,EPHA4,TLR2,CYP1B1,MAPK14,HSP90AB1,ATP8B4,S1PR3,CBS,F5,SLC7A5,DPP4,ADM,MCTP1,INSC
GO:BP	intracellular signal transduction	GO:0035556	FALSE	4.16E-13	12.3805	2965	106	28	78724	IRAK3,NDST1,GADD45A,ASPH,OTUD3,CEBPA,FGF9,RAB13,THEM4,RRAGD,FGD4,SRPK1,NRG1,KIAA0319,CXCR6,EPHA4,TLR2,CYP1B1,MAPK14,CBS,NR1D2,SIAH2,RNF135,ADM,MCTP1,CDCA8,MYC,BMX
GO:BP	regulation of macromolecule metabolic process	GO:0060255	FALSE	5.29E-13	12.2766	6492	106	39	78724	IRAK3,TIMP2,IL7R,TSHZ3,ATF7IP2,CLEC3B,GADD45A,ASPH,ABCD2,CDK5R1,CEBPA,FGF9,ATXN1L,TNFSF13,TRIB2,LY9,SRPK1,FUT8,NRG1,TCF4,EPHA4,TLR2,CYP1B1,MAPK14,HSP90AB1,IL1R2,MRPL13,S1PR3,ZNF532,IL1R1,SLC7A5,NR1D2,SIAH2,RNF135,MTMR3,PTPRK,JDP2,MYC,TFEB
GO:BP	regulation of gene expression	GO:0010468	FALSE	9.76E-13	12.0105	5536	106	36	78724	IRAK3,IL7R,TSHZ3,ATF7IP2,CLEC3B,GADD45A,ASPH,ABCD2,CDK5R1,CEBPA,FGF9,ATXN1L,TNFSF13,TRIB2,LY9,SRPK1,FUT8,NRG1,TCF4,EPHA4,TLR2,CYP1B1,MAPK14,IL1R2,MRPL13,S1PR3,ZNF532,IL1R1,SLC7A5,NR1D2,SIAH2,RNF135,PTPRK,JDP2,MYC,TFEB
GO:BP	cell surface receptor signaling pathway	GO:0007166	FALSE	1.12E-12	11.949	2819	106	27	78724	GPR171,IRAK3,IL7R,NDST1,EVL,GADD45A,CDK5R1,CEBPA,FGF9,ABAT,FUT8,NRG1,KIAA0319,CXCR6,EPHA4,TLR2,CYP1B1,MAPK14,HSP90AB1,IL1R2,S1PR3,IL1R1,IL13RA1,SIAH2,PTPRK,CD63,BMX
GO:BP	regulation of macromolecule biosynthetic process	GO:0010556	FALSE	1.77E-12	11.7509	5644	106	36	78724	IRAK3,IL7R,TSHZ3,ATF7IP2,CLEC3B,GADD45A,ASPH,ABCD2,CDK5R1,CEBPA,FGF9,ATXN1L,TNFSF13,TRIB2,LY9,SRPK1,FUT8,NRG1,TCF4,EPHA4,TLR2,CYP1B1,MAPK14,IL1R2,MRPL13,S1PR3,ZNF532,IL1R1,SLC7A5,NR1D2,SIAH2,RNF135,PTPRK,JDP2,MYC,TFEB
GO:BP	macromolecule biosynthetic process	GO:0009059	FALSE	2.35E-12	11.6289	9643	106	46	78724	IRAK3,IL7R,NDST1,TSHZ3,ATF7IP2,CLEC3B,GADD45A,ASPH,ABCD2,CDK5R1,CEBPA,FGF9,RPLP0,ST3GAL6,ATXN1L,TNFSF13,TRIB2,LY9,SRPK1,FKBP9,FUT8,NRG1,TCF4,ZDHHC19,EPHA4,TLR2,CYP1B1,MAPK14,HSP90AB1,IL1R2,NMT2,MRPL13,S1PR3,ZNF532,GBE1,IL1R1,SLC7A5,NR1D2,SIAH2,RNF135,ASPRV1,DPP4,PTPRK,JDP2,MYC,TFEB
GO:BP	regulation of signaling	GO:0023051	FALSE	2.73E-12	11.5641	3478	106	29	78724	IRAK3,IL7R,NDST1,TSHZ3,DLGAP3,GADD45A,OTUD3,FGF9,ABAT,THEM4,RRAGD,FGD4,NRG1,KIAA0319,EPHA4,TLR2,CYP1B1,MAPK14,HSP90AB1,IL1R2,NMT2,IL1R1,CBS,SIAH2,ADM,MCTP1,CDCA8,CD63,MYC
GO:BP	regulation of primary metabolic process	GO:0080090	FALSE	2.97E-12	11.527	5390	106	35	78724	IRAK3,TIMP2,IL7R,TSHZ3,ATF7IP2,CLEC3B,GADD45A,ASPH,ABCD2,CDK5R1,CEBPA,FGF9,ABAT,ATXN1L,TNFSF13,TRIB2,SRPK1,NRG1,TCF4,EPHA4,TLR2,CYP1B1,MAPK14,HSP90AB1,IL1R2,MRPL13,ZNF532,NR1D2,SIAH2,MTMR3,PTPRK,ADM,JDP2,MYC,TFEB
GO:BP	localization	GO:0051179	FALSE	7.34E-12	11.1343	5555	106	35	78724	HK2,STX17,MGST1,ASPH,ABCD2,CDK5R1,FGF9,RAB13,ABAT,THEM4,WIPI1,RRAGD,CD163,FAM3B,NRG1,ZDHHC19,ANO10,TLR2,SEC31B,SLC22A15,MAPK14,HSP90AB1,NDUFA4,ATP8B4,SLC7A5,KPNA3,DPP4,PTPRK,ADM,SLC25A40,MCTP1,CDCA8,INSC,CD63,TFEB
GO:BP	system development	GO:0048731	FALSE	1.83E-11	10.7381	4053	106	30	78724	HK2,IRAK3,IL7R,NDST1,CRYGS,EVL,PTS,GADD45A,ABCD2,CDK5R1,CEBPA,FGF9,RAB13,ABAT,ATXN1L,TNFSF13,NRG1,TCF4,KIAA0319,EPHA4,TLR2,CYP1B1,MAPK14,AATK,CBS,SLC7A5,ADM,COL4A4,INSC,MYC
GO:BP	response to external stimulus	GO:0009605	FALSE	2.75E-11	10.5601	2415	106	24	78724	IRAK3,IL7R,GADD45A,ABCD2,CEBPA,RAB13,LY9,SRPK1,NRG1,KIAA0319,CXCR6,EPHA4,TLR2,MAPK14,NMT2,IL1R1,SLC7A5,MPP1,NR1D2,RNF135,DPP4,ADM,CD63,TFEB
GO:BP	regulation of developmental process	GO:0050793	FALSE	4.00E-11	10.3982	2457	106	24	78724	HK2,GPR171,IL7R,GADD45A,CDK5R1,CEBPA,FGF9,TNFSF13,TRIB2,FGD4,NRG1,TCF4,KIAA0319,EPHA4,TLR2,CYP1B1,MAPK14,HSP90AB1,S1PR3,SLC7A5,NR1D2,ADM,JDP2,MYC
GO:BP	positive regulation of metabolic process	GO:0009893	FALSE	5.09E-11	10.2936	3597	106	28	78724	IRAK3,IL7R,CLEC3B,GADD45A,ASPH,ABCD2,CEBPA,FGF9,ABAT,WIPI1,TNFSF13,TRIB2,LY9,NRG1,TCF4,ZDHHC19,EPHA4,TLR2,CYP1B1,MAPK14,HSP90AB1,IL1R1,SLC7A5,NR1D2,RNF135,ADM,MYC,TFEB
GO:BP	regulation of signal transduction	GO:0009966	FALSE	5.68E-11	10.2453	3034	106	26	78724	IRAK3,IL7R,NDST1,GADD45A,OTUD3,FGF9,ABAT,THEM4,RRAGD,FGD4,NRG1,KIAA0319,EPHA4,TLR2,CYP1B1,MAPK14,HSP90AB1,IL1R2,NMT2,IL1R1,CBS,SIAH2,ADM,CDCA8,CD63,MYC
GO:BP	animal organ development	GO:0048513	FALSE	8.34E-11	10.0787	3085	106	26	78724	HK2,IL7R,NDST1,CLEC3B,CRYGS,EVL,CDK5R1,CEBPA,FGF9,RAB13,ABAT,ATXN1L,NRG1,EPHA4,CYP1B1,MAPK14,HSP90AB1,AATK,CBS,SLC7A5,NR1D2,ASPRV1,ADM,COL4A4,MYC,TFEB
GO:BP	cellular response to chemical stimulus	GO:0070887	FALSE	3.33E-10	9.47807	2192	106	22	78724	IRAK3,MGST1,ASPH,CDK5R1,CEBPA,RAB13,RRAGD,FUT8,CXCR6,EPHA4,TLR2,CYP1B1,MAPK14,CBS,SLC7A5,MPP1,NR1D2,NCEH1,DPP4,PTPRK,SRXN1,MYC
GO:BP	establishment of localization	GO:0051234	FALSE	4.48E-10	9.34866	4928	106	31	78724	HK2,STX17,MGST1,ASPH,ABCD2,CDK5R1,FGF9,RAB13,ABAT,THEM4,WIPI1,CD163,FAM3B,NRG1,ZDHHC19,ANO10,TLR2,SEC31B,SLC22A15,MAPK14,NDUFA4,ATP8B4,SLC7A5,KPNA3,DPP4,ADM,SLC25A40,MCTP1,CDCA8,INSC,CD63
GO:BP	regulation of cell differentiation	GO:0045595	FALSE	7.65E-10	9.1165	1576	106	19	78724	GPR171,IL7R,CDK5R1,CEBPA,FGF9,TRIB2,NRG1,TCF4,KIAA0319,EPHA4,TLR2,MAPK14,HSP90AB1,S1PR3,SLC7A5,NR1D2,ADM,JDP2,MYC
GO:BP	cellular response to stress	GO:0033554	FALSE	1.03E-09	8.98651	1830	106	20	78724	MGST1,GADD45A,RNF175,CEBPA,WIPI1,RRAGD,FUT8,KIAA0319,EPHA4,CYP1B1,MAPK14,HSP90AB1,CBS,SLC7A5,MTMR3,PTPRK,ADM,SRXN1,MYC,TFEB
GO:BP	gene expression	GO:0010467	FALSE	1.85E-09	8.73308	9224	106	41	78724	IRAK3,IL7R,TSHZ3,ATF7IP2,CLEC3B,GADD45A,ASPH,ABCD2,CDK5R1,CEBPA,FGF9,RPLP0,ATXN1L,TNFSF13,TRIB2,LY9,SRPK1,FKBP9,FUT8,NRG1,TCF4,EPHA4,TLR2,CYP1B1,MAPK14,HSP90AB1,IL1R2,MRPL13,S1PR3,ZNF532,IL1R1,SLC7A5,NR1D2,SIAH2,RNF135,ASPRV1,DPP4,PTPRK,JDP2,MYC,TFEB
GO:BP	positive regulation of multicellular organismal process	GO:0051240	FALSE	2.03E-09	8.69285	1667	106	19	78724	HK2,IRAK3,IL7R,CEBPA,FGF9,ABAT,TNFSF13,LY9,NRG1,EPHA4,TLR2,CYP1B1,MAPK14,IL1R1,SLC7A5,RNF135,DPP4,ADM,MYC
GO:BP	intracellular signaling cassette	GO:0141124	FALSE	2.28E-09	8.64157	1912	106	20	78724	IRAK3,NDST1,GADD45A,ASPH,OTUD3,CEBPA,FGF9,THEM4,FGD4,NRG1,KIAA0319,CXCR6,EPHA4,TLR2,MAPK14,CBS,SIAH2,ADM,MCTP1,MYC
GO:BP	macromolecule modification	GO:0043412	FALSE	3.46E-09	8.46034	3030	106	24	78724	IRAK3,GADD45A,ASPH,CDK5R1,OTUD3,FGF9,ST3GAL6,TRIB2,SRPK1,FUT8,NRG1,ZDHHC19,EPHA4,TLR2,CYP1B1,MAPK14,HSP90AB1,NMT2,AATK,SIAH2,RNF135,MTMR3,PTPRK,BMX
GO:BP	transport	GO:0006810	FALSE	6.80E-09	8.16756	4407	106	28	78724	HK2,STX17,MGST1,ASPH,ABCD2,CDK5R1,FGF9,RAB13,ABAT,THEM4,WIPI1,CD163,FAM3B,NRG1,ANO10,TLR2,SEC31B,SLC22A15,MAPK14,NDUFA4,ATP8B4,SLC7A5,KPNA3,DPP4,ADM,SLC25A40,MCTP1,CD63
GO:BP	protein modification process	GO:0036211	FALSE	7.24E-09	8.14011	2846	106	23	78724	IRAK3,GADD45A,ASPH,CDK5R1,OTUD3,FGF9,ST3GAL6,TRIB2,SRPK1,FUT8,NRG1,ZDHHC19,EPHA4,TLR2,MAPK14,HSP90AB1,NMT2,AATK,SIAH2,RNF135,MTMR3,PTPRK,BMX
GO:BP	cell differentiation	GO:0030154	FALSE	7.98E-09	8.09791	4437	106	28	78724	GPR171,IL7R,SPINK2,CDK5R1,CEBPA,FGF9,RAB13,ATXN1L,TRIB2,LY9,SRPK1,NRG1,TCF4,KIAA0319,EPHA4,TLR2,MAPK14,HSP90AB1,S1PR3,SLC7A5,VSIG1,NR1D2,ADM,SLC25A40,JDP2,INSC,CD63,MYC
GO:BP	cellular developmental process	GO:0048869	FALSE	8.02E-09	8.0956	4438	106	28	78724	GPR171,IL7R,SPINK2,CDK5R1,CEBPA,FGF9,RAB13,ATXN1L,TRIB2,LY9,SRPK1,NRG1,TCF4,KIAA0319,EPHA4,TLR2,MAPK14,HSP90AB1,S1PR3,SLC7A5,VSIG1,NR1D2,ADM,SLC25A40,JDP2,INSC,CD63,MYC
GO:BP	defense response	GO:0006952	FALSE	1.25E-08	7.90174	1853	106	19	78724	IRAK3,IL7R,NDST1,ABCD2,CEBPA,CD163,LY9,SRPK1,CXCR6,TLR2,MAPK14,IL1R2,S1PR3,IL1R1,NR1D2,RNF135,DPP4,ADM,TFEB
GO:BP	anatomical structure morphogenesis	GO:0009653	FALSE	2.14E-08	7.66868	2713	106	22	78724	HK2,IL7R,NDST1,CRYGS,SPINK2,EVL,GADD45A,ASPH,CDK5R1,FGF9,FGD4,NRG1,KIAA0319,EPHA4,TLR2,CYP1B1,MAPK14,S1PR3,CBS,VSIG1,ADM,MYC
GO:BP	apoptotic process	GO:0006915	FALSE	2.36E-08	7.62679	1923	106	19	78724	HK2,IL7R,GADD45A,CDK5R1,THEM4,FAM3B,NRG1,EPHA4,TLR2,CYP1B1,MAPK14,HSP90AB1,GBE1,CBS,SLC7A5,SIAH2,ADM,MYC,BMX
GO:BP	regulation of cell population proliferation	GO:0042127	FALSE	2.45E-08	7.61062	1685	106	18	78724	IL7R,ASPH,CEBPA,FGF9,ATXN1L,TNFSF13,NRG1,EPHA4,TLR2,CYP1B1,MAPK14,S1PR3,SLC7A5,IL13RA1,DPP4,PTPRK,ADM,MYC
GO:BP	negative regulation of metabolic process	GO:0009892	FALSE	3.26E-08	7.48737	3375	106	24	78724	HK2,IRAK3,TIMP2,TSHZ3,GADD45A,ABCD2,CDK5R1,CEBPA,FGF9,ATXN1L,RRAGD,TRIB2,NRG1,EPHA4,MAPK14,HSP90AB1,IL1R2,MRPL13,SLC7A5,NR1D2,SIAH2,PTPRK,JDP2,MYC
GO:BP	programmed cell death	GO:0012501	FALSE	4.12E-08	7.38512	1987	106	19	78724	HK2,IL7R,GADD45A,CDK5R1,THEM4,FAM3B,NRG1,EPHA4,TLR2,CYP1B1,MAPK14,HSP90AB1,GBE1,CBS,SLC7A5,SIAH2,ADM,MYC,BMX
GO:BP	cell death	GO:0008219	FALSE	4.26E-08	7.37031	1991	106	19	78724	HK2,IL7R,GADD45A,CDK5R1,THEM4,FAM3B,NRG1,EPHA4,TLR2,CYP1B1,MAPK14,HSP90AB1,GBE1,CBS,SLC7A5,SIAH2,ADM,MYC,BMX
GO:BP	cell population proliferation	GO:0008283	FALSE	5.22E-08	7.28214	2015	106	19	78724	IL7R,NDST1,ASPH,CEBPA,FGF9,ATXN1L,TNFSF13,NRG1,EPHA4,TLR2,CYP1B1,MAPK14,S1PR3,SLC7A5,IL13RA1,DPP4,PTPRK,ADM,MYC
GO:BP	cell migration	GO:0016477	FALSE	5.46E-08	7.26309	1534	106	17	78724	EVL,GADD45A,CDK5R1,FGF9,RAB13,FUT8,KIAA0319,CXCR6,EPHA4,CYP1B1,IL1R1,MPP1,S100P,DPP4,PTPRK,MCTP1,CD63
GO:BP	cell motility	GO:0048870	FALSE	6.71E-08	7.17306	1793	106	18	78724	EVL,GADD45A,CDK5R1,FGF9,RAB13,RSPH9,FUT8,KIAA0319,CXCR6,EPHA4,CYP1B1,IL1R1,MPP1,S100P,DPP4,PTPRK,MCTP1,CD63
GO:BP	response to cytokine	GO:0034097	FALSE	8.51E-08	7.07	947	106	14	78724	HK2,IRAK3,TIMP2,IL7R,CEBPA,ST3GAL6,CXCR6,TLR2,CYP1B1,MAPK14,HSP90AB1,IL1R2,IL1R1,IL13RA1
GO:BP	response to abiotic stimulus	GO:0009628	FALSE	8.72E-08	7.05924	1144	106	15	78724	HK2,GADD45A,ABAT,KIAA0319,EPHA4,TLR2,MAPK14,HSP90AB1,NMT2,CBS,SLC7A5,DPP4,PTPRK,ADM,MYC
GO:BP	response to peptide	GO:1901652	FALSE	1.04E-07	6.98094	962	106	14	78724	HK2,IRAK3,TIMP2,IL7R,CEBPA,ST3GAL6,CXCR6,TLR2,CYP1B1,MAPK14,HSP90AB1,IL1R2,IL1R1,IL13RA1
GO:BP	positive regulation of biosynthetic process	GO:0009891	FALSE	1.41E-07	6.85138	2696	106	21	78724	IRAK3,IL7R,CLEC3B,ASPH,ABCD2,CEBPA,FGF9,TNFSF13,LY9,TCF4,TLR2,CYP1B1,MAPK14,HSP90AB1,IL1R1,SLC7A5,NR1D2,RNF135,ADM,MYC,TFEB
GO:BP	regulation of multicellular organismal development	GO:2000026	FALSE	1.69E-07	6.77212	1418	106	16	78724	HK2,GPR171,IL7R,GADD45A,CEBPA,FGF9,NRG1,KIAA0319,EPHA4,TLR2,CYP1B1,MAPK14,S1PR3,SLC7A5,ADM,MYC
GO:BP	response to nutrient levels	GO:0031667	FALSE	2.24E-07	6.64924	510	106	11	78724	OTUD3,WIPI1,RRAGD,CYP1B1,MAPK14,CBS,F5,SLC7A5,MTMR3,ADM,TFEB
GO:BP	regulation of catabolic process	GO:0009894	FALSE	2.88E-07	6.54104	1040	106	14	78724	IRAK3,TIMP2,ABCD2,CDK5R1,CEBPA,WIPI1,RRAGD,TRIB2,ZDHHC19,MAPK14,HSP90AB1,SLC7A5,MTMR3,TFEB
GO:BP	cellular response to cytokine stimulus	GO:0071345	FALSE	3.07E-07	6.51245	854	106	13	78724	HK2,IRAK3,IL7R,CEBPA,ST3GAL6,CXCR6,TLR2,CYP1B1,MAPK14,HSP90AB1,IL1R2,IL1R1,IL13RA1
GO:BP	negative regulation of macromolecule metabolic process	GO:0010605	FALSE	3.82E-07	6.41812	3157	106	22	78724	IRAK3,TIMP2,TSHZ3,GADD45A,ABCD2,CDK5R1,CEBPA,FGF9,ATXN1L,TRIB2,NRG1,EPHA4,MAPK14,HSP90AB1,IL1R2,MRPL13,SLC7A5,NR1D2,SIAH2,PTPRK,JDP2,MYC
GO:BP	response to nitrogen compound	GO:1901698	FALSE	4.69E-07	6.32925	1080	106	14	78724	IRAK3,ASPH,RNF175,CDK5R1,RAB13,ABAT,RRAGD,EPHA4,TLR2,CYP1B1,MAPK14,CBS,SLC7A5,ADM
GO:BP	nervous system development	GO:0007399	FALSE	5.41E-07	6.26663	2604	106	20	78724	NDST1,EVL,PTS,ABCD2,CDK5R1,FGF9,RAB13,ABAT,ATXN1L,NRG1,TCF4,KIAA0319,EPHA4,TLR2,CYP1B1,AATK,CBS,SLC7A5,ADM,INSC
GO:BP	positive regulation of response to stimulus	GO:0048584	FALSE	6.00E-07	6.22211	2331	106	19	78724	IRAK3,IL7R,NDST1,GADD45A,CEBPA,FGF9,TNFSF13,RRAGD,NRG1,KIAA0319,TLR2,CYP1B1,HSP90AB1,IL1R1,RNF135,CDCA8,CD63,MYC,BMX
GO:BP	positive regulation of cell communication	GO:0010647	FALSE	6.02E-07	6.2202	1795	106	17	78724	IL7R,NDST1,TSHZ3,GADD45A,FGF9,ABAT,RRAGD,NRG1,KIAA0319,EPHA4,TLR2,CYP1B1,HSP90AB1,IL1R1,CDCA8,CD63,MYC
GO:BP	positive regulation of signaling	GO:0023056	FALSE	6.07E-07	6.21654	1796	106	17	78724	IL7R,NDST1,TSHZ3,GADD45A,FGF9,ABAT,RRAGD,NRG1,KIAA0319,EPHA4,TLR2,CYP1B1,HSP90AB1,IL1R1,CDCA8,CD63,MYC
GO:BP	organelle organization	GO:0006996	FALSE	7.23E-07	6.14061	3594	106	23	78724	HK2,STX17,SPINK2,EVL,GADD45A,ABCD2,CDK5R1,CEBPA,RPLP0,RAB13,THEM4,WIPI1,RSPH9,FGD4,SRPK1,SEC31B,HSP90AB1,ATP8B4,MTMR3,CDCA8,INSC,MYC,TFEB
GO:BP	positive regulation of developmental process	GO:0051094	FALSE	7.89E-07	6.10311	1343	106	15	78724	HK2,IL7R,CEBPA,FGF9,TNFSF13,NRG1,TCF4,EPHA4,TLR2,CYP1B1,MAPK14,HSP90AB1,SLC7A5,ADM,MYC
GO:BP	regulation of nucleobase-containing compound metabolic process	GO:0019219	FALSE	9.66E-07	6.01483	3990	106	24	78724	IRAK3,IL7R,TSHZ3,ATF7IP2,GADD45A,ASPH,CDK5R1,CEBPA,FGF9,ATXN1L,TNFSF13,SRPK1,NRG1,TCF4,TLR2,CYP1B1,MAPK14,ZNF532,NR1D2,SIAH2,PTPRK,JDP2,MYC,TFEB
GO:BP	regulation of protein metabolic process	GO:0051246	FALSE	9.89E-07	6.00465	1855	106	17	78724	IRAK3,TIMP2,CLEC3B,GADD45A,ASPH,CDK5R1,CEBPA,FGF9,TRIB2,NRG1,EPHA4,CYP1B1,HSP90AB1,IL1R2,MRPL13,SIAH2,MYC
GO:BP	phosphate-containing compound metabolic process	GO:0006796	FALSE	1.01909E-06	5.99179	2407	106	19	78724	HK2,IRAK3,PLBD1,GADD45A,CDK5R1,FGF9,TRIB2,SRPK1,FUT8,NRG1,EPHA4,TLR2,MAPK14,AATK,MPP1,MTMR3,PTPRK,HK3,BMX
GO:BP	cellular localization	GO:0051641	FALSE	1.03257E-06	5.98608	3661	106	23	78724	HK2,STX17,ASPH,ABCD2,CDK5R1,FGF9,RAB13,ABAT,WIPI1,RRAGD,FAM3B,NRG1,ZDHHC19,TLR2,SEC31B,MAPK14,HSP90AB1,KPNA3,PTPRK,MCTP1,CDCA8,INSC,CD63
GO:BP	phosphorus metabolic process	GO:0006793	FALSE	1.04023E-06	5.98287	2410	106	19	78724	HK2,IRAK3,PLBD1,GADD45A,CDK5R1,FGF9,TRIB2,SRPK1,FUT8,NRG1,EPHA4,TLR2,MAPK14,AATK,MPP1,MTMR3,PTPRK,HK3,BMX
GO:BP	positive regulation of cell population proliferation	GO:0008284	FALSE	1.17219E-06	5.931	954	106	13	78724	IL7R,FGF9,ATXN1L,TNFSF13,NRG1,EPHA4,MAPK14,S1PR3,SLC7A5,IL13RA1,DPP4,ADM,MYC
GO:BP	negative regulation of macromolecule biosynthetic process	GO:0010558	FALSE	1.34169E-06	5.87235	2745	106	20	78724	IRAK3,TSHZ3,GADD45A,ABCD2,CDK5R1,CEBPA,FGF9,ATXN1L,TRIB2,NRG1,EPHA4,MAPK14,IL1R2,MRPL13,SLC7A5,NR1D2,SIAH2,PTPRK,JDP2,MYC
GO:BP	regulation of cytokine production	GO:0001817	FALSE	1.4559E-06	5.83687	781	106	12	78724	IRAK3,ABCD2,TRIB2,LY9,TLR2,CYP1B1,MAPK14,IL1R2,S1PR3,IL1R1,SLC7A5,RNF135
GO:BP	cytokine production	GO:0001816	FALSE	1.5864E-06	5.79959	787	106	12	78724	IRAK3,ABCD2,TRIB2,LY9,TLR2,CYP1B1,MAPK14,IL1R2,S1PR3,IL1R1,SLC7A5,RNF135
GO:BP	response to oxygen-containing compound	GO:1901700	FALSE	1.76656E-06	5.75287	1669	106	16	78724	IRAK3,MGST1,ASPH,CDK5R1,RAB13,ABAT,RRAGD,EPHA4,TLR2,CYP1B1,MAPK14,CBS,F5,SLC7A5,PTPRK,ADM
GO:BP	negative regulation of response to stimulus	GO:0048585	FALSE	1.93985E-06	5.71223	1680	106	16	78724	IRAK3,IL7R,OTUD3,FGF9,THEM4,NRG1,KIAA0319,EPHA4,MAPK14,IL1R2,NR1D2,SIAH2,DPP4,ADM,MCTP1,MYC
GO:BP	negative regulation of biosynthetic process	GO:0009890	FALSE	2.03877E-06	5.69063	2813	106	20	78724	IRAK3,TSHZ3,GADD45A,ABCD2,CDK5R1,CEBPA,FGF9,ATXN1L,TRIB2,NRG1,EPHA4,MAPK14,IL1R2,MRPL13,SLC7A5,NR1D2,SIAH2,PTPRK,JDP2,MYC
GO:BP	positive regulation of gene expression	GO:0010628	FALSE	2.05509E-06	5.68717	1212	106	14	78724	IRAK3,IL7R,CLEC3B,CEBPA,FGF9,TNFSF13,LY9,TLR2,CYP1B1,MAPK14,IL1R1,SLC7A5,RNF135,MYC
GO:BP	response to oxygen levels	GO:0070482	FALSE	2.19268E-06	5.65902	344	106	9	78724	HK2,ABAT,EPHA4,TLR2,CBS,SLC7A5,DPP4,ADM,MYC
GO:BP	immune system process	GO:0002376	FALSE	2.88601E-06	5.5397	2871	106	20	78724	GPR171,IRAK3,IL7R,CEBPA,TNFSF13,LY9,SRPK1,CXCR6,TLR2,MAPK14,IL1R2,IL1R1,SLC7A5,MPP1,RNF135,DPP4,SLC25A40,MYC,BMX,TFEB
GO:BP	cell development	GO:0048468	FALSE	2.97261E-06	5.52686	2876	106	20	78724	GPR171,IL7R,SPINK2,CDK5R1,CEBPA,RAB13,ATXN1L,LY9,SRPK1,NRG1,KIAA0319,EPHA4,TLR2,MAPK14,S1PR3,SLC7A5,VSIG1,ADM,SLC25A40,MYC
GO:BP	locomotion	GO:0040011	FALSE	3.20173E-06	5.49462	1255	106	14	78724	EVL,GADD45A,FGF9,RAB13,NRG1,CXCR6,EPHA4,CYP1B1,MAPK14,IL1R1,MPP1,DPP4,PTPRK,MCTP1
GO:BP	macromolecule localization	GO:0033036	FALSE	3.56003E-06	5.44855	3228	106	21	78724	HK2,STX17,ASPH,ABCD2,CDK5R1,FGF9,RAB13,ABAT,WIPI1,RRAGD,FAM3B,ZDHHC19,TLR2,SEC31B,MAPK14,HSP90AB1,ATP8B4,KPNA3,PTPRK,INSC,CD63
GO:BP	small molecule metabolic process	GO:0044281	FALSE	4.26673E-06	5.3699	1776	106	16	78724	HK2,PTS,ABCD2,CEBPA,ABAT,THEM4,CRAT,FUT8,TLR2,CYP1B1,MAPK14,CBS,MPP1,NCEH1,ADM,HK3
GO:BP	inflammatory response	GO:0006954	FALSE	4.38466E-06	5.35806	862	106	12	78724	NDST1,ABCD2,CEBPA,CD163,CXCR6,TLR2,MAPK14,IL1R2,S1PR3,IL1R1,NR1D2,ADM
GO:BP	positive regulation of macromolecule metabolic process	GO:0010604	FALSE	4.92264E-06	5.3078	3288	106	21	78724	IRAK3,IL7R,CLEC3B,ASPH,CEBPA,FGF9,TNFSF13,TRIB2,LY9,NRG1,TCF4,EPHA4,TLR2,CYP1B1,MAPK14,IL1R1,SLC7A5,NR1D2,RNF135,MYC,TFEB
GO:BP	phosphorylation	GO:0016310	FALSE	6.06593E-06	5.2171	1320	106	14	78724	HK2,IRAK3,GADD45A,CDK5R1,FGF9,TRIB2,SRPK1,NRG1,EPHA4,TLR2,MAPK14,AATK,HK3,BMX
GO:BP	regulation of RNA metabolic process	GO:0051252	FALSE	6.69869E-06	5.17401	3687	106	22	78724	IRAK3,TSHZ3,ATF7IP2,GADD45A,ASPH,CDK5R1,CEBPA,FGF9,ATXN1L,SRPK1,NRG1,TCF4,TLR2,CYP1B1,MAPK14,ZNF532,NR1D2,SIAH2,PTPRK,JDP2,MYC,TFEB
GO:BP	regulation of DNA-templated transcription	GO:0006355	FALSE	9.26407E-06	5.0332	3409	106	21	78724	IRAK3,TSHZ3,ATF7IP2,GADD45A,ASPH,CDK5R1,CEBPA,FGF9,ATXN1L,NRG1,TCF4,TLR2,CYP1B1,MAPK14,ZNF532,NR1D2,SIAH2,PTPRK,JDP2,MYC,TFEB
GO:BP	protein localization	GO:0008104	FALSE	1.00411E-05	4.99822	2770	106	19	78724	HK2,STX17,ASPH,CDK5R1,FGF9,RAB13,ABAT,WIPI1,RRAGD,FAM3B,ZDHHC19,TLR2,SEC31B,MAPK14,HSP90AB1,KPNA3,PTPRK,INSC,CD63
GO:BP	regulation of RNA biosynthetic process	GO:2001141	FALSE	1.02057E-05	4.99116	3428	106	21	78724	IRAK3,TSHZ3,ATF7IP2,GADD45A,ASPH,CDK5R1,CEBPA,FGF9,ATXN1L,NRG1,TCF4,TLR2,CYP1B1,MAPK14,ZNF532,NR1D2,SIAH2,PTPRK,JDP2,MYC,TFEB
GO:BP	cellular macromolecule localization	GO:0070727	FALSE	1.07634E-05	4.96805	2782	106	19	78724	HK2,STX17,ASPH,CDK5R1,FGF9,RAB13,ABAT,WIPI1,RRAGD,FAM3B,ZDHHC19,TLR2,SEC31B,MAPK14,HSP90AB1,KPNA3,PTPRK,INSC,CD63
GO:BP	regulation of intracellular signal transduction	GO:1902531	FALSE	1.61787E-05	4.79106	1953	106	16	78724	IRAK3,NDST1,GADD45A,OTUD3,FGF9,THEM4,RRAGD,FGD4,NRG1,KIAA0319,EPHA4,TLR2,MAPK14,CBS,CDCA8,MYC
GO:BP	response to hypoxia	GO:0001666	FALSE	1.7236E-05	4.76356	302	106	8	78724	HK2,ABAT,EPHA4,TLR2,CBS,DPP4,ADM,MYC
GO:BP	DNA-templated transcription	GO:0006351	FALSE	1.86237E-05	4.72993	3549	106	21	78724	IRAK3,TSHZ3,ATF7IP2,GADD45A,ASPH,CDK5R1,CEBPA,FGF9,ATXN1L,NRG1,TCF4,TLR2,CYP1B1,MAPK14,ZNF532,NR1D2,SIAH2,PTPRK,JDP2,MYC,TFEB
GO:BP	positive regulation of macromolecule biosynthetic process	GO:0010557	FALSE	2.22406E-05	4.65285	2593	106	18	78724	IRAK3,IL7R,CLEC3B,ASPH,CEBPA,FGF9,TNFSF13,LY9,TCF4,TLR2,CYP1B1,MAPK14,IL1R1,SLC7A5,NR1D2,RNF135,MYC,TFEB
GO:BP	response to decreased oxygen levels	GO:0036293	FALSE	2.44886E-05	4.61104	316	106	8	78724	HK2,ABAT,EPHA4,TLR2,CBS,DPP4,ADM,MYC
GO:BP	response to endogenous stimulus	GO:0009719	FALSE	2.74137E-05	4.56203	1489	106	14	78724	TIMP2,NDST1,FGF9,RAB13,FUT8,TLR2,CYP1B1,MAPK14,HSP90AB1,NR1D2,PTPRK,ADM,CD63,MYC
GO:BP	tissue development	GO:0009888	FALSE	2.80554E-05	4.55198	2032	106	16	78724	CLEC3B,CRYGS,CEBPA,FGF9,RAB13,NRG1,EPHA4,CYP1B1,MAPK14,S1PR3,CBS,VSIG1,NR1D2,ADM,MYC,BMX
GO:BP	biological process involved in interspecies interaction between organisms	GO:0044419	FALSE	2.91538E-05	4.5353	1759	106	15	78724	IRAK3,IL7R,ABCD2,LY9,SRPK1,TLR2,MAPK14,HSP90AB1,NMT2,SLC7A5,KPNA3,RNF135,DPP4,ADM,TFEB
GO:BP	regulation of response to external stimulus	GO:0032101	FALSE	5.33993E-05	4.27246	1082	106	12	78724	IRAK3,CEBPA,KIAA0319,EPHA4,TLR2,MAPK14,NMT2,IL1R1,MPP1,NR1D2,RNF135,DPP4
GO:BP	negative regulation of multicellular organismal process	GO:0051241	FALSE	5.61408E-05	4.25072	1087	106	12	78724	IRAK3,EVL,GADD45A,ABCD2,CEBPA,TRIB2,KIAA0319,EPHA4,TLR2,IL1R2,ADM,MYC
GO:BP	positive regulation of signal transduction	GO:0009967	FALSE	5.62134E-05	4.25016	1578	106	14	78724	IL7R,NDST1,GADD45A,FGF9,RRAGD,NRG1,KIAA0319,TLR2,CYP1B1,HSP90AB1,IL1R1,CDCA8,CD63,MYC
GO:BP	regulation of immune system process	GO:0002682	FALSE	5.75439E-05	4.24	1581	106	14	78724	GPR171,IRAK3,IL7R,CEBPA,TNFSF13,TLR2,MAPK14,IL1R1,SLC7A5,MPP1,RNF135,DPP4,MYC,BMX
GO:BP	nitrogen compound transport	GO:0071705	FALSE	9.31893E-05	4.03063	1923	106	15	78724	STX17,MGST1,ASPH,FGF9,RAB13,ABAT,FAM3B,TLR2,SEC31B,SLC22A15,MAPK14,SLC7A5,KPNA3,SLC25A40,CD63
GO:BP	lipid metabolic process	GO:0006629	FALSE	9.99186E-05	4.00035	1391	106	13	78724	PLBD1,ABCD2,CEBPA,THEM4,ST3GAL6,CRAT,CYP1B1,MAPK14,NR1D2,NCEH1,MTMR3,ADM,BMX
GO:BP	negative regulation of developmental process	GO:0051093	FALSE	0.000103823	3.98371	925	106	11	78724	GPR171,GADD45A,CEBPA,FGF9,TRIB2,KIAA0319,EPHA4,TLR2,S1PR3,JDP2,MYC
GO:BP	negative regulation of RNA metabolic process	GO:0051253	FALSE	0.00010762	3.96811	1400	106	13	78724	TSHZ3,GADD45A,CDK5R1,CEBPA,FGF9,ATXN1L,NRG1,MAPK14,NR1D2,SIAH2,PTPRK,JDP2,MYC
GO:BP	establishment of localization in cell	GO:0051649	FALSE	0.000164855	3.7829	2010	106	15	78724	STX17,ASPH,ABCD2,CDK5R1,FGF9,RAB13,WIPI1,NRG1,SEC31B,MAPK14,KPNA3,MCTP1,CDCA8,INSC,CD63
GO:BP	enzyme-linked receptor protein signaling pathway	GO:0007167	FALSE	0.000167005	3.77727	970	106	11	78724	NDST1,CDK5R1,FGF9,FUT8,NRG1,KIAA0319,EPHA4,MAPK14,HSP90AB1,PTPRK,CD63
GO:BP	regulation of proteolysis	GO:0030162	FALSE	0.000167917	3.77491	406	106	8	78724	TIMP2,CLEC3B,ASPH,CEBPA,TRIB2,EPHA4,HSP90AB1,IL1R2
GO:BP	regulation of apoptotic process	GO:0042981	FALSE	0.000176923	3.75222	1462	106	13	78724	IL7R,GADD45A,CDK5R1,NRG1,EPHA4,CYP1B1,HSP90AB1,GBE1,CBS,SLC7A5,SIAH2,ADM,MYC
GO:BP	protein phosphorylation	GO:0006468	FALSE	0.000207145	3.68373	1227	106	12	78724	IRAK3,GADD45A,CDK5R1,FGF9,TRIB2,SRPK1,NRG1,EPHA4,TLR2,MAPK14,AATK,BMX
GO:BP	proteolysis	GO:0006508	FALSE	0.000213086	3.67145	1486	106	13	78724	TIMP2,CLEC3B,ASPH,RNF175,OTUD3,CEBPA,TRIB2,EPHA4,HSP90AB1,IL1R2,SIAH2,ASPRV1,DPP4
GO:BP	regulation of programmed cell death	GO:0043067	FALSE	0.000248156	3.60527	1506	106	13	78724	IL7R,GADD45A,CDK5R1,NRG1,EPHA4,CYP1B1,HSP90AB1,GBE1,CBS,SLC7A5,SIAH2,ADM,MYC
GO:BP	nucleobase-containing compound metabolic process	GO:0006139	FALSE	0.000261984	3.58173	7992	106	30	78724	HK2,IRAK3,IL7R,TSHZ3,ATF7IP2,GADD45A,ASPH,CDK5R1,CEBPA,FGF9,ATXN1L,TNFSF13,SRPK1,FUT8,NRG1,TCF4,TLR2,CYP1B1,MAPK14,HSP90AB1,ZNF532,CBS,MPP1,NR1D2,SIAH2,PTPRK,JDP2,MYC,HK3,TFEB
GO:BP	negative regulation of nucleobase-containing compound metabolic process	GO:0045934	FALSE	0.000294837	3.53042	1529	106	13	78724	TSHZ3,GADD45A,CDK5R1,CEBPA,FGF9,ATXN1L,NRG1,MAPK14,NR1D2,SIAH2,PTPRK,JDP2,MYC
GO:BP	negative regulation of cell migration	GO:0030336	FALSE	0.000296405	3.52811	292	106	7	78724	EVL,GADD45A,EPHA4,CYP1B1,DPP4,PTPRK,MCTP1
GO:BP	negative regulation of DNA-templated transcription	GO:0045892	FALSE	0.000325165	3.4879	1280	106	12	78724	TSHZ3,GADD45A,CDK5R1,CEBPA,FGF9,ATXN1L,NRG1,NR1D2,SIAH2,PTPRK,JDP2,MYC
GO:BP	regulation of cellular component organization	GO:0051128	FALSE	0.000325846	3.48699	2433	106	16	78724	IRAK3,EVL,ASPH,CDK5R1,WIPI1,NRG1,KIAA0319,EPHA4,TLR2,MAPK14,DPP4,MTMR3,MCTP1,CDCA8,CD63,MYC
GO:BP	negative regulation of RNA biosynthetic process	GO:1902679	FALSE	0.000371034	3.43059	1296	106	12	78724	TSHZ3,GADD45A,CDK5R1,CEBPA,FGF9,ATXN1L,NRG1,NR1D2,SIAH2,PTPRK,JDP2,MYC
GO:BP	negative regulation of cell motility	GO:2000146	FALSE	0.000424689	3.37193	308	106	7	78724	EVL,GADD45A,EPHA4,CYP1B1,DPP4,PTPRK,MCTP1
GO:BP	regulation of cell development	GO:0060284	FALSE	0.000459245	3.33796	847	106	10	78724	GPR171,IL7R,CEBPA,KIAA0319,EPHA4,TLR2,MAPK14,S1PR3,SLC7A5,MYC
GO:BP	negative regulation of locomotion	GO:0040013	FALSE	0.000622025	3.20619	326	106	7	78724	EVL,GADD45A,EPHA4,CYP1B1,DPP4,PTPRK,MCTP1
GO:BP	positive regulation of cell differentiation	GO:0045597	FALSE	0.000643439	3.19149	879	106	10	78724	IL7R,CEBPA,NRG1,TCF4,EPHA4,TLR2,MAPK14,HSP90AB1,SLC7A5,ADM
GO:BP	negative regulation of cell differentiation	GO:0045596	FALSE	0.000656619	3.18269	671	106	9	78724	GPR171,CEBPA,FGF9,TRIB2,KIAA0319,EPHA4,S1PR3,JDP2,MYC
GO:BP	establishment of protein localization	GO:0045184	FALSE	0.000674133	3.17125	1937	106	14	78724	HK2,STX17,ASPH,CDK5R1,FGF9,RAB13,ABAT,FAM3B,ZDHHC19,TLR2,SEC31B,MAPK14,KPNA3,CD63
GO:BP	carboxylic acid metabolic process	GO:0019752	FALSE	0.000698549	3.1558	887	106	10	78724	HK2,ABCD2,ABAT,THEM4,CRAT,TLR2,CYP1B1,MAPK14,CBS,HK3
GO:BP	positive regulation of cytokine production	GO:0001819	FALSE	0.000741035	3.13016	494	106	8	78724	IRAK3,LY9,TLR2,CYP1B1,MAPK14,IL1R1,SLC7A5,RNF135
GO:BP	regulation of response to stress	GO:0080134	FALSE	0.000759771	3.11932	1387	106	12	78724	IRAK3,CEBPA,FUT8,KIAA0319,EPHA4,TLR2,MAPK14,IL1R1,NR1D2,RNF135,MCTP1,MYC
GO:BP	oxoacid metabolic process	GO:0043436	FALSE	0.000872012	3.05948	909	106	10	78724	HK2,ABCD2,ABAT,THEM4,CRAT,TLR2,CYP1B1,MAPK14,CBS,HK3
GO:BP	organic acid metabolic process	GO:0006082	FALSE	0.000925427	3.03366	915	106	10	78724	HK2,ABCD2,ABAT,THEM4,CRAT,TLR2,CYP1B1,MAPK14,CBS,HK3
GO:BP	response to starvation	GO:0042594	FALSE	0.00108396	2.96499	219	106	6	78724	WIPI1,RRAGD,SLC7A5,MTMR3,ADM,TFEB
GO:BP	cellular response to oxygen-containing compound	GO:1901701	FALSE	0.00117278	2.93078	1182	106	11	78724	IRAK3,MGST1,CDK5R1,RAB13,RRAGD,EPHA4,TLR2,CYP1B1,MAPK14,SLC7A5,PTPRK
GO:BP	regulation of autophagy	GO:0010506	FALSE	0.00137263	2.86245	367	106	7	78724	CDK5R1,WIPI1,RRAGD,ZDHHC19,SLC7A5,MTMR3,TFEB
GO:BP	regulation of cell migration	GO:0030334	FALSE	0.00142607	2.84586	960	106	10	78724	EVL,GADD45A,FGF9,EPHA4,CYP1B1,IL1R1,MPP1,DPP4,PTPRK,MCTP1
GO:BP	small molecule catabolic process	GO:0044282	FALSE	0.00147527	2.83113	371	106	7	78724	HK2,ABCD2,ABAT,CRAT,FUT8,CBS,HK3
GO:BP	reactive oxygen species metabolic process	GO:0072593	FALSE	0.00147887	2.83007	231	106	6	78724	HK2,GADD45A,ABCD2,CYP1B1,MAPK14,CBS
GO:BP	immune response	GO:0006955	FALSE	0.0014791	2.83	2070	106	14	78724	IRAK3,IL7R,TNFSF13,LY9,SRPK1,CXCR6,TLR2,MAPK14,IL1R2,IL1R1,SLC7A5,RNF135,BMX,TFEB
GO:BP	regulation of molecular function	GO:0065009	FALSE	0.00167463	2.77608	1496	106	12	78724	IRAK3,TIMP2,GADD45A,ASPH,CDK5R1,TRIB2,FGD4,NRG1,EPHA4,TLR2,CYP1B1,MAPK14
GO:BP	carbohydrate metabolic process	GO:0005975	FALSE	0.00191659	2.71747	561	106	8	78724	HK2,NDST1,WIPI1,ST3GAL6,FUT8,MAPK14,GBE1,HK3
GO:BP	cellular response to nutrient levels	GO:0031669	FALSE	0.00223311	2.65109	248	106	6	78724	OTUD3,WIPI1,RRAGD,SLC7A5,MTMR3,TFEB
GO:BP	regulation of cell motility	GO:2000145	FALSE	0.00249613	2.60273	1022	106	10	78724	EVL,GADD45A,FGF9,EPHA4,CYP1B1,IL1R1,MPP1,DPP4,PTPRK,MCTP1
GO:BP	autophagy	GO:0006914	FALSE	0.00303851	2.51734	597	106	8	78724	STX17,CDK5R1,WIPI1,RRAGD,ZDHHC19,SLC7A5,MTMR3,TFEB
GO:BP	process utilizing autophagic mechanism	GO:0061919	FALSE	0.00303851	2.51734	597	106	8	78724	STX17,CDK5R1,WIPI1,RRAGD,ZDHHC19,SLC7A5,MTMR3,TFEB
GO:BP	regulation of reactive oxygen species metabolic process	GO:2000377	FALSE	0.00308855	2.51025	144	106	5	78724	HK2,GADD45A,ABCD2,CYP1B1,MAPK14
GO:BP	vesicle-mediated transport	GO:0016192	FALSE	0.00318367	2.49707	1592	106	12	78724	STX17,CDK5R1,RAB13,WIPI1,CD163,NRG1,TLR2,SEC31B,DPP4,ADM,MCTP1,CD63
GO:BP	central nervous system development	GO:0007417	FALSE	0.00348179	2.4582	1061	106	10	78724	NDST1,PTS,CDK5R1,FGF9,ABAT,ATXN1L,EPHA4,TLR2,AATK,CBS
GO:BP	viral process	GO:0016032	FALSE	0.00351474	2.45411	423	106	7	78724	SRPK1,FUT8,CXCR6,HSP90AB1,NMT2,KPNA3,DPP4
GO:BP	negative regulation of signal transduction	GO:0009968	FALSE	0.00355729	2.44888	1326	106	11	78724	IRAK3,OTUD3,FGF9,THEM4,NRG1,EPHA4,MAPK14,IL1R2,SIAH2,ADM,MYC
GO:BP	regulation of locomotion	GO:0040012	FALSE	0.00366017	2.4365	1067	106	10	78724	EVL,GADD45A,FGF9,EPHA4,CYP1B1,IL1R1,MPP1,DPP4,PTPRK,MCTP1
GO:BP	monocarboxylic acid metabolic process	GO:0032787	FALSE	0.00382849	2.41697	616	106	8	78724	HK2,ABCD2,ABAT,THEM4,CRAT,CYP1B1,MAPK14,HK3
GO:BP	placenta development	GO:0001890	FALSE	0.00402786	2.39493	152	106	5	78724	CEBPA,MAPK14,HSP90AB1,ADM,TFEB
GO:BP	positive regulation of immune system process	GO:0002684	FALSE	0.0047526	2.32307	1099	106	10	78724	IRAK3,IL7R,CEBPA,TNFSF13,TLR2,IL1R1,SLC7A5,RNF135,DPP4,BMX
GO:BP	tube development	GO:0035295	FALSE	0.00482942	2.3161	1101	106	10	78724	HK2,GADD45A,CEBPA,FGF9,ATXN1L,EPHA4,CYP1B1,MAPK14,ADM,MYC
GO:BP	negative regulation of apoptotic process	GO:0043066	FALSE	0.00572902	2.24192	874	106	9	78724	IL7R,NRG1,EPHA4,HSP90AB1,GBE1,CBS,SLC7A5,SIAH2,MYC
GO:BP	negative regulation of signaling	GO:0023057	FALSE	0.00753832	2.12273	1435	106	11	78724	IRAK3,OTUD3,FGF9,THEM4,NRG1,EPHA4,MAPK14,IL1R2,SIAH2,ADM,MYC
GO:BP	negative regulation of programmed cell death	GO:0043069	FALSE	0.0075858	2.12	905	106	9	78724	IL7R,NRG1,EPHA4,HSP90AB1,GBE1,CBS,SLC7A5,SIAH2,MYC
GO:BP	negative regulation of cell communication	GO:0010648	FALSE	0.00758807	2.11987	1436	106	11	78724	IRAK3,OTUD3,FGF9,THEM4,NRG1,EPHA4,MAPK14,IL1R2,SIAH2,ADM,MYC
GO:BP	negative regulation of protein metabolic process	GO:0051248	FALSE	0.00764917	2.11639	677	106	8	78724	IRAK3,TIMP2,GADD45A,TRIB2,EPHA4,HSP90AB1,IL1R2,MRPL13
GO:BP	homeostatic process	GO:0042592	FALSE	0.0076957	2.11375	1736	106	12	78724	HK2,IL7R,ASPH,CEBPA,ABAT,MAPK14,VSIG1,NR1D2,RNF135,SLC25A40,MYC,HK3
GO:BP	protein transport	GO:0015031	FALSE	0.00799655	2.0971	1444	106	11	78724	STX17,ASPH,FGF9,RAB13,ABAT,FAM3B,TLR2,SEC31B,MAPK14,KPNA3,CD63
GO:BP	viral life cycle	GO:0019058	FALSE	0.0080623	2.09354	310	106	6	78724	SRPK1,CXCR6,HSP90AB1,NMT2,KPNA3,DPP4
GO:BP	nucleic acid metabolic process	GO:0090304	FALSE	0.00835537	2.07803	7434	106	26	78724	IRAK3,IL7R,TSHZ3,ATF7IP2,GADD45A,ASPH,CDK5R1,CEBPA,FGF9,ATXN1L,TNFSF13,SRPK1,NRG1,TCF4,TLR2,CYP1B1,MAPK14,HSP90AB1,ZNF532,CBS,NR1D2,SIAH2,PTPRK,JDP2,MYC,TFEB
GO:BP	peptidyl-amino acid modification	GO:0018193	FALSE	0.00842204	2.07458	686	106	8	78724	GADD45A,ASPH,CDK5R1,NRG1,ZDHHC19,EPHA4,MAPK14,NMT2
GO:BP	cellular response to starvation	GO:0009267	FALSE	0.00847728	2.07174	177	106	5	78724	WIPI1,RRAGD,SLC7A5,MTMR3,TFEB
GO:BP	regulation of catalytic activity	GO:0050790	FALSE	0.00927791	2.03255	928	106	9	78724	IRAK3,TIMP2,GADD45A,CDK5R1,TRIB2,FGD4,NRG1,EPHA4,MAPK14
GO:BP	cellular response to radiation	GO:0071478	TRUE	0.00970774	2.01288	182	106	5	78724	GADD45A,MAPK14,NMT2,PTPRK,MYC
GO:BP	negative regulation of cellular component organization	GO:0051129	FALSE	0.00985723	2.00624	701	106	8	78724	IRAK3,EVL,KIAA0319,EPHA4,TLR2,DPP4,MCTP1,CDCA8
GO:BP	positive regulation of cardiac muscle cell proliferation	GO:0060045	FALSE	0.00988969	2.00482	25	106	3	78724	FGF9,NRG1,MAPK14
GO:CC	cellular anatomical structure	GO:0110165	TRUE	1.38E-49	48.8607	21620	106	102	78724	HK2,GPR171,IRAK3,TIMP2,CKAP4,STX17,IL7R,MGST1,NDST1,TSHZ3,CHIC1,PLBD1,ATF7IP2,CLEC3B,SPINK2,EVL,DLGAP3,PTS,GADD45A,PLXDC2,ASPH,RNF175,ABCD2,CDK5R1,OTUD3,CEBPA,FGF9,RPLP0,RAB13,ABAT,THEM4,WIPI1,ST3GAL6,ATXN1L,KIF3C,TNFSF13,RRAGD,CD163,RSPH9,TRIB2,FGD4,LY9,CRAT,SRPK1,FAM3B,FKBP9,GIMAP5,FUT8,NRG1,TCF4,ZDHHC19,KIAA0319,CXCR6,EPHA4,ANO10,TLR2,CYP1B1,SEC31B,SLC22A15,MAPK14,HSP90AB1,NDUFA4,IL1R2,NMT2,AA…
GO:CC	cellular_component	GO:0005575	FALSE	1.57E-48	47.8033	22149	106	102	78724	HK2,GPR171,IRAK3,TIMP2,CKAP4,STX17,IL7R,MGST1,NDST1,TSHZ3,CHIC1,PLBD1,ATF7IP2,CLEC3B,SPINK2,EVL,DLGAP3,PTS,GADD45A,PLXDC2,ASPH,RNF175,ABCD2,CDK5R1,OTUD3,CEBPA,FGF9,RPLP0,RAB13,ABAT,THEM4,WIPI1,ST3GAL6,ATXN1L,KIF3C,TNFSF13,RRAGD,CD163,RSPH9,TRIB2,FGD4,LY9,CRAT,SRPK1,FAM3B,FKBP9,GIMAP5,FUT8,NRG1,TCF4,ZDHHC19,KIAA0319,CXCR6,EPHA4,ANO10,TLR2,CYP1B1,SEC31B,SLC22A15,MAPK14,HSP90AB1,NDUFA4,IL1R2,NMT2,AA…
GO:CC	cytoplasm	GO:0005737	FALSE	6.63E-41	40.1785	12527	106	81	78724	HK2,IRAK3,TIMP2,CKAP4,STX17,IL7R,MGST1,NDST1,CHIC1,PLBD1,CLEC3B,SPINK2,EVL,PTS,GADD45A,ASPH,RNF175,ABCD2,CDK5R1,OTUD3,FGF9,RPLP0,RAB13,ABAT,THEM4,WIPI1,ST3GAL6,KIF3C,TNFSF13,RRAGD,CD163,RSPH9,TRIB2,FGD4,CRAT,SRPK1,FKBP9,GIMAP5,FUT8,ZDHHC19,KIAA0319,EPHA4,TLR2,CYP1B1,SEC31B,MAPK14,HSP90AB1,NDUFA4,IL1R2,NMT2,AATK,MRPL13,ATP8B4,S1PR3,GBE1,CBS,F5,SLC7A5,CCDC50,MPP1,KPNA3,S100P,NR1D2,SIAH2,RNF135,NCEH…
GO:CC	intracellular anatomical structure	GO:0005622	FALSE	9.01E-41	40.0454	17944	106	91	78724	HK2,IRAK3,TIMP2,CKAP4,STX17,IL7R,MGST1,NDST1,TSHZ3,CHIC1,PLBD1,ATF7IP2,CLEC3B,SPINK2,EVL,PTS,GADD45A,ASPH,RNF175,ABCD2,CDK5R1,OTUD3,CEBPA,FGF9,RPLP0,RAB13,ABAT,THEM4,WIPI1,ST3GAL6,ATXN1L,KIF3C,TNFSF13,RRAGD,CD163,RSPH9,TRIB2,FGD4,CRAT,SRPK1,FKBP9,GIMAP5,FUT8,NRG1,TCF4,ZDHHC19,KIAA0319,EPHA4,ANO10,TLR2,CYP1B1,SEC31B,MAPK14,HSP90AB1,NDUFA4,IL1R2,NMT2,AATK,MRPL13,ATP8B4,S1PR3,ZNF532,GBE1,CBS,F5,SLC7…
GO:CC	organelle	GO:0043226	FALSE	1.80E-35	34.7458	16936	106	85	78724	HK2,IRAK3,TIMP2,CKAP4,STX17,IL7R,MGST1,NDST1,TSHZ3,CHIC1,PLBD1,ATF7IP2,CLEC3B,SPINK2,EVL,DLGAP3,PTS,GADD45A,ASPH,RNF175,ABCD2,CDK5R1,OTUD3,CEBPA,RPLP0,RAB13,ABAT,THEM4,WIPI1,ST3GAL6,ATXN1L,KIF3C,TNFSF13,RRAGD,CD163,RSPH9,TRIB2,FGD4,CRAT,SRPK1,FAM3B,FKBP9,GIMAP5,FUT8,NRG1,TCF4,ZDHHC19,KIAA0319,EPHA4,ANO10,TLR2,CYP1B1,SEC31B,MAPK14,HSP90AB1,NDUFA4,NMT2,MRPL13,ATP8B4,ZNF532,GBE1,CBS,F5,SLC7A5,MPP1,K…
GO:CC	membrane	GO:0016020	FALSE	4.96E-35	34.3046	9953	106	70	78724	HK2,GPR171,IRAK3,CKAP4,STX17,IL7R,MGST1,NDST1,TSHZ3,CHIC1,EVL,DLGAP3,PLXDC2,ASPH,RNF175,ABCD2,CDK5R1,RPLP0,RAB13,THEM4,WIPI1,ST3GAL6,TNFSF13,RRAGD,CD163,LY9,CRAT,SRPK1,GIMAP5,FUT8,NRG1,ZDHHC19,KIAA0319,CXCR6,EPHA4,ANO10,TLR2,CYP1B1,SEC31B,SLC22A15,HSP90AB1,NDUFA4,IL1R2,NMT2,AATK,MRPL13,ATP8B4,S1PR3,IL1R1,F5,SLC7A5,IL13RA1,VSIG1,MPP1,S100P,ASPRV1,NCEH1,DPP4,TMCC2,MTMR3,PTPRK,SLC25A40,MCTP1,SRXN1,C…
GO:CC	intracellular organelle	GO:0043229	FALSE	1.17E-33	32.9325	16147	106	82	78724	HK2,IRAK3,TIMP2,CKAP4,STX17,IL7R,MGST1,NDST1,TSHZ3,CHIC1,PLBD1,ATF7IP2,CLEC3B,SPINK2,EVL,PTS,GADD45A,ASPH,RNF175,ABCD2,CDK5R1,OTUD3,CEBPA,RPLP0,RAB13,ABAT,THEM4,WIPI1,ST3GAL6,ATXN1L,KIF3C,TNFSF13,RRAGD,CD163,RSPH9,TRIB2,FGD4,CRAT,SRPK1,FKBP9,GIMAP5,FUT8,NRG1,TCF4,ZDHHC19,KIAA0319,EPHA4,ANO10,TLR2,CYP1B1,SEC31B,MAPK14,HSP90AB1,NDUFA4,NMT2,MRPL13,ATP8B4,ZNF532,CBS,F5,SLC7A5,MPP1,KPNA3,S100P,NR1D2,S…
GO:CC	membrane-bounded organelle	GO:0043227	FALSE	2.67E-33	32.5727	15780	106	81	78724	HK2,IRAK3,TIMP2,CKAP4,STX17,IL7R,MGST1,NDST1,TSHZ3,CHIC1,PLBD1,ATF7IP2,CLEC3B,SPINK2,PTS,GADD45A,ASPH,RNF175,ABCD2,CDK5R1,OTUD3,CEBPA,RPLP0,RAB13,ABAT,THEM4,WIPI1,ST3GAL6,ATXN1L,KIF3C,TNFSF13,RRAGD,CD163,RSPH9,TRIB2,FGD4,CRAT,SRPK1,FAM3B,FKBP9,GIMAP5,FUT8,NRG1,TCF4,ZDHHC19,KIAA0319,EPHA4,ANO10,TLR2,CYP1B1,SEC31B,MAPK14,HSP90AB1,NDUFA4,NMT2,MRPL13,ATP8B4,ZNF532,GBE1,CBS,F5,SLC7A5,KPNA3,S100P,NR1D2…
GO:CC	intracellular membrane-bounded organelle	GO:0043231	FALSE	3.82E-31	30.4179	14727	106	77	78724	HK2,IRAK3,TIMP2,CKAP4,STX17,IL7R,MGST1,NDST1,TSHZ3,CHIC1,PLBD1,ATF7IP2,CLEC3B,SPINK2,PTS,GADD45A,ASPH,RNF175,ABCD2,CDK5R1,OTUD3,CEBPA,RPLP0,RAB13,ABAT,THEM4,WIPI1,ST3GAL6,ATXN1L,TNFSF13,RRAGD,CD163,TRIB2,FGD4,CRAT,SRPK1,FKBP9,GIMAP5,FUT8,NRG1,TCF4,ZDHHC19,KIAA0319,EPHA4,ANO10,TLR2,CYP1B1,SEC31B,MAPK14,HSP90AB1,NDUFA4,NMT2,MRPL13,ATP8B4,ZNF532,CBS,F5,SLC7A5,KPNA3,S100P,NR1D2,SIAH2,NCEH1,DPP4,TMCC2…
GO:CC	endomembrane system	GO:0012505	FALSE	3.81E-21	20.4189	4872	106	42	78724	HK2,TIMP2,CKAP4,STX17,MGST1,NDST1,CLEC3B,SPINK2,ASPH,RNF175,RPLP0,RAB13,WIPI1,ST3GAL6,FGD4,CRAT,SRPK1,FKBP9,GIMAP5,FUT8,ZDHHC19,KIAA0319,EPHA4,TLR2,CYP1B1,SEC31B,MAPK14,HSP90AB1,NMT2,ATP8B4,F5,KPNA3,S100P,SIAH2,NCEH1,TMCC2,MCTP1,SRXN1,COL4A4,CD63,MYC,HK3
GO:CC	organelle membrane	GO:0031090	FALSE	9.10E-20	19.0408	3842	106	37	78724	HK2,CKAP4,STX17,IL7R,MGST1,NDST1,ASPH,RNF175,ABCD2,RAB13,THEM4,WIPI1,ST3GAL6,RRAGD,CD163,CRAT,GIMAP5,FUT8,ZDHHC19,KIAA0319,EPHA4,TLR2,CYP1B1,SEC31B,NDUFA4,MRPL13,ATP8B4,F5,SLC7A5,NCEH1,DPP4,TMCC2,SLC25A40,MCTP1,SRXN1,CD63,TFEB
GO:CC	cell periphery	GO:0071944	FALSE	1.21E-18	17.9174	6347	106	44	78724	GPR171,IRAK3,TIMP2,CKAP4,STX17,IL7R,MGST1,TSHZ3,CHIC1,CLEC3B,DLGAP3,ASPH,CDK5R1,RAB13,THEM4,CD163,LY9,SRPK1,NRG1,KIAA0319,CXCR6,EPHA4,ANO10,TLR2,SLC22A15,HSP90AB1,IL1R2,NMT2,ATP8B4,S1PR3,IL1R1,F5,SLC7A5,IL13RA1,VSIG1,MPP1,S100P,NCEH1,DPP4,PTPRK,COL4A4,INSC,CD63,BMX
GO:CC	plasma membrane	GO:0005886	FALSE	3.34E-17	16.4761	5866	106	41	78724	GPR171,IRAK3,CKAP4,STX17,IL7R,MGST1,TSHZ3,CHIC1,DLGAP3,ASPH,CDK5R1,RAB13,THEM4,CD163,LY9,SRPK1,NRG1,KIAA0319,CXCR6,EPHA4,ANO10,TLR2,SLC22A15,HSP90AB1,IL1R2,NMT2,ATP8B4,S1PR3,IL1R1,F5,SLC7A5,IL13RA1,VSIG1,MPP1,S100P,NCEH1,DPP4,PTPRK,INSC,CD63,BMX
GO:CC	bounding membrane of organelle	GO:0098588	FALSE	4.02E-17	16.3952	2251	106	28	78724	HK2,CKAP4,STX17,IL7R,MGST1,NDST1,ASPH,RNF175,ABCD2,RAB13,WIPI1,ST3GAL6,RRAGD,CD163,GIMAP5,FUT8,ZDHHC19,KIAA0319,EPHA4,TLR2,SEC31B,ATP8B4,F5,SLC7A5,DPP4,MCTP1,CD63,TFEB
GO:CC	vesicle	GO:0031982	FALSE	3.50E-15	14.4564	4033	106	33	78724	TIMP2,CKAP4,STX17,IL7R,MGST1,CHIC1,CLEC3B,SPINK2,RPLP0,RAB13,WIPI1,ST3GAL6,TNFSF13,CD163,FAM3B,GIMAP5,FUT8,KIAA0319,EPHA4,TLR2,SEC31B,MAPK14,HSP90AB1,ATP8B4,GBE1,F5,SLC7A5,S100P,SIAH2,DPP4,MCTP1,CD63,HK3
GO:CC	cytosol	GO:0005829	FALSE	1.08E-13	12.9678	5534	106	36	78724	HK2,STX17,IL7R,PLBD1,EVL,PTS,ABCD2,CDK5R1,OTUD3,RPLP0,RAB13,THEM4,WIPI1,KIF3C,TNFSF13,RRAGD,CD163,FGD4,CRAT,SRPK1,MAPK14,HSP90AB1,NMT2,GBE1,CBS,SLC7A5,CCDC50,KPNA3,SIAH2,RNF135,MTMR3,CDCA8,SRXN1,HK3,BMX,TFEB
GO:CC	cytoplasmic vesicle	GO:0031410	FALSE	1.17E-13	12.9328	2556	106	26	78724	TIMP2,CKAP4,STX17,IL7R,MGST1,CHIC1,CLEC3B,SPINK2,RAB13,WIPI1,CD163,GIMAP5,KIAA0319,EPHA4,TLR2,SEC31B,MAPK14,HSP90AB1,ATP8B4,F5,S100P,SIAH2,DPP4,MCTP1,CD63,HK3
GO:CC	intracellular vesicle	GO:0097708	FALSE	1.23E-13	12.9088	2562	106	26	78724	TIMP2,CKAP4,STX17,IL7R,MGST1,CHIC1,CLEC3B,SPINK2,RAB13,WIPI1,CD163,GIMAP5,KIAA0319,EPHA4,TLR2,SEC31B,MAPK14,HSP90AB1,ATP8B4,F5,S100P,SIAH2,DPP4,MCTP1,CD63,HK3
GO:CC	endoplasmic reticulum	GO:0005783	FALSE	1.45E-10	9.83827	2095	106	21	78724	HK2,CKAP4,STX17,MGST1,ASPH,RNF175,RPLP0,CRAT,SRPK1,FKBP9,GIMAP5,ZDHHC19,CYP1B1,SEC31B,F5,NCEH1,TMCC2,MCTP1,SRXN1,COL4A4,MYC
GO:CC	extracellular region	GO:0005576	FALSE	3.35E-10	9.47457	4258	106	28	78724	TIMP2,CKAP4,IL7R,PLBD1,CLEC3B,SPINK2,FGF9,RPLP0,RAB13,ST3GAL6,TNFSF13,CD163,FAM3B,FUT8,NRG1,MAPK14,HSP90AB1,IL1R2,GBE1,IL1R1,F5,SLC7A5,S100P,DPP4,ADM,COL4A4,CD63,HK3
GO:CC	secretory granule	GO:0030141	FALSE	5.40E-09	8.26762	907	106	14	78724	TIMP2,CKAP4,MGST1,CLEC3B,SPINK2,RAB13,TLR2,MAPK14,HSP90AB1,ATP8B4,F5,S100P,CD63,HK3
GO:CC	secretory vesicle	GO:0099503	FALSE	5.58E-09	8.2534	1099	106	15	78724	TIMP2,CKAP4,MGST1,CLEC3B,SPINK2,RAB13,TLR2,MAPK14,HSP90AB1,ATP8B4,F5,S100P,MCTP1,CD63,HK3
GO:CC	membrane-enclosed lumen	GO:0031974	FALSE	2.56E-08	7.59101	6695	106	32	78724	TIMP2,CKAP4,IL7R,TSHZ3,CLEC3B,GADD45A,ASPH,CDK5R1,CEBPA,ABAT,THEM4,ATXN1L,TNFSF13,RRAGD,CRAT,SRPK1,NRG1,ZDHHC19,MAPK14,HSP90AB1,MRPL13,F5,KPNA3,S100P,NR1D2,SIAH2,CDCA8,COL4A4,CD63,MYC,HK3,BMX
GO:CC	intracellular organelle lumen	GO:0070013	FALSE	2.56E-08	7.59101	6695	106	32	78724	TIMP2,CKAP4,IL7R,TSHZ3,CLEC3B,GADD45A,ASPH,CDK5R1,CEBPA,ABAT,THEM4,ATXN1L,TNFSF13,RRAGD,CRAT,SRPK1,NRG1,ZDHHC19,MAPK14,HSP90AB1,MRPL13,F5,KPNA3,S100P,NR1D2,SIAH2,CDCA8,COL4A4,CD63,MYC,HK3,BMX
GO:CC	organelle lumen	GO:0043233	FALSE	2.56E-08	7.59101	6695	106	32	78724	TIMP2,CKAP4,IL7R,TSHZ3,CLEC3B,GADD45A,ASPH,CDK5R1,CEBPA,ABAT,THEM4,ATXN1L,TNFSF13,RRAGD,CRAT,SRPK1,NRG1,ZDHHC19,MAPK14,HSP90AB1,MRPL13,F5,KPNA3,S100P,NR1D2,SIAH2,CDCA8,COL4A4,CD63,MYC,HK3,BMX
GO:CC	cytoplasmic vesicle membrane	GO:0030659	FALSE	3.37E-08	7.47186	1252	106	15	78724	CKAP4,STX17,IL7R,MGST1,RAB13,WIPI1,CD163,GIMAP5,KIAA0319,EPHA4,TLR2,SEC31B,ATP8B4,MCTP1,CD63
GO:CC	vesicle membrane	GO:0012506	FALSE	4.15E-08	7.38223	1271	106	15	78724	CKAP4,STX17,IL7R,MGST1,RAB13,WIPI1,CD163,GIMAP5,KIAA0319,EPHA4,TLR2,SEC31B,ATP8B4,MCTP1,CD63
GO:CC	organelle subcompartment	GO:0031984	FALSE	7.63E-08	7.11721	1562	106	16	78724	CKAP4,STX17,MGST1,NDST1,ASPH,RNF175,RAB13,WIPI1,FUT8,CYP1B1,SEC31B,ATP8B4,NCEH1,TMCC2,MCTP1,SRXN1
GO:CC	cell surface	GO:0009986	FALSE	7.80E-08	7.10768	914	106	13	78724	IL7R,CD163,LY9,CXCR6,EPHA4,TLR2,HSP90AB1,IL1R1,SLC7A5,IL13RA1,DPP4,PTPRK,CD63
GO:CC	vacuolar membrane	GO:0005774	FALSE	3.59E-07	6.44494	498	106	10	78724	CKAP4,STX17,MGST1,WIPI1,RRAGD,GIMAP5,SLC7A5,DPP4,CD63,TFEB
GO:CC	extracellular space	GO:0005615	FALSE	6.34E-07	6.19793	3315	106	21	78724	TIMP2,CKAP4,PLBD1,CLEC3B,FGF9,RPLP0,RAB13,ST3GAL6,TNFSF13,FAM3B,FUT8,NRG1,HSP90AB1,GBE1,F5,SLC7A5,S100P,DPP4,ADM,COL4A4,CD63
GO:CC	mitochondrion	GO:0005739	FALSE	6.03009E-06	5.21968	1844	106	15	78724	HK2,STX17,MGST1,PTS,ABAT,THEM4,CRAT,EPHA4,CYP1B1,MAPK14,HSP90AB1,NDUFA4,MRPL13,SLC25A40,HK3
GO:CC	vacuole	GO:0005773	FALSE	6.03556E-06	5.21928	867	106	11	78724	CKAP4,STX17,MGST1,PLBD1,WIPI1,RRAGD,GIMAP5,SLC7A5,DPP4,CD63,TFEB
GO:CC	cell projection	GO:0042995	FALSE	6.31848E-06	5.19939	2441	106	17	78724	TSHZ3,EVL,CDK5R1,RAB13,THEM4,ATXN1L,KIF3C,RSPH9,FGD4,EPHA4,TLR2,HSP90AB1,SLC7A5,MPP1,S100P,DPP4,BMX
GO:CC	plasma membrane bounded cell projection	GO:0120025	FALSE	1.95179E-05	4.70957	2323	106	16	78724	TSHZ3,EVL,CDK5R1,RAB13,THEM4,ATXN1L,KIF3C,RSPH9,FGD4,EPHA4,HSP90AB1,SLC7A5,MPP1,S100P,DPP4,BMX
GO:CC	intracellular membraneless organelle	GO:0043232	FALSE	3.32228E-05	4.47856	6669	106	27	78724	HK2,CKAP4,TSHZ3,CLEC3B,EVL,CDK5R1,CEBPA,RPLP0,WIPI1,ATXN1L,KIF3C,RRAGD,RSPH9,TRIB2,FGD4,SRPK1,TCF4,MAPK14,HSP90AB1,MRPL13,MPP1,NR1D2,RNF135,CDCA8,JDP2,MYC,TFEB
GO:CC	membraneless organelle	GO:0043228	FALSE	3.33231E-05	4.47725	6670	106	27	78724	HK2,CKAP4,TSHZ3,CLEC3B,EVL,CDK5R1,CEBPA,RPLP0,WIPI1,ATXN1L,KIF3C,RRAGD,RSPH9,TRIB2,FGD4,SRPK1,TCF4,MAPK14,HSP90AB1,MRPL13,MPP1,NR1D2,RNF135,CDCA8,JDP2,MYC,TFEB
GO:CC	extracellular vesicle	GO:1903561	FALSE	4.11864E-05	4.38525	2141	106	15	78724	CKAP4,CLEC3B,RPLP0,RAB13,ST3GAL6,TNFSF13,FAM3B,FUT8,HSP90AB1,GBE1,F5,SLC7A5,S100P,DPP4,CD63
GO:CC	extracellular membrane-bounded organelle	GO:0065010	FALSE	4.14312E-05	4.38267	2142	106	15	78724	CKAP4,CLEC3B,RPLP0,RAB13,ST3GAL6,TNFSF13,FAM3B,FUT8,HSP90AB1,GBE1,F5,SLC7A5,S100P,DPP4,CD63
GO:CC	extracellular organelle	GO:0043230	FALSE	4.14312E-05	4.38267	2142	106	15	78724	CKAP4,CLEC3B,RPLP0,RAB13,ST3GAL6,TNFSF13,FAM3B,FUT8,HSP90AB1,GBE1,F5,SLC7A5,S100P,DPP4,CD63
GO:CC	lysosomal membrane	GO:0005765	FALSE	4.16159E-05	4.38074	451	106	8	78724	CKAP4,MGST1,RRAGD,GIMAP5,SLC7A5,DPP4,CD63,TFEB
GO:CC	lytic vacuole membrane	GO:0098852	FALSE	4.16159E-05	4.38074	451	106	8	78724	CKAP4,MGST1,RRAGD,GIMAP5,SLC7A5,DPP4,CD63,TFEB
GO:CC	coated vesicle	GO:0030135	FALSE	5.8739E-05	4.23107	318	106	7	78724	STX17,IL7R,RAB13,WIPI1,KIAA0319,SEC31B,F5
GO:CC	secretory granule lumen	GO:0034774	FALSE	6.52257E-05	4.18558	323	106	7	78724	TIMP2,CLEC3B,MAPK14,HSP90AB1,F5,S100P,HK3
GO:CC	cytoplasmic vesicle lumen	GO:0060205	FALSE	7.2305E-05	4.14083	328	106	7	78724	TIMP2,CLEC3B,MAPK14,HSP90AB1,F5,S100P,HK3
GO:CC	vesicle lumen	GO:0031983	FALSE	7.37957E-05	4.13197	329	106	7	78724	TIMP2,CLEC3B,MAPK14,HSP90AB1,F5,S100P,HK3
GO:CC	nucleoplasm	GO:0005654	FALSE	0.000193945	3.71232	4255	106	20	78724	IL7R,TSHZ3,GADD45A,CDK5R1,CEBPA,ATXN1L,TNFSF13,RRAGD,SRPK1,NRG1,MAPK14,HSP90AB1,KPNA3,S100P,NR1D2,SIAH2,CDCA8,CD63,MYC,BMX
GO:CC	endoplasmic reticulum membrane	GO:0005789	FALSE	0.00019715	3.7052	1233	106	11	78724	CKAP4,STX17,MGST1,ASPH,RNF175,CYP1B1,SEC31B,NCEH1,TMCC2,MCTP1,SRXN1
GO:CC	endoplasmic reticulum subcompartment	GO:0098827	FALSE	0.000206627	3.68481	1239	106	11	78724	CKAP4,STX17,MGST1,ASPH,RNF175,CYP1B1,SEC31B,NCEH1,TMCC2,MCTP1,SRXN1
GO:CC	extracellular exosome	GO:0070062	FALSE	0.000207721	3.68252	2111	106	14	78724	CKAP4,CLEC3B,RPLP0,RAB13,ST3GAL6,TNFSF13,FAM3B,FUT8,HSP90AB1,GBE1,SLC7A5,S100P,DPP4,CD63
GO:CC	lytic vacuole	GO:0000323	FALSE	0.000228088	3.6419	770	106	9	78724	CKAP4,MGST1,PLBD1,RRAGD,GIMAP5,SLC7A5,DPP4,CD63,TFEB
GO:CC	lysosome	GO:0005764	FALSE	0.000228088	3.6419	770	106	9	78724	CKAP4,MGST1,PLBD1,RRAGD,GIMAP5,SLC7A5,DPP4,CD63,TFEB
GO:CC	nuclear outer membrane-endoplasmic reticulum membrane network	GO:0042175	FALSE	0.000239339	3.62099	1258	106	11	78724	CKAP4,STX17,MGST1,ASPH,RNF175,CYP1B1,SEC31B,NCEH1,TMCC2,MCTP1,SRXN1
GO:CC	external side of plasma membrane	GO:0009897	FALSE	0.000309052	3.50997	408	106	7	78724	IL7R,CD163,LY9,CXCR6,IL1R1,SLC7A5,IL13RA1
GO:CC	nucleus	GO:0005634	FALSE	0.000422656	3.37401	10078	106	32	78724	IRAK3,IL7R,TSHZ3,ATF7IP2,CLEC3B,GADD45A,CDK5R1,OTUD3,CEBPA,RPLP0,ATXN1L,TNFSF13,RRAGD,TRIB2,SRPK1,NRG1,TCF4,ZDHHC19,MAPK14,HSP90AB1,ZNF532,CBS,KPNA3,S100P,NR1D2,SIAH2,CDCA8,JDP2,CD63,MYC,BMX,TFEB
GO:CC	cell leading edge	GO:0031252	FALSE	0.000457309	3.33979	433	106	7	78724	EVL,RAB13,THEM4,FGD4,DPP4,PTPRK,BMX
GO:CC	nuclear lumen	GO:0031981	FALSE	0.000818414	3.08703	5540	106	22	78724	IL7R,TSHZ3,CLEC3B,GADD45A,CDK5R1,CEBPA,ATXN1L,TNFSF13,RRAGD,SRPK1,NRG1,ZDHHC19,MAPK14,HSP90AB1,KPNA3,S100P,NR1D2,SIAH2,CDCA8,CD63,MYC,BMX
GO:CC	endocytic vesicle	GO:0030139	FALSE	0.00182323	2.73916	351	106	6	78724	IL7R,RAB13,CD163,KIAA0319,TLR2,DPP4
GO:CC	mitochondrial membrane	GO:0031966	FALSE	0.00260531	2.58414	790	106	8	78724	HK2,MGST1,THEM4,CRAT,EPHA4,NDUFA4,MRPL13,SLC25A40
GO:CC	organelle envelope	GO:0031967	FALSE	0.00276613	2.55813	1329	106	10	78724	HK2,MGST1,THEM4,CRAT,EPHA4,NDUFA4,MRPL13,KPNA3,SLC25A40,MYC
GO:CC	protein-containing complex	GO:0032991	FALSE	0.00313409	2.50389	7956	106	26	78724	STX17,ATF7IP2,ASPH,CDK5R1,CEBPA,RPLP0,ABAT,KIF3C,RRAGD,RSPH9,TCF4,TLR2,SEC31B,HSP90AB1,NDUFA4,MRPL13,ATP8B4,SLC7A5,IL13RA1,KPNA3,RNF135,CDCA8,JDP2,COL4A4,INSC,MYC
GO:CC	Golgi apparatus	GO:0005794	FALSE	0.00324991	2.48813	1659	106	11	78724	NDST1,RNF175,RAB13,WIPI1,ST3GAL6,FGD4,FUT8,ZDHHC19,TLR2,NMT2,ATP8B4
GO:CC	actin-based cell projection	GO:0098858	FALSE	0.00349812	2.45616	232	106	5	78724	FGD4,EPHA4,SLC7A5,MPP1,S100P
GO:CC	mitochondrial envelope	GO:0005740	FALSE	0.00403671	2.39397	840	106	8	78724	HK2,MGST1,THEM4,CRAT,EPHA4,NDUFA4,MRPL13,SLC25A40
GO:CC	cell junction	GO:0030054	FALSE	0.00449805	2.34698	2401	106	13	78724	EVL,DLGAP3,CDK5R1,RPLP0,RAB13,NRG1,EPHA4,MAPK14,S1PR3,MPP1,DPP4,PTPRK,MCTP1
GO:CC	ficolin-1-rich granule lumen	GO:1904813	FALSE	0.00531425	2.27456	124	106	4	78724	TIMP2,MAPK14,HSP90AB1,HK3
KEGG	Pathways in cancer	KEGG:05200	FALSE	2.84538E-06	5.54586	527	106	9	78724	IL7R,MGST1,GADD45A,CEBPA,FGF9,HSP90AB1,IL13RA1,COL4A4,MYC
KEGG	Chemical carcinogenesis - receptor activation	KEGG:05207	FALSE	2.87576E-05	4.54125	211	106	6	78724	MGST1,FGF9,CYP1B1,HSP90AB1,KPNA3,MYC
KEGG	PI3K-Akt signaling pathway	KEGG:04151	FALSE	3.69479E-05	4.43241	356	106	7	78724	IL7R,FGF9,THEM4,TLR2,HSP90AB1,COL4A4,MYC
KEGG	Shigellosis	KEGG:05131	FALSE	7.02454E-05	4.15338	246	106	6	78724	HK2,WIPI1,RRAGD,MAPK14,IL1R1,HK3
KEGG	Metabolic pathways	KEGG:01100	FALSE	7.30553E-05	4.13635	1537	106	12	78724	HK2,MGST1,NDST1,PTS,ABAT,ST3GAL6,FUT8,NDUFA4,GBE1,CBS,MTMR3,HK3
KEGG	Fluid shear stress and atherosclerosis	KEGG:05418	FALSE	8.25767E-05	4.08314	138	106	5	78724	MGST1,MAPK14,HSP90AB1,IL1R2,IL1R1
KEGG	Central carbon metabolism in cancer	KEGG:05230	FALSE	0.000162286	3.78972	70	106	4	78724	HK2,SLC7A5,MYC,HK3
KEGG	Cytokine-cytokine receptor interaction	KEGG:04060	FALSE	0.000185052	3.73271	291	106	6	78724	IL7R,TNFSF13,CXCR6,IL1R2,IL1R1,IL13RA1
KEGG	Transcriptional misregulation in cancer	KEGG:05202	FALSE	0.000414936	3.38202	192	106	5	78724	GADD45A,CEBPA,FUT8,IL1R2,MYC
KEGG	Amoebiasis	KEGG:05146	FALSE	0.000699853	3.15499	101	106	4	78724	TLR2,IL1R2,IL1R1,COL4A4
KEGG	Starch and sucrose metabolism	KEGG:00500	FALSE	0.00100127	2.99945	36	106	3	78724	HK2,GBE1,HK3
KEGG	Neomycin, kanamycin and gentamicin biosynthesis	KEGG:00524	FALSE	0.00109351	2.96118	5	106	2	78724	HK2,HK3
KEGG	Salmonella infection	KEGG:05132	FALSE	0.00144997	2.83864	249	106	5	78724	TLR2,MAPK14,HSP90AB1,KPNA3,MYC
KEGG	MAPK signaling pathway	KEGG:04010	FALSE	0.00356629	2.44778	301	106	5	78724	GADD45A,FGF9,MAPK14,IL1R1,MYC
KEGG	Autophagy - animal	KEGG:04140	FALSE	0.00477696	2.32085	165	106	4	78724	STX17,WIPI1,RRAGD,MTMR3
KEGG	Epstein-Barr virus infection	KEGG:05169	FALSE	0.00963315	2.01623	198	106	4	78724	GADD45A,TLR2,MAPK14,MYC
REAC	Immune System	REAC:R-HSA-168256	FALSE	1.86E-13	12.7308	2085	106	24	78724	IRAK3,TIMP2,CKAP4,IL7R,MGST1,EVL,RPLP0,THEM4,KIF3C,TNFSF13,TLR2,MAPK14,HSP90AB1,IL1R2,ATP8B4,IL1R1,IL13RA1,KPNA3,S100P,SIAH2,RNF135,CD63,MYC,HK3
REAC	Disease	REAC:R-HSA-1643685	FALSE	1.74E-08	7.75857	1843	106	18	78724	CDK5R1,FGF9,RPLP0,CD163,SRPK1,FUT8,NRG1,ANO10,TLR2,CYP1B1,MAPK14,HSP90AB1,NMT2,GBE1,IL1R1,KPNA3,RNF135,MYC
REAC	Metabolism	REAC:R-HSA-1430728	FALSE	1.40E-07	6.85398	2100	106	18	78724	HK2,MGST1,NDST1,PLBD1,PTS,RPLP0,THEM4,ST3GAL6,CRAT,CYP1B1,HSP90AB1,NDUFA4,GBE1,CBS,SLC7A5,MTMR3,HK3,BMX
REAC	Neutrophil degranulation	REAC:R-HSA-6798695	FALSE	3.48E-07	6.4581	476	106	10	78724	TIMP2,CKAP4,MGST1,TLR2,MAPK14,HSP90AB1,ATP8B4,S100P,CD63,HK3
REAC	Signal Transduction	REAC:R-HSA-162582	FALSE	4.61E-07	6.33652	2558	106	19	78724	CKAP4,EVL,CDK5R1,OTUD3,FGF9,THEM4,ST3GAL6,RRAGD,FGD4,NRG1,CXCR6,MAPK14,HSP90AB1,S1PR3,PTPRK,ADM,CDCA8,COL4A4,MYC
REAC	Developmental Biology	REAC:R-HSA-1266738	FALSE	1.83403E-06	5.73659	1384	106	14	78724	EVL,CDK5R1,CEBPA,FGF9,RPLP0,SRPK1,TCF4,EPHA4,MAPK14,HSP90AB1,SIAH2,COL4A4,MYC,TFEB
REAC	Metabolism of proteins	REAC:R-HSA-392499	FALSE	5.80281E-06	5.23636	2064	106	16	78724	CKAP4,STX17,ASPH,OTUD3,RPLP0,RAB13,ST3GAL6,FKBP9,FUT8,MRPL13,F5,SIAH2,RNF135,DPP4,CDCA8,MYC
REAC	Infectious disease	REAC:R-HSA-5663205	FALSE	7.26567E-06	5.13872	1062	106	12	78724	RPLP0,CD163,SRPK1,FUT8,ANO10,TLR2,MAPK14,HSP90AB1,NMT2,IL1R1,KPNA3,RNF135
REAC	Innate Immune System	REAC:R-HSA-168249	FALSE	1.06449E-05	4.97286	1100	106	12	78724	IRAK3,TIMP2,CKAP4,MGST1,TLR2,MAPK14,HSP90AB1,ATP8B4,S100P,RNF135,CD63,HK3
REAC	Cytokine Signaling in Immune system	REAC:R-HSA-1280215	FALSE	3.60022E-05	4.44367	780	106	10	78724	IRAK3,IL7R,RPLP0,TNFSF13,MAPK14,IL1R2,IL1R1,IL13RA1,KPNA3,MYC
REAC	Signaling by Interleukins	REAC:R-HSA-449147	FALSE	9.34178E-05	4.02957	476	106	8	78724	IRAK3,IL7R,RPLP0,MAPK14,IL1R2,IL1R1,IL13RA1,MYC
REAC	Viral Infection Pathways	REAC:R-HSA-9824446	FALSE	0.000100774	3.99665	873	106	10	78724	RPLP0,SRPK1,FUT8,ANO10,TLR2,HSP90AB1,NMT2,IL1R1,KPNA3,RNF135
REAC	Signaling by Receptor Tyrosine Kinases	REAC:R-HSA-9006934	FALSE	0.000171225	3.76643	516	106	8	78724	CDK5R1,FGF9,THEM4,NRG1,MAPK14,PTPRK,COL4A4,MYC
REAC	Post-translational protein modification	REAC:R-HSA-597592	FALSE	0.000203092	3.69231	1451	106	12	78724	CKAP4,STX17,ASPH,OTUD3,RAB13,ST3GAL6,FUT8,F5,SIAH2,RNF135,CDCA8,MYC
REAC	SARS-CoV-2 Infection	REAC:R-HSA-9694516	FALSE	0.000954133	3.02039	292	106	6	78724	SRPK1,FUT8,ANO10,TLR2,HSP90AB1,RNF135
REAC	SARS-CoV Infections	REAC:R-HSA-9679506	FALSE	0.00100137	2.99941	459	106	7	78724	SRPK1,FUT8,ANO10,TLR2,HSP90AB1,IL1R1,RNF135
REAC	Axon guidance	REAC:R-HSA-422475	FALSE	0.00298251	2.52542	543	106	7	78724	EVL,CDK5R1,RPLP0,EPHA4,HSP90AB1,SIAH2,COL4A4
REAC	Nervous system development	REAC:R-HSA-9675108	FALSE	0.00398346	2.39974	568	106	7	78724	EVL,CDK5R1,RPLP0,EPHA4,HSP90AB1,SIAH2,COL4A4
REAC	Cellular responses to stress	REAC:R-HSA-2262752	FALSE	0.00410854	2.38631	796	106	8	78724	RPLP0,WIPI1,RRAGD,MAPK14,HSP90AB1,NDUFA4,SRXN1,MYC
REAC	Cellular responses to stimuli	REAC:R-HSA-8953897	FALSE	0.00465389	2.33218	810	106	8	78724	RPLP0,WIPI1,RRAGD,MAPK14,HSP90AB1,NDUFA4,SRXN1,MYC
REAC	PIP3 activates AKT signaling	REAC:R-HSA-1257604	FALSE	0.00776169	2.11004	252	106	5	78724	OTUD3,FGF9,THEM4,RRAGD,NRG1
