# Supplementary material
Source: Research Square preprint supplement (doi:10.21203/rs.3.rs-8976053/v1)
Supplement: Supplementary file 13 [file b3cd15bc339a27681ec69315.xlsx]

## Sheet: Sheet1
Name	Score	Avg_logFC	Status	GSE98793	GSE76826	GSE290797	GSE247998	GSE99725	GSE185855
ANO10	2.1687e-06	102.032	Upregulated	0.210821	351.562	0.0746008	43.621	0.319335	216.403
POMP	5.17966e-06	59.2966	Upregulated	0.0776298	17.9567	0.152559	-10.2405	0.677469	347.156
CYBA	8.98887e-06	2312.66	Upregulated	0.0665818	2912.06	0.0714963	387.355	0.505971	10575.9
MAP2K2	9.54015e-06	401.886	Upregulated	0.0489845	88.0776	0.0888976	208.539	0.339678	2114.22
NCF1	1.26545e-05	1713.04	Upregulated	0.0843433	3762.5	0.0698599	355.569	0.217987	6159.79
AGPAT2	1.63167e-05	504.029	Upregulated	0.0966316	2113.09	-0.0946341	60.7179	-0.32703	850.696
ACTR1A	2.71312e-05	284.446	Upregulated	0.0758564	23.5889	0.0726027	145.169	0.393937	1537.38
SERF2	2.97154e-05	858.295	Upregulated	-0.0220015	1090.4	-0.091416	1629.36	0.496481	2429.62
LAMTOR2	3.35677e-05	250.038	Upregulated	0.00391568	902.395	0.0995655	-17.4921	-0.20023	615.421
NDUFB1	3.45433e-05	347.796	Upregulated	0.00457738	2002.99	0.200921	-3.57331	-0.334711	87.489
RIN3	3.92917e-05	705.823	Upregulated	0.045168	419.039	0.0579784	429.623	0.206031	3385.97
MIIP	5.10491e-05	376.791	Upregulated	0.10816	1504.52	0.102963	31.588	0.294186	724.132
SEMA4D	5.55546e-05	779.763	Upregulated	0.056955	575.423	0.138997	1145.52	0.27303	2957.17
VPS37B	5.9747e-05	215.379	Upregulated	0.0549133	446.191	0.0723876	207.696	0.161819	638.095
MAFG	6.53489e-05	53.5569	Upregulated	0.206533	40.8589	0.042218	32.3359	0.427312	247.471
TWF2	7.81494e-05	215.122	Upregulated	0.0939119	259.971	-0.150016	50.238	0.332161	980.249
CTSD	8.16483e-05	986.271	Upregulated	0.159299	726.529	-0.0715077	462.083	0.603292	4728.33
CES1	9.18248e-05	21.467	Upregulated	0.326365	11.2094	0.186084	29.2354	0.5371	87.3077
AGTRAP	9.49785e-05	461.545	Upregulated	0.161434	167.654	0.0428447	203.275	0.333192	2397.8
NLRC4	0.000101057	65.7032	Upregulated	0.126482	237.571	0.227158	123.356	0.293509	32.6447
TRPC6	0.000106198	39.3478	Upregulated	0.0189961	223.17	0.0453522	-15.2029	0.511579	27.544
CTSB	0.000110578	986.583	Upregulated	0.0622407	371.926	0.0650809	2023.57	0.323174	3523.55
RAB5C	0.000119037	95.0914	Upregulated	0.0816655	28.7411	0.0360649	10.9736	0.128286	530.588
CAPNS2	0.000127115	7.0726	Upregulated	0.296614	29.3555	0.0963115	6.72501	0.11232	5.84982
CACNA1E	0.000134067	9.77609	Upregulated	0.114458	36.6412	0.116784	101.679	0.0369699	-79.9322
LAPTM5	0.000135166	3796.86	Upregulated	0.0327812	1647.88	0.0268294	2395.43	0.25658	18737.5
ARL8A	0.000137231	305.736	Upregulated	0.0920689	1277.52	0.00620956	95.3196	0.384207	461.093
ANKRD22	0.000139635	36.4423	Upregulated	0.278569	27.7854	0.14142	21.243	0.542429	168.663
HK2	0.000140766	227.945	Upregulated	0.240567	344.323	0.110816	158.036	0.112869	864.85
RANBP3	0.000149086	151.161	Upregulated	0.0602565	165.304	0.0100471	-39.8529	0.522906	780.925
TMEM60	0.000149138	43.3835	Upregulated	0.0282555	86.2183	0.0377151	8.14561	0.369053	165.502
NACC2	0.000149181	155.895	Upregulated	0.107952	532.938	-0.0115006	146.524	-0.00441746	255.819
IGFLR1	0.000173071	177.566	Upregulated	0.0615223	946.076	0.137507	5.13851	0.366751	113.614
CHST15	0.000177724	314.603	Upregulated	0.0553601	872.972	0.0434023	2760.91	0.417501	-1746.79
BRI3	0.000189395	1290.86	Upregulated	0.0946152	5841.29	-0.0299325	265.938	0.0964687	1637.75
DOK1	0.000209237	403.28	Upregulated	0.0803894	1393.19	-0.0575291	84.1735	0.20571	942.086
COPA	0.000213906	64.0105	Upregulated	0.0908143	45.6937	0.215786	-305.877	0.626724	643.313
GSK3A	0.000220406	306.089	Upregulated	0.111142	1061.2	-0.0717708	125.682	0.24787	649.364
HK3	0.000222162	675.43	Upregulated	0.145382	298.235	0.097822	124.807	0.412026	3628.88
KLHDC8B	0.000230986	108.33	Upregulated	0.145232	23.7775	0.0779049	37.4916	0.109407	588.377
ZNF672	0.000237852	117.24	Upregulated	0.0591017	88.208	-0.0656768	-41.4409	0.383876	656.299
MTF1	0.0002438	70.6372	Upregulated	0.0664903	239.717	0.195867	142.643	0.265709	40.9359
OPA3	0.000247616	39.3119	Upregulated	0.0635904	36.5734	0.0571457	-44.2506	0.433286	242.995
NSFL1C	0.000259266	306.659	Upregulated	0.0303347	85.5241	0.0645887	129.008	0.0705687	1625.25
RNASE2	0.000264368	179.524	Upregulated	0.212391	423.291	0.402789	-35.6428	0.292018	688.588
B4GALT5	0.000273569	229.638	Upregulated	0.14498	758.437	-0.00620748	820.365	0.801928	-201.916
SHISA5	0.000285652	1990.97	Upregulated	0.0407891	3904.75	0.0301512	412.877	0.110513	7628.02
EMILIN2	0.000289669	440.769	Upregulated	0.11893	1801.78	0.162647	-241.605	0.447532	1083.71
CD300C	0.000310772	93.1174	Upregulated	0.115667	94.6314	0.120451	-29.2796	0.241136	492.875
NDUFS2	0.000313266	196.879	Upregulated	-0.0259133	130.562	0.0857439	-41.1365	0.395122	1091.39
CCND3	0.000318854	970.207	Upregulated	0.0892065	37.2673	-0.0119598	446.531	0.751887	5336.62
LRRC61	0.000325206	23.5141	Upregulated	0.0883654	5.04876	0.040692	32.1979	0.664854	103.044
SYNGR1	0.000330402	44.4968	Upregulated	0.0547259	56.4947	0.040017	25.7626	-0.30522	184.934
CEBPA	0.00033161	139.879	Upregulated	0.194266	581.526	-0.178821	14.8422	0.253832	242.639
LMTK2	0.000332822	40.6183	Upregulated	0.0628183	58.7906	0.156584	307.621	0.28017	-123.201
PTEN	0.0003346	352.413	Upregulated	0.0721721	460.421	0.0881164	1653.4	-0.101491	0.604396
SLC16A3	0.000349315	2278.34	Upregulated	0.129282	10632.5	-0.0276024	1105.28	0.00942098	1932.16
DENND1A	0.000361675	86.6612	Upregulated	0.0870326	31.3028	0.0697681	15.0984	0.375943	473.033
AP1B1	0.000364275	316.634	Upregulated	0.103189	603.019	0.0754698	-171.087	0.442748	1467.25
RNF208	0.000379736	4.53438	Upregulated	0.0535168	-6.55445	0.0415234	5.89498	0.219411	27.5513
ASPRV1	0.000384494	265.801	Upregulated	0.165161	1101.63	0.00140818	89.933	-0.177598	403.251
MIER2	0.000386063	42.9148	Upregulated	0.0347241	73.8212	0.086662	-26.6154	0.502429	209.659
DYNLT1	0.000395278	361.16	Upregulated	0.0410191	1184.62	0.0787281	51.3278	0.049123	930.837
SBF2	0.000403402	50.4428	Upregulated	0.128134	51.4492	0.14623	364.93	0.0285707	-114.026
RAB32	0.000404604	98.1807	Upregulated	0.0824706	111.552	-0.0574218	63.5018	0.249615	413.756
ANKS1A	0.000416954	45.229	Upregulated	0.131951	81.2146	0.113669	29.2461	0.467839	160.2
CKAP4	0.000429511	291.156	Upregulated	0.13859	836.119	-0.0393062	349.577	0.100582	561.042
TMEM63B	0.000432674	132.294	Upregulated	0.0848203	11.6953	0.0501474	449.896	0.0323732	332.004
F11R	0.000436135	255.284	Upregulated	0.0969669	899.364	0.0921468	171.447	0.0855789	460.617
RNASEL	0.000437234	83.7407	Upregulated	0.0512946	372.085	0.194807	137.142	0.135819	-7.16484
SELPLG	0.000437234	1899.62	Upregulated	0.0667448	796.992	-0.0853989	1034.09	0.193557	9566.46
ANAPC11	0.000465729	689.866	Upregulated	0.0332149	3655.57	0.0460186	5.47641	-0.205755	478.277
S100A12	0.000467132	2570.89	Upregulated	0.314511	13555.3	0.342827	170.513	-0.149006	1698.96
CAPG	0.000473515	533.078	Upregulated	0.129653	319.239	0.073453	5.24911	0.346714	2873.43
ASCL2	0.000480241	135.782	Upregulated	0.0748188	633.739	0.00771668	18.6976	0.592339	161.579
MARK2	0.000481533	253.951	Upregulated	0.0765837	30.5887	0.0365512	402.894	0.100637	1090.01
ELF4	0.000503659	456.536	Upregulated	0.0682215	1786.95	0.0960923	206.645	0.392384	745.064
TFEB	0.000531655	477.893	Upregulated	0.14222	1198.2	-0.090718	224.724	-0.178678	1444.56
NEK4	0.000532681	3.9227	Upregulated	0.0739369	30.8828	0.110403	-40.2572	0.290351	32.4359
ARAP1	0.000534153	1002.7	Upregulated	0.0697778	296.73	0.0610382	1701.29	0.143236	4017.88
ZDHHC12	0.000537838	141.533	Upregulated	0.110371	234.157	-0.0450345	41.0056	0.0955243	573.875
PCDH1	0.000537926	14.6334	Upregulated	0.0224176	22.6145	0.0272539	36.5322	0.107774	28.4963
CYB5R3	0.000543006	527.225	Upregulated	0.100148	1638.03	-0.00968294	237.687	0.212142	1287.34
LOXL3	0.000549593	31.1594	Upregulated	0.106285	69.1929	0.0466787	-4.55758	0.399092	121.769
TMEM11	0.000550364	113.52	Upregulated	0.0647703	417.031	0.0004461	33.0411	0.178366	230.802
MPST	0.000566646	115.764	Upregulated	0.0755695	344.771	0.0542344	28.7296	-0.0351739	320.991
TBC1D10B	0.000568122	211.535	Upregulated	0.0942893	136.851	0.0184586	98.828	0.168834	1033.25
SH3BP5L	0.000569311	244.864	Upregulated	0.0691074	383.383	0.0248762	187.227	0.33148	898.148
UBE2S	0.000571595	58.2542	Upregulated	0.0353186	79.9209	0.000444751	15.6763	0.293231	253.599
TRIM8	0.000573289	301.765	Upregulated	0.0386857	514.214	0.03464	435.332	0.0464623	860.927
RRAGD	0.000577151	44.8208	Upregulated	0.169157	120.344	-0.0402365	146.019	0.379949	2.05311
TST	0.000589237	270.646	Upregulated	0.141322	1181.13	-0.0587217	61.2019	-0.244399	381.7
CASP1	0.000599718	704.367	Upregulated	0.0547454	1654.07	0.0621538	153.46	0.0443671	2418.51
ZFYVE1	0.000609309	59.8314	Upregulated	0.0464204	35.9382	0.0725712	30.1644	0.228156	292.538
UPF1	0.000636674	544.565	Upregulated	0.0778882	1298.94	0.0539056	323.272	0.41067	1644.64
LILRA5	0.000670492	52.6411	Upregulated	0.12889	230.429	0.047623	62.4876	0.0446349	22.7088
TYROBP	0.000677248	6385.87	Upregulated	0.0841154	25610.3	0.0913681	906.342	-0.186987	11798.6
KLHL8	0.000691562	50.5871	Upregulated	0.137114	179.398	0.0804074	105.806	0.218032	17.8828
GAB1	0.000692774	28.3308	Upregulated	0.0569149	6.16248	0.0896389	178.204	-0.426134	-14.1026
WDR13	0.000721113	117.62	Upregulated	0.0695934	32.1386	0.0166104	39.8473	0.0246611	633.621
SIPA1	0.000725472	688.421	Upregulated	0.0763496	233.973	0.0453428	461.071	0.050554	3435.31
DYSF	0.000729899	840.407	Upregulated	0.14668	307.635	0.129115	2377.26	0.31825	2356.95
EXOC3	0.000732785	198.125	Upregulated	0.0314345	95.8057	0.0918047	73.9442	0.0246039	1018.85
DGCR2	0.00073466	508.325	Upregulated	0.086385	1143.65	0.00289461	528.719	0.100452	1377.39
ARPC2	0.000738679	1707.71	Upregulated	0.0137081	5306.58	0.0309022	698.509	0.018329	4241.09
LILRA6	0.000741264	182.399	Upregulated	0.12125	962.688	-0.0369834	56.1898	0.16915	75.2637
IFITM1	0.000750087	1964.25	Upregulated	0.0541213	6614.75	0.0651401	129.565	0.100101	5040.97
PSENEN	0.000763159	108.28	Upregulated	0.111314	314.338	0.0651241	27.1456	0.0291238	307.993
MFSD9	0.000766759	47.2311	Upregulated	0.0825531	61.2097	-0.0313387	37.6068	0.44558	184.073
NFAM1	0.000773066	2115.51	Upregulated	0.0932588	3972.11	0.0945869	2114.68	-0.148815	6606.24
TNFRSF1B	0.000802992	1699.91	Upregulated	0.0446596	104.365	0.0914656	1195.23	0.0152096	8899.68
KLHL2	0.000809153	41.2892	Upregulated	0.196283	289.939	0.068898	232.619	0.118931	-275.207
TCN2	0.000825623	34.2733	Upregulated	0.135398	15.7153	0.0368165	-28.6317	0.479225	217.905
AATK	0.00083469	330.798	Upregulated	0.152381	914.497	0.00635657	850.855	-0.394151	219.672
CLCN4	0.00083983	19.3681	Upregulated	0.0665495	36.1669	0.0596339	96.4805	0.227971	-16.793
FLOT2	0.000858972	1150.26	Upregulated	0.092807	418.614	0.0301308	1186.75	0.127839	5295.92
SH2D3C	0.000887123	615.02	Upregulated	0.0651136	2371.77	0.0827479	328.758	0.456572	988.984
OR1J4	0.000891323	1.0268	Upregulated	0.0293243	3.5814	0.00779559	1.67428	0.0585044	0.809524
B3GALT4	0.000892802	147.346	Upregulated	0.035595	883.902	-0.0123659	-0.0385591	0.0423406	0.144689
DOCK8-AS2	0.000892802	1.64028	Upregulated				1.64028
MRFAP1P1	0.000892802	6.48399	Upregulated				-0.0466768		13.0147
RETN	0.000892802	71.315	Upregulated	0.251624	252.727	0.0106634	10.5074	0.0398266	164.353
MAST3	0.000900585	404.797	Upregulated	0.0429663	203.78	0.0764262	752.611	0.0108494	1472.26
HS1BP3	0.000906618	108.673	Upregulated	0.034219	43.3399	0.0133518	65.2917	0.416482	542.945
OS9	0.000912862	508.877	Upregulated	0.0498166	636.365	0.110933	122.669	0.272236	2293.8
MGST2	0.000914621	115.246	Upregulated	0.107681	500.288	0.0634868	-4.04617	0.131327	194.934
TICAM1	0.000974197	72.6761	Upregulated	0.000756849	208.21	0.0632438	-34.0086	0.516522	261.275
JDP2	0.000974407	300.651	Upregulated	0.140785	1199.67	-0.0805021	136.852	-0.0671561	467.394
HTRA3	0.000982286	3.65695	Upregulated	0.0494265	1.28427	0.0377847	5.56164		11.3516
CTNNB1	0.000991994	77.6971	Upregulated	0.0637257	111.528	0.0677149	-63.3496	0.559492	417.313
NRG1	0.00101021	40.1775	Upregulated	0.172113	119.752	0.0435493	24.7986	-0.541837	96.8407
RNF111	0.00102155	1.20454	Upregulated	0.140399	135.172	0.125947	82.7002	0.218726	-211.13
AGPAT3	0.00102391	115.222	Upregulated	0.0453401	101.51	0.100716	-267.604	0.353105	856.929
MGST1	0.00102969	92.0207	Upregulated	0.178836	289.731	-0.00387463	-13.2471	0.0459572	275.419
MVP	0.00103368	1730.32	Upregulated	0.0282714	6051.42	0.0577066	353.192	0.511325	3976.7
RXRA	0.00103869	1141.2	Upregulated	0.112881	2694.49	-0.0528685	1324.47	-0.0134056	2828.18
FKBP4	0.00104234	96.8904	Upregulated	-0.0442087	-12.0511	0.0664907	-35.0178	0.898251	627.491
SERTAD1	0.00107506	190.119	Upregulated	0.0605127	812.383	-0.00784686	6.61593	0.424769	321.236
WWP2	0.00108225	192.994	Upregulated	0.0820566	50.9712	0.0913425	296.063	0.209645	810.546
TIMM17B	0.00110363	205.233	Upregulated	0.0606065	583.085	-0.052938	10.4855	-0.182849	638.004
EXTL3	0.00111422	429.694	Upregulated	0.0729876	1246.81	-0.0437335	486.882	0.306163	844.132
QSOX1	0.00111861	171.296	Upregulated	0.0922065	303.601	0.0454749	45.8427	0.282476	677.91
ATP6V0E1	0.0011425	732.95	Upregulated	0.00644454	1230.1	0.0278083	100.977	0.216827	3066.37
TESC	0.00114644	465.252	Upregulated	0.117254	881.35	-0.146829	723.964	-0.124372	1186.35
TOM1	0.00115612	480.907	Upregulated	0.102276	1567.66	0.0008604	105.676	0.222132	1211.78
MED16	0.00116365	169.871	Upregulated	0.0426604	-59.9867	0.00372828	232.862	0.741605	845.562
SLC35A2	0.0011726	26.893	Upregulated	0.0830419	17.6234	0.0150658	1.02638	0.362613	142.247
BLVRB	0.00118489	721.281	Upregulated	0.15383	1983.39	0.160753	1441.97	-0.155913	902.17
RPH3AL	0.00120567	10.9389	Upregulated	0.0488045	40.057	-0.0171346	3.50076	0.259941	21.7839
DEAF1	0.00120916	23.8049	Upregulated	0.0622403	-22.1532	0.0593832	-23.3364	0.565433	187.632
FCN1	0.00122049	5339.27	Upregulated	0.117488	11243.8	0.0447041	-535.912	0.415945	21327.2
LRRC3	0.00122709	7.13179	Upregulated	0.0453905	3.5268	0.0263771	-1.2278	0.229511	40.1905
S1PR4	0.00122762	3350.99	Upregulated	0.0473104	14331.1	-0.139367	622.17	-0.302505	5153.07
TMEM187	0.00123402	22.1055	Upregulated	0.0212612	11.5167	0.0901777	0.743278	0.00686055	120.255
OAZ2	0.00123762	524.345	Upregulated	0.0911764	1048.8	0.0945946	655.845	-0.6045	1441.85
SPATA2L	0.00125763	67.7641	Upregulated	0.110679	172.073	0.0114879	21.0817	0.144718	213.163
RIPK3	0.00126533	52.1667	Upregulated	0.0339824	16.2568	0.0328167	16.9193	0.153181	279.604
TP53I3	0.00126852	37.9323	Upregulated	0.121672	134.48	0.0332454	0.28209	0.602079	92.0751
TSPAN17	0.00126966	62.1338	Upregulated	0.0307972	4.50191	0.06077	13.2146	0.196295	354.799
SAMD8	0.00127901	31.4524	Upregulated	0.106167	12.7676	0.0519612	202.901	0.180959	-27.293
AKIRIN2	0.00128222	74.8245	Upregulated	0.0945674	109.656	-0.0238257	202.188	0.279638	136.753
DIAPH1	0.00128288	518.03	Upregulated	-0.0255935	1638.32	0.196536	-277.656	0.472195	1746.87
UBTD1	0.00128288	89.5605	Upregulated	0.144087	365.343	-0.102285	50.76	-0.0421344	121.26
ADORA3	0.00129962	50.1345	Upregulated	0.259534	21.4023	0.030836		-0.0455829	229.026
RAB7A	0.00129998	773.574	Upregulated	0.047982	3418.45	0.0224098	422.113	0.249623	800.564
BCL6	0.00130264	956.528	Upregulated	0.0512152	3259.41	0.0644004	3437.45	0.225599	-958.031
CDC42EP4	0.00130621	23.3146	Upregulated	0.0518175	7.25959	-0.047169	32.3623	0.268168	99.9927
STAR	0.00131099	1.07243	Upregulated	0.0787728	3.35628	0.0374772	0.356672		1.53297
RFC2	0.00131578	37.0161	Upregulated	0.111161	21.9834	0.0317141	12.966	-0.014113	187.018
ARRB1	0.00132433	178.613	Upregulated	0.023711	68.2056	0.0438563	145.317	0.203934	857.885
ARRDC1	0.00133237	301.631	Upregulated	0.0354416	90.7255	0.0263104	80.7534	0.253506	1637.99
RNASEK	0.00133606	2047.33	Upregulated	0.0879978	10131.7		2.59716	-0.078968	102.355
PGD	0.00134531	934.233	Upregulated	0.0920678	1634.07	0.0191005	408.493	0.105538	3562.62
RNF181	0.00135048	261.3	Upregulated	0.00329145	800.018	0.0144681	-10.9822	-0.0731352	778.819
CD63	0.00139752	1325.8	Upregulated	0.139698	5402.43	-0.0361473	64.9401	0.162363	2487.17
GNA15	0.00140196	72.6695	Upregulated	0.173977	10.2684	0.089167	-10.3612	0.271758	435.575
WIPI1	0.00141979	163.872	Upregulated	0.160653	777.709	-0.0585589	64.689	0.286477	140.447
GPR84	0.00144749	9.71218	Upregulated	0.228576	28.0534	0.00638768	3.19381	0.419151	26.3718
TSHZ3	0.00145134	29.337	Upregulated	0.251433	124.401	0.196901	46.7199	0.340744	4.11172
HSPA1L	0.00145962	8.42267	Upregulated	0.098373	49.7766	0.0406999	0.263825	0.318059	0.0384615
KIAA0319L	0.00147468	465.907	Upregulated	0.115149	-11.9226	0.104134	147.042	0.392416	2659.71
JMJD6	0.00148706	63.0695	Upregulated	0.0296391	45.3278	-0.0585621	39.0208	0.326267	293.771
MSRA	0.00152037	96.2226	Upregulated	0.104495	378.398	0.0469952	8.58042	0.624994	189.581
GTPBP1	0.00152981	237.107	Upregulated	0.0567058	-24.6166	0.0704379	189.735	0.280096	1257.12
FBXO6	0.00154327	97.3275	Upregulated	0.16834	39.7128	0.0293972	13.0375	0.31338	530.703
STX10	0.00155459	368.233	Upregulated	0.0695152	432.692	-0.10857	135.609	-0.254212	1641.39
PDXK	0.00157506	304.79	Upregulated	0.0631284	76.6344	-0.0104044	7.62506	0.297471	1744.13
VPS26B	0.00158564	116.768	Upregulated	0.0317727	34.5006	0.0856088	35.1086	0.342553	630.538
ARHGAP26	0.00159572	150.287	Upregulated	0.0630724	271.391	0.149585	1161.61	-0.0315838	-531.46
NLRP3	0.0016006	102.691	Upregulated	0.102655	214.465	0.145785	34.7357	0.00103753	366.698
FLII	0.00160248	74.8479	Upregulated	0.0634278	216.677	0.037299	101.387	0.394144	130.529
PSTPIP2	0.00160342	127.721	Upregulated	0.15413	12.7852	0.126321	85.2024	0.50772	667.549
APOL2	0.00160694	438.993	Upregulated	0.033933	748.748	0.111761	138.146	0.150715	1746.77
LCP1	0.00161115	3926.37	Upregulated	0.0219105	8127.52	0.0507514	3494.73	0.264347	11935.6
CEACAM3	0.00163947	303.427	Upregulated	0.100499	66.9853	0.0187625	211.398	0.0441467	1542.01
IL17RA	0.00164234	939.996	Upregulated	0.115154	1724.24	0.0872695	1365.37	0.172979	2549.99
RP2	0.00166244	151.7	Upregulated	0.0759601	1065.76	0.0539684	21.624	0.175247	-177.493
SLCO4C1	0.00166677	39.0604	Upregulated	0.217087	221.209	0.0893384	76.6007	0.237481	-63.9908
CD53	0.00168517	341.078	Upregulated	-0.0232162	1500.33	0.0619886	793.18	0.377773	-247.462
SASH3	0.00168991	477.288	Upregulated	0.0186582	339.784	0.0896446	121.182	0.220958	2402.43
LRRC70	0.00169148	6.44624	Upregulated	0.183898	37.3222	0.079437	4.37646	0.301555	-3.58608
RAD23A	0.00169976	181.632	Upregulated	0.144559	252.702	0.0206725	329.341	0.131721	507.452
FBXW11	0.00170522	20.3238	Upregulated	-0.0227263	202.139	0.121332	-54.1837	0.469442	-26.5806
DPCD	0.00170668	12.6652	Upregulated	0.0187215	37.2634	0.0197421	11.7423	0.00925809	26.9377
MAPK1	0.00170931	76.1355	Upregulated	0.0729558	729.988	0.0369406	960.047	0.247028	-1233.58
TMEM120A	0.00172392	206.603	Upregulated	0.0787174	319.493	-0.242513	50.7783	-0.128054	869.641
HCLS1	0.0017366	3325.71	Upregulated	0.0492833	12886.9	0.0168501	450.365	0.0930904	6616.86
SLC36A1	0.00175587	96.9261	Upregulated	0.0624318	293.595	0.0620241	340.045	-0.379834	-51.8278
INPP5D	0.00175781	457.076	Upregulated	0.00832105	2528.23	0.0923291	212.704	0.506768	0.919414
APMAP	0.00177244	787.471	Upregulated	0.118301			880.597		1481.7
BEND7	0.00178549	11.3682	Upregulated	0.0467175	27.0275	-0.0332962	64.0791	0.125557	-23.0366
CRACR2B	0.00178549	69.6017	Upregulated	0.106521			3.9239		204.775
RNPEPL1	0.00178549	1858.88	Upregulated	0.0427197	6374.38	-0.0319359	211.798	0.0573883	4567.02
RELT	0.00182273	412.928	Upregulated	0.102362	1809.48	0.0286645	260.698	0.0213327	407.242
NDFIP1	0.00183954	167.615	Upregulated	0.0236973	88.7729	0.034538	146.02	0.304745	770.537
DNAJC5	0.00184589	356.822	Upregulated	0.0838046	208.956	-0.0259228	225.791	0.111082	1706.02
HSD3B7	0.00187166	7.97635	Upregulated	0.225273	4.78845	-0.0293559	-8.6205	-0.119344	51.6136
ATP6V0A1	0.00187353	313.41	Upregulated	0.0955827	1160.61	0.155313	44.3501	0.151409	675.101
GRN	0.00187765	6337.66	Upregulated	0.168466	27210.8	-0.019725	191.243	0.351118	10623.4
HRH2	0.00188103	348.098	Upregulated	0.0878523	14.06	0.123002	438.815	0.0399372	1635.46
S100P	0.00188243	5151.62	Upregulated	0.394581	29140.5	0.00201872	200.946	-0.317484	1568.14
RCOR1	0.00188538	159.741	Upregulated	0.0750921	612.739	0.10826	193.68	0.0939363	151.749
REPS2	0.00189182	140.146	Upregulated	0.204855	157.049	-0.0266282	690.47	0.0238748	-6.84432
TAP1	0.00190778	397.577	Upregulated	0.0570716	2258.12	0.127512	126.685	0.314758	0.155678
MSRB2	0.00191348	120.754	Upregulated	0.112664	576.246	0.00987939	27.9604	0.213202	119.98
CD101	0.00192877	58.2522	Upregulated	0.1637	13.1454	0.0767388	-26.5074	0.169508	362.465
DBN1	0.00193201	96.7801	Upregulated	0.0522982	156.144	-0.000547031	23.967	0.265473	400.253
MANSC1	0.00194503	76.3159	Upregulated	0.102227	189.138	-0.0911317	267.956	0.188551	0.600733
GLA	0.0019475	134.215	Upregulated	0.0908877	617.855	0.0703397	3.6555	0.0232165	183.593
MAP4K4	0.0019483	164.036	Upregulated	0.0315584	50.5392	0.123965	442.377	0.327103	490.817
HOMER3	0.00195295	308.292	Upregulated	0.107384	1759.65	-0.0222083	-8.30188	0.0365062	98.2821
RAB24	0.00196221	333.823	Upregulated	0.0121161	1613.32	0.0731415	52.4891	-0.0236563	337.066
GPD2	0.00196982	62.8043	Upregulated	0.116731	43.0945	0.00378022	3.98782	0.46177	329.161
SCLT1	0.00197567	55.941	Upregulated	0.126513	98.011	0.0952069	241.47	-0.190533	-3.8663
PDK3	0.00197978	46.023	Upregulated	0.0832381	53.935	0.0453817	90.1162	0.0350416	131.923
SRPK1	0.00198093	409.182	Upregulated	0.155801	1443.78	0.035989	658.518	0.0232444	352.579
IFI30	0.0020045	2145.14	Upregulated	0.071162	12840.4	0.124573	-6.99137	0.204781	36.9579
GFRA3	0.00200457	3.42639	Upregulated	0.0710516	19.83	0.0270649	0.307458	0.0901665	0.232601
EFNA4	0.00200683	14.2456	Upregulated	0.0270982	4.80674	0.0308742	6.99594	0.169784	73.4432
RAC1	0.00201287	351.073	Upregulated	0.0727399	234.899	-0.0554769	207.59	0.322081	1663.61
LINC00173	0.00201372	48.6588	Upregulated	0.16867	79.869	-0.0198656	46.2598	-0.419824	166.095
ASGR2	0.00202013	172.582	Upregulated	0.232918	302.253	0.099165	4.07763	-0.0100941	728.839
MAP1S	0.00202632	88.3992	Upregulated	0.089917	-65.4104	0.062549	55.7098	0.461559	539.482
FAR2	0.00202744	27.4202	Upregulated	0.0864301	111.615	0.154548	107.181	0.0651858	-54.5806
PILRA	0.00203075	577.134	Upregulated	0.0930013	642.348	0.0108066	599.105	0.134424	2221.11
GNB1L	0.00203304	21.6462	Upregulated	0.0139785	31.3339	0.00531158	3.64637	0.359168	94.5183
ZNF467	0.00205343	445.646	Upregulated	0.179172	631.904	-0.118117	459.306	0.138861	1582.46
RAB13	0.00205855	8.97533	Upregulated	0.241247	11.195	-0.0209247	3.17707	0.283383	38.9762
NQO2	0.00207396	231.445	Upregulated	0.117497	263.239	-0.0695141	101.182	0.171659	1024.03
SCAND1	0.00208274	113.427	Upregulated	0.0894335	54.72	-0.02943	8.17199	0.22327	617.386
RPIA	0.00209924	63.8031	Upregulated	0.132435	118.103	0.0424227	110.412	0.0749759	154.053
PHRF1	0.00209932	167.413	Upregulated	-0.0912995	1145.37	0.120706	-145.986	0.527993	4.53663
CSGALNACT2	0.00210678	15.9153	Upregulated	0.06722	82.4894	0.0801724	133.196	0.149251	-120.491
GPR17	0.00212065	0.586806	Upregulated	0.0969872	-0.835633	-0.0672592	4.77473		-1.0348
DCAF11	0.00212764	195.287	Upregulated	0.0745121	22.9764	0.0172401	132.969	0.0387816	1015.65
SLC1A5	0.00213121	166.269	Upregulated	0.125195	8.74827	0.139826	704.257	0.025937	284.319
ITPKC	0.00214529	42.9016	Upregulated	0.0952891	23.2847	0.0416928	-3.68645	0.141724	237.533
CD68	0.00215395	36.8335	Upregulated	0.14797	216.237	0.0688202	2.38305	0.245298	1.91941
SLIRP	0.00215835	117.241	Upregulated	-0.0468894	671.895	0.0859173	-12.7448	-0.324541	44.5824
SMPDL3A	0.00215835	20.6663	Upregulated	0.0966438	96.2503	0.155823	6.1309	0.252504	21.1117
APOL1	0.00218054	254.513	Upregulated	0.017658	93.572	0.130403	62.7367	0.261053	1370.36
B3GNT8	0.00219384	274.109	Upregulated	0.12032	1142.49	-0.0626136	249.698	-0.35729	252.762
SMG5	0.00219638	300.225	Upregulated	0.0150181	49.0395	0.260354	48.5703	0.389942	1703.08
LAMB3	0.0022025	3.27999	Upregulated	0.00663132	6.54984	0.0285566	1.15322	0.839118	11.1026
TFIP11	0.00220495	177.904	Upregulated	0.012329	640.045	0.0484562	34.4886	0.423917	392.408
DNASE2	0.0022234	64.7142	Upregulated	0.125578	44.1233	0.0610832	16.0183	0.283048	327.674
SLC34A3	0.00222971	0.621295	Upregulated	0.0653192	2.04219	0.0861155	0.45307	-0.103909	1.18498
CTSS	0.00223082	2376.55	Upregulated	0.041141	274.181	0.036593	2745.38	0.123972	11239.6
WDR97	0.00223573	26.8012	Upregulated	0.0895622			14.4404		65.8736
LRFN1	0.00224767	70.5518	Upregulated	0.168201	60.2589	0.0431258	89.3222	-0.0201487	273.538
ZNF341	0.0022607	36.0429	Upregulated	0.0368213	105.55	0.0158344	5.0898	0.471906	105.093
CDKN2C	0.00228449	7.30844	Upregulated	0.0384394	14.7172	0.0455981	-1.43582	0.24162	30.2436
IL13RA1	0.00229646	354.35	Upregulated	0.15412	1570.57	0.0162587	603.923	-0.316846	-48.2473
SRSF4	0.00231489	147.207	Upregulated	0.049035	554.554	0.13712	-88.4784	0.453984	416.527
PLAGL1	0.00232106	25.9793	Upregulated	0.162682	-0.541981	0.174134	129.612	0.0402834	26.4286
KLF5	0.00232862	9.63217	Upregulated	0.0930576	13.4814	-0.0342566	26.0523	0.405712	17.7949
BTBD9	0.00233342	15.4842	Upregulated	0.0474324	66.5373	-0.00232243	-83	0.511337	108.811
DIP2B	0.00233683	65.3846	Upregulated	0.0613554	50.7019	0.157808	257.571	0.315417	83.5
FBXO27	0.00233961	1.21051	Upregulated	0.119546	0.982836	-0.0398974	1.05784		3.93223
TNFRSF12A	0.00234082	40.4317	Upregulated	0.0545455	159.447	-0.0805397	16.0969	-0.757749	67.8297
FOSL2	0.00235006	273.862	Upregulated	0.0687657	227.441	0.049963	1177.9	0.092347	237.623
SLC9A1	0.00236141	65.9421	Upregulated	0.0590363	2.98286	0.0401368	93.8716	0.169857	298.529
F12	0.00236451	35.4969	Upregulated	0.0739164	154.621	-0.0536283	1.2623	-0.299457	57.3773
ATP11A	0.00236907	24.768	Upregulated	0.0966435	211.83	0.151988	282.428	0.238184	-346.137
CAMP	0.00238498	281.248	Upregulated	0.287052	1205.15	0.0520722	81.7174	-0.159681	400.44
MAP2K6	0.0023888	35.2795	Upregulated	0.146941	77.0052	0.0109236	21.3288	0.270944	112.914
RBP7	0.00239321	212.211	Upregulated	0.14543	1000.57	-0.0669425	25.1248	-0.385541	247.875
LHFPL2	0.00242749	43.2592	Upregulated	0.204187	89.4079	0.0701427	-37.4186	0.45102	206.841
SLC66A2	0.00243052	340.484	Upregulated	0.108499			175.276		846.068
DRAM1	0.00243069	49.0216	Upregulated	0.151744	207.902	0.0953517	36.8843	0.0744264
UNC13D	0.00244304	727.741	Upregulated	0.0458994	78.2662	0.00626801	578.35	0.011944	3709.77
ATG9A	0.00244825	174.292	Upregulated	0.099342	11.2205	-0.0468511	190.177	0.302337	844
UQCR10	0.00245345	238.697	Upregulated	0.0203319	874.517	-0.0104586	-14.0218	0.130869	571.546
VDR	0.00247223	89.6159	Upregulated	0.1176	308.31	0.0618393	149.287	-0.278818	80.1978
DUSP23	0.00247649	181.064	Upregulated	-0.0154894	802.578	0.0312796	-0.217149	-0.0755007	284.082
FBRS	0.00247649	553.988	Upregulated	0.0372617	1425.39	0.131223	412.573	-0.0220026	1485.82
PLIN3	0.00248202	121.779	Upregulated	0.148627	37.2419	0.00701357	108.671	0.033805	584.571
MANBA	0.00250451	95.841	Upregulated	0.0991073	217.904	0.16104	42.7286	0.199248	313.954
SMARCD3	0.002511	288.979	Upregulated	0.112285	1287.92	0.0380382	-9.8554	-0.415471	456.073
HEBP1	0.00251194	177.412	Upregulated	0.061712	731.656	0.0104409	95.4404	0.100855	237.203
PRKCD	0.00251549	345.972	Upregulated	0.10833	492.624	0.0624919	251.265	0.0937589	1331.68
TRAPPC3	0.00253388	109.672	Upregulated	0.0100375	63.8591	0.0147499	10.8179	0.0930528	583.238
CETN2	0.00255045	27.4916	Upregulated	0.0335446	22.9765	0.0258165	1.54033	0.282077	140.092
MAP3K6	0.00255976	23.0749	Upregulated	0.0349014	14.3813	0.0246727	-10.4541	0.337998	134.125
ISG20	0.00256179	1505.38	Upregulated	-0.00984375	6190.89	0.0585879	192.969	0.146015	2648.22
RALGAPA2	0.00256179	69.2911	Upregulated	0.0657448	2.33593	0.102892	504.161	0.139867	-91.0586
SLC15A3	0.00256857	328.914	Upregulated	0.159679	611.011	-0.038959	141.248	-0.107695	1221.21
NUP214	0.00257194	330.671	Upregulated	0.032296	180.129	0.0900671	127.14	-0.0182098	1676.65
ARMC7	0.00258417	67.6459	Upregulated	0.0909148	82.2674	-0.121673	21.0249	0.146771	302.467
NDUFB4	0.00258497	346.768	Upregulated	0.0270095	1554.66	0.0728099	-14.308	0.219716	539.938
PGLYRP1	0.00259326	173.672	Upregulated	0.291024	337.942	-0.14606	184.856	0.120433	518.967
TMSB10	0.00260965	2814.46	Upregulated	-0.00498058	942.826	0.201542	-610.776	0.437445	16554.1
UBE2E3	0.00262327	39.9185	Upregulated	0.0674744	7.94505	0.00877233	15.3607	0.180071	215.949
ITPK1	0.00262611	163.106	Upregulated	0.0686722	23.0099	0.0502552	826.915	0.00746339	128.584
TMED1	0.00263353	19.7909	Upregulated	0.0377628	24.1051	-0.0123542	13.481	0.379236	80.7546
SECTM1	0.00263768	1486.34	Upregulated	0.123976	3558.25	-0.0243749	704.81	0.19149	4654.71
SHKBP1	0.00263976	867.084	Upregulated	0.164539	197.415	-0.0470451	567.977	0.136576	4436.86
BMP2	0.00264308	1.93093	Upregulated	0.0900054	6.05121	-0.0566708	6.32471		-2.75458
SEMA4A	0.00265432	332.485	Upregulated	0.166312	8.29695	0.126384	323.832	0.304826	1662.18
TEX261	0.00267314	108.436	Upregulated	0.0382708	-39.4913	0.0641114	1.33486	0.538221	688.132
APOA1	0.00267807	1.09411	Upregulated	0.0335286	-1.58731	0.0158523	0.26687	0.789951	7.04579
CLSTN1	0.00267807	49.7422	Upregulated	-0.0589084	-178.943	0.0507375	-286.698	0.816446	763.286
FAM110B	0.00267807	0.362552	Upregulated	0.159433	1.99761	-0.123926	0.48757	-0.707922
MAST4-AS1	0.00267807	2.39735	Upregulated		8.14087	-0.0445371	2.56266		-1.0696
MGST3	0.00267807	79.1131	Upregulated	-0.0283199	85.3156	0.153223	-55.9878	0.314015	444.912
TOR1A	0.00267807	113.923	Upregulated	0.0216451	292.91	0.00279763	20.0335	0.213924	370.357
CSF1R	0.00267821	997.633	Upregulated	-0.0309234	3381.53	0.107585	-201.732	0.223531	2805.7
TBC1D2	0.00268153	290.942	Upregulated	0.13717	1346.72	0.0465379	12.001	0.325496	386.423
TIMP2	0.00268158	891.28	Upregulated	0.151824	4726.11	0.0158854	536.916	0.181482	84.304
ARHGAP1	0.00270218	448.134	Upregulated	0.0038443	1856.13	0.0799912	43.4536	0.368961	788.766
TADA2B	0.00270869	56.4745	Upregulated	0.06475	24.4187	-0.0489487	132.021	0.301676	182.09
TLR7	0.00271209	35.7004	Upregulated	0.0779831	134.878	0.159872	-104.733	0.510309	183.31
HPCAL1	0.00273235	236.948	Upregulated	0.03691	263.497	-0.0342997	234.852	0.196193	923.139
SELL	0.00273258	3168.87	Upregulated	0.0412126	6351.77	-0.0229479	3210.18	0.34489	9450.91
PFKFB4	0.00273448	329.678	Upregulated	0.142119	365.189	0.0529899	294.413	-0.158635	1318.43
UQCRQ	0.00273688	540.412	Upregulated	-0.054971	3017.41	-0.0345543	-6.30695	-0.181394	231.643
WAS	0.0027688	797.563	Upregulated	0.0883123	-186.65	0.0370402	347.199	0.119422	4624.58
AKR1A1	0.0027856	160.679	Upregulated	-0.0564624	10.7793	0.103676	-61.8011	0.242591	1014.81
DEPDC4	0.00282967	3.09944	Upregulated	0.0398323	12.1425	0.0509722	0.96347		2.30037
ACKR1	0.00283475	35.4826	Upregulated	0.0182533			57.4094		49.0201
FRMD8	0.00284505	97.1946	Upregulated	0.0483055	229.832	0.104091	75.9168	0.104737	277.161
C2CD2L	0.00285387	165.069	Upregulated	0.0763105	320.383	0.032183	65.346	-0.106735	604.685
LAMP1	0.00285948	1109.17	Upregulated	0.0429378	4993.34	0.0326184	-46.0015	0.498064	1707.12
NCOA6	0.00285948	4.26296	Upregulated	0.0906664	107.793	0.0113678	-6.10299	0.514415	-76.7289
CR1L	0.00287379	14.0296	Upregulated	0.137828	22.1711	0.0705117	69.4926	0.146141	-7.84066
S100A8	0.00288268	5628.81	Upregulated	0.066194	25675.6	0.183161	898.259	-0.42454	7199.13
CEACAM1	0.00288713	119.621	Upregulated	0.0764953	177.553	0.180075	177.258	0.128094	362.527
AMMECR1L	0.00290412	26.1262	Upregulated	0.0841723	66.5338	0.0819549	-1.05226	0.333246	90.7766
YWHAG	0.0029077	117.409	Upregulated	0.0504767	627.496	0.100608	-114.343	0.197937	190.951
LTB4R	0.00290947	215.6	Upregulated	0.207334	95.2733	-0.126053	340.763	0.183825	857.297
TBC1D14	0.00292295	55.8439	Upregulated	0.106324	355.475	0.0792648	441.5	0.098279	-462.196
ZNF319	0.00295457	18.3734	Upregulated	0.139776	17.8159	0.0327158	72.7768	0.674952	18.8004
GBA2	0.00296652	143.434	Upregulated	0.0508395	6.58419	0.0862635	116.411	0.341652	737.128
VAV1	0.00297437	505.269	Upregulated	0.0073086	1104.95	0.00672753	278.811	0.164504	1647.68
FAM117A	0.00297752	211.965	Upregulated	0.070895	336.764	0.00306423	424.509	0.102425	510.339
HPSE	0.00297752	101.673	Upregulated	0.185251	36.2126	0.183299	224.728	0.0245913	348.707
TLR8	0.00301479	204.439	Upregulated	0.123206	470.395	-0.0319685	1079.75	0.135399	-323.74
GRK6	0.00301862	563.329	Upregulated	0.062441	126.673	-0.0532995	344.766	0.336626	2908.19
PTPRE	0.00302033	187.763	Upregulated	0.0737408	488.739	0.117181	561.991	-0.0528186	75.7106
SYK	0.00302324	219.001	Upregulated	0.0524364	923.009	0.10593	314.133	0.244484	76.4597
RAB3GAP2	0.00302944	10.0611	Upregulated	-0.00380618	134.675	0.189238	-67.0842	0.478869	-7.88828
KIAA0319	0.00303556	4.31274	Upregulated	0.184281	17.584	-0.0104611	66.5474	-0.198	-58.2308
UBA52	0.00304588	2272.27	Upregulated	0.00662494	1264.87	0.0303858	1684.87	0.297649	10683.5
CLIP1	0.00305105	33.0339	Upregulated	0.0437798	230.869	0.0879421	138.651	0.204893	-171.654
STXBP2	0.00305151	468.127	Upregulated	0.0646837	-50.0173	-0.0212321	51.0964	0.573027	2807.07
RFX1	0.00305713	64.7916	Upregulated	0.0505956	120.921	0.0366136	17.5089	0.192421	250.04
OPRD1	0.00306519	0.840012	Upregulated	0.0258374	0.696288	0.0671933	0.0136986	0.14731	4.08974
AURKAIP1	0.00307673	249.38	Upregulated	0.0312359	296.853	-0.102488	44.4378	0.185725	1154.88
TKT	0.00309081	4375.88	Upregulated	0.112668	11154.7	-0.067236	920.479	0.0916613	14180
HERPUD1	0.00309434	521.298	Upregulated	0.0127202	2360.64	0.0283743	66.1451	0.0840055	700.879
MSRB3	0.00310216	4.8147	Upregulated	0.110164	22.7585	-0.110503	20.3582	0.506344	-14.7344
RNF144B	0.0031126	153.027	Upregulated	0.148109	186.369	-0.0569637	432.185	-0.0206414	299.538
RHOG	0.00312045	1059.27	Upregulated	0.111491	127.893	0.0186018	482.387	0.0382394	5745.18
GRB10	0.00313193	43.8546	Upregulated	0.324022	101.987	0.00183249	14.4881	0.0927388	146.234
GM2A	0.00313809	234.357	Upregulated	0.103535	395.79	0.0451617	-27.9614	0.180291	1037.99
ERG	0.0031385	3.4831	Upregulated	0.105428	-0.0621278	0.0243187	16.4541		0.893773
LIPA	0.00313851	229.161	Upregulated	0.0485088	560.345	0.0705455	103.488	0.191983	710.822
C15orf39	0.00316269	778.574	Upregulated	0.127654	659.075	-0.0981852	1955.75	0.203571	2056.38
MAPKAPK2	0.00316651	129.97	Upregulated	0.0378507	162.898	-0.0592817	87.9026	0.565736	528.474
ARID3B	0.0031699	171.045	Upregulated	0.0379477	573.288	0.0202571	110.711	0.248787	341.965
REEP4	0.00319328	109.55	Upregulated	0.123979	104.292	0.00288054	-9.10604	0.363243	561.626
ITSN1	0.00320283	6.08201	Upregulated	0.0600654	3.32398	0.0552878	-53.0173	0.13409	85.9359
HP	0.00321681	71.6877	Upregulated	0.225203	210.048	0.0753116	2.48148	-0.264204	217.56
CEACAM4	0.00323182	56.1352	Upregulated	0.197773	251.202	-0.0692163	87.7996	-0.462893	-1.85531
CCRL2	0.00324733	16.1851	Upregulated	0.0839261	23.8185	-0.031339	4.6139	0.224641	68.4011
BANP	0.00324901	187.816	Upregulated	0.0789635	594.013	0.144411	133.712	-0.0330929	398.98
LILRB1	0.00327598	46.1642	Upregulated	0.0875869	231.772	0.147282	-13.1826	0.113534	58.0476
DRC12	0.00327796	30.0692	Upregulated	0.111379			9.87265		80.2234
CDIPT	0.00327851	206.375	Upregulated	0.134737	93.2675	-0.0330656	203.278	0.0913314	941.509
PARP10	0.00328953	813.263	Upregulated	0.0584533	278.059	0.067533	9.29731	0.0610823	4592.04
LYPLA2	0.00330991	270.239	Upregulated	0.0545362	315.333	-0.037576	8.24962	0.237013	1297.6
FCER1G	0.00332045	791.252	Upregulated	0.0664377	1138.51	0.0384544	57.8108	0.336049	3550.75
GBP6	0.0033227	10.0748	Upregulated	0.00978893	39.2536	0.192435	14.4957	-0.368813	6.8663
ANKRD13D	0.00334014	937.983	Upregulated	0.0288342	1518.94	-0.00853474	455.22	-0.362251	3654.08
HDAC5	0.00335344	292.541	Upregulated	0.0526922	42.7681	-0.0172724	270.636	-0.150244	1441.96
ATF5	0.00335857	53.3612	Upregulated	0.00522074	7.66601	0.0485072	6.08524	0.407734	305.954
MAFB	0.00336141	359.22	Upregulated	0.0692459	1874.06	0.0706092	-112.579	0.473615	393.222
ORAI3	0.00340082	36.667	Upregulated	0.0714324	14.8564	-0.0473599	37.9792	0.149463	166.993
UBASH3B	0.00341351	17.1594	Upregulated	0.0253772	18.3501	0.073485	62.5906	0.620034	21.2967
POLR2A	0.00341605	53.3394	Upregulated	0.0374913	397.088	0.193812	-123.728	0.342011	46.1026
PPP1R3D	0.00342155	84.2282	Upregulated	0.0831898	437.744	-0.0860333	146.963	0.270987	-79.6062
GRB2	0.00342527	557.435	Upregulated	0.0401332	267.503	0.0478822	253.316	0.228673	2823.48
AP2S1	0.00345949	566.535	Upregulated	0.0594875	2127.71	-0.0261903	70.0868	0.581247	1200.79
VPS37C	0.00346206	142.815	Upregulated	0.0564715	412.762	0.0340235	89.0238	-0.094575	355.11
ECSIT	0.00348783	70.2073	Upregulated	0.0500137	-55.4842	0.0457402	69.9944	0.108431	406.529
DNAJB12	0.00350077	126.963	Upregulated	0.0823823	76.7623	-0.00905434	62.7783	0.129499	622.033
AGFG1	0.00350699	37.7611	Upregulated	0.107508	28.4853	0.00183217	89.9036	0.452661	107.615
KLF16	0.00351529	128.904	Upregulated	0.0590448	294.539	-0.0663484	64.3602	-0.157986	414.687
SESN2	0.00353198	36.8388	Upregulated	0.0752969	25.0815	-0.0367186	25.7707	0.147567	169.995
SLC7A7	0.00355564	583.783	Upregulated	0.0822157	721.206	0.0181795	-68.4521	0.447913	2849.4
TMEM127	0.00355564	487.311	Upregulated	0.0875877	1171.28	0.0262349	570.358	0.198968	1181.92
RBCK1	0.0035565	497.934	Upregulated	0.0058755	32.2007	0.0280778	138.843	0.253124	2816.27
DDX23	0.00357054	144.161	Upregulated	0.00517819	35.844	0.0211733	-53.5388	0.822638	881.81
DHRS4	0.00357054	59.1804	Upregulated	0.0294725	45.6764	-0.188021	-6.7727	0.00234345	316.335
NACC1	0.00357054	109.733	Upregulated	0.0353393	240.967	-0.0945131	43.1852	0.27942	374.024
TDRD9	0.00357054	25.6105	Upregulated	0.491694	90.3558	0.0910354	6.74277	0.119315	55.8626
ANKRD2	0.00357394	0.861108	Upregulated	0.0467658	2.42633	-0.0515879	0.48757	0.28321	1.97436
NFIL3	0.00357743	576.515	Upregulated	0.169207	3022.22	-0.0380484	263.334	0.225883	173.176
CARS2	0.00358582	1053.88	Upregulated	0.00178688	4909.25	0.0343736	95.0797	0.178728	1318.73
CD163	0.00360036	289.686	Upregulated	0.21653	1099.81	0.150936	-166.331	0.208884	804.057
IST1	0.00361628	138.326	Upregulated	0.0523659	18.9563	0.0761403	132.051	0.461606	678.361
CD151	0.00362942	349.715	Upregulated	0.120946	1344.17	0.0448292	-43.965	0.0575018	797.861
PRKD2	0.00363575	509.668	Upregulated	0.0502501	56.0533	0.051322	201.344	0.27511	2800.23
ASCC1	0.00364027	22.3619	Upregulated	0.0386682	11.2613	0.0879571	-10.9427	0.218544	133.507
HMG20B	0.0036432	114.343	Upregulated	0.0511035	97.4662	0.0141932	8.84221	0.0789256	579.604
ASPH	0.00364459	25.032	Upregulated	0.178101	63.9696	0.105805	144.294	-0.0446699	-58.3114
FLI1	0.0036483	144.276	Upregulated	0.0458698	936.737	0.0716215	312.119	0.312872	-383.628
RASGEF1A	0.00365065	19.8326	Upregulated	0.0639461	21.9016	0.00599442	3.48858	0.255067	93.2802
SMNDC1	0.00365728	62.8489	Upregulated	0.0725825	274.062	-0.0375659	80.8062	0.192303	21.9982
MPND	0.00366152	31.231	Upregulated	0.12044	39.8815	0.0253212	-4.64637	0.314658	151.69
PCGF3	0.00366171	94.9306	Upregulated	0.0364232	47.6838	0.0424432	119.23	0.202712	402.388
TM9SF2	0.00367784	123.431	Upregulated	0.0717981	196.116	0.0319908	362.4	0.496861	181.469
ZC3H3	0.00367784	95.7499	Upregulated	0.0352329	114.548	-0.00537938	44.7555	0.283778	414.883
BACH1	0.00368703	37.9303	Upregulated	0.0528111	698.256	0.0814119	1591.28	-0.101022	-2061.99
TNFSF18	0.0037066	0.661872	Upregulated	0.0669657	-0.0944324	0.00921437	1.08219		2.24542
VSIG10L	0.00372784	3.41382	Upregulated	0.150177	2.5173	0.0322036	0.579909	0.337009	16.8663
MCTP1	0.00373477	47.1683	Upregulated	0.1913	131.407	0.0621905	184.083	0.0912371	-32.8242
FERMT3	0.00374023	605.69	Upregulated	0.120845	-18.6309	0.0335433	303.822	0.227849	3348.57
CFP	0.00378845	2235.21	Upregulated	0.110839	7033.71	-0.0291004	555.311	0.0740898	5822.08
PTDSS2	0.00379515	11.7281	Upregulated	0.0357483	58.8665	0.0340945	-31.3435	0.155094	42.6209
CHIC2	0.00379694	57.8024	Upregulated	0.023978	110.87	-0.0669489	88.7164	0.457597	146.813
RAB10	0.00382562	163.279	Upregulated	0.0547607	658.871	0.0256292	176.689	0.117038	143.916
IL10RB	0.00383954	15.967	Upregulated	0.0344517	232.368	0.0373202	153.18	0.209602	-290.027
EPN1	0.00386468	557.017	Upregulated	0.0214067	1503.34	-0.0681071	168.219	0.100782	1670.49
NDUFA1	0.00387743	521.001	Upregulated	0.00760093	2739.15	0.0666018	-7.06748	0.0183891	393.83
TOLLIP	0.00387743	252.62	Upregulated	0.104945	590.626	-0.0113051	195.474	-0.298264	729.822
ATG3	0.0038804	163.933	Upregulated	0.0935924	465.221	0.0520942	126.562	0.0547797	391.615
OLFML3	0.00388255	1.09161	Upregulated	0.0978862	-2.26356	0.0226707	3.65601		3.94505
PYCARD	0.00388255	816.752	Upregulated	0.107018	3494.66	0.0183438	190.175	-0.056357	1215.61
FGR	0.00389135	2710.08	Upregulated	0.0986291	11760.6	-0.00941784	1319.77	0.186438	3179.86
TSPO	0.00389579	2896.99	Upregulated	0.130237	12955.2	-0.115848	94.6728	0.286732	4331.76
SORT1	0.00390798	108.576	Upregulated	0.148973	70.7773	0.195042	102.522	0.299221	477.511
PCSK5	0.00391588	33.3869	Upregulated	0.0343868	99.1396	0.0508657	36.7215	0.457484	63.9176
ATXN1L	0.00391714	9.85468	Upregulated	0.138025	36.2453	0.0170862	-17.2887	0.360676	39.6557
PLEKHM2	0.0039267	174.867	Upregulated	0.0990061	3.23483	0.0299981	87.4698	0.329744	958.038
PXN	0.00392694	930.774	Upregulated	0.0873902	2297.67	0.112616	1367.75	-0.0959009	1919.12
NUMBL	0.00392954	11.735	Upregulated	-0.00067194	4.9592	0.0430621	11.3876	0.253595	53.7674
ORM2	0.00393522	38.6323	Upregulated	0.295887	131.042	-0.0424994	1.48402	-0.380691	99.3956
SLC2A1	0.00393969	174.146	Upregulated	0.138393	15.1697	0.0864547	152.304	0.0975206	877.082
ALAS1	0.00398966	68.1174	Upregulated	0.170903	80.3757	0.00278205	54.1826	0.647943	273.324
CREBBP	0.00399524	133.615	Upregulated	0.0766712	268.344	0.121232	588.983	0.333742	-56.1667
MOSPD2	0.0039957	72.5454	Upregulated	0.110983	457.432	-0.0550336	419.131	-0.413436	-440.934
JAK2	0.00399882	69.1478	Upregulated	0.0940357	296.568	0.0660458	3.17352	0.353339	114.632
SRPK2	0.00400676	2.64011	Upregulated	0.0692237	149.341	0.0815468	219.18	0.106579	-352.938
SNX27	0.00405599	67.1951	Upregulated	0.0555156	128.383	0.165779	207.144	0.227797
SNAP29	0.00406052	40.2568	Upregulated	0.0194633	7.16757	0.0356087	10.9158	0.591314	222.811
HMGCR	0.00406764	49.9106	Upregulated	0.099217	321.508	0.0456175	99.9406	0.324693	-122.454
OSBPL5	0.00407072	101.286	Upregulated	0.0588919	202.329	0.0572159	19.8397	0.308762	385.123
CCM2	0.0040764	581.816	Upregulated	-0.0414145	220.05	0.0598986	182.549	0.159149	3088.12
OSCAR	0.00408083	120.234	Upregulated	0.272859	567.305	-0.0259421	5.74683	0.318775	147.784
SERPINA1	0.00410765	959.94	Upregulated	0.0641264	374.432	0.013164	3023.41	0.116296	2361.6
CCL23	0.00410844	10.2373	Upregulated	0.168215	34.3624	0.0378388		-0.112433	16.7308
UBALD2	0.00411096	767.536	Upregulated	0.0821397			527.093		1775.43
TBXAS1	0.00411767	395.345	Upregulated	0.15649	158.285	0.0722436	761.493	-0.177747	1452.24
C3AR1	0.0041322	135.204	Upregulated	0.211448	129.416	0.0814245	-13.4054	0.187001	694.736
RNF138	0.00413242	72.1072	Upregulated	0.0959484	156.498	0.020684	58.3125	0.309561	217.407
MTMR3	0.00415011	189.425	Upregulated	0.14368	65.3528	0.139984	943.56	-0.0554807	127.407
TMEM43	0.00417369	20.1667	Upregulated	0.0537742	117.706	0.0740235	130.36	0.167195	-127.361
GNB4	0.00420117	150.398	Upregulated	0.0301996	533.202	0.10048	48.3374	0.122183	320.597
TECPR2	0.00421084	133.268	Upregulated	0.159921	221.621	0.152508	521.239	0.00694686	56.4304
HADHB	0.00422009	141.253	Upregulated	0.0762151	251.991	0.0830951	17.5337	0.296688	577.535
GHITM	0.00422641	204.146	Upregulated	0.0222243	365.927	0.0788462	58.2902	0.132605	800.425
TLR5	0.00423354	20.4772	Upregulated	0.143057	50.9133	0.0548261	91.8884	0.147576	-20.2839
CCDC77	0.00423908	11.0342	Upregulated	0.00107035	21.6745	0.0423238	2.78945	0.564094	41.1337
SVIL	0.00425326	68.4124	Upregulated	0.0801308	62.0593	0.20277	387.816	-0.140129	-39.544
AKAP5	0.00426451	6.18197	Upregulated	0.00710001	8.12723	0.0235772	6.81228	0.106953	22.0147
MAN1A1	0.00430076	13.8941	Upregulated	0.13715	356.967	0.107843	468.147	-0.0944088	-741.899
CUEDC1	0.0043103	87.2118	Upregulated	0.0753259	21.2936	-0.0129399	100.38	-0.25295	401.788
UPP1	0.00432465	26.0546	Upregulated	0.052035	129.021	0.1031	0.572806	0.524335
EFHD1	0.00433294	2.05472	Upregulated	0.0649107	0.633167	0.0080449	1.28564	0.772437	9.5641
RNASE3	0.00434384	51.5676	Upregulated	0.385984	154.523	-0.242498	-2.26738	0.339661	156.667
GNAI2	0.00436142	6295.22	Upregulated	0.0677423	25394.1	0.0316682	188.825	-0.109937	12188.4
BTK	0.00439541	201.204	Upregulated	0.053447	276.737	0.118191	-71.4587	0.121993	1001.65
ATP6AP1	0.00440782	568.01	Upregulated	0.175522	1516.27	-0.0294956	27.2065	0.157913	1864.28
IL1B	0.00440782	398.681	Upregulated	0.0519175	2543.62	0.0686007	201.883	0.110312	-353.645
CHMP4B	0.00440883	137.76	Upregulated	0.0127679	181.381	0.00972431	29.6717	0.650924	614.833
PGM1	0.00442026	94.1212	Upregulated	0.124096	296.651	-0.0428527	28.7996	0.115084	239.081
ACAP2	0.00442337	65.5613	Upregulated	0.0712578	93.4835	0.09221	487.496	0.108043	-187.883
GBE1	0.00444136	34.1032	Upregulated	0.143916	147.453	-0.0306845	53.8757	0.267541	2.91026
FBXO45	0.0044629	13.3532	Upregulated	-0.119084		0.151094	-2.85743		56.2381
GPANK1	0.0044629	155.432	Upregulated	-0.0607502	933.286	-0.104074	-0.610857	0.270776	-0.190476
MMP8	0.0044629	49.1445	Upregulated	0.631777	0.978005	0.306014	126.993		116.813
PRSS57	0.0044629	46.2365	Upregulated		213.95	-0.0616863	7.99899	-0.778334	10.0733
TRBV6-2	0.0044629	3.87363	Upregulated						3.87363
DEGS1	0.00452362	154.52	Upregulated	0.073586	315.679	0.0288435	13.9422	0.264394	597.13
MEF2A	0.00452657	51.3263	Upregulated	0.116404	405.613	0.122485	-23.3146	0.223933	-74.804
CTNNBIP1	0.00456477	43.6225	Upregulated	0.0751134	136.78	0.060604	-4.7037	-0.114787	129.637
NIT1	0.00457168	46.3036	Upregulated	0.0707914	-6.00954	0.0435915	21.3876	0.862286	261.467
SERPINB8	0.00459393	24.1955	Upregulated	0.0636147	38.779	0.0688348	-47.3937	0.471962	153.183
CHMP2A	0.0045973	1006.66	Upregulated	0.0696005	4179.46	-0.0189071	54.7088	0.121259	1805.65
FGD3	0.00460694	1436.4	Upregulated	-0.0107604	1972.55	0.0423755	840.398	0.141163	5805.3
SYP	0.00461282	5.73825	Upregulated	0.151424	0.656968	-0.011116	1.00203		26.8919
CTBS	0.00462247	187.137	Upregulated	0.16447	768.39	-0.0363003	513.455	-0.562593	-158.588
ATP6V1E1	0.00463213	206.794	Upregulated	0.00312546	106.639	0.0163887	7.53526	0.698164	1125.87
GNS	0.00463213	576.157	Upregulated	0.0758394	2586.37	0.0989058	4.69964	0.328949	865.37
MAP3K3	0.00469115	822.007	Upregulated	0.0507033	3617.87	0.062695	606.236	0.0947704	707.725
MLLT1	0.00469115	184.471	Upregulated	0.0971526	290.036	-0.0931239	35.3054	0.228599	781.253
PANX1	0.00469588	15.0753	Upregulated	0.0322213	30.2066	0.0241152	5.21258	0.280572	54.696
PCMT1	0.0046999	95.8401	Upregulated	0.0659986	181.771	-0.0147124	1.53425	0.418929	391.266
SPI1	0.00471402	1823.87	Upregulated	0.0946248	2414.02	-0.054591	1699.23	0.077803	6829.83
LGALS1	0.00472028	560.763	Upregulated	0.123674	838.868	0.0995744	-91.8858	0.218948	2617.16
PTPN23	0.00472028	72.6854	Upregulated	0.0800147	-106.971	0.0498936	-62.5302	0.534576	604.949
CCDC13	0.00476004	5.7359	Upregulated	0.0271371	18.0817	0.0350171	10.0061	0.109741	6.15568
MLXIP	0.00480829	120.821	Upregulated	0.0366699	-94.9912	0.155254	22.9645	0.293894	796.469
BIN2	0.00481215	601.452	Upregulated	0.030223	179.302	0.0198545	540.239	0.371018	2888.75
CLK3	0.00481638	269.286	Upregulated	0.0328496	482.924	-0.00141936	181.649	0.318393	950.793
GNB2	0.00486318	947.745	Upregulated	0.0654991	637.745	-0.085736	812.546	0.0814319	4236.12
BATF	0.00486653	182.596	Upregulated	0.0820474	942.354	0.0414761	-8.6068	0.111816	161.592
ERGIC1	0.00488443	670.511	Upregulated	0.108488	1227.86	0.0191293	1279.04	-0.375457	1516.41
GALNS	0.00488671	84.1204	Upregulated	0.042174	34.6611	-0.0833719	102.131	0.162163	367.81
NEURL3	0.00489258	1.07393	Upregulated	0.0590742	3.97255	0.021368	0.912735	0.197629	1.28022
SLC22A15	0.00491672	47.7576	Upregulated	0.228665	119.943	0.0259402	272.384	-0.142536	-105.894
CLTA	0.00491805	211.086	Upregulated	-0.00843981	485.456	0.0269467	-19.9102	0.343641	800.606
PDGFRB	0.00493322	19.9119	Upregulated	0.0264961	64.0493	0.0440514	11.4247	0.384514	43.5421
SIPA1L1	0.00493404	207.572	Upregulated	0.0526404	499.748	0.18763	665.351	0.0742297	80.0165
CISD1	0.00494911	11.1919	Upregulated	-0.0621869	-10.2188	0.0980518	5.80822	0.887081	70.6392
LCN2	0.00498874	151.802	Upregulated	0.720555	-141.086	0.0448611	210.319	-0.148383	840.962
MRFAP1	0.00499348	219.254	Upregulated	0.0307075	532.2	0.0353192	42.0046	0.295337	740.96
IFI27L2	0.00499889	225.303	Upregulated	0.0645886	1338.52	-0.0897598	-1.17707	-0.0353531	14.5311
NR6A1	0.00499889	30.4138	Upregulated	0.080136	93.1786	0.00232976	54.5444	-0.278854	34.956
SETDB1	0.00500905	31.7022	Upregulated	0.0295851	112.6	0.121624	-61.7042	0.397345	138.769
MPZL2	0.00501783	27.2959	Upregulated	0.0868885	137.762	0.0714898	40.3546	-0.426384	-14.0733
IFITM2	0.00503322	8999.31	Upregulated	0.0259467	14311.5	0.0361334	4478.1	-0.0869527	35206.3
POR	0.00504214	159.154	Upregulated	0.117574	386.309	0.00888998	23.0041	0.127056	545.359
XPO5	0.00504692	25.5415	Upregulated	-0.0561699	-10.0061	0.109415	-81.1877	0.675129	243.714
PRDX6	0.00505529	306.162	Upregulated	0.052825	559.021	0.0227193	1325.97	0.271181	-48.3626
ARL2	0.00507974	37.5822	Upregulated	0.0302459	-63.3422		-8.2897	0.59702	258.916
PVR	0.00507974	27.0612	Upregulated	0.0719274	1.07369	0.119236	-5.22933	-0.358674	166.69
CLEC4E	0.0051254	321.722	Upregulated	0.182225	122.112	-0.000424784	299.134	-0.125372	1509.03
SYTL3	0.00512823	71.1639	Upregulated	0.00709735	106.071	0.0582818	44.8747	0.498313	275.474
PRKACA	0.00513815	171.829	Upregulated	0.0971391	81.2394	0.0294465	211.286	0.0603942	738.26
PPP1R15B	0.00514168	221.221	Upregulated	0.0733934	698.474	-0.0714053	407.408	0.219043
PSME1	0.00515305	740.046	Upregulated	0.000640789	223.742	0.0340183	31.9604	0.279211	4184.26
SAP30	0.00516344	47.6975	Upregulated	0.0801755	209.448	0.0344393	-3.36986	0.0323465	79.9597
CARD16	0.00517259	481.43	Upregulated	0.0559053	2505.19	0.0711764	36.3486	-0.127174	347.038
ARSD	0.00519022	54.0158	Upregulated	0.0575522	87.3533	-0.0183118	31.8534	0.0885766	204.76
SIGLEC5	0.00520169	75.9634	Upregulated	0.118671	340.926	-0.0243751	83.208	0.297143	31.2555
SLC43A2	0.00520801	167.233	Upregulated	0.0762121	318.103	0.0643032	645.23	0.0322112	39.8901
SLC27A2	0.00521265	2.99099	Upregulated	0.0624848	-3.60598	0.0597948	4.0279	-0.109236	17.511
TDRD7	0.00522309	156.453	Upregulated	0.0882793	406.96	0.14364	13.3039	0.197054	518.027
TLE4	0.00525051	94.0192	Upregulated	0.0426059	56.2498	0.0655013	303.754	0.055887	203.947
PA2G4	0.00525334	111.6	Upregulated	0.00945619	119.18	0.00139563	19.5109	0.20988	530.689
HAUS4	0.00526346	39.624	Upregulated	0.0345825	79.4776	0.0116559	24.6459	0.00455105	133.57
KIAA2013	0.00528434	239.043	Upregulated	0.0566515	338.491	-0.032459	154.531	-0.301126	941.513
LSP1	0.00529137	1592.49	Upregulated	0.0588476	459.073	0.0537206	1347.72	0.199552	7747.86
CNIH4	0.00530655	140.328	Upregulated	0.0632204	572.941	-0.0871065	3.26535	0.420941	265.363
CEBPB	0.00530967	1263.01	Upregulated	0.0666759	6175.4	-0.0187487	1231.44	0.158245	170.985
SLC31A2	0.00531136	446.153	Upregulated	0.0691864	2334.92	0.0421407	343.428	0.158112	-1.69963
CTU1	0.00531233	36.9786	Upregulated		48.3696	0.00698549	4.19077	0.528867	131.797
DOK3	0.00532024	501.605	Upregulated	0.101028	853.679	-0.125946	1008.3	-0.200905	1147.88
HSD17B11	0.00532024	442.037	Upregulated	0.0860525	1152.77	-0.10757	498.635	-0.37208	1001.21
KLF2	0.00534598	1282.87	Upregulated	-0.105381	5689.45	-0.0933691	501.699	0.500999	1505.8
APP	0.00535203	90.1309	Upregulated	0.0655139	258.518	-0.0227728	-82.6936	0.482374	364.436
GMPR2	0.00535203	265.744	Upregulated	0.0140969	869.159	0.108382	107.541	-0.284513	617.925
C6orf1	0.00535515	861.632	Upregulated		2584.88	-0.0392425		0.0581746
GBGT1	0.00535515	78.5056	Upregulated	0.117357	6.63691	-0.00462764	44.3191	-0.084585	420.049
MTARC1	0.00535515	198.03	Upregulated	0.348064			172.159		421.584
RNFT1-DT	0.00535515	0.505237	Upregulated				0.891426		0.119048
SLC25A22	0.00535515	26.9301	Upregulated	0.0159711	-27.7752	-0.0232628	-16.757	0.992034	205.128
SLC46A2	0.00535515	15.5683	Upregulated	0.00246849	33.8037	0.225479	-18.9746	0.327258	78.0256
SNRPB2	0.00536795	57.8847	Upregulated	-0.00807406	105.771	0.0704361	-21.0842	0.438039	262.121
ZNF787	0.00537356	102.799	Upregulated	0.045201	72.3922	-0.00166248	25.9584	0.239795	518.159
IER2	0.00539041	1856.29	Upregulated	-0.00801499	9718.45	-0.0199316	280.055	0.18201	1139.09
SLC24A3	0.00539603	22.972	Upregulated	0.233353	88.1261	-0.0500811	17.9493	0.000194319	31.5733
TJP2	0.0054073	4.16774	Upregulated	0.0453576	26.9655	0.128659	-60.5495	0.194768	58.2216
S100A9	0.00541293	12599.9	Upregulated	0.117382	13213.5	-0.00209346	6478.96	-0.22633	55907.2
TTC1	0.00541358	102.676	Upregulated	-0.0171215	166.213	0.161821	-22.6738	0.243698	472.126
HIF3A	0.00542374	22.5717	Upregulated	0.0226952	135.101	0.0223396	0.224252	0.054671	0.00549451
CARD8	0.00542668	154.351	Upregulated	0.0634856	-53.9381	0.123225	936.702	-0.16172	43.315
PSMD13	0.0054374	328.275	Upregulated	-0.02646	284.426	0.0457354	-17.244	0.540662	1701.91
PHF13	0.00546926	27.5873	Upregulated	0.0393995	77.7389	0.0364137	10.6134	0.572061	76.5238
SLA	0.00548984	1258.57	Upregulated	0.0274526	6311.49	0.0641533	1357.57	0.247488	-117.991
TUFM	0.00551282	160.675	Upregulated	-0.0182939	-314.081	0.11609	-60.7352	0.550603	1338.22
TNFRSF8	0.00552087	114.395	Upregulated	0.0775488	344.465	-0.0178734	25.5079	-0.139992	316.476
FKBP5	0.00556668	319.643	Upregulated	0.238158	18.229	0.0131852	520.836	0.153915	1378.39
MGRN1	0.005578	311.636	Upregulated	0.0762543	952.871	0.0130281	478.56	-0.312156	438.606
CORO1A	0.00558643	4050.54	Upregulated	0.0545634	1426.33	-0.0602836	1501.76	0.437889	21374.7
ZNF697	0.00558984	3.06624	Upregulated	0.126432	4.12931	0.052482	-10.6124	0.322492	24.3791
SHARPIN	0.00560141	237.501	Upregulated	0.0666975	406.233	-0.149007	214.202	0.100563	804.551
CENPK	0.00561887	35.6546	Upregulated	-0.218737	-9.50341	0.303658	172.071		15.6209
CSF2RA	0.00562172	97.5193	Upregulated	0.132073	184.546	0.151484	0	-0.268211	400.555
SPINT1	0.00562394	72.1593	Upregulated	0.0849191	33.788	-0.0275828	25.4434	0.102804	373.564
ZNF552	0.00563617	11.3484	Upregulated	0.0516109	9.00322	0.05946	58.7646	-0.18206	0.393773
CLP1	0.00568172	24.227	Upregulated	0.0418518	29.2053	0.000528159	12.4642	0.50337	103.147
IGF2R	0.00568277	1476.85	Upregulated	0.0937177	799.756	0.0211968	6396.2	0.183151	1664.83
AOAH	0.00568435	373.06	Upregulated	0.0619082	175.602	0.17082	11.9006	0.0931749	2050.53
ALOXE3	0.00569574	0.929497	Upregulated	0.0258993	3.07688	-0.035403	0.69102	0.146432	1.67216
CHMP1A	0.00569574	243.189	Upregulated	0.0231206	124.115	-0.0643709	148.788	0.121533	1186.15
MAEA	0.00570618	122.986	Upregulated	0.078577	80.4591	-0.078753	196.661	0.269613	460.526
PCBD1	0.00572092	13.7612	Upregulated	0.00515119	-4.27974	0.0656067	-4.18823	0.425931	90.5385
KCTD5	0.00572292	4.82545	Upregulated	0.0754632	35.6656	0.0610143	-12.273	0.598075
ZNF592	0.00574528	107.803	Upregulated	0.0370961	10.5669	0.0583157	186.82	0.252962	449.082
PREX1	0.00576537	2136.93	Upregulated	0.0960362	8827.2	0.0947761	3228.8	-0.12658	765.522
TRIP6	0.00576537	21.5576	Upregulated	-0.020001	11.1372	0.0843512	1.0624	0.469856	116.612
TRAFD1	0.00577954	504.563	Upregulated	0.0717372	1206.16	0.084651	17.9731	0.426843	1802.66
NT5C2	0.00578274	47.1671	Upregulated	0.0832661	125.477	0.102912	525.95	-0.158102	-368.452
BRD4	0.00580971	161.664	Upregulated	0.0282283	86.1584	0.0784585	273.054	0.160302	610.504
MT1F	0.0058483	23.578	Upregulated	0.0117709	42.5782	0.0254225	0.592593	0.265314	97.9945
APBB1IP	0.00584925	460.338	Upregulated	0.0351135	2517.15	0.131504	750.298	0.0617068	-505.648
ZBTB45	0.00584925	32.7756	Upregulated	0.0353551	61.24	0.0312257	-23.761	0.478251	158.63
DGKG	0.00586603	6.44313	Upregulated	0.0910109	16.8954	0.0824503	95.5129	-0.012765	-73.9103
OR10H2	0.00588813	120.392	Upregulated	0.0289903	721.894	0.0232589	-0.00558092	0.221812	0.192308
YWHAB	0.0058984	853.851	Upregulated	-0.020317	2388.42	0.0372903	92.137	0.42228	2642.11
NAA60	0.00591137	229.369	Upregulated	0.0530053	488.123	-0.0392816	-16.6134	0.39222	904.299
FUT7	0.00593381	130.016	Upregulated	0.109631	85.5213	-0.0394228	170.104	-0.159653	524.562
PDLIM2	0.0059381	189.471	Upregulated	0.0852794	50.2173	0.0146707	134.938	-0.0019837	951.57
STYXL1	0.00595075	154.518	Upregulated	0.050855	372.39	0.0449314	-0.871639	0.512753	554.982
EGLN1	0.00595676	320.304	Upregulated	0.0687638	1057.3	-0.0861925	1456.97	-0.168469	-592.26
OLIG1	0.00596255	308.857	Upregulated	0.0816912	1293.89	0.0299513	-31.5109	0.210614	590.434
SMPD3	0.00596833	218.947	Upregulated	0.0807626	623.994	0.0584394	-222.73	-0.267839	912.546
LRRK1	0.00598504	39.0125	Upregulated	0.0403768	23.3269	0.0498847	12.3237	0.196875	198.137
EIF4E2	0.00598651	159.173	Upregulated	-0.00720028	459.571	0.0524989	-83.7818	0.304497	578.899
CCDC22	0.00600494	93.3946	Upregulated	0.0228453	-19.4453	-0.00295685	-18.6991	0.600106	597.892
SLC12A9	0.00600598	612.992	Upregulated	0.051551	766.72	0.062629	268.487	-0.0312923	2642.66
PDLIM5	0.00605298	37.8062	Upregulated	0.042197	34.483	0.0359339	35.2314	0.0649319	156.98
NF2	0.00606579	52.7155	Upregulated	-0.0296478	139.958	0.108647	-149.904	0.310739	325.85
CAMKK2	0.00610586	259.663	Upregulated	0.101996	281.091	-0.0166996	418.339	0.204861	858.256
TBC1D2B	0.00611009	138.811	Upregulated	0.0579836	29.5519	0.11998	89.9259	0.557122	712.65
PPP4R1	0.00614844	69.6732	Upregulated	0.146718	40.2915	0.0259806	1009.85	-0.268685	-632.009
TLR2	0.00615222	764.361	Upregulated	0.185901	2941.78	-0.0344965	1245.88	-0.164362	398.518
COL25A1	0.00617548	1.10212	Upregulated	0.0616687	2.67181	-0.063698	1.73871
TMEM30A	0.00618302	147.458	Upregulated	0.118066	678.663	-0.0484782	445.362	0.158633	-239.504
MSH6	0.00619546	27.6531	Upregulated	0.0292185	95.0774	0.0769807	-52.5895	0.549844	122.775
FAM90A1	0.00619659	1.59625	Upregulated	0.088629	4.28856	0.0870675	0.406393	0.265482	4.44139
LY86	0.00623499	236.774	Upregulated	0.0710715	722.351	0.143827	-56.8458	0.0950598	754.826
PHKG1	0.00624315	2.25515	Upregulated	0.0322002	-0.345602	0.0639756	1.5241	0.620688	11.6355
QPCT	0.00624561	336.778	Upregulated	0.138391	1607.88	-0.0302112	501.587	0.00528315	-88.9084
CRISPLD1	0.00624729	0.265309	Upregulated	-0.0542407	0.291078	-0.0368205	1.46169		-0.335165
DYM	0.00624729	88.4877	Upregulated	0.030042	337.437	0.077017	-57.5951	-0.227512	251.205
MIR3649	0.00624729	0.147737	Upregulated			0.108121	0.0273973		0.307692
SAT2	0.00624729	367.12	Upregulated	0.00574301	1393.71	0.0882985	-19.6895	0.0233313	828.586
ZCCHC3	0.00624729	38.6912	Upregulated	0.00876282	-54.2215	-0.0949014	0	0.83753	285.617
RUVBL2	0.00625715	78.5974	Upregulated	-0.0248648	-10.2116	-0.0680814	-19.1273	0.699121	500.317
PTTG1IP	0.00628931	101.363	Upregulated	0.100933	662.827	-0.0411472	243.469	0.225932	-298.401
ZBTB47	0.00628931	46.1837	Upregulated	0.0937452	85.9932	-0.0601339	50.3217	-0.0741857	140.828
DOK4	0.00632082	25.4217	Upregulated	0.0687659	31.0723	0.0231487	40.619	-0.15053	80.8974
PLAUR	0.00636652	244.621	Upregulated	0.156364	415.922	0.0492623	248.195	-0.11821	803.518
PRDX1	0.00637147	160.238	Upregulated	-0.0583882	479.254	0.150516	-83.3394	0.353292	565.07
FAM200B	0.00637551	95.6354	Upregulated	0.136968	462.48	-0.0455774	88.4439	-0.0654547	22.8626
TBC1D10C	0.00637551	1390.08	Upregulated	-0.0106442	2443.45	-0.0720505	314.885	-0.0098603	5582.22
SRXN1	0.00638741	192.432	Upregulated	0.186488	1139.65	0.028544	21.6662	-0.141606	-6.80037
SHC1	0.00640328	24.1099	Upregulated	0.0470898	29.7197	0.07851	-71.3014	0.36848	185.747
UBXN2B	0.00641124	100.84	Upregulated	0.0918305	307.098	0.0370141	486.506	0.0497409	-188.742
CMTM2	0.00641223	712.176	Upregulated	0.0421842	3016.65	0.0359016	142.018	-0.733127	1115.04
TTC9B	0.00644982	1.20142	Upregulated	0.0541646	4.4981	0.0173286	0.0821918		1.35531
TGFBI	0.00645442	786.788	Upregulated	0.0611881	2879.24	0.0759169	-595.436	0.0150129	2436.78
ARF1	0.00647078	584.393	Upregulated	0.0184318	53.7231	-0.0275266	478.643	0.1631	2973.84
ARF4	0.00648308	118.239	Upregulated	0.0616214	376.607	-0.0418002	19.9604	0.258551	312.59
SAP30L	0.00652255	79.4868	Upregulated	0.0521323	112.956	0.0192961	60.6814	0.192343	303.02
VPS4B	0.00653821	62.7668	Upregulated	0.0375102	516.396	0.0855572	151.409	0.1429	-291.471
DHRS7	0.00654335	243.174	Upregulated	0.0468032	734.407	-0.0725814	186.576	0.0184378	538.066
SLC4A8	0.00655515	3.20145	Upregulated	0.0280912	2.68013	0.0212077	-50.9599	0.0856802	67.3535
HSD17B4	0.00657213	91.4952	Upregulated	0.0319524	101.047	0.106009	-130.031	0.24992	577.568
MAOA	0.00658356	2.75348	Upregulated	0.185485	-4.08284	0.0843141	23.8311	0.369162	-3.8663
KIAA0930	0.00660961	209.593	Upregulated	0.0677812	89.5408	0.0177327	-161.026	0.218866	1328.74
EHD4	0.00662327	32.3659	Upregulated	0.0332971	62.212	0.0850966	-98.5378	0.181383	230.222
MFN2	0.00662623	123.471	Upregulated	0.0889345	866.061	0.245448	128.89	-0.484856	-253.974
ZGLP1	0.00663573	15.3386	Upregulated	0.0835586	57.8934	0.0432384	-1.97971	-0.252502	36.2436
NUSAP1	0.00664038	0.476885	Upregulated	0.0336253	8.97834	0.065484	26.0015	0.137656	-32.3553
HLA-F	0.00664765	582.568	Upregulated	0.0454829	2574.97	0.12828	9.42161	0.250729	910.593
SLC2A14	0.00664883	258.31	Upregulated	0.0838558	1525.38	-0.0840485	25.3907	0.341264	-1.25092
PLSCR1	0.0066692	347.809	Upregulated	0.122646	518.27	0.214765	33.9924	0.324921	1533.93
HLA-E	0.00668821	869.422	Upregulated	0.026853	3621.99	-0.049212	1351.05	0.363197	243.15
NUDT22	0.00670128	95.2711	Upregulated	0.00474453	178.775	0.0765208	-16.8011	-0.00174909	409.573
PPP1R7	0.00670138	139.635	Upregulated	0.00565993	168.298	0.0558739	-17.0025	0.262025	686.189
G6PD	0.00672116	387.241	Upregulated	0.225484	64.8543	-0.0397814	178.731	0.244308	2079.43
SLC8A1	0.00673862	81.7559	Upregulated	0.12728	131.529	-0.0227979	345.196	0.172989	13.533
ESRRB	0.00675247	1.1817	Upregulated	0.028769	4.68352	-0.0303057	0.55657	0.0659287	1.78571
CTSA	0.00678742	335.932	Upregulated	0.165211	659.939	-0.0681979	31.7869	0.260323	1323.51
ACOT8	0.00679598	46.0178	Upregulated	-0.0053881	18.5784	0.0531282	15.171	0.0645687	242.245
LTF	0.0068274	492.757	Upregulated	0.694637	77.2777	0.280883	721.158	-0.0987201	2157.23
VPS39	0.00683431	115.603	Upregulated	0.0350756	11.0272	0.234989	34.827	0.16324	647.332
NR1H3	0.00683765	29.8749	Upregulated	-0.0254973	46.4985	-0.00941464	11.3521	-0.167272	121.601
CYFIP1	0.00685725	63.9455	Upregulated	0.144074	62.7831	0.0804263		0.0736279	256.647
STXBP3	0.00687484	155.339	Upregulated	0.0638588	751.759	0.0261088	133.767	0.0734399	46.3425
KIF3C	0.00692507	13.5945	Upregulated	0.170153	36.8179	-0.0870029	48.4754	-0.0565241	-3.75275
TNFSF12	0.00692892	195.304	Upregulated	0.0990037	524.646		-30.6225	0.121692	482.277
PDLIM7	0.00695513	533.693	Upregulated	0.121759	398.433	-0.102672	460.976	-0.0776845	2342.81
COL8A2	0.00696116	5.60018	Upregulated	0.0415536	8.60662	0.0122361	3.36479	0.0997018	21.4762
MYO1F	0.00699893	3954.59	Upregulated	0.0483262	7639.2	0.082643	2726.06	-0.118786	13362.3
NMNAT1	0.00700057	10.0803	Upregulated	0.0719821	21.2956	-0.0443846	26.7529	0.105583	12.3004
JTB	0.00702987	446.912	Upregulated	-0.0252784	991.853	-0.0889491	121.302	0.296954	1568.14
KAZALD1	0.00703851	0.7939	Upregulated	0.0671524	4.5219	0.0305971	-0.369356	0.619336	-0.106227
KREMEN1	0.00705036	113.227	Upregulated	0.152241	131.448	0.154299	513.134	-0.059863	34.5348
PSAP	0.00705714	6327.33	Upregulated	0.0365219	1696.5	0.0520296	170.723	0.241895	36096.5
ACSBG1	0.007077	1.49099	Upregulated	0.048614	0.851351	0.00609889	4.4551	0.130545	3.45421
QRICH2	0.00710217	8.40635	Upregulated	0.0705929	0.81804	0.0339495	-13.7565	0.786625	62.4853
RMI1	0.00711207	28.2092	Upregulated	0.097058	125.723	-0.0906862	44.2095	0.232062	-0.915751
HSBP1P1	0.00713931	0.925982	Upregulated				1.51497		0.336996
TES	0.00713931	99.5125	Upregulated	-0.0197825	-29.9131	0.0754178	-39.6692	0.673021	665.929
UBLCP1	0.00713931	112.742	Upregulated	0.00581261	694.412	-0.0944568	32.7154	-0.0607649	-50.5238
ZNF566	0.00713931	1.9192	Upregulated	-0.213299	-3.28095	0.116075	-10.1253	0.738457	24.2802
FBXL5	0.00714036	923.766	Upregulated	0.0966607	3515.05	-0.0276223	1451.32	0.137426	576.026
KIF13A	0.0071811	73.6767	Upregulated	0.0868002	23.1397	0.138106	405.851	-0.128028	12.9725
ARSB	0.0071838	20.6087	Upregulated	0.0761685	8.98118	0.044877	-52.5408	0.164345	166.927
RGS19	0.00722489	1686.21	Upregulated	0.0976957	7936.97	-0.110677	429.153	0.05879	1751.1
FKBP15	0.00723821	42.0498	Upregulated	0.0172568	111.643	0.220792	-23.7504	0.534575	163.634
MAP3K5	0.00723862	112.391	Upregulated	0.053999	336.176	0.0599713	264.292	0.0511406	73.7106
HLX	0.00738177	136.873	Upregulated	0.120655	71.1808	-0.0737437	106.71	0.0659279	643.233
SYN2	0.00739111	2.27102	Upregulated	0.0399124	11.4367	0.00391503	1.74226	0.416142	-0.0128205
EXOSC1	0.00739819	52.3692	Upregulated	-0.065582	106.406	0.0877303	-18.9858	0.185267	226.588
SMAD1	0.00742654	1.18134	Upregulated	0.133644	16.7248	0.0734721	5.52613	0.360696	-15.7308
FOLR1	0.00744771	0.393572	Upregulated	0.0127497	1.23698	0.0395044	0.161339	0.0225783	0.888278
SMTN	0.00747635	9.08338	Upregulated	0.0376928	-4.12292	-0.0597868	4.98478	0.645842	53.0147
SCPEP1	0.00749881	172.353	Upregulated	0.0361636	123.063	0.193473	-113.54	0.0680355	1024.29
TMEM208	0.00751423	113.505	Upregulated	-0.0246608	361.645	0.00245781	-7.48351	-0.144525	327.038
QKI	0.00753072	216.863	Upregulated	0.0915407	57.1194	-0.0277986	1110.15	0.0810726	133.769
KIF13B	0.00754396	10.9752	Upregulated	-0.0351583	123.367	0.162461	-150.108	0.505103	91.9597
OSBPL11	0.00754793	39.2066	Upregulated	0.0820854	307.837	-0.00560889	182.095	0.157228	-254.927
PIK3R5	0.00756682	360.3	Upregulated	0.0453198	24.0838	0.0437971	570.45	0.0102295	1567.17
LBR	0.00757049	693.725	Upregulated	0.0778373	4450.59	-0.0478792	1273.87	0.017776	-1562.16
PINK1	0.00757049	260.811	Upregulated	0.130425	462.375	-0.0338761	864.726	-0.159062	237.83
LAPTM4A	0.00757367	444.899	Upregulated	0.018369	1813.33	0.0108321	5.68696	0.254947	850.09
DCTN2	0.00760777	155.481	Upregulated	0.047207	155.417	0.0450414	-3.00558	0.0782975	780.302
TLR1	0.0076104	399.135	Upregulated	0.0940838	1597.57	-0.0655554	1565.68	-0.258399	-768.211
OAZ1	0.0076364	5151.61	Upregulated	0.0146025	20308.7	0.032964	4014.55	-0.399658	6586.76
GYG1	0.00765045	63.456	Upregulated	0.112263	146.793	-0.0383567	68.7042	0.494075	164.67
PSME2	0.00766348	1112.2	Upregulated	-0.0553989	4685.41	0.0659072	-68.0269	0.359996	2055.44
SLPI	0.00767422	59.4384	Upregulated	0.319733	632.573	0.159474	75.6748	-0.25048	-351.846
MCTP2	0.00768529	163.889	Upregulated	0.0837522	80.0438	0.105475	901.319	-0.149326	1.93223
LASP1	0.0077537	574.573	Upregulated	0.0422103	262.389	0.0133168	949.66	0.000413054	2235.33
DMXL2	0.00775789	35.911	Upregulated	0.0990592	32.9214	0.173543	390.366	0.0579422	-208.152
SPAST	0.00780507	32.784	Upregulated	0.0635818	75.959	0.0329527	115.644	0.306326	4.6978
PAQR4	0.00781966	3.67037	Upregulated	0.0941505	5.13278	0.0634709	-8.56672	0.318693	24.9799
ATP1B3	0.00785399	278.349	Upregulated	0.0415169	1397.75	0.0679334	-46.5287	0.340716	318.421
IFNAR1	0.00789844	178.517	Upregulated	0.055811	656.985	-0.0301583	540.739	0.229564	-126.875
DPY19L1P1	0.00790722	7.93884	Upregulated	0.10665	10.6081	-0.0412632	32.4546	0.257737	4.24725
DEFA4	0.0079757	106.88	Upregulated	0.666466	386.446	-0.13078	49.6301	-0.338066	205.004
STK4	0.00798654	220.73	Upregulated	0.0173023	570.847	0.0890016	548.726	0.0665057	204.637
MFSD10	0.0080032	215.916	Upregulated	0.0676863	-55.0818	-0.0382384	14.5226	0.479664	1335.55
ANXA4	0.00801697	41.8683	Upregulated	0.0858828	210.683	0.059878	-78.1487	0.322829	118.207
BOP1	0.00803123	90.0525	Upregulated	0.0218376	-18.1983	-0.0442188		0.774341	467.709
GNB1	0.00803123	470.743	Upregulated	0.0201241	1010.77	0.0615675	87.0157	0.288447	1726.3
PRSS41	0.00803123	4.13522	Upregulated		1.87345	-0.0265444	-2.4348	-0.2635	21.5275
RNU6-540P	0.00803123	1.58657	Upregulated				3.12735		0.0457875
MSL1	0.00804456	409.056	Upregulated	0.0607409	1297.97	-0.0492176	1637.01	-0.282374	-480.368
PADI2	0.00804609	319.357	Upregulated	0.0412484	133.553	0.0954354	895.79	0.0782388	886.582
HPS6	0.00804791	274.007	Upregulated	0.0603484	1254.05	-0.0409182	19.0776	0.311578	370.584
TALDO1	0.00810827	3700.18	Upregulated	0.089632	12199.1	0.0100751	1467.45	-0.224923	8534.67
EXOSC4	0.00811101	18.2226	Upregulated	0.0718245	23.2648	0.0436378	-0.176053	0.200879	85.9304
SH2B2	0.00813106	194.038	Upregulated	0.151504	862.238	-0.0581555	13.584	0.0583236	288.253
BAK1	0.00813608	140.406	Upregulated	0.0437281	80.4638	0.0292977	-19.2572	0.356852	780.8
ACSL3	0.00814266	31.7144	Upregulated	0.0318926	6.86635	0.00396029	3.42973	0.346611	179.608
PSMD2	0.00815553	242.768	Upregulated	0.00562885	482.628	0.142184	-34.3415	0.407684	1007.77
TRAF7	0.00816136	95.903	Upregulated	0.0352108	68.8428	-0.0279015	2.06646	0.495935	504.005
TGS1	0.00816404	8.30836	Upregulated	-0.0877755	41.2345	0.164093	-63.2491	0.601662	71.1868
PSEN1	0.00819146	121.877	Upregulated	0.0141407	71.6747	0.130231	318.163	0.0778485	341.201
HADHA	0.00821139	360.215	Upregulated	-0.011797	62.6181	0.107776	-46.3734	0.528187	2144.42
APH1B	0.00821469	72.1385	Upregulated	0.0992744	343.945	0.0794453	49.8737	-0.369442	39.2033
PDZD8	0.00826061	46.2589	Upregulated	0.108882	152.165	0.0857772	232.785	-0.222453	-107.368
CUX1	0.00833016	96.8885	Upregulated	0.0410738	25.5991	0.00197874	2.61441	0.307235	552.767
UGGT1	0.00835209	46.8386	Upregulated	0.0131615	84.4023	0.139826	-93.8311	0.552625	289.755
NFKBIB	0.00839172	3.56687	Upregulated	0.0575766	4.21611	-0.0860151	16.2298	0.578957	0.404762
ACTG1	0.00840047	2612.87	Upregulated	0.0146016	1614.68	0.0253283	-105.437	0.418668	14167.5
RNF185	0.00844174	84.6705	Upregulated	0.0321802	-6.055	0.0263732	40.5977	0.0920568	473.33
DHH	0.00846174	0.816738	Upregulated	0.0790445	3.08573	-0.0170788	0.52207		0.413919
ANXA5	0.00846761	346.195	Upregulated	0.0338891	328.018	0.237106	-202.301	0.100733	1951.08
TNNI2	0.00846955	58.9048	Upregulated	0.086087	211.395	-0.0398118	12.1025	-0.575178	130.46
UBB	0.00847797	1239.73	Upregulated	0.0531332	1564.74	0.133179	5519.93	0.0633908	353.456
FAM124B	0.00848005	2.97829	Upregulated	0.156763	9.14566	0.0507225	-2.68239	0.0689787	11.13
ANG	0.00848517	14.5396	Upregulated	0.206018	57.4786	0.00519523	3.03399	-0.141977	26.6557
GPR35	0.00852124	46.405	Upregulated	0.0375315	1.71271	0.0124239	5.36936	0.107344	271.19
NCEH1	0.00857938	14.7716	Upregulated	0.263512	68.4558	0.0497831	-18.1801	0.176271	37.8645
PRDX5	0.00859484	665.086	Upregulated	0.0838496	1296.66	-0.198947	233.777	-0.189091	2460.39
SLC38A2	0.00862769	195.323	Upregulated	0.0178466	152.515	0.00683227	345.441	0.0774313	673.881
MGAT1	0.00864518	856.053	Upregulated	0.0556582	191.363	-0.0147473	265.365	0.0464639	4679.5
SAFB	0.00865846	239.121	Upregulated	-0.021376	119.632	0.157258	-124.77	0.542288	1439.18
EIF2AK2	0.00872974	492.586	Upregulated	0.0842114	392.681	0.143054	-259.173	0.142325	2821.64
NAIF1	0.00874567	46.522	Upregulated	0.0208594	164.198	-0.0362604	16.2004	0.192205	98.5568
ATXN1	0.0087563	42.1048	Upregulated	0.033396	24.9714	0.156234	251.674	0.209519	-24.4158
LAMTOR1	0.00876162	258.983	Upregulated	0.0519898	152.906	-0.0622542	67.7575	0.138512	1333.1
PLEKHB2	0.00877006	83.0832	Upregulated	0.0280069	228.976	0.0633107	-40.6839	0.440192	309.676
IRF1	0.00878944	777.686	Upregulated	0.0211328	284.414	0.0413758	1669.06	0.00849462	2712.57
CYTH2	0.00886316	134.002	Upregulated	-0.0328821	16.8307	0.0241108	27.6017	0.152162	759.438
MIEN1	0.00887147	190.433	Upregulated	-0.00318928	769.488	-0.0295941	33.2466	-0.0924826	339.987
PARP9	0.008883	407.424	Upregulated	0.0810261	38.9831	0.182801	138.211	0.072311	2267.02
GMIP	0.00888618	585.944	Upregulated	0.106408	912.321	-0.0172284	883.085	0.00959449	1720.16
OR2A9P	0.00888618	1.36343	Upregulated		-23.0951		2.33486	0.624218	25.5897
APCDD1	0.00892304	3.96056	Upregulated	0.203706	17.1712	-0.0874713	-5.73161	-0.171595	12.3791
ELMO2	0.00892304	84.308	Upregulated	0.00338836	77.171	0.0595911	45.0731	0.709326	382.832
LINC02631	0.00892304	11.1171	Upregulated				10.6352		11.5989
NDUFV2	0.00892304	9.57905	Upregulated	-0.0344501	64.4539	0.188439	-10.4434	-0.124233	3.43407
NIPA2	0.00892304	119.299	Upregulated	-0.0255024	765.193	-0.0767634	-53.45	-0.6003	4.75458
TMEM249	0.00892304	1.63154	Upregulated			-0.0867366			3.34982
VCPIP1	0.00892638	103.037	Upregulated	0.0222442	156.288	0.106359	333.763	0.046616	127.996
PPP1R10	0.0090036	25.8116	Upregulated	0.0233406	129.275	0.0670892	25.2933	0.207426	0.003663
FIG4	0.00906354	39.7609	Upregulated	0.0643373	14.0978	0.104647	-17.1852	0.30958	241.174
CXCL14	0.00910185	0.639432	Upregulated	0.0591978	2.58339	0.0413409	0.145104		0.368132
FSCN1	0.00914401	34.86	Upregulated	0.11858	157.103	-0.108404	0.163876	-0.44838	52.3315
CEP63	0.00915375	102.311	Upregulated	0.0867547	501.505	-0.01276	269.538	-0.455931	-156.793
CHRAC1	0.00915679	39.0527	Upregulated	0.0444099	17.7945	0.0180569	-13.2141	0.277724	229.396
SLC10A3	0.00916061	67.5174	Upregulated	0.0641184	15.4577	-0.0216831	7.57534	0.270852	381.758
NDUFC1	0.00916876	148.344	Upregulated	-0.0172657	654.77	-0.0210029	-10.6002	0.440726	245.489
CCDC97	0.00917269	162.366	Upregulated	0.0192983	445.085	0.0366733	1.00304	0.254752	527.797
SRBD1	0.00918543	21.9704	Upregulated	0.0883636	68.2486	0.0693141	-22.3541	0.332569	85.4377
ACSS2	0.00919685	58.3143	Upregulated	0.116045	4.95706	0.022922	7.94267	0.282994	336.564
INO80C	0.0092103	23.4493	Upregulated	0.0414389	23.357	-0.0484272	-2.25977	0.517657	119.088
KIAA0513	0.00922306	481.366	Upregulated	0.104342	2078.13	0.0452348	354.495	0.205307	455.22
RNF222	0.00923178	33.1901	Upregulated		163.655	0.0935959	-0.789447	-0.184515	3.17582
LRP10	0.00925079	1117.01	Upregulated	0.0982536	120.226	0.0411346	3667.69	0.0851649	2913.9
MEP1A	0.00926851	0.577531	Upregulated	0.0906733	1.66844	0.0355162	0.0289193		1.0641
ABCC6	0.00927431	6.35569	Upregulated	0.0911368	16.7857	-0.115915	3.69001	-0.342467	18.0256
MBOAT7	0.00929528	278.097	Upregulated	0.0512244	1016.64	0.0443718	451.096	-0.353913	201.103
PLXDC2	0.00930461	103.547	Upregulated	0.161133	333.682	0.00328068	171.819	0.535192	115.079
HMBS	0.00930643	48.6773	Upregulated	0.05966	60.067	0.0322357	131.925	-0.32387	100.304
JAK3	0.00931201	592.003	Upregulated	0.0244484	540.535	0.124864	448.849	-0.28745	2562.77
PRAM1	0.00931759	730.637	Upregulated	0.121295	1792.68	0.0517539	301.692	-0.0955709	2289.37
ACTN1	0.00933435	721.69	Upregulated	0.056876	380.631	0.0465268	1931.65	0.0521192	2017.7
SMAP2	0.00934699	1451.42	Upregulated	0.0929213	270.948	0.0337268	2095.69	0.0982724	6341.68
MLKL	0.00936743	272.128	Upregulated	0.139564	375.89	0.198337	1.21969	0.194049	1255.13
DTX3L	0.00937153	297.058	Upregulated	0.0199407	64.7023	0.0924236	5.05835	0.126576	1712.35
ACO1	0.00939416	37.7403	Upregulated	0.055534	3.35082	0.0976235	-9.61238	0.612541	231.938
TXNL4A	0.00940162	87.6865	Upregulated	0.0280311	203.273	0.0249797	-26.1416	0.63213	348.302
RB1	0.00940853	28.5561	Upregulated	-0.0112624	235.092	0.0640396	-44.4627	0.353764	-19.6996
CHADL	0.00941665	1.48653	Upregulated	0.0491432	1.29512	0.0368306	0.456114	0.42813	6.65385
VAV3	0.00942413	76.4675	Upregulated	0.0480732	572.573	0.0377135	102.626	0.472524	-216.952
SNX32	0.00944104	1.73506	Upregulated	0.056934	-10.027	0.0177282	1.63876	0.319203	18.4048
MTHFD2	0.00945705	32.4719	Upregulated	0.0451495	103.291	0.107499	-24.1375	0.274958	115.251
STK3	0.00945783	20.3556	Upregulated	0.0787578	57.9878	0.00183293	22.0142	0.0712302	41.9799
LRPAP1	0.00946168	188.497	Upregulated	0.0866225	78.4143	-0.0422383	-39.8072	0.31749	1092.01
WDTC1	0.00950324	293.394	Upregulated	0.0566239	-22.8629	0.110456	556.032	0.0394607	1226.99
GPAA1	0.00951254	205.507	Upregulated	0.0579559	306.128	-0.0465325	-2.68595	0.265444	929.321
CBR1	0.00951458	63.0667	Upregulated	0.0752434	78.2784	0.0192312	-35.4125	0.170503	335.269
CLN3	0.00957146	14.2796	Upregulated	0.0390599	-14.463	0.0379027	27.4069	0.320029	72.337
SBF1	0.00964007	365.668	Upregulated	0.0148498	312.663	0.120001	-137.533	0.102872	2018.64
CMTM4	0.00965762	11.9227	Upregulated	0.0667673	51.8577	0.0645231	-2.61593	0.0915904	22.0714
DCTN3	0.00969544	95.1634	Upregulated	0.0348329	89.3601	0.0127314	0.0202943	0.634677	480.918
BPI	0.00972177	45.8414	Upregulated	0.559283	-23.8531	-0.0618477	127.602	0.194539	170.608
MRPL11	0.00972177	31.094	Upregulated	-0.134652	-53.6567	0.0831947	-16.3709	-0.102277	256.745
ARL8B	0.00972496	84.4437	Upregulated	0.0303837	168.582	0.0499217	15.758	0.262684	321.98
HS6ST1	0.0097511	40.4346	Upregulated	0.0427041	133.465	-0.0536895	-21.8787	0.678591	130.353
AAMP	0.00976674	176.18	Upregulated	0.00869964	-46.3911	0.102994	-47.1101	0.401741	1150.07
UROD	0.00976692	104.612	Upregulated	0.00763685	57.3896	0.112727	9.91781	-0.204295	560.447
IRS2	0.00980121	231.762	Upregulated	0.147956	481.189	0.00559974	627.349	0.124769	281.756
CCZ1	0.00981218	31.9872	Upregulated	-0.00202777	148.01	0.16998	-27.1994	0.314423	70.63
CLC	0.00981473	1296.01	Upregulated	-0.188755	3034.38	-0.00470376	-215.453	-0.584843	4957.94
DYTN	0.00981473	55.6991	Upregulated		276.368	-0.0252338	3.1035	-0.525609	-0.424908
IRAK3	0.00981473	6.6132	Upregulated	0.295918	104.649	0.0429234	5.65195	0.0488107	-71.0092
PIGO	0.00981473	7.60776	Upregulated	0.011089	-27.6564	0.0117722	-50.8924	0.668848	123.504
TSPEAR	0.00981473	5.32072	Upregulated	0.0218634	5.1418	-0.0142198	6.99848	-0.952568	20.7289
C1RL	0.00985754	24.4169	Upregulated	0.165898	55.3182	0.034143	355.114	-0.418228	-263.712
PTPN6	0.0098949	1088.39	Upregulated	0.0459136	-47.7681	0.0669947	227.01	0.419174	6350.55
PNPLA2	0.00990661	422.837	Upregulated	0.149847	104.755	-0.0281814	731.731	0.0440148	1700.37
UBE2H	0.00992399	20.7346	Upregulated	0.0860275	104.17	0.180458	-139.466	-0.10666	159.544
CPEB4	0.00999476	104.636	Upregulated	0.0549218	303.255	0.037774	482.105	0.199465	-157.835
MOB3A	0.00999834	951.002	Upregulated	0.0306674	74.6052	0.00985929	1449.88	0.076398	4181.41
ARPC1A	0.0100145	32.2764	Upregulated	-0.0617052	112.212	0.0492533	-22.175	0.1453	103.489
SLC19A1	0.0100233	385	Upregulated	0.080514	194.085	0.00726028	777.993	-0.347608	1338.18
KDM4A	0.01004	22.611	Upregulated	0.000315984	79.0931	0.148021	-102.337	0.342273	158.419
CRISPLD2	0.010041	183.241	Upregulated	0.0789099	60.5653	0.0462642	932.813	0.243538	105.7
PSMD4	0.010041	680.698	Upregulated	0.0373124	2820.51	0.0449329	17.5195	-0.369764	1246.45
CAP1	0.0100717	395.249	Upregulated	0.0208063	949.243	0.0292756	1245.83	0.0436859	176.33
ACADVL	0.0101252	472.939	Upregulated	0.0466504	881.152	0.0536977	-20.5033	0.523531	1976.36
PLA2G15	0.0102905	82.3321	Upregulated	0.120464	391.787	-0.0231311	-22.0751	0.260081	123.923
ZNF646	0.010308	111.734	Upregulated	0.0649559	131.993	-0.119388	267.191	-0.0103926	271.282
GGCX	0.0103172	24.1171	Upregulated	0.0186429	6.7684	0.0383288	-14.2907	0.490065	151.678
P2RX1	0.0103414	100.24	Upregulated	0.0946699	64.8836	0.0454651	262.313	0.162679	273.94
GUSB	0.0103446	234.453	Upregulated	0.0135222	829.913	0.0588885	-77.5084	0.268627	653.969
KCNAB2	0.0103656	344.649	Upregulated	0.0245789	33.2851	0.0203925	-134.203	0.246498	2168.52
RGS14	0.0103807	553.502	Upregulated	0.0884399	270.727	-0.0515864	451.931	0.020296	2598.3
BRK1	0.0104097	427.179	Upregulated	-0.0381672	1078.1	-0.110381	83.1111	0.0240836	1401.99
RBKS	0.0104351	6.72323	Upregulated	0.0538826	22.9554	0.0370391	1.48148	-0.391684	16.2033
NDRG1	0.0104383	162.275	Upregulated	0.053105	38.0469	0.0520617	170.214	0.526777	764.758
ERLIN1	0.0104814	44.0799	Upregulated	0.0862441	8.48227	0.13192	-1.52613	0.138478	257.167
TYK2	0.0104937	587.938	Upregulated	0.0358051	62.5146	0.0278315	512.597	-0.082584	2952.53
INHBA	0.0105032	2.03967	Upregulated	0.142246	1.4683	-0.0130076	8.60325	-0.365675	2.40293
DENND5A	0.0105059	260.404	Upregulated	0.0166953	1012.33	0.0645468	765.762	0.111056	-215.859
PHF23	0.0105171	126.848	Upregulated	0.055808	170.475	-0.0469047	17.5647	0.387075	572.65
PAF1	0.0105445	116.18	Upregulated	0.0248628	94.8819	0.0576282	-43.1659	0.296069	644.984
COX7A2	0.0105501	536.497	Upregulated	-0.0130011	2726.8	0.0023123	-7.35261	-0.167413	499.711
PGLS	0.0105501	624.187	Upregulated	0.00333975	2104.73	-0.0976003	-4.25419	-0.224569	1644.96
NAGA	0.010572	204.302	Upregulated	0.0397585	169.335	0.133477	-139.802	0.188376	1195.92
ZDHHC3	0.010572	87.0432	Upregulated	0.0644563	251.031	0.0611294	103.819	-0.280671	167.564
RTN4	0.0105857	715.65	Upregulated	0.0629972	4479.49	0.0188328	229.767	0.291366	-415.731
CTDSP1	0.0106187	1226.01	Upregulated	0.0301769	2748.6	-0.0843436	391.661	-0.0211042	4215.9
SIDT2	0.0106506	145.197	Upregulated	0.0229571	435.067	0.0620995	3.94216	0.241783	431.844
KCNJ15	0.0106517	566.37	Upregulated	0.151956	506.951	-0.00783392	2333.25	-0.176219	558.053
SFXN5	0.0107036	58.6621	Upregulated	0.0537058	28.7945	-0.0152483	55.2171	0.0412466	267.881
CEL	0.0107063	2.10607	Upregulated	0.067345	-3.81253	-0.0433368	-0.751903	0.147529	17.0293
CPXM2	0.0107063	0.817012	Upregulated	0.050745	1.1988	0.00295304	2.05784		0.774725
LOC101928317	0.0107063	0.225021	Upregulated	0.225021
TRIM28	0.0107063	515.715	Upregulated	-0.046442	-290.881	-0.017542	-122.62	0.882892	3506.97
IFNK	0.0107346	1.817	Upregulated	0.108112	7.02254	0.0580934	0.236936		1.65934
SLC38A10	0.0107565	359.128	Upregulated	0.0318617	306.074	-0.0943647	-34.1466	0.185971	1882.72
SUSD1	0.010803	44.6999	Upregulated	0.117851	160.19	0.0979467	-105.324	0.274426	212.842
CDK5R1	0.0108514	45.5522	Upregulated	0.146492	157.488	-0.147932	97.8864	-0.293999	18.2344
S100A6	0.01086	4482.57	Upregulated	0.0290396	16000.1	-0.0935287	327.234	0.0503888	10568.1
GMFG	0.0108777	3857.44	Upregulated	0.0116717	20146.4	0.106345	188.91	-0.572008	2809.74
B9D2	0.0109185	101.797	Upregulated	0.0231892	419.546	0.00017223	28.0076	-0.270525	163.478
SLC2A3	0.0109528	74.8571	Upregulated	0.0614324	119.479	0.0329433	869.557	0.313153	-540.3
MYADM	0.0109547	427.185	Upregulated	0.0180614	2028.22	0.0578467	720.438	0.128177	-185.747
MXD3	0.0109622	127.552	Upregulated	0.111276	337.107	-0.0634054	100.893	-0.340761	327.606
FGL2	0.0109641	769.84	Upregulated	0.0061981	445.151	0.0290966	873.327	0.190762	3300.34
SPACDR	0.0109858	7.96039	Upregulated	0.0903218			3.46119		20.3297
ARHGAP27	0.0110244	514.681	Upregulated	0.0621838	2761.27	-0.0499849	250.592	-0.228057	76.4414
CEBPD	0.01105	484.865	Upregulated	0.127445	501.427	-0.128347	931.456	0.035674	1476.27
NDUFC2	0.0110704	72.1111	Upregulated	-0.0366221	280.984		-11.5327	0.345698	90.7949
CTR9	0.011085	14.9173	Upregulated	0.0491679	83.2522	0.188838	-72.0944	0.554821	77.5531
PRR19	0.0111205	1.30012	Upregulated	0.0295059	0.609367	0.00752982	-0.198376	0.812386	6.54029
GBP1	0.0113092	670.538	Upregulated	0.0344506	22.6908	0.293656	109.309	0.269305	3890.63
SRM	0.011361	58.9929	Upregulated	0.0274233	-126.64	0.100769	-55.7874	0.355829	535.901
EIF6	0.0113625	138.532	Upregulated	0.0190751	184.106	0.0936721	-16.2856	0.136939	663.119
ENTPD1	0.011411	124.082	Upregulated	0.10051	63.7065	0.0772062	702.065	-0.186158	-21.2692
ABCA13	0.0114112	37.9712	Upregulated	0.175647	3.07419	0.00780392	209.7	-0.115315	14.9853
CD274	0.0114117	76.6242	Upregulated	0.137987	41.4377	0.173216	56.3765	0.182269	361.438
SPHK1	0.0114128	16.4841	Upregulated	0.153184	-22.1488	-0.0508625	18.3699	-0.136619	102.718
DOCK4	0.0114887	70.2044	Upregulated	0.173243	30.8611	0.117334	375.214	-0.0750466	14.9359
TRAF6	0.0115089	10.8889	Upregulated	0.00806418	50.6119	0.0659752	38.828	0.683621	-24.8645
SLC22A16	0.0115264	6.65197	Upregulated	0.209957	16.81	0.0307723	9.94723	0.117141	12.7967
TRAPPC5	0.0115497	100.704	Upregulated	0.0307721	530.236	-0.102285	4.35261	0.0696329	69.6392
PHF2	0.0115563	67.6675	Upregulated	0.0273249	195.962	0.0929245	71.3049	0.401724	138.216
KLHL18	0.0115766	33.4364	Upregulated	0.0626184	34.7876	0.122962	-12.2369	0.273934	177.608
ORM1	0.0115865	117.388	Upregulated	0.24911	351.928	-0.229716	33.5753	-0.434492	319.24
TBKBP1	0.0115865	133.2	Upregulated	0.101928	-44.9162	-0.129129	124.507	-0.00300778	719.639
FAM27E3	0.011596	5.60394	Upregulated	0.0507903	23.9317	0.0594886		0.195704	3.78205
C14orf2	0.0115978	157.33	Upregulated		472.437	0.0249471		-0.473231
HSPB1	0.0115978	53.8984	Upregulated	-0.0447301	-350.465	-0.103572	67.4384	1.17921	605.386
SLC15A4	0.0115978	164.841	Upregulated	0.0676941	193.633	0.0382681	666.461	-0.55273	129.401
SPNS3	0.0115978	70.7908	Upregulated	0.0833654	-0.940412	0.000671609	-49.3283	-0.640196	475.57
VPS16	0.0116291	125.293	Upregulated	0.0250993	105.757		21.6286	0.17364	498.883
EPS8L1	0.0116355	6.67439	Upregulated	0.0479368	14.1885	-0.0532584	-3.20142	0.23671	28.8278
FAM13A-AS1	0.0116453	42.0691	Upregulated	0.0495993	83.216	0.121273	151.804	-0.566881	17.7912
IPCEF1	0.0116956	53.3642	Upregulated	0.015809	13.5669	0.0521792	252.807	0.379443
LRRC25	0.0117044	641.062	Upregulated	0.118108	1121.46	-0.0390267	777.787	0.235968	1946.81
TCN1	0.0117044	36.4528	Upregulated	0.411182	64.6802	0.0583743	39.2598	-0.141325	114.449
ATP6V0D1	0.011729	887.286	Upregulated	0.113505	424.467	-0.00908068	564.951	0.0479828	4334.15
GALK2	0.0117443	17.1415	Upregulated	-0.0734739	64.764	0.0818908	-12.7499	0.405183	50.4212
TRIM25	0.0117668	764.258	Upregulated	0.0672517	1895.64	0.0354665	735.391	0.0250346	1954.39
HIRA	0.0117691	96.4885	Upregulated	0.0561145	446.509	0.0330364	-0.485033	0.204253	132.614
MYD88	0.0117736	435.66	Upregulated	0.0820715	802.318	0.0496575	667.029	-0.0988894	1144.58
FREM1	0.0117758	0.620824	Upregulated	0.0158076	2.64711	0.0227249	1.14764	0.450269	-0.558608
IMPDH1	0.0117893	2469.98	Upregulated	0.125547	11113.2	-0.0767735	652.211	0.0316184	3054.34
RAC2	0.0118027	1760.76	Upregulated	0.0287413	1670.44	-0.0969954	331.912	0.248609	8562.05
TPI1	0.0118044	745.351	Upregulated	0.000965581	107.375	-0.0942151	-21.757	0.478066	4386.1
RLN2	0.0118148	1.74223	Upregulated	-0.129046	-2.95499	-0.0057275	1.96043	0.449013	11.1337
APAF1	0.0118332	121.594	Upregulated	0.0508836	53.8389	0.112602	809.951	-0.198211	-134.189
UBC	0.0119376	4335.87	Upregulated	-0.0152717	10345.8	0.0200175	982.744	0.127943	14686.5
CSK	0.0119511	771.284	Upregulated	0.0234355	-236.58	0.0293969	372.381	0.270262	4491.58
PIPOX	0.0119579	1.42239	Upregulated	0.0459646	0.12224	0.084297	2.94013	0.116445	5.22527
DDIT3	0.0119715	41.9483	Upregulated	0.0613287	112.425	-0.0063371	23.8442	0.0433929	115.322
CALCOCO2	0.0119924	4.06445	Upregulated	-0.00474284	47.8889	0.121415	-28.1852	0.50192
DPY19L3	0.0120103	4.03979	Upregulated	0.10479	6.24881	0.119876	132.104	-0.265003	-114.073
CD300LB	0.0120123	132.624	Upregulated	0.0962171	50.4995	0.0712249	83.8214	-0.483374	661.742
WDR1	0.0120191	586.622	Upregulated	0.0209306	43.5189	-0.00131749	343.429	0.332736	3132.43
SRGAP2	0.0120259	181.518	Upregulated	0.0249252	250.716	0.26638		0.18184	656.401
RAD9A	0.0120461	42.5437	Upregulated	-0.00284348	-68.2601	0.0691398	-6.05023	0.330239	329.176
SLC22A4	0.0120998	63.9706	Upregulated	0.156219	355.077	0.0543494	143.114	-0.0689716	-114.509
SYNGR2	0.0121357	654.96	Upregulated	0.000481231	1512.13	-0.0234978	-32.0558	0.37662	2449.34
TBL1X	0.0121559	153.937	Upregulated	0.0194896	296.709	0.109771	409.651	0.0997271	217.033
C5AR1	0.0121717	341.149	Upregulated	0.0647091	957.691	-0.0606799	2225.69	0.0114576	-1136.5
STAM2	0.0122247	16.1803	Upregulated	0.043411	17.395	0.0286238	101.344	0.0412178	-21.7711
SLC9A8	0.0122257	88.3241	Upregulated	0.109724	105.501	0.0787961	336.117	-0.286638	88.4249
INSC	0.0122259	3.62168	Upregulated	0.250601	17.3724	0.0340677	7.66362	0.0265849	-3.61722
MRPL44	0.0122316	48.0914	Upregulated	0.0273282	50.3128	-0.0188313	22.1456	0.0777715	216.004
OSBPL1A	0.0122544	15.4818	Upregulated	0.111059	40.7757	0.0699252	-11.9406	-0.365266	64.2399
CNNM4	0.0122563	17.9354	Upregulated	0.0976279	74.0571	0.0415591	-34.208	0.276311	67.348
STEAP3	0.0122593	5.85021	Upregulated	0.0267224	5.84452	0.129545	-22.9853	0.0582585	52.0275
RNF135	0.0123381	211.229	Upregulated	0.149891	778.278	0.00192552	45.864	-0.192147	443.273
CACNG8	0.0123556	15.1337	Upregulated	0.0754939	2.08015	-0.0232081	-31.5916	0.162662	120.099
SLC38A6	0.0123556	13.1812	Upregulated	-0.0108607	34.7818	0.0891915	-17.587	-0.348662	62.163
ZNF687	0.0123556	60.0264	Upregulated	0.133738	-29.3619	-0.0195299	200.887	-0.0320737	188.551
SDSL	0.0123586	20.7537	Upregulated	0.0473175	93.6255	-0.00388552	5.85388	0.0175105	24.9817
SLC39A1	0.0123689	145.827	Upregulated	0.0620567	34.5627	-0.10892	75.4825	-0.129907	765.095
TMEM88	0.0123912	50.4136	Upregulated	0.043847	204.384	0.0637781	11.3836	-0.195277	86.8022
SRD5A1	0.0124261	24.2727	Upregulated	0.0486196	26.443	0.193904	-19.1608	0.038021	138.073
CCDC9	0.0124681	290.829	Upregulated	0.0258363	1254.36	0.0244503	-8.71487	0.384068	498.892
PRDX2	0.0124821	155.529	Upregulated	0.0335928	-48.2062	0.108153	371.493	0.046158	609.698
GANAB	0.0124892	247.971	Upregulated	-0.0472201	-100.831	-0.0183767	-280.923	0.773452	1868.87
LOC338579	0.0124892	0.418881	Upregulated		0.724354	0.113409
POLE4	0.0124892	85.8719	Upregulated	-0.0378499	145.398	0.0701261	-15.377	-0.0688929	385.247
SNORA16B	0.0124892	42.0021	Upregulated		204.506	0.0635767	6.88382	-0.192327	-1.25092
IFNGR2	0.0125355	101.723	Upregulated	0.115682	361.696	-0.0252213	254.36	0.0850972	-5.8956
CD48	0.0125651	265.797	Upregulated	-0.10327	269.111	0.145603	-11.7681	0.178308	1337.22
DGAT1	0.0125651	189.171	Upregulated	0.117843	100.572	-0.0688254	33.7032	-0.0244542	1000.73
ZDHHC19	0.0125722	7.79002	Upregulated	0.155487	-2.77009	0.00890442	5.73161		35.8242
PTPN12	0.0125859	331.561	Upregulated	0.0625265	1330.24	-0.0196581	327.282	0.243916
C3orf62	0.012623	67.8682	Upregulated	0.0467813	18.5931	0.0216125	203.445	0.0437493	185.059
AGPAT1	0.0126301	33.1794	Upregulated	0.0241416	82.4524	-0.0816375	21.4186	0.183846	95.0788
BLVRA	0.0126584	498.507	Upregulated	0.0653947	2446.66	0.0489401	-59.4455	0.0351876	603.672
SLC26A8	0.0126693	29.6229	Upregulated	0.31029	13.2216	0.123588	52.5581	-0.240069	111.764
NBR1	0.0126726	76.2442	Upregulated	0.031111	566.325	0.129031	186.092	0.0363327	-295.148
MAPK14	0.0127007	245.392	Upregulated	0.143069	192.262	0.0206513	813.717	0.214608	465.993
TTC38	0.0127652	80.2376	Upregulated	0.0223149	100.599	0.0550073	-71.3212	0.390578	451.679
TADA3	0.0127723	530.818	Upregulated	0.042486	1915.27	-0.0755786	49.4718	0.291738	1219.91
SLC40A1	0.0127756	85.4539	Upregulated	0.117858	570.889	-0.109312	469.687	-0.181147	-527.679
RHBDL2	0.0127942	0.754961	Upregulated	0.0637419	0.564646	-0.012697	0.0821918		3.07692
POLR2J	0.0128026	90.4476	Upregulated	0.00650467	13.6766	0.0729974	35.4597	0.277477	493.192
KIAA0232	0.0128687	105.688	Upregulated	0.0967171	331.161	-0.0125644	636.53	-0.304039	-333.341
DCDC2B	0.0128796	2.83421	Upregulated	0.0561112	1.24454	0.00282332	0.492136		12.3755
HEXB	0.0129325	115.005	Upregulated	0.037934	250.194	0.0716984	-23.2182	0.225583	462.72
ASAH1	0.0129435	940.815	Upregulated	0.0735509	3870.2	-0.00486066	613.958	-0.121812	1160.78
MARVELD1	0.0129623	122.281	Upregulated	0.110364	508.226	-0.0319143	3.87062	0.0679281	221.441
COQ2	0.0129807	13.3745	Upregulated	0.0816985	6.72347	0.0904449	16.3146	-0.514642	57.5513
PRR13	0.0129952	1674.81	Upregulated	0.0662866	8360.9	-0.00409409	214.236	0.0224947	1473.64
ABHD3	0.0130282	46.8112	Upregulated	0.236172	115.68	0.0694794	228.617	-0.174644	-63.5604
SNAPC4	0.0130386	44.088	Upregulated	0.0458834	75.6292	0.0349053	-18.8407	0.0432078	207.615
ECHDC3	0.0130389	18.2139	Upregulated	0.257823	25.0274	-0.070742	16.0411	-0.208162	68.2363
CEACAM6	0.0130746	12.6578	Upregulated	0.536711	4.97323	0.0213956	9.6758	-0.0952318	60.8352
MPP1	0.0130746	433.803	Upregulated	0.181158	1215.1	0.0774897	845.013	-0.000416399	542.451
SAMM50	0.0130816	59.3599	Upregulated	0.0348419	-9.11638	0.058678	-55.3511	0.456133	420.077
KCNJ2	0.013094	260.571	Upregulated	0.127279	1290.21	0.0285602	729.303	-0.215844	-456.029
MFAP3	0.0130968	4.63917	Upregulated	0.045392	16.3869	0.0163106	60.345	0.176916	-49.1355
BRCA1	0.0131405	3.46983	Upregulated	0.0489831	12.1391	0.018627	45.7128	0.119219	-37.2198
EHD1	0.0131781	827.409	Upregulated	0.0421156	2931.42	-0.000220897	507.918	0.431392	1524.64
MED18	0.013221	31.9239	Upregulated	-0.0149497	19.3852	0.0612343	11.1918	0.0337632	160.886
CEP170	0.0132535	10.5347	Upregulated	0.109081	24.2345	0.064036	47.4592	0.178426	-8.837
BRAT1	0.0132643	270.222	Upregulated	0.0611055	732.114	-0.0152943	25.7626	0.293277	863.115
CST7	0.0133019	362.704	Upregulated	0.072614	180.065	-0.159351	371.11	0.406645	1624.73
FZR1	0.0133388	104.058	Upregulated	0.0640325	34.0299	-0.0528661	67.4587	0.209639	522.637
ACTR2	0.0133804	4.66054	Upregulated	-0.0309887	1051.37	0.0466991	313.001	-0.0493487	-1336.38
RN5S156	0.0133804	0.157638	Upregulated			0.157638
WASH3P	0.0133804	54.3031	Upregulated	-0.00477521	15.6644	-0.101985	47.7976	-0.21769	262.681
CXCL1	0.0134366	64.5592	Upregulated	0.135537	350.906	0.0566522	51.929	-0.302646	-15.37
NAPA	0.0134872	260.237	Upregulated	0.0733587	-46.4322	0.0317909	484.789	0.291327	1122.67
RANGAP1	0.0134944	200.1	Upregulated	-0.0297297	-149.545	0.0786935	-94.6905	0.677295	1444.11
NDRG3	0.013503	39.0419	Upregulated	0.0231045	17.4803	0.0848821	6.03146	0.364549	210.267
CHPF2	0.0135086	104.886	Upregulated	0.0839443	1.5979	0.0604181	77.6509	0.230073	549.694
ASGR1	0.0135135	94.2451	Upregulated	0.114861	300.304	-0.0156546	-3.95687	0.0628231	268.962
CD300LF	0.013517	171.099	Upregulated	0.0598466	168.456	0.184214	97.8661	-0.0691912	760.097
UBE2A	0.0135906	99.8207	Upregulated	0.0515504	296.969	0.0952661	35.2445	-0.0572937	266.621
ZNF516	0.01361	157.339	Upregulated	0.120465	264.102	-0.0671692	724.237	-0.351814	-44.0092
CMKLR1	0.0136143	89.195	Upregulated	0.0231213	255.727	0.0219547	-12.6722	0.341835	291.729
YWHAZ	0.0136144	615.103	Upregulated	0.0146651	299.699	0.0255935	481.546	0.369403	2908.96
DHRS12	0.0136293	37.8772	Upregulated	0.108915	67.4677	0.0618358	120.145	0.0417206	39.4377
FKBP9	0.0136293	9.96882	Upregulated	0.262116	28.416	-0.0288354	16.0056	0.0371644	15.1209
TOX2	0.0136443	9.71969	Upregulated	0.0499113	50.9799	0.0202199	-16.2364	0.0412007	23.4634
TPST1	0.0136534	105.887	Upregulated	0.343765	301.414	-0.0968429	106.189	-0.35094	227.824
RHOB	0.0136681	182.967	Upregulated	0.0388816	149.757	-0.0486126	632.499	-0.125136	315.679
AKNA	0.013697	1089.9	Upregulated	0.0145275	-21.4728	0.030341	663.833	0.154933	5896.83
TRABD	0.0137041	191.636	Upregulated	0.0397375	1.00987	0.00102563	31.5155	0.110918	1117.14
VPS35	0.0137264	89.5135	Upregulated	-0.0397802	221.62	0.147707	-206.781	0.539086	521.595
ANXA11	0.0137346	1082.58	Upregulated	0.0319846	501.287	-0.0124311	580.609	0.0151541	5413.53
IP6K1	0.0137423	516.063	Upregulated	0.099743	2127.53	-0.0118839	201.773	0.133164	766.855
DUSP3	0.0138134	60.7389	Upregulated	0.0956918	44.9293	0.145349	-108.754	0.00593037	428.011
RAP1GAP2	0.0138409	70.9972	Upregulated	0.0392895	9.36666	0.10398	192.562	0.352267	223.559
RNPEP	0.0138561	312.797	Upregulated	0.0495824	696.189	-0.00157434	189.165	0.21795	991.161
RNF31	0.0138637	54.0879	Upregulated	0.0400827	-59.9247	0.0481329	33.8666	0.11271	350.385
STEAP4	0.0138826	89.8259	Upregulated	0.12658	282.807	0.0401308	2203.81	-0.401003	-1947.43
HSP90AA1	0.0139015	619.871	Upregulated	-0.11384	691.549	0.0570801	-214.93	0.218381	3242.44
RPS6KB2	0.0139022	258.681	Upregulated	0.0669263	735.658	-0.00538292	25.6251	-0.358583	791.097
PRSS58	0.0139171	0.2582	Upregulated	0.017657	0.993693	0.0306389	0.0273973		0.221612
EIF1B	0.0139205	73.8912	Upregulated	0.0957963	377.084	0.0391037	-5.16185	0.268092	71.022
CSAD	0.0139462	17.1023	Upregulated	0.0591858	32.7769	0.115128	84.9097	-0.278226	-14.9689
NEDD1	0.0139475	47.347	Upregulated	0.0150505	208.031	0.104364	1.90462	0.210706	73.8168
SLC30A1	0.0139589	37.0066	Upregulated	0.0754055	49.466	0.0032665	48.5789	0.289517	123.626
TNFAIP8L2	0.0139611	420.713	Upregulated	-0.0434843	696.232		74.171	0.0784331	1333.13
ICAM3	0.0139706	1831.02	Upregulated	0.0633428	7384.92	-0.160851	1769.81	0.0270017	1831.49
SUCLG1	0.0139799	75.5126	Upregulated	0.00314792	75.5488	0.0672316	-29.0416	0.727161	405.771
TNFRSF14	0.014028	191.902	Upregulated	0.00236314	694.374	-0.0422015	327.606	-0.352458	129.822
MSN	0.0140473	824.793	Upregulated	0.0382128	1017.55	0.131013	1129.47	0.364889	2801.21
ARVCF	0.0140811	24.0185	Upregulated	0.0439865	10.9088	-0.00230846	14.9975		94.1447
SNRNP35	0.014109	37.2381	Upregulated	0.0237315	22.1892	0.0188042	-38.7083	0.134196	239.771
LILRB4	0.0141399	28.7814	Upregulated	0.044563	177.092	0.185195	-6.16844	0.0256472	1.50916
NCOR2	0.0142018	193.055	Upregulated	0.0189976	732.672	0.0256931	-394.139	0.621792	819.13
HLA-A	0.0142251	2752.21	Upregulated	0.0137296	3993.07	-0.0102002	1007.65	0.0206844	11512.5
EFNB2	0.014264	2.7817	Upregulated	0.041298	4.51555	0.0157741	1.06849		8.2674
FZD2	0.0142715	23.1424	Upregulated	0.0482218	35.3948	-0.0516251	-24.0908	0.00999164	127.544
GRAMD1A-AS1	0.0142715	1.18348	Upregulated				1.72045		0.64652
MIR4263	0.0142715	0.176665	Upregulated			0.120393	0.645865		-0.236264
MRPS36	0.0142715	162.597	Upregulated		487.937	0.0496387		-0.196839
OLFM4	0.0142715	54.7823	Upregulated	1.02551	83.4094	-0.0630651	135.258	-0.426729	109.491
POLR3D	0.0142715	4.89762	Upregulated	-0.0513713	-18.4603	-0.00604609	-38.4155	0.870282	85.4487
SERPINB6	0.0143079	282.846	Upregulated	-0.0180571	129.49	0.0736377	21.9356	0.268851	1545.32
XRN1	0.0143281	153.152	Upregulated	0.0214106	78.6279	0.127101	164.466	0.374201	675.295
NEDD9	0.0143308	25.5421	Upregulated	0.0450921	13.5098	0.168787	739.167	-0.405935	-599.233
VTA1	0.014334	21.0464	Upregulated	0.0116148	9.51788	0.0187128	6.7311	0.55776	109.441
BSG	0.0143341	1509.42	Upregulated	0.0478645	-134.454	0.0754209	5559.5	0.0322804	3631.29
PHF21A	0.0143341	7.12212	Upregulated	0.0579104	34.1993	0.102645	200.541	0.245966	-192.414
SUFU	0.0143379	34.7395	Upregulated	0.0574723	-2.56385	0.0887178	-68.4896	0.47444	278.87
SF3A1	0.0144158	181.75	Upregulated	0.0259108	250.719	0.0715403	45.8716	0.308038	793.502
LRRC57	0.0144203	13.5499	Upregulated	0.0512132	17.2712	0.0170023	12.7341	0.105126	51.1209
SLC25A3	0.0144683	744.763	Upregulated	-0.00742535	2390.18	0.101652	-48.0041	0.157551	2126.15
PITPNM1	0.0144746	255.229	Upregulated	0.108179	0.67918	0.0480575	46.5277	0.665626	1483.35
SMU1	0.0144798	100.22	Upregulated	-0.0254699	31.6891	0.0990928	-76.9427	0.505448	645.996
TMLHE	0.0144798	5.7356	Upregulated	0.0764433	13.5944	0.0581972	10.376	0.00643776	10.3022
MIR3681HG	0.0145168	0.229336	Upregulated	0.0739305			-0.450025		1.0641
SUCNR1	0.0145168	2.25932	Upregulated	0.221139	-3.72758	-0.0158248	7.90309		6.91575
GABARAP	0.0145187	489.501	Upregulated	0.0528105	2815.26	-0.0121979	111.68	0.0223402	10.0018
EPSTI1	0.0146493	351.804	Upregulated	0.153136	95.2189	0.300928	-175.762	0.114185	2190.8
SLC1A7	0.0146763	29.6725	Upregulated	0.0671119	185.541	0.0644675	-3.13445	0.346941	-4.84982
P4HB	0.0146811	320.409	Upregulated	0.0810863	523.449	0.0212116	-332.868	0.0243605	1731.75
GSR	0.0148162	55.3122	Upregulated	0.0687339	119.503	0.0829571	42.2268	0.298196	169.694
TPD52L2	0.0148249	309.196	Upregulated	0.0440086	81.6638	-0.0858991	381.477	0.0869105	1391.99
NAIP	0.0148472	33.0472	Upregulated	0.162601	133.468	0.237218	17.6357	-0.0442679	46.8242
UBALD1	0.0148472	216.87	Upregulated	0.0895017			95.1796		555.341
NLRX1	0.0148513	173.498	Upregulated	0.110941	629.052	-0.0668741	61.5652	-0.15423	350.48
GPR27	0.0148845	1.43248	Upregulated	0.122007	11.1177	-0.167755	163.712	0.0437208	-166.233
NUCB1	0.0148972	493.058	Upregulated	0.0895372	-14.384	0.0369291	211.538	0.16766	2760.9
CCPG1	0.014905	49.8726	Upregulated	0.133903	73.2034		143.535	-0.496346	32.9872
OXER1	0.014905	285.447	Upregulated	0.115739	1176.05	-0.110626	26.9909	-0.214081	509.846
NCF2	0.0149255	2731.95	Upregulated	0.0584371	6594.19	0.00783327	2242.96	-0.148391	7554.66
ALDOA	0.014986	2704.46	Upregulated	0.107307	1791.65	-0.0585292	504.531	0.0201873	13930.5
GPX3	0.0150103	17.6868	Upregulated	0.0304625	-5.0644	0.0115866	15.2268	0.266341	95.6502
CRISP3	0.0150137	25.3941	Upregulated	0.545505	0.41175	0.0890409	55.4389		70.4853
PPARG	0.015016	2.4775	Upregulated	0.0345797	5.40276	-0.00796433	2.09183		4.8663
TFPI	0.015049	4.1415	Upregulated	0.100904	-0.677302	-0.0500685	22.2171	0.503754	2.75458
ATOX1	0.0150752	66.1201	Upregulated	0.0070848	133.938	0.0535226	-32.6971	0.274379	295.145
TRIM5	0.0150833	106.925	Upregulated	0.0298127	16.8795	0.1582	-70.1258	0.389286	694.218
MBD1	0.0150903	76.2125	Upregulated	-0.000584635	47.7069	0.157171	-19.345	0.238232	428.518
OR1Q1	0.0151316	0.583369	Upregulated	0.0091638	0.263628	0.0316192	1.18569		1.42674
SLC14A2	0.0151403	0.718251	Upregulated	0.0166452	1.46596	0.0500855	-0.531202	0.308017	3
IL1R2	0.0151523	230.053	Upregulated	0.189867	482.167	0.0316987	318.93	-0.294453	579.293
D2HGDH	0.0151626	64.8175	Upregulated	0.00314122	-300.753	-0.0371376	-31.9518	-0.204686	721.848
DAZAP1	0.0151626	191.139	Upregulated	-0.0165138	32.7274	-0.0157423	-174.339	0.893856	1287.58
FOXN2	0.0151626	134.857	Upregulated	-0.0406136	671.143	0.0165847	72.1969	0.131378	65.696
COX5A	0.0151647	206.055	Upregulated	0.0533126	743.035	0.0286211	-28.5738	0.0709159	521.716
MALL	0.0151811	0.280075	Upregulated	0.118867	0.849804	0.0595648	0.342466	0.0606638	0.249084
TRIM69	0.015182	13.7328	Upregulated	-0.00226163	-40.2699	0.0651696	94.6048	0.193439	27.8059
B3GNT2	0.015194	16.226	Upregulated	0.0737689	13.5162	-0.0772002	67.3044	0.312775
CNOT8	0.0151974	59.695	Upregulated	0.0310654	52.288	0.0445641	72.5408	0.168161	233.097
LMO2	0.0152056	641.434	Upregulated	0.0827301	3002.24	-0.0296021	72.1649	0.103479	774.038
ABTB1	0.0152178	3109.17	Upregulated	0.0785918	7262.29	-0.0555219	2464.27	-0.644837	8929.08
PTPRF	0.0152383	3.08051	Upregulated	0.0959002	-1.51678	0.0144463	11.6012	0.0318357	8.25641
PIGS	0.0153494	223.615	Upregulated	0.0386881	725.695	-0.0129326	-11.9827	0.405538	627.546
AIG1	0.0153814	10.2468	Upregulated	-0.0303933	38.0927	-0.0108233	34.1583	0.307521	-11.0366
PPP1R12A	0.0153974	74.0229	Upregulated	0.0758025	279.013	0.00550645	506.166	0.191954	-341.315
BMX	0.0154023	32.4062	Upregulated	0.189624	126.791	0.00727016	59.8513	0.206379	7.39194
ST3GAL6	0.0154232	40.6061	Upregulated	0.174399	153.465	0.00098527	84.0695	-0.187413	6.11355
MEGF9	0.0154442	514.899	Upregulated	0.122758	830.902	-0.0615219	3239.53	-0.101311	-981.002
RFFL	0.0154862	145.404	Upregulated	0.0259671	519.155	0.0432185	326.383	-0.386087	27.2015
CNBP	0.0155223	297.692	Upregulated	0.00245476	658.421	0.0255308	46.1025	0.0512574	1081.55
E2F3	0.0155355	49.0465	Upregulated	0.0303485	340.232	0.0248634	192.534	0.0924162	-238.636
GCA	0.0155493	2760.3	Upregulated	0.0906765	14474.2	-0.0441885	1616.21	-0.260676	471.582
ATP6V0C	0.0155704	1835.46	Upregulated	0.148988	11004.6	-0.0574233	0.00862506	0.30378	7.75641
GLT1D1	0.0155915	565.442	Upregulated	0.129806	1655.89	0.0753019	801.319	-0.438624	935.676
PPM1D	0.0155973	39.623	Upregulated	0.0662941	74.1418	0.0052222	65.2988	0.088582	98.1374
GPR108	0.0156105	207.391	Upregulated	0.0951912	54.823	-0.0241779	100.548	0.0766049	1088.83
FSTL1	0.0156126	3.22842	Upregulated	0.044317	-26.2009	-0.0434306	51.8874	0.479807	-6.7967
PLXNA2	0.0156888	15.3466	Upregulated	0.0768886	-0.859302	0.00320568	72.4094		5.10256
EBPL	0.015711	28.9512	Upregulated	0.0309353	88.9785	0.0747019	-1.77169	0.0266914	86.3681
ZNF581	0.0157184	74.0032	Upregulated	-0.0228779	-27.026	0.117704	-9.07154	0.415786	479.606
ZFP106	0.0157396	183.719	Upregulated		550.647	0.255655		0.253756
TM6SF1	0.0158203	24.9888	Upregulated	0.231619	60.2195	0.0764805	122.889	0.0216311	-33.5055
TMEM234	0.0158203	29.0249	Upregulated	0.0212301	34.2267	-0.0387575	11.827	0.131337	127.982
PPCDC	0.0158367	127.448	Upregulated	0.0162533	0.047515	0.0370679	141.578	0.0284749	622.982
PACSIN2	0.015847	96.8132	Upregulated	0.0565608	130.027	0.0944237	354.008	-0.119999
WNT6	0.0158839	3.60389	Upregulated	0.0467715	15.1924	-0.120257	-0.0958904	0.266955	6.33333
NUBP1	0.0158879	36.2069	Upregulated	0.0284519	109.994	0.110884	-29.8716	0.0381465	136.941
TRAPPC9	0.0159314	46.6209	Upregulated	0.0183399	-48.1017	0.109684	-70.6885	0.347193	398.04
ANTXR2	0.0159813	74.7217	Upregulated	0.0384584	638.527	0.0285695	181.135	0.223033	-371.623
CORO2A	0.0159949	6.40055	Upregulated	0.12453	27.7866	0.13766	-29.0634	0.419774	38.9982
STRAP	0.0159957	83.6107	Upregulated	-0.0526257	396.574	0.172077	-85.0198	0.360771	189.63
NCOA2	0.0160068	20.6778	Upregulated	0.0277732	5.03037	0.038513	508.36	0.0496823	-389.44
CHST13	0.0160316	53.3941	Upregulated	0.180371	69.3736	-0.0749717	4.13343	0.0819859	246.67
HPR	0.0160535	3.2703	Upregulated	0.204706	19.3651	0.0379412	0.129883	-0.282462	0.166667
PI3	0.0160535	358.07	Upregulated	0.272788	1393.43	-0.170376	470.963	-0.241604	284.161
PLOD3	0.0160535	40.9555	Upregulated	0.0980178	-55.0275	-0.00509425	-50.3009	0.853296	350.115
RNF130	0.0160891	609.889	Upregulated	0.100759	1997.07	0.00486138	350.87	-0.103225	1311.39
EIF2AK1	0.0161177	330.913	Upregulated	0.109413	-86.8609	0.100845	1300.43	0.0249054	771.667
TPST2	0.0161263	201.997	Upregulated	0.0209843	408.795	-0.0369689	101.075	0.328037	701.802
USP25	0.0161434	60.6197	Upregulated	0.0359059	31.0472	0.0635085	33.8118	0.298275	298.462
SNRPC	0.0161894	75.7933	Upregulated	-0.0118792	7.65581	0.0717469	-34.7372	0.27242	481.509
TMEM91	0.016231	121.09	Upregulated	0.0814753	206.794	-0.171105	70.7504	-0.444222	449.529
DPYD	0.0162724	135.389	Upregulated	0.0453356	126.303	0.111476	246.79	0.207461	438.877
PKD1	0.016281	85.2891	Upregulated	0.0542207	64.9646	-0.0174797	-128.994	0.146326	575.581
PLBD1	0.0162896	1390.22	Upregulated	0.230035	5174.6	0.0184606	560.218	-0.120599	2606.39
CRTC2	0.0163328	367.259	Upregulated	0.0456965	901.072	-0.00309827	84.759	0.147499	1217.53
NPEPL1	0.0163629	164.529	Upregulated	0.0447333	434.51		45.414	-0.535954	343.214
MYO9B	0.0164021	558.401	Upregulated	0.0656632	264.209	0.0722456	401.354	-0.0180573	2684.73
SLC12A6	0.0164195	137.172	Upregulated	0.0984462	360.772	0.0343135	1100	0.0161453	-637.892
SYNJ1	0.0164282	0.221223	Upregulated	0.0253315	7.68033	0.026499	115.959	0.0222139	-122.386
PDCL	0.0164501	8.6076	Upregulated	0.0736523	6.4446	0.0734607	-17.3607	0.330385	62.0842
CAPN5	0.0164543	21.0785	Upregulated	0.0402803	20.5402	-0.0523697	32.343	0.0287967	73.5714
PPP2R5A	0.0164938	333.956	Upregulated	0.0568642	277.24	-0.0988671	766.635	-0.118752	960.02
LAGE3	0.0165157	9.52536	Upregulated	-0.0162453	-148.77	0.0611572	1.8072	0.566052	203.504
TMEM107	0.0165327	74.5706	Upregulated	0.0518402	377.458	-0.0378042	-6.45003	0.33336	76.0678
CEACAM8	0.0166034	53.4774	Upregulated	0.768757	39.1827	0.18984	134.396	-0.209697	146.537
HIF1A	0.0166215	57.9971	Upregulated	0.0520091	67.9815	0.0717041	100.886	0.130425	178.861
STAU1	0.0166473	28.7748	Upregulated	0.081769	79.2698	0.145935	-82.6494	0.428735	175.372
ACSF2	0.0166693	34.8756	Upregulated	0.0131857	1.37695	0.0546247	-47.6256	0.464	254.971
CSTA	0.0166728	239.084	Upregulated	0.175819	1102.11	0.0759502	23.3313	-0.208274	309.016
LTBR	0.0166728	197.559	Upregulated	0.065065	109.118	-0.054883	110.233	0.0215467	965.971
CMPK2	0.0166816	340.029	Upregulated	0.299328	274.155	0.0823188	-238.109	0.0929684	2003.65
TEX2	0.0166987	11.3187	Upregulated	0.0499312	4.60325	0.0743002	3.48453	0.582906	59.1172
ZNF385A	0.0167134	279.636	Upregulated	0.137387	-147.53	0.111439	-122.817	0.145593	1947.77
EMP3	0.0167281	709.998	Upregulated	-0.0471401	-868.798	0.0527824	-166.93	0.488024	5295.22
MGAM	0.0167281	286.105	Upregulated	0.133312	341.299	-0.0130404	1724.93	-0.00620521	-349.714
DCLK2	0.0167576	2.88837	Upregulated	0.00920207	3.83031	0.0500743	-6.83968		17.3919
NANOS3	0.0167609	1.6346	Upregulated	0.100122	6.74427	-0.0159847	0.638255	0.0277835	2.31319
PLAC8	0.0167617	267.984	Upregulated	-0.0542916	338.455	0.0407172	-237.783	0.595524	1506.65
PDK4	0.0167874	85.112	Upregulated	-0.166401	95.6385	0.0375683	54.3724	0.0480658	360.742
CDS2	0.0168183	157.451	Upregulated	0.0402625	150.671	0.000681338	271.011	0.0958412	522.885
COMT	0.0168404	86.5026	Upregulated	0.0667372	105.291	0.0114019	-20.4292	0.161165	433.914
YIPF4	0.0168514	74.1717	Upregulated	0.0831557	48.8151	0.0623872	239.806	-0.0311404	156.295
AHRR	0.0169443	1.79326	Upregulated		1.27202	0.0613194	11.3562		-5.51648
FOLR2	0.0169443	25.8457	Upregulated	0.105341	38.5286	-0.0375194	-4.31811	0.0669172	120.729
GPR107	0.0169521	66.0689	Upregulated	0.0209134	127.775	0.110536	7.02131	0.408486	261.077
CARHSP1	0.01698	100.436	Upregulated	0.0362428	133.463	-0.0728732	45.3521	0.0122933	423.826
ITGB2	0.0170059	3410.8	Upregulated	0.0951589	4743.11	-0.023505	158.179	0.303645	15563.2
F5	0.017024	1.51288	Upregulated	0.210333	90.918	0.17046	210.843	-0.128847	-292.936
MMRN1	0.0170576	14.3798	Upregulated	0.110233	16.4473	-0.147882	75.5226	0.460307	-6.11355
SHB	0.017091	1.94975	Upregulated	0.060931	1.62117	0.00410458	2.24201	-0.29197	8.06227
ABHD2	0.0171078	295.523	Upregulated	0.0606097	107.3	0.078886	1796.24	0.0126738	-130.551
MYO7A	0.0171614	9.6034	Upregulated	0.0600932	15.472	-0.0140917	-10.2598	0.213823	52.1484
LY96	0.0171807	397.389	Upregulated	0.0624564	2252.92	0.0918028	55.1527	-0.213333	76.326
ARID3A	0.0172031	185.412	Upregulated	0.0972176	574.372	-0.0599591	254.549	-0.104249	283.615
FBP1	0.0172598	128.839	Upregulated	0.0771858	406.17	0.131409	-50.2217	-0.176177	417.053
ACAA1	0.0172931	346.925	Upregulated	0.0491364	760.513	-0.000370289	168.167	-0.226564	1153.05
RC3H1	0.017331	85.1361	Upregulated	0.062728	115	0.14443	423.791	-0.0639824	-28.1172
SF3B2	0.0173421	394.463	Upregulated	0.0238843	90.5817	0.037143	-138.81	0.509394	2414.44
DAP3	0.0173703	182.855	Upregulated	-0.0340116	481.331	0.058345	-28.2978	0.12671	643.945
PRPF19	0.0173784	248.095	Upregulated	0.0369665	415.552	0.0214767	-121.487	0.373304	1194.07
BEX1	0.0173966	2.57068	Upregulated	0.093623	11.9419	0.100256	-1.2826	-0.357692	4.92857
FGD4	0.0174056	61.1733	Upregulated	0.195943	216.76	0.0514571	110.751	0.0618726	39.2198
CXCR4	0.0174061	1352.91	Upregulated	0.0964524	4778.25	-0.0981358	1023.39	0.068553	2315.75
DPP3	0.0174388	33.457	Upregulated	0.00789372	0.27047	0.107428	-25.0066	0.527472	224.835
SP1	0.0174602	188.055	Upregulated	0.0165615	158.605	0.0205657	461.366	0.241163	508.081
PROK2	0.0174623	677.316	Upregulated	0.0934212	4598.52	0.00428702	807.13	0.170834	-1342.02
SLC5A9	0.0174623	15.9633	Upregulated	0.142084	34.6072	-0.0470608	5.17859		39.9359
DUSP6	0.0175029	800.758	Upregulated	0.0130197	3505.81	0.0292016	460.509	0.133787	838.055
PYGB	0.0175423	98.1267	Upregulated	0.0362565	-79.2599	0.0213301	108.717	0.610085	558.636
CCDC15	0.0175515	3.48557	Upregulated	0.092073	3.852	0.0580294	25.8762	0.223761	-9.18864
PSMC3	0.0175586	109.813	Upregulated	0.0338776	38.4114	0.00571101	-50.0974	0.550292	669.973
KDM4B	0.0175943	384.74	Upregulated	0.0699396	1317.82	0.0844899	409.842	-0.0881375	580.711
TCP10L	0.0176186	0.489057	Upregulated	-0.00723261	-0.997614	0.0104284	0.87519	0.947344	2.10623
RNF146	0.0176431	18.5393	Upregulated	0.0800838	97.3275	0.0361662	43.2141	0.0119727	-29.4341
TMEM144	0.0176707	6.20846	Upregulated	0.116156	4.94045	0.0311854	-19.0974	0.0223098	51.2381
ROPN1L	0.0177019	80.3466	Upregulated	0.117337	355.155	0.0426995	64.2648	-0.17956	62.6795
ELOVL3	0.0177259	2.44562	Upregulated	0.105168	7.82591	-0.055812	0.554541	0.549774	5.69414
TCIRG1	0.0177259	1532.9	Upregulated	0.0731317	2778	0.0176858	853.442	-0.128647	5566.01
NUP98	0.0177444	82.6492	Upregulated	0.07719	96.1045	0.142278	202.998	0.0747554	196.498
CEBPE	0.0177994	199.499	Upregulated	0.15364	770.779	-0.0104017	-16.6753	-0.377244	443.123
BNIP2	0.017835	164.027	Upregulated	0.0687877	941.022	-0.0262147	174.3	0.131349	-131.335
MIR4295	0.017835	0.451009	Upregulated			0.389371	0.932522		0.0311355
MPDU1-AS1	0.017835	31.5064	Upregulated				1.72349		61.2894
PLOD2	0.017835	1.20663	Upregulated	0.267689	0.34441	-0.0731249	9.75241		-4.25824
RN7SKP130	0.017835	0.265572	Upregulated				1.10807		-0.576923
COX6B1	0.0178739	626.609	Upregulated	0.0444269	1539.86	-0.0377714	60.618	0.0927993	2159.07
KRTAP10-11	0.0178872	1.44438	Upregulated	0.0999899	6.61703	0.0323444	0		0.472527
NLRP6	0.0179315	64.0215	Upregulated	0.10582	9.81214	0.0882592	185.881	-0.705263	188.947
ALDH1A1	0.0179389	112.035	Upregulated	0.0986888	113.773	0.0256549	-31.6281	0.106289	589.832
CASZ1	0.0179409	7.75506	Upregulated	0.050351	6.77697	-0.00107303	29.3024	0.213103	10.1886
CELF2	0.0179575	158.547	Upregulated	0.0333016	22.4823	0.0254375	1491.95	0.0230008	-563.238
CCNI	0.0179668	816.381	Upregulated	0.0157903	875.939	-0.042263	1384.47	0.272897	2637.62
CASP9	0.0180134	15.9813	Upregulated	0.0560752	44.899	0.0338426	10.2344	0.263562	40.4011
GPS2	0.0180321	27.8293	Upregulated	0.0671846	126.028	-0.16469	9.28767	0.184609	31.5733
ZNF446	0.0180788	24.3991	Upregulated	0.039651	78.3838	-0.0192089	12.2968	0.0285426	55.6648
SMARCAL1	0.0180882	41.7484	Upregulated	0.02691	140.811	0.0337136	-88.2664	0.199986	197.685
CBS	0.0182247	46.013	Upregulated	0.163005	247.894	0.0143569	42.623	-0.0319747	-14.5842
NUP50	0.0182856	80.8105	Upregulated	0.0238126	177.774	0.0643269	310.934	0.012521	-3.94505
LRRFIP2	0.018347	30.6486	Upregulated	0.0728933	107.661	0.130554	5.00203	0.246762	70.7784
STAT5A	0.0183518	276.171	Upregulated	0.0309399	33.7502	-0.0160989	100.081	0.191127	1522.99
SLC25A11	0.0183613	157.715	Upregulated	0.015639	58.5261	-0.00145004	37.8569	0.162498	849.733
RAN	0.0183878	244.519	Upregulated	-0.0469424	394.817	0.105377	-83.8042	0.223393	1155.82
NADSYN1	0.0184699	350.147	Upregulated	-0.0173962	69.0963	0.0570647	145.094	-0.019391	1886.67
RNF167	0.0184973	382.85	Upregulated	0.0561331	-74.6951	-0.0504275	114.669	0.322629	2256.79
DOK2	0.0185229	532.342	Upregulated	0.0324506	47.6798	0.0588735	-139.385	0.0842303	3285.58
LDHD	0.0185229	6.19632	Upregulated	0.0309849	17.8075	0.0120445	-4.52055	0.448739	23.3993
USP10	0.0185248	215.508	Upregulated	-0.0971615	538.55	0.233294	227.435	0.143874	526.78
ZNF438	0.0185706	139.945	Upregulated	0.131084	769.015	0.0356447	70.1766	0.0145269	0.298535
INSL3	0.0185802	25.4216	Upregulated	0.0856646	83.5791	-0.0361515	2.58397	0.0187478	66.2985
FHIP2A	0.018593	76.532	Upregulated	0.136008			403.332		-173.872
TNFSF14	0.0186084	133.922	Upregulated	0.105986	740.236	0.0111345	214.631	-0.127167	-151.324
LCOR	0.0186625	38.8169	Upregulated	0.0317048	37.3839	-0.0633823	175.494	0.221841	19.8333
MS4A6A	0.0186901	425.445	Upregulated	0.0338028	346.608	0.128348	-201.957	-0.17701	2408.03
RHBDL1	0.0187048	50.6511	Upregulated	0.0293705	283.951	-0.0302229	2.78894	0.142074	17.0256
C2orf76	0.0187256	15.6114	Upregulated	-0.0623745	66.9025	0.0265776	-2.87418	-0.325757	30.0018
EIF2B5	0.0187256	71.9525	Upregulated	-0.043618	-45.9564	0.0117178	-80.7732	0.718437	557.758
METTL18	0.0187256	0.551088	Upregulated	-0.123801	-19.9354	0.110613	-2.99137	-0.35792	26.6044
VAMP8	0.0187256	830.736	Upregulated	-0.0352032	3548.16	0.115616	-40.6479	-0.110768	1476.93
UBR4	0.0187594	40.6289	Upregulated	0.0373249	266.774	0.10532	-495.65	0.109506	472.397
GALK1	0.0187785	91.8527	Upregulated	0.119945	6.75157	-0.0532648	5.8001	-0.36856	538.866
CLEC3B	0.0188405	48.3054	Upregulated	0.17733	288.827	0.000621153	-1.04059	0.124988	1.74359
ARFGAP2	0.0188426	303.515	Upregulated	0.00424962	335.83	0.0403504	-47.4734	0.37719	1532.31
PPM1B	0.018888	15.669	Upregulated	0.13422	92.9889	0.0231556	79.2542	0.0951357	-78.4817
ANKRD37	0.0189123	4.8554	Upregulated	-0.00482723	24.6711	0.0346778	-6.56164	0.210981	10.7821
CORO7	0.0189268	113.67	Upregulated	0.0720616	545.725		20.9401	0.102361	1.51099
CTBP2	0.0189462	243.207	Upregulated	0.0259439	1249.76	0.0585437	176.766	0.00667255	32.6264
VASP	0.0189649	1554.2	Upregulated	0.0592028	3096.66	-0.0335269	2055.75	0.0798901	4172.7
DNAJB6	0.0189681	184.638	Upregulated	0.0306816	214.434	-0.0441526	197.994	0.151633	695.26
TGM3	0.0190365	21.5636	Upregulated	0.209677	54.127	-0.0689591	44.6657	-0.333717	30.7821
RAB21	0.0190435	63.5541	Upregulated	0.0230627	204.365	0.0607974	104.785	0.104028	71.9872
FAM199X	0.0191313	24.3929	Upregulated	0.025158	110.35	0.0228625	3.78387	0.237534	31.9377
HNRNPC	0.0191565	153.573	Upregulated	-0.0578538	866.66	0.124766	-99.1908	0.328428
FES	0.0191785	423.424	Upregulated	0.132714	562.758	-0.0327952	134.582	-0.170472	1843.27
GOLM1	0.0192208	25.5557	Upregulated	0.0420577	25.7785	-0.00424256	36.1192	0.248305	91.1502
FAM89B	0.0192981	54.6934	Upregulated	0.059532	202.552	0.0316995	8.6484	-0.0519983	116.921
TMBIM1	0.0193055	273.43	Upregulated	0.100811	168.547	-0.0272464	389.501	0.171897	1082.29
MSL3	0.01938	91.4276	Upregulated	0.0060476	50.5832	0.090016	40.6342	0.625841	456.626
MAP2K1	0.0194047	66.3063	Upregulated	0.102911	75.6498	0.141684	-39.9604	0.321453	361.582
ZNF200	0.0194264	74.6793	Upregulated	0.0589081	286.95	0.0233002	84.7707	0.010825	76.2619
PAQR6	0.0194462	52.1249	Upregulated	0.0331074	204.14	-0.0161903	15.9011	0.0539292	92.6374
CHRM3	0.0194661	2.0674	Upregulated	0.0171635	7.16407	0.0361112	0.663623		2.45604
MKRN1	0.0194951	400.034	Upregulated	0.116795	783.971	0.0774796	2300.98	-0.118421	-684.822
LRMDA	0.0195925	21.5076	Upregulated	0.171768			-6.52258		70.8736
HAPLN2	0.0196161	275.196	Upregulated	0.0837358	1651.38	-0.0604511	-0.0618975	-0.266366	0.104396
KCNE1	0.0196161	14.0285	Upregulated	0.205409	2.00135	0.000743034	25.2831		42.652
MTCH2P3	0.0196161	0.245427	Upregulated				0.699645		-0.208791
SOX1	0.0196161	0.186936	Upregulated	0.0641035	0.74273	0.100378	0.0750888		-0.047619
WASH9P	0.0196161	450.299	Upregulated						450.299
THOC7	0.0196252	59.1379	Upregulated	0.0240282	230.346	0.0446677	-5.21106	0.168021	129.456
MAP4	0.0196558	132.565	Upregulated	-0.0418155	865.456	0.0937105	-299.443	0.390655	228.936
SH3BP2	0.0197046	701.357	Upregulated	0.0485062	2.11346	0.0596996	733.894	-0.0823956	3472.11
SPTB	0.0197251	117.132	Upregulated	0.10063	6.82444	0.0908186	774.179	0.075723	-78.4762
TGOLN2	0.0198341	287.363	Upregulated	0.0388929	973.06	0.0854168	110.32	0.143127	640.529
MED4	0.0198498	28.3835	Upregulated	0.0345009	82.7727	0.0320489	8.16794	0.0921164	79.2015
SIL1	0.0199498	34.4818	Upregulated	0.0354473	43.9661	0.00271576	-29.6134	0.296412	192.203
EPAS1	0.0199737	28.6484	Upregulated	0.109708	112.103	0.0297602	-31.0497	-0.00546364	90.7033
ASPHD2	0.0200376	6.01586	Upregulated	0.0421084	-8.43986	0.118518	-14.5591	0.611158	58.3223
APOBR	0.0200514	877.962	Upregulated	0.0950769	794.128	-0.0501665	-75.8412	0.118171	4549.32
SAC3D1	0.0200596	17.1134	Upregulated	-0.0616437	12.7842	0.0762143	-5.14409	0.315046	94.7106
RAB35	0.0200882	242.154	Upregulated	-0.000661564	498.564	0.019194	58.4434	0.0505273	895.846
GAB2	0.0201289	363.021	Upregulated	0.153742	711.091	0.0257862	913.068	0.0248307	553.762
PADI4	0.0201837	114.027	Upregulated	0.159185	112.636	0.0129986	574.228	-0.299932	-2.57326
PICK1	0.0202583	55.3285	Upregulated	0.0704174	81.2008	0.0510132	-27.9711	-0.563358	279.183
IQSEC1	0.020285	502.694	Upregulated	0.0428665	1964.92	0.0159717	623.953	0.228417	427.007
AKAP13	0.0203582	150.761	Upregulated	-0.0251746	594.348	0.224425	-559.601	0.536623	869.084
SAP130	0.0203947	40.604	Upregulated	0.0212069	196.556	0.100774	36.2892	0.120074	10.5366
GAPDH	0.0204172	1614.72	Upregulated	0.08867	1234.33	-0.0817272	-295.839	0.197899	8749.63
TBC1D25	0.0204461	38.0965	Upregulated	0.0340402	-3.23017	0.00852414	9.9934	0.430643	221.342
LUM	0.0204762	3.78202	Upregulated	0.0574109	18.1373	0.0341754	-1.47083		2.15201
XPO7	0.0204876	204.07	Upregulated	-0.0107492	314.705	0.167185	352.391	0.154111	557.013
DENND2A	0.0204977	0.190085	Upregulated	0.0409437	0.628104	0.0159283	0.207509	0.0612135	0.186813
SCYL1	0.0205057	343.972	Upregulated	0.0503246	962.13	-0.0175381	76.9691	-0.110445	1024.81
CGGBP1	0.0205065	31.2806	Upregulated	-0.0265012	-3.4528	-0.0381239	-26.9447	0.561588	217.584
PTX3	0.0205065	7.27965	Upregulated	0.41845	29.8953	0.0414462	-2.22628	0.191778	15.3571
RBM18	0.0205065	59.964	Upregulated	-0.0569595	215.498	-0.00820234	22.6849	-0.0480746	121.714
SNAI3	0.0205065	83.7036	Upregulated	0.00449182	69.8457	-0.0396556	75.069	-0.40128	357.744
WDR26	0.0205085	151.505	Upregulated	0.0946574	282.864	0.157741	793.533	-0.103121	-167.513
CD300A	0.0205597	576.279	Upregulated	0.040887	848.209	-0.0545415	315.456	0.00590893	2294.01
TFPT	0.0205797	6.1078	Upregulated	-0.0210772	35.8225	0.0546662	-1.16794	0.200358	1.75824
STK16	0.0206538	70.0242	Upregulated	0.059642	36.5026	-0.0697545	57.2106	-0.396404	326.839
CHCHD1	0.0207468	82.6357	Upregulated	-0.022376	265.609	-0.0740261	-1.48554	-0.163678	231.951
LPCAT2	0.0207607	165.865	Upregulated	0.1122	94.7823	0.0107694	498.338	-0.142891	402.09
INO80B	0.0207673	2.5348	Upregulated	0.0360601	-5.3618	0.0327653	11.5322	0.6014	8.36813
INPP5K	0.0207673	203.829	Upregulated	0.0278199	258.145	-0.00728306	180.958	0.00599913	783.842
AP2M1	0.020809	781.432	Upregulated	0.038549	1109.98	-0.054282	553.262	0.279495	3025.08
SLC44A1	0.0208119	14.6186	Upregulated	0.1214	91.7244	0.0248127	-26.5277	0.0500625	22.3187
LOC646214	0.0208176	24.1062	Upregulated	0.0588339	96.0668	0.111145		0.188043
GALNT3	0.0208613	18.8943	Upregulated	0.0466011	61.3245	0.0182858	67.5246	0.330999	-15.8791
B3GNT5	0.0208717	23.0569	Upregulated	0.0193697	106.756	0.0312217	130.411	0.135095	-99.011
RGS3	0.020877	118.572	Upregulated	-0.00914363	197.144	-0.0574963	225.052	0.24878	289.051
PIK3AP1	0.0208924	34.2366	Upregulated	0.0526424	41.4682	0.167235	102.914	0.40151	60.4158
FBXL20	0.0209032	68.0674	Upregulated	0.0268527	218.845	0.181491	72.6454	0.00411333	116.701
RRAGA	0.0209423	140.077	Upregulated	-0.0345105	485.852	-0.0849121	32.0274	0.626033	322.073
MMP9	0.0209892	1261.91	Upregulated	0.335367	5829.24	-0.153041	1228.2	0.180237	513.665
TMUB2	0.0210731	156.3	Upregulated	0.0754183	51.5533	-0.0645522	132.277	-0.0960586	754.053
ANKMY1	0.0210818	1.45778	Upregulated	0.010662	32.0619	0.0311914	-174.103	0.139707	150.606
MUL1	0.021124	56.7399	Upregulated	0.0500408	21.7869	-0.0471492	12.5515	0.61262	305.485
LMAN2	0.0211681	332.192	Upregulated	0.00488352	337.781	-0.0411715	28.4023	0.237971	1626.77
TYMP	0.0211783	3776.44	Upregulated	0.0727952	9752.01		174.11	0.178892	8955.81
RRAD	0.0212043	1.96633	Upregulated	0.0490214	-0.815135	-0.0580595	1.39574		9.26007
KREMEN2	0.0212194	0.330538	Upregulated	0.0705659	-2.59356	-0.106946	-0.793506	0.463453	4.94322
SNRPB	0.02127	201.946	Upregulated	0.00724878	-214.914	0.00119397	-60.4272	0.578505	1486.43
ST3GAL2	0.02127	182.21	Upregulated	0.0895051	36.9319	-0.0022323	452.153	-0.178074	604.267
BAZ1A	0.0212936	69.6535	Upregulated	0.0576636	153.83	0.0870053	311.085	0.00286127	-47.141
SSH1	0.0212995	54.1556	Upregulated	0.0428165	55.0579	0.0160806	143.463	0.144747	126.209
CDA	0.0213361	484.696	Upregulated	0.115509	719.126	-0.0914387	306.098	0.00442793	1882.92
TSPAN4	0.0213967	47.7006	Upregulated	0.162328	55.0992	-0.00176459	-15.5089	-0.433485	246.886
UQCRBP1	0.0213967	30.2718	Upregulated		150.437	0.164976	-0.0989346	-0.188114	1.04396
EFNA3	0.0214018	3.7845	Upregulated	0.100441	-0.968356	-0.0204275	-0.784373		20.5952
TMEM45B	0.0214018	29.5875	Upregulated	0.196416	107.566	-0.0548753	70.5332	-0.197082	-0.518315
ZC3HAV1	0.0214678	305.659	Upregulated	0.0730019	15.8112	0.129328	-108.935	0.305539	1926.57
HIPK1	0.0215128	17.4698	Upregulated	0.0513469	454.105	0.0800996	37.3196	0.21544	-386.952
GFI1B	0.0215339	52.1643	Upregulated	0.154263	-13.4035	-0.153902	7.27042	-0.152705	319.271
MCMBP	0.0215391	95.2963	Upregulated	0.0519325	406.541	0.01467	81.6403	0.132913	83.3974
DBI	0.0215547	362.303	Upregulated	-0.0958556	1809.54	0.0713628	-5.06342	-0.00749259	369.377
GSTO1	0.0215605	155.986	Upregulated	0.0192266	313.055	0.0162377	-30.6043	0.294924	653.136
SERAC1	0.0216357	10.2528	Upregulated	0.0574583	2.27494	0.046735	-8.81076	0.0544195	67.8938
PGAM1	0.0216465	222.349	Upregulated	0.0567102	400.382	-0.00749151	15.9893	0.239659	917.434
SORL1	0.021668	2672.21	Upregulated	0.0128537	14834.3	0.101067	7345.99	0.0302062	-6147.14
MOBP	0.0217868	0.324204	Upregulated	0.0113811	0.537429	0.0350205	0.315576		0.721612
GDAP2	0.021866	5.64528	Upregulated	0.0135472	19.162	0.0836415	-15.896	0.0909202	30.4176
MGLL	0.0218665	23.4038	Upregulated	0.107848	-11.3359	0.0236818	55.7905	0.254531	95.5824
MAPRE1	0.0218933	86.6369	Upregulated	0.0435205	265.916	0.0696055	-85.0112	0.308272	338.495
MPO	0.0218933	39.1916	Upregulated	0.2487	3.66018	-0.198938	61.2268	0.21456	169.998
NDUFA11	0.0219195	112.574	Upregulated	0.0296192	426.605	-0.0166345	-22.4054	0.345875	270.885
ASB7	0.0219713	5.91179	Upregulated	0.0929487	4.92255	0.0727549	50.5084	0.0114806	-20.1374
CTNNBL1	0.0219719	85.6453	Upregulated	-0.0636125	107.41	0.0612558	-84.4744	0.4782	490.46
KBTBD7	0.0219719	35.4397	Upregulated	0.0946301	115.969	-0.0222739	159.045	0.219124	-62.6667
ECE2	0.0219906	11.0164	Upregulated	0.0444461	13.464	-0.0670788	-2.23186	0.209565	54.6795
EXOC6	0.0220258	78.4576	Upregulated	0.103591	371.656	0.0166971	104.154	0.128681	-5.31319
HM13	0.0220507	281.156	Upregulated	0.0416988	-41.2204	0.123666	36.1375	0.0579217	1691.8
SIAH2	0.0220665	24.5097	Upregulated	0.203422	604.355	-0.010931	-435.971	0.14189	-21.6612
VIM	0.0221335	2498.75	Upregulated	0.129281	10967.5	-0.0265007	571.093	0.0398579	3453.77
EFEMP2	0.0221789	18.7821	Upregulated	0.023233	46.1865	-0.00255136	3.52055	0.105917	62.859
NPTN	0.0221825	40.9688	Upregulated	0.117072	80.1922	-0.0368659	204.845	0.0104977	-39.315
SMCHD1	0.0222119	722.733	Upregulated	0.0756401	534.646	0.0137337	4677.53	0.0376309	-875.903
PLA2G4A	0.0222558	6.56898	Upregulated	0.0775223	17.3729	0.142728	-13.0771	0.256873	34.641
CLCN7	0.0222714	103.267	Upregulated	0.0464696	-24.7776	0.0999196	-93.928	0.199774	737.963
SGPL1	0.0222778	76.0949	Upregulated	0.0514563	121.836	0.0202382	-60.6129	0.045649	395.229
BANF1P3	0.0222869	11.6257	Upregulated				0.042618		23.2088
CBX1P3	0.0222869	0.464251	Upregulated				0.87722		0.0512821
ZMAT3	0.0222869	17.8386	Upregulated	-0.0559477	-20.8423	-0.00748093	33.1106	0.839455	93.9872
FCGRT	0.0222882	2158.25	Upregulated	0.0773149	5421.86	-0.0494449	599.683	-0.0959292	6928
LYN	0.0223028	871.392	Upregulated	0.0277706	5693.16	0.0710272	2445.38	-0.0405908	-2910.25
MBOAT2	0.0223028	59.8791	Upregulated	0.167515	27.1184	0.0648018	379.95	-0.224136	-47.8022
B4GALT3	0.0223109	61.1282	Upregulated	0.0182209	-153.021	0.0514422	67.342	0.359896	452.018
STAT2	0.0223351	963.315	Upregulated	0.0692572	67.2834	0.240704	-422.384	0.206364	6134.48
CA4	0.0223412	70.9149	Upregulated	0.162426	276.355	0.00674756	121.247	-0.235677	27.9542
SPR	0.0223412	6.52471	Upregulated	0.0762735	15.0903	-0.0343448	1.51091	-0.0169079	22.522
VSIR	0.0223412	7451.01	Upregulated	0.0745251			3806.9		18546.1
ETV7	0.0224102	87.4998	Upregulated	0.179333	-52.5762	0.077078	18.0244	0.299838	558.995
KCNE3	0.0224208	211.602	Upregulated	0.0758893	600.488	-0.00155264	554.951	-0.0120193	114.11
XYLT1	0.0224213	35.332	Upregulated	0.122419	21.8803	0.0733677	64.515	0.224935	125.176
RAE1	0.0224323	272.566	Upregulated	0.00983645	1388.56	0.0550898	-23.4039	0.206655	269.965
SLC2A9	0.022539	11.8332	Upregulated	0.0600771	16.5707	0.00977832	-34.4242	0.20197	88.5806
ADIPOR2	0.022673	123.026	Upregulated	-0.00697323	147.279	0.0265623	-12.1065	0.634686	602.328
CACNG4	0.0227143	0.378624	Upregulated	0.0602821	0.308431	-0.0221723	0	0.562565	1.36264
HSPA6	0.0227215	217.416	Upregulated	0.110233	547.421	0.0284427	632.81	0.0994052	124.027
PDPK1	0.022755	26.5732	Upregulated	0.0121782	52.6873	0.0695797	60.3343	0.287961	46.0476
CNPY3	0.0227771	833.666	Upregulated	0.0137556	308.553	-0.0380009	186.035	0.22573	4507.21
NRADDP	0.0227948	8.02233	Upregulated		27.0963	0.0783017	2.63521	-0.27879	10.5806
TMEM184B	0.0228217	250.739	Upregulated	0.094325	840.124	-0.0137223	97.0741	-0.0728177	567.231
ZNF746	0.0228249	328.738	Upregulated	0.0791028	1056.13	0.0648312	600.965	-0.422699	315.608
NLRP12	0.0228486	306.544	Upregulated	0.0896607	967.981	0.0613461	539.474	-0.264496	331.921
TMSB4X	0.0228486	6633.52	Upregulated	-0.00498755	6385.11	0.0306833	45.7372	0.351375	33369.9
MYO16-AS1	0.0228769	0.23961	Upregulated			0.0810663	4.52055		-3.88278
DUSP1	0.0229293	821.825	Upregulated	0.0844689	2147.61	-0.14404	1488.52	-0.15887	1295.03
EVI2B	0.0229833	696.602	Upregulated	0.0570766	1822.33	-0.0340265	1063.97	-0.0953411	1293.38
TARDBP	0.0230373	85.223	Upregulated	-0.0504833	121.695	0.145197	-87.45	0.335488	476.663
ATG4B	0.0231185	206.372	Upregulated	0.0303728	96.1955	-0.0673247	-11.7225	0.505837	1153.29
FOXO3	0.0231501	59.2083	Upregulated	0.0989366	927.285	0.0140133	-45.9482	-0.366411	-525.833
MYL3	0.0231606	0.1392	Upregulated	0.0395563	0.536348	0.0542366	0.0273973		0.0384615
SIRPD	0.0231727	14.8991	Upregulated	0.147089	51.3553	0.0383384	34.2095	-0.102811	3.74725
CRKL	0.0231769	19.8016	Upregulated	0.0255319	-7.57579	0.0393041	2.37291	0.683914	123.264
NDST1	0.0231769	360.469	Upregulated	0.182285	1738.25	-0.0354737	274.552	-0.187863	150.048
PAPOLA	0.0231769	115.348	Upregulated	-0.031753	188.901	0.0320843	250.167	-0.0418934	253.064
PROCA1	0.0231769	36.7933	Upregulated	-0.0429909	2.35908	-0.0191096	-19.6301	0.107601	237.985
TREML2	0.0231769	70.5962	Upregulated	0.0987613	171.355	0.0498199	357.717	-0.046515	-105.597
TGFBR1	0.0232262	72.3039	Upregulated	-0.0167316	28.9037	0.0636776	307.298	0.208282	97.3663
LIN7A	0.023227	120.874	Upregulated	0.148272	284.919	-0.119875	461.126	-0.374774	-20.4542
MAP3K11	0.023227	851.157	Upregulated	0.0151292	1607.54	-0.0474455	513.295	-0.161182	2986.3
UNC93B1	0.0232515	511.881	Upregulated	0.0877004	155.54	0.0606146	-55.277	0.0907909	2970.79
TIRAP	0.0233313	5.80893	Upregulated	0.0571265	4.68337	0.0119659	14.0695	0.00416092	16.0275
LOC389634	0.0233359	86.1557	Upregulated		258.018	0.0666229		0.3827
MAPKAPK3	0.0233395	529.992	Upregulated	-0.00949591	764.541	0.0358106	239.882	-0.00462371	2175.51
IP6K2	0.0233561	64.9401	Upregulated	-0.0347039	8.95826	0.0690449	-6.95332	0.49503	387.106
SFRP1	0.0233631	2.41373	Upregulated	0.0620416	-2.42367	0.0222702	12.2212		2.18681
DAPK3	0.0233719	152.956	Upregulated	0.0451843	430.418	-0.0358188	3.45205	0.146702	483.712
LILRA1	0.0233719	30.1894	Upregulated	0.0400307	70.2068	0.0472822	112.861	-0.502915	-1.51648
LAT2	0.0233904	712.662	Upregulated	0.0662068	2102.1	-0.0503931	184.406	-0.213009	1989.67
RFNG	0.0234112	103.726	Upregulated	0.0457425	-2.69318	0.0151322	22.6169	0.182525	602.19
DENND3	0.0234177	488.46	Upregulated	0.116116	1133.79	0.08648	1730.13	-0.36349	67
IDH1	0.0234451	64.2138	Upregulated	0.0817771	127.948	0.00376706	-4.22171	0.326598	261.145
PHKA2	0.0234456	65.8352	Upregulated	0.016142	213.61	0.109173	39.4713	0.101501	141.703
TEX13B	0.0234456	0.352031	Upregulated	0.0144331	1.86853	0.0424156	0.0410959	0.145707	0
GPR160	0.023457	59.0905	Upregulated	0.111894	312.382	0.0175257	81.8544	0.162015	-39.9853
PSMB9	0.0234939	965.603	Upregulated	0.0307414	5814.09	0.14615	-21.8427	0.0666091	1.13187
C8orf58	0.0235019	45.5179	Upregulated	0.0481214	174.331	0.000894247	-10.313	0.110114	108.93
NDE1	0.0235143	249.934	Upregulated	0.0144509	1323.95	0.0987958	173.342	-0.218229	2.42125
GSN	0.0235603	366.822	Upregulated	0.102962	141.105	0.0458546	555.455	-0.0584261	1504.28
TTC7B	0.0236094	29.3641	Upregulated	0.223656	102.238	-0.00505163	-3.62608	0.185437	77.1685
ADM5	0.023632	7.74386	Upregulated	0.0324843			3.53425		19.6648
SNORD12	0.0236919	7.43659	Upregulated		23.5053	0.177798	13.9137	-0.413873	0
STARD3	0.0236985	254.528	Upregulated	0.0142532	490.893	-0.0353809	29.0183	0.127245	1007.15
RNF113A	0.0237308	85.7925	Upregulated	-0.0630194	277.068	0.0712238	-7.6002	0.126428	245.152
GRINA	0.02378	428.41	Upregulated	0.190509	22.3997	-0.0332614	605.718	0.15144	1942.03
LOC100507507	0.02384	107.272	Upregulated		320.901	0.0242475		0.890439
PAX6	0.0238458	0.377521	Upregulated	-0.00869077	1.46134	0.0194505	-0.0192796	0.222563	0.589744
NFE2	0.023885	2021.79	Upregulated	0.114866	7994.56	-0.0229303	1268.2	-0.372244	2868.26
SLC17A5	0.023942	18.8667	Upregulated	0.0383498	58.5873	0.0630027	12.7489	0.530002	41.2326
ZFP64	0.0239681	3.40196	Upregulated	0.0376992	-2.49409	0.0690008	-47.4242	0.300223	69.9231
LDHA	0.0240439	169.834	Upregulated	0.0243747	157.799	0.0984694	-240.616	0.317971	1101.38
BAZ1B	0.0240668	38.3177	Upregulated	-0.0528837	-70.4279	0.122641	-49.3049	0.655466	348.914
COL28A1	0.0240668	0.609817	Upregulated	0.0207514	-0.53545	-0.0641547	2.72451	-0.66807	2.18132
FAM151A	0.0240668	1.17106	Upregulated	0.069056	2.67364	0.00453797	-0.120751	-0.116607	4.51648
LOC644936	0.0240668	0.168327	Upregulated			0.168327
CBL	0.024082	70.5198	Upregulated	0.0579093	56.9496	0.0326915	730.115	0.174494	-364.211
CCDC149	0.0241069	24.69	Upregulated	0.0963386	21.4265	-0.00202077	-33.2588	-0.178787	160.057
BCORL1	0.0241187	59.306	Upregulated	0.0781917	56.3454	-0.00177707	136.197	-0.0869292	163.304
LSMEM1	0.0241187	6.24633	Upregulated	0.142325			59.8128		-41.2161
NUDT1	0.0242226	44.8417	Upregulated	0.0425421	69.5151	-0.0517608	10.411	0.215588	188.918
ESRRA	0.0243639	145.282	Upregulated	0.041615	326.045	-0.0762594	17.8884	0.1514	527.641
PITPNA	0.0245176	166.245	Upregulated	0.0534709	662.623	0.103467	54.5317	0.0108604	280.148
ABCB6	0.0245413	4.07072	Upregulated	0.0603714	10.3433	0.0158266	0.826991	-0.190266	13.3681
HNRNPK	0.0245611	378.586	Upregulated	0.0258519	229.369	0.0546296	137.606	0.149213	1904.31
ALOX5	0.0246392	850.865	Upregulated	0.110155	4604.33	-0.0189453	325.437	-0.0726019	175.403
TMEM255B	0.0246806	11.024	Upregulated	0.108643			0.437849		32.5256
RABAC1	0.0246956	481.916	Upregulated	0.0880545	1829.17	-0.127158	6.379	-0.149269	1056.13
EPOR	0.0247296	23.4371	Upregulated	0.0927163	30.9638	-0.0377217	31.2029	0.287331	78.1136
CD44	0.0247804	400.054	Upregulated	-0.0140464	1737.07	0.142335	-942.714	0.269764	1605.57
POLD4	0.0247973	140.635	Upregulated	0.00312924	469.252	-0.0580489	27.9675	0.15828	346.485
UBR2	0.0248311	191.032	Upregulated	0.0384698	247.982	0.0847859	1107.76	-0.323827	-209.35
ANAPC13	0.0248633	69.1647	Upregulated	-0.0372288	185.529	0.0505691	17.135	0.105825	212.205
SNX11	0.024899	166.881	Upregulated	0.0583989	177.963	0.0139052	105.817	-0.068552	717.505
ZMPSTE24	0.024899	157.122	Upregulated	0.0518753	778.234	-0.0233376	85.0041	0.201196	79.2637
RSAD2	0.0249113	1504.58	Upregulated	0.301601	605.048	0.22911	-211.452	0.00214213	8633.36
CALM3	0.0249473	430.726	Upregulated	-0.0208387	195.598	0.0111816	125.074	0.217636	2263.48
ATOH8	0.0249566	18.9225	Upregulated	0.058418	-7.14724	-0.0238284	-13.1507	-0.00550651	133.804
DOCK6-AS1	0.0249566	4.51527	Upregulated				4.069		4.96154
WAC	0.0249566	207.807	Upregulated	0.0254227	959.139	-0.00629922	151.244	-0.0130346	136.454
PNKD	0.0249639	157.662	Upregulated	-0.00501467	34.454	-0.0817544	99.0244	0.165742	812.418
HCK	0.0249669	1123.49	Upregulated	0.0676971	1090.14	0.0784443	1126.62	-0.184819	4524.22
LRRC4	0.0250349	122.393	Upregulated	0.122682	308.156	-0.0314419	556.979	0.070654	-130.938
IPMK	0.025036	48.4033	Upregulated	0.0407841	29.105	-0.0590168	500.895	0.354914	-239.918
MAX	0.0250436	447.756	Upregulated	0.00770687	487.948	-0.0810609	284.611	0.026563	1914.02
TEK	0.0250556	2.13966	Upregulated	0.0266389	19.5034	0.00772596	3.90817	0.0293715	-10.6374
SNORA21	0.0251061	31.2993	Upregulated	-0.0505549	187.904	0.177178	0	-0.235161	0
ZDHHC5	0.025139	71.502	Upregulated	0.0316324	77.8811	0.0537526	33.0071	0.113714	317.925
ATF6	0.0251643	46.7408	Upregulated	0.0464774	72.7491	0.0353224	141.029	0.0812547	66.5037
DICER1	0.025223	37.3553	Upregulated	-0.0121765	355.016	0.081153	458.371	0.222145	-589.546
UFC1	0.025223	110.644	Upregulated	-0.0565912	74.1448	0.0532504	-15.3379	0.144925	604.918
MORC3	0.0252646	99.7969	Upregulated	0.0450878	215.056	0.0708137	147.706	0.299395	235.604
SUMF1	0.0253088	53.3485	Upregulated	0.0847972	122.386	-0.0065358	-24.3846	0.392175	221.619
NETO2	0.025322	4.81209	Upregulated	0.0266415	20.9273	0.114448	-7.77169	0.257122	15.3187
GPN3	0.0253341	58.6071	Upregulated	0.0311034	225.293	-0.0509423	5.46423	0.0900821	120.815
TRPC4AP	0.0253584	242.485	Upregulated	0.0356481	26.5497	0.0212099	172.667	-0.114864	1255.75
HDAC4	0.0253794	105.014	Upregulated	0.0854083	231.018	-0.0296289	215.668	0.242185	183.101
PAPSS2	0.0254464	0.326512	Upregulated	0.0131033	12.3605	0.0491379	11.7707	0.320611	-22.5549
GGT1	0.0254657	53.7448	Upregulated	0.0921358	14.9365		-6.61948	-0.0937381	260.408
GNG5	0.0254926	243.843	Upregulated	0.0558789	725.179	-0.108498	36.6738	0.292587	700.963
DECR1	0.0254951	69.3854	Upregulated	0.0440613	177.059	0.071118	8.23846	0.0847248	230.815
TRIM34	0.0254982	6.8006	Upregulated	0.0477325	32.451		0.988838	0.194942	0.320513
ZMAT2	0.0255328	265.537	Upregulated	0.0132895	938.374	0.0809984	145.739	-0.156647	509.172
SYN1	0.02555	0.761908	Upregulated	0.0596344	2.22328	-0.00539117	2.4414	0.246305	-0.393773
AFP	0.025566	0.410147	Upregulated	0.012747	1.95789	0.0142443	0.0273973		0.0384615
WDSUB1	0.0255673	4.53829	Upregulated	0.0873945	10.8523	0.0819878	-16.037	0.380608	31.8645
CD59	0.0255905	31.0287	Upregulated	0.123727	2.6848	0.0341415	78.7073	0.353245	104.269
POP7	0.0256389	158.846	Upregulated	-0.00234547	823.604	-0.0821064	3.53983	0.420285	125.597
ZNF512	0.0257508	28.2625	Upregulated	-0.0927125	-63.364	0.145643	-50.9701	0.693279	283.163
FAM114A1	0.0257871	5.81451	Upregulated	0.0119044	2.15816	0.0164584	6.70472		20.1813
MAF1	0.0257871	303.411	Upregulated	0.071848	-27.2401	0.0163278	388.015	0.0637571	1459.54
CARD9	0.0257929	100.113	Upregulated	0.114444	132.087	-0.085263	-23.3562	0.164991	491.753
POLB	0.0258118	42.1466	Upregulated	0.0478397	16.6854	0.137787	18.3151	-0.00230326	217.696
HSPA1A	0.0258128	780.932	Upregulated	0.0616121	4687.23	0.0362016	-0.037037	0.418682	-2.12271
ATP5MF	0.0258463	94.0925	Upregulated	0.0115938			-11.344		293.61
DNAJC9P1	0.0258463	0.71929	Upregulated				1.09792		0.340659
EMR1	0.0258463	37.7056	Upregulated		113.018	0.402975		-0.304126
PSMB4	0.0258463	869.891	Upregulated	-0.0119613	3051.83	-0.0280172	-27.449	-0.174925	2195.18
ZNF777	0.0258463	15.2888	Upregulated	0.0182865	-8.79652	0.0580835	-16.102	0.805659	115.749
TIAM2	0.0258801	37.9889	Upregulated	0.0616035	127.565	0.0490076	43.4673	-0.130904	56.9212
SNORA12	0.0258952	53.5993	Upregulated		269.446	0.335242	-1.09082	0.016239	-0.710623
EIF1	0.0259	4571.21	Upregulated	-0.0182137	21950.8	-0.0192903	138.3	0.499495	5337.7
PSMC5	0.0259	178.074	Upregulated	-0.089213	-12.958	0.0885609	-77.8904	0.443886	1158.85
UBE2J2	0.0259354	115.751	Upregulated	0.0519455	81.6003	-0.00413923	19.377	0.0418801	593.438
MAPK7	0.0260346	25.8468	Upregulated	0.0384376	-38.035	0.012766	12.2719	0.690052	180.103
FOXD4	0.0261043	1.31563	Upregulated	-0.0095002	4.15242	-0.115241	1.98529	0.585962	1.29487
TMEM86B	0.0261043	41.9287	Upregulated	0.144519	-25.4728	-0.000583718	141.5	0.0492683	135.352
ABCB10	0.0261429	15.4659	Upregulated	0.102347	2.0751	0.0942203	31.3912	0.191011	58.9414
GRAMD1A	0.0262339	331.251	Upregulated	0.0206895	13.8677	-0.0510317	176.988	0.607293	1796.07
C1QA	0.0263264	6.18129	Upregulated	0.0874222	3.49311	0.053779	3.15677	0.201391	30.0952
SCRN2	0.0263305	50.3756	Upregulated	-0.00429483	-23.7543	0.0967894	-20.5297	-0.13184	346.577
APLN	0.0263367	1.67126	Upregulated	0.0499165	7.11209	-0.000325808	0.460173		0.734432
RBBP8	0.026339	6.05225	Upregulated	-0.0419783	30.1426	0.0775208	2.29883	0.255981	3.58059
PCDHB9	0.0263466	1.23415	Upregulated	0.0268982	5.15647	0.00575344	0.0273973		0.954212
CS	0.0263591	186.303	Upregulated	0.00714839	254.427	0.0528462	-180.933	0.104058	1044.16
TTC7A	0.0263684	145.01	Upregulated	-0.0125882	130.521	0.0985023	-339.703	-0.00437066	1079.16
NDOR1	0.0264074	64.2719	Upregulated	0.0518884	38.7248	-0.0834389	-1.75342	0.125356	348.566
EPHX3	0.0264568	32.8773	Upregulated	0.0604845	192.381	0.0146813	-0.591071	-0.116084	5.51465
DEDD2	0.0264596	342.484	Upregulated	0.0315948	334.035	-0.000744705	360.975	0.00240387	1359.86
CCDC125	0.0264847	75.6784	Upregulated	0.0946058	413.646	0.0287466	19.2212	-0.627159	21.707
CTDP1	0.0264847	49.1611	Upregulated	0.0355113	-6.54863	0.016471	41.1867	0.282269	259.995
GSTP1	0.0265454	1592	Upregulated	0.0245825	6066.37	0.0719621	-165.122	-0.140012	3650.81
BUB3	0.0265494	40.4572	Upregulated	-0.0793138	-71.397	0.149875	-108.433	0.471294	422.031
COX6A1	0.0265494	948.861	Upregulated	-0.0123574	5414.9	0.0418341	2.15271	-0.105722	276.189
OXSR1	0.0265603	64.9266	Upregulated	0.0220724	231.962	0.10611	47.2395	0.267229	109.963
CLEC4A	0.0265849	195.827	Upregulated	0.0737325	1130.09	0.112216	42.1963	-0.506659	2.99817
MFSD2A	0.0266383	21.5707	Upregulated	0.0453648	24.947	0.000813483	-3.15322	0.170072	107.414
BST2	0.0266614	644.933	Upregulated	0.0244816	587.329	0.0287317	-82.4855	0.307485	3364.39
FAM3D	0.0266867	2.16367	Upregulated	0.0627935	7.03595	-0.0580436	0.562151	0.205151	5.17399
MBLAC1	0.0267359	2.47914	Upregulated	0.011039	-4.71479	-0.059739	-0.201928	0.466625	19.3736
MCOLN2	0.0267359	6.2266	Upregulated	-0.0930126	-37.3817	0.171482	-33.7676	0.108133	108.322
FXR2	0.0267453	75.3289	Upregulated	0.0047467	-0.154858	0.0444872	32.1502	0.163416	419.766
ATG13	0.0267628	164.21	Upregulated	0.0189975	-18.4574	0.095179	115.537	0.0324043	888.031
RAI2	0.0267826	2.82075	Upregulated	0.110218	12.8699	0.0124884	3.25977	-0.327937	1
STARD8	0.0267881	14.3088	Upregulated	0.0919693	8.14083	0.00951279	-11.9056	0.477727	89.0385
KIAA0922	0.0268427	108.427	Upregulated		324.664	0.0601806		0.556334
AHCYL1	0.0269017	33.7191	Upregulated	1.33295e-05	129.171	0.109932	-64.6712	0.291242	137.414
THRA	0.0269603	60.6531	Upregulated	0.0247031	168.911	0.0838585	-7.59462	0.441891	202.051
SUCLA2	0.0269919	14.5809	Upregulated	0.0188528	8.12327	0.0922483	-37.2765	0.179399	116.348
RBM23	0.0270114	91.381	Upregulated	0.0599555	5.62835	0.15084	90.2532	0.283599	451.91
TERF2IP	0.0270143	62.9811	Upregulated	0.0257467	222.571	0.13488	-45.175	0.179529	200.15
KLHL30	0.0270503	2.82779	Upregulated		3.62262	0.031636	2.11111		5.54579
SAG	0.0270558	1.17061	Upregulated	0.0565442	4.88018	0.028025	0.849822		0.0384615
ANXA2	0.0270683	572.251	Upregulated	0.00250492	578.759	0.16467	-384.574	0.161199	3238.99
PSMA5	0.0270683	229.811	Upregulated	-0.0693447	492.924	0.0394317	-52.2116	0.163708	938.018
PLEKHO1	0.0270809	1276.59	Upregulated	-0.0086958	4601.49	0.0782327	27.5865	-0.0257044	3030.39
BRPF3	0.0270942	28.0943	Upregulated	0.00770066	6.81905	0.0408751	107.828	0.353839	53.5165
NDUFB6	0.0271109	168.102	Upregulated	0.0592782	631.877	-0.0889892	22.38	-0.389668	354.771
TTPAL	0.0271708	20.4072	Upregulated	0.00351732	51.5575	-0.137537	70.1471	0.262592	0.60989
CHST11	0.0272008	185.089	Upregulated	0.0695625	106.339	0.0182411	581.747	-0.0572301	422.416
C5orf15	0.0272114	22.2741	Upregulated	0.0832274	-2.39494	-0.00333058	-12.1451	0.278955	147.826
CHMP1B	0.027291	133.634	Upregulated	0.0802459	503.368	-0.0470195	324.963	-0.264278	-26.2985
TRIM41	0.0273033	136.532	Upregulated	0.00717637	337.808	0.0264754	-30.7123	0.265016	511.799
DEDD	0.0273385	59.2377	Upregulated	0.0459292	6.90244	-0.0264779	56.2035	0.258881	292.042
MIB1	0.0274159	10.4822	Upregulated	0.0237638	34.9515	0.048045	77.5713	0.0772976	-49.7784
WFDC3	0.0274418	6.53333	Upregulated	-0.00868667	36.904	0.031983	0.205987	0.0757884	1.99084
IARS2	0.0275081	16.1617	Upregulated	-0.0258964	-38.0334	0.142964	-96.899	0.446615	231.339
COQ10B	0.0275397	16.1393	Upregulated	0.0412022	14.0108	0.0724591	40.445	-0.261246	42.5275
APLP2	0.0275579	529.98	Upregulated	0.0351854	1734.59	0.118763	-606.431	0.359932	2051.2
NCF4	0.0275579	596.302	Upregulated	0.0730067	1588.62	-0.0461288	775.133	-0.337187	1214.37
TUBA4A	0.0275762	780.78	Upregulated	0.0837785	1438.56	-0.0615261	453.568	-0.0500553	2792.58
NANS	0.0275825	166.332	Upregulated	-0.00624936	657.487	-0.0778562	-8.61644	-0.267393	349.474
TMEM214	0.0275929	135.878	Upregulated	0.0113257	204.775	0.0847773	-85.4505	0.358533	695.489
NAGK	0.0275974	865.497	Upregulated	0.0238863	581.207	0.0293274	-112.928	0.257394	4724.39
ZNF362	0.0276127	44.5851	Upregulated	0.0313323	35.2568	-0.0480557	-19.0406	0.681083	250.63
ARHGEF5	0.0276254	1.06272	Upregulated	-0.0455713	-11.0097	-0.0276286	2.8483	0.821548	13.7894
CD300E	0.0276254	621.577	Upregulated		292.23	0.160159	-388.203	0.0790848	3203.62
LYVE1	0.0276254	3.15627	Upregulated	0.0347811	2.18568	0.0290723	16.5703		-3.03846
SPAG7	0.0276254	85.7305	Upregulated	-0.019823	12.4938	0.00483157	-6.52664	0.302488	508.128
TAF12	0.0276254	175.329	Upregulated	-0.0129419	839.115	0.00918047	2.28108	-0.0118736	210.592
MON1A	0.0276535	21.4041	Upregulated	-0.0283955	-3.59086	0.0375676	-9.30898	0.282104	141.033
TLR6	0.027657	92.8093	Upregulated	0.11784	18.8976	0.0196332	998.045	-0.584746	-459.639
INSIG2	0.0277015	10.913	Upregulated	0.0380393	24.2142	0.0379489	16.6068	0.251497	24.3297
ZMIZ1	0.0277015	66.0759	Upregulated	0.0094742	262.485	0.101304	284.819	0.0679212	-151.027
PSTPIP1	0.0277042	685.336	Upregulated	-0.0322026	896.978	0.0611566	144.458	-0.0359101	3070.59
CEP19	0.0277225	63.2098	Upregulated	0.0818239	244.819	0.0701872	71.2826	-0.204892
MRPL21	0.0277316	48.7472	Upregulated	-0.0625295	118.656	0.0809558	-16.0041	-0.0829973	189.896
DPYSL4	0.0277592	13.1866	Upregulated	-0.0190606	-18.0309	0.0329354	15.4566	0.298816	81.381
ZNF598	0.0277592	58.443	Upregulated	0.06523	108.356	0.00743405	-14.3866	0.437891	256.178
PXK	0.0278059	28.3328	Upregulated	0.0946789	195.692	0.022108	99.932	0.144017	-125.888
BID	0.0278063	669.405	Upregulated	-0.00861322	2836.49	-0.0362895	330.752	-0.605332	849.837
SNX6	0.0278143	104.028	Upregulated	0.028117	246.254	0.0503591	-15.4921	0.121145	393.207
PYGM	0.027819	25.2183	Upregulated	0.0812077	11.0389	0.0163585	8.19178	-0.443343	132.425
EHBP1L1	0.0278451	706.514	Upregulated	-0.00330177	282.652	0.0813856	155.853	0.111826	3800.39
POLDIP2	0.027851	110.711	Upregulated	0.0350632	68.4703	-0.0665423	-0.231355	0.666964	595.39
TBL2	0.0278582	44.6084	Upregulated	0.0172417	93.8432	-0.0592745	1.61695	0.340341	171.892
U2AF2	0.0279237	334.534	Upregulated	0.032488	382.278	0.0132582	-32.6169	0.35184	1657.15
ELANE	0.027956	3.45662	Upregulated	0.298521	-27.9002	-0.0959994	43.553	0.151796	4.7326
ORAI1	0.027956	180.549	Upregulated	-0.0368291	-286.719	-0.00790336		0.735211	1188.77
ARHGAP19	0.0279579	27.5708	Upregulated	0.0987558	27.6669		89.6555	-0.00132841	20.4341
CSF2RB	0.02798	162.259	Upregulated	0.0654511	50.1887	0.0522697	2051.66	-0.152049	-1128.26
SEMG1	0.0280496	2.40245	Upregulated	0.11085	8.79326	-0.0867788	3.72197	-0.424969	2.30037
KIF27	0.0281093	20.6552	Upregulated	0.0734955	9.57289	0.0663915	151.964		-58.4011
NCAM1	0.0281341	10.0816	Upregulated	0.00921338	43.1242	0.0109798	8.72349	0.112385	8.50916
CSNK1G2	0.0281605	382.293	Upregulated	0.0346353	485.988	0.0150281	152.941	-0.0783331	1654.86
RAB5A	0.0281737	45.7029	Upregulated	0.0402701	280.384	0.0110103	66.5515	0.100165	-72.87
FKBP1A	0.0281835	467.886	Upregulated	0.109948	-24.6815		259.247	0.179647	2104.57
SPATA6	0.0281835	1.28223	Upregulated	0.0772188	5.59288	0.046601	6.91933	0.2277	-5.17033
TSPAN33	0.0281869	19.1221	Upregulated	0.0381832	-88.0562	0.040597	21.6088	0.0629485	181.038
PTDSS1	0.0282265	130.28	Upregulated	0.00877769	163.649	0.0603916	-122.135	0.248313	739.85
AMN1	0.0282391	4.62329	Upregulated	0.0756676	-1.8041	0.0953286	29.8108	0.221419	-0.659341
GFER	0.0282763	19.464	Upregulated	0.0482715	4.60926	0.0436024	-13.0599	-0.100994	125.244
SFTPB	0.0283568	0.731212	Upregulated	0.0584762	-1.33912	-0.0683167	1.43176		3.57326
RBM47	0.028388	6.81379	Upregulated	0.0659457	380.287	0.100988	405.757	-0.0756218	-745.253
DMAP1	0.0285148	97.0585	Upregulated	0.0403795	-16.0439	-0.105707	-53.5023	0.828552	651.134
LYPLAL1-DT	0.0285148	2.06293	Upregulated				4.14967		-0.0238095
PUS3	0.0285148	11.1269	Upregulated	-0.090592	0.729212	0.0954683	-14.8838	-0.0266677	80.9377
SIPA1L2	0.0285148	51.9074	Upregulated	0.269045	248.079	0.143432	10.9488	0.0962962
TCEB1	0.0285148	485.853	Upregulated		1457.67	0.00802512		-0.11547
NPM2	0.0285187	0.884806	Upregulated	0.0659412	1.02327	0.0600846	0.593607	-0.150181	3.71612
PPFIA1	0.0285719	60.3302	Upregulated	0.011915	26.0029	0.0326256	248.673	0.147241	87.1136
SCARB2	0.0285853	131.556	Upregulated	0.0117182	320.682	0.135536	-112.202	0.353971	580.353
LSM3	0.028697	49.669	Upregulated	-0.012623	239.109	0.103402	-13.7504	-0.300087	72.8645
MIR503HG	0.0287861	3.48404	Upregulated	0.0729149			-0.510908		10.8901
CAPZB	0.0287861	648.729	Upregulated	0.0445492	-58.009	0.0129873	184.827	0.0993561	3765.4
HOOK3	0.0288002	21.9131	Upregulated	0.0320716	98.4601	0.163185	-94.1761	0.143698	126.855
PTPN18	0.0288379	398.995	Upregulated	-0.00246309	108.263	0.0469152	-51.9305	0.220575	2337.38
NEU1	0.0288756	43.971	Upregulated	0.0858288	256.676	-0.045151	6.80822	0.19477	0.106227
CD244	0.0289134	125.109	Upregulated	-0.0114684	84.8186	0.044113	-22.3364	0.191417	687.947
MEMO1	0.0289701	7.50522	Upregulated	0.0967164	30.4001	0.0288607	-5.17047	-0.00886842	19.685
CORO1B	0.0290086	241.523	Upregulated	0.0158905	64.8047	-0.0421799	36.2136	0.295665	1347.85
FTL	0.0290086	10478.7	Upregulated	0.0180684	4556.78	0.0121777	6099.03	-0.118713	52216.7
JAG1	0.0290086	2.12	Upregulated	0.072877	8.16964	0.0685273	0.16895
ZIC4	0.0290647	1.03582	Upregulated	0.0661925	5.74321	0.0204661	0	0.432662	-0.047619
ATG7	0.0291027	64.133	Upregulated	0.0770987	52.5507	0.131203	-69.3044	-0.061071	401.405
SAMD4A	0.0291368	15.2692	Upregulated	0.0159408	13.8769	0.0308468	-21.0675	0.0375079	98.7216
DSC2	0.0291672	106.728	Upregulated	0.242528	37.2836	-0.0640548	522.328	-0.162757	80.7381
AUH	0.0291786	5.29286	Upregulated	0.107666	22.0824	0.0972485	-4.65956	0.23014	13.8993
PIK3CG	0.0291977	18.7637	Upregulated	-0.0361437	275.327	0.0490247	296.328	0.144744	-459.231
PPP2R3B	0.0291977	4.38683	Upregulated	0.0707571	19.6277	-0.0224496	0	0.278668	6.3663
RRBP1	0.0292357	83.2613	Upregulated	0.0601166	50.6928	-0.0176713	-149.387	0.27111	597.949
SNX12	0.0292862	42.8295	Upregulated	0.00783829	69.5477	0.0493857	-14.555	0.0661418	201.861
CNP	0.0292908	205.666	Upregulated	-0.0100559	279.447	0.0792095	-6.40994	0.463062	960.427
ARSA	0.0293406	769.927	Upregulated	0.047833	3398.11	-0.0994444	29.8123	0.33619	1191.36
MAP3K10	0.0293501	16.1469	Upregulated	0.0317849	-73.6164	0.0625154	-57.9224	0.107708	228.218
CCT7	0.0294041	214.559	Upregulated	-0.0842605	-145.428	-0.00140298	-89.6509	0.528114	1521.99
DOCK8-AS1	0.0294041	1.6629	Upregulated	0.176426			7.70421		-2.89194
NHSL1-AS1	0.0294041	20.0196	Upregulated				-4.74277		44.7821
RPS3P4	0.0294041	46.4656	Upregulated				1.10705		91.8242
CCNDBP1	0.0294361	265.471	Upregulated	0.0549104	377.994	0.071316	304.583	-0.186778	910.311
ZFP36	0.0294483	667.686	Upregulated	0.0635524	3121.82	-0.0140198	911.935	0.298325	-27.9835
KDM1B	0.0295318	10.7501	Upregulated	0.0172757	3.56071	0.176813	69.2963	0.321577	-8.87179
SLC6A13	0.0295729	2.2141	Upregulated	0.0712104	8.72563	-0.00969132	1.28869	0.142801	3.06593
SQSTM1	0.0296415	185.447	Upregulated	0.0120853	615.172	-0.0373795	415.218	0.0896145	82.2271
ADAM17	0.029669	0.930293	Upregulated	0.0109397	52.5464	0.0570875	43.5373	0.0618777	-90.6319
SUOX	0.0297516	14.0909	Upregulated	0.124142	8.54713	0.0327598	-3.83105	0.134261	79.5385
BRDT	0.0297968	0.383044	Upregulated	0.00148261	0.847025	0.0362697	0.288686		0.741758
ITGAM	0.0298067	390.104	Upregulated	0.0595184	1522.59	0.0209797	253.749	0.477787	563.722
ICAM5	0.0298108	3.34258	Upregulated	0.136537	7.95589	-0.0255065	2.41147	-0.428405	10.0055
NPC2	0.0298593	1153.99	Upregulated	0.00695229	5290	0.0382839	-27.7925	0.264836	1661.41
NSUN7	0.0298604	6.78388	Upregulated	0.141579	65.2744	0.022995	50.0812	-0.505485	-74.3114
MTRF1L	0.0299241	9.57945	Upregulated	-0.0538156	11.1247	-0.0312336	28.415	0.309527	17.7125
LIMK2	0.0299268	347.994	Upregulated	0.0669484	1232.52	0.0675151	808.249	-0.120048	47.1777
POLG	0.0299366	93.787	Upregulated	-0.0183353	-64.4022	0.110522	-94.4835	0.491583	721.024
RPL39L	0.0299453	1.26787	Upregulated	0.0222783	4.15692	0.0900299	0.194825	0.11385	3.0293
ACADS	0.0299655	47.7241	Upregulated	0.0301766	-3.77496	-0.0677172	10.9274	0.225844	279.004
CWC22	0.0299879	2.29596	Upregulated	0.0968165	33.2655	0.124967	-15.7544	-0.424137	-3.53297
LINC00482	0.030028	12.8794	Upregulated	0.114935	36.0469	-0.0603066	1.37392	0.0319531	39.7692
ZNF408	0.0300625	41.9085	Upregulated	0.0475739	-0.0481665	-0.0782755	11.9985	1.02571	238.505
NSDHL	0.0300838	37.234	Upregulated	-0.0180288	109.886	-0.0431291	-5.10096	0.328375	118.352
C8orf34	0.0300974	0.378878	Upregulated	0.00841561	2.33852	0.0210263	0.0273973	0.0683886	-0.190476
HEATR3	0.030153	55.0183	Upregulated	-0.0412615	21.2664	0.0116492	35.2319	0.104741	273.537
TUBA1B	0.0301669	284.527	Upregulated	0.0120894	1242.36	-0.0470241	65.4708	0.525312	398.841
PDE6H	0.0301693	1.82094	Upregulated	0.151016	4.98554	-0.0314012	1.46474		2.5348
MARK3	0.0301798	224.627	Upregulated	0.0846316	1016.66	0.0974894	8.7727	-0.102635	322.253
BTNL3	0.030247	301.326	Upregulated	0.0234878	1603.33	0.0789185	72.7854	-0.198204	131.936
CLMN	0.0302932	22.8428	Upregulated	0.0716961	12.3249	0.160462	-167.609	0.116616	291.993
KLF13	0.0302932	535.377	Upregulated	0.0335986	2867.35	-0.000684831	116.831	0.192473	227.861
PRELID1	0.0302932	353.649	Upregulated	-0.0378759	878.341	0.00609135	49.69	-0.117906	1194.01
PSMB2	0.0302932	99.7138	Upregulated	-0.0406812	30.8701	0.0236799	-75.9533	0.525975	642.857
SCOCP1	0.0302932	1.34478	Upregulated				2.62912		0.0604396
IWS1	0.0303082	19.8656	Upregulated	-0.023461	7.18781	0.11077	-6.08676	0.589207	117.416
PPIB	0.0303743	101.764	Upregulated	-0.057027	100.591	0.081682	-194.425	0.166789	704.225
MRPL16	0.0303939	63.6102	Upregulated	-0.0558281	148.818	0.101205	-19.6002	0.366495	252.031
BLOC1S1	0.0304369	56.6187	Upregulated	-6.03051e-05	127.518		19.0441	0.165417	136.366
ARF3	0.0304526	312.004	Upregulated	0.0793288	152.334	0.00481478	173.148	-0.110494	1546.57
CYP2C9	0.0304603	0.518932	Upregulated	0.0267261	2.50935	0.00642688	0.0136986		0.0384615
ICAM1	0.0305014	13.1194	Upregulated	0.107666	149.067	0.0109909	166.472	-0.065369	-236.875
PLXNB2	0.0305507	276.364	Upregulated	0.0497478	-82.793	0.104398	-441.434	0.170459	2182.09
PLOD1	0.0305586	78.1761	Upregulated	0.131707	40.1963	0.0822246	41.3541	-0.154806	387.447
ROMO1	0.0305589	179.747	Upregulated	0.0204428	804.361	-0.0182944	-0.387113	-0.0872341	274.595
NOS1	0.0306008	0.300206	Upregulated	0.00681478	1.15388	0.00875211	0.0806697		0.250916
LACTB2	0.0306572	5.83913	Upregulated	0.0240652	19.9137	0.0271211	-11.0863	0.0572581	26.0989
C19orf38	0.030663	378.896	Upregulated		271.22	0.0061118	107.28	0.0116609	1515.96
CLPTM1L	0.030663	27.4506	Upregulated	0.0477886	-21.7424	0.0183209	-89.5535	0.532145	275.401
UGGT2	0.0306713	285.768	Upregulated	0.0167238	1716.86	0.0131817	-12.725	0.343259	10.1044
HSF1	0.0306954	219.494	Upregulated	0.00361578	433.281	-0.110474	-5.43227	0.242924	888.976
ERICH6	0.0307939	0.990112	Upregulated	-0.0529859			1.14054		1.88278
DPYSL2	0.0308464	11.2996	Upregulated	0.0375263	10.284	0.173794	-461.816	0.384396	518.734
MEFV	0.0308901	327.597	Upregulated	0.0692904	18.9434	0.142258	902.783	-0.111776	1043.75
S100A11	0.0309454	1904.72	Upregulated	0.0711677	387.672	-0.0250244	1294.62	0.121576	9745.87
STAT5B	0.0309552	443.918	Upregulated	-0.0228081	875.755	0.115286	875.524	-0.0789182	912.212
SLC4A1AP	0.0309878	33.7998	Upregulated	0.0616615	100.288	0.0297014	-8.36225	0.51929	110.262
OTX1	0.031053	13.4455	Upregulated	0.0665837	31.7156	-0.0444594	28.9452	0.138158	19.8516
GLB1L3	0.0311108	5.78911	Upregulated	0.0562104	3.94522	0.00920764	8.43125		16.5037
MYO7B	0.0311536	29.949	Upregulated	0.0387206	18.2068	-0.0486088	10.6058	0.0433572	150.848
FSTL4	0.0311823	3.17398	Upregulated	0.0602084	9.66963	0.0209421	6.18874		-0.0695971
GPBAR1	0.0311823	146.653	Upregulated	0.0836904	86.843	0.0262346	-2.96601	0.332064	795.601
IGF1R	0.0311823	193.035	Upregulated	0.154127	114.561	0.0470975	823.895	-0.290141	219.841
TOP1	0.0312177	47.7516	Upregulated	0.0197986	8.24973	0.228406	6.3861	0.154667	271.471
BUD31	0.031225	58.0739	Upregulated	0.0222005	228.27	0.0727298	7.96956	-0.279972	112.388
CACNA1B	0.0312965	0.267995	Upregulated	0.0381173	-0.0621453	0.0219907	0.324708	0.195557	1.08974
NARF	0.0313236	275.12	Upregulated	0.198429	356.02	0.0269648	-30.2699	-0.208975	1324.95
CNN2	0.0313636	1068.95	Upregulated	0.0325414	1587.3	-0.0508794	1497.51	0.216894	3328.68
TSC22D3	0.0313682	2748.8	Upregulated	0.042297	6766.91	-0.139039	1797.97	0.0224894	7927.98
EGFL7	0.0313803	6.50856	Upregulated	0.0766689	1.16591	-0.0873214	8.91629	0.14098	28.8388
DHCR7	0.0314245	2.89387	Upregulated	0.0851968	-58.5058	-0.00297374	0.899543	0.826799	74.0604
APOL4	0.0314544	6.85649	Upregulated	0.00794785	-5.17969	0.00928378	1.81126	0.048751	44.4414
SLC48A1	0.031479	89.5544	Upregulated	0.0773163	23.9318	-0.0379059	197.886	-0.0671583	315.537
PCBP2	0.0314975	368.74	Upregulated	-0.0519545	123.717	0.0334734	304.294	0.395579	1784.05
CPM	0.0315038	17.1232	Upregulated	0.100958		0.0724483	-20.7392		89.0586
PIAS4	0.0315119	50.5945	Upregulated	0.08947	-0.412658	-0.0507379	4.20548	0.488	299.247
STK40	0.0316044	1529.1	Upregulated	0.0366402	6343.65	0.0988862	904.439	-0.167585	1926.56
HBS1L	0.0316273	17.9568	Upregulated	0.0247907	19.0052	0.0799603	-45.2897	0.119935	133.8
ZYX	0.0316438	934.434	Upregulated	0.134775	-73.1653	0.0377227	2032.74	0.362969	3646.49
PPP4R1L	0.0317253	23.7297	Upregulated	0.0387079	2.24354	0.0822347	95.5591	-0.203168	44.6575
ARPIN	0.0317429	99.3657	Upregulated	0.120509			28.5003		269.476
KPNA4	0.0318025	98.8915	Upregulated	0.0204779	211.31	0.0092585	176.646	0.232702	205.13
HTATIP2	0.0318218	101.818	Upregulated	0.00827509	273.531	0.0300798	84.5667	-0.0306875	252.802
RNASE4	0.0318218	2.75383	Upregulated	0.182622	12.9331		0.279046	-0.142121	0.516484
UBE2L3	0.0318423	180.757	Upregulated	0.0163557	228.237	-0.015737	-39.0401	0.503935	894.842
ARHGDIB	0.0318466	4850.69	Upregulated	0.0272682	14606.8	-0.00144823	1067.87	-0.129152	13429.5
TSSC4	0.0320044	212.382	Upregulated	0.0136708	463.904	-0.0143969	16.2156	0.138782	794.035
KLF6	0.0320336	77.4757	Upregulated	0.00691413	626.217	0.00865212	862.055	0.0174998	-1023.45
C17orf99	0.0320712	1.65385	Upregulated	0.0186054	-4.77197	-0.0282011	10.4226	-0.159361	4.44139
LGALS12	0.0320712	66.2879	Upregulated	0.152523	43.1448	-0.0844722	-56.278	-0.569877	411.363
RABEP2	0.0320712	20.4339	Upregulated	-0.0248277	-235.754	0.138079	-62.6372	0.0850496	420.797
TTC36	0.0320712	0.224176	Upregulated	0.15551	0.406207	-0.00818316	-0.0700152		0.637363
USP19	0.0320712	43.2848	Upregulated	0.00303896	147.273	0.0374455	68.5353	0.575328
LIN7B	0.0321413	6.55174	Upregulated	-0.00689334	-1.98867	-0.0419745	1.85134	0.564397	38.9322
PFKFB3	0.0321714	40.9106	Upregulated	0.101037	118.069	0.0846758	85.0715	0.22902	41.9084
ZFAND3	0.0321748	120.305	Upregulated	0.108389	34.9635	0.00252427	309.526	-0.151732	377.383
ACVRL1	0.0322089	5.33974	Upregulated	0.0306616	20.9983	0.0256505	-0.852867	0.261635	11.5751
ANP32A	0.0322122	196.906	Upregulated	0.0383434	99.4315	0.0610369	150.577	-0.0130672	931.339
BANF1	0.0322214	132.261	Upregulated	-0.092159	-130.031	0.0108475	-55.8858	0.592382	978.971
NEDD8	0.0322214	752.751	Upregulated	-0.00381606	3359.39		-1.23694	-0.0817543	405.69
PRMT5	0.0322235	19.8972	Upregulated	0.0203774	24.2665	0.056283	-11.8777	0.0552185	106.863
CAPN1	0.0322734	422.511	Upregulated	0.0379993	18.7404	-0.0284683	227.692	0.621522	2288.01
RNF10	0.0323115	244.786	Upregulated	0.101322	438.883	0.11045	2161.42	0.0088386	-1131.81
TOR1B	0.0323961	159.13	Upregulated	0.0548758	3.86843	0.14002	-10.2456	0.164347	960.799
STK10	0.0323997	344.144	Upregulated	0.010328	989.612	0.0753547	730.672	0.349792
CDK2AP2	0.0324089	209.498	Upregulated	-0.0154892	410.246	0.0540025	-57.0025	0.504856	903.203
LYPD1	0.0324089	0.988188	Upregulated	0.0801313	4.60511	-0.0212306	-0.400812	-0.317595	1.98352
YY1AP1	0.0324438	132.954	Upregulated	0.0161202	120.882	-0.0322785	130.919	0.0125749	545.925
THAP7	0.0324623	67.911	Upregulated	-0.0568509	-32.5075	-0.107206	-12.0675	0.455775	451.749
ARHGAP10	0.0325192	5.29658	Upregulated	0.0560298	8.00207	-0.0077144	-38.4754	0.34184	61.8626
FOXN3	0.0325618	22.0241	Upregulated	0.0151984	138.533	0.0846065	127.317	0.0408716	-133.846
TAF5	0.0325766	8.39233	Upregulated	0.0305783	2.34072	0.0295727	-4.09031	0.834646	51.2088
MED8	0.0326209	43.9623	Upregulated	0.0123566	46.0143	0.0102798	-4.05784	0.290891	221.504
PRRG4	0.0326233	54.292	Upregulated	0.189552	159.881	0.00807982	273.654	-0.017548	-107.963
DGKD	0.0326838	176.925	Upregulated	0.0426285	220.43	0.0645987	-86.0644	0.262752	926.813
TNFAIP2	0.032704	2906.29	Upregulated	0.00895696	13176.6	0.00859527	2446.92	-0.0320389	1814.23
ATP6V1A	0.0327044	276.976	Upregulated	0.00457863	1813.91	0.0776396	434.662	0.0949949	-586.899
CTSO	0.0327663	21.3231	Upregulated	-0.0899468	133.789	0.0920405	-6.1933	0.157713	0.18315
TSG101	0.0328582	157.072	Upregulated	0.0393035	526.347	0.0308462	30.2019	-0.150517	385.962
PGAP6	0.0328802	850.433	Upregulated	0.0935998			230.83		2320.38
BROX	0.032911	30.7206	Upregulated	0.0371354	53.3253	0.0331322	129.431	-0.114674	1.61172
BCKDK	0.0329317	165.396	Upregulated	0.13401	101.785	0.00401394	38.8118	-0.257672	851.901
MIDN	0.0329466	637.726	Upregulated	0.0181045	2180.52	-0.0244617	908.524	0.106296	737.211
ACTR3	0.03296	571.591	Upregulated	-0.00780095	2166.67	0.0404731	524.817	0.240567	737.786
CHIT1	0.03296	11.606	Upregulated	0.201778	-3.64037	-0.036581	22.8483	-0.152746	50.4158
SCIMP	0.03296	74.8322	Upregulated			0.251434	-175.314		399.559
VWA5B2	0.03296	0.150059	Upregulated	0.0319357	-3.90932	-0.0390793	-0.144597		4.81136
FGF13	0.0330147	2.11188	Upregulated	0.0868293	20.6671	-0.0763183	9.74125	0.464937	-18.2125
PEX11G	0.0330496	3.9121	Upregulated	0.0761561	1.8112	-0.0530911	-0.508879	0.363346	21.7839
SAT1	0.0331716	1354.68	Upregulated	0.0245885	3089.55	0.0743856	166.532	-0.0107208	4871.92
ST3GAL4	0.0331866	52.6305	Upregulated	0.0656797	30.33	0.0269634	28.0183	-0.274875	257.617
HORMAD1	0.03319	6.38463	Upregulated	0.0120769	4.35671	0.196977	34.76	-0.0472954	-0.970696
SLC25A14	0.0332016	9.44214	Upregulated	0.0111389	16.9781	0.0418934	-1.45916	0.053452	41.0275
LRP1	0.0332195	194.859	Upregulated	0.0694776	-5.6642	0.105435	-981.75	0.0422902	2156.35
E2F4	0.0333689	169.96	Upregulated	0.0547259	-25.1923	-0.0261716	123.066	0.27692	921.582
CCNK	0.0334242	2.02929	Upregulated	-0.0824785	67.3163	0.0955978	6.79655	0.19995	-62.1502
DAD1	0.0334343	343.161	Upregulated	0.0122186	1044.51	-0.0383504	-15.8295	0.0487381	1030.26
RNASE2CP	0.0334343	7.24246	Upregulated	0.203322			-2.49975		24.0238
DGAT2	0.0334583	139.209	Upregulated	0.118789	424.161	-0.0525706	868.773	-0.325963	-457.421
GPATCH3	0.0335159	40.891	Upregulated	0.062767	12.6019	-0.0192828	-12.6799	0.649688	244.731
SLC7A6OS	0.0335159	14.5002	Upregulated	-0.0977013	92.3869	0.000726819	-38.3739	0.453156	32.6319
LOC100130000	0.0336296	69.0947	Upregulated		206.725	0.166819		0.392363
CHMP2B	0.0336537	28.3803	Upregulated	0.0152376	41.6051	0.0103903	39.3206	0.227688	89.1026
ANXA3	0.0336626	143.471	Upregulated	0.165701	584.394	0.0806583	114.548	-0.0196299	161.654
NDUFB3	0.0337598	413.42	Upregulated	0.0505426	2360.16	0.0241072	6.36022	-0.325865	114.255
NOTCH2	0.033789	307.238	Upregulated	0.0338817	874.623	0.163703	755.689	-0.0965294	213.013
NADK	0.0338358	873.082	Upregulated	0.0734398	623.717	0.0116877	1497.12	-0.217899	3117.79
C15orf24	0.0338487	337.253	Upregulated		674.253			0.252324
MS4A14	0.0338487	30.3731	Upregulated	-0.0372455	-16.1502	0.381079	-29.343	0.208568	227.179
MTLN	0.0338487	55.7478	Upregulated	-0.0568168			5.12633		162.174
WBP11	0.0338487	34.5018	Upregulated	-0.0272499	-46.1671	0.102969	-90.7159	0.635043	343.183
HCP5	0.0338501	30.4613	Upregulated	0.0299615	177.112	0.126346	1.16235	0.0800712	4.25641
HPYR1	0.0339254	0.27685	Upregulated	0.0752085	-0.869472	0.0523661	1.49061		0.635531
ZBTB7B	0.0340773	443.389	Upregulated	0.067612	34.2282	-0.00915245	635.915	-0.371046	1990.51
ELOVL1	0.0340799	179.754	Upregulated	0.0580166	48.1886	-0.0193871	17.861	0.54385	1011.89
POSTN	0.0341916	1.15902	Upregulated	0.0462984	5.57741	0.0435761	0.136986		-0.00915751
COPG2	0.0342178	18.8832	Upregulated	0.00808301	5.44175	0.0340441	-3.80974	0.3266	111.299
LENG1	0.0342505	1.60238	Upregulated	0.0265119	18.3539	0.057351	1.24962	0.335357	-10.4084
PABPN1	0.0342546	288.7	Upregulated	-0.085503	272.518		-37.3922	0.694849	1207.76
PUSL1	0.0342546	45.991	Upregulated	0.0476235	162.749	-0.0228416	-6.93709	-0.399669	120.509
SSR1	0.0342555	144.412	Upregulated	0.0400316	488.707	0.0267884	-96.001	0.135346	473.564
ZBP1	0.0342792	340.413	Upregulated	-0.00656196	76.7453	0.0974626	66.3942	0.192801	1899.06
CCDC124	0.0343372	83.1007	Upregulated	-0.00748063	-6.49233	-0.0400208	4.52055	0.528472	500.095
NCOA7	0.0343372	46.1013	Upregulated	-0.0233923	36.5002	0.137782	-30.342	0.606494	269.729
REEP3	0.0343547	2.33013	Upregulated	0.021684	13.1568	0.0811054	-35.828	0.613329	35.9359
CTSH	0.0343835	503.545	Upregulated	0.115078	765.411	0.0778802	-168.977	-0.0436839	2424.69
SEC14L4	0.0344198	4.18231	Upregulated	0.107866	-3.45134	0.00184704	31.4145	-0.325171	-2.65385
GMEB2	0.0344331	54.221	Upregulated	0.0238961	13.4647	-0.037936	30.7697	0.36177	280.744
TRAPPC1	0.0344331	234.087	Upregulated	0.0415568	92.8938	-0.158204	21.0604	0.312387	1290.37
UNC50	0.0344485	36.1803	Upregulated	0.0312907	67.556	0.0162202	-15.4211	0.0770529	164.822
MEG3	0.0344691	23.7602	Upregulated	0.0246947	-6.8439	-0.0305344	27.618	0.0932839	121.7
PROC	0.034494	8.14268	Upregulated	0.124094	33.9566	-0.101306	2.07965	-0.387959	13.185
ATP6V1B2	0.0345721	585.779	Upregulated	0.0688702	323.43	0.0299788	1710.54	0.0157343	1480.59
PPP1R12C	0.0346191	575.244	Upregulated	0.0290963	1804.59	-0.108623	76.4378	-0.241277	1570.76
RNF122	0.034665	135.209	Upregulated	0.0309882	636.111	-0.011405	27.5282	0.181818	147.412
MIR4685	0.0347373	1.33282	Upregulated				2.11618		0.549451
RLF	0.0347373	39.9867	Upregulated	0.0359221	288.96	0.00153939	51.4932	0.222287	-100.793
SETD1A	0.0347373	9.42709	Upregulated	-0.0302658	-80.3472	-0.0376631	-115.46	0.622344	251.815
SLC29A1	0.0347373	190.125	Upregulated	0.0579187	72.6797	0.0550703	-98.7646	-0.13392	1166.86
TRAPPC4	0.0347385	21.2568	Upregulated	-0.0733738	129.402	0.0845521	-2.64789	-0.0580189	0.833333
FAM110A	0.0347425	322.187	Upregulated	0.0166311	818.25	0.033683	-61.5023	0.101999	1176.22
FBXW7	0.0347425	8.47601	Upregulated	0.00801739	101.181	0.00795356	41.1852	0.184721	-91.7106
CDC34	0.0347481	312.732	Upregulated	0.0441736	162.993	-0.110387	794.716	-0.184021	918.93
TNFRSF10D	0.0347581	30.774	Upregulated	0.0114466	15.6728	0.0101727	-21.6839	0.325763	190.308
FBXL6	0.0347735	27.306	Upregulated	0.0540357	-37.6056	-0.10555	-1.42364	0.257723	202.659
GRPEL1	0.0347891	42.1235	Upregulated	0.0163984	13.4044	0.08178	-17.0223	0.579253	255.681
IFIT2	0.0348047	2830.18	Upregulated	0.0955049	2006.57	0.101201	-219.413	0.0482881	15193.7
MAP2K3	0.0348345	711.125	Upregulated	0.0782223	906.222	-0.0206254	1827.87	-0.0816624	1532.68
SERPING1	0.0348358	373.794	Upregulated	0.343521	-0.410797	0.196101	93.9016	0.0126564	2148.72
ZNF865	0.0348358	729.859	Upregulated	0.039691	3902.96	0.00755521	39.6565	-0.0348969	436.522
RAB27A	0.034841	112.326	Upregulated	0.102246	224.015	0.0293941	69.3359	0.140482	380.332
WIPF2	0.0348774	51.5278	Upregulated	0.00106532	108.268	0.0617475	131.482	0.101267	69.2527
TNPO3	0.0348981	44.4111	Upregulated	0.00646729	52.6998	0.0602721	72.5124	0.270114	140.918
ARMCX3	0.0349138	11.3906	Upregulated	0.0916904	-1.04847	0.054169	0.188737	0.703853	68.3535
MORC1	0.034976	0.452945	Upregulated	0.0099543	0.971433	-0.0242693	0.92897	0.19422	0.637363
AGAP3	0.035001	103.469	Upregulated	0.0456778	145.181	-0.0382519	-75.3643	0.0735684	550.914
CCR2	0.0350071	192.149	Upregulated	0.0961316	410.473	0.0683903	-199.362	0.128834	941.491
TFE3	0.0350192	233.674	Upregulated	0.0760601	160.312	-0.043507	57.1771	-0.0854089	1184.61
SDHAF2	0.0350896	48.2092	Upregulated	0.0034115	123.578	-0.00198427	-1.04972	0.426771	166.299
ABHD8	0.0351588	61.2438	Upregulated	0.0484323	252.234	-0.146147	3.76154	0.20252	111.363
KIF1C	0.0351678	181.55	Upregulated	0.0701816	632.332	0.00296712	-5.20091	0.0680368	462.029
ANO6	0.0351848	32.0728	Upregulated	0.0162827	67.1818	0.0332494	11.1025	0.535425	113.568
GTPBP2	0.0352457	163.215	Upregulated	0.0288641	-27.8739	0.0370045	26.4546	0.131918	980.509
CYTIP	0.0352674	389.475	Upregulated	0.0361074	1275.65	0.0314836	335.771	-0.162928	725.524
HAGH	0.0352735	295.767	Upregulated	0.123479	94.6335	-0.133157	844.818	0.092006	835.068
LOC644961	0.0353351	1810.43	Upregulated		5430.99	0.0783037		0.215011
MYO5A	0.0353545	46.6052	Upregulated	0.039005	132.611	0.139213	207.981	-0.232686	-60.9066
ZNF784	0.0353836	36.2467	Upregulated	0.0922887	95.7801	0.005666	-6.21715	0.143517	127.676
GEMIN2	0.0353993	2.41182	Upregulated	0.0203774	1.69232	0.0100531	-7.1243	0.130698	19.7418
ZNF281	0.0354854	35.6568	Upregulated	0.045367	176.083	-0.157329	167.058	0.118946	-129.207
SH3PXD2B	0.0355291	6.83422	Upregulated	0.0781291	2.26287	0.0619705	8.25165		23.5165
LRRN1	0.0355849	6.68181	Upregulated	0.0108603	11.2049	0.0881935	30.5413	0.0294696	-1.78388
NINJ2	0.0355867	51.7141	Upregulated	0.136423	101.923	-0.0516898	201.623	-0.249409	6.90293
EPHB2	0.0356258	2.91033	Upregulated	0.100484	2.83813	-0.0283141	-47.6454	0.0853377	62.1117
MYL11	0.0356258	4.53199	Upregulated	-0.042641			0.0598681		13.5788
PLEKHG6	0.0356258	3.15108	Upregulated	0.0749004	-5.47055	-0.0296964	0.859462	-0.225441	23.6978
CHCHD3	0.0356521	16.143	Upregulated	0.00539191	12.3259	0.0564755	-38.6489	0.0971351	123.022
SLC11A1	0.0356707	1182.38	Upregulated	0.118771	266.873	-0.0653935	1812.57	-0.107247	5014.9
IFNGR1	0.0356916	430.964	Upregulated	0.0871172	1902.94	-0.0317378	484.012	-0.235917	199.011
ZNF622	0.0356916	61.6895	Upregulated	-0.0331571	104.424	0.0177669	-9.36834	0.423046	274.674
MTCH1	0.0357263	435.15	Upregulated	0.0355332	957.024	-0.0410476	109.689	-0.332674	1544.53
CD14	0.0357273	2411.77	Upregulated	0.132502	8537.79	0.000238653	-138.817	0.0816151	6071.42
IFI16	0.0357922	693.559	Upregulated	0.0334819	373.671	0.056954	-239.201	0.14828	4026.65
ABR	0.0357986	98.8405	Upregulated	0.0656584	640.008	-3.18385e-05	25.6753	0.271862	-72.978
RUNDC3A	0.0358266	120.102	Upregulated	0.1079	4.21379	0.0240129	210.625	-0.15274	505.795
SH2D5	0.0358391	0.820052	Upregulated	0.113323	3.02292	-0.0746303	1.16337	-0.178302	0.873626
WIPI2	0.0358902	163.017	Upregulated	0.0165928	255.079	0.0944555	99.6565	-0.392849	623.648
BEGAIN	0.0359057	43.4133	Upregulated	-0.0928438	108.042	-0.00890218	25.624	0.192603	126.723
FXYD6	0.0359463	10.3749	Upregulated	0.108068	26.0533	-0.0156512	-26.655	0.159615	62.5989
GIMAP4	0.0359699	740.053	Upregulated	0.0073261	1371.27	0.0126604	-28.2735	0.262614	3097.04
RNASEH2A	0.0359699	22.5376	Upregulated	0.0338656	22.0031	0.0166346	-13.0096	0.58484	125.597
EEPD1	0.0359772	75.5662	Upregulated	0.0587724	113.318	0.0320816	238.572	-0.100211	101.516
FNIP2	0.0359772	8.13539	Upregulated	0.0200658	55.2119	0.0756428	-4.09082	0.284204	-2.68864
SELE	0.0360125	0.188486	Upregulated	0.0363587	-0.939617	0.0635551	0.0806697		1.70147
SDF2	0.0360567	124.123	Upregulated	0.0267191	265.344	-0.028265	45.9523	-0.0694739	433.511
COX8A	0.0361777	495.558	Upregulated	-0.00614435	2255.5	0.0374774	8.29274	0.151651	709.375
P2RY2	0.036256	28.892	Upregulated	0.0829372	68.5725	0.101637	-50.1441	-0.189361	154.929
ATP6V1C1	0.0362617	55.4015	Upregulated	0.0971052	394.929	-0.00547894	29.0969	0.278549	-91.9872
ZBTB34	0.0362899	153.425	Upregulated	0.0901676	314.683	0.0113596	491.549	0.0164124	114.201
KIAA0040	0.0363381	100.229	Upregulated	0.0778578	432.922	0.00716523	304.534	0.034316	-136.201
INPP5A	0.0363465	45.7284	Upregulated	0.112367	81.7201	-0.0641486	68.1202	-0.419272	124.901
TMEM164	0.0363892	569.586	Upregulated	0.118112	724.864	-0.0641817	230.151	0.235516	2462.21
COL16A1	0.0364025	1.42532	Upregulated	0.0725719	6.51374	-0.0462689	0.155758	0.271886	1.58425
MAFK	0.0364347	33.5884	Upregulated	0.0526251	19.5297	0.0465212	-32.2659	0.746403	213.421
TCAP	0.0365142	15.2736	Upregulated	0.0105317	5.69297	-0.110126	2.00457	0.0929663	83.9505
TM9SF4	0.0365452	96.2738	Upregulated	0.0328428	126.461	0.129236	-63.1573	0.398427	513.778
ACSS3	0.0366014	0.712117	Upregulated	0.0772579	0.19798	0.000601968	8.72248		-5.43773
ULK1	0.0366248	358.503	Upregulated	0.0959983	324.359	-0.0316838	511.705	-0.120633	1315.01
AP3D1	0.0366568	170.066	Upregulated	0.00772875	94.6982	0.102984	-136.364	0.427306	1061.52
CLSTN3	0.0366769	76.8202	Upregulated	0.0690036	107.886	0.0158858	-38.2405	0.729452	390.462
LILRB3	0.0366931	1643.41	Upregulated	0.0736471	9806.72	0.0581212	22.3009	0.0829835	31.2143
VEZF1	0.0367741	56.6862	Upregulated	0.00676901	175.785	0.0510478	145.341	0.176729	18.7564
FCGR3A	0.0368572	6935.61	Upregulated		30096.7	0.0159512	1357.85	-0.144181	3223.68
ATP6V0B	0.0368809	838.422	Upregulated	0.0723462	941.951	-0.0576015	446.043	-0.255976	3642.78
MS4A4A	0.036915	38.4813	Upregulated	0.0278102	186.153	0.0923677	-4.73617	0.282833	49.0678
FAM131A	0.0369529	25.1139	Upregulated	0.0414769	17.4543	0.0166559	9.09285	-0.110359	124.189
DNMT1	0.0370282	13.5544	Upregulated	-0.0304869	-41.99	0.134841	-198.479	0.599297	321.092
TNFSF10	0.0370507	1046.48	Upregulated	0.0893688	924.228	0.0351947	146.176	-0.123665	5208.45
ST3GAL3	0.0370608	15.2143	Upregulated	0.0235386	-7.56116	0.0495579	-19.4962	0.182257	118.088
OAS1	0.0372796	793.275	Upregulated	0.0195756	151.096	0.30711	-270.331	0.216166	4878.34
ZDHHC2	0.0373124	129.489	Upregulated	0.0118183	109.081	-0.0834242	369.554	0.137531	298.233
MDM2	0.0373288	131.867	Upregulated	0.0328279	17.3187	0.0159943	339.945	-0.0250711	433.914
IL37	0.0373999	0.745281	Upregulated	0.0279334	3.26764	0.0353229	0.0365297		0.358974
ARG1	0.0374025	31.9817	Upregulated	0.266494	156.627	-0.00434671	39.4734	0.137916	-4.60989
CALM2	0.0374025	794.59	Upregulated	0.0317492	2859.68	0.0379637	5.59462	-0.121924	1902.32
FAM210A	0.0374025	3.20123	Upregulated	-0.0554798		0.120526	-14.3572		27.0971
NUP133-DT	0.0374025	0.354977	Upregulated				0.687976		0.021978
ACTRT3	0.0374573	0.528789	Upregulated	0.0981153		-0.0228636	0.51243		1.52747
ATL3	0.0374767	22.5412	Upregulated	0.0103352	30.2746	0.0864521	-201.662	0.0324362	306.505
SLC43A3	0.0375134	25.2147	Upregulated	0.0476465	8.38963	0.0760967	-19.7139	0.136934	162.352
SPG21	0.0375261	296.894	Upregulated	0.00542768	916.149	-0.03588	48.4211	0.0792358	816.745
PPP1R18	0.0375362	156.732	Upregulated	0.0582644	841.685	-0.0613138	98.6981	0.103068	-0.0897436
PHTF1	0.0375364	4.3078	Upregulated	0.112737	30.7927	0.099192	31.583	-0.0448039	-36.696
PPP6R1	0.0375756	324.589	Upregulated	0.116078	17.7061	0.0246301	121.729	-0.0808598	1808.04
XIAP	0.0375804	43.9989	Upregulated	0.0124043	121.69	0.0412662	33.4267	0.354597	108.469
RALY	0.0375921	496.961	Upregulated	0.0210207	37.6366	-0.0351881	111.179	0.341762	2832.62
NCLN	0.0376251	249.105	Upregulated	-0.013671	201.792	0.0127138	18.8803	0.109062	1273.85
B2M	0.0376296	4456.13	Upregulated	-0.00942765	18635.4	0.0701634	4212.39	-0.312859	3889.27
BMPR1B	0.0376296	0.234543	Upregulated	-0.00831584	-0.629372	0.0457026	1.4277		0.336996
PSMA7	0.0376296	346.894	Upregulated	-0.0132382	523.034	0.0292272	6.66667	0.0619539	1551.59
SNAPC2	0.0376296	52.3558	Upregulated	0.000108846	44.5728	-0.0745706	-5.75748	0.532992	274.861
PARL	0.0376467	35.2455	Upregulated	0.0320441	202.344	0.094858	-58.657	-0.0772321	67.7363
COMMD5	0.0376835	64.7709	Upregulated	0.0177442	75.1097	-0.00970492	3.54744	0.264583	309.696
DAPK2	0.0376835	187.021	Upregulated	0.116717	354.598	-0.0136963	247.096	-0.430968	520.758
ATXN7L3	0.0376912	169.831	Upregulated	0.0300679	-4.60636	0.0079604	100.166	0.532404	922.853
GAL3ST1	0.0378311	0.348467	Upregulated	0.0221359	-0.917845	0.0861389	-1.88229	0.420027	4.36264
PIM3	0.0378311	488.84	Upregulated	0.065915	2541.89	-0.0869172	226.686	-0.301549	164.789
LPCAT3	0.0378325	111.947	Upregulated	0.0560453	705.367	0.0594669	-7.58853	0.159845	-26.3736
CALD1	0.0379012	2.49604	Upregulated	0.0879883	4.94463	0.0206716	10.7971	0.479385	-1.35348
GNA13	0.0379049	115.94	Upregulated	0.0332618	330.238	-0.0374489	670.896	0.260519	-305.747
YBEY	0.0379564	22.6216	Upregulated	-0.00639945	45.2133	0.00979137	5.08422	0.0680969	85.3608
COG1	0.0379699	27.2669	Upregulated	0.0522429	69.5113	0.0620966	-38.1091	0.248079	131.837
CDK16	0.0379928	113.51	Upregulated	0.0412063	177.364	-0.0571342	4.45104	0.154856	499.108
STAC3	0.038053	94.808	Upregulated	0.0632215	315.259	-0.0213793	-17.8148	0.0254242	271.337
GIMAP8	0.0381063	302.317	Upregulated	0.00806824	135.318	0.0160598	-244.353	0.663896	1922.25
MYCT1	0.0381076	4.10676	Upregulated	0.123539	4.95219	-0.105675	8.21664	0.224933	11.2289
PSMB10	0.0381076	1608.97	Upregulated	-0.0134815	8385.66	-0.114503	39.3536	0.122024	1228.79
TMEM222	0.0381272	151.568	Upregulated	0.0236781	-27.3977	0.132677	36.9193	-0.451826	900.183
SPINT2	0.0381487	143.04	Upregulated	0.0913882	145.989	-0.131105	-34.3825	0.0572101	746.617
CUL7	0.0382906	22.871	Upregulated	-0.0217171	-14.4177	0.135281	-23.0061	0.382065	174.154
LPGAT1	0.0382906	329.775	Upregulated	0.0613268	1437.72	0.0231901	530.796	-0.34586	10.3901
PLD1	0.0382906	0.691361	Upregulated	0.111426	16.4223	-0.0393426	2.49315	-0.473032	-14.3663
SGMS2	0.0382918	14.4147	Upregulated	0.0896816	16.3387	0.0460589	-54.3019	-0.0818886	124.397
IFI35	0.0383067	401.21	Upregulated	0.0770012	110.363	0.0127397	-62.2933	0.308092	2358.79
SRP68	0.0384095	82.9428	Upregulated	-0.055469	-4.28283	0.19348	-110.524	0.684801	611.641
PHIP	0.0384241	33.2426	Upregulated	0.0165572	87.7048	0.063184	225.463	0.215865	-114.007
FMR1	0.038528	37.9558	Upregulated	0.0362908	61.6936	0.0829488	2.19838	0.286191	163.438
SH3KBP1	0.038546	111.215	Upregulated	0.0238013	238.065	0.0661632	55.0634	0.271658	373.799
CBX1	0.0385838	43.1484	Upregulated	0.0953055	249.654	0.00316872	-25.7829	-0.209252	35.13
CNDP2	0.0385838	132.958	Upregulated	0.0265004	-131.527	0.109717	-206.059	0.426864	1134.77
QPRT	0.0385921	6.69405	Upregulated	0.0165519	14.5984	-0.0408852	1.0624	0.203628	24.3242
ALDH2	0.0386427	208.063	Upregulated	0.130779	199.12	0.139855	25.4353	-0.098052	1023.65
COPB2	0.0386711	129.458	Upregulated	0.0152857	637.671	0.0572493	-83.6362	0.37816	222.262
SNTB1	0.0386711	23.4321	Upregulated	0.0373766	47.7172	0.0358885	-64.4886	0.680595	156.61
TMEM147	0.0386862	107.087	Upregulated	-0.0145612	241.54	-0.0376331	-24.1649	0.215657	424.984
SNF8	0.0387317	89.6578	Upregulated	-0.0442877	269.691	0.0271182	-6.6205	0.137523	274.756
PANX2	0.0387612	77.0617	Upregulated	0.109541	26.4057	-0.235417	232.297	-0.704797	204.498
C11orf68	0.0387946	157.996	Upregulated	0.0224744	-72.6945	0.0274438	11.6078	0.108872	1008.9
ITFG1	0.0387987	13.975	Upregulated	0.0660275	58.3228	-0.0569236	-35.3587	0.497508	60.3791
HSD17B10	0.0389336	103.782	Upregulated	-0.0529298	-41.3897	0.0237164	-17.0695	0.554995	680.623
RENBP	0.0390148	117.328	Upregulated	0.110129	6.89078	-0.00852888	10.1629	0.149469	686.665
[truncated: 1,162 more rows]
