# Supplementary material
Source: Research Square preprint supplement (doi:10.21203/rs.3.rs-8976053/v1)
Supplement: Supplementary file 14 [file d1b2ae0de8b1a580b8657b55.xlsx]

## Sheet: Sheet1
source	term_name	term_id	highlighted	adjusted_p_value	negative_log10_of_adjusted_p_value	term_size	query_size	intersection_size	effective_domain_size	intersections
GO:MF	protein binding	GO:0005515	TRUE	1.3654684832718703e-163	162.86471831947085	15123	6180	5366	20246	GZMK,RETN,MAFG,FAM110B,MMP8,MTARC1,GRB10,HK2,CAPNS2,APCDD1,IRAK3,CACNB2,ITM2A,IKZF3,TIMP2,PFKFB2,CKAP4,KLRB1,SH2D1A,OLFM4,STX17,PYHIN1,CD3G,DCAF16,TPST1,ZNF134,KLRG1,IL7R,HPR,CEACAM8,RPL9,RORA,KLHL20,FKBP5,KCNE1,ARL4C,PTX3,TSPAN4,CCT2,ERAP2,MGST1,NDST1,DAO,KLF12,CEACAM6,TSHZ3,FZD5,FCER1A,SIPA1L2,IGF1R,XPO1,TTC36,ATF7IP2,CHIT1,CLEC3B,HLA-DPB1,VCAN,ARG1,CRYGS,SLC28A3,SPINK2,S100A12,LCN2,PNPLA2,EVL,…
PARP10	GLDC	MICALL2	RALY	ATP5MC3	IAH1	CPSF4	ALDOA	PLAAT4	TMEM115	NEK2	CIB1	SPHK2	DHRS1	PRMT1	MT-ND1	RLN2	RPL27	PCED1A	SNX8	CCDC9	RTCB	ACOT8	COA8	OLFML2B	TOR2A	ITIH1	BRSK2	PCP2	GSDMD	AP2M1	FAM81B	GPC1	NWD1	WDR83	ARHGAP33	IGHMBP2	SPMIP5	COMMD6	IMP4	KIAA0319L	GRIA4	TIMM10	ZFAND2A	TOMM40	CYP4F12	VAT1	MAD2L1BP	NTM	C6ORF226
GO:MF	binding	GO:0005488	FALSE	2.820808093331665e-37	36.549626458985394	18498	6180	5878	20246	GZMK,RETN,MAFG,FAM110B,TDRD9,MMP8,MTARC1,GRB10,HK2,CAPNS2,APCDD1,GPR171,IRAK3,CACNB2,ITM2A,IKZF3,TIMP2,PFKFB2,CKAP4,KLRB1,SH2D1A,OLFM4,STX17,PYHIN1,CD3G,DCAF16,TPST1,ZNF134,KLRG1,IL7R,HPR,CEACAM8,RPL9,RORA,PLOD2,KLHL20,FKBP5,KCNE1,ARL4C,PTX3,TSPAN4,CCT2,ERAP2,MGST1,NDST1,DAO,KLF12,CEACAM6,TSHZ3,FZD5,FCER1A,SIPA1L2,LTB4R,IGF1R,XPO1,TTC36,ATF7IP2,CHIT1,ELAC1,CLEC3B,HLA-DPB1,VCAN,ARG1,CRYGS,SLC28A3,…
1	MDP1	WDR18	CYC1	RPL36AL	PAQR7	ATP5MC2	BATF3	REX1BD	CAMK1	RPS28	RABL6	DDX49	CHRNA5	STUB1	MVD	CIAO2B	OST4	RNU6-516P	NDUFS8	FIBP	EDF1	TXNRD2	ANTKMT	SHB	RPS29	AKR7A2	MRPL57	CCDC85B	NAA38	ERGIC3	DBX1	CUEDC2	EXOSC5	BAX	MRPL11	NICOL1	MFSD12	RPSA	PARD6A	PPIA	BGLAP	FAAP20	PSPN	EFNB2	RAB25	SYT1	ROGDI	R3HCC1	POLR2I
GO:MF	catalytic activity	GO:0003824	FALSE	5.684922661722144e-34	33.24527543912326	6817	6180	2474	20246	GZMK,TDRD9,MMP8,MTARC1,HK2,CAPNS2,IRAK3,TIMP2,PFKFB2,TPST1,HPR,PLOD2,KLHL20,FKBP5,ARL4C,CCT2,ERAP2,MGST1,NDST1,DAO,PLBD1,SIPA1L2,IGF1R,CHIT1,ELAC1,VCAN,ARG1,SPINK2,PNPLA2,PTS,LTF,PRKAB2,HP,TNIK,RNF144B,ASPH,RNF175,ABCD2,TRIM71,C1RL,TNS2,ALOX15B,RNASE1,NME7,NDUFS4,PPP1R17,CDK5R1,ELANE,OTUD3,MAP3K15,PGM5,RAB13,TGFBR3,ABAT,CHST13,OSGEPL1,THEM4,OLAH,GALNT11,ST3GAL6,KIF3C,MAP3K21,PPM1K,RRAGD,CES1,MPO,…
GO:MF	enzyme binding	GO:0019899	FALSE	1.2182000349543737e-24	23.914281392373187	2107	6180	864	20246	IRAK3,IKZF3,TIMP2,PFKFB2,STX17,PYHIN1,CCT2,FZD5,XPO1,GADD45A,SYTL2,PRKAB2,RNF144B,TNS2,CDK5R1,ELANE,CEBPA,GP6,SORT1,ABAT,IQCB1,MAML1,RRAGD,SH2B2,CLEC12B,TRIB2,FGD4,PRKACB,HINT1,SKAP1,RHOH,NRG1,SIRPA,EPHA4,CYFIP1,FCRL3,IRS2,THBS1,MAPK14,ITGB3,HSP90AB1,CENPJ,SLPI,CLU,IL1R1,IRGM,SPHK1,CCDC50,PZP,RPS7,GAB2,ABCD1,F2RL1,SIAH2,DOCK4,NAIP,DPP4,CD177,MTMR3,PTPRK,ABCB1,JDP2,CTSG,TFEB,NACC1,DYM,GNB1,LAMP1,G…
GO:MF	small molecule binding	GO:0036094	FALSE	2.3888590981629485e-23	22.621809465442652	6577	6180	2332	20246	TDRD9,MMP8,MTARC1,HK2,CAPNS2,IRAK3,IKZF3,TIMP2,PFKFB2,ZNF134,RORA,PLOD2,ARL4C,CCT2,ERAP2,DAO,KLF12,TSHZ3,LTB4R,IGF1R,ELAC1,CLEC3B,VCAN,ARG1,S100A12,LCN2,PTS,HSPH1,TCN1,ZNF141,PLTP,LTF,SYTL2,CSRP3,TNIK,RNF144B,ASPH,RNF175,ABCD2,TRIM71,MIS18A,TNS2,ALOX15B,NME7,CDK5R1,MAP3K15,PGM5,TRPM2,PLEKHA1,RAB13,ABAT,OSGEPL1,WIPI1,ZNF527,GALNT11,ZNF22,KIF3C,MAP3K21,CLEC4E,PPM1K,RRAGD,MPO,ABCC2,CYBRD1,ITGA2B,REP…
GO:MF	ion binding	GO:0043167	FALSE	4.242370423366155e-21	20.37239141366001	6377	6180	2253	20246	TDRD9,MMP8,MTARC1,HK2,CAPNS2,IRAK3,IKZF3,TIMP2,PFKFB2,ZNF134,RORA,PLOD2,ARL4C,CCT2,ERAP2,DAO,KLF12,TSHZ3,IGF1R,ELAC1,CLEC3B,VCAN,ARG1,S100A12,LCN2,PTS,HSPH1,ZNF141,PLTP,LTF,SYTL2,CSRP3,TNIK,RNF144B,ASPH,RNF175,ABCD2,TRIM71,MIS18A,TNS2,ALOX15B,NME7,CDK5R1,MAP3K15,PGM5,TRPM2,PLEKHA1,RAB13,ABAT,OSGEPL1,WIPI1,ZNF527,GALNT11,ZNF22,KIF3C,MAP3K21,CLEC4E,PPM1K,RRAGD,MPO,ABCC2,CYBRD1,ITGA2B,REPS2,EGF,TRIB…
GO:MF	protein-macromolecule adaptor activity	GO:0030674	TRUE	3.36182257246019e-19	18.473425211132966	1034	6180	458	20246	GRB10,SH2D1A,STX17,CD3G,FKBP5,ATF7IP2,HAX1,MIS18A,ELANE,WIPI1,IQCB1,MAML1,SH2B2,KDM7A,DDX17,NRG1,IRS2,ANKRD9,CENPJ,HIP1,IRGM,GAB2,SIAH2,SCAI,MED21,INSC,GNB1,CNKSR1,TAF12,HERPUD1,SRCAP,CTBP2,TADA3,CRADD,TP53,MTA3,CD3E,MIER1,CUL3,PPP4R2,JAZF1,ARID1A,CBX5,HDAC3,NAPG,MPP7,TNRC6A,VTI1A,MYCBP,ATN1,YTHDF3,PHF2,AP1G2,HNRNPC,SHARPIN,YTHDC1,SAP30,ARHGAP26,TRRAP,TRIM24,HMGA1,TSG101,USP21,SETD5,MECP2,CREG1,Z…
GO:MF	molecular adaptor activity	GO:0060090	FALSE	1.779202529345774e-16	15.749774612696884	1212	6180	512	20246	GRB10,SH2D1A,STX17,CD3G,FKBP5,ATF7IP2,DLGAP3,HAX1,MIS18A,ELANE,WIPI1,IQCB1,MAML1,RRAGD,SH2B2,ITGA2B,KDM7A,DDX17,PGLYRP1,NRG1,LTBP1,IRS2,ANKRD9,CENPJ,HIP1,IFI27,IRGM,GAB2,SIAH2,SCAI,MTMR3,MED21,COL4A4,INSC,GNB1,PSMD4,CNKSR1,TAF12,HERPUD1,SRCAP,CTBP2,LAMTOR2,MBD2,TADA3,CRADD,TP53,MTA3,CD3E,MIER1,CUL3,PPP4R2,JAZF1,ARID1A,CBX5,HDAC3,NAPG,MPP7,TNRC6A,VTI1A,MYCBP,ATN1,YTHDF3,PHF2,AP1G2,HNRNPC,SHARPIN,Y…
GO:MF	nucleoside phosphate binding	GO:1901265	FALSE	4.7180864953888715e-16	15.326234101575526	2424	6180	930	20246	TDRD9,HK2,IRAK3,PFKFB2,ARL4C,CCT2,DAO,LTB4R,IGF1R,HSPH1,TNIK,ABCD2,NME7,MAP3K15,TRPM2,RAB13,KIF3C,MAP3K21,RRAGD,ABCC2,EGF,TRIB2,FGD4,PRKACB,HINT1,MAOA,SRPK1,DDX17,GIMAP5,RHOH,EPHA4,TUBE1,PRIM1,MAPK14,HSP90AB1,AATK,BDH2,GUF1,ATP8B4,ABCA13,AK3,ATP7B,IRGM,NUAK1,PFKFB4,SPHK1,KIF21A,RASGEF1B,RAB30,ABCD1,EEF1B2,DOCK4,NAIP,PDK4,RAB36,G6PD,DDX60L,RRAS2,ABCB1,GIMAP2,SRXN1,CMPK2,PDE6H,RYR1,HK3,BMX,TOR1A,DG…
GO:MF	nucleotide binding	GO:0000166	FALSE	1.5200944835477982e-15	14.818129417049859	2406	6180	921	20246	TDRD9,HK2,IRAK3,PFKFB2,ARL4C,CCT2,DAO,LTB4R,IGF1R,HSPH1,TNIK,ABCD2,NME7,MAP3K15,RAB13,KIF3C,MAP3K21,RRAGD,ABCC2,EGF,TRIB2,FGD4,PRKACB,HINT1,MAOA,SRPK1,DDX17,GIMAP5,RHOH,EPHA4,TUBE1,PRIM1,MAPK14,HSP90AB1,AATK,BDH2,GUF1,ATP8B4,ABCA13,AK3,ATP7B,IRGM,NUAK1,PFKFB4,SPHK1,KIF21A,RASGEF1B,RAB30,ABCD1,EEF1B2,DOCK4,NAIP,PDK4,RAB36,G6PD,DDX60L,RRAS2,ABCB1,GIMAP2,SRXN1,CMPK2,PDE6H,RYR1,HK3,BMX,TOR1A,DGKA,ACT…
GO:MF	heterocyclic compound binding	GO:1901363	FALSE	2.446489991997522e-15	14.61145655649474	2558	6180	971	20246	TDRD9,MTARC1,HK2,IRAK3,PFKFB2,PLOD2,ARL4C,CCT2,DAO,LTB4R,IGF1R,LCN2,HSPH1,TCN1,TNIK,ABCD2,NME7,MAP3K15,TRPM2,RAB13,ABAT,KIF3C,MAP3K21,RRAGD,ABCC2,EGF,TRIB2,FGD4,PRKACB,HINT1,MAOA,SRPK1,DDX17,GIMAP5,RHOH,ALAS2,EPHA4,TUBE1,PRIM1,FOLR3,MAPK14,HSP90AB1,AATK,BDH2,GUF1,ATP8B4,ABCA13,AK3,ATP7B,IRGM,NUAK1,PFKFB4,SPHK1,KIF21A,RASGEF1B,RAB30,ABCD1,EEF1B2,DOCK4,NAIP,PDK4,RAB36,G6PD,DDX60L,TKTL1,RRAS2,ABCB1,…
GO:MF	anion binding	GO:0043168	FALSE	3.0807240231907102e-15	14.511347204822842	2685	6180	1013	20246	TDRD9,MTARC1,HK2,IRAK3,PFKFB2,PLOD2,ARL4C,CCT2,DAO,IGF1R,LCN2,HSPH1,PLTP,SYTL2,TNIK,ABCD2,NME7,MAP3K15,TRPM2,PLEKHA1,RAB13,ABAT,WIPI1,KIF3C,MAP3K21,RRAGD,ABCC2,EGF,TRIB2,FGD4,PRKACB,MAOA,SRPK1,DDX17,GIMAP5,RHOH,ALAS2,EPHA4,TUBE1,FOLR3,MAPK14,SELP,HSP90AB1,AATK,GUF1,ATP8B4,ABCA13,HIP1,AK3,ATP7B,IRGM,NUAK1,PFKFB4,SPHK1,KIF21A,RASGEF1B,RAB30,GAB2,ABCD1,EEF1B2,DOCK4,NAIP,NCEH1,PDK4,RAB36,DDX60L,TKTL1…
GO:MF	identical protein binding	GO:0042802	FALSE	3.572771956369304e-15	14.446994703151349	2182	6180	843	20246	MAFG,GRB10,APCDD1,IRAK3,IKZF3,CD3G,TPST1,PTX3,DAO,CEACAM6,IGF1R,S100A12,LCN2,PTS,GADD45A,CSRP3,OLFML2A,ABCD2,MIS18A,TNS2,DEFA4,CEBPA,ABAT,MAP3K21,AGTRAP,XCL1,CYBRD1,SH2B2,ITGA2B,MMP9,SHTN1,SYP,TCF4,S100B,EPHA4,HTRA1,SMIM3,TLR2,OLR1,THBS1,TIGIT,ITGB3,HSP90AB1,GZMA,CENPJ,GEN1,CD3D,FAM118A,INHBA,HIP1,IFI27,SLAMF7,SOX6,AQP1,PADI4,MCEMP1,ABCD1,S100P,RNF135,DPP4,G6PD,MS4A1,CEBPE,EPDR1,FECH,GP1BB,GIMAP2…
GO:MF	electron transfer activity	GO:0009055	FALSE	3.673293531115486e-14	13.43494436600532	114	6180	78	20246	ASPH,NDUFS4,NDUFA4,NDUFB1,NDUFA1,UQCR11,NDUFB4,SURF1,NDUFA2,NDUFB3,COX7B,UQCR10,COX5A,UQCRFS1,NDUFB6,GSR,HSD17B6,DEGS1,ND5,COX8A,NCF2,NQO2,SDHB,COX5B,COX3,SDHD,COX6B1,CYBA,COX2,ND4,GLRX2,NDUFB5,NDUFA8,NDUFS6,NDUFC1,COX7A2L,SDHC,NDUFS2,COX1,STEAP4,NDUFC2,HAAO,NDUFB10,ND2,CYTB,SRD5A1,CYBB,NDUFV2,DHRS3,NDUFB7,CYB5A,NDUFA9,SDHA,NDUFS7,CYP1A2,AIFM2,CIAPIN1,NDUFA12,AKR1B1,ND4L,PHGDH,NDUFS5,COX4I1,NDUFB…
GO:MF	purine nucleotide binding	GO:0017076	FALSE	2.7721797453181956e-13	12.557178613934314	2241	6180	852	20246	TDRD9,HK2,IRAK3,PFKFB2,ARL4C,CCT2,IGF1R,HSPH1,TNIK,ABCD2,NME7,MAP3K15,RAB13,KIF3C,MAP3K21,RRAGD,ABCC2,EGF,TRIB2,FGD4,PRKACB,SRPK1,DDX17,GIMAP5,RHOH,EPHA4,TUBE1,MAPK14,HSP90AB1,AATK,BDH2,GUF1,ATP8B4,ABCA13,AK3,ATP7B,IRGM,NUAK1,PFKFB4,SPHK1,KIF21A,RASGEF1B,RAB30,ABCD1,EEF1B2,DOCK4,NAIP,PDK4,RAB36,G6PD,DDX60L,RRAS2,ABCB1,GIMAP2,SRXN1,CMPK2,PDE6H,RYR1,HK3,BMX,TOR1A,DGKA,ACTR2,GSK3A,PAPOLA,UBE2A,ACTR3…
GO:MF	oxidoreduction-driven active transmembrane transporter activity	GO:0015453	FALSE	3.566179072277818e-13	12.447796852930292	66	6180	52	20246	NDUFS4,CYBRD1,NDUFA4,NDUFB1,NDUFA1,NDUFB4,SURF1,NDUFA2,NDUFB3,COX7B,UQCR10,COX5A,UQCRFS1,NDUFB6,ND5,COX8A,COX5B,COX3,COX6B1,COX2,ND4,NDUFB5,NDUFA8,NDUFS6,NDUFC1,COX7A2L,NDUFS2,COX1,CYB561D2,NDUFC2,NDUFB10,ND2,CYTB,NDUFV2,NDUFB7,CYB5A,NDUFA9,NDUFS7,NDUFA12,ND4L,NDUFS5,COX4I1,NDUFB2,NDUFS3,UQCRC1,CYC1,NDUFS8,UQCRH,NDUFV1,NDUFB9,MT-ND3,MT-ND1
GO:MF	catalytic activity, acting on a protein	GO:0140096	FALSE	8.432921843202094e-13	12.074021924720133	2849	6180	1052	20246	GZMK,MMP8,CAPNS2,IRAK3,TIMP2,TPST1,HPR,PLOD2,KLHL20,FKBP5,ERAP2,IGF1R,VCAN,SPINK2,LTF,PRKAB2,HP,TNIK,RNF144B,ASPH,RNF175,TRIM71,C1RL,TNS2,NME7,PPP1R17,CDK5R1,ELANE,OTUD3,MAP3K15,TGFBR3,GALNT11,MAP3K21,PPM1K,EGF,TRIB2,SERPINB2,KDM7A,PRKACB,PROS1,HINT1,SRPK1,MMP9,CTSD,FKBP9,FUT8,NRG1,ZDHHC19,EPHA4,HTRA1,LTBP1,THBS1,DUSP5,MAPK14,ITGB3,AZU1,HSP90AB1,GZMA,HECW2,NMT2,PPP1R26,SLPI,AATK,PTPN4,RPS27L,F13A…
GO:MF	transferase activity	GO:0016740	FALSE	1.0587770967384868e-11	10.97519546184337	2594	6180	960	20246	HK2,IRAK3,PFKFB2,TPST1,KLHL20,MGST1,NDST1,IGF1R,PNPLA2,LTF,PRKAB2,TNIK,RNF144B,RNF175,TRIM71,NME7,CDK5R1,MAP3K15,TGFBR3,ABAT,CHST13,OSGEPL1,GALNT11,ST3GAL6,MAP3K21,EGF,TRIB2,PRKACB,CRAT,SRPK1,RHOH,FUT8,NRG1,ALAS2,ZDHHC19,EPHA4,PRIM1,LTBP1,IRS2,B4GALT5,MAPK14,HSP90AB1,MBOAT2,HECW2,NMT2,AATK,F13A1,AK3,GBE1,IRGM,NUAK1,PFKFB4,SPHK1,NSUN7,TMT1B,MPP1,RPS7,SIAH2,RNF135,PDK4,TKTL1,MED21,CMPK2,HK3,BMX,B3G…
GO:MF	purine ribonucleotide binding	GO:0032555	FALSE	5.7493609387053146e-11	10.240380425956998	2147	6180	806	20246	TDRD9,HK2,IRAK3,PFKFB2,ARL4C,CCT2,IGF1R,HSPH1,TNIK,ABCD2,NME7,MAP3K15,RAB13,KIF3C,MAP3K21,RRAGD,ABCC2,EGF,TRIB2,FGD4,PRKACB,SRPK1,DDX17,GIMAP5,RHOH,EPHA4,TUBE1,MAPK14,HSP90AB1,AATK,GUF1,ATP8B4,ABCA13,AK3,ATP7B,IRGM,NUAK1,PFKFB4,SPHK1,KIF21A,RASGEF1B,RAB30,ABCD1,EEF1B2,DOCK4,NAIP,PDK4,RAB36,DDX60L,RRAS2,ABCB1,GIMAP2,SRXN1,CMPK2,PDE6H,RYR1,HK3,BMX,TOR1A,DGKA,ACTR2,GSK3A,PAPOLA,UBE2A,ACTR3,SRCAP,DNH…
GO:MF	ribonucleotide binding	GO:0032553	FALSE	7.375207752334649e-11	10.132225741529902	2164	6180	811	20246	TDRD9,HK2,IRAK3,PFKFB2,ARL4C,CCT2,IGF1R,HSPH1,TNIK,ABCD2,NME7,MAP3K15,RAB13,KIF3C,MAP3K21,RRAGD,ABCC2,EGF,TRIB2,FGD4,PRKACB,SRPK1,DDX17,GIMAP5,RHOH,EPHA4,TUBE1,PRIM1,MAPK14,HSP90AB1,AATK,GUF1,ATP8B4,ABCA13,AK3,ATP7B,IRGM,NUAK1,PFKFB4,SPHK1,KIF21A,RASGEF1B,RAB30,ABCD1,EEF1B2,DOCK4,NAIP,PDK4,RAB36,DDX60L,RRAS2,ABCB1,GIMAP2,SRXN1,CMPK2,PDE6H,RYR1,HK3,BMX,TOR1A,DGKA,ACTR2,GSK3A,PAPOLA,UBE2A,ACTR3,SRC…
GO:MF	carbohydrate derivative binding	GO:0097367	FALSE	1.4227854139666508e-10	9.846860595739749	2536	6180	933	20246	TDRD9,HK2,IRAK3,PFKFB2,ARL4C,CCT2,IGF1R,CHIT1,CLEC3B,VCAN,BPI,HSPH1,LTF,TNIK,ABCD2,NME7,ELANE,MAP3K15,FGF9,TRPM2,RAB13,TGFBR3,CD1C,KIF3C,MAP3K21,CLEC4E,RRAGD,MPO,ABCC2,EGF,TRIB2,FGD4,PRKACB,SRPK1,DDX17,CAMP,GIMAP5,PGLYRP1,RHOH,EPHA4,TUBE1,PRIM1,TLR2,THBS1,MAPK14,SELP,AZU1,HSP90AB1,AATK,GUF1,ATP8B4,ABCA13,RNASE3,AK3,HPSE,ATP7B,IRGM,NUAK1,PFKFB4,SPHK1,KIF21A,RASGEF1B,RAB30,ABCD1,EEF1B2,DOCK4,NAIP,P…
GO:MF	active monoatomic ion transmembrane transporter activity	GO:0022853	FALSE	2.289347468205385e-10	9.640288286804758	118	6180	74	20246	NDUFS4,NDUFA4,ATP7B,NDUFB1,ATP6V1D,NDUFA1,NDUFB4,SURF1,NDUFA2,NDUFB3,COX7B,UQCR10,COX5A,UQCRFS1,ATP6V0E1,NDUFB6,ATP7A,ATP6V1C1,ND5,COX8A,ATP6V0C,COX5B,ATP6V1E1,COX3,COX6B1,COX2,ATP13A2,ND4,ATP13A1,NDUFB5,ATP6V1A,NDUFA8,NDUFS6,NDUFC1,COX7A2L,ATP6V0A1,NDUFS2,COX1,ATP6V1G1,TCIRG1,NDUFC2,ATP6V0E2,NDUFB10,ATP6V1F,ND2,CYTB,NDUFV2,ATP6V1B1,NDUFB7,ATP6V1G2,CYB5A,ATP1B1,ATP6V0D1,NDUFA9,ATP1A4,ATP6V1H,NDUF…
GO:MF	purine ribonucleoside triphosphate binding	GO:0035639	FALSE	3.262383754833177e-10	9.486464954146818	2087	6180	781	20246	TDRD9,HK2,IRAK3,PFKFB2,ARL4C,CCT2,IGF1R,HSPH1,TNIK,ABCD2,NME7,MAP3K15,RAB13,KIF3C,MAP3K21,RRAGD,ABCC2,EGF,TRIB2,FGD4,PRKACB,SRPK1,DDX17,GIMAP5,RHOH,EPHA4,TUBE1,MAPK14,HSP90AB1,AATK,GUF1,ATP8B4,ABCA13,AK3,ATP7B,IRGM,NUAK1,PFKFB4,SPHK1,KIF21A,RASGEF1B,RAB30,ABCD1,EEF1B2,DOCK4,NAIP,PDK4,RAB36,DDX60L,RRAS2,ABCB1,GIMAP2,SRXN1,CMPK2,RYR1,HK3,BMX,TOR1A,DGKA,ACTR2,GSK3A,PAPOLA,UBE2A,ACTR3,SRCAP,DNHD1,MAR…
GO:MF	oxidoreductase activity	GO:0016491	FALSE	5.192681281531652e-10	9.28460833288731	759	6180	322	20246	MTARC1,PLOD2,MGST1,DAO,ASPH,ALOX15B,NDUFS4,MPO,CLIC4,CYBRD1,KDM7A,CRAT,HSD3B7,MAOA,PTGR3,CYP1B1,TBXAS1,HSP90AB1,NDUFA4,BDH2,OXNAD1,PTGS1,G6PD,AKR1C3,SRXN1,NDUFB1,CTBP2,COX6A1,TXNL1,CYB5R3,GMPR2,NDUFA1,NDUFB4,SURF1,PRDX6,NDUFA2,KDM4A,COX7A2,NDUFB3,GSTM2,COX7B,UQCR10,PHF2,MGST2,PDGFB,COX5A,UQCRFS1,NDUFB6,RDH13,GSR,HSD17B6,CYP27A1,DEGS1,IMPDH1,HTATIP2,CLIC1,ALOX5,TXN,SDR39U1,ND5,CYB5R4,TMX1,TXNDC5,C…
GO:MF	kinase activity	GO:0016301	FALSE	5.129552636323038e-9	8.28992050936153	1000	6180	403	20246	HK2,IRAK3,PFKFB2,IGF1R,LTF,PRKAB2,TNIK,NME7,CDK5R1,MAP3K15,TGFBR3,MAP3K21,EGF,TRIB2,PRKACB,SRPK1,RHOH,NRG1,EPHA4,LTBP1,IRS2,MAPK14,HSP90AB1,AATK,AK3,IRGM,NUAK1,PFKFB4,SPHK1,MPP1,PDK4,CMPK2,HK3,BMX,DGKA,GSK3A,CNKSR1,CALM2,MARK3,CDK7,YWHAB,PIK3C3,SCYL2,ANKK1,MINK1,CCNH,CHUK,GIT2,APC,MAP3K3,ROCK1,TAOK3,MOB1A,CASP3,PRKAR1B,SGMS1,TRRAP,TRIM24,PPM1D,CAD,TGFBR1,DAZAP2,CDKN2D,HGS,STK19,RHEB,MAPK11,MAP3K5…
GO:MF	protein-containing complex binding	GO:0044877	FALSE	1.073203123088706e-8	7.969318072173954	1314	6180	510	20246	CACNB2,CD3G,KCNE1,PTX3,TSPAN4,FZD5,FCER1A,IGF1R,HLA-DPB1,PLTP,PSTPIP2,CDK5R1,GP6,SORT1,TGFBR3,IQCB1,CD8A,ITGA2B,IFT56,DDX17,MMP9,SHTN1,NRG1,TLR2,CYFIP1,THBS1,SELP,ITGB3,HSP90AB1,NDUFA4,ACTR6,CLU,GUF1,INHBA,S1PR3,HIP1,EIF5A2,RNF135,ITGB5,CD177,MS4A1,CEBPE,PSMF1,MYC,UBLCP1,GNB1,ACTR2,ACTR3,CTBP2,EIF1,NACC2,ARPC2,MBD2,ARPC3,MARCKSL1,SLC34A1,SPTAN1,ERAL1,BRK1,PAFAH1B1,TP53,PLEC,MTA3,CD3E,CAPZA1,CHUK,…
GO:MF	adenyl nucleotide binding	GO:0030554	FALSE	1.9137760069635722e-8	7.718108894475772	1651	6180	623	20246	TDRD9,HK2,IRAK3,PFKFB2,CCT2,IGF1R,HSPH1,TNIK,ABCD2,NME7,MAP3K15,KIF3C,MAP3K21,ABCC2,TRIB2,PRKACB,SRPK1,DDX17,EPHA4,MAPK14,HSP90AB1,AATK,BDH2,ATP8B4,ABCA13,AK3,ATP7B,NUAK1,PFKFB4,SPHK1,KIF21A,ABCD1,NAIP,PDK4,G6PD,DDX60L,ABCB1,SRXN1,CMPK2,RYR1,HK3,BMX,TOR1A,DGKA,ACTR2,GSK3A,PAPOLA,UBE2A,ACTR3,SRCAP,CTBP2,DNHD1,MARK3,CDK7,HYOU1,PIK3C3,SCYL2,CYB5R3,ANKK1,MINK1,CHUK,KIF5B,MAP3K3,ROCK1,UBE2K,TAOK3,KIF1…
GO:MF	oxidoreductase activity, acting on NAD(P)H, quinone or similar compound as acceptor	GO:0016655	FALSE	2.8052832867957615e-8	7.552023275698371	58	6180	42	20246	NDUFS4,NDUFA4,AKR1C3,NDUFB1,NDUFA1,NDUFB4,NDUFA2,NDUFB3,NDUFB6,ND5,NQO2,ND4,NDUFB5,TP53I3,NDUFA8,NDUFS6,NDUFC1,NDUFS2,NDUFC2,CBR1,CBR3,NDUFB10,ND2,NDUFV2,NDUFB7,DHRS4,NDUFA9,AKR1C1,DCXR,NDUFS7,AIFM2,NDUFA12,ND4L,RTN4IP1,NDUFS5,NDUFB2,NDUFS3,NDUFS8,NDUFV1,NDUFB9,MT-ND3,MT-ND1
GO:MF	transferase activity, transferring phosphorus-containing groups	GO:0016772	FALSE	3.076434471615435e-8	7.511952330996531	1176	6180	460	20246	HK2,IRAK3,PFKFB2,IGF1R,LTF,PRKAB2,TNIK,NME7,CDK5R1,MAP3K15,TGFBR3,MAP3K21,EGF,TRIB2,PRKACB,SRPK1,RHOH,NRG1,EPHA4,PRIM1,LTBP1,IRS2,MAPK14,HSP90AB1,AATK,AK3,IRGM,NUAK1,PFKFB4,SPHK1,MPP1,PDK4,MED21,CMPK2,HK3,BMX,DGKA,GSK3A,CNKSR1,PAPOLA,CALM2,MARK3,CDK7,YWHAB,PIK3C3,SCYL2,POLR2F,ANKK1,MINK1,CCNH,CHUK,GIT2,APC,MAP3K3,ROCK1,TAOK3,MOB1A,CASP3,POLR2E,PRKAR1B,SGMS1,TRRAP,TRIM24,PPM1D,CAD,TGFBR1,FPGT,TERF…
GO:MF	ubiquitin protein ligase binding	GO:0031625	FALSE	3.6754141604831137e-8	7.434693715769459	306	6180	147	20246	PYHIN1,CCT2,FZD5,TRIB2,PRKACB,HSP90AB1,CLU,CCDC50,ABCB1,UBE2A,TP53,CUL3,RTN4,PRDX6,KDM4A,APC,TMBIM6,UBE2K,UBE2D3,TOLLIP,MFHAS1,TSG101,TGFBR1,DAZAP2,RB1,SLC25A5,TNFRSF14,NFKBIA,UBE2W,ABI2,JKAMP,ATP6V0C,TRIM28,SUMO1,EIF4E2,RRAGA,HSPA1L,LYN,APBB1,CDKN1B,SPOPL,TRAF4,ZNF746,BID,RIPK1,BAG4,UBE2J1,NEDD8,HSPA1A,CTNNB1,USP13,RFFL,UBC,TANK,RALB,UBASH3B,ANAPC2,HSPA6,GABARAPL2,PRKAR1A,YWHAZ,HDAC6,NEK6,SMAD3,…
GO:MF	phosphotransferase activity, alcohol group as acceptor	GO:0016773	FALSE	5.287723940315976e-8	7.276731226428432	906	6180	365	20246	HK2,IRAK3,PFKFB2,IGF1R,LTF,PRKAB2,TNIK,NME7,CDK5R1,MAP3K15,TGFBR3,MAP3K21,EGF,TRIB2,PRKACB,SRPK1,NRG1,EPHA4,LTBP1,MAPK14,HSP90AB1,AATK,IRGM,NUAK1,PFKFB4,SPHK1,PDK4,HK3,BMX,DGKA,GSK3A,CALM2,MARK3,CDK7,YWHAB,PIK3C3,SCYL2,ANKK1,MINK1,CCNH,CHUK,APC,MAP3K3,ROCK1,TAOK3,MOB1A,CASP3,PRKAR1B,TRIM24,PPM1D,CAD,TGFBR1,DAZAP2,CDKN2D,STK19,RHEB,MAPK11,MAP3K5,MKNK2,VEGFA,ITK,SIK1,NPR2,HTATIP2,CLK3,ABR,NRBP2,MAP…
GO:MF	protein kinase activity	GO:0004672	FALSE	7.544420288967917e-8	7.122374125666373	786	6180	322	20246	IRAK3,IGF1R,LTF,PRKAB2,TNIK,NME7,CDK5R1,MAP3K15,TGFBR3,MAP3K21,EGF,TRIB2,PRKACB,SRPK1,NRG1,EPHA4,LTBP1,MAPK14,HSP90AB1,AATK,IRGM,NUAK1,PDK4,BMX,GSK3A,CALM2,MARK3,CDK7,YWHAB,PIK3C3,SCYL2,ANKK1,MINK1,CCNH,CHUK,APC,MAP3K3,ROCK1,TAOK3,MOB1A,CASP3,PRKAR1B,TRIM24,PPM1D,CAD,TGFBR1,DAZAP2,CDKN2D,STK19,RHEB,MAPK11,MAP3K5,MKNK2,VEGFA,ITK,SIK1,NPR2,HTATIP2,CLK3,ABR,NRBP2,MAP4K1,CAMK2G,FGR,HYAL2,IQGAP1,LTK,R…
GO:MF	proton transmembrane transporter activity	GO:0015078	FALSE	1.040583272844025e-7	6.9827231595757935	186	6180	98	20246	NDUFS4,NDUFA4,NDUFB1,ATP6V1D,NDUFA1,NDUFB4,SURF1,NDUFA2,NDUFB3,COX7B,UQCR10,COX5A,UQCRFS1,ATP6V0E1,NDUFB6,SLC25A5,UCP2,SLC16A3,ATP6V1C1,ND5,COX8A,ATP6V0C,ATP6,ATP5J,SLC25A3,SLC4A11,COX5B,SLC38A5,SLC9B2,ATP6V1E1,COX3,COX6B1,COX2,SLC17A5,ND4,NDUFB5,ATP6V1A,NDUFA8,SLC30A1,NDUFS6,NDUFC1,COX7A2L,ATP6V0A1,NDUFS2,GHITM,SLC36A1,COX1,ATP6V1G1,TCIRG1,NDUFC2,ATP6V0E2,NDUFB10,ATP6V1F,ND2,SLC9A7,CYTB,NDUFV2,A…
GO:MF	hydrolase activity	GO:0016787	FALSE	1.2728728589442306e-7	6.895214973735593	3255	6180	1145	20246	GZMK,TDRD9,MMP8,CAPNS2,TIMP2,PFKFB2,HPR,ARL4C,CCT2,ERAP2,NDST1,PLBD1,SIPA1L2,CHIT1,ELAC1,VCAN,ARG1,SPINK2,PNPLA2,LTF,HP,ABCD2,C1RL,TNS2,RNASE1,NME7,PPP1R17,ELANE,OTUD3,RAB13,THEM4,OLAH,KIF3C,PPM1K,RRAGD,CES1,ABCC2,EGF,FGD4,SERPINB2,PROS1,HINT1,DDX17,MMP9,CTSD,PGLYRP1,RHOH,SIRPA,HTRA1,PIWIL4,TLR2,THBS1,DUSP5,AZU1,HSP90AB1,GZMA,GEN1,PPP1R26,SLPI,PTPN4,RPS27L,GUF1,ATP8B4,PPP4R1,ABCA13,RNASE3,GBE1,IL…
GO:MF	transcription coregulator activity	GO:0003712	FALSE	2.1029318280631918e-7	6.677174805856646	491	6180	214	20246	ATF7IP2,ELANE,MAML1,KDM7A,DDX17,NRG1,CENPJ,SIAH2,SCAI,MED21,TAF12,SRCAP,CTBP2,TADA3,MTA3,MIER1,JAZF1,ARID1A,HDAC3,MYCBP,ATN1,PHF2,SAP30,TRRAP,TRIM24,HMGA1,TSG101,USP21,SETD5,MECP2,CREG1,ZMIZ1,SAP30L,NCOA4,MED13,RB1,HCFC1,HTATIP2,SETD3,HSBP1,HYAL2,MED1,ENY2,ARID5B,ARID3A,HMGB2,TRIM28,SF1,RCOR1,RRP1B,BCL9L,APBB1,IRF4,DYRK1A,Q16594,TRIP4,ZMYND8,FIZ1,LMO2,HDAC4,COPS5,MYBBP1A,HSPA1A,CTNNB1,KAT2A,CTBP1…
GO:MF	NADH dehydrogenase (ubiquinone) activity	GO:0008137	FALSE	2.1832578930744752e-7	6.660894961073305	41	6180	32	20246	NDUFS4,NDUFA4,NDUFB1,NDUFA1,NDUFB4,NDUFA2,NDUFB3,NDUFB6,ND5,ND4,NDUFB5,NDUFA8,NDUFS6,NDUFC1,NDUFS2,NDUFC2,NDUFB10,ND2,NDUFV2,NDUFB7,NDUFA9,NDUFS7,NDUFA12,ND4L,NDUFS5,NDUFB2,NDUFS3,NDUFS8,NDUFV1,NDUFB9,MT-ND3,MT-ND1
GO:MF	transcription factor binding	GO:0008134	FALSE	2.40609794423232e-7	6.618686697954671	599	6180	253	20246	RORA,EOMES,CEBPA,WIPI1,TRIB2,TCF4,MAPK14,ZNHIT3,IFI27,GFI1B,MYC,TRIP12,TAF12,CTBP2,DR1,YY1,CBX3,TADA3,TP53,RAD21,ARID1A,CBX5,HDAC3,EPAS1,CRTC2,TRIM24,HMGA1,GTF2A1,RARG,DAZAP2,SP3,MED13,RB1,HCFC1,RBPJ,SIK1,SETD3,NFKBIA,SP100,MED1,FBP1,HMGB2,ETS1,NR3C1,SUZ12,SUMO1,STAT5B,HDAC2,RAD23B,FOXO3,PSMA6,DAPK3,SOX8,RXRA,GTF2I,Q16594,TRIP4,ZMYND8,FIZ1,HCLS1,LMO2,HDAC4,MAX,MYBBP1A,EHMT2,CTNNB1,KAT2A,TAF10,CTB…
GO:MF	protein domain specific binding	GO:0019904	FALSE	2.526422491787817e-7	6.597494020958384	655	6180	273	20246	CLEC3B,EVL,PLEKHA1,TGFBR3,ATXN1L,SH2B2,SKAP1,SYP,FUT8,SIRPA,EPHA4,IRS2,HSP90AB1,CENPJ,IRGM,KIF21A,ABTB3,DOCK4,PRRG4,SH3BP1,AFAP1,JDP2,DNAJC6,INSC,LAMP1,CEP68,OSTF1,MBD2,YWHAB,CDC42,CBX3,SLC34A1,TADA3,CRADD,TP53,CD3E,U2AF1,ARHGAP1,CUL3,HOMER3,PLSCR3,PTPN12,KPNB1,MPP7,ATN1,SIT1,INPP5D,MECP2,DAZAP2,LRRFIP2,HGS,RHOQ,CHMP2A,MAP3K5,RB1,STMN3,ARHGAP27,VASP,SP100,MED1,IQGAP1,CHMP1B,ABI2,NUMA1,ESRRA,HMGB2…
GO:MF	ubiquitin-like protein ligase binding	GO:0044389	FALSE	3.1962925432492624e-7	6.495353478386669	324	6180	151	20246	PYHIN1,CCT2,FZD5,TRIB2,PRKACB,HSP90AB1,CLU,CCDC50,ABCB1,UBE2A,TP53,CUL3,RTN4,PRDX6,KDM4A,APC,TMBIM6,UBE2K,UBE2D3,TOLLIP,MFHAS1,TSG101,TGFBR1,DAZAP2,HGS,RB1,SLC25A5,TNFRSF14,NFKBIA,UBE2W,ABI2,JKAMP,ATP6V0C,TRIM28,SUMO1,EIF4E2,RRAGA,HSPA1L,LYN,APBB1,CDKN1B,SPOPL,TRAF4,TRIP4,ZNF746,BID,RIPK1,BAG4,UBE2J1,NEDD8,HSPA1A,CTNNB1,USP13,RFFL,UBC,TANK,RALB,UBASH3B,ANAPC2,CEBPB,HSPA6,GABARAPL2,PRKAR1A,YWHAZ,H…
GO:MF	enzyme regulator activity	GO:0030234	FALSE	5.985671532916145e-7	6.222887118995321	1339	6180	508	20246	TIMP2,SIPA1L2,VCAN,SPINK2,LTF,PPP1R17,CDK5R1,EGF,TRIB2,FGD4,SERPINB2,PROS1,RHOH,NRG1,SIRPA,IRS2,THBS1,HSP90AB1,PPP1R26,SLPI,RPS27L,PPP4R1,IRGM,SERPING1,PZP,RASGEF1B,RPS7,EEF1B2,DOCK4,NAIP,SH3BP1,PSMF1,PDE6H,BNIP2,CALM2,COX6A1,LAMTOR2,YWHAB,CD27,TP53,MMP24,CCNH,ARHGAP1,PPP4R2,PPP1R15B,GIT2,APC,TBC1D2,TMBIM6,TAOK3,DOCK9,MOB1A,PPP1R12C,CASP3,SH2D3C,RP2,MGST2,PRKAR1B,VAV3,PDGFB,ARHGAP26,DAZAP2,PREX1,…
GO:MF	NADH dehydrogenase activity	GO:0003954	FALSE	7.217250269836697e-7	6.141628234576894	44	6180	33	20246	NDUFS4,NDUFA4,NDUFB1,NDUFA1,NDUFB4,NDUFA2,NDUFB3,NDUFB6,ND5,ND4,NDUFB5,NDUFA8,NDUFS6,NDUFC1,NDUFS2,NDUFC2,NDUFB10,ND2,NDUFV2,NDUFB7,AIFM1,NDUFA9,NDUFS7,NDUFA12,ND4L,NDUFS5,NDUFB2,NDUFS3,NDUFS8,NDUFV1,NDUFB9,MT-ND3,MT-ND1
GO:MF	primary active transmembrane transporter activity	GO:0015399	FALSE	8.425680074256533e-7	6.074395035195263	167	6180	88	20246	ABCD2,NDUFS4,ABCC2,CYBRD1,NDUFA4,ABCA13,ATP7B,ABCD1,ABCB1,NDUFB1,ATP6V1D,NDUFA1,NDUFB4,SURF1,NDUFA2,NDUFB3,COX7B,UQCR10,COX5A,UQCRFS1,ATP6V0E1,NDUFB6,ATP7A,ABCC10,ATP6V1C1,ND5,COX8A,ATP6V0C,COX5B,ABCC5,ATP6V1E1,COX3,COX6B1,COX2,ATP13A2,ND4,ATP13A1,NDUFB5,ATP6V1A,NDUFA8,NDUFS6,NDUFC1,COX7A2L,ATP6V0A1,NDUFS2,ABCB8,COX1,RALBP1,ATP6V1G1,ABCC6,CYB561D2,TCIRG1,NDUFC2,ATP6V0E2,ABCA2,NDUFB10,ATP6V1F,ND2,…
GO:MF	metal ion binding	GO:0046872	FALSE	0.0000013047591130796071	5.884469661135568	4396	6180	1501	20246	MMP8,MTARC1,CAPNS2,IRAK3,IKZF3,TIMP2,ZNF134,RORA,PLOD2,ERAP2,KLF12,TSHZ3,ELAC1,CLEC3B,VCAN,ARG1,S100A12,LCN2,PTS,ZNF141,LTF,CSRP3,RNF144B,ASPH,RNF175,TRIM71,MIS18A,TNS2,ALOX15B,CDK5R1,MAP3K15,PGM5,TRPM2,ABAT,OSGEPL1,ZNF527,GALNT11,ZNF22,CLEC4E,PPM1K,MPO,CYBRD1,ITGA2B,REPS2,EGF,FGD4,KDM7A,PRKACB,MYL9,PROS1,SRPK1,MMP9,FKBP9,PGLYRP1,S100B,ZNF566,PTGR3,PRIM1,LTBP1,CYP1B1,TBXAS1,ZNF347,THBS1,B4GALT5,S…
GO:MF	cation binding	GO:0043169	FALSE	0.0000014432534947463528	5.84065738221165	4495	6180	1532	20246	MMP8,MTARC1,CAPNS2,IRAK3,IKZF3,TIMP2,ZNF134,RORA,PLOD2,ERAP2,KLF12,TSHZ3,ELAC1,CLEC3B,VCAN,ARG1,S100A12,LCN2,PTS,ZNF141,PLTP,LTF,CSRP3,RNF144B,ASPH,RNF175,TRIM71,MIS18A,TNS2,ALOX15B,CDK5R1,MAP3K15,PGM5,TRPM2,ABAT,OSGEPL1,ZNF527,GALNT11,ZNF22,CLEC4E,PPM1K,MPO,CYBRD1,ITGA2B,REPS2,EGF,FGD4,KDM7A,PRKACB,MYL9,PROS1,SRPK1,MMP9,FKBP9,PGLYRP1,S100B,ZNF566,PTGR3,PRIM1,LTBP1,CYP1B1,TBXAS1,ZNF347,THBS1,B4GA…
GO:MF	adenyl ribonucleotide binding	GO:0032559	FALSE	0.000002161779750489297	5.66518855553521	1558	6180	578	20246	TDRD9,HK2,IRAK3,PFKFB2,CCT2,IGF1R,HSPH1,TNIK,ABCD2,NME7,MAP3K15,KIF3C,MAP3K21,ABCC2,TRIB2,PRKACB,SRPK1,DDX17,EPHA4,MAPK14,HSP90AB1,AATK,ATP8B4,ABCA13,AK3,ATP7B,NUAK1,PFKFB4,SPHK1,KIF21A,ABCD1,NAIP,PDK4,DDX60L,ABCB1,SRXN1,CMPK2,RYR1,HK3,BMX,TOR1A,DGKA,ACTR2,GSK3A,PAPOLA,UBE2A,ACTR3,SRCAP,DNHD1,MARK3,CDK7,HYOU1,PIK3C3,SCYL2,CYB5R3,ANKK1,MINK1,CHUK,KIF5B,MAP3K3,ROCK1,UBE2K,TAOK3,KIF1C,UBE2D3,PSMC1,P…
GO:MF	small GTPase binding	GO:0031267	FALSE	0.0000029415203251946207	5.531428146396245	285	6180	133	20246	XPO1,SYTL2,FGD4,RHOH,CYFIP1,DOCK4,BRK1,DIAPH1,ARHGAP1,GIT2,KPNB1,ROCK1,USP33,RILPL2,PLEKHG3,PICALM,TNFAIP1,RANBP3,ATP7A,MYO5A,ATP6AP1,HPS6,RAP1A,IQGAP1,RAB7A,ABI2,NCF2,XPO7,KNTC1,DAPK3,LRRK2,EHD1,PKN2,C9ORF72,BICD2,DENND1A,PAK2,GGA2,XPO4,CYFIP2,PAK1,PLEKHG2,RPH3AL,EXOC8,ARHGDIB,RAB34,YIPF1,RAB3GAP2,MAP3K11,TMEM127,RANBP9,RIN3,LZTR1,EVI5,RAB11FIP1,NOXA1,DMXL2,PPP6R1,IFT20,FGD1,PLEKHG1,TRIP11,DAAM1…
GO:MF	protein serine/threonine kinase activity	GO:0004674	FALSE	0.0000032113344856612334	5.493314456902688	557	6180	233	20246	IRAK3,LTF,PRKAB2,TNIK,CDK5R1,MAP3K15,TGFBR3,MAP3K21,PRKACB,SRPK1,LTBP1,MAPK14,AATK,IRGM,NUAK1,PDK4,GSK3A,CALM2,MARK3,CDK7,ANKK1,MINK1,CCNH,CHUK,MAP3K3,ROCK1,TAOK3,MOB1A,CASP3,PRKAR1B,PPM1D,TGFBR1,DAZAP2,CDKN2D,STK19,RHEB,MAPK11,MAP3K5,MKNK2,SIK1,HTATIP2,CLK3,ABR,NRBP2,MAP4K1,CAMK2G,IQGAP1,RIOK3,OBSCN,PIK3CA,MAP2K4,CDKN1B,DAPK3,PIK3CG,LRRK2,PYDC1,CAMK4,DYRK1A,PIM3,PKN2,MAP3K9,TTN,HIPK1,RIPK1,STK3,…
GO:MF	GTPase binding	GO:0051020	FALSE	0.000003252705683928249	5.487755231408744	317	6180	145	20246	XPO1,SYTL2,RRAGD,FGD4,RHOH,CYFIP1,DOCK4,GNB1,BRK1,DIAPH1,ARHGAP1,GIT2,KPNB1,ROCK1,USP33,RILPL2,PLEKHG3,PICALM,TNFAIP1,RANBP3,ATP7A,MYO5A,ATP6AP1,HPS6,RAP1A,IQGAP1,RAB7A,ABI2,NCF2,XPO7,KNTC1,DAPK3,LRRK2,EHD1,PKN2,C9ORF72,BICD2,DENND1A,PAK2,GGA2,XPO4,CYFIP2,PAK1,PLEKHG2,RPH3AL,EXOC8,ARHGDIB,RAB34,YIPF1,RAB3GAP2,MAP3K11,TMEM127,RANBP9,RIN3,LCP1,CLTA,LZTR1,EVI5,RAB11FIP1,NOXA1,RABAC1,DMXL2,PPP6R1,IFT…
GO:MF	ATP binding	GO:0005524	FALSE	0.000004088211463717427	5.3884666483062205	1516	6180	562	20246	TDRD9,HK2,IRAK3,PFKFB2,CCT2,IGF1R,HSPH1,TNIK,ABCD2,NME7,MAP3K15,KIF3C,MAP3K21,ABCC2,TRIB2,PRKACB,SRPK1,DDX17,EPHA4,MAPK14,HSP90AB1,AATK,ATP8B4,ABCA13,AK3,ATP7B,NUAK1,PFKFB4,SPHK1,KIF21A,ABCD1,NAIP,PDK4,DDX60L,ABCB1,SRXN1,CMPK2,RYR1,HK3,BMX,TOR1A,DGKA,ACTR2,GSK3A,PAPOLA,UBE2A,ACTR3,SRCAP,DNHD1,MARK3,CDK7,HYOU1,PIK3C3,SCYL2,ANKK1,MINK1,CHUK,KIF5B,MAP3K3,ROCK1,UBE2K,TAOK3,KIF1C,UBE2D3,PSMC1,PNPLA8,K…
GO:MF	GDP binding	GO:0019003	FALSE	0.000004975428733028015	5.303169490121117	324	6180	147	20246	RRAGD,EGF,FGD4,RASGEF1B,EEF1B2,DOCK4,RRAS2,LAMTOR2,DOCK9,SH2D3C,VAV3,GNAI3,RAB2A,PREX1,PLEKHG3,RHEB,PLCG1,RAP1B,ARF4,RAB18,ARFGEF1,UCP2,ABR,SH2D3A,GNA13,RAP1A,RAB7A,OBSCN,RAB21,RAB10,SH3BP5L,C9ORF72,RAB35,DENND1A,MCF2L,LAMTOR3,RAPGEF2,PLEKHG4,RALB,RAB28,SEC61B,RAB27A,GRIPAP1,RAB5A,RIT1,ARL8B,PLEKHG2,RHOF,ARHGDIB,ARHGEF1,IQSEC1,RAB3GAP2,RAB11B,VAV1,RIN3,HERC2,SOS2,FGD1,RALGDS,PLEKHG1,RAB31,RRAGC,S…
GO:MF	DNA-binding transcription factor binding	GO:0140297	FALSE	0.000005980742430956755	5.223244900684846	488	6180	207	20246	EOMES,CEBPA,WIPI1,TRIB2,MAPK14,ZNHIT3,IFI27,GFI1B,MYC,TRIP12,TAF12,CTBP2,YY1,TADA3,TP53,RAD21,ARID1A,CBX5,HDAC3,EPAS1,CRTC2,TRIM24,HMGA1,GTF2A1,RARG,DAZAP2,SP3,MED13,RB1,HCFC1,RBPJ,SIK1,SETD3,NFKBIA,SP100,MED1,FBP1,HMGB2,ETS1,STAT5B,HDAC2,RAD23B,PSMA6,DAPK3,SOX8,RXRA,GTF2I,Q16594,TRIP4,ZMYND8,FIZ1,HCLS1,LMO2,HDAC4,MAX,CTNNB1,KAT2A,TAF10,CTBP1,USF2,NR1H4,TAF7,STK4,CRTC3,TMF1,TRERF1,ASCL2,ZNF516,DY…
GO:MF	modification-dependent protein binding	GO:0140030	FALSE	0.000006544132606926601	5.184147908928269	170	6180	87	20246	KDM7A,ABRAXAS1,MORC4,PSMD4,CBX3,UFD1L,CBX5,KDM4A,PHF2,SHARPIN,TRIM24,UBQLN1,SETD5,PLCG2,PRPF8,TAB2,CBX1,ING3,SUZ12,RAD23B,ZFAND6,LYN,ZMYND8,AGAP3,ING2,UIMC1,BRD4,SPIN3,TOM1,MPHOSPH8,CBX4,HDAC6,VAV1,MLLT1,L3MBTL2,THAP7,CARM1,UBAC1,FMR1,RAD18,BRCC3,ING5,ING1,VCP,UBL7,DPF2,BRD3,UBQLN2,MPND,PHF13,GLYR1,YWHAG,ATRIP,LRWD1,CBX8,NCAPG2,WDR81,MSH6,UBQLN4,MSL3,NCAPD3,ATAD2B,SPIN2B,CHD1L,PHF20L1,SPIN1,CBX6,…
GO:MF	kinase binding	GO:0019900	FALSE	0.000013958023594697435	4.855176071876403	796	6180	314	20246	IRAK3,PFKFB2,STX17,FZD5,GADD45A,PRKAB2,TNS2,CDK5R1,CEBPA,GP6,MAML1,SH2B2,TRIB2,HINT1,SKAP1,RHOH,NRG1,SIRPA,EPHA4,FCRL3,IRS2,MAPK14,ITGB3,HSP90AB1,CENPJ,IRGM,RPS7,GAB2,DOCK4,NAIP,PTPRK,GSK3A,CEP68,CTBP2,CALM2,CDC42,TP53,CD3E,MAPRE1,EIF3A,APC,PPP1R12C,SIT1,PRKAR1B,ITGB2,KCNQ1,PTPRC,PPM1D,TOLLIP,SPDYE2,UBQLN1,DAZAP2,CDKN2D,NBR1,RHEB,PTPN23,RNF13,PLCG1,RHOQ,PLCG2,IFNAR2,PDCD10,MAP3K5,FLT3LG,RB1,MIDN,…
GO:MF	cadherin binding	GO:0045296	FALSE	0.00003591674410371512	4.444703039540353	335	6180	148	20246	OLFM4,CDK5R1,SHTN1,HSP90AB1,PLIN3,S100P,YWHAB,SPTAN1,PCMT1,PLEC,MMP24,MAPRE1,CAPZA1,ARHGAP1,RTN4,PRDX6,SH3GLB2,KIF5B,TBC1D2,MPP7,DOCK9,EIF4H,SH3GLB1,PICALM,KRT18,FSCN1,HCFC1,CLIC1,LYPLA2,VASP,TXNDC9,IQGAP1,RAB1A,OBSCN,CD46,DCHS1,RAB10,EHD1,PKN2,HSPA1A,CTNNB1,PAK2,FXYD5,EXOC3,LRRC59,TRIM25,GIGYF2,PPP1R13L,RAB11B,YWHAZ,EMD,PTPN11,ACVR1,MPRIP,PPFIBP1,ABCF3,HNRNPK,CNN2,SCYL1,NUMB,ANK3,DBN1,ANXA1,GOLG…
GO:MF	ribonucleoside triphosphate phosphatase activity	GO:0017111	FALSE	0.00004594415198732556	4.337769760039888	1201	6180	449	20246	TDRD9,ARL4C,CCT2,SIPA1L2,ABCD2,RAB13,KIF3C,RRAGD,ABCC2,EGF,FGD4,DDX17,RHOH,SIRPA,HSP90AB1,GUF1,ATP8B4,ABCA13,ATP7B,IRGM,KIF21A,MORC4,RASGEF1B,RAB30,ABCD1,EEF1B2,DOCK4,NAIP,RAB36,DDX60L,SH3BP1,RRAS2,ABCB1,TOR1A,GNB1,BNIP2,SRCAP,RGS19,LAMTOR2,CDC42,ARHGAP1,GNAI2,KIF5B,GIT2,TBC1D2,DOCK9,KIF1C,SH2D3C,RP2,PSMC1,VAV3,ARHGAP26,KIFC2,GNAI3,RAB2A,PREX1,PLEKHG3,RHEB,RANBP3,PLCG1,RHOQ,ATP7A,DDX59,UPF1,GPN3,…
GO:MF	oxidoreductase activity, acting on NAD(P)H	GO:0016651	FALSE	0.00012605752542294254	3.8994312225611054	95	6180	53	20246	NDUFS4,NDUFA4,AKR1C3,NDUFB1,CYB5R3,NDUFA1,NDUFB4,NDUFA2,NDUFB3,PDGFB,NDUFB6,ND5,CYB5R4,NCF2,NQO2,SH3PXD2A,CYBA,ND4,NDUFB5,TP53I3,NDUFA8,NDUFS6,NOXA1,NDUFC1,NDUFS2,NDUFC2,CBR1,CBR3,NDUFB10,ND2,CYBB,NDUFV2,NDUFB7,KMO,DHRS4,AIFM1,NDUFA9,AKR1C1,DCXR,NDUFS7,AIFM2,NDUFA12,ND4L,RTN4IP1,NDUFS5,NDUFB2,NDUFS3,NDUFS8,AIFM3,NDUFV1,NDUFB9,MT-ND3,MT-ND1
GO:MF	pyrophosphatase activity	GO:0016462	FALSE	0.00012811053348250475	3.8924151603001653	1261	6180	466	20246	TDRD9,ARL4C,CCT2,SIPA1L2,ABCD2,RAB13,KIF3C,RRAGD,ABCC2,EGF,FGD4,DDX17,RHOH,SIRPA,HSP90AB1,GUF1,ATP8B4,ABCA13,ATP7B,IRGM,KIF21A,MORC4,RASGEF1B,RAB30,ABCD1,EEF1B2,DOCK4,NAIP,RAB36,DDX60L,SH3BP1,RRAS2,ABCB1,TOR1A,GNB1,BNIP2,SRCAP,RGS19,LAMTOR2,CDC42,ARHGAP1,GNAI2,KIF5B,GIT2,TBC1D2,DOCK9,KIF1C,SH2D3C,RP2,PSMC1,VAV3,ARHGAP26,KIFC2,GNAI3,RAB2A,PREX1,PLEKHG3,RHEB,RANBP3,PLCG1,RHOQ,NUDT3,ATP7A,DDX59,UPF1…
GO:MF	protein serine kinase activity	GO:0106310	FALSE	0.0001302823278047106	3.885114490330459	360	6180	155	20246	TNIK,MAP3K15,MAP3K21,PRKACB,SRPK1,MAPK14,AATK,NUAK1,GSK3A,MARK3,CDK7,ANKK1,MINK1,MAP3K3,ROCK1,TAOK3,MAPK11,MAP3K5,MKNK2,SIK1,CLK3,MAP4K1,CAMK2G,RIOK3,OBSCN,PIK3CA,MAP2K4,DAPK3,PIK3CG,LRRK2,CAMK4,DYRK1A,PIM3,PKN2,MAP3K9,TTN,HIPK1,RIPK1,STK3,MAP2K3,PAK2,STK10,STK40,PAK1,MAP3K2,STK4,OXSR1,CDK19,DMPK,ULK3,FAM20C,NUAK2,STK38L,RPS6KB2,SRPK2,CAMKK2,PLK1,MAP3K11,TRPM6,MAPK1,NEK6,MAPKAPK3,MAP3K1,PRKCZ,TAO…
GO:MF	hydrolase activity, acting on acid anhydrides, in phosphorus-containing anhydrides	GO:0016818	FALSE	0.0001424683808849058	3.8462815113110564	1262	6180	466	20246	TDRD9,ARL4C,CCT2,SIPA1L2,ABCD2,RAB13,KIF3C,RRAGD,ABCC2,EGF,FGD4,DDX17,RHOH,SIRPA,HSP90AB1,GUF1,ATP8B4,ABCA13,ATP7B,IRGM,KIF21A,MORC4,RASGEF1B,RAB30,ABCD1,EEF1B2,DOCK4,NAIP,RAB36,DDX60L,SH3BP1,RRAS2,ABCB1,TOR1A,GNB1,BNIP2,SRCAP,RGS19,LAMTOR2,CDC42,ARHGAP1,GNAI2,KIF5B,GIT2,TBC1D2,DOCK9,KIF1C,SH2D3C,RP2,PSMC1,VAV3,ARHGAP26,KIFC2,GNAI3,RAB2A,PREX1,PLEKHG3,RHEB,RANBP3,PLCG1,RHOQ,NUDT3,ATP7A,DDX59,UPF1…
GO:MF	hydrolase activity, acting on acid anhydrides	GO:0016817	FALSE	0.0001424683808849058	3.8462815113110564	1262	6180	466	20246	TDRD9,ARL4C,CCT2,SIPA1L2,ABCD2,RAB13,KIF3C,RRAGD,ABCC2,EGF,FGD4,DDX17,RHOH,SIRPA,HSP90AB1,GUF1,ATP8B4,ABCA13,ATP7B,IRGM,KIF21A,MORC4,RASGEF1B,RAB30,ABCD1,EEF1B2,DOCK4,NAIP,RAB36,DDX60L,SH3BP1,RRAS2,ABCB1,TOR1A,GNB1,BNIP2,SRCAP,RGS19,LAMTOR2,CDC42,ARHGAP1,GNAI2,KIF5B,GIT2,TBC1D2,DOCK9,KIF1C,SH2D3C,RP2,PSMC1,VAV3,ARHGAP26,KIFC2,GNAI3,RAB2A,PREX1,PLEKHG3,RHEB,RANBP3,PLCG1,RHOQ,NUDT3,ATP7A,DDX59,UPF1…
GO:MF	transcription corepressor activity	GO:0003714	FALSE	0.0001496142432083955	3.8250270598648646	200	6180	95	20246	ELANE,SIAH2,SCAI,CTBP2,MTA3,MIER1,JAZF1,HDAC3,ATN1,SAP30,TSG101,SETD5,MECP2,CREG1,RB1,HSBP1,MED1,TRIM28,SF1,RCOR1,ZMYND8,HDAC4,MYBBP1A,HSPA1A,CTBP1,CIR1,TRERF1,SNW1,FOXP3,COPS2,HMGB1,CBFA2T2,CBFA2T3,PPP1R13L,MTA2,HIRA,CBX4,TDP2,DNMT3A,RLIM,RBBP8,ASAH1,DHRS7B,TAF9B,NCOA5,TCERG1,SIN3B,SRSF2,ZNF653,DPF2,PARP15,TBL1Y,APEX1,CRYM,ZNF541,TBL1X,BASP1,CCND1,CHD4,ZFPM2,PRDM8,GPS2,MAP3K10,LIMD1,LMCD1,NR0B2,…
GO:MF	signaling adaptor activity	GO:0035591	FALSE	0.0002837754962251676	3.5470251082218844	121	6180	63	20246	GRB10,CD3G,HAX1,SH2B2,IRS2,GAB2,GNB1,CD3E,MPP7,IFNAR2,IFNAR1,WDR59,IQGAP1,SARM1,ABI2,LDLRAP1,LRRK2,FADD,SPAG9,RIPK1,HCLS1,TRAT1,FCRL2,SLA2,GAB1,PTPN11,LAMP2,SPATA2,GNB4,SH2B1,AIM2,BIN1,FMR1,GRIP1,GNB5,NLRP1,SH3RF1,BLNK,BANK1,CARD10,GNB3,DEDD2,CRKL,NUP62,TRAF2,TICAM1,AKAP13,KHDRBS1,NLRP6,FRS2,ABI3,ARF6,SHC1,MAPK8IP1,DOK2,MAPK8IP2,SHB,STAP2,CARD9,RACK1,KSR2,MAP2K2,STING1
GO:MF	guanyl-nucleotide exchange factor activity	GO:0005085	FALSE	0.00038416283575662006	3.4154846514641966	235	6180	107	20246	EGF,FGD4,RASGEF1B,EEF1B2,DOCK4,LAMTOR2,DOCK9,SH2D3C,VAV3,PREX1,PLEKHG3,PLCG1,ARF4,ARFGEF1,ABR,SH2D3A,GNA13,RAP1A,OBSCN,SH3BP5L,C9ORF72,DENND1A,MCF2L,LAMTOR3,RAPGEF2,PLEKHG4,SEC61B,GRIPAP1,PLEKHG2,RHOF,ARHGEF1,IQSEC1,RAB3GAP2,VAV1,RIN3,HERC2,SOS2,FGD1,RALGDS,PLEKHG1,SBF2,RGL4,BCR,FGD3,DOCK11,DENND3,RALGPS2,DENND5A,DOCK8,RCBTB2,ARHGEF19,ARHGEF12,IQSEC2,ARHGEF7,P2RY12,FGD2,BCAR3,RHOD,RALGPS1,PLEKHG6…
GO:MF	acyltransferase activity	GO:0016746	FALSE	0.00047241477144755524	3.325676531342461	778	6180	299	20246	KLHL20,PNPLA2,RNF144B,RNF175,TRIM71,OSGEPL1,TRIB2,CRAT,ALAS2,ZDHHC19,MBOAT2,HECW2,NMT2,F13A1,SPHK1,RPS7,SIAH2,RNF135,MED21,TRIP12,UBE2A,SRCAP,LPGAT1,ZDHHC3,CDC42,ANAPC11,AGPAT2,RNF139,CUL3,LMO7,FBXO44,NAA60,PRDX6,RNF181,UBE2K,UBE2D3,FBXL5,SHARPIN,LCAT,TRIM33,TRIM24,PCGF3,TNFAIP1,ZMIZ1,TRIM41,RNF13,RSPRY1,UBE2R2,ZDHHC20,TRAF6,MED1,UBE2W,SAT1,RNF130,FBXL22,ING3,MYLIP,RNF141,LPCAT4,TRIM28,HECTD3,TRA…
GO:MF	protein kinase binding	GO:0019901	FALSE	0.0007188763860303903	3.1433457820514676	717	6180	277	20246	IRAK3,PFKFB2,STX17,FZD5,PRKAB2,CDK5R1,GP6,MAML1,SH2B2,TRIB2,HINT1,SKAP1,RHOH,NRG1,SIRPA,EPHA4,FCRL3,IRS2,MAPK14,ITGB3,HSP90AB1,CENPJ,IRGM,RPS7,GAB2,DOCK4,NAIP,PTPRK,GSK3A,CEP68,CTBP2,CALM2,CDC42,TP53,CD3E,MAPRE1,EIF3A,APC,PPP1R12C,PRKAR1B,ITGB2,KCNQ1,PTPRC,PPM1D,SPDYE2,DAZAP2,CDKN2D,NBR1,RHEB,PTPN23,RNF13,PLCG1,RHOQ,PLCG2,IFNAR2,PDCD10,MAP3K5,FLT3LG,SIK1,TRAF6,STK11IP,PPP1R12A,MVP,FGR,HYAL2,IQGAP…
GO:MF	methylation-dependent protein binding	GO:0140034	FALSE	0.0011677154227961077	2.9326629837371843	74	6180	42	20246	KDM7A,MORC4,CBX3,CBX5,KDM4A,PHF2,SETD5,CBX1,ING3,SUZ12,ZMYND8,ING2,SPIN3,MPHOSPH8,CBX4,L3MBTL2,THAP7,FMR1,ING5,ING1,PHF13,GLYR1,LRWD1,CBX8,NCAPG2,MSH6,MSL3,NCAPD3,SPIN2B,PHF20L1,SPIN1,CBX6,CHD8,ZZZ3,WDR5,RRP8,BPTF,MORC3,L3MBTL3,SGF29,PHF1,ING4
GO:MF	guanyl nucleotide binding	GO:0019001	FALSE	0.0012006952684171124	2.9205672007882497	651	6180	253	20246	ARL4C,RAB13,RRAGD,EGF,FGD4,GIMAP5,RHOH,TUBE1,GUF1,AK3,IRGM,RASGEF1B,RAB30,EEF1B2,DOCK4,RAB36,RRAS2,GIMAP2,PDE6H,LAMTOR2,CDC42,ERAL1,GNAI2,DOCK9,SH2D3C,RP2,VAV3,GNAI3,MFHAS1,FPGT,RAB2A,PREX1,PLEKHG3,TUBG2,RHEB,PLCG1,RHOQ,GPN3,RAP1B,ARF4,ARL8A,RAB18,NPR2,ARFGEF1,UCP2,ABR,SEPT6,SH2D3A,GNA13,RAP1A,RAB7A,ARF5,RAB1A,OBSCN,RRAGA,RAB21,LRRK2,RAB10,EHD1,SH3BP5L,C9ORF72,RAB37,DRG2,RAB35,DENND1A,RAB2B,MCF2L…
GO:MF	guanyl ribonucleotide binding	GO:0032561	FALSE	0.0012006952684171124	2.9205672007882497	651	6180	253	20246	ARL4C,RAB13,RRAGD,EGF,FGD4,GIMAP5,RHOH,TUBE1,GUF1,AK3,IRGM,RASGEF1B,RAB30,EEF1B2,DOCK4,RAB36,RRAS2,GIMAP2,PDE6H,LAMTOR2,CDC42,ERAL1,GNAI2,DOCK9,SH2D3C,RP2,VAV3,GNAI3,MFHAS1,FPGT,RAB2A,PREX1,PLEKHG3,TUBG2,RHEB,PLCG1,RHOQ,GPN3,RAP1B,ARF4,ARL8A,RAB18,NPR2,ARFGEF1,UCP2,ABR,SEPT6,SH2D3A,GNA13,RAP1A,RAB7A,ARF5,RAB1A,OBSCN,RRAGA,RAB21,LRRK2,RAB10,EHD1,SH3BP5L,C9ORF72,RAB37,DRG2,RAB35,DENND1A,RAB2B,MCF2L…
GO:MF	GTPase regulator activity	GO:0030695	FALSE	0.0013222485700592657	2.878686893974855	499	6180	200	20246	SIPA1L2,EGF,FGD4,RHOH,SIRPA,RASGEF1B,EEF1B2,DOCK4,SH3BP1,BNIP2,LAMTOR2,ARHGAP1,GIT2,TBC1D2,DOCK9,SH2D3C,RP2,VAV3,ARHGAP26,PREX1,PLEKHG3,RANBP3,PLCG1,ARF4,ARFGEF1,ARHGAP27,ABR,SH2D3A,GNA13,RAP1A,IQGAP1,OBSCN,RGS3,LRRK2,SH3BP5L,C9ORF72,TBC1D4,DENND1A,MCF2L,SEC23A,AGAP3,LAMTOR3,ELMOD2,RAPGEF2,PLEKHG4,SEC61B,GRIPAP1,PLEKHG2,RHOF,ARHGDIB,ARHGEF1,DNAJA3,IQSEC1,RAB3GAP2,AGFG1,VAV1,RIN3,EVI5,TBC1D1,ARHGA…
GO:MF	nucleoside-triphosphatase regulator activity	GO:0060589	FALSE	0.0013222485700592657	2.878686893974855	499	6180	200	20246	SIPA1L2,EGF,FGD4,RHOH,SIRPA,RASGEF1B,EEF1B2,DOCK4,SH3BP1,BNIP2,LAMTOR2,ARHGAP1,GIT2,TBC1D2,DOCK9,SH2D3C,RP2,VAV3,ARHGAP26,PREX1,PLEKHG3,RANBP3,PLCG1,ARF4,ARFGEF1,ARHGAP27,ABR,SH2D3A,GNA13,RAP1A,IQGAP1,OBSCN,RGS3,LRRK2,SH3BP5L,C9ORF72,TBC1D4,DENND1A,MCF2L,SEC23A,AGAP3,LAMTOR3,ELMOD2,RAPGEF2,PLEKHG4,SEC61B,GRIPAP1,PLEKHG2,RHOF,ARHGDIB,ARHGEF1,DNAJA3,IQSEC1,RAB3GAP2,AGFG1,VAV1,RIN3,EVI5,TBC1D1,ARHGA…
GO:MF	molecular function regulator activity	GO:0098772	FALSE	0.0020549166095661943	2.68720579750571	2195	6180	762	20246	RETN,TIMP2,KCNE1,SIPA1L2,VCAN,SPINK2,HSPH1,LTF,VEGFC,PPP1R17,CDK5R1,FGF9,PRLH,TNFSF13,XCL1,CLEC12B,EGF,TRIB2,FGD4,SERPINB2,PROS1,FAM3B,PGLYRP1,RHOH,NRG1,SIRPA,HTRA1,LTBP1,IRS2,THBS1,HSP90AB1,PPP1R26,SLPI,RPS27L,CLU,PPP4R1,INHBA,SEMA4A,IRGM,SERPING1,PZP,TSHB,RASGEF1B,RPS7,EEF1B2,DOCK4,NAIP,DPP4,SH3BP1,PF4V1,ADM,CABP5,VSTM1,PSMF1,CTSG,PDE6H,MYC,LAMP1,BNIP2,CALM2,COX6A1,LAMTOR2,TNFSF12,YWHAB,CDC42,H…
GO:MF	histone binding	GO:0042393	FALSE	0.0020634771359443146	2.6854003388961996	242	6180	107	20246	KDM7A,MORC4,SRCAP,CBX3,CBX5,KDM4A,PHF2,TRIM24,SETD5,SAP30L,CBX1,NAP1L4,SUPT6H,ING3,SUZ12,JAK2,HDAC2,SCMH1,APBB1,ZMYND8,PYGO2,HDAC4,MLLT6,ING2,TNKS,UIMC1,BRD4,SPIN3,CHD3,MPHOSPH8,HIRA,CBX4,TSPYL2,ASF1A,MLLT1,ANP32A,L3MBTL2,BRD1,THAP7,SCML1,CARM1,FMR1,SART3,ING5,ING1,DPF2,AIRE,BRD3,ZNHIT1,SPTY2D1,CHD7,NAP1L2,PHF13,GLYR1,TBL1X,CHD4,LRWD1,CBX8,TSPYL5,PHC2,COPRS,NCAPG2,BAZ1B,SSRP1,MSH6,PKN1,GRWD1,MCM3…
GO:MF	cytoskeletal protein binding	GO:0008092	FALSE	0.0022007757305642704	2.6574242118496216	1001	6180	370	20246	CACNB2,KLHL20,KCNE1,ARL4C,EVL,HSPH1,CSRP3,PSTPIP2,TUBGCP5,CDK5R1,EML6,KIF3C,FGD4,MYL9,TNNT1,SHTN1,S100B,CYFIP1,HSP90AB1,CENPJ,PTPN4,CLU,HIP1,ABRAXAS1,KIF21A,AFAP1,CCR5,TOR1A,ACTR2,GSK3A,ACTR3,CALM2,MARK3,ARPC2,ARPC3,MARCKSL1,SPTAN1,PAFAH1B1,DIAPH1,PLEC,MAPRE1,CAPZA1,LMO7,KIF5B,APC,ROCK1,RAE1,KIF1C,PXN,MYL12B,NEB,KIFC2,PTPRC,PLEKHG3,PICALM,ARPC5,TNNC1,TOR1AIP1,SSH1,MYO5A,CLIP3,FSCN1,ARL8A,STMN3,AR…
GO:MF	lipid binding	GO:0008289	FALSE	0.002665338538241855	2.5742476211767187	857	6180	321	20246	RORA,FZD5,BPI,PLTP,LTF,SYTL2,TNS2,ALOX15B,PLEKHA1,WIPI1,CD1C,CLEC4E,CAMP,SYP,TLR2,THBS1,SELP,S1PR3,RNASE3,HIP1,SPHK1,GAB2,PLA2G7,EPDR1,DGKA,STARD5,PSMB4,GSTM2,PLEKHA3,EPN1,SNX13,SH3GLB1,ARHGAP26,KCNQ1,S1PR4,PREX1,PICALM,SAP30L,HGS,CD300A,CHMP2A,VPS13B,CLIP3,TMEM199,ACBD5,PLEKHB2,CHMP3,PITPNA,OSBPL8,OSBPL1A,TSPO,PIGU,PDZD8,IQGAP1,NUMA1,SNX10,ESRRA,NR3C1,OXER1,NPC2,OBSCN,ARFIP1,LYN,SNX6,LDLRAP1,RXR…
GO:MF	methylated histone binding	GO:0035064	FALSE	0.0041087855480828345	2.386286525497619	72	6180	40	20246	KDM7A,MORC4,CBX3,CBX5,KDM4A,PHF2,SETD5,CBX1,ING3,SUZ12,ZMYND8,ING2,SPIN3,MPHOSPH8,CBX4,L3MBTL2,THAP7,FMR1,ING5,ING1,PHF13,GLYR1,LRWD1,CBX8,NCAPG2,MSH6,MSL3,NCAPD3,SPIN2B,SPIN1,CBX6,CHD8,ZZZ3,WDR5,RRP8,BPTF,MORC3,SGF29,PHF1,ING4
GO:MF	protein phosphatase binding	GO:0019903	TRUE	0.005395464050648982	2.267971196769916	145	6180	69	20246	STX17,CLEC12B,SKAP1,SIRPA,FCRL3,IRS2,MAPK14,SPHK1,MTMR3,TP53,PXN,PPP1R3E,KCNQ1,MFHAS1,STYXL1,MAP3K5,ANK1,MVP,IQGAP1,PPP1R3D,CDKN1B,CTNNB1,KAT2A,LILRB4,MTMR4,PPP1R10,FCRL2,CD22,PPP1R3B,SNX3,FOXO1,PPP6R1,PPP6R3,TBK1,VCP,AP3B1,LGALS3,LILRB2,SHOC2,IGBP1,PIK3R2,PPP6R2,PPP1R3C,SMG5,MASTL,DYNLT4,MET,JAK1,TRAF2,PTPN1,CDH5,SLC6A3,PPP1CA,MTMR9,ANAPC7,EIF2AK3,KIFAP3,GRIN3A,STAU1,ANKLE2,ADISSP,TPRN,BAD,RACK1…
GO:MF	cell adhesion molecule binding	GO:0050839	FALSE	0.005933291252597736	2.2267043325505558	564	6180	219	20246	OLFM4,TSPAN4,CDK5R1,ITGA2B,SHTN1,NRG1,SIRPA,THBS1,SELP,DSC2,ITGB3,HSP90AB1,S1PR3,PLIN3,S100P,ITGB5,CD177,YWHAB,SPTAN1,PCMT1,PLEC,MMP24,MAPRE1,CAPZA1,ARHGAP1,RTN4,PRDX6,SH3GLB2,KIF5B,TBC1D2,MPP7,DOCK9,EIF4H,SH3GLB1,ITGB2,PICALM,KRT18,FSCN1,HCFC1,CLIC1,LYPLA2,VASP,TXNDC9,IQGAP1,ADAM8,RAB1A,OBSCN,CD46,DCHS1,LYN,RAB10,EHD1,PKN2,HSPA1A,CTNNB1,PAK2,FXYD5,EXOC3,ITGAM,ANXA7,PALLD,NINJ1,LRRC59,TRIM25,HMGB…
GO:MF	GTPase activity	GO:0003924	FALSE	0.006004052265225101	2.2215555358824544	796	6180	298	20246	ARL4C,SIPA1L2,RAB13,RRAGD,EGF,FGD4,RHOH,SIRPA,GUF1,IRGM,RASGEF1B,RAB30,EEF1B2,DOCK4,RAB36,SH3BP1,RRAS2,GNB1,BNIP2,RGS19,LAMTOR2,CDC42,ARHGAP1,GNAI2,GIT2,TBC1D2,DOCK9,SH2D3C,RP2,VAV3,ARHGAP26,GNAI3,RAB2A,PREX1,PLEKHG3,RHEB,RANBP3,PLCG1,RHOQ,GPN3,RAP1B,ARF4,ARL8A,RAB18,ARFGEF1,ARHGAP27,ABR,SEPT6,SH2D3A,GNA13,RAP1A,IQGAP1,RAB7A,ARF5,RAB1A,OBSCN,RGS3,RRAGA,RAB21,LRRK2,RAB10,SH3BP5L,C9ORF72,RAB37,TBC1…
GO:MF	ubiquitin-like protein transferase activity	GO:0019787	FALSE	0.006126500966583938	2.2127874936333467	515	6180	202	20246	KLHL20,RNF144B,RNF175,TRIM71,TRIB2,HECW2,RPS7,SIAH2,RNF135,MED21,TRIP12,UBE2A,CDC42,ANAPC11,RNF139,CUL3,LMO7,FBXO44,RNF181,UBE2K,UBE2D3,FBXL5,SHARPIN,TRIM33,TRIM24,PCGF3,TNFAIP1,ZMIZ1,TRIM41,RNF13,RSPRY1,UBE2R2,TRAF6,MED1,UBE2W,RNF130,FBXL22,MYLIP,RNF141,TRIM28,HECTD3,TRAF7,VPS18,MGRN1,CDKN1B,ATG12,UBE2J1,HDAC4,RING1,XIAP,FBXO11,RNF138,RFFL,RNF38,SYVN1,MED11,PTEN,LRSAM1,RNF145,FBXW11,TRAF3IP2,UBE…
GO:MF	aminoacyltransferase activity	GO:0016755	FALSE	0.006713673535312718	2.173039780940161	533	6180	208	20246	KLHL20,RNF144B,RNF175,TRIM71,TRIB2,HECW2,F13A1,RPS7,SIAH2,RNF135,MED21,TRIP12,UBE2A,CDC42,ANAPC11,RNF139,CUL3,LMO7,FBXO44,RNF181,UBE2K,UBE2D3,FBXL5,SHARPIN,TRIM33,TRIM24,PCGF3,TNFAIP1,ZMIZ1,TRIM41,RNF13,RSPRY1,UBE2R2,TRAF6,MED1,UBE2W,RNF130,FBXL22,MYLIP,RNF141,TRIM28,HECTD3,TRAF7,VPS18,MGRN1,CDKN1B,ATG12,UBE2J1,HDAC4,GGT7,RING1,XIAP,FBXO11,RNF138,RFFL,RNF38,SYVN1,MED11,PTEN,LRSAM1,RNF145,FBXW11,T…
GO:MF	ubiquitin-protein transferase activity	GO:0004842	FALSE	0.007856284595317608	2.1047827925406963	485	6180	191	20246	KLHL20,RNF144B,RNF175,TRIM71,TRIB2,HECW2,RPS7,SIAH2,RNF135,MED21,TRIP12,UBE2A,CDC42,ANAPC11,RNF139,CUL3,LMO7,FBXO44,RNF181,UBE2K,UBE2D3,FBXL5,SHARPIN,TRIM33,TRIM24,PCGF3,TNFAIP1,TRIM41,RNF13,RSPRY1,UBE2R2,TRAF6,MED1,UBE2W,RNF130,FBXL22,MYLIP,RNF141,TRIM28,HECTD3,TRAF7,VPS18,MGRN1,CDKN1B,UBE2J1,RING1,XIAP,FBXO11,RNF138,RFFL,RNF38,SYVN1,MED11,PTEN,LRSAM1,RNF145,FBXW11,TRAF3IP2,UBE4B,MED30,MKRN1,TRI…
GO:MF	GTP binding	GO:0005525	FALSE	0.009218963740475934	2.0353178931639078	614	6180	235	20246	ARL4C,RAB13,RRAGD,EGF,FGD4,GIMAP5,RHOH,TUBE1,GUF1,AK3,IRGM,RASGEF1B,RAB30,EEF1B2,DOCK4,RAB36,RRAS2,GIMAP2,LAMTOR2,CDC42,ERAL1,GNAI2,DOCK9,SH2D3C,RP2,VAV3,GNAI3,MFHAS1,FPGT,RAB2A,PREX1,PLEKHG3,TUBG2,RHEB,PLCG1,RHOQ,GPN3,RAP1B,ARF4,ARL8A,RAB18,NPR2,ARFGEF1,ABR,SEPT6,SH2D3A,GNA13,RAP1A,RAB7A,ARF5,RAB1A,OBSCN,RRAGA,RAB21,LRRK2,RAB10,EHD1,SH3BP5L,C9ORF72,RAB37,DRG2,RAB35,DENND1A,RAB2B,MCF2L,AGAP3,ARL1…
GO:BP	protein metabolic process	GO:0019538	TRUE	1.4468898772602051e-62	61.83956452176153	4721	6042	1835	21026	GZMK,MMP8,IRAK3,ITM2A,TIMP2,PYHIN1,DCAF16,TPST1,HPR,RPL9,PLOD2,KLHL20,FKBP5,PTX3,CCT2,ERAP2,NDST1,IGF1R,XPO1,TTC36,ELAC1,CLEC3B,S100A12,HSPH1,GADD45A,LTF,HP,HAX1,TNIK,RNF144B,ASPH,RNF175,TRIM71,C1RL,TNS2,NDUFS4,CDK5R1,ELANE,OTUD3,MAP3K15,CEBPA,FGF9,RPLP0,CHST13,NSG1,GALNT11,MAML1,ST3GAL6,MAP3K21,PPM1K,RPS3A,EGF,TRIB2,PRKACB,HINT1,SRPK1,MMP9,CTSD,FKBP9,CAMP,FUT8,NRG1,ALAS2,SIRPA,ZDHHC19,EPHA4,HTRA…
GO:BP	positive regulation of biological process	GO:0048518	FALSE	1.7123789076270964e-51	50.76640013026402	6264	6042	2273	21026	RETN,MAFG,GPR18,MMP8,GRB10,HK2,IRAK3,CACNB2,IKZF3,PFKFB2,SH2D1A,OLFM4,PYHIN1,CD3G,IL7R,RORA,KCNE1,PTX3,CCT2,NDST1,KLF12,CEACAM6,TSHZ3,FZD5,IGF1R,CLEC3B,HLA-DPB1,VCAN,ARG1,S100A12,LCN2,PNPLA2,EVL,HSPH1,GADD45A,PLTP,LTF,VEGFC,PRKAB2,BCL7A,CSRP3,LHFPL2,HAX1,TNIK,ASPH,EOMES,ABCD2,TRIM71,C1RL,ALOX15B,CDK5R1,ELANE,CEBPA,FGF9,GP6,GPR174,PLEKHA1,TGFBR3,ABAT,OCIAD2,NSG1,WIPI1,CD1C,MAML1,ATXN1L,CD8A,ORM2,C…
GO:BP	positive regulation of cellular process	GO:0048522	FALSE	5.923987487535296e-50	49.22738586745335	5920	6042	2160	21026	RETN,MAFG,GPR18,MMP8,GRB10,IRAK3,CACNB2,IKZF3,PFKFB2,SH2D1A,OLFM4,PYHIN1,IL7R,RORA,KCNE1,PTX3,CCT2,NDST1,KLF12,CEACAM6,TSHZ3,FZD5,IGF1R,CLEC3B,HLA-DPB1,VCAN,ARG1,S100A12,LCN2,PNPLA2,EVL,HSPH1,GADD45A,LTF,VEGFC,PRKAB2,BCL7A,CSRP3,HAX1,TNIK,ASPH,EOMES,ABCD2,TRIM71,ALOX15B,CDK5R1,ELANE,CEBPA,FGF9,GP6,GPR174,TGFBR3,ABAT,OCIAD2,NSG1,WIPI1,CD1C,MAML1,ATXN1L,ORM2,CLEC4E,TNFSF13,CLEC5A,RRAGD,CES1,XCL1,IT…
GO:BP	response to stimulus	GO:0050896	FALSE	1.1464305668498002e-44	43.94065224302486	8999	6042	3059	21026	RETN,GPR18,MMP8,MTARC1,GRB10,HK2,APCDD1,TRAV16,GPR171,IRAK3,TRAV5,ITM2A,IKZF3,TIMP2,PFKFB2,KLRB1,SH2D1A,OLFM4,PYHIN1,CD3G,KLRG1,IL7R,CEACAM8,RORA,PLOD2,KLHL20,FKBP5,KCNE1,PTX3,ERAP2,MGST1,NDST1,DAO,FZD5,FCER1A,SIPA1L2,LTB4R,IGF1R,TTC36,CHIT1,HLA-DPB1,ARG1,SLC28A3,TRGC2,S100A12,LCN2,EVL,BPI,HSPH1,GADD45A,LTF,VEGFC,PRKAB2,BCL7A,CSRP3,HP,HAX1,TNIK,CRISP3,ASPH,OLFML2A,EOMES,RNF175,ABCD2,TRGV9,TRIM71,…
GO:BP	regulation of response to stimulus	GO:0048583	FALSE	1.1590723850824144e-43	42.9358894411199	3993	6042	1525	21026	GPR18,MMP8,GRB10,APCDD1,IRAK3,KLRB1,SH2D1A,PYHIN1,CD3G,IL7R,RORA,NDST1,FZD5,FCER1A,SIPA1L2,IGF1R,HLA-DPB1,ARG1,S100A12,GADD45A,LTF,VEGFC,BCL7A,HAX1,TNIK,C1RL,TNS2,ALOX15B,ELANE,OTUD3,CEBPA,FGF9,GP6,GPR174,PLEKHA1,TGFBR3,ABAT,KREMEN1,OCIAD2,THEM4,GALNT11,CD1C,CD8A,CLEC4E,TNFSF13,RRAGD,XCL1,SH2B2,CLEC12B,EGF,FGD4,SERPINB2,PRKACB,MARCO,TNNT1,PROS1,HINT1,MAOA,SKAP1,RPF2,MMP9,CTSD,SYP,PGLYRP1,RHOH,FUT…
GO:BP	transport	GO:0006810	FALSE	1.5031703757947356e-41	40.82299179181896	4407	6042	1648	21026	RETN,GRB10,HK2,CACNB2,PFKFB2,STX17,CD3G,KLHL20,KCNE1,ARL4C,PTX3,MGST1,FCER1A,IGF1R,XPO1,SLC28A3,LCN2,KCNA3,TCN1,PLTP,LTF,SYTL2,VEGFC,ASPH,ABCD2,NDUFS4,CDK5R1,ELANE,RHD,FGF9,SORT1,TRPM2,RAB13,ABAT,ADORA3,OCIAD2,THEM4,NSG1,WIPI1,PPM1K,CES1,XCL1,CD163,CLIC4,ABCC2,CYBRD1,REPS2,EGF,MARCO,IFT56,FAM3B,MMP9,SLC22A14,SYP,RHOH,NRG1,SIRPA,THOC1,ANO10,RHCE,TLR2,CYFIP1,FOLR3,FCRL3,OLR1,SEC31B,IRS2,SLC23A1,THB…
GO:BP	response to stress	GO:0006950	FALSE	1.8903261029520446e-41	40.72346326858022	3948	6042	1501	21026	MMP8,MTARC1,HK2,IRAK3,KLRB1,SH2D1A,PYHIN1,KLRG1,IL7R,RORA,PLOD2,PTX3,MGST1,NDST1,DAO,FCER1A,LTB4R,IGF1R,ARG1,S100A12,LCN2,BPI,HSPH1,GADD45A,LTF,VEGFC,BCL7A,CSRP3,HP,CRISP3,RNF175,ABCD2,TRGV9,C1RL,RNASE1,DEFA4,ELANE,CEBPA,TRGV5,CLEC1B,GP6,TRPM2,PLEKHA1,TGFBR3,ABAT,ADORA3,KREMEN1,WIPI1,ORM2,CLEC4E,AGTRAP,CLEC5A,RRAGD,XCL1,CD163,MPO,CLEC12B,SERPINB2,LY9,MARCO,MYL9,PROS1,SRPK1,DDX17,MMP9,CAMP,PGLYRP1…
GO:BP	biological regulation	GO:0065007	FALSE	1.3624198195901776e-37	36.86568904716815	12743	6042	4087	21026	RETN,MAFG,GPR18,TDRD9,MMP8,GRB10,HK2,APCDD1,GPR171,IRAK3,CACNB2,ITM2A,IKZF3,TIMP2,PFKFB2,KLRB1,SH2D1A,OLFM4,PYHIN1,CD3G,ZNF134,KLRG1,IL7R,RORA,KLHL20,KCNE1,PTX3,CCT2,ERAP2,NDST1,KLF12,CEACAM6,TSHZ3,FZD5,FCER1A,SIPA1L2,LTB4R,IGF1R,XPO1,TTC36,ATF7IP2,CLEC3B,HLA-DPB1,VCAN,ARG1,S100A12,LCN2,PNPLA2,EVL,DLGAP3,BPI,HSPH1,GADD45A,KCNA3,ZNF141,PLTP,LTF,VEGFC,PRKAB2,BCL7A,CSRP3,HP,LHFPL2,HAX1,TNIK,RNF144B,…
GO:BP	catabolic process	GO:0009056	FALSE	2.4594448926444793e-36	35.60916290398025	2639	6042	1052	21026	MMP8,HK2,IRAK3,TIMP2,PFKFB2,STX17,PYHIN1,KLHL20,ERAP2,DAO,FZD5,PLBD1,XPO1,TTC36,CHIT1,ARG1,PNPLA2,HP,HAX1,RNF144B,RNF175,ABCD2,TRIM71,CDK5R1,ELANE,CEBPA,ABAT,WIPI1,PPM1K,RRAGD,CES1,MPO,ABCC2,EGF,TRIB2,CRAT,HINT1,MAOA,MMP9,CTSD,PGLYRP1,FUT8,ZDHHC19,EPHA4,ECHDC2,CYP1B1,IRS2,MAPK14,ANKRD9,HSP90AB1,GZMA,HECW2,BDH2,CLU,INHBA,TBX21,RNASE3,IFI27,HPSE,IRGM,SLC7A5,SPHK1,RPS7,ABCD1,SIAH2,NCEH1,TKTL1,AKR1C3…
GO:BP	localization	GO:0051179	FALSE	7.958843783010659e-36	35.09915001959029	5555	6042	1979	21026	RETN,GRB10,HK2,CACNB2,PFKFB2,STX17,PYHIN1,CD3G,KLHL20,KCNE1,ARL4C,PTX3,CCT2,MGST1,FZD5,FCER1A,IGF1R,XPO1,SLC28A3,LCN2,PNPLA2,KCNA3,TCN1,PLTP,LTF,SYTL2,VEGFC,CSRP3,HAX1,TNIK,ASPH,ABCD2,MIS18A,NDUFS4,CDK5R1,ELANE,RHD,FGF9,SORT1,TRPM2,PLEKHA1,RAB13,ABAT,ADORA3,OCIAD2,THEM4,NSG1,WIPI1,PPM1K,RRAGD,CES1,XCL1,CD163,CLIC4,ABCC2,CYBRD1,REPS2,EGF,MARCO,IFT56,SKAP1,RPF2,FAM3B,MMP9,CTSD,SLC22A14,SYP,RHOH,NRG…
GO:BP	regulation of primary metabolic process	GO:0080090	FALSE	4.887657342745399e-35	34.31089924862703	5390	6042	1924	21026	MAFG,GRB10,IRAK3,ITM2A,IKZF3,TIMP2,PYHIN1,ZNF134,IL7R,RORA,PTX3,CCT2,KLF12,TSHZ3,FZD5,IGF1R,XPO1,TTC36,ATF7IP2,CLEC3B,S100A12,PNPLA2,GADD45A,ZNF141,LTF,BCL7A,CSRP3,HAX1,TNIK,ASPH,EOMES,ABCD2,TRIM71,NDUFS4,CDK5R1,ELANE,CEBPA,FGF9,ABAT,ADORA3,ZNF527,MAML1,ZNF22,ATXN1L,TNFSF13,CES1,XCL1,EGF,TRIB2,KDM7A,PRKACB,HINT1,SRPK1,DDX17,SKAP1,MMP9,RHOH,NRG1,SIRPA,TCF4,EPHA4,ZNF566,PIWIL4,TLR2,CYFIP1,CYP1B1,ZN…
GO:BP	regulation of biological process	GO:0050789	FALSE	9.722407836762796e-35	34.012226165040886	12336	6042	3958	21026	RETN,MAFG,GPR18,TDRD9,MMP8,GRB10,HK2,APCDD1,GPR171,IRAK3,CACNB2,ITM2A,IKZF3,TIMP2,PFKFB2,KLRB1,SH2D1A,OLFM4,PYHIN1,CD3G,ZNF134,KLRG1,IL7R,RORA,KLHL20,KCNE1,PTX3,CCT2,NDST1,KLF12,CEACAM6,TSHZ3,FZD5,FCER1A,SIPA1L2,LTB4R,IGF1R,XPO1,TTC36,ATF7IP2,CLEC3B,HLA-DPB1,VCAN,ARG1,S100A12,LCN2,PNPLA2,EVL,DLGAP3,BPI,HSPH1,GADD45A,ZNF141,PLTP,LTF,VEGFC,PRKAB2,BCL7A,CSRP3,HP,LHFPL2,HAX1,TNIK,RNF144B,ASPH,OLFML2A…
GO:BP	regulation of cellular process	GO:0050794	FALSE	3.0227519600772615e-34	33.519597488544754	11946	6042	3846	21026	RETN,MAFG,GPR18,TDRD9,MMP8,GRB10,HK2,APCDD1,GPR171,IRAK3,CACNB2,ITM2A,IKZF3,TIMP2,PFKFB2,KLRB1,SH2D1A,OLFM4,PYHIN1,CD3G,ZNF134,KLRG1,IL7R,RORA,KLHL20,KCNE1,PTX3,CCT2,NDST1,KLF12,CEACAM6,TSHZ3,FZD5,FCER1A,SIPA1L2,LTB4R,IGF1R,XPO1,TTC36,ATF7IP2,CLEC3B,HLA-DPB1,VCAN,ARG1,S100A12,LCN2,PNPLA2,EVL,DLGAP3,BPI,HSPH1,GADD45A,ZNF141,LTF,VEGFC,PRKAB2,BCL7A,CSRP3,HP,HAX1,TNIK,RNF144B,ASPH,OLFML2A,EOMES,ABCD2…
GO:BP	organelle organization	GO:0006996	FALSE	5.0867418083285945e-34	33.293560305628695	3594	6042	1354	21026	TDRD9,HK2,STX17,KLHL20,KCNE1,CCT2,XPO1,TTC36,ELAC1,SPINK2,PNPLA2,EVL,GADD45A,BCL7A,CSRP3,HAX1,TNIK,PSTPIP2,TUBGCP5,ABCD2,MIS18A,NME7,NDUFS4,CDK5R1,CEBPA,SORT1,RPLP0,PGM5,TRPM2,RAB13,THEM4,WIPI1,GALNT11,IQCB1,PPM1K,CLIC4,SH2B2,RSPH9,EGF,FGD4,IFT56,MYL9,TNNT1,SRPK1,RPF2,MMP9,SHTN1,CTSD,SYP,RHOH,TUBE1,CYFIP1,SEC31B,ITGB3,HSP90AB1,ACTR6,CENPJ,GEN1,TESMIN,HECW2,RPS27L,CLU,ATP8B4,HIP1,ABRAXAS1,IRGM,SPH…
GO:BP	intracellular signal transduction	GO:0035556	FALSE	1.526491507818467e-33	32.81630560742679	2965	6042	1148	21026	GPR18,GRB10,IRAK3,RORA,NDST1,SIPA1L2,IGF1R,S100A12,GADD45A,LTF,CSRP3,HAX1,TNIK,ASPH,ALOX15B,PPP1R17,ELANE,OTUD3,MAP3K15,CEBPA,FGF9,GPR174,TRPM2,PLEKHA1,RAB13,TGFBR3,THEM4,MAP3K21,RRAGD,SH2B2,EGF,FGD4,PRKACB,MARCO,PROS1,HINT1,SRPK1,DDX17,RPF2,MMP9,SHTN1,RHOH,NRG1,SIRPA,KIAA0319,S100B,CXCR6,EPHA4,PAK1IP1,TLR2,CYFIP1,CYP1B1,FCRL3,IRS2,THBS1,DUSP5,MAPK14,SELP,PEAR1,ITGB3,AZU1,GEN1,RPS27L,CLU,INHBA,C3…
GO:BP	programmed cell death	GO:0012501	FALSE	4.1647759454785616e-33	32.38040835758484	1987	6042	820	21026	HK2,IKZF3,CD3G,IL7R,KLHL20,CEACAM6,FZD5,IGF1R,ARG1,LCN2,GADD45A,LTF,HAX1,RNF144B,ALOX15B,CDK5R1,SORT1,KREMEN1,THEM4,NSG1,PPM1K,CLEC5A,MPO,RPS3A,SERPINB2,HINT1,FAM3B,MMP9,CTSD,NRG1,THOC1,EPHA4,HTRA1,TLR2,CYP1B1,IRS2,THBS1,MAPK14,ITGB3,AZU1,HSP90AB1,GZMA,RPS27L,CLU,INHBA,MORF4L2,HIP1,GBE1,IFI27,SLC7A5,SPHK1,AQP1,RPS7,FOXQ1,F2RL1,SIAH2,NAIP,PDK4,G6PD,NDUFAF4,AKR1C3,ADM,CFDP1,CCR5,GRINA,MYC,PLAGL1,BM…
GO:BP	cell death	GO:0008219	FALSE	5.224125155385023e-33	32.28198642713076	1991	6042	821	21026	HK2,IKZF3,CD3G,IL7R,KLHL20,CEACAM6,FZD5,IGF1R,ARG1,LCN2,GADD45A,LTF,HAX1,RNF144B,ALOX15B,CDK5R1,SORT1,KREMEN1,THEM4,NSG1,PPM1K,CLEC5A,MPO,RPS3A,SERPINB2,HINT1,FAM3B,MMP9,CTSD,NRG1,THOC1,EPHA4,HTRA1,TLR2,CYP1B1,IRS2,THBS1,MAPK14,ITGB3,AZU1,HSP90AB1,GZMA,RPS27L,CLU,INHBA,MORF4L2,HIP1,GBE1,IFI27,SLC7A5,SPHK1,AQP1,RPS7,FOXQ1,F2RL1,SIAH2,NAIP,PDK4,G6PD,NDUFAF4,AKR1C3,ADM,CFDP1,CCR5,GRINA,MYC,PLAGL1,BM…
GO:BP	cellular response to stimulus	GO:0051716	FALSE	6.24439660283561e-33	32.20450952121612	7376	6042	2515	21026	RETN,GPR18,MMP8,MTARC1,GRB10,APCDD1,GPR171,IRAK3,KLRB1,SH2D1A,OLFM4,CD3G,KLRG1,IL7R,RORA,KCNE1,MGST1,NDST1,FZD5,FCER1A,SIPA1L2,LTB4R,IGF1R,HLA-DPB1,ARG1,SLC28A3,S100A12,EVL,BPI,GADD45A,LTF,VEGFC,PRKAB2,BCL7A,CSRP3,HP,HAX1,TNIK,ASPH,OLFML2A,RNF175,TRIM71,TNS2,ALOX15B,PPP1R17,DEFA4,CDK5R1,ELANE,OTUD3,MAP3K15,CEBPA,CLEC1B,FGF9,GP6,GPR174,SORT1,MS4A7,TRPM2,PLEKHA1,RAB13,TGFBR3,ABAT,ADORA3,KREMEN1,OCI…
GO:BP	establishment of localization	GO:0051234	FALSE	9.079689189770954e-33	32.04192901772095	4928	6042	1769	21026	RETN,GRB10,HK2,CACNB2,PFKFB2,STX17,CD3G,KLHL20,KCNE1,ARL4C,PTX3,MGST1,FZD5,FCER1A,IGF1R,XPO1,SLC28A3,LCN2,KCNA3,TCN1,PLTP,LTF,SYTL2,VEGFC,HAX1,ASPH,ABCD2,NDUFS4,CDK5R1,ELANE,RHD,FGF9,SORT1,TRPM2,PLEKHA1,RAB13,ABAT,ADORA3,OCIAD2,THEM4,NSG1,WIPI1,PPM1K,CES1,XCL1,CD163,CLIC4,ABCC2,CYBRD1,REPS2,EGF,MARCO,IFT56,FAM3B,MMP9,CTSD,SLC22A14,SYP,RHOH,NRG1,SIRPA,ZDHHC19,THOC1,ANO10,RHCE,TLR2,CYFIP1,LTBP1,FOL…
GO:BP	regulation of signaling	GO:0023051	FALSE	1.4352808409577072e-32	31.843063112348275	3478	6042	1310	21026	RETN,GPR18,MMP8,GRB10,APCDD1,IRAK3,PFKFB2,SH2D1A,IL7R,RORA,NDST1,TSHZ3,SIPA1L2,IGF1R,ARG1,S100A12,DLGAP3,GADD45A,LTF,VEGFC,HAX1,TNIK,TNS2,ALOX15B,ELANE,OTUD3,FGF9,GPR174,PLEKHA1,TGFBR3,ABAT,ADORA3,KREMEN1,OCIAD2,THEM4,NSG1,GALNT11,RRAGD,SH2B2,CLEC12B,EGF,FGD4,PRKACB,MARCO,PROS1,HINT1,MAOA,RPF2,MMP9,CTSD,SYP,RHOH,NRG1,SIRPA,KIAA0319,S100B,EPHA4,HTRA1,PAK1IP1,TLR2,CYFIP1,LTBP1,CYP1B1,FCRL3,IRS2,THB…
GO:BP	regulation of cell communication	GO:0010646	FALSE	1.9042105449052776e-32	31.720285034189317	3486	6042	1312	21026	RETN,GPR18,MMP8,GRB10,APCDD1,IRAK3,PFKFB2,SH2D1A,IL7R,RORA,NDST1,TSHZ3,SIPA1L2,IGF1R,ARG1,S100A12,DLGAP3,GADD45A,LTF,VEGFC,HAX1,TNIK,ASPH,TNS2,ALOX15B,ELANE,OTUD3,FGF9,GPR174,PLEKHA1,TGFBR3,ABAT,ADORA3,KREMEN1,OCIAD2,THEM4,NSG1,GALNT11,RRAGD,SH2B2,CLEC12B,EGF,FGD4,PRKACB,MARCO,PROS1,HINT1,MAOA,RPF2,MMP9,CTSD,SYP,RHOH,NRG1,SIRPA,KIAA0319,S100B,EPHA4,HTRA1,PAK1IP1,TLR2,CYFIP1,LTBP1,CYP1B1,FCRL3,IRS…
GO:BP	intracellular transport	GO:0046907	FALSE	1.750745174585137e-31	30.756777061983506	1381	6042	604	21026	STX17,KLHL20,ARL4C,XPO1,SYTL2,ASPH,ABCD2,FGF9,SORT1,RAB13,NSG1,WIPI1,CES1,REPS2,IFT56,THOC1,SEC31B,MAPK14,SDAD1,CLU,IFI27,IRGM,KIF21A,KPNA3,ABCD1,CLTCL1,DNAJC6,CD63,LAMP1,ACTR2,HERPUD1,COPB2,PPP6C,CDC42,HYOU1,PIK3C3,SCYL2,SEC13,PAFAH1B1,UFD1L,TP53,TIMM8B,RNF139,ARHGAP1,CUL3,AAAS,COPB1,HDAC3,KIF5B,TMEM30A,KPNB1,NAPG,VTI1A,RAE1,KIF1C,SLU7,PLEKHA3,AP1G2,SNX13,YTHDC1,EXOC6,STXBP3,EDEM1,REEP5,TOMM20L,…
GO:BP	positive regulation of metabolic process	GO:0009893	FALSE	4.670451811329688e-31	30.330641104513955	3597	6042	1341	21026	MAFG,MMP8,GRB10,IRAK3,IKZF3,PYHIN1,IL7R,RORA,PTX3,CCT2,KLF12,FZD5,IGF1R,CLEC3B,HLA-DPB1,S100A12,LCN2,PNPLA2,HSPH1,GADD45A,LTF,PRKAB2,BCL7A,CSRP3,HAX1,TNIK,ASPH,EOMES,ABCD2,TRIM71,ALOX15B,ELANE,CEBPA,FGF9,TGFBR3,ABAT,NSG1,WIPI1,MAML1,ORM2,CLEC4E,TNFSF13,CLEC5A,CES1,XCL1,EGF,TRIB2,KDM7A,LY9,DDX17,SKAP1,MMP9,NRG1,SIRPA,TCF4,ZDHHC19,EPHA4,BTN3A2,TLR2,CYP1B1,IRS2,THBS1,TIGIT,MAPK14,CD83,ITGB3,ZNF473,A…
GO:BP	establishment of localization in cell	GO:0051649	FALSE	1.662145289983437e-30	29.77933101672505	2010	6042	818	21026	STX17,KLHL20,ARL4C,FCER1A,XPO1,SYTL2,ASPH,ABCD2,CDK5R1,FGF9,SORT1,RAB13,NSG1,WIPI1,CES1,CYBRD1,REPS2,IFT56,SYP,NRG1,THOC1,CYFIP1,SEC31B,MAPK14,SDAD1,ITGB3,CLU,ABCA13,HIP1,IFI27,ABRAXAS1,ATP7B,IRGM,KIF21A,AQP1,KPNA3,GAB2,ABCD1,F2RL1,CD177,MCTP1,CLTCL1,CDCA8,DNAJC6,INSC,CD63,TOR1A,LAMP1,ACTR2,HERPUD1,CALM2,COPB2,PPP6C,ARPC3,ATP6V1D,CDC42,HYOU1,PIK3C3,SCYL2,SEC13,PAFAH1B1,UFD1L,TP53,TIMM8B,MAPRE1,RN…
GO:BP	apoptotic process	GO:0006915	FALSE	2.2099404275228106e-30	29.655619433259155	1923	6042	788	21026	HK2,IKZF3,CD3G,IL7R,KLHL20,CEACAM6,FZD5,IGF1R,LCN2,GADD45A,LTF,HAX1,RNF144B,ALOX15B,CDK5R1,SORT1,KREMEN1,THEM4,NSG1,PPM1K,CLEC5A,MPO,RPS3A,SERPINB2,HINT1,FAM3B,MMP9,CTSD,NRG1,THOC1,EPHA4,HTRA1,TLR2,CYP1B1,IRS2,THBS1,MAPK14,ITGB3,AZU1,HSP90AB1,GZMA,RPS27L,CLU,INHBA,MORF4L2,HIP1,GBE1,IFI27,SLC7A5,SPHK1,AQP1,RPS7,FOXQ1,SIAH2,NAIP,PDK4,G6PD,NDUFAF4,AKR1C3,ADM,CFDP1,CCR5,GRINA,MYC,PLAGL1,BMX,GSK3A,BNI…
GO:BP	nitrogen compound transport	GO:0071705	FALSE	7.409987378128626e-30	29.130182531779614	1923	6042	786	21026	PFKFB2,STX17,CD3G,KLHL20,ARL4C,MGST1,XPO1,SLC28A3,TCN1,PLTP,SYTL2,VEGFC,ASPH,RHD,FGF9,SORT1,RAB13,ABAT,ADORA3,NSG1,ABCC2,IFT56,FAM3B,SLC22A14,THOC1,RHCE,TLR2,FOLR3,SEC31B,IRS2,SLC23A1,SLC22A15,MAPK14,SDAD1,ITGB3,CLU,CR1,ABCA13,HIP1,IFI27,HPSE,IRGM,SLC7A5,SUCNR1,AQP1,KPNA3,ABCD1,F2RL1,RAB36,SLC22A16,SLC25A40,ABCB1,CLTCL1,CD63,TOR1A,HERPUD1,COPB2,CDC42,PIK3C3,SLC7A6,SEC13,OLFM2,PAFAH1B1,UFD1L,TP53,…
GO:BP	regulation of signal transduction	GO:0009966	FALSE	1.2589745727002e-29	28.899983041176895	3034	6042	1153	21026	GPR18,MMP8,GRB10,APCDD1,IRAK3,SH2D1A,IL7R,RORA,NDST1,SIPA1L2,IGF1R,ARG1,S100A12,GADD45A,LTF,VEGFC,HAX1,TNIK,TNS2,ALOX15B,ELANE,OTUD3,FGF9,GPR174,PLEKHA1,TGFBR3,ABAT,KREMEN1,OCIAD2,THEM4,GALNT11,RRAGD,SH2B2,CLEC12B,EGF,FGD4,PRKACB,MARCO,PROS1,HINT1,MAOA,RPF2,MMP9,CTSD,SYP,RHOH,NRG1,SIRPA,KIAA0319,S100B,EPHA4,HTRA1,PAK1IP1,TLR2,CYFIP1,LTBP1,CYP1B1,FCRL3,IRS2,THBS1,DUSP5,MAPK14,SELP,ITGB3,HSP90AB1,C…
GO:BP	macromolecule modification	GO:0043412	FALSE	4.825322925982375e-29	28.316473616977333	3030	6042	1149	21026	IRAK3,DCAF16,TPST1,PLOD2,KLHL20,IGF1R,TTC36,S100A12,GADD45A,LTF,HAX1,TNIK,RNF144B,ASPH,TRIM71,TNS2,NDUFS4,CDK5R1,ELANE,OTUD3,MAP3K15,FGF9,OSGEPL1,GALNT11,MAML1,ST3GAL6,MAP3K21,PPM1K,EGF,TRIB2,PRKACB,HINT1,SRPK1,MMP9,FUT8,NRG1,SIRPA,ZDHHC19,EPHA4,TLR2,CYP1B1,THBS1,DUSP5,B4GALT5,MAPK14,ANKRD9,ITGB3,HSP90AB1,HECW2,NMT2,AATK,PTPN4,F13A1,PPP4R1,IFI27,ABRAXAS1,IRGM,NUAK1,SPHK1,CEP78,PADI4,RPS7,SIAH2,RN…
GO:BP	vesicle-mediated transport	GO:0016192	FALSE	1.3026533185537853e-28	27.885171149807114	1592	6042	668	21026	STX17,KLHL20,ARL4C,PTX3,FCER1A,IGF1R,SYTL2,CDK5R1,ELANE,SORT1,RAB13,OCIAD2,NSG1,WIPI1,CES1,CD163,REPS2,EGF,MARCO,SYP,RHOH,NRG1,SIRPA,TLR2,CYFIP1,OLR1,SEC31B,THBS1,PEAR1,ITGB3,AZU1,CLU,ABCA13,ASGR2,HIP1,SPHK1,PLIN3,RAB30,GAB2,F2RL1,DPP4,RAB36,SH3BP1,CD177,CEBPE,ADM,MCTP1,CLTCL1,DNAJC6,CD63,TOR1A,LAMP1,CALM2,COPB2,PPP6C,ARPC3,ATP6V1D,CDC42,HYOU1,PIK3C3,SCYL2,SEC13,RNF139,ARHGAP1,CUL3,COPB1,GNAI2,GI…
GO:BP	immune system process	GO:0002376	FALSE	4.296003803358109e-28	27.366935342816717	2871	6042	1093	21026	GPR18,MMP8,TRAV16,GPR171,IRAK3,TRAV5,ITM2A,IKZF3,KLRB1,SH2D1A,PYHIN1,CD3G,ZNF134,KLRG1,IL7R,CEACAM8,RORA,PTX3,ERAP2,DAO,FZD5,FCER1A,LTB4R,IGF1R,CHIT1,HLA-DPB1,ARG1,TRGC2,S100A12,LCN2,BPI,HSPH1,LTF,VEGFC,HP,HAX1,CRISP3,EOMES,TRGV9,C1RL,DEFA4,ELANE,CEBPA,TRGV5,GP6,GPR174,TRPM2,PLEKHA1,TGFBR3,TRAV12-2,CD1C,CD8A,ORM2,CLEC4E,TNFSF13,CLEC5A,XCL1,MPO,SH2B2,CLEC12B,ITGA2B,LY9,MARCO,HSD3B7,TRAV12-3,SRPK1,…
GO:BP	regulation of intracellular signal transduction	GO:1902531	FALSE	5.136913712446516e-28	27.2892977292967	1953	6042	789	21026	GPR18,IRAK3,RORA,NDST1,SIPA1L2,IGF1R,S100A12,GADD45A,LTF,HAX1,TNIK,ALOX15B,ELANE,OTUD3,FGF9,GPR174,PLEKHA1,TGFBR3,THEM4,RRAGD,SH2B2,EGF,FGD4,PRKACB,MARCO,PROS1,HINT1,RPF2,MMP9,RHOH,NRG1,SIRPA,KIAA0319,S100B,EPHA4,PAK1IP1,TLR2,FCRL3,IRS2,THBS1,DUSP5,MAPK14,SELP,ITGB3,GEN1,CLU,INHBA,HIP1,HPSE,IRGM,NUAK1,SPHK1,RPS7,F2RL1,NAIP,SH3BP1,AKR1C3,SCAI,GRINA,CDCA8,PDE6H,MYC,GSK3A,WAC,HERPUD1,CTBP2,CALM2,MAR…
GO:BP	protein transport	GO:0015031	FALSE	7.210138017499929e-28	27.14205642187351	1444	6042	614	21026	PFKFB2,STX17,CD3G,KLHL20,ARL4C,XPO1,SYTL2,VEGFC,ASPH,FGF9,SORT1,RAB13,ABAT,NSG1,IFT56,FAM3B,TLR2,SEC31B,IRS2,MAPK14,SDAD1,CLU,HIP1,IFI27,HPSE,IRGM,SUCNR1,KPNA3,F2RL1,RAB36,CLTCL1,CD63,HERPUD1,COPB2,CDC42,PIK3C3,SEC13,OLFM2,PAFAH1B1,UFD1L,TP53,TIMM8B,ARHGAP1,AAAS,COPB1,HDAC3,KIF5B,TMEM30A,KPNB1,NAPG,VTI1A,RP2,SERP1,PCSK5,SLU7,AP1G2,SNX13,EXOC6,STXBP3,EDEM1,TOMM20L,TSG101,TMEM167A,RAB2A,RILPL2,CNIH…
GO:BP	protein modification process	GO:0036211	FALSE	1.7889179459964544e-27	26.7474095791745	2846	6042	1082	21026	IRAK3,DCAF16,TPST1,PLOD2,KLHL20,IGF1R,TTC36,S100A12,GADD45A,LTF,HAX1,TNIK,RNF144B,ASPH,TRIM71,TNS2,NDUFS4,CDK5R1,ELANE,OTUD3,MAP3K15,FGF9,GALNT11,MAML1,ST3GAL6,MAP3K21,PPM1K,EGF,TRIB2,PRKACB,HINT1,SRPK1,MMP9,FUT8,NRG1,SIRPA,ZDHHC19,EPHA4,TLR2,THBS1,DUSP5,B4GALT5,MAPK14,ANKRD9,ITGB3,HSP90AB1,HECW2,NMT2,AATK,PTPN4,F13A1,PPP4R1,IFI27,ABRAXAS1,IRGM,NUAK1,SPHK1,CEP78,PADI4,RPS7,SIAH2,RNF135,G6PD,MTMR3…
GO:BP	positive regulation of macromolecule metabolic process	GO:0010604	FALSE	2.4196949875799972e-26	25.61623937515984	3288	6042	1219	21026	MAFG,MMP8,IRAK3,IKZF3,PYHIN1,IL7R,RORA,CCT2,KLF12,FZD5,IGF1R,CLEC3B,HLA-DPB1,S100A12,HSPH1,LTF,BCL7A,CSRP3,HAX1,TNIK,ASPH,EOMES,TRIM71,ALOX15B,ELANE,CEBPA,FGF9,TGFBR3,NSG1,MAML1,ORM2,CLEC4E,TNFSF13,CLEC5A,XCL1,EGF,TRIB2,KDM7A,LY9,DDX17,SKAP1,MMP9,NRG1,TCF4,EPHA4,BTN3A2,TLR2,CYP1B1,IRS2,THBS1,TIGIT,MAPK14,CD83,ITGB3,ZNF473,AZU1,ACTR6,CENPJ,RPS27L,CLU,GUF1,CR1,SLC24A3,INHBA,TBX21,C3AR1,MORF4L2,ABRA…
GO:BP	phosphorus metabolic process	GO:0006793	FALSE	2.777059584261023e-26	25.55641480197889	2410	6042	934	21026	GRB10,HK2,IRAK3,PFKFB2,TPST1,RORA,PLBD1,IGF1R,TTC36,S100A12,GADD45A,LTF,HAX1,TNIK,TNS2,ALOX15B,NME7,NDUFS4,PPP1R17,CDK5R1,ELANE,MAP3K15,FGF9,MAML1,MAP3K21,PPM1K,EGF,TRIB2,PRKACB,HINT1,SRPK1,MMP9,FUT8,NRG1,SIRPA,EPHA4,TLR2,IRS2,THBS1,DUSP5,MAPK14,ITGB3,MBOAT2,PPP1R26,AATK,PTPN4,TTC7B,PPP4R1,INHBA,AK3,IRGM,NUAK1,PFKFB4,SPHK1,MPP1,ABCD1,PDK4,G6PD,MTMR3,PTPRK,PLA2G7,FECH,DNAJC6,CMPK2,CTSG,TGDS,HK3,BM…
GO:BP	phosphate-containing compound metabolic process	GO:0006796	FALSE	2.7946794747196766e-26	25.553667994698092	2407	6042	933	21026	GRB10,HK2,IRAK3,PFKFB2,TPST1,RORA,PLBD1,IGF1R,TTC36,S100A12,GADD45A,LTF,HAX1,TNIK,TNS2,ALOX15B,NME7,NDUFS4,PPP1R17,CDK5R1,ELANE,MAP3K15,FGF9,MAML1,MAP3K21,PPM1K,EGF,TRIB2,PRKACB,HINT1,SRPK1,MMP9,FUT8,NRG1,SIRPA,EPHA4,TLR2,IRS2,THBS1,DUSP5,MAPK14,ITGB3,MBOAT2,PPP1R26,AATK,PTPN4,TTC7B,PPP4R1,INHBA,AK3,IRGM,NUAK1,PFKFB4,SPHK1,MPP1,ABCD1,PDK4,G6PD,MTMR3,PTPRK,PLA2G7,FECH,DNAJC6,CMPK2,CTSG,TGDS,HK3,BM…
GO:BP	cellular localization	GO:0051641	FALSE	8.076174017525472e-26	25.092794331873414	3661	6042	1335	21026	HK2,CACNB2,PFKFB2,STX17,PYHIN1,CD3G,KLHL20,KCNE1,ARL4C,CCT2,FZD5,FCER1A,XPO1,SYTL2,VEGFC,CSRP3,HAX1,TNIK,ASPH,ABCD2,MIS18A,CDK5R1,FGF9,SORT1,TRPM2,PLEKHA1,RAB13,ABAT,NSG1,WIPI1,RRAGD,CES1,XCL1,CYBRD1,REPS2,EGF,IFT56,SKAP1,RPF2,FAM3B,CTSD,SYP,NRG1,ZDHHC19,THOC1,TLR2,CYFIP1,LTBP1,SEC31B,IRS2,MAPK14,SDAD1,ITGB3,HSP90AB1,GP1BA,CENPJ,CLU,TTC7B,ABCA13,HIP1,IFI27,ABRAXAS1,HPSE,ATP7B,IRGM,SUCNR1,KIF21A,H…
GO:BP	cellular response to stress	GO:0033554	FALSE	6.4044367214805906e-24	23.193519061002846	1830	6042	731	21026	MTARC1,RORA,MGST1,IGF1R,GADD45A,BCL7A,RNF175,CEBPA,TRPM2,PLEKHA1,KREMEN1,WIPI1,RRAGD,MPO,MMP9,FUT8,SIRPA,KIAA0319,EPHA4,CYP1B1,THBS1,MAPK14,DSC2,HSP90AB1,GEN1,RPS27L,CLU,INHBA,MORF4L2,ABRAXAS1,NUAK1,SLC7A5,SPHK1,PLIN3,AQP1,ABCD1,PDK4,G6PD,AKR1C3,CEBPE,MTMR3,PTPRK,ADM,FECH,GRINA,SRXN1,MYC,TFEB,TOR1A,ACTR2,TRIP12,UBE2A,WAC,TAF12,HERPUD1,CDK7,NACC2,YY1,HYOU1,CBX3,PIK3C3,SLC34A1,TADA3,CRADD,CCM2,UFD1…
GO:BP	cell activation	GO:0001775	FALSE	1.2390889550502594e-23	22.906897514204488	1132	6042	490	21026	GPR18,MMP8,ITM2A,IKZF3,SH2D1A,CD3G,IL7R,RORA,FZD5,FCER1A,HLA-DPB1,ARG1,S100A12,BPI,HSPH1,EOMES,CEBPA,GP6,CD1C,CD8A,CLEC4E,TNFSF13,XCL1,LY9,MYL9,CAMP,PGLYRP1,RHOH,SIRPA,TLR2,FCRL3,IRS2,THBS1,TIGIT,MAPK14,CD83,SELP,PEAR1,ITGB3,AZU1,GP1BA,CLU,CD3D,CR1,INHBA,TBX21,SEMA4A,IRGM,SUCNR1,SLAMF7,SPHK1,GAB2,F2RL1,DPP4,CD177,MS4A1,CD8B,GP1BB,CTSG,TREML1,STAT4,DGKA,LAMP1,ELF4,YY1,TNFSF12,MYL12A,CD27,TP53,PSMB…
GO:BP	regulation of protein metabolic process	GO:0051246	FALSE	1.3847428125568937e-23	22.85863088036072	1855	6042	738	21026	IRAK3,ITM2A,TIMP2,PYHIN1,PTX3,XPO1,TTC36,CLEC3B,S100A12,GADD45A,LTF,HAX1,TNIK,ASPH,TRIM71,NDUFS4,CDK5R1,ELANE,CEBPA,FGF9,EGF,TRIB2,PRKACB,MMP9,NRG1,SIRPA,EPHA4,PIWIL4,CYFIP1,CYP1B1,THBS1,ITGB3,HSP90AB1,IL1R2,MRPL13,RPS27L,CLU,GUF1,CR1,INHBA,IRGM,SUCNR1,SPHK1,CEP78,RPS7,EIF5A2,SIAH2,G6PD,FECH,PSMF1,MYC,COPS7B,GSK3A,WAC,HERPUD1,CTDSP1,CALM2,EIF1,DR1,TNFSF12,TADA3,GTDC1,TP53,CD3E,RNF139,CUL3,RTN4,CS…
GO:BP	regulation of immune system process	GO:0002682	FALSE	1.7563595797989203e-23	22.755386566143077	1581	6042	645	21026	GPR18,MMP8,GPR171,IRAK3,IKZF3,KLRB1,SH2D1A,PYHIN1,CD3G,ZNF134,IL7R,RORA,FZD5,FCER1A,HLA-DPB1,ARG1,BPI,HSPH1,LTF,VEGFC,HAX1,C1RL,ELANE,CEBPA,GP6,PLEKHA1,CD1C,CD8A,ORM2,CLEC4E,TNFSF13,XCL1,SH2B2,CLEC12B,ITGA2B,SKAP1,PGLYRP1,RHOH,SIRPA,BTN3A2,TLR2,LAIR2,FCRL3,IRS2,THBS1,TIGIT,MAPK14,CD83,SELP,ITGB3,GP1BA,CLU,CD3D,CR1,INHBA,TBX21,C3AR1,IL1R1,IRGM,SERPING1,SLC7A5,SPHK1,H4C3,MPP1,GAB2,F2RL1,OSCAR,RNF13…
GO:BP	regulation of programmed cell death	GO:0043067	FALSE	7.315203119267044e-23	22.135773610433798	1506	6042	617	21026	IKZF3,CD3G,IL7R,KLHL20,CEACAM6,IGF1R,ARG1,GADD45A,LTF,HAX1,RNF144B,CDK5R1,CLEC5A,MPO,RPS3A,SERPINB2,MMP9,CTSD,NRG1,EPHA4,HTRA1,CYP1B1,IRS2,THBS1,ITGB3,AZU1,HSP90AB1,GZMA,CLU,INHBA,MORF4L2,HIP1,GBE1,SLC7A5,SPHK1,AQP1,RPS7,FOXQ1,F2RL1,SIAH2,NAIP,PDK4,G6PD,NDUFAF4,AKR1C3,ADM,CFDP1,CCR5,GRINA,MYC,BNIP2,HERPUD1,NACC2,TNFSF12,CDC42,HYOU1,CRADD,CD27,TP53,CD3E,RAD21,RTN4,PLSCR3,GNAI2,HDAC3,APC,PTRH2,TMBI…
GO:BP	intracellular signaling cassette	GO:0141124	FALSE	7.317922092472002e-23	22.135612218379013	1912	6042	754	21026	GPR18,GRB10,IRAK3,RORA,NDST1,SIPA1L2,IGF1R,S100A12,GADD45A,LTF,HAX1,TNIK,ASPH,ELANE,OTUD3,MAP3K15,CEBPA,FGF9,GPR174,TRPM2,PLEKHA1,TGFBR3,THEM4,MAP3K21,SH2B2,EGF,FGD4,MARCO,PROS1,HINT1,SHTN1,RHOH,NRG1,SIRPA,KIAA0319,S100B,CXCR6,EPHA4,TLR2,CYFIP1,FCRL3,IRS2,THBS1,DUSP5,MAPK14,SELP,PEAR1,ITGB3,INHBA,C3AR1,HIP1,HPSE,IRGM,SPHK1,RASGEF1B,RAB30,AQP1,GAB2,F2RL1,SIAH2,DOCK4,NAIP,SH3BP1,AKR1C3,SCAI,CEBPE,A…
GO:BP	leukocyte activation	GO:0045321	FALSE	9.830254601996072e-23	22.00743523386572	980	6042	433	21026	GPR18,MMP8,ITM2A,IKZF3,SH2D1A,CD3G,IL7R,RORA,FZD5,FCER1A,HLA-DPB1,ARG1,S100A12,BPI,HSPH1,EOMES,CEBPA,CD1C,CD8A,CLEC4E,TNFSF13,XCL1,LY9,CAMP,PGLYRP1,RHOH,SIRPA,TLR2,FCRL3,IRS2,THBS1,TIGIT,CD83,AZU1,CLU,CD3D,CR1,INHBA,TBX21,SEMA4A,IRGM,SUCNR1,SLAMF7,SPHK1,GAB2,F2RL1,DPP4,CD177,MS4A1,CD8B,CTSG,STAT4,LAMP1,ELF4,YY1,TNFSF12,CD27,TP53,PSMB10,CD3E,NFKBID,ARID1A,CASP3,SIT1,TCF7,INPP5D,VAV3,STXBP3,ITGB2,P…
GO:BP	developmental process	GO:0032502	FALSE	2.1176738128876687e-22	21.67414093382839	6553	6042	2203	21026	RETN,MAFG,GPR18,TDRD9,MMP8,HK2,APCDD1,GPR171,IRAK3,ITM2A,IKZF3,CD3G,IL7R,RORA,KCNE1,PTX3,NDST1,FZD5,IGF1R,TTC36,CLEC3B,VCAN,CRYGS,SPINK2,EVL,PTS,GADD45A,KCNA3,ZNF141,LTF,VEGFC,BCL7A,CSRP3,LHFPL2,HAX1,TNIK,ASPH,EOMES,ABCD2,TRIM71,TNS2,ALOX15B,FAM209B,NDUFS4,PPP1R17,CDK5R1,CEBPA,CLEC1B,FGF9,SORT1,PGM5,TRPM2,PLEKHA1,RAB13,TGFBR3,ABAT,KREMEN1,PRLH,GALNT11,IQCB1,MAML1,ZNF22,ATXN1L,CD8A,CLEC4E,TNFSF13,…
GO:BP	macromolecule catabolic process	GO:0009057	FALSE	3.3228452365026234e-22	21.478489885774593	1417	6042	584	21026	IRAK3,TIMP2,PYHIN1,KLHL20,XPO1,TTC36,CHIT1,RNF144B,RNF175,TRIM71,ELANE,CEBPA,WIPI1,EGF,TRIB2,CTSD,PGLYRP1,EPHA4,MAPK14,ANKRD9,HSP90AB1,GZMA,HECW2,CLU,TBX21,RNASE3,IFI27,HPSE,RPS7,SIAH2,PSMF1,TOR1A,PSMD4,TRIP12,GSK3A,UBE2A,WAC,PSMB4,HERPUD1,FASTKD5,TNFSF12,ANAPC11,UFD1L,PSMB10,RNF139,CUL3,FBXO44,CSDE1,APC,GAA,ROCK1,UBE2K,TNRC6A,YTHDF3,OVGP1,CASP3,UBE2D3,PSMC1,KCTD21,HNRNPC,ZC3H12D,FBXL5,SHARPIN,US…
GO:BP	autophagy	GO:0006914	FALSE	5.78948518370669e-22	21.23736005316649	597	6042	290	21026	STX17,FZD5,HAX1,CDK5R1,WIPI1,RRAGD,CTSD,ZDHHC19,CLU,INHBA,IRGM,SLC7A5,MTMR3,TFEB,GSK3A,UBE2A,WAC,RGS19,ATP6V1D,PIK3C3,TP53,KDM4A,GAA,TMBIM6,ROCK1,VTI1A,CASP3,MTMR14,USP33,SH3GLB1,ARHGAP26,GNAI3,TOLLIP,TSG101,UBQLN1,RAB2A,PHF23,CREG1,ATP6V0E1,NBR1,HGS,RHEB,WDR6,CHMP2A,TMEM208,ZMPSTE24,TAB2,SEC22B,TMEM59,SLC25A5,ACBD5,CHMP3,TRAF6,NRBP2,TSPO,ATP6V1C1,RAB7A,CHMP1B,ABI2,ATP6V0C,RAB1A,PIK3CA,TAX1BP1,RR…
GO:BP	process utilizing autophagic mechanism	GO:0061919	FALSE	5.78948518370669e-22	21.23736005316649	597	6042	290	21026	STX17,FZD5,HAX1,CDK5R1,WIPI1,RRAGD,CTSD,ZDHHC19,CLU,INHBA,IRGM,SLC7A5,MTMR3,TFEB,GSK3A,UBE2A,WAC,RGS19,ATP6V1D,PIK3C3,TP53,KDM4A,GAA,TMBIM6,ROCK1,VTI1A,CASP3,MTMR14,USP33,SH3GLB1,ARHGAP26,GNAI3,TOLLIP,TSG101,UBQLN1,RAB2A,PHF23,CREG1,ATP6V0E1,NBR1,HGS,RHEB,WDR6,CHMP2A,TMEM208,ZMPSTE24,TAB2,SEC22B,TMEM59,SLC25A5,ACBD5,CHMP3,TRAF6,NRBP2,TSPO,ATP6V1C1,RAB7A,CHMP1B,ABI2,ATP6V0C,RAB1A,PIK3CA,TAX1BP1,RR…
GO:BP	regulation of multicellular organismal process	GO:0051239	FALSE	3.815783135260748e-21	20.418416315790772	2956	6042	1086	21026	RETN,MAFG,GPR18,MMP8,GRB10,HK2,GPR171,IRAK3,CACNB2,IKZF3,ZNF134,IL7R,RORA,KCNE1,TSHZ3,FZD5,IGF1R,HLA-DPB1,VCAN,ARG1,LCN2,EVL,BPI,HSPH1,GADD45A,LTF,VEGFC,PRKAB2,BCL7A,CSRP3,HAX1,ASPH,ABCD2,ALOX15B,ELANE,CEBPA,FGF9,GP6,GPR174,TGFBR3,ABAT,ADORA3,KREMEN1,PRLH,ORM2,CLEC4E,TNFSF13,CLEC5A,XCL1,EGF,TRIB2,SERPINB2,LY9,MYL9,TNNT1,PROS1,MMP9,SHTN1,CAMP,PGLYRP1,RHOH,NRG1,SIRPA,KIAA0319,EPHA4,BTN3A2,TLR2,CYFI…
GO:BP	positive regulation of response to stimulus	GO:0048584	FALSE	4.4427894668793265e-21	20.352344266443787	2331	6042	884	21026	GPR18,MMP8,GRB10,IRAK3,SH2D1A,PYHIN1,CD3G,IL7R,NDST1,FZD5,IGF1R,HLA-DPB1,ARG1,S100A12,GADD45A,LTF,VEGFC,BCL7A,HAX1,TNIK,C1RL,ALOX15B,ELANE,CEBPA,FGF9,GPR174,PLEKHA1,TGFBR3,OCIAD2,CD1C,CD8A,CLEC4E,TNFSF13,RRAGD,XCL1,SH2B2,EGF,MARCO,PROS1,HINT1,MAOA,SKAP1,MMP9,CTSD,NRG1,KIAA0319,S100B,BTN3A2,TLR2,CYFIP1,CYP1B1,FCRL3,IRS2,THBS1,SELP,ITGB3,AZU1,HSP90AB1,ECHDC3,CENPJ,GEN1,CLU,CD3D,CR1,INHBA,TBX21,C3AR…
GO:BP	anatomical structure development	GO:0048856	FALSE	1.1399752077163915e-20	19.943104593636374	5997	6042	2024	21026	RETN,MAFG,GPR18,MMP8,HK2,APCDD1,GPR171,IRAK3,ITM2A,IKZF3,CD3G,IL7R,RORA,KCNE1,PTX3,NDST1,FZD5,IGF1R,TTC36,CLEC3B,VCAN,CRYGS,SPINK2,EVL,PTS,GADD45A,KCNA3,ZNF141,LTF,VEGFC,CSRP3,LHFPL2,HAX1,TNIK,ASPH,EOMES,ABCD2,TRIM71,TNS2,ALOX15B,NDUFS4,PPP1R17,CDK5R1,CEBPA,CLEC1B,FGF9,SORT1,PGM5,TRPM2,PLEKHA1,RAB13,TGFBR3,ABAT,KREMEN1,PRLH,GALNT11,IQCB1,MAML1,ZNF22,ATXN1L,CD8A,CLEC4E,TNFSF13,CLEC5A,CES1,CLIC4,SH…
GO:BP	regulation of apoptotic process	GO:0042981	FALSE	1.4010578661905852e-20	19.853543927206534	1462	6042	593	21026	IKZF3,CD3G,IL7R,KLHL20,CEACAM6,IGF1R,GADD45A,LTF,HAX1,RNF144B,CDK5R1,CLEC5A,MPO,RPS3A,SERPINB2,MMP9,CTSD,NRG1,EPHA4,HTRA1,CYP1B1,IRS2,THBS1,ITGB3,AZU1,HSP90AB1,GZMA,CLU,INHBA,MORF4L2,HIP1,GBE1,SLC7A5,SPHK1,AQP1,RPS7,FOXQ1,SIAH2,NAIP,PDK4,G6PD,NDUFAF4,AKR1C3,ADM,CFDP1,CCR5,GRINA,MYC,BNIP2,HERPUD1,NACC2,TNFSF12,CDC42,HYOU1,CRADD,CD27,TP53,CD3E,RAD21,RTN4,PLSCR3,GNAI2,HDAC3,APC,PTRH2,TMBIM6,ROCK1,CA…
GO:BP	regulation of metabolic process	GO:0019222	FALSE	1.5809971749891493e-20	19.801068906087853	7035	6042	2334	21026	MAFG,GPR18,TDRD9,MMP8,GRB10,HK2,IRAK3,ITM2A,IKZF3,TIMP2,PYHIN1,ZNF134,IL7R,RORA,PTX3,CCT2,KLF12,TSHZ3,FZD5,IGF1R,XPO1,TTC36,ATF7IP2,CLEC3B,HLA-DPB1,ARG1,S100A12,LCN2,PNPLA2,BPI,HSPH1,GADD45A,ZNF141,LTF,PRKAB2,BCL7A,CSRP3,HP,HAX1,TNIK,ASPH,EOMES,ABCD2,TRIM71,MIS18A,ALOX15B,NDUFS4,PPP1R17,CDK5R1,ELANE,CEBPA,FGF9,GPR174,SORT1,TGFBR3,ABAT,ADORA3,NSG1,WIPI1,ZNF527,MAML1,ZNF22,ATXN1L,ORM2,CLEC4E,TNFSF1…
GO:BP	positive regulation of biosynthetic process	GO:0009891	FALSE	1.893019958956757e-20	19.722844807050947	2696	6042	999	21026	MAFG,MMP8,IRAK3,IKZF3,PYHIN1,IL7R,RORA,PTX3,CCT2,KLF12,FZD5,IGF1R,CLEC3B,HLA-DPB1,HSPH1,CSRP3,HAX1,ASPH,EOMES,ABCD2,ALOX15B,ELANE,CEBPA,FGF9,TGFBR3,MAML1,ORM2,CLEC4E,TNFSF13,CLEC5A,XCL1,EGF,KDM7A,LY9,DDX17,SKAP1,TCF4,BTN3A2,TLR2,CYP1B1,IRS2,THBS1,TIGIT,MAPK14,CD83,ITGB3,ZNF473,AZU1,HSP90AB1,ACTR6,CENPJ,RPS27L,CLU,GUF1,SLC24A3,INHBA,TBX21,C3AR1,MORF4L2,IL1R1,HPSE,SLC7A5,SPHK1,CARF,RPS7,NHLH1,ABCD1…
GO:BP	positive regulation of immune system process	GO:0002684	FALSE	2.4366665813390598e-20	19.6132	1099	6042	467	21026	MMP8,IRAK3,SH2D1A,PYHIN1,CD3G,IL7R,FZD5,HLA-DPB1,ARG1,HSPH1,LTF,VEGFC,HAX1,C1RL,ELANE,CEBPA,PLEKHA1,CD1C,CD8A,CLEC4E,TNFSF13,XCL1,SH2B2,ITGA2B,SKAP1,RHOH,SIRPA,BTN3A2,TLR2,FCRL3,IRS2,THBS1,CD83,SELP,ITGB3,CLU,CD3D,CR1,TBX21,C3AR1,IL1R1,IRGM,SERPING1,SLC7A5,GAB2,F2RL1,RNF135,NAIP,DPP4,CD177,MS4A1,PLA2G7,KLRC4,CD8B,CTSG,CD101,BMX,LAMP1,ZDHHC3,PPP6C,TNFSF12,CD27,UFD1L,CD3E,CHUK,NFKBID,RTN4,ARID1A,UB…
GO:BP	macroautophagy	GO:0016236	FALSE	3.4029259557333767e-20	19.46814750061511	362	6042	194	21026	STX17,FZD5,CDK5R1,WIPI1,CTSD,ZDHHC19,IRGM,MTMR3,GSK3A,UBE2A,WAC,ATP6V1D,PIK3C3,TP53,GAA,VTI1A,CASP3,MTMR14,SH3GLB1,ARHGAP26,GNAI3,TSG101,UBQLN1,RAB2A,PHF23,ATP6V0E1,NBR1,HGS,RHEB,CHMP2A,SEC22B,SLC25A5,ACBD5,CHMP3,TRAF6,NRBP2,TSPO,ATP6V1C1,RAB7A,CHMP1B,ABI2,ATP6V0C,RAB1A,PIK3CA,SNX6,LRRK2,C9ORF72,ATG12,HMOX1,RAB2B,SNX18,VPS4B,UBXN2B,PIP4K2C,EHMT2,CHMP7,VPS41,VPS26A,RALB,LRSAM1,ATP6V1E1,TOM1,RAB5A,…
GO:BP	macromolecule localization	GO:0033036	FALSE	3.87747344869387e-20	19.41145116736999	3228	6042	1167	21026	RETN,HK2,CACNB2,PFKFB2,STX17,PYHIN1,CD3G,KLHL20,KCNE1,ARL4C,CCT2,FZD5,XPO1,PNPLA2,PLTP,SYTL2,VEGFC,CSRP3,HAX1,TNIK,ASPH,ABCD2,MIS18A,CDK5R1,FGF9,SORT1,PLEKHA1,RAB13,ABAT,NSG1,WIPI1,RRAGD,CES1,ABCC2,EGF,IFT56,SKAP1,RPF2,FAM3B,CTSD,ZDHHC19,THOC1,TLR2,LTBP1,SEC31B,IRS2,THBS1,MAPK14,SDAD1,ITGB3,HSP90AB1,CENPJ,CLU,ATP8B4,TTC7B,INHBA,ABCA13,ZNHIT3,HIP1,IFI27,HPSE,IRGM,SUCNR1,PLIN3,H4C3,CEP78,KPNA3,ABCD…
GO:BP	positive regulation of macromolecule biosynthetic process	GO:0010557	FALSE	4.2911230889958364e-20	19.367429027740698	2593	6042	964	21026	MAFG,MMP8,IRAK3,IKZF3,PYHIN1,IL7R,RORA,CCT2,KLF12,FZD5,CLEC3B,HLA-DPB1,HSPH1,CSRP3,HAX1,ASPH,EOMES,ALOX15B,ELANE,CEBPA,FGF9,TGFBR3,MAML1,ORM2,CLEC4E,TNFSF13,CLEC5A,XCL1,EGF,KDM7A,LY9,DDX17,SKAP1,TCF4,BTN3A2,TLR2,CYP1B1,IRS2,THBS1,TIGIT,MAPK14,CD83,ITGB3,ZNF473,AZU1,ACTR6,CENPJ,RPS27L,CLU,GUF1,SLC24A3,INHBA,TBX21,C3AR1,MORF4L2,IL1R1,HPSE,SLC7A5,SPHK1,CARF,RPS7,NHLH1,NR1D2,F2RL1,EIF5A2,RNF135,NAIP,…
GO:BP	signaling	GO:0023052	FALSE	1.0168270012236076e-19	18.992752929874662	6515	6042	2173	21026	RETN,GPR18,MMP8,GRB10,APCDD1,GPR171,IRAK3,CACNB2,PFKFB2,KLRB1,SH2D1A,OLFM4,CD3G,KLRG1,IL7R,RORA,NDST1,TSHZ3,FZD5,FCER1A,SIPA1L2,LTB4R,IGF1R,HLA-DPB1,ARG1,S100A12,EVL,DLGAP3,BPI,GADD45A,LTF,VEGFC,PRKAB2,CSRP3,HAX1,TNIK,ASPH,OLFML2A,TRIM71,TNS2,ALOX15B,PPP1R17,CDK5R1,ELANE,OTUD3,MAP3K15,CEBPA,CLEC1B,FGF9,GP6,GPR174,SORT1,MS4A7,TRPM2,PLEKHA1,RAB13,TGFBR3,ABAT,ADORA3,KREMEN1,OCIAD2,THEM4,PRLH,NSG1,GA…
GO:BP	negative regulation of biological process	GO:0048519	FALSE	1.1062178527227982e-19	18.9561593369386	5834	6042	1968	21026	RETN,MAFG,GPR18,TDRD9,GRB10,HK2,APCDD1,GPR171,IRAK3,ITM2A,TIMP2,SH2D1A,ZNF134,IL7R,RORA,KLHL20,KCNE1,PTX3,KLF12,CEACAM6,TSHZ3,FZD5,IGF1R,TTC36,ARG1,PNPLA2,EVL,BPI,GADD45A,ZNF141,LTF,VEGFC,BCL7A,HP,HAX1,RNF144B,ASPH,EOMES,ABCD2,TRIM71,MIS18A,TNS2,ALOX15B,CDK5R1,ELANE,OTUD3,CEBPA,FGF9,GPR174,SORT1,TRPM2,PLEKHA1,TGFBR3,ABAT,ADORA3,KREMEN1,THEM4,IQCB1,ATXN1L,CLEC5A,RRAGD,CES1,XCL1,MPO,CLIC4,ABCC2,RPS…
GO:BP	cellular macromolecule localization	GO:0070727	FALSE	2.1388757137074242e-19	18.669814450781097	2782	6042	1021	21026	HK2,CACNB2,PFKFB2,STX17,PYHIN1,CD3G,KLHL20,KCNE1,ARL4C,CCT2,FZD5,XPO1,SYTL2,VEGFC,CSRP3,HAX1,TNIK,ASPH,MIS18A,CDK5R1,FGF9,SORT1,PLEKHA1,RAB13,ABAT,NSG1,WIPI1,RRAGD,EGF,IFT56,SKAP1,RPF2,FAM3B,CTSD,ZDHHC19,TLR2,LTBP1,SEC31B,IRS2,MAPK14,SDAD1,ITGB3,HSP90AB1,CENPJ,CLU,TTC7B,HIP1,IFI27,HPSE,IRGM,SUCNR1,H4C3,CEP78,KPNA3,F2RL1,RAB36,CD177,PTPRK,TNFAIP6,CLTCL1,INSC,CD63,TOR1A,LAMP1,GSK3A,NDUFB1,CEP68,HER…
GO:BP	signal transduction	GO:0007165	FALSE	2.6579674949182154e-19	18.5754503344783	6002	6042	2016	21026	RETN,GPR18,MMP8,GRB10,APCDD1,GPR171,IRAK3,KLRB1,SH2D1A,OLFM4,CD3G,KLRG1,IL7R,RORA,NDST1,FZD5,FCER1A,SIPA1L2,LTB4R,IGF1R,HLA-DPB1,ARG1,S100A12,EVL,BPI,GADD45A,LTF,VEGFC,PRKAB2,CSRP3,HAX1,TNIK,ASPH,OLFML2A,TRIM71,TNS2,ALOX15B,PPP1R17,CDK5R1,ELANE,OTUD3,MAP3K15,CEBPA,CLEC1B,FGF9,GP6,GPR174,SORT1,MS4A7,TRPM2,PLEKHA1,RAB13,TGFBR3,ABAT,ADORA3,KREMEN1,OCIAD2,THEM4,PRLH,NSG1,GALNT11,MAML1,CD8A,MAP3K21,CL…
GO:BP	negative regulation of response to stimulus	GO:0048585	FALSE	2.7830706885823725e-19	18.55547576266654	1680	6042	661	21026	GPR18,GRB10,APCDD1,IRAK3,SH2D1A,IL7R,RORA,IGF1R,ARG1,LTF,TNS2,ELANE,OTUD3,FGF9,PLEKHA1,TGFBR3,KREMEN1,THEM4,XCL1,CLEC12B,SERPINB2,PRKACB,PROS1,MMP9,PGLYRP1,RHOH,NRG1,SIRPA,KIAA0319,EPHA4,HTRA1,PAK1IP1,LTBP1,FCRL3,THBS1,DUSP5,MAPK14,GP1BA,IL1R2,CLU,CR1,TBX21,IRGM,SERPING1,NR1D2,F2RL1,SIAH2,NAIP,DPP4,SH3BP1,SCAI,TNFAIP6,ADM,MCTP1,GRINA,MYC,GSK3A,PSMB4,ELF4,HERPUD1,RGS19,MARK3,PPP6C,YWHAB,HYOU1,SCYL…
GO:BP	regulation of cellular component organization	GO:0051128	FALSE	3.004931334190679e-19	18.522165447628897	2433	6042	908	21026	IRAK3,PTX3,CCT2,FZD5,IGF1R,XPO1,EVL,BCL7A,HAX1,TNIK,ASPH,NME7,CDK5R1,TRPM2,TGFBR3,KREMEN1,WIPI1,CLIC4,EGF,SKAP1,MMP9,SHTN1,SYP,RHOH,NRG1,SIRPA,KIAA0319,EPHA4,TLR2,CYFIP1,THBS1,MAPK14,SELP,ITGB3,AZU1,CENPJ,GEN1,HECW2,CLU,INHBA,ABCA13,HIP1,SEMA4A,IRGM,SPHK1,KIF21A,LRFN1,MPHOSPH9,F2RL1,EIF5A2,DOCK4,DPP4,G6PD,NTNG2,SH3BP1,CD177,MTMR3,MCTP1,CDCA8,DNAJC6,CD63,MYC,TOR1A,UBLCP1,ACTR2,GSK3A,NAIF1,ACTR3,RL…
GO:BP	protein localization	GO:0008104	FALSE	3.508703045589941e-19	18.454853386164455	2770	6042	1016	21026	HK2,CACNB2,PFKFB2,STX17,PYHIN1,CD3G,KLHL20,KCNE1,ARL4C,CCT2,FZD5,XPO1,SYTL2,VEGFC,CSRP3,HAX1,TNIK,ASPH,MIS18A,CDK5R1,FGF9,SORT1,PLEKHA1,RAB13,ABAT,NSG1,WIPI1,RRAGD,EGF,IFT56,SKAP1,RPF2,FAM3B,CTSD,ZDHHC19,TLR2,LTBP1,SEC31B,IRS2,MAPK14,SDAD1,ITGB3,HSP90AB1,CENPJ,CLU,TTC7B,HIP1,IFI27,HPSE,IRGM,SUCNR1,H4C3,CEP78,KPNA3,F2RL1,RAB36,CD177,PTPRK,TNFAIP6,CLTCL1,INSC,CD63,TOR1A,LAMP1,GSK3A,NDUFB1,CEP68,HER…
GO:BP	regulation of nucleobase-containing compound metabolic process	GO:0019219	FALSE	3.8495213756586454e-19	18.414593264473847	3990	6042	1400	21026	MAFG,IRAK3,IKZF3,PYHIN1,ZNF134,IL7R,RORA,CCT2,KLF12,TSHZ3,FZD5,IGF1R,ATF7IP2,S100A12,GADD45A,ZNF141,LTF,BCL7A,CSRP3,HAX1,ASPH,EOMES,TRIM71,CDK5R1,ELANE,CEBPA,FGF9,ADORA3,ZNF527,MAML1,ZNF22,ATXN1L,TNFSF13,XCL1,EGF,KDM7A,HINT1,SRPK1,DDX17,SKAP1,RHOH,NRG1,TCF4,ZNF566,TLR2,CYP1B1,ZNF347,MAPK14,SATB1,ZNF473,GZMA,ACTR6,CENPJ,TESMIN,FOXO3B,CLU,INHBA,TBX21,ZNF260,ZNHIT3,MORF4L2,ZNF532,ZNF571,IFI27,ABRAXA…
GO:BP	regulation of response to stress	GO:0080134	FALSE	5.728892000051519e-19	18.24192936490762	1387	6042	561	21026	MMP8,IRAK3,KLRB1,SH2D1A,PYHIN1,RORA,IGF1R,ARG1,S100A12,LTF,BCL7A,ELANE,CEBPA,KREMEN1,CLEC4E,XCL1,CLEC12B,SERPINB2,PROS1,MMP9,PGLYRP1,FUT8,SIRPA,KIAA0319,EPHA4,TLR2,FCRL3,THBS1,MAPK14,GP1BA,CLU,CR1,MORF4L2,ABRAXAS1,IL1R1,HPSE,IRGM,SERPING1,SUCNR1,SPHK1,ABCD1,NR1D2,F2RL1,RNF135,NAIP,PLA2G7,TNFAIP6,KLRC4,FECH,MCTP1,GRINA,MYC,LAMP1,ACTR2,PSMB4,TAF12,ELF4,HERPUD1,NACC2,ZDHHC3,PPP6C,YY1,HYOU1,TADA3,UFD…
GO:BP	negative regulation of cellular process	GO:0048523	FALSE	5.83538871877814e-19	18.233930208547935	5629	6042	1901	21026	MAFG,GPR18,TDRD9,GRB10,HK2,APCDD1,GPR171,IRAK3,ITM2A,TIMP2,SH2D1A,ZNF134,IL7R,RORA,KLHL20,KCNE1,PTX3,KLF12,CEACAM6,TSHZ3,FZD5,IGF1R,TTC36,ARG1,PNPLA2,EVL,BPI,GADD45A,ZNF141,LTF,VEGFC,BCL7A,HP,HAX1,RNF144B,ASPH,EOMES,ABCD2,TRIM71,MIS18A,TNS2,ALOX15B,CDK5R1,ELANE,OTUD3,CEBPA,FGF9,GPR174,SORT1,TRPM2,PLEKHA1,TGFBR3,ABAT,ADORA3,KREMEN1,THEM4,IQCB1,ATXN1L,CLEC5A,RRAGD,CES1,XCL1,MPO,CLIC4,ABCC2,RPS3A,CL…
GO:BP	lymphocyte activation	GO:0046649	FALSE	7.469645416466461e-19	18.126700013623285	814	6042	361	21026	GPR18,ITM2A,IKZF3,SH2D1A,CD3G,IL7R,RORA,FZD5,HLA-DPB1,ARG1,HSPH1,EOMES,CD1C,CD8A,CLEC4E,TNFSF13,XCL1,LY9,PGLYRP1,RHOH,SIRPA,FCRL3,IRS2,TIGIT,CD83,CD3D,CR1,INHBA,TBX21,SEMA4A,SLAMF7,F2RL1,DPP4,MS4A1,CD8B,CTSG,STAT4,LAMP1,ELF4,YY1,TNFSF12,CD27,TP53,PSMB10,CD3E,NFKBID,ARID1A,CASP3,SIT1,TCF7,INPP5D,VAV3,PTPRC,PREX1,ZMIZ1,SP3,TUSC2,CD300A,ATP7A,NFIL3,PLCG2,FNIP1,MEN1,SLC25A5,RBPJ,BLOC1S3,ITK,TRAF6,EXO…
GO:BP	protein catabolic process	GO:0030163	FALSE	1.0688644925879563e-18	17.97107734984414	1030	6042	437	21026	IRAK3,TIMP2,PYHIN1,KLHL20,XPO1,TTC36,RNF144B,RNF175,TRIM71,ELANE,CEBPA,EGF,TRIB2,CTSD,EPHA4,ANKRD9,HSP90AB1,GZMA,HECW2,CLU,TBX21,IFI27,HPSE,RPS7,SIAH2,PSMF1,TOR1A,PSMD4,TRIP12,GSK3A,UBE2A,WAC,PSMB4,HERPUD1,TNFSF12,ANAPC11,UFD1L,PSMB10,RNF139,CUL3,FBXO44,APC,ROCK1,UBE2K,CASP3,UBE2D3,PSMC1,KCTD21,FBXL5,SHARPIN,USP33,EDEM1,PSMD13,PSMA7,TRIM24,TOLLIP,TSG101,UBQLN1,PSMD7,TNFAIP1,PSMD6,ZER1,HGS,CCDC47,…
GO:BP	intracellular protein transport	GO:0006886	FALSE	1.143732314687249e-18	17.9416756082856	686	6042	314	21026	STX17,ARL4C,XPO1,SYTL2,ASPH,FGF9,SORT1,NSG1,MAPK14,CLU,IFI27,IRGM,KPNA3,CLTCL1,HERPUD1,COPB2,CDC42,PIK3C3,SEC13,UFD1L,TP53,TIMM8B,COPB1,HDAC3,KIF5B,TMEM30A,KPNB1,NAPG,VTI1A,SLU7,AP1G2,SNX13,EXOC6,STXBP3,EDEM1,TOMM20L,TSG101,RILPL2,HGS,COG7,PTPN23,RANBP3,NCOA4,PDCD10,CLIP3,ARF4,ATP6AP1,RAB18,FAM91A1,TXN,NFKBIA,SP100,HYAL2,MED1,RAB7A,SNX10,TIMM17B,NDEL1,ARF5,PDCD6,JAK2,TRIM28,RAB1A,SUMO1,XPO7,ARFIP…
GO:BP	cell communication	GO:0007154	FALSE	1.5048261688854138e-18	17.822513665022992	6540	6042	2172	21026	RETN,GPR18,MMP8,GRB10,APCDD1,GPR171,IRAK3,CACNB2,PFKFB2,KLRB1,SH2D1A,OLFM4,CD3G,KLRG1,IL7R,RORA,NDST1,TSHZ3,FZD5,FCER1A,SIPA1L2,LTB4R,IGF1R,HLA-DPB1,ARG1,S100A12,EVL,DLGAP3,BPI,GADD45A,LTF,VEGFC,PRKAB2,CSRP3,HAX1,TNIK,ASPH,OLFML2A,TRIM71,TNS2,ALOX15B,PPP1R17,CDK5R1,ELANE,OTUD3,MAP3K15,CEBPA,CLEC1B,FGF9,GP6,GPR174,SORT1,MS4A7,TRPM2,PLEKHA1,RAB13,TGFBR3,ABAT,ADORA3,KREMEN1,OCIAD2,THEM4,PRLH,NSG1,GA…
GO:BP	positive regulation of multicellular organismal process	GO:0051240	FALSE	8.725972965702373e-18	17.059186136852805	1667	6042	650	21026	RETN,MMP8,GRB10,HK2,IRAK3,CACNB2,IL7R,RORA,FZD5,IGF1R,HLA-DPB1,VCAN,LCN2,HSPH1,LTF,VEGFC,PRKAB2,BCL7A,HAX1,ALOX15B,ELANE,CEBPA,FGF9,TGFBR3,ABAT,ORM2,CLEC4E,TNFSF13,CLEC5A,XCL1,EGF,LY9,SHTN1,CAMP,RHOH,NRG1,SIRPA,EPHA4,BTN3A2,TLR2,CYFIP1,CYP1B1,FCRL3,TBXAS1,IRS2,THBS1,TIGIT,B4GALT5,MAPK14,CD83,SELP,PEAR1,ITGB3,AZU1,GP1BA,CLU,CR1,INHBA,TBX21,C3AR1,SEMA4A,IL1R1,HPSE,IRGM,SLC7A5,SPHK1,SOX6,AQP1,F2RL1,…
GO:BP	small molecule metabolic process	GO:0044281	FALSE	1.5351525413940442e-17	16.813848464099365	1776	6042	685	21026	MTARC1,HK2,PFKFB2,TPST1,RORA,PLOD2,DAO,TTC36,ARG1,PNPLA2,PTS,PLTP,PRKAB2,ABCD2,ALOX15B,NME7,NDUFS4,CEBPA,ABAT,THEM4,OLAH,PPM1K,CES1,MPO,CRAT,HSD3B7,HINT1,FUT8,ECHDC2,PTGR3,TLR2,CYP1B1,TBXAS1,IRS2,SLC23A1,MAPK14,ECHDC3,BDH2,INHBA,AK3,PFKFB4,SPHK1,MPP1,PTGS1,ABCD1,NAIP,NCEH1,PDK4,G6PD,TKTL1,AKR1C3,PLA2G7,ADM,FECH,CMPK2,TGDS,HK3,GSK3A,NDUFB1,LPGAT1,ISYNA1,SLC34A1,CYB5R3,PAFAH1B1,PDE7A,GMPR2,TP53,NDU…
GO:BP	translation	GO:0006412	FALSE	2.1614424876353032e-17	16.665256315825417	727	6042	325	21026	RPL9,ELAC1,TRIM71,RPLP0,RPS3A,EPHA4,PIWIL4,CYFIP1,CYP1B1,THBS1,MTRF1,MRPL13,RPS27L,GUF1,RPL36A,MRPS28,RPS7,EEF1B2,EIF5A2,FECH,MYC,EIF1,GTDC1,EIF3A,RNF139,MRPS18C,CSDE1,PPP1R15B,EIF4EBP2,TNRC6A,YTHDF3,SERP1,EIF4H,EIF1B,RBM8A,UPF1,RPL26L1,MKNK2,CARS2,LSM14B,MRPL33,ZFP36L1,MCTS1,NSUN5,EIF4E2,CNOT3,TCEA2,CHCHD1,FOXO3,DAPK3,TRIP4,DRG2,COPS5,DNAJC3,PELO,METTL17,FXR1,ATXN2,EIF4A3,CD28,DENR,MRPL38,EIF2D,…
GO:BP	establishment of protein localization	GO:0045184	FALSE	2.4562894666152837e-17	16.609720454165267	1937	6042	737	21026	HK2,PFKFB2,STX17,CD3G,KLHL20,KCNE1,ARL4C,FZD5,XPO1,SYTL2,VEGFC,HAX1,ASPH,CDK5R1,FGF9,SORT1,PLEKHA1,RAB13,ABAT,NSG1,IFT56,FAM3B,CTSD,ZDHHC19,TLR2,LTBP1,SEC31B,IRS2,MAPK14,SDAD1,CENPJ,CLU,HIP1,IFI27,HPSE,IRGM,SUCNR1,KPNA3,F2RL1,RAB36,CLTCL1,CD63,LAMP1,GSK3A,NDUFB1,HERPUD1,COPB2,ZDHHC3,YWHAB,CDC42,PIK3C3,SEC13,OLFM2,PAFAH1B1,UFD1L,TP53,TIMM8B,ARHGAP1,HOMER3,AAAS,COPB1,HDAC3,KIF5B,TMEM30A,KPNB1,NAPG,…
GO:BP	regulation of localization	GO:0032879	FALSE	4.06383502663066e-17	16.391063930763067	2029	6042	766	21026	RETN,GRB10,HK2,CACNB2,PFKFB2,PYHIN1,KCNE1,PTX3,CCT2,FZD5,XPO1,PNPLA2,PLTP,VEGFC,CSRP3,HAX1,ASPH,CDK5R1,TRPM2,ABAT,ADORA3,CES1,XCL1,EGF,MMP9,CTSD,NRG1,SIRPA,TLR2,CYFIP1,FCRL3,IRS2,THBS1,MAPK14,ITGB3,AZU1,HSP90AB1,GP1BA,CENPJ,CLU,INHBA,ABCA13,HIP1,IFI27,SLC7A5,SPHK1,PLIN3,AQP1,GAB2,F2RL1,G6PD,CD177,MS4A1,TNFAIP6,GP1BB,ABCB1,MCTP1,CLTCL1,CCR5,CDCA8,DNAJC6,CD63,RYR1,TOR1A,LAMP1,GSK3A,CALM2,MARK3,ZDHH…
GO:BP	proteolysis involved in protein catabolic process	GO:0051603	FALSE	5.0806043913790066e-17	16.294084620742147	786	6042	345	21026	PYHIN1,KLHL20,XPO1,TTC36,RNF144B,RNF175,TRIM71,CEBPA,EGF,TRIB2,EPHA4,ANKRD9,HSP90AB1,GZMA,HECW2,CLU,TBX21,IFI27,RPS7,SIAH2,PSMF1,TOR1A,PSMD4,TRIP12,GSK3A,UBE2A,WAC,PSMB4,HERPUD1,ANAPC11,UFD1L,PSMB10,RNF139,CUL3,FBXO44,APC,UBE2K,UBE2D3,PSMC1,KCTD21,FBXL5,SHARPIN,USP33,EDEM1,PSMD13,PSMA7,TOLLIP,TSG101,UBQLN1,PSMD7,TNFAIP1,PSMD6,ZER1,HGS,CCDC47,PTPN23,RNF13,RSPRY1,CHMP2A,ZMPSTE24,USP38,CLPX,UBE2R2,M…
GO:BP	cell surface receptor signaling pathway	GO:0007166	FALSE	6.392147407614243e-17	16.194353218428844	2819	6042	1019	21026	MMP8,GRB10,APCDD1,GPR171,IRAK3,KLRB1,SH2D1A,CD3G,KLRG1,IL7R,RORA,NDST1,FZD5,FCER1A,IGF1R,HLA-DPB1,ARG1,EVL,BPI,GADD45A,LTF,VEGFC,CSRP3,HAX1,TNIK,TRIM71,TNS2,CDK5R1,CEBPA,CLEC1B,FGF9,GP6,SORT1,MS4A7,PLEKHA1,TGFBR3,ABAT,ADORA3,KREMEN1,OCIAD2,GALNT11,MAML1,CD8A,CLEC4E,XCL1,SH2B2,CLEC12B,ITGA2B,REPS2,EGF,PRKACB,MARCO,IFT56,SKAP1,MMP9,SHTN1,CTSD,FUT8,NRG1,KIAA0319,CXCR6,EPHA4,HTRA1,BTN3A2,TLR2,CYFIP1,…
GO:BP	DNA-templated transcription	GO:0006351	FALSE	8.430035864620436e-17	16.07417057771528	3549	6042	1248	21026	MAFG,IRAK3,IKZF3,PYHIN1,ZNF134,RORA,KLF12,TSHZ3,FZD5,ATF7IP2,S100A12,GADD45A,ZNF141,LTF,BCL7A,CSRP3,HAX1,ASPH,EOMES,CDK5R1,ELANE,CEBPA,FGF9,ADORA3,ZNF527,MAML1,ZNF22,ATXN1L,XCL1,EGF,KDM7A,HINT1,DDX17,SKAP1,RHOH,NRG1,TCF4,ZNF566,TLR2,CYP1B1,ZNF347,MAPK14,SATB1,ZNF473,ACTR6,CENPJ,TESMIN,FOXO3B,CLU,INHBA,TBX21,ZNF260,ZNHIT3,MORF4L2,ZNF532,ZNF571,IFI27,SPHK1,ZNF14,SOX6,CARF,NHLH1,FOXQ1,NR1D2,F2RL1,SI…
GO:BP	generation of precursor metabolites and energy	GO:0006091	FALSE	1.0903486974204558e-16	15.962434590914542	478	6042	231	21026	GRB10,HK2,PFKFB2,NDUFS4,CEBPA,PRLH,WIPI1,IRS2,NDUFA4,GBE1,ABCD1,G6PD,FECH,HK3,GSK3A,NDUFB1,COX6A1,TP53,NDUFA1,PLEC,UQCR11,NDUFB4,SURF1,NDUFA2,COX7A2,GAA,NDUFB3,COX7B,UQCR10,UQCRQ,PPP1R3E,PGM2,COX5A,UQCRFS1,PGAM4,NDUFB6,ATP7A,UGP2,IFNAR1,RBPJ,PGLS,UCP2,NDUFAF1,PPP1R3D,ND5,FBP1,COX8A,PIK3CA,ATP6,ATP5J,PFKFB1,BID,ATG12,HDAC4,MYBBP1A,PGD,TKT,SDHB,DERA,COX5B,STK40,ENO3,BPGM,SLC25A25,NR1D1,COX3,SDHD,CO…
GO:BP	regulation of catabolic process	GO:0009894	FALSE	1.1512176964377464e-16	15.9388425430758	1040	6042	433	21026	IRAK3,TIMP2,PYHIN1,FZD5,XPO1,TTC36,PNPLA2,HP,HAX1,ABCD2,TRIM71,CDK5R1,CEBPA,WIPI1,RRAGD,EGF,TRIB2,ZDHHC19,IRS2,MAPK14,HSP90AB1,CLU,IRGM,SLC7A5,RPS7,ABCD1,MTMR3,PSMF1,TFEB,GSK3A,UBE2A,WAC,HERPUD1,FASTKD5,TNFSF12,ATP6V1D,PIK3C3,TP53,RNF139,CUL3,CSDE1,KDM4A,APC,ROCK1,UBE2K,TNRC6A,YTHDF3,CASP3,PSMC1,HNRNPC,ZC3H12D,FBXL5,USP33,YTHDC1,SH3GLB1,GNAI3,UBQLN1,PHF23,ATP6V0E1,ZER1,HGS,RHEB,RBM8A,WDR6,DIS3L2,…
GO:BP	regulation of RNA metabolic process	GO:0051252	FALSE	1.2083653940920367e-16	15.917801720811926	3687	6042	1290	21026	MAFG,IRAK3,IKZF3,PYHIN1,ZNF134,RORA,KLF12,TSHZ3,FZD5,ATF7IP2,S100A12,GADD45A,ZNF141,LTF,BCL7A,CSRP3,HAX1,ASPH,EOMES,TRIM71,CDK5R1,ELANE,CEBPA,FGF9,ADORA3,ZNF527,MAML1,ZNF22,ATXN1L,XCL1,EGF,KDM7A,HINT1,SRPK1,DDX17,SKAP1,RHOH,NRG1,TCF4,ZNF566,TLR2,CYP1B1,ZNF347,MAPK14,SATB1,ZNF473,ACTR6,CENPJ,TESMIN,FOXO3B,CLU,INHBA,TBX21,ZNF260,ZNHIT3,MORF4L2,ZNF532,ZNF571,IFI27,SPHK1,ZNF14,SOX6,CARF,NHLH1,FOXQ1,N…
GO:BP	cell development	GO:0048468	FALSE	1.4581141542449755e-16	15.836208474222447	2876	6042	1035	21026	GPR18,GPR171,ITM2A,IKZF3,CD3G,IL7R,RORA,KCNE1,PTX3,FZD5,IGF1R,TTC36,VCAN,SPINK2,LTF,VEGFC,CSRP3,HAX1,TNIK,EOMES,CDK5R1,CEBPA,CLEC1B,PGM5,TRPM2,RAB13,TGFBR3,KREMEN1,MAML1,ATXN1L,CD8A,CLEC4E,CLEC5A,CLIC4,LY9,IFT56,MYL9,TNNT1,SRPK1,MMP9,SHTN1,SLC22A14,PGLYRP1,RHOH,NRG1,ALAS2,KIAA0319,S100B,EPHA4,TLR2,CYFIP1,FCRL3,B4GALT5,MAPK14,CD83,C12ORF57,GP1BA,HECW2,CLU,CD3D,CR1,INHBA,TBX21,S1PR3,SEMA4A,HPSE,SLC…
GO:BP	hemopoiesis	GO:0030097	FALSE	1.8632883384960279e-16	15.729719934084846	976	6042	410	21026	GPR18,GPR171,ITM2A,IKZF3,CD3G,IL7R,RORA,FZD5,LTF,HAX1,EOMES,CEBPA,CLEC1B,TRPM2,TGFBR3,ATXN1L,CD8A,CLEC4E,CLEC5A,LY9,MMP9,PGLYRP1,RHOH,ALAS2,TLR2,FCRL3,MAPK14,CD83,GP1BA,CD3D,CR1,INHBA,TBX21,SEMA4A,H4C3,GAB2,F2RL1,OSCAR,G6PD,MS4A1,CEBPE,TNFAIP6,GFI1B,FECH,GP1BB,SLC25A40,MYC,CD101,STAT4,KLF13,YY1,CDC42,FLI1,CD27,PAFAH1B1,TP53,CD3E,NFKBID,ARID1A,KLF3,CRIP2,CASP3,EPAS1,TCF7,INPP5D,KCNQ1,PTPRC,SGPL1,M…
GO:BP	modification-dependent protein catabolic process	GO:0019941	FALSE	3.3629152637137094e-16	15.47328407558313	638	6042	289	21026	PYHIN1,KLHL20,XPO1,TTC36,RNF144B,TRIM71,CEBPA,EGF,TRIB2,ANKRD9,HSP90AB1,HECW2,CLU,TBX21,IFI27,RPS7,SIAH2,PSMF1,PSMD4,TRIP12,GSK3A,UBE2A,WAC,PSMB4,HERPUD1,ANAPC11,UFD1L,PSMB10,RNF139,CUL3,FBXO44,APC,UBE2K,UBE2D3,PSMC1,KCTD21,FBXL5,SHARPIN,USP33,EDEM1,PSMD13,PSMA7,TOLLIP,TSG101,UBQLN1,PSMD7,TNFAIP1,PSMD6,ZER1,HGS,PTPN23,RNF13,CHMP2A,ZMPSTE24,USP38,UBE2R2,CHMP3,UBE2W,CHMP1B,RNF130,FBXL22,MYLIP,TRIM2…
GO:BP	modification-dependent macromolecule catabolic process	GO:0043632	FALSE	6.203667961068494e-16	15.207351454980731	643	6042	290	21026	PYHIN1,KLHL20,XPO1,TTC36,RNF144B,TRIM71,CEBPA,EGF,TRIB2,ANKRD9,HSP90AB1,HECW2,CLU,TBX21,IFI27,RPS7,SIAH2,PSMF1,PSMD4,TRIP12,GSK3A,UBE2A,WAC,PSMB4,HERPUD1,ANAPC11,UFD1L,PSMB10,RNF139,CUL3,FBXO44,APC,UBE2K,UBE2D3,PSMC1,KCTD21,FBXL5,SHARPIN,USP33,EDEM1,PSMD13,PSMA7,TOLLIP,TSG101,UBQLN1,PSMD7,TNFAIP1,PSMD6,ZER1,HGS,PTPN23,RNF13,DIS3L2,CHMP2A,ZMPSTE24,USP38,UBE2R2,CHMP3,UBE2W,CHMP1B,RNF130,FBXL22,MYLI…
GO:BP	negative regulation of signal transduction	GO:0009968	FALSE	8.931497694139877e-16	15.049075709559117	1326	6042	527	21026	GRB10,APCDD1,IRAK3,SH2D1A,RORA,IGF1R,ARG1,LTF,TNS2,OTUD3,FGF9,PLEKHA1,TGFBR3,KREMEN1,THEM4,CLEC12B,PRKACB,MMP9,RHOH,NRG1,SIRPA,EPHA4,HTRA1,PAK1IP1,LTBP1,FCRL3,THBS1,DUSP5,MAPK14,IL1R2,CLU,IRGM,F2RL1,SIAH2,NAIP,SH3BP1,SCAI,TNFAIP6,ADM,GRINA,MYC,GSK3A,HERPUD1,RGS19,MARK3,PPP6C,YWHAB,HYOU1,SCYL2,SEC13,PAFAH1B1,UFD1L,TP53,CD3E,EIF3A,CUL3,HOMER3,SZT2,GNAI2,PTPN12,PPP1R15B,HDAC3,APC,TMBIM6,TAOK3,YTHDF3…
GO:BP	ubiquitin-dependent protein catabolic process	GO:0006511	FALSE	9.300658749942235e-16	15.031486290012415	628	6042	284	21026	PYHIN1,KLHL20,XPO1,TTC36,RNF144B,TRIM71,CEBPA,EGF,TRIB2,ANKRD9,HSP90AB1,HECW2,CLU,TBX21,IFI27,RPS7,SIAH2,PSMF1,PSMD4,TRIP12,GSK3A,UBE2A,WAC,PSMB4,HERPUD1,ANAPC11,UFD1L,PSMB10,RNF139,CUL3,FBXO44,APC,UBE2K,UBE2D3,PSMC1,KCTD21,FBXL5,SHARPIN,USP33,EDEM1,PSMD13,PSMA7,TOLLIP,TSG101,UBQLN1,PSMD7,TNFAIP1,PSMD6,ZER1,HGS,PTPN23,RNF13,CHMP2A,USP38,UBE2R2,CHMP3,UBE2W,CHMP1B,RNF130,FBXL22,MYLIP,TRIM28,SUMO1,R…
GO:BP	regulation of immune response	GO:0050776	FALSE	1.1332017449400435e-15	14.945692765410646	947	6042	397	21026	IRAK3,KLRB1,SH2D1A,PYHIN1,CD3G,IL7R,FZD5,FCER1A,HLA-DPB1,ARG1,LTF,C1RL,ELANE,GP6,PLEKHA1,CD1C,CD8A,CLEC4E,TNFSF13,XCL1,SH2B2,CLEC12B,SKAP1,PGLYRP1,BTN3A2,TLR2,LAIR2,FCRL3,MAPK14,CLU,CD3D,CR1,TBX21,C3AR1,IL1R1,IRGM,SERPING1,F2RL1,OSCAR,RNF135,NAIP,CD177,MS4A1,KLRC4,CD8B,VSTM1,CTSG,BMX,LAMP1,PSMB4,ZDHHC3,PPP6C,TNFSF12,UFD1L,CD3E,CHUK,NFKBID,RTN4,UBE2K,YTHDF3,INPP5D,VAV3,ITGB2,PTPRC,MFHAS1,UBQLN1,UB…
GO:BP	defense response	GO:0006952	FALSE	1.2841020183208002e-15	14.891400471412231	1853	6042	701	21026	MMP8,IRAK3,KLRB1,SH2D1A,PYHIN1,KLRG1,IL7R,RORA,PTX3,NDST1,DAO,FCER1A,LTB4R,ARG1,S100A12,LCN2,BPI,LTF,CSRP3,HP,CRISP3,ABCD2,TRGV9,C1RL,RNASE1,DEFA4,ELANE,CEBPA,TRGV5,CLEC1B,ADORA3,ORM2,CLEC4E,CLEC5A,XCL1,CD163,MPO,CLEC12B,LY9,MARCO,SRPK1,DDX17,MMP9,CAMP,PGLYRP1,SIRPA,CXCR6,TLR2,FCRL3,OLR1,THBS1,MAPK14,CD83,SELP,AZU1,GZMA,IL1R2,SLPI,CLU,CR1,INHBA,S1PR3,C3AR1,RNASE3,IFI27,IL1R1,IRGM,TRDV2,SERPING1,S…
GO:BP	leukocyte differentiation	GO:0002521	FALSE	1.8250459390940235e-15	14.738726199238226	636	6042	286	21026	GPR18,ITM2A,IKZF3,CD3G,IL7R,RORA,FZD5,LTF,HAX1,EOMES,CEBPA,TRPM2,CD8A,CLEC4E,LY9,MMP9,PGLYRP1,RHOH,TLR2,FCRL3,MAPK14,CD83,CD3D,CR1,INHBA,TBX21,SEMA4A,GAB2,F2RL1,OSCAR,MS4A1,CEBPE,TNFAIP6,MYC,CD101,STAT4,YY1,CDC42,CD27,PAFAH1B1,TP53,CD3E,NFKBID,ARID1A,TCF7,INPP5D,PTPRC,PREX1,ZMIZ1,SP3,TUSC2,OSTM1,ATP7A,NFIL3,PLCG2,FNIP1,ATP6AP1,RB1,MEN1,VEGFA,SLC25A5,RBPJ,ITK,UCP2,TRAF6,NFAM1,ZFP36L1,MED1,ADAM8,SN…
GO:BP	mitochondrial ATP synthesis coupled electron transport	GO:0042775	FALSE	2.1080857836181597e-15	14.676111720502194	99	6042	71	21026	NDUFS4,NDUFA4,NDUFB1,COX6A1,NDUFA1,UQCR11,NDUFB4,NDUFA2,COX7A2,NDUFB3,COX7B,UQCR10,UQCRQ,COX5A,UQCRFS1,NDUFB6,NDUFAF1,ND5,COX8A,BID,SDHB,COX5B,COX3,SDHD,COX6B1,COX2,ND4,NDUFB5,NDUFA8,TAZ,NDUFS6,NDUFC1,COX7A2L,ISCU,SDHC,NDUFS2,GHITM,PINK1,COX1,UQCRB,NDUFC2,NDUFB10,ND2,CYTB,NDUFV2,NDUFB7,NDUFA9,SDHA,NDUFS7,NDUFA12,ND4L,NDUFS5,COX4I1,NDUFB2,COX7C,NDUFS3,CHCHD2,UQCRC1,CYC1,NDUFS8,UQCRH,UQCC3,PARK7,ND…
GO:BP	ATP synthesis coupled electron transport	GO:0042773	TRUE	2.1080857836181597e-15	14.676111720502194	99	6042	71	21026	NDUFS4,NDUFA4,NDUFB1,COX6A1,NDUFA1,UQCR11,NDUFB4,NDUFA2,COX7A2,NDUFB3,COX7B,UQCR10,UQCRQ,COX5A,UQCRFS1,NDUFB6,NDUFAF1,ND5,COX8A,BID,SDHB,COX5B,COX3,SDHD,COX6B1,COX2,ND4,NDUFB5,NDUFA8,TAZ,NDUFS6,NDUFC1,COX7A2L,ISCU,SDHC,NDUFS2,GHITM,PINK1,COX1,UQCRB,NDUFC2,NDUFB10,ND2,CYTB,NDUFV2,NDUFB7,NDUFA9,SDHA,NDUFS7,NDUFA12,ND4L,NDUFS5,COX4I1,NDUFB2,COX7C,NDUFS3,CHCHD2,UQCRC1,CYC1,NDUFS8,UQCRH,UQCC3,PARK7,ND…
GO:BP	regulation of RNA biosynthetic process	GO:2001141	FALSE	2.356555479882498e-15	14.62772233128173	3428	6042	1201	21026	MAFG,IRAK3,IKZF3,PYHIN1,ZNF134,RORA,KLF12,TSHZ3,FZD5,ATF7IP2,S100A12,GADD45A,ZNF141,LTF,BCL7A,CSRP3,HAX1,ASPH,EOMES,CDK5R1,ELANE,CEBPA,FGF9,ADORA3,ZNF527,MAML1,ZNF22,ATXN1L,XCL1,EGF,KDM7A,HINT1,DDX17,SKAP1,RHOH,NRG1,TCF4,ZNF566,TLR2,CYP1B1,ZNF347,MAPK14,SATB1,ZNF473,ACTR6,CENPJ,TESMIN,FOXO3B,CLU,INHBA,TBX21,ZNF260,ZNHIT3,MORF4L2,ZNF532,ZNF571,IFI27,SPHK1,ZNF14,SOX6,CARF,NHLH1,FOXQ1,NR1D2,F2RL1,SI…
GO:BP	immune response	GO:0006955	FALSE	2.6286960348887255e-15	14.580259629946369	2070	6042	770	21026	TRAV16,IRAK3,TRAV5,ITM2A,KLRB1,SH2D1A,PYHIN1,CD3G,KLRG1,IL7R,CEACAM8,RORA,PTX3,ERAP2,FZD5,FCER1A,LTB4R,IGF1R,CHIT1,HLA-DPB1,ARG1,TRGC2,S100A12,LCN2,BPI,LTF,CRISP3,EOMES,TRGV9,C1RL,DEFA4,ELANE,TRGV5,GP6,PLEKHA1,TGFBR3,TRAV12-2,CD1C,CD8A,CLEC4E,TNFSF13,CLEC5A,XCL1,SH2B2,CLEC12B,LY9,MARCO,TRAV12-3,SRPK1,SKAP1,CAMP,PGLYRP1,SIRPA,CXCR6,BTN3A2,TLR2,LAIR2,FCRL3,THBS1,MAPK14,CD83,AZU1,GZMA,IL1R2,TRAV13-2…
GO:BP	energy derivation by oxidation of organic compounds	GO:0015980	FALSE	3.449160893738274e-15	14.462286546533468	345	6042	176	21026	GRB10,NDUFS4,PRLH,WIPI1,IRS2,NDUFA4,GBE1,ABCD1,GSK3A,NDUFB1,COX6A1,TP53,NDUFA1,PLEC,UQCR11,NDUFB4,SURF1,NDUFA2,COX7A2,GAA,NDUFB3,COX7B,UQCR10,UQCRQ,PPP1R3E,PGM2,COX5A,UQCRFS1,NDUFB6,ATP7A,UGP2,IFNAR1,NDUFAF1,PPP1R3D,ND5,COX8A,PIK3CA,ATP6,ATP5J,BID,ATG12,MYBBP1A,SDHB,COX5B,STK40,SLC25A25,NR1D1,COX3,SDHD,COX6B1,COX2,INPP5K,DNAJC30,LEPR,EPM2AIP1,IREB2,CBFA2T3,RB1CC1,ND4,IDH3A,NDUFB5,PUM2,PPP1R3B,NDU…
GO:BP	regulation of DNA-templated transcription	GO:0006355	FALSE	3.4504582790087686e-15	14.462123219469637	3409	6042	1194	21026	MAFG,IRAK3,IKZF3,PYHIN1,ZNF134,RORA,KLF12,TSHZ3,FZD5,ATF7IP2,S100A12,GADD45A,ZNF141,LTF,BCL7A,CSRP3,HAX1,ASPH,EOMES,CDK5R1,ELANE,CEBPA,FGF9,ADORA3,ZNF527,MAML1,ZNF22,ATXN1L,XCL1,EGF,KDM7A,HINT1,DDX17,SKAP1,RHOH,NRG1,TCF4,ZNF566,TLR2,CYP1B1,ZNF347,MAPK14,SATB1,ZNF473,ACTR6,CENPJ,TESMIN,FOXO3B,CLU,INHBA,TBX21,ZNF260,ZNHIT3,MORF4L2,ZNF532,ZNF571,IFI27,SPHK1,ZNF14,SOX6,CARF,NHLH1,FOXQ1,NR1D2,F2RL1,SI…
GO:BP	negative regulation of cell communication	GO:0010648	FALSE	3.9666053709105774e-15	14.40158100440637	1436	6042	561	21026	GRB10,APCDD1,IRAK3,SH2D1A,RORA,IGF1R,ARG1,LTF,TNS2,OTUD3,FGF9,PLEKHA1,TGFBR3,KREMEN1,THEM4,CLEC12B,PRKACB,MMP9,RHOH,NRG1,SIRPA,EPHA4,HTRA1,PAK1IP1,LTBP1,FCRL3,THBS1,DUSP5,MAPK14,IL1R2,CLU,INHBA,IRGM,F2RL1,SIAH2,NAIP,SH3BP1,SCAI,TNFAIP6,ADM,GRINA,MYC,GSK3A,HERPUD1,RGS19,MARK3,PPP6C,YWHAB,HYOU1,SCYL2,SEC13,PAFAH1B1,UFD1L,TP53,CD3E,EIF3A,CUL3,HOMER3,SZT2,GNAI2,PTPN12,PPP1R15B,HDAC3,APC,TMBIM6,TAOK3,…
GO:BP	negative regulation of signaling	GO:0023057	FALSE	5.554176251288779e-15	14.255380342852304	1435	6042	560	21026	GRB10,APCDD1,IRAK3,SH2D1A,RORA,IGF1R,ARG1,LTF,TNS2,OTUD3,FGF9,PLEKHA1,TGFBR3,KREMEN1,THEM4,CLEC12B,PRKACB,MMP9,RHOH,NRG1,SIRPA,EPHA4,HTRA1,PAK1IP1,LTBP1,FCRL3,THBS1,DUSP5,MAPK14,IL1R2,CLU,INHBA,IRGM,F2RL1,SIAH2,NAIP,SH3BP1,SCAI,TNFAIP6,ADM,GRINA,MYC,GSK3A,HERPUD1,RGS19,MARK3,PPP6C,YWHAB,HYOU1,SCYL2,SEC13,PAFAH1B1,UFD1L,TP53,CD3E,EIF3A,CUL3,HOMER3,SZT2,GNAI2,PTPN12,PPP1R15B,HDAC3,APC,TMBIM6,TAOK3,…
GO:BP	regulation of biological quality	GO:0065008	FALSE	1.634880470384566e-14	13.786513994043466	2947	6042	1045	21026	RETN,HK2,CACNB2,PFKFB2,PYHIN1,IL7R,KCNE1,CCT2,ERAP2,TSHZ3,IGF1R,PNPLA2,EVL,KCNA3,VEGFC,CSRP3,HAX1,ASPH,TRIM71,CDK5R1,OTUD3,GP6,PLEKHA1,ABAT,THEM4,NSG1,AGTRAP,PPM1K,CLIC4,FGD4,SERPINB2,PRKACB,MYL9,PROS1,FAM3B,SHTN1,SYP,RHOH,NRG1,KIAA0319,S100B,CXCR6,EPHA4,TLR2,CYFIP1,CYP1B1,TBXAS1,IRS2,THBS1,B4GALT5,MAPK14,SELP,DSC2,PEAR1,ITGB3,AZU1,HSP90AB1,GP1BA,CLU,F13A1,ATP8B4,INHBA,S1PR3,C3AR1,ASGR2,HIP1,SEMA…
GO:BP	response to external stimulus	GO:0009605	FALSE	1.9799188573928127e-14	13.70335260797516	2415	6042	876	21026	RETN,GPR18,MMP8,IRAK3,TRAV5,IKZF3,KLRB1,SH2D1A,PYHIN1,KLRG1,IL7R,RORA,FKBP5,PTX3,DAO,FZD5,IGF1R,CHIT1,ARG1,S100A12,LCN2,BPI,GADD45A,LTF,VEGFC,CSRP3,HP,CRISP3,ABCD2,TRGV9,C1RL,RNASE1,DEFA4,ELANE,CEBPA,TRGV5,TRPM2,RAB13,KREMEN1,OCIAD2,CLEC4E,CLEC5A,XCL1,MPO,CLEC12B,SERPINB2,LY9,MARCO,HSD3B7,PROS1,SRPK1,DDX17,MMP9,CAMP,PGLYRP1,NRG1,SIRPA,KIAA0319,CXCR6,EPHA4,TLR2,FCRL3,THBS1,MAPK14,SELP,ITGB3,AZU1,G…
GO:BP	proteolysis	GO:0006508	FALSE	2.401193422259403e-14	13.619572855004801	1486	6042	574	21026	GZMK,MMP8,TIMP2,PYHIN1,HPR,KLHL20,ERAP2,XPO1,TTC36,CLEC3B,LTF,HP,RNF144B,ASPH,RNF175,TRIM71,C1RL,ELANE,OTUD3,CEBPA,EGF,TRIB2,PRKACB,HINT1,MMP9,CTSD,EPHA4,HTRA1,OLR1,THBS1,ANKRD9,AZU1,HSP90AB1,GZMA,IL1R2,HECW2,CLU,CR1,TBX21,IFI27,RPS7,SIAH2,ASPRV1,DPP4,PLA2G7,PSMF1,CTSG,RNPEPL1,TOR1A,PSMD4,TRIP12,GSK3A,PCSK7,UBE2A,WAC,PSMB4,HERPUD1,ANAPC11,UFD1L,TP53,PSMB10,MMP24,RNF139,CUL3,FBXO44,APC,ROCK1,UBE2K…
GO:BP	regulation of cytokine production	GO:0001817	FALSE	2.5368807736193914e-14	13.59569994293827	781	6042	334	21026	GPR18,MMP8,IRAK3,ZNF134,RORA,FZD5,HLA-DPB1,ARG1,BPI,LTF,ABCD2,ALOX15B,ELANE,GPR174,ORM2,CLEC4E,CLEC5A,XCL1,TRIB2,LY9,PGLYRP1,SIRPA,BTN3A2,TLR2,CYP1B1,THBS1,TIGIT,MAPK14,CD83,AZU1,IL1R2,CLU,CR1,INHBA,TBX21,S1PR3,C3AR1,IL1R1,HPSE,IRGM,SLC7A5,SPHK1,ABCD1,F2RL1,RNF135,NAIP,ELF4,YY1,UFD1L,CD3E,RAD21,CHUK,AGPAT2,CUL3,HOMER3,RTN4,CASP3,INPP5D,PTPRC,UBASH3A,KLF2,TUSC2,CD58,BTN2A1,MAPK11,ZNF580,PLCG2,ITK,…
GO:BP	multicellular organismal process	GO:0032501	FALSE	3.3489685672056793e-14	13.475088928648006	7322	6042	2370	21026	RETN,MAFG,GPR18,MMP8,GRB10,HK2,APCDD1,GPR171,IRAK3,CACNB2,ITM2A,IKZF3,SH2D1A,CD3G,ZNF134,IL7R,RORA,KCNE1,PTX3,ERAP2,NDST1,DAO,TSHZ3,FZD5,FCER1A,LTB4R,IGF1R,TTC36,CHIT1,CLEC3B,HLA-DPB1,VCAN,ARG1,CRYGS,S100A12,LCN2,EVL,PTS,BPI,HSPH1,GADD45A,KCNA3,ZNF141,PLTP,LTF,VEGFC,PRKAB2,BCL7A,CSRP3,LHFPL2,HAX1,TNIK,ASPH,EOMES,ABCD2,TRIM71,TNS2,ALOX15B,NDUFS4,PPP1R17,CDK5R1,ELANE,CEBPA,FGF9,GP6,GPR174,SORT1,TRP…
GO:BP	cellular developmental process	GO:0048869	FALSE	4.106303607226199e-14	13.386548943404684	4438	6042	1504	21026	RETN,MAFG,GPR18,TDRD9,MMP8,APCDD1,GPR171,ITM2A,IKZF3,CD3G,IL7R,RORA,KCNE1,PTX3,FZD5,IGF1R,TTC36,VCAN,SPINK2,LTF,VEGFC,BCL7A,CSRP3,HAX1,TNIK,EOMES,ALOX15B,FAM209B,CDK5R1,CEBPA,CLEC1B,FGF9,SORT1,PGM5,TRPM2,PLEKHA1,RAB13,TGFBR3,KREMEN1,PRLH,IQCB1,MAML1,ATXN1L,CD8A,CLEC4E,CLEC5A,CES1,CLIC4,SH2B2,RPS3A,TRIB2,LY9,IFT56,MYL9,TNNT1,SRPK1,DDX17,MMP9,SHTN1,SLC22A14,PGLYRP1,RHOH,NRG1,ALAS2,TCF4,KIAA0319,S10…
GO:BP	cell differentiation	GO:0030154	FALSE	5.098074904206315e-14	13.292593787885092	4437	6042	1503	21026	RETN,MAFG,GPR18,TDRD9,MMP8,APCDD1,GPR171,ITM2A,IKZF3,CD3G,IL7R,RORA,KCNE1,PTX3,FZD5,IGF1R,TTC36,VCAN,SPINK2,LTF,VEGFC,BCL7A,CSRP3,HAX1,TNIK,EOMES,ALOX15B,FAM209B,CDK5R1,CEBPA,CLEC1B,FGF9,SORT1,PGM5,TRPM2,PLEKHA1,RAB13,TGFBR3,KREMEN1,PRLH,IQCB1,MAML1,ATXN1L,CD8A,CLEC4E,CLEC5A,CES1,CLIC4,SH2B2,RPS3A,TRIB2,LY9,IFT56,MYL9,TNNT1,SRPK1,DDX17,MMP9,SHTN1,SLC22A14,PGLYRP1,RHOH,NRG1,ALAS2,TCF4,KIAA0319,S10…
GO:BP	cytokine production	GO:0001816	FALSE	5.1958518055710665e-14	13.284343244231142	787	6042	335	21026	GPR18,MMP8,IRAK3,ZNF134,RORA,FZD5,HLA-DPB1,ARG1,BPI,LTF,ABCD2,ALOX15B,ELANE,GPR174,ORM2,CLEC4E,CLEC5A,XCL1,TRIB2,LY9,PGLYRP1,SIRPA,BTN3A2,TLR2,CYP1B1,THBS1,TIGIT,MAPK14,CD83,AZU1,IL1R2,CLU,CR1,INHBA,TBX21,S1PR3,C3AR1,IL1R1,HPSE,IRGM,SLC7A5,SPHK1,ABCD1,F2RL1,RNF135,NAIP,ELF4,YY1,UFD1L,CD3E,RAD21,CHUK,AGPAT2,CUL3,HOMER3,RTN4,CASP3,PCSK5,INPP5D,PTPRC,UBASH3A,KLF2,TUSC2,CD58,BTN2A1,MAPK11,ZNF580,PLCG…
GO:BP	phosphorylation	GO:0016310	FALSE	5.711589613173107e-14	13.243243004862348	1320	6042	517	21026	GRB10,HK2,IRAK3,PFKFB2,IGF1R,TTC36,S100A12,GADD45A,LTF,HAX1,TNIK,NDUFS4,CDK5R1,ELANE,MAP3K15,FGF9,MAML1,MAP3K21,EGF,TRIB2,PRKACB,SRPK1,MMP9,NRG1,SIRPA,EPHA4,TLR2,IRS2,THBS1,MAPK14,ITGB3,AATK,PPP4R1,INHBA,IRGM,NUAK1,PFKFB4,SPHK1,FECH,CTSG,HK3,BMX,DGKA,GSK3A,CTDSP1,CALM2,MARK3,CDK7,SCYL2,TADA3,TP53,ANKK1,CD3E,MINK1,CHUK,SERTAD1,PPP1R15B,HDAC3,APC,MAP3K3,ROCK1,UBE2K,TAOK3,PRKAR1B,PDGFB,ITGB2,PTPRC,T…
GO:BP	oxidative phosphorylation	GO:0006119	FALSE	6.511234462797746e-14	13.18633666587781	146	6042	91	21026	NDUFS4,NDUFA4,ABCD1,NDUFB1,COX6A1,NDUFA1,UQCR11,NDUFB4,NDUFA2,COX7A2,NDUFB3,COX7B,UQCR10,UQCRQ,COX5A,UQCRFS1,NDUFB6,ATP7A,NDUFAF1,ND5,COX8A,ATP6,ATP5J,BID,SDHB,COX5B,COX3,SDHD,COX6B1,COX2,DNAJC30,ND4,NDUFB5,NDUFA8,AK4,TAZ,NDUFS6,NDUFC1,COX7A2L,ISCU,SDHC,NDUFS2,GHITM,SLC25A23,PINK1,NDUFB11,COX1,UQCRB,VCP,NDUFC2,SHMT2,NDUFB10,ND2,CYTB,NDUFV2,NDUFB7,MLXIPL,NDUFA9,SDHA,NDUFS7,NDUFA12,COX6B2,ND4L,NDUF…
GO:BP	apoptotic signaling pathway	GO:0097190	FALSE	7.715040748741816e-14	13.112661775769727	606	6042	270	21026	SORT1,HINT1,MMP9,NRG1,CYP1B1,THBS1,RPS27L,CLU,INHBA,HIP1,IFI27,RPS7,SIAH2,GRINA,MYC,GSK3A,HERPUD1,NACC2,ZDHHC3,TNFSF12,HYOU1,CRADD,CD27,TP53,CD3E,CUL3,PLSCR3,GNAI2,TMBIM6,CASP3,SGMS1,PTPRC,SGPL1,UBQLN1,TGFBR1,BCL2L12,CDKN2D,KRT18,IFI27L2,STYXL1,PDCD10,MAP3K5,MKNK2,RB1,SLC25A5,MAZ,SP100,HYAL2,HMGB2,PDCD6,JAK2,TRAF7,MAP2K4,FOXO3,RET,DAPK3,LRRK2,Q16594,FADD,STX4,BID,HIPK1,RIPK1,HMOX1,PTTG1IP,CASP4,M…
GO:BP	aerobic electron transport chain	GO:0019646	FALSE	8.642151519581398e-14	13.063378123636772	91	6042	65	21026	NDUFS4,NDUFA4,NDUFB1,COX6A1,NDUFA1,UQCR11,NDUFB4,NDUFA2,COX7A2,NDUFB3,COX7B,UQCR10,UQCRQ,COX5A,UQCRFS1,NDUFB6,NDUFAF1,ND5,COX8A,SDHB,COX5B,COX3,SDHD,COX6B1,COX2,ND4,NDUFB5,NDUFA8,NDUFS6,NDUFC1,COX7A2L,ISCU,SDHC,NDUFS2,PINK1,COX1,UQCRB,NDUFC2,NDUFB10,ND2,CYTB,NDUFV2,NDUFB7,NDUFA9,SDHA,NDUFS7,ND4L,NDUFS5,COX4I1,NDUFB2,COX7C,NDUFS3,UQCRC1,CYC1,NDUFS8,UQCRH,UQCC3,PARK7,NDUFV1,COX6C,NDUFB9,NDUFAB1,MT-…
GO:BP	carbohydrate derivative metabolic process	GO:1901135	FALSE	9.570600734324115e-14	13.019060801260373	983	6042	402	21026	HK2,ITM2A,PFKFB2,TPST1,RORA,PTX3,NDST1,CHIT1,NME7,NDUFS4,CHST13,GALNT11,ST3GAL6,EGF,HINT1,PGLYRP1,FUT8,B4GALT5,ASGR2,AK3,HPSE,PFKFB4,MPP1,G6PD,AKR1C3,TNFAIP6,CMPK2,TGDS,HK3,B3GALT4,GSK3A,NDUFB1,SLC34A1,PDE7A,GMPR2,TP53,NDUFA1,NDUFB4,RNF139,FBXO44,PIGS,NDUFA2,NDUFB3,OVGP1,SERP1,PDGFB,EDEM1,GLA,PGM2,GALNT7,GNAI3,CAD,FPGT,PGAM4,NDUFB6,COG7,RHOQ,NANS,NUDT3,CLPX,UGP2,TMEM59,IMPDH1,PGLS,SULF2,NPR2,ARFG…
GO:BP	regulation of organelle organization	GO:0033043	FALSE	1.0579072181307049e-13	12.975552419655076	1148	6042	458	21026	CCT2,EVL,BCL7A,HAX1,NME7,CDK5R1,TRPM2,WIPI1,CLIC4,EGF,MMP9,RHOH,CYFIP1,ITGB3,CENPJ,GEN1,HECW2,CLU,IRGM,SPHK1,KIF21A,LRFN1,MPHOSPH9,F2RL1,SH3BP1,MTMR3,CDCA8,MYC,GSK3A,ARPC2,YY1,ARPC3,CDC42,SPTAN1,BRK1,PAFAH1B1,ANAPC11,DIAPH1,TP53,MAPRE1,CAPZA1,RAD21,CUL3,ARID1A,PLSCR3,APC,ROCK1,RAE1,PXN,HNRNPC,SH3GLB1,NEB,PDGFB,TSG101,TGFBR1,TERF2,PHF23,MECP2,PREX1,ARPC5,RHOQ,CHMP2A,STYXL1,SSH1,UPF1,PDCD10,DDHD2,C…
GO:BP	positive regulation of nucleobase-containing compound metabolic process	GO:0045935	FALSE	1.2191730956413412e-13	12.913934629783533	2036	6042	750	21026	MAFG,IKZF3,PYHIN1,RORA,CCT2,KLF12,FZD5,IGF1R,BCL7A,CSRP3,HAX1,ASPH,EOMES,TRIM71,CEBPA,MAML1,TNFSF13,EGF,KDM7A,DDX17,SKAP1,TCF4,TLR2,CYP1B1,MAPK14,ZNF473,ACTR6,CENPJ,INHBA,TBX21,MORF4L2,ABRAXAS1,CARF,NHLH1,NR1D2,F2RL1,ZNF319,CEBPE,GFI1B,MED21,MYC,STAT4,PLAGL1,TFEB,ACTR2,GSK3A,WAC,TAF12,ELF4,KLF13,ACTR3,RLF,SRCAP,CTBP2,EIF1,CDK7,MBD2,YY1,TNFSF12,CDC42,FLI1,TADA3,VEZF1,TP53,MTA3,CHUK,ZNF507,LMO7,CSD…
GO:BP	proteasomal protein catabolic process	GO:0010498	FALSE	1.77695067291331e-13	12.750324627782145	543	6042	246	21026	KLHL20,XPO1,TTC36,RNF175,TRIM71,CEBPA,TRIB2,ANKRD9,HSP90AB1,CLU,TBX21,IFI27,SIAH2,PSMF1,TOR1A,PSMD4,TRIP12,GSK3A,UBE2A,WAC,PSMB4,HERPUD1,ANAPC11,UFD1L,PSMB10,RNF139,CUL3,FBXO44,APC,UBE2K,UBE2D3,PSMC1,FBXL5,SHARPIN,EDEM1,PSMD13,PSMA7,UBQLN1,PSMD7,TNFAIP1,PSMD6,ZER1,CCDC47,USP38,MIDN,UGGT1,UBE2W,TMX1,JKAMP,FBXL22,TRIM28,SUMO1,RAD23B,HECTD3,FEM1C,PSMB3,PSMD12,PSMA6,PSMB9,LRRK2,PSMB1,DDI2,Q16594,SPOP…
GO:BP	respiratory electron transport chain	GO:0022904	FALSE	2.2149562876122174e-13	12.654634840202144	115	6042	76	21026	NDUFS4,NDUFA4,NDUFB1,COX6A1,NDUFA1,PLEC,UQCR11,NDUFB4,NDUFA2,COX7A2,NDUFB3,COX7B,UQCR10,UQCRQ,COX5A,UQCRFS1,NDUFB6,NDUFAF1,ND5,COX8A,BID,MYBBP1A,SDHB,COX5B,COX3,SDHD,COX6B1,COX2,ND4,NDUFB5,PUM2,NDUFA8,TAZ,NDUFS6,NDUFC1,COX7A2L,ISCU,SDHC,NDUFS2,GHITM,PINK1,COX1,UQCRB,NDUFC2,NDUFB10,ND2,CYTB,NDUFV2,NDUFB7,NDUFA9,SDHA,NDUFS7,GBA,AIFM2,NDUFA12,ND4L,NDUFS5,COX4I1,NDUFB2,COX7C,NDUFS3,CHCHD2,UQCRC1,CYC1…
GO:BP	multicellular organism development	GO:0007275	FALSE	3.495871447612194e-13	12.456444545894371	4727	6042	1585	21026	RETN,MAFG,MMP8,HK2,APCDD1,GPR171,IRAK3,IKZF3,IL7R,RORA,KCNE1,PTX3,NDST1,FZD5,IGF1R,TTC36,VCAN,CRYGS,EVL,PTS,GADD45A,KCNA3,ZNF141,LTF,VEGFC,CSRP3,LHFPL2,HAX1,TNIK,ASPH,EOMES,ABCD2,TRIM71,TNS2,ALOX15B,NDUFS4,PPP1R17,CDK5R1,CEBPA,FGF9,PLEKHA1,RAB13,TGFBR3,ABAT,KREMEN1,PRLH,GALNT11,MAML1,ATXN1L,TNFSF13,CLIC4,SH2B2,ITGA2B,EGF,KDM7A,PRKACB,MMP9,SHTN1,CAMP,PGLYRP1,RHOH,FUT8,NRG1,TCF4,KIAA0319,S100B,EPHA…
GO:BP	cytoplasmic translation	GO:0002181	FALSE	4.2660471581687926e-13	12.369974348038188	165	6042	98	21026	RPL9,RPLP0,RPS3A,RPL36A,RPS7,EIF3A,CSDE1,RPL26L1,MCTS1,DRG2,DENR,EIF2D,RBM4,PIWIL2,RPL10,DHX9,RPL28,RPL13A,FMR1,EIF3H,ETF1,CNBP,EIF3L,CPEB4,RPL13,RPL3,RPL27A,Q6P4E4,IGF2BP1,EIF2B5,HNRNPU,RPL23,RPL34,UNK,YTHDF2,RPL26,RPL31,EIF2AK4,HNRNPD,MIF4GD,NCBP2,EIF4A2,DHX29,RPL7,RPL22L1,EIF3G,RPLP1,RPL41,FAU,RPS14,RPL35,RPL30,RPS27,RPL12,RPS20,RPL11,RPL29,RPS28,RPS29,RPSA,EIF3I,RPS3,ZNF385A,RPS5,RPS2,RPL18A,…
GO:BP	biological process involved in interspecies interaction between organisms	GO:0044419	FALSE	5.013861075275146e-13	12.299827703699954	1759	6042	657	21026	MMP8,IRAK3,TRAV5,IKZF3,KLRB1,SH2D1A,PYHIN1,KLRG1,IL7R,FKBP5,PTX3,DAO,FZD5,CHIT1,ARG1,S100A12,LCN2,BPI,LTF,HP,CRISP3,ABCD2,TRGV9,C1RL,RNASE1,DEFA4,ELANE,TRGV5,OCIAD2,CLEC4E,CLEC5A,XCL1,MPO,CLEC12B,LY9,MARCO,SRPK1,DDX17,MMP9,CAMP,PGLYRP1,SIRPA,TLR2,FCRL3,MAPK14,SELP,ITGB3,AZU1,HSP90AB1,GZMA,NMT2,TRAV13-2,SLPI,CLU,CR1,TBX21,TRAV13-1,RNASE3,IFI27,IRGM,TRDV2,SERPING1,SLC7A5,SLAMF7,AQP1,PADI4,KPNA3,F2R…
GO:BP	endocytosis	GO:0006897	FALSE	5.10322378034946e-13	12.2921553870979	709	6042	304	21026	PTX3,ELANE,SORT1,OCIAD2,REPS2,EGF,MARCO,SYP,RHOH,NRG1,SIRPA,TLR2,THBS1,PEAR1,ITGB3,AZU1,CLU,ABCA13,ASGR2,HIP1,SPHK1,F2RL1,DPP4,SH3BP1,CD177,CEBPE,ADM,MCTP1,CLTCL1,DNAJC6,CD63,TOR1A,CALM2,ARPC3,CDC42,PIK3C3,SCYL2,ROCK1,EPN1,USP33,VAV3,ITGB2,PTPRC,TSG101,VAC14,PICALM,CREG1,TUSC2,HGS,CD300A,RHOQ,PLCG2,CLIP3,MKLN1,VEGFA,ARHGAP27,LMBRD1,FGR,RAB7A,SNX10,CD302,RAB1A,LYST,FCHO1,NCF2,PIK3CA,C4BPA,LYN,LDLR…
GO:BP	regulation of transport	GO:0051049	FALSE	5.989605451689427e-13	12.222601784588585	1607	6042	607	21026	RETN,GRB10,HK2,CACNB2,PFKFB2,KCNE1,PTX3,XPO1,PLTP,VEGFC,ASPH,CDK5R1,ABAT,ADORA3,CES1,XCL1,EGF,MMP9,NRG1,SIRPA,TLR2,CYFIP1,FCRL3,IRS2,THBS1,MAPK14,ITGB3,AZU1,CLU,INHBA,ABCA13,HIP1,IFI27,SLC7A5,SPHK1,AQP1,GAB2,F2RL1,G6PD,CD177,MS4A1,ABCB1,MCTP1,CLTCL1,DNAJC6,CD63,TOR1A,LAMP1,GSK3A,CALM2,ARPC3,CDC42,SLC34A1,DIAPH1,MINK1,RNF139,ARHGAP1,HOMER3,AAAS,GNAI2,HDAC3,KIF5B,TMEM30A,TMBIM6,ROCK1,CASP3,GSTM2,SE…
GO:BP	cellular response to chemical stimulus	GO:0070887	FALSE	9.453459766380397e-13	12.024409219801637	2192	6042	795	21026	GPR18,MMP8,MTARC1,GRB10,IRAK3,RORA,KCNE1,MGST1,IGF1R,SLC28A3,S100A12,BPI,LTF,VEGFC,CSRP3,HP,ASPH,TNS2,DEFA4,CDK5R1,CEBPA,TRPM2,PLEKHA1,RAB13,NSG1,AGTRAP,RRAGD,CES1,XCL1,MPO,CLIC4,ABCC2,SH2B2,HSD3B7,DDX17,MMP9,CTSD,CAMP,FUT8,SIRPA,CXCR6,EPHA4,TLR2,CYFIP1,CYP1B1,IRS2,THBS1,MAPK14,ITGB3,AZU1,ECHDC3,INHBA,C3AR1,IRGM,SLC7A5,SPHK1,MPP1,PTGS1,AQP1,CARF,ABCD1,NR1D2,F2RL1,DOCK4,NCEH1,PDK4,DPP4,G6PD,PF4V1,…
GO:BP	membrane organization	GO:0061024	FALSE	1.0773780016833605e-12	11.967631896290586	821	6042	342	21026	HK2,STX17,PLTP,CSRP3,ABCD2,THEM4,PPM1K,MARCO,SYP,RHOH,FOLR3,SEC31B,THBS1,CLU,ATP8B4,CR1,SPHK1,ABCD1,F2RL1,DPP4,SH3BP1,MTMR3,ABCB1,TOR1A,GSK3A,NAIF1,PPP6C,CDC42,SEC13,PAFAH1B1,TP53,PLEC,TIMM8B,CUL3,RTN4,PLSCR3,SH3GLB2,HDAC3,TMEM30A,NAPG,TMEM11,BROX,COX4NB,VTI1A,SERP1,VCPIP1,SH3GLB1,VAV3,EXOC6,ITGB2,TOR1AIP2,REEP5,PTPRC,TSG101,RILPL2,PICALM,TOR1AIP1,HGS,CCDC47,CD300A,CHMP2A,PLCG2,SSH1,DEGS1,ZMPSTE2…
GO:BP	regulation of cellular component biogenesis	GO:0044087	FALSE	1.2425839702051258e-12	11.905674253246938	1011	6042	407	21026	FZD5,EVL,HAX1,NME7,CDK5R1,TRPM2,TGFBR3,WIPI1,SKAP1,SYP,NRG1,TLR2,CYFIP1,THBS1,SELP,CENPJ,CLU,SEMA4A,IRGM,SPHK1,KIF21A,LRFN1,MPHOSPH9,F2RL1,DOCK4,NTNG2,MTMR3,DNAJC6,UBLCP1,ACTR2,ACTR3,ARPC2,ARPC3,CDC42,SPTAN1,ORMDL2,BRK1,TP53,MAPRE1,CAPZA1,RTN4,APC,MPP7,ROCK1,PXN,LCAT,SH3GLB1,TSG101,SETD5,TGFBR1,TERF2,PHF23,MECP2,PREX1,ARPC5,HGS,RHOQ,CHMP2A,ATP7A,STYXL1,PLCG2,SSH1,CLIP3,FNIP1,FSCN1,RAP1B,ARF4,RB1,…
GO:BP	positive regulation of RNA metabolic process	GO:0051254	FALSE	1.5578795415778572e-12	11.807466125899984	1835	6042	679	21026	MAFG,IKZF3,PYHIN1,RORA,KLF12,FZD5,CSRP3,HAX1,ASPH,EOMES,TRIM71,CEBPA,MAML1,EGF,KDM7A,DDX17,SKAP1,TCF4,TLR2,MAPK14,ZNF473,ACTR6,CENPJ,INHBA,TBX21,MORF4L2,CARF,NHLH1,NR1D2,F2RL1,ZNF319,CEBPE,GFI1B,MED21,MYC,STAT4,PLAGL1,TFEB,ACTR2,GSK3A,WAC,TAF12,ELF4,KLF13,ACTR3,RLF,SRCAP,CTBP2,EIF1,CDK7,MBD2,YY1,FLI1,TADA3,VEZF1,TP53,MTA3,CHUK,ZNF507,LMO7,CSDE1,ARID1A,PRDX6,SERTAD1,HDAC3,IER2,GPBP1,ROCK1,TNRC6A,M…
GO:BP	response to oxygen-containing compound	GO:1901700	FALSE	1.6286252346143622e-12	11.78817884034702	1669	6042	625	21026	RETN,MMP8,GRB10,IRAK3,PFKFB2,RORA,FKBP5,KCNE1,MGST1,IGF1R,BPI,LTF,CSRP3,HP,ASPH,TNS2,NDUFS4,DEFA4,CDK5R1,ELANE,SORT1,TRPM2,PLEKHA1,RAB13,TGFBR3,ABAT,PRLH,NSG1,AGTRAP,RRAGD,CES1,MPO,SH2B2,MMP9,CTSD,CAMP,SIRPA,EPHA4,TLR2,CYFIP1,CYP1B1,TBXAS1,IRS2,THBS1,MAPK14,SELP,ITGB3,ECHDC3,SLPI,INHBA,F5,IRGM,SLC7A5,SPHK1,AQP1,PDK4,G6PD,PF4V1,AKR1C3,CEBPE,PTPRK,ADM,FECH,CCR5,CMPK2,CTSG,STAT4,GNB1,GSK3A,RGS19,MBD…
GO:BP	transcription by RNA polymerase II	GO:0006366	FALSE	1.6599649537394361e-12	11.779901080970935	2711	6042	958	21026	MAFG,IKZF3,ZNF134,RORA,KLF12,TSHZ3,FZD5,GADD45A,ZNF141,BCL7A,CSRP3,HAX1,EOMES,ELANE,CEBPA,FGF9,ZNF527,MAML1,ATXN1L,KDM7A,DDX17,SKAP1,TCF4,ZNF566,TLR2,ZNF347,MAPK14,SATB1,ZNF473,FOXO3B,INHBA,TBX21,ZNF260,ZNF571,IFI27,ZNF14,SOX6,CARF,NHLH1,FOXQ1,NR1D2,F2RL1,ZNF319,ZNF195,CEBPE,ZFP30,GFI1B,MED21,JDP2,DMRTC2,MYC,STAT4,PLAGL1,TFEB,NACC1,ACTR2,FOXN2,GSK3A,TAF12,ELF4,KLF13,CTDSP1,ACTR3,RLF,SRCAP,CTBP2,C…
GO:BP	regulation of macromolecule metabolic process	GO:0060255	FALSE	2.4578227109160134e-12	11.609449447099589	6492	6042	2108	21026	MAFG,GPR18,TDRD9,MMP8,GRB10,IRAK3,ITM2A,IKZF3,TIMP2,PYHIN1,ZNF134,IL7R,RORA,PTX3,CCT2,KLF12,TSHZ3,FZD5,IGF1R,XPO1,TTC36,ATF7IP2,CLEC3B,HLA-DPB1,ARG1,S100A12,BPI,HSPH1,GADD45A,ZNF141,LTF,BCL7A,CSRP3,HAX1,TNIK,ASPH,EOMES,ABCD2,TRIM71,MIS18A,ALOX15B,NDUFS4,CDK5R1,ELANE,CEBPA,FGF9,GPR174,SORT1,TGFBR3,ADORA3,NSG1,ZNF527,MAML1,ZNF22,ATXN1L,ORM2,CLEC4E,TNFSF13,CLEC5A,XCL1,ABCC2,EGF,TRIB2,KDM7A,PRKACB,LY…
GO:BP	aerobic respiration	GO:0009060	FALSE	2.4676029621236003e-12	11.60772471709836	199	6042	111	21026	NDUFS4,NDUFA4,ABCD1,NDUFB1,COX6A1,NDUFA1,UQCR11,NDUFB4,SURF1,NDUFA2,COX7A2,NDUFB3,COX7B,UQCR10,UQCRQ,COX5A,UQCRFS1,NDUFB6,ATP7A,NDUFAF1,ND5,COX8A,ATP6,ATP5J,BID,SDHB,COX5B,COX3,SDHD,COX6B1,COX2,DNAJC30,IREB2,CBFA2T3,ND4,IDH3A,NDUFB5,NDUFA8,AK4,TAZ,NDUFS6,NDUFC1,COX7A2L,ISCU,SDHC,NDUFS2,GHITM,PANK2,SLC25A23,PINK1,NDUFB11,COX1,UQCRB,VCP,NDUFC2,IDH1,SHMT2,COL6A1,ARL2,NDUFB10,ND2,CYTB,NDUFV2,NDUFB7,C…
GO:BP	positive regulation of immune response	GO:0050778	FALSE	3.1889997683914963e-12	11.496345512298683	760	6042	319	21026	IRAK3,SH2D1A,PYHIN1,CD3G,FZD5,HLA-DPB1,LTF,C1RL,ELANE,PLEKHA1,CD1C,CD8A,CLEC4E,TNFSF13,XCL1,SH2B2,SKAP1,BTN3A2,TLR2,FCRL3,CLU,CD3D,CR1,TBX21,C3AR1,IL1R1,IRGM,SERPING1,F2RL1,RNF135,NAIP,CD177,MS4A1,KLRC4,CD8B,CTSG,BMX,LAMP1,ZDHHC3,PPP6C,TNFSF12,UFD1L,CD3E,CHUK,NFKBID,RTN4,UBE2K,INPP5D,VAV3,ITGB2,PTPRC,MFHAS1,UBQLN1,UBASH3A,TRIM41,CD300A,BTN2A1,PLCG1,PLCG2,ITK,TRAF6,EXOSC3,NFAM1,FGR,NFKBIA,MED1,SAR…
GO:BP	endomembrane system organization	GO:0010256	FALSE	3.6288978419555756e-12	11.440225257563968	613	6042	267	21026	STX17,KCNE1,SPINK2,CSRP3,ABCD2,SHTN1,SYP,FOLR3,SEC31B,CLU,ATP8B4,CR1,RAB30,AQP1,ABCD1,TOR1A,DYM,ATP6V1D,CDC42,PAFAH1B1,PLEC,RTN4,PLSCR3,HDAC3,BROX,COX4NB,VTI1A,SERP1,PLEKHA3,VCPIP1,SH3GLB1,TOR1AIP2,REEP5,PTPRC,TSG101,RAB2A,TOR1AIP1,HGS,CCDC47,COG7,CHMP2A,DEGS1,ZMPSTE24,PDCD10,VPS13B,ATP6AP1,SEC22B,BLOC1S3,RAB18,CHMP3,ARFGEF1,HPS6,ANO9,RAB7A,CHMP1B,ATP6AP2,SNX10,TBPL1,ATP6V0C,RAB1A,LYST,ZFYVE27,VP…
GO:BP	positive regulation of cell communication	GO:0010647	FALSE	3.693207900764866e-12	11.432596244037736	1795	6042	664	21026	RETN,GPR18,MMP8,GRB10,PFKFB2,IL7R,NDST1,TSHZ3,IGF1R,S100A12,GADD45A,LTF,HAX1,TNIK,ALOX15B,ELANE,FGF9,GPR174,TGFBR3,ABAT,OCIAD2,NSG1,RRAGD,EGF,MARCO,PROS1,HINT1,MAOA,MMP9,CTSD,NRG1,KIAA0319,S100B,EPHA4,TLR2,CYFIP1,CYP1B1,FCRL3,IRS2,THBS1,SELP,ITGB3,HSP90AB1,CENPJ,GEN1,INHBA,HIP1,IL1R1,HPSE,IRGM,SPHK1,RPS7,F2RL1,NAIP,AKR1C3,CDCA8,PDE6H,CD63,MYC,GSK3A,WAC,CTBP2,NACC2,LAMTOR2,ZDHHC3,MBD2,TNFSF12,CDC4…
GO:BP	positive regulation of signaling	GO:0023056	FALSE	4.22855353894904e-12	11.373808166308867	1796	6042	664	21026	RETN,GPR18,MMP8,GRB10,PFKFB2,IL7R,NDST1,TSHZ3,IGF1R,S100A12,GADD45A,LTF,HAX1,TNIK,ALOX15B,ELANE,FGF9,GPR174,TGFBR3,ABAT,OCIAD2,NSG1,RRAGD,EGF,MARCO,PROS1,HINT1,MAOA,MMP9,CTSD,NRG1,KIAA0319,S100B,EPHA4,TLR2,CYFIP1,CYP1B1,FCRL3,IRS2,THBS1,SELP,ITGB3,HSP90AB1,CENPJ,GEN1,INHBA,HIP1,IL1R1,HPSE,IRGM,SPHK1,RPS7,F2RL1,NAIP,AKR1C3,CDCA8,PDE6H,CD63,MYC,GSK3A,WAC,CTBP2,NACC2,LAMTOR2,ZDHHC3,MBD2,TNFSF12,CDC4…
GO:BP	cellular respiration	GO:0045333	FALSE	4.5797022966811556e-12	11.339162752369669	242	6042	128	21026	NDUFS4,NDUFA4,ABCD1,NDUFB1,COX6A1,NDUFA1,PLEC,UQCR11,NDUFB4,SURF1,NDUFA2,COX7A2,NDUFB3,COX7B,UQCR10,UQCRQ,COX5A,UQCRFS1,NDUFB6,ATP7A,IFNAR1,NDUFAF1,ND5,COX8A,PIK3CA,ATP6,ATP5J,BID,MYBBP1A,SDHB,COX5B,SLC25A25,COX3,SDHD,COX6B1,COX2,DNAJC30,IREB2,CBFA2T3,ND4,IDH3A,NDUFB5,PUM2,NDUFA8,AK4,TAZ,NDUFS6,NDUFC1,COX7A2L,ISCU,SDHC,NDUFS2,GHITM,PANK2,SLC25A23,COQ10A,PINK1,NDUFB11,TRAP1,COX1,UQCRB,VCP,NDUFC2,I…
GO:BP	ATP biosynthetic process	GO:0006754	FALSE	4.627754825878978e-12	11.334629657626158	102	6042	68	21026	NDUFS4,NDUFB1,NDUFA1,NDUFB4,NDUFA2,NDUFB3,NDUFB6,ND5,ATP6V0C,ATP6,ATP5J,SDHB,SDHD,DNAJC30,ND4,NDUFB5,ATP6V1A,NDUFA8,TMSB4X,TAZ,NDUFS6,NDUFC1,SDHC,NDUFS2,PINK1,NDUFB11,VCP,PRKAG2,NDUFC2,NDUFB10,ND2,NDUFV2,NDUFB7,NDUFA9,SDHA,NDUFS7,ENO1,TGFB1,NDUFA12,PARP1,SLC25A13,ND4L,NDUFA11,ATP5MF,NDUFS5,NDUFB2,ATP5ME,NDUFS3,ATP5MG,ATP5MJ,ATP5MC2,NDUFS8,ANTKMT,ATP5F1D,UQCC3,ATP5MK,ATP5F1E,ATP5PO,NDUFV1,NUDT2,ND…
GO:BP	electron transport chain	GO:0022900	FALSE	4.917774444617619e-12	11.308231394203304	126	6042	79	21026	NDUFS4,NDUFA4,NDUFB1,COX6A1,NDUFA1,PLEC,UQCR11,NDUFB4,NDUFA2,COX7A2,NDUFB3,COX7B,UQCR10,UQCRQ,COX5A,UQCRFS1,NDUFB6,NDUFAF1,ND5,COX8A,BID,MYBBP1A,SDHB,COX5B,COX3,SDHD,COX6B1,COX2,ND4,NDUFB5,PUM2,NDUFA8,TAZ,NDUFS6,NDUFC1,COX7A2L,ISCU,SDHC,NDUFS2,GHITM,PINK1,COX1,UQCRB,NDUFC2,CYB561,NDUFB10,ND2,CYTB,NDUFV2,NDUFB7,ENOX2,NDUFA9,SDHA,NDUFS7,GBA,AIFM2,NDUFA12,ND4L,WDR93,NDUFS5,COX4I1,NDUFB2,COX7C,NDUFS3…
GO:BP	positive regulation of RNA biosynthetic process	GO:1902680	FALSE	5.3621395099877734e-12	11.270661890907098	1699	6042	632	21026	MAFG,IKZF3,PYHIN1,RORA,KLF12,FZD5,CSRP3,HAX1,ASPH,EOMES,CEBPA,MAML1,EGF,KDM7A,DDX17,SKAP1,TCF4,TLR2,MAPK14,ZNF473,ACTR6,CENPJ,INHBA,TBX21,MORF4L2,CARF,NHLH1,NR1D2,F2RL1,ZNF319,CEBPE,GFI1B,MED21,MYC,STAT4,PLAGL1,TFEB,ACTR2,GSK3A,WAC,TAF12,ELF4,KLF13,ACTR3,RLF,SRCAP,CTBP2,CDK7,MBD2,YY1,FLI1,TADA3,VEZF1,TP53,MTA3,CHUK,ZNF507,LMO7,ARID1A,SERTAD1,HDAC3,IER2,GPBP1,MYCBP,ATN1,EPAS1,PHF2,CRTC2,EPC2,PDGFB…
GO:BP	purine ribonucleoside triphosphate biosynthetic process	GO:0009206	FALSE	5.571616303862434e-12	11.254018799436333	113	6042	73	21026	NME7,NDUFS4,NDUFB1,NDUFA1,NDUFB4,NDUFA2,NDUFB3,NDUFB6,IMPDH1,ND5,ATP6V0C,ATP6,ATP5J,SDHB,SDHD,DNAJC30,ND4,NDUFB5,ATP6V1A,NDUFA8,TMSB4X,TAZ,NDUFS6,NDUFC1,SDHC,NDUFS2,PINK1,NDUFB11,VCP,PRKAG2,NDUFC2,IMPDH2,NDUFB10,ND2,NDUFV2,NDUFB7,NDUFA9,SDHA,NDUFS7,ENO1,TGFB1,NDUFA12,PARP1,SLC25A13,ND4L,NDUFA11,ATP5MF,NDUFS5,NDUFB2,ATP5ME,NME3,NDUFS3,ATP5MG,ATP5MJ,ATP5MC2,NDUFS8,ANTKMT,ATP5F1D,UQCC3,ATP5MK,ATP5F1…
GO:BP	mononuclear cell differentiation	GO:1903131	FALSE	5.709797329885489e-12	11.24337930682849	534	6042	238	21026	GPR18,ITM2A,IKZF3,CD3G,IL7R,RORA,FZD5,EOMES,CEBPA,TRPM2,CD8A,CLEC4E,LY9,MMP9,PGLYRP1,RHOH,TLR2,FCRL3,CD83,CD3D,CR1,INHBA,TBX21,SEMA4A,F2RL1,MS4A1,CEBPE,MYC,STAT4,YY1,CDC42,CD27,TP53,CD3E,NFKBID,ARID1A,TCF7,INPP5D,PTPRC,PREX1,ZMIZ1,SP3,TUSC2,ATP7A,NFIL3,PLCG2,FNIP1,RB1,MEN1,VEGFA,SLC25A5,RBPJ,ITK,UCP2,TRAF6,NFAM1,ZFP36L1,MED1,ADAM8,NR3C1,STAT5B,CCR6,CD46,LYN,FOXO3,IRF4,CAMK4,FADD,GPR183,PTGER4,RIP…
GO:BP	positive regulation of DNA-templated transcription	GO:0045893	FALSE	6.226338645784694e-12	11.205767262067257	1697	6042	631	21026	MAFG,IKZF3,PYHIN1,RORA,KLF12,FZD5,CSRP3,HAX1,ASPH,EOMES,CEBPA,MAML1,EGF,KDM7A,DDX17,SKAP1,TCF4,TLR2,MAPK14,ZNF473,ACTR6,CENPJ,INHBA,TBX21,MORF4L2,CARF,NHLH1,NR1D2,F2RL1,ZNF319,CEBPE,GFI1B,MED21,MYC,STAT4,PLAGL1,TFEB,ACTR2,GSK3A,WAC,TAF12,ELF4,KLF13,ACTR3,RLF,SRCAP,CTBP2,CDK7,MBD2,YY1,FLI1,TADA3,VEZF1,TP53,MTA3,CHUK,ZNF507,LMO7,ARID1A,SERTAD1,HDAC3,IER2,GPBP1,MYCBP,ATN1,EPAS1,PHF2,CRTC2,EPC2,PDGFB…
GO:BP	negative regulation of nucleobase-containing compound metabolic process	GO:0045934	FALSE	6.9415294682952325e-12	11.158544828326477	1529	6042	576	21026	MAFG,ZNF134,KLF12,TSHZ3,GADD45A,ZNF141,BCL7A,EOMES,CDK5R1,ELANE,CEBPA,FGF9,ATXN1L,XCL1,NRG1,MAPK14,SATB1,GZMA,ACTR6,TBX21,IFI27,SOX6,FOXQ1,NR1D2,SIAH2,SCAI,PTPRK,GFI1B,JDP2,MYC,PLAGL1,NACC1,GSK3A,CTBP2,NACC2,MBD2,DR1,YY1,CBX3,TADA3,TP53,MTA3,MIER1,CUL3,CSDE1,SAMD1,JAZF1,KLF3,CBX5,KDM4A,HDAC3,ZNF350,TMBIM6,THAP1,ATN1,UBE2D3,TCF7,HNRNPC,TRIM33,PDGFB,SAP30,SAP130,TRIM24,HMGA1,SUPT4H1,TSG101,SETD5,RA…
GO:BP	regulation of autophagy	GO:0010506	FALSE	7.787181840046204e-12	11.108619683887826	367	6042	176	21026	FZD5,HAX1,CDK5R1,WIPI1,RRAGD,ZDHHC19,IRGM,SLC7A5,MTMR3,TFEB,GSK3A,UBE2A,WAC,ATP6V1D,PIK3C3,TP53,KDM4A,ROCK1,CASP3,USP33,SH3GLB1,GNAI3,UBQLN1,PHF23,ATP6V0E1,RHEB,WDR6,ZMPSTE24,TAB2,SEC22B,TMEM59,SLC25A5,NRBP2,TSPO,ATP6V1C1,ATP6V0C,PIK3CA,RRAGA,SNX6,FOXO3,DAPK3,LRRK2,C9ORF72,ATG12,HMOX1,SNX18,PYCARD,TLR9,PIP4K2C,EHMT2,USP13,IL10,MTMR4,SETD2,VPS26A,RALB,LRSAM1,ATP6V1E1,TOM1,ULK3,NPC1,USP20,HMGB1,EXO…
GO:BP	negative regulation of intracellular signal transduction	GO:1902532	FALSE	8.98289121274827e-12	11.046583859807912	662	6042	283	21026	IRAK3,RORA,IGF1R,OTUD3,PLEKHA1,TGFBR3,THEM4,PRKACB,MMP9,RHOH,SIRPA,EPHA4,THBS1,DUSP5,MAPK14,CLU,IRGM,F2RL1,SH3BP1,SCAI,GRINA,MYC,GSK3A,HERPUD1,MARK3,PPP6C,HYOU1,SEC13,PAFAH1B1,UFD1L,EIF3A,CUL3,HOMER3,SZT2,PPP1R15B,HDAC3,TMBIM6,TAOK3,PRKAR1B,PTPRC,UBQLN1,TNFAIP1,CDKN2D,CD300A,FNIP1,MEN1,WDR59,STMN3,PPM1B,NFKBIA,HYAL2,UBE2W,FBP1,MOB4,PDCD6,RIOK3,TAX1BP1,VPS18,MGRN1,LYN,LRRK2,PIK3IP1,PYDC1,DYRK1A,Q1…
GO:BP	nucleoside triphosphate biosynthetic process	GO:0009142	FALSE	9.359260746228167e-12	11.028758453239773	127	6042	79	21026	NME7,NDUFS4,AK3,CMPK2,NDUFB1,NDUFA1,NDUFB4,NDUFA2,NDUFB3,CAD,NDUFB6,IMPDH1,ND5,TBPL1,ATP6V0C,ATP6,ATP5J,SDHB,SDHD,DNAJC30,ND4,NDUFB5,ATP6V1A,NDUFA8,AK4,TMSB4X,TAZ,NDUFS6,NDUFC1,SDHC,NDUFS2,PINK1,NDUFB11,VCP,PRKAG2,NDUFC2,IMPDH2,NDUFB10,ND2,NDUFV2,NDUFB7,NDUFA9,SDHA,NDUFS7,ENO1,TGFB1,NDUFA12,PARP1,SLC25A13,ND4L,NDUFA11,ATP5MF,NDUFS5,NDUFB2,ATP5ME,NME3,NDUFS3,ATP5MG,ATP5MJ,ATP5MC2,NDUFS8,ANTKMT,ATP…
GO:BP	vacuole organization	GO:0007033	FALSE	1.050293338483588e-11	10.978689389032104	239	6042	126	21026	STX17,WIPI1,CTSD,IRGM,MTMR3,TFEB,LAMP1,ATP6V1D,PIK3C3,GAA,SH3GLB1,UBQLN1,PHF23,CREG1,CHMP2A,GRN,FNIP1,ATP6AP1,TMEM199,SEC22B,CHMP3,NPR2,TRAF6,RAB7A,CHMP1B,ATP6AP2,ATP6V0C,RAB1A,VPS18,LRRK2,C9ORF72,ATG12,SNX18,VPS4B,UBXN2B,PIP4K2C,EHMT2,CHMP7,RALB,LRSAM1,TOM1,RAB5A,ATG9B,ULK3,ARL8B,ATP13A2,GABARAPL2,RAB34,SNX30,RB1CC1,RAB3GAP2,ATG5,LAMP2,ATP6V1A,WIPI2,PIK3C2B,RAB43,HOOK3,CHMP1A,ATG3,ATP6V0A1,IFT20…
GO:BP	purine nucleoside triphosphate biosynthetic process	GO:0009145	FALSE	1.1145577368137623e-11	10.952897429085816	114	6042	73	21026	NME7,NDUFS4,NDUFB1,NDUFA1,NDUFB4,NDUFA2,NDUFB3,NDUFB6,IMPDH1,ND5,ATP6V0C,ATP6,ATP5J,SDHB,SDHD,DNAJC30,ND4,NDUFB5,ATP6V1A,NDUFA8,TMSB4X,TAZ,NDUFS6,NDUFC1,SDHC,NDUFS2,PINK1,NDUFB11,VCP,PRKAG2,NDUFC2,IMPDH2,NDUFB10,ND2,NDUFV2,NDUFB7,NDUFA9,SDHA,NDUFS7,ENO1,TGFB1,NDUFA12,PARP1,SLC25A13,ND4L,NDUFA11,ATP5MF,NDUFS5,NDUFB2,ATP5ME,NME3,NDUFS3,ATP5MG,ATP5MJ,ATP5MC2,NDUFS8,ANTKMT,ATP5F1D,UQCC3,ATP5MK,ATP5F1…
GO:BP	proteasome-mediated ubiquitin-dependent protein catabolic process	GO:0043161	FALSE	1.2797652374667654e-11	10.892869690839378	414	6042	193	21026	KLHL20,XPO1,TTC36,TRIM71,CEBPA,TRIB2,ANKRD9,HSP90AB1,CLU,TBX21,IFI27,SIAH2,PSMF1,PSMD4,TRIP12,GSK3A,UBE2A,WAC,PSMB4,ANAPC11,UFD1L,PSMB10,RNF139,CUL3,FBXO44,APC,UBE2K,UBE2D3,PSMC1,FBXL5,SHARPIN,PSMD13,PSMA7,PSMD7,TNFAIP1,PSMD6,ZER1,USP38,UBE2W,FBXL22,TRIM28,SUMO1,RAD23B,HECTD3,FEM1C,PSMB3,PSMD12,PSMA6,PSMB9,LRRK2,PSMB1,Q16594,SPOPL,TRAF4,TRIP4,ANAPC13,HSPA1A,UBXN2B,FBXO11,AGAP3,CTNNB1,ADRM1,RFFL,P…
GO:BP	protein phosphorylation	GO:0006468	FALSE	1.3383506651558365e-11	10.873430080896144	1227	6042	475	21026	IRAK3,IGF1R,TTC36,S100A12,GADD45A,LTF,HAX1,TNIK,NDUFS4,CDK5R1,ELANE,MAP3K15,FGF9,MAML1,MAP3K21,EGF,TRIB2,PRKACB,SRPK1,MMP9,NRG1,SIRPA,EPHA4,TLR2,THBS1,MAPK14,ITGB3,AATK,PPP4R1,IRGM,NUAK1,SPHK1,FECH,CTSG,BMX,GSK3A,CTDSP1,CALM2,MARK3,CDK7,SCYL2,TADA3,TP53,ANKK1,CD3E,MINK1,CHUK,SERTAD1,PPP1R15B,HDAC3,APC,MAP3K3,ROCK1,UBE2K,TAOK3,PRKAR1B,PDGFB,ITGB2,PTPRC,SPDYE2,TSG101,CAD,TGFBR1,CDKN2D,HGS,STK19,CD3…
GO:BP	homeostatic process	GO:0042592	FALSE	1.8857037806781236e-11	10.72452652820565	1736	6042	641	21026	GRB10,HK2,CACNB2,IL7R,RORA,IGF1R,LCN2,PNPLA2,PRKAB2,CSRP3,ASPH,TNS2,ELANE,CEBPA,RHD,GPR174,TRPM2,TGFBR3,ABAT,OCIAD2,PRLH,IQCB1,CES1,XCL1,CLIC4,CYBRD1,SH2B2,PRKACB,ALAS2,PIWIL4,RHCE,TBXAS1,IRS2,MAPK14,ANKRD9,ITGB3,GP1BA,TESMIN,SLC24A3,INHBA,ASGR2,ATP7B,SUCNR1,VSIG1,AQP1,ABCD1,NR1D2,OSCAR,RNF135,PDK4,G6PD,FECH,GP1BB,SLC25A40,CCR5,GRINA,MYC,RYR1,HK3,LAMP1,KLF13,HERPUD1,CALM2,ATP6V1D,LSR,SLC34A1,ORMD…
GO:BP	inflammatory response	GO:0006954	FALSE	2.16526671453385e-11	10.664488600227036	862	6042	351	21026	MMP8,KLRG1,RORA,PTX3,NDST1,FCER1A,LTB4R,S100A12,CSRP3,HP,ABCD2,ELANE,CEBPA,ADORA3,ORM2,XCL1,CD163,MMP9,PGLYRP1,SIRPA,CXCR6,TLR2,OLR1,THBS1,MAPK14,SELP,AZU1,GZMA,IL1R2,CLU,S1PR3,C3AR1,IFI27,IL1R1,IRGM,SUCNR1,SPHK1,ABCD1,NR1D2,F2RL1,NAIP,PF4V1,PLA2G7,TNFAIP6,ADM,CCR5,PSMB4,ELF4,CHUK,NFKBID,CUL3,RTN4,PRCP,CASP3,MGST2,SHARPIN,ITGB2,PTPRC,TOLLIP,MFHAS1,TUSC2,PLCG1,ZNF580,PLCG2,GRN,TAB2,RB1,RBPJ,ALOX5,…
GO:BP	cell population proliferation	GO:0008283	FALSE	2.5115006575743697e-11	10.600066703795141	2015	6042	730	21026	MAFG,IKZF3,IL7R,RORA,NDST1,CEACAM6,FZD5,IGF1R,HLA-DPB1,VCAN,ARG1,LTF,VEGFC,BCL7A,ASPH,TRIM71,TNS2,ALOX15B,ELANE,CEBPA,FGF9,TGFBR3,ADORA3,ATXN1L,TNFSF13,XCL1,CLEC12B,EGF,UTP20,MMP9,CAMP,NRG1,S100B,EPHA4,PAK1IP1,TLR2,CYP1B1,FCRL3,IRS2,THBS1,MAPK14,ITGB3,CLU,CR1,INHBA,S1PR3,HPSE,NUAK1,SLC7A5,SPHK1,IL13RA1,PTGS1,AQP1,GAB2,F2RL1,DPP4,NDUFAF4,MS4A1,AKR1C3,PTPRK,ADM,CFDP1,ABCB1,MYC,STAT4,NACC1,GNB1,HAPL…
GO:BP	immune response-regulating signaling pathway	GO:0002764	FALSE	2.6373206924109573e-11	10.578837057739232	540	6042	238	21026	IRAK3,SH2D1A,CD3G,FCER1A,HLA-DPB1,LTF,GP6,PLEKHA1,CD8A,CLEC4E,SH2B2,CLEC12B,SKAP1,BTN3A2,TLR2,LAIR2,FCRL3,CD3D,CR1,C3AR1,IRGM,F2RL1,OSCAR,RNF135,NAIP,MS4A1,KLRC4,CD8B,VSTM1,BMX,ZDHHC3,PPP6C,UFD1L,CD3E,CHUK,NFKBID,RTN4,INPP5D,VAV3,PTPRC,MFHAS1,UBQLN1,UBASH3A,CD300A,BTN2A1,PLCG1,PLCG2,ITK,TRAF6,NFAM1,FGR,NFKBIA,SARM1,RIOK3,TLR8,FCHO1,PIK3CA,TAX1BP1,MAP2K4,LYN,TYROBP,IRF3,IRF4,PYCARD,HSPA1A,CMTM3,XI…
GO:BP	response to biotic stimulus	GO:0009607	FALSE	2.8046473663027165e-11	10.552121735654232	1634	6042	607	21026	MMP8,IRAK3,TRAV5,IKZF3,KLRB1,SH2D1A,PYHIN1,KLRG1,IL7R,FKBP5,PTX3,DAO,FZD5,CHIT1,ARG1,S100A12,LCN2,BPI,LTF,HP,CRISP3,ABCD2,TRGV9,C1RL,RNASE1,DEFA4,ELANE,TRGV5,OCIAD2,CLEC4E,CLEC5A,XCL1,MPO,CLEC12B,LY9,MARCO,SRPK1,DDX17,MMP9,CAMP,PGLYRP1,SIRPA,TLR2,FCRL3,MAPK14,SELP,AZU1,GZMA,TRAV13-2,SLPI,CLU,CR1,TBX21,TRAV13-1,RNASE3,IFI27,IRGM,TRDV2,SERPING1,SLC7A5,SLAMF7,AQP1,PADI4,F2RL1,RNF135,NAIP,DDX60L,CD17…
GO:BP	regulation of developmental process	GO:0050793	FALSE	2.8538914749547763e-11	10.544562545841	2457	6042	870	21026	RETN,MAFG,HK2,APCDD1,GPR171,IKZF3,IL7R,RORA,IGF1R,VCAN,GADD45A,LTF,VEGFC,BCL7A,CSRP3,HAX1,TNIK,ALOX15B,CDK5R1,CEBPA,FGF9,SORT1,TGFBR3,KREMEN1,PRLH,IQCB1,MAML1,TNFSF13,EGF,TRIB2,FGD4,DDX17,MMP9,SHTN1,CAMP,PGLYRP1,RHOH,NRG1,TCF4,KIAA0319,S100B,EPHA4,PTGR3,TLR2,CYFIP1,CYP1B1,FCRL3,THBS1,B4GALT5,MAPK14,CD83,ITGB3,HSP90AB1,MBOAT2,HECW2,CR1,INHBA,TBX21,S1PR3,C3AR1,SEMA4A,HPSE,SLC7A5,SPHK1,H4C3,SOX6,AQP…
GO:BP	proton transmembrane transport	GO:1902600	TRUE	3.357506282738111e-11	10.473983165984357	190	6042	105	21026	NDUFS4,NDUFA4,NDUFB1,ATP6V1D,NDUFA1,NDUFB4,SURF1,NDUFA2,NDUFB3,COX7B,UQCR10,COX5A,UQCRFS1,ATP6V0E1,NDUFB6,ATP6AP1,SLC25A5,UCP2,ATP6V1C1,ND5,ATP6AP2,COX8A,ATP6V0C,ATP6,ATP5J,FXYD2,SLC25A3,SLC4A11,COX5B,SLC9B2,ATP6V1E1,COX3,COX6B1,COX2,SLC17A5,ND4,NDUFB5,ATP6V1A,NDUFA8,NDUFS6,NDUFC1,COX7A2L,ATP6V0A1,NDUFS2,GHITM,SLC36A1,COX1,ATP6V1G1,TCIRG1,COX17,NDUFC2,ATP6V0E2,NDUFB10,ATP6V1F,ND2,SLC9A7,CYTB,NDUF…
GO:BP	negative regulation of RNA metabolic process	GO:0051253	FALSE	3.6686022804255214e-11	10.435499368314655	1400	6042	530	21026	MAFG,ZNF134,KLF12,TSHZ3,GADD45A,ZNF141,BCL7A,EOMES,CDK5R1,ELANE,CEBPA,FGF9,ATXN1L,XCL1,NRG1,MAPK14,SATB1,ACTR6,TBX21,IFI27,SOX6,FOXQ1,NR1D2,SIAH2,SCAI,PTPRK,GFI1B,JDP2,MYC,PLAGL1,NACC1,CTBP2,NACC2,MBD2,DR1,YY1,CBX3,TADA3,TP53,MTA3,MIER1,CUL3,CSDE1,SAMD1,JAZF1,KLF3,CBX5,KDM4A,HDAC3,ZNF350,THAP1,ATN1,UBE2D3,TCF7,HNRNPC,TRIM33,PDGFB,SAP30,SAP130,TRIM24,HMGA1,SUPT4H1,TSG101,SETD5,RARG,MECP2,CREG1,SP3…
GO:BP	purine ribonucleoside triphosphate metabolic process	GO:0009205	FALSE	5.130541425995227e-11	10.28983680137657	253	6042	130	21026	HK2,PFKFB2,NME7,NDUFS4,AK3,HK3,NDUFB1,NDUFA1,NDUFB4,NDUFA2,NDUFB3,GNAI3,PGAM4,NDUFB6,RHOQ,CLPX,IMPDH1,UCP2,TSPO,ND5,FBP1,ATP6V0C,ATP6,ATP5J,LRRK2,PFKFB1,HDAC4,HSPA1A,NMNAT1,SDHB,ENO3,BPGM,SLC25A25,SDHD,DNAJC30,IER3,NADK,PGM1,CBFA2T3,ND4,PGK1,SLC4A1,NDUFB5,ATP6V1A,NDUFA8,AK4,TMSB4X,TAZ,NDUFS6,NDUFC1,ENO2,APP,NT5E,SDHC,NDUFS2,IGF1,PRKAA1,PINK1,NDUFB11,VCP,PRKAG2,ABCC6,NDUFC2,MYH3,IMPDH2,PFKP,PGAM1,…
GO:BP	negative regulation of RNA biosynthetic process	GO:1902679	FALSE	5.19960417679212e-11	10.284029716053272	1296	6042	495	21026	MAFG,ZNF134,KLF12,TSHZ3,GADD45A,ZNF141,BCL7A,EOMES,CDK5R1,ELANE,CEBPA,FGF9,ATXN1L,XCL1,NRG1,SATB1,ACTR6,TBX21,IFI27,SOX6,FOXQ1,NR1D2,SIAH2,SCAI,PTPRK,GFI1B,JDP2,MYC,PLAGL1,NACC1,CTBP2,NACC2,MBD2,DR1,YY1,CBX3,TADA3,TP53,MTA3,MIER1,CUL3,SAMD1,JAZF1,KLF3,CBX5,KDM4A,HDAC3,ZNF350,THAP1,ATN1,UBE2D3,TCF7,TRIM33,PDGFB,SAP30,SAP130,TRIM24,HMGA1,SUPT4H1,TSG101,SETD5,RARG,MECP2,CREG1,SP3,KLF2,SAP30L,NFIL3,F…
GO:BP	negative regulation of programmed cell death	GO:0043069	FALSE	5.502763465080391e-11	10.259419154827977	905	6042	364	21026	IL7R,KLHL20,CEACAM6,IGF1R,LTF,HAX1,RNF144B,CLEC5A,MPO,RPS3A,SERPINB2,MMP9,NRG1,EPHA4,IRS2,THBS1,ITGB3,AZU1,HSP90AB1,CLU,GBE1,SLC7A5,SPHK1,AQP1,FOXQ1,SIAH2,NAIP,PDK4,NDUFAF4,CFDP1,CCR5,GRINA,MYC,BNIP2,HERPUD1,HYOU1,CD27,TP53,RAD21,GNAI2,HDAC3,PTRH2,TMBIM6,ROCK1,DDAH2,DNAJC5,TGFBR1,MECP2,CDKN2D,KRT18,DPP8,PLCG2,PDCD10,GRN,ARF4,RB1,VEGFA,SLC25A5,HTATIP2,UCP2,NRBP2,MAZ,MED1,DAD1,ADAM8,TXNDC5,LTK,HMGB…
GO:BP	response to peptide	GO:1901652	FALSE	6.592922392813071e-11	10.180922036431545	962	6042	383	21026	MMP8,HK2,IRAK3,TIMP2,PYHIN1,IL7R,RORA,KLHL20,ARG1,VEGFC,HAX1,CEBPA,ST3GAL6,XCL1,SH2B2,CAMP,SIRPA,CXCR6,TLR2,CYP1B1,IRS2,THBS1,MAPK14,SELP,HSP90AB1,IL1R2,INHBA,IFI27,IL1R1,IRGM,SPHK1,IL13RA1,F2RL1,NAIP,PF4V1,CCR5,CTSG,STAT4,ACTR2,GSK3A,ACTR3,YY1,CDC42,SLC34A1,PAFAH1B1,TP53,CHUK,AGPAT2,KLF3,KIF5B,UBE2K,YTHDF3,CASP3,TCF7,DOK1,SHARPIN,STXBP3,PDGFB,PTPRC,TOLLIP,RARG,KRT18,KLF2,CD58,TRIM41,MAPK11,NFIL3…
GO:BP	ribonucleoside triphosphate biosynthetic process	GO:0009201	FALSE	7.033065027765854e-11	10.152855367078372	119	6042	74	21026	NME7,NDUFS4,NDUFB1,NDUFA1,NDUFB4,NDUFA2,NDUFB3,CAD,NDUFB6,IMPDH1,ND5,ATP6V0C,ATP6,ATP5J,SDHB,SDHD,DNAJC30,ND4,NDUFB5,ATP6V1A,NDUFA8,TMSB4X,TAZ,NDUFS6,NDUFC1,SDHC,NDUFS2,PINK1,NDUFB11,VCP,PRKAG2,NDUFC2,IMPDH2,NDUFB10,ND2,NDUFV2,NDUFB7,NDUFA9,SDHA,NDUFS7,ENO1,TGFB1,NDUFA12,PARP1,SLC25A13,ND4L,NDUFA11,ATP5MF,NDUFS5,NDUFB2,ATP5ME,NME3,NDUFS3,ATP5MG,ATP5MJ,ATP5MC2,NDUFS8,ANTKMT,ATP5F1D,UQCC3,ATP5MK,AT…
GO:BP	negative regulation of DNA-templated transcription	GO:0045892	FALSE	7.253131229281174e-11	10.139474464874239	1280	6042	489	21026	MAFG,ZNF134,KLF12,TSHZ3,GADD45A,ZNF141,BCL7A,EOMES,CDK5R1,ELANE,CEBPA,FGF9,ATXN1L,XCL1,NRG1,SATB1,ACTR6,TBX21,IFI27,SOX6,FOXQ1,NR1D2,SIAH2,SCAI,PTPRK,GFI1B,JDP2,MYC,PLAGL1,NACC1,CTBP2,NACC2,MBD2,DR1,YY1,CBX3,TADA3,TP53,MTA3,MIER1,CUL3,SAMD1,JAZF1,KLF3,CBX5,KDM4A,HDAC3,ZNF350,THAP1,ATN1,UBE2D3,TCF7,TRIM33,PDGFB,SAP30,SAP130,TRIM24,HMGA1,SUPT4H1,TSG101,SETD5,RARG,MECP2,CREG1,SP3,KLF2,SAP30L,NFIL3,F…
GO:BP	regulation of cell activation	GO:0050865	FALSE	8.132675147799022e-11	10.08976657484555	632	6042	269	21026	MMP8,IKZF3,IL7R,RORA,HLA-DPB1,ARG1,BPI,HSPH1,CEBPA,GP6,TNFSF13,XCL1,PGLYRP1,RHOH,SIRPA,FCRL3,IRS2,THBS1,TIGIT,CD83,SELP,PEAR1,GP1BA,CR1,INHBA,TBX21,IRGM,SPHK1,DPP4,GP1BB,CTSG,TNFSF12,CD27,CD3E,NFKBID,ARID1A,CASP3,SIT1,TCF7,INPP5D,VAV3,PDGFB,PTPRC,MFHAS1,ZMIZ1,CD300A,GRN,BLOC1S3,TRAF6,EXOSC3,NFAM1,TNFRSF14,FGR,ZFP36L1,ADAM8,TMX1,SUPT6H,JAK2,FCHO1,PIK3CA,STAT5B,CD46,LYN,FOXO3,TYROBP,LRRK2,IRF4,CAMK…
GO:BP	ATP metabolic process	GO:0046034	FALSE	8.272795571472358e-11	10.082347707363478	229	6042	120	21026	HK2,PFKFB2,NDUFS4,HK3,NDUFB1,NDUFA1,NDUFB4,NDUFA2,NDUFB3,PGAM4,NDUFB6,CLPX,UCP2,TSPO,ND5,FBP1,ATP6V0C,ATP6,ATP5J,PFKFB1,HDAC4,HSPA1A,NMNAT1,SDHB,ENO3,BPGM,SLC25A25,SDHD,DNAJC30,IER3,NADK,PGM1,CBFA2T3,ND4,PGK1,SLC4A1,NDUFB5,ATP6V1A,NDUFA8,AK4,TMSB4X,TAZ,NDUFS6,NDUFC1,ENO2,APP,NT5E,SDHC,NDUFS2,IGF1,PRKAA1,PINK1,NDUFB11,VCP,PRKAG2,ABCC6,NDUFC2,MYH3,PFKP,PGAM1,COL6A1,ARL2,NDUFB10,ND2,NDUFV2,ALDOC,ATP…
GO:BP	regulation of multicellular organismal development	GO:2000026	FALSE	8.5718709438088e-11	10.066924376222559	1418	6042	534	21026	RETN,MAFG,HK2,GPR171,IKZF3,IL7R,VCAN,GADD45A,LTF,VEGFC,HAX1,ALOX15B,CEBPA,FGF9,TGFBR3,EGF,MMP9,SHTN1,CAMP,PGLYRP1,RHOH,NRG1,KIAA0319,EPHA4,TLR2,CYFIP1,CYP1B1,FCRL3,THBS1,B4GALT5,MAPK14,CD83,ITGB3,MBOAT2,CR1,INHBA,TBX21,S1PR3,C3AR1,SEMA4A,HPSE,SLC7A5,SPHK1,H4C3,SOX6,AQP1,G6PD,TNFAIP6,ADM,GFI1B,MYC,CD101,TRIP12,GSK3A,HAPLN2,KLF13,CTDSP1,DR1,YY1,TNFSF12,TADA3,CD27,CCM2,PAFAH1B1,VEZF1,TP53,NFKBID,RTN…
GO:BP	regulation of leukocyte activation	GO:0002694	FALSE	9.314829479364025e-11	10.030825091046761	576	6042	249	21026	MMP8,IKZF3,IL7R,RORA,HLA-DPB1,ARG1,BPI,HSPH1,CEBPA,TNFSF13,XCL1,PGLYRP1,RHOH,SIRPA,FCRL3,IRS2,THBS1,TIGIT,CD83,CR1,INHBA,TBX21,IRGM,SPHK1,DPP4,CTSG,TNFSF12,CD27,CD3E,NFKBID,ARID1A,CASP3,SIT1,TCF7,INPP5D,VAV3,PTPRC,MFHAS1,ZMIZ1,CD300A,GRN,BLOC1S3,TRAF6,EXOSC3,NFAM1,TNFRSF14,FGR,ZFP36L1,ADAM8,SUPT6H,JAK2,FCHO1,PIK3CA,STAT5B,CD46,LYN,FOXO3,TYROBP,LRRK2,IRF4,CAMK4,CD6,FADD,BID,GPR183,FOXJ1,MZB1,CCDC8…
GO:BP	positive regulation of intracellular signal transduction	GO:1902533	FALSE	9.531165803361999e-11	10.020853975437046	1113	6042	433	21026	GPR18,NDST1,IGF1R,S100A12,GADD45A,LTF,HAX1,TNIK,ALOX15B,ELANE,FGF9,GPR174,TGFBR3,RRAGD,EGF,MARCO,PROS1,HINT1,NRG1,KIAA0319,S100B,TLR2,FCRL3,IRS2,THBS1,SELP,ITGB3,GEN1,INHBA,HIP1,HPSE,SPHK1,RPS7,F2RL1,NAIP,AKR1C3,CDCA8,PDE6H,MYC,WAC,CTBP2,NACC2,LAMTOR2,ZDHHC3,CDC42,CD27,SEC13,TP53,CD3E,MINK1,CHUK,MIER1,CUL3,RTN4,GNAI2,HDAC3,MAP3K3,ROCK1,TAOK3,DOK1,SHARPIN,VAV3,PDGFB,PTPRC,MFHAS1,TGFBR1,PICALM,KLF2…
GO:BP	T cell activation	GO:0042110	FALSE	1.0144901406027367e-10	9.993752169333083	582	6042	251	21026	GPR18,IKZF3,CD3G,IL7R,RORA,FZD5,HLA-DPB1,ARG1,HSPH1,EOMES,CD1C,CD8A,CLEC4E,XCL1,LY9,RHOH,SIRPA,TIGIT,CD83,CD3D,CR1,TBX21,SEMA4A,SLAMF7,F2RL1,DPP4,CD8B,CTSG,STAT4,ELF4,CD27,TP53,PSMB10,CD3E,NFKBID,ARID1A,CASP3,SIT1,TCF7,PTPRC,PREX1,ZMIZ1,SP3,CD300A,ATP7A,MEN1,ITK,TRAF6,TNFRSF14,ZFP36L1,ADAM8,JAK2,FCHO1,PIK3CA,STAT5B,CCR6,CD46,LYN,FOXO3,TYROBP,PIK3CG,IRF4,CAMK4,CD6,FADD,BID,GPR183,PTGER4,FOXJ1,CCDC…
GO:BP	regulation of molecular function	GO:0065009	FALSE	1.0567723713071308e-10	9.976018549619218	1496	6042	559	21026	IRAK3,CACNB2,TIMP2,PYHIN1,KCNE1,PTX3,S100A12,GADD45A,LTF,HP,ASPH,EOMES,PPP1R17,CDK5R1,ELANE,SORT1,ADORA3,XCL1,CLEC12B,EGF,TRIB2,FGD4,MMP9,NRG1,EPHA4,TLR2,CYP1B1,IRS2,THBS1,MAPK14,ITGB3,GZMA,PPP1R26,SLPI,CLU,CR1,IRGM,SPHK1,RPS7,F2RL1,SH3BP1,UBLCP1,GSK3A,CALM2,MARK3,YWHAB,TP53,MINK1,CHUK,SZT2,SERTAD1,GNAI2,APC,TBC1D2,TMBIM6,ROCK1,TAOK3,DOCK9,GSTM2,CRTC2,SNX13,USP33,VAV3,PDGFB,ITGB2,GLA,TOR1AIP2,KCN…
GO:BP	response to other organism	GO:0051707	FALSE	1.1570049911010506e-10	9.936664767579824	1592	6042	590	21026	MMP8,IRAK3,TRAV5,IKZF3,KLRB1,SH2D1A,PYHIN1,KLRG1,IL7R,FKBP5,PTX3,DAO,FZD5,CHIT1,ARG1,S100A12,LCN2,BPI,LTF,HP,CRISP3,ABCD2,TRGV9,C1RL,RNASE1,DEFA4,ELANE,TRGV5,OCIAD2,CLEC4E,CLEC5A,XCL1,MPO,CLEC12B,LY9,MARCO,SRPK1,DDX17,MMP9,CAMP,PGLYRP1,SIRPA,TLR2,FCRL3,MAPK14,SELP,AZU1,GZMA,TRAV13-2,SLPI,CLU,CR1,TBX21,TRAV13-1,RNASE3,IFI27,IRGM,TRDV2,SERPING1,SLC7A5,SLAMF7,AQP1,PADI4,F2RL1,RNF135,NAIP,DDX60L,CD17…
GO:BP	regulation of transcription by RNA polymerase II	GO:0006357	FALSE	1.174554447335376e-10	9.93012684637958	2578	6042	904	21026	MAFG,IKZF3,ZNF134,RORA,KLF12,TSHZ3,FZD5,GADD45A,ZNF141,BCL7A,CSRP3,HAX1,EOMES,ELANE,CEBPA,FGF9,ZNF527,MAML1,ATXN1L,KDM7A,DDX17,SKAP1,TCF4,ZNF566,TLR2,ZNF347,MAPK14,SATB1,ZNF473,FOXO3B,INHBA,TBX21,ZNF260,ZNF571,IFI27,ZNF14,SOX6,CARF,NHLH1,FOXQ1,NR1D2,F2RL1,ZNF319,ZNF195,CEBPE,ZFP30,GFI1B,MED21,JDP2,DMRTC2,MYC,STAT4,PLAGL1,TFEB,NACC1,ACTR2,FOXN2,GSK3A,TAF12,ELF4,KLF13,CTDSP1,ACTR3,RLF,SRCAP,CTBP2,C…
GO:BP	positive regulation of signal transduction	GO:0009967	FALSE	1.4013567148223165e-10	9.853451301145382	1578	6042	585	21026	GPR18,MMP8,GRB10,IL7R,NDST1,IGF1R,S100A12,GADD45A,LTF,HAX1,TNIK,ALOX15B,ELANE,FGF9,GPR174,TGFBR3,OCIAD2,RRAGD,EGF,MARCO,PROS1,HINT1,MAOA,MMP9,CTSD,NRG1,KIAA0319,S100B,TLR2,CYFIP1,CYP1B1,FCRL3,IRS2,THBS1,SELP,ITGB3,HSP90AB1,CENPJ,GEN1,INHBA,HIP1,IL1R1,HPSE,IRGM,SPHK1,RPS7,F2RL1,NAIP,AKR1C3,CDCA8,PDE6H,CD63,MYC,GSK3A,WAC,CTBP2,NACC2,LAMTOR2,ZDHHC3,MBD2,TNFSF12,CDC42,CRADD,CD27,SEC13,PAFAH1B1,TP53,C…
GO:BP	import into cell	GO:0098657	FALSE	1.4273154857291537e-10	9.845480022282825	922	6042	368	21026	PTX3,ELANE,SORT1,TRPM2,OCIAD2,REPS2,EGF,MARCO,SYP,RHOH,NRG1,SIRPA,TLR2,IRS2,THBS1,PEAR1,ITGB3,AZU1,CLU,ABCA13,ASGR2,HIP1,SLC7A5,SPHK1,F2RL1,DPP4,SH3BP1,CD177,MS4A1,CEBPE,ADM,MCTP1,CLTCL1,DNAJC6,CD63,TOR1A,CALM2,ARPC3,CDC42,PIK3C3,SCYL2,SLC34A1,ROCK1,EPN1,USP33,VAV3,ITGB2,KCNQ1,PTPRC,TSG101,VAC14,PICALM,CREG1,TUSC2,HGS,CD300A,RHOQ,PLCG2,CLIP3,MKLN1,VEGFA,ARHGAP27,LMBRD1,FGR,RAB7A,KCNJ14,SNX10,CD30…
GO:BP	response to external biotic stimulus	GO:0043207	FALSE	1.7347617544846595e-10	9.76076016111364	1595	6042	590	21026	MMP8,IRAK3,TRAV5,IKZF3,KLRB1,SH2D1A,PYHIN1,KLRG1,IL7R,FKBP5,PTX3,DAO,FZD5,CHIT1,ARG1,S100A12,LCN2,BPI,LTF,HP,CRISP3,ABCD2,TRGV9,C1RL,RNASE1,DEFA4,ELANE,TRGV5,OCIAD2,CLEC4E,CLEC5A,XCL1,MPO,CLEC12B,LY9,MARCO,SRPK1,DDX17,MMP9,CAMP,PGLYRP1,SIRPA,TLR2,FCRL3,MAPK14,SELP,AZU1,GZMA,TRAV13-2,SLPI,CLU,CR1,TBX21,TRAV13-1,RNASE3,IFI27,IRGM,TRDV2,SERPING1,SLC7A5,SLAMF7,AQP1,PADI4,F2RL1,RNF135,NAIP,DDX60L,CD17…
GO:BP	regulation of apoptotic signaling pathway	GO:2001233	FALSE	1.8853132397865262e-10	9.724616482588706	380	6042	177	21026	MMP9,NRG1,THBS1,CLU,INHBA,RPS7,SIAH2,GRINA,MYC,HERPUD1,NACC2,TNFSF12,HYOU1,CRADD,TP53,GNAI2,TMBIM6,SGMS1,PTPRC,UBQLN1,TGFBR1,BCL2L12,CDKN2D,STYXL1,RB1,SLC25A5,MAZ,SP100,HYAL2,HMGB2,JAK2,TRAF7,RET,LRRK2,Q16594,FADD,STX4,BID,RIPK1,HMOX1,PTTG1IP,PYCARD,HSPA1A,STK3,ING2,CTNNB1,PPP2R1A,PAK2,CD44,CX3CR1,IL10,RFFL,PMAIP1,TLR4,SYVN1,STK4,TMC8,SERINC3,IER3,ITPRIP,RB1CC1,IL1B,MAGED1,RRN3,RTKN2,GSTP1,ACVR1,…
GO:BP	regulation of macroautophagy	GO:0016241	FALSE	1.8896661052686216e-10	9.723614926752564	184	6042	101	21026	FZD5,CDK5R1,WIPI1,ZDHHC19,IRGM,GSK3A,UBE2A,WAC,ATP6V1D,PIK3C3,TP53,CASP3,SH3GLB1,GNAI3,UBQLN1,PHF23,ATP6V0E1,RHEB,SEC22B,SLC25A5,NRBP2,TSPO,ATP6V1C1,ATP6V0C,PIK3CA,SNX6,LRRK2,C9ORF72,ATG12,HMOX1,SNX18,PIP4K2C,EHMT2,VPS26A,RALB,LRSAM1,ATP6V1E1,TOM1,NPC1,EXOC8,ATP13A2,SNX30,RAB3GAP2,ATG5,QSOX1,ATP6V1A,HDAC6,ATP6V0A1,PINK1,TBK1,SUPT5H,SPTLC1,ATP6V1G1,FEZ2,ATP6V0E2,PARL,MAP3K7,CALCOCO2,SESN1,SCFD1,UB…
GO:BP	negative regulation of apoptotic process	GO:0043066	FALSE	2.0845483309087696e-10	9.680988031166777	874	6042	351	21026	IL7R,KLHL20,CEACAM6,IGF1R,LTF,HAX1,RNF144B,CLEC5A,MPO,RPS3A,SERPINB2,MMP9,NRG1,EPHA4,IRS2,THBS1,ITGB3,AZU1,HSP90AB1,CLU,GBE1,SLC7A5,SPHK1,AQP1,FOXQ1,SIAH2,NAIP,PDK4,NDUFAF4,CFDP1,CCR5,GRINA,MYC,BNIP2,HERPUD1,HYOU1,CD27,TP53,RAD21,GNAI2,HDAC3,PTRH2,TMBIM6,ROCK1,DDAH2,DNAJC5,TGFBR1,MECP2,CDKN2D,KRT18,PDCD10,GRN,ARF4,RB1,VEGFA,SLC25A5,HTATIP2,UCP2,NRBP2,MAZ,MED1,DAD1,ADAM8,TXNDC5,LTK,HMGB2,JAK2,PIK3…
GO:BP	regulation of response to external stimulus	GO:0032101	FALSE	2.1458591128387247e-10	9.668398795196387	1082	6042	421	21026	GPR18,MMP8,IRAK3,KLRB1,SH2D1A,PYHIN1,RORA,IGF1R,ARG1,S100A12,LTF,VEGFC,ELANE,CEBPA,KREMEN1,CLEC4E,XCL1,CLEC12B,SERPINB2,PROS1,MMP9,PGLYRP1,SIRPA,KIAA0319,EPHA4,TLR2,FCRL3,THBS1,MAPK14,AZU1,GP1BA,NMT2,CR1,C3AR1,IL1R1,HPSE,IRGM,SERPING1,SUCNR1,SPHK1,KIF21A,MPP1,NR1D2,F2RL1,RNF135,NAIP,DPP4,PLA2G7,TNFAIP6,KLRC4,LAMP1,PSMB4,ELF4,ZDHHC3,PPP6C,UFD1L,CHUK,RTN4,UBE2K,YTHDF3,CASP3,MGST2,SHARPIN,PDGFB,PTPR…
GO:BP	regulation of catalytic activity	GO:0050790	FALSE	2.4602984660244123e-10	9.609012204163003	928	6042	369	21026	IRAK3,TIMP2,PTX3,S100A12,GADD45A,LTF,HP,PPP1R17,CDK5R1,ELANE,SORT1,ADORA3,TRIB2,FGD4,NRG1,EPHA4,IRS2,THBS1,MAPK14,ITGB3,GZMA,PPP1R26,CR1,IRGM,RPS7,F2RL1,SH3BP1,GSK3A,CALM2,YWHAB,TP53,SZT2,SERTAD1,GNAI2,APC,TBC1D2,TMBIM6,ROCK1,TAOK3,DOCK9,SNX13,VAV3,PDGFB,ITGB2,GLA,PTPRC,GNAI3,SPDYE2,TSG101,TERF2,CDKN2D,HGS,CD300A,ATP7A,PDCD10,MAP3K5,GRN,TAB2,RB1,MIDN,MEN1,SERINC1,STMN3,ARFGEF1,TRAF6,ABR,MID1IP1,P…
GO:BP	positive regulation of cell activation	GO:0050867	FALSE	2.5310149209457176e-10	9.596705294563085	381	6042	177	21026	MMP8,IL7R,HLA-DPB1,HSPH1,CEBPA,TNFSF13,XCL1,RHOH,SIRPA,FCRL3,IRS2,THBS1,CD83,SELP,PEAR1,GP1BA,CR1,TBX21,IRGM,DPP4,GP1BB,TNFSF12,CD27,CD3E,NFKBID,ARID1A,INPP5D,VAV3,PTPRC,ZMIZ1,BLOC1S3,TRAF6,EXOSC3,TNFRSF14,ADAM8,JAK2,FCHO1,PIK3CA,STAT5B,CD46,LYN,FOXO3,TYROBP,LRRK2,CD6,FADD,GPR183,CCDC88B,PYCARD,TLR9,CD5,EBI3,FCGR3A,B2M,CAPN3,IL10,LILRB4,BRD4,TLR4,CD28,PLEK,FOXP3,SLC7A1,HLA-DRB5,HMGB1,EXOSC6,ZNF33…
GO:BP	ribonucleoside triphosphate metabolic process	GO:0009199	FALSE	2.7674224313143414e-10	9.557924543213202	260	6042	131	21026	HK2,PFKFB2,NME7,NDUFS4,AK3,HK3,NDUFB1,NDUFA1,NDUFB4,NDUFA2,NDUFB3,GNAI3,CAD,PGAM4,NDUFB6,RHOQ,CLPX,IMPDH1,UCP2,TSPO,ND5,FBP1,ATP6V0C,ATP6,ATP5J,LRRK2,PFKFB1,HDAC4,HSPA1A,NMNAT1,SDHB,ENO3,BPGM,SLC25A25,SDHD,DNAJC30,IER3,NADK,PGM1,CBFA2T3,ND4,PGK1,SLC4A1,NDUFB5,ATP6V1A,NDUFA8,AK4,TMSB4X,TAZ,NDUFS6,NDUFC1,ENO2,APP,NT5E,SDHC,NDUFS2,IGF1,PRKAA1,PINK1,NDUFB11,VCP,PRKAG2,ABCC6,NDUFC2,MYH3,IMPDH2,PFKP,PG…
GO:BP	purine nucleoside triphosphate metabolic process	GO:0009144	FALSE	2.7674224313143414e-10	9.557924543213202	260	6042	131	21026	HK2,PFKFB2,NME7,NDUFS4,AK3,HK3,NDUFB1,NDUFA1,NDUFB4,NDUFA2,NDUFB3,GNAI3,PGAM4,NDUFB6,RHOQ,CLPX,IMPDH1,UCP2,TSPO,ND5,FBP1,ATP6V0C,ATP6,ATP5J,LRRK2,PFKFB1,HDAC4,HSPA1A,NMNAT1,SDHB,ENO3,BPGM,SLC25A25,SDHD,DNAJC30,IER3,NADK,PGM1,CBFA2T3,ND4,PGK1,SLC4A1,NDUFB5,ATP6V1A,NDUFA8,AK4,TMSB4X,TAZ,NDUFS6,NDUFC1,ENO2,APP,NT5E,SDHC,NDUFS2,IGF1,NUDT16,PRKAA1,PINK1,NDUFB11,VCP,PRKAG2,ABCC6,NDUFC2,MYH3,IMPDH2,PFKP…
GO:BP	carbohydrate metabolic process	GO:0005975	FALSE	2.824773244884851e-10	9.549016408887999	561	6042	242	21026	GRB10,HK2,PFKFB2,RORA,NDST1,CHIT1,PGM5,CHST13,WIPI1,ST3GAL6,EGF,FUT8,IRS2,SLC23A1,B4GALT5,MAPK14,GBE1,PFKFB4,PDK4,G6PD,TKTL1,HK3,B3GALT4,GSK3A,TP53,GAA,OVGP1,SERP1,CRTC2,PPP1R3E,PDGFB,EDEM1,GLA,PGM2,KCNQ1,GALNT7,FPGT,PGAM4,NANS,BRAT1,ZMPSTE24,UGP2,MIDN,SIK1,PGLS,UCP2,HYAL2,PPP1R3D,FBP1,NR3C1,PIK3CA,ST6GALNAC3,CHST15,GUSB,ENOSF1,PFKFB1,ATG12,GPD2,HDAC4,PGD,DERA,KAT2A,STK40,PMAIP1,ENO3,BPGM,EDEM3,U…
GO:BP	regulation of cellular response to stress	GO:0080135	FALSE	2.906127677363702e-10	9.536685309392283	519	6042	227	21026	IGF1R,BCL7A,KREMEN1,FUT8,KIAA0319,EPHA4,CLU,MORF4L2,ABRAXAS1,ABCD1,FECH,GRINA,MYC,ACTR2,TAF12,HERPUD1,NACC2,YY1,HYOU1,TADA3,TP53,PPP4R2,ARID1A,PPP1R15B,TMBIM6,TAOK3,EPC2,PNPLA8,TRRAP,UBQLN1,EP400,TERF2,CDKN2D,SENP3,NBR1,ZMPSTE24,PDCD10,GRN,ALOX5,FICD,NPAS2,ENY2,TMX1,ING3,TRIM28,LRRK2,DYRK1A,Q16594,MORF4L1,BID,PTTG1IP,COPS5,HSPA1A,ARL6IP5,ING2,DDX11,CD44,KAT2A,TAF10,USP13,UIMC1,PMAIP1,BRD4,OGG1,TL…
GO:BP	response to cytokine	GO:0034097	FALSE	3.057859935414638e-10	9.514582411229012	947	6042	375	21026	MMP8,HK2,IRAK3,TIMP2,PYHIN1,IL7R,RORA,KLHL20,ARG1,VEGFC,HAX1,CEBPA,ST3GAL6,XCL1,SH2B2,CAMP,SIRPA,CXCR6,TLR2,CYP1B1,THBS1,MAPK14,SELP,HSP90AB1,IL1R2,INHBA,IFI27,IL1R1,IRGM,SPHK1,IL13RA1,F2RL1,NAIP,PF4V1,CCR5,CTSG,STAT4,ACTR2,GSK3A,ACTR3,YY1,CDC42,PAFAH1B1,TP53,CHUK,AGPAT2,KIF5B,UBE2K,YTHDF3,CASP3,TCF7,DOK1,SHARPIN,STXBP3,PDGFB,PTPRC,TOLLIP,RARG,KRT18,KLF2,CD58,TRIM41,MAPK11,NFIL3,IL11RA,IFNAR2,UPF…
GO:BP	proton motive force-driven ATP synthesis	GO:0015986	FALSE	3.2473725324365695e-10	9.488467887074298	78	6042	54	21026	NDUFS4,NDUFB1,NDUFA1,NDUFB4,NDUFA2,NDUFB3,NDUFB6,ND5,ATP6V0C,ATP6,ATP5J,SDHB,SDHD,DNAJC30,ND4,NDUFB5,ATP6V1A,NDUFA8,NDUFS6,NDUFC1,SDHC,NDUFS2,NDUFB11,NDUFC2,NDUFB10,ND2,NDUFV2,NDUFB7,NDUFA9,SDHA,NDUFS7,NDUFA12,ND4L,NDUFA11,ATP5MF,NDUFS5,NDUFB2,ATP5ME,NDUFS3,ATP5MG,ATP5MJ,ATP5MC2,NDUFS8,ANTKMT,ATP5F1D,ATP5MK,ATP5F1E,ATP5PO,NDUFV1,NDUFB9,NDUFAB1,MT-ND3,ATP5MC3,MT-ND1
GO:BP	regulation of protein modification process	GO:0031399	FALSE	3.469034479395116e-10	9.459791383600828	1049	6042	409	21026	IRAK3,TTC36,S100A12,GADD45A,LTF,HAX1,TNIK,NDUFS4,CDK5R1,ELANE,FGF9,EGF,TRIB2,MMP9,NRG1,SIRPA,EPHA4,THBS1,ITGB3,HSP90AB1,IRGM,SPHK1,CEP78,RPS7,SIAH2,G6PD,FECH,COPS7B,GSK3A,HERPUD1,CTDSP1,CALM2,DR1,TADA3,TP53,CD3E,CUL3,SERTAD1,PPP1R15B,HDAC3,APC,UBE2K,TAOK3,EPAS1,PRKAR1B,PDGFB,ITGB2,PTPRC,TOLLIP,SPDYE2,TSG101,UBQLN1,TGFBR1,PHF23,CDKN2D,HGS,CD300A,BRAT1,PLCG2,WDFY2,PDCD10,MAP3K5,CLIP3,TAB2,FNIP1,RB1…
GO:BP	regulation of vesicle-mediated transport	GO:0060627	FALSE	3.525577557399165e-10	9.45277	531	6042	231	21026	PTX3,CDK5R1,EGF,NRG1,SIRPA,TLR2,ITGB3,AZU1,CLU,ABCA13,HIP1,SPHK1,GAB2,F2RL1,CD177,MCTP1,DNAJC6,CD63,TOR1A,LAMP1,ARPC3,CDC42,RNF139,ARHGAP1,GNAI2,ROCK1,CASP3,PRKAR1B,STXBP3,ITGB2,PTPRC,TSG101,DNAJC5,VAC14,PICALM,HGS,CD300A,PTPN23,CHMP2A,PLCG2,CLIP3,MKLN1,RAP1B,VEGFA,CHMP3,FGR,RAP1A,RAB7A,ARFIP1,VPS18,LYN,LDLRAP1,RAB21,LRRK2,EHD1,C9ORF72,STX4,TBC1D4,RAB2B,PYCARD,VPS4B,MYO18A,B2M,ITGAM,BET1L,MTMR4,L…
GO:BP	response to chemical	GO:0042221	FALSE	3.5450581185118223e-10	9.450376640497254	3909	6042	1312	21026	RETN,GPR18,MMP8,MTARC1,GRB10,HK2,IRAK3,TIMP2,PFKFB2,PYHIN1,IL7R,RORA,KLHL20,FKBP5,KCNE1,MGST1,IGF1R,ARG1,SLC28A3,S100A12,BPI,LTF,VEGFC,CSRP3,HP,HAX1,ASPH,RNF175,TNS2,NDUFS4,DEFA4,CDK5R1,ELANE,CEBPA,SORT1,TRPM2,PLEKHA1,RAB13,TGFBR3,ABAT,PRLH,NSG1,ST3GAL6,AGTRAP,RRAGD,CES1,XCL1,MPO,CLIC4,ABCC2,CYBRD1,SH2B2,HSD3B7,DDX17,MMP9,CTSD,CAMP,FUT8,NRG1,SIRPA,CXCR6,EPHA4,TLR2,CYFIP1,CYP1B1,TBXAS1,IRS2,SLC23A…
GO:BP	carbohydrate derivative biosynthetic process	GO:1901137	FALSE	4.3376792373618864e-10	9.362742566336184	594	6042	253	21026	ITM2A,NDST1,NME7,NDUFS4,CHST13,GALNT11,ST3GAL6,EGF,FUT8,B4GALT5,AK3,G6PD,CMPK2,B3GALT4,NDUFB1,NDUFA1,NDUFB4,PIGS,NDUFA2,NDUFB3,SERP1,PDGFB,PGM2,GALNT7,CAD,FPGT,NDUFB6,COG7,NANS,TMEM59,IMPDH1,NPR2,ARFGEF1,GALNT10,PIGU,UGGT1,DAD1,ND5,TBPL1,ATP6V0C,GALNT1,ATP6,ATP5J,ST6GALNAC3,C1GALT1C1,UBE2J1,PIGL,MGAT4B,TKT,SDHB,CTNNB1,MUSTN1,DPM1,ABCC5,EDEM3,UXS1,PIGT,DPY19L3,SDHD,GALNT3,NPC1,HS6ST1,DNAJC30,MPI,B…
GO:BP	regulation of protein stability	GO:0031647	FALSE	4.986284321430779e-10	9.3022229613501	335	6042	159	21026	PYHIN1,CCT2,ASPH,OTUD3,EPHA4,B4GALT5,HSP90AB1,CLU,ASGR2,HIP1,IRGM,ABTB3,RPS7,INSC,LAMP1,CDK7,TADA3,TP53,CCNH,RNF139,CUL3,RTN4,HDAC3,NAPG,CASP3,POLR2E,USP33,SH3GLB1,TRIM24,DAZAP2,COG7,PDCD10,GRN,SERF2,HCFC1,DAD1,MYLIP,SUMO1,RAB21,TYROBP,LRRK2,DDI2,Q16594,USP4,BAG4,PYCARD,HSPA1A,STK3,RASSF2,GOLGA7,KAT2A,USP13,CAPN3,SYVN1,PTEN,STK4,TMC8,RABL3,NR1D1,FBXW11,ATP1B3,RPAP3,IFI30,MFSD1,DNAJA3,BMP2,CEP63,P…
GO:BP	immune response-activating signaling pathway	GO:0002757	FALSE	5.969027194791116e-10	9.2240964424652	494	6042	217	21026	IRAK3,SH2D1A,CD3G,HLA-DPB1,LTF,PLEKHA1,CD8A,CLEC4E,SH2B2,SKAP1,BTN3A2,TLR2,FCRL3,CD3D,CR1,C3AR1,IRGM,F2RL1,RNF135,NAIP,MS4A1,KLRC4,CD8B,BMX,ZDHHC3,PPP6C,UFD1L,CD3E,CHUK,NFKBID,RTN4,INPP5D,VAV3,PTPRC,MFHAS1,UBQLN1,UBASH3A,CD300A,BTN2A1,PLCG1,PLCG2,ITK,TRAF6,NFAM1,FGR,NFKBIA,SARM1,RIOK3,TLR8,FCHO1,PIK3CA,TAX1BP1,LYN,TYROBP,IRF3,IRF4,PYCARD,HSPA1A,CMTM3,XIAP,TLR9,PAK2,PLA2G6,BANF1,LIME1,ITGAM,LILRB4…
GO:BP	B cell activation	GO:0042113	FALSE	7.18558647403523e-10	9.14353777978545	286	6042	140	21026	ITM2A,IKZF3,IL7R,TNFSF13,FCRL3,IRS2,CR1,INHBA,TBX21,MS4A1,YY1,TNFSF12,CD27,TP53,CASP3,INPP5D,VAV3,PTPRC,SP3,CD300A,PLCG2,FNIP1,SLC25A5,RBPJ,EXOSC3,NFAM1,ZFP36L1,SUPT6H,STAT5B,CCR6,LYN,TYROBP,GPR183,FOXJ1,HDAC4,MZB1,TLR9,IL10,TLR4,SYVN1,RABL3,CD28,TRAF3IP2,PLCL2,FCRL1,FOSL2,FOXP3,EXOSC6,LRRC8A,SYK,TNFRSF13B,CD79B,CD22,MALT1,PMS2,LFNG,TBC1D10C,MNDA,BTK,NOTCH2,SH3KBP1,CARD11,POU2F2,CDKN1A,SLC39A10,C…
GO:BP	positive regulation of leukocyte activation	GO:0002696	FALSE	7.220221794452612e-10	9.141449461346232	363	6042	169	21026	MMP8,IL7R,HLA-DPB1,HSPH1,CEBPA,TNFSF13,XCL1,RHOH,SIRPA,FCRL3,IRS2,THBS1,CD83,CR1,TBX21,IRGM,DPP4,TNFSF12,CD27,CD3E,NFKBID,ARID1A,INPP5D,VAV3,PTPRC,ZMIZ1,BLOC1S3,TRAF6,EXOSC3,TNFRSF14,ADAM8,JAK2,FCHO1,PIK3CA,STAT5B,CD46,LYN,FOXO3,TYROBP,LRRK2,CD6,FADD,GPR183,CCDC88B,PYCARD,TLR9,CD5,EBI3,FCGR3A,B2M,IL10,LILRB4,BRD4,TLR4,CD28,FOXP3,SLC7A1,HLA-DRB5,HMGB1,EXOSC6,ZNF335,SMARCD3,DNAJA3,SYK,IL1B,MALT1,PT…
GO:BP	ribosome biogenesis	GO:0042254	TRUE	7.483438186776072e-10	9.125898824264164	323	6042	154	21026	XPO1,RPLP0,RPS3A,DDX17,UTP20,RPF2,RBIS,PAK1IP1,SDAD1,RPS27L,ZNHIT3,RPS7,UTP14A,POP5,ERAL1,URB1,POP7,LSM6,RPL26L1,TRMT2B,EXOSC3,NSUN5,RIOK3,TRAF7,RRP1B,NOP10,NOL9,MYBBP1A,METTL17,PPAN,NOP2,RRP36,KRI1,EIF4A3,ERI3,MDN1,EXOSC6,RPS19BP1,RPL10L,RPUSD1,HEATR3,CINP,POP4,RRN3,RPL10,WDR74,NOC4L,NUDT16,RNASEL,ZNF622,RRP1,CUL4B,CHD7,MRM1,FCF1,PPAN-P2RY11,NSUN3,DDX31,TSC1,NAT10,EXOSC2,BMS1,TSR3,REXO4,UTP6,SUR…
GO:BP	immune effector process	GO:0002252	FALSE	8.028459985392626e-10	9.09536775285186	732	6042	300	21026	IRAK3,ITM2A,KLRB1,SH2D1A,IL7R,RORA,PTX3,DAO,FZD5,FCER1A,ARG1,EOMES,C1RL,ELANE,CD1C,CD8A,CLEC4E,TNFSF13,XCL1,MPO,CLEC12B,LY9,PGLYRP1,BTN3A2,FCRL3,AZU1,CLU,CR1,TBX21,SEMA4A,IL1R1,SERPING1,SLC7A5,SUCNR1,SLAMF7,GAB2,F2RL1,CD177,KLRC4,CTSG,STAT4,LAMP1,TNFSF12,CD27,TP53,PLEC,NFKBID,RTN4,KIF5B,TMBIM6,INPP5D,VAV3,IGLL5,STXBP3,ITGB2,PTPRC,IGLL1,TUSC2,CD300A,ATP7A,PLCG2,GRN,MEN1,TRAF6,EXOSC3,TNFRSF14,FGR,S…
GO:BP	nucleoside triphosphate metabolic process	GO:0009141	FALSE	8.324464048377044e-10	9.079643717980819	276	6042	136	21026	HK2,PFKFB2,NME7,NDUFS4,AK3,CMPK2,HK3,NDUFB1,NDUFA1,NDUFB4,NDUFA2,NDUFB3,GNAI3,CAD,PGAM4,NDUFB6,RHOQ,CLPX,IMPDH1,UCP2,TSPO,ND5,FBP1,TBPL1,ATP6V0C,ATP6,ATP5J,LRRK2,PFKFB1,HDAC4,HSPA1A,NMNAT1,SDHB,ENO3,BPGM,SLC25A25,SDHD,DNAJC30,SMPDL3A,IER3,NADK,PGM1,CBFA2T3,ND4,PGK1,SLC4A1,NDUFB5,ATP6V1A,NDUFA8,AK4,TMSB4X,TAZ,NDUFS6,NDUFC1,ENO2,APP,NT5E,SDHC,NDUFS2,IGF1,NUDT16,PRKAA1,PINK1,NDUFB11,VCP,PRKAG2,ABCC6…
GO:BP	proton motive force-driven mitochondrial ATP synthesis	GO:0042776	FALSE	9.553133828604566e-10	9.019854138236933	67	6042	48	21026	NDUFS4,NDUFB1,NDUFA1,NDUFB4,NDUFA2,NDUFB3,NDUFB6,ND5,ATP6,ATP5J,SDHB,SDHD,DNAJC30,ND4,NDUFB5,NDUFA8,NDUFS6,NDUFC1,SDHC,NDUFS2,NDUFB11,NDUFC2,NDUFB10,ND2,NDUFV2,NDUFB7,NDUFA9,SDHA,NDUFS7,NDUFA12,ND4L,NDUFA11,ATP5MF,NDUFS5,NDUFB2,ATP5ME,NDUFS3,ATP5MG,NDUFS8,ANTKMT,ATP5F1D,ATP5F1E,ATP5PO,NDUFV1,NDUFB9,NDUFAB1,MT-ND3,MT-ND1
GO:BP	regulation of biosynthetic process	GO:0009889	FALSE	1.2666793028420987e-9	8.897333325633992	5809	6042	1880	21026	MAFG,GPR18,TDRD9,MMP8,GRB10,IRAK3,ITM2A,IKZF3,PYHIN1,ZNF134,IL7R,RORA,PTX3,CCT2,KLF12,TSHZ3,FZD5,IGF1R,ATF7IP2,CLEC3B,HLA-DPB1,ARG1,S100A12,BPI,HSPH1,GADD45A,ZNF141,LTF,BCL7A,CSRP3,HAX1,ASPH,EOMES,ABCD2,TRIM71,MIS18A,ALOX15B,CDK5R1,ELANE,CEBPA,FGF9,GPR174,SORT1,TGFBR3,ADORA3,ZNF527,MAML1,ZNF22,ATXN1L,ORM2,CLEC4E,TNFSF13,CLEC5A,CES1,XCL1,ABCC2,EGF,TRIB2,KDM7A,PRKACB,LY9,HINT1,SRPK1,DDX17,SKAP1,PGL…
GO:BP	regulation of defense response	GO:0031347	FALSE	1.70404880356222e-9	8.768517971298042	809	6042	325	21026	MMP8,IRAK3,KLRB1,SH2D1A,PYHIN1,RORA,ARG1,S100A12,LTF,ELANE,CEBPA,CLEC4E,XCL1,CLEC12B,MMP9,PGLYRP1,SIRPA,TLR2,FCRL3,MAPK14,CR1,IL1R1,IRGM,SERPING1,SUCNR1,SPHK1,NR1D2,F2RL1,RNF135,NAIP,PLA2G7,TNFAIP6,KLRC4,LAMP1,PSMB4,ELF4,ZDHHC3,PPP6C,UFD1L,CHUK,RTN4,UBE2K,YTHDF3,CASP3,MGST2,SHARPIN,PTPRC,MFHAS1,UBQLN1,TRIM41,CD300A,PLCG1,PLCG2,ZMPSTE24,USP38,GRN,RB1,TRAF6,ALOX5,PPM1B,FGR,NFKBIA,HYAL2,MED1,SARM1,N…
GO:BP	positive regulation of protein metabolic process	GO:0051247	FALSE	2.0671980140899595e-9	8.684617920901625	1039	6042	402	21026	PYHIN1,CLEC3B,S100A12,LTF,HAX1,TNIK,ASPH,ELANE,CEBPA,FGF9,EGF,TRIB2,MMP9,NRG1,EPHA4,CYP1B1,THBS1,ITGB3,RPS27L,CLU,GUF1,CR1,INHBA,IRGM,SPHK1,EIF5A2,MYC,GSK3A,HERPUD1,CALM2,TNFSF12,TP53,CD3E,RNF139,CUL3,CSDE1,HDAC3,APC,UBE2K,TAOK3,YTHDF3,CASP3,SERP1,PSMC1,FBXL5,PDGFB,PTPRC,TOLLIP,SPDYE2,UBQLN1,PHF23,PICALM,KLF2,ZER1,BRAT1,PLCG2,WDFY2,PDCD10,MAP3K5,CLIP3,GRN,TAB2,FNIP1,SEC22B,VEGFA,SLCO3A1,TRAF6,TNF…
GO:BP	regulation of lymphocyte activation	GO:0051249	FALSE	2.9324025389406634e-9	8.53277641314377	509	6042	220	21026	IKZF3,IL7R,HLA-DPB1,ARG1,HSPH1,TNFSF13,XCL1,PGLYRP1,RHOH,SIRPA,FCRL3,IRS2,TIGIT,CD83,CR1,INHBA,TBX21,DPP4,CTSG,TNFSF12,CD27,CD3E,NFKBID,ARID1A,CASP3,SIT1,TCF7,INPP5D,VAV3,PTPRC,ZMIZ1,CD300A,BLOC1S3,TRAF6,EXOSC3,NFAM1,TNFRSF14,FGR,ZFP36L1,ADAM8,SUPT6H,JAK2,FCHO1,PIK3CA,STAT5B,CD46,LYN,FOXO3,TYROBP,IRF4,CAMK4,CD6,FADD,BID,GPR183,FOXJ1,MZB1,CCDC88B,PYCARD,TLR9,CD5,CTNNB1,EBI3,FCGR3A,B2M,KAT2A,IL10,L…
GO:BP	immune response-regulating cell surface receptor signaling pathway	GO:0002768	FALSE	3.093517711290218e-9	8.509547393174419	341	6042	159	21026	SH2D1A,CD3G,FCER1A,HLA-DPB1,LTF,PLEKHA1,CD8A,CLEC4E,SH2B2,CLEC12B,SKAP1,BTN3A2,TLR2,FCRL3,CD3D,CR1,C3AR1,F2RL1,OSCAR,MS4A1,KLRC4,CD8B,BMX,CD3E,CHUK,NFKBID,INPP5D,VAV3,PTPRC,MFHAS1,UBASH3A,CD300A,BTN2A1,PLCG1,PLCG2,ITK,TRAF6,NFAM1,FGR,NFKBIA,FCHO1,PIK3CA,TAX1BP1,MAP2K4,LYN,TYROBP,IRF3,CMTM3,PAK2,PLA2G6,LIME1,FCGR3A,ITGAM,LILRB4,TLR4,NINJ1,PAK1,CD28,NR1D1,NMI,PLCL2,TRAT1,TLR1,FOSL2,CYBA,FOXP3,SLA2,…
GO:BP	positive regulation of gene expression	GO:0010628	FALSE	3.602713958910076e-9	8.443370217754852	1212	6042	458	21026	MAFG,MMP8,IRAK3,IL7R,RORA,FZD5,CLEC3B,HLA-DPB1,ALOX15B,ELANE,CEBPA,FGF9,TGFBR3,ORM2,CLEC4E,TNFSF13,CLEC5A,XCL1,EGF,LY9,BTN3A2,TLR2,CYP1B1,THBS1,TIGIT,MAPK14,CD83,ITGB3,AZU1,RPS27L,CLU,GUF1,SLC24A3,INHBA,TBX21,C3AR1,IL1R1,HPSE,SLC7A5,SPHK1,RPS7,F2RL1,EIF5A2,RNF135,NAIP,CEBPE,MYC,GSK3A,RLF,EIF1,YY1,TNFSF12,TADA3,TP53,CD3E,RAD21,CHUK,AGPAT2,RTN4,CSDE1,ARID1A,PRDX6,KDM4A,ROCK1,YTHDF3,SERP1,PHF2,HNRNP…
GO:BP	cell cycle	GO:0007049	FALSE	4.131811086104791e-9	8.383859543429722	1663	6042	604	21026	TDRD9,IGF1R,XPO1,GADD45A,BCL7A,TUBGCP5,TRIM71,MIS18A,ALOX15B,CDK5R1,CEBPA,EGF,SRPK1,TUBE1,PIWIL4,MAPK14,HSP90AB1,CENPJ,GEN1,TESMIN,HECW2,RPS27L,INHBA,MORF4L2,ABRAXAS1,SPHK1,MTMR3,PTPRK,SLC26A8,GFI1B,ABCB1,CLTCL1,CDCA8,INSC,DMRTC2,MYC,PLAGL1,ACTR2,CEP68,UBE2A,WAC,CTDSP1,ACTR3,CALM2,CDK7,MIIP,PPP6C,DR1,YY1,CDC42,PIK3C3,TADA3,PAFAH1B1,ANAPC11,TP53,ANKK1,PLEC,MTA3,MAPRE1,CCNH,RAD21,C6ORF89,CUL3,NAA60…
GO:BP	MAPK cascade	GO:0000165	FALSE	4.627530063752061e-9	8.334650751077659	744	6042	301	21026	GRB10,IRAK3,NDST1,IGF1R,S100A12,GADD45A,TNIK,ELANE,MAP3K15,FGF9,MAP3K21,EGF,MARCO,NRG1,SIRPA,EPHA4,FCRL3,THBS1,DUSP5,MAPK14,ITGB3,INHBA,SPHK1,F2RL1,NAIP,CCR5,PDE6H,MYC,LAMTOR2,CDC42,CD27,CCM2,PAFAH1B1,MINK1,EIF3A,GNAI2,HDAC3,MAP3K3,ROCK1,TAOK3,SH2D3C,DOK1,PDGFB,PTPRC,SLA,MFHAS1,NBR1,CD300A,RNF13,MAPK11,PLCG2,PDCD10,MAP3K5,GLIPR2,RAP1B,MEN1,VEGFA,NPR2,TRAF6,SH2D3A,MAP4K1,ZFP36L1,RAP1A,HYAL2,IQGAP1…
GO:BP	cellular response to cytokine stimulus	GO:0071345	FALSE	5.587472233551603e-9	8.252784622042608	854	6042	338	21026	MMP8,HK2,IRAK3,PYHIN1,IL7R,RORA,ARG1,VEGFC,HAX1,CEBPA,ST3GAL6,XCL1,SH2B2,CAMP,SIRPA,CXCR6,TLR2,CYP1B1,THBS1,MAPK14,HSP90AB1,IL1R2,INHBA,IFI27,IL1R1,IRGM,SPHK1,IL13RA1,F2RL1,NAIP,PF4V1,CCR5,CTSG,STAT4,ACTR2,GSK3A,ACTR3,YY1,CDC42,PAFAH1B1,TP53,CHUK,AGPAT2,KIF5B,UBE2K,YTHDF3,TCF7,DOK1,SHARPIN,STXBP3,PDGFB,PTPRC,TOLLIP,RARG,KRT18,KLF2,CD58,TRIM41,MAPK11,NFIL3,IL11RA,IFNAR2,UPF1,PDCD10,PRPF8,MAP3K5,IF…
GO:BP	regulation of cell population proliferation	GO:0042127	FALSE	6.186283680724432e-9	8.20857016869294	1685	6042	610	21026	MAFG,IKZF3,IL7R,CEACAM6,FZD5,IGF1R,HLA-DPB1,VCAN,ARG1,LTF,VEGFC,BCL7A,ASPH,TRIM71,TNS2,ALOX15B,ELANE,CEBPA,FGF9,TGFBR3,ADORA3,ATXN1L,TNFSF13,XCL1,EGF,UTP20,MMP9,CAMP,NRG1,S100B,EPHA4,TLR2,CYP1B1,FCRL3,IRS2,THBS1,MAPK14,ITGB3,CLU,CR1,INHBA,S1PR3,HPSE,NUAK1,SLC7A5,SPHK1,IL13RA1,PTGS1,AQP1,GAB2,DPP4,NDUFAF4,AKR1C3,PTPRK,ADM,CFDP1,MYC,STAT4,NACC1,HAPLN2,KLF13,CTBP2,NACC2,MBD2,TNFSF12,CDC42,MARCKSL1,B…
GO:BP	regulation of cellular localization	GO:0060341	FALSE	6.351652008986383e-9	8.197113303829846	1013	6042	391	21026	PFKFB2,PYHIN1,KCNE1,CCT2,FZD5,XPO1,VEGFC,CSRP3,HAX1,ASPH,CDK5R1,ABAT,EGF,CTSD,TLR2,IRS2,MAPK14,ITGB3,HSP90AB1,CENPJ,IFI27,F2RL1,TNFAIP6,TOR1A,LAMP1,GSK3A,MARK3,CDC42,RNF139,ARHGAP1,RTN4,AAAS,HDAC3,KIF5B,APC,TMEM30A,TMBIM6,UBE2D3,SERP1,VCPIP1,SH3GLB1,EDEM1,ITGB2,REEP5,MFHAS1,TSG101,MECP2,PICALM,TNNC1,PTPN23,RHOQ,SSH1,PDCD10,CLIP3,MIDN,TMEM59,VEGFA,LZTS2,CHMP3,UCP2,TRAF6,ALOX5,PPP1R12A,TXN,ZFP36L1,…
GO:BP	nucleotide metabolic process	GO:0009117	FALSE	7.0042554872902654e-9	8.154638020969987	493	6042	213	21026	HK2,PFKFB2,TPST1,RORA,NME7,NDUFS4,HINT1,AK3,MPP1,G6PD,CMPK2,HK3,NDUFB1,PDE7A,GMPR2,TP53,NDUFA1,NDUFB4,NDUFA2,NDUFB3,GNAI3,CAD,PGAM4,NDUFB6,RHOQ,NUDT3,CLPX,AK8,IMPDH1,PGLS,NPR2,UCP2,TSPO,SARM1,ND5,FBP1,TBPL1,ATP6V0C,ATP6,ATP5J,NEIL2,LRRK2,PFKFB1,GPD2,HDAC4,NEIL1,PGD,HSPA1A,NMNAT1,TKT,SDHB,DERA,OGG1,ENO3,BPGM,SLC25A25,SDHD,TYMP,TALDO1,DNAJC30,IER3,NADK,PGM1,CBFA2T3,ND4,ABHD14B,PGK1,SULT1B1,RRM2,SLC…
GO:BP	organophosphate metabolic process	GO:0019637	FALSE	7.084145950291797e-9	8.149712499888313	1077	6042	412	21026	HK2,PFKFB2,TPST1,RORA,PLBD1,ALOX15B,NME7,NDUFS4,HINT1,FUT8,MBOAT2,TTC7B,AK3,PFKFB4,MPP1,ABCD1,PDK4,G6PD,MTMR3,PLA2G7,CMPK2,TGDS,HK3,BMX,DGKA,GSK3A,NDUFB1,LPGAT1,ISYNA1,PIK3C3,PAFAH1B1,PDE7A,GMPR2,TP53,NDUFA1,NDUFB4,AGPAT2,PIGS,PLSCR3,PRDX6,NDUFA2,NDUFB3,INPP5D,MTMR14,PNPLA8,LCAT,PDGFB,SGMS1,GNAI3,CAD,VAC14,FPGT,MECP2,PGAM4,NDUFB6,PLCG1,RHOQ,NANS,NUDT3,PLCG2,CLPX,UGP2,AK8,SERINC1,IMPDH1,PGLS,NPR2,…
GO:BP	defense response to other organism	GO:0098542	FALSE	7.606523452897987e-9	8.118813791351092	1263	6042	473	21026	IRAK3,KLRB1,SH2D1A,PYHIN1,KLRG1,IL7R,PTX3,DAO,ARG1,S100A12,LCN2,BPI,LTF,HP,CRISP3,TRGV9,C1RL,RNASE1,DEFA4,ELANE,TRGV5,CLEC4E,CLEC5A,XCL1,MPO,CLEC12B,LY9,MARCO,SRPK1,DDX17,CAMP,PGLYRP1,SIRPA,TLR2,FCRL3,SELP,AZU1,SLPI,CLU,CR1,RNASE3,IFI27,IRGM,TRDV2,SERPING1,SLAMF7,AQP1,PADI4,F2RL1,RNF135,NAIP,DDX60L,CD177,NDUFAF4,PF4V1,KLRC4,TMEM45B,CTSG,TRDV3,RNASE4,TREML1,TFEB,LAMP1,ACTR2,ACTR3,ZDHHC3,PPP6C,CDC4…
GO:BP	regulation of cell development	GO:0060284	FALSE	7.760210098744395e-9	8.11012652056009	847	6042	335	21026	GPR171,IKZF3,IL7R,VCAN,LTF,VEGFC,HAX1,CEBPA,SHTN1,PGLYRP1,RHOH,KIAA0319,EPHA4,TLR2,CYFIP1,FCRL3,MAPK14,CD83,CR1,INHBA,TBX21,S1PR3,SLC7A5,H4C3,TNFAIP6,GFI1B,MYC,CD101,GSK3A,HAPLN2,KLF13,CTDSP1,CD27,PAFAH1B1,TP53,NFKBID,RTN4,ARID1A,KDM4A,ROCK1,TCF7,INPP5D,PTPRC,RARG,MECP2,ZMIZ1,RHEB,GRN,RB1,VEGFA,NPR2,DYNLT1,TRAF6,TSPO,NFAM1,ZFP36L1,NFKBIA,MED1,ADAM8,HMGB2,ETS1,STAT5B,HDAC2,SERPINF1,ZFYVE27,CD46,RC…
GO:BP	Golgi vesicle transport	GO:0048193	FALSE	8.063735787558524e-9	8.093463710547015	312	6042	147	21026	STX17,KLHL20,SORT1,RAB13,WIPI1,SEC31B,LAMP1,COPB2,PPP6C,HYOU1,SEC13,RNF139,CUL3,COPB1,NAPG,VTI1A,KIF1C,RP2,AP1G2,EXOC6,RAB2A,CNIH4,KRT18,COG7,MYO5A,ARF4,SEC22B,ANK1,ARF5,PDCD6,RAB1A,CNIH,LRRK2,RAB10,KDELR2,BICD2,SEC23A,SPAST,MYO18A,GOLGA7,GGA2,VPS41,BET1L,SAR1A,VAMP3,SURF4,TRAPPC3,ARL8B,EXOC8,GABARAPL2,RAB34,AP3S1,SEC24C,NSF,VTI1B,TMED5,TMED2,SNX3,KLHL12,TRIP11,CORO7,COPZ1,RAB31,SCYL1,COPA,WHAMM,…
GO:BP	cellular component disassembly	GO:0022411	FALSE	8.13669762222239e-9	8.089551823053215	446	6042	196	21026	MMP8,IRAK3,STX17,IGF1R,ELAC1,PNPLA2,ASPH,ELANE,MMP9,EPHA4,MTRF1,IRGM,PLIN3,KIF21A,F2RL1,EIF5A2,DPP4,SH3BP1,DNAJC6,CTSG,MYC,PIK3C3,SPTAN1,PAFAH1B1,CAPZA1,ARID1A,KDM4A,KIF5B,APC,SHARPIN,HMGA1,TSG101,UBQLN1,TGFBR1,PHF23,CHMP2A,UPF1,ZMPSTE24,FSCN1,CHMP3,STMN3,SUPT16H,MID1IP1,MCTS1,SARM1,ADAM8,CHMP1B,PIK3CA,EIF4E2,MICAL3,FGFR4,MMP15,TRIP4,ATG12,VPS4B,SPAST,NMNAT1,CHMP7,PELO,CX3CR1,ACVR1C,SCAF4,ITGAM,A…
GO:BP	negative regulation of protein metabolic process	GO:0051248	FALSE	8.207655220440755e-9	8.085780895288423	677	6042	277	21026	IRAK3,ITM2A,TIMP2,PTX3,TTC36,GADD45A,TRIM71,TRIB2,SIRPA,EPHA4,CYFIP1,THBS1,ITGB3,HSP90AB1,IL1R2,MRPL13,CLU,CR1,CEP78,RPS7,G6PD,PSMF1,WAC,CTDSP1,CALM2,TP53,RNF139,RTN4,PPP1R15B,EIF4EBP2,APC,ROCK1,TNRC6A,PTPRC,TSG101,CD300A,USP38,RB1,MEN1,TSPO,MVP,HYAL2,SERPINB1,HDAC2,EIF4E2,NLRP7,CTDSP2,LYN,SNX6,CDKN1B,DAPK3,LRRK2,Q16594,SPOPL,USP4,C9ORF72,FRY,CSTA,DBI,PYCARD,HSPA1A,DNAJC3,RASSF2,CTNNB1,PAK2,FXR1,…
GO:BP	positive regulation of lymphocyte activation	GO:0051251	FALSE	8.599389994424156e-9	8.065532354739169	331	6042	154	21026	IL7R,HLA-DPB1,HSPH1,TNFSF13,XCL1,RHOH,SIRPA,FCRL3,IRS2,CD83,CR1,TBX21,DPP4,TNFSF12,CD27,CD3E,NFKBID,ARID1A,INPP5D,VAV3,PTPRC,ZMIZ1,BLOC1S3,TRAF6,EXOSC3,TNFRSF14,ADAM8,JAK2,FCHO1,PIK3CA,STAT5B,CD46,LYN,FOXO3,TYROBP,CD6,FADD,GPR183,CCDC88B,PYCARD,TLR9,CD5,EBI3,FCGR3A,B2M,IL10,LILRB4,BRD4,TLR4,CD28,FOXP3,SLC7A1,HLA-DRB5,HMGB1,EXOSC6,ZNF335,SMARCD3,DNAJA3,SYK,IL1B,MALT1,PTPN11,VAV1,PMS2,IL23R,PRKCZ,I…
GO:BP	response to lipid	GO:0033993	FALSE	1.955051979677649e-8	7.708841691369356	930	6042	361	21026	MMP8,IRAK3,RORA,MGST1,IGF1R,BPI,LTF,DEFA4,ELANE,TGFBR3,CES1,MPO,DDX17,MMP9,CAMP,SIRPA,TLR2,CYP1B1,TBXAS1,THBS1,MAPK14,SELP,SLPI,INHBA,IRGM,SLC7A5,TSHB,AQP1,PDK4,PF4V1,AKR1C3,CEBPE,ADM,FECH,CCR5,CMPK2,CTSG,GNB1,GSK3A,MBD2,YY1,SLC34A1,TADA3,ANKK1,SAFB2,PLSCR3,CASP3,MGST2,PTPRC,TRIM24,CAD,TGFBR1,RARG,MECP2,CDKN2D,ZMIZ1,TRIM41,AQP3,NCOA4,PLCG2,UPF1,PRPF8,F7,IFNAR1,TAB2,UCP2,TRAF6,TSPO,GDAP2,MAP4K1,ZF…
GO:BP	positive regulation of cellular component organization	GO:0051130	FALSE	1.965383821721662e-8	7.706552623213234	1105	6042	419	21026	PTX3,CCT2,IGF1R,EVL,CDK5R1,WIPI1,EGF,SKAP1,MMP9,SHTN1,NRG1,SIRPA,EPHA4,CYFIP1,MAPK14,AZU1,CENPJ,CLU,ABCA13,HIP1,SEMA4A,IRGM,SPHK1,F2RL1,EIF5A2,CD63,MYC,TOR1A,ACTR2,GSK3A,ACTR3,ARPC2,YY1,CDC42,BRK1,PAFAH1B1,ANAPC11,TP53,MAPRE1,RAD21,CUL3,APC,TMEM30A,MPP7,ROCK1,PXN,SH3GLB1,PDGFB,PTPRC,TSG101,TGFBR1,TERF2,MECP2,PTPN23,RHOQ,ATP7A,STYXL1,PLCG2,SSH1,DDHD2,CLIP3,GRN,FNIP1,FSCN1,RAP1B,RB1,VEGFA,NPR2,VASP…
GO:BP	regulation of cell differentiation	GO:0045595	FALSE	1.9702389486704203e-8	7.705481099830307	1576	6042	572	21026	MAFG,GPR171,IKZF3,IL7R,RORA,VCAN,LTF,VEGFC,BCL7A,CSRP3,HAX1,ALOX15B,CDK5R1,CEBPA,FGF9,SORT1,IQCB1,MAML1,TRIB2,DDX17,MMP9,SHTN1,PGLYRP1,RHOH,NRG1,TCF4,KIAA0319,S100B,EPHA4,PTGR3,TLR2,CYFIP1,FCRL3,MAPK14,CD83,ITGB3,HSP90AB1,MBOAT2,CR1,INHBA,TBX21,S1PR3,SLC7A5,H4C3,SOX6,NR1D2,G6PD,TNFAIP6,ADM,GFI1B,JDP2,MYC,CD101,GSK3A,HAPLN2,KLF13,CTDSP1,YY1,CD27,OLFM2,PAFAH1B1,VEZF1,TP53,MTA3,NFKBID,RTN4,ARID1A,LT…
GO:BP	system development	GO:0048731	FALSE	2.0076131197587256e-8	7.697319974864756	4053	6042	1341	21026	RETN,HK2,APCDD1,IRAK3,IL7R,RORA,KCNE1,PTX3,NDST1,FZD5,IGF1R,TTC36,VCAN,CRYGS,EVL,PTS,GADD45A,KCNA3,LTF,VEGFC,CSRP3,TNIK,EOMES,ABCD2,TRIM71,TNS2,ALOX15B,NDUFS4,PPP1R17,CDK5R1,CEBPA,FGF9,PLEKHA1,RAB13,TGFBR3,ABAT,KREMEN1,PRLH,GALNT11,MAML1,ATXN1L,TNFSF13,CLIC4,SH2B2,ITGA2B,EGF,KDM7A,PRKACB,MMP9,SHTN1,CAMP,RHOH,NRG1,TCF4,KIAA0319,S100B,EPHA4,TLR2,CYFIP1,CYP1B1,IRS2,SLC23A1,THBS1,B4GALT5,MAPK14,C12OR…
GO:BP	positive regulation of programmed cell death	GO:0043068	FALSE	2.057122865004548e-8	7.686739768587255	546	6042	230	21026	ARG1,GADD45A,CDK5R1,MMP9,CTSD,HTRA1,CYP1B1,THBS1,GZMA,CLU,INHBA,RPS7,F2RL1,AKR1C3,ADM,MYC,NACC2,TNFSF12,CDC42,CRADD,TP53,APC,PTRH2,CASP3,INPP5D,PTPRC,TGFBR1,RARG,PLCG1,STYXL1,MAP3K5,CLIP3,GRN,FNIP1,SIK1,HTATIP2,TSPO,HYAL2,ADAM8,LTK,NR3C1,JAK2,TRAF7,GADD45B,RRP1B,MAP2K4,LYN,APBB1,FOXO3,RET,DAPK3,LRRK2,FADD,BID,MAP3K9,LTA,RIPK1,HMOX1,CASP4,MYBBP1A,GADD45G,PYCARD,STK3,ARL6IP5,RASSF2,CTNNB1,PPP2R1A,P…
GO:BP	lymphocyte differentiation	GO:0030098	FALSE	2.3803750462754347e-8	7.623354611138585	442	6042	193	21026	GPR18,ITM2A,IKZF3,CD3G,IL7R,RORA,FZD5,EOMES,CD8A,CLEC4E,LY9,PGLYRP1,RHOH,FCRL3,CD83,CD3D,CR1,INHBA,TBX21,SEMA4A,MS4A1,STAT4,YY1,CD27,TP53,CD3E,NFKBID,ARID1A,TCF7,INPP5D,PTPRC,PREX1,ZMIZ1,SP3,TUSC2,ATP7A,NFIL3,PLCG2,FNIP1,MEN1,SLC25A5,RBPJ,ITK,NFAM1,ZFP36L1,ADAM8,STAT5B,CCR6,CD46,FOXO3,IRF4,CAMK4,FADD,GPR183,PTGER4,FOXJ1,HDAC4,TLR9,CTNNB1,B2M,KAT2A,IL10,LILRB4,BRD4,SYVN1,RABL3,CD28,ASCL2,TRAF3IP2,…
GO:BP	purine ribonucleotide metabolic process	GO:0009150	FALSE	2.501501636154648e-8	7.601799208721926	351	6042	160	21026	HK2,PFKFB2,TPST1,RORA,NME7,NDUFS4,HINT1,AK3,MPP1,HK3,NDUFB1,PDE7A,GMPR2,NDUFA1,NDUFB4,NDUFA2,NDUFB3,GNAI3,PGAM4,NDUFB6,RHOQ,NUDT3,CLPX,IMPDH1,NPR2,UCP2,TSPO,ND5,FBP1,ATP6V0C,ATP6,ATP5J,LRRK2,PFKFB1,HDAC4,HSPA1A,NMNAT1,SDHB,ENO3,BPGM,SLC25A25,SDHD,DNAJC30,IER3,NADK,PGM1,CBFA2T3,ND4,ABHD14B,PGK1,SULT1B1,SLC4A1,NDUFB5,ATP6V1A,NDUFA8,AK4,TMSB4X,TAZ,NDUFS6,NDUFC1,ENO2,APP,NT5E,SDHC,NDUFS2,IGF1,HPRT1,P…
GO:BP	regulation of proteolysis	GO:0030162	FALSE	2.5024253315824557e-8	7.6016388723163795	406	6042	180	21026	TIMP2,PYHIN1,XPO1,TTC36,CLEC3B,ASPH,CEBPA,EGF,TRIB2,PRKACB,EPHA4,THBS1,HSP90AB1,IL1R2,CLU,CR1,RPS7,PSMF1,GSK3A,WAC,HERPUD1,TP53,RNF139,ROCK1,UBE2K,PSMC1,UBQLN1,ZER1,USP38,GRN,ADAM8,TMX1,SERPINB1,SUMO1,HDAC2,RAD23B,TRAF7,NLRP7,LYN,FGFR4,LRRK2,Q16594,SPOPL,FADD,CSTA,NEDD8,HSPA1A,SEMG1,USP13,CAPN3,IL10,TANK,CYFIP2,PTEN,TMF1,FBXW11,DYX1C1,APH1B,LRIG2,F12,MBP,PSMB8,ATP13A2,GABARAPL2,CBFA2T3,IL1B,AGTPB…
GO:BP	vesicle organization	GO:0016050	FALSE	2.7551743426481792e-8	7.559850914541988	376	6042	169	21026	STX17,KCNE1,SPINK2,SORT1,SYP,SEC31B,SPHK1,AQP1,PPP6C,ATP6V1D,SEC13,PAFAH1B1,CUL3,VTI1A,PLEKHA3,VAV3,TSG101,PICALM,HGS,CHMP2A,VPS13B,ZDHHC20,ATP6AP1,SEC22B,BLOC1S3,CHMP3,HPS6,ATP6V1C1,RAB7A,CHMP1B,ATP6AP2,SNX10,PDCD6,TBPL1,ATP6V0C,RAB1A,LYST,VPS18,STX4,TBC1D4,VPS4B,SEC23A,MYO18A,CHMP7,VPS41,TMCC1,SAR1A,VAMP3,AP3M2,ZEB2,SURF4,RAB27A,TRAPPC3,ATP6V1E1,PRRT2,TMF1,ZFYVE16,TOM1,ARL8B,EXOC8,ATP13A2,RAB34…
GO:BP	primary metabolic process	GO:0044238	FALSE	2.8861768481260582e-8	7.5396770613879935	12342	6042	3762	21026	GZMK,MAFG,TDRD9,MMP8,GRB10,HK2,IRAK3,ITM2A,IKZF3,TIMP2,PFKFB2,PYHIN1,DCAF16,TPST1,ZNF134,IL7R,HPR,RPL9,RORA,PLOD2,KLHL20,FKBP5,PTX3,CCT2,ERAP2,NDST1,DAO,KLF12,TSHZ3,FZD5,PLBD1,IGF1R,XPO1,TTC36,ATF7IP2,CHIT1,ELAC1,CLEC3B,ARG1,S100A12,PNPLA2,PTS,HSPH1,GADD45A,ZNF141,PLTP,LTF,PRKAB2,BCL7A,CSRP3,HP,HAX1,TNIK,RNF144B,GAS5,ASPH,EOMES,RNF175,ABCD2,TRIM71,C1RL,TNS2,ALOX15B,NME7,NDUFS4,CDK5R1,ELANE,OTUD3,…
GO:BP	purine ribonucleotide biosynthetic process	GO:0009152	FALSE	3.0340450198718234e-8	7.517977979338065	161	6042	87	21026	NME7,NDUFS4,AK3,NDUFB1,NDUFA1,NDUFB4,NDUFA2,NDUFB3,NDUFB6,IMPDH1,NPR2,ND5,ATP6V0C,ATP6,ATP5J,SDHB,SDHD,DNAJC30,ND4,NDUFB5,ATP6V1A,NDUFA8,AK4,TMSB4X,TAZ,NDUFS6,NDUFC1,SDHC,NDUFS2,HPRT1,PINK1,NDUFB11,VCP,PRKAG2,PAICS,NDUFC2,IMPDH2,NPPA,NDUFB10,ND2,PPAT,NDUFV2,NDUFB7,ADCY2,NDUFA9,ATIC,GMPS,SDHA,NDUFS7,ENO1,PFAS,TGFB1,NDUFA12,PARP1,SLC25A13,ND4L,MTHFD1,NDUFA11,ATP5MF,APRT,NDUFS5,NDUFB2,ATP5ME,NME3,ND…
GO:BP	DNA metabolic process	GO:0006259	FALSE	3.054062375698531e-8	7.515122097225557	1005	6042	385	21026	IL7R,CCT2,IGF1R,GADD45A,BCL7A,TNFSF13,PRIM1,CYP1B1,HSP90AB1,GZMA,GEN1,TBX21,MORF4L2,ABRAXAS1,SPHK1,MYC,ACTR2,TRIP12,UBE2A,TAF12,CDK7,YY1,TNFSF12,CDC42,TADA3,TP53,RBMS1,RAD21,PPP4R2,ARID1A,TAOK3,UBE2D3,EXD2,MCMBP,HNRNPC,VCPIP1,EPC2,PDGFB,TRRAP,PTPRC,HMGA1,EP400,TERF2,TNFAIP1,CDKN2D,SENP3,UPF1,ZMPSTE24,MEN1,VEGFA,DACH1,SUPT16H,EXOSC3,SP100,UBE2W,NPAS2,ENY2,SUPT6H,HMGB2,ING3,TRIM28,TINF2,SUMO1,RAD23…
GO:BP	nucleoside phosphate metabolic process	GO:0006753	FALSE	3.09093570505525e-8	7.509910028657217	646	6042	264	21026	HK2,PFKFB2,TPST1,RORA,NME7,NDUFS4,HINT1,FUT8,AK3,MPP1,ABCD1,PDK4,G6PD,CMPK2,TGDS,HK3,GSK3A,NDUFB1,PDE7A,GMPR2,TP53,NDUFA1,NDUFB4,NDUFA2,NDUFB3,GNAI3,CAD,FPGT,PGAM4,NDUFB6,RHOQ,NANS,NUDT3,CLPX,UGP2,AK8,IMPDH1,PGLS,NPR2,UCP2,TSPO,UGGT1,SARM1,ND5,FBP1,TBPL1,ATP6V0C,ATP6,ATP5J,NEIL2,LRRK2,PFKFB1,GPD2,HDAC4,NEIL1,PGD,HSPA1A,NMNAT1,FAR1,TKT,SDHB,DERA,DPM1,ENTPD2,OGG1,ENO3,BPGM,SLC25A25,UXS1,SDHD,TYMP,T…
GO:BP	autophagosome organization	GO:1905037	FALSE	3.196890980664152e-8	7.49527217364488	125	6042	72	21026	STX17,WIPI1,CTSD,IRGM,MTMR3,PIK3C3,SH3GLB1,UBQLN1,PHF23,SEC22B,TRAF6,RAB7A,RAB1A,LRRK2,C9ORF72,ATG12,SNX18,UBXN2B,PIP4K2C,EHMT2,RALB,LRSAM1,TOM1,RAB5A,ATG9B,ULK3,ATP13A2,GABARAPL2,SNX30,RB1CC1,RAB3GAP2,ATG5,WIPI2,PIK3C2B,RAB43,ATG3,IFT20,PINK1,ATG7,MAP1LC3B,TCIRG1,FEZ2,DNAJC16,LRBA,STX12,ATM,GABARAPL1,SCFD1,UBQLN2,GABARAP,ARFIP2,ATG4D,MFN2,MOAP1,EPHB2,WDR45,MAP1LC3A,ATG16L2,EFNB1,GBA,ATG4B,MTM1,R…
GO:BP	mitochondrion organization	GO:0007005	FALSE	3.336510471446878e-8	7.476707507802732	435	6042	190	21026	HK2,NDUFS4,CEBPA,THEM4,PPM1K,MMP9,CLU,NDUFAF4,GSK3A,NDUFB1,NAIF1,TP53,NDUFA1,PLEC,TIMM8B,NDUFB4,SURF1,PLSCR3,NDUFA2,COX7A2,TMEM11,NDUFB3,EPAS1,SHARPIN,UQCRFS1,NDUFB6,ATP7A,DDHD2,SLC25A5,UCP2,NDUFAF1,ND5,JTB,SLIRP,LRRK2,MFF,PLD6,CNTNAP1,BID,ROMO1,PYCARD,HSPA1A,YME1L1,PMAIP1,MARCKS,TYMP,TIMM22,ATP13A2,IER3,DNAJA3,AGTPBP1,ND4,DNAJC11,NDUFB5,PUM2,HDAC6,NDUFA8,HUWE1,TAZ,MEF2A,GDAP1,NDUFC1,RHOT1,HIGD1A…
GO:BP	activation of immune response	GO:0002253	FALSE	3.540811122392929e-8	7.450897239209212	560	6042	234	21026	IRAK3,SH2D1A,PYHIN1,CD3G,HLA-DPB1,LTF,C1RL,PLEKHA1,CD8A,CLEC4E,SH2B2,SKAP1,BTN3A2,TLR2,FCRL3,CLU,CD3D,CR1,C3AR1,IRGM,SERPING1,F2RL1,RNF135,NAIP,MS4A1,KLRC4,CD8B,BMX,ZDHHC3,PPP6C,UFD1L,CD3E,CHUK,NFKBID,RTN4,INPP5D,VAV3,PTPRC,MFHAS1,UBQLN1,UBASH3A,CD300A,BTN2A1,PLCG1,PLCG2,ITK,TRAF6,NFAM1,FGR,NFKBIA,SARM1,RIOK3,TLR8,FCHO1,PIK3CA,TAX1BP1,C4BPA,CD46,LYN,TYROBP,IRF3,IRF4,PYCARD,HSPA1A,CMTM3,XIAP,TLR9,…
GO:BP	purine nucleotide metabolic process	GO:0006163	FALSE	3.852760272060883e-8	7.414228012985472	430	6042	188	21026	HK2,PFKFB2,TPST1,RORA,NME7,NDUFS4,HINT1,AK3,MPP1,G6PD,HK3,NDUFB1,PDE7A,GMPR2,TP53,NDUFA1,NDUFB4,NDUFA2,NDUFB3,GNAI3,PGAM4,NDUFB6,RHOQ,NUDT3,CLPX,IMPDH1,PGLS,NPR2,UCP2,TSPO,SARM1,ND5,FBP1,ATP6V0C,ATP6,ATP5J,LRRK2,PFKFB1,GPD2,HDAC4,PGD,HSPA1A,NMNAT1,TKT,SDHB,DERA,ENO3,BPGM,SLC25A25,SDHD,TALDO1,DNAJC30,IER3,NADK,PGM1,CBFA2T3,ND4,ABHD14B,PGK1,SULT1B1,SLC4A1,NDUFB5,ATP6V1A,TP53I3,NDUFA8,AK4,TMSB4X,TAZ…
GO:BP	membraneless organelle assembly	GO:0140694	FALSE	3.852760272060883e-8	7.414228012985472	430	6042	188	21026	CSRP3,TUBGCP5,RPLP0,PGM5,MYL9,TNNT1,RPF2,CENPJ,RPS27L,ABRAXAS1,CDCA8,ERAL1,PLEC,MAPRE1,CSDE1,AAAS,HDAC3,KPNB1,TNRC6A,YTHDF3,NEB,KIFC2,DAZAP2,CHMP2A,STYXL1,FSCN1,LZTS2,CHMP3,LSM14B,CHMP1B,NUMA1,OBSCN,KNTC1,TRAF7,MOSPD2,CENPW,C9ORF72,TTN,CNTROB,HSPA1A,VPS4B,TUBGCP4,CHMP7,KAT2A,METTL17,TNKS,FXR1,CAPN3,LSM3,PPAN,NOP2,EML3,PTEN,ATXN2,MDN1,PAN2,RPL10L,OGFOD1,MYBL2,LSM14A,PRKAR1A,ATG5,CEP63,PLK1,PUM2,CN…
GO:BP	regulation of macromolecule biosynthetic process	GO:0010556	FALSE	4.230028422675035e-8	7.37365671447615	5644	6042	1816	21026	MAFG,GPR18,TDRD9,MMP8,GRB10,IRAK3,ITM2A,IKZF3,PYHIN1,ZNF134,IL7R,RORA,CCT2,KLF12,TSHZ3,FZD5,ATF7IP2,CLEC3B,HLA-DPB1,ARG1,S100A12,BPI,HSPH1,GADD45A,ZNF141,LTF,BCL7A,CSRP3,HAX1,ASPH,EOMES,ABCD2,TRIM71,MIS18A,ALOX15B,CDK5R1,ELANE,CEBPA,FGF9,GPR174,SORT1,TGFBR3,ADORA3,ZNF527,MAML1,ZNF22,ATXN1L,ORM2,CLEC4E,TNFSF13,CLEC5A,XCL1,ABCC2,EGF,TRIB2,KDM7A,PRKACB,LY9,HINT1,SRPK1,DDX17,SKAP1,PGLYRP1,RHOH,FUT8,N…
GO:BP	DNA damage response	GO:0006974	FALSE	4.3519858403775725e-8	7.361312526328233	908	6042	352	21026	GADD45A,BCL7A,MAPK14,GEN1,RPS27L,CLU,MORF4L2,ABRAXAS1,NUAK1,MYC,ACTR2,TRIP12,UBE2A,WAC,TAF12,CDK7,NACC2,YY1,CBX3,TADA3,CRADD,TP53,RAD21,PPP4R2,ARID1A,CBX5,HDAC3,APC,TAOK3,CASP3,UBE2D3,EXD2,VCPIP1,EPC2,VAV3,TRRAP,HMGA1,PPM1D,EP400,TERF2,CDKN2D,SENP3,BRAT1,UPF1,ZMPSTE24,MEN1,CBX1,SUPT16H,TRAF6,MCTS1,SP100,UBE2W,NPAS2,ENY2,HMGB2,SYF2,ING3,TRIM28,SUMO1,RAD23B,NEIL2,XRCC4,LYN,APBB1,FOXO3,IRF3,DYRK1A,Q…
GO:BP	immune response-activating cell surface receptor signaling pathway	GO:0002429	FALSE	4.935275417630444e-8	7.306688606110956	310	6042	144	21026	SH2D1A,CD3G,HLA-DPB1,LTF,PLEKHA1,CD8A,SH2B2,SKAP1,BTN3A2,TLR2,FCRL3,CD3D,CR1,C3AR1,F2RL1,MS4A1,KLRC4,CD8B,BMX,CD3E,CHUK,NFKBID,INPP5D,VAV3,PTPRC,MFHAS1,UBASH3A,CD300A,BTN2A1,PLCG1,PLCG2,ITK,TRAF6,NFAM1,FGR,NFKBIA,FCHO1,PIK3CA,TAX1BP1,LYN,TYROBP,IRF3,CMTM3,PAK2,PLA2G6,LIME1,ITGAM,LILRB4,TLR4,NINJ1,PAK1,CD28,NR1D1,NMI,PLCL2,TRAT1,TLR1,FOSL2,CYBA,FOXP3,SLA2,SYK,CD79B,CD22,MALT1,BLK,LY96,VAV1,MAPK1,S…
GO:BP	positive regulation of cytokine production	GO:0001819	FALSE	6.129561212124033e-8	7.212570613568678	494	6042	210	21026	MMP8,IRAK3,RORA,FZD5,HLA-DPB1,ALOX15B,ELANE,ORM2,CLEC4E,CLEC5A,XCL1,LY9,BTN3A2,TLR2,CYP1B1,THBS1,TIGIT,MAPK14,CD83,AZU1,CLU,TBX21,C3AR1,IL1R1,HPSE,SLC7A5,SPHK1,F2RL1,RNF135,NAIP,CD3E,RAD21,CHUK,AGPAT2,RTN4,PTPRC,TUSC2,CD58,MAPK11,ZNF580,PLCG2,ITK,SULF2,TRAF6,NFAM1,TNFRSF14,FGR,HYAL2,ADAM8,ATP6AP2,HMGB2,RIOK3,JAK2,RAB1A,TLR8,STAT5B,HDAC2,CD46,TYROBP,PIK3CG,LRRK2,IRF3,PYDC1,IRF4,CD6,FADD,PTGER4,LTA…
GO:BP	ribose phosphate metabolic process	GO:0019693	FALSE	7.836067698268274e-8	7.105901820653648	380	6042	169	21026	HK2,PFKFB2,TPST1,RORA,NME7,NDUFS4,HINT1,AK3,MPP1,G6PD,HK3,NDUFB1,PDE7A,GMPR2,NDUFA1,NDUFB4,NDUFA2,NDUFB3,GNAI3,CAD,PGAM4,NDUFB6,RHOQ,NUDT3,CLPX,IMPDH1,NPR2,UCP2,TSPO,ND5,FBP1,ATP6V0C,ATP6,ATP5J,LRRK2,PFKFB1,HDAC4,HSPA1A,NMNAT1,SDHB,ENO3,BPGM,SLC25A25,SDHD,DNAJC30,IER3,NADK,PGM1,CBFA2T3,ND4,ABHD14B,PGK1,SULT1B1,SLC4A1,NDUFB5,ATP6V1A,NDUFA8,AK4,TMSB4X,TAZ,NDUFS6,NDUFC1,DPYD,ENO2,APP,NT5E,SDHC,NDUFS…
GO:BP	innate immune response	GO:0045087	FALSE	7.840835052963875e-8	7.105637682266845	984	6042	376	21026	IRAK3,KLRB1,SH2D1A,PYHIN1,KLRG1,PTX3,ARG1,S100A12,LCN2,BPI,LTF,CRISP3,TRGV9,C1RL,DEFA4,TRGV5,CLEC4E,CLEC5A,CLEC12B,LY9,MARCO,SRPK1,CAMP,PGLYRP1,SIRPA,TLR2,FCRL3,SLPI,CLU,CR1,RNASE3,IFI27,IRGM,TRDV2,SERPING1,SLAMF7,PADI4,F2RL1,RNF135,NAIP,CD177,KLRC4,TMEM45B,TRDV3,TREML1,TFEB,LAMP1,ACTR2,ACTR3,ZDHHC3,PPP6C,CDC42,UFD1L,TP53,CHUK,RTN4,KIF5B,UBE2K,YTHDF3,STXBP3,TOLLIP,MFHAS1,UBQLN1,CD58,TRIM41,CD300A…
GO:BP	intrinsic apoptotic signaling pathway	GO:0097193	FALSE	8.81994829332166e-8	7.054533960898895	312	6042	144	21026	HINT1,MMP9,CYP1B1,RPS27L,CLU,RPS7,GRINA,MYC,HERPUD1,NACC2,HYOU1,TP53,CUL3,TMBIM6,CASP3,SGMS1,UBQLN1,CDKN2D,STYXL1,PDCD10,MAP3K5,JAK2,MAP2K4,LRRK2,Q16594,BID,HIPK1,PTTG1IP,CASP4,MYBBP1A,PYCARD,HSPA1A,ARL6IP5,ING2,CTNNB1,CD44,IL10,PMAIP1,SYVN1,TNFRSF10B,SERINC3,SNW1,CEBPB,IER3,SHISA5,RRN3,RTKN2,PPP1R13B,GPX1,AEN,TXNDC12,TAF9B,HNRNPK,PPM1F,PINK1,TRAP1,PYCR1,PDK1,CDKN1A,ARMC10,USP15,ZNF622,BCL2A1,PAR…
GO:BP	defense response to symbiont	GO:0140546	FALSE	8.999496134186613e-8	7.045781805257131	1082	6042	408	21026	IRAK3,KLRB1,SH2D1A,PYHIN1,KLRG1,PTX3,DAO,ARG1,S100A12,LCN2,BPI,LTF,CRISP3,TRGV9,C1RL,DEFA4,ELANE,TRGV5,CLEC4E,CLEC5A,XCL1,CLEC12B,LY9,MARCO,SRPK1,CAMP,PGLYRP1,SIRPA,TLR2,FCRL3,AZU1,SLPI,CLU,CR1,RNASE3,IFI27,IRGM,TRDV2,SERPING1,SLAMF7,PADI4,F2RL1,RNF135,NAIP,CD177,PF4V1,KLRC4,TMEM45B,CTSG,TRDV3,RNASE4,TREML1,TFEB,LAMP1,ACTR2,ACTR3,ZDHHC3,PPP6C,CDC42,UFD1L,TP53,CHUK,RTN4,KIF5B,UBE2K,YTHDF3,STXBP3,T…
GO:BP	nucleobase-containing small molecule metabolic process	GO:0055086	FALSE	1.0744451421367844e-7	6.968815753346549	673	6042	271	21026	HK2,PFKFB2,TPST1,RORA,NME7,NDUFS4,HINT1,FUT8,AK3,MPP1,ABCD1,PDK4,G6PD,CMPK2,TGDS,HK3,GSK3A,NDUFB1,PDE7A,GMPR2,TP53,NDUFA1,NDUFB4,NDUFA2,NDUFB3,PGM2,GNAI3,CAD,FPGT,PGAM4,NDUFB6,RHOQ,NANS,NUDT3,CLPX,UGP2,AK8,IMPDH1,PGLS,NPR2,UCP2,TSPO,UGGT1,SARM1,ND5,FBP1,TBPL1,ATP6V0C,ATP6,ATP5J,NEIL2,LRRK2,PFKFB1,GPD2,HDAC4,NEIL1,PGD,HSPA1A,NMNAT1,FAR1,TKT,SDHB,DERA,GLRX,DPM1,ENTPD2,OGG1,ENO3,BPGM,SLC25A25,UXS1,S…
GO:BP	myeloid cell differentiation	GO:0030099	FALSE	1.1484417831316626e-7	6.939891015188582	443	6042	191	21026	GPR171,LTF,HAX1,CEBPA,CLEC1B,TGFBR3,CLEC5A,MMP9,ALAS2,TLR2,MAPK14,GP1BA,INHBA,H4C3,GAB2,F2RL1,OSCAR,G6PD,CEBPE,TNFAIP6,FECH,GP1BB,SLC25A40,MYC,CD101,KLF13,CDC42,FLI1,PAFAH1B1,CASP3,EPAS1,INPP5D,KCNQ1,MFHAS1,RARG,SP3,KLF2,OSTM1,ATP6AP1,RB1,VEGFA,SLC25A5,RBPJ,UCP2,TRAF6,ZFP36L1,NFKBIA,MED1,SNX10,HMGB2,ETS1,NR3C1,JAK2,TPM4,STAT5B,RCOR1,LYN,FOXO3,TYROBP,PTBP3,IRF4,CAMK4,FADD,GPR183,SH3PXD2A,RIPK1,HCL…
GO:BP	response to abiotic stimulus	GO:0009628	FALSE	1.5770821610464585e-7	6.802145680697968	1144	6042	427	21026	RETN,HK2,RORA,PLOD2,KCNE1,IGF1R,TTC36,GADD45A,VEGFC,CSRP3,ELANE,TRPM2,TGFBR3,ABAT,AGTRAP,MPO,MMP9,ALAS2,KIAA0319,EPHA4,TLR2,CYFIP1,THBS1,MAPK14,ITGB3,HSP90AB1,NMT2,INHBA,ABRAXAS1,SLC7A5,AQP1,DPP4,PTPRK,ADM,FECH,MYC,RYR1,BNIP2,UBE2A,MBD2,YY1,HYOU1,CRADD,TP53,PLEC,MMP24,RAD21,RTN4,TMBIM6,CASP3,EPAS1,SLU7,ROM1,KCNQ1,PTPRC,PPM1D,UBQLN1,DNAJA2,MECP2,CDKN2D,RDH13,AQP3,MAPK11,BRAT1,ATP7A,ZMPSTE24,DDHD2,…
GO:BP	response to nitrogen compound	GO:1901698	FALSE	1.6154989769056556e-7	6.791693312684634	1080	6042	406	21026	RETN,MTARC1,GRB10,IRAK3,FKBP5,KCNE1,IGF1R,CSRP3,ASPH,RNF175,TNS2,NDUFS4,CDK5R1,SORT1,TRPM2,RAB13,TGFBR3,ABAT,PRLH,NSG1,AGTRAP,RRAGD,CES1,SH2B2,MMP9,CTSD,CAMP,EPHA4,TLR2,CYFIP1,CYP1B1,IRS2,MAPK14,ITGB3,ECHDC3,INHBA,SLC7A5,AQP1,PDK4,ADM,STAT4,RYR1,TOR1A,GNB1,GSK3A,HERPUD1,SLC34A1,UFD1L,DIAPH1,TP53,CHUK,RNF139,CUL3,FBXO44,GNAI2,EIF4EBP2,APC,TMBIM6,ROCK1,PXN,CASP3,GSTM2,STXBP3,EDEM1,ITGB2,KCNQ1,TRIM2…
GO:BP	regulation of B cell activation	GO:0050864	FALSE	1.616741188253193e-7	6.791359497415603	133	6042	74	21026	IKZF3,TNFSF13,FCRL3,IRS2,CR1,INHBA,TBX21,TNFSF12,CD27,CASP3,INPP5D,VAV3,PTPRC,CD300A,EXOSC3,NFAM1,ZFP36L1,SUPT6H,STAT5B,LYN,TYROBP,GPR183,FOXJ1,MZB1,TLR9,IL10,TLR4,CD28,FOXP3,EXOSC6,SYK,TNFRSF13B,CD22,PMS2,TBC1D10C,MNDA,BTK,SH3KBP1,CARD11,CDKN1A,SLC39A10,CD19,ZFP36L2,PPP2R3C,ATM,TNFRSF13C,TNFRSF4,BCL6,PELI1,CD320,ATAD5,BANK1,SLC15A4,CLCF1,INHA,EPHB2,TICAM1,PKN1,NCKAP1L,IL27RA,TGFB1,PTPN6,CD81,IL2…
GO:BP	anatomical structure morphogenesis	GO:0009653	FALSE	1.6788456263672713e-7	6.774989236380805	2713	6042	923	21026	MMP8,HK2,APCDD1,IL7R,RORA,NDST1,FZD5,IGF1R,CRYGS,SPINK2,EVL,GADD45A,ZNF141,LTF,VEGFC,CSRP3,TNIK,ASPH,EOMES,TRIM71,CDK5R1,CLEC1B,FGF9,PGM5,PLEKHA1,TGFBR3,ZNF22,CLIC4,ITGA2B,EGF,FGD4,PRKACB,MYL9,TNNT1,MMP9,SHTN1,CAMP,RHOH,NRG1,KIAA0319,S100B,EPHA4,TLR2,CYFIP1,CYP1B1,THBS1,DUSP5,B4GALT5,MAPK14,C12ORF57,ITGB3,GP1BA,HECW2,CLU,INHBA,S1PR3,C3AR1,SEMA4A,HPSE,SPHK1,KIF21A,VSIG1,TSHB,SOX6,AQP1,RPS7,FOXQ1,I…
GO:BP	ribonucleotide metabolic process	GO:0009259	FALSE	1.7213218460339454e-7	6.7641379193944795	372	6042	165	21026	HK2,PFKFB2,TPST1,RORA,NME7,NDUFS4,HINT1,AK3,MPP1,HK3,NDUFB1,PDE7A,GMPR2,NDUFA1,NDUFB4,NDUFA2,NDUFB3,GNAI3,CAD,PGAM4,NDUFB6,RHOQ,NUDT3,CLPX,IMPDH1,NPR2,UCP2,TSPO,ND5,FBP1,ATP6V0C,ATP6,ATP5J,LRRK2,PFKFB1,HDAC4,HSPA1A,NMNAT1,SDHB,ENO3,BPGM,SLC25A25,SDHD,DNAJC30,IER3,NADK,PGM1,CBFA2T3,ND4,ABHD14B,PGK1,SULT1B1,SLC4A1,NDUFB5,ATP6V1A,NDUFA8,AK4,TMSB4X,TAZ,NDUFS6,NDUFC1,DPYD,ENO2,APP,NT5E,SDHC,NDUFS2,IGF…
GO:BP	ribose phosphate biosynthetic process	GO:0046390	FALSE	1.989531209930977e-7	6.701249243652808	183	6042	94	21026	NME7,NDUFS4,AK3,G6PD,NDUFB1,NDUFA1,NDUFB4,NDUFA2,NDUFB3,CAD,NDUFB6,IMPDH1,NPR2,ND5,ATP6V0C,ATP6,ATP5J,SDHB,SDHD,DNAJC30,ND4,NDUFB5,ATP6V1A,NDUFA8,AK4,TMSB4X,TAZ,NDUFS6,NDUFC1,SDHC,NDUFS2,HPRT1,PINK1,NDUFB11,PYGL,VCP,PRKAG2,PAICS,NDUFC2,IMPDH2,NPPA,NDUFB10,ND2,PPAT,NDUFV2,NDUFB7,ADCY2,NDUFA9,ATIC,GMPS,UPRT,SDHA,NDUFS7,ENO1,PFAS,TGFB1,NDUFA12,PARP1,UPP1,UMPS,SLC25A13,ND4L,MTHFD1,NDUFA11,PRPS1,ATP5M…
GO:BP	ribonucleotide biosynthetic process	GO:0009260	FALSE	2.5068590505332866e-7	6.600870083790675	176	6042	91	21026	NME7,NDUFS4,AK3,NDUFB1,NDUFA1,NDUFB4,NDUFA2,NDUFB3,CAD,NDUFB6,IMPDH1,NPR2,ND5,ATP6V0C,ATP6,ATP5J,SDHB,SDHD,DNAJC30,ND4,NDUFB5,ATP6V1A,NDUFA8,AK4,TMSB4X,TAZ,NDUFS6,NDUFC1,SDHC,NDUFS2,HPRT1,PINK1,NDUFB11,VCP,PRKAG2,PAICS,NDUFC2,IMPDH2,NPPA,NDUFB10,ND2,PPAT,NDUFV2,NDUFB7,ADCY2,NDUFA9,ATIC,GMPS,UPRT,SDHA,NDUFS7,ENO1,PFAS,TGFB1,NDUFA12,PARP1,UPP1,UMPS,SLC25A13,ND4L,MTHFD1,NDUFA11,ATP5MF,APRT,NDUFS5,ND…
GO:BP	canonical NF-kappaB signal transduction	GO:0007249	FALSE	2.857583016147705e-7	6.544001143983895	308	6042	141	21026	RORA,S100A12,LTF,TGFBR3,RHOH,SIRPA,S100B,TLR2,IRGM,F2RL1,CHUK,MIER1,MAP3K3,ROCK1,SHARPIN,PLCG2,TAB2,VEGFA,TRAF6,PPM1B,NFKBIA,ADAM8,RIOK3,TLR8,ZFAND6,S100A4,IRF3,PYDC1,TRAF4,FADD,CARD16,RIPK1,HMOX1,PYCARD,XIAP,TLR9,RASSF2,LIME1,CX3CR1,NFKB2,CAPN3,LILRB4,TANK,BRD4,TNFRSF19,NR1H4,TLR4,NR1D1,FBXW11,TRAF3IP2,TNFRSF10B,USP20,TRIM25,TRIM8,DNAJA3,NLRX1,IL1B,SHISA5,MALT1,MTDH,TMSB4X,GSTP1,NEK6,RELB,TMEM9B…
GO:BP	mononuclear cell proliferation	GO:0032943	FALSE	2.938687173734803e-7	6.531846642560141	319	6042	145	21026	IKZF3,IL7R,HLA-DPB1,ARG1,XCL1,FCRL3,IRS2,CR1,MS4A1,ELF4,TP53,PSMB10,CD3E,CASP3,INPP5D,VAV3,PTPRC,CD300A,TRAF6,TNFRSF14,JAK2,STAT5B,CD46,LYN,TYROBP,PIK3CG,CD6,FADD,BID,GPR183,FOXJ1,MZB1,CCDC88B,PYCARD,TLR9,CTNNB1,EBI3,FCGR3A,IL10,LILRB4,TLR4,CD28,PLCL2,FOSL2,FOXP3,SLC7A1,CEBPB,HMGB1,ZNF335,DNAJA3,SYK,PRKAR1A,TNFRSF13B,IL1B,CD22,MALT1,CD151,IL23R,SOS2,IGF1,MNDA,CNN2,BTK,HPRT1,ANXA1,CARD11,SLC4A2,TB…
GO:BP	lymphocyte proliferation	GO:0046651	FALSE	3.089288247991988e-7	6.510141567686912	311	6042	142	21026	IKZF3,IL7R,HLA-DPB1,ARG1,XCL1,FCRL3,IRS2,CR1,MS4A1,ELF4,TP53,PSMB10,CD3E,CASP3,INPP5D,VAV3,PTPRC,CD300A,TRAF6,TNFRSF14,JAK2,STAT5B,CD46,LYN,TYROBP,PIK3CG,CD6,FADD,BID,GPR183,FOXJ1,MZB1,CCDC88B,PYCARD,TLR9,CTNNB1,EBI3,FCGR3A,IL10,LILRB4,TLR4,CD28,PLCL2,FOSL2,FOXP3,SLC7A1,CEBPB,HMGB1,ZNF335,DNAJA3,SYK,PRKAR1A,TNFRSF13B,IL1B,CD22,MALT1,CD151,IL23R,SOS2,IGF1,MNDA,BTK,HPRT1,ANXA1,CARD11,SLC4A2,CDKN1A,…
GO:BP	organelle assembly	GO:0070925	FALSE	3.594463750532588e-7	6.4443658918056945	1046	6042	393	21026	STX17,TTC36,SPINK2,CSRP3,TUBGCP5,RPLP0,PGM5,WIPI1,GALNT11,IQCB1,RSPH9,IFT56,MYL9,TNNT1,RPF2,CTSD,CENPJ,RPS27L,ABRAXAS1,IRGM,LRFN1,MPHOSPH9,NTNG2,MTMR3,CDCA8,ACTR2,ACTR3,DNHD1,DUSP23,ATP6V1D,PIK3C3,ERAL1,PAFAH1B1,PLEC,MAPRE1,CSDE1,AAAS,HDAC3,KPNB1,TNRC6A,YTHDF3,RP2,SH3GLB1,NEB,KCNQ1,KIFC2,TSG101,UBQLN1,PHF23,DAZAP2,RILPL2,HGS,PTPN23,CHMP2A,STYXL1,VPS13B,FSCN1,ARF4,SEC22B,CDC14A,LZTS2,CHMP3,LSM14B,…
GO:BP	autophagosome assembly	GO:0000045	FALSE	3.838549982844498e-7	6.415832799949089	118	6042	67	21026	STX17,WIPI1,CTSD,IRGM,MTMR3,PIK3C3,SH3GLB1,UBQLN1,PHF23,SEC22B,TRAF6,RAB7A,RAB1A,LRRK2,C9ORF72,ATG12,SNX18,UBXN2B,PIP4K2C,EHMT2,RALB,LRSAM1,TOM1,RAB5A,ATG9B,ULK3,GABARAPL2,SNX30,RB1CC1,RAB3GAP2,ATG5,WIPI2,RAB43,ATG3,IFT20,PINK1,ATG7,MAP1LC3B,TCIRG1,FEZ2,LRBA,STX12,ATM,GABARAPL1,SCFD1,UBQLN2,GABARAP,ARFIP2,ATG4D,MFN2,MOAP1,EPHB2,WDR45,MAP1LC3A,ATG16L2,EFNB1,ATG4B,MTM1,RUFY4,TRIM32,CHEK2,ATP2A2,ATG…
GO:BP	cell activation involved in immune response	GO:0002263	FALSE	3.86285601442212e-7	6.4130914796127145	320	6042	145	21026	ITM2A,RORA,FCER1A,EOMES,CD1C,CLEC4E,TNFSF13,LY9,PGLYRP1,CR1,TBX21,SEMA4A,SUCNR1,GAB2,F2RL1,CD177,STAT4,LAMP1,TNFSF12,TP53,NFKBID,STXBP3,ITGB2,PTPRC,CD300A,ATP7A,PLCG2,GRN,MEN1,EXOSC3,FGR,SUPT6H,CCR6,CD46,LYN,TYROBP,PIK3CG,IRF4,STX4,GPR183,PTGER4,PYCARD,FCGR3A,CX3CR1,ITGAM,IL10,BRD4,TLR4,RAB27A,CD28,ASCL2,NMI,APBB1IP,PLCL2,FOXP3,HMGB1,EXOSC6,SYK,PLXNA1,MALT1,PMS2,FES,IL23R,LCP1,RELB,LFNG,CLEC4D,AP…
GO:BP	regulation of phosphorus metabolic process	GO:0051174	FALSE	4.963440700358259e-7	6.304217162393518	957	6042	363	21026	GRB10,IRAK3,TTC36,S100A12,GADD45A,LTF,HAX1,TNIK,NDUFS4,PPP1R17,CDK5R1,ELANE,FGF9,EGF,TRIB2,MMP9,NRG1,SIRPA,EPHA4,IRS2,THBS1,ITGB3,PPP1R26,INHBA,IRGM,SPHK1,PDK4,MTMR3,FECH,GSK3A,CTDSP1,CALM2,TADA3,TP53,CD3E,SERTAD1,PPP1R15B,HDAC3,APC,ROCK1,UBE2K,TAOK3,PRKAR1B,PDGFB,ITGB2,PTPRC,SPDYE2,TSG101,CDKN2D,HGS,CD300A,BRAT1,PLCG2,WDFY2,PDCD10,MAP3K5,CLIP3,TAB2,FNIP1,RB1,MIDN,MEN1,VEGFA,SLCO3A1,TRAF6,TSPO,TN…
GO:BP	post-translational protein modification	GO:0043687	FALSE	5.008455045468619e-7	6.300296219981699	1027	6042	386	21026	DCAF16,TPST1,KLHL20,TTC36,RNF144B,TRIM71,OTUD3,HINT1,ANKRD9,HSP90AB1,HECW2,IFI27,ABRAXAS1,IRGM,SPHK1,CEP78,PADI4,RPS7,SIAH2,RNF135,MED21,TOR1A,COPS7B,TRIP12,GSK3A,UBE2A,HERPUD1,ANAPC11,RNF139,CUL3,LMO7,USP39,HDAC3,RNF181,UBE2K,EPAS1,UBE2D3,KCTD21,FBXL5,SHARPIN,VCPIP1,USP33,TRIM33,TRIM24,TOLLIP,UBQLN1,USP21,TGFBR1,PHF23,TNFAIP1,ZMIZ1,SENP3,TRIM41,RNF13,USP38,UBE2R2,TRAF6,TSPO,MED1,UBE2W,RNF130,FBX…
GO:BP	supramolecular fiber organization	GO:0097435	FALSE	5.499376764555769e-7	6.259686525605928	861	6042	331	21026	EVL,CSRP3,HAX1,PSTPIP2,TUBGCP5,NME7,CDK5R1,PGM5,MYL9,TNNT1,SHTN1,CAMP,RHOH,CYFIP1,CYP1B1,HSP90AB1,CENPJ,CLU,HIP1,KIF21A,F2RL1,SIAH2,ITGB5,SH3BP1,TNFAIP6,ACTR2,ACTR3,ARPC2,ARPC3,CDC42,MARCKSL1,SPTAN1,BRK1,PAFAH1B1,DIAPH1,PLEC,MAPRE1,CAPZA1,CUL3,APC,KPNB1,ROCK1,PXN,NEB,TGFBR1,MECP2,PREX1,TNFAIP1,ARPC5,TUBG2,EPPK1,RHOQ,ATP7A,SSH1,MYO5A,CLIP3,FSCN1,RB1,STMN3,ARFGEF1,MID1IP1,VASP,CLIP1,IQGAP1,ABI2,NUM…
GO:BP	multicellular organismal-level homeostasis	GO:0048871	FALSE	5.544694737317467e-7	6.256122358901279	825	6042	319	21026	GRB10,IL7R,IGF1R,LCN2,PRKAB2,TNS2,CEBPA,GPR174,TRPM2,TGFBR3,ABAT,OCIAD2,PRLH,IQCB1,CYBRD1,SH2B2,PRKACB,ALAS2,PIWIL4,MAPK14,ITGB3,INHBA,SUCNR1,VSIG1,AQP1,NR1D2,OSCAR,PDK4,G6PD,FECH,SLC25A40,KLF13,LSR,LTBP3,HDAC3,APC,PRCP,CASP3,EPAS1,SIT1,FBXL5,INPP5D,KCNQ1,MFHAS1,PICALM,SP3,KLF2,RHEB,AQP3,VPS13B,RB1,VEGFA,SLC25A5,RBPJ,MTF1,UCP2,TRAF6,ZFP36L1,HYAL2,MED1,TMEM63A,RAB7A,ADAM8,SNX10,HMGB2,ETS1,JAK2,PIK…
GO:BP	mitotic cell cycle	GO:0000278	FALSE	6.273536315355092e-7	6.202487583681692	892	6042	341	21026	BCL7A,TUBGCP5,TRIM71,EGF,TUBE1,CENPJ,GEN1,HECW2,RPS27L,INHBA,ABRAXAS1,SPHK1,MTMR3,GFI1B,ABCB1,CLTCL1,CDCA8,INSC,MYC,UBE2A,WAC,CTDSP1,CALM2,CDK7,MIIP,PPP6C,CDC42,TADA3,PAFAH1B1,ANAPC11,TP53,MTA3,MAPRE1,CCNH,RAD21,CUL3,AAAS,ARID1A,HDAC3,APC,KPNB1,BROX,ROCK1,TAOK3,RAE1,THAP1,ZC3H12D,EXOC6,PDGFB,KIFC2,PPM1D,CDKN2D,TUBG2,DIS3L2,CHMP2A,ZMPSTE24,RB1,CDC14A,SIK1,LZTS2,CHMP3,DYNLT1,SEPT6,CLIP1,PPP1R12A,ZF…
GO:BP	cellular response to oxygen-containing compound	GO:1901701	FALSE	6.332961810534194e-7	6.198393130877509	1182	6042	436	21026	MMP8,GRB10,IRAK3,RORA,KCNE1,MGST1,IGF1R,BPI,LTF,CSRP3,TNS2,DEFA4,CDK5R1,TRPM2,PLEKHA1,RAB13,NSG1,AGTRAP,RRAGD,CES1,MPO,SH2B2,MMP9,CTSD,CAMP,SIRPA,EPHA4,TLR2,CYFIP1,CYP1B1,IRS2,MAPK14,ITGB3,ECHDC3,INHBA,IRGM,SLC7A5,SPHK1,AQP1,PDK4,PF4V1,AKR1C3,CEBPE,PTPRK,FECH,CCR5,CMPK2,CTSG,GNB1,GSK3A,TP53,ANKK1,PLEC,CHUK,CUL3,PLSCR3,GNAI2,EIF4EBP2,APC,ROCK1,PXN,PDGFB,KCNQ1,TRIM24,GNAI3,RARG,KLF2,TRIM41,RHOQ,NCO…
GO:BP	leukocyte proliferation	GO:0070661	FALSE	6.410923988247824e-7	6.193079372341074	355	6042	157	21026	IKZF3,IL7R,HLA-DPB1,ARG1,XCL1,FCRL3,IRS2,CLU,CR1,F2RL1,MS4A1,ELF4,TP53,PSMB10,CD3E,CASP3,INPP5D,VAV3,PTPRC,CD300A,TRAF6,TNFRSF14,JAK2,STAT5B,CD46,LYN,TYROBP,PIK3CG,CD6,FADD,BID,GPR183,FOXJ1,MZB1,CCDC88B,PYCARD,TLR9,CTNNB1,EBI3,FCGR3A,IL10,LILRB4,TLR4,CD28,PLCL2,FOSL2,FOXP3,SLC7A1,CEBPB,HMGB1,ZNF335,DNAJA3,SYK,PRKAR1A,TNFRSF13B,IL1B,CD22,MALT1,CD151,IL23R,GSTP1,MAPK1,SOS2,IGF1,MNDA,CNN2,BTK,HPRT1,…
GO:BP	positive regulation of apoptotic process	GO:0043065	FALSE	6.41805224804082e-7	6.192596751724239	528	6042	218	21026	GADD45A,CDK5R1,MMP9,CTSD,HTRA1,CYP1B1,THBS1,GZMA,CLU,INHBA,RPS7,AKR1C3,ADM,MYC,NACC2,TNFSF12,CDC42,CRADD,TP53,APC,PTRH2,CASP3,INPP5D,PTPRC,TGFBR1,RARG,PLCG1,STYXL1,MAP3K5,CLIP3,GRN,FNIP1,SIK1,TSPO,HYAL2,ADAM8,LTK,NR3C1,JAK2,TRAF7,GADD45B,RRP1B,MAP2K4,LYN,APBB1,FOXO3,RET,DAPK3,FADD,BID,MAP3K9,LTA,RIPK1,HMOX1,CASP4,MYBBP1A,GADD45G,PYCARD,STK3,ARL6IP5,RASSF2,CTNNB1,PPP2R1A,PAK2,TRPV1,RAPGEF2,ACVR1C,…
GO:BP	regulation of phosphate metabolic process	GO:0019220	FALSE	6.686160417668404e-7	6.174823207810393	956	6042	362	21026	GRB10,IRAK3,TTC36,S100A12,GADD45A,LTF,HAX1,TNIK,NDUFS4,PPP1R17,CDK5R1,ELANE,FGF9,EGF,TRIB2,MMP9,NRG1,SIRPA,EPHA4,IRS2,THBS1,ITGB3,PPP1R26,INHBA,IRGM,SPHK1,PDK4,MTMR3,FECH,GSK3A,CTDSP1,CALM2,TADA3,TP53,CD3E,SERTAD1,PPP1R15B,HDAC3,APC,ROCK1,UBE2K,TAOK3,PRKAR1B,PDGFB,ITGB2,PTPRC,SPDYE2,TSG101,CDKN2D,HGS,CD300A,BRAT1,PLCG2,WDFY2,PDCD10,MAP3K5,CLIP3,TAB2,FNIP1,RB1,MIDN,MEN1,VEGFA,SLCO3A1,TRAF6,TSPO,TN…
GO:BP	positive regulation of cell adhesion	GO:0045785	FALSE	6.816441479665282e-7	6.166442289430702	488	6042	204	21026	OLFM4,IL7R,CEACAM6,HLA-DPB1,HSPH1,ELANE,GP6,XCL1,SKAP1,RHOH,NRG1,SIRPA,EPHA4,CD83,SELP,ITGB3,AZU1,GP1BA,CR1,DPP4,CTSG,ARPC2,CDC42,CD27,CD3E,NFKBID,ARID1A,ROCK1,VAV3,PDGFB,ITGB2,PTPRC,PREX1,ZMIZ1,PTPN23,VEGFA,TRAF6,ALOX5,TNFRSF14,ADAM8,ETS1,JAK2,RELL2,FCHO1,PIK3CA,STAT5B,CD46,LYN,FOXO3,RET,CD6,FADD,STX4,BAG4,CCDC88B,PYCARD,CD5,EBI3,B2M,CD44,IL10,LILRB4,BRD4,STK4,CD28,APBB1IP,FOXP3,SLC7A1,HLA-DRB5,…
GO:BP	negative regulation of transcription by RNA polymerase II	GO:0000122	FALSE	6.885221720018715e-7	6.162082069897947	938	6042	356	21026	MAFG,ZNF134,KLF12,GADD45A,ZNF141,EOMES,ELANE,CEBPA,FGF9,ATXN1L,SATB1,TBX21,IFI27,FOXQ1,NR1D2,GFI1B,JDP2,MYC,PLAGL1,NACC1,CTBP2,NACC2,MBD2,DR1,YY1,CBX3,TADA3,TP53,MTA3,MIER1,CUL3,JAZF1,KLF3,CBX5,HDAC3,ZNF350,THAP1,ATN1,UBE2D3,TRIM33,SAP30,SAP130,SUPT4H1,TSG101,RARG,MECP2,SP3,KLF2,SAP30L,NFIL3,FNIP1,RB1,HCFC1,MEN1,VEGFA,RBPJ,CBX1,DACH1,TRAF6,ZNF512B,MAZ,TXN,HSBP1,SP100,MED1,MAGED4B,ARID5B,FBP1,HMGB…
GO:BP	positive regulation of catabolic process	GO:0009896	FALSE	7.29016634201957e-7	6.137262562135109	546	6042	224	21026	PYHIN1,PNPLA2,ABCD2,TRIM71,CEBPA,WIPI1,EGF,TRIB2,ZDHHC19,IRS2,CLU,IRGM,ABCD1,TFEB,GSK3A,UBE2A,WAC,HERPUD1,TNFSF12,RNF139,CSDE1,APC,ROCK1,TNRC6A,YTHDF3,PSMC1,ZC3H12D,FBXL5,SH3GLB1,GNAI3,UBQLN1,ZER1,DIS3L2,UPF1,SEC22B,TMEM59,SLC25A5,EXOSC3,ZFP36L1,RAB7A,ADAM8,TMX1,MYLIP,SUMO1,CNOT3,C4BPA,TRAF7,FOXO3,CDKN1B,LRRK2,PFKFB1,C9ORF72,OAZ1,HMOX1,SNX18,PVT1,HSPA1A,TLR9,PIP4K2C,FXR1,USP13,SETD2,PTEN,RALB,LRS…
GO:BP	regulation of gene expression	GO:0010468	FALSE	7.414563160715225e-7	6.1299144309443605	5536	6042	1771	21026	MAFG,GPR18,TDRD9,MMP8,IRAK3,IKZF3,PYHIN1,ZNF134,IL7R,RORA,KLF12,TSHZ3,FZD5,ATF7IP2,CLEC3B,HLA-DPB1,ARG1,S100A12,BPI,GADD45A,ZNF141,LTF,BCL7A,CSRP3,HAX1,ASPH,EOMES,ABCD2,TRIM71,MIS18A,ALOX15B,CDK5R1,ELANE,CEBPA,FGF9,GPR174,SORT1,TGFBR3,ADORA3,ZNF527,MAML1,ZNF22,ATXN1L,ORM2,CLEC4E,TNFSF13,CLEC5A,XCL1,ABCC2,EGF,TRIB2,KDM7A,PRKACB,LY9,HINT1,SRPK1,DDX17,SKAP1,PGLYRP1,RHOH,FUT8,NRG1,SIRPA,TCF4,EPHA4,ZN…
GO:BP	cellular response to biotic stimulus	GO:0071216	FALSE	7.496940612708881e-7	6.125115929419992	252	6042	119	21026	MMP8,IRAK3,FZD5,BPI,LTF,DEFA4,MMP9,CAMP,SIRPA,TLR2,MAPK14,IRGM,SLC7A5,PF4V1,CEBPE,CCR5,CMPK2,CTSG,TP53,PLSCR3,PPP1R15B,TRIM41,CCDC47,PLCG2,UPF1,ZMPSTE24,PRPF8,TRAF6,TSPO,NFKBIA,HMGB2,JAK2,NLRP7,VIM,LYN,IRF3,CD6,CARD16,PYCARD,TLR9,MAP2K3,CX3CR1,IL10,NR1H4,TLR4,CDK19,NR1D1,CXCL2,TLR1,CXCL1,HMGB1,SYK,IL1B,MALT1,LY96,MTDH,GSTP1,MAPK1,CD36,RARA,GSK3B,RBM14,NR1H3,BTK,NOTCH2,CDK4,CASP1,CD180,BCR,HADHB,S…
GO:BP	endosomal transport	GO:0016197	FALSE	8.185330078255653e-7	6.086963802718182	290	6042	133	21026	ARL4C,SORT1,RAB13,NSG1,REPS2,CLTCL1,PIK3C3,ARHGAP1,VTI1A,PLEKHA3,TSG101,PICALM,HGS,PTPN23,CHMP2A,VPS13B,ATP6AP1,CHMP3,RAB7A,CHMP1B,LYST,ARFIP1,SNX6,RAB21,LRRK2,RAB10,EHD1,SPAG9,RAB35,DENND1A,SNX18,VPS4B,CHMP7,TMCC1,BET1L,MTMR4,VAMP3,VPS26A,GRIPAP1,ZFYVE16,TOM1,RAB5A,ARL8B,VPS29,SNX30,RAB11B,VTI1B,SNX3,MAPK1,EVI5,HOOK3,CHMP1A,TMEM87A,PXK,VPS37B,DPY30,TBC1D10C,HEATR5A,LMTK2,HOOK1,GRIP1,SNX2,VPS52,V…
GO:BP	nuclear transport	GO:0051169	FALSE	8.589527779695983e-7	6.066030711408515	334	6042	149	21026	XPO1,FGF9,THOC1,MAPK14,SDAD1,IFI27,KPNA3,SEC13,TP53,AAAS,HDAC3,KPNB1,RAE1,YTHDC1,RBM8A,RANBP3,UPF1,LZTS2,HTATIP2,PPP1R12A,TXN,NFKBIA,SP100,HYAL2,MED1,ENY2,SUPT6H,JAK2,TRIM28,SUMO1,XPO7,THOC6,CDKN1B,LRRK2,NUP210,NUP160,THOC7,SMG6,RSRC1,HCLS1,PTTG1IP,STK3,XPO4,SETD2,FRAT1,STK4,EIF4A3,KPNA4,TRAF3IP2,MDN1,PPP1R10,NUP153,RBM4,IER3,NUP62CL,SYK,E2F3,FRAT2,IL1B,PPP3R1,HEATR3,MALT1,NUP214,BACH2,EMD,PTPN11…
GO:BP	nucleocytoplasmic transport	GO:0006913	FALSE	8.589527779695983e-7	6.066030711408515	334	6042	149	21026	XPO1,FGF9,THOC1,MAPK14,SDAD1,IFI27,KPNA3,SEC13,TP53,AAAS,HDAC3,KPNB1,RAE1,YTHDC1,RBM8A,RANBP3,UPF1,LZTS2,HTATIP2,PPP1R12A,TXN,NFKBIA,SP100,HYAL2,MED1,ENY2,SUPT6H,JAK2,TRIM28,SUMO1,XPO7,THOC6,CDKN1B,LRRK2,NUP210,NUP160,THOC7,SMG6,RSRC1,HCLS1,PTTG1IP,STK3,XPO4,SETD2,FRAT1,STK4,EIF4A3,KPNA4,TRAF3IP2,MDN1,PPP1R10,NUP153,RBM4,IER3,NUP62CL,SYK,E2F3,FRAT2,IL1B,PPP3R1,HEATR3,MALT1,NUP214,BACH2,EMD,PTPN11…
GO:BP	export from cell	GO:0140352	FALSE	9.414323732841092e-7	6.026210871573384	928	6042	352	21026	RETN,PFKFB2,STX17,KCNE1,FCER1A,SYTL2,VEGFC,RAB13,ABAT,ADORA3,ABCC2,FAM3B,SYP,TLR2,IRS2,INHBA,ATP7B,SUCNR1,AQP1,GAB2,F2RL1,CD177,ABCB1,MCTP1,LAMP1,CALM2,OLFM2,PAFAH1B1,GNAI2,KIF5B,SERP1,PCSK5,EXOC6,STXBP3,ITGB2,KCNQ1,TSG101,TMEM167A,DNAJC5,MECP2,HGS,CD300A,PTPN23,CHMP2A,RAP1B,MIDN,BLOC1S3,ARFGEF1,UCP2,ALOX5,TSPO,HPS6,ANK1,CAMK2G,FGR,RAP1A,ENY2,RAB7A,CYB5R4,ADAM8,JAK2,IL1RN,RAB1A,MICAL3,ARFIP1,VPS1…
GO:BP	regulation of protein localization	GO:0032880	FALSE	9.707053291583084e-7	6.012912586098868	907	6042	345	21026	PFKFB2,PYHIN1,KCNE1,CCT2,FZD5,XPO1,VEGFC,CSRP3,HAX1,ASPH,CDK5R1,ABAT,EGF,CTSD,TLR2,IRS2,MAPK14,ITGB3,HSP90AB1,CENPJ,IFI27,F2RL1,TNFAIP6,TOR1A,GSK3A,MARK3,CDC42,RTN4,HDAC3,KIF5B,APC,TMEM30A,UBE2D3,SERP1,VCPIP1,SH3GLB1,EDEM1,ITGB2,MFHAS1,TSG101,PICALM,PTPN23,RHOQ,SSH1,PDCD10,CLIP3,MIDN,TMEM59,VEGFA,LZTS2,UCP2,TRAF6,ALOX5,TXN,RAP1A,SP100,HYAL2,ENY2,ADAM8,NUMA1,NDEL1,JAK2,TRIM28,PIK3CA,SUMO1,ARFIP1,H…
GO:BP	regulation of intrinsic apoptotic signaling pathway	GO:2001242	FALSE	9.847204700349064e-7	6.006687034020404	177	6042	90	21026	MMP9,CLU,RPS7,GRINA,MYC,HERPUD1,NACC2,HYOU1,TP53,TMBIM6,SGMS1,UBQLN1,CDKN2D,STYXL1,LRRK2,Q16594,BID,PTTG1IP,PYCARD,HSPA1A,ING2,CTNNB1,CD44,IL10,PMAIP1,SYVN1,SERINC3,RRN3,RTKN2,GPX1,TXNDC12,TAF9B,HNRNPK,PINK1,TRAP1,PYCR1,ARMC10,USP15,PARL,ELL3,HSPB1,BBC3,IVNS1ABP,PLAUR,NONO,FBXW7,SKIL,S100A9,WNT1,NOL3,PDX1,AKT1,ATAD5,RNF183,PTGS2,VDAC2,TAF6,HDAC1,MAPK7,PTPN1,NOC2L,BAG5,ENO1,SIRT1,SIAH1,PARK2,CXCL1…
GO:BP	cellular response to tumor necrosis factor	GO:0071356	FALSE	9.958810959501075e-7	6.001792511431105	208	6042	102	21026	MMP8,RORA,CEBPA,CAMP,CYP1B1,THBS1,MAPK14,SPHK1,F2RL1,NAIP,TP53,CHUK,UBE2K,SHARPIN,KRT18,KLF2,CD58,PRPF8,MAP3K5,TRAF6,TNFRSF14,ZFP36L1,NFKBIA,HYAL2,JAK2,RRAGA,ZFAND6,FOXO3,PYDC1,CARD16,HIPK1,RIPK1,BAG4,CASP4,PYCARD,HSPA1A,XIAP,TRPV1,KAT2A,CX3CR1,RFFL,TANK,TNFRSF19,NR1H4,NR1D1,TRAF3IP2,INPP5K,TNFRSF25,SYK,TNFRSF17,SPATA2,TMSB4X,GSTP1,MAPK1,DHX9,AIM2,NSMAF,ASAH1,IKBKB,KRT8,FAS,TRAF1,CASP1,DICER1,ZFP…
GO:BP	protein modification by small protein conjugation	GO:0032446	FALSE	0.0000010262013584423965	5.9887674147794	853	6042	327	21026	DCAF16,KLHL20,TTC36,RNF144B,TRIM71,ANKRD9,HSP90AB1,HECW2,IFI27,SPHK1,CEP78,RPS7,SIAH2,RNF135,MED21,COPS7B,TRIP12,GSK3A,UBE2A,HERPUD1,ANAPC11,RNF139,CUL3,LMO7,HDAC3,RNF181,UBE2K,EPAS1,UBE2D3,KCTD21,FBXL5,SHARPIN,VCPIP1,TRIM33,TRIM24,TOLLIP,UBQLN1,TGFBR1,PHF23,TNFAIP1,ZMIZ1,TRIM41,RNF13,UBE2R2,TRAF6,TSPO,MED1,UBE2W,RNF130,FBXL22,PDCD6,MYLIP,RNF141,TRIM28,SUMO1,WSB2,HECTD3,TRAF7,FEM1C,VPS18,MGRN1,LR…
GO:BP	leukocyte activation involved in immune response	GO:0002366	FALSE	0.0000012028253084084103	5.91979744257145	316	6042	142	21026	ITM2A,RORA,FCER1A,EOMES,CD1C,CLEC4E,TNFSF13,LY9,PGLYRP1,CR1,TBX21,SEMA4A,SUCNR1,GAB2,F2RL1,CD177,STAT4,LAMP1,TNFSF12,TP53,NFKBID,STXBP3,ITGB2,PTPRC,CD300A,ATP7A,PLCG2,GRN,MEN1,EXOSC3,FGR,SUPT6H,CCR6,CD46,LYN,TYROBP,PIK3CG,IRF4,STX4,GPR183,PTGER4,PYCARD,FCGR3A,CX3CR1,ITGAM,IL10,BRD4,TLR4,RAB27A,CD28,ASCL2,NMI,APBB1IP,PLCL2,FOXP3,HMGB1,EXOSC6,SYK,PLXNA1,MALT1,PMS2,FES,IL23R,LCP1,RELB,LFNG,CLEC4D,PR…
GO:BP	purine nucleotide biosynthetic process	GO:0006164	FALSE	0.0000012212646019438546	5.913190230637977	193	6042	96	21026	NME7,NDUFS4,AK3,NDUFB1,GMPR2,NDUFA1,NDUFB4,NDUFA2,NDUFB3,NDUFB6,IMPDH1,NPR2,ND5,ATP6V0C,ATP6,ATP5J,NMNAT1,SDHB,SDHD,DNAJC30,NADK,ND4,NDUFB5,ATP6V1A,NDUFA8,AK4,TMSB4X,TAZ,NDUFS6,NDUFC1,SDHC,NDUFS2,HPRT1,PINK1,NDUFB11,VCP,PRKAG2,PAICS,NDUFC2,IMPDH2,NAMPT,NPPA,HAAO,NDUFB10,ND2,PPAT,NDUFV2,NDUFB7,KYNU,KMO,IDO2,ADCY2,NDUFA9,ATIC,GMPS,SDHA,NDUFS7,ENO1,PFAS,TGFB1,NDUFA12,PARP1,SLC25A13,ND4L,MTHFD1,NDUFA…
GO:BP	regulation of response to biotic stimulus	GO:0002831	FALSE	0.0000012393947606274543	5.906790344103231	540	6042	221	21026	IRAK3,KLRB1,SH2D1A,PYHIN1,ARG1,LTF,CLEC4E,CLEC12B,TLR2,FCRL3,CR1,IRGM,SERPING1,F2RL1,RNF135,NAIP,KLRC4,LAMP1,ZDHHC3,PPP6C,UFD1L,CHUK,RTN4,UBE2K,YTHDF3,MFHAS1,UBQLN1,TRIM41,CD300A,PLCG2,ZMPSTE24,USP38,GRN,TRAF6,PPM1B,FGR,NFKBIA,MED1,SARM1,ADAM8,HMGB2,RIOK3,TLR8,TAX1BP1,STAT5B,EIF4E2,LYN,TYROBP,IRF3,IRF4,FADD,ATG12,CARD16,PYCARD,HSPA1A,XIAP,TLR9,PAK2,BANF1,ELMOD2,NR1H4,TLR4,NINJ1,PAK1,LRSAM1,NR1D1,…
GO:BP	cellular response to lipid	GO:0071396	FALSE	0.0000012427308130214723	5.905622933369591	613	6042	246	21026	MMP8,IRAK3,RORA,MGST1,IGF1R,BPI,LTF,DEFA4,CES1,DDX17,MMP9,CAMP,SIRPA,TLR2,CYP1B1,MAPK14,INHBA,IRGM,SLC7A5,AQP1,PDK4,PF4V1,AKR1C3,CEBPE,FECH,CCR5,CMPK2,CTSG,GNB1,GSK3A,TADA3,ANKK1,SAFB2,PLSCR3,TRIM24,RARG,ZMIZ1,TRIM41,NCOA4,PLCG2,UPF1,PRPF8,TRAF6,TSPO,MAP4K1,ZFP36L1,NFKBIA,MED1,FBP1,ESRRA,LTK,HMGB2,NR3C1,JAK2,HDAC2,SERPINF1,NLRP7,VPS18,VIM,LYN,FOXO3,RET,RXRA,IRF3,TRIP4,LBH,CD6,PTGER4,CARD16,PYCARD…
GO:BP	rRNA processing	GO:0006364	FALSE	0.0000015056678433051262	5.822270824768813	225	6042	108	21026	DDX17,UTP20,RPF2,ZNHIT3,RPS7,UTP14A,POP5,URB1,POP7,LSM6,TRMT2B,EXOSC3,NSUN5,RIOK3,RRP1B,NOP10,NOL9,PPAN,NOP2,RRP36,KRI1,EIF4A3,ERI3,EXOSC6,RPUSD1,POP4,WDR74,NOC4L,NUDT16,RNASEL,RRP1,CHD7,MRM1,FCF1,PPAN-P2RY11,NSUN3,NAT10,EXOSC2,BMS1,TSR3,REXO4,UTP6,PELP1,MPHOSPH6,LAS1L,PDCD11,NSUN4,BOP1,WBP11,EXOSC10,NOLC1,NOL11,WDR3,RPUSD2,DDX54,RRP9,NOL10,PWP2,IMP3,NOP56,SUV39H1,UTP14C,DDX10,UTP15,RRS1,NHP2L1,P…
GO:BP	negative regulation of immune system process	GO:0002683	FALSE	0.0000015338011010375158	5.814230954808435	515	6042	212	21026	GPR18,IRAK3,SH2D1A,IL7R,ARG1,BPI,LTF,CEBPA,XCL1,CLEC12B,PGLYRP1,FCRL3,THBS1,TIGIT,MAPK14,CR1,INHBA,TBX21,IRGM,SERPING1,F2RL1,DPP4,TNFAIP6,CTSG,MYC,PSMB4,PPP6C,UFD1L,TMBIM6,YTHDF3,CASP3,INPP5D,PTPRC,MFHAS1,UBQLN1,UBASH3A,CD300A,PLCG1,USP38,GRN,TNFRSF14,FGR,SARM1,RIOK3,TAX1BP1,EIF4E2,C4BPA,CD46,LYN,TYROBP,IRF4,C9ORF72,FADD,PTGER4,ATG12,HMOX1,FOXJ1,CTNNB1,MMP28,BANF1,LILRB3,CX3CR1,IL10,LILRB4,TLR4,A…
GO:BP	negative regulation of molecular function	GO:0044092	FALSE	0.000001615840654298098	5.7916014692861575	553	6042	225	21026	IRAK3,TIMP2,KCNE1,PTX3,GADD45A,LTF,HP,EOMES,SORT1,ADORA3,XCL1,CLEC12B,TRIB2,MMP9,CYP1B1,IRS2,ITGB3,GZMA,PPP1R26,SLPI,CR1,RPS7,UBLCP1,GSK3A,CALM2,TP53,CHUK,GNAI2,APC,TMBIM6,ROCK1,GSTM2,USP33,GLA,KCNQ1,PTPRC,GNAI3,TSG101,UBQLN1,TERF2,CD300A,RB1,MIDN,MEN1,SIK1,ARFGEF1,PPP1R12A,MVP,NFKBIA,SP100,HYAL2,FICD,JAK2,TINF2,TAX1BP1,SERPINB1,SUMO1,HDAC2,RRP1B,LYN,SNX6,CDKN1B,LRRK2,CARD16,CSTA,FOXJ1,HDAC4,NEIL…
GO:BP	regulation of canonical NF-kappaB signal transduction	GO:0043122	FALSE	0.0000016213398478588767	5.790125943461062	287	6042	131	21026	RORA,S100A12,LTF,TGFBR3,RHOH,S100B,IRGM,F2RL1,CHUK,MIER1,MAP3K3,SHARPIN,PLCG2,TAB2,VEGFA,TRAF6,PPM1B,NFKBIA,RIOK3,TLR8,ZFAND6,S100A4,IRF3,PYDC1,TRAF4,FADD,CARD16,RIPK1,HMOX1,PYCARD,XIAP,TLR9,LIME1,CX3CR1,CAPN3,LILRB4,TANK,BRD4,TNFRSF19,NR1H4,TLR4,NR1D1,FBXW11,TRAF3IP2,TNFRSF10B,USP20,TRIM25,TRIM8,DNAJA3,NLRX1,IL1B,SHISA5,MALT1,MTDH,TMSB4X,GSTP1,NEK6,TMEM9B,CLEC4D,CD36,RFPL1,IKBKB,BTRC,EDA,PINK1,C…
GO:BP	mitochondrial electron transport, NADH to ubiquinone	GO:0006120	FALSE	0.000001622173187438508	5.7899027812384904	51	6042	36	21026	NDUFS4,NDUFA4,NDUFB1,NDUFA1,NDUFB4,NDUFA2,NDUFB3,NDUFB6,NDUFAF1,ND5,ND4,NDUFB5,NDUFA8,NDUFS6,NDUFC1,ISCU,NDUFS2,PINK1,NDUFC2,NDUFB10,ND2,NDUFV2,NDUFB7,NDUFA9,NDUFS7,ND4L,NDUFS5,NDUFB2,NDUFS3,NDUFS8,PARK7,NDUFV1,NDUFB9,NDUFAB1,MT-ND3,MT-ND1
GO:BP	positive regulation of transport	GO:0051050	FALSE	0.0000016333218174105845	5.786928236723394	847	6042	324	21026	RETN,CACNB2,PFKFB2,KCNE1,PTX3,PLTP,VEGFC,ASPH,ABAT,CES1,XCL1,EGF,SIRPA,TLR2,IRS2,MAPK14,AZU1,CLU,INHBA,ABCA13,HIP1,SLC7A5,AQP1,GAB2,F2RL1,G6PD,CD177,MS4A1,CLTCL1,CD63,TOR1A,LAMP1,GSK3A,CALM2,CDC42,SLC34A1,HDAC3,KIF5B,TMEM30A,GSTM2,SERP1,PDGFB,EDEM1,ITGB2,KCNQ1,PTPRC,TSG101,MECP2,HGS,PTPN23,PLCG1,RHOQ,CHMP2A,PLCG2,PDCD10,CLIP3,VEGFA,OSBPL8,TSPO,FGR,NFKBIA,HYAL2,RAB7A,ADAM8,NUMA1,JAK2,TRIM28,APBB1,…
GO:BP	positive regulation of cell development	GO:0010720	FALSE	0.0000017203773844895482	5.764376275171626	458	6042	192	21026	IL7R,VCAN,VEGFC,HAX1,SHTN1,RHOH,EPHA4,TLR2,CYFIP1,CD83,CR1,SLC7A5,CD101,HAPLN2,CD27,PAFAH1B1,NFKBID,ARID1A,INPP5D,PTPRC,MECP2,ZMIZ1,RHEB,RB1,VEGFA,TRAF6,TSPO,ZFP36L1,ADAM8,STAT5B,HDAC2,SERPINF1,ZFYVE27,CD46,LYN,RAB21,FOXO3,RET,TYROBP,STAU2,SOX8,FADD,LTA,RIPK1,HCLS1,HAPLN3,TLR9,CTNNB1,CX3CR1,FXR1,IL10,CTNNBIP1,LILRB4,BRD4,SLC9B2,RFX3,NIN,PLXNA3,SNW1,FOXP3,ANAPC2,QKI,HMGB1,ZNF335,SMARCD3,BMP2,SYK,P…
GO:BP	cell cycle process	GO:0022402	FALSE	0.0000017972712337455623	5.745386376741854	1280	6042	465	21026	TDRD9,IGF1R,XPO1,GADD45A,BCL7A,TUBGCP5,TRIM71,MIS18A,CDK5R1,EGF,SRPK1,TUBE1,MAPK14,CENPJ,GEN1,TESMIN,HECW2,RPS27L,INHBA,ABRAXAS1,SPHK1,MTMR3,GFI1B,ABCB1,CDCA8,INSC,DMRTC2,MYC,ACTR2,CEP68,UBE2A,WAC,CTDSP1,ACTR3,CALM2,CDK7,MIIP,PPP6C,CDC42,PIK3C3,PAFAH1B1,ANAPC11,TP53,ANKK1,PLEC,MTA3,MAPRE1,CCNH,RAD21,CUL3,NAA60,AAAS,ARID1A,HDAC3,APC,KPNB1,BROX,ROCK1,TAOK3,RAE1,MCMBP,ZC3H12D,USP33,SH3GLB1,EXOC6,PDG…
GO:BP	rRNA metabolic process	GO:0016072	FALSE	0.0000019798740863532052	5.703362428597465	266	6042	123	21026	DDX17,UTP20,RPF2,ZNHIT3,RPS7,UTP14A,POP5,TP53,URB1,POP7,POLR2E,LSM6,TRMT2B,EXOSC3,NSUN5,RIOK3,RRP1B,NOP10,NOL9,DDX11,PELO,PPAN,NOP2,RRP36,KRI1,EIF4A3,ERI3,EXOSC6,RPUSD1,POP4,WDR74,NOC4L,NUDT16,RNASEL,RRP1,TCOF1,CHD7,MRM1,FCF1,PPAN-P2RY11,NSUN3,NAT10,EXOSC2,BMS1,TSR3,REXO4,UTP6,POLR1G,PELP1,MPHOSPH6,LAS1L,PDCD11,DEDD2,NSUN4,BOP1,WBP11,GTF3C1,EXOSC10,NOLC1,NOL11,WDR3,RPUSD2,DDX54,RRP9,SMARCA4,NOL10…
GO:BP	homeostasis of number of cells	GO:0048872	FALSE	0.00000212600505924511	5.672435706322779	332	6042	147	21026	IL7R,GPR174,TGFBR3,OCIAD2,SH2B2,ALAS2,MAPK14,INHBA,G6PD,FECH,SLC25A40,KLF13,CASP3,EPAS1,SIT1,INPP5D,KCNQ1,MFHAS1,SP3,KLF2,RB1,VEGFA,SLC25A5,ZFP36L1,MED1,HMGB2,ETS1,JAK2,STAT5B,RCOR1,LYN,FOXO3,PTBP3,FADD,GPR183,HCLS1,HMOX1,HSPA1A,XIAP,RASSF2,PPP2R1A,B2M,CX3CR1,XKR8,PMAIP1,BBIP1,BPGM,SPNS2,TRAF3IP2,FOSL2,FOXP3,LPCAT3,HMGB1,GIGYF2,DNAJA3,IREB2,TNFRSF13B,TNFRSF17,HEATR3,SLC4A1,PTPN11,RRN3,HDAC6,GCNT4…
GO:BP	cytoskeleton organization	GO:0007010	FALSE	0.0000022662240676112564	5.6446971524972165	1529	6042	544	21026	KLHL20,XPO1,EVL,GADD45A,CSRP3,HAX1,TNIK,PSTPIP2,TUBGCP5,NME7,CDK5R1,PGM5,TRPM2,RAB13,CLIC4,SH2B2,RSPH9,FGD4,IFT56,MYL9,TNNT1,SHTN1,RHOH,TUBE1,CYFIP1,ITGB3,CENPJ,GEN1,HIP1,ABRAXAS1,KIF21A,AQP1,F2RL1,ITGB5,SH3BP1,CDCA8,INSC,TOR1A,ACTR2,GSK3A,CEP68,ACTR3,ARPC2,ARPC3,CDC42,MARCKSL1,SPTAN1,BRK1,PAFAH1B1,DIAPH1,PLEC,MINK1,MAPRE1,CAPZA1,CUL3,AAAS,HDAC3,APC,KPNB1,ROCK1,RAE1,PXN,SPECC1,USP33,NEB,ARHGAP26,…
GO:BP	protein ubiquitination	GO:0016567	FALSE	0.0000022995311394039866	5.6383607049941595	768	6042	297	21026	DCAF16,KLHL20,TTC36,RNF144B,TRIM71,ANKRD9,HSP90AB1,HECW2,IFI27,SPHK1,CEP78,RPS7,SIAH2,RNF135,MED21,TRIP12,GSK3A,UBE2A,HERPUD1,ANAPC11,RNF139,CUL3,LMO7,HDAC3,RNF181,UBE2K,UBE2D3,KCTD21,FBXL5,SHARPIN,VCPIP1,TRIM33,TRIM24,UBQLN1,TGFBR1,PHF23,TNFAIP1,TRIM41,RNF13,UBE2R2,TRAF6,TSPO,MED1,UBE2W,RNF130,FBXL22,PDCD6,MYLIP,RNF141,WSB2,HECTD3,TRAF7,FEM1C,VPS18,MGRN1,LRRK2,SPOPL,USP4,ANAPC13,UBE2J1,PTTG1IP,R…
GO:BP	response to tumor necrosis factor	GO:0034612	FALSE	0.0000023147680512071988	5.635492520467887	229	6042	109	21026	MMP8,RORA,CEBPA,CAMP,CYP1B1,THBS1,MAPK14,SPHK1,F2RL1,NAIP,TP53,CHUK,UBE2K,CASP3,SHARPIN,KRT18,KLF2,CD58,PRPF8,MAP3K5,TRAF6,TNFRSF14,ZFP36L1,NFKBIA,HYAL2,JAK2,RRAGA,ZFAND6,FOXO3,PYDC1,CARD16,HIPK1,RIPK1,BAG4,CASP4,PYCARD,HSPA1A,XIAP,TRPV1,KAT2A,CX3CR1,RFFL,TANK,TNFRSF19,NR1H4,NR1D1,TRAF3IP2,INPP5K,TNFRSF25,SYK,TNFRSF17,SPATA2,TMSB4X,GSTP1,MAPK1,DHX9,AIM2,NSMAF,ASAH1,IKBKB,KRT8,FAS,TRAF1,CASP1,DICE…
GO:BP	nucleotide biosynthetic process	GO:0009165	FALSE	0.0000023147680512071988	5.635492520467887	229	6042	109	21026	NME7,NDUFS4,AK3,CMPK2,NDUFB1,GMPR2,NDUFA1,NDUFB4,NDUFA2,NDUFB3,CAD,NDUFB6,AK8,IMPDH1,NPR2,ND5,TBPL1,ATP6V0C,ATP6,ATP5J,NMNAT1,SDHB,SDHD,DNAJC30,NADK,ND4,RRM2,NDUFB5,ATP6V1A,NDUFA8,AK4,TMSB4X,TAZ,NDUFS6,NDUFC1,SDHC,NDUFS2,HPRT1,PINK1,NDUFB11,VCP,PRKAG2,FLAD1,PAICS,NDUFC2,IMPDH2,NAMPT,NPPA,HAAO,NDUFB10,TK2,ND2,PPAT,NDUFV2,NDUFB7,KYNU,KMO,IDO2,ADCY2,NDUFA9,ATIC,GMPS,UPRT,SDHA,NDUFS7,ENO1,PFAS,TGFB1,…
GO:BP	antigen receptor-mediated signaling pathway	GO:0050851	FALSE	0.0000024643651340904843	5.6082949442461105	195	6042	96	21026	SH2D1A,CD3G,HLA-DPB1,PLEKHA1,CD8A,SH2B2,SKAP1,BTN3A2,FCRL3,CD3D,MS4A1,CD8B,BMX,CD3E,NFKBID,INPP5D,VAV3,PTPRC,UBASH3A,CD300A,BTN2A1,PLCG1,PLCG2,ITK,TRAF6,NFAM1,NFKBIA,FCHO1,PIK3CA,LYN,CMTM3,LIME1,LILRB4,CD28,PLCL2,TRAT1,FOSL2,FOXP3,SLA2,SYK,CD79B,CD22,MALT1,BLK,MAPK1,SPG21,DGKZ,IKBKB,MNDA,UBR2,BTK,BTRC,CARD11,SLC39A10,CD79A,ICOSLG,CD19,LGALS3,PRAM1,MAP3K7,CBLB,ABL1,ELF1,HLA-A,BLNK,PVRIG,TMIGD2,IGH…
GO:BP	protein stabilization	GO:0050821	FALSE	0.000002550264160029855	5.593414832388985	224	6042	107	21026	PYHIN1,CCT2,OTUD3,EPHA4,HSP90AB1,CLU,HIP1,IRGM,ABTB3,RPS7,LAMP1,CDK7,TP53,CCNH,RTN4,NAPG,POLR2E,USP33,COG7,PDCD10,GRN,HCFC1,SUMO1,RAB21,TYROBP,Q16594,BAG4,HSPA1A,STK3,RASSF2,GOLGA7,USP13,SYVN1,PTEN,STK4,TMC8,RABL3,ATP1B3,RPAP3,IFI30,MFSD1,DNAJA3,CEP63,LAMP2,CREB1,TRIM44,SMAD3,GNAQ,SEL1L,TAF9B,IGF1,CRYAA,PIM1,PINK1,TBL1Y,STX12,STXBP1,AHSP,FBXW7,TBL1X,PFN1,TSC1,SOX4,WNT10B,ATP1B1,CCT7,USP19,WDR81,R…
GO:BP	myeloid leukocyte differentiation	GO:0002573	FALSE	0.000002572478152130863	5.589648304981195	240	6042	113	21026	LTF,HAX1,CEBPA,MMP9,TLR2,MAPK14,INHBA,GAB2,F2RL1,OSCAR,CEBPE,TNFAIP6,MYC,CD101,CDC42,PAFAH1B1,INPP5D,SP3,OSTM1,ATP6AP1,RB1,VEGFA,RBPJ,UCP2,TRAF6,ZFP36L1,MED1,SNX10,NR3C1,LYN,TYROBP,IRF4,CAMK4,FADD,GPR183,SH3PXD2A,RIPK1,HCLS1,P2RX5,RASSF2,CTNNB1,LILRB3,LBR,CTNNBIP1,LILRB4,TLR4,SLC9B2,UBASH3B,FOSL2,CEBPB,QKI,FAM20C,IREB2,BMP2,CBFA2T3,EVI2B,FES,IL23R,CREB1,RELB,SIGLEC15,APP,DHRS7B,RARA,NOTCH2,GPC3,S…
GO:BP	T cell differentiation	GO:0030217	FALSE	0.000002636121074911424	5.579034646825227	319	6042	142	21026	GPR18,IKZF3,CD3G,IL7R,RORA,FZD5,EOMES,CD8A,CLEC4E,LY9,RHOH,CD83,CD3D,CR1,TBX21,SEMA4A,STAT4,CD27,TP53,CD3E,NFKBID,ARID1A,TCF7,PTPRC,PREX1,ZMIZ1,SP3,ATP7A,MEN1,ITK,ZFP36L1,ADAM8,STAT5B,CCR6,CD46,FOXO3,IRF4,CAMK4,FADD,GPR183,PTGER4,FOXJ1,CTNNB1,B2M,KAT2A,LILRB4,BRD4,RABL3,CD28,ASCL2,TRAF3IP2,FOSL2,FOXP3,HMGB1,SMARCD3,LEPR,DNAJA3,SYK,IL1B,ATG5,MALT1,VAV1,IL23R,RELB,LFNG,CLEC4D,PRKCZ,SOS2,CLPTM1,JMJD…
GO:BP	protein modification by small protein conjugation or removal	GO:0070647	FALSE	0.0000027256817939437047	5.56452484666743	975	6042	365	21026	DCAF16,KLHL20,TTC36,RNF144B,TRIM71,OTUD3,HINT1,ANKRD9,HSP90AB1,HECW2,IFI27,ABRAXAS1,SPHK1,CEP78,RPS7,SIAH2,RNF135,MED21,TOR1A,COPS7B,TRIP12,GSK3A,UBE2A,HERPUD1,ANAPC11,RNF139,CUL3,LMO7,USP39,HDAC3,RNF181,UBE2K,EPAS1,UBE2D3,KCTD21,FBXL5,SHARPIN,VCPIP1,USP33,TRIM33,TRIM24,TOLLIP,UBQLN1,USP21,TGFBR1,PHF23,TNFAIP1,ZMIZ1,SENP3,TRIM41,RNF13,USP38,UBE2R2,TRAF6,TSPO,MED1,UBE2W,RNF130,FBXL22,PDCD6,MYLIP,R…
GO:BP	production of molecular mediator of immune response	GO:0002440	FALSE	0.0000028453748297718613	5.545860514583875	227	6042	108	21026	IRAK3,FZD5,ARG1,ELANE,TNFSF13,XCL1,FCRL3,CR1,TBX21,IL1R1,SLC7A5,F2RL1,YY1,TNFSF12,RTN4,TMBIM6,PTPRC,PLCG2,TRAF6,EXOSC3,TNFRSF14,SUPT6H,CCR6,XRCC4,STX4,UBE2J1,MZB1,PYCARD,TLR9,B2M,IL10,LILRB4,TLR4,CD28,TRAF3IP2,FOXP3,EXOSC6,SYK,NLRX1,IL1B,ATG5,CD22,MALT1,PMS2,PRKCZ,CD36,BTK,LACC1,CD40LG,SPON2,SECTM1,MAP3K7,PGC,CD7,IL18,TNFRSF4,CLNK,BCL6,HLA-A,BATF,CCR2,SCIMP,CD86,MSH3,CD226,ATAD5,SLC15A4,C17ORF99,…
GO:BP	secretion by cell	GO:0032940	FALSE	0.00000297014165428958	5.527222837481018	854	6042	325	21026	RETN,PFKFB2,STX17,FCER1A,SYTL2,VEGFC,RAB13,ABAT,ADORA3,FAM3B,SYP,TLR2,IRS2,INHBA,SUCNR1,AQP1,GAB2,F2RL1,CD177,MCTP1,LAMP1,OLFM2,PAFAH1B1,GNAI2,SERP1,PCSK5,EXOC6,STXBP3,ITGB2,KCNQ1,TSG101,TMEM167A,DNAJC5,MECP2,HGS,CD300A,PTPN23,CHMP2A,RAP1B,MIDN,BLOC1S3,ARFGEF1,UCP2,ALOX5,TSPO,HPS6,ANK1,CAMK2G,FGR,RAP1A,ENY2,RAB7A,CYB5R4,ADAM8,JAK2,IL1RN,RAB1A,MICAL3,ARFIP1,VPS18,LYN,APBB1,RAB21,PIK3CG,LRRK2,RAB10…
GO:BP	regulation of immune effector process	GO:0002697	FALSE	0.0000031842096423300786	5.496998346867191	401	6042	171	21026	IRAK3,KLRB1,SH2D1A,IL7R,FZD5,ARG1,CD1C,TNFSF13,XCL1,CLEC12B,PGLYRP1,FCRL3,CR1,TBX21,IL1R1,SERPING1,SLC7A5,GAB2,F2RL1,CD177,KLRC4,LAMP1,TNFSF12,NFKBID,RTN4,TMBIM6,ITGB2,PTPRC,CD300A,PLCG2,GRN,TRAF6,EXOSC3,TNFRSF14,FGR,SUPT6H,STAT5B,C4BPA,CD46,LYN,TYROBP,IRF4,FADD,STX4,LTA,UBE2J1,FOXJ1,MZB1,PYCARD,TLR9,MYO18A,B2M,CX3CR1,ITGAM,IL10,LILRB4,BRD4,TLR4,CD28,ASCL2,FOXP3,HMGB1,EXOSC6,SYK,NLRX1,IL1B,ATG5,C…
GO:BP	regulation of leukocyte differentiation	GO:1902105	FALSE	0.000005183391651047958	5.285385975134456	330	6042	145	21026	IKZF3,IL7R,LTF,HAX1,PGLYRP1,RHOH,FCRL3,CD83,CR1,INHBA,TBX21,TNFAIP6,MYC,CD101,CD27,NFKBID,ARID1A,TCF7,INPP5D,PTPRC,ZMIZ1,RB1,TRAF6,NFAM1,ZFP36L1,ADAM8,STAT5B,CD46,LYN,FOXO3,TYROBP,IRF4,CAMK4,FADD,RIPK1,HCLS1,FOXJ1,TLR9,RASSF2,CTNNB1,LILRB3,KAT2A,IL10,CTNNBIP1,LILRB4,BRD4,TLR4,SLC9B2,CD28,ASCL2,UBASH3B,FOXP3,CEBPB,QKI,HMGB1,SMARCD3,SYK,MALT1,EVI2B,FES,IL23R,CREB1,PRKCZ,SOS2,CLPTM1,RARA,BTK,NOTCH2,…
GO:BP	regulation of lymphocyte proliferation	GO:0050670	FALSE	0.000005246640760419872	5.280118671099629	237	6042	111	21026	IKZF3,HLA-DPB1,ARG1,XCL1,FCRL3,IRS2,CR1,CD3E,CASP3,INPP5D,VAV3,PTPRC,CD300A,TRAF6,TNFRSF14,JAK2,STAT5B,CD46,LYN,TYROBP,CD6,FADD,BID,GPR183,FOXJ1,MZB1,CCDC88B,PYCARD,TLR9,CTNNB1,EBI3,FCGR3A,IL10,LILRB4,TLR4,CD28,FOXP3,SLC7A1,CEBPB,HMGB1,ZNF335,DNAJA3,SYK,PRKAR1A,TNFRSF13B,IL1B,CD22,IL23R,SOS2,IGF1,MNDA,BTK,ANXA1,CARD11,SLC4A2,CDKN1A,SLC39A10,ICOSLG,CD40LG,LGALS3,LILRB2,CBLB,TGFBR2,ATM,TNFRSF13C,SH…
GO:BP	regulation of endocytosis	GO:0030100	FALSE	0.000005505451339283023	5.2592070715832016	297	6042	133	21026	PTX3,EGF,NRG1,SIRPA,TLR2,ITGB3,AZU1,CLU,ABCA13,HIP1,SPHK1,F2RL1,CD177,MCTP1,DNAJC6,CD63,TOR1A,ARPC3,CDC42,ROCK1,PTPRC,TSG101,VAC14,PICALM,CD300A,PLCG2,CLIP3,MKLN1,VEGFA,FGR,LDLRAP1,RAB21,LRRK2,PYCARD,MYO18A,B2M,LRSAM1,RAB27A,ATXN2,ZFYVE16,NCDN,RUFY2,CYBA,HMGB1,BTBD9,SYK,PPP3R1,ATG5,CD22,ANKRD13D,CD151,CFP,RIN3,SNX3,LRPAP1,SDCBP,ATG3,USP6,CD36,SPACA3,BIN1,HNRNPK,CNN2,RAB31,NR1H3,BTK,FMR1,NUMB,GPC3…
GO:BP	RNA localization	GO:0006403	FALSE	0.000005531904018970369	5.257125363702487	200	6042	97	21026	CCT2,XPO1,THOC1,ZNHIT3,YY1,SEC13,AAAS,KPNB1,RAE1,YTHDC1,TOMM20L,RBM8A,UPF1,MVP,ZFP36L1,ENY2,SUPT6H,THOC6,NOP10,NUP210,STAU2,NUP160,THOC7,SMG6,BICD2,TNKS,FXR1,SETD2,SIDT1,ATXN2,EIF4A3,NUP153,QKI,NUP62CL,NUP214,PUM2,AGFG1,ZC3H11A,DHX9,DDX39B,NUP50,FMR1,PEG10,XPOT,TST,KIF5C,NUTF2,GLE1,SARNP,TGFBR2,BICD1,ATM,RANBP17,SHFM1,CKAP5,HSF1,HHEX,TPR,SIDT2,NUP43,SMG5,NXT1,UPF3A,DDX19A,IGF2BP1,NUP155,CCT7,XPO5…
GO:BP	positive regulation of developmental process	GO:0051094	FALSE	0.000005883968265377876	5.230329678264093	1343	6042	482	21026	RETN,HK2,IL7R,IGF1R,VCAN,LTF,VEGFC,BCL7A,CSRP3,HAX1,ALOX15B,CEBPA,FGF9,TGFBR3,MAML1,TNFSF13,EGF,SHTN1,CAMP,RHOH,NRG1,TCF4,S100B,EPHA4,TLR2,CYFIP1,CYP1B1,THBS1,B4GALT5,MAPK14,CD83,ITGB3,HSP90AB1,CR1,INHBA,TBX21,C3AR1,SEMA4A,HPSE,SLC7A5,SPHK1,SOX6,AQP1,ADM,MYC,CD101,HAPLN2,TNFSF12,CD27,OLFM2,PAFAH1B1,VEZF1,NFKBID,RTN4,ARID1A,LTBP3,KDM4A,SERP1,INPP5D,PDGFB,SAP30,ITGB2,SAP130,PTPRC,TGFBR1,MECP2,ZMIZ1…
GO:BP	positive regulation of transcription by RNA polymerase II	GO:0045944	FALSE	0.000006162053579310825	5.210274529794172	1256	6042	454	21026	MAFG,IKZF3,RORA,KLF12,FZD5,CSRP3,HAX1,EOMES,CEBPA,MAML1,DDX17,SKAP1,TCF4,TLR2,MAPK14,ZNF473,INHBA,TBX21,CARF,NHLH1,NR1D2,F2RL1,ZNF319,CEBPE,GFI1B,MED21,MYC,STAT4,PLAGL1,TFEB,ACTR2,GSK3A,TAF12,ELF4,KLF13,ACTR3,RLF,CTBP2,CDK7,YY1,FLI1,VEZF1,TP53,CHUK,ZNF507,LMO7,SERTAD1,HDAC3,IER2,GPBP1,EPAS1,CRTC2,HMGA1,GTF2A1,SUPT4H1,RARG,BCL2L12,MECP2,ZMIZ1,SP3,KLF2,RHOQ,ZNF580,MED13,ARF4,RB1,HCFC1,MEN1,VEGFA,RB…
GO:BP	cell division	GO:0051301	TRUE	0.0000065731904451049855	5.1822237847194765	658	6042	258	21026	IGF1R,VEGFC,MIS18A,FGF9,CENPJ,MTMR3,CDCA8,INSC,MYC,ACTR2,ACTR3,CALM2,CDK7,DR1,CDC42,PIK3C3,TADA3,PAFAH1B1,ANAPC11,PLEC,MAPRE1,RAD21,CUL3,USP39,GNAI2,APC,ROCK1,RAE1,MCMBP,SMYD5,SH3GLB1,EXOC6,PDGFB,GNAI3,TSG101,DIS3L2,CHMP2A,RB1,ARL8A,VEGFA,CDC14A,LZTS2,CHMP3,DYNLT1,SEPT6,IQGAP1,CHMP1B,NUMA1,JTB,NR3C1,MICAL3,OPN1MW,KNTC1,RAB10,PKN2,CENPW,LBH,ANAPC13,CNTROB,RAB35,EPB41,SNX18,VPS4B,SPAST,CHMP7,ING2,E…
GO:BP	positive regulation of molecular function	GO:0044093	FALSE	0.000006838976228143216	5.165008905845003	884	6042	333	21026	IRAK3,CACNB2,PYHIN1,S100A12,LTF,ASPH,ELANE,ADORA3,EGF,MMP9,NRG1,EPHA4,TLR2,THBS1,MAPK14,ITGB3,CLU,CR1,IRGM,SPHK1,F2RL1,SH3BP1,GSK3A,CALM2,MARK3,YWHAB,CHUK,TBC1D2,ROCK1,TAOK3,DOCK9,GSTM2,CRTC2,SNX13,USP33,PDGFB,ITGB2,TOR1AIP2,PTPRC,SPDYE2,TERF2,DAZAP2,TOR1AIP1,ATP7A,PLCG2,PDCD10,MAP3K5,GRN,TAB2,RB1,SERINC1,SLCO3A1,TRAF6,ABR,MID1IP1,TXN,RAP1A,SP100,IQGAP1,ARID5B,JTB,NDEL1,JAK2,HDAC2,XRCC4,LYN,FGFR4…
GO:BP	cell migration	GO:0016477	FALSE	0.000007751480369735686	5.11061534845992	1534	6042	542	21026	GPR18,GRB10,APCDD1,CEACAM6,IGF1R,VCAN,S100A12,EVL,GADD45A,VEGFC,EOMES,ALOX15B,CDK5R1,ELANE,FGF9,TRPM2,RAB13,TGFBR3,ADORA3,XCL1,CLIC4,ITGA2B,EGF,HSD3B7,MMP9,SHTN1,FUT8,SIRPA,KIAA0319,CXCR6,EPHA4,CYP1B1,IRS2,THBS1,SELP,ITGB3,AZU1,GP1BA,TBX21,C3AR1,SEMA4A,IL1R1,SPHK1,MPP1,AQP1,S100P,F2RL1,DOCK4,DPP4,ITGB5,NTNG2,SH3BP1,CD177,PF4V1,SCAI,PTPRK,PLA2G7,TNFAIP6,RRAS2,MCTP1,CCR5,CTSG,CD63,TOR1A,GSK3A,MIIP,…
GO:BP	secretion	GO:0046903	FALSE	0.000007904915574541156	5.10210276402484	992	6042	368	21026	RETN,HK2,PFKFB2,STX17,FCER1A,SYTL2,VEGFC,RAB13,ABAT,ADORA3,CES1,EGF,FAM3B,SYP,NRG1,TLR2,IRS2,INHBA,ATP7B,SUCNR1,AQP1,GAB2,F2RL1,CD177,SLC22A16,MCTP1,LAMP1,OLFM2,PAFAH1B1,GNAI2,SERP1,PCSK5,PNPLA8,EXOC6,STXBP3,ITGB2,KCNQ1,TSG101,TMEM167A,CAD,DNAJC5,MECP2,HGS,CD300A,PTPN23,CHMP2A,ATP7A,RAP1B,MIDN,VEGFA,BLOC1S3,ARFGEF1,UCP2,ALOX5,TSPO,HPS6,ANK1,CAMK2G,FGR,RAP1A,MED1,TMEM63A,ENY2,RAB7A,CYB5R4,ADAM8,SN…
GO:BP	peptidyl-amino acid modification	GO:0018193	FALSE	0.000007986023217697187	5.097669431519202	686	6042	267	21026	TPST1,PLOD2,IGF1R,TTC36,GADD45A,HAX1,ASPH,CDK5R1,GALNT11,EGF,HINT1,NRG1,ZDHHC19,EPHA4,MAPK14,ITGB3,NMT2,IRGM,SPHK1,GSK3A,CALM2,MARK3,ZDHHC3,TP53,CD3E,NAA60,ROCK1,UBE2K,PDGFB,ITGB2,PTPRC,TOLLIP,TSG101,CAD,TGFBR1,ZMIZ1,SENP3,ATP7A,PLCG2,PDCD10,CLIP3,ZDHHC20,FNIP1,VEGFA,TNFRSF14,TXN,MAP4K1,SETD3,MVP,FGR,HYAL2,ABI2,LTK,JAK2,TRIM28,GALNT1,SUMO1,HDAC2,LYN,SNX6,FGFR4,LRRK2,DYRK1A,RIPK1,BAG4,HCLS1,HDAC4,…
GO:BP	negative regulation of intrinsic apoptotic signaling pathway	GO:2001243	FALSE	0.000007995189122866055	5.097171258741301	105	6042	59	21026	MMP9,CLU,GRINA,HERPUD1,HYOU1,TMBIM6,CDKN2D,LRRK2,Q16594,BID,PTTG1IP,HSPA1A,ING2,CTNNB1,CD44,IL10,SYVN1,RRN3,RTKN2,GPX1,TXNDC12,TAF9B,PINK1,TRAP1,PYCR1,ARMC10,PARL,ELL3,HSPB1,IVNS1ABP,PLAUR,NONO,WNT1,NOL3,PDX1,AKT1,ATAD5,PTGS2,VDAC2,HDAC1,MAPK7,PTPN1,NOC2L,BAG5,ENO1,SIRT1,PARK2,CXCL12,WFS1,SNAI1,TRIM32,KDM6A,MAPK8IP1,TMEM161A,PPIA,ZNF385A,PARK7,RACK1,CREB3
GO:BP	regulation of translation	GO:0006417	FALSE	0.00000876339507497587	5.057327608823242	380	6042	162	21026	TRIM71,EPHA4,PIWIL4,CYFIP1,CYP1B1,THBS1,MRPL13,RPS27L,GUF1,EIF5A2,FECH,MYC,EIF1,GTDC1,RNF139,CSDE1,PPP1R15B,EIF4EBP2,TNRC6A,YTHDF3,SERP1,EIF4H,EIF1B,RBM8A,UPF1,MKNK2,LSM14B,ZFP36L1,MCTS1,NSUN5,EIF4E2,CNOT3,FOXO3,DAPK3,DNAJC3,PELO,FXR1,ATXN2,EIF4A3,CD28,PAIP2,QKI,RBM4,OGFOD1,GIGYF2,RPS6KB2,IREB2,LSM14A,MSI2,PIWIL2,MTG1,PUM2,CNOT6,RPL10,TMED2,CAPRIN2,DHX9,SAMD4B,APP,ILF3,RPL13A,RPUSD3,CNOT2,RARA,EE…
GO:BP	regulation of leukocyte mediated immunity	GO:0002703	FALSE	0.00000888705707013593	5.051242030907962	255	6042	117	21026	KLRB1,SH2D1A,IL7R,FZD5,ARG1,CD1C,TNFSF13,XCL1,CLEC12B,CR1,TBX21,IL1R1,GAB2,F2RL1,CD177,KLRC4,LAMP1,TNFSF12,ITGB2,PTPRC,CD300A,PLCG2,TRAF6,EXOSC3,FGR,SUPT6H,STAT5B,C4BPA,CD46,LYN,TYROBP,FADD,STX4,LTA,FOXJ1,TLR9,B2M,CX3CR1,ITGAM,IL10,LILRB4,TLR4,CD28,FOXP3,HMGB1,EXOSC6,SYK,IL1B,MALT1,VAV1,PMS2,FES,IL23R,PRKCZ,FCER2,BTK,PRKAA1,BCR,MR1,STX7,SECTM1,PRAM1,MAP3K7,CD7,DNASE1L3,AP1G1,IL18,KLHL22,SH2D1B,CL…
GO:BP	positive regulation of response to external stimulus	GO:0032103	FALSE	0.00000893742895195463	5.048787397598885	642	6042	252	21026	MMP8,IRAK3,SH2D1A,PYHIN1,IGF1R,ARG1,S100A12,LTF,VEGFC,CEBPA,CLEC4E,XCL1,TLR2,FCRL3,THBS1,AZU1,C3AR1,IRGM,SUCNR1,F2RL1,RNF135,NAIP,PLA2G7,KLRC4,LAMP1,ZDHHC3,PPP6C,UFD1L,CHUK,RTN4,UBE2K,CASP3,MGST2,PDGFB,MFHAS1,UBQLN1,TRIM41,CD300A,ZNF580,PLCG2,F7,GRN,VEGFA,TRAF6,NFKBIA,HYAL2,MED1,SARM1,ADAM8,HMGB2,ETS1,RIOK3,TLR8,TAX1BP1,STAT5B,CCR6,LYN,TYROBP,PIK3CG,LRRK2,IRF3,IRF4,MOSPD2,FADD,STX4,PTGER4,LTA,RIP…
GO:BP	positive regulation of leukocyte cell-cell adhesion	GO:1903039	FALSE	0.000009322504480957109	5.030467399218521	277	6042	125	21026	IL7R,HLA-DPB1,HSPH1,ELANE,XCL1,SKAP1,RHOH,SIRPA,CD83,SELP,GP1BA,CR1,DPP4,CD27,CD3E,NFKBID,ARID1A,ITGB2,PTPRC,ZMIZ1,TRAF6,ALOX5,TNFRSF14,ADAM8,ETS1,JAK2,FCHO1,PIK3CA,STAT5B,CD46,LYN,FOXO3,CD6,FADD,CCDC88B,PYCARD,CD5,EBI3,B2M,CD44,LILRB4,BRD4,CD28,FOXP3,SLC7A1,HLA-DRB5,HMGB1,SMARCD3,DNAJA3,SYK,IL1B,MALT1,PTPN11,VAV1,IL23R,PRKCZ,IGF1,RARA,PRKAA1,ANXA1,CARD11,ACTB,SMARCD1,ICOS,ICOSLG,CHST2,CD40LG,AP3…
GO:BP	regulation of innate immune response	GO:0045088	FALSE	0.000009541762683990911	5.02037138910961	449	6042	186	21026	IRAK3,KLRB1,SH2D1A,PYHIN1,ARG1,LTF,CLEC4E,CLEC12B,TLR2,FCRL3,CR1,IRGM,SERPING1,F2RL1,RNF135,NAIP,KLRC4,LAMP1,ZDHHC3,PPP6C,UFD1L,CHUK,RTN4,UBE2K,YTHDF3,MFHAS1,UBQLN1,TRIM41,CD300A,PLCG2,USP38,GRN,TRAF6,FGR,NFKBIA,MED1,SARM1,ADAM8,HMGB2,RIOK3,TLR8,TAX1BP1,STAT5B,EIF4E2,LYN,TYROBP,IRF3,IRF4,FADD,ATG12,PYCARD,HSPA1A,XIAP,TLR9,PAK2,BANF1,NR1H4,TLR4,NINJ1,PAK1,NR1D1,NMI,TLR1,CYBA,SMPDL3A,TRIM25,HMGB1,G…
GO:BP	cellular response to lipopolysaccharide	GO:0071222	FALSE	0.000009808337655026802	5.008404591847805	215	6042	102	21026	MMP8,IRAK3,BPI,LTF,DEFA4,MMP9,CAMP,SIRPA,TLR2,MAPK14,IRGM,SLC7A5,PF4V1,CEBPE,CCR5,CMPK2,CTSG,PLSCR3,TRIM41,PLCG2,UPF1,PRPF8,TRAF6,TSPO,NFKBIA,HMGB2,JAK2,NLRP7,VIM,LYN,IRF3,CD6,CARD16,PYCARD,TLR9,MAP2K3,CX3CR1,IL10,NR1H4,TLR4,CDK19,NR1D1,CXCL2,CXCL1,HMGB1,IL1B,MALT1,LY96,MTDH,GSTP1,MAPK1,CD36,RARA,NR1H3,CDK4,CASP1,CD180,BCR,HADHB,SPON2,TNIP1,LILRB2,PRDX2,ABL1,HCK,PDCD4,CHMP5,HSF1,PF4,CX3CL1,SCIMP,…
GO:BP	leukocyte mediated immunity	GO:0002443	FALSE	0.000009932641667535696	5.0029352319619775	481	6042	197	21026	KLRB1,SH2D1A,IL7R,DAO,FZD5,FCER1A,ARG1,C1RL,ELANE,CD1C,CD8A,TNFSF13,XCL1,CLEC12B,BTN3A2,AZU1,CLU,CR1,TBX21,IL1R1,SERPING1,SLAMF7,GAB2,F2RL1,CD177,KLRC4,CTSG,LAMP1,TNFSF12,CD27,KIF5B,INPP5D,IGLL5,STXBP3,ITGB2,PTPRC,IGLL1,TUSC2,CD300A,PLCG2,TRAF6,EXOSC3,FGR,SUPT6H,LYST,TLR8,STAT5B,C4BPA,CCR6,CD46,LYN,TYROBP,PIK3CG,FADD,STX4,LTA,FOXJ1,TLR9,FCGR3A,B2M,CX3CR1,ITGAM,IL10,LILRB4,TLR4,RAB27A,CD28,TRAF3IP…
GO:BP	organophosphate biosynthetic process	GO:0090407	FALSE	0.000010134112984319954	4.994214258107991	619	6042	244	21026	NME7,NDUFS4,MBOAT2,TTC7B,AK3,PDK4,G6PD,MTMR3,CMPK2,BMX,DGKA,NDUFB1,LPGAT1,ISYNA1,PIK3C3,GMPR2,NDUFA1,NDUFB4,AGPAT2,PIGS,PLSCR3,NDUFA2,NDUFB3,INPP5D,MTMR14,LCAT,PDGFB,SGMS1,CAD,VAC14,FPGT,NDUFB6,NANS,PLCG2,AK8,SERINC1,IMPDH1,NPR2,PIGU,ND5,LPCAT4,TBPL1,ATP6V0C,PIK3CA,ATP6,ATP5J,SLC44A1,PIK3CG,PIGL,PPIP5K1,NMNAT1,PIP4K2C,FAR1,TKT,SDHB,PLA2G6,DPM1,MTMR4,NR1H4,PTEN,UXS1,SLC27A1,PIGT,SDHD,PLEK,LPCAT3,I…
GO:BP	regulation of mononuclear cell proliferation	GO:0032944	FALSE	0.000010370490883924057	4.984200685931712	242	6042	112	21026	IKZF3,HLA-DPB1,ARG1,XCL1,FCRL3,IRS2,CR1,CD3E,CASP3,INPP5D,VAV3,PTPRC,CD300A,TRAF6,TNFRSF14,JAK2,STAT5B,CD46,LYN,TYROBP,CD6,FADD,BID,GPR183,FOXJ1,MZB1,CCDC88B,PYCARD,TLR9,CTNNB1,EBI3,FCGR3A,IL10,LILRB4,TLR4,CD28,FOXP3,SLC7A1,CEBPB,HMGB1,ZNF335,DNAJA3,SYK,PRKAR1A,TNFRSF13B,IL1B,CD22,IL23R,SOS2,IGF1,MNDA,CNN2,BTK,ANXA1,CARD11,SLC4A2,CDKN1A,SLC39A10,ICOSLG,CD40LG,LGALS3,LILRB2,CBLB,TGFBR2,ATM,TNFRSF1…
GO:BP	positive regulation of proteolysis	GO:0045862	FALSE	0.000010883212077582318	4.9632429077912885	218	6042	103	21026	PYHIN1,CLEC3B,ASPH,CEBPA,EGF,TRIB2,EPHA4,CLU,CR1,GSK3A,HERPUD1,RNF139,PSMC1,UBQLN1,ZER1,GRN,ADAM8,TMX1,SUMO1,HDAC2,TRAF7,LYN,FGFR4,LRRK2,FADD,HSPA1A,SEMG1,USP13,CAPN3,TANK,CYFIP2,PTEN,FBXW11,APH1B,F12,MBP,CBFA2T3,IL1B,AGTPBP1,PLK1,PRSS22,RFPL1,GSK3B,BTRC,FMR1,PINK1,VCP,AURKAIP1,SH3RF1,UBQLN2,GABARAP,PRICKLE1,FBXW7,RCHY1,CHFR,TGFB1I1,AKT1,ANXA2,MAGEF1,HSPBP1,VSIR,TF,CCDC22,PSMC4,ENO1,PSMC3,CLN6,GB…
GO:BP	small GTPase-mediated signal transduction	GO:0007264	FALSE	0.00001145538832664479	4.940990184059877	505	6042	205	21026	GPR18,SIPA1L2,GPR174,SH2B2,FGD4,SHTN1,RHOH,CYFIP1,RASGEF1B,RAB30,F2RL1,SIAH2,DOCK4,SH3BP1,SCAI,RRAS2,GNB1,RGS19,CDC42,BRK1,TP53,ARHGAP1,CUL3,RTN4,GIT2,ROCK1,DOCK9,SH2D3C,DOK1,VAV3,ARHGAP26,PREX1,PLEKHG3,PICALM,TNFAIP1,STK19,RHEB,RHOQ,RAP1B,RB1,RAB18,STMN3,ARFGEF1,ARHGAP27,ABR,SH2D3A,GNA13,RAP1A,FBP1,ABI2,OBSCN,RAB21,PIK3CG,LRRK2,RAB35,DENND1A,MCF2L,RAPGEF2,PLEKHG4,RALB,RABL3,CCDC125,RIT1,RHOF,ARH…
GO:BP	vesicle-mediated transport in synapse	GO:0099003	FALSE	0.00001553986485820522	4.808552762342759	257	6042	117	21026	CDK5R1,NSG1,SYP,NRG1,CYFIP1,ITGB3,ABCA13,HIP1,DNAJC6,TOR1A,CALM2,ARPC3,ATP6V1D,PIK3C3,GIT2,ROCK1,CASP3,PRKAR1B,DNAJC5,VAC14,PICALM,MKLN1,RAP1B,ATP6AP1,RAP1A,ATP6V1C1,RAB7A,ATP6AP2,ATP6V0C,VPS18,LRRK2,C9ORF72,DENND1A,CTNNB1,CTBP1,AP2B1,AP3M2,PTEN,OSBPL2,ATP6V1E1,PRRT2,GRIPAP1,RAB5A,NCDN,SLC17A5,BTBD9,PPP3R1,AP3S1,FCHO2,ATP6V1A,WNT7A,CLTA,USP6,ATP6V0A1,BIN1,FMR1,NUMB,FBXL20,STX3,STXBP5,RAB3A,ACTB,S…
GO:BP	protein maturation	GO:0051604	FALSE	0.000016048378021118	4.794568854354065	539	6042	216	21026	FKBP5,CCT2,CLEC3B,HSPH1,C1RL,PRKACB,FKBP9,THBS1,ITGB3,HSP90AB1,GZMA,GP1BA,IL1R2,CLU,F13A1,ASPRV1,DPP4,PLA2G7,GP1BB,CTSG,TOR1A,PCSK7,HYOU1,RNF139,NAA60,PIGS,PRCP,CASP3,RP2,TTC1,PCSK5,DNAJC5,DNAJA2,CCDC47,TMEM208,ZMPSTE24,F7,CLPX,GRN,SEC11A,MVP,PIGU,SDF2,UGGT1,ADAM8,TXNDC5,ATP6AP2,NLRP7,HSPA1L,LRRK2,DDI2,BAG4,NAA50,CASP4,PIGL,HSPA1A,DNAJC3,B2M,NFYC,YME1L1,DPM1,QSOX2,PIGT,APH1B,F12,RCE1,HSPA6,POFUT2…
GO:BP	phagocytosis	GO:0006909	FALSE	0.00001694385696490155	4.77098772340846	241	6042	111	21026	PTX3,ELANE,MARCO,RHOH,SIRPA,TLR2,THBS1,PEAR1,ITGB3,AZU1,SPHK1,F2RL1,SH3BP1,CEBPE,CDC42,VAV3,ITGB2,PTPRC,TUSC2,CD300A,PLCG2,FGR,RAB7A,CD302,LYST,NCF2,PIK3CA,C4BPA,LYN,TYROBP,PYCARD,PLD4,MYO18A,PLA2G6,ITGAM,XKR8,TLR4,CEACAM4,PAK1,RAB27A,RAB5A,CYBA,ARL8B,HMGB1,LEPR,RAB34,SYK,MFGE8,ICAM5,ATG5,VAV1,CFP,SNX3,ATG3,CD36,SPACA3,JMJD6,RARA,CNN2,RAB31,NR1H3,BTK,ANXA1,FCGR2A,BCR,SPON2,RAB20,C14ORF133,ABL1,HC…
GO:BP	regulation of MAPK cascade	GO:0043408	FALSE	0.000017172556365161547	4.765165049472509	637	6042	249	21026	IRAK3,NDST1,IGF1R,S100A12,GADD45A,TNIK,ELANE,FGF9,EGF,MARCO,NRG1,SIRPA,EPHA4,FCRL3,THBS1,DUSP5,ITGB3,INHBA,SPHK1,F2RL1,NAIP,PDE6H,MYC,LAMTOR2,CDC42,CD27,PAFAH1B1,MINK1,EIF3A,GNAI2,HDAC3,MAP3K3,ROCK1,TAOK3,DOK1,PDGFB,PTPRC,SLA,MFHAS1,NBR1,CD300A,RNF13,PLCG2,PDCD10,MAP3K5,GLIPR2,RAP1B,MEN1,VEGFA,TRAF6,MAP4K1,RAP1A,HYAL2,IQGAP1,ADAM8,ATP6AP2,JAK2,RELL2,TRAF7,GADD45B,MAP2K4,LYN,FGFR4,RET,PIK3CG,LRRK2…
GO:BP	mitotic cell cycle process	GO:1903047	FALSE	0.000017471161580643355	4.757678219728381	745	6042	285	21026	BCL7A,TRIM71,EGF,CENPJ,GEN1,HECW2,RPS27L,INHBA,ABRAXAS1,SPHK1,MTMR3,GFI1B,ABCB1,CDCA8,INSC,MYC,UBE2A,WAC,CTDSP1,CALM2,CDK7,MIIP,PPP6C,CDC42,PAFAH1B1,ANAPC11,TP53,MTA3,MAPRE1,CCNH,RAD21,CUL3,AAAS,ARID1A,HDAC3,APC,KPNB1,BROX,ROCK1,TAOK3,RAE1,ZC3H12D,EXOC6,PDGFB,KIFC2,PPM1D,CDKN2D,TUBG2,DIS3L2,CHMP2A,ZMPSTE24,RB1,CDC14A,LZTS2,CHMP3,DYNLT1,SEPT6,ZFP36L1,IQGAP1,CHMP1B,NUMA1,JTB,NDEL1,SYF2,KNTC1,CTDSP2…
GO:BP	cellular response to molecule of bacterial origin	GO:0071219	FALSE	0.000017902655037806774	4.747082556575297	225	6042	105	21026	MMP8,IRAK3,FZD5,BPI,LTF,DEFA4,MMP9,CAMP,SIRPA,TLR2,MAPK14,IRGM,SLC7A5,PF4V1,CEBPE,CCR5,CMPK2,CTSG,PLSCR3,TRIM41,PLCG2,UPF1,PRPF8,TRAF6,TSPO,NFKBIA,HMGB2,JAK2,NLRP7,VIM,LYN,IRF3,CD6,CARD16,PYCARD,TLR9,MAP2K3,CX3CR1,IL10,NR1H4,TLR4,CDK19,NR1D1,CXCL2,TLR1,CXCL1,HMGB1,IL1B,MALT1,LY96,MTDH,GSTP1,MAPK1,CD36,RARA,NR1H3,CDK4,CASP1,CD180,BCR,HADHB,SPON2,TNIP1,LILRB2,PRDX2,ABL1,HCK,PDCD4,CHMP5,HSF1,PF4,CX3…
GO:BP	myeloid leukocyte activation	GO:0002274	FALSE	0.00001839470325499232	4.735307213853995	244	6042	112	21026	MMP8,RORA,FCER1A,S100A12,BPI,CEBPA,CAMP,RHOH,TLR2,THBS1,AZU1,CLU,IRGM,SUCNR1,SPHK1,GAB2,F2RL1,CD177,CTSG,STXBP3,ITGB2,PTPRC,MFHAS1,PREX1,CD300A,PLCG2,GRN,RBPJ,TRAF6,FGR,HYAL2,JAK2,LYN,TYROBP,PIK3CG,LRRK2,IRF4,CAMK4,STX4,PYCARD,TLR9,MYO18A,TRPV1,FCGR3A,CX3CR1,ITGAM,IL10,LILRB4,IFNGR1,TLR4,CRTC3,NR1D1,NMI,TRAF3IP2,TLR1,HMGB1,SYK,FES,RELB,CLEC4D,APP,SPACA3,JMJD6,FCER2,NR1H3,BTK,NOTCH2,ANXA1,BCR,CXCR…
GO:BP	TOR signaling	GO:0031929	FALSE	0.000018414890758512998	4.734830853139002	167	6042	83	21026	RRAGD,PRKACB,GSK3A,WAC,LAMTOR2,SEC13,CUL3,SZT2,HDAC3,EIF4EBP2,RHEB,ZMPSTE24,F7,FNIP1,WDR59,UBE2W,PDCD6,PIK3CA,RRAGA,USP4,C9ORF72,STAMBPL1,LAMTOR3,RFFL,SYAP1,SAR1A,NPC1,RPS6KB2,SYK,YWHAZ,TMEM127,GSK3B,UBR2,PRKAA1,PIM1,RRAGC,PINK1,CARD11,TBK1,SIK3,SESN1,ATM,SRMS,SAR1B,KLHL22,MFSD8,ITFG2,SESN2,TSC1,PELI1,TBCK,YWHAG,DGKQ,AKT1,DEPDC5,SH3BP4,CTNS,GATA3,USP32,NCKAP1L,GBA,SIRT1,MTM1,UBR1,MAPKAP1,RRAGB,EI…
GO:BP	small molecule biosynthetic process	GO:0044283	FALSE	0.000018841953258326738	4.72487407790501	593	6042	234	21026	PLOD2,PTS,PLTP,PRKAB2,ABCD2,ALOX15B,ABAT,OLAH,CES1,MPO,HSD3B7,TBXAS1,INHBA,SPHK1,PTGS1,ABCD1,NAIP,PDK4,G6PD,AKR1C3,ADM,LPGAT1,ISYNA1,CYB5R3,GSTM2,CRTC2,MGST2,PNPLA8,PGM2,CAD,NANS,CYP27A1,PLCG2,DEGS1,SIK1,ALOX5,MID1IP1,OSBPL1A,FBP1,NR3C1,SEPHS2,GSTM1,CHST15,FGFR4,PFKFB1,PPIP5K1,PYCARD,PGD,GGT7,KAT2A,LBR,NR1H4,ENO3,TM7SF2,OSBPL2,NR1D1,PLEK,SERINC3,LPCAT3,HSD17B8,SERINC5,QKI,LEPR,PGM1,BMP2,SYK,OSBP,…
GO:BP	regulation of intracellular transport	GO:0032386	FALSE	0.000019303892462522542	4.714355110445683	266	6042	120	21026	XPO1,ASPH,MAPK14,IFI27,LAMP1,CDC42,RNF139,ARHGAP1,AAAS,HDAC3,TMEM30A,EDEM1,REEP5,MECP2,TNNC1,PTPN23,PDCD10,CHMP3,PPP1R12A,TXN,SP100,HYAL2,NUMA1,SUPT6H,NDEL1,JAK2,TRIM28,SUMO1,ARFIP1,LDLRAP1,RAB21,LRRK2,EHD1,OAZ1,HCLS1,UBE2J1,MTMR4,SAR1A,XPO4,SETD2,FRAT1,GRIPAP1,NUP153,RBM4,ATP13A2,IER3,TRIM46,FRAT2,IL1B,RAB11B,NUP214,EMD,PTPN11,SNX3,MLC1,LCP1,MAPK1,SMAD3,DHX9,KIF20B,CD36,YOD1,GSK3B,CRYAA,DERL3,SN…
GO:BP	tumor necrosis factor-mediated signaling pathway	GO:0033209	FALSE	0.00002217586013573746	4.654119526176737	112	6042	61	21026	MMP8,SPHK1,F2RL1,NAIP,TP53,CHUK,UBE2K,SHARPIN,KRT18,TRAF6,TNFRSF14,NFKBIA,JAK2,RRAGA,FOXO3,PYDC1,CARD16,HIPK1,RIPK1,CASP4,PYCARD,HSPA1A,XIAP,RFFL,TANK,TNFRSF19,NR1H4,TRAF3IP2,TNFRSF25,SYK,TNFRSF17,SPATA2,TMSB4X,GSTP1,AIM2,NSMAF,IKBKB,KRT8,FAS,TRAF1,CASP1,DICER1,TNFRSF13C,SPPL2A,TNFRSF4,NOL3,LIMS1,GPS2,MIB2,EXT1,TNFRSF18,CD70,TNFSF18,TRAF2,APOA1,MAPKAPK2,PARK2,TRIM32,PIAS4,PIAS3,TRAIP
GO:BP	positive regulation of immune effector process	GO:0002699	FALSE	0.000023559826869950625	4.627827905298406	264	6042	119	21026	SH2D1A,FZD5,ARG1,CD1C,TNFSF13,XCL1,CR1,TBX21,IL1R1,SLC7A5,GAB2,F2RL1,CD177,KLRC4,LAMP1,TNFSF12,NFKBID,RTN4,ITGB2,PTPRC,CD300A,PLCG2,TRAF6,EXOSC3,TNFRSF14,FGR,STAT5B,CD46,TYROBP,FADD,STX4,LTA,MZB1,PYCARD,TLR9,MYO18A,B2M,ITGAM,IL10,BRD4,TLR4,CD28,FOXP3,EXOSC6,SYK,IL1B,MALT1,VAV1,CFP,PMS2,IL23R,PRKCZ,CD36,RARA,FCER2,BTK,PRKAA1,ANXA1,LACC1,SPON2,MR1,STX7,SECTM1,MAP3K7,PGC,CD7,AP1G1,IL18,KLHL22,SH2D1B…
GO:BP	actin cytoskeleton organization	GO:0030036	FALSE	0.000023974551130028402	4.620249515276242	729	6042	279	21026	EVL,CSRP3,HAX1,TNIK,PSTPIP2,CDK5R1,PGM5,TRPM2,RAB13,SH2B2,FGD4,MYL9,TNNT1,SHTN1,RHOH,CYFIP1,ITGB3,HIP1,AQP1,F2RL1,ITGB5,SH3BP1,ACTR2,ACTR3,ARPC2,ARPC3,CDC42,MARCKSL1,SPTAN1,BRK1,PAFAH1B1,DIAPH1,PLEC,MINK1,CAPZA1,CUL3,ROCK1,PXN,SPECC1,NEB,ARHGAP26,TGFBR1,PREX1,TNFAIP1,ARPC5,RHOQ,SSH1,MYO5A,MKLN1,FSCN1,ARFGEF1,VASP,SETD3,IQGAP1,ABI2,JAK2,TPM4,OBSCN,PIK3CA,MICAL3,GMFB,ARFIP1,TYROBP,CAP1,DAPK3,STAU2,…
GO:BP	regulation of phosphorylation	GO:0042325	FALSE	0.00002786099067687762	4.555003445060228	830	6042	312	21026	GRB10,IRAK3,TTC36,S100A12,GADD45A,LTF,HAX1,TNIK,NDUFS4,CDK5R1,ELANE,FGF9,EGF,TRIB2,MMP9,NRG1,SIRPA,EPHA4,IRS2,THBS1,ITGB3,INHBA,IRGM,SPHK1,FECH,GSK3A,CTDSP1,CALM2,TADA3,TP53,CD3E,SERTAD1,PPP1R15B,HDAC3,APC,UBE2K,TAOK3,PRKAR1B,PDGFB,ITGB2,PTPRC,SPDYE2,TSG101,CDKN2D,HGS,CD300A,BRAT1,PLCG2,WDFY2,PDCD10,MAP3K5,CLIP3,TAB2,FNIP1,RB1,MIDN,MEN1,VEGFA,SLCO3A1,TRAF6,TNFRSF14,TXN,MVP,FGR,RAP1A,HYAL2,IQGAP1,…
GO:BP	positive regulation of T cell activation	GO:0050870	FALSE	0.000030511724731893553	4.515533242361747	254	6042	115	21026	IL7R,HLA-DPB1,HSPH1,XCL1,RHOH,SIRPA,CD83,CR1,DPP4,CD27,CD3E,NFKBID,ARID1A,PTPRC,ZMIZ1,TRAF6,TNFRSF14,ADAM8,JAK2,FCHO1,PIK3CA,STAT5B,CD46,LYN,FOXO3,CD6,FADD,CCDC88B,PYCARD,CD5,EBI3,B2M,LILRB4,BRD4,CD28,FOXP3,SLC7A1,HLA-DRB5,HMGB1,SMARCD3,DNAJA3,SYK,IL1B,MALT1,PTPN11,VAV1,IL23R,PRKCZ,IGF1,RARA,PRKAA1,ANXA1,CARD11,ACTB,SMARCD1,ICOS,ICOSLG,CD40LG,AP3B1,LILRB2,IL1RL2,TGFBR2,TNFRSF13C,EPHB6,IL18,DOCK8,…
GO:BP	regulation of anatomical structure morphogenesis	GO:0022603	FALSE	0.00003206916189559286	4.493912389896177	831	6042	312	21026	HK2,APCDD1,GADD45A,VEGFC,TNIK,CDK5R1,EGF,FGD4,SHTN1,CAMP,RHOH,KIAA0319,EPHA4,CYFIP1,CYP1B1,THBS1,ITGB3,HECW2,C3AR1,SEMA4A,SPHK1,AQP1,NTNG2,ADM,CFDP1,TNFSF12,CCM2,PAFAH1B1,DIAPH1,RTN4,ROCK1,EPN1,MYL12B,ITGB2,GLA,MECP2,KLF2,HGS,PLCG1,RHOQ,ZMPSTE24,PDCD10,DDHD2,GRN,MKLN1,VEGFA,HTATIP2,ALOX5,GNA13,FGR,SP100,SLC26A5,PDZD8,SARM1,ABI2,PDCD6,ETS1,FOXJ2,SERPINF1,BRWD3,ZFYVE27,BCL9L,RAB21,RET,DAPK3,PIK3CG,…
GO:BP	lymphocyte activation involved in immune response	GO:0002285	FALSE	0.00003219637436224918	4.492193031506742	227	6042	105	21026	ITM2A,RORA,EOMES,CD1C,CLEC4E,TNFSF13,LY9,PGLYRP1,CR1,TBX21,SEMA4A,F2RL1,STAT4,LAMP1,TNFSF12,TP53,NFKBID,PTPRC,ATP7A,PLCG2,MEN1,EXOSC3,SUPT6H,CCR6,CD46,TYROBP,IRF4,GPR183,PTGER4,FCGR3A,IL10,BRD4,TLR4,RAB27A,CD28,ASCL2,APBB1IP,PLCL2,FOXP3,HMGB1,EXOSC6,PLXNA1,MALT1,PMS2,IL23R,LCP1,RELB,LFNG,CLEC4D,PRKCZ,RARA,NOTCH2,ANXA1,CD180,CD40LG,CD19,DOCK11,LGALS3,ST3GAL1,AP1G1,IL18,ITFG2,ABL1,BCL6,IL6ST,TSC1,B…
GO:BP	cell surface receptor protein tyrosine kinase signaling pathway	GO:0007169	FALSE	0.00003266828868918004	4.485873615212717	629	6042	245	21026	GRB10,NDST1,IGF1R,VEGFC,CSRP3,TRIM71,TNS2,CDK5R1,FGF9,GP6,SORT1,PLEKHA1,CD8A,SH2B2,REPS2,EGF,MMP9,CTSD,NRG1,EPHA4,CYFIP1,IRS2,THBS1,MAPK14,ITGB3,HIP1,GAB2,PDK4,CD8B,PDE6H,CD63,GSK3A,CNKSR1,CD3E,RTN4,GNAI2,PTPN12,EIF4EBP2,APC,PXN,CASP3,DOK1,SAMD10,PDGFB,SGPL1,TSG101,ZFAND5,HGS,PLCG1,RHOQ,F7,VEGFA,RBPJ,SULF2,NPR2,OSBPL8,MVP,FGR,IQGAP1,ARID5B,RAB7A,NDEL1,LTK,PDCD6,JAK2,PIK3CA,STAT5B,ZFYVE27,LYN,SNX6…
GO:BP	regulation of protein catabolic process	GO:0042176	FALSE	0.000033430420315379686	4.475858163057371	369	6042	156	21026	IRAK3,TIMP2,XPO1,TTC36,CEBPA,TRIB2,HSP90AB1,CLU,PSMF1,GSK3A,WAC,HERPUD1,TNFSF12,APC,ROCK1,UBE2K,PSMC1,FBXL5,UBQLN1,ZER1,HGS,USP38,SEC22B,RAB7A,ADAM8,TMX1,MYLIP,SUMO1,RAD23B,C4BPA,CDKN1B,LRRK2,Q16594,OAZ1,HSPA1A,USP13,IL10,TMF1,DYX1C1,LRIG2,ATP13A2,IER3,GABARAPL2,CBFA2T3,IL1B,PLK1,NSF,USP14,SNX3,TIPARP,PSME1,SMAD3,FOXO1,USP25,GPX1,RFPL1,GSK3B,TSPAN15,BTRC,PSMD1,FMR1,FBXL20,GPC3,PINK1,ATG7,PSMD2,HM…
GO:BP	vacuolar transport	GO:0007034	FALSE	0.00003436476040739648	4.463886679664374	174	6042	85	21026	SORT1,CLU,IRGM,LAMP1,PIK3C3,SCYL2,VTI1A,AP1G2,TSG101,HGS,PTPN23,CHMP2A,NCOA4,GRN,CHMP3,RAB7A,CHMP1B,LYST,VPS18,MGRN1,LRRK2,C9ORF72,GPRASP1,HSPA1A,VPS4B,CHMP7,VPS41,ZFYVE16,NPC1,ARL8B,ATP13A2,MFSD1,AP3S1,LAMP2,VTI1B,HOOK3,CHMP1A,BIN1,PXK,VPS37B,PINK1,HOOK1,VPS52,VCP,SNAPIN,AP3B1,CHMP2B,DENND3,C14ORF133,AP1G1,SNF8,RHOB,VPS35,SORL1,M6PR,CHMP5,KIF13A,VPS13D,CACNG8,CHMP4A,SPTBN5,ATP6V0D1,NAGPA,HOOK2,V…
GO:BP	positive regulation of cell population proliferation	GO:0008284	FALSE	0.00003443169136259928	4.4630416432435664	954	6042	352	21026	IL7R,CEACAM6,IGF1R,HLA-DPB1,VCAN,LTF,VEGFC,BCL7A,ELANE,FGF9,TGFBR3,ATXN1L,TNFSF13,XCL1,EGF,MMP9,CAMP,NRG1,S100B,EPHA4,FCRL3,IRS2,THBS1,MAPK14,ITGB3,CR1,S1PR3,HPSE,SLC7A5,SPHK1,IL13RA1,AQP1,GAB2,DPP4,NDUFAF4,AKR1C3,ADM,MYC,NACC1,HAPLN2,TNFSF12,CDC42,MARCKSL1,BRK1,MTA3,CD3E,CUL3,RTN4,SERTAD1,LTBP3,GNAI2,MAP3K3,CRIP2,VAV3,PDGFB,PTPRC,TGFBR1,RARG,DNAJA2,MECP2,ZMIZ1,PLCG1,ZNF580,ATP7A,IL11RA,PDCD10,MA…
GO:BP	leukocyte cell-cell adhesion	GO:0007159	FALSE	0.00003470642705373638	4.459590093638187	415	6042	172	21026	IL7R,HLA-DPB1,ARG1,HSPH1,ELANE,XCL1,SKAP1,RHOH,SIRPA,OLR1,TIGIT,CD83,SELP,GP1BA,CR1,TBX21,DPP4,CD177,CTSG,CD27,CD3E,NFKBID,ARID1A,ROCK1,CASP3,ITGB2,PTPRC,ZMIZ1,CD300A,TRAF6,ALOX5,TNFRSF14,ADAM8,ETS1,JAK2,FCHO1,PIK3CA,STAT5B,CD46,LYN,FOXO3,CD6,FADD,FOXJ1,CCDC88B,PYCARD,CD5,EBI3,STK10,B2M,CD44,CX3CR1,IL10,LILRB4,BRD4,CD28,ASCL2,FOXP3,SLC7A1,HLA-DRB5,CEBPB,HMGB1,SELL,SMARCD3,DNAJA3,SYK,PRKAR1A,IL1B,…
GO:BP	extrinsic apoptotic signaling pathway	GO:0097191	FALSE	0.00003505717223606074	4.455223117671862	230	6042	106	21026	SORT1,NRG1,THBS1,INHBA,IFI27,SIAH2,GSK3A,ZDHHC3,TNFSF12,CRADD,CD27,PTPRC,TGFBR1,BCL2L12,KRT18,MKNK2,SP100,HYAL2,HMGB2,JAK2,FOXO3,RET,FADD,STX4,BID,HIPK1,RIPK1,HMOX1,PYCARD,HSPA1A,STK3,PPP2R1A,PAK2,RFFL,PMAIP1,TLR4,STK4,TMC8,TNFRSF10B,ITPRIP,RB1CC1,IL1B,TNFRSF10A,GSTP1,ACVR1,SMAD3,GPX1,STRADB,IGF1,GSK3B,KRT8,FAS,MAL,RNF34,TRAF1,ITM2C,BCL2A1,LGALS3,PRDX2,TNFRSF12A,SH3RF1,GABARAP,CTNNA1,FGFR1,FGG,SK…
GO:BP	regulation of protein-containing complex assembly	GO:0043254	FALSE	0.00003640971499486426	4.438782720589325	421	6042	174	21026	EVL,HAX1,NME7,CDK5R1,SKAP1,SYP,NRG1,CYFIP1,SELP,CLU,IRGM,KIF21A,DNAJC6,UBLCP1,ARPC2,ARPC3,CDC42,SPTAN1,BRK1,TP53,MAPRE1,CAPZA1,MPP7,LCAT,SH3GLB1,MECP2,PREX1,ARPC5,PLCG2,SSH1,CLIP3,FNIP1,FSCN1,RAP1B,RB1,HCFC1,VEGFA,ARFGEF1,VASP,CLIP1,NUMA1,RIOK3,SUMO1,VPS18,CDKN1B,DYRK1A,BID,PTGER4,BAG4,HCLS1,COTL1,PYCARD,HSPA1A,VPS41,CTNNBIP1,SAR1A,ADD3,TLR4,CYFIP2,PAK1,RALB,OSBPL2,TMC8,PRRT2,CAMSAP1,PLEK,PLEKHG2…
GO:BP	regulation of post-translational protein modification	GO:1901873	FALSE	0.000039338922133454714	4.4051775437025436	244	6042	111	21026	TTC36,HSP90AB1,SPHK1,CEP78,RPS7,SIAH2,COPS7B,GSK3A,HERPUD1,CUL3,HDAC3,EPAS1,TOLLIP,UBQLN1,TGFBR1,PHF23,TRAF6,TSPO,PDCD6,LRRK2,SPOPL,USP4,PTTG1IP,HDAC4,COPS5,HSPA1A,XIAP,CTNNB1,CAPN3,TANK,PTEN,NMI,DCUN1D3,COPS2,SKP1,DNAJA3,ATG5,MALT1,CEP63,PLK1,HUWE1,TRIM44,GSK3B,BTRC,FBXO33,PINK1,COPS3,VCP,TNIP1,RNF111,CBLB,IVNS1ABP,GABARAP,ABL1,PRICKLE1,FBXW7,ABCA2,RCHY1,OTUD4,MAGEA2B,HMG20A,PELI1,CHFR,UBE2L3,TS…
GO:BP	positive regulation of defense response	GO:0031349	FALSE	0.000040919100395026953	4.388073922803728	506	6042	203	21026	MMP8,IRAK3,SH2D1A,PYHIN1,ARG1,S100A12,LTF,CEBPA,CLEC4E,TLR2,FCRL3,IRGM,SUCNR1,F2RL1,RNF135,NAIP,PLA2G7,KLRC4,LAMP1,ZDHHC3,PPP6C,UFD1L,CHUK,RTN4,UBE2K,CASP3,MGST2,MFHAS1,UBQLN1,TRIM41,CD300A,PLCG2,GRN,TRAF6,NFKBIA,HYAL2,MED1,SARM1,NPAS2,ADAM8,HMGB2,ETS1,RIOK3,TLR8,TAX1BP1,STAT5B,LYN,TYROBP,PIK3CG,LRRK2,IRF3,IRF4,FADD,PTGER4,LTA,RIPK1,CASP4,PYCARD,HSPA1A,XIAP,TLR9,PAK2,BANF1,NR1H4,TLR4,NINJ1,PAK1,L…
GO:BP	regulation of protein modification by small protein conjugation or removal	GO:1903320	FALSE	0.00004458623757214528	4.350799174221303	239	6042	109	21026	TTC36,HSP90AB1,SPHK1,CEP78,RPS7,SIAH2,COPS7B,GSK3A,HERPUD1,CUL3,HDAC3,EPAS1,TOLLIP,UBQLN1,TGFBR1,PHF23,TRAF6,TSPO,PDCD6,LRRK2,SPOPL,USP4,PTTG1IP,HDAC4,COPS5,HSPA1A,XIAP,CTNNB1,CAPN3,TANK,PTEN,NMI,DCUN1D3,COPS2,SKP1,DNAJA3,ATG5,MALT1,CEP63,PLK1,HUWE1,TRIM44,GSK3B,BTRC,FBXO33,PINK1,COPS3,VCP,TNIP1,RNF111,CBLB,IVNS1ABP,GABARAP,ABL1,PRICKLE1,FBXW7,RCHY1,OTUD4,MAGEA2B,HMG20A,PELI1,CHFR,UBE2L3,TSPYL5,A…
GO:BP	regulation of hemopoiesis	GO:1903706	FALSE	0.00004553253342292066	4.341678184943616	425	6042	175	21026	GPR171,IKZF3,IL7R,LTF,HAX1,CEBPA,PGLYRP1,RHOH,FCRL3,MAPK14,CD83,CR1,INHBA,TBX21,H4C3,TNFAIP6,GFI1B,MYC,CD101,KLF13,CD27,NFKBID,ARID1A,TCF7,INPP5D,PTPRC,RARG,ZMIZ1,RB1,TRAF6,NFAM1,ZFP36L1,NFKBIA,MED1,ADAM8,HMGB2,ETS1,STAT5B,CD46,RCOR1,LYN,FOXO3,TYROBP,IRF4,CAMK4,FADD,RIPK1,HCLS1,FOXJ1,HSPA1A,TLR9,RASSF2,CTNNB1,LILRB3,B2M,KAT2A,IL10,CTNNBIP1,LILRB4,BRD4,TLR4,SLC9B2,CD28,ASCL2,UBASH3B,FOXP3,CEBPB,QK…
GO:BP	purine-containing compound metabolic process	GO:0072521	FALSE	0.000048613941702774974	4.313239164147381	563	6042	222	21026	HK2,PFKFB2,TPST1,RORA,NME7,NDUFS4,HINT1,AK3,MPP1,ABCD1,PDK4,G6PD,HK3,NDUFB1,PDE7A,GMPR2,TP53,NDUFA1,NDUFB4,NDUFA2,NDUFB3,PGM2,GNAI3,PGAM4,NDUFB6,RHOQ,NUDT3,CLPX,IMPDH1,PGLS,NPR2,UCP2,TSPO,SARM1,ND5,FBP1,ATP6V0C,ATP6,ATP5J,LRRK2,PFKFB1,GPD2,HDAC4,PGD,HSPA1A,NMNAT1,FAR1,TKT,SDHB,DERA,ENO3,BPGM,SLC25A25,SDHD,TALDO1,DNAJC30,IER3,NADK,PGM1,CBFA2T3,ND4,ABHD14B,PGK1,SULT1B1,SLC4A1,NDUFB5,ATP6V1A,TP53I3,…
GO:BP	regulation of reactive oxygen species metabolic process	GO:2000377	FALSE	0.00004978991218111506	4.302858639727568	144	6042	73	21026	HK2,GADD45A,HP,ABCD2,SIRPA,CYP1B1,THBS1,MAPK14,ABCD1,F2RL1,G6PD,CD177,AKR1C3,TP53,GNAI2,PRCP,PDGFB,ITGB2,TUSC2,PLCG2,ARF4,ALOX5,TSPO,FOXO3,TYROBP,LRRK2,RIPK1,ROMO1,ITGAM,TLR4,RAB27A,CYBA,IER3,SYK,ATG5,HDAC6,GSTP1,FOXO1,NOXA1,CD36,PINK1,TRAP1,CDKN1A,BCR,FBLN5,PDK3,PARL,TGFBR2,CBR1,PRDX2,DHRS4,BCO2,PRKCE,ADGRB1,CTNS,PLIN5,AKR1C1,VDAC1,DCXR,ELAVL1,TGFB1,PARK2,CLEC7A,TLR6,SLC5A3,SHC1,EIF6,ZNF205,PARK…
GO:BP	regulation of organelle assembly	GO:1902115	FALSE	0.000050466438072197015	4.296997346745997	234	6042	107	21026	WIPI1,CENPJ,LRFN1,MPHOSPH9,MTMR3,SH3GLB1,TSG101,PHF23,CHMP2A,STYXL1,FSCN1,ARF4,SEC22B,CHMP3,CHMP1B,NUMA1,LRRK2,C9ORF72,CNTROB,SNX18,HSPA1A,VPS4B,PIP4K2C,EHMT2,CHMP7,KAT2A,EML3,RALB,LRSAM1,RAB5A,PAN2,KIF24,SNX30,RAB3GAP2,ATG5,PLK1,CNOT6,LCP1,SDCBP,CHMP1A,IFT140,ATG3,IFT20,CNOT2,GSK3B,RBM14,RNF4,PRKAA1,PINK1,GPSM2,CASKIN1,LIMK2,CDKL5,FEZ2,ODF2L,HAP1,CHMP2B,ATM,SCFD1,PPP1R35,UBQLN2,ABL1,HCK,PRICKLE1…
GO:BP	regulation of cell cycle	GO:0051726	FALSE	0.00005088101619883274	4.293444223516513	1087	6042	394	21026	IGF1R,XPO1,GADD45A,BCL7A,ALOX15B,CEBPA,EGF,MAPK14,HSP90AB1,CENPJ,GEN1,HECW2,RPS27L,INHBA,MORF4L2,ABRAXAS1,SPHK1,PTPRK,GFI1B,CDCA8,MYC,PLAGL1,WAC,CTDSP1,CALM2,CDK7,MIIP,DR1,YY1,CDC42,PIK3C3,TADA3,PAFAH1B1,ANAPC11,TP53,ANKK1,MTA3,CCNH,RAD21,C6ORF89,CUL3,ARID1A,HDAC3,APC,TAOK3,RAE1,THAP1,CASP3,ZC3H12D,EPC2,SH3GLB1,PDGFB,TRRAP,PTPRC,SPDYE2,TSG101,EP400,TGFBR1,TERF2,CDKN2D,RHEB,CHMP2A,PLCG2,ZMPSTE24,R…
GO:BP	lipid metabolic process	GO:0006629	FALSE	0.0000520062623110175	4.283944357838906	1391	6042	491	21026	RORA,PLBD1,IGF1R,PNPLA2,PLTP,PRKAB2,ABCD2,ALOX15B,CEBPA,PLEKHA1,THEM4,PRLH,OLAH,ST3GAL6,CES1,CRAT,HSD3B7,ECHDC2,PTGR3,CYP1B1,TBXAS1,IRS2,B4GALT5,MAPK14,ECHDC3,MBOAT2,BDH2,CLU,TTC7B,INHBA,SPHK1,PTGS1,ABCD1,NR1D2,NCEH1,PDK4,G6PD,AKR1C3,MTMR3,PLA2G7,ADM,FECH,BMX,B3GALT4,DGKA,LPGAT1,ISYNA1,LSR,PIK3C3,CYB5R3,ORMDL2,PAFAH1B1,AGPAT2,PIGS,JAZF1,PLSCR3,PRDX6,GSTM2,MGST2,INPP5D,MTMR14,PNPLA8,LCAT,PDGFB,SGM…
GO:BP	regulation of establishment of protein localization	GO:0070201	FALSE	0.000054091416256052096	4.266871647433214	537	6042	213	21026	PFKFB2,KCNE1,FZD5,XPO1,VEGFC,HAX1,ASPH,CDK5R1,ABAT,CTSD,TLR2,IRS2,MAPK14,CENPJ,IFI27,F2RL1,GSK3A,CDC42,HDAC3,TMEM30A,UBE2D3,SERP1,SH3GLB1,EDEM1,ITGB2,TSG101,PTPN23,PDCD10,MIDN,UCP2,ALOX5,TXN,SP100,HYAL2,ENY2,ADAM8,NDEL1,JAK2,TRIM28,SUMO1,ARFIP1,HSPA1L,APBB1,LRRK2,MFF,PIM3,OAZ1,STX4,TTN,BAG4,HCLS1,UBE2J1,MYO18A,PLA2G6,ACVR1C,ITGAM,SAR1A,XPO4,NR1H4,TLR4,SLC9B2,FRAT1,UBL5,RFX3,ORAI1,GRIPAP1,NR1D1,IN…
GO:BP	regulation of production of molecular mediator of immune response	GO:0002700	FALSE	0.0000564542256680629	4.248303545047473	194	6042	92	21026	IRAK3,FZD5,ARG1,TNFSF13,XCL1,FCRL3,CR1,TBX21,IL1R1,SLC7A5,F2RL1,TNFSF12,RTN4,TMBIM6,PTPRC,PLCG2,TRAF6,EXOSC3,TNFRSF14,SUPT6H,STX4,UBE2J1,MZB1,PYCARD,TLR9,B2M,IL10,LILRB4,TLR4,CD28,FOXP3,EXOSC6,SYK,NLRX1,IL1B,ATG5,CD22,MALT1,PMS2,PRKCZ,CD36,BTK,LACC1,CD40LG,SPON2,SECTM1,MAP3K7,PGC,CD7,IL18,TNFRSF4,CLNK,BCL6,HLA-A,CCR2,SCIMP,CD86,CD226,ATAD5,SLC15A4,C17ORF99,CLCF1,EPHB2,GATA3,TRAF2,TICAM1,PKN1,PHB,…
GO:BP	regulation of cytoskeleton organization	GO:0051493	FALSE	0.00006055583198670037	4.217844024648515	517	6042	206	21026	EVL,HAX1,NME7,CDK5R1,TRPM2,CLIC4,RHOH,CYFIP1,ITGB3,CENPJ,KIF21A,F2RL1,SH3BP1,GSK3A,ARPC2,ARPC3,CDC42,SPTAN1,BRK1,PAFAH1B1,DIAPH1,MAPRE1,CAPZA1,APC,ROCK1,RAE1,PXN,NEB,TGFBR1,MECP2,PREX1,ARPC5,RHOQ,CHMP2A,SSH1,CLIP3,FSCN1,CHMP3,STMN3,ARFGEF1,MID1IP1,VASP,CLIP1,CHMP1B,ABI2,NUMA1,PIK3CA,GMFB,ARFIP1,CDKN1B,DAPK3,STAU2,DYRK1A,C9ORF72,PTGER4,BAG4,HCLS1,BICD2,GMFG,COTL1,PYCARD,HSPA1A,VPS4B,SPAST,CHMP7,PA…
GO:BP	polysaccharide metabolic process	GO:0005976	FALSE	0.00006059086858958359	4.217592821707805	102	6042	56	21026	GRB10,NDST1,CHIT1,WIPI1,EGF,IRS2,GBE1,GSK3A,GAA,PPP1R3E,PDGFB,PGM2,UGP2,PPP1R3D,ATG12,STK40,NR1D1,INPP5K,NPC1,LEPR,EPM2AIP1,RB1CC1,PPP1R3B,WIPI2,GYG1,ATG3,IGF1,GSK3B,SLC37A4,PHKA2,PYGL,PRKAG2,GABARAPL1,IL6ST,MGAM,PPP1R3C,AKT1,DYRK2,EXT1,PHKA1,KHK,ENPP1,EXT2,WDR45,NFKB1,PPP1CA,TGFB1,PHKB,PYGB,PER2,SMPD3,PHKG2,STBD1,POMC,COMT,PPP1R3F
GO:BP	negative regulation of apoptotic signaling pathway	GO:2001234	FALSE	0.00006173390670194162	4.2094762387398434	232	6042	106	21026	MMP9,NRG1,THBS1,CLU,SIAH2,GRINA,HERPUD1,HYOU1,GNAI2,TMBIM6,TGFBR1,CDKN2D,RB1,SLC25A5,MAZ,HMGB2,LRRK2,Q16594,BID,RIPK1,HMOX1,PTTG1IP,HSPA1A,ING2,CTNNB1,CD44,CX3CR1,IL10,RFFL,SYVN1,IER3,ITPRIP,RB1CC1,IL1B,RRN3,RTKN2,GSTP1,ACVR1,GPX1,STRADB,GHITM,TXNDC12,TAF9B,IGF1,GSK3B,RNF34,PINK1,TRAP1,PYCR1,ARMC10,LGALS3,PARL,ELL3,HSPB1,PRDX2,IVNS1ABP,SH3RF1,PLAUR,ACAA2,NONO,CTNNA1,FGG,WNT1,PF4,CX3CL1,NOL3,PDX1,…
GO:BP	regulation of hydrolase activity	GO:0051336	FALSE	0.00006339346705313574	4.19795549557193	352	6042	149	21026	TIMP2,PTX3,PPP1R17,SORT1,FGD4,EPHA4,GZMA,PPP1R26,CR1,F2RL1,SH3BP1,CALM2,TBC1D2,TMBIM6,ROCK1,DOCK9,SNX13,VAV3,TERF2,GRN,STMN3,ARFGEF1,ABR,RAP1A,FICD,IQGAP1,NDEL1,SERPINB1,RRP1B,LYN,LRRK2,CSTA,FOXJ1,SNX18,NEIL1,HSPA1A,DDX11,RAPGEF2,SEMG1,TANK,CCDC125,PLEK,APH1B,EGLN1,MBP,PSMB8,HMGB1,ATP13A2,BMP2,EPHA1,DFFA,RAB3GAP2,VAV1,PRSS22,TMED2,EVI5,ARHGAP42,BIN1,FGD1,GSK3B,NR1H3,PINK1,RALBP1,RGS2,GMIP,BCR,PDE…
GO:BP	tumor necrosis factor superfamily cytokine production	GO:0071706	FALSE	0.00007293013601052207	4.137092976501939	171	6042	83	21026	GPR18,MMP8,IRAK3,FZD5,BPI,LTF,ORM2,SIRPA,TLR2,THBS1,AZU1,CLU,ELF4,RAD21,PTPRC,PLCG2,TSPO,ADAM8,JAK2,HDAC2,TYROBP,LRRK2,FADD,RIPK1,UBE2J1,PYCARD,TLR9,FCGR3A,CX3CR1,FXR1,IL10,LILRB4,IFNGR1,NR1H4,TLR4,TLR1,FRMD8,CYBA,FOXP3,HMGB1,SYK,PTPN11,LY96,TNFRSF8,GSTP1,DHX9,APP,CD36,IGF1,RARA,BTK,FCGR2A,CLEC4A,SPON2,DICER1,CHRNA7,HSPB1,CCR2,CYBB,PF4,CX3CL1,CACTIN,CD86,ORM1,C1QTNF4,GHRL,EPHB2,VSIR,C5AR2,LILRA2,…
GO:BP	regulation of tumor necrosis factor superfamily cytokine production	GO:1903555	FALSE	0.00007293013601052207	4.137092976501939	171	6042	83	21026	GPR18,MMP8,IRAK3,FZD5,BPI,LTF,ORM2,SIRPA,TLR2,THBS1,AZU1,CLU,ELF4,RAD21,PTPRC,PLCG2,TSPO,ADAM8,JAK2,HDAC2,TYROBP,LRRK2,FADD,RIPK1,UBE2J1,PYCARD,TLR9,FCGR3A,CX3CR1,FXR1,IL10,LILRB4,IFNGR1,NR1H4,TLR4,TLR1,FRMD8,CYBA,FOXP3,HMGB1,SYK,PTPN11,LY96,TNFRSF8,GSTP1,DHX9,APP,CD36,IGF1,RARA,BTK,FCGR2A,CLEC4A,SPON2,DICER1,CHRNA7,HSPB1,CCR2,CYBB,PF4,CX3CL1,CACTIN,CD86,ORM1,C1QTNF4,GHRL,EPHB2,VSIR,C5AR2,LILRA2,…
GO:BP	regulation of inflammatory response	GO:0050727	FALSE	0.00007531293981105092	4.123130399553107	390	6042	162	21026	MMP8,RORA,S100A12,ELANE,CEBPA,XCL1,MMP9,PGLYRP1,SIRPA,TLR2,MAPK14,IL1R1,IRGM,SUCNR1,SPHK1,NR1D2,NAIP,PLA2G7,TNFAIP6,PSMB4,ELF4,CASP3,MGST2,SHARPIN,PTPRC,MFHAS1,PLCG1,PLCG2,GRN,RB1,ALOX5,FGR,NFKBIA,HYAL2,ADAM8,ETS1,JAK2,STAT5B,NLRP7,LYN,PSMA6,PIK3CG,LRRK2,IRF3,PTGER4,CARD16,LTA,RIPK1,CASP4,PYCARD,XIAP,TLR9,METRNL,FXR1,IL10,BRD4,NR1H4,TLR4,NINJ1,CD28,NR1D1,NMI,F12,FOXP3,LPCAT3,CEBPB,CASP5,IER3,OSM,…
GO:BP	positive regulation of organelle organization	GO:0010638	FALSE	0.00007874845240998109	4.103757972349913	492	6042	197	21026	CCT2,EVL,CDK5R1,WIPI1,EGF,MMP9,CYFIP1,CENPJ,IRGM,SPHK1,F2RL1,MYC,GSK3A,ARPC2,YY1,CDC42,BRK1,ANAPC11,TP53,MAPRE1,RAD21,CUL3,PXN,SH3GLB1,PDGFB,TGFBR1,TERF2,MECP2,DDHD2,GRN,FSCN1,RB1,NPR2,VASP,CLIP1,ANK1,ABI2,NUMA1,TINF2,CDKN1B,MFF,PLD6,BID,BAG4,SNX18,PYCARD,HSPA1A,VPS4B,SPAST,PIP4K2C,CTNNB1,DDX11,YME1L1,TNKS,PMAIP1,ADD3,PAK1,SURF4,RALB,LRSAM1,CD28,PRRT2,TOM1,PLXNA3,PLEK,PPP1R10,PAN2,MCRS1,SNX30,EPH…
GO:BP	regulation of tumor necrosis factor production	GO:0032680	FALSE	0.00007909441639898791	4.101854174058575	166	6042	81	21026	GPR18,MMP8,IRAK3,FZD5,BPI,LTF,ORM2,SIRPA,TLR2,THBS1,AZU1,CLU,ELF4,RAD21,PTPRC,PLCG2,TSPO,JAK2,HDAC2,TYROBP,LRRK2,FADD,RIPK1,UBE2J1,PYCARD,TLR9,FCGR3A,CX3CR1,FXR1,IL10,LILRB4,IFNGR1,NR1H4,TLR4,TLR1,FRMD8,CYBA,FOXP3,HMGB1,SYK,PTPN11,LY96,TNFRSF8,GSTP1,DHX9,APP,CD36,IGF1,RARA,BTK,FCGR2A,CLEC4A,SPON2,DICER1,CHRNA7,HSPB1,CCR2,CYBB,PF4,CX3CL1,CACTIN,ORM1,C1QTNF4,GHRL,EPHB2,VSIR,C5AR2,LILRA2,TICAM1,TLR3…
GO:BP	tumor necrosis factor production	GO:0032640	FALSE	0.00007909441639898791	4.101854174058575	166	6042	81	21026	GPR18,MMP8,IRAK3,FZD5,BPI,LTF,ORM2,SIRPA,TLR2,THBS1,AZU1,CLU,ELF4,RAD21,PTPRC,PLCG2,TSPO,JAK2,HDAC2,TYROBP,LRRK2,FADD,RIPK1,UBE2J1,PYCARD,TLR9,FCGR3A,CX3CR1,FXR1,IL10,LILRB4,IFNGR1,NR1H4,TLR4,TLR1,FRMD8,CYBA,FOXP3,HMGB1,SYK,PTPN11,LY96,TNFRSF8,GSTP1,DHX9,APP,CD36,IGF1,RARA,BTK,FCGR2A,CLEC4A,SPON2,DICER1,CHRNA7,HSPB1,CCR2,CYBB,PF4,CX3CL1,CACTIN,ORM1,C1QTNF4,GHRL,EPHB2,VSIR,C5AR2,LILRA2,TICAM1,TLR3…
GO:BP	leukocyte migration	GO:0050900	FALSE	0.00008300288997214855	4.08091	402	6042	166	21026	GPR18,S100A12,VEGFC,ELANE,TRPM2,XCL1,ITGA2B,HSD3B7,SIRPA,THBS1,SELP,ITGB3,AZU1,GP1BA,TBX21,C3AR1,IL1R1,MPP1,F2RL1,DPP4,CD177,PF4V1,PLA2G7,TNFAIP6,CCR5,CTSG,CDC42,PAFAH1B1,PLEC,RTN4,ROCK1,VAV3,PDGFB,ITGB2,PREX1,CD300A,ZNF580,F7,VEGFA,ALOX5,TNFRSF14,GPR15,ADAM8,LYST,STAT5B,CCR6,LYN,RET,PIK3CG,MOSPD2,FADD,GPR183,PTGER4,HMOX1,FOXJ1,PYCARD,MMP28,STK10,CX3CR1,IL10,NINJ1,SPNS2,MED23,CD99L2,OXSR1,ASCL2,C…
GO:BP	organelle localization	GO:0051640	FALSE	0.00008493454215918195	4.070915649941832	620	6042	240	21026	STX17,FCER1A,XPO1,SYTL2,WIPI1,SDAD1,ABRAXAS1,GAB2,CDCA8,INSC,TFEB,TOR1A,LAMP1,ACTR2,ACTR3,PPP6C,CDC42,PAFAH1B1,MAPRE1,CUL3,HDAC3,KIF5B,APC,KPNB1,KIF1C,EXOC6,STXBP3,TSG101,MECP2,PICALM,HGS,CD300A,RNF13,CHMP2A,BRAT1,PDCD10,MYO5A,PABPC1L,RB1,BLOC1S3,CHMP3,FAM91A1,DYNLT1,HPS6,HSBP1,FGR,PDZD8,RAB7A,CHMP1B,NUMA1,NDEL1,PDCD6,RAB1A,KNTC1,VPS18,LYN,PIK3CG,LRRK2,STX4,SPAG9,IFFO1,BICD2,COPS5,VPS4B,UBXN2B,SP…
GO:BP	nuclear export	GO:0051168	FALSE	0.00008980506181592002	4.046699183858667	169	6042	82	21026	XPO1,THOC1,SDAD1,IFI27,RAE1,YTHDC1,RBM8A,RANBP3,UPF1,LZTS2,TXN,SP100,ENY2,SUPT6H,XPO7,THOC6,CDKN1B,NUP160,THOC7,SMG6,XPO4,SETD2,FRAT1,EIF4A3,MDN1,NUP153,NUP62CL,FRAT2,IL1B,MALT1,NUP214,EMD,PTPN11,AGFG1,ZC3H11A,DHX9,DDX39B,STRADB,GSK3B,FMR1,XPOT,NUTF2,GLE1,SARNP,ATXN1,RANBP17,SHFM1,TSC1,HHEX,TPR,SMG5,NXT1,DDX19A,NUP155,XPO5,RANGAP1,NUP62,PABPN1,NUP93,DDX39A,CALR,MCM3AP,IWS1,KHDRBS1,LSG1,TGFB1,HSPA…
GO:BP	B cell receptor signaling pathway	GO:0050853	FALSE	0.0000928472026858484	4.03223	72	6042	43	21026	PLEKHA1,SH2B2,FCRL3,MS4A1,BMX,VAV3,PTPRC,CD300A,PLCG2,ITK,NFAM1,NFKBIA,LYN,CMTM3,LIME1,PLCL2,SYK,CD79B,CD22,BLK,MAPK1,MNDA,BTK,SLC39A10,CD79A,CD19,ABL1,BLNK,TMIGD2,IGHA1,GPS2,BANK1,IGHA2,IGHM,IGHG4,NFKB1,PRKCB,NCKAP1L,LPXN,PTPN6,CD81,PRKCH,BAX
GO:BP	locomotion	GO:0040011	FALSE	0.00009558119649185883	4.019627537253606	1255	6042	446	21026	GPR18,CEACAM6,IGF1R,S100A12,EVL,GADD45A,VEGFC,ALOX15B,ELANE,FGF9,TRPM2,RAB13,TGFBR3,ADORA3,XCL1,CLIC4,ITGA2B,EGF,HSD3B7,MMP9,SHTN1,NRG1,CXCR6,EPHA4,CYP1B1,IRS2,THBS1,MAPK14,SELP,ITGB3,AZU1,GP1BA,C3AR1,RNASE3,SEMA4A,IL1R1,SUCNR1,SPHK1,KIF21A,MPP1,AQP1,F2RL1,DOCK4,DPP4,NTNG2,SH3BP1,PF4V1,SCAI,PTPRK,PLA2G7,TNFAIP6,RRAS2,MCTP1,CCR5,CTSG,MIIP,CDC42,PLEC,MINK1,RTN4,GNAI2,APC,MAP3K3,ROCK1,PRCP,YTHDF3,IG…
GO:BP	viral process	GO:0016032	TRUE	0.00009622448270314612	4.016714414967308	423	6042	173	21026	PTX3,LTF,CLEC5A,SRPK1,FUT8,CXCR6,ITGB3,HSP90AB1,NMT2,SLPI,CR1,IFI27,ATP7B,KPNA3,DPP4,ITGB5,CCR5,LAMP1,GSK3A,CTBP2,PIK3C3,TP53,EIF3A,CSDE1,PCSK5,TSG101,CHMP2A,ZDHHC20,HCFC1,CHMP3,DYNLT1,TNFRSF14,MCTS1,SP100,HYAL2,GPR15,RAB7A,CHMP1B,TRIM28,GALNT1,RAB1A,CD46,ST6GALNAC3,VPS18,RRP1B,PKN2,OAZ1,ATG12,HSPA1A,VPS4B,MGAT4B,CHMP7,BANF1,IL32,CTBP1,USF2,BRD4,LRSAM1,CD28,DENR,ADARB1,SNW1,EIF2D,SLC7A1,INPP5K,NP…
GO:BP	negative regulation of cytokine production	GO:0001818	FALSE	0.00010302600750660825	3.9870531297524545	292	6042	127	21026	GPR18,IRAK3,ARG1,BPI,LTF,ABCD2,ELANE,GPR174,XCL1,TRIB2,PGLYRP1,SIRPA,THBS1,TIGIT,CD83,IL1R2,CR1,INHBA,TBX21,IRGM,ABCD1,F2RL1,ELF4,YY1,UFD1L,RAD21,CUL3,HOMER3,CASP3,INPP5D,PTPRC,KLF2,TUSC2,TSPO,PPM1B,TLR8,SERPINB1,NLRP7,TYROBP,PTGER4,ATG12,CARD16,FOXJ1,PYCARD,BANF1,CX3CR1,FXR1,IL10,LILRB4,NR1H4,TLR4,NMI,FOXP3,QKI,HMGB1,GLTPD1,NLRX1,ATG5,SRGN,PTPN11,IL23R,GSTP1,EXTL3,RELB,IGF1,RARA,BTK,SLC37A4,ANXA…
GO:BP	regulation of leukocyte proliferation	GO:0070663	FALSE	0.00010536275089150528	3.9773128990048443	267	6042	118	21026	IKZF3,HLA-DPB1,ARG1,XCL1,FCRL3,IRS2,CR1,CD3E,CASP3,INPP5D,VAV3,PTPRC,CD300A,TRAF6,TNFRSF14,JAK2,STAT5B,CD46,LYN,TYROBP,CD6,FADD,BID,GPR183,FOXJ1,MZB1,CCDC88B,PYCARD,TLR9,CTNNB1,EBI3,FCGR3A,IL10,LILRB4,TLR4,CD28,FOXP3,SLC7A1,CEBPB,HMGB1,ZNF335,DNAJA3,SYK,PRKAR1A,TNFRSF13B,IL1B,CD22,IL23R,GSTP1,MAPK1,SOS2,IGF1,MNDA,CNN2,BTK,ANXA1,CARD11,SLC4A2,CDKN1A,SLC39A10,ICOSLG,CD40LG,LGALS3,LILRB2,CBLB,TGFBR2…
GO:BP	negative regulation of multicellular organismal process	GO:0051241	FALSE	0.00010644045210862626	3.9728932894394706	1087	6042	392	21026	RETN,GPR18,IRAK3,ARG1,EVL,BPI,GADD45A,LTF,ABCD2,ELANE,CEBPA,GPR174,KREMEN1,XCL1,TRIB2,SERPINB2,TNNT1,PROS1,PGLYRP1,SIRPA,KIAA0319,EPHA4,TLR2,THBS1,TIGIT,CD83,GP1BA,IL1R2,CR1,INHBA,TBX21,SEMA4A,IRGM,SERPING1,SOX6,ABCD1,F2RL1,DOCK4,G6PD,TNFAIP6,ADM,CTSG,MYC,GSK3A,ELF4,CTDSP1,YY1,UFD1L,TP53,RAD21,CUL3,HOMER3,RTN4,LTBP3,KDM4A,HDAC3,ROCK1,CASP3,EPN1,INPP5D,PDGFB,SAP30,SAP130,PTPRC,TGFBR1,RARG,MECP2,KL…
GO:BP	response to endoplasmic reticulum stress	GO:0034976	FALSE	0.00011143533561420419	3.9529770746117987	270	6042	119	21026	RNF175,THBS1,CLU,GRINA,TOR1A,HERPUD1,HYOU1,UFD1L,TP53,RNF139,FBXO44,PPP1R15B,TMBIM6,SERP1,EDEM1,UBQLN1,CCDC47,MAP3K5,ALOX5,FICD,UGGT1,TMX1,JKAMP,LRRK2,UBE2J1,CASP4,COPS5,HSPA1A,DNAJC3,USP13,PMAIP1,MARCKS,SYVN1,EDEM3,SEC61B,PARP8,UBE4B,TNFRSF10B,SERINC3,LPCAT3,CEBPB,TRIM25,USP14,TMED2,USP25,ANKZF1,SEL1L,YOD1,TXNDC12,GSK3B,NR1H3,MAN1A1,RHBDD2,DERL3,VCP,NRBF2,BBC3,RNF103,UBQLN2,ERLIN1,BFAR,ABL1,SESN…
GO:BP	endoplasmic reticulum to Golgi vesicle-mediated transport	GO:0006888	FALSE	0.00011487158380123768	3.9397873910211314	136	6042	69	21026	STX17,SEC31B,COPB2,PPP6C,HYOU1,SEC13,RNF139,CUL3,COPB1,VTI1A,RAB2A,CNIH4,ARF4,SEC22B,ANK1,PDCD6,RAB1A,CNIH,LRRK2,KDELR2,SEC23A,SPAST,SAR1A,SURF4,TRAPPC3,SEC24C,TMED5,TMED2,KLHL12,TRIP11,COPA,WHAMM,TRAPPC8,VCP,TEX261,ERGIC1,SCFD1,SAR1B,SORL1,TRAPPC1,SEC24D,STX18,GBF1,TBC1D20,SEC31A,TFG,GOSR1,MIA3,SEC23IP,LMAN2L,NRBP1,IER3IP1,SEC24A,ERGIC2,MPPE1,GOLT1A,YIF1B,TRAPPC6A,ERGIC3,TMED1,COPE,TMED3,BCAP31,…
GO:BP	cytokine-mediated signaling pathway	GO:0019221	FALSE	0.00012096976986655463	3.9173231455549176	518	6042	205	21026	MMP8,IRAK3,IL7R,ARG1,HAX1,CEBPA,XCL1,SH2B2,CXCR6,IL1R2,INHBA,IFI27,IL1R1,IRGM,SPHK1,IL13RA1,F2RL1,NAIP,PF4V1,CCR5,CTSG,STAT4,PAFAH1B1,TP53,CHUK,AGPAT2,UBE2K,YTHDF3,DOK1,SHARPIN,PDGFB,PTPRC,TOLLIP,KRT18,TRIM41,IL11RA,IFNAR2,IFNAR1,TRAF6,TNFRSF14,NFKBIA,SP100,MED1,GPR15,JAK2,IL1RN,STAT5B,EIF4E2,RRAGA,CCR6,LYN,ADIPOR2,FOXO3,IRF3,PYDC1,FADD,CARD16,HIPK1,RIPK1,HCLS1,HDAC4,CASP4,PYCARD,HSPA1A,XIAP,EBI3…
GO:BP	nervous system development	GO:0007399	FALSE	0.00012190010108856406	3.9139959342324193	2604	6042	865	21026	APCDD1,RORA,KCNE1,NDST1,FZD5,IGF1R,TTC36,VCAN,EVL,PTS,KCNA3,VEGFC,TNIK,EOMES,ABCD2,TRIM71,NDUFS4,PPP1R17,CDK5R1,FGF9,RAB13,ABAT,KREMEN1,PRLH,ATXN1L,SH2B2,EGF,KDM7A,PRKACB,SHTN1,RHOH,NRG1,TCF4,KIAA0319,S100B,EPHA4,TLR2,CYFIP1,CYP1B1,IRS2,SLC23A1,B4GALT5,C12ORF57,AZU1,HECW2,AATK,CLU,INHBA,SEMA4A,SLC7A5,SPHK1,KIF21A,SOX6,LRFN1,AQP1,RPS7,NHLH1,ABCD1,DOCK4,NAIP,G6PD,NTNG2,NRGN,ADM,RRAS2,INSC,TOR1A,GSK…
GO:BP	regulation of ubiquitin-dependent protein catabolic process	GO:2000058	FALSE	0.0001249083098660855	3.9034086680395017	170	6042	82	21026	PYHIN1,XPO1,TTC36,CEBPA,EGF,TRIB2,HSP90AB1,CLU,RPS7,GSK3A,WAC,HERPUD1,RNF139,UBE2K,ZER1,USP38,SUMO1,RAD23B,TRAF7,LRRK2,Q16594,HSPA1A,PTEN,CBFA2T3,AGTPBP1,PLK1,USP14,RFPL1,GSK3B,EIF3H,VCP,CDK2,SH3RF1,GABARAP,PRICKLE1,FBXW7,RCHY1,CHFR,WNT1,TGFB1I1,AKT1,WNT10B,MAGEF1,HSPBP1,TF,CCDC22,CSNK2A2,UBQLN4,SUFU,BAG5,QRICH2,RPL23,GBA,USP5,HECTD1,SIRT1,PHF20L1,MTM1,PARK2,UFL1,SGTA,KEAP1,AXIN2,RNF180,L3MBTL3,E…
GO:BP	synaptic vesicle cycle	GO:0099504	FALSE	0.0001278634555162441	3.893253562913586	221	6042	101	21026	CDK5R1,SYP,CYFIP1,ABCA13,DNAJC6,TOR1A,ARPC3,ATP6V1D,PIK3C3,GIT2,ROCK1,CASP3,PRKAR1B,DNAJC5,PICALM,RAP1B,ATP6AP1,RAP1A,ATP6V1C1,RAB7A,ATP6AP2,ATP6V0C,VPS18,LRRK2,C9ORF72,DENND1A,CTNNB1,CTBP1,AP2B1,AP3M2,PTEN,OSBPL2,ATP6V1E1,PRRT2,GRIPAP1,RAB5A,SLC17A5,BTBD9,PPP3R1,AP3S1,FCHO2,ATP6V1A,WNT7A,CLTA,ATP6V0A1,BIN1,FMR1,FBXL20,STX3,STXBP5,RAB3A,ACTB,SYN2,ATP6V1G1,SNAPIN,CASK,AP1G1,STXBP1,ATP6V1F,VAMP2,AC…
GO:BP	negative regulation of catalytic activity	GO:0043086	FALSE	0.00013077794172317806	3.883465502156772	293	6042	127	21026	IRAK3,TIMP2,PTX3,GADD45A,HP,SORT1,TRIB2,IRS2,GZMA,PPP1R26,CR1,RPS7,GSK3A,TP53,GNAI2,APC,TMBIM6,GLA,PTPRC,GNAI3,TSG101,TERF2,CD300A,RB1,MIDN,MEN1,ARFGEF1,PPP1R12A,MVP,HYAL2,FICD,TINF2,SERPINB1,RRP1B,LYN,SNX6,CDKN1B,LRRK2,CSTA,NEIL1,PYCARD,PAK2,BANF1,LILRB4,PTEN,TAF7,ADARB1,EGLN1,INPP5K,DNAJA3,BMP2,EPHA1,DFFA,IL1B,SLC8A1,TFAP4,PLK1,HDAC6,TMED2,GSTP1,PKIB,GNAQ,BIN1,GSK3B,PPM1F,RGS2,CDKN1A,GMIP,PRKAG…
GO:BP	regulation of T cell activation	GO:0050863	FALSE	0.00013230112321910103	3.8784364686939288	387	6042	160	21026	IL7R,HLA-DPB1,ARG1,HSPH1,XCL1,RHOH,SIRPA,TIGIT,CD83,CR1,TBX21,DPP4,CTSG,CD27,CD3E,NFKBID,ARID1A,CASP3,SIT1,TCF7,PTPRC,ZMIZ1,CD300A,TRAF6,TNFRSF14,ADAM8,JAK2,FCHO1,PIK3CA,STAT5B,CD46,LYN,FOXO3,IRF4,CAMK4,CD6,FADD,BID,FOXJ1,CCDC88B,PYCARD,CD5,CTNNB1,EBI3,B2M,KAT2A,IL10,LILRB4,BRD4,CD28,ASCL2,FOXP3,SLC7A1,HLA-DRB5,CEBPB,HMGB1,SMARCD3,DNAJA3,SYK,PRKAR1A,IL1B,MALT1,PTPN11,VAV1,IL23R,PRKCZ,SOS2,CLPTM1,…
GO:BP	response to oxygen levels	GO:0070482	FALSE	0.00013278935140913884	3.8768367503420533	344	6042	145	21026	HK2,RORA,PLOD2,VEGFC,TGFBR3,ABAT,AGTRAP,ALAS2,EPHA4,TLR2,THBS1,INHBA,SLC7A5,AQP1,DPP4,ADM,MYC,RYR1,BNIP2,HYOU1,TP53,RAD21,RTN4,TMBIM6,CASP3,EPAS1,UBQLN1,MECP2,AQP3,ATP7A,F7,ATP6AP1,TMEM199,VEGFA,UCP2,ZFP36L1,ND5,CYB5R4,ADAM8,HDAC2,ATP6,FOXO3,CDKN1B,LTA,DPM1,PMAIP1,ZEB2,ASCL2,SDHD,FOSL2,COX2,EGLN1,BMP2,CBFA2T3,ND4,PGK1,ATP6V1A,AK4,ADAM15,SMAD3,FOXO1,DNMT3A,NDUFS2,VEGFB,FAS,PRKAA1,PINK1,LONP1,COX1,…
GO:BP	positive regulation of cellular component biogenesis	GO:0044089	FALSE	0.00016453236438017643	3.783748661305387	505	6042	200	21026	EVL,CDK5R1,WIPI1,SKAP1,NRG1,CYFIP1,CENPJ,CLU,SEMA4A,F2RL1,ACTR2,ACTR3,ARPC2,CDC42,BRK1,TP53,MAPRE1,APC,MPP7,ROCK1,PXN,SH3GLB1,TSG101,TGFBR1,MECP2,HGS,RHOQ,CHMP2A,ATP7A,PLCG2,FNIP1,FSCN1,RAP1B,VEGFA,VASP,CLIP1,RAB7A,ABI2,NUMA1,NDEL1,PIK3CA,SUMO1,CDKN1B,STAU2,GPM6A,BID,ZMYND8,BAG4,SNX18,PYCARD,HSPA1A,VPS4B,PIP4K2C,MIEN1,TLR4,PAK1,RALB,LRSAM1,PLEK,PAN2,LRRN3,ATP13A2,SNX30,EPHA1,SYK,RAB3GAP2,ATG5,CNO…
GO:BP	lysosomal transport	GO:0007041	FALSE	0.00016674452042677863	3.777948429000706	137	6042	69	21026	SORT1,CLU,LAMP1,PIK3C3,SCYL2,TSG101,HGS,CHMP2A,NCOA4,GRN,CHMP3,RAB7A,CHMP1B,LYST,VPS18,MGRN1,LRRK2,C9ORF72,GPRASP1,HSPA1A,VPS4B,CHMP7,VPS41,ZFYVE16,NPC1,ARL8B,ATP13A2,MFSD1,LAMP2,HOOK3,CHMP1A,BIN1,PXK,PINK1,HOOK1,VPS52,VCP,SNAPIN,AP3B1,CHMP2B,DENND3,C14ORF133,AP1G1,RHOB,VPS35,SORL1,M6PR,CHMP5,KIF13A,CACNG8,CHMP4A,SPTBN5,NAGPA,HOOK2,EPG5,CHMP4B,MTM1,PARK2,CCDC91,AP3D1,CACNG4,PIK3R4,MVB12A,GNPTG,US…
GO:BP	positive regulation of cell-cell adhesion	GO:0022409	FALSE	0.00016822512550836258	3.7741091390094668	328	6042	139	21026	IL7R,CEACAM6,HLA-DPB1,HSPH1,ELANE,GP6,XCL1,SKAP1,RHOH,SIRPA,CD83,SELP,GP1BA,CR1,DPP4,CTSG,CD27,CD3E,NFKBID,ARID1A,ITGB2,PTPRC,ZMIZ1,PTPN23,TRAF6,ALOX5,TNFRSF14,ADAM8,ETS1,JAK2,FCHO1,PIK3CA,STAT5B,CD46,LYN,FOXO3,CD6,FADD,CCDC88B,PYCARD,CD5,EBI3,B2M,CD44,IL10,LILRB4,BRD4,CD28,FOXP3,SLC7A1,HLA-DRB5,HMGB1,SMARCD3,DNAJA3,SYK,IL1B,MALT1,PTPN11,VAV1,IL23R,PRKCZ,IGF1,RARA,EMILIN2,PRKAA1,ANK3,ANXA1,CARD11…
GO:BP	regulation of protein phosphorylation	GO:0001932	FALSE	0.0001705765468009238	3.7680806818152557	779	6042	291	21026	IRAK3,TTC36,S100A12,GADD45A,LTF,HAX1,TNIK,NDUFS4,CDK5R1,ELANE,FGF9,EGF,TRIB2,MMP9,NRG1,SIRPA,EPHA4,THBS1,ITGB3,IRGM,SPHK1,FECH,GSK3A,CTDSP1,CALM2,TADA3,TP53,CD3E,SERTAD1,PPP1R15B,HDAC3,APC,UBE2K,TAOK3,PRKAR1B,PDGFB,ITGB2,PTPRC,SPDYE2,TSG101,CDKN2D,HGS,CD300A,BRAT1,PLCG2,WDFY2,PDCD10,MAP3K5,CLIP3,TAB2,FNIP1,RB1,MEN1,VEGFA,SLCO3A1,TRAF6,TNFRSF14,TXN,MVP,FGR,RAP1A,HYAL2,IQGAP1,JTB,JAK2,TLR8,PIK3CA,C…
GO:BP	positive regulation of response to biotic stimulus	GO:0002833	FALSE	0.00017633490470297963	3.753661712547658	400	6042	164	21026	IRAK3,SH2D1A,PYHIN1,ARG1,LTF,CLEC4E,TLR2,FCRL3,IRGM,F2RL1,RNF135,NAIP,KLRC4,LAMP1,ZDHHC3,PPP6C,UFD1L,CHUK,RTN4,UBE2K,MFHAS1,UBQLN1,TRIM41,CD300A,PLCG2,GRN,TRAF6,NFKBIA,MED1,SARM1,ADAM8,HMGB2,RIOK3,TLR8,TAX1BP1,STAT5B,LYN,TYROBP,IRF3,IRF4,FADD,PYCARD,HSPA1A,XIAP,TLR9,PAK2,BANF1,NR1H4,TLR4,NINJ1,PAK1,NR1D1,NMI,TLR1,CYBA,SMPDL3A,TRIM25,HMGB1,SYK,LSM14A,GLTPD1,NLRX1,ZDHHC12,PUM2,LY96,LAMP2,VAV1,MAPKA…
GO:BP	immunoglobulin production	GO:0002377	FALSE	0.0001882645938871303	3.725231348200368	107	6042	57	21026	TNFSF13,XCL1,FCRL3,CR1,TBX21,YY1,TNFSF12,TMBIM6,PTPRC,TRAF6,EXOSC3,SUPT6H,CCR6,XRCC4,STX4,MZB1,TLR9,IL10,CD28,TRAF3IP2,FOXP3,EXOSC6,CD22,PMS2,BTK,CD40LG,TNFRSF4,BCL6,BATF,CD86,MSH3,ATAD5,SLC15A4,C17ORF99,CLCF1,EPHB2,SWAP70,CTNNBL1,TRAF2,MSH6,PKN1,MCM3AP,PHB,UNG,IL27RA,TGFB1,NHEJ1,RNF8,POLL,PCYT1A,CD40,MAD2L2,GPI,KMT5C,PHB2,SHLD1,IL4
GO:BP	regulation of cell-cell adhesion	GO:0022407	FALSE	0.0001894958409261191	3.7224003175305165	494	6042	196	21026	IL7R,CEACAM6,HLA-DPB1,ARG1,HSPH1,ELANE,GP6,XCL1,SKAP1,RHOH,SIRPA,TIGIT,MAPK14,CD83,SELP,GP1BA,CR1,TBX21,DPP4,CTSG,CD27,CD3E,MINK1,NFKBID,ARID1A,CASP3,ITGB2,PTPRC,ZMIZ1,CD300A,PTPN23,VEGFA,TRAF6,ALOX5,TNFRSF14,ADAM8,TMX1,ETS1,JAK2,IL1RN,FCHO1,PIK3CA,STAT5B,CD46,LYN,FOXO3,CD6,FADD,FOXJ1,CCDC88B,PYCARD,CD5,EBI3,FXYD5,B2M,CD44,IL10,LILRB4,BRD4,CD28,ASCL2,UBASH3B,FOXP3,SLC7A1,HLA-DRB5,MBP,CEBPB,HMGB1,…
GO:BP	regulation of DNA metabolic process	GO:0051052	FALSE	0.00019262112580126347	3.715296083173218	500	6042	198	21026	IL7R,CCT2,IGF1R,BCL7A,TNFSF13,CYP1B1,GZMA,TBX21,MORF4L2,ABRAXAS1,MYC,ACTR2,TAF12,YY1,TNFSF12,CDC42,TADA3,TP53,PPP4R2,ARID1A,HNRNPC,EPC2,PDGFB,TRRAP,PTPRC,EP400,TERF2,TNFAIP1,SENP3,UPF1,ZMPSTE24,VEGFA,DACH1,EXOSC3,NPAS2,ENY2,SUPT6H,ING3,TRIM28,TINF2,MAP2K4,FGFR4,CDKN1B,Q16594,SMG6,MORF4L1,NMNAT1,EHMT2,CTNNB1,DDX11,KAT2A,TAF10,TNKS,IL10,UIMC1,OGG1,SETD2,TAF7,CD28,PPP1R10,FOXP3,HMGB1,EXOSC6,MCRS1,IE…
GO:BP	negative regulation of protein modification process	GO:0031400	FALSE	0.00020987593885970108	3.6780373480752147	349	6042	146	21026	IRAK3,TTC36,GADD45A,TRIB2,SIRPA,CEP78,RPS7,G6PD,CTDSP1,CALM2,PPP1R15B,APC,PTPRC,TSG101,CD300A,RB1,MEN1,TSPO,MVP,HYAL2,HDAC2,CTDSP2,LYN,SNX6,CDKN1B,LRRK2,SPOPL,USP4,C9ORF72,FRY,DBI,PYCARD,HSPA1A,DNAJC3,RASSF2,CTNNB1,PAK2,CAPN3,LILRB4,PTEN,TAF7,ADARB1,DCUN1D3,INPP5K,DNAJA3,BMP2,EPHA1,IL1B,SLC8A1,TFAP4,ATG5,CEP63,PLK1,HDAC6,TMED2,GSTP1,TRIM44,DUSP6,PKIB,PRKCZ,GNAQ,IGFBP3,GSK3B,PRKAA1,PPM1F,SNTA1,RGS…
GO:BP	cellular response to starvation	GO:0009267	FALSE	0.0002153811002438273	3.6667924088371757	177	6042	84	21026	IGF1R,WIPI1,RRAGD,DSC2,SLC7A5,PLIN3,PDK4,AKR1C3,MTMR3,TFEB,PIK3C3,SLC34A1,TP53,SZT2,TNRC6A,USP33,SH3GLB1,PPM1D,MAP3K5,FNIP1,WDR59,UCP2,RRAGA,FOXO3,LRRK2,MYBBP1A,EHMT2,VPS41,YME1L1,SAR1A,PMAIP1,RALB,NUAK2,GABARAPL2,ATG5,YWHAZ,LAMP2,WIPI2,PIK3C2B,MAPK1,FOXO1,FAS,PRKAA1,RRAGC,ATG7,CDKN1A,MAP1LC3B,SESN1,ALB,GABARAPL1,SAR1B,ITFG2,GABARAP,CPEB4,SESN2,TSC1,YWHAG,MFSD2A,SRD5A1,DEPDC5,WNT2B,WDR45,SREBF2,C…
GO:BP	T cell proliferation	GO:0042098	FALSE	0.00023396568580573887	3.6308478330086094	215	6042	98	21026	HLA-DPB1,ARG1,XCL1,CR1,ELF4,TP53,PSMB10,CD3E,CASP3,PTPRC,TRAF6,TNFRSF14,JAK2,STAT5B,CD46,PIK3CG,CD6,FADD,BID,FOXJ1,CCDC88B,PYCARD,CTNNB1,EBI3,IL10,LILRB4,CD28,FOXP3,SLC7A1,CEBPB,HMGB1,DNAJA3,SYK,PRKAR1A,IL1B,MALT1,CD151,IL23R,SOS2,IGF1,ANXA1,CARD11,SLC4A2,ICOSLG,CD40LG,LGALS3,LILRB2,CBLB,TGFBR2,PRDX2,TNFRSF13C,SH3RF1,EPHB6,ERBB2,IL18,DOCK8,ABL1,TNFRSF4,BCL6,HLA-A,IL6ST,PELI1,CCR2,TNFSF14,TMIGD2,P…
GO:BP	hexose metabolic process	GO:0019318	FALSE	0.00023833957636364194	3.6228038369265403	226	6042	102	21026	HK2,PFKFB2,RORA,FUT8,IRS2,MAPK14,PFKFB4,PDK4,G6PD,TKTL1,HK3,GSK3A,TP53,GAA,SERP1,CRTC2,PPP1R3E,PGM2,KCNQ1,FPGT,BRAT1,ZMPSTE24,SIK1,FBP1,NR3C1,PIK3CA,CHST15,PFKFB1,KAT2A,PMAIP1,ENO3,MPI,POFUT2,LEPR,EPM2AIP1,PGM1,PGK1,PPP1R3B,NLN,FOXO1,ENO2,GALK2,GLB1,IGFBP3,IGF1,SLC37A4,PRKAA1,GALT,PDK1,FUCA1,SORD,IGFBP4,PDK3,FUT6,PFKP,PGAM1,SESN2,CLK2,DGKQ,ALDOC,PDX1,AKT1,DYRK2,PHKA1,GHRL,KHK,MTCL2,GNB3,FUT7,DCXR…
GO:BP	regulation of cell adhesion	GO:0030155	FALSE	0.0002482176448952842	3.6051673493148115	794	6042	295	21026	OLFM4,IL7R,CEACAM6,HLA-DPB1,ARG1,HSPH1,ELANE,GP6,XCL1,SKAP1,RHOH,NRG1,SIRPA,EPHA4,CYP1B1,THBS1,TIGIT,MAPK14,CD83,SELP,ITGB3,AZU1,GP1BA,CR1,TBX21,NUAK1,DPP4,CTSG,ARPC2,CDC42,CD27,CD3E,MINK1,NFKBID,LMO7,ARID1A,ROCK1,CASP3,VAV3,PDGFB,ITGB2,PTPRC,PREX1,ZMIZ1,CD300A,PTPN23,VEGFA,RBPJ,TRAF6,ALOX5,TNFRSF14,PPP1R12A,ADAM8,TMX1,ETS1,JAK2,IL1RN,RELL2,FCHO1,PIK3CA,STAT5B,CD46,LYN,FOXO3,RET,DAPK3,PIK3CG,CD6,…
GO:BP	regulation of TOR signaling	GO:0032006	FALSE	0.00026082170343377504	3.583656273026957	146	6042	72	21026	RRAGD,PRKACB,GSK3A,WAC,LAMTOR2,SEC13,CUL3,SZT2,HDAC3,RHEB,ZMPSTE24,F7,FNIP1,WDR59,UBE2W,PDCD6,PIK3CA,RRAGA,USP4,C9ORF72,STAMBPL1,LAMTOR3,RFFL,SAR1A,NPC1,SYK,YWHAZ,TMEM127,GSK3B,UBR2,PRKAA1,PIM1,RRAGC,TBK1,SIK3,SESN1,ATM,SRMS,SAR1B,KLHL22,ITFG2,SESN2,TSC1,PELI1,TBCK,YWHAG,DGKQ,AKT1,DEPDC5,SH3BP4,CTNS,USP32,NCKAP1L,GBA,SIRT1,MTM1,UBR1,RRAGB,RBX1,GPR137,AKT1S1,LAMTOR4,MLST8,OTUB1,PIH1D1,WDR24,STK11,…
GO:BP	metabolic process	GO:0008152	FALSE	0.00027371148613983194	3.5627069772976623	14136	6042	4221	21026	GZMK,MAFG,GPR18,TDRD9,MMP8,MTARC1,GRB10,HK2,IRAK3,ITM2A,IKZF3,TIMP2,PFKFB2,STX17,PYHIN1,DCAF16,TPST1,ZNF134,IL7R,HPR,RPL9,RORA,PLOD2,KLHL20,FKBP5,PTX3,CCT2,ERAP2,NDST1,DAO,KLF12,TSHZ3,FZD5,PLBD1,IGF1R,XPO1,TTC36,ATF7IP2,CHIT1,ELAC1,CLEC3B,HLA-DPB1,ARG1,SLC28A3,S100A12,LCN2,PNPLA2,PTS,BPI,HSPH1,GADD45A,ZNF141,PLTP,LTF,PRKAB2,BCL7A,CSRP3,HP,HAX1,TNIK,RNF144B,GAS5,ASPH,EOMES,RNF175,ABCD2,TRIM71,C1RL…
GO:BP	endosome organization	GO:0007032	FALSE	0.00027580837230935256	3.5593925547208474	98	6042	53	21026	ATP6V1D,VTI1A,PLEKHA3,TSG101,HGS,CHMP2A,ATP6AP1,CHMP3,RAB7A,CHMP1B,ATP6AP2,SNX10,ATP6V0C,VPS18,VPS4B,CHMP7,TMCC1,RAB27A,TOM1,EXOC8,TMEM127,ATP6V1A,SNX3,HOOK3,CHMP1A,ATP6V0A1,VPS37B,HOOK1,UBR4,CHMP2B,SNF8,CHMP5,ATP6V1F,CHMP4A,HOOK2,VTA1,VPS33B,RNF26,ATP6V1H,ARFGEF2,VPS37A,CHMP4B,IST1,PARK2,EEA1,RAB11A,MVB12A,PLEKHJ1,VPS25,PHETA1,VPS28,CHMP6,RNASEK
GO:BP	B cell activation involved in immune response	GO:0002312	FALSE	0.0003210698119133064	3.493400526373077	91	6042	50	21026	ITM2A,TNFSF13,CR1,TBX21,TNFSF12,PTPRC,PLCG2,EXOSC3,SUPT6H,CCR6,GPR183,IL10,TLR4,CD28,PLCL2,FOXP3,EXOSC6,PMS2,LFNG,NOTCH2,CD180,CD40LG,CD19,DOCK11,ST3GAL1,ITFG2,ABL1,BCL6,BATF,IRF8,ATAD5,SLC15A4,C17ORF99,CLCF1,SWAP70,MSH6,UNG,IL27RA,TGFB1,RNF8,DOCK10,PCYT1A,CD40,MAD2L2,DDRGK1,LGALS1,KMT5C,SHLD1,IL4,MFNG
GO:BP	regulation of leukocyte cell-cell adhesion	GO:1903037	FALSE	0.00032235718029378284	3.4916626517217186	377	6042	155	21026	IL7R,HLA-DPB1,ARG1,HSPH1,ELANE,XCL1,SKAP1,RHOH,SIRPA,TIGIT,CD83,SELP,GP1BA,CR1,TBX21,DPP4,CTSG,CD27,CD3E,NFKBID,ARID1A,CASP3,ITGB2,PTPRC,ZMIZ1,CD300A,TRAF6,ALOX5,TNFRSF14,ADAM8,ETS1,JAK2,FCHO1,PIK3CA,STAT5B,CD46,LYN,FOXO3,CD6,FADD,FOXJ1,CCDC88B,PYCARD,CD5,EBI3,B2M,CD44,IL10,LILRB4,BRD4,CD28,ASCL2,FOXP3,SLC7A1,HLA-DRB5,CEBPB,HMGB1,SMARCD3,DNAJA3,SYK,PRKAR1A,IL1B,MALT1,PTPN11,VAV1,IL23R,PRKCZ,TNFAI…
GO:BP	negative regulation of transport	GO:0051051	FALSE	0.000331944265825697	3.4789348291763242	412	6042	167	21026	GRB10,KCNE1,ABAT,EGF,MMP9,NRG1,SIRPA,TLR2,CYFIP1,IRS2,THBS1,ITGB3,INHBA,F2RL1,MCTP1,GSK3A,CALM2,ARHGAP1,GNAI2,TMBIM6,GSTM2,STXBP3,KCNQ1,UBQLN1,PICALM,CD300A,ATP7A,RAP1B,MIDN,UCP2,TSPO,TXN,RAP1A,SP100,SLC26A5,ENY2,RAB7A,SUMO1,ARFIP1,LRRK2,PIM3,C9ORF72,OAZ1,TBC1D4,UBE2J1,VPS4B,TLR9,ARL6IP5,CAB39,ACVR1C,SEMG1,MTMR4,VAMP3,SLC6A9,PTEN,LRSAM1,ATXN2,OXSR1,PRRT2,GABBR1,TRAT1,INPP5K,NUP153,HMGB1,OSM,DPH3,…
GO:BP	positive regulation of production of molecular mediator of immune response	GO:0002702	FALSE	0.00034381568784312466	3.4636743109291803	139	6042	69	21026	FZD5,TNFSF13,XCL1,TBX21,IL1R1,SLC7A5,F2RL1,TNFSF12,RTN4,PTPRC,PLCG2,TRAF6,EXOSC3,TNFRSF14,STX4,MZB1,PYCARD,TLR9,B2M,IL10,TLR4,CD28,EXOSC6,SYK,IL1B,MALT1,PMS2,PRKCZ,CD36,BTK,LACC1,SPON2,SECTM1,MAP3K7,PGC,CD7,IL18,TNFRSF4,CLNK,HLA-A,SCIMP,CD86,CD226,ATAD5,C17ORF99,CLCF1,EPHB2,GATA3,TRAF2,TICAM1,PHB,TLR7,TLR3,TGFB1,SIRT1,MAPKAPK2,CLEC7A,CD81,DDX21,CD40,MAD2L2,GPI,CARD9,KMT5C,PHB2,SHLD1,SEMA7A,IL4,SP…
GO:BP	carbohydrate biosynthetic process	GO:0016051	FALSE	0.0003492182509800262	3.4569030671062517	192	6042	89	21026	GRB10,NDST1,CHST13,ST3GAL6,EGF,FUT8,IRS2,GBE1,G6PD,B3GALT4,GSK3A,CRTC2,PPP1R3E,PDGFB,PGM2,NANS,UGP2,SIK1,PPP1R3D,FBP1,NR3C1,CHST15,PFKFB1,PGD,KAT2A,ENO3,NR1D1,PLEK,INPP5K,LEPR,EPM2AIP1,PGM1,PGK1,PPP1R3B,NLN,FOXO1,GYG1,ENO2,IGF1,GSK3B,ST6GALNAC1,SLC37A4,SORD,FUT6,PGAM1,B3GALT2,SESN2,PPP1R3C,LALBA,CLK2,DGKQ,ALDOC,AKT1,DYRK2,EXT1,MTCL2,PTH1R,FUT7,ENPP1,EXT2,NFKB1,TPI1,ENO1,PPP1CA,CRY1,TGFB1,SIRT1,AK…
GO:BP	regulation of response to cytokine stimulus	GO:0060759	FALSE	0.0003608188990666534	3.4427107229443896	176	6042	83	21026	MMP8,IRAK3,ARG1,TLR2,IL1R2,IL1R1,IRGM,SPHK1,F2RL1,NAIP,PAFAH1B1,AGPAT2,UBE2K,YTHDF3,SHARPIN,PTPRC,TRIM41,MED1,IL1RN,EIF4E2,IRF3,PYDC1,Q16594,FADD,CARD16,HIPK1,RIPK1,CASP4,PYCARD,HSPA1A,XIAP,RFFL,TANK,NR1H4,TLR4,GIGYF2,DNAJA3,SYK,LSM14A,PTPN11,SPATA2,GSTP1,TRIM44,USP25,DHX9,IKBKB,NR1H3,TBK1,CASP1,DICER1,SPPL2A,CXCR4,IL6ST,OTUD4,NOL3,CACTIN,GPS2,MIB2,NLRC5,EXT1,CD300LF,C1QTNF4,MAPK7,TRAF2,PTPN1,CNO…
GO:BP	immune system development	GO:0002520	FALSE	0.0003665592540033141	3.4358558120006344	203	6042	93	21026	IRAK3,IL7R,TNFSF13,TBX21,YY1,TNFSF12,TP53,CD3E,PTPRC,TGFBR1,ZMPSTE24,EXOSC3,SUPT6H,HMGB2,STAT5B,CCR6,XRCC4,LYN,RET,FADD,LTA,FOXJ1,CTNNB1,NFKB2,IL10,LILRB4,XKR8,SPNS2,CD28,TRAF3IP2,FOXP3,HMGB1,EXOSC6,ARTN,PMS2,JARID2,MAPK1,SMAD3,SLC46A2,RBM15,MAFB,ICOS,CD40LG,AIRE,PPP2R3C,CCR4,SLC40A1,LILRB2,CBLB,TGFBR2,PRDX2,ATM,ABL1,BCL6,RCBTB2,BATF,FOXI3,MSH3,ATAD5,CTC1,EPHB3,SLC15A4,SIX4,CLCF1,SWAP70,CTNNBL1,C…
GO:BP	nucleus organization	GO:0006997	FALSE	0.0003683009398164523	3.433797172927388	147	6042	72	21026	SRPK1,ACTR6,DMRTC2,TOR1A,PAFAH1B1,PLEC,RTN4,BROX,PHF2,TOR1AIP1,CHMP2A,ZMPSTE24,CHMP3,CHMP1B,NUMA1,HMGB2,ETS1,TBPL1,SUMO1,SF1,PYGO2,VPS4B,UBXN2B,SPAST,CHMP7,DDX11,BANF1,FXR1,TMF1,DMPK,NUP153,SRPK2,PLK1,EMD,AGFG1,RRN3,DES,REEP3,NEK6,CHMP1A,BIN1,EPC1,CHMP2B,CHMP5,TPR,LMNB2,DCTN1,CHMP4A,NUP155,NUP93,NOLC1,PRKCB,KAT5,SUV39H1,PRKCA,SIRT1,CHMP4B,PITPNB,TARDBP,NUP205,RRP8,PARP11,RNF8,NUP107,ANKLE2,REEP4,…
GO:BP	NADH dehydrogenase complex assembly	GO:0010257	FALSE	0.0003922921164458068	3.4063904194220473	63	6042	38	21026	NDUFS4,NDUFAF4,NDUFB1,NDUFA1,NDUFB4,NDUFA2,NDUFB3,NDUFB6,NDUFAF1,ND5,ND4,NDUFB5,NDUFA8,TAZ,NDUFC1,NDUFS2,NDUFB11,NDUFC2,NDUFB10,ND2,NDUFB7,AIFM1,NDUFA9,NDUFS7,NDUFA12,NDUFA11,NDUFS5,NDUFB2,NDUFAF8,NDUFS3,ECSIT,NDUFS8,NDUFAF3,DMAC2,NDUFB9,NDUFAB1,MT-ND1,DMAC1
GO:BP	mitochondrial respiratory chain complex I assembly	GO:0032981	FALSE	0.0003922921164458068	3.4063904194220473	63	6042	38	21026	NDUFS4,NDUFAF4,NDUFB1,NDUFA1,NDUFB4,NDUFA2,NDUFB3,NDUFB6,NDUFAF1,ND5,ND4,NDUFB5,NDUFA8,TAZ,NDUFC1,NDUFS2,NDUFB11,NDUFC2,NDUFB10,ND2,NDUFB7,AIFM1,NDUFA9,NDUFS7,NDUFA12,NDUFA11,NDUFS5,NDUFB2,NDUFAF8,NDUFS3,ECSIT,NDUFS8,NDUFAF3,DMAC2,NDUFB9,NDUFAB1,MT-ND1,DMAC1
GO:BP	positive regulation of reactive oxygen species metabolic process	GO:2000379	FALSE	0.00040665712526253737	3.3907716137853456	70	6042	41	21026	GADD45A,SIRPA,CYP1B1,THBS1,MAPK14,F2RL1,CD177,AKR1C3,TP53,GNAI2,PDGFB,ITGB2,PLCG2,TSPO,FOXO3,TYROBP,RIPK1,ROMO1,ITGAM,TLR4,RAB27A,CYBA,SYK,GSTP1,CD36,CDKN1A,TGFBR2,CBR1,DHRS4,PRKCE,ADGRB1,AKR1C1,DCXR,ELAVL1,TGFB1,CLEC7A,TLR6,SLC5A3,ZNF205,PARK7,SOD1
GO:BP	chemical homeostasis	GO:0048878	FALSE	0.0004328693238731905	3.3636431902197605	1043	6042	374	21026	HK2,CACNB2,RORA,IGF1R,PNPLA2,CSRP3,ASPH,ELANE,CEBPA,RHD,TRPM2,CES1,XCL1,CLIC4,CYBRD1,PRKACB,ALAS2,RHCE,TBXAS1,IRS2,ANKRD9,ITGB3,GP1BA,TESMIN,SLC24A3,ASGR2,ATP7B,SUCNR1,AQP1,ABCD1,NR1D2,PDK4,FECH,GP1BB,CCR5,GRINA,MYC,RYR1,HK3,LAMP1,HERPUD1,CALM2,ATP6V1D,SLC34A1,ORMDL2,DIAPH1,RTN4,PLSCR3,TMBIM6,PRCP,GSTM2,EPAS1,CRTC2,FBXL5,PNPLA8,LCAT,STXBP3,KCNQ1,PTPRC,TRIM24,PICALM,CREG1,ATP6V0E1,CCDC47,AQP3,PLCG…
GO:BP	response to endogenous stimulus	GO:0009719	FALSE	0.0004658198347691876	3.331782022998828	1489	6042	515	21026	RETN,GRB10,TIMP2,NDST1,IGF1R,VEGFC,CSRP3,TRIM71,TNS2,FGF9,SORT1,RAB13,TGFBR3,PRLH,AGTRAP,CES1,XCL1,SH2B2,DDX17,CTSD,FUT8,HTRA1,TLR2,CYFIP1,LTBP1,CYP1B1,IRS2,THBS1,MAPK14,ITGB3,HSP90AB1,ECHDC3,INHBA,SPHK1,TSHB,SOX6,AQP1,NR1D2,PDK4,ITGB5,AKR1C3,PTPRK,TNFAIP6,ADM,FECH,CD63,MYC,STAT4,GNB1,GSK3A,CTBP2,YY1,ARPC3,SLC34A1,TADA3,TP53,CHUK,SAFB2,CUL3,LTBP3,GNAI2,PTPN12,EIF4EBP2,APC,IER2,ROCK1,PRCP,PXN,CASP…
GO:BP	regulation of B cell differentiation	GO:0045577	FALSE	0.00046792419541342246	3.3298244977382323	35	6042	25	21026	IKZF3,FCRL3,CR1,INHBA,CD27,INPP5D,NFAM1,ZFP36L1,STAT5B,TLR9,IL10,SYK,BTK,CARD11,ZFP36L2,PPP2R3C,BCL6,INHA,NCKAP1L,PTPN6,IL2RG,BAD,DDRGK1,IL4I1,SFRP1
GO:BP	regulation of extrinsic apoptotic signaling pathway	GO:2001236	FALSE	0.0005350984437651607	3.271566312089072	156	6042	75	21026	NRG1,THBS1,INHBA,SIAH2,TNFSF12,PTPRC,TGFBR1,BCL2L12,SP100,HYAL2,HMGB2,RET,FADD,STX4,BID,RIPK1,HMOX1,PYCARD,HSPA1A,STK3,PPP2R1A,PAK2,RFFL,PMAIP1,TLR4,STK4,TMC8,ITPRIP,RB1CC1,IL1B,GSTP1,ACVR1,GPX1,STRADB,IGF1,GSK3B,MAL,RNF34,TRAF1,ITM2C,LGALS3,PRDX2,TNFRSF12A,SH3RF1,CTNNA1,FGFR1,FGG,SKIL,PF4,CX3CL1,NOL3,AKT1,PEA15,ZC3HC1,WWOX,BMPR1B,DEDD2,PAK5,MAPK7,TRAF2,PDIA3,FAF1,TERT,EYA1,PPP1CA,BIRC6,MADD,TLR6…
GO:BP	nuclear envelope organization	GO:0006998	FALSE	0.0005484056617578048	3.26089807018909	59	6042	36	21026	TOR1A,PAFAH1B1,BROX,TOR1AIP1,CHMP2A,ZMPSTE24,CHMP3,CHMP1B,VPS4B,UBXN2B,SPAST,CHMP7,BANF1,DMPK,PLK1,EMD,DES,REEP3,NEK6,CHMP1A,CHMP2B,CHMP5,LMNB2,DCTN1,CHMP4A,NUP155,NUP93,PRKCB,PRKCA,CHMP4B,TARDBP,PARP11,ANKLE2,REEP4,CHMP6,CTDNEP1
GO:BP	protein-containing complex disassembly	GO:0032984	FALSE	0.0005532252712325717	3.25709798961446	257	6042	112	21026	IRAK3,STX17,IGF1R,ASPH,MTRF1,IRGM,KIF21A,F2RL1,EIF5A2,SH3BP1,DNAJC6,MYC,PIK3C3,SPTAN1,CAPZA1,ARID1A,KIF5B,APC,HMGA1,TSG101,UBQLN1,PHF23,CHMP2A,UPF1,ZMPSTE24,CHMP3,STMN3,SUPT16H,MID1IP1,CHMP1B,PIK3CA,MICAL3,ATG12,VPS4B,SPAST,CHMP7,SCAF4,ADD3,TOM1,CAMSAP1,PLEK,NFE2,GABARAPL2,OGFOD1,KIF24,SMARCD3,ATG5,LAMP2,NSF,HDAC6,CHMP1A,CAPZA2,GSK3B,SMARCD1,VCP,SNAPIN,ETF1,MAP1LC3B,CHMP2B,CALCOCO2,CFL1,GABARAPL1…
GO:BP	positive regulation of MAPK cascade	GO:0043410	FALSE	0.0005659409342213588	3.2472288926285127	456	6042	181	21026	NDST1,IGF1R,S100A12,GADD45A,TNIK,ELANE,FGF9,EGF,MARCO,NRG1,FCRL3,THBS1,ITGB3,INHBA,SPHK1,F2RL1,NAIP,PDE6H,LAMTOR2,CDC42,CD27,MINK1,GNAI2,MAP3K3,ROCK1,TAOK3,DOK1,PDGFB,PTPRC,MFHAS1,RNF13,PLCG2,PDCD10,MAP3K5,GLIPR2,RAP1B,VEGFA,TRAF6,MAP4K1,RAP1A,IQGAP1,ADAM8,JAK2,RELL2,TRAF7,GADD45B,MAP2K4,LYN,FGFR4,RET,PIK3CG,LRRK2,TRAF4,GPR183,SPAG9,RIPK1,GADD45G,PYCARD,STK3,XIAP,TLR9,NMNAT1,ARL6IP5,MAP2K3,RASSF2…
GO:BP	exocytosis	GO:0006887	FALSE	0.0006142696654376495	3.2116409309743066	360	6042	148	21026	STX17,FCER1A,SYTL2,RAB13,SYP,GAB2,F2RL1,CD177,LAMP1,GNAI2,EXOC6,STXBP3,ITGB2,TSG101,TMEM167A,DNAJC5,HGS,CD300A,CHMP2A,RAP1B,ARFGEF1,ANK1,FGR,RAP1A,RAB7A,MICAL3,VPS18,LYN,RAB21,PIK3CG,LRRK2,RAB10,C9ORF72,STX4,TSPAN18,RAB2B,COPS5,TNFAIP2,VPS4B,FCGR3A,EXOC3,ITGAM,VAMP3,PAK1,RALB,OSBPL2,RAB27A,PRRT2,RAB5A,PLEK,ARL8B,RPH3AL,EXOC8,ATP13A2,SYK,RAB11B,SYT15,NSF,VTI1B,FES,WNT7A,RAB11FIP1,SDCBP,TMEM167B,RA…
GO:BP	mitotic cytokinesis	GO:0000281	FALSE	0.000645631449353492	3.190015322852248	95	6042	51	21026	MTMR3,CDCA8,APC,ROCK1,EXOC6,CHMP2A,LZTS2,CHMP3,SEPT6,IQGAP1,CHMP1B,JTB,CNTROB,RAB35,SNX18,VPS4B,SPAST,CHMP7,EXOC3,MTMR4,EXOC8,PLK1,CHMP1A,KIF20B,EFHC1,ANK3,MAP9,EXOC2,ANKRD53,CHMP2B,CFL1,RHOB,IQGAP3,INCENP,CHMP5,CUL7,MITD1,UNC119,CHMP4A,RAB11FIP3,NUP62,POLDIP2,STAMBP,CHMP4B,ZFYVE26,CKAP2,ARF6,RAB11A,SON,KLHDC8B,CHMP6
GO:BP	regulation of proteolysis involved in protein catabolic process	GO:1903050	FALSE	0.0007628202373780535	3.1175777937788487	236	6042	104	21026	PYHIN1,XPO1,TTC36,CEBPA,EGF,TRIB2,EPHA4,HSP90AB1,CLU,RPS7,PSMF1,GSK3A,WAC,HERPUD1,RNF139,UBE2K,PSMC1,UBQLN1,ZER1,USP38,TMX1,SUMO1,RAD23B,TRAF7,LRRK2,Q16594,HSPA1A,USP13,PTEN,TMF1,DYX1C1,GABARAPL2,CBFA2T3,AGTPBP1,PLK1,USP14,PSME1,USP25,GPX1,RFPL1,GSK3B,BTRC,FMR1,PINK1,EIF3H,VCP,CDK2,SH3RF1,UBQLN2,GABARAP,PRICKLE1,FBXW7,RCHY1,CHFR,WNT1,TGFB1I1,AKT1,WNT10B,MAGEF1,HSPBP1,TF,USP19,CCDC22,CSNK2A2,UBQLN…
GO:BP	monosaccharide metabolic process	GO:0005996	FALSE	0.0007742799405342767	3.111101991967414	250	6042	109	21026	HK2,PFKFB2,RORA,FUT8,IRS2,SLC23A1,MAPK14,PFKFB4,PDK4,G6PD,TKTL1,HK3,GSK3A,TP53,GAA,SERP1,CRTC2,PPP1R3E,PGM2,KCNQ1,FPGT,BRAT1,ZMPSTE24,SIK1,FBP1,NR3C1,PIK3CA,CHST15,PFKFB1,PGD,KAT2A,PMAIP1,ENO3,UXS1,MPI,POFUT2,LEPR,EPM2AIP1,PGM1,FGGY,PGK1,SLC23A2,PPP1R3B,NLN,FOXO1,ENO2,GALK2,GLB1,IGFBP3,IGF1,SLC37A4,PRKAA1,GALT,PDK1,FUCA1,SORD,IGFBP4,PDK3,FUT6,PFKP,PGAM1,SESN2,CLK2,DGKQ,ALDOC,PDX1,AKT1,DYRK2,PHKA1…
GO:BP	TORC1 signaling	GO:0038202	FALSE	0.0008110706849323579	3.0909412953099697	103	6042	54	21026	RRAGD,PRKACB,WAC,LAMTOR2,SEC13,CUL3,SZT2,RHEB,FNIP1,WDR59,UBE2W,RRAGA,USP4,C9ORF72,STAMBPL1,LAMTOR3,SAR1A,NPC1,SYK,YWHAZ,PRKAA1,PIM1,RRAGC,CARD11,TBK1,SIK3,SESN1,ATM,SRMS,SAR1B,KLHL22,MFSD8,ITFG2,SESN2,TSC1,PELI1,YWHAG,DGKQ,AKT1,DEPDC5,CTNS,USP32,RRAGB,RBX1,GPR137,AKT1S1,LAMTOR4,MLST8,PPDPF,OTUB1,PIH1D1,WDR24,STK11,PRMT1
GO:BP	protein polymerization	GO:0051258	TRUE	0.0008138702223697792	3.089444841059308	284	6042	121	21026	EVL,HAX1,PSTPIP2,TUBGCP5,NME7,CDK5R1,CYFIP1,CENPJ,KIF21A,RNF135,ARPC2,ARPC3,SPTAN1,DIAPH1,MAPRE1,CAPZA1,UBE2K,MECP2,PREX1,ARPC5,TUBG2,CHMP2A,SSH1,CLIP3,CHMP3,ARFGEF1,MID1IP1,VASP,CLIP1,NUMA1,NDEL1,JAK2,CDKN1B,DYRK1A,BAG4,HCLS1,COTL1,PYCARD,HSPA1A,TUBGCP4,ADD3,CYFIP2,PAK1,NIN,CAMSAP1,PLEKHG2,MSRB2,RANBP9,FES,HAUS3,NEDD1,BIN1,CCDC57,CAPZA2,CORO7,PDE4DIP,PINK1,MYADM,ANKRD53,NDE1,HAUS8,INF2,ABL1,HCK,…
GO:BP	actin filament-based process	GO:0030029	FALSE	0.000847097636216733	3.0720665301339967	825	6042	302	21026	CACNB2,KCNE1,EVL,CSRP3,HAX1,TNIK,PSTPIP2,CDK5R1,PGM5,TRPM2,RAB13,SH2B2,FGD4,MYL9,TNNT1,SHTN1,RHOH,CYFIP1,DSC2,ITGB3,HIP1,AQP1,F2RL1,ITGB5,SH3BP1,EPDR1,ACTR2,ACTR3,ARPC2,ARPC3,CDC42,MARCKSL1,SPTAN1,BRK1,PAFAH1B1,DIAPH1,PLEC,MINK1,CAPZA1,CUL3,ROCK1,PXN,SPECC1,NEB,ARHGAP26,KCNQ1,TGFBR1,PREX1,TNFAIP1,ARPC5,TNNC1,RHOQ,SSH1,MYO5A,MKLN1,FSCN1,ARFGEF1,VASP,SETD3,IQGAP1,ABI2,JAK2,TPM4,OBSCN,PIK3CA,SUMO1,M…
GO:BP	regulation of small GTPase mediated signal transduction	GO:0051056	FALSE	0.0008577123796389954	3.066658321564993	307	6042	129	21026	GPR18,SIPA1L2,GPR174,SH2B2,FGD4,F2RL1,SH3BP1,SCAI,ARHGAP1,CUL3,RTN4,GIT2,VAV3,ARHGAP26,PREX1,PLEKHG3,PICALM,TNFAIP1,STK19,STMN3,ARFGEF1,ARHGAP27,ABR,GNA13,FBP1,OBSCN,PIK3CG,DENND1A,MCF2L,PLEKHG4,RABL3,CCDC125,RHOF,ARHGDIB,ARHGEF1,IQSEC1,ITGA3,SPRY3,VAV1,LZTR1,ARHGAP19,ARHGAP42,SOS2,FGD1,PLEKHG1,IGF1,NOTCH2,ARHGAP32,RALBP1,F11R,GMIP,BCR,FGD3,SEMA4D,SHOC2,KRAS,DENND3,KBTBD7,ERBB2,DOCK8,GABARAP,ABL1…
GO:BP	reactive oxygen species metabolic process	GO:0072593	FALSE	0.0008769549874773115	3.0570226976167545	231	6042	102	21026	HK2,GADD45A,HP,ABCD2,NDUFS4,MPO,SIRPA,CYP1B1,THBS1,MAPK14,ABCD1,F2RL1,PDK4,G6PD,CD177,AKR1C3,TP53,GNAI2,PRCP,PDGFB,ITGB2,PREX1,TUSC2,ATP7A,PLCG2,ARF4,UCP2,ALOX5,TSPO,TXN,CYB5R4,NCF2,FOXO3,TYROBP,LRRK2,SH3PXD2A,RIPK1,ROMO1,ITGAM,PMAIP1,TLR4,RAB27A,CYBA,IER3,SYK,ATG5,ACOX1,HDAC6,VAV1,GSTP1,FOXO1,NOXA1,GPX1,CD36,PINK1,TRAP1,CDKN1A,PRDX5,BCR,FBLN5,PDK3,PARL,TGFBR2,CBR1,SESN1,PRDX2,PRDX3,COL6A1,SESN2,…
GO:BP	vesicle budding from membrane	GO:0006900	FALSE	0.0009325964191398328	3.0303062564247356	86	6042	47	21026	SEC31B,PPP6C,SEC13,CUL3,PICALM,RAB7A,PDCD6,RAB1A,SEC23A,MYO18A,CHMP7,SAR1A,AP3M2,SURF4,TRAPPC3,AP3S1,SEC24C,TMED2,SNX3,KLHL12,TRAPPC8,AP1G1,SAR1B,CHMP5,TRAPPC1,SEC24D,GOLPH3L,ANXA2,CHMP4A,FNBP1L,GBF1,TBC1D20,SEC31A,TFG,MIA3,CHMP4B,PARK2,ARFGAP2,AP3D1,WASL,SEC24A,TRAPPC6A,MAPK15,CHMP6,PEF1,AP2M1,AP3S2
GO:BP	glucan metabolic process	GO:0044042	FALSE	0.0009325964191398328	3.0303062564247356	86	6042	47	21026	GRB10,WIPI1,IRS2,GBE1,GSK3A,GAA,PPP1R3E,PGM2,UGP2,PPP1R3D,ATG12,STK40,NR1D1,INPP5K,NPC1,LEPR,EPM2AIP1,RB1CC1,PPP1R3B,WIPI2,GYG1,ATG3,IGF1,GSK3B,SLC37A4,PHKA2,PYGL,PRKAG2,GABARAPL1,IL6ST,MGAM,PPP1R3C,AKT1,DYRK2,PHKA1,KHK,ENPP1,WDR45,PPP1CA,PHKB,PYGB,PER2,PHKG2,STBD1,POMC,COMT,PPP1R3F
GO:BP	negative regulation of metabolic process	GO:0009892	FALSE	0.00096308524788051	3.0163352694221817	3375	6042	1090	21026	MAFG,GPR18,TDRD9,GRB10,HK2,IRAK3,ITM2A,TIMP2,ZNF134,PTX3,KLF12,TSHZ3,TTC36,ARG1,BPI,GADD45A,ZNF141,LTF,BCL7A,HP,EOMES,ABCD2,TRIM71,MIS18A,CDK5R1,ELANE,CEBPA,FGF9,GPR174,ATXN1L,RRAGD,XCL1,ABCC2,TRIB2,DDX17,PGLYRP1,NRG1,SIRPA,EPHA4,PIWIL4,CYFIP1,FCRL3,IRS2,THBS1,TIGIT,MAPK14,SATB1,CD83,ITGB3,HSP90AB1,GZMA,ACTR6,IL1R2,PPP1R26,MRPL13,CLU,CR1,SLC24A3,INHBA,TBX21,IFI27,IRGM,SLC7A5,SPHK1,SOX6,CEP78,RPS7…
GO:BP	positive regulation of innate immune response	GO:0045089	FALSE	0.000979170138214147	3.0091418396905167	374	6042	152	21026	IRAK3,SH2D1A,PYHIN1,LTF,CLEC4E,TLR2,FCRL3,IRGM,F2RL1,RNF135,NAIP,KLRC4,LAMP1,ZDHHC3,PPP6C,UFD1L,CHUK,RTN4,UBE2K,MFHAS1,UBQLN1,TRIM41,CD300A,PLCG2,TRAF6,NFKBIA,MED1,SARM1,ADAM8,HMGB2,RIOK3,TLR8,TAX1BP1,STAT5B,LYN,TYROBP,IRF3,IRF4,FADD,PYCARD,HSPA1A,XIAP,TLR9,PAK2,BANF1,NR1H4,TLR4,NINJ1,PAK1,NR1D1,NMI,TLR1,CYBA,SMPDL3A,TRIM25,HMGB1,SYK,LSM14A,GLTPD1,NLRX1,ZDHHC12,PUM2,LY96,LAMP2,VAV1,MAPKAPK3,DHX9,…
GO:BP	positive regulation of cell differentiation	GO:0045597	FALSE	0.001005609087028936	2.9975708108703354	879	6042	319	21026	IL7R,VCAN,LTF,VEGFC,CSRP3,HAX1,ALOX15B,CEBPA,MAML1,SHTN1,RHOH,NRG1,TCF4,S100B,EPHA4,TLR2,CYFIP1,MAPK14,CD83,HSP90AB1,CR1,INHBA,SLC7A5,SOX6,ADM,CD101,HAPLN2,CD27,OLFM2,PAFAH1B1,VEZF1,NFKBID,ARID1A,LTBP3,KDM4A,INPP5D,PTPRC,TGFBR1,MECP2,ZMIZ1,RHEB,MAPK11,WDFY2,MAP3K5,GLIPR2,RB1,VEGFA,TRAF6,CLIC1,TSPO,SETD3,ZFP36L1,RAP1A,MED1,ADAM8,NUMA1,HMGB2,ETS1,JAK2,STAT5B,HDAC2,SERPINF1,ZFYVE27,CD46,RCOR1,BCL9L,…
GO:BP	B cell differentiation	GO:0030183	FALSE	0.0010122324160493194	2.9947197588214207	158	6042	75	21026	ITM2A,IKZF3,FCRL3,CR1,INHBA,MS4A1,YY1,CD27,TP53,INPP5D,PTPRC,SP3,PLCG2,FNIP1,SLC25A5,RBPJ,NFAM1,ZFP36L1,STAT5B,GPR183,HDAC4,TLR9,IL10,SYVN1,RABL3,TRAF3IP2,PLCL2,FOSL2,LRRC8A,SYK,CD79B,MALT1,LFNG,BTK,NOTCH2,CARD11,POU2F2,CD79A,CD40LG,CD19,TCIRG1,DOCK11,ZFP36L2,ST3GAL1,PPP2R3C,ATM,ITFG2,ABL1,BCL6,BLNK,PIK3R2,HHEX,NTRK1,IRF8,GPS2,C17ORF99,CLCF1,IGHM,INHA,CR2,ZBTB7A,NCKAP1L,NHEJ1,DOCK10,PTPN6,IL2RG,B…
GO:BP	purine-containing compound biosynthetic process	GO:0072522	FALSE	0.0010789830055524926	2.9669853955885435	257	6042	111	21026	NME7,NDUFS4,AK3,PDK4,NDUFB1,GMPR2,NDUFA1,NDUFB4,NDUFA2,NDUFB3,PGM2,NDUFB6,IMPDH1,NPR2,ND5,ATP6V0C,ATP6,ATP5J,NMNAT1,SDHB,SDHD,DNAJC30,NADK,ND4,NDUFB5,ATP6V1A,NDUFA8,AK4,TMSB4X,TAZ,NDUFS6,TPK1,NDUFC1,NT5E,SDHC,NDUFS2,PANK2,DCAKD,HPRT1,PINK1,NDUFB11,PDK1,VCP,ACSL6,PRKAG2,ELOVL4,PAICS,NDUFC2,PDK3,IMPDH2,NAMPT,NPPA,HAAO,NDUFB10,ND2,PPAT,NDUFV2,NDUFB7,KYNU,KMO,IDO2,ADCY2,FASN,NDUFA9,ATIC,GMPS,ACACA,SD…
GO:BP	stress granule assembly	GO:0034063	FALSE	0.0011739822666946972	2.930338463169158	34	6042	24	21026	CSDE1,YTHDF3,DAZAP2,STYXL1,C9ORF72,ATXN2,OGFOD1,LSM14A,ATG5,PUM2,FMR1,PRKAA1,BICD1,HSF1,USP10,PRRC2C,UBAP2L,ATXN2L,CIRBP,DYNC1H1,YTHDF2,G3BP1,DDX6,RPS23
GO:BP	macrophage activation	GO:0042116	FALSE	0.001189721346568654	2.9245547460181496	109	6042	56	21026	MMP8,RORA,BPI,CEBPA,TLR2,THBS1,AZU1,CLU,IRGM,SUCNR1,SPHK1,ITGB2,PTPRC,MFHAS1,PLCG2,GRN,JAK2,TYROBP,LRRK2,TLR9,MYO18A,TRPV1,FCGR3A,CX3CR1,ITGAM,IL10,IFNGR1,TLR4,CRTC3,NR1D1,NMI,TLR1,SYK,APP,SPACA3,JMJD6,FCER2,NR1H3,C5AR1,IFNGR2,ATM,CX3CL1,PLA2G4A,TTBK1,IL1RL1,PRKCE,IL31RA,TICAM1,TMEM229B,TLR3,TLR6,IL4,NAGLU,TNIP2,CCL3,KARS1
GO:BP	positive regulation of establishment of protein localization	GO:1904951	FALSE	0.0012777175773611333	2.893565130644142	329	6042	136	21026	PFKFB2,FZD5,VEGFC,ASPH,CDK5R1,ABAT,TLR2,IRS2,MAPK14,CENPJ,F2RL1,GSK3A,CDC42,HDAC3,TMEM30A,UBE2D3,SERP1,SH3GLB1,EDEM1,ITGB2,TSG101,PTPN23,PDCD10,HYAL2,ADAM8,JAK2,TRIM28,HSPA1L,APBB1,MFF,OAZ1,STX4,TTN,HCLS1,MYO18A,PLA2G6,ITGAM,SAR1A,XPO4,NR1H4,TLR4,UBL5,ORAI1,RPH3AL,ATP13A2,NADK,LRRC8A,PRKAR1A,OSBP,IL1B,BLK,EMD,SYBU,HUWE1,SMAD3,PRKCZ,KIF20B,IGF1,GSK3B,MYO1C,PRKAA1,ANK3,PINK1,CDH1,GIPR,BBC3,ERBB2,VP…
GO:BP	mitochondrial translation	GO:0032543	FALSE	0.0013919380198094665	2.8563801025516216	130	6042	64	21026	MTRF1,MRPL13,MRPS28,MRPS18C,MRPL33,CHCHD1,MRPL38,MTG1,RPUSD3,QRSL1,AARS2,MRPS6,MRPS35,AURKAIP1,MRPL28,SHMT2,NSUN3,RARS2,MRPL20,CDK5RAP1,LARS2,TARS2,TRUB2,MRPL19,MRPL22,MRPS5,MRPS18B,NGRN,PTCD1,IARS2,MRPS33,TUFM,MRPS26,MRPL17,MRPL3,ALKBH1,MRPL40,MRPL52,MRPS34,COA3,MRPL27,MRPL14,MRPL48,MRPL12,MRPL51,GADD45GIP1,MRPL57,MRPL11,MRPS18A,MRPL54,MRPL41,MRPL55,MRPL2,MRPL21,MRPS15,MRPL24,MRPS2,MRPL37,MRPL34…
GO:BP	regulation of secretion by cell	GO:1903530	FALSE	0.0013927380339640615	2.856130564195537	563	6042	215	21026	RETN,PFKFB2,VEGFC,ABAT,ADORA3,TLR2,IRS2,INHBA,GAB2,F2RL1,CD177,MCTP1,LAMP1,GNAI2,SERP1,STXBP3,ITGB2,TSG101,HGS,CD300A,PTPN23,CHMP2A,RAP1B,MIDN,UCP2,ALOX5,TSPO,FGR,RAP1A,ENY2,RAB7A,ADAM8,JAK2,ARFIP1,VPS18,LYN,APBB1,RAB21,LRRK2,PIM3,C9ORF72,STX4,TTN,RAB2B,VPS4B,MYO18A,PLA2G6,ACVR1C,ITGAM,VAMP3,NR1H4,TLR4,SLC9B2,RAB27A,RFX3,ORAI1,GABBR1,TMF1,NR1D1,RAB5A,SDHD,RPH3AL,ATP13A2,OSM,NADK,BMP2,LRRC8A,SYK,P…
GO:BP	vesicle localization	GO:0051648	FALSE	0.001407237818007285	2.8516325021952884	219	6042	97	21026	WIPI1,TOR1A,PPP6C,PAFAH1B1,CUL3,KIF5B,KIF1C,EXOC6,TSG101,MECP2,PICALM,HGS,CHMP2A,MYO5A,BLOC1S3,FAM91A1,RAB7A,NDEL1,PDCD6,RAB1A,PIK3CG,LRRK2,COPS5,VPS4B,CTNNB1,EXOC3,CTBP1,SAR1A,AP3M2,PTEN,RAB27A,TRAPPC3,FBXW11,EXOC8,ATP13A2,TRIM46,RAB11B,AP3S1,SYBU,TMED2,KLHL12,SDCBP,PRKCZ,TRIP11,MYO1C,PINK1,RAB3A,TRAPPC8,SYN2,STARD3,EXOC2,SNAPIN,BBS5,KIF5C,LIMK2,AP3B1,TCIRG1,NDE1,HAP1,AP1G1,SNF8,SAR1B,KIF13A,MAP…
GO:BP	regulation of cell migration	GO:0030334	FALSE	0.0014583230232228803	2.83614626774298	960	6042	344	21026	GPR18,CEACAM6,IGF1R,EVL,GADD45A,VEGFC,ALOX15B,ELANE,FGF9,TGFBR3,ADORA3,XCL1,CLIC4,ITGA2B,EGF,MMP9,SHTN1,EPHA4,CYP1B1,IRS2,THBS1,SELP,ITGB3,GP1BA,C3AR1,SEMA4A,IL1R1,SPHK1,MPP1,AQP1,F2RL1,DOCK4,DPP4,NTNG2,SH3BP1,SCAI,PTPRK,PLA2G7,TNFAIP6,RRAS2,MCTP1,MIIP,CDC42,MINK1,RTN4,GNAI2,APC,MAP3K3,ROCK1,PRCP,YTHDF3,IGSF8,PDGFB,SAP30,SAP130,PTPRC,TGFBR1,MECP2,PREX1,PLEKHG3,SAP30L,EPPK1,CD300A,PTPN23,PLCG1,ZNF…
GO:BP	autophagosome maturation	GO:0097352	FALSE	0.0014607401298547377	2.83542703951306	63	6042	37	21026	STX17,IRGM,PIK3C3,TSG101,UBQLN1,PHF23,CHMP2A,CHMP3,CHMP1B,ATG12,VPS4B,CHMP7,TOM1,GABARAPL2,ATG5,LAMP2,CHMP1A,VCP,SNAPIN,MAP1LC3B,CHMP2B,CALCOCO2,GABARAPL1,MFSD8,GABARAP,CHMP5,CHMP4A,UBQLN4,MAP1LC3A,SNAP29,EPG5,CHMP4B,UVRAG,PIK3R4,ATP2A2,VAMP8,CHMP6
GO:BP	innate immune response-activating signaling pathway	GO:0002758	FALSE	0.001526850275180383	2.81620354830773	284	6042	120	21026	IRAK3,LTF,CLEC4E,TLR2,FCRL3,IRGM,F2RL1,RNF135,NAIP,KLRC4,ZDHHC3,PPP6C,UFD1L,CHUK,RTN4,MFHAS1,UBQLN1,CD300A,PLCG2,TRAF6,NFKBIA,SARM1,RIOK3,TLR8,TAX1BP1,LYN,TYROBP,IRF3,IRF4,PYCARD,HSPA1A,XIAP,TLR9,PAK2,BANF1,NR1H4,TLR4,NINJ1,PAK1,NR1D1,NMI,TLR1,CYBA,SMPDL3A,TRIM25,HMGB1,SYK,LSM14A,GLTPD1,NLRX1,ZDHHC12,PUM2,LY96,LAMP2,MAPKAPK3,AIM2,CD36,IKBKB,NR1H3,BTK,NEK7,RNF34,SLC46A2,BRCC3,TBK1,LACC1,CASP1,USP1…
GO:BP	positive regulation of locomotion	GO:0040017	FALSE	0.0015452683522176557	2.810996089852604	603	6042	228	21026	CEACAM6,IGF1R,VEGFC,FGF9,TGFBR3,XCL1,ITGA2B,EGF,MMP9,SHTN1,EPHA4,CYP1B1,IRS2,THBS1,SELP,ITGB3,AZU1,C3AR1,SEMA4A,IL1R1,SUCNR1,SPHK1,AQP1,F2RL1,DOCK4,PLA2G7,TNFAIP6,RRAS2,CDC42,RTN4,GNAI2,APC,MAP3K3,IGSF8,PDGFB,PTPRC,TGFBR1,PREX1,PGAM4,PLCG1,ZNF580,ATP7A,PLCG2,SSH1,PDCD10,F7,GRN,GLIPR2,VEGFA,MAZ,TNFRSF14,FGR,SLC26A5,ADAM8,PDCD6,ETS1,JAK2,CCR6,LYN,RET,DAPK3,PIK3CG,MOSPD2,FADD,STX4,SPAG9,BAG4,HMOX1,P…
GO:BP	retrograde vesicle-mediated transport, Golgi to endoplasmic reticulum	GO:0006890	FALSE	0.0016485997682690382	2.7828847655377396	54	6042	33	21026	COPB2,KIF1C,COG7,ARF4,SEC22B,ARF5,KDELR2,BICD2,BET1L,COPZ1,SCYL1,COPA,ERGIC1,NBAS,SCFD1,RER1,RAB6B,GOLPH3L,COG4,RAB6D,STX18,GBF1,PITPNB,UVRAG,ERGIC2,ERGIC3,COPE,KDELR1,USE1,STX5,TMEM115,LMAN2,COPZ2
GO:BP	osteoclast differentiation	GO:0030316	FALSE	0.0017486335468707445	2.757301194092945	110	6042	56	21026	LTF,MAPK14,GAB2,OSCAR,TNFAIP6,PAFAH1B1,INPP5D,OSTM1,ATP6AP1,TRAF6,SNX10,TYROBP,CAMK4,GPR183,SH3PXD2A,P2RX5,RASSF2,CTNNB1,LILRB3,LILRB4,TLR4,SLC9B2,UBASH3B,FOSL2,CEBPB,FAM20C,IREB2,BMP2,IL23R,CREB1,SIGLEC15,NOTCH2,GPC3,SLC4A2,MAFB,TFE3,TCIRG1,FBXW7,TCTA,ANXA2,POU4F1,FARP2,TF,TLR3,TGFB1,TMEM64,KLF10,PIAS3,CD81,FSTL3,GPR137,BGLAP,LRRC17,IL4,SFRP1,CCL3
GO:BP	cell motility	GO:0048870	FALSE	0.0017588610322012248	2.7547684728406363	1793	6042	605	21026	GPR18,GRB10,APCDD1,CEACAM6,IGF1R,VCAN,S100A12,EVL,GADD45A,PLTP,VEGFC,EOMES,ALOX15B,NME7,CDK5R1,ELANE,FGF9,TRPM2,RAB13,TGFBR3,ADORA3,XCL1,CLIC4,ITGA2B,RSPH9,EGF,HSD3B7,MMP9,SHTN1,SLC22A14,FUT8,SIRPA,KIAA0319,CXCR6,EPHA4,CYP1B1,IRS2,THBS1,SELP,ITGB3,AZU1,GP1BA,TBX21,C3AR1,SEMA4A,IL1R1,SPHK1,MPP1,CEP78,AQP1,S100P,F2RL1,DOCK4,DPP4,ITGB5,NTNG2,SH3BP1,CD177,PF4V1,SCAI,PTPRK,PLA2G7,TNFAIP6,SLC22A16,RRAS…
GO:BP	cellular response to nutrient levels	GO:0031669	FALSE	0.0018285601851407817	2.737890740743287	248	6042	107	21026	IGF1R,PRKAB2,OTUD3,WIPI1,RRAGD,DSC2,INHBA,SLC7A5,PLIN3,PDK4,AKR1C3,MTMR3,TFEB,PIK3C3,SLC34A1,SEC13,TP53,SZT2,TNRC6A,USP33,SH3GLB1,TRIM24,PPM1D,RHEB,MAP3K5,FNIP1,WDR59,UCP2,MED1,RRAGA,FOXO3,LRRK2,RXRA,MYBBP1A,EHMT2,VPS41,YME1L1,USF2,SAR1A,PMAIP1,RALB,SNW1,NUAK2,GABARAPL2,VDR,ATG5,YWHAZ,LAMP2,FES,WIPI2,PIK3C2B,MAPK1,FOXO1,GDAP1,FAS,PRKAA1,PIM1,RRAGC,ATG7,CDKN1A,PRKAG2,MAP1LC3B,SESN1,ALB,GABARAPL1,S…
GO:BP	response to molecule of bacterial origin	GO:0002237	FALSE	0.001864489813380404	2.729439985059319	357	6042	145	21026	MMP8,IRAK3,FZD5,BPI,LTF,DEFA4,ELANE,MPO,MMP9,CAMP,SIRPA,TLR2,MAPK14,SELP,SLPI,IRGM,SLC7A5,PF4V1,CEBPE,ADM,CCR5,CMPK2,CTSG,PLSCR3,CASP3,MGST2,TRIM41,PLCG2,UPF1,PRPF8,IFNAR1,TAB2,TRAF6,TSPO,NFKBIA,HMGB2,JAK2,HDAC2,NLRP7,VIM,LYN,IRF3,CD6,PTGER4,CARD16,LTA,PYCARD,XIAP,TLR9,MAP2K3,B2M,CX3CR1,NFKB2,IL10,NR1H4,TLR4,CDK19,NR1D1,CXCL2,TLR1,FOSL2,FOXP3,CEBPB,CXCL1,HMGB1,IL1B,MALT1,LY96,MTDH,IL23R,GSTP1,MAP…
GO:BP	response to wounding	GO:0009611	FALSE	0.0018715265911625723	2.7278039979307342	568	6042	216	21026	IGF1R,GP6,ADORA3,KREMEN1,SERPINB2,MYL9,PROS1,NRG1,KIAA0319,EPHA4,THBS1,MAPK14,SELP,PEAR1,ITGB3,GP1BA,F13A1,AK3,HPSE,F5,SERPING1,AQP1,F2RL1,ITGB5,GP1BB,CTSG,TREML1,TOR1A,DGKA,MYL12A,PLEC,C6ORF89,PRCP,CASP3,VAV3,STXBP3,PDGFB,GLA,TGFBR1,EPPK1,CHMP2A,ATP7A,PLCG2,PDCD10,F7,GRN,VEGFA,BLOC1S3,CHMP3,SULF2,NPR2,ARFGEF1,CLIC1,ALOX5,TSPO,HPS6,GNA13,ZFP36L1,SARM1,TMX1,CHMP1B,JAK2,PIK3CA,MAP2K4,LYN,ADIPOR2,TY…
GO:BP	positive regulation of cell migration	GO:0030335	FALSE	0.0018877254982849593	2.724061157944427	559	6042	213	21026	CEACAM6,IGF1R,VEGFC,FGF9,TGFBR3,XCL1,ITGA2B,EGF,MMP9,SHTN1,EPHA4,CYP1B1,IRS2,THBS1,SELP,ITGB3,C3AR1,SEMA4A,IL1R1,SPHK1,AQP1,F2RL1,DOCK4,PLA2G7,TNFAIP6,RRAS2,CDC42,RTN4,GNAI2,APC,MAP3K3,IGSF8,PDGFB,PTPRC,TGFBR1,PREX1,PLCG1,ZNF580,ATP7A,PLCG2,SSH1,PDCD10,F7,GRN,GLIPR2,VEGFA,MAZ,TNFRSF14,FGR,ADAM8,PDCD6,ETS1,JAK2,CCR6,LYN,RET,DAPK3,PIK3CG,MOSPD2,FADD,STX4,SPAG9,BAG4,HMOX1,PYCARD,MAP2K3,CX3CR1,MIEN1,…
GO:BP	positive regulation of protein localization	GO:1903829	FALSE	0.0019194219311700629	2.7168295472879405	499	6042	193	21026	PFKFB2,PYHIN1,CCT2,FZD5,VEGFC,ASPH,CDK5R1,ABAT,EGF,TLR2,IRS2,MAPK14,HSP90AB1,CENPJ,F2RL1,TNFAIP6,GSK3A,CDC42,RTN4,HDAC3,KIF5B,APC,TMEM30A,UBE2D3,SERP1,SH3GLB1,EDEM1,ITGB2,TSG101,PTPN23,SSH1,PDCD10,CLIP3,VEGFA,HYAL2,ADAM8,NUMA1,JAK2,TRIM28,PIK3CA,HSPA1L,APBB1,TYROBP,MFF,OAZ1,STX4,TTN,HCLS1,EPB41,MYO18A,PLA2G6,ITGAM,SAR1A,XPO4,NR1H4,TLR4,UBL5,ORAI1,STAC3,LRIG2,RPH3AL,MCRS1,ATP13A2,TRIM8,CNPY4,NADK,…
GO:BP	nucleoside phosphate biosynthetic process	GO:1901293	FALSE	0.002034669956317162	2.691506027605783	314	6042	130	21026	NME7,NDUFS4,AK3,PDK4,CMPK2,NDUFB1,GMPR2,NDUFA1,NDUFB4,NDUFA2,NDUFB3,CAD,FPGT,NDUFB6,NANS,AK8,IMPDH1,NPR2,ND5,TBPL1,ATP6V0C,ATP6,ATP5J,NMNAT1,SDHB,UXS1,SDHD,DNAJC30,MPI,NADK,ND4,RRM2,NDUFB5,ATP6V1A,NDUFA8,AK4,TMSB4X,TAZ,NDUFS6,TPK1,NDUFC1,SDHC,NDUFS2,PANK2,DCAKD,HPRT1,PINK1,NDUFB11,PDK1,VCP,ACSL6,PRKAG2,FLAD1,ELOVL4,PAICS,NDUFC2,PDK3,IMPDH2,NAMPT,NPPA,HAAO,NDUFB10,TK2,ND2,PPAT,NDUFV2,NDUFB7,KYNU,K…
GO:BP	cellular response to chemical stress	GO:0062197	FALSE	0.0020842024033465066	2.6810601076430896	317	6042	131	21026	MGST1,TRPM2,PLEKHA1,MPO,MMP9,FUT8,SIRPA,CYP1B1,SPHK1,AQP1,ABCD1,G6PD,PTPRK,SRXN1,TP53,PLEC,CHUK,PXN,CASP3,PNPLA8,KLF2,GSR,ZNF580,ATP7A,PDCD10,MAP3K5,ALOX5,TSPO,TXN,ZFP36L1,FBP1,PIK3CA,HDAC2,MAP2K4,FOXO3,LRRK2,STAU2,STX4,RIPK1,ROMO1,PYCARD,HSPA1A,ARL6IP5,AGAP3,CAB39,SLC4A11,CAPN3,OGG1,NINJ1,OXSR1,ATP13A2,SLC25A24,SLC8A1,CAMKK2,ATG5,GLRX2,HDAC6,MSRA,MAPK1,FOXO1,RELB,GPX1,ANKZF1,CD36,BTK,SLC25A23,FA…
GO:BP	regulation of locomotion	GO:0040012	FALSE	0.002143638306826708	2.668848490714631	1067	6042	377	21026	GPR18,CEACAM6,IGF1R,EVL,GADD45A,VEGFC,ALOX15B,ELANE,FGF9,TGFBR3,ADORA3,XCL1,CLIC4,ITGA2B,EGF,MMP9,SHTN1,EPHA4,CYP1B1,IRS2,THBS1,SELP,ITGB3,AZU1,GP1BA,C3AR1,SEMA4A,IL1R1,SUCNR1,SPHK1,KIF21A,MPP1,AQP1,F2RL1,DOCK4,DPP4,NTNG2,SH3BP1,SCAI,PTPRK,PLA2G7,TNFAIP6,RRAS2,MCTP1,MIIP,CDC42,MINK1,RTN4,GNAI2,APC,MAP3K3,ROCK1,PRCP,YTHDF3,IGSF8,PDGFB,SAP30,GLA,SAP130,PTPRC,TGFBR1,MECP2,PREX1,PLEKHG3,PGAM4,SAP30L,…
GO:BP	regulation of lymphocyte differentiation	GO:0045619	FALSE	0.0023246252302854702	2.633647052897982	221	6042	97	21026	IKZF3,IL7R,PGLYRP1,RHOH,FCRL3,CD83,CR1,INHBA,TBX21,CD27,NFKBID,ARID1A,TCF7,INPP5D,PTPRC,ZMIZ1,NFAM1,ZFP36L1,ADAM8,STAT5B,CD46,FOXO3,IRF4,CAMK4,FOXJ1,TLR9,KAT2A,IL10,LILRB4,BRD4,CD28,ASCL2,FOXP3,HMGB1,SMARCD3,SYK,MALT1,IL23R,PRKCZ,SOS2,CLPTM1,RARA,BTK,ANXA1,CARD11,SLC46A2,SLC4A2,ACTB,SMARCD1,AP3B1,ZFP36L2,PPP2R3C,LILRB2,IL1RL2,TGFBR2,PRDX2,SH3RF1,ERBB2,IL18,ABL1,BCL6,BATF,CCR2,SOX4,CD86,WNT10B,INH…
GO:BP	protein localization to nucleus	GO:0034504	TRUE	0.0025494085505481114	2.5935605619293542	318	6042	131	21026	PYHIN1,CCT2,XPO1,FGF9,RPF2,MAPK14,KPNA3,TOR1A,MARK3,SEC13,TP53,HDAC3,KPNB1,TOR1AIP2,MFHAS1,TOR1AIP1,LZTS2,OSBPL8,TXN,NFKBIA,SP100,HYAL2,MED1,JAK2,TRIM28,SUMO1,LRRK2,HCLS1,PTTG1IP,STK3,LILRB4,STK4,KPNA4,TRAF3IP2,PPP1R10,NUP153,SKP1,NUAK2,MCRS1,ATP13A2,TRIM8,NUP62CL,SYK,E2F3,PPP3R1,MAGED1,HEATR3,PLK1,YWHAZ,NUP214,SMAD3,CD36,NUP50,GSK3B,NFATC3,CDKN1A,KPNA5,ING1,LIMK2,KPNA2,NUTF2,LARP7,CDH1,CBLB,FAM5…
GO:BP	mononuclear cell migration	GO:0071674	FALSE	0.0025755187979325284	2.5891352759877995	227	6042	99	21026	S100A12,TRPM2,XCL1,HSD3B7,SIRPA,THBS1,ITGB3,AZU1,TBX21,C3AR1,PLA2G7,CCR5,CTSG,CDC42,PLEC,RTN4,PDGFB,ALOX5,TNFRSF14,GPR15,ADAM8,CCR6,LYN,RET,PIK3CG,MOSPD2,FADD,GPR183,PYCARD,MMP28,STK10,CX3CR1,SPNS2,MED23,CD99L2,OXSR1,ASCL2,HMGB1,ARTN,MAPK1,APP,RPL13A,AKIRIN1,CNN2,ANXA1,F11R,BCR,AIRE,CXCR2,LGALS3,C5AR1,DOCK8,CXCR4,ABL1,CCL23,LRCH1,CCR2,IL6R,TNFSF14,PF4,P2RY12,MCOLN2,CX3CL1,AKT1,EXT1,ASB2,CCL2,CXCR…
GO:BP	adaptive immune response based on somatic recombination of immune receptors built from immunoglobulin superfamily domains	GO:0002460	TRUE	0.002629828800609982	2.58007252275375	394	6042	157	21026	IL7R,RORA,FZD5,FCER1A,ARG1,C1RL,CD1C,CD8A,TNFSF13,XCL1,LY9,BTN3A2,CLU,CR1,TBX21,SEMA4A,IL1R1,SERPING1,STAT4,TNFSF12,CD27,NFKBID,INPP5D,IGLL5,PTPRC,IGLL1,TRAF6,EXOSC3,SUPT6H,JAK2,TLR8,C4BPA,CCR6,CD46,IRF4,FADD,LTA,FOXJ1,EBI3,FCGR3A,B2M,NFKB2,IL10,LILRB4,BRD4,TLR4,RAB27A,CD28,ASCL2,TRAF3IP2,FOXP3,HMGB1,EXOSC6,SLA2,IL1B,MALT1,BACH2,PMS2,IL23R,RELB,MASP2,PRKCZ,FCER2,BTK,HPRT1,PRKAA1,ANXA1,FCGR2A,GNL1…
GO:BP	monoatomic cation transport	GO:0006812	TRUE	0.002644677858120747	2.57762722077848	1069	6042	377	21026	CACNB2,KCNE1,SLC28A3,LCN2,KCNA3,TCN1,LTF,ASPH,NDUFS4,TRPM2,XCL1,CYBRD1,EGF,MMP9,ANO10,FCRL3,SLC23A1,ITGB3,GP1BA,NDUFA4,SLC24A3,ATP7B,AQP1,G6PD,MS4A1,SLC5A9,GP1BB,CCR5,CD63,RYR1,NIPA2,NDUFB1,CALM2,ATP6V1D,SLC34A1,DIAPH1,NDUFA1,NDUFB4,ARHGAP1,HOMER3,SURF1,NDUFA2,GNAI2,KIF5B,NDUFB3,TMBIM6,GSTM2,COX7B,UQCR10,PDGFB,KCNQ1,PTPRC,UBQLN1,COX5A,UQCRFS1,ATP6V0E1,NDUFB6,PLCG1,ATP7A,PLCG2,ZMPSTE24,ATP6AP1,SLC…
GO:BP	regulation of cell motility	GO:2000145	FALSE	0.002700984065223472	2.5684779779769067	1022	6042	362	21026	GPR18,CEACAM6,IGF1R,EVL,GADD45A,VEGFC,ALOX15B,ELANE,FGF9,TGFBR3,ADORA3,XCL1,CLIC4,ITGA2B,EGF,MMP9,SHTN1,EPHA4,CYP1B1,IRS2,THBS1,SELP,ITGB3,GP1BA,C3AR1,SEMA4A,IL1R1,SPHK1,MPP1,AQP1,F2RL1,DOCK4,DPP4,NTNG2,SH3BP1,SCAI,PTPRK,PLA2G7,TNFAIP6,RRAS2,MCTP1,MIIP,CDC42,MINK1,RTN4,GNAI2,APC,MAP3K3,ROCK1,PRCP,YTHDF3,IGSF8,PDGFB,SAP30,SAP130,PTPRC,TGFBR1,MECP2,PREX1,PLEKHG3,PGAM4,SAP30L,EPPK1,CD300A,PTPN23,PLC…
GO:BP	regulation of microtubule cytoskeleton organization	GO:0070507	FALSE	0.0027628968645825184	2.5586353264402346	164	6042	76	21026	NME7,CDK5R1,CENPJ,KIF21A,GSK3A,PAFAH1B1,MAPRE1,APC,ROCK1,RAE1,MECP2,CHMP2A,CLIP3,CHMP3,STMN3,MID1IP1,CLIP1,CHMP1B,NUMA1,CDKN1B,DYRK1A,BICD2,HSPA1A,VPS4B,SPAST,CHMP7,EML3,PAK1,CAMSAP1,CEP70,PLK1,HDAC6,FES,HAUS3,CHMP1A,PDE4DIP,GSK3B,RNF4,PRKAA1,MAP9,GPSM2,ANKRD53,HAUS8,CHMP2B,BICD1,TRIM54,ABL1,ARL2,CKAP5,CHMP5,KIF18A,TPR,PSRC1,ARHGEF7,DCTN1,TRAF3IP1,CHMP4A,MET,MAP6,NUP62,CDH5,HNRNPU,GIT1,TBCD,HAUS7…
GO:BP	regulation of lymphocyte mediated immunity	GO:0002706	FALSE	0.0027727687832423877	2.557086344035052	194	6042	87	21026	KLRB1,SH2D1A,IL7R,FZD5,ARG1,CD1C,TNFSF13,XCL1,CLEC12B,CR1,TBX21,IL1R1,KLRC4,LAMP1,TNFSF12,PTPRC,TRAF6,EXOSC3,SUPT6H,STAT5B,C4BPA,CD46,FADD,LTA,FOXJ1,B2M,IL10,LILRB4,CD28,FOXP3,HMGB1,EXOSC6,IL1B,MALT1,VAV1,PMS2,IL23R,PRKCZ,FCER2,BTK,PRKAA1,MR1,STX7,SECTM1,MAP3K7,CD7,AP1G1,IL18,KLHL22,SH2D1B,CLNK,BCL6,HLA-A,YWHAG,CCR2,SERPINB9,FCGR1A,CD226,ATAD5,KLRC2,SLC15A4,CD1B,C17ORF99,CLCF1,CR2,FUT7,GATA3,TRAF…
GO:BP	regulation of TORC1 signaling	GO:1903432	FALSE	0.002807860467243623	2.551624477671787	96	6042	50	21026	RRAGD,PRKACB,WAC,LAMTOR2,SEC13,CUL3,SZT2,RHEB,FNIP1,WDR59,UBE2W,RRAGA,USP4,C9ORF72,STAMBPL1,LAMTOR3,SAR1A,NPC1,SYK,YWHAZ,PRKAA1,PIM1,RRAGC,TBK1,SIK3,SESN1,ATM,SRMS,SAR1B,KLHL22,ITFG2,SESN2,TSC1,PELI1,YWHAG,DGKQ,AKT1,DEPDC5,CTNS,USP32,RRAGB,RBX1,GPR137,AKT1S1,LAMTOR4,OTUB1,PIH1D1,WDR24,STK11,PRMT1
GO:BP	protein folding	GO:0006457	FALSE	0.0028231586468395395	2.5492647160751662	219	6042	96	21026	FKBP5,CCT2,HSPH1,FKBP9,HSP90AB1,CLU,TOR1A,HYOU1,RP2,TTC1,DNAJC5,DNAJA2,CCDC47,CLPX,GRN,SDF2,UGGT1,TXNDC5,HSPA1L,BAG4,HSPA1A,DNAJC3,B2M,NFYC,QSOX2,HSPA6,POFUT2,NUDCD3,DNAJA3,DFFA,NKTR,QSOX1,TBCC,TBCA,GRPEL2,CDC123,ALG12,PPIAL4G,PPIL2,CRYAA,TRAP1,HSPB1,TMEM85,NPPA,ARL2,AHSP,FKBP8,TSC1,PPID,PPIL1,CCT6B,NUDC,PDIA6,DNAJB7,HSPBP1,CCT7,AHSA1,TTC4,HSPA14,RUVBL2,SNRNP70,CALR,PDIA3,BAG5,GRPEL1,CCT3,TBCD,WI…
GO:BP	multivesicular body organization	GO:0036257	FALSE	0.0029121921744186554	2.535779969490948	33	6042	23	21026	TSG101,HGS,CHMP2A,CHMP3,CHMP1B,VPS4B,CHMP7,RAB27A,CHMP1A,VPS37B,CHMP2B,SNF8,CHMP5,CHMP4A,VTA1,VPS37A,CHMP4B,IST1,RAB11A,MVB12A,VPS25,VPS28,CHMP6
GO:BP	response to lipopolysaccharide	GO:0032496	FALSE	0.0029324666989161557	2.5327669110313837	339	6042	138	21026	MMP8,IRAK3,BPI,LTF,DEFA4,ELANE,MPO,MMP9,CAMP,SIRPA,TLR2,MAPK14,SELP,SLPI,IRGM,SLC7A5,PF4V1,CEBPE,ADM,CCR5,CMPK2,CTSG,PLSCR3,CASP3,MGST2,TRIM41,PLCG2,UPF1,PRPF8,IFNAR1,TAB2,TRAF6,TSPO,NFKBIA,HMGB2,JAK2,HDAC2,NLRP7,VIM,LYN,IRF3,CD6,PTGER4,CARD16,LTA,PYCARD,XIAP,TLR9,MAP2K3,CX3CR1,NFKB2,IL10,NR1H4,TLR4,CDK19,NR1D1,CXCL2,FOSL2,FOXP3,CEBPB,CXCL1,HMGB1,IL1B,MALT1,LY96,MTDH,IL23R,GSTP1,MAPK1,MAPKAPK3,CD…
GO:BP	intracellular receptor signaling pathway	GO:0030522	FALSE	0.002945317044476861	2.5308679493468986	377	6042	151	21026	RORA,ALOX15B,DDX17,FCRL3,IRGM,NR1D2,F2RL1,RNF135,AKR1C3,CTBP2,ZDHHC3,PPP6C,TADA3,UFD1L,SAFB2,RTN4,PRCP,TRIM24,UBQLN1,RARG,ZMIZ1,KLF2,NCOA4,PLCG2,TRAF6,NFKBIA,SP100,MED1,ESRRA,NR3C1,RIOK3,JAK2,TLR8,TAX1BP1,VPS18,NR6A1,RXRA,IRF3,TRIP4,LBH,PYCARD,HSPA1A,XIAP,TLR9,BANF1,NR1H4,TLR4,PAK1,TAF7,TMF1,TRERF1,NR1D1,ESR2,DYX1C1,SNW1,SMPDL3A,TRIM25,HMGB1,NR3C2,VDR,BMP2,LSM14A,GLTPD1,NLRX1,ZDHHC12,PUM2,LAMP2,H…
GO:BP	regulation of proteasomal protein catabolic process	GO:0061136	FALSE	0.0029578212873058282	2.529028069785242	197	6042	88	21026	XPO1,TTC36,CEBPA,TRIB2,HSP90AB1,CLU,PSMF1,GSK3A,WAC,HERPUD1,UBE2K,PSMC1,UBQLN1,ZER1,USP38,TMX1,SUMO1,RAD23B,LRRK2,Q16594,HSPA1A,USP13,TMF1,DYX1C1,GABARAPL2,CBFA2T3,PLK1,USP14,PSME1,USP25,GPX1,RFPL1,GSK3B,BTRC,FMR1,PINK1,EIF3H,VCP,CDK2,SH3RF1,UBQLN2,GABARAP,PRICKLE1,FBXW7,RCHY1,CHFR,AKT1,WNT10B,HSPBP1,TF,USP19,CSNK2A2,UBQLN4,PSMC4,BAG5,PSMC3,GBA,USP5,HECTD1,SIRT1,PHF20L1,MTM1,PARK2,WFS1,UFL1,SGTA,…
GO:BP	regulation of protein ubiquitination	GO:0031396	FALSE	0.0029578212873058282	2.529028069785242	197	6042	88	21026	TTC36,HSP90AB1,SPHK1,CEP78,RPS7,SIAH2,GSK3A,HERPUD1,CUL3,HDAC3,UBQLN1,TGFBR1,PHF23,TRAF6,TSPO,PDCD6,LRRK2,SPOPL,USP4,PTTG1IP,HSPA1A,XIAP,CTNNB1,PTEN,NMI,SKP1,DNAJA3,ATG5,MALT1,CEP63,PLK1,HUWE1,TRIM44,GSK3B,BTRC,FBXO33,PINK1,RNF111,CBLB,IVNS1ABP,GABARAP,ABL1,PRICKLE1,FBXW7,RCHY1,MAGEA2B,PELI1,CHFR,UBE2L3,TSPYL5,AKT1,SOX4,GPS2,PRKCE,ADGRB1,HSPBP1,TICAM1,BAG5,RPL23,CRY1,MYCBP2,PARK2,WFS1,U2AF2,UFL1,…
GO:BP	response to metal ion	GO:0010038	FALSE	0.00313343585739903	2.5039791910430824	351	6042	142	21026	ASPH,CEBPA,TRPM2,ABAT,CLIC4,CYBRD1,MMP9,THBS1,TESMIN,ATP7B,SUCNR1,TSHB,AQP1,CARF,G6PD,AKR1C3,FECH,RYR1,GSK3A,CALM2,SLC34A1,CHUK,CASP3,MECP2,TNNC1,AQP3,ATP7A,PLCG2,MTF1,UCP2,TSPO,SLC26A5,IQGAP1,FBP1,PDCD6,SUMO1,SERPINF1,XRCC4,CDKN1B,LRRK2,TTN,HMOX1,D2HGDH,TLR9,ITPR3,B2M,CAPN3,OGG1,SETD2,JUND,NPC1,ATP13A2,ATF1,SLC25A24,ATG5,ALOX5AP,SLC30A1,CREB1,MAPK1,MEF2A,DNMT3A,SLC25A23,NEK7,PRKAA1,ANK3,CPNE5,CO…
GO:BP	synaptic vesicle maturation	GO:0016188	FALSE	0.003142361393748698	2.5027438694917	27	6042	20	21026	SYP,ATP6V1D,PICALM,ZDHHC20,ATP6AP1,ATP6V1C1,ATP6AP2,ATP6V0C,ATP6V1E1,ATP6V1A,ATP6V0A1,RAB3A,ATP6V1G1,SNAPIN,STXBP1,ATP6V1F,ATP6V1B1,ATP6V1G2,ATP6V0D1,ATP6V1H
GO:BP	establishment of vesicle localization	GO:0051650	FALSE	0.0031477596168910903	2.501998440558162	200	6042	89	21026	WIPI1,TOR1A,PPP6C,PAFAH1B1,CUL3,KIF5B,KIF1C,EXOC6,TSG101,MECP2,PICALM,HGS,CHMP2A,MYO5A,BLOC1S3,FAM91A1,RAB7A,NDEL1,PDCD6,RAB1A,LRRK2,COPS5,VPS4B,CTNNB1,EXOC3,SAR1A,AP3M2,RAB27A,TRAPPC3,FBXW11,EXOC8,ATP13A2,TRIM46,RAB11B,AP3S1,SYBU,TMED2,KLHL12,SDCBP,PRKCZ,TRIP11,MYO1C,PINK1,RAB3A,TRAPPC8,STARD3,EXOC2,SNAPIN,BBS5,KIF5C,LIMK2,AP3B1,TCIRG1,NDE1,HAP1,AP1G1,SNF8,SAR1B,KIF13A,MAP4K2,DCTN1,TRAPPC1,UNC13…
GO:BP	mitochondrial respiratory chain complex assembly	GO:0033108	FALSE	0.003220429854524657	2.492086155947487	122	6042	60	21026	NDUFS4,NDUFAF4,NDUFB1,NDUFA1,NDUFB4,SURF1,NDUFA2,COX7A2,NDUFB3,UQCRFS1,NDUFB6,NDUFAF1,ND5,ND4,NDUFB5,NDUFA8,TAZ,NDUFC1,HIGD1A,COX7A2L,NDUFS2,NDUFB11,COX17,NDUFC2,NDUFB10,ND2,ATPAF1,NDUFB7,FMC1,AIFM1,CSRP2BP,NDUFA9,NDUFS7,COX16,NDUFA12,SAMM50,NDUFA11,NDUFS5,NDUFB2,COA3,NDUFAF8,NDUFS3,ECSIT,NDUFS8,ATP5F1D,COX14,UQCC3,HIGD2A,SDHAF1,ATPAF2,NDUFAF3,DMAC2,NDUFB9,NDUFAB1,UQCC4,PET100,MT-ND1,COA8,UQCC5,D…
GO:BP	positive regulation of cell motility	GO:2000147	FALSE	0.0032685655373795764	2.4856428026555486	587	6042	221	21026	CEACAM6,IGF1R,VEGFC,FGF9,TGFBR3,XCL1,ITGA2B,EGF,MMP9,SHTN1,EPHA4,CYP1B1,IRS2,THBS1,SELP,ITGB3,C3AR1,SEMA4A,IL1R1,SPHK1,AQP1,F2RL1,DOCK4,PLA2G7,TNFAIP6,RRAS2,CDC42,RTN4,GNAI2,APC,MAP3K3,IGSF8,PDGFB,PTPRC,TGFBR1,PREX1,PGAM4,PLCG1,ZNF580,ATP7A,PLCG2,SSH1,PDCD10,F7,GRN,GLIPR2,VEGFA,MAZ,TNFRSF14,FGR,SLC26A5,ADAM8,PDCD6,ETS1,JAK2,CCR6,LYN,RET,DAPK3,PIK3CG,MOSPD2,FADD,STX4,SPAG9,BAG4,HMOX1,PYCARD,MAP2K3…
GO:BP	activation of innate immune response	GO:0002218	FALSE	0.0034000148834406017	2.4685191818453984	305	6042	126	21026	IRAK3,PYHIN1,LTF,CLEC4E,TLR2,FCRL3,IRGM,F2RL1,RNF135,NAIP,KLRC4,ZDHHC3,PPP6C,UFD1L,CHUK,RTN4,MFHAS1,UBQLN1,CD300A,PLCG2,TRAF6,NFKBIA,SARM1,RIOK3,TLR8,TAX1BP1,LYN,TYROBP,IRF3,IRF4,PYCARD,HSPA1A,XIAP,TLR9,PAK2,BANF1,NR1H4,TLR4,NINJ1,PAK1,NR1D1,NMI,TLR1,CYBA,SMPDL3A,TRIM25,HMGB1,SYK,LSM14A,GLTPD1,NLRX1,ZDHHC12,PUM2,LY96,LAMP2,MAPKAPK3,AIM2,CD36,IKBKB,MNDA,RBM14,NR1H3,BTK,NEK7,RNF34,SLC46A2,BRCC3,TBK…
GO:BP	glycogen metabolic process	GO:0005977	FALSE	0.0034317475472823433	2.4644846680421115	84	6042	45	21026	GRB10,WIPI1,IRS2,GBE1,GSK3A,GAA,PPP1R3E,PGM2,UGP2,PPP1R3D,ATG12,STK40,NR1D1,INPP5K,LEPR,EPM2AIP1,RB1CC1,PPP1R3B,WIPI2,GYG1,ATG3,IGF1,GSK3B,SLC37A4,PHKA2,PYGL,PRKAG2,GABARAPL1,IL6ST,PPP1R3C,AKT1,DYRK2,PHKA1,KHK,ENPP1,WDR45,PPP1CA,PHKB,PYGB,PER2,PHKG2,STBD1,POMC,COMT,PPP1R3F
GO:BP	positive regulation of catalytic activity	GO:0043085	FALSE	0.0034372599536854507	2.4637876217231303	554	6042	210	21026	S100A12,LTF,ELANE,ADORA3,NRG1,EPHA4,THBS1,MAPK14,ITGB3,CR1,IRGM,F2RL1,SH3BP1,GSK3A,CALM2,YWHAB,TBC1D2,ROCK1,TAOK3,DOCK9,SNX13,PDGFB,ITGB2,PTPRC,SPDYE2,TERF2,ATP7A,PDCD10,MAP3K5,GRN,TAB2,SERINC1,TRAF6,ABR,MID1IP1,RAP1A,IQGAP1,JTB,NDEL1,JAK2,XRCC4,LYN,FGFR4,CAP1,PIK3CG,LRRK2,TRAF4,STX4,DBI,FOXJ1,SNX18,HSPA1A,MAP2K3,RASSF2,DDX11,CD44,CAB39,RAPGEF2,SEMG1,ITGAM,SYAP1,TANK,TLR4,PAK1,PTEN,RALB,ORAI1,TNF…
GO:BP	cell morphogenesis	GO:0000902	FALSE	0.003446590014685589	2.462610374540825	996	6042	353	21026	IL7R,IGF1R,TNIK,CDK5R1,CLEC1B,CLIC4,FGD4,SHTN1,RHOH,KIAA0319,S100B,EPHA4,CYFIP1,B4GALT5,MAPK14,C12ORF57,GP1BA,HECW2,CLU,SEMA4A,KIF21A,VSIG1,NTNG2,CFDP1,CDC42,PAFAH1B1,DIAPH1,PLEC,PSMB10,MINK1,CUL3,RTN4,SZT2,KIF5B,ROCK1,TAOK3,CASP3,MYL12B,USP33,ITGB2,GLA,MECP2,RILPL2,PICALM,KLF2,RHOQ,ATP7A,SSH1,ZMPSTE24,MKLN1,RB1,VEGFA,RAPH1,NPR2,PITPNA,LYPLA2,VASP,GNA13,FGR,MED1,SLC26A5,PDZD8,IQGAP1,SARM1,ADAM8,A…
GO:BP	positive regulation of leukocyte mediated immunity	GO:0002705	FALSE	0.0034695078012887542	2.4597321316488836	154	6042	72	21026	SH2D1A,FZD5,ARG1,CD1C,TNFSF13,XCL1,TBX21,IL1R1,F2RL1,CD177,KLRC4,LAMP1,TNFSF12,ITGB2,PTPRC,PLCG2,TRAF6,EXOSC3,STAT5B,TYROBP,FADD,STX4,LTA,B2M,ITGAM,CD28,FOXP3,EXOSC6,IL1B,MALT1,VAV1,PMS2,IL23R,PRKCZ,FCER2,BTK,PRKAA1,MR1,STX7,SECTM1,MAP3K7,CD7,AP1G1,IL18,KLHL22,SH2D1B,CLNK,HLA-A,YWHAG,SCIMP,FCGR1A,CD226,ATAD5,KLRC2,CD1B,C17ORF99,CLCF1,GATA3,TRAF2,TICAM1,TGFB1,RASGRP4,FBXO38,CLEC7A,CD81,DDX21,CD40,…
GO:BP	positive regulation of apoptotic signaling pathway	GO:2001235	FALSE	0.0034771295870578917	2.458779123554463	138	6042	66	21026	THBS1,INHBA,RPS7,MYC,NACC2,TNFSF12,CRADD,TP53,PTPRC,TGFBR1,STYXL1,HYAL2,JAK2,TRAF7,RET,FADD,BID,RIPK1,PYCARD,STK3,PPP2R1A,PAK2,PMAIP1,TLR4,STK4,SERINC3,MAGED1,FAS,MAL,ING5,ITM2C,BBC3,TNFRSF12A,CTNNA1,FBXW7,SKIL,S100A9,PEA15,RNF183,WWOX,BMPR1B,DEDD2,TAF6,TRAF2,CASP2,PDIA3,CTSK,FAF1,PPP1CA,SIRT1,SIAH1,RPL26,PIAS4,EEF1E1,TLR6,S100A8,FIS1,BAD,BAX,RPS3,CTSH,BCAP31,PARK7,RACK1,SFRP1,SOD1
GO:BP	glucose metabolic process	GO:0006006	FALSE	0.003608973394924376	2.44261631951437	184	6042	83	21026	HK2,PFKFB2,RORA,IRS2,MAPK14,PDK4,G6PD,TKTL1,HK3,GSK3A,TP53,GAA,SERP1,CRTC2,PPP1R3E,PGM2,KCNQ1,BRAT1,ZMPSTE24,SIK1,FBP1,NR3C1,PIK3CA,PFKFB1,KAT2A,PMAIP1,ENO3,LEPR,EPM2AIP1,PGM1,PGK1,PPP1R3B,NLN,FOXO1,ENO2,IGFBP3,IGF1,SLC37A4,PRKAA1,PDK1,SORD,IGFBP4,PDK3,PFKP,PGAM1,SESN2,CLK2,DGKQ,ALDOC,PDX1,AKT1,DYRK2,PHKA1,GHRL,MTCL2,GNB3,DCXR,TPI1,ENO1,PPP1CA,CRY1,FOXK1,SIRT1,PARK2,WDR5,SLC25A13,TCF7L2,CPT1A,KBT…
GO:BP	regulation of type I interferon production	GO:0032479	FALSE	0.0036783380332442153	2.4343483623119595	125	6042	61	21026	SIRPA,TLR2,IRGM,RNF135,YY1,UFD1L,CHUK,CUL3,PLCG2,TRAF6,PPM1B,HMGB2,RIOK3,TLR8,TYROBP,IRF3,ATG12,RAB2B,PYCARD,XIAP,TLR9,BANF1,IL10,TANK,TLR4,SETD2,NMI,QKI,SYK,NLRX1,ATG5,PTPN11,DHX9,RELB,POLR3F,TBK1,KPNA2,KLHL22,POLR3D,CACTIN,IRF8,TRAF3IP1,POLR3A,ZCCHC3,USP22,GPATCH3,TICAM1,RNF26,TLR7,TLR3,POLA1,REL,DHX33,G3BP1,POLR3G,TRAIP,MORC3,RBX1,PQBP1,STING1,GAPDH
GO:BP	type I interferon production	GO:0032606	FALSE	0.0036783380332442153	2.4343483623119595	125	6042	61	21026	SIRPA,TLR2,IRGM,RNF135,YY1,UFD1L,CHUK,CUL3,PLCG2,TRAF6,PPM1B,HMGB2,RIOK3,TLR8,TYROBP,IRF3,ATG12,RAB2B,PYCARD,XIAP,TLR9,BANF1,IL10,TANK,TLR4,SETD2,NMI,QKI,SYK,NLRX1,ATG5,PTPN11,DHX9,RELB,POLR3F,TBK1,KPNA2,KLHL22,POLR3D,CACTIN,IRF8,TRAF3IP1,POLR3A,ZCCHC3,USP22,GPATCH3,TICAM1,RNF26,TLR7,TLR3,POLA1,REL,DHX33,G3BP1,POLR3G,TRAIP,MORC3,RBX1,PQBP1,STING1,GAPDH
GO:BP	regulation of cytokine-mediated signaling pathway	GO:0001959	FALSE	0.0036909731346032137	2.4328591158815684	165	6042	76	21026	MMP8,IRAK3,ARG1,IL1R2,IL1R1,IRGM,SPHK1,F2RL1,NAIP,PAFAH1B1,AGPAT2,UBE2K,YTHDF3,SHARPIN,PTPRC,TRIM41,MED1,IL1RN,EIF4E2,IRF3,PYDC1,FADD,CARD16,HIPK1,RIPK1,CASP4,PYCARD,HSPA1A,XIAP,RFFL,TANK,NR1H4,GIGYF2,DNAJA3,SYK,LSM14A,PTPN11,SPATA2,GSTP1,TRIM44,USP25,IKBKB,NR1H3,TBK1,CASP1,DICER1,SPPL2A,CXCR4,IL6ST,OTUD4,NOL3,CACTIN,GPS2,MIB2,NLRC5,EXT1,CD300LF,C1QTNF4,TRAF2,PTPN1,CNOT7,NLRP6,APOA1,MAPKAPK2,PARK…
GO:BP	regulation of immunoglobulin production	GO:0002637	FALSE	0.004065268222923967	2.390910794745723	77	6042	42	21026	TNFSF13,XCL1,FCRL3,CR1,TBX21,TNFSF12,TMBIM6,PTPRC,TRAF6,EXOSC3,SUPT6H,STX4,MZB1,TLR9,IL10,CD28,FOXP3,EXOSC6,CD22,PMS2,BTK,CD40LG,TNFRSF4,BCL6,CD86,ATAD5,SLC15A4,C17ORF99,CLCF1,EPHB2,TRAF2,PKN1,PHB,IL27RA,TGFB1,CD40,MAD2L2,GPI,KMT5C,PHB2,SHLD1,IL4
GO:BP	protein autophosphorylation	GO:0046777	FALSE	0.0041090825232066135	2.3862551366613762	179	6042	81	21026	IGF1R,TNIK,MAP3K21,NRG1,EPHA4,BMX,CALM2,MARK3,MINK1,MAP3K3,TAOK3,PDGFB,PTPRC,CAD,VEGFA,SIK1,HTATIP2,MAP4K1,MVP,FGR,LTK,JAK2,LYN,FGFR4,DAPK3,LRRK2,DYRK1A,MAP3K9,RIPK1,RASSF2,PAK2,STK10,PAK1,STK4,OXSR1,ULK3,ATP13A2,EPHA1,CAMKK2,MAP3K11,FES,NEK6,DDR1,TAOK2,GSK3B,PIM1,PINK1,LMTK2,CDKL5,ATM,SRMS,ABL1,HCK,STK17B,FGFR1,NTRK1,CLK2,CAMK2B,AKT1,SIK2,EPHB3,MAP3K10,FGFR2,NTRK2,EEF2K,ENPP1,EIF2AK3,PRKX,STK24,…
GO:BP	RNA transport	GO:0050658	FALSE	0.004156691830193877	2.3812521721277435	160	6042	74	21026	XPO1,THOC1,SEC13,AAAS,KPNB1,RAE1,YTHDC1,TOMM20L,RBM8A,UPF1,MVP,ZFP36L1,ENY2,SUPT6H,THOC6,NUP210,NUP160,THOC7,SMG6,BICD2,TNKS,FXR1,SETD2,SIDT1,ATXN2,EIF4A3,NUP153,QKI,NUP62CL,NUP214,AGFG1,ZC3H11A,DHX9,DDX39B,NUP50,FMR1,PEG10,XPOT,TST,KIF5C,NUTF2,GLE1,SARNP,TGFBR2,RANBP17,SHFM1,CKAP5,HSF1,HHEX,TPR,SIDT2,NUP43,SMG5,NXT1,UPF3A,DDX19A,IGF2BP1,NUP155,XPO5,NUP62,PABPN1,NUP93,DDX39A,MCM3AP,IWS1,KHDRBS1,N…
GO:BP	nucleic acid transport	GO:0050657	FALSE	0.004156691830193877	2.3812521721277435	160	6042	74	21026	XPO1,THOC1,SEC13,AAAS,KPNB1,RAE1,YTHDC1,TOMM20L,RBM8A,UPF1,MVP,ZFP36L1,ENY2,SUPT6H,THOC6,NUP210,NUP160,THOC7,SMG6,BICD2,TNKS,FXR1,SETD2,SIDT1,ATXN2,EIF4A3,NUP153,QKI,NUP62CL,NUP214,AGFG1,ZC3H11A,DHX9,DDX39B,NUP50,FMR1,PEG10,XPOT,TST,KIF5C,NUTF2,GLE1,SARNP,TGFBR2,RANBP17,SHFM1,CKAP5,HSF1,HHEX,TPR,SIDT2,NUP43,SMG5,NXT1,UPF3A,DDX19A,IGF2BP1,NUP155,XPO5,NUP62,PABPN1,NUP93,DDX39A,MCM3AP,IWS1,KHDRBS1,N…
GO:BP	regulation of body fluid levels	GO:0050878	FALSE	0.00417275528477802	2.379577084156464	376	6042	150	21026	HK2,GP6,SERPINB2,PRKACB,MYL9,PROS1,THBS1,MAPK14,SELP,PEAR1,ITGB3,GP1BA,F13A1,AK3,HPSE,F5,ATP7B,SERPING1,AQP1,F2RL1,ADM,GP1BB,CTSG,TREML1,DGKA,MYL12A,FLI1,GNAI2,VAV3,STXBP3,PDGFB,GLA,CAD,AQP3,ATP7A,PLCG2,F7,VEGFA,BLOC1S3,CLIC1,HPS6,GNA13,HYAL2,MED1,TMX1,JAK2,PIK3CA,STAT5B,LYN,C1GALT1C1,PIK3CG,TSPAN18,MLLT6,ITPR3,USF2,ENTPD2,TLR4,RAB27A,TRAF3IP2,UBASH3B,PLEK,FOSL2,CYBA,F12,COX2,INPP5K,NFE2,VDR,SYK,…
GO:BP	positive regulation of extrinsic apoptotic signaling pathway	GO:2001238	FALSE	0.00420707978923635	2.3760192513068774	51	6042	31	21026	THBS1,INHBA,TNFSF12,PTPRC,HYAL2,RET,FADD,BID,RIPK1,PYCARD,STK3,PPP2R1A,PAK2,PMAIP1,TLR4,STK4,MAL,ITM2C,TNFRSF12A,CTNNA1,SKIL,PEA15,WWOX,BMPR1B,DEDD2,TRAF2,PDIA3,FAF1,PPP1CA,TLR6,SFRP1
GO:BP	enzyme-linked receptor protein signaling pathway	GO:0007167	FALSE	0.0043951230093425666	2.35702896552056	970	6042	344	21026	GRB10,NDST1,IGF1R,VEGFC,CSRP3,TRIM71,TNS2,CDK5R1,FGF9,GP6,SORT1,PLEKHA1,TGFBR3,CD8A,SH2B2,REPS2,EGF,MMP9,CTSD,FUT8,NRG1,KIAA0319,EPHA4,HTRA1,CYFIP1,LTBP1,IRS2,THBS1,MAPK14,ITGB3,HSP90AB1,INHBA,HIP1,GAB2,PDK4,ITGB5,PTPRK,TNFAIP6,CD8B,PDE6H,CD63,GSK3A,CNKSR1,TP53,CD3E,RTN4,LTBP3,GNAI2,PTPN12,EIF4EBP2,APC,PXN,CASP3,UBE2D3,DOK1,SAMD10,TRIM33,PDGFB,SAP30,SAP130,SGPL1,TSG101,TGFBR1,ZFAND5,ZMIZ1,SAP30L,…
GO:BP	response to oxidative stress	GO:0006979	FALSE	0.004481735613627569	2.348553766928433	400	6042	158	21026	MGST1,HP,TRPM2,PLEKHA1,MPO,MMP9,FUT8,SIRPA,CYP1B1,SPHK1,PTGS1,AQP1,ABCD1,G6PD,PTPRK,MCTP1,SRXN1,TOR1A,TP53,CHUK,PRDX6,PPP1R15B,PXN,CASP3,EPAS1,PNPLA8,KLF2,GSR,ZNF580,ATP7A,PDCD10,MAP3K5,MTF1,UCP2,ALOX5,TXN,HYAL2,ND5,JAK2,HDAC2,MAP2K4,FOXO3,LRRK2,STAU2,STX4,RIPK1,ROMO1,HMOX1,NEIL1,GGT7,HSPA1A,ARL6IP5,AGAP3,BANF1,SLC4A11,OGG1,OXSR1,TRIM25,ATP13A2,MSRB2,SLC25A24,SLC8A1,CAMKK2,GLRX2,SLC23A2,HDAC6,MSR…
GO:BP	establishment of RNA localization	GO:0051236	FALSE	0.004523776740403902	2.344498836726953	163	6042	75	21026	XPO1,THOC1,SEC13,AAAS,KPNB1,RAE1,YTHDC1,TOMM20L,RBM8A,UPF1,MVP,ZFP36L1,ENY2,SUPT6H,THOC6,NUP210,NUP160,THOC7,SMG6,BICD2,TNKS,FXR1,SETD2,SIDT1,ATXN2,EIF4A3,NUP153,QKI,NUP62CL,NUP214,AGFG1,ZC3H11A,DHX9,DDX39B,NUP50,FMR1,PEG10,XPOT,TST,KIF5C,NUTF2,GLE1,SARNP,TGFBR2,ATM,RANBP17,SHFM1,CKAP5,HSF1,HHEX,TPR,SIDT2,NUP43,SMG5,NXT1,UPF3A,DDX19A,IGF2BP1,NUP155,XPO5,NUP62,PABPN1,NUP93,DDX39A,MCM3AP,IWS1,KHDRB…
GO:BP	cytokine production involved in immune response	GO:0002367	FALSE	0.004535945096905506	2.3433322107851855	123	6042	60	21026	IRAK3,FZD5,ARG1,XCL1,TBX21,IL1R1,SLC7A5,F2RL1,RTN4,PLCG2,TRAF6,TNFRSF14,UBE2J1,PYCARD,TLR9,B2M,IL10,LILRB4,TLR4,FOXP3,SYK,NLRX1,IL1B,ATG5,MALT1,PRKCZ,CD36,BTK,LACC1,SPON2,SECTM1,MAP3K7,CD7,IL18,CLNK,BCL6,HLA-A,CCR2,SCIMP,CD226,GATA3,TRAF2,TICAM1,TLR7,TLR3,APOA1,TGFB1,SIRT1,MAPKAPK2,CLEC7A,CD81,DDX21,TGFB3,CLC,CUEDC2,CARD9,BST2,SEMA7A,IL4,SPHK2
GO:BP	regulation of cytokine production involved in immune response	GO:0002718	FALSE	0.004535945096905506	2.3433322107851855	123	6042	60	21026	IRAK3,FZD5,ARG1,XCL1,TBX21,IL1R1,SLC7A5,F2RL1,RTN4,PLCG2,TRAF6,TNFRSF14,UBE2J1,PYCARD,TLR9,B2M,IL10,LILRB4,TLR4,FOXP3,SYK,NLRX1,IL1B,ATG5,MALT1,PRKCZ,CD36,BTK,LACC1,SPON2,SECTM1,MAP3K7,CD7,IL18,CLNK,BCL6,HLA-A,CCR2,SCIMP,CD226,GATA3,TRAF2,TICAM1,TLR7,TLR3,APOA1,TGFB1,SIRT1,MAPKAPK2,CLEC7A,CD81,DDX21,TGFB3,CLC,CUEDC2,CARD9,BST2,SEMA7A,IL4,SPHK2
GO:BP	negative regulation of phosphorus metabolic process	GO:0010563	FALSE	0.0049669918440191	2.3039065531314944	304	6042	125	21026	IRAK3,TTC36,GADD45A,TRIB2,SIRPA,IRS2,PPP1R26,INHBA,GSK3A,CTDSP1,CALM2,TP53,PPP1R15B,APC,PDGFB,PTPRC,TSG101,CDKN2D,CD300A,RB1,MIDN,MEN1,TSPO,MVP,HYAL2,IQGAP1,FBP1,CTDSP2,LYN,SNX6,CDKN1B,LRRK2,PFKFB1,C9ORF72,HDAC4,PYCARD,DNAJC3,RASSF2,PAK2,LILRB4,PTEN,TAF7,SLC27A1,ADARB1,PLEK,INPP5K,IER3,DNAJA3,BMP2,EPHA1,CBFA2T3,IL1B,SLC8A1,TFAP4,PLK1,SLC4A1,TMED2,GSTP1,DUSP6,PKIB,PRKCZ,GNAQ,IGFBP3,PPM1F,RGS2,CDKN…
GO:BP	negative regulation of phosphate metabolic process	GO:0045936	FALSE	0.0049669918440191	2.3039065531314944	304	6042	125	21026	IRAK3,TTC36,GADD45A,TRIB2,SIRPA,IRS2,PPP1R26,INHBA,GSK3A,CTDSP1,CALM2,TP53,PPP1R15B,APC,PDGFB,PTPRC,TSG101,CDKN2D,CD300A,RB1,MIDN,MEN1,TSPO,MVP,HYAL2,IQGAP1,FBP1,CTDSP2,LYN,SNX6,CDKN1B,LRRK2,PFKFB1,C9ORF72,HDAC4,PYCARD,DNAJC3,RASSF2,PAK2,LILRB4,PTEN,TAF7,SLC27A1,ADARB1,PLEK,INPP5K,IER3,DNAJA3,BMP2,EPHA1,CBFA2T3,IL1B,SLC8A1,TFAP4,PLK1,SLC4A1,TMED2,GSTP1,DUSP6,PKIB,PRKCZ,GNAQ,IGFBP3,PPM1F,RGS2,CDKN…
GO:BP	regulation of tumor necrosis factor-mediated signaling pathway	GO:0010803	FALSE	0.005107268164962374	2.291811338246707	63	6042	36	21026	MMP8,SPHK1,F2RL1,NAIP,UBE2K,SHARPIN,PYDC1,CARD16,HIPK1,RIPK1,CASP4,PYCARD,HSPA1A,XIAP,RFFL,TANK,NR1H4,SYK,SPATA2,GSTP1,IKBKB,CASP1,DICER1,SPPL2A,NOL3,GPS2,MIB2,EXT1,TRAF2,APOA1,MAPKAPK2,PARK2,TRIM32,PIAS4,PIAS3,TRAIP
GO:BP	lymphocyte homeostasis	GO:0002260	FALSE	0.005183279807164074	2.2853953461619456	80	6042	43	21026	IL7R,GPR174,SH2B2,CASP3,SIT1,STAT5B,LYN,FADD,PPP2R1A,PMAIP1,BBIP1,SPNS2,TRAF3IP2,FOXP3,DNAJA3,TNFRSF13B,TNFRSF17,SOS2,AIM2,FAS,SLC46A2,TCIRG1,DOCK11,PPP2R3C,SLC40A1,PRDX2,ABL1,SKIL,TNFSF14,TSC22D3,AKT1,SPTA1,LMO1,PKN1,CORO1A,NCKAP1L,TGFB1,DOCK10,LGALS2,BAX,SLC39A3,SIVA1,RPS6
GO:BP	lysosome organization	GO:0007040	FALSE	0.005258789198212498	2.2791142377980624	113	6042	56	21026	IRGM,TFEB,LAMP1,ATP6V1D,GAA,CREG1,CHMP2A,GRN,FNIP1,ATP6AP1,TMEM199,CHMP3,RAB7A,CHMP1B,ATP6AP2,ATP6V0C,VPS18,LRRK2,CHMP7,ARL8B,RAB34,LAMP2,ATP6V1A,HOOK3,CHMP1A,ATP6V0A1,HOOK1,SNAPIN,TFE3,AP3B1,RAB20,TCIRG1,CHMP2B,PI4KB,C14ORF133,VPS35,MFSD8,CHMP5,ATP6V1F,CHMP4A,HEXA,NAGPA,HOOK2,VPS33B,TPP1,ATP6V1H,CORO1A,CLN6,GBA,CHMP4B,ZFYVE26,ZKSCAN3,CHMP6,RNASEK,ACP2,NAGLU
GO:BP	lytic vacuole organization	GO:0080171	FALSE	0.005258789198212498	2.2791142377980624	113	6042	56	21026	IRGM,TFEB,LAMP1,ATP6V1D,GAA,CREG1,CHMP2A,GRN,FNIP1,ATP6AP1,TMEM199,CHMP3,RAB7A,CHMP1B,ATP6AP2,ATP6V0C,VPS18,LRRK2,CHMP7,ARL8B,RAB34,LAMP2,ATP6V1A,HOOK3,CHMP1A,ATP6V0A1,HOOK1,SNAPIN,TFE3,AP3B1,RAB20,TCIRG1,CHMP2B,PI4KB,C14ORF133,VPS35,MFSD8,CHMP5,ATP6V1F,CHMP4A,HEXA,NAGPA,HOOK2,VPS33B,TPP1,ATP6V1H,CORO1A,CLN6,GBA,CHMP4B,ZFYVE26,ZKSCAN3,CHMP6,RNASEK,ACP2,NAGLU
GO:BP	leukocyte homeostasis	GO:0001776	FALSE	0.005258789198212498	2.2791142377980624	113	6042	56	21026	IL7R,GPR174,SH2B2,CASP3,SIT1,STAT5B,LYN,FADD,GPR183,PPP2R1A,XKR8,PMAIP1,BBIP1,SPNS2,TRAF3IP2,FOXP3,HMGB1,DNAJA3,TNFRSF13B,TNFRSF17,GCNT4,SOS2,AIM2,BTK,SLC37A4,FAS,ANXA1,SLC46A2,TCIRG1,DOCK11,PPP2R3C,SLC40A1,PRDX2,ABL1,SKIL,CCR2,TNFSF14,TSC22D3,AKT1,SPTA1,SLC15A4,LMO1,CXCL6,MPL,PKN1,CORO1A,NCKAP1L,TGFB1,ITPKB,MTHFD1,DOCK10,LGALS2,BAX,SLC39A3,SIVA1,RPS6
GO:BP	DNA repair	GO:0006281	FALSE	0.005316285612844017	2.2743916950073184	621	6042	231	21026	GADD45A,BCL7A,GEN1,MORF4L2,ABRAXAS1,ACTR2,TRIP12,UBE2A,TAF12,CDK7,YY1,TADA3,TP53,RAD21,PPP4R2,ARID1A,TAOK3,UBE2D3,EXD2,VCPIP1,EPC2,TRRAP,HMGA1,EP400,TERF2,CDKN2D,SENP3,UPF1,ZMPSTE24,MEN1,SUPT16H,UBE2W,NPAS2,ENY2,HMGB2,ING3,TRIM28,SUMO1,RAD23B,NEIL2,XRCC4,Q16594,MORF4L1,ZMYND8,IFFO1,NEIL1,DDX11,RNF138,KAT2A,TAF10,UIMC1,OGG1,SETD2,TAF7,TOP3B,BACH1,HMGB1,MCRS1,IER3,MUTYH,SMARCD3,NFRKB,ASTE1,PLK1,CIN…
GO:BP	pattern recognition receptor signaling pathway	GO:0002221	FALSE	0.005370659499335887	2.2699723810907337	267	6042	112	21026	IRAK3,LTF,CLEC4E,TLR2,FCRL3,IRGM,F2RL1,RNF135,NAIP,ZDHHC3,PPP6C,UFD1L,CHUK,RTN4,MFHAS1,UBQLN1,CD300A,PLCG2,TRAF6,NFKBIA,SARM1,RIOK3,TLR8,TAX1BP1,LYN,IRF3,IRF4,PYCARD,HSPA1A,XIAP,TLR9,BANF1,NR1H4,TLR4,NINJ1,NR1D1,NMI,TLR1,CYBA,SMPDL3A,TRIM25,HMGB1,LSM14A,GLTPD1,NLRX1,ZDHHC12,PUM2,LY96,LAMP2,MAPKAPK3,AIM2,CD36,IKBKB,NR1H3,BTK,NEK7,RNF34,SLC46A2,BRCC3,TBK1,LACC1,CASP1,USP15,AP3B1,LRRC19,NLRP1,TNIP1,…
GO:BP	neuron apoptotic process	GO:0051402	FALSE	0.0056766898846267125	2.2459048304661673	296	6042	122	21026	CDK5R1,EPHA4,CLU,GBE1,FOXQ1,NAIP,G6PD,CDC42,HYOU1,TP53,RAD21,TMBIM6,ROCK1,ATN1,CASP3,DNAJC5,MECP2,MAP3K5,GRN,RB1,NPR2,UCP2,NRBP2,SARM1,ADAM8,NR3C1,JAK2,PIK3CA,TRAF7,MAP2K4,SNX6,FOXO3,FADD,BID,RIPK1,CASP4,XIAP,NMNAT1,CTNNB1,CX3CR1,IL10,PIGT,ADARB1,CEBPB,CASP5,ATP13A2,MYBL2,SRPK2,MAP3K11,APP,GPX1,VEGFB,SIGMAR1,FAS,PINK1,PYCR1,ASCL1,NLRP1,BBC3,KRAS,ATM,MFSD8,COL6A1,CPEB4,ABL1,NONO,STXBP1,FBXW7,IL6ST…
GO:BP	regulation of cell cycle process	GO:0010564	FALSE	0.005780206691714074	2.2380566315680652	720	6042	263	21026	IGF1R,XPO1,BCL7A,EGF,MAPK14,CENPJ,GEN1,HECW2,RPS27L,INHBA,ABRAXAS1,SPHK1,GFI1B,CDCA8,MYC,WAC,CTDSP1,CALM2,CDK7,MIIP,CDC42,PIK3C3,ANAPC11,TP53,ANKK1,MTA3,CCNH,RAD21,CUL3,ARID1A,APC,TAOK3,RAE1,ZC3H12D,SH3GLB1,PDGFB,TERF2,CDKN2D,CHMP2A,PLCG2,ZMPSTE24,RB1,CDC14A,DACH1,CHMP3,NPR2,ZFP36L1,MED1,CHMP1B,NUMA1,SYF2,OPN1MW,KNTC1,CTDSP2,LYN,APBB1,CDKN1B,DAPK3,PKN2,BID,MYBBP1A,HSPA1A,VPS4B,UBXN2B,SPAST,CHMP7,…
GO:BP	lymphocyte mediated immunity	GO:0002449	FALSE	0.005993985902446787	2.22228428282794	381	6042	151	21026	KLRB1,SH2D1A,IL7R,FZD5,FCER1A,ARG1,C1RL,CD1C,CD8A,TNFSF13,XCL1,CLEC12B,BTN3A2,CLU,CR1,TBX21,IL1R1,SERPING1,SLAMF7,KLRC4,LAMP1,TNFSF12,CD27,KIF5B,INPP5D,IGLL5,PTPRC,IGLL1,TRAF6,EXOSC3,SUPT6H,LYST,TLR8,STAT5B,C4BPA,CCR6,CD46,FADD,LTA,FOXJ1,FCGR3A,B2M,IL10,LILRB4,RAB27A,CD28,TRAF3IP2,FOXP3,ARL8B,HMGB1,EXOSC6,SLA2,IL1B,MALT1,VAV1,PMS2,IL23R,MASP2,PRKCZ,FCER2,BTK,HPRT1,PRKAA1,FCGR2A,GNL1,CD40LG,CD19,A…
GO:BP	signal transduction by p53 class mediator	GO:0072331	FALSE	0.006007664276208421	2.221294344822792	164	6042	75	21026	HINT1,RPF2,PAK1IP1,RPS27L,NUAK1,RPS7,MYC,TP53,TRIM24,PPM1D,ZMPSTE24,SP100,FOXO3,DYRK1A,Q16594,HIPK1,PTTG1IP,MYBBP1A,PYCARD,ING2,CD44,RFFL,NOP2,PMAIP1,SNW1,SHISA5,RRN3,PPP1R13B,AEN,TAF9B,HNRNPK,RNF34,CDKN1A,ARMC10,USP15,SGK1,ELL3,BBC3,ATM,SESN2,MAGEA2B,BATF,KAT6A,AKT1,SOX4,DYRK2,ATAD5,USP10,POU4F1,WWOX,BOP1,TMEM109,TP53BP2,RPL23,NDRG1,SIRT1,PARK2,SNAI1,RRS1,USP28,RRP8,CHEK2,RPL26,EEF1E1,RPS20,RPL1…
GO:BP	positive regulation of B cell activation	GO:0050871	FALSE	0.006481630546067047	2.188315727450245	88	6042	46	21026	TNFSF13,FCRL3,IRS2,TBX21,TNFSF12,CD27,INPP5D,VAV3,PTPRC,EXOSC3,STAT5B,GPR183,TLR9,IL10,TLR4,CD28,EXOSC6,SYK,PMS2,BTK,SH3KBP1,CARD11,CDKN1A,SLC39A10,PPP2R3C,TNFRSF13C,TNFRSF4,BCL6,PELI1,CD320,ATAD5,CLCF1,EPHB2,TICAM1,NCKAP1L,TGFB1,CD81,IL2RG,CD40,MAD2L2,BAD,DDRGK1,KMT5C,SHLD1,IL4,TNIP2
GO:BP	regulation of adaptive immune response	GO:0002819	FALSE	0.006738692589850807	2.1714243551102124	217	6042	94	21026	IL7R,FZD5,ARG1,CD1C,TNFSF13,XCL1,SKAP1,CR1,TBX21,IL1R1,TNFSF12,NFKBID,PTPRC,TRAF6,EXOSC3,TNFRSF14,SUPT6H,JAK2,C4BPA,CD46,FADD,LTA,FOXJ1,PYCARD,B2M,IL10,LILRB4,BRD4,CD28,ASCL2,FOXP3,HMGB1,EXOSC6,IL1B,MALT1,PMS2,IL23R,PRKCZ,FCER2,BTK,PRKAA1,ANXA1,MR1,STX7,SECTM1,MAP3K7,CD7,IL18,KLHL22,BCL6,HLA-A,IL6ST,BATF,YWHAG,CCR2,FCGR1A,CD226,ATAD5,PLA2G4A,SLC15A4,CD1B,C17ORF99,CLCF1,IL1RL1,CR2,EPHB2,FUT7,GATA3…
GO:BP	regulation of B cell proliferation	GO:0030888	FALSE	0.006934376272917521	2.1589925963660765	66	6042	37	21026	IKZF3,FCRL3,IRS2,CASP3,INPP5D,VAV3,PTPRC,CD300A,LYN,TYROBP,GPR183,MZB1,TLR9,IL10,TLR4,TNFRSF13B,CD22,MNDA,BTK,CARD11,CDKN1A,SLC39A10,ATM,TNFRSF13C,TNFRSF4,BCL6,PELI1,CD320,ATAD5,CLCF1,EPHB2,TICAM1,PKN1,NCKAP1L,CD81,CD40,IL4
GO:BP	regulation of exocytosis	GO:0017157	FALSE	0.0070191829592287985	2.1537134372931708	181	6042	81	21026	GAB2,F2RL1,CD177,LAMP1,GNAI2,STXBP3,ITGB2,TSG101,HGS,CD300A,CHMP2A,RAP1B,FGR,RAP1A,RAB7A,VPS18,LYN,RAB21,LRRK2,C9ORF72,STX4,RAB2B,VPS4B,ITGAM,RAB27A,RAB5A,RPH3AL,ATP13A2,SYK,NSF,FES,WNT7A,SDCBP,FMR1,FBXL20,ANXA1,STXBP5,RAB3A,BCR,SNAPIN,CASK,HAP1,PRAM1,LGI3,AP1G1,SNF8,STXBP1,SCAMP5,FGG,CCR2,VAMP2,FBXO45,RIMS3,RAB27B,KLRC2,ANXA2,CPLX1,IL1RAPL1,RIMS2,SLC4A8,SYN1,P2RX1,PREPL,PFN2,PRKCB,NCKAP1L,GIT1,P…
GO:BP	protein secretion	GO:0009306	FALSE	0.00707291273673693	2.150401700066487	379	6042	150	21026	PFKFB2,VEGFC,RAB13,ABAT,FAM3B,TLR2,IRS2,SUCNR1,F2RL1,OLFM2,PAFAH1B1,SERP1,PCSK5,STXBP3,TMEM167A,PTPN23,MIDN,BLOC1S3,UCP2,ALOX5,HPS6,CAMK2G,ENY2,CYB5R4,ADAM8,JAK2,IL1RN,ARFIP1,APBB1,RAB10,PIM3,STX4,TTN,MYO18A,PLA2G6,ACVR1C,NR1H4,TLR4,SLC9B2,RAB27A,RFX3,ORAI1,NR1D1,PLEK,RPH3AL,RBM4,ATP13A2,NADK,LRRC8A,PRKAR1A,OSBP,DPH3,IL1B,RAB11B,BLK,PTPN11,SYBU,TMED2,FOXO1,RAB11FIP1,TBC1D1,SEL1L,ZBED6,IGF1,NR1H3,…
GO:BP	establishment of protein localization to extracellular region	GO:0035592	FALSE	0.007128574070968311	2.146997333407957	382	6042	151	21026	PFKFB2,VEGFC,RAB13,ABAT,FAM3B,TLR2,LTBP1,IRS2,SUCNR1,F2RL1,OLFM2,PAFAH1B1,SERP1,PCSK5,STXBP3,TMEM167A,PTPN23,MIDN,BLOC1S3,UCP2,ALOX5,HPS6,CAMK2G,ENY2,CYB5R4,ADAM8,JAK2,IL1RN,ARFIP1,APBB1,RAB10,PIM3,STX4,TTN,MYO18A,PLA2G6,ACVR1C,NR1H4,TLR4,SLC9B2,RAB27A,RFX3,ORAI1,NR1D1,PLEK,RPH3AL,RBM4,ATP13A2,NADK,LRRC8A,PRKAR1A,OSBP,DPH3,IL1B,RAB11B,BLK,PTPN11,SYBU,TMED2,FOXO1,RAB11FIP1,TBC1D1,SEL1L,ZBED6,IGF1,…
GO:BP	multivesicular body assembly	GO:0036258	FALSE	0.007136875218994924	2.1464918963740356	32	6042	22	21026	TSG101,HGS,CHMP2A,CHMP3,CHMP1B,VPS4B,CHMP7,CHMP1A,VPS37B,CHMP2B,SNF8,CHMP5,CHMP4A,VTA1,VPS37A,CHMP4B,IST1,RAB11A,MVB12A,VPS25,VPS28,CHMP6
GO:BP	positive regulation of lymphocyte proliferation	GO:0050671	FALSE	0.007186267567092345	2.14349661669602	143	6042	67	21026	HLA-DPB1,XCL1,FCRL3,IRS2,CD3E,VAV3,PTPRC,TRAF6,JAK2,STAT5B,CD46,CD6,FADD,GPR183,CCDC88B,PYCARD,TLR9,EBI3,FCGR3A,TLR4,CD28,FOXP3,SLC7A1,HMGB1,ZNF335,DNAJA3,SYK,IL1B,IL23R,IGF1,BTK,ANXA1,CARD11,CDKN1A,SLC39A10,ICOSLG,CD40LG,LILRB2,TGFBR2,TNFRSF13C,IL18,TNFRSF4,BCL6,HLA-A,IL6ST,PELI1,CCR2,CD320,TMIGD2,CD86,SPTA1,ATAD5,CLCF1,EPHB2,CD70,MPL,TICAM1,CORO1A,NCKAP1L,EFNB1,CD81,CD40,RPS3,CD276,CD24,DHPS,IL4
GO:BP	wound healing	GO:0042060	FALSE	0.007726597857673865	2.1120116906717583	433	6042	168	21026	GP6,SERPINB2,MYL9,PROS1,NRG1,THBS1,MAPK14,SELP,PEAR1,ITGB3,GP1BA,F13A1,AK3,HPSE,F5,SERPING1,AQP1,F2RL1,ITGB5,GP1BB,CTSG,TREML1,TOR1A,DGKA,MYL12A,PLEC,C6ORF89,PRCP,VAV3,STXBP3,PDGFB,GLA,TGFBR1,EPPK1,CHMP2A,PLCG2,PDCD10,F7,VEGFA,BLOC1S3,CHMP3,NPR2,ARFGEF1,CLIC1,ALOX5,HPS6,GNA13,TMX1,CHMP1B,JAK2,PIK3CA,LYN,ADIPOR2,C1GALT1C1,PIK3CG,HMOX1,VPS4B,ELK3,CHMP7,ITPR3,CD44,ENTPD2,TLR4,PAK1,PTEN,RAB27A,UBASH3…
GO:BP	alcohol metabolic process	GO:0006066	FALSE	0.007990264649791072	2.097438835950032	362	6042	144	21026	PNPLA2,PTS,CEBPA,CES1,CYP1B1,SPHK1,G6PD,TKTL1,AKR1C3,FECH,ISYNA1,SLC34A1,CYB5R3,LCAT,MECP2,RDH13,HSD17B6,NUDT3,CYP27A1,PLCG2,OSBPL1A,NPC2,LDLRAP1,GPD2,PPIP5K1,DHRS7,INPP5A,LBR,DPM1,NR1H4,TM7SF2,NFE2L1,PLEK,LPCAT3,NPC1,QKI,SOAT1,LEPR,BMP2,SULT1B1,GPR146,IDH3A,TPK1,MAPK1,SPR,APP,ASAH1,CYP3A4,SOAT2,IGF1,COQ3,PRKAA1,ITPK1,MOXD1,HMGCR,DPAGT1,SPTLC1,CACNA1H,SORD,STARD3,RDH5,GDE1,INPP4B,IDH1,HAO1,INSIG2…
GO:BP	regulation of response to endoplasmic reticulum stress	GO:1905897	FALSE	0.007990502791546542	2.0974258924351856	86	6042	45	21026	CLU,GRINA,HERPUD1,HYOU1,PPP1R15B,TMBIM6,UBQLN1,ALOX5,FICD,TMX1,LRRK2,COPS5,HSPA1A,USP13,PMAIP1,SYVN1,SERINC3,LPCAT3,USP14,USP25,TXNDC12,NR1H3,BBC3,UBQLN2,BFAR,PDX1,RNF183,MANF,USP19,PTPN1,SIRT1,PARK2,WFS1,EIF2AK3,UFL1,SGTA,ERP29,UBXN1,STUB1,BAX,DDRGK1,BCAP31,PARK7,RACK1,CREB3
GO:BP	mRNA transport	GO:0051028	FALSE	0.007992890861771384	2.097296117025625	130	6042	62	21026	XPO1,THOC1,SEC13,AAAS,RAE1,YTHDC1,RBM8A,UPF1,MVP,ZFP36L1,ENY2,SUPT6H,THOC6,NUP210,NUP160,THOC7,SMG6,BICD2,TNKS,FXR1,SETD2,EIF4A3,NUP153,QKI,NUP214,AGFG1,ZC3H11A,DHX9,DDX39B,NUP50,FMR1,PEG10,KIF5C,NUTF2,GLE1,SARNP,RANBP17,SHFM1,HSF1,HHEX,TPR,NUP43,SMG5,NXT1,UPF3A,DDX19A,IGF2BP1,NUP155,NUP62,PABPN1,NUP93,DDX39A,MCM3AP,IWS1,NUP205,PARP11,NUP107,RBM15B,NCBP2,THOC2,ZC3H3,ALKBH5
GO:BP	regulation of proteasomal ubiquitin-dependent protein catabolic process	GO:0032434	FALSE	0.007992890861771384	2.097296117025625	130	6042	62	21026	XPO1,TTC36,CEBPA,TRIB2,HSP90AB1,CLU,GSK3A,WAC,UBE2K,ZER1,USP38,SUMO1,RAD23B,LRRK2,Q16594,HSPA1A,CBFA2T3,PLK1,RFPL1,GSK3B,EIF3H,VCP,CDK2,SH3RF1,GABARAP,PRICKLE1,RCHY1,CHFR,AKT1,WNT10B,HSPBP1,TF,CSNK2A2,UBQLN4,BAG5,GBA,USP5,HECTD1,SIRT1,PHF20L1,MTM1,PARK2,UFL1,KEAP1,AXIN2,RNF180,ELOB,UBXN1,COMMD1,RBX1,RPL11,STUB1,DNAJB2,DDRGK1,NOP53,PARK7,RACK1,SIRT6,ZFAND2A,ARAF,FHIT,GIPC1
GO:BP	negative regulation of cellular component organization	GO:0051129	FALSE	0.00799539163052413	2.0971602587707796	701	6042	256	21026	IRAK3,EVL,TGFBR3,KREMEN1,SIRPA,KIAA0319,EPHA4,TLR2,THBS1,ITGB3,GEN1,CLU,IRGM,MPHOSPH9,DPP4,MCTP1,CDCA8,RLF,CDC42,SPTAN1,PAFAH1B1,TP53,MAPRE1,CAPZA1,RAD21,RTN4,APC,ROCK1,PHF2,HNRNPC,TERF2,PHF23,PICALM,CD300A,STYXL1,SSH1,CLIP3,FNIP1,SEC22B,VEGFA,SLC25A5,ARFGEF1,MID1IP1,RAB7A,RIOK3,MYLIP,PIK3CA,TINF2,HDAC2,KNTC1,GMFB,VIM,LRRK2,DYRK1A,SMG6,PTGER4,TBC1D4,GMFG,HSPA1A,EHMT2,PAK2,B2M,KAT2A,RAPGEF2,TNKS,S…
GO:BP	ribosomal small subunit biogenesis	GO:0042274	FALSE	0.008533322427553188	2.068881844445684	104	6042	52	21026	RPS3A,UTP20,RPS27L,RPS7,ERAL1,LSM6,RIOK3,METTL17,RRP36,KRI1,RPS19BP1,FCF1,NAT10,BMS1,TSR3,UTP6,SURF6,EXOSC10,NOL11,WDR3,AATF,RRP9,NOL10,PWP2,IMP3,NOP56,UTP15,RRS1,NHP2L1,NOM1,HEATR1,NOP58,RPS14,RPS27,RPS28,RPSA,RPS5,RPS21,RPS11,RPS6,RPS16,RPS15,RPS19,SLX9,RPS23,RPS9,RPS8,MCAT,TBL3,RPS15A,MRPS7,IMP4
GO:BP	positive regulation of protein modification process	GO:0031401	FALSE	0.008715039057276653	2.059730662217589	637	6042	235	21026	S100A12,LTF,HAX1,TNIK,ELANE,FGF9,EGF,MMP9,NRG1,EPHA4,THBS1,ITGB3,IRGM,SPHK1,GSK3A,CALM2,TP53,CD3E,CUL3,HDAC3,UBE2K,TAOK3,PDGFB,PTPRC,TOLLIP,SPDYE2,UBQLN1,PHF23,BRAT1,PLCG2,WDFY2,PDCD10,MAP3K5,CLIP3,TAB2,FNIP1,VEGFA,SLCO3A1,TRAF6,TNFRSF14,TXN,RAP1A,IQGAP1,JTB,PDCD6,JAK2,LYN,PIK3CG,LRRK2,DYRK1A,TRAF4,RIPK1,BAG4,HCLS1,PTTG1IP,HDAC4,XIAP,MAP2K3,RASSF2,PAK2,CD44,CAB39,CX3CR1,RAPGEF2,SYAP1,TANK,TLR4,PA…
GO:BP	positive regulation of hemopoiesis	GO:1903708	FALSE	0.008910199463816772	2.0501125737335686	193	6042	85	21026	IL7R,HAX1,RHOH,CD83,CR1,CD101,CD27,NFKBID,ARID1A,INPP5D,PTPRC,ZMIZ1,RB1,TRAF6,ZFP36L1,ADAM8,STAT5B,CD46,FOXO3,TYROBP,FADD,RIPK1,HCLS1,IL10,CTNNBIP1,LILRB4,BRD4,SLC9B2,FOXP3,HMGB1,SMARCD3,SYK,MALT1,EVI2B,FES,IL23R,CREB1,PRKCZ,RARA,BTK,NOTCH2,ANXA1,ACTB,SMARCD1,AP3B1,PPP2R3C,LILRB2,IL1RL2,TGFBR2,IL18,BCL6,HSF1,PF4,SOX4,CD86,POU4F1,WNT10B,VSIR,GATA3,XRCC6,PIK3R6,SMARCA4,KAT5,NCKAP1L,SMARCC2,TGFB1,PR…
GO:BP	positive regulation of leukocyte differentiation	GO:1902107	FALSE	0.008910199463816772	2.0501125737335686	193	6042	85	21026	IL7R,HAX1,RHOH,CD83,CR1,CD101,CD27,NFKBID,ARID1A,INPP5D,PTPRC,ZMIZ1,RB1,TRAF6,ZFP36L1,ADAM8,STAT5B,CD46,FOXO3,TYROBP,FADD,RIPK1,HCLS1,IL10,CTNNBIP1,LILRB4,BRD4,SLC9B2,FOXP3,HMGB1,SMARCD3,SYK,MALT1,EVI2B,FES,IL23R,CREB1,PRKCZ,RARA,BTK,NOTCH2,ANXA1,ACTB,SMARCD1,AP3B1,PPP2R3C,LILRB2,IL1RL2,TGFBR2,IL18,BCL6,HSF1,PF4,SOX4,CD86,POU4F1,WNT10B,VSIR,GATA3,XRCC6,PIK3R6,SMARCA4,KAT5,NCKAP1L,SMARCC2,TGFB1,PR…
GO:BP	actin filament organization	GO:0007015	FALSE	0.00910123533475147	2.0408996557389063	461	6042	177	21026	EVL,HAX1,PSTPIP2,SHTN1,RHOH,CYFIP1,HIP1,F2RL1,ITGB5,SH3BP1,ACTR2,ACTR3,ARPC2,ARPC3,CDC42,MARCKSL1,SPTAN1,BRK1,DIAPH1,PLEC,CAPZA1,CUL3,ROCK1,PXN,NEB,TGFBR1,PREX1,TNFAIP1,ARPC5,RHOQ,SSH1,MYO5A,FSCN1,ARFGEF1,VASP,IQGAP1,ABI2,JAK2,TPM4,PIK3CA,MICAL3,GMFB,ARFIP1,CAP1,C9ORF72,PTGER4,TTN,BAG4,HCLS1,GMFG,COTL1,PYCARD,USH1C,PAK2,TPM2,ADD3,MARCKS,CYFIP2,ZEB2,PAK1,PLEK,INPP5K,PLEKHG2,RHOF,MSRB2,EPHA1,HDAC6,…
GO:BP	transcription initiation at RNA polymerase II promoter	GO:0006367	FALSE	0.009157079265336382	2.0382430264652647	171	6042	77	21026	MED21,MYC,TAF12,CDK7,DR1,TP53,CCNH,ARID1A,PHF2,PPM1D,GTF2A1,USP21,MED13,ZMPSTE24,PABPC1L,MEN1,MAZ,NFKBIA,MED1,Q16594,TAF10,CTNNBIP1,ASH2L,OGG1,MED11,TAF7,MED23,MED26,MED30,HMGB1,E2F3,FOXO1,N6AMT1,TET2,MED8,MED15,GTF2A2,DPY30,MED12,RBM14,THRA,TAF4B,GTF2H1,CDK4,SMARCD1,ERCC3,ZNHIT1,GTF2E1,APEX1,GLYR1,TAF13,WNT10B,APOBEC3C,TAF6,TAF5,NOC2L,NFKB1,TAF4,ATAD2B,SMARCA4,MED29,APOBEC3F,GTF2E2,MED16,WDR5,TA…
GO:BP	response to decreased oxygen levels	GO:0036293	FALSE	0.009404461053760119	2.0266660877355727	316	6042	128	21026	HK2,RORA,PLOD2,VEGFC,TGFBR3,ABAT,AGTRAP,ALAS2,EPHA4,TLR2,THBS1,INHBA,AQP1,DPP4,ADM,MYC,RYR1,BNIP2,HYOU1,TP53,RAD21,RTN4,TMBIM6,CASP3,EPAS1,UBQLN1,MECP2,AQP3,ATP7A,F7,VEGFA,UCP2,ZFP36L1,ND5,ADAM8,FOXO3,CDKN1B,LTA,PMAIP1,ZEB2,ASCL2,SDHD,FOSL2,COX2,EGLN1,BMP2,CBFA2T3,ND4,PGK1,AK4,ADAM15,SMAD3,DNMT3A,VEGFB,PRKAA1,PINK1,LONP1,COX1,PDK1,ERCC3,PDK3,CHRNA7,MAP3K7,BBC3,ATM,SCFD1,CXCR4,COL6A1,CPEB4,ACAA2,P…
GO:BP	positive regulation of proteolysis involved in protein catabolic process	GO:1903052	FALSE	0.009850122034219403	2.0065583889480956	136	6042	64	21026	PYHIN1,CEBPA,EGF,TRIB2,CLU,GSK3A,HERPUD1,RNF139,PSMC1,UBQLN1,ZER1,TMX1,SUMO1,TRAF7,LRRK2,HSPA1A,USP13,PTEN,CBFA2T3,AGTPBP1,PLK1,RFPL1,GSK3B,FMR1,VCP,SH3RF1,UBQLN2,GABARAP,PRICKLE1,FBXW7,RCHY1,CHFR,TGFB1I1,AKT1,MAGEF1,HSPBP1,TF,CCDC22,PSMC4,PSMC3,GBA,USP5,HECTD1,SIRT1,PARK2,WFS1,UFL1,SGTA,KEAP1,PSMC5,AXIN2,RNF180,L3MBTL3,ELOB,RBX1,STUB1,DNAJB2,DDRGK1,NOP53,BCAP31,RACK1,SIRT6,OSBPL7,ZFAND2A
GO:BP	positive regulation of adaptive immune response	GO:0002821	FALSE	0.009850122034219403	2.0065583889480956	136	6042	64	21026	FZD5,CD1C,TNFSF13,XCL1,SKAP1,TBX21,IL1R1,TNFSF12,NFKBID,PTPRC,TRAF6,EXOSC3,JAK2,FADD,LTA,PYCARD,B2M,BRD4,CD28,FOXP3,EXOSC6,IL1B,MALT1,PMS2,IL23R,PRKCZ,FCER2,BTK,PRKAA1,MR1,STX7,SECTM1,MAP3K7,CD7,IL18,KLHL22,HLA-A,IL6ST,YWHAG,CCR2,FCGR1A,CD226,ATAD5,PLA2G4A,CD1B,C17ORF99,CLCF1,GATA3,TRAF2,IL27RA,TGFB1,SIRT1,FBXO38,CLEC7A,EIF2AK4,CD81,CD40,MAD2L2,HLA-B,CARD9,BRD2,KMT5C,SHLD1,IL4
GO:CC	cytoplasm	GO:0005737	TRUE	1.6671354448633262e-177	176.77802911488874	12527	6316	4511	22149	GZMK,RETN,FAM110B,GPR18,TDRD9,MMP8,MTARC1,GRB10,HK2,CAPNS2,IRAK3,ITM2A,IKZF3,TIMP2,PFKFB2,CKAP4,SH2D1A,OLFM4,STX17,PYHIN1,CD3G,TPST1,IL7R,CEACAM8,RPL9,PLOD2,KLHL20,FKBP5,KCNE1,ARL4C,PTX3,CCT2,ERAP2,MGST1,NDST1,DAO,KLF12,CEACAM6,FZD5,CHIC1,PLBD1,SIPA1L2,XPO1,CHIT1,ELAC1,CLEC3B,HLA-DPB1,VCAN,ARG1,SLC28A3,SPINK2,S100A12,LCN2,PNPLA2,EVL,PTS,BPI,HSPH1,GADD45A,TCN1,LTF,SYTL2,VEGFC,PRKAB2,CSRP3,HP,LHFPL…
GO:CC	cytosol	GO:0005829	FALSE	2.7015556201980727e-127	126.56838608668616	5534	6316	2299	22149	FAM110B,GRB10,HK2,CAPNS2,IKZF3,PFKFB2,SH2D1A,OLFM4,STX17,PYHIN1,CD3G,IL7R,RPL9,KLHL20,FKBP5,ARL4C,CCT2,DAO,KLF12,PLBD1,XPO1,ELAC1,ARG1,S100A12,PNPLA2,EVL,PTS,HSPH1,SYTL2,PRKAB2,CSRP3,TNIK,RNF144B,PSTPIP2,TUBGCP5,ABCD2,MIS18A,ALOX15B,NME7,CDK5R1,ELANE,OTUD3,SORT1,RPLP0,PGM5,PLEKHA1,RAB13,TGFBR3,THEM4,OLAH,WIPI1,IQCB1,KIF3C,TNFSF13,CLEC5A,RRAGD,CES1,CD163,CLIC4,SNRNP40,SH2B2,RPS3A,REPS2,FGD4,PRKACB…
GO:CC	nucleoplasm	GO:0005654	FALSE	4.514350183259323e-81	80.34540475523646	4255	6316	1739	22149	MAFG,IKZF3,PFKFB2,OLFM4,PYHIN1,DCAF16,ZNF134,IL7R,RORA,KLHL20,FKBP5,KLF12,TSHZ3,XPO1,ELAC1,PNPLA2,NARF,HSPH1,GADD45A,PRKAB2,BCL7A,CSRP3,TNIK,EOMES,MIS18A,CDK5R1,CEBPA,PLEKHA1,IQCB1,MAML1,ZNF22,ATXN1L,TNFSF13,RRAGD,MPO,SNRNP40,RPS3A,KDM7A,PRKACB,HINT1,SRPK1,DDX17,SKAP1,UTP20,RPF2,NRG1,RBIS,THOC1,S100B,PIWIL4,PRIM1,OLR1,DUSP5,MAPK14,SATB1,C12ORF57,SDAD1,ITGB3,ZNF473,HSP90AB1,ACTR6,GEN1,PTPN4,ZNF260…
GO:CC	organelle membrane	GO:0031090	FALSE	2.4151211966182895e-68	67.61706107041896	3842	6316	1560	22149	GPR18,MTARC1,HK2,CKAP4,STX17,CD3G,TPST1,IL7R,CEACAM8,PLOD2,ERAP2,MGST1,NDST1,DAO,CEACAM6,FZD5,XPO1,HLA-DPB1,SLC28A3,PNPLA2,LHFPL2,HAX1,RNF144B,ASPH,TM6SF1,RNF175,ABCD2,FAM209B,NDUFS4,SORT1,TRPM2,RAB13,CHST13,THEM4,NSG1,WIPI1,GALNT11,CD1C,ST3GAL6,CLEC4E,AGTRAP,CLEC5A,RRAGD,CD163,CLIC4,CYBRD1,ITGA2B,EGF,CRAT,MARCO,HSD3B7,PROS1,MAOA,CTSD,SLC22A14,SYP,GIMAP5,FUT8,ALAS2,SIRPA,ZDHHC19,KIAA0319,EPHA4,TL…
GO:CC	endomembrane system	GO:0012505	FALSE	1.6661832469941927e-64	63.77827723655351	4872	6316	1880	22149	GZMK,RETN,MMP8,HK2,ITM2A,TIMP2,CKAP4,OLFM4,STX17,TPST1,CEACAM8,PLOD2,KLHL20,PTX3,CCT2,ERAP2,MGST1,NDST1,CEACAM6,FZD5,XPO1,CHIT1,CLEC3B,HLA-DPB1,VCAN,ARG1,SLC28A3,SPINK2,S100A12,LCN2,PNPLA2,NARF,BPI,TCN1,LTF,SYTL2,VEGFC,HP,LHFPL2,HAX1,TNIK,CRISP3,ASPH,RNF175,FAM209B,NPIPB3,DEFA4,ELANE,SORT1,MS4A7,RPLP0,TRPM2,RAB13,CHST13,OCIAD2,NSG1,WIPI1,GALNT11,CD1C,ST3GAL6,ORM2,AGTRAP,CLEC5A,CES1,MPO,CLIC4,RPS3…
GO:CC	vesicle	GO:0031982	FALSE	8.56177536554766e-63	62.067436170893544	4033	6316	1603	22149	GZMK,RETN,GPR18,MMP8,TIMP2,CKAP4,OLFM4,STX17,CD3G,IL7R,HPR,CEACAM8,PLOD2,FKBP5,PTX3,TSPAN4,CCT2,MGST1,CEACAM6,FZD5,CHIC1,CHIT1,CLEC3B,HLA-DPB1,ARG1,SPINK2,S100A12,LCN2,BPI,HSPH1,TCN1,LTF,SYTL2,VEGFC,HP,LHFPL2,HAX1,TNIK,CRISP3,C1RL,ALOX15B,RNASE1,DEFA4,ELANE,GP6,SORT1,RPLP0,TRPM2,PLEKHA1,RAB13,TGFBR3,OCIAD2,NSG1,WIPI1,CD1C,IQCB1,ST3GAL6,ORM2,CLEC4E,TNFSF13,AGTRAP,CLEC5A,CD163,MPO,CLIC4,CYBRD1,RPS3…
GO:CC	intracellular organelle lumen	GO:0070013	FALSE	3.3186602695713863e-56	55.47903720393433	6695	6316	2413	22149	RETN,MAFG,MMP8,IKZF3,TIMP2,PFKFB2,CKAP4,OLFM4,PYHIN1,DCAF16,ZNF134,IL7R,RORA,KLHL20,FKBP5,PTX3,CCT2,ERAP2,DAO,KLF12,TSHZ3,XPO1,CHIT1,ELAC1,CLEC3B,VCAN,ARG1,S100A12,LCN2,PNPLA2,NARF,BPI,HSPH1,GADD45A,TCN1,LTF,VEGFC,PRKAB2,BCL7A,CSRP3,HP,HAX1,TNIK,GAS5,CRISP3,ASPH,EOMES,MIS18A,DEFA4,CDK5R1,ELANE,SNHG1,CEBPA,PLEKHA1,ABAT,THEM4,NSG1,IQCB1,MAML1,ZNF22,ATXN1L,ORM2,TNFSF13,PPM1K,RRAGD,CES1,MPO,CLIC4,SNR…
GO:CC	organelle lumen	GO:0043233	FALSE	3.3186602695713863e-56	55.47903720393433	6695	6316	2413	22149	RETN,MAFG,MMP8,IKZF3,TIMP2,PFKFB2,CKAP4,OLFM4,PYHIN1,DCAF16,ZNF134,IL7R,RORA,KLHL20,FKBP5,PTX3,CCT2,ERAP2,DAO,KLF12,TSHZ3,XPO1,CHIT1,ELAC1,CLEC3B,VCAN,ARG1,S100A12,LCN2,PNPLA2,NARF,BPI,HSPH1,GADD45A,TCN1,LTF,VEGFC,PRKAB2,BCL7A,CSRP3,HP,HAX1,TNIK,GAS5,CRISP3,ASPH,EOMES,MIS18A,DEFA4,CDK5R1,ELANE,SNHG1,CEBPA,PLEKHA1,ABAT,THEM4,NSG1,IQCB1,MAML1,ZNF22,ATXN1L,ORM2,TNFSF13,PPM1K,RRAGD,CES1,MPO,CLIC4,SNR…
GO:CC	membrane-enclosed lumen	GO:0031974	FALSE	3.3186602695713863e-56	55.47903720393433	6695	6316	2413	22149	RETN,MAFG,MMP8,IKZF3,TIMP2,PFKFB2,CKAP4,OLFM4,PYHIN1,DCAF16,ZNF134,IL7R,RORA,KLHL20,FKBP5,PTX3,CCT2,ERAP2,DAO,KLF12,TSHZ3,XPO1,CHIT1,ELAC1,CLEC3B,VCAN,ARG1,S100A12,LCN2,PNPLA2,NARF,BPI,HSPH1,GADD45A,TCN1,LTF,VEGFC,PRKAB2,BCL7A,CSRP3,HP,HAX1,TNIK,GAS5,CRISP3,ASPH,EOMES,MIS18A,DEFA4,CDK5R1,ELANE,SNHG1,CEBPA,PLEKHA1,ABAT,THEM4,NSG1,IQCB1,MAML1,ZNF22,ATXN1L,ORM2,TNFSF13,PPM1K,RRAGD,CES1,MPO,CLIC4,SNR…
GO:CC	catalytic complex	GO:1902494	FALSE	1.0754393484900457e-54	53.96841407747442	1779	6316	810	22149	MTARC1,CAPNS2,DCAF16,KLHL20,IGF1R,PRKAB2,BCL7A,RNF144B,NDUFS4,CDK5R1,ABAT,RRAGD,SNRNP40,PRKACB,HINT1,PRIM1,ANKRD9,NDUFA4,ACTR6,F13A1,PPP4R1,MORF4L2,CFDP1,MED21,PSMF1,POP5,GNB1,PSMD4,GSK3A,NDUFB1,UBE2A,PSMB4,TAF12,SRCAP,CALM2,DNHD1,COX6A1,CDK7,TXNL1,MBD2,DR1,YY1,ATP6V1D,PIK3C3,TADA3,CYB5R3,CRADD,ORMDL2,PAFAH1B1,POLR2F,ANAPC11,GMPR2,NDUFA1,PSMB10,MTA3,U2AF1,CCNH,NDUFB4,CHUK,CUL3,LMO7,FBXO44,PPP4R2,…
GO:CC	membrane-bounded organelle	GO:0043227	FALSE	7.296577469468901e-53	52.136880802163276	15780	6316	4967	22149	GZMK,RETN,MAFG,FAM110B,GPR18,TDRD9,MMP8,MTARC1,HK2,IRAK3,ITM2A,IKZF3,TIMP2,PFKFB2,CKAP4,OLFM4,STX17,PYHIN1,CD3G,DCAF16,TPST1,ZNF134,KLRG1,IL7R,HPR,CEACAM8,RPL9,RORA,PLOD2,KLHL20,FKBP5,KCNE1,ARL4C,PTX3,TSPAN4,CCT2,ERAP2,MGST1,NDST1,DAO,KLF12,CEACAM6,TSHZ3,FZD5,CHIC1,PLBD1,IGF1R,XPO1,ATF7IP2,CHIT1,ELAC1,CLEC3B,HLA-DPB1,VCAN,ARG1,SLC28A3,SPINK2,S100A12,LCN2,PNPLA2,PTS,NARF,BPI,HSPH1,GADD45A,TCN1,ZNF…
GO:CC	intracellular vesicle	GO:0097708	FALSE	1.1188432349146216e-51	50.95123075974594	2562	6316	1074	22149	GZMK,RETN,GPR18,MMP8,TIMP2,CKAP4,OLFM4,STX17,CD3G,IL7R,CEACAM8,PTX3,CCT2,MGST1,CEACAM6,FZD5,CHIC1,CHIT1,CLEC3B,HLA-DPB1,ARG1,SPINK2,S100A12,LCN2,BPI,HSPH1,TCN1,LTF,SYTL2,VEGFC,HP,LHFPL2,HAX1,TNIK,CRISP3,DEFA4,ELANE,SORT1,TRPM2,RAB13,OCIAD2,NSG1,WIPI1,CD1C,ORM2,CLEC4E,AGTRAP,CLEC5A,CD163,MPO,CLIC4,ITGA2B,EGF,MARCO,PROS1,MMP9,CTSD,CAMP,SYP,GIMAP5,PGLYRP1,RHOH,SIRPA,KIAA0319,EPHA4,TLR2,CYFIP1,FOLR3,…
GO:CC	membrane	GO:0016020	FALSE	1.2228421038433725e-51	50.912629616435936	9953	6316	3356	22149	GPR18,MTARC1,GRB10,HK2,CAPNS2,APCDD1,TRAV16,GPR171,IRAK3,CACNB2,TRAV5,ITM2A,CKAP4,KLRB1,OLFM4,STX17,CD3G,TPST1,KLRG1,IL7R,CEACAM8,RPL9,PLOD2,FKBP5,KCNE1,ARL4C,TSPAN4,ERAP2,MGST1,NDST1,DAO,CEACAM6,TSHZ3,FZD5,FCER1A,CHIC1,LTB4R,IGF1R,XPO1,HLA-DPB1,VCAN,SLC28A3,TRGC2,S100A12,PNPLA2,EVL,DLGAP3,BPI,KCNA3,LTF,PLXDC2,SYTL2,VEGFC,LHFPL2,HAX1,TNIK,RNF144B,CRISP3,PSTPIP2,ASPH,TM6SF1,RNF175,ABCD2,TRGV9,TNS2…
GO:CC	cytoplasmic vesicle	GO:0031410	FALSE	2.148195348833813e-51	50.6679262280642	2556	6316	1071	22149	GZMK,RETN,GPR18,MMP8,TIMP2,CKAP4,OLFM4,STX17,CD3G,IL7R,CEACAM8,PTX3,CCT2,MGST1,CEACAM6,FZD5,CHIC1,CHIT1,CLEC3B,HLA-DPB1,ARG1,SPINK2,S100A12,LCN2,BPI,HSPH1,TCN1,LTF,SYTL2,VEGFC,HP,LHFPL2,HAX1,TNIK,CRISP3,DEFA4,ELANE,SORT1,TRPM2,RAB13,OCIAD2,NSG1,WIPI1,CD1C,ORM2,CLEC4E,AGTRAP,CLEC5A,CD163,MPO,CLIC4,ITGA2B,EGF,MARCO,PROS1,MMP9,CTSD,CAMP,SYP,GIMAP5,PGLYRP1,RHOH,SIRPA,KIAA0319,EPHA4,TLR2,CYFIP1,FOLR3,…
GO:CC	intracellular membrane-bounded organelle	GO:0043231	FALSE	1.0825697414072542e-47	46.965544115914376	14727	6316	4665	22149	GZMK,RETN,MAFG,FAM110B,GPR18,TDRD9,MMP8,MTARC1,HK2,IRAK3,ITM2A,IKZF3,TIMP2,PFKFB2,CKAP4,OLFM4,STX17,PYHIN1,CD3G,DCAF16,TPST1,ZNF134,KLRG1,IL7R,CEACAM8,RPL9,RORA,PLOD2,KLHL20,FKBP5,KCNE1,ARL4C,PTX3,CCT2,ERAP2,MGST1,NDST1,DAO,KLF12,CEACAM6,TSHZ3,FZD5,CHIC1,PLBD1,IGF1R,XPO1,ATF7IP2,CHIT1,ELAC1,CLEC3B,HLA-DPB1,VCAN,ARG1,SLC28A3,SPINK2,S100A12,LCN2,PNPLA2,PTS,NARF,BPI,HSPH1,GADD45A,TCN1,ZNF141,PLTP,LT…
GO:CC	intracellular anatomical structure	GO:0005622	FALSE	2.566790463296573e-47	46.59060958296405	17944	6316	5496	22149	GZMK,RETN,MAFG,FAM110B,GPR18,TDRD9,MMP8,MTARC1,GRB10,HK2,CAPNS2,IRAK3,ITM2A,IKZF3,TIMP2,PFKFB2,CKAP4,SH2D1A,OLFM4,STX17,PYHIN1,CD3G,DCAF16,TPST1,ZNF134,KLRG1,IL7R,CEACAM8,RPL9,RORA,PLOD2,KLHL20,FKBP5,KCNE1,ARL4C,PTX3,CCT2,ERAP2,MGST1,NDST1,DAO,KLF12,CEACAM6,TSHZ3,FZD5,CHIC1,PLBD1,SIPA1L2,IGF1R,XPO1,ATF7IP2,CHIT1,ELAC1,CLEC3B,HLA-DPB1,VCAN,ARG1,SLC28A3,SPINK2,S100A12,LCN2,PNPLA2,EVL,PTS,NARF,BPI,H…
T2B	ARHGAP4	DMAC2	RPS27A	CWC25	SNORA46	PEX16	CCR3	COA6	ALDH4A1	SWSAP1	NUDT2	NUDT16L1	FUT1	SHLD1	RAB44	NDUFB9	HSD11B2	ZNF414	URM1	TOMM22	CYTH2	CERS4	TIMM44	MRPL37	KSR2	PRMT7	RPS8	MCAT	CHMP6	ITPKC	SIRT6	WDR24	AAMP	MPC1L	ZNF214	STEAP2	PPIAL4A	PEF1	AP4M1	PCBD1	SORBS3	CTDNEP1	AP5Z1	FBXO27	MAP2K2	MRPL34	REXO5	TNK2	UBE2M
GO:CC	bounding membrane of organelle	GO:0098588	FALSE	8.603453360378255e-44	43.06532719127773	2251	6316	941	22149	MTARC1,HK2,CKAP4,STX17,CD3G,TPST1,IL7R,CEACAM8,PLOD2,MGST1,NDST1,DAO,CEACAM6,FZD5,HLA-DPB1,LHFPL2,HAX1,ASPH,TM6SF1,RNF175,ABCD2,SORT1,TRPM2,RAB13,CHST13,NSG1,WIPI1,GALNT11,CD1C,ST3GAL6,CLEC4E,AGTRAP,CLEC5A,RRAGD,CD163,CYBRD1,ITGA2B,EGF,MARCO,PROS1,MAOA,CTSD,SYP,GIMAP5,FUT8,SIRPA,ZDHHC19,KIAA0319,EPHA4,TLR2,OLR1,SEC31B,B4GALT5,SELP,ITGB3,AZU1,CD3D,ATP8B4,CR1,ABCA13,C3AR1,HIP1,IFI27,HPSE,F5,ATP7B,I…
GO:CC	organelle	GO:0043226	FALSE	4.781836895321485e-38	37.32040524140927	16936	6316	5201	22149	GZMK,RETN,MAFG,FAM110B,GPR18,TDRD9,MMP8,MTARC1,HK2,IRAK3,ITM2A,IKZF3,TIMP2,PFKFB2,CKAP4,OLFM4,STX17,PYHIN1,CD3G,DCAF16,TPST1,ZNF134,KLRG1,IL7R,HPR,CEACAM8,RPL9,RORA,PLOD2,KLHL20,FKBP5,KCNE1,ARL4C,PTX3,TSPAN4,CCT2,ERAP2,MGST1,NDST1,DAO,KLF12,CEACAM6,TSHZ3,FZD5,CHIC1,PLBD1,IGF1R,XPO1,ATF7IP2,CHIT1,ELAC1,CLEC3B,HLA-DPB1,VCAN,ARG1,SLC28A3,SPINK2,S100A12,LCN2,PNPLA2,EVL,DLGAP3,PTS,NARF,BPI,HSPH1,GADD4…
	SNORA74C-1	U2AF1L4	RPL23A	DMAC1	TRMT9B	DOC2A	PTPN5	GAPDH	RPL7A	SNRPF	GATD1	OGFR	STMN4	MYRF	PTGES2	TRIM55	PPOX	TEN1	TRIM11	MFNG	SAYSD1	LRP1	RNA5SP241	PPP4C	NME2	RNA5SP145	GIPC1	KARS1	COPZ2	ZNF428"
GO:CC	extracellular membrane-bounded organelle	GO:0065010	FALSE	5.484977450707855e-36	35.26082515351375	2142	6316	876	22149	RETN,CKAP4,OLFM4,HPR,CEACAM8,PLOD2,FKBP5,CCT2,CLEC3B,LCN2,BPI,HSPH1,LTF,HP,TNIK,C1RL,ALOX15B,RNASE1,ELANE,GP6,RPLP0,PLEKHA1,RAB13,TGFBR3,IQCB1,ST3GAL6,ORM2,TNFSF13,MPO,CLIC4,CYBRD1,RPS3A,ITGA2B,EGF,PRKACB,PROS1,HINT1,FAM3B,MMP9,CTSD,CAMP,PGLYRP1,FUT8,SIRPA,HTRA1,CYFIP1,SLC23A1,THBS1,DSC2,ITGB3,AZU1,HSP90AB1,GP1BA,SLPI,BDH2,CLU,CR1,GBE1,F5,SERPING1,SLC7A5,SUCNR1,PZP,H4C3,PTGS1,AQP1,S100P,OSCAR,DPP…
GO:CC	extracellular organelle	GO:0043230	FALSE	5.484977450707855e-36	35.26082515351375	2142	6316	876	22149	RETN,CKAP4,OLFM4,HPR,CEACAM8,PLOD2,FKBP5,CCT2,CLEC3B,LCN2,BPI,HSPH1,LTF,HP,TNIK,C1RL,ALOX15B,RNASE1,ELANE,GP6,RPLP0,PLEKHA1,RAB13,TGFBR3,IQCB1,ST3GAL6,ORM2,TNFSF13,MPO,CLIC4,CYBRD1,RPS3A,ITGA2B,EGF,PRKACB,PROS1,HINT1,FAM3B,MMP9,CTSD,CAMP,PGLYRP1,FUT8,SIRPA,HTRA1,CYFIP1,SLC23A1,THBS1,DSC2,ITGB3,AZU1,HSP90AB1,GP1BA,SLPI,BDH2,CLU,CR1,GBE1,F5,SERPING1,SLC7A5,SUCNR1,PZP,H4C3,PTGS1,AQP1,S100P,OSCAR,DPP…
GO:CC	extracellular vesicle	GO:1903561	FALSE	8.261334447494625e-36	35.08294979573359	2141	6316	875	22149	RETN,CKAP4,OLFM4,HPR,CEACAM8,PLOD2,FKBP5,CCT2,CLEC3B,LCN2,BPI,HSPH1,LTF,HP,TNIK,C1RL,ALOX15B,RNASE1,ELANE,GP6,RPLP0,PLEKHA1,RAB13,TGFBR3,IQCB1,ST3GAL6,ORM2,TNFSF13,MPO,CLIC4,CYBRD1,RPS3A,ITGA2B,EGF,PRKACB,PROS1,HINT1,FAM3B,MMP9,CTSD,CAMP,PGLYRP1,FUT8,SIRPA,HTRA1,CYFIP1,SLC23A1,THBS1,DSC2,ITGB3,AZU1,HSP90AB1,GP1BA,SLPI,BDH2,CLU,CR1,GBE1,F5,SERPING1,SLC7A5,SUCNR1,PZP,H4C3,PTGS1,AQP1,S100P,OSCAR,DPP…
GO:CC	extracellular exosome	GO:0070062	FALSE	1.4029367306468775e-35	34.85296191425355	2111	6316	864	22149	RETN,CKAP4,OLFM4,HPR,CEACAM8,PLOD2,FKBP5,CCT2,CLEC3B,LCN2,BPI,HSPH1,LTF,HP,TNIK,C1RL,ALOX15B,RNASE1,ELANE,GP6,RPLP0,PLEKHA1,RAB13,TGFBR3,IQCB1,ST3GAL6,ORM2,TNFSF13,MPO,CLIC4,CYBRD1,RPS3A,ITGA2B,EGF,PRKACB,PROS1,HINT1,FAM3B,MMP9,CTSD,CAMP,PGLYRP1,FUT8,SIRPA,HTRA1,CYFIP1,SLC23A1,THBS1,DSC2,ITGB3,AZU1,HSP90AB1,GP1BA,SLPI,BDH2,CLU,CR1,GBE1,SERPING1,SLC7A5,SUCNR1,PZP,H4C3,PTGS1,AQP1,S100P,OSCAR,DPP4,G…
GO:CC	nuclear lumen	GO:0031981	FALSE	6.095228705193019e-35	34.215009994140786	5540	6316	1956	22149	MAFG,IKZF3,PFKFB2,OLFM4,PYHIN1,DCAF16,ZNF134,IL7R,RORA,KLHL20,FKBP5,KLF12,TSHZ3,XPO1,ELAC1,CLEC3B,PNPLA2,NARF,HSPH1,GADD45A,PRKAB2,BCL7A,CSRP3,TNIK,GAS5,EOMES,MIS18A,CDK5R1,SNHG1,CEBPA,PLEKHA1,IQCB1,MAML1,ZNF22,ATXN1L,TNFSF13,RRAGD,MPO,CLIC4,SNRNP40,RPS3A,KDM7A,PRKACB,HINT1,SRPK1,DDX17,SKAP1,UTP20,RPF2,NRG1,RBIS,ZDHHC19,THOC1,S100B,PIWIL4,PAK1IP1,PRIM1,OLR1,DUSP5,MAPK14,SATB1,C12ORF57,SDAD1,ITGB3…
GO:CC	intracellular organelle	GO:0043229	FALSE	1.7216074038132899e-34	33.76406587831602	16147	6316	4977	22149	GZMK,RETN,MAFG,FAM110B,GPR18,TDRD9,MMP8,MTARC1,HK2,IRAK3,ITM2A,IKZF3,TIMP2,PFKFB2,CKAP4,OLFM4,STX17,PYHIN1,CD3G,DCAF16,TPST1,ZNF134,KLRG1,IL7R,CEACAM8,RPL9,RORA,PLOD2,KLHL20,FKBP5,KCNE1,ARL4C,PTX3,CCT2,ERAP2,MGST1,NDST1,DAO,KLF12,CEACAM6,TSHZ3,FZD5,CHIC1,PLBD1,IGF1R,XPO1,ATF7IP2,CHIT1,ELAC1,CLEC3B,HLA-DPB1,VCAN,ARG1,SLC28A3,SPINK2,S100A12,LCN2,PNPLA2,EVL,PTS,NARF,BPI,HSPH1,GADD45A,TCN1,ZNF141,PLT…
GO:CC	organelle envelope	GO:0031967	FALSE	5.156002077345105e-34	33.28768691634204	1329	6316	588	22149	MTARC1,HK2,MGST1,DAO,XPO1,NARF,HAX1,RNF144B,FAM209B,NPIPB3,NDUFS4,SORT1,THEM4,CRAT,MAOA,SLC22A14,ALAS2,EPHA4,NDUFA4,MRPL13,CLU,GUF1,IFI27,MRPS28,IRGM,AQP1,KPNA3,ABCD1,FAM169A,NDUFAF4,SCAI,FECH,SLC25A40,MYC,TOR1A,BNIP2,NDUFB1,COX6A1,CBX3,CYB5R3,SEC13,ERAL1,PAFAH1B1,NDUFA1,PLEC,UQCR11,TIMM8B,NDUFB4,MRPS18C,LMO7,RTN4,SURF1,AAAS,CBX5,PLSCR3,NDUFA2,COX7A2,KPNB1,PTRH2,TMEM11,NDUFB3,BROX,TMBIM6,RAE1,COX…
GO:CC	mitochondrion	GO:0005739	FALSE	4.282856993731005e-30	29.36826642662383	1844	6316	753	22149	FAM110B,MTARC1,HK2,OLFM4,STX17,ARL4C,MGST1,DAO,PTS,HAX1,RNF144B,NDUFS4,ABAT,OSGEPL1,OCIAD2,THEM4,PPM1K,CLIC4,CRAT,MAOA,SLC22A14,ALAS2,EPHA4,PIWIL4,ECHDC2,PTGR3,CYP1B1,MAPK14,HSP90AB1,NDUFA4,ECHDC3,MTRF1,MRPL13,FOXO3B,CLU,GUF1,OXNAD1,AK3,IFI27,ATP7B,MRPS28,IRGM,ABCD1,PDK4,NDUFAF4,FECH,SLC25A40,CMPK2,HK3,GSK3A,NDUFB1,PSMB4,NAIF1,COX6A1,FASTKD5,NACC2,PPP6C,CYB5R3,ERAL1,CCM2,TP53,NDUFA1,PLEC,MPST,UQC…
GO:CC	secretory granule	GO:0030141	FALSE	5.019491587301108e-28	27.29934026931145	907	6316	418	22149	GZMK,RETN,MMP8,TIMP2,CKAP4,OLFM4,CEACAM8,PTX3,CCT2,MGST1,CEACAM6,CHIT1,CLEC3B,ARG1,SPINK2,S100A12,LCN2,BPI,TCN1,LTF,VEGFC,HP,LHFPL2,CRISP3,DEFA4,ELANE,TRPM2,RAB13,ORM2,CLEC5A,MPO,ITGA2B,EGF,PROS1,MMP9,CTSD,CAMP,PGLYRP1,SIRPA,TLR2,CYFIP1,FOLR3,OLR1,THBS1,MAPK14,SELP,ITGB3,AZU1,HSP90AB1,SLPI,CLU,F13A1,ATP8B4,CR1,ABCA13,C3AR1,RNASE3,HPSE,F5,SERPING1,MCEMP1,S100P,OSCAR,CD177,TNFAIP6,CTSG,CD63,TREML1,…
GO:CC	secretory vesicle	GO:0099503	FALSE	1.1984483601795279e-26	25.921380674498284	1099	6316	483	22149	GZMK,RETN,MMP8,TIMP2,CKAP4,OLFM4,CEACAM8,PTX3,CCT2,MGST1,CEACAM6,CHIT1,CLEC3B,ARG1,SPINK2,S100A12,LCN2,BPI,TCN1,LTF,SYTL2,VEGFC,HP,LHFPL2,CRISP3,DEFA4,ELANE,TRPM2,RAB13,ORM2,CLEC5A,MPO,ITGA2B,EGF,PROS1,MMP9,CTSD,CAMP,SYP,PGLYRP1,SIRPA,TLR2,CYFIP1,FOLR3,OLR1,THBS1,MAPK14,SELP,ITGB3,AZU1,HSP90AB1,SLPI,CLU,F13A1,ATP8B4,CR1,ABCA13,C3AR1,RNASE3,HPSE,F5,SERPING1,MCEMP1,S100P,OSCAR,CD177,TNFAIP6,MCTP1,C…
GO:CC	cellular anatomical structure	GO:0110165	FALSE	1.3538379596765532e-25	24.868433313073048	21620	6316	6267	22149	GZMK,RETN,MAFG,FAM110B,GPR18,TDRD9,MMP8,MTARC1,GRB10,HK2,CAPNS2,APCDD1,TRAV16,GPR171,IRAK3,CACNB2,TRAV5,ITM2A,IKZF3,TIMP2,PFKFB2,CKAP4,KLRB1,SH2D1A,OLFM4,STX17,PYHIN1,CD3G,DCAF16,TPST1,ZNF134,KLRG1,IL7R,HPR,CEACAM8,RPL9,RORA,PLOD2,KLHL20,FKBP5,KCNE1,ARL4C,PTX3,TSPAN4,CCT2,ERAP2,MGST1,NDST1,DAO,KLF12,CEACAM6,TSHZ3,FZD5,FCER1A,CHIC1,PLBD1,SIPA1L2,LTB4R,IGF1R,XPO1,ATF7IP2,CHIT1,ELAC1,CLEC3B,HLA-DPB1…
IAS3	TAF3	SEMA3B	SLC38A11	FZD3	NCBP2	DYNLRB1	AXIN2	CHST12	MDC1	RBM4B	ZSCAN29	RTN4IP1	CAPN7	MICALL1	MRPL3	ATXN7L3	TTF2	RAPGEF1	ZNF490	CD81	RLBP1	SERPINH1	ELMO1	LSM2	NBEAL2	EEA1	GTSF1	ZNF426	RPGR	TCP1	USP24	DYNC1LI1	SBK1	ALKBH1	KLF5	PFDN5	YLPM1	EIF4A2	RPA1	ANKLE2	G3BP1	DHX29	ELOVL1	SLC13A4	UBN2	MED10	TRIP6	UBAC2	DDX21
GO:CC	vesicle membrane	GO:0012506	FALSE	2.5525051959953884e-25	24.5930333651706	1271	6316	539	22149	GPR18,CKAP4,STX17,CD3G,IL7R,CEACAM8,MGST1,CEACAM6,FZD5,HLA-DPB1,LHFPL2,SORT1,TRPM2,RAB13,NSG1,WIPI1,CD1C,CLEC4E,AGTRAP,CLEC5A,CD163,CLIC4,ITGA2B,EGF,MARCO,CTSD,SYP,GIMAP5,SIRPA,KIAA0319,EPHA4,TLR2,OLR1,SEC31B,SELP,ITGB3,AZU1,CD3D,ATP8B4,CR1,ABCA13,C3AR1,HIP1,IRGM,SPHK1,PLIN3,MCEMP1,CD177,TMEM45B,CD8B,MCTP1,CLTCL1,CD63,TOR1A,LAMP1,COPB2,LAMTOR2,ARPC2,ATP6V1D,PIK3C3,SCYL2,SEC13,DIAPH1,AGPAT2,ARHGAP…
GO:CC	cytoplasmic vesicle membrane	GO:0030659	FALSE	3.2968239293187862e-25	24.481904246234805	1252	6316	532	22149	GPR18,CKAP4,STX17,CD3G,IL7R,CEACAM8,MGST1,CEACAM6,FZD5,HLA-DPB1,LHFPL2,SORT1,TRPM2,RAB13,NSG1,WIPI1,CD1C,CLEC4E,AGTRAP,CLEC5A,CD163,CLIC4,ITGA2B,EGF,MARCO,CTSD,SYP,GIMAP5,SIRPA,KIAA0319,EPHA4,TLR2,OLR1,SEC31B,SELP,ITGB3,AZU1,CD3D,ATP8B4,CR1,ABCA13,C3AR1,HIP1,IRGM,SPHK1,PLIN3,MCEMP1,CD177,TMEM45B,CD8B,MCTP1,CLTCL1,CD63,TOR1A,LAMP1,COPB2,LAMTOR2,ARPC2,ATP6V1D,PIK3C3,SCYL2,SEC13,DIAPH1,AGPAT2,ARHGAP…
GO:CC	secretory granule lumen	GO:0034774	FALSE	6.722399008279433e-23	22.172475713534027	323	6316	181	22149	RETN,MMP8,TIMP2,OLFM4,PTX3,CCT2,CHIT1,CLEC3B,ARG1,S100A12,LCN2,BPI,TCN1,LTF,VEGFC,HP,CRISP3,DEFA4,ELANE,ORM2,MPO,EGF,PROS1,CTSD,CAMP,PGLYRP1,CYFIP1,FOLR3,THBS1,MAPK14,AZU1,HSP90AB1,SLPI,CLU,F13A1,RNASE3,HPSE,F5,SERPING1,S100P,OSCAR,CTSG,HK3,ACTR2,OSTF1,SPTAN1,CYB5R3,PRDX6,KPNB1,ROCK1,PDGFB,GLA,PSMD13,PGM2,SRP14,TOLLIP,PSMD7,PSMD6,CREG1,ARPC5,GRN,VEGFA,IMPDH1,DYNLT1,ALOX5,STK11IP,MVP,FGR,GNS,TXNDC…
GO:CC	vacuole	GO:0005773	FALSE	1.7094635060931622e-22	21.767140166158136	867	6316	387	22149	RETN,CKAP4,STX17,CEACAM8,KCNE1,CCT2,MGST1,CEACAM6,PLBD1,CHIT1,HLA-DPB1,VCAN,ARG1,BPI,TM6SF1,DEFA4,ELANE,SORT1,TRPM2,OCIAD2,NSG1,WIPI1,CD1C,ORM2,RRAGD,MPO,CYBRD1,EGF,CTSD,GIMAP5,AZU1,ABCA13,C3AR1,RNASE3,HPSE,IRGM,SLC7A5,ABCD1,DPP4,EPDR1,TMEM45B,CTSG,CD63,TFEB,GNB1,LAMP1,ACTR2,UBE2A,LAMTOR2,ATP6V1D,YWHAB,CDC42,PIK3C3,CYB5R3,SEC13,SZT2,PRDX6,KIF5B,TMEM30A,GAA,NAPG,PRCP,VTI1A,SH3GLB1,GLA,KCNQ1,GNAI3,…
GO:CC	ribosomal subunit	GO:0044391	FALSE	2.3194066846120393e-22	21.6346	187	6316	121	22149	RPL9,RPLP0,RPS3A,MRPL13,RPS27L,RPL36A,MRPS28,RPS7,MRPS18C,RPL26L1,MRPL33,CHCHD1,METTL17,MRPL38,RPL10L,RPL10,RPL28,RPL13A,MRPS6,MRPS35,AURKAIP1,MRPL28,NSUN3,RPL13,RPL3,RPL27A,Q6P4E4,MRPL20,NSUN4,MRPL19,MRPL22,MRPS5,MRPS18B,RPL23,RBM3,MRPS33,RPL34,MRPS26,MRPL17,NHP2L1,RPL26,RPL31,MRPL3,DHX29,RPL7,MRPL40,MRPL52,RPLP1,MRPS34,RPL41,FAU,RPS14,MRPL27,MRPL14,MRPL48,RPL35,RPL30,MRPL12,RPS27,MRPL51,RPL12,R…
GO:CC	cytoplasmic vesicle lumen	GO:0060205	FALSE	7.531822111745595e-22	21.123099945798177	328	6316	181	22149	RETN,MMP8,TIMP2,OLFM4,PTX3,CCT2,CHIT1,CLEC3B,ARG1,S100A12,LCN2,BPI,TCN1,LTF,VEGFC,HP,CRISP3,DEFA4,ELANE,ORM2,MPO,EGF,PROS1,CTSD,CAMP,PGLYRP1,CYFIP1,FOLR3,THBS1,MAPK14,AZU1,HSP90AB1,SLPI,CLU,F13A1,RNASE3,HPSE,F5,SERPING1,S100P,OSCAR,CTSG,HK3,ACTR2,OSTF1,SPTAN1,CYB5R3,PRDX6,KPNB1,ROCK1,PDGFB,GLA,PSMD13,PGM2,SRP14,TOLLIP,PSMD7,PSMD6,CREG1,ARPC5,GRN,VEGFA,IMPDH1,DYNLT1,ALOX5,STK11IP,MVP,FGR,GNS,TXNDC…
GO:CC	vesicle lumen	GO:0031983	FALSE	1.2073484717190094e-21	20.918167363289264	329	6316	181	22149	RETN,MMP8,TIMP2,OLFM4,PTX3,CCT2,CHIT1,CLEC3B,ARG1,S100A12,LCN2,BPI,TCN1,LTF,VEGFC,HP,CRISP3,DEFA4,ELANE,ORM2,MPO,EGF,PROS1,CTSD,CAMP,PGLYRP1,CYFIP1,FOLR3,THBS1,MAPK14,AZU1,HSP90AB1,SLPI,CLU,F13A1,RNASE3,HPSE,F5,SERPING1,S100P,OSCAR,CTSG,HK3,ACTR2,OSTF1,SPTAN1,CYB5R3,PRDX6,KPNB1,ROCK1,PDGFB,GLA,PSMD13,PGM2,SRP14,TOLLIP,PSMD7,PSMD6,CREG1,ARPC5,GRN,VEGFA,IMPDH1,DYNLT1,ALOX5,STK11IP,MVP,FGR,GNS,TXNDC…
GO:CC	extracellular space	GO:0005615	FALSE	8.396282587817124e-21	20.075912953097696	3315	6316	1187	22149	RETN,MMP8,TIMP2,CKAP4,OLFM4,HPR,CEACAM8,PLOD2,FKBP5,PTX3,CCT2,ERAP2,CEACAM6,PLBD1,CHIT1,CLEC3B,VCAN,ARG1,LCN2,BPI,HSPH1,TCN1,PLTP,LTF,VEGFC,HP,TNIK,CRISP3,OLFML2A,C1RL,ALOX15B,RNASE1,DEFA4,ELANE,FGF9,GP6,RPLP0,PLEKHA1,RAB13,TGFBR3,CD1C,IQCB1,ST3GAL6,ORM2,TNFSF13,XCL1,MPO,CLIC4,CYBRD1,RPS3A,ITGA2B,EGF,SERPINB2,PRKACB,PROS1,HINT1,FAM3B,MMP9,CTSD,CAMP,PGLYRP1,FUT8,NRG1,SIRPA,S100B,HTRA1,CYFIP1,SLC23…
GO:CC	mitochondrial envelope	GO:0005740	FALSE	8.419036824425789e-21	20.07473759089511	840	6316	372	22149	MTARC1,HK2,MGST1,DAO,HAX1,RNF144B,NDUFS4,THEM4,CRAT,MAOA,SLC22A14,ALAS2,EPHA4,NDUFA4,MRPL13,CLU,GUF1,IFI27,MRPS28,IRGM,ABCD1,NDUFAF4,FECH,SLC25A40,NDUFB1,COX6A1,CYB5R3,ERAL1,NDUFA1,PLEC,UQCR11,TIMM8B,NDUFB4,MRPS18C,SURF1,PLSCR3,NDUFA2,COX7A2,PTRH2,TMEM11,NDUFB3,TMBIM6,COX7B,UQCR10,EXD2,UQCRQ,PNPLA8,SH3GLB1,TOMM20L,COX5A,UQCRFS1,NBR1,NDUFB6,IFI27L2,RDH13,CYP27A1,DEGS1,CLPX,SLC25A5,UCP2,TSPO,FGR,MR…
GO:CC	organelle inner membrane	GO:0019866	FALSE	1.3714323177002267e-20	19.862825620633	571	6316	273	22149	FAM209B,NDUFS4,THEM4,CRAT,SLC22A14,ALAS2,NDUFA4,MRPL13,CLU,GUF1,IFI27,MRPS28,FAM169A,NDUFAF4,FECH,SLC25A40,NDUFB1,COX6A1,CBX3,ERAL1,NDUFA1,UQCR11,TIMM8B,NDUFB4,MRPS18C,SURF1,PLSCR3,NDUFA2,COX7A2,TMEM11,NDUFB3,COX7B,UQCR10,UQCRQ,COX5A,UQCRFS1,TOR1AIP1,NDUFB6,RDH13,RNF13,CYP27A1,ZMPSTE24,CLPX,SLC25A5,UCP2,FGR,MRPL33,NDUFAF1,ND5,TIMM17B,COX8A,TMX4,ATP6,ATP5J,CHCHD1,LYN,LRRK2,IFFO1,GPD2,ROMO1,ARL6IP6…
GO:CC	mitochondrial membrane	GO:0031966	FALSE	1.8252512102373072e-20	19.738677354927056	790	6316	353	22149	MTARC1,HK2,MGST1,DAO,HAX1,RNF144B,NDUFS4,THEM4,CRAT,MAOA,SLC22A14,ALAS2,EPHA4,NDUFA4,MRPL13,CLU,GUF1,IFI27,MRPS28,IRGM,ABCD1,NDUFAF4,FECH,SLC25A40,NDUFB1,COX6A1,CYB5R3,ERAL1,NDUFA1,PLEC,UQCR11,TIMM8B,NDUFB4,MRPS18C,SURF1,PLSCR3,NDUFA2,COX7A2,PTRH2,TMEM11,NDUFB3,TMBIM6,COX7B,UQCR10,EXD2,UQCRQ,PNPLA8,SH3GLB1,TOMM20L,COX5A,UQCRFS1,NDUFB6,IFI27L2,RDH13,CYP27A1,DEGS1,CLPX,SLC25A5,UCP2,TSPO,FGR,MRPL33,…
GO:CC	organelle subcompartment	GO:0031984	FALSE	7.335297442618901e-20	19.134582271041012	1562	6316	617	22149	CKAP4,STX17,PLOD2,KLHL20,ERAP2,MGST1,NDST1,HLA-DPB1,SLC28A3,PNPLA2,ASPH,RNF175,SORT1,MS4A7,RAB13,NSG1,WIPI1,AGTRAP,CLIC4,HSD3B7,PROS1,FUT8,CYP1B1,TBXAS1,SEC31B,B4GALT5,MBOAT2,ATP8B4,IFI27,ATP7B,IRGM,TMT1B,RAB30,PTGS1,ABCD1,EIF5A2,NCEH1,TMCC2,MCTP1,CLTCL1,SRXN1,RYR1,TOR1A,PCSK7,HERPUD1,LPGAT1,COPB2,CDC42,CYB5R3,SEC13,ORMDL2,UFD1L,MMP24,AGPAT2,RNF139,RTN4,PIGS,COPB1,KPNB1,TMBIM6,COX4NB,VTI1A,SERP1,…
GO:CC	mitochondrial inner membrane	GO:0005743	FALSE	3.0023169559958243e-19	18.522543461002233	514	6316	248	22149	NDUFS4,THEM4,CRAT,SLC22A14,ALAS2,NDUFA4,MRPL13,CLU,GUF1,MRPS28,NDUFAF4,FECH,SLC25A40,NDUFB1,COX6A1,ERAL1,NDUFA1,UQCR11,TIMM8B,NDUFB4,MRPS18C,SURF1,PLSCR3,NDUFA2,COX7A2,TMEM11,NDUFB3,COX7B,UQCR10,UQCRQ,COX5A,UQCRFS1,NDUFB6,RDH13,CYP27A1,CLPX,SLC25A5,UCP2,FGR,MRPL33,NDUFAF1,ND5,TIMM17B,COX8A,ATP6,ATP5J,CHCHD1,LYN,LRRK2,GPD2,ROMO1,SLC25A3,SDHB,YME1L1,COX5B,SLC9B2,SLC25A45,SLC25A25,SLC27A1,COX3,SDHD,…
GO:CC	lysosome	GO:0005764	FALSE	6.200393483356297e-19	18.207580748852084	770	6316	341	22149	RETN,CKAP4,CEACAM8,KCNE1,CCT2,MGST1,CEACAM6,PLBD1,CHIT1,HLA-DPB1,VCAN,ARG1,BPI,TM6SF1,DEFA4,ELANE,SORT1,TRPM2,OCIAD2,NSG1,CD1C,ORM2,RRAGD,MPO,CYBRD1,EGF,CTSD,GIMAP5,AZU1,ABCA13,C3AR1,RNASE3,HPSE,IRGM,SLC7A5,ABCD1,DPP4,EPDR1,TMEM45B,CTSG,CD63,TFEB,GNB1,LAMP1,ACTR2,UBE2A,LAMTOR2,ATP6V1D,PIK3C3,CYB5R3,SEC13,SZT2,PRDX6,KIF5B,TMEM30A,GAA,NAPG,PRCP,GLA,KCNQ1,GNAI3,TOLLIP,DNAJC5,RAB2A,CREG1,SLCO4C1,ATP6…
GO:CC	lytic vacuole	GO:0000323	FALSE	6.200393483356297e-19	18.207580748852084	770	6316	341	22149	RETN,CKAP4,CEACAM8,KCNE1,CCT2,MGST1,CEACAM6,PLBD1,CHIT1,HLA-DPB1,VCAN,ARG1,BPI,TM6SF1,DEFA4,ELANE,SORT1,TRPM2,OCIAD2,NSG1,CD1C,ORM2,RRAGD,MPO,CYBRD1,EGF,CTSD,GIMAP5,AZU1,ABCA13,C3AR1,RNASE3,HPSE,IRGM,SLC7A5,ABCD1,DPP4,EPDR1,TMEM45B,CTSG,CD63,TFEB,GNB1,LAMP1,ACTR2,UBE2A,LAMTOR2,ATP6V1D,PIK3C3,CYB5R3,SEC13,SZT2,PRDX6,KIF5B,TMEM30A,GAA,NAPG,PRCP,GLA,KCNQ1,GNAI3,TOLLIP,DNAJC5,RAB2A,CREG1,SLCO4C1,ATP6…
GO:CC	endoplasmic reticulum	GO:0005783	FALSE	6.308144741412525e-19	18.20009835027091	2095	6316	788	22149	HK2,CKAP4,STX17,PLOD2,ERAP2,MGST1,HLA-DPB1,VCAN,SLC28A3,PNPLA2,HAX1,ASPH,RNF175,SORT1,RPLP0,NSG1,CD1C,AGTRAP,CES1,CLIC4,RPS3A,CRAT,HSD3B7,PROS1,SRPK1,FKBP9,GIMAP5,ZDHHC19,LTBP1,CYP1B1,TBXAS1,SEC31B,THBS1,DSC2,MBOAT2,CLU,ASGR2,RPL36A,IFI27,F5,IRGM,SERPING1,SLAMF7,TMT1B,PTGS1,RPS7,ABCD1,EEF1B2,EIF5A2,NCEH1,TMCC2,RRAS2,MCTP1,GIMAP2,GRINA,PSMF1,SRXN1,COL4A4,MYC,RYR1,TOR1A,HERPUD1,LPGAT1,COPB2,ZDHHC3,…
GO:CC	intracellular protein-containing complex	GO:0140535	FALSE	7.447870153252079e-19	18.12796790348451	946	6316	403	22149	DCAF16,KLHL20,CCT2,PRKAB2,RNF144B,ABAT,PRKACB,PRIM1,ANKRD9,HSP90AB1,MORF4L2,MED21,PSMF1,POP5,PSMD4,GSK3A,UBE2A,PSMB4,TAF12,CDK7,LAMTOR2,TXNL1,DR1,TADA3,POLR2F,ANAPC11,PSMB10,CCNH,CUL3,LMO7,FBXO44,CSDE1,POP7,APC,POLR2E,UBE2D3,PGGT1B,PSMC1,FBXL5,EIF4H,SHARPIN,EPC2,PRKAR1B,USP33,PSMD13,TRRAP,PSMA7,GTF2A1,UBQLN1,EP400,PSMD7,PCGF3,TNFAIP1,PSMD6,TSEN34,ZER1,CCDC47,FBXO42,RPPH1,MKLN1,HCFC1,BLOC1S3,CRCP,…
GO:CC	respiratory chain complex	GO:0098803	FALSE	1.1813319111143514e-17	16.927628064356423	102	6316	74	22149	NDUFS4,NDUFA4,NDUFB1,COX6A1,NDUFA1,NDUFB4,SURF1,NDUFA2,COX7A2,NDUFB3,COX7B,UQCR10,UQCRQ,COX5A,UQCRFS1,NDUFB6,ND5,COX8A,ATP6,ATP5J,SDHB,COX3,SDHD,COX6B1,COX2,ND4,NDUFB5,NDUFA8,NDUFS6,NDUFC1,COX7A2L,SDHC,NDUFS2,NDUFB11,COX1,UQCRB,NDUFC2,NDUFB10,ND2,CYTB,NDUFV2,NDUFB7,NDUFA9,SDHA,NDUFS7,NDUFA12,COX6B2,ND4L,WDR93,NDUFA11,ATP5MF,NDUFS5,COX4I1,NDUFB2,ATP5ME,COX7C,NDUFS3,ATP5MG,ATP5MJ,UQCRC1,CYC1,NDUFS8…
GO:CC	transferase complex	GO:1990234	FALSE	2.539262204493854e-17	16.5952924515149	910	6316	385	22149	DCAF16,KLHL20,IGF1R,PRKAB2,RNF144B,CDK5R1,ABAT,PRKACB,PRIM1,ANKRD9,F13A1,MORF4L2,MED21,UBE2A,TAF12,CDK7,DR1,PIK3C3,TADA3,ORMDL2,POLR2F,ANAPC11,CCNH,CHUK,CUL3,LMO7,FBXO44,PIGS,CBX5,POLR2E,UBE2D3,PGGT1B,FBXL5,SHARPIN,EPC2,PRKAR1B,USP33,TRRAP,GTF2A1,EP400,PCGF3,TGFBR1,VAC14,TNFAIP1,CDKN2D,SENP3,ZER1,FBXO42,MED13,MAP3K5,MKLN1,RB1,HCFC1,MEN1,CRCP,PIGU,MED1,DAD1,ENY2,FBXL22,PDCD6,ING3,SUZ12,TBPL1,PIK3C…
GO:CC	Golgi apparatus	GO:0005794	FALSE	3.787669699499517e-17	16.421627900296844	1659	6316	637	22149	ITM2A,TPST1,KLHL20,NDST1,FZD5,HLA-DPB1,VCAN,RNF175,DEFA4,SORT1,MS4A7,RAB13,CHST13,OCIAD2,NSG1,WIPI1,GALNT11,CD1C,ST3GAL6,AGTRAP,FGD4,PROS1,FUT8,ZDHHC19,TLR2,B4GALT5,NMT2,SLPI,CLU,ATP8B4,HIP1,ATP7B,IRGM,PLIN3,SGCE,RAB30,PTGS1,MPHOSPH9,F2RL1,DOCK4,RAB36,TMEM45B,RRAS2,CLTCL1,GASK1B,GRINA,TREML1,PLAGL1,B3GALT4,DYM,PCSK7,SRCAP,RGS19,COPB2,ZDHHC3,ATP6V1D,CDC42,SCYL2,CD3E,MMP24,MINK1,MAPRE1,C6ORF89,CUL3…
GO:CC	endosome	GO:0005768	FALSE	3.9837520268167903e-17	16.399707702561795	1083	6316	444	22149	FZD5,HLA-DPB1,LTF,TNIK,SORT1,RAB13,OCIAD2,NSG1,WIPI1,CD1C,CTSD,GIMAP5,KIAA0319,EPHA4,ATP7B,IRGM,SPHK1,PLIN3,RASGEF1B,F2RL1,SIAH2,TMEM45B,CD8B,MCTP1,CLTCL1,CCR5,CD63,NIPA2,LAMP1,UBE2A,LAMTOR2,ARPC2,ATP6V1D,PIK3C3,SCYL2,SLC34A1,ARHGAP1,TMEM30A,VTI1A,UBE2D3,PLEKHA3,AP1G2,EPN1,TGOLN2,SNX13,PRKAR1B,ARHGAP26,KCNQ1,TOLLIP,SLA,TSG101,TGFBR1,VAC14,PICALM,TNFAIP1,CREG1,ATP6V0E1,NBR1,HGS,PTPN23,HSD17B6,RNF1…
GO:CC	large ribosomal subunit	GO:0015934	FALSE	6.218113187719937e-17	16.206341376799937	114	6316	79	22149	RPL9,RPLP0,MRPL13,RPL36A,RPL26L1,MRPL33,MRPL38,RPL10L,RPL10,RPL28,RPL13A,MRPL28,NSUN3,RPL13,RPL3,RPL27A,Q6P4E4,MRPL20,NSUN4,MRPL19,MRPL22,RPL23,RBM3,RPL34,MRPL17,NHP2L1,RPL26,RPL31,MRPL3,RPL7,MRPL40,MRPL52,RPLP1,RPL41,MRPL27,MRPL14,MRPL48,RPL35,RPL30,MRPL12,MRPL51,RPL12,RPL11,RPL29,GADD45GIP1,RPL36AL,MRPL57,MRPL11,MRPS18A,RPL18A,RPL8,RPL18,RPL37,RPL6,MRPL54,MRPL41,MRPL55,MRPL2,RPL19,MRPL21,RPL36,…
GO:CC	ficolin-1-rich granule	GO:0101002	FALSE	2.49866774237128e-16	15.602291489871233	184	6316	110	22149	TIMP2,TRPM2,MMP9,CTSD,SIRPA,MAPK14,HSP90AB1,CR1,TNFAIP6,HK3,LAMP1,ACTR2,OSTF1,DIAPH1,COPB1,KPNB1,GAA,PRCP,ITGB2,PSMD13,PGM2,SRP14,PSMD7,PSMD6,ARPC5,CD58,CD300A,ARL8A,IMPDH1,DYNLT1,ALOX5,MVP,ADAM8,GNS,ATP6AP2,ATP6V0C,GUSB,PSMD12,PSMB1,DSC1,GMFG,COTL1,HSPA1A,DERA,CALML5,CAB39,YPEL5,HSPA6,HMGB1,PDAP1,PGM1,PLEKHO2,DOK3,LAMP2,HUWE1,GSTP1,ACTR1B,MAPK1,GYG1,CLEC4D,ATP6V0A1,ASAH1,QPCT,GLB1,TBC1D10C,MNDA,…
GO:CC	vacuolar membrane	GO:0005774	FALSE	2.753076579188983e-16	15.560181708164734	498	6316	234	22149	CKAP4,STX17,CEACAM8,MGST1,CEACAM6,HLA-DPB1,TM6SF1,SORT1,TRPM2,WIPI1,RRAGD,CYBRD1,EGF,CTSD,GIMAP5,AZU1,ABCA13,C3AR1,HPSE,IRGM,SLC7A5,ABCD1,DPP4,TMEM45B,CD63,TFEB,GNB1,LAMP1,LAMTOR2,ATP6V1D,YWHAB,SEC13,SZT2,KIF5B,TMEM30A,GAA,NAPG,PRCP,SH3GLB1,GNAI3,DNAJC5,VAC14,RAB2A,SLCO4C1,ATP6V0E1,RHEB,OSTM1,RNF13,CHMP2A,VPS13B,GRN,TAB2,FNIP1,RAP1B,ATP6AP1,TMEM199,ARL8A,TMEM59,WDR59,RAB18,CHMP3,STK11IP,NFAM1,HPS…
GO:CC	cytosolic ribosome	GO:0022626	FALSE	7.813809662997318e-16	15.107137171984634	115	6316	78	22149	RPL9,RPLP0,RPS3A,RPS27L,RPL36A,RPS7,RPL26L1,PELO,RPL10L,RPL10,RPL28,RPL13A,ETF1,RNF10,RPL13,RPL3,RPL27A,Q6P4E4,USP10,RPL23,METAP1,RPL34,NHP2L1,RPL26,RPL31,EIF2AK4,DHX29,RPL7,RPLP1,RPL41,FAU,RPS14,RPL35,RPL30,RPS27,RPL12,RPS20,RPL11,RPL29,RPL36AL,RPS28,RPS29,RPSA,RPS3,RPS5,RPS2,RPL18A,RPL8,RPL18,RPL37,RPS21,RNF25,RPL6,RPS11,RPS6,RPL19,RPL36,RPL24,RPS16,RPS15,RPL35A,RPL32,RPLP2,RPS19,RPS23,RPS9,RAC…
GO:CC	nuclear outer membrane-endoplasmic reticulum membrane network	GO:0042175	FALSE	1.060093653058944e-14	13.974655765669146	1258	6316	493	22149	CKAP4,STX17,PLOD2,ERAP2,MGST1,XPO1,HLA-DPB1,SLC28A3,PNPLA2,ASPH,RNF175,SORT1,NSG1,AGTRAP,CLIC4,HSD3B7,PROS1,CYP1B1,TBXAS1,SEC31B,MBOAT2,IFI27,IRGM,TMT1B,PTGS1,ABCD1,EIF5A2,NCEH1,TMCC2,MCTP1,SRXN1,RYR1,TOR1A,HERPUD1,LPGAT1,COPB2,CDC42,CYB5R3,SEC13,ORMDL2,UFD1L,AGPAT2,RNF139,RTN4,PIGS,COPB1,TMBIM6,COX4NB,VTI1A,SERP1,MGST2,PNPLA8,SGMS1,EDEM1,TOR1AIP2,REEP5,SGPL1,GNAI3,RAB2A,CNIH4,CCDC47,RHEB,RNF13,T…
GO:CC	endoplasmic reticulum subcompartment	GO:0098827	FALSE	1.4919331420393918e-14	13.82625063845447	1239	6316	486	22149	CKAP4,STX17,PLOD2,ERAP2,MGST1,HLA-DPB1,SLC28A3,PNPLA2,ASPH,RNF175,SORT1,NSG1,AGTRAP,CLIC4,HSD3B7,PROS1,CYP1B1,TBXAS1,SEC31B,MBOAT2,IFI27,IRGM,TMT1B,PTGS1,ABCD1,EIF5A2,NCEH1,TMCC2,MCTP1,SRXN1,RYR1,TOR1A,HERPUD1,LPGAT1,COPB2,CDC42,CYB5R3,SEC13,ORMDL2,UFD1L,AGPAT2,RNF139,RTN4,PIGS,COPB1,KPNB1,TMBIM6,COX4NB,VTI1A,SERP1,MGST2,PNPLA8,SGMS1,EDEM1,TOR1AIP2,REEP5,SGPL1,GNAI3,RAB2A,CNIH4,CCDC47,RHEB,RNF13,…
GO:CC	endoplasmic reticulum membrane	GO:0005789	FALSE	2.498948669902073e-14	13.602242664484688	1233	6316	483	22149	CKAP4,STX17,PLOD2,ERAP2,MGST1,HLA-DPB1,SLC28A3,PNPLA2,ASPH,RNF175,SORT1,NSG1,AGTRAP,CLIC4,HSD3B7,PROS1,CYP1B1,TBXAS1,SEC31B,MBOAT2,IFI27,IRGM,TMT1B,PTGS1,ABCD1,EIF5A2,NCEH1,TMCC2,MCTP1,SRXN1,RYR1,TOR1A,HERPUD1,LPGAT1,COPB2,CDC42,CYB5R3,SEC13,ORMDL2,UFD1L,AGPAT2,RNF139,RTN4,PIGS,COPB1,TMBIM6,COX4NB,VTI1A,SERP1,MGST2,PNPLA8,SGMS1,EDEM1,TOR1AIP2,REEP5,SGPL1,GNAI3,RAB2A,CNIH4,CCDC47,RHEB,RNF13,TMEM20…
GO:CC	membrane protein complex	GO:0098796	FALSE	4.230252233289067e-14	13.373633736582475	1393	6316	535	22149	TRAV16,CACNB2,TRAV5,STX17,CD3G,KCNE1,IGF1R,HLA-DPB1,TRGC2,KCNA3,ASPH,TRGV9,NDUFS4,TRGV5,PGM5,TGFBR3,TRAV12-2,CD8A,CLIC4,ITGA2B,TRAV12-3,SKAP1,RHCE,TLR2,SEC31B,ITGB3,GP1BA,NDUFA4,TRAV13-2,CD3D,TRAV13-1,TRDV2,SLC7A5,IL13RA1,SGCE,AQP1,ITGB5,CD8B,GP1BB,CLTCL1,TRAV20,TRAV22,TRDV3,RYR1,GNB1,NDUFB1,CALM2,COX6A1,COPB2,LAMTOR2,ATP6V1D,PIK3C3,SEC13,OLFM2,UFD1L,NDUFA1,CD3E,NDUFB4,CHUK,RNF139,PIGS,NDUFA2,COP…
GO:CC	extracellular region	GO:0005576	FALSE	4.708949125361981e-14	13.327076001571275	4258	6316	1434	22149	GZMK,RETN,MMP8,TIMP2,CKAP4,OLFM4,IL7R,HPR,CEACAM8,PLOD2,FKBP5,PTX3,CCT2,ERAP2,DAO,CEACAM6,PLBD1,CHIT1,CLEC3B,VCAN,ARG1,SPINK2,S100A12,LCN2,BPI,HSPH1,TCN1,PLTP,LTF,VEGFC,HP,TNIK,CRISP3,OLFML2A,C1RL,ALOX15B,RNASE1,DEFA4,ELANE,FGF9,GP6,RPLP0,PLEKHA1,RAB13,TGFBR3,PRLH,CD1C,IQCB1,ST3GAL6,CD8A,ORM2,TNFSF13,XCL1,CD163,MPO,CLIC4,CYBRD1,RPS3A,ITGA2B,EGF,SERPINB2,PRKACB,PROS1,HINT1,FAM3B,MMP9,CTSD,CAMP,PGL…
GO:CC	primary lysosome	GO:0005766	FALSE	8.822437789384991e-14	13.054411395345106	155	6316	93	22149	RETN,CKAP4,CEACAM8,CCT2,MGST1,CEACAM6,ARG1,BPI,DEFA4,ELANE,ORM2,MPO,AZU1,ABCA13,C3AR1,RNASE3,CTSG,CD63,LAMP1,ACTR2,CYB5R3,PRDX6,TMEM30A,GAA,PRCP,GLA,TOLLIP,DNAJC5,CREG1,SLCO4C1,GRN,RAP1B,ARL8A,IMPDH1,STK11IP,NFAM1,GNS,TXNDC5,BRI3,NPC2,ATP6V0C,GUSB,CAP1,RAB37,GLIPR1,ARSA,PYCARD,HEBP2,DNAJC3,GCA,SURF4,TOM1,MANBA,LAMP2,MAPK1,SDCBP,MAGT1,GLB1,MNDA,PSMD1,C6ORF120,STX3,FUCA1,VCP,STX7,NDUFC2,FPR1,CMTM6,…
GO:CC	azurophil granule	GO:0042582	FALSE	8.822437789384991e-14	13.054411395345106	155	6316	93	22149	RETN,CKAP4,CEACAM8,CCT2,MGST1,CEACAM6,ARG1,BPI,DEFA4,ELANE,ORM2,MPO,AZU1,ABCA13,C3AR1,RNASE3,CTSG,CD63,LAMP1,ACTR2,CYB5R3,PRDX6,TMEM30A,GAA,PRCP,GLA,TOLLIP,DNAJC5,CREG1,SLCO4C1,GRN,RAP1B,ARL8A,IMPDH1,STK11IP,NFAM1,GNS,TXNDC5,BRI3,NPC2,ATP6V0C,GUSB,CAP1,RAB37,GLIPR1,ARSA,PYCARD,HEBP2,DNAJC3,GCA,SURF4,TOM1,MANBA,LAMP2,MAPK1,SDCBP,MAGT1,GLB1,MNDA,PSMD1,C6ORF120,STX3,FUCA1,VCP,STX7,NDUFC2,FPR1,CMTM6,…
GO:CC	nuclear body	GO:0016604	FALSE	9.957121139273563e-14	13.001866209172023	894	6316	366	22149	PYHIN1,KLHL20,XPO1,GADD45A,MAML1,SNRNP40,SRPK1,DDX17,THOC1,MAPK14,SATB1,C12ORF57,ZNF473,ABRAXAS1,TREML1,PLAGL1,TRIP12,NDUFB1,WAC,ELF4,SRCAP,FLI1,SLC34A1,TP53,U2AF1,SAFB2,CBX5,SMNDC1,ZNF350,THAP1,RP2,EPAS1,SLU7,TCF7,YTHDC1,SAP130,TOLLIP,EP400,PRPF18,TERF2,UBASH3A,DAZAP2,SP3,NBR1,STK19,TRIM41,PTPN23,RBM8A,SCARNA22,WBP4,PRPF8,MKNK2,RB1,CDC14A,CBX1,DACH1,RAPH1,CLK3,SF3A1,POU6F1,SP100,NR3C1,SYF2,SUZ12…
GO:CC	cytosolic large ribosomal subunit	GO:0022625	FALSE	1.0263400198991274e-13	12.988708736395385	55	6316	45	22149	RPL9,RPLP0,RPL36A,RPL26L1,RPL10L,RPL10,RPL28,RPL13A,RPL13,RPL3,RPL27A,Q6P4E4,RPL23,RPL34,NHP2L1,RPL26,RPL31,RPL7,RPLP1,RPL41,RPL35,RPL30,RPL12,RPL11,RPL29,RPL36AL,RPL18A,RPL8,RPL18,RPL37,RPL6,RPL19,RPL36,RPL24,RPL35A,RPL32,RPLP2,RPL21,RPL38,RPL27,RPL39,RPL15,RPL10A,RPL23A,RPL7A
GO:CC	specific granule	GO:0042581	FALSE	1.3203417866522793e-13	12.87931363179175	158	6316	94	22149	RETN,MMP8,TIMP2,CKAP4,OLFM4,CEACAM8,PTX3,CHIT1,ARG1,LCN2,BPI,TCN1,LTF,HP,CRISP3,DEFA4,ELANE,TRPM2,ORM2,CLEC5A,CTSD,CAMP,PGLYRP1,CYFIP1,FOLR3,OLR1,SLPI,ATP8B4,C3AR1,HPSE,MCEMP1,OSCAR,CD177,LAMTOR2,ATP6V1D,SPTAN1,AGPAT2,TMEM30A,KPNB1,STXBP3,ITGB2,TOLLIP,DNAJC5,SLCO4C1,DEGS1,RAP1A,TMEM63A,ADAM8,MOSPD2,STX4,RAB37,LAMTOR3,STK10,B2M,ITGAM,RAB27A,TOM1,ACAA1,CYBA,CXCL1,QSOX1,LAIR1,GHDC,CFP,CLEC4D,CD36,QP…
GO:CC	cell junction	GO:0030054	FALSE	1.708257752885732e-13	12.767446599565995	2401	6316	856	22149	CACNB2,RPL9,TSPAN4,DAO,FZD5,SIPA1L2,VCAN,EVL,DLGAP3,KCNA3,TNIK,TNS2,ALOX15B,CDK5R1,SORT1,RPLP0,PGM5,RAB13,ADORA3,NSG1,CLIC4,ABCC2,RPS3A,ITGA2B,SKAP1,SYP,NRG1,EPHA4,CYFIP1,MAPK14,DSC2,ITGB3,CLU,S1PR3,HIP1,SPHK1,KIF21A,MPP1,LRFN1,ABTB3,RPS7,DOCK4,DPP4,ITGB5,NTNG2,SH3BP1,PTPRK,RRAS2,AFAP1,MCTP1,DNAJC6,TOR1A,NACC1,GNB1,DYTN,LAMP1,ACTR2,GSK3A,CNKSR1,HAPLN2,CEP68,ACTR3,CTBP2,CALM2,ARPC2,ARPC3,ATP6V1D,L…
GO:CC	lysosomal membrane	GO:0005765	FALSE	2.9119299521543957e-13	12.535819076391526	451	6316	208	22149	CKAP4,CEACAM8,MGST1,CEACAM6,HLA-DPB1,TM6SF1,SORT1,TRPM2,RRAGD,CYBRD1,EGF,CTSD,GIMAP5,AZU1,ABCA13,C3AR1,HPSE,IRGM,SLC7A5,ABCD1,DPP4,TMEM45B,CD63,TFEB,GNB1,LAMP1,LAMTOR2,ATP6V1D,SEC13,SZT2,KIF5B,TMEM30A,GAA,NAPG,PRCP,GNAI3,DNAJC5,RAB2A,SLCO4C1,ATP6V0E1,RHEB,OSTM1,RNF13,CHMP2A,VPS13B,GRN,TAB2,FNIP1,RAP1B,ATP6AP1,ARL8A,TMEM59,WDR59,CHMP3,STK11IP,NFAM1,HPS6,LMBRD1,GDAP2,TMEM63A,ABCC10,ATP6V1C1,RAB7A,C…
GO:CC	lytic vacuole membrane	GO:0098852	FALSE	2.9119299521543957e-13	12.535819076391526	451	6316	208	22149	CKAP4,CEACAM8,MGST1,CEACAM6,HLA-DPB1,TM6SF1,SORT1,TRPM2,RRAGD,CYBRD1,EGF,CTSD,GIMAP5,AZU1,ABCA13,C3AR1,HPSE,IRGM,SLC7A5,ABCD1,DPP4,TMEM45B,CD63,TFEB,GNB1,LAMP1,LAMTOR2,ATP6V1D,SEC13,SZT2,KIF5B,TMEM30A,GAA,NAPG,PRCP,GNAI3,DNAJC5,RAB2A,SLCO4C1,ATP6V0E1,RHEB,OSTM1,RNF13,CHMP2A,VPS13B,GRN,TAB2,FNIP1,RAP1B,ATP6AP1,ARL8A,TMEM59,WDR59,CHMP3,STK11IP,NFAM1,HPS6,LMBRD1,GDAP2,TMEM63A,ABCC10,ATP6V1C1,RAB7A,C…
GO:CC	oxidoreductase complex	GO:1990204	FALSE	2.528316505640418e-12	11.597168560117083	147	6316	87	22149	MTARC1,NDUFS4,NDUFA4,NDUFB1,COX6A1,CYB5R3,GMPR2,NDUFA1,NDUFB4,NDUFA2,NDUFB3,COX7B,UQCR10,UQCRQ,COX5A,UQCRFS1,NDUFB6,ND5,COX8A,NCF2,AMT,GPD2,SDHB,KAT2A,COX3,SDHD,COX6B1,CYBA,COX2,HSD17B8,ND4,RRM2,IDH3A,NDUFB5,NDUFA8,NDUFS6,NOXA1,NDUFC1,SDHC,NDUFS2,NDUFB11,COX1,UQCRB,PDK1,HADHB,NDUFC2,LDHB,NDUFB10,ND2,CYTB,CYBB,NDUFV2,NDUFB7,CAT,GCSH,NDUFA9,SDHA,NDUFS7,NDUFA12,COX6B2,RRM1,ND4L,WDR93,NDUFA11,HADHA,N…
GO:CC	endosome membrane	GO:0010008	FALSE	3.0937998376476274e-12	11.509507787668692	582	6316	252	22149	FZD5,HLA-DPB1,SORT1,RAB13,NSG1,WIPI1,CD1C,CTSD,GIMAP5,KIAA0319,EPHA4,IRGM,SPHK1,PLIN3,TMEM45B,CD8B,CD63,LAMP1,LAMTOR2,ATP6V1D,SCYL2,ARHGAP1,TMEM30A,VTI1A,UBE2D3,AP1G2,SNX13,ARHGAP26,TSG101,VAC14,ATP6V0E1,HGS,HSD17B6,RNF13,CHMP2A,ATP7A,ZMPSTE24,VPS13B,CLIP3,MKLN1,TAB2,ATP6AP1,ARL8A,TMEM59,PLEKHB2,CHMP3,TRAF6,HPS6,RAP1A,TMEM63A,RAB7A,CHMP1B,ATP6AP2,SNX10,ATP6V0C,TLR8,ZFYVE27,VPS18,SNX6,RAB21,RET,RA…
GO:CC	U2-type spliceosomal complex	GO:0005684	FALSE	3.3926851123983692e-12	11.46945644695492	94	6316	63	22149	SNRNP40,ZMAT2,ISY1,PRPF18,RBM8A,WBP4,LSM6,PRPF8,SF3A1,SYF2,SF3A2,MFAP1,LSM3,EIF4A3,SNRPN,BUD13,SNW1,CRNKL1,BUD31,SNRPG,SNRPE,CWC15,SF3B4,CDC40,PRPF39,SNRPB2,PRPF40A,BCAS2,PRPF40B,PPIL1,LUC7L,CCDC12,SF3A3,SF3B2,AQR,SNRNP200,XAB2,SNRNP70,DHX8,SF3B3,SNRPB,TXNL4A,CWC22,HTATSF1,U2AF2,SNIP1,NHP2L1,PRPF19,SMU1,PRPF38A,IK,LSM2,DHX15,SNRPD2,SF3B5,LSM7,YJU2,RBMX2,CWC25,SNRPC,LSM4,SART1,SNRPF
GO:CC	perinuclear region of cytoplasm	GO:0048471	FALSE	3.756878457977834e-12	11.425172854945501	746	6316	309	22149	CKAP4,OLFM4,KLHL20,FZD5,CDK5R1,SORT1,CLIC4,SHTN1,SYP,ZDHHC19,S100B,CYFIP1,HSP90AB1,AATK,CLU,INHBA,ASGR2,ATP7B,ABCD1,PSMF1,LAMP1,BNIP2,SRCAP,CDK7,TNFSF12,YWHAB,SLC34A1,PAFAH1B1,PDE7A,PLEC,ARHGAP1,PRDX6,KIF5B,APC,SYNC,VTI1A,ATN1,DOK1,FBXL5,EIF4H,MTMR14,USP33,EXOC6,TOLLIP,UBQLN1,PREX1,PICALM,KRT18,ATP7A,PLCG2,UPF1,ZDHHC20,ARFGEF1,TRAF6,CLIC1,ALOX5,AFTPH,OSBPL1A,MVP,RELT,RAP1A,HYAL2,CYB5R4,MOB4,ARF5,…
GO:CC	microtubule cytoskeleton	GO:0015630	FALSE	4.644617723045441e-12	11.33305002496505	1436	6316	539	22149	FAM110B,HK2,CCT2,HSPH1,TUBGCP5,NME7,GPR174,IQCB1,EML6,KIF3C,RRAGD,CLIC4,PRKACB,IFT56,SHTN1,TUBE1,MAPK14,CENPJ,GEN1,HECW2,NUAK1,KIF21A,MPP1,CEP78,MPHOSPH9,RPS7,G6PD,CLTCL1,CDCA8,CEP68,PSMB4,CALM2,DNHD1,DR1,ATP6V1D,CDC42,CBX3,SLC34A1,SPTAN1,TADA3,PAFAH1B1,DIAPH1,TP53,MAPRE1,RAD21,EIF3A,CUL3,PPP4R2,AAAS,GNAI2,HDAC3,KIF5B,APC,ROCK1,RAE1,KIF1C,OVGP1,PXN,RP2,SERP1,SPECC1,USP33,KIFC2,GNAI3,TSG101,MECP2,…
GO:CC	tertiary granule	GO:0070820	FALSE	7.0938398078812015e-12	11.149118622931844	163	6316	93	22149	MMP8,TIMP2,OLFM4,CEACAM8,PTX3,CHIT1,TCN1,LTF,HP,CRISP3,TRPM2,CLEC5A,MMP9,CTSD,CAMP,PGLYRP1,SIRPA,CYFIP1,FOLR3,OLR1,ATP8B4,CR1,MCEMP1,OSCAR,CD177,TNFAIP6,LAMP1,LAMTOR2,SPTAN1,DIAPH1,COPB1,GAA,PRCP,STXBP3,ITGB2,CD58,CD300A,ARL8A,TMEM63A,ADAM8,ATP6AP2,ATP6V0C,DSC1,GOLGA7,LAMTOR3,B2M,YPEL5,ITGAM,CYBA,CXCL1,PGM1,QSOX1,DOK3,LAMP2,LAIR1,CFP,CLEC4D,ATP6V0A1,ASAH1,QPCT,TBC1D10C,CNN2,ATAD3B,UBR4,TCIRG1,STX…
GO:CC	spliceosomal complex	GO:0005681	FALSE	1.0316065672221564e-11	10.98648590180042	210	6316	112	22149	SNRNP40,WAC,ZMAT2,U2AF1,USP39,SMNDC1,SLU7,HNRNPC,ISY1,PRPF18,RHEB,RBM8A,WBP4,UPF1,LSM6,PRPF8,SF3A1,SYF2,SF1,GPKOW,SF3A2,ARMC7,MFAP1,LSM3,SCNM1,EIF4A3,SNRPN,BUD13,SNW1,CRNKL1,SNRPA,HNRNPH3,BUD31,TSSC4,SNRPG,SNRPE,CWC15,SF3B4,ZCRB1,DDX39B,CDC40,HNRNPK,PPIL2,SRSF2,PRPF39,SNRPB2,PRPF40A,LGALS3,BCAS2,PRPF40B,IVNS1ABP,PPP1R8,PDCD7,PPIL1,CACTIN,LUC7L,CCDC12,SF3A3,HNRNPM,DHX38,CTNNBL1,DDX23,PNN,SF3B2,AQR…
GO:CC	cytoskeleton	GO:0005856	FALSE	3.600753163998441e-11	10.4436066490224	2474	6316	864	22149	FAM110B,HK2,CKAP4,KLHL20,CCT2,S100A12,EVL,NARF,HSPH1,CSRP3,HAX1,TNIK,PSTPIP2,TUBGCP5,ALOX15B,NME7,GPR174,PGM5,WIPI1,IQCB1,EML6,KIF3C,RRAGD,CLIC4,SH2B2,RSPH9,TRIB2,FGD4,PRKACB,IFT56,MYL9,TNNT1,HINT1,SHTN1,RHOH,TUBE1,MAPK14,ACTR6,CENPJ,GEN1,HECW2,PTPN4,CLU,CR1,HIP1,NUAK1,SGCE,KIF21A,MPP1,CEP78,MPHOSPH9,RPS7,G6PD,AFAP1,CLTCL1,CDCA8,TOR1A,ACTR2,CEP68,PSMB4,ACTR3,CALM2,DNHD1,ARPC2,DR1,ARPC3,ATP6V1D,CD…
GO:CC	nuclear envelope	GO:0005635	FALSE	7.292818427613853e-11	10.137104599115874	519	6316	225	22149	XPO1,NARF,HAX1,FAM209B,NPIPB3,SORT1,IFI27,AQP1,KPNA3,FAM169A,SCAI,MYC,TOR1A,BNIP2,CBX3,SEC13,PAFAH1B1,LMO7,RTN4,AAAS,CBX5,KPNB1,BROX,RAE1,MGST2,TOR1AIP2,TOR1AIP1,RNF13,RANBP3,CHMP2A,ZMPSTE24,CHMP3,HTATIP2,OSBPL8,CLIC1,ALOX5,MVP,SLC16A3,ENY2,CHMP1B,TMX4,SUMO1,XPO7,CLCC1,NUP210,STAU2,NUP160,C9ORF72,IFFO1,BICD2,ARL6IP6,VPS4B,CMTM3,SPAST,CHMP7,BANF1,ITPR3,TNKS,LBR,FXR1,XPO4,QSOX2,PAK1,SURF4,TM7SF2,TM…
GO:CC	focal adhesion	GO:0005925	FALSE	1.189623399967475e-10	9.924590501802173	426	6316	191	22149	RPL9,TSPAN4,EVL,TNS2,ALOX15B,RPLP0,PGM5,RPS3A,ITGA2B,CYFIP1,ITGB3,RPS7,DPP4,ITGB5,RRAS2,AFAP1,ACTR2,ACTR3,ARPC2,ARPC3,YWHAB,CDC42,HYOU1,PLEC,MAPRE1,LMO7,PTPN12,GIT2,PXN,USP33,ARHGAP26,ITGB2,PTPRC,HMGA1,ARPC5,VASP,PPP1R12A,GNA13,IQGAP1,JAK2,ATP6V0C,TPM4,CD46,VIM,RAB21,CAP1,RAB10,HSPA1A,CTNNB1,LAMTOR3,B2M,SNTB1,CD44,PALLD,MARCKS,PAK1,CD99L2,APBB1IP,ITGA3,YWHAZ,CD151,FES,LCP1,MAPK1,MPRIP,SDCBP,RPL13…
GO:CC	ficolin-1-rich granule lumen	GO:1904813	FALSE	1.4088232559728678e-10	9.85114348792002	124	6316	74	22149	TIMP2,MMP9,CTSD,MAPK14,HSP90AB1,TNFAIP6,HK3,ACTR2,OSTF1,KPNB1,PSMD13,PGM2,SRP14,PSMD7,PSMD6,ARPC5,IMPDH1,DYNLT1,ALOX5,MVP,GNS,GUSB,PSMD12,PSMB1,GMFG,COTL1,HSPA1A,DERA,CALML5,CAB39,YPEL5,HSPA6,HMGB1,PDAP1,PGM1,PLEKHO2,HUWE1,GSTP1,ACTR1B,MAPK1,GYG1,ASAH1,QPCT,GLB1,MNDA,ATG7,PSMD2,PYGL,VCP,IMPDH2,IDH1,CTSZ,PGAM1,PSMA5,ALDOC,CAT,XRCC6,CAPN1,APEH,PSMC3,PSMD3,FCN1,BIN2,CST3,GPI,PPIA,CTSH,COMMD9,PSMB7,E…
GO:CC	mitochondrial matrix	GO:0005759	FALSE	1.6694192029829267e-10	9.777434595206673	514	6316	222	22149	HAX1,ABAT,THEM4,PPM1K,ALAS2,MRPL13,FOXO3B,GUF1,AK3,MRPS28,PDK4,FECH,FASTKD5,ERAL1,TP53,MPST,MRPS18C,EXD2,UQCRFS1,GSR,CYP27A1,STYXL1,TRMT2B,CLPX,SLC25A5,MRPL33,NDUFAF1,NR3C1,AMT,CHCHD1,HSPA1L,FOXO3,SLIRP,LRRK2,ACOT13,D2HGDH,SDHB,METTL17,OGG1,SARDH,MRPL38,COX2,LRRC59,HSD17B8,DNAJA3,MTG1,GLRX2,IDH3A,PUS1,TRMT5,PPTC7,AK4,MTHFD2,GRPEL2,ISCU,GPX1,RPUSD3,NDUFS2,DECR1,GLYAT,ALDH5A1,LONP1,TRAP1,PYCR1,OAT,…
GO:CC	cell-substrate junction	GO:0030055	FALSE	1.8578042378627777e-10	9.731000050781086	436	6316	194	22149	RPL9,TSPAN4,EVL,TNS2,ALOX15B,RPLP0,PGM5,RPS3A,ITGA2B,CYFIP1,ITGB3,RPS7,DPP4,ITGB5,RRAS2,AFAP1,ACTR2,ACTR3,ARPC2,ARPC3,YWHAB,CDC42,HYOU1,PLEC,MAPRE1,LMO7,PTPN12,GIT2,PXN,USP33,ARHGAP26,ITGB2,PTPRC,HMGA1,ARPC5,EPPK1,VASP,PPP1R12A,GNA13,IQGAP1,JAK2,ATP6V0C,TPM4,CD46,VIM,RAB21,CAP1,RAB10,HSPA1A,CTNNB1,LAMTOR3,B2M,SNTB1,CD44,PALLD,MARCKS,PAK1,CD99L2,APBB1IP,ITGA3,YWHAZ,CD151,FES,LAMA3,LCP1,MAPK1,MPRIP…
GO:CC	secretory granule membrane	GO:0030667	FALSE	2.0242880573418808e-10	9.693727687082927	319	6316	151	22149	CKAP4,CEACAM8,MGST1,CEACAM6,LHFPL2,TRPM2,CLEC5A,ITGA2B,SIRPA,TLR2,OLR1,SELP,ITGB3,AZU1,ATP8B4,CR1,ABCA13,C3AR1,MCEMP1,CD177,CD63,LAMP1,LAMTOR2,ATP6V1D,DIAPH1,AGPAT2,COPB1,TMEM30A,GAA,PRCP,ITGB2,PTPRC,DNAJC5,CD58,SLCO4C1,CD300A,DEGS1,VPS13B,RAP1B,ARL8A,RAB18,NFAM1,RAP1A,TMEM63A,IQGAP1,RAB7A,ADAM8,ATP6AP2,BRI3,ATP6V0C,CD46,TYROBP,RAB10,MOSPD2,RAB37,DSC1,GLIPR1,LAMTOR3,LILRB3,EXOC3,ITPR3,STK10,CD44,…
GO:CC	Golgi membrane	GO:0000139	FALSE	2.422528783671698e-10	9.615731054105671	688	6316	282	22149	TPST1,NDST1,FZD5,HLA-DPB1,RNF175,CHST13,WIPI1,GALNT11,ST3GAL6,AGTRAP,PROS1,FUT8,ZDHHC19,B4GALT5,ATP7B,IRGM,RAB30,MPHOSPH9,RAB36,RRAS2,GASK1B,B3GALT4,PCSK7,COPB2,ZDHHC3,ATP6V1D,CDC42,C6ORF89,NAA60,COPB1,ROCK1,VTI1A,PCSK5,PLEKHA3,AP1G2,SH3GLB1,PDGFB,SGMS1,GALNT7,GNAI3,TMEM167A,VAC14,RAB2A,RHEB,COG7,PDCD10,VPS13B,GLIPR2,ZDHHC20,ARF4,ATP6AP1,SEC22B,TMEM59,RAB18,ARFGEF1,GALNT10,HYAL2,ATP6AP2,ATP6V0C,G…
GO:CC	centrosome	GO:0005813	FALSE	3.8637037781935216e-10	9.412996177398213	746	6316	301	22149	FAM110B,HK2,TUBGCP5,NME7,GPR174,IQCB1,RRAGD,CLIC4,PRKACB,IFT56,TUBE1,CENPJ,GEN1,MPP1,CEP78,MPHOSPH9,RPS7,G6PD,CEP68,CALM2,ATP6V1D,CDC42,PAFAH1B1,DIAPH1,TP53,MAPRE1,CUL3,PPP4R2,AAAS,GNAI2,KIF5B,APC,USP33,GNAI3,TSG101,MECP2,RILPL2,KRT18,TUBG2,DDHD2,CDC14A,LZTS2,CLIP1,PPP1R12A,TXNDC9,TMEM63A,NUMA1,SNX10,JTB,NDEL1,NR3C1,IL1RN,TCEA2,PKN2,TRIP4,SPAG9,FRY,HIPK1,CNTROB,BICD2,NEIL1,CCDC88B,HSPA1A,VPS4B,ST…
GO:CC	specific granule lumen	GO:0035580	FALSE	6.878315776952328e-10	9.162517890008644	61	6316	44	22149	RETN,MMP8,TIMP2,OLFM4,PTX3,CHIT1,ARG1,LCN2,BPI,TCN1,LTF,HP,CRISP3,DEFA4,ELANE,ORM2,CTSD,CAMP,PGLYRP1,CYFIP1,FOLR3,SLPI,HPSE,OSCAR,SPTAN1,KPNB1,TOLLIP,B2M,RAB27A,ACAA1,CXCL1,QSOX1,GHDC,CFP,QPCT,CNN2,CTSZ,FRK,NEU1,ORM1,NFKB1,PTPN6,PDXK,GSDMD
GO:CC	nuclear speck	GO:0016607	FALSE	7.195256034901691e-10	9.142953747583306	419	6316	186	22149	PYHIN1,GADD45A,MAML1,SNRNP40,SRPK1,DDX17,THOC1,MAPK14,C12ORF57,TREML1,TRIP12,NDUFB1,WAC,SLC34A1,U2AF1,SMNDC1,EPAS1,SLU7,YTHDC1,SAP130,EP400,PRPF18,UBASH3A,DAZAP2,STK19,RBM8A,WBP4,PRPF8,DACH1,CLK3,SF3A1,NR3C1,SYF2,SRSF4,SUMO1,THOC6,APBB1,EAPP,THOC7,DYRK1A,MORF4L1,RSRC1,ZNF217,HIPK1,SF3A2,HDAC4,RING1,FAM193B,HSPA1A,EHMT2,PLA2G6,SCNM1,OGG1,EIF4A3,CIR1,SNW1,CRNKL1,RBM4,SRPK2,CWC15,DNAJC11,POMP,CBX4,T…
GO:CC	coated vesicle	GO:0030135	FALSE	7.762755139605967e-10	9.109984112560673	318	6316	149	22149	STX17,CD3G,IL7R,FZD5,HLA-DPB1,HAX1,SORT1,RAB13,WIPI1,EGF,KIAA0319,SEC31B,CD3D,HIP1,F5,CLTCL1,DNAJC6,RGS19,COPB2,ATP6V1D,SCYL2,SEC13,COPB1,VTI1A,AP1G2,EPN1,TGOLN2,DNAJC5,PICALM,CNIH4,ATP7A,DDHD2,ATP6AP1,TMEM199,SEC22B,AFTPH,LMBRD1,ATP6V1C1,ATP6AP2,PDCD6,ATP6V0C,VPS18,LDLRAP1,CNIH,KDELR2,RAB35,DENND1A,SNX18,SEC23A,GGA2,B2M,VPS41,MCFD2,SAR1A,AP2B1,VAMP3,SURF4,RAB27A,ATP6V1E1,RAB5A,HLA-DRB5,FCHO2,SEC…
GO:CC	peptidase complex	GO:1905368	FALSE	1.0666851024569128e-9	8.971963770312772	130	6316	75	22149	CAPNS2,PSMF1,PSMD4,PSMB4,TAF12,TXNL1,TADA3,CRADD,PSMB10,PIGS,PSMC1,PSMD13,TRRAP,PSMA7,UBQLN1,PSMD7,PSMD6,F7,SEC11A,PIGU,ENY2,RAD23B,PSMB3,PSMD12,PSMA6,PSMB9,PSMB1,Q16594,KAT2A,TAF10,CAPN3,ADRM1,PSMA4,PIGT,PSMB8,USP14,PSME1,SPCS3,PSMD1,PSMD2,VCP,HSPB1,PLAUR,SHFM1,PRICKLE1,PSMA1,PSMA5,PSMB2,TAF6,USP22,UBQLN4,CASP2,PSMC4,CAPN1,SF3B3,PLAU,PSMC3,PSMD3,PSMD8,UBR1,PSMC5,FCN1,ATXN7L3,TADA1,PSMB6,SF3B5,PI…
GO:CC	microtubule organizing center	GO:0005815	FALSE	3.2992678318384875e-9	8.481582427356107	886	6316	344	22149	FAM110B,HK2,TUBGCP5,NME7,GPR174,IQCB1,RRAGD,CLIC4,PRKACB,IFT56,TUBE1,CENPJ,GEN1,MPP1,CEP78,MPHOSPH9,RPS7,G6PD,CEP68,PSMB4,CALM2,ATP6V1D,CDC42,PAFAH1B1,DIAPH1,TP53,MAPRE1,CUL3,PPP4R2,AAAS,GNAI2,KIF5B,APC,ROCK1,RP2,SPECC1,USP33,KIFC2,GNAI3,TSG101,MECP2,RILPL2,KRT18,TUBG2,PTPN23,DDHD2,CDC14A,LZTS2,CLIP1,PPP1R12A,TXNDC9,TMEM63A,NUMA1,SNX10,JTB,NDEL1,NR3C1,IL1RN,TCEA2,VIM,PKN2,TRIP4,SPAG9,FRY,HIPK1,CN…
GO:CC	respiratory chain complex I	GO:0045271	FALSE	3.364426641271405e-9	8.473088936714408	45	6316	35	22149	NDUFS4,NDUFB1,NDUFA1,NDUFB4,NDUFA2,NDUFB3,NDUFB6,ND5,ND4,NDUFB5,NDUFA8,NDUFS6,NDUFC1,NDUFS2,NDUFB11,NDUFC2,NDUFB10,ND2,NDUFV2,NDUFB7,NDUFA9,NDUFS7,NDUFA12,ND4L,WDR93,NDUFA11,NDUFS5,NDUFB2,NDUFS3,NDUFS8,NDUFV1,NDUFB9,NDUFAB1,MT-ND3,MT-ND1
GO:CC	NADH dehydrogenase complex	GO:0030964	FALSE	3.364426641271405e-9	8.473088936714408	45	6316	35	22149	NDUFS4,NDUFB1,NDUFA1,NDUFB4,NDUFA2,NDUFB3,NDUFB6,ND5,ND4,NDUFB5,NDUFA8,NDUFS6,NDUFC1,NDUFS2,NDUFB11,NDUFC2,NDUFB10,ND2,NDUFV2,NDUFB7,NDUFA9,NDUFS7,NDUFA12,ND4L,WDR93,NDUFA11,NDUFS5,NDUFB2,NDUFS3,NDUFS8,NDUFV1,NDUFB9,NDUFAB1,MT-ND3,MT-ND1
GO:CC	endocytic vesicle	GO:0030139	FALSE	4.161538278679051e-9	8.380746106283315	351	6316	159	22149	CD3G,IL7R,FZD5,HLA-DPB1,HSPH1,LTF,HP,ELANE,RAB13,CLEC4E,CD163,MPO,EGF,MARCO,PGLYRP1,KIAA0319,TLR2,CD3D,IRGM,SPHK1,DPP4,ITGB5,CLTCL1,LAMP1,CDC42,HYOU1,PIK3C3,KIF5B,TGOLN2,STXBP3,PICALM,ATP6V0E1,HGS,ATP7A,SEC22B,LMBRD1,CAMK2G,HYAL2,RAB7A,ADAM8,ATP6V0C,NCF2,VIM,LYN,LDLRAP1,RAB10,EHD1,STX4,ATG12,HCLS1,RAB35,PLD4,TLR9,B2M,RAPGEF2,MTMR4,UBC,AP2B1,VAMP3,RAB5A,TLR1,CYBA,HLA-DRB5,RAB34,SYK,WNT7B,RAB11B,AT…
GO:CC	anchoring junction	GO:0070161	FALSE	1.1770051432576138e-8	7.9292216393795725	912	6316	350	22149	RPL9,TSPAN4,FZD5,EVL,TNS2,ALOX15B,RPLP0,PGM5,RAB13,CLIC4,ABCC2,RPS3A,ITGA2B,SKAP1,EPHA4,CYFIP1,DSC2,ITGB3,MPP1,RPS7,DPP4,ITGB5,SH3BP1,PTPRK,RRAS2,AFAP1,ACTR2,CNKSR1,ACTR3,ARPC2,ARPC3,LSR,YWHAB,CDC42,HYOU1,PLEC,CD3E,MAPRE1,LMO7,RTN4,PTPN12,GIT2,APC,TBC1D2,MPP7,ATN1,PXN,USP33,ARHGAP26,ITGB2,PTPRC,HMGA1,TGFBR1,ARPC5,KRT18,EPPK1,AQP3,PLCG1,FSCN1,RAP1B,VEGFA,ITK,VASP,PPP1R12A,GNA13,RAP1A,IQGAP1,ABI2,J…
GO:CC	synapse	GO:0045202	FALSE	2.498098758194367e-8	7.602390396509902	1665	6316	591	22149	CACNB2,DAO,FZD5,SIPA1L2,VCAN,DLGAP3,KCNA3,TNIK,CDK5R1,SORT1,RPLP0,RAB13,ADORA3,NSG1,RPS3A,SYP,NRG1,EPHA4,CYFIP1,MAPK14,ITGB3,CLU,S1PR3,HIP1,SPHK1,KIF21A,LRFN1,ABTB3,RPS7,DOCK4,NTNG2,MCTP1,DNAJC6,TOR1A,GNB1,DYTN,LAMP1,GSK3A,HAPLN2,CTBP2,CALM2,ARPC2,ATP6V1D,CDC42,PIK3C3,OLFM2,PAFAH1B1,KCTD12,MPST,CD3E,MINK1,IGSF9B,EIF3A,CUL3,HOMER3,RTN4,GNAI2,KIF5B,EIF4EBP2,GIT2,SYNC,ROCK1,VTI1A,CASP3,IGSF8,AP1G2,S…
GO:CC	endopeptidase complex	GO:1905369	FALSE	2.9524463018759827e-8	7.529817992448071	101	6316	60	22149	CAPNS2,PSMF1,PSMD4,PSMB4,TXNL1,CRADD,PSMB10,PIGS,PSMC1,PSMD13,PSMA7,UBQLN1,PSMD7,PSMD6,SEC11A,PIGU,RAD23B,PSMB3,PSMD12,PSMA6,PSMB9,PSMB1,CAPN3,ADRM1,PSMA4,PIGT,PSMB8,USP14,PSME1,SPCS3,PSMD1,PSMD2,VCP,HSPB1,PLAUR,SHFM1,PRICKLE1,PSMA1,PSMA5,PSMB2,UBQLN4,CASP2,PSMC4,CAPN1,PLAU,PSMC3,PSMD3,PSMD8,UBR1,PSMC5,FCN1,PSMB6,PIDD1,DNAJB2,GPAA1,PSMB5,CAPNS1,ZFAND2B,PSMB7,ZFAND2A
GO:CC	spindle	GO:0005819	FALSE	3.691875933610053e-8	7.432752901972746	438	6316	187	22149	TUBGCP5,NME7,IQCB1,MAPK14,HECW2,CLTCL1,CDCA8,CALM2,DR1,CDC42,CBX3,SLC34A1,TADA3,PAFAH1B1,DIAPH1,MAPRE1,RAD21,CUL3,AAAS,HDAC3,RAE1,KIFC2,TUBG2,CHMP2A,RB1,ARL8A,SLC25A5,CDC14A,CBX1,CHMP3,DYNLT1,SEPT6,CHMP1B,NUMA1,JTB,NDEL1,NR3C1,NEIL2,MICAL3,KNTC1,FRY,EPB41,ACOT13,VPS4B,UBXN2B,SPAST,TUBGCP4,CHMP7,CTNNB1,DDX11,KAT2A,TNKS,YPEL5,EML3,CDC25B,NIN,TRAT1,CHAMP1,ARL8B,FBF1,LSM14A,KATNA1,CEP63,PLK1,EMD,CEP1…
GO:CC	proteasome complex	GO:0000502	FALSE	9.75570950519999e-8	7.01074114010974	67	6316	44	22149	PSMF1,PSMD4,PSMB4,TXNL1,PSMB10,PSMC1,PSMD13,PSMA7,UBQLN1,PSMD7,PSMD6,RAD23B,PSMB3,PSMD12,PSMA6,PSMB9,PSMB1,ADRM1,PSMA4,PSMB8,USP14,PSME1,PSMD1,PSMD2,VCP,HSPB1,SHFM1,PRICKLE1,PSMA1,PSMA5,PSMB2,UBQLN4,PSMC4,PSMC3,PSMD3,PSMD8,UBR1,PSMC5,PSMB6,DNAJB2,PSMB5,ZFAND2B,PSMB7,ZFAND2A
GO:CC	catalytic step 2 spliceosome	GO:0071013	FALSE	2.6972266932423167e-7	6.569082550956513	91	6316	54	22149	SNRNP40,U2AF1,SLU7,HNRNPC,ISY1,RBM8A,PRPF8,SF3A1,SYF2,SF3A2,LSM3,EIF4A3,SNRPN,SNW1,CRNKL1,BUD31,SNRPG,SNRPE,CWC15,CDC40,HNRNPK,PPIL2,SNRPB2,BCAS2,PPIL1,CACTIN,SF3A3,HNRNPM,DHX38,DDX23,PNN,SF3B2,AQR,SRRM1,SNRNP200,XAB2,HNRNPU,DHX8,HNRNPR,SF3B3,SNRPB,CWC22,DHX35,DDX41,PRPF19,PPIL3,LSM2,HNRNPA3,SNRPD2,LSM7,RALY,WDR83,SART1,SNRPF
GO:CC	transcription regulator complex	GO:0005667	TRUE	3.085423616672053e-7	6.510685200592473	523	6316	213	22149	MAFG,ATF7IP2,HAX1,ELANE,CEBPA,TCF4,CEBPE,GFI1B,MED21,JDP2,MYC,STAT4,TAF12,CTBP2,CDK7,MBD2,DR1,YY1,CBX3,TADA3,TP53,MTA3,CCNH,MIER1,JAZF1,CBX5,HDAC3,ZNF350,EPAS1,TCF7,TRRAP,HMGA1,GTF2A1,RARG,CREG1,SP3,NFIL3,RB1,MEN1,RBPJ,DACH1,HYAL2,MED1,NPAS2,ENY2,TBPL1,TRIM28,STAT5B,HDAC2,RCOR1,NR6A1,BCL9L,FOXO3,SOX8,RXRA,Q16594,PYGO2,HCLS1,LMO2,HDAC4,MAX,ING2,CTNNB1,NFYC,KAT2A,TAF10,CTBP1,CTNNBIP1,NR1H4,MED11,TA…
GO:CC	autophagosome	GO:0005776	FALSE	4.173525198472123e-7	6.379496960017211	118	6316	65	22149	STX17,WIPI1,IRGM,LAMP1,PIK3C3,VTI1A,SH3GLB1,UBQLN1,RAB2A,NBR1,CHMP2A,NCOA4,RAB18,CHMP3,RAB7A,CHMP1B,ATP6AP2,TAX1BP1,VPS18,LRRK2,C9ORF72,ATG12,RAB2B,PIP4K2C,CHMP7,ATG9B,ULK3,ATP13A2,GABARAPL2,RB1CC1,ATG5,LAMP2,CHMP1A,MAP1LC3B,NRBF2,HAP1,CHMP2B,CALCOCO2,GABARAPL1,UBQLN2,RAB24,GABARAP,CHMP5,FTL,CHMP4A,WDR81,TBC1D5,TICAM1,UBQLN4,MAP1LC3A,SNAP29,ATG4B,CHMP4B,UVRAG,RUFY4,TRIM32,AUP1,PIK3R4,TMEM150B,TEX…
GO:CC	mitochondrial protein-containing complex	GO:0098798	FALSE	8.45541383443613e-7	6.07286513181387	183	6316	90	22149	MRPL13,MRPS28,TIMM8B,MRPS18C,TOMM20L,CLPX,SLC25A5,MRPL33,TIMM17B,CHCHD1,ROMO1,METTL17,MRPL38,TIMM22,DNAJC11,GRPEL2,ISCU,HADHB,DNA2,MRPS6,ISCA2,POLRMT,MRPS35,MTX3,EFHA1,AURKAIP1,TIMM13,MRPL28,NSUN3,AGK,MRPL20,TRMT10B,NFS1,NSUN4,MRPL19,MRPL22,MRPS5,MRPS18B,POLG,PHB,VDAC1,APOOL,GRPEL1,HSPA9,MRPS33,HSD17B10,MRPS26,MRPL17,SAMM50,MRPL3,HADHA,MRPL40,MRPL52,MRPS34,TOMM7,MICOS13,MRPL27,MRPL14,MRPL48,LYRM4…
GO:CC	tertiary granule lumen	GO:1904724	FALSE	9.250706438606258e-7	6.0338251007016614	55	6316	37	22149	MMP8,TIMP2,OLFM4,PTX3,CHIT1,TCN1,LTF,HP,CRISP3,MMP9,CTSD,CAMP,PGLYRP1,CYFIP1,FOLR3,OSCAR,TNFAIP6,SPTAN1,GOLGA7,B2M,YPEL5,CXCL1,PGM1,QSOX1,CFP,ASAH1,QPCT,CNN2,IDH1,ALDOC,ORM1,PPBP,PTPN6,CST3,CTSH,ALDOA,GSDMD
GO:CC	coated vesicle membrane	GO:0030662	FALSE	0.0000012701257636916936	5.896153274498244	200	6316	96	22149	STX17,CD3G,IL7R,FZD5,HLA-DPB1,EGF,KIAA0319,SEC31B,CD3D,HIP1,CLTCL1,COPB2,ATP6V1D,SEC13,COPB1,VTI1A,AP1G2,EPN1,TGOLN2,DNAJC5,ATP6AP1,TMEM199,SEC22B,AFTPH,ATP6V1C1,ATP6AP2,PDCD6,ATP6V0C,LDLRAP1,CNIH,KDELR2,RAB35,DENND1A,SEC23A,B2M,MCFD2,SAR1A,AP2B1,VAMP3,ATP6V1E1,RAB5A,HLA-DRB5,SEC24C,ATP6V1A,VTI1B,TMED2,KLHL12,CLTA,ATP6V0A1,COPZ1,SCYL1,COPA,RAB3A,AP3B1,ATP6V0E2,AP1G1,SAR1B,HLA-A,M6PR,AP1S2,ATP6V1F…
GO:CC	ATPase complex	GO:1904949	FALSE	0.0000013477493349666802	5.870390873797506	128	6316	68	22149	BCL7A,ACTR6,CFDP1,SRCAP,MBD2,YY1,ATP6V1D,MTA3,ARID1A,TRRAP,EP400,ATP6V0E1,ATP6AP1,TMEM199,RB1,ATP6V1C1,ATP6AP2,ING3,SUZ12,ATP6V0C,HDAC2,MYBBP1A,VPS4B,ATP6V1E1,MCRS1,CHD3,SMARCD3,NFRKB,MTA2,ATP6V1A,YY1AP1,ATP6V0A1,MYO1C,ACTB,SMARCD1,VCP,ATP6V1G1,DPF2,TCIRG1,ZNHIT1,ATP6V0E2,CHD4,DPF3,ATP6V1F,ATP6V1B1,ATP6V1G2,ATP6V0D1,BAZ1B,DMAP1,HDAC1,BCL7B,RUVBL2,ATP6V1H,SMARCA4,KAT5,SMARCC2,CECR2,CDK2AP2,RBBP4,B…
GO:CC	phagocytic vesicle	GO:0045335	FALSE	0.000002320247239234098	5.6344657354047465	147	6316	75	22149	LTF,ELANE,CLEC4E,MPO,PGLYRP1,TLR2,IRGM,ITGB5,LAMP1,CDC42,PIK3C3,KIF5B,STXBP3,ATP6V0E1,HGS,ATP7A,SEC22B,RAB7A,ADAM8,ATP6V0C,NCF2,VIM,RAB10,STX4,ATG12,PLD4,TLR9,B2M,MTMR4,VAMP3,RAB5A,TLR1,CYBA,RAB34,SYK,RAB11B,ATG5,LAMP2,SNX3,RAB43,RAB11FIP1,ATP6V0A1,CD36,RAB31,MYO1C,RAB20,TCIRG1,ATP6V0E2,STX12,RAB32,STXBP1,HLA-A,CYBB,ACTG1,SCIMP,MPEG1,SRGAP2,CDC42EP2,ATP6V0D1,INPP5B,SLC9A9,CALR,PDIA3,TLR7,CORO1A,U…
GO:CC	azurophil granule lumen	GO:0035578	FALSE	0.0000034254325699633646	5.4652845771975995	91	6316	52	22149	RETN,CCT2,ARG1,BPI,ELANE,ORM2,MPO,AZU1,RNASE3,CTSG,ACTR2,CYB5R3,PRDX6,GLA,TOLLIP,CREG1,GRN,IMPDH1,STK11IP,GNS,TXNDC5,NPC2,GUSB,CAP1,ARSA,PYCARD,HEBP2,DNAJC3,GCA,MAPK1,SDCBP,GLB1,MNDA,PSMD1,C6ORF120,FUCA1,VCP,FRK,TUBB,FTL,TRAPPC1,ANXA2,PRSS57,DEFA3,PLAC8,DYNC1H1,IST1,PYGB,GDI2,DPP7,VAT1,PTGES2
GO:CC	endocytic vesicle membrane	GO:0030666	FALSE	0.00000610942482157896	5.2139996749575594	205	6316	96	22149	CD3G,IL7R,FZD5,HLA-DPB1,CLEC4E,CD163,EGF,MARCO,KIAA0319,TLR2,CD3D,IRGM,LAMP1,PIK3C3,TGOLN2,ATP6V0E1,ATP7A,SEC22B,CAMK2G,RAB7A,ATP6V0C,LYN,LDLRAP1,RAB10,STX4,ATG12,RAB35,B2M,MTMR4,UBC,AP2B1,VAMP3,RAB5A,TLR1,CYBA,HLA-DRB5,RAB34,WNT7B,RAB11B,ATG5,LAMP2,WNT7A,RAB43,RAB11FIP1,ATP6V0A1,CD36,RAB31,RAB20,TCIRG1,ATP6V0E2,RAB32,HLA-A,M6PR,VAMP2,CYBB,CAMK2B,WNT1,MPEG1,FCGR1A,CACNG8,WLS,SCARB1,AVP,RAB11FIP3,…
GO:CC	autophagosome membrane	GO:0000421	FALSE	0.00000817672204581576	5.087420765121827	58	6316	37	22149	STX17,WIPI1,IRGM,LAMP1,SH3GLB1,RAB2A,CHMP2A,RAB18,CHMP3,RAB7A,CHMP1B,ATP6AP2,ATG12,RAB2B,CHMP7,ATP13A2,GABARAPL2,RB1CC1,LAMP2,CHMP1A,MAP1LC3B,CHMP2B,CALCOCO2,GABARAPL1,GABARAP,CHMP5,CHMP4A,WDR81,MAP1LC3A,SNAP29,ATG4B,CHMP4B,UVRAG,TMEM150B,TEX264,CHMP6,STING1
GO:CC	azurophil granule membrane	GO:0035577	FALSE	0.00000817672204581576	5.087420765121827	58	6316	37	22149	CKAP4,CEACAM8,MGST1,CEACAM6,AZU1,ABCA13,C3AR1,CD63,LAMP1,TMEM30A,GAA,PRCP,DNAJC5,SLCO4C1,RAP1B,ARL8A,NFAM1,BRI3,ATP6V0C,RAB37,GLIPR1,SURF4,TOM1,MANBA,LAMP2,MAGT1,NDUFC2,FPR1,CMTM6,SNAP29,DDOST,NCSTN,CPNE3,VAMP8,RAB44,TMEM179B,BST2
GO:CC	early endosome	GO:0005769	FALSE	0.000008735812324421103	5.058696704692431	438	6316	178	22149	FZD5,LTF,SORT1,NSG1,KIAA0319,EPHA4,SPHK1,RASGEF1B,F2RL1,SIAH2,CD8B,NIPA2,TMEM30A,PLEKHA3,SNX13,KCNQ1,TOLLIP,TSG101,VAC14,PICALM,HGS,PTPN23,HSD17B6,ATP7A,WDFY2,ZMPSTE24,VPS13B,MYO5A,CLIP3,CHMP3,HPS6,RAP1A,TMEM63A,RAB1A,SERPINB1,VPS18,MGRN1,SNX6,LDLRAP1,RAB21,RET,EHD1,PLD4,TLR9,GGA2,B2M,VPS41,MTMR4,VAMP3,TLR4,AP3M2,VPS26A,GRIPAP1,ZFYVE16,TOM1,RAB5A,ARL8B,VPS29,SNX30,CD22,AP3S1,TMEM127,VTI1B,RIN3,SN…
GO:CC	chromosome	GO:0005694	FALSE	0.000013421867630248113	4.8721870486173495	2001	6316	676	22149	RORA,KLF12,TSHZ3,XPO1,BCL7A,EOMES,MIS18A,CEBPA,SRPK1,RPF2,TCF4,THOC1,PRIM1,SATB1,ACTR6,TBX21,MORF4L2,H4C3,SOX6,NHLH1,FOXQ1,NR1D2,CEBPE,CFDP1,CDCA8,JDP2,DMRTC2,MYC,STAT4,TFEB,ACTR2,FOXN2,UBE2A,TAF12,ELF4,KLF13,ACTR3,SRCAP,NACC2,ARPC2,MBD2,DR1,YY1,ARPC3,CBX3,FLI1,TADA3,SEC13,PAFAH1B1,TP53,MTA3,RAD21,PPP4R2,ARID1A,KLF3,CBX5,KDM4A,HDAC3,APC,THAP1,EPAS1,PHF2,TCF7,EXD2,HNRNPC,EPC2,TRIM33,SAP30,TRRAP,SA…
GO:CC	U2-type precatalytic spliceosome	GO:0071005	FALSE	0.000013693297365947009	4.863491960528934	50	6316	33	22149	ZMAT2,WBP4,LSM6,PRPF8,SF3A1,SF3A2,MFAP1,LSM3,BUD13,SNRPG,SNRPE,SF3B4,SNRPB2,SF3A3,SF3B2,SNRNP200,SF3B3,SNRPB,TXNL4A,CWC22,SNIP1,NHP2L1,SMU1,PRPF38A,IK,LSM2,SNRPD2,SF3B5,LSM7,RBMX2,LSM4,SART1,SNRPF
GO:CC	organellar ribosome	GO:0000313	FALSE	0.000013964699468088338	4.854968406239761	89	6316	50	22149	MRPL13,MRPS28,MRPS18C,MRPL33,CHCHD1,METTL17,MRPL38,MTG1,MRPS6,MRPS35,AURKAIP1,MRPL28,NSUN3,MRPL20,NSUN4,MRPL19,MRPL22,MRPS5,MRPS18B,MRPS33,MRPS26,MRPL17,MRPL3,MRPL40,MRPL52,MRPS34,MRPL27,MRPL14,MRPL48,MRPL12,MRPL51,GADD45GIP1,MRPL57,MRPL11,MRPS18A,MRPL54,MRPL41,MRPL55,MRPL2,MRPL21,MRPS15,MRPL24,MRPS2,MRPL37,MRPL34,MRPL4,MRPL15,MRPS21,MRPS7,MRPL43
GO:CC	mitochondrial ribosome	GO:0005761	FALSE	0.000013964699468088338	4.854968406239761	89	6316	50	22149	MRPL13,MRPS28,MRPS18C,MRPL33,CHCHD1,METTL17,MRPL38,MTG1,MRPS6,MRPS35,AURKAIP1,MRPL28,NSUN3,MRPL20,NSUN4,MRPL19,MRPL22,MRPS5,MRPS18B,MRPS33,MRPS26,MRPL17,MRPL3,MRPL40,MRPL52,MRPS34,MRPL27,MRPL14,MRPL48,MRPL12,MRPL51,GADD45GIP1,MRPL57,MRPL11,MRPS18A,MRPL54,MRPL41,MRPL55,MRPL2,MRPL21,MRPS15,MRPL24,MRPS2,MRPL37,MRPL34,MRPL4,MRPL15,MRPS21,MRPS7,MRPL43
GO:CC	coated membrane	GO:0048475	FALSE	0.00001602756688974181	4.795132401947887	99	6316	54	22149	SEC31B,CLTCL1,COPB2,SEC13,COPB1,AP1G2,EPN1,PICALM,CHMP2A,AFTPH,CHMP1B,PDCD6,VPS18,SEC23A,VPS41,SAR1A,AP2B1,AP3M2,AP3S1,SEC24C,KLHL12,CLTA,COPZ1,SCYL1,COPA,AP3B1,AP1G1,SAR1B,AP1S2,SEC24D,ENTHD1,CHMP4A,AP5B1,AP4E1,TBC1D5,SEC31A,AP1B1,BAIAP2L2,CHMP4B,AP2S1,AP3D1,NCALD,SEC24A,STON1,CLTB,COPE,TMED3,PEF1,AP4M1,AP5Z1,AP1S1,AP2M1,AP3S2,COPZ2
GO:CC	membrane coat	GO:0030117	FALSE	0.00001602756688974181	4.795132401947887	99	6316	54	22149	SEC31B,CLTCL1,COPB2,SEC13,COPB1,AP1G2,EPN1,PICALM,CHMP2A,AFTPH,CHMP1B,PDCD6,VPS18,SEC23A,VPS41,SAR1A,AP2B1,AP3M2,AP3S1,SEC24C,KLHL12,CLTA,COPZ1,SCYL1,COPA,AP3B1,AP1G1,SAR1B,AP1S2,SEC24D,ENTHD1,CHMP4A,AP5B1,AP4E1,TBC1D5,SEC31A,AP1B1,BAIAP2L2,CHMP4B,AP2S1,AP3D1,NCALD,SEC24A,STON1,CLTB,COPE,TMED3,PEF1,AP4M1,AP5Z1,AP1S1,AP2M1,AP3S2,COPZ2
GO:CC	ubiquitin ligase complex	GO:0000151	FALSE	0.00001774289733123688	4.750975460478023	323	6316	137	22149	DCAF16,KLHL20,RNF144B,ANKRD9,MED21,UBE2A,ANAPC11,CUL3,LMO7,FBXO44,UBE2D3,FBXL5,SHARPIN,USP33,PCGF3,TNFAIP1,ZER1,FBXO42,MKLN1,MED1,FBXL22,PDCD6,TRAF7,FEM1C,CDKN1B,SPOPL,ANAPC13,RING1,FBXO11,YPEL5,SYVN1,MED11,FBXW11,PCGF1,WDR77,UBE4B,DCUN1D3,MED30,ANAPC2,SKP1,FBXL8,BRAP,ZSWIM6,KLHDC1,RNF217,FBXO15,RANBP9,CBX4,KLHL12,LZTR1,UBE2D2,WDR26,MED8,SEL1L,KLHL8,UBAC1,MED12,RMND5A,UBR2,BTRC,RAD18,FBXL20,BRCC3…
GO:CC	cell periphery	GO:0071944	FALSE	0.000020177634170089597	4.695129756191683	6347	6316	1972	22149	GPR18,MMP8,GRB10,CAPNS2,APCDD1,TRAV16,GPR171,IRAK3,CACNB2,TRAV5,ITM2A,TIMP2,CKAP4,KLRB1,OLFM4,STX17,CD3G,KLRG1,IL7R,CEACAM8,KCNE1,ARL4C,PTX3,TSPAN4,MGST1,CEACAM6,TSHZ3,FZD5,FCER1A,CHIC1,LTB4R,IGF1R,CLEC3B,HLA-DPB1,VCAN,SLC28A3,TRGC2,S100A12,PNPLA2,DLGAP3,KCNA3,LTF,SYTL2,LHFPL2,HAX1,TNIK,CRISP3,PSTPIP2,ASPH,OLFML2A,TRGV9,TNS2,ALOX15B,CDK5R1,ELANE,TRGV5,CLEC1B,RHD,GP6,GPR174,SORT1,MS4A7,PGM5,TRPM2,…
GO:CC	plasma membrane	GO:0005886	FALSE	0.000020328185826622776	4.691901377911052	5866	6316	1831	22149	GPR18,GRB10,CAPNS2,APCDD1,TRAV16,GPR171,IRAK3,CACNB2,TRAV5,ITM2A,CKAP4,KLRB1,OLFM4,STX17,CD3G,KLRG1,IL7R,CEACAM8,KCNE1,ARL4C,TSPAN4,MGST1,CEACAM6,TSHZ3,FZD5,FCER1A,CHIC1,LTB4R,IGF1R,HLA-DPB1,SLC28A3,TRGC2,S100A12,PNPLA2,DLGAP3,KCNA3,LTF,SYTL2,LHFPL2,HAX1,TNIK,PSTPIP2,ASPH,TRGV9,TNS2,ALOX15B,CDK5R1,TRGV5,CLEC1B,RHD,GP6,GPR174,SORT1,MS4A7,PGM5,TRPM2,PLEKHA1,RAB13,TGFBR3,ADORA3,KREMEN1,TRAV12-2,THEM…
GO:CC	preribosome	GO:0030684	TRUE	0.0000208659427754011	4.680561987999748	107	6316	57	22149	RPS3A,UTP20,RPS7,UTP14A,RIOK3,RRP1B,PPAN,RRP36,KRI1,MDN1,RPS19BP1,WDR74,NOC4L,ZNF622,RRP1,FCF1,NAT10,BMS1,UTP6,LAS1L,PDCD11,BOP1,EXOSC10,WDR3,AATF,NOC2L,RRP9,NOL10,PWP2,IMP3,NOP56,UTP14C,UTP15,RRS1,NHP2L1,HEATR1,WDR36,NOP58,RPS14,RPS27,RPS28,EIF6,RPS5,RPS11,RPS6,RPS16,RPS19,SLX9,RPS23,FBLL1,RPS9,PES1,RPS27A,RPS8,TBL3,RPS15A,IMP4
GO:CC	late endosome	GO:0005770	FALSE	0.00004029120876863	4.3947897032328385	321	6316	135	22149	HLA-DPB1,NSG1,GIMAP5,ATP7B,IRGM,RASGEF1B,CLTCL1,CD63,LAMP1,UBE2A,LAMTOR2,PIK3C3,TMEM30A,VTI1A,PRKAR1B,KCNQ1,TSG101,VAC14,NBR1,HGS,RNF13,CHMP2A,ATP7A,ZMPSTE24,MYO5A,GRN,IFNAR1,ARL8A,TMEM59,CHMP3,OSBPL1A,RAP1A,RAB7A,CHMP1B,VPS18,LRRK2,VPS4B,CHMP7,LAMTOR3,B2M,VPS41,RAPGEF2,MTMR4,OSBPL11,RAB27A,HLA-DRB5,NPC1,ARL8B,VPS29,EXOC8,ATP13A2,SLA2,YIPF1,PRKAR1A,ANKRD13D,LAMP2,VTI1B,HDAC6,MAPK1,CHMP1A,ASTN2,RN…
GO:CC	fibrillar center	GO:0001650	FALSE	0.000044607196469130375	4.350595071002881	150	6316	73	22149	NUAK1,CDK7,POLR2F,URB1,JAZF1,KDM4A,RAE1,THAP1,SPECC1,SAP30L,ESRRA,FOXJ2,CHCHD1,BCL9L,CAMK4,TRAF4,TRERF1,ZNRF2,MALT1,MTDH,SPATA2,NEDD1,MLLT1,YY1AP1,ARHGAP32,TAF4B,SNRPB2,RREB1,E2F5,TCOF1,SESN1,TIMM13,EIF3L,NONO,CCR2,ORC6,SP140,POLR1G,CDCA7L,EZR,NRIP1,APEX2,NOLC1,ACACA,TTF1,SMARCA4,IP6K2,DEAF1,NOP56,OTP,UBTF,SIRT1,AFF4,NHEJ1,BTBD10,UTP15,SNAI1,CD2AP,HEATR1,ZNF415,NUFIP1,CD2BP2,LEO1,NOP58,GAR1,NOP53…
GO:CC	side of membrane	GO:0098552	FALSE	0.000046968563282061465	4.328192724215639	746	6316	277	22149	CD3G,IL7R,CEACAM8,CEACAM6,FCER1A,HLA-DPB1,TRGV9,TRGV5,PGM5,TGFBR3,CD1C,CD8A,CLEC4E,CD163,CLEC12B,ITGA2B,LY9,CXCR6,BTN3A2,FOLR3,FCRL3,THBS1,CD83,SELP,ITGB3,GP1BA,PTPN4,CD3D,ASGR2,IL1R1,SLC7A5,SLAMF7,IL13RA1,G6PD,NTNG2,CD177,MS4A1,KLRC4,TRDC,ABCB1,CCR5,GNB1,LAMP1,CD27,CD3E,CHUK,GNAI2,SAMD10,ITGB2,KCNQ1,PTPRC,GNAI3,GSR,BTN2A1,IL11RA,MAP3K5,TRAF6,TNFRSF14,ANK1,GNA13,HYAL2,IQGAP1,GPR15,ATP6AP2,CD302,J…
GO:CC	Golgi apparatus subcompartment	GO:0098791	FALSE	0.00005408154548820536	4.26695090605664	389	6316	158	22149	KLHL20,NDST1,HLA-DPB1,SORT1,MS4A7,RAB13,NSG1,WIPI1,FUT8,B4GALT5,ATP8B4,ATP7B,RAB30,CLTCL1,PCSK7,MMP24,VTI1A,PCSK5,PLEKHA3,TGOLN2,VCPIP1,SGMS1,COG7,ATP7A,VPS13B,CLIP3,GRN,TMEM59,SULF2,ARFGEF1,FAM91A1,LYPLA2,AFTPH,MOB4,GALNT1,ARFIP1,TJAP1,RAB21,LRRK2,RAB10,STX4,PLD4,MYO18A,MGAT4B,GOLGA7,GGA2,SAR1A,VAMP3,ATXN2,UXS1,ATG9B,GALNT3,INPP5K,HLA-DRB5,RAB34,YIPF1,OSBP,LAMP2,NSF,TMED2,RAB43,CLTA,GOLGA8A,TMEM…
GO:CC	midbody	GO:0030496	FALSE	0.00006951520053233106	4.157920220078924	208	6316	94	22149	CLIC4,RASGEF1B,CDCA8,CDC42,PIK3C3,RAD21,C6ORF89,GNAI2,SH3GLB1,EXOC6,GNAI3,TSG101,CHMP2A,SSH1,ARL8A,LZTS2,CHMP3,SEPT6,TXNDC9,IQGAP1,CHMP1B,JTB,MICAL3,PKN2,C9ORF72,VPS4B,SPAST,CHMP7,DDX11,EXOC3,YPEL5,EML3,RALB,ARL8B,KATNA1,PLK1,MSRA,CHMP1A,KIF20B,VPS37B,EXOC2,CHMP2B,SCCPDH,STK17B,INCENP,CNTRL,LYRM1,CHMP5,NAT10,KIF13A,TBCK,PSRC1,MITD1,CCDC69,ANXA2,GEM,TTC23L,NUDC,TRAPPC14,TEX14,CHMP4A,MTCL2,RAB11FIP…
GO:CC	small ribosomal subunit	GO:0015935	FALSE	0.00009290273816011211	4.031971485680172	76	6316	43	22149	RPS3A,RPS27L,MRPS28,RPS7,MRPS18C,CHCHD1,METTL17,MRPS6,MRPS35,AURKAIP1,MRPS5,MRPS18B,MRPS33,MRPS26,DHX29,MRPS34,FAU,RPS14,RPS27,RPS20,RPS28,RPS29,RPSA,RPS3,MRPS18A,RPS5,RPS2,RPS21,RPS11,RPS6,MRPS15,RPS16,RPS15,RPS19,RPS23,RPS9,RACK1,MRPS2,RPS27A,RPS8,RPS15A,MRPS21,MRPS7
GO:CC	outer membrane	GO:0019867	FALSE	0.00011015571832152983	3.957992953156646	260	6316	112	22149	MTARC1,HK2,MGST1,DAO,HAX1,MAOA,EPHA4,IFI27,CYB5R3,PLEC,PTRH2,EXD2,SH3GLB1,TOMM20L,TSPO,SARM1,SLC44A1,FOXO3,LRRK2,MFF,PLD6,BID,HMOX1,ITPR3,UBC,PMAIP1,DMPK,ANGEL1,ITPRIP,GLTPD1,NLRX1,ANKH,DNAJC11,EMD,TAZ,GDAP1,RHOT1,SIGMAR1,DCAKD,PINK1,ARMC10,ACSL6,HADHB,NUTF2,SOX10,BCL2A1,MTX3,BBC3,PI4KB,KRAS,RAB32,AGK,SYNJ2BP,MGARP,MGST3,CLMN,MTCH2,SYNE3,MFN2,KMO,MOAP1,RHOD,BPHL,CYB5A,PTGS2,SLC25A47,CISD1,VDAC2,R…
GO:CC	ficolin-1-rich granule membrane	GO:0101003	FALSE	0.00011934547045529304	3.9231940592177734	60	6316	36	22149	TRPM2,SIRPA,CR1,LAMP1,DIAPH1,COPB1,GAA,PRCP,ITGB2,CD58,CD300A,ARL8A,ADAM8,ATP6AP2,ATP6V0C,DSC1,DOK3,LAMP2,CLEC4D,ATP6V0A1,TBC1D10C,ATAD3B,UBR4,TCIRG1,LGALS3,PTPRN2,FPR1,LILRB2,MGAM,NCKAP1L,NBEAL2,DYNC1LI1,SERPINB6,STBD1,DYNLL1,TMEM179B
GO:CC	organelle outer membrane	GO:0031968	FALSE	0.00013377918530859607	3.8736114531513515	258	6316	111	22149	MTARC1,HK2,MGST1,DAO,HAX1,MAOA,EPHA4,IFI27,CYB5R3,PLEC,PTRH2,EXD2,SH3GLB1,TOMM20L,TSPO,SARM1,SLC44A1,FOXO3,LRRK2,MFF,PLD6,BID,HMOX1,ITPR3,UBC,PMAIP1,DMPK,ANGEL1,ITPRIP,GLTPD1,NLRX1,DNAJC11,EMD,TAZ,GDAP1,RHOT1,SIGMAR1,DCAKD,PINK1,ARMC10,ACSL6,HADHB,NUTF2,SOX10,BCL2A1,MTX3,BBC3,PI4KB,KRAS,RAB32,AGK,SYNJ2BP,MGARP,MGST3,CLMN,MTCH2,SYNE3,MFN2,KMO,MOAP1,RHOD,BPHL,CYB5A,PTGS2,SLC25A47,CISD1,VDAC2,RETSAT…
GO:CC	proton-transporting two-sector ATPase complex	GO:0016469	FALSE	0.00014652925155795438	3.834075668674399	49	6316	31	22149	ATP6V1D,ATP6V0E1,ATP6AP1,TMEM199,ATP6V1C1,ATP6AP2,ATP6V0C,ATP6,ATP5J,ATP6V1E1,ATP6V1A,ATP6V0A1,ATP6V1G1,TCIRG1,ATP6V0E2,ATP6V1F,ATP6V1B1,ATP6V1G2,ATP6V0D1,ATP6V1H,ATP5MF,ATP5ME,ATP5MG,ATP5MJ,ATP5MC2,ATP5F1D,ATP5MK,ATP5F1E,ATP5PO,RNASEK,ATP5MC3
GO:CC	histone deacetylase complex	GO:0000118	FALSE	0.00016310351233602758	3.7875366865885955	82	6316	45	22149	HINT1,ACTR6,CFDP1,SRCAP,MBD2,MTA3,CBX5,HDAC3,SAP30,TRRAP,SAP130,EP400,SETD5,SAP30L,ING3,HDAC2,RCOR1,MORF4L1,ZNF217,HDAC4,ING2,TRERF1,CHD3,DNTTIP1,MTA2,HDAC6,SIN3B,ING1,HR,ZNHIT1,TBL1Y,ZNF541,TBL1X,CHD4,BRMS1,NRIP1,DMAP1,HDAC1,RUVBL2,KAT5,CDK2AP2,RBBP4,RBBP7,MBD3,HDAC10
GO:CC	precatalytic spliceosome	GO:0071011	FALSE	0.0001694797013865257	3.770882309872242	56	6316	34	22149	ZMAT2,WBP4,LSM6,PRPF8,SF3A1,SF3A2,MFAP1,LSM3,BUD13,SNRPG,SNRPE,SF3B4,SNRPB2,BCAS2,SF3A3,SF3B2,SNRNP200,SF3B3,SNRPB,TXNL4A,CWC22,SNIP1,NHP2L1,SMU1,PRPF38A,IK,LSM2,SNRPD2,SF3B5,LSM7,RBMX2,LSM4,SART1,SNRPF
GO:CC	vesicle coat	GO:0030120	FALSE	0.00017541887364969482	3.755923681888168	63	6316	37	22149	SEC31B,CLTCL1,COPB2,SEC13,COPB1,AP1G2,EPN1,AFTPH,PDCD6,SEC23A,SAR1A,AP2B1,SEC24C,KLHL12,CLTA,COPZ1,SCYL1,COPA,AP1G1,SAR1B,AP1S2,SEC24D,ENTHD1,TBC1D5,SEC31A,AP1B1,AP2S1,NCALD,SEC24A,STON1,CLTB,COPE,TMED3,PEF1,AP1S1,AP2M1,COPZ2
GO:CC	endoplasmic reticulum-Golgi intermediate compartment	GO:0005793	FALSE	0.0002238394250605984	3.6500634183513996	139	6316	67	22149	STX17,F5,PRRG4,COPB1,RAB2A,CNIH4,DDHD2,VPS13B,ZDHHC20,ATP6AP1,TMEM199,SEC22B,RAB18,UGGT1,GALNT1,CNIH,RAB37,MYO18A,MGAT4B,MCFD2,SURF4,HMGB1,TMED5,TMED2,LRPAP1,TRIP11,MTMR6,MAN1A1,SCYL1,WHAMM,ERGIC1,CTSZ,RER1,STK17B,MGAT1,TMEM203,RAB6B,CA4,PDIA6,ASPSCR1,FN1,INPP5B,AZIN2,GBF1,TBC1D20,CALR,SEC23IP,LMAN2L,IST1,UVRAG,TGFA,SERPINH1,ERGIC2,MPPE1,YIF1B,ERGIC3,TMED1,TMED3,BCAP31,KDELR1,YIF1A,STING1,STX5,MY…
GO:CC	small-subunit processome	GO:0032040	FALSE	0.0002283976660838206	3.6413083383075238	73	6316	41	22149	RPS3A,UTP20,RPS7,UTP14A,RPS19BP1,NOC4L,FCF1,NAT10,BMS1,UTP6,PDCD11,EXOSC10,WDR3,AATF,RRP9,NOL10,PWP2,IMP3,NOP56,UTP14C,UTP15,NHP2L1,HEATR1,WDR36,NOP58,RPS14,RPS27,RPS28,RPS5,RPS11,RPS6,RPS16,RPS19,RPS23,FBLL1,RPS9,RPS27A,RPS8,TBL3,RPS15A,IMP4
GO:CC	nuclear membrane	GO:0031965	FALSE	0.0002472410327704352	3.606879450949957	321	6316	132	22149	XPO1,HAX1,FAM209B,SORT1,IFI27,AQP1,FAM169A,SCAI,TOR1A,CBX3,PAFAH1B1,AAAS,KPNB1,BROX,TOR1AIP2,TOR1AIP1,RNF13,ZMPSTE24,OSBPL8,CLIC1,ALOX5,SLC16A3,TMX4,SUMO1,CLCC1,NUP210,STAU2,C9ORF72,IFFO1,ARL6IP6,CMTM3,SPAST,ITPR3,TNKS,LBR,QSOX2,PAK1,SURF4,TM7SF2,TMC8,KPNA4,DPY19L3,DMPK,EI24,NUP153,ITPRIP,BRAP,RB1CC1,GLTPD1,SHISA5,EMD,PUM2,ALOX5AP,MTDH,SLC30A1,SMAD3,SDCBP,DUSP2,TNRC18,AEN,THAP7,GNAQ,NUP50,AKIRIN1…
GO:CC	transferase complex, transferring phosphorus-containing groups	GO:0061695	FALSE	0.00030789141179411896	3.5116024249728723	325	6316	133	22149	IGF1R,PRKAB2,CDK5R1,PRKACB,PRIM1,TAF12,CDK7,PIK3C3,TADA3,POLR2F,CCNH,CHUK,POLR2E,PRKAR1B,TRRAP,GTF2A1,TGFBR1,VAC14,CDKN2D,MED13,MAP3K5,RB1,CRCP,ENY2,TBPL1,PIK3CA,PIK3CG,PYDC1,Q16594,PFKFB1,C9ORF72,PYCARD,CAB39,KAT2A,TAF10,ACVR1C,TANK,TAF7,CDK19,SNW1,SLA2,POLR2L,RB1CC1,PRKAR1A,CCNE1,CCNK,ACVR1,PIK3C2B,CCNI2,PRKCZ,STRADB,POLR3F,GTF2A2,TAF9B,MED12,IKBKB,PHKA2,PRKAA1,TAF4B,TBK1,CCNL2,GTF2H1,CDK4,CDKN…
GO:CC	mitochondrial large ribosomal subunit	GO:0005762	FALSE	0.0003651997239500614	3.437469559415423	55	6316	33	22149	MRPL13,MRPL33,MRPL38,MRPL28,NSUN3,MRPL20,NSUN4,MRPL19,MRPL22,MRPL17,MRPL3,MRPL40,MRPL52,MRPL27,MRPL14,MRPL48,MRPL12,MRPL51,GADD45GIP1,MRPL57,MRPL11,MRPS18A,MRPL54,MRPL41,MRPL55,MRPL2,MRPL21,MRPL24,MRPL37,MRPL34,MRPL4,MRPL15,MRPL43
GO:CC	organellar large ribosomal subunit	GO:0000315	FALSE	0.0003651997239500614	3.437469559415423	55	6316	33	22149	MRPL13,MRPL33,MRPL38,MRPL28,NSUN3,MRPL20,NSUN4,MRPL19,MRPL22,MRPL17,MRPL3,MRPL40,MRPL52,MRPL27,MRPL14,MRPL48,MRPL12,MRPL51,GADD45GIP1,MRPL57,MRPL11,MRPS18A,MRPL54,MRPL41,MRPL55,MRPL2,MRPL21,MRPL24,MRPL37,MRPL34,MRPL4,MRPL15,MRPL43
GO:CC	clathrin-coated vesicle	GO:0030136	FALSE	0.00037016484081879813	3.431604833998906	220	6316	96	22149	CD3G,IL7R,FZD5,HLA-DPB1,HAX1,SORT1,RAB13,WIPI1,EGF,KIAA0319,CD3D,HIP1,CLTCL1,DNAJC6,RGS19,ATP6V1D,SCYL2,VTI1A,AP1G2,EPN1,TGOLN2,DNAJC5,PICALM,ATP7A,ATP6AP1,AFTPH,LMBRD1,ATP6V1C1,ATP6AP2,ATP6V0C,VPS18,LDLRAP1,RAB35,DENND1A,SNX18,GGA2,VPS41,AP2B1,VAMP3,RAB27A,ATP6V1E1,RAB5A,HLA-DRB5,FCHO2,ATP6V1A,SNX3,CLTA,ASTN2,ATP6V0A1,SPG21,NUMB,RAB3A,AP3B1,ATP6V0E2,GPR107,AP1G1,M6PR,AP1S2,ATP6V1F,VAMP2,SFTPC,FC…
GO:CC	cytoplasmic side of plasma membrane	GO:0009898	FALSE	0.000397283631551937	3.400899327904899	165	6316	76	22149	PGM5,PTPN4,G6PD,GNB1,CHUK,GNAI2,SAMD10,PTPRC,GNAI3,TRAF6,ANK1,GNA13,IQGAP1,JAK2,LYN,LDLRAP1,RAB21,FADD,EPB41,SNX18,CHMP7,GNG8,MIEN1,LILRB4,SYAP1,AP2B1,PTEN,OSBPL2,S100A6,TRAF3IP2,STAC3,DNAJA3,SLC4A1,FES,GNB4,GNG2,GNAQ,IKBKB,TRAF1,RGS2,GNG10,GNB5,GNG3,CDH1,GNG5,KRAS,PTPN7,HCK,PTP4A1,KCNAB2,GNAZ,SPTA1,CNR2,AJAP1,GEM,PTPN3,CHMP4A,GNB3,ASPSCR1,JAK1,TRAF2,NPHS2,ESYT2,GNGT2,CHMP4B,AP2S1,MTSS1,SHROOM4,R…
GO:CC	nuclear pore	GO:0005643	FALSE	0.00048433046214115715	3.3148582149845067	97	6316	50	22149	KPNA3,SEC13,AAAS,KPNB1,RAE1,RANBP3,CHMP2A,CHMP3,MVP,ENY2,CHMP1B,SUMO1,XPO7,NUP210,NUP160,BICD2,VPS4B,CHMP7,TNKS,XPO4,KPNA4,NUP153,NUP62CL,NUP214,AGFG1,CHMP1A,NUP50,XPOT,NUTF2,GLE1,CHMP2B,RANBP17,CHMP5,TPR,NUP43,NXT1,ZC3HC1,CHMP4A,RANBP1,NUP155,RANGAP1,NUP62,NUP93,MCM3AP,CHMP4B,NUP205,PARP11,MAD1L1,NUP107,CHMP6
GO:CC	nuclear matrix	GO:0016363	FALSE	0.0006496727101268732	3.1873053756391703	129	6316	62	22149	CLIC4,SRPK1,THOC1,SATB1,GFI1B,YY1,TP53,RAD21,ZNF350,ATN1,CAD,KRT18,MEN1,ARFGEF1,ALOX5,NUMA1,TINF2,VIM,PSMA6,CENPW,IFFO1,GMCL1,OGG1,SNW1,CEBPB,MBD1,DNMT3A,CHMP1A,PRKCZ,KRT8,XPOT,ACTB,SMARCD1,RNASEL,KIN,MORC2,PRPF40A,CASK,ATXN1,CFL1,NONO,BASP1,DGKQ,TGFB1I1,ANXA2,GMCL2,ENC1,HNRNPM,DCAF7,NCOR2,SRRM1,RUVBL2,HNRNPU,SMARCA4,SMARCC2,POLA1,SMC1A,PIAS4,NUFIP1,MORC3,PHB2,NSMF
GO:CC	trans-Golgi network	GO:0005802	FALSE	0.000663883113250874	3.177908378069806	268	6316	112	22149	KLHL20,NDST1,HLA-DPB1,MS4A7,RAB13,NSG1,WIPI1,ATP8B4,ATP7B,RAB30,CLTCL1,PCSK7,MMP24,VTI1A,PCSK5,PLEKHA3,TGOLN2,COG7,ATP7A,VPS13B,CLIP3,GRN,ARFGEF1,FAM91A1,AFTPH,ARFIP1,TJAP1,RAB21,LRRK2,RAB10,STX4,PLD4,MYO18A,GGA2,VAMP3,ATXN2,ATG9B,INPP5K,HLA-DRB5,YIPF1,OSBP,LAMP2,RAB43,CLTA,APP,CBY1,DPY30,CORO7,RAB31,ATP8B2,VPS52,MME,CHST2,CDH1,ST3GAL1,BICD1,AP1G1,RAB32,DENND5A,TGFBI,SORL1,SCAMP5,M6PR,AP1S2,STX10…
GO:CC	ribonucleoprotein granule	GO:0035770	FALSE	0.0007165485678680281	3.144754367664083	277	6316	115	22149	TDRD9,HAX1,TRIM71,RPLP0,PIWIL4,RNF135,CTSG,FASTKD5,CDC42,CSDE1,EIF4EBP2,KPNB1,ROCK1,TNRC6A,YTHDF3,ZC3H12D,DAZAP2,DIS3L2,BTBD2,UPF1,LSM6,PABPC1L,LSM14B,ZFP36L1,IQGAP1,SERPINB1,SUMO1,EIF4E2,CNOT3,PSMA6,STAU2,C9ORF72,ANKRD34B,FXR1,LSM3,PSMA4,ATXN2,PAN2,QKI,TRIM25,RBM4,OGFOD1,GIGYF2,LSM14A,SNRPG,PIWIL2,PUM2,DHX9,SAMD4B,TDRKH,RPL28,RPUSD3,HNRNPK,PNRC1,CNOT2,FMR1,ACTB,SNRPB2,VCP,SARNP,CARHSP1,UBAP2,TDR…
GO:CC	cytochrome complex	GO:0070069	FALSE	0.0009164131903306921	3.0379086684496768	32	6316	22	22149	NDUFA4,COX6A1,COX7B,UQCR10,UQCRQ,COX5A,UQCRFS1,COX8A,COX3,COX6B1,COX2,COX1,UQCRB,CYTB,COX6B2,COX4I1,COX7C,UQCRC1,CYC1,UQCRH,NDUFA4L2,UQCRHL
GO:CC	transport vesicle	GO:0030133	FALSE	0.0009584802408073741	3.0184168357298686	453	6316	174	22149	STX17,HLA-DPB1,SYTL2,DEFA4,SORT1,RAB13,SYP,SEC31B,PLIN3,MCTP1,CLTCL1,TOR1A,LAMP1,COPB2,ARPC2,ATP6V1D,SEC13,COPB1,TMEM30A,VTI1A,OVGP1,AP1G2,TGOLN2,KCNQ1,DNAJC5,PICALM,ATP7A,ATP6AP1,SEC22B,BLOC1S3,AFTPH,SEPT6,ATP6V1C1,RAB7A,ATP6AP2,NDEL1,PDCD6,ATP6V0C,RAB1A,FGFR4,CNIH,LRRK2,RAB10,MFF,KDELR2,COPS5,SEC23A,ITPR3,B2M,MCFD2,SAR1A,VAMP3,SLC6A9,AP3M2,SLC9B2,SURF4,RAB27A,ATP6V1E1,PRRT2,GABBR1,RAB5A,APH1B,H…
GO:CC	U2-type catalytic step 2 spliceosome	GO:0071007	FALSE	0.0009863199615704483	3.005982177347674	30	6316	21	22149	SNRNP40,PRPF8,SYF2,SNW1,CRNKL1,BUD31,SNRPG,SNRPE,CWC15,CDC40,SNRPB2,BCAS2,PPIL1,AQR,XAB2,DHX8,SNRPB,CWC22,PRPF19,SNRPD2,SNRPF
GO:CC	mitochondrial outer membrane	GO:0005741	FALSE	0.0010004644136470727	2.999798354535585	227	6316	97	22149	MTARC1,HK2,MGST1,DAO,HAX1,MAOA,EPHA4,IFI27,CYB5R3,PLEC,PTRH2,EXD2,SH3GLB1,TOMM20L,TSPO,SARM1,SLC44A1,FOXO3,LRRK2,MFF,PLD6,BID,HMOX1,UBC,PMAIP1,DMPK,ANGEL1,NLRX1,DNAJC11,TAZ,GDAP1,RHOT1,DCAKD,PINK1,ARMC10,ACSL6,HADHB,SOX10,BCL2A1,MTX3,BBC3,PI4KB,KRAS,RAB32,AGK,SYNJ2BP,MGARP,MGST3,MTCH2,MFN2,KMO,MOAP1,RHOD,BPHL,CYB5A,SLC25A47,CISD1,VDAC2,VDAC1,ARMCX3,APOOL,AIFM2,ADRBK1,HSPA9,STARD7,PDE2A,PARK2,TUFM…
GO:CC	neuron projection cytoplasm	GO:0120111	TRUE	0.0011428027960813626	2.9420287057050967	89	6316	46	22149	PAFAH1B1,KIF5B,EIF4EBP2,KIF1C,TERF2,ARL8A,BLOC1S3,HSBP1,NDEL1,MAP2K4,RAB21,LRRK2,STAU2,SPAST,AP3M2,FBXW11,ARL8B,TRIM46,AGTPBP1,AP3S1,HDAC6,SYBU,FMR1,SNAPIN,KIF5C,CDKL5,AP3B1,HAP1,HSPB1,MGARP,RAB27B,RANGAP1,HNRNPU,ARMCX3,PURA,DYNC1H1,KIF3B,AP3D1,UHMK1,STAU1,PQBP1,ABHD12,DYNLL1,BLOC1S1,AP3S2,SOD1
GO:CC	phagocytic vesicle membrane	GO:0030670	FALSE	0.0011684808825721982	2.9323783886729706	84	6316	44	22149	CLEC4E,TLR2,IRGM,LAMP1,PIK3C3,ATP6V0E1,ATP7A,SEC22B,RAB7A,ATP6V0C,RAB10,STX4,ATG12,B2M,MTMR4,VAMP3,RAB5A,TLR1,CYBA,RAB34,RAB11B,ATG5,LAMP2,RAB43,RAB11FIP1,ATP6V0A1,RAB31,RAB20,TCIRG1,ATP6V0E2,RAB32,HLA-A,CYBB,MPEG1,ATP6V0D1,INPP5B,SLC9A9,CALR,CORO1A,TLR6,PIK3R4,RAPGEF1,VAMP8,HLA-B
GO:CC	transcription repressor complex	GO:0017053	FALSE	0.0011739699609630528	2.930343015486097	79	6316	42	22149	ELANE,MYC,CTBP2,DR1,TP53,MIER1,JAZF1,CBX5,HDAC3,ZNF350,SP3,MEN1,RBPJ,RCOR1,FOXO3,HDAC4,MAX,CTNNB1,CTBP1,CTNNBIP1,JUND,HMGB1,LIN54,TFAP4,RLIM,RBBP8,RELB,MXD1,LIN52,BIN1,TBL1X,DEPDC1,CCND1,GPS2,PRDM16,NCOR2,HDAC1,CRY2,PRDM10,PER2,HEY2,DRAP1
GO:CC	vacuolar lumen	GO:0005775	FALSE	0.0011974695632104612	2.9217355164918826	180	6316	80	22149	RETN,CCT2,VCAN,ARG1,BPI,ELANE,NSG1,ORM2,MPO,CTSD,AZU1,RNASE3,HPSE,EPDR1,CTSG,ACTR2,CYB5R3,PRDX6,GAA,GLA,TOLLIP,CREG1,GRN,IMPDH1,STK11IP,GNS,TXNDC5,NPC2,GUSB,CAP1,ARSA,PYCARD,HEBP2,DNAJC3,GCA,IFI30,ATP13A2,MANBA,LAMP2,MAPK1,SDCBP,GYG1,ASAH1,GLB1,MNDA,PSMD1,C6ORF120,GPC3,FUCA1,VCP,FRK,TUBB,NEU1,FTL,TRAPPC1,ANXA2,PRSS57,HEXA,DEFA3,TPP1,CTSK,GALC,PLAC8,GBA,TCN2,DYNC1H1,IST1,PYGB,SMPD1,GDI2,DPP7,PLD3,…
GO:CC	protein acetyltransferase complex	GO:0031248	FALSE	0.0012242135890882008	2.9121428040287407	102	6316	51	22149	MORF4L2,TAF12,DR1,TADA3,EPC2,TRRAP,EP400,HCFC1,ENY2,ING3,Q16594,MORF4L1,NAA50,KAT2A,TAF10,TAF7,KANSL3,MCRS1,BRD1,TAF9B,MSL1,ACTB,ING5,NAA11,EPC1,MAP3K7,KAT6A,ACTG1,POTEE,DMAP1,TAF6,USP22,RUVBL2,TAF5,MSL3,TAF4,SF3B3,NAA30,KAT5,MSL2,PHF20L1,ZZZ3,WDR5,ATXN7L3,TADA1,POLE4,SF3B5,NAA38,NAA10,SGF29,ING4
GO:CC	Cul3-RING ubiquitin ligase complex	GO:0031463	TRUE	0.0013593665854738388	2.866663409654806	39	6316	25	22149	KLHL20,CUL3,TNFAIP1,PDCD6,SPOPL,KLHL12,LZTR1,KLHL8,KLHL7,SPOP,KBTBD7,KLHL22,KLHL2,ARIH1,ENC1,DEPDC5,KCTD5,KCTD17,KLHL9,KBTBD8,KLHDC5,KLHL24,KEAP1,RBX1,PEF1
GO:CC	cytoplasmic ribonucleoprotein granule	GO:0036464	FALSE	0.0016812346891862684	2.7743716577061233	258	6316	107	22149	TDRD9,HAX1,TRIM71,RPLP0,PIWIL4,RNF135,CTSG,CDC42,CSDE1,EIF4EBP2,KPNB1,ROCK1,TNRC6A,YTHDF3,ZC3H12D,DAZAP2,DIS3L2,BTBD2,UPF1,LSM6,PABPC1L,LSM14B,ZFP36L1,IQGAP1,SERPINB1,EIF4E2,CNOT3,PSMA6,STAU2,C9ORF72,ANKRD34B,FXR1,LSM3,PSMA4,ATXN2,PAN2,QKI,TRIM25,RBM4,OGFOD1,GIGYF2,LSM14A,SNRPG,PIWIL2,PUM2,DHX9,SAMD4B,TDRKH,RPL28,HNRNPK,PNRC1,CNOT2,FMR1,ACTB,SNRPB2,VCP,SARNP,CARHSP1,UBAP2,TDRD7,FAM184A,PPP6R2,TUB…
GO:CC	specific granule membrane	GO:0035579	FALSE	0.0016944198009273086	2.770978982057636	90	6316	46	22149	CKAP4,CEACAM8,TRPM2,CLEC5A,OLR1,ATP8B4,C3AR1,MCEMP1,CD177,LAMTOR2,ATP6V1D,AGPAT2,TMEM30A,ITGB2,DNAJC5,SLCO4C1,DEGS1,RAP1A,TMEM63A,ADAM8,MOSPD2,RAB37,LAMTOR3,STK10,ITGAM,TOM1,CYBA,LAIR1,CLEC4D,CD36,UBR4,CMTM6,PLAUR,SLC2A5,CYBB,KCNAB2,SLC15A4,CEACAM3,P2RX1,ITGAL,ANO6,PLAU,MLEC,VAMP8,MS4A3,RAB44
GO:CC	COPII-coated ER to Golgi transport vesicle	GO:0030134	FALSE	0.0016944198009273086	2.770978982057636	90	6316	46	22149	STX17,HLA-DPB1,SEC31B,F5,SEC13,VTI1A,CNIH4,DDHD2,SEC22B,PDCD6,CNIH,SEC23A,B2M,MCFD2,SAR1A,SURF4,HLA-DRB5,SEC24C,VTI1B,TMED5,TMED2,KLHL12,APP,TEX261,ERGIC1,CTSZ,SAR1B,HLA-A,SEC24D,SEC31A,SREBF2,SEC23IP,LMAN2L,TGFA,IER3IP1,SEC24A,ERGIC2,YIF1B,ERGIC3,HLA-B,TMED1,TMED3,YIF1A,PEF1,STX5,LMAN2
GO:CC	acetyltransferase complex	GO:1902493	FALSE	0.0017565539210629864	2.7553385140981534	103	6316	51	22149	MORF4L2,TAF12,DR1,TADA3,EPC2,TRRAP,EP400,HCFC1,ENY2,ING3,Q16594,MORF4L1,NAA50,KAT2A,TAF10,TAF7,KANSL3,MCRS1,BRD1,TAF9B,MSL1,ACTB,ING5,NAA11,EPC1,MAP3K7,KAT6A,ACTG1,POTEE,DMAP1,TAF6,USP22,RUVBL2,TAF5,MSL3,TAF4,SF3B3,NAA30,KAT5,MSL2,PHF20L1,ZZZ3,WDR5,ATXN7L3,TADA1,POLE4,SF3B5,NAA38,NAA10,SGF29,ING4
GO:CC	methyltransferase complex	GO:0034708	FALSE	0.0017565539210629864	2.7553385140981534	103	6316	51	22149	CBX5,SENP3,HCFC1,MEN1,SUZ12,HDAC2,WDR82,Q16594,MAX,ASH2L,TAF7,WDR77,MCRS1,ZNF335,SNRPG,SNRPE,JARID2,N6AMT1,DPY30,METTL1,RBM15,FUT6,MGA,PELP1,LAS1L,SETD1A,TAF6,NCOA6,RUVBL2,TAF4,SNRPB,SIRT1,CHD8,WDR4,HSD17B10,DIDO1,AEBP2,WDR5,RBBP4,RNF2,TRMT6,RBM15B,CBLL1,KDM6A,RBBP7,SNRPD2,TRMT61A,PHF1,ERH,PRMT1,SNRPF
GO:CC	cytoplasmic side of membrane	GO:0098562	FALSE	0.001934809477349039	2.7133617939576005	210	6316	90	22149	PGM5,PTPN4,G6PD,GNB1,CHUK,GNAI2,SAMD10,PTPRC,GNAI3,TRAF6,ANK1,GNA13,IQGAP1,JAK2,LYN,LDLRAP1,RAB21,LRRK2,FADD,EPB41,SNX18,CHMP7,ITPR3,GNG8,MIEN1,LILRB4,SYAP1,AP2B1,PTEN,OSBPL2,S100A6,TRAF3IP2,STAC3,RAB5A,EPM2AIP1,DNAJA3,SLC4A1,CFP,FES,GNB4,GNG2,GNAQ,IKBKB,TRAF1,RGS2,GNG10,SNAPIN,GNB5,GNG3,CDH1,GNG5,KRAS,SPPL2A,PTPN7,HCK,PTP4A1,KCNAB2,GNAZ,SPTA1,CNR2,AJAP1,GEM,PTPN3,CHMP4A,GNB3,ASPSCR1,JAK1,TRAF2,P…
GO:CC	RNA polymerase II transcription regulator complex	GO:0090575	FALSE	0.002022151534074269	2.6941863027774637	256	6316	106	22149	MAFG,CEBPA,TCF4,CEBPE,MED21,JDP2,MYC,STAT4,TAF12,CDK7,DR1,CBX3,TADA3,CCNH,TCF7,TRRAP,HMGA1,GTF2A1,NFIL3,RB1,HYAL2,MED1,NPAS2,ENY2,TBPL1,TRIM28,STAT5B,BCL9L,RXRA,Q16594,PYGO2,MAX,ING2,CTNNB1,NFYC,KAT2A,TAF10,NR1H4,MED11,TAF7,MED23,ASCL2,JUND,BACH1,FOSL2,MED26,MED30,NFE2,CEBPB,VDR,DBP,E2F3,ATF1,BACH2,CREB1,SMAD3,MED8,MED15,GTF2A2,TAF9B,RARA,NR1H3,THRA,MXD3,TAF4B,GTF2H1,MAFB,ASCL1,NFYA,E2F5,ERCC3,SM…
GO:CC	cytosolic small ribosomal subunit	GO:0022627	FALSE	0.00224469759542771	2.648842158662077	42	6316	26	22149	RPS3A,RPS27L,RPS7,DHX29,FAU,RPS14,RPS27,RPS20,RPS28,RPS29,RPSA,RPS3,RPS5,RPS2,RPS21,RPS11,RPS6,RPS16,RPS15,RPS19,RPS23,RPS9,RACK1,RPS27A,RPS8,RPS15A
GO:CC	membraneless organelle	GO:0043228	FALSE	0.002314487922613917	2.6355450810966885	6670	6316	2037	22149	FAM110B,TDRD9,HK2,CKAP4,PYHIN1,RPL9,RORA,KLHL20,KCNE1,CCT2,KLF12,TSHZ3,XPO1,CLEC3B,S100A12,PNPLA2,EVL,NARF,HSPH1,BCL7A,CSRP3,HAX1,TNIK,GAS5,PSTPIP2,TUBGCP5,EOMES,TRIM71,MIS18A,ALOX15B,NME7,CDK5R1,SNHG1,CEBPA,GPR174,RPLP0,PGM5,WIPI1,IQCB1,EML6,ATXN1L,KIF3C,RRAGD,CES1,CLIC4,SH2B2,RPS3A,RSPH9,TRIB2,FGD4,KDM7A,PRKACB,IFT56,HSD3B7,MYL9,TNNT1,HINT1,SRPK1,DDX17,UTP20,RPF2,SHTN1,RHOH,RBIS,TCF4,THOC1,TUBE…
[truncated: 130 more rows]
[truncated: 1,085 more columns]
