# Supplementary material
Source: Research Square preprint supplement (doi:10.21203/rs.3.rs-8976053/v1)
Supplement: Supplementary file 15 [file d1e5e49e2e7b307fce0d758a.xlsx]

## Sheet: Sheet1
gene	logFC	AveExpr	t	P.Value	adj.P.Val	B
MRFAP1P1	13.0147	21.7234	5.07651	7.04769e-06	0.283275	3.49365
CRACR2B	204.775	288.851	4.17574	0.000133576	0.961124	0.960522
APOA1	7.04579	7.65957	4.13746	0.000150752	0.961124	0.856441
DHRS4	316.335	852.851	4.01574	0.000220877	0.961124	0.527975
TRBV6-2	3.87363	4	3.98028	0.000246668	0.961124	0.433067
GBGT1	420.049	1396.51	3.97431	0.000251296	0.961124	0.417097
SAT2	828.586	2424.32	3.94919	0.000271672	0.961124	0.350118
TCTE1	5.24542	7.42553	3.91384	0.000303082	0.961124	0.256156
PRSS41	21.5275	26.766	3.89318	0.000323033	0.961124	0.201422
TMEM249	3.34982	3.23404	3.86821	0.000348855	0.961124	0.135413
CLC	4957.94	6714.4	3.79601	0.000435212	0.961124	-0.0543285
CEL	17.0293	37.4681	3.7943	0.000437489	0.961124	-0.0588033
SPNS3	475.57	806.319	3.79066	0.000442373	0.961124	-0.0683214
POLE4	385.247	1076.83	3.76686	0.000475624	0.961124	-0.130452
EPS8L1	28.8278	61.0426	3.74494	0.000508379	0.961124	-0.187528
FZD2	127.544	313.128	3.70324	0.000576782	0.961124	-0.295666
D2HGDH	721.848	1744.51	3.59437	0.000799614	0.961124	-0.57516
ZGLP1	36.2436	88.383	3.57187	0.000854993	0.961124	-0.63239
FOLR2	120.729	293.596	3.56108	0.000882855	0.961124	-0.659788
MPDU1-AS1	61.2894	137	3.53839	0.000944277	0.961124	-0.717234
VAMP8	1476.93	4494.98	3.52071	0.000994948	0.961124	-0.761861
WASH9P	450.299	1166.15	3.51732	0.00100497	0.961124	-0.770415
PRSS36	61.141	180.489	3.51726	0.00100515	0.961124	-0.770568
HSD3B7	51.6136	96.3617	3.51159	0.00102209	0.961124	-0.784836
BANF1P3	23.2088	73.5532	3.48044	0.00112024	0.961124	-0.863069
PROCA1	237.985	677.128	3.47554	0.00113651	0.961124	-0.875361
FAM151A	4.51648	5.21277	3.47255	0.00114651	0.961124	-0.882835
ATOH8	133.804	167.638	3.4436	0.00124797	0.961124	-0.955123
ATP5MF	293.61	904.851	3.41473	0.00135765	0.961124	-1.02689
MBLAC1	19.3736	49.5745	3.40662	0.00139009	0.961124	-1.047
SPAG7	508.128	1725.43	3.40446	0.00139884	0.961124	-1.05234
CEBPE	443.123	769.894	3.39601	0.00143363	0.961124	-1.07326
NHSL1-AS1	44.7821	97.1064	3.3912	0.00145381	0.961124	-1.08516
PRELID1	1194.01	4240.66	3.38272	0.00148998	0.961124	-1.10607
GPBAR1	795.601	2102.6	3.37834	0.00150903	0.961124	-1.11688
LGALS12	411.363	947.277	3.37588	0.00151982	0.961124	-1.12295
VWA5B2	4.81136	7.04255	3.36388	0.00157354	0.961124	-1.1525
MTLN	162.174	347.809	3.34358	0.00166851	0.961124	-1.20234
SLC29A1	1166.86	1780.64	3.33718	0.00169955	0.961124	-1.21801
MYL11	13.5788	26.7021	3.33068	0.0017317	0.961124	-1.23394
TCAP	83.9505	218.298	3.31956	0.00178797	0.961124	-1.26112
SIL1	192.203	558.468	3.30865	0.00184482	0.961124	-1.28771
GSTP1	3650.81	11201.4	3.30803	0.00184813	0.961124	-1.28923
CTU1	131.797	373.766	3.3014	0.00188359	0.961124	-1.30538
GOLGA8UP	-0.52381	0.234043	-3.29985	0.00189197	0.961124	-1.30914
RPL21P93	5.63553	10.2128	3.29521	0.00191725	0.961124	-1.32042
AP2S1	1200.79	3991.94	3.27906	0.00200791	0.961124	-1.35964
NCAM2	2.12271	1.93617	3.27714	0.00201891	0.961124	-1.36428
MRPL40	144.516	440.66	3.27625	0.00202409	0.961124	-1.36645
PSMG3	253.967	898.064	3.2755	0.00202839	0.961124	-1.36826
MIR503HG	10.8901	26.5957	3.24955	0.0021841	0.961124	-1.43101
RENBP	686.665	2235	3.24781	0.0021949	0.961124	-1.43519
INKA1	65.5788	164.468	3.24558	0.00220884	0.961124	-1.44056
TNFSF18	2.24542	1.76596	3.23057	0.00230499	0.961124	-1.47668
ASGR1	268.962	885.787	3.22751	0.0023251	0.961124	-1.48405
CACNG8	120.099	217.723	3.2248	0.002343	0.961124	-1.49055
PRDX5	2460.39	8401.45	3.21549	0.00240561	0.961124	-1.51289
MKRN9P	-3.04029	3.12766	-3.20838	0.00245442	0.961124	-1.52991
SPACDR	20.3297	55.5319	3.19399	0.00255617	0.961124	-1.56431
NDUFB11	1173.58	3277.21	3.19089	0.00257861	0.961124	-1.57171
ATP6V1F	859.881	2911.3	3.18996	0.00258539	0.961124	-1.57394
ANAPC11	478.277	1490.34	3.18973	0.00258705	0.961124	-1.57448
LINC03011	11.9927	30.8723	3.18366	0.0026317	0.961124	-1.58896
FUOM	157.956	412.809	3.17704	0.00268118	0.961124	-1.60473
ATAD3A	274.773	859.383	3.1751	0.00269577	0.961124	-1.60932
APRT	2428.08	7210.38	3.17216	0.00271815	0.961124	-1.61632
PIK3R6	662.46	1580.28	3.16753	0.00275374	0.961124	-1.62733
DHRS4L2	255.212	899.277	3.16721	0.0027562	0.961124	-1.62808
IGF2BP1	-0.285714	0.12766	-3.16276	0.00279087	0.961124	-1.63866
CIAO3	467.59	1458	3.16154	0.00280043	0.961124	-1.64155
RPL10	36880.9	97457	3.15572	0.00284649	0.961124	-1.65535
TMEM219	1500.47	5454.43	3.15213	0.00287526	0.961124	-1.66385
NDUFS5	292.233	827.851	3.15123	0.00288258	0.961124	-1.666
DOK2	3285.58	10977.9	3.14968	0.00289511	0.961124	-1.66967
CRIP1	320.914	834.574	3.14931	0.00289811	0.961124	-1.67055
TMA7	150.626	417.468	3.13957	0.00297814	0.961124	-1.69358
MPND	151.69	504.723	3.13739	0.00299632	0.961124	-1.69872
FITM1	24.13	53.8723	3.1364	0.00300464	0.961124	-1.70106
NTRK1	39.4982	71.6596	3.13548	0.00301238	0.961124	-1.70324
TPRA1	517.837	1795.51	3.13301	0.0030332	0.961124	-1.70906
CACNG6	147.527	239.468	3.11985	0.00314666	0.961124	-1.74009
SLC27A1	523.701	1580.66	3.11943	0.00315034	0.961124	-1.74107
CCS	816.76	2669.87	3.1184	0.00315943	0.961124	-1.74351
PRELID1P1	7.87729	19.5957	3.11682	0.00317335	0.961124	-1.74722
SERPINB6	1545.32	5026.57	3.11565	0.00318372	0.961124	-1.74998
FSTL3	127.077	363.298	3.11455	0.00319341	0.961124	-1.75254
ASB12	4.11722	5.46809	3.11368	0.0032012	0.961124	-1.7546
ASGR2	728.839	1358.43	3.11306	0.00320668	0.961124	-1.75605
TRBC1	1656.46	3238.96	3.11135	0.00322201	0.961124	-1.76008
FAM174C	540.771	1530.34	3.10907	0.0032425	0.961124	-1.76543
DPP7	2611.39	8580.36	3.10769	0.00325499	0.961124	-1.76868
MFSD2A	107.414	318.468	3.10592	0.00327107	0.961124	-1.77283
ANGPTL6	26.0714	70.8511	3.10541	0.0032757	0.961124	-1.77403
MVB12A	423.516	1429	3.10485	0.00328077	0.961124	-1.77534
CRB2	15.8223	27.2766	3.10452	0.00328383	0.961124	-1.77612
TRBV7-2	12.0128	23.9787	3.10279	0.00329962	0.961124	-1.78017
LINC01671	7.93956	10.1064	3.1021	0.00330596	0.961124	-1.78179
STYXL1	554.982	1611.11	3.09937	0.00333112	0.961124	-1.78819
LINC01023	8.08791	24.617	3.09899	0.00333467	0.961124	-1.78909
OR2L1P	-1.1685	0.829787	-3.09752	0.00334832	0.961124	-1.79254
RFNG	602.19	2127.94	3.0965	0.00335775	0.961124	-1.79491
MBD3	810.007	2462.85	3.09486	0.00337312	0.961124	-1.79877
TMSB10	16554.1	51572.8	3.09483	0.00337338	0.961124	-1.79884
ZNF358	103.348	276.362	3.08619	0.00345522	0.961124	-1.81906
EIF3G	2976.79	10412.8	3.0822	0.00349358	0.961124	-1.82838
ADISSP	1082.57	3064.11	3.08038	0.00351118	0.961124	-1.83262
TMEM147	424.984	1367.38	3.07807	0.00353372	0.961124	-1.83802
P2RX6	20.3059	39.0426	3.07797	0.00353469	0.961124	-1.83825
LAMTOR2	615.421	2177.26	3.07151	0.00359841	0.961124	-1.85332
COX4I1	3882.16	13423.3	3.07014	0.00361214	0.961124	-1.85653
PSMB6	814.117	2894.55	3.06697	0.00364387	0.961124	-1.86391
SNHG9	99.7033	232.298	3.06579	0.00365573	0.961124	-1.86665
GEMIN8P4	3.69414	5.23404	3.06388	0.00367508	0.961124	-1.8711
RPS19BP1	713.238	2595.32	3.06356	0.00367835	0.961124	-1.87185
ABCB6	13.3681	34.6809	3.06315	0.00368248	0.961124	-1.87279
TMEM255B	32.5256	76.6596	3.06187	0.0036956	0.961124	-1.87579
TRMT112	1012.01	3525.36	3.06022	0.00371241	0.961124	-1.87962
COPS9	269.057	861.745	3.05741	0.00374134	0.961124	-1.88616
GHDC	692.484	2218.36	3.05469	0.00376949	0.961124	-1.89248
DHRSX	312.304	1021.38	3.04964	0.00382234	0.961124	-1.90422
SEC22B2P	-23.2784	43.1702	-3.04751	0.00384476	0.961124	-1.90914
MRPL52	397.364	1489.72	3.04253	0.0038978	0.961124	-1.92069
ELMO3	160.013	535.851	3.04245	0.00389866	0.961124	-1.92087
BSN-DT	-1.53846	1.14894	-3.0413	0.00391106	0.961124	-1.92355
RPLP1	18350.4	58233.4	3.03463	0.00398341	0.961124	-1.93899
IFI27L2	14.5311	31.2766	3.03416	0.00398861	0.961124	-1.94009
UROD	560.447	2345.51	3.03288	0.00400256	0.961124	-1.94303
TMEM205	264.727	777.064	3.03052	0.00402859	0.961124	-1.94849
AGPAT2	850.696	2856.98	3.03027	0.0040314	0.961124	-1.94907
MRPS34	817.209	2837.79	3.02832	0.00405299	0.961124	-1.95357
COX17	147.516	542.319	3.02801	0.00405643	0.961124	-1.95429
SNHG29	1208.01	3730.6	3.02629	0.00407564	0.961124	-1.95827
MYL6	5306.02	18498	3.02326	0.00410965	0.961124	-1.96526
RPL12P6	8.87729	28.1489	3.01733	0.00417697	0.961124	-1.97894
TMEM258	461.52	1538.4	3.01725	0.00417796	0.961124	-1.97914
GOLT1A	6.48168	6.68085	3.0165	0.00418648	0.961124	-1.98085
RPL3P4	1242.14	3197.81	3.01556	0.0041973	0.961124	-1.98303
OR7E38P	57.2399	208.617	3.01536	0.00419966	0.961124	-1.9835
SNRPD2	888.412	2426.32	3.01087	0.00425149	0.961124	-1.99382
CYP7B1	4.83883	5.91489	3.00816	0.00428319	0.961124	-2.00007
BCRP5	-3.58425	4.25532	-3.00477	0.00432308	0.961124	-2.00787
SERTAD1	321.236	1110.28	3.0043	0.00432863	0.961124	-2.00895
ATF5	305.954	844.489	3.00409	0.00433106	0.961124	-2.00942
MGST1	275.419	786.979	3.00215	0.00435409	0.961124	-2.01389
FIS1	913.352	4043.83	3.002	0.00435586	0.961124	-2.01423
NDUFB2	307.718	1059.89	2.99878	0.00439438	0.961124	-2.02163
UQCRQ	231.643	726	2.99563	0.00443238	0.961124	-2.02888
IGFBP6	16.8938	33.2979	2.99399	0.00445225	0.961124	-2.03264
TOMM7	1088.47	2384.09	2.99011	0.00449954	0.961124	-2.04152
ECE2	54.6795	154.915	2.98571	0.0045539	0.961124	-2.05162
GFI1B	319.271	1149.81	2.98554	0.00455601	0.961124	-2.05201
DENND6B	177.648	585.702	2.9838	0.00457759	0.961124	-2.05598
ZNHIT1	860.804	3045.81	2.98273	0.00459095	0.961124	-2.05843
PUSL1	120.509	412.617	2.9802	0.00462267	0.961124	-2.06422
RPL41	4215.69	9967.28	2.97964	0.0046298	0.961124	-2.06552
ACSM4	1.84799	1.21277	2.97907	0.00463689	0.961124	-2.0668
RNF181	778.819	2749.98	2.97838	0.00464561	0.961124	-2.06838
IL34	35.8022	50.234	2.97587	0.00467751	0.961124	-2.07413
PMVK	430.505	1499.72	2.974	0.00470125	0.961124	-2.07839
YIF1B	695.401	2456.4	2.97262	0.00471903	0.961124	-2.08156
ADORA3	229.026	396.362	2.97242	0.00472158	0.961124	-2.08201
UBL5	977.306	3677.45	2.971	0.00473976	0.961124	-2.08524
EIF4A1P10	195.064	730.574	2.96608	0.00480351	0.961124	-2.09647
NAXE	520.002	1703.85	2.96444	0.00482497	0.961124	-2.10021
RPL21P80	4.14103	6.95745	2.96251	0.0048503	0.961124	-2.10461
TPRN	196.181	648.383	2.96077	0.00487328	0.961124	-2.10858
BNIP3P17	-2.78388	3.93617	-2.96008	0.00488242	0.961124	-2.11015
TXN2	921.108	3533.79	2.9576	0.00491537	0.961124	-2.1158
DGCR6L	587.518	1725.91	2.95728	0.00491956	0.961124	-2.11652
ATP5ME	56.0476	174.957	2.95631	0.00493254	0.961124	-2.11873
ADGRB1	44.9322	132.809	2.95621	0.00493386	0.961124	-2.11895
RNASE2CP	24.0238	45.766	2.95362	0.00496868	0.961124	-2.12486
FAU	3133.84	9630.66	2.95237	0.00498555	0.961124	-2.12771
COX7C	913.599	2390.68	2.9517	0.00499459	0.961124	-2.12923
COX6A1P2	38.7711	130.638	2.95097	0.00500443	0.961124	-2.13088
CAP2	-1.13004	0.851064	-2.94964	0.00502241	0.961124	-2.13389
THOC6	357.874	1269.83	2.94869	0.0050354	0.961124	-2.13606
REEP4	561.626	2102.83	2.94855	0.00503729	0.961124	-2.13637
COA3	276.048	942.66	2.94759	0.00505036	0.961124	-2.13855
C19orf25	747.617	2725.77	2.94344	0.00510746	0.961124	-2.14799
SLC39A4	130.745	325.851	2.9382	0.00518028	0.961124	-2.15987
RIN1	243.551	646.064	2.93813	0.00518125	0.961124	-2.16002
FAM50A	786.744	2967.55	2.93459	0.00523105	0.961124	-2.16805
CD151	797.861	2426.89	2.934	0.00523943	0.961124	-2.16939
TSR3	484.991	1638.34	2.93228	0.00526371	0.961124	-2.17327
CTSD	4728.33	15183.6	2.93145	0.00527557	0.961124	-2.17516
SCGB1B2P	4.75458	8.10638	2.92983	0.00529868	0.961124	-2.17883
ERP29	3352.42	12714.5	2.92841	0.00531899	0.961124	-2.18204
TMPRSS7	-0.494505	0.297872	-2.92768	0.00532951	0.961124	-2.18369
EIF4EBP1	405.877	1234.77	2.92767	0.0053296	0.961124	-2.18371
COMMD4	431.584	1477.51	2.92755	0.00533133	0.961124	-2.18398
BABAM1	336.828	1388.43	2.92674	0.00534302	0.961124	-2.18582
NME3	592.601	1736.3	2.92567	0.00535845	0.961124	-2.18824
TRIR	2572.66	9315.55	2.92358	0.00538873	0.961124	-2.19296
SSNA1	807.725	2904.26	2.92345	0.00539058	0.961124	-2.19325
RNASEH2C	576.945	2134.45	2.92275	0.00540078	0.961124	-2.19483
RPL10P6	-236.555	213.426	-2.91938	0.00544998	0.961124	-2.20244
ERICH6	1.88278	2.85106	2.91792	0.00547147	0.961124	-2.20574
FAM110A	1176.22	3788.53	2.91504	0.005514	0.961124	-2.21223
LYPD1	1.98352	1.38298	2.91439	0.00552364	0.961124	-2.21369
RPLP0P6	722.767	2310.64	2.91256	0.0055509	0.961124	-2.21782
MPDU1	557.817	2228.53	2.91182	0.00556199	0.961124	-2.21949
TMEM221	9.89744	19.8085	2.91082	0.00557697	0.961124	-2.22175
SF3B5	942.108	3171.4	2.91038	0.00558347	0.961124	-2.22272
RCCD1-AS1	4.70696	8.12766	2.9089	0.00560571	0.961124	-2.22606
NUDT14	121.991	435.532	2.90247	0.00570335	0.961124	-2.24053
LY86	754.826	2658.47	2.90199	0.0057107	0.961124	-2.24161
RBPMS2	-98.1392	86.234	-2.8997	0.00574603	0.961124	-2.24677
MIR142HG	2515.52	7317.04	2.89891	0.00575809	0.961124	-2.24853
CHCHD1	231.951	969.17	2.89583	0.00580584	0.961124	-2.25545
ADM5	19.6648	47.0213	2.89506	0.00581784	0.961124	-2.25718
ECI1	300.049	1073.13	2.89414	0.00583235	0.961124	-2.25926
RPS14	11467.7	34692.7	2.89349	0.00584242	0.961124	-2.26071
PTGDR2	808.024	1487.47	2.89065	0.00588713	0.961124	-2.26709
RPS6KA4	1358.21	5146.26	2.89027	0.00589301	0.961124	-2.26793
SHF	24.5806	60.9787	2.88938	0.00590707	0.961124	-2.26993
NR1H3	121.601	379.745	2.88539	0.00597048	0.961124	-2.27887
DPM3	221.229	610.191	2.88325	0.00600479	0.961124	-2.28366
MICOS13	366.736	1101.45	2.88316	0.00600625	0.961124	-2.28387
NENF	237.077	757.149	2.88043	0.00605023	0.961124	-2.28998
MRPL27	216.663	791.809	2.88034	0.00605165	0.961124	-2.29017
ZNF653	67.685	274.681	2.88012	0.00605529	0.961124	-2.29067
SLC66A2	846.068	4146.09	2.87958	0.00606407	0.961124	-2.29189
UQCR10	571.546	2237.94	2.87904	0.00607271	0.961124	-2.29308
DUSP23	284.082	870.723	2.87779	0.00609314	0.961124	-2.29589
SLC47A1	29.8626	53.234	2.87441	0.00614837	0.961124	-2.30344
UBXN11	2829.21	10352.4	2.87335	0.00616573	0.961124	-2.3058
LRMDA	70.8736	221.064	2.8675	0.00626272	0.961124	-2.31886
KDSR-DT	14.1667	36.1702	2.86711	0.00626932	0.961124	-2.31974
MAD2L2	353.734	1357.06	2.86431	0.00631632	0.961124	-2.32599
BAD	116.319	414.489	2.86387	0.00632361	0.961124	-2.32696
LSM7	521.837	1739.72	2.86312	0.00633629	0.961124	-2.32863
BAIAP2L2	29.8864	73.7234	2.8596	0.00639604	0.961124	-2.33648
CHRNA10	67.9377	232.106	2.85936	0.00640007	0.961124	-2.33701
NDUFAF8	125.672	410.426	2.8592	0.00640274	0.961124	-2.33736
ABHD17AP1	19.9762	51.5745	2.85832	0.00641778	0.961124	-2.33932
CST3	7892.42	25922.4	2.85819	0.00642008	0.961124	-2.33962
AKR1A1	1014.81	4021.38	2.85773	0.00642792	0.961124	-2.34064
TMC1	-1.42308	1.21277	-2.85727	0.00643587	0.961124	-2.34167
POLR2L	795.864	2496.17	2.85713	0.00643818	0.961124	-2.34197
ACKR1	49.0201	88.2128	2.85661	0.0064471	0.961124	-2.34313
MRPL14	193.456	672.447	2.85426	0.0064875	0.961124	-2.34836
ROMO1	274.595	739.809	2.85422	0.0064882	0.961124	-2.34845
HCFC1R1	236.44	800.511	2.84974	0.00656599	0.961124	-2.35841
CPHXL	-0.294872	0.170213	-2.84856	0.00658663	0.961124	-2.36103
MRPL48	138.701	503.681	2.84649	0.006623	0.961124	-2.36564
MAPK8IP2	10.7656	26.5745	2.84483	0.00665221	0.961124	-2.36931
WFIKKN1	35.6777	80.2128	2.84368	0.00667253	0.961124	-2.37186
WNT5B	34.7674	83.0426	2.8426	0.00669171	0.961124	-2.37426
RPL41P5	16.7821	31.617	2.84026	0.00673339	0.961124	-2.37945
ELOB	1714.06	5352.11	2.8397	0.00674341	0.961124	-2.38069
EMX1	-3.03297	3.89362	-2.83929	0.0067507	0.961124	-2.3816
TMEM208	327.038	1176.91	2.83672	0.00679694	0.961124	-2.3873
SELENOW	958.797	3531.26	2.8359	0.00681159	0.961124	-2.3891
CDK5	156.115	580.362	2.83549	0.00681906	0.961124	-2.39001
PIN1	924.484	3320.7	2.83393	0.00684728	0.961124	-2.39346
SLC25A6	7396.32	28865.3	2.83366	0.00685223	0.961124	-2.39407
HP	217.56	388.638	2.83205	0.00688151	0.961124	-2.39763
RPL35	3753.34	9518.36	2.83086	0.00690324	0.961124	-2.40026
THOP1	338.445	1116.51	2.82995	0.00691989	0.961124	-2.40227
ADAP1	633.234	1966.68	2.82952	0.00692786	0.961124	-2.40324
RPL30	4250.73	13460.9	2.82802	0.00695526	0.961124	-2.40653
CLTB	709.081	2812.64	2.82513	0.00700866	0.961124	-2.41292
MZT2A	475.462	1247.02	2.82355	0.00703803	0.961124	-2.41641
IL17RC	82.6538	279.723	2.81918	0.00711993	0.961124	-2.42607
MZT2B	341.94	914.872	2.81709	0.00715924	0.961124	-2.43067
SIGIRR	2895.19	9645.4	2.81677	0.00716536	0.961124	-2.43138
UBXN1	2041.37	8004.13	2.81672	0.00716632	0.961124	-2.43149
RPL3	31649.1	98686.4	2.81595	0.00718092	0.961124	-2.43319
NDUFS3	488.881	1937.06	2.81455	0.0072074	0.961124	-2.43626
GALK1	538.866	1881.19	2.81425	0.00721314	0.961124	-2.43693
PLD3	1999.31	7101	2.81415	0.00721506	0.961124	-2.43715
SNHG19	40.4414	100.277	2.81405	0.00721704	0.961124	-2.43738
PRSS33	885.678	1226.43	2.81381	0.0072215	0.961124	-2.43789
RPUSD1	532.207	1767.94	2.81373	0.00722312	0.961124	-2.43808
COMMD1	128.088	534	2.81355	0.00722645	0.961124	-2.43847
ATP5MG	563.938	2183.49	2.80991	0.00729625	0.961124	-2.44649
LYRM4	203.945	676.106	2.80809	0.00733127	0.961124	-2.45048
SELENOH	326.864	1220.72	2.80781	0.00733686	0.961124	-2.45112
MED16	845.562	3348.23	2.80607	0.00737048	0.961124	-2.45493
HADHBP1	-1.21612	0.851064	-2.80491	0.00739314	0.961124	-2.45749
KRT74	6.26374	6.89362	2.80373	0.00741611	0.961124	-2.46008
NDUFA1	393.83	1449.15	2.80249	0.00744031	0.961124	-2.4628
THAP4	376.573	1418.94	2.80245	0.00744122	0.961124	-2.4629
ORM2	99.3956	284.128	2.80176	0.00745463	0.961124	-2.4644
WDR83OS	692.941	2524.23	2.80076	0.00747434	0.961124	-2.46661
DNAAF1	7.73077	15.2766	2.79951	0.00749895	0.961124	-2.46935
NUDT1	188.918	611.936	2.79894	0.00751033	0.961124	-2.47061
METTL26	749.059	2015.47	2.79752	0.00753829	0.961124	-2.47371
RN7SL448P	0.576923	0.319149	2.79748	0.00753912	0.961124	-2.4738
RAB13	38.9762	170.085	2.79704	0.00754786	0.961124	-2.47477
PLD4	574.753	1719.23	2.79573	0.00757399	0.961124	-2.47765
EMP3	5295.22	18511.1	2.79556	0.00757728	0.961124	-2.47801
KIAA1191P1	-0.238095	0.106383	-2.79541	0.00758036	0.961124	-2.47835
RN7SL260P	-0.238095	0.106383	-2.79541	0.00758036	0.961124	-2.47835
RN7SL488P	-0.238095	0.106383	-2.79541	0.00758036	0.961124	-2.47835
SERPINH1P1	-0.238095	0.106383	-2.79541	0.00758036	0.961124	-2.47835
PRR19	6.54029	13.8085	2.79448	0.00759894	0.961124	-2.48039
ZNF581	479.606	1718.36	2.79365	0.00761557	0.961124	-2.48222
FAAH	256.161	892.468	2.79355	0.00761739	0.961124	-2.48242
ZNF177	-0.569597	0.446809	-2.79327	0.00762319	0.961124	-2.48305
MCRIP1	1028.43	3275.06	2.79311	0.00762634	0.961124	-2.48339
RPL41P1	92.37	219.574	2.79273	0.00763394	0.961124	-2.48423
ASPSCR1	582.912	1963.32	2.79236	0.00764132	0.961124	-2.48503
CD52	3519.52	9499.45	2.79083	0.00767206	0.961124	-2.48838
RNU6-189P	-0.342491	0.191489	-2.79035	0.00768185	0.961124	-2.48944
GPI	1631.14	5375.43	2.78991	0.0076908	0.961124	-2.49041
PDXK	1744.13	6405.17	2.78957	0.00769758	0.961124	-2.49115
PFDN2	175.319	652.128	2.78807	0.00772798	0.961124	-2.49443
TRAPPC6A	519.571	1578.85	2.78694	0.00775092	0.961124	-2.4969
MRPL12	55.7143	150.106	2.78633	0.00776332	0.961124	-2.49823
TEDC1	217.766	756.085	2.78458	0.00779915	0.961124	-2.50207
TMUB1	709.766	2425.26	2.78382	0.00781475	0.961124	-2.50374
KIRREL2	3.05495	4.40426	2.78362	0.00781877	0.961124	-2.50417
NDUFS6	460.54	1568.96	2.78298	0.00783192	0.961124	-2.50557
ABCC6	18.0256	31.6383	2.78203	0.00785153	0.961124	-2.50765
PHPT1	346.498	1116.49	2.78018	0.00788971	0.961124	-2.51169
DEGS2	21.652	57.7872	2.7779	0.00793689	0.961124	-2.51666
RPS27	11653	27549.3	2.7759	0.00797872	0.961124	-2.52104
JOSD2	295.707	955.106	2.7748	0.00800163	0.961124	-2.52343
MOB2	734.119	2909.49	2.77438	0.00801046	0.961124	-2.52435
SPRN	64.3846	213.617	2.77283	0.00804308	0.961124	-2.52773
OLIG1	590.434	1353.77	2.77281	0.00804344	0.961124	-2.52777
ARRDC1	1637.99	5790.55	2.77234	0.0080535	0.961124	-2.52881
MFSD10	1335.55	4699.77	2.77168	0.00806727	0.961124	-2.53023
MCRIP2	323.286	1053.55	2.77108	0.00808006	0.961124	-2.53155
EIF3JP2	-2.25458	1.2766	-2.76904	0.0081233	0.961124	-2.536
ARL2	258.916	747.468	2.76665	0.00817417	0.961124	-2.5412
NDUFB10	816.571	3062.15	2.76575	0.0081935	0.961124	-2.54316
TPI1	4386.1	19039	2.7639	0.00823315	0.961124	-2.54718
RBX1	345.136	1318.02	2.76177	0.00827919	0.961124	-2.55183
NOC4L	316.835	938.128	2.76049	0.00830687	0.961124	-2.5546
ATP5PF	220.299	826.915	2.75952	0.00832813	0.961124	-2.55673
CENPX	231.546	753.851	2.75893	0.00834091	0.961124	-2.55801
MRPL51	389.441	1372.34	2.75864	0.00834721	0.961124	-2.55864
ATP5MJ	327.542	1285.57	2.75846	0.00835113	0.961124	-2.55903
CHCHD2	1682.51	7015.09	2.75838	0.00835294	0.961124	-2.55921
ANKRD24	26.359	71.9149	2.75747	0.00837282	0.961124	-2.56119
ZNF524	497.511	1579.36	2.75694	0.00838431	0.961124	-2.56233
FAM234A	296.051	1086.11	2.75578	0.00840971	0.961124	-2.56485
UBE2D3-AS1	9.52381	29.7447	2.75288	0.00847364	0.961124	-2.57115
HGH1	366.729	1235.68	2.75164	0.00850116	0.961124	-2.57385
ETHE1	233.315	879.83	2.75131	0.00850839	0.961124	-2.57455
BCL7C	222.238	759.702	2.7512	0.00851074	0.961124	-2.57478
RPP25L	345.601	1248.66	2.74926	0.00855406	0.961124	-2.57901
PGLS	1644.96	5735.17	2.74917	0.00855598	0.961124	-2.57919
ULK4P3	-0.399267	0.255319	-2.74876	0.00856523	0.961124	-2.58009
CHADL	6.65385	17.6809	2.74841	0.00857304	0.961124	-2.58085
ECSIT	406.529	1849.94	2.74723	0.00859929	0.961124	-2.58339
TMEM161A	251.87	844.809	2.74687	0.00860738	0.961124	-2.58418
UQCRC1	1715.22	6682.7	2.7465	0.0086157	0.961124	-2.58498
PIDD1	482.095	1671.6	2.74585	0.00863027	0.961124	-2.58639
SLC16A11	32.7326	78.2979	2.74576	0.00863237	0.961124	-2.58659
RPL12	9866.51	38408.8	2.74271	0.0087012	0.961124	-2.59319
AUP1	2124.72	9141.23	2.74234	0.00870961	0.961124	-2.594
ZNF488	1.78755	1.89362	2.74182	0.00872132	0.961124	-2.59511
CCDC22	597.892	2269.51	2.74045	0.00875257	0.961124	-2.59809
PLEKHJ1	762.678	2842.38	2.7391	0.00878324	0.961124	-2.601
CCDC124	500.095	1934.55	2.73799	0.00880861	0.961124	-2.6034
ADGRE1	1657.08	4074.49	2.73796	0.00880934	0.961124	-2.60347
TMEM150A	203.341	815.915	2.73665	0.00883952	0.961124	-2.60631
RPS20	6692.27	21923.9	2.73546	0.00886681	0.961124	-2.60887
CDPF1	131.167	488.894	2.73305	0.00892248	0.961124	-2.61407
RUVBL2	500.317	1939.72	2.73137	0.00896161	0.961124	-2.61771
THAP3	226.249	929.064	2.73105	0.00896903	0.961124	-2.6184
ADAMTSL1	0.269231	0.148936	2.72805	0.00903912	0.961124	-2.62487
PQBP1	645.575	2599.94	2.7278	0.00904499	0.961124	-2.62541
TSSC4	794.035	2901.87	2.72719	0.00905928	0.961124	-2.62672
ARMC6	399.509	1597.96	2.72712	0.00906104	0.961124	-2.62688
SMTN	53.0147	196.851	2.72651	0.00907524	0.961124	-2.62818
NPAS1	5.93223	11.234	2.72648	0.00907598	0.961124	-2.62825
ASTN2	25.9689	74.1277	2.72562	0.00909636	0.961124	-2.63012
PLEKHA4	35.011	85.5106	2.72553	0.00909853	0.961124	-2.63031
TIMM13	352.549	1162.17	2.72199	0.00918242	0.961124	-2.63794
LINC01089	1078.96	3105.06	2.72015	0.0092263	0.961124	-2.6419
NUDT22	409.573	1581.19	2.71947	0.00924261	0.961124	-2.64337
NDUFB7	720.892	2078.55	2.71859	0.0092636	0.961124	-2.64525
RPL11	6324.55	19270.2	2.71791	0.00927997	0.961124	-2.64672
UPK3BL3P	21.8974	69.4468	2.71289	0.0094014	0.961124	-2.65752
RPL29	10636.1	35596.3	2.71262	0.00940803	0.961124	-2.6581
YJU2	347.443	1246.3	2.71216	0.00941903	0.961124	-2.65907
TNFSF12	482.277	1989.55	2.712	0.00942296	0.961124	-2.65942
TP53TG1	25.2399	91.9149	2.71138	0.00943806	0.961124	-2.66075
RPLP0	16474.3	53661.7	2.7103	0.00946452	0.961124	-2.66307
GADD45GIP1	331.339	1031.53	2.71011	0.00946923	0.961124	-2.66349
MDP1	1.71429	2.23404	2.70989	0.00947466	0.961124	-2.66396
LIN7B	38.9322	131.489	2.70981	0.00947655	0.961124	-2.66413
B3GNT3	13.0751	18.0426	2.7098	0.00947669	0.961124	-2.66414
WDR18	361.233	1194.02	2.70974	0.00947829	0.961124	-2.66428
NUP50P1	-3.03846	6.31915	-2.7092	0.00949162	0.961124	-2.66545
CTU2	134.764	504.979	2.70882	0.00950089	0.961124	-2.66626
CYC1	879.828	3532.81	2.70879	0.00950157	0.961124	-2.66632
RPL36AL	1665.07	6830.15	2.70879	0.00950163	0.961124	-2.66632
TMEM150B	209.132	604.404	2.70873	0.009503	0.961124	-2.66644
NAP1L4	252.476	677.191	2.70662	0.00955505	0.961124	-2.67098
PAQR7	219.465	739.787	2.70576	0.00957636	0.961124	-2.67283
PNPLA6	2149.89	8536.26	2.70435	0.00961134	0.961124	-2.67585
ATP5MC2	2952.3	11530.6	2.70347	0.00963302	0.961124	-2.67772
BATF3	55.1795	157.191	2.70175	0.00967604	0.961124	-2.68142
RPH3AL	21.7839	43.5745	2.70026	0.00971327	0.961124	-2.68461
KMT2E-AS1	91.6429	333.553	2.7001	0.00971739	0.961124	-2.68496
NSMCE1	620.85	2256.83	2.69999	0.00971997	0.961124	-2.68518
REX1BD	873.115	2605	2.69962	0.00972942	0.961124	-2.68599
CAMK1	107.093	357.957	2.69468	0.00985403	0.961124	-2.69654
RPS28	9441.95	26664.5	2.69436	0.00986225	0.961124	-2.69724
RPLP0P9	135.544	456.553	2.69306	0.0098952	0.961124	-2.7
NDUFA4	538.06	1724.94	2.69252	0.00990922	0.961124	-2.70118
PSMC1P5	0.917582	0.93617	2.69246	0.0099107	0.961124	-2.7013
RABL6	1187.36	4536.17	2.69244	0.00991113	0.961124	-2.70134
DDX49	546.082	2280.66	2.69174	0.00992915	0.961124	-2.70284
CHRNA5	2.92308	4.61702	2.69137	0.00993858	0.961124	-2.70363
STUB1	331.053	1281.66	2.69126	0.00994144	0.961124	-2.70387
MVD	503.471	1799.47	2.68984	0.00997782	0.961124	-2.7069
CIAO2B	415.912	1599.94	2.68974	0.00998024	0.961124	-2.7071
NOXA1	202.874	520.085	2.68877	0.0100054	0.961124	-2.70919
OST4	1042.87	4453.77	2.68704	0.01005	0.961124	-2.71288
RNU6-516P	7.13919	12.4255	2.68631	0.0100688	0.961124	-2.71443
RPL6P10	70.0897	206.106	2.68397	0.0101298	0.961124	-2.71943
NDUFS8	637.179	2338.15	2.68364	0.0101382	0.961124	-2.72012
COX5B	1335.92	4873.26	2.68265	0.0101642	0.961124	-2.72224
FIBP	680.658	2695.91	2.6813	0.0101994	0.961124	-2.72512
EDF1	2647.96	9706.45	2.67949	0.0102469	0.961124	-2.72896
RCE1	257.864	1023.55	2.67946	0.0102479	0.961124	-2.72905
SPINT2	746.617	2933.21	2.67916	0.0102557	0.961124	-2.72968
TXNRD2	491.799	2037.11	2.67854	0.0102719	0.961124	-2.73099
ANTKMT	206.908	591.936	2.67701	0.0103124	0.961124	-2.73425
SHB	8.06227	16.9362	2.67545	0.010354	0.961124	-2.73758
RPS29	4155.05	10551.9	2.67525	0.0103592	0.961124	-2.738
RPL13AP22	7.72894	17.0851	2.67471	0.0103736	0.961124	-2.73915
AKR7A2	482.201	1719.7	2.67466	0.010375	0.961124	-2.73926
MRPL57	289.568	1101.23	2.67434	0.0103835	0.961124	-2.73994
HNRNPA1P12	1.71429	3.23404	2.67204	0.010445	0.961124	-2.74484
CCDC85B	674.619	1839.57	2.67168	0.0104545	0.961124	-2.74559
NAA38	332.65	993.638	2.6715	0.0104594	0.961124	-2.74598
ERGIC3	1684.48	6963.55	2.67013	0.0104962	0.961124	-2.74888
RPS4XP16	69.4652	128.809	2.66962	0.01051	0.961124	-2.74997
DBX1	1.37729	1	2.66864	0.0105365	0.961124	-2.75206
CUEDC2	576.815	2247.85	2.66848	0.0105407	0.961124	-2.75239
BOP1	467.709	1745.45	2.66391	0.010665	0.961124	-2.7621
EXOSC5	267.143	951.638	2.66388	0.0106657	0.961124	-2.76216
BAX	1305.01	5198.68	2.66234	0.0107079	0.961124	-2.76543
SGTA	917.474	3753.87	2.66226	0.0107101	0.961124	-2.76559
MRPL11	256.745	982.553	2.66128	0.010737	0.961124	-2.76767
NICOL1	106.824	242.809	2.66079	0.0107505	0.961124	-2.76872
MFSD12	949.388	3515.57	2.65898	0.0108004	0.961124	-2.77255
RPL13	36728.2	102425	2.65844	0.0108154	0.961124	-2.7737
GOLGA2P8	-1.17766	0.87234	-2.65834	0.010818	0.961124	-2.77389
RPSA	14590.8	46284.2	2.65741	0.0108439	0.961124	-2.77588
FXYD5	6091.98	22910.9	2.65736	0.0108452	0.961124	-2.77598
RPL7P17	4.02198	6.51064	2.65726	0.0108482	0.961124	-2.7762
PARD6A	81.348	276.191	2.65558	0.0108948	0.961124	-2.77975
ATP6V0E1	3066.37	14748.6	2.65306	0.0109651	0.961124	-2.78508
SSR2	3435.05	14978.4	2.65305	0.0109655	0.961124	-2.78511
GPR137	301.83	1231.26	2.65298	0.0109674	0.961124	-2.78525
PPIA	5619.06	23168.7	2.65239	0.0109839	0.961124	-2.7865
RPL6P19	48.4414	183.702	2.65104	0.011022	0.961124	-2.78936
FXYD6	62.5989	200.915	2.64729	0.0111281	0.961124	-2.79729
BGLAP	24.2308	54.4043	2.64713	0.0111325	0.961124	-2.79762
RPSAP12	73.0073	222.149	2.64695	0.0111377	0.961124	-2.798
FAAP20	591.233	2178.26	2.6465	0.0111503	0.961124	-2.79894
PSPN	55.1062	212.532	2.64636	0.0111543	0.961124	-2.79924
EFNB2	8.2674	17.383	2.64518	0.0111881	0.961124	-2.80174
RAB25	13.6593	31.1277	2.64426	0.0112144	0.961124	-2.80368
CAMSAP1-DT	9.82967	26.7234	2.6418	0.011285	0.961124	-2.80887
C1orf122	226.484	839.574	2.64097	0.0113088	0.961124	-2.81062
BRK1	1401.99	6893	2.64026	0.0113295	0.961124	-2.81213
SELENOKP3	1.38828	1.14894	2.63764	0.0114052	0.961124	-2.81764
AIP	1734.25	6357.85	2.63762	0.0114058	0.961124	-2.81768
COX7A2	499.711	1896.34	2.63665	0.0114339	0.961124	-2.81972
SAC3D1	94.7106	334.298	2.63664	0.0114344	0.961124	-2.81975
RPL13AP5	972.993	2919.49	2.63643	0.0114406	0.961124	-2.8202
TAFAZZIN	1229.55	4904.51	2.63591	0.0114556	0.961124	-2.82128
SYT1	5.39011	6.55319	2.63541	0.0114701	0.961124	-2.82233
ROGDI	589.154	2733.91	2.63443	0.011499	0.961124	-2.82441
RHOXF1P3	9.38278	17	2.6341	0.0115084	0.961124	-2.82508
R3HCC1	368.615	1533.91	2.63333	0.0115312	0.961124	-2.82672
POLR2I	41.7747	105.681	2.63127	0.0115918	0.961124	-2.83106
LAMB2P1	61.6502	180.723	2.62834	0.0116785	0.961124	-2.83721
TMEM191A	74.4799	267.106	2.62778	0.0116952	0.961124	-2.8384
SLC4A9	2.60073	4.91489	2.62682	0.0117235	0.961124	-2.84039
FASTK	1271.14	4916.85	2.62653	0.0117324	0.961124	-2.84102
HDAC10	61.0586	216.872	2.62649	0.0117334	0.961124	-2.84109
EIF3I	1260.33	5409.68	2.62616	0.0117432	0.961124	-2.84178
RPS3	18361.5	62595.2	2.62541	0.0117656	0.961124	-2.84335
IDH3G	1006.03	3996.19	2.62503	0.0117771	0.961124	-2.84417
EIF6	663.119	2508.21	2.62442	0.0117953	0.961124	-2.84544
AKT1S1	340.592	1760.94	2.62299	0.0118382	0.961124	-2.84844
DAGLB	681.958	2745.87	2.6223	0.011859	0.961124	-2.84989
HES6	39.4615	125.83	2.62149	0.0118836	0.961124	-2.8516
ATP5F1D	1075.84	3539.38	2.62015	0.011924	0.961124	-2.85441
NT5C	270.938	928.404	2.62002	0.0119277	0.961124	-2.85466
ZNF385A	1947.77	7133.11	2.61996	0.0119297	0.961124	-2.8548
EPN1	1670.49	7088.34	2.61827	0.0119809	0.961124	-2.85834
GAGE10	3.08425	3.46809	2.6182	0.0119831	0.961124	-2.85849
MIR3162	0.298535	0.212766	2.61672	0.0120283	0.961124	-2.8616
NAA10	435.597	1552.06	2.61552	0.012065	0.961124	-2.86411
STAP2	15.7729	48.1064	2.61521	0.0120742	0.961124	-2.86474
LINC01115	-0.580586	0.297872	-2.61429	0.0121024	0.961124	-2.86667
CAPG	2873.43	9122.94	2.61426	0.0121034	0.961124	-2.86674
FBXL15	308.414	968.66	2.61356	0.0121248	0.961124	-2.8682
MRPS18A	102.181	435.383	2.61212	0.0121693	0.961124	-2.87123
ZNF511	96.0092	373.064	2.60996	0.0122359	0.961124	-2.87573
LINC01781	27.1245	53.9574	2.60832	0.0122868	0.961124	-2.87916
ASB2	14.5971	23.1702	2.60816	0.0122918	0.961124	-2.8795
ARFRP1	934.476	3762.47	2.60807	0.0122948	0.961124	-2.8797
PELO-AS1	0.68315	0.425532	2.60745	0.0123139	0.961124	-2.88098
SLC38A6	62.163	235.34	2.6071	0.0123248	0.961124	-2.88171
H2AZ2P1	20.1044	71.9787	2.60561	0.0123716	0.961124	-2.88484
ABHD12	309.625	1187.23	2.60532	0.0123805	0.961124	-2.88543
SLC39A3	222.189	846.532	2.60472	0.0123994	0.961124	-2.88669
MAP4K1	222.712	647.298	2.60418	0.0124164	0.961124	-2.88782
HLA-B	38324.1	50433.8	2.60319	0.0124475	0.961124	-2.88988
RPS4XP13	130.341	156.532	2.60225	0.012477	0.961124	-2.89184
RPL13A	25691.6	85539	2.60159	0.0124981	0.961124	-2.89323
NUDT8	16.3095	45.2128	2.60146	0.012502	0.961124	-2.89349
TEX264	879.24	3440.34	2.60135	0.0125057	0.961124	-2.89373
TIMM17B	638.004	2416.32	2.59948	0.0125648	0.961124	-2.89763
AURKAIP1	1154.88	4388.91	2.59843	0.0125983	0.961124	-2.89982
RPS5	10299.8	28696.6	2.59842	0.0125984	0.961124	-2.89983
PLAAT5	36.8168	66.3191	2.59795	0.0126134	0.961124	-2.90081
RPL34P18	15.6832	27.7234	2.59791	0.0126148	0.961124	-2.9009
RPS2	24997.2	86742.1	2.5979	0.0126151	0.961124	-2.90092
RFXANK	480.313	2023.28	2.59671	0.0126531	0.961124	-2.9034
KRT18	49.0348	128.745	2.59598	0.0126763	0.961124	-2.90492
CIDECP1	156.531	778.83	2.59594	0.0126776	0.961124	-2.905
TNFRSF14-AS1	14.544	33.617	2.59549	0.0126921	0.961124	-2.90595
LINC01703	-1.86264	2.25532	-2.59545	0.0126934	0.961124	-2.90603
VENTX	340.026	1173.77	2.59519	0.0127015	0.961124	-2.90656
PRH1	-0.333333	0.148936	-2.59516	0.0127026	0.961124	-2.90663
CTSH	2424.69	9530.94	2.59516	0.0127026	0.961124	-2.90663
RANGAP1	1444.11	5307.3	2.59397	0.0127409	0.961124	-2.90911
DNAJB2	1425.97	6258.21	2.59393	0.0127421	0.961124	-2.90918
EXOSC4	85.9304	296.298	2.59384	0.0127452	0.961124	-2.90939
KCNT2	-0.809524	0.361702	-2.59238	0.0127922	0.962674	-2.91242
CHID1	340.993	1495.87	2.59141	0.0128234	0.962674	-2.91444
PSMC5	1158.85	4690.45	2.58922	0.0128944	0.962674	-2.91898
PAFAH1B3	153.158	491.106	2.58914	0.0128969	0.962674	-2.91914
GPR160P1	11.0092	14.0426	2.58895	0.0129031	0.962674	-2.91954
RPL18A	16699.4	47477.1	2.58771	0.0129437	0.962674	-2.92213
PSMC3	669.973	2830.77	2.58718	0.012961	0.962674	-2.92323
RPL8	14943.9	53939.4	2.58698	0.0129675	0.962674	-2.92365
SDHAF2	166.299	720.043	2.58656	0.0129813	0.962674	-2.92452
RPL6P27	492.846	1676.64	2.5857	0.0130093	0.962979	-2.9263
PPP3R2	-2.31136	3.34043	-2.58382	0.013071	0.965764	-2.9302
RPL18	14299.6	44400.1	2.58194	0.0131332	0.9658	-2.93412
TMED1	80.7546	350.149	2.58105	0.0131625	0.9658	-2.93596
UQCRH	361.7	1509.85	2.58035	0.0131857	0.9658	-2.93741
COX6B1	2159.07	8187.81	2.58019	0.0131911	0.9658	-2.93774
LINC02195	2.15751	1.57447	2.58017	0.0131916	0.9658	-2.93777
DDRGK1	450.615	1923.28	2.57635	0.0133192	0.969309	-2.9457
RPL41P2	0.851648	1.04255	2.57474	0.013373	0.969309	-2.94903
MIR3681HG	1.0641	1.25532	2.57429	0.0133881	0.969309	-2.94996
NUDCP1	0.875458	0.531915	2.57368	0.0134087	0.969309	-2.95122
LMF1-AS1	3.87546	5.19149	2.57226	0.0134568	0.969309	-2.95417
PNKD	812.418	2994.85	2.57197	0.0134664	0.969309	-2.95476
JTB	1568.14	8042.77	2.57187	0.0134697	0.969309	-2.95497
BANF1	978.971	3974.51	2.57124	0.0134913	0.969309	-2.95628
UBALD1	555.341	2284.64	2.57086	0.0135042	0.969309	-2.95707
GFER	125.244	488.617	2.57042	0.0135192	0.969309	-2.95799
PSLNR	-0.923077	0.489362	-2.56887	0.0135717	0.969309	-2.96118
CYTOR	137.134	431.766	2.56601	0.0136695	0.969309	-2.96709
RPS10P3	45.848	100.553	2.56585	0.0136751	0.969309	-2.96743
CKAP2L	-14.0201	21.1489	-2.5654	0.0136905	0.969309	-2.96836
TFF3	18.6447	33.3617	2.56527	0.013695	0.969309	-2.96863
MPG	211.969	904.021	2.56521	0.0136971	0.969309	-2.96875
RPL37	6741.03	23433.1	2.56452	0.0137207	0.969309	-2.97017
HSD17B10	680.623	2732.28	2.56443	0.0137239	0.969309	-2.97036
SIVA1	684.348	2824.77	2.56401	0.0137384	0.969309	-2.97123
SSR4	1864.14	6345.51	2.56327	0.0137638	0.969309	-2.97275
SNORD99	11.2473	34.9362	2.56224	0.0137995	0.969309	-2.97488
RPS27P3	1752.99	4078.4	2.56215	0.0138024	0.969309	-2.97506
LAMTOR4	2827.98	10803.7	2.55891	0.0139149	0.969309	-2.98174
URB1-AS1	18.0092	57.9149	2.55819	0.0139402	0.969309	-2.98323
SCAND1	617.386	2117.72	2.5578	0.0139538	0.969309	-2.98404
TMEM101	364.057	1521.3	2.55742	0.0139669	0.969309	-2.98481
KLHDC8B	588.377	1344.72	2.55657	0.0139967	0.969309	-2.98657
RPS21	2745.09	7237.7	2.55601	0.0140164	0.969309	-2.98772
ANO9	1070.99	3970.13	2.55489	0.0140556	0.969309	-2.99002
COX14	142.004	468.936	2.55475	0.0140608	0.969309	-2.99032
CATSPER1	84.2546	300.085	2.55391	0.0140904	0.969309	-2.99205
CHST13	246.67	518.17	2.5536	0.0141012	0.969309	-2.99269
TSTD1	416.608	1672.7	2.55287	0.014127	0.969309	-2.99419
MIR6859-1	22.7784	66.5532	2.55284	0.0141281	0.969309	-2.99426
ARHGEF19	129.656	468.915	2.55279	0.0141299	0.969309	-2.99436
COPE	1821.43	6924.36	2.55195	0.0141595	0.969309	-2.99608
UBE2SP1	5.84432	9.04255	2.55142	0.0141784	0.969309	-2.99718
RNF25	337.963	1344.15	2.55117	0.0141872	0.969309	-2.99769
ABHD14A	82.7198	273.617	2.54907	0.0142617	0.969309	-3.002
LINC02723	59.9139	189.191	2.54795	0.0143017	0.969309	-3.0043
RPS6KB2	791.097	3445.72	2.54597	0.0143726	0.969309	-3.00837
TMEM187	120.255	412	2.54586	0.0143766	0.969309	-3.0086
GPX4	2057.21	8428.32	2.54553	0.0143887	0.969309	-3.00929
NTMT1	117.571	511.468	2.54456	0.0144233	0.969309	-3.01127
COL9A2	488.304	1563.74	2.54439	0.0144297	0.969309	-3.01163
RPL6	6550.26	24373.8	2.54264	0.0144926	0.969309	-3.01521
RPL6P4	-1.36813	0.957447	-2.54235	0.0145033	0.969309	-3.01581
PPIAP22	212.56	855.872	2.54161	0.01453	0.969309	-3.01733
OCEL1	309.694	1287.51	2.54124	0.0145435	0.969309	-3.01809
ATG101	169.791	665.213	2.54102	0.0145515	0.969309	-3.01854
ARL6IP4	22.0348	63.8085	2.54029	0.0145779	0.969309	-3.02003
TMEM86B	135.352	485.447	2.53941	0.0146101	0.969309	-3.02185
NUBP2	807.584	3045.51	2.53939	0.0146106	0.969309	-3.02187
MFSD3	123.357	426.383	2.53856	0.0146411	0.969309	-3.02359
MRPL54	396.242	1283.34	2.53851	0.0146427	0.969309	-3.02368
CBR1	335.269	1106.47	2.53629	0.014724	0.969309	-3.02823
NAGPA	390.626	1643.23	2.53472	0.0147818	0.969309	-3.03145
TAF10	1011.95	4665.09	2.53166	0.014895	0.969309	-3.03772
BRICD5	244.306	828.957	2.53151	0.0149005	0.969309	-3.03802
FKBP4	627.491	2286.17	2.53127	0.0149095	0.969309	-3.03852
MRPL41	590.176	1656.77	2.5302	0.0149491	0.969309	-3.0407
CCDC159	648.106	2575.57	2.52996	0.0149581	0.969309	-3.04119
B3GAT3	898.85	3187.62	2.52962	0.0149707	0.969309	-3.04189
OBSL1	18.5879	38.4255	2.52887	0.0149988	0.969309	-3.04342
LRRC45	241.925	955.021	2.52879	0.0150018	0.969309	-3.04359
MS4A3	156.278	381.404	2.5284	0.0150161	0.969309	-3.04437
PHB1	418.22	1696.21	2.52834	0.0150185	0.969309	-3.0445
SLC22A20P	13.2308	30.3191	2.52738	0.0150544	0.969309	-3.04647
SMPD3	912.546	1982.57	2.52686	0.0150739	0.969309	-3.04753
HEY2	5.77839	10.1489	2.52679	0.0150766	0.969309	-3.04768
LGALS1	2617.16	9368.98	2.52627	0.0150958	0.969309	-3.04872
STX8	198.344	898.532	2.52533	0.0151312	0.969309	-3.05065
GRHPR	634.348	2388.11	2.524	0.0151814	0.969309	-3.05337
SNRNP25	144.308	596.83	2.52202	0.0152564	0.969309	-3.05741
RN7SL589P	1.44139	1.70213	2.5216	0.0152721	0.969309	-3.05826
RAC3	14.2509	42.9787	2.52084	0.0153011	0.969309	-3.05981
PFDN5	1606.99	6696.02	2.51984	0.0153391	0.969309	-3.06185
UQCC3	45.7967	172.191	2.51838	0.0153947	0.969309	-3.06482
CD320	380.339	1164.64	2.5183	0.015398	0.969309	-3.065
CCR5AS	23.0256	63.4043	2.51812	0.0154048	0.969309	-3.06536
FKBP2	533.3	1992.26	2.51802	0.0154087	0.969309	-3.06557
MLST8	319.148	1200.98	2.51794	0.0154115	0.969309	-3.06572
TRMT61A	272.311	981.021	2.51786	0.0154146	0.969309	-3.06588
MT1F	97.9945	264.638	2.51752	0.0154278	0.969309	-3.06659
MRPL55	318.641	1142.94	2.51739	0.0154325	0.969309	-3.06684
ATP5MK	185.031	799.596	2.51677	0.0154566	0.969309	-3.06812
GPAA1	929.321	3778.43	2.51609	0.0154825	0.969309	-3.06949
F12	57.3773	172.979	2.51314	0.0155963	0.969309	-3.0755
ZNF688	269.463	981.255	2.51289	0.015606	0.969309	-3.07601
RPL21P11	5.51465	13.5745	2.51214	0.0156348	0.969309	-3.07753
RAPSN	17.1026	56.1277	2.51212	0.0156358	0.969309	-3.07758
CA12	-5.21245	11.0213	-2.51155	0.0156578	0.969309	-3.07873
CLEC1A	51.5952	171.447	2.51094	0.0156817	0.969309	-3.07998
HAX1	818.676	3591.17	2.51083	0.0156859	0.969309	-3.0802
GNA15	435.575	1594.77	2.51017	0.0157116	0.969309	-3.08155
LYPLA2	1297.6	5301.11	2.50929	0.0157459	0.969309	-3.08333
RPL10P9	-3247.93	4605.13	-2.50888	0.0157617	0.969309	-3.08416
C19orf53	708.811	2390.49	2.50741	0.0158193	0.969309	-3.08715
RPL27A	9645.15	33021.9	2.50735	0.0158218	0.969309	-3.08728
PCGF1	205.515	831.213	2.50682	0.0158425	0.969309	-3.08836
BACE2	195.392	597.851	2.50658	0.0158519	0.969309	-3.08884
PIGQ	449.386	1732.79	2.50632	0.0158622	0.969309	-3.08937
ZNRD2	199.403	773.213	2.50599	0.0158748	0.969309	-3.09003
ALG3	389.355	1485.34	2.50597	0.0158756	0.969309	-3.09006
COX16	19.0366	67.3404	2.50551	0.0158938	0.969309	-3.09101
PARL	67.7363	275.043	2.50544	0.0158967	0.969309	-3.09116
MRPL2	272.128	1026.87	2.50518	0.0159068	0.969309	-3.09168
C1orf159	244.156	920.255	2.50345	0.0159751	0.969309	-3.09519
RPS11	15557.5	60027.3	2.5034	0.0159772	0.969309	-3.0953
SGF29	396.148	1395.57	2.50316	0.0159866	0.969309	-3.09578
LINC00887	-1.48168	1.08511	-2.50286	0.0159985	0.969309	-3.09639
NAPA-AS1	13.859	45	2.50262	0.0160078	0.969309	-3.09687
STAC3	271.337	942.149	2.50254	0.0160111	0.969309	-3.09703
FBXW5	2253.76	9912.43	2.50222	0.0160238	0.969309	-3.09769
HMGB1P1	1.27656	1.46809	2.50216	0.0160262	0.969309	-3.09781
RPS6	10757.6	36931.9	2.50148	0.0160531	0.969309	-3.09919
TNFRSF18	154.112	415.872	2.50018	0.0161047	0.969309	-3.10182
SWI5	99.4377	445.532	2.49956	0.0161296	0.969309	-3.10308
EREG	22.5733	39.1064	2.49936	0.0161375	0.969309	-3.10349
RRAD	9.26007	12.1702	2.49808	0.0161885	0.969309	-3.10607
SNRPB	1486.43	6017.04	2.49788	0.0161966	0.969309	-3.10648
UBE2SP2	3.16117	6.51064	2.49779	0.0162002	0.969309	-3.10667
EFNA3	20.5952	73.2979	2.49656	0.0162495	0.969309	-3.10916
RPL19	17089	63375	2.49609	0.0162683	0.969309	-3.1101
MRPL21	189.896	754.191	2.49445	0.0163342	0.969309	-3.11342
TMED3	466.187	1909.32	2.49435	0.0163384	0.969309	-3.11363
ENG	433.577	1547.85	2.49399	0.0163529	0.969309	-3.11436
TRIM52-AS1	158.582	549.298	2.49338	0.0163776	0.969309	-3.1156
MOXD2P	-0.342491	0.191489	-2.49313	0.0163875	0.969309	-3.11609
DMTF1-AS1	5.73626	16.7447	2.49272	0.0164044	0.969309	-3.11694
CARD9	491.753	1946.32	2.49201	0.016433	0.969309	-3.11836
MRPS15	294.89	1358.7	2.49116	0.0164676	0.969309	-3.12008
SNORD104	44.6282	84.0213	2.49059	0.0164907	0.969309	-3.12123
RPL12P4	98.0495	391.383	2.49038	0.0164993	0.969309	-3.12166
NEDD8	405.69	1917.23	2.48996	0.0165165	0.969309	-3.12251
SERGEF	125.216	483.745	2.48937	0.0165402	0.969309	-3.12369
RPS9P2	334.374	842.83	2.48876	0.0165652	0.969309	-3.12493
RPL36	5162.6	16395.8	2.48871	0.0165675	0.969309	-3.12504
LINC01341	5.54396	12.6383	2.48576	0.0166882	0.97414	-3.13099
SKINT1L	1.72344	2.19149	2.48489	0.0167242	0.97414	-3.13275
PPDPF	2690.92	8643.83	2.48425	0.0167505	0.97414	-3.13404
RPL39P3	156.233	407.617	2.48375	0.0167709	0.97414	-3.13504
IDUA	271.656	1091.47	2.48321	0.0167935	0.97414	-3.13614
RPL24	2559.85	9628.28	2.48316	0.0167955	0.97414	-3.13624
EBP	329.075	1263.85	2.48112	0.0168801	0.976932	-3.14035
ZBTB42	148.65	508.851	2.48083	0.0168923	0.976932	-3.14094
ADCK5	171.295	704.426	2.48	0.0169266	0.977509	-3.1426
BBLN	1180.62	3795.3	2.47911	0.0169637	0.978246	-3.1444
RPS16	9319.6	30653.4	2.47816	0.0170034	0.97913	-3.14631
BRD2	295.086	418.191	2.47742	0.0170344	0.979288	-3.1478
AIFM3	86.6136	336.723	2.47669	0.0170652	0.979288	-3.14928
CENPB	929.767	3970.15	2.47635	0.0170792	0.979288	-3.14995
PICK1	279.183	1158.49	2.47558	0.0171117	0.979755	-3.15151
TRMT112P6	11.956	33.0426	2.4743	0.0171654	0.981429	-3.15407
LYSMD1	120.48	459.553	2.47355	0.0171971	0.981847	-3.15559
PHKG2	803.04	3361.43	2.47287	0.0172261	0.982105	-3.15696
CRTAP	1494.32	7325.79	2.47176	0.0172729	0.982462	-3.15919
CD276	2.24908	3.14894	2.47137	0.0172894	0.982462	-3.15997
EMX2OS	2.72344	2.74468	2.47013	0.0173421	0.982462	-3.16246
GNPTG	638.108	3085.23	2.46987	0.0173535	0.982462	-3.163
HIGD2A	658.366	2483.3	2.46941	0.0173728	0.982462	-3.16391
GTPBP6	904.872	3570.23	2.46909	0.0173868	0.982462	-3.16456
SYNGR2	2449.34	11628.8	2.4687	0.0174034	0.982462	-3.16535
ARPC4	3918.28	15400.1	2.46694	0.0174784	0.984372	-3.16887
GNB1L	94.5183	341.191	2.4649	0.0175662	0.984372	-3.17297
ATF7-NPFF	25.1484	78.3404	2.4641	0.0176007	0.984372	-3.17457
NDUFB4P11	3.35531	5.80851	2.46388	0.0176104	0.984372	-3.17502
RPS15	9176.42	29424.6	2.46371	0.0176176	0.984372	-3.17536
FBXO44	513.786	2021.94	2.46218	0.017684	0.984372	-3.17843
ATRAID	684.881	3085.49	2.46197	0.0176929	0.984372	-3.17884
WASHC1	588.526	1362.23	2.46194	0.0176944	0.984372	-3.17891
DIP2C-AS1	0.230769	0.12766	2.46167	0.0177061	0.984372	-3.17945
WBP11P1	0.230769	0.12766	2.46167	0.0177061	0.984372	-3.17945
RPL18AP3	1357.33	3874.34	2.46126	0.0177235	0.984372	-3.18026
KCNK6	840.91	3485.85	2.46091	0.0177389	0.984372	-3.18097
DTYMK	163.692	661.553	2.46038	0.017762	0.984372	-3.18203
WRAP53	233.559	975.298	2.45981	0.017787	0.984372	-3.18318
PTRHD1	65.9231	235.468	2.4594	0.0178046	0.984372	-3.18399
NOP53	9918.98	30696	2.45719	0.0179014	0.986262	-3.18842
SNRPE	143.822	532.085	2.45621	0.0179441	0.986262	-3.19037
RPL21P75	23.7564	80.8085	2.45605	0.0179513	0.986262	-3.1907
ATP5F1E	1709.82	8389.62	2.45567	0.017968	0.986262	-3.19146
RPS27P19	16.381	40.6809	2.4547	0.0180108	0.986262	-3.1934
BCAP31	2517.58	11381.1	2.4545	0.0180193	0.986262	-3.19379
RPL35A	2728.05	10063.9	2.45423	0.0180313	0.986262	-3.19433
RPL32	10703.9	38715.4	2.45415	0.0180351	0.986262	-3.19451
RPLP2	17954.4	64021.2	2.45329	0.0180728	0.986982	-3.19621
PPP1R16A	97.7894	345.191	2.45234	0.018115	0.987638	-3.19812
MT1E	33.9579	69.4043	2.45191	0.018134	0.987638	-3.19898
TMEM191C	18.5952	56.1915	2.45099	0.0181749	0.988444	-3.20082
ODAD1	25.7692	78.2553	2.45047	0.0181979	0.988444	-3.20185
SELENOO	790.648	3226.81	2.44945	0.0182432	0.989565	-3.20388
ENPP7P11	4.63004	6.08511	2.44872	0.0182757	0.989604	-3.20534
STK32C	243.958	915.574	2.44833	0.0182932	0.989604	-3.20612
SCRN2	346.577	1432.72	2.44707	0.0183499	0.990106	-3.20865
CCDC154	51.4212	192.255	2.44663	0.0183696	0.990106	-3.20953
RNY3P16	1.93407	2.21277	2.44643	0.0183786	0.990106	-3.20993
COX6A1	276.189	1213.4	2.44593	0.018401	0.990106	-3.21092
TMEM160	201.48	568.362	2.44514	0.0184363	0.990672	-3.21249
DSG3	3.31319	4.40426	2.44387	0.0184936	0.990672	-3.21502
VESTAR	34.4396	78.766	2.44355	0.0185081	0.990672	-3.21566
DPY30	129.681	565.596	2.44347	0.0185116	0.990672	-3.21582
CCDC12	448.692	2015.21	2.4421	0.0185739	0.990672	-3.21856
LINC02803	8.69231	24.8085	2.44095	0.018626	0.990672	-3.22085
SIGLEC8	459.174	751.106	2.44091	0.0186276	0.990672	-3.22092
ABHD11	219.004	763.532	2.44043	0.0186494	0.990672	-3.22187
TPI1P2	-5.12271	10.4043	-2.43985	0.018676	0.990672	-3.22304
SNAPC2	274.861	1059.57	2.43847	0.0187386	0.990672	-3.22577
VKORC1	74.6044	305.128	2.43828	0.0187475	0.990672	-3.22616
HINT2	146.104	505.681	2.43676	0.0188171	0.990672	-3.22918
SGCG	-1.32418	1.55319	-2.43616	0.0188446	0.990672	-3.23037
AKIP1	84.7821	369.234	2.43605	0.0188495	0.990672	-3.23059
WDR97	65.8736	170.298	2.43532	0.0188831	0.990672	-3.23204
NANS	349.474	1555.66	2.43511	0.0188929	0.990672	-3.23247
MTCO1P40	-33.0952	26.7872	-2.43297	0.0189914	0.990672	-3.23671
UFC1	604.918	2699.06	2.43256	0.0190105	0.990672	-3.23753
EMC10	964.364	4236.38	2.43239	0.0190182	0.990672	-3.23786
CLDN19	-0.351648	0.234043	-2.43139	0.0190647	0.990672	-3.23986
PRELID1P6	467.22	1713.32	2.43071	0.0190962	0.990672	-3.2412
TRIB1AL	3.14286	3.59574	2.43059	0.019102	0.990672	-3.24145
ORAI1	1188.77	5062	2.42937	0.0191584	0.990672	-3.24385
C1orf127	21.6062	63	2.42901	0.0191755	0.990672	-3.24458
RPS12P24	-1.2674	1.48936	-2.42879	0.0191858	0.990672	-3.24502
TCEA2	254.687	947.319	2.42635	0.0192997	0.990672	-3.24985
CENPT	678.086	2897.06	2.42634	0.0193002	0.990672	-3.24987
MS4A4E	75.3535	301.447	2.42624	0.0193049	0.990672	-3.25007
NPM3	115.899	376.638	2.4261	0.0193114	0.990672	-3.25034
KRT18P28	-0.190476	0.0851064	-2.42549	0.01934	0.990672	-3.25155
LINC01490	-0.190476	0.0851064	-2.42549	0.01934	0.990672	-3.25155
LINC02115	-0.190476	0.0851064	-2.42549	0.01934	0.990672	-3.25155
RPS24P14	-0.190476	0.0851064	-2.42549	0.01934	0.990672	-3.25155
KLC4-AS1	3.10073	5.19149	2.42435	0.0193938	0.990672	-3.25382
KLHDC3	1191.55	5437.87	2.42418	0.0194018	0.990672	-3.25416
SCCPDH	147.636	650.766	2.42391	0.0194147	0.990672	-3.2547
RPL36AP37	220.584	498.787	2.42319	0.0194484	0.990672	-3.25611
CMTM7	1159.86	4851.15	2.42272	0.0194707	0.990672	-3.25705
GCOM1	-2.67399	3.42553	-2.42215	0.0194977	0.990672	-3.25818
RPS19	13714.2	46438.1	2.42166	0.0195209	0.990672	-3.25915
CENPQ	41.3901	100.468	2.41986	0.0196064	0.990672	-3.26271
ALKBH7	611.136	1808.17	2.41973	0.0196124	0.990672	-3.26296
FAR1P1	-2.18681	3.3617	-2.4194	0.0196283	0.990672	-3.26362
EPHX3	5.51465	11.5745	2.41934	0.0196312	0.990672	-3.26374
HNRNPD-DT	9.49267	28.4894	2.41886	0.0196538	0.990672	-3.26468
SDHAF1	202.101	835.277	2.41881	0.0196562	0.990672	-3.26478
TIMM50	371.302	1545.83	2.4186	0.0196665	0.990672	-3.26521
STBD1	12.8114	40.4681	2.41704	0.019741	0.990672	-3.26829
STK16	326.839	1644.04	2.41697	0.0197442	0.990672	-3.26842
EZHIP	6.56593	15.4894	2.41667	0.0197588	0.990672	-3.26902
ATPAF2	200.43	850.638	2.41507	0.0198355	0.990672	-3.27218
RBM42	963.291	4089.17	2.41492	0.0198426	0.990672	-3.27248
MIR4294	1.37179	1.42553	2.41442	0.0198668	0.990672	-3.27347
DBI	369.377	1283.57	2.41396	0.0198887	0.990672	-3.27437
NPC2	1661.41	6984.55	2.41387	0.0198932	0.990672	-3.27455
RPSAP19	245.639	775.362	2.41387	0.0198932	0.990672	-3.27455
H1-7	-9.67582	18.3617	-2.41356	0.0199083	0.990672	-3.27517
OTUB1	1466.37	6509.85	2.41312	0.0199293	0.990672	-3.27603
SERF2	2429.62	11967	2.41277	0.0199464	0.990672	-3.27673
KCNK15-AS1	1.07143	1.02128	2.41248	0.0199603	0.990672	-3.27729
TRPM5	4.24542	8.87234	2.41206	0.0199805	0.990672	-3.27812
EIF4A1P2	8.58059	30.1277	2.41204	0.0199816	0.990672	-3.27816
TRIM28	3506.97	13678.4	2.41203	0.0199821	0.990672	-3.27818
SPR	22.522	83.7447	2.41092	0.0200359	0.990672	-3.28038
AGAP3	550.914	2105.81	2.41056	0.0200532	0.990672	-3.28108
ZNF205	24.0311	69.5319	2.41001	0.0200798	0.990672	-3.28216
TAGLN3	0.994505	0.978723	2.40986	0.0200873	0.990672	-3.28246
NOSIP	3359.22	10395.8	2.40912	0.0201232	0.990672	-3.28392
TSPO	4331.76	16238.3	2.40874	0.0201418	0.990672	-3.28467
PIH1D1	756.099	3230.55	2.40843	0.0201571	0.990672	-3.28529
INSL3	66.2985	189.723	2.40803	0.0201765	0.990672	-3.28607
SERF1A	4.55861	6.61702	2.4077	0.0201926	0.990672	-3.28672
MYG1	381.892	1533.02	2.40723	0.0202156	0.990672	-3.28765
AIF1L	-5.12271	8.40426	-2.40682	0.0202354	0.990672	-3.28845
RNF208	27.5513	79.5745	2.40524	0.020313	0.991406	-3.29157
SYTL1	2945.15	13300.9	2.40421	0.0203636	0.991406	-3.29359
MIIP	724.132	3493.3	2.40414	0.0203672	0.991406	-3.29374
HNRNPKP5	1.28571	1.42553	2.40413	0.0203678	0.991406	-3.29376
GPR35	271.19	795.83	2.40401	0.0203737	0.991406	-3.294
AAMDC	13.3205	56.7021	2.40093	0.0205256	0.996994	-3.30004
NHP2	232.859	925.149	2.39976	0.020584	0.996994	-3.30236
ST3GAL3	118.088	524.468	2.39971	0.0205864	0.996994	-3.30245
PEMT	127.317	442.383	2.39968	0.0205878	0.996994	-3.30251
ZNF784	127.676	495.915	2.39905	0.020619	0.997305	-3.30374
PGGT1BP1	-0.360806	0.276596	-2.39815	0.0206641	0.99738	-3.30552
SNTA1	101.639	339.702	2.39803	0.0206702	0.99738	-3.30576
P2RX4	466.203	2067.04	2.39618	0.0207625	1	-3.30939
HINT1	899.454	3301.81	2.39544	0.0207995	1	-3.31084
STMN3	1397.83	4748.74	2.39407	0.0208685	1	-3.31353
RPS25P3	-2.60623	3.51064	-2.39387	0.0208788	1	-3.31393
PER1	830.493	2356.66	2.39284	0.0209304	1	-3.31594
THAP7	451.749	1613.81	2.39178	0.020984	1	-3.31803
BRMS1	913.698	3961.02	2.39069	0.021039	1	-3.32015
BEGAIN	126.723	253.34	2.38961	0.0210941	1	-3.32229
RNU6-548P	-0.807692	0.553191	-2.38945	0.0211023	1	-3.3226
TNFAIP8L2	1333.13	6483.81	2.38784	0.021184	1	-3.32575
GRID1	2.85714	3.7234	2.38744	0.0212044	1	-3.32653
P3H3	54.3974	146.426	2.38705	0.0212244	1	-3.32729
LINC03111	-0.369963	0.319149	-2.38679	0.0212378	1	-3.32781
COMMD9	590.749	2846.7	2.38571	0.0212931	1	-3.32992
LINC01011	62.5055	311.149	2.38537	0.0213107	1	-3.33059
TBC1D3L	91.1319	164.128	2.38519	0.0213196	1	-3.33094
MIEN1	339.987	1495.74	2.38477	0.021341	1	-3.33175
PSMB4	2195.18	10656.6	2.38348	0.0214076	1	-3.33429
SLX9	136.96	517.574	2.38343	0.0214103	1	-3.33439
DAD1	1030.26	4822.17	2.38342	0.0214108	1	-3.33441
GPATCH3	244.731	1153.38	2.38341	0.0214112	1	-3.33442
ACAP3	1123.71	4774.15	2.38284	0.0214406	1	-3.33554
SYCE1L	25.9029	67.234	2.38118	0.0215262	1	-3.33878
SPACA6	114.13	267.66	2.38096	0.0215379	1	-3.33922
FBXW9	44.0586	164.468	2.37947	0.0216149	1	-3.34212
P2RY2	154.929	459.277	2.37888	0.0216458	1	-3.34328
ARPIN	269.476	637.596	2.37882	0.0216489	1	-3.3434
VPS25	416.203	2094.38	2.3787	0.0216551	1	-3.34363
KRT72	467.998	750.702	2.37868	0.0216559	1	-3.34366
PABPN1	1207.76	5594.55	2.37801	0.0216907	1	-3.34497
FXYD6-AS1	8.86813	23.1915	2.37738	0.0217236	1	-3.3462
NDUFB6	354.771	1643.45	2.37652	0.0217685	1	-3.34788
RPS2P46	811.192	3139.74	2.37635	0.0217776	1	-3.34822
DNPH1	184.397	581.34	2.37534	0.0218303	1	-3.35018
ATOX1	295.145	1446.32	2.37435	0.0218825	1	-3.35212
ADAM15	1089.04	4657.02	2.37397	0.0219022	1	-3.35285
PSMB5	341.647	1599.23	2.37383	0.02191	1	-3.35314
CBLN3	70.4341	210.106	2.37376	0.0219136	1	-3.35328
RPS3P3	33.2308	123.383	2.37347	0.0219288	1	-3.35384
RPS18P5	314.097	898.851	2.37343	0.0219309	1	-3.35392
TRMT1	794.535	3263.15	2.3723	0.0219902	1	-3.35611
MIR766	1.8956	2.19149	2.37221	0.0219948	1	-3.35628
CDIPTOSP	1.52198	2.12766	2.37208	0.0220021	1	-3.35655
ACOT11	34.1227	87.6383	2.37203	0.0220048	1	-3.35665
ZNF771	18.304	57.7447	2.37139	0.0220384	1	-3.35789
RPS23	2336.29	7658.13	2.37084	0.0220674	1	-3.35896
TYMP	8955.81	25467.5	2.37076	0.0220716	1	-3.35912
SLC25A1	559.383	2017.26	2.37076	0.0220719	1	-3.35913
RBM24	-2.36447	1.78723	-2.37022	0.0221004	1	-3.36017
CCDC74B	-2.87363	2.55319	-2.36822	0.0222064	1	-3.36406
IL4I1	56.3773	148.426	2.36776	0.0222312	1	-3.36497
RPS26P45	1.11905	1	2.36695	0.0222744	1	-3.36654
KDELR1	838.057	3740.51	2.3668	0.0222823	1	-3.36683
PPP1R17	-18.2692	37.8936	-2.36679	0.0222826	1	-3.36684
C19orf47	157.101	636.383	2.36579	0.0223364	1	-3.3688
TMEM63B	332.004	1749.04	2.36438	0.0224119	1	-3.37154
PPIAP31	21.3407	79.234	2.36369	0.0224489	1	-3.37288
MGST3	444.912	1782.98	2.36369	0.0224489	1	-3.37288
PPIAP11	7.17216	23.8723	2.3633	0.02247	1	-3.37364
ADCK2	225.918	954.404	2.36293	0.0224896	1	-3.37435
LINC02846	16.0714	53.3191	2.36239	0.0225188	1	-3.37541
FBLL1	3.14835	3.17021	2.36213	0.0225328	1	-3.37591
ASMTL-AS1	72.4121	246.915	2.36153	0.0225652	1	-3.37708
DENND1C	2420.82	10816.9	2.36075	0.0226075	1	-3.3786
ATP5PO	168.125	698.957	2.35962	0.0226687	1	-3.38079
SAMD1	429.454	1677.81	2.35907	0.0226981	1	-3.38185
MRPL17	189.885	670.043	2.35772	0.0227717	1	-3.38447
WASH3P	262.681	1113.17	2.35698	0.022812	1	-3.38591
PSMD13	1701.91	8531.96	2.35686	0.0228183	1	-3.38613
MAD1L1	881.978	2731.62	2.3568	0.0228217	1	-3.38625
ACTRT3	1.52747	2.70213	2.35679	0.0228225	1	-3.38628
PHF1	149.485	270.17	2.35606	0.0228624	1	-3.3877
PSMA7	1551.59	7721.28	2.35535	0.0229009	1	-3.38906
POLR2J	493.192	2497.83	2.35529	0.0229046	1	-3.38919
PMP22	46.4286	99.2553	2.35523	0.0229075	1	-3.3893
RPS9	306.148	579.787	2.35452	0.0229464	1	-3.39067
PARK7	1024.76	4939.94	2.35396	0.0229771	1	-3.39176
C8orf82	130.311	577.468	2.35391	0.0229802	1	-3.39187
DYNLL1	841.46	4704.3	2.35213	0.0230778	1	-3.39531
PEBP4	2.49817	4.19149	2.35207	0.023081	1	-3.39542
MEA1	366.782	1821.23	2.35165	0.0231044	1	-3.39624
ZBTB48	854.46	3840.49	2.35104	0.023138	1	-3.39742
SMIM29	329.088	1480.19	2.35069	0.0231575	1	-3.39811
KIAA1191P2	-0.578755	0.489362	-2.35057	0.0231637	1	-3.39832
PGAP3	464.007	1868.45	2.35049	0.0231686	1	-3.39849
EMC9	91.0971	376.489	2.35022	0.0231832	1	-3.399
CDC37	2105.12	10143.1	2.35015	0.0231871	1	-3.39914
PDE4A	312.414	1087.87	2.34952	0.0232222	1	-3.40037
IMPDH1P9	-0.304029	0.212766	-2.34921	0.023239	1	-3.40095
PLA2G4C-AS1	-0.796703	0.702128	-2.34878	0.0232628	1	-3.40179
CNPY3	4507.21	20531.9	2.348	0.0233063	1	-3.4033
UBL7	972.262	5153.09	2.34705	0.0233593	1	-3.40514
MIR6804	1.50733	1.59574	2.34599	0.0234186	1	-3.4072
CEROX1	352.156	781	2.34513	0.0234663	1	-3.40885
RPS27P8	125.67	331.234	2.34501	0.0234729	1	-3.40907
RNU6-784P	-0.446886	0.276596	-2.3448	0.0234848	1	-3.40949
FAM86MP	-0.446886	0.276596	-2.3448	0.0234848	1	-3.40949
PMM1	219.78	918.723	2.34479	0.0234854	1	-3.40951
RACK1	17953.4	71086.1	2.34374	0.0235444	1	-3.41154
MON1A	141.033	589.447	2.34368	0.0235477	1	-3.41165
CD3D	1278.99	4048.38	2.34357	0.0235536	1	-3.41186
ST8SIA5-DT	0.924908	0.702128	2.34286	0.0235935	1	-3.41323
POLR2E	1710.4	7874.7	2.34219	0.0236316	1	-3.41454
FMO2	-1.2326	1.12766	-2.34173	0.0236572	1	-3.41542
USE1	188.136	789.17	2.34126	0.0236836	1	-3.41632
SLC7A7	2849.4	12104.4	2.34079	0.0237103	1	-3.41723
LITATS1	60.2729	248.723	2.34075	0.0237124	1	-3.4173
UQCR11	144.674	722.128	2.3397	0.0237718	1	-3.41933
LSM10	609.648	2969.68	2.33945	0.0237858	1	-3.41981
MAPK15	-0.333333	0.148936	-2.33931	0.0237939	1	-3.42009
KMT5C	192.082	794.83	2.33873	0.0238268	1	-3.42121
NDUFV1	1644.84	7126.96	2.33829	0.0238517	1	-3.42205
DDX41	996.498	4593.06	2.33777	0.0238811	1	-3.42305
DNAJC17	155.969	684.043	2.33687	0.0239323	1	-3.42479
TRMT2A	721.568	3109.21	2.33678	0.0239376	1	-3.42496
RPL32P18	79.5788	181.213	2.33655	0.0239508	1	-3.42541
ACADS	279.004	1220.72	2.33632	0.0239637	1	-3.42585
ZNF787	518.159	2403.21	2.33631	0.0239643	1	-3.42587
ZNF219	111.212	417.617	2.33488	0.0240462	1	-3.42863
ZNF775	53.9121	202.681	2.33458	0.0240628	1	-3.42919
BICDL3P	3.63187	5.7234	2.33417	0.0240865	1	-3.42999
S1PR4	5153.07	20855.5	2.333	0.0241536	1	-3.43225
BLOC1S1	136.366	530.532	2.33267	0.0241723	1	-3.43287
C19orf38	1515.96	6673.62	2.33172	0.024227	1	-3.4347
ANO7L1	21.8004	58.2979	2.33163	0.0242325	1	-3.43489
RAB40C	493.258	2028.72	2.3316	0.0242338	1	-3.43493
CKM	3.43407	7.04255	2.33054	0.0242952	1	-3.43698
LYNX1-SLURP2	0.934066	0.659574	2.3304	0.0243034	1	-3.43725
PSMB10	1228.79	5161.85	2.33019	0.0243154	1	-3.43765
OLFML3	3.94505	9.46809	2.32962	0.024348	1	-3.43874
KIRREL3	21.4707	47.8298	2.32961	0.0243491	1	-3.43877
RTL8A	177.681	805.149	2.32897	0.0243861	1	-3.44
RPS27P4	130.293	363.553	2.32883	0.0243938	1	-3.44026
IL17B	9.75092	23.4894	2.32871	0.0244008	1	-3.44049
LLPH-DT	18.1374	29.3191	2.32812	0.0244354	1	-3.44164
FCN1	21327.2	87820.9	2.32796	0.0244442	1	-3.44193
RABAC1	1056.13	4183.57	2.32707	0.0244963	1	-3.44365
SMPD1	768.987	2953.06	2.32665	0.0245205	1	-3.44445
JMJD4	73.4725	289.787	2.32608	0.0245535	1	-3.44554
NTHL1	106.407	379.149	2.3258	0.0245702	1	-3.44609
COX8A	709.375	2917.47	2.32542	0.0245924	1	-3.44682
PRR29	75.4725	315.894	2.32529	0.0245995	1	-3.44706
IRF2BP1	407.198	1584.83	2.32519	0.0246056	1	-3.44726
NDUFS4	83.0403	250.128	2.3251	0.0246107	1	-3.44742
RPL26L1	41.6777	158.532	2.32502	0.0246152	1	-3.44758
SAMM50	420.077	1909.38	2.32483	0.0246268	1	-3.44796
TBCB	865.927	3901.4	2.3247	0.0246343	1	-3.4482
PSMD8	1186.83	5771.02	2.32165	0.0248131	1	-3.45406
ERH	390.485	1661.49	2.3213	0.0248337	1	-3.45473
LRRC49	-1.58974	2.78723	-2.32103	0.0248494	1	-3.45524
RPS2P4	2.06593	5	2.32074	0.0248666	1	-3.4558
MIER2	209.659	900.553	2.32071	0.0248683	1	-3.45585
HTRA3	11.3516	17.8511	2.32068	0.02487	1	-3.45591
RNPEPL1	4567.02	19611.9	2.32062	0.0248735	1	-3.45602
SLC27A4	228.048	1030.11	2.32044	0.0248839	1	-3.45636
RPL21	4449.97	15866.3	2.32018	0.0248995	1	-3.45687
IDH3B	1125.66	5113.85	2.32014	0.024902	1	-3.45695
RBMX2	227.026	1066.26	2.31966	0.0249299	1	-3.45786
PLA2G7	162.463	460.064	2.31936	0.0249481	1	-3.45844
SLC25A11	849.733	3810.26	2.31919	0.0249577	1	-3.45876
PHETA1	183.372	834.106	2.3191	0.0249632	1	-3.45894
ANKRD13D	3654.08	17056.2	2.31838	0.0250058	1	-3.46032
CD63	2487.17	11932.2	2.31793	0.0250324	1	-3.46118
SDC3	126.223	272.064	2.31725	0.0250727	1	-3.46248
TIMM8B	84.533	318.191	2.31718	0.0250771	1	-3.46262
RPL7P1	415.381	1075.4	2.31657	0.0251129	1	-3.46377
HYAL3	50.7143	205.34	2.31614	0.025139	1	-3.46461
CAPNS1	4461.08	20964.2	2.31434	0.025246	1	-3.46805
IL5RA	589.828	1127.38	2.31384	0.0252758	1	-3.469
SNORD38A	0.269231	0.148936	2.31325	0.025311	1	-3.47013
ASTILCS	0.269231	0.148936	2.31325	0.025311	1	-3.47013
LUADT1	0.269231	0.148936	2.31325	0.025311	1	-3.47013
CFP	5822.08	24922.9	2.31304	0.0253238	1	-3.47054
NUDC	904.527	4146.23	2.31145	0.0254188	1	-3.47357
FADS2	839.234	1303.64	2.31105	0.0254433	1	-3.47434
IGHEP2	6.58608	12.5957	2.31057	0.0254723	1	-3.47526
RNU6-238P	0.858974	0.808511	2.30922	0.0255533	1	-3.47783
KCNIP3	-1.26007	1.25532	-2.309	0.0255668	1	-3.47826
MRPL24	274.625	1194.87	2.30888	0.025574	1	-3.47849
SAXO4	88.7363	293.66	2.30794	0.0256307	1	-3.48028
MRAP-AS1	0.811355	0.829787	2.30702	0.0256863	1	-3.48203
WDR74	319.588	1316.94	2.30699	0.0256885	1	-3.4821
TRIM64B	23.185	26.0638	2.30675	0.0257031	1	-3.48256
POLR3K	120.379	482.021	2.30669	0.0257064	1	-3.48266
SH3TC1	1077.52	4705.17	2.30634	0.0257277	1	-3.48333
ADAMTS9	-0.637363	0.361702	-2.30624	0.0257341	1	-3.48353
C7orf50	470.311	1805.55	2.30542	0.0257835	1	-3.48508
POMC	47.4029	121.128	2.30533	0.0257892	1	-3.48526
VLDLR	49.1026	106.83	2.30506	0.0258057	1	-3.48578
TPGS1	73.544	254.255	2.30459	0.0258342	1	-3.48667
SEZ6L2	1.57326	1.48936	2.30409	0.0258649	1	-3.48763
NDUFS7	133.826	571.936	2.30406	0.0258663	1	-3.48767
RPL22P1	115.344	413.617	2.30401	0.0258696	1	-3.48778
LINC01297	-0.25641	0.191489	-2.30272	0.0259484	1	-3.49024
DOK1	942.086	4385.11	2.30193	0.0259969	1	-3.49175
RASSF7	84.4927	295.979	2.30192	0.0259975	1	-3.49176
RPS3AP19	0.346154	0.191489	2.30147	0.026025	1	-3.49262
CD9	546.625	1611.34	2.30131	0.0260345	1	-3.49291
PLA2G10KP	-0.52381	0.234043	-2.3006	0.0260787	1	-3.49428
COPS6	720.542	3469.98	2.30026	0.0260995	1	-3.49493
RPL23	2692.16	7590.04	2.30009	0.0261097	1	-3.49524
ERI3	344.658	1408.04	2.29933	0.0261568	1	-3.4967
ST6GALNAC4P1	5.41758	13.4255	2.29879	0.02619	1	-3.49772
PSD	85.5201	230.404	2.29824	0.0262239	1	-3.49877
MIR1915HG	-0.957875	0.851064	-2.29798	0.0262398	1	-3.49926
LAGE3	203.504	730.957	2.2974	0.0262758	1	-3.50036
POLD4	346.485	1784.15	2.29728	0.0262834	1	-3.5006
TMEM53	35.7985	151.851	2.2968	0.026313	1	-3.50151
ING4	544.038	2674.96	2.29675	0.0263161	1	-3.5016
MEI1	358.91	1318.21	2.29675	0.0263162	1	-3.50161
PES1	613.919	2540.23	2.29654	0.026329	1	-3.502
MIR3667HG	130.306	466.894	2.29459	0.0264503	1	-3.50571
NDUFAF3	430.093	1939.64	2.29395	0.0264902	1	-3.50693
NPM1P46	1.19231	1.65957	2.29328	0.0265318	1	-3.5082
SLC52A2	237.397	985.66	2.29267	0.0265699	1	-3.50935
UCN	17.141	63.1489	2.29266	0.0265703	1	-3.50937
PSENEN	307.993	1273.62	2.29235	0.0265897	1	-3.50996
MRPS2	217.916	959.787	2.29176	0.0266268	1	-3.51108
TLE5	4823.1	19731.8	2.29085	0.0266837	1	-3.5128
AHCY	468.799	2157.38	2.29014	0.0267285	1	-3.51416
RNU6-577P	-0.789377	0.468085	-2.28949	0.0267694	1	-3.51539
LINC02365	-1.58425	2.3617	-2.28908	0.0267954	1	-3.51617
HEATR6-DT	5.32418	10.6596	2.28887	0.0268086	1	-3.51657
COX6C	209.777	690.809	2.28824	0.0268479	1	-3.51776
MIR4692	1.60256	1.55319	2.28803	0.0268611	1	-3.51815
PHB2	1681.73	8230.74	2.28717	0.0269154	1	-3.51978
AGTRAP	2397.8	11347.7	2.28684	0.0269368	1	-3.52042
MIR6069	2.79487	4.21277	2.28647	0.0269596	1	-3.52111
NSUN5	606.046	2800.02	2.28619	0.0269779	1	-3.52165
PTMS	223.74	1127.72	2.28579	0.0270031	1	-3.52241
CD24	579.416	1638.77	2.28478	0.027067	1	-3.52431
CRIP2	435.562	964.426	2.28466	0.0270745	1	-3.52454
SMARCD3	456.073	2060.91	2.28417	0.0271062	1	-3.52548
RPL7P52	-2.97985	2.44681	-2.28396	0.0271192	1	-3.52587
VPS28	2477.04	10120.5	2.2837	0.027136	1	-3.52637
LGI4	6.47802	18.2979	2.28367	0.0271376	1	-3.52642
LMF1	286.562	1124	2.28361	0.0271412	1	-3.52652
C16orf90	2.1337	3.08511	2.28355	0.0271457	1	-3.52666
RPL23AP61	0.307692	0.170213	2.28347	0.0271506	1	-3.5268
ZNHIT2	75.7546	307.383	2.2833	0.0271616	1	-3.52713
TMEM141	126.747	447.83	2.28328	0.0271623	1	-3.52715
TRAV38-1	35.7692	100.787	2.28293	0.0271849	1	-3.52782
YIF1A	327.934	1372.55	2.28253	0.0272102	1	-3.52857
DRAP1	1702.1	5417.26	2.28241	0.0272178	1	-3.5288
PPP2R5B	380.284	1950.89	2.2816	0.02727	1	-3.53034
POLL	521.872	2979.36	2.28072	0.0273264	1	-3.53201
RNU6-1176P	2.36447	3.21277	2.28041	0.0273461	1	-3.53259
TBC1D21	0.800366	0.680851	2.27963	0.0273958	1	-3.53405
PCOLCE	54.6703	234.957	2.27947	0.0274064	1	-3.53437
RHOXF1P1	21.6758	41.2766	2.27923	0.0274215	1	-3.53481
TRIM64DP	2.11538	1.17021	2.27919	0.0274244	1	-3.53489
MIR3677HG	24.9341	88.9362	2.27877	0.0274514	1	-3.53569
NUDT19-DT	14.6209	55.6596	2.2785	0.0274689	1	-3.5362
RPL37A	7659.39	35325.7	2.2784	0.0274751	1	-3.53639
DYNLT2B	9.61905	28.7021	2.27804	0.0274982	1	-3.53706
FNDC10	93.9176	324.383	2.2774	0.0275396	1	-3.53828
C16orf74	104.114	373.404	2.27693	0.0275701	1	-3.53917
RIMBP3B	11.0055	34.6596	2.27572	0.0276485	1	-3.54146
ARHGAP4	6575.28	30885.1	2.27546	0.0276651	1	-3.54194
IGHV3-30	-10.1557	18.1915	-2.27503	0.0276928	1	-3.54275
OR7E84P	-0.285714	0.12766	-2.27497	0.0276969	1	-3.54287
GPHA2	2.42308	4.34043	2.27453	0.0277251	1	-3.54369
IGHD6-19	-0.342491	0.191489	-2.27431	0.0277394	1	-3.5441
RPL7AP70	45.6648	165.404	2.27364	0.0277833	1	-3.54538
DMAC2	377.808	1808	2.27361	0.0277853	1	-3.54544
RN7SKP38	0.413919	0.276596	2.27358	0.0277868	1	-3.54548
RPS27A	6388.75	24383.7	2.2733	0.0278056	1	-3.54603
LINC02603	3.3663	10.9574	2.27327	0.0278075	1	-3.54608
CWC25	-1.01099	1.29787	-2.27296	0.0278275	1	-3.54666
SNORA46	1.27289	1.08511	2.27267	0.0278462	1	-3.5472
PEX16	525.187	2203.96	2.27228	0.0278718	1	-3.54794
STXBP2	2807.07	11968.9	2.27224	0.0278746	1	-3.54802
MHENCR	484.729	1757.96	2.27171	0.0279088	1	-3.54901
TECRP1	73.1905	241.298	2.27129	0.0279365	1	-3.54981
ATN1	483.137	1962.55	2.27095	0.0279589	1	-3.55046
TECR	965.407	3671.34	2.27076	0.0279713	1	-3.55081
CCR3	2246.7	5635.62	2.2707	0.0279752	1	-3.55093
B3GALT6	268.894	1150.7	2.27012	0.0280129	1	-3.55201
COA6	84.4432	365.809	2.26985	0.0280305	1	-3.55252
CYBA	10575.9	45735.6	2.26895	0.0280897	1	-3.55422
LCAT	141.943	615.617	2.26864	0.0281104	1	-3.55481
HNRNPA1P68	-2.49634	3	-2.26622	0.0282697	1	-3.55936
ALDH4A1	55.4341	256.809	2.26584	0.0282948	1	-3.56008
SWSAP1	61.0788	267.979	2.2654	0.0283241	1	-3.56091
EEF1DP1	13.6099	40.9574	2.26538	0.0283251	1	-3.56094
NUDT2	125.789	516.681	2.26503	0.0283481	1	-3.5616
DEFA1B	20.5733	28	2.26495	0.0283534	1	-3.56175
SLC35A4	1347.17	6095.77	2.26461	0.0283763	1	-3.56239
IDH2-DT	-0.238095	0.106383	-2.26392	0.0284221	1	-3.56369
PCMTD1P2	-0.238095	0.106383	-2.26392	0.0284221	1	-3.56369
PDLIM1P2	-0.238095	0.106383	-2.26392	0.0284221	1	-3.56369
SNF8	274.756	1555.66	2.2635	0.0284497	1	-3.56448
GPR176	3.50366	5.31915	2.26298	0.0284845	1	-3.56546
NUDT16L1	607.949	2768.98	2.26272	0.0285017	1	-3.56595
LRRC20	64.4066	213.915	2.26216	0.0285388	1	-3.56699
H3P13	-0.492674	0.489362	-2.26202	0.0285483	1	-3.56726
AJAP1	25.9084	52.8085	2.26165	0.0285726	1	-3.56795
FUT1	4.18864	5.93617	2.26127	0.0285983	1	-3.56867
LINC01446	-0.875458	0.468085	-2.26071	0.0286356	1	-3.56972
TRAPPC1	1290.37	6054.68	2.25961	0.0287089	1	-3.57178
SHLD1	75.5018	404.957	2.25938	0.0287243	1	-3.57221
RAB44	424.8	1420.23	2.25938	0.0287246	1	-3.57222
NDUFB9	526.397	2376.53	2.25931	0.028729	1	-3.57234
HSD11B2	4.77106	5.82979	2.25888	0.0287581	1	-3.57316
RPL36AP48	-0.598901	0.382979	-2.25876	0.0287662	1	-3.57339
ZNF414	197.185	719.319	2.2587	0.02877	1	-3.57349
DNAJC4	531.143	2482.68	2.2585	0.0287833	1	-3.57386
URM1	738.02	3373.36	2.25842	0.0287892	1	-3.57403
TOMM22	501.304	2367.94	2.25792	0.0288225	1	-3.57496
CYTH2	759.438	3485.64	2.25769	0.0288378	1	-3.57539
CERS4	445.535	1773.09	2.25752	0.0288493	1	-3.57571
TIMM44	304.363	1341.09	2.25705	0.0288808	1	-3.57659
RPL17P39	15.6722	38.5745	2.25675	0.0289015	1	-3.57716
TSPAN4	246.886	954.766	2.2567	0.0289044	1	-3.57724
BLVRA	603.672	2124.85	2.25563	0.0289768	1	-3.57926
QRICH2	62.4853	231.043	2.25504	0.0290166	1	-3.58036
MRPL37	429.178	1967.89	2.25449	0.0290542	1	-3.5814
ADRM1	545.485	2611.23	2.25425	0.0290699	1	-3.58184
KSR2	-2.47985	3.7234	-2.25416	0.0290762	1	-3.58201
XAB2	1115.43	5107.62	2.2537	0.0291075	1	-3.58288
SLIRP	44.5824	204.234	2.2536	0.0291143	1	-3.58307
PRMT7	498.335	2074.53	2.25302	0.0291534	1	-3.58414
RPS8	7266.35	30850.7	2.25294	0.0291589	1	-3.5843
MCAT	72.1136	344.702	2.25286	0.0291642	1	-3.58444
ZSCAN2-AS1	5.02198	12.0638	2.25257	0.0291841	1	-3.58499
CHMP6	231.716	1126.66	2.25248	0.0291902	1	-3.58516
SNRPG	110.436	392.426	2.2523	0.029202	1	-3.58549
KCTD17	216.469	979.511	2.25184	0.0292334	1	-3.58635
POMP	347.156	1825.23	2.25168	0.0292442	1	-3.58665
BOLA2B	18.6374	40.5957	2.25125	0.0292739	1	-3.58747
ITPKC	237.533	1186.83	2.25064	0.0293153	1	-3.5886
SIRT6	375.934	1698.11	2.2503	0.0293384	1	-3.58924
TPI1P1	60.3168	316.319	2.24987	0.0293678	1	-3.59004
WDR24	139.311	569.447	2.24947	0.0293953	1	-3.59079
MRPL28	742.788	3155.81	2.2493	0.0294072	1	-3.59112
AAMP	1150.07	5474.45	2.24852	0.0294602	1	-3.59257
ZDHHC20P4	-0.928571	0.914894	-2.24816	0.0294852	1	-3.59325
MPC1L	0.915751	0.744681	2.24803	0.0294937	1	-3.59348
ZNF214	-0.798535	0.510638	-2.24741	0.0295362	1	-3.59464
LDHBP2	12.9542	37.4043	2.24707	0.0295599	1	-3.59528
RPS20P14	174.962	641.787	2.24696	0.0295674	1	-3.59549
GPC1-AS1	1.18498	0.893617	2.24686	0.0295745	1	-3.59568
ATP13A1	1377.51	6370.79	2.24667	0.0295871	1	-3.59603
STEAP2	0.481685	0.361702	2.2465	0.0295992	1	-3.59635
FTL	52216.7	307703	2.24629	0.0296133	1	-3.59674
HIKESHIP2	-5.55678	16.0213	-2.24606	0.0296291	1	-3.59717
RPL35P1	33.8571	86.8723	2.24541	0.0296742	1	-3.59839
PPIAL4A	0.800366	0.680851	2.24524	0.0296862	1	-3.59871
RPL31	1857.35	4914.66	2.24514	0.029693	1	-3.5989
RNU6-1280P	1.85165	2.59574	2.24492	0.0297078	1	-3.5993
GJA6P	-0.807692	0.553191	-2.24459	0.0297311	1	-3.59993
TRPC5	-1.78755	2.10638	-2.24431	0.0297503	1	-3.60045
GZMM	1388.01	3997.79	2.24412	0.0297629	1	-3.60079
PEF1	798.544	3913.32	2.24409	0.0297652	1	-3.60085
TYROBP	11798.6	48918.8	2.24388	0.0297801	1	-3.60125
FARSA	509.575	2207.7	2.24284	0.0298518	1	-3.60319
STX4	964.916	4854.02	2.24277	0.0298565	1	-3.60331
AP4M1	115.72	521.872	2.24251	0.0298749	1	-3.60381
PCBD1	90.5385	414.085	2.24095	0.0299831	1	-3.60671
MADCAM1-AS1	2.87179	6.25532	2.24074	0.029998	1	-3.60711
DUS1L	1289.72	5906.7	2.24064	0.0300048	1	-3.6073
SORBS3	492.658	1804.91	2.24061	0.0300069	1	-3.60735
CTDNEP1	877.566	4654.32	2.24015	0.0300387	1	-3.6082
POM121L4P	2.95971	6.44681	2.23943	0.0300893	1	-3.60956
TMEM183AP6	-0.542125	0.319149	-2.23919	0.0301056	1	-3.60999
UPK3BL1	-0.456044	0.319149	-2.23904	0.0301165	1	-3.61028
AP5Z1	1364.28	6388.66	2.23881	0.030132	1	-3.6107
FBXO27	3.93223	8.12766	2.23842	0.0301595	1	-3.61143
MAP2K2	2114.22	11118.4	2.23827	0.0301698	1	-3.6117
MRPL34	315.504	1314.91	2.23751	0.0302236	1	-3.61313
LRRC17	8.2967	17.4468	2.23735	0.0302348	1	-3.61343
REXO5	19.837	70.0213	2.23715	0.0302489	1	-3.61381
HCST	233.346	798.085	2.23673	0.0302781	1	-3.61458
FAM229B	7.8956	23.5106	2.23609	0.030323	1	-3.61577
BMS1P8	-10.8059	6.21277	-2.2359	0.0303364	1	-3.61613
TMEM11	230.802	1248.11	2.23554	0.0303619	1	-3.6168
MAGED4B	14.8901	34.8085	2.23518	0.030387	1	-3.61747
TNK2	3273.07	14618.7	2.23395	0.0304735	1	-3.61975
UBE2M	622.87	3141.04	2.2334	0.0305127	1	-3.62078
STING1	1920.51	8499.55	2.23293	0.030546	1	-3.62166
FBF1	103.231	437.106	2.23244	0.0305804	1	-3.62256
KREMEN2	4.94322	11.8298	2.23227	0.0305923	1	-3.62288
NCAPH2	588.524	2604.04	2.23225	0.0305938	1	-3.62292
RNASEK	102.355	460.574	2.23218	0.0305988	1	-3.62305
LBX2-AS1	38.9707	136.511	2.2321	0.0306046	1	-3.6232
RBMX2P3	0.981685	0.638298	2.23191	0.0306183	1	-3.62356
TMEM179B	291.518	1484.17	2.23146	0.0306504	1	-3.6244
NAA80	223.126	855.574	2.2307	0.0307041	1	-3.6258
LHPP	308.37	1486.06	2.23053	0.0307164	1	-3.62613
PKNOX2	-1.39011	0.659574	-2.23047	0.0307207	1	-3.62624
CARHSP1	423.826	2119.36	2.22964	0.0307793	1	-3.62777
HRH4	155.057	361.681	2.22748	0.0309334	1	-3.63178
MLXIP	796.469	3618.36	2.22726	0.0309492	1	-3.63219
NDUFAB1	256.771	1236.23	2.22703	0.0309656	1	-3.63261
LINC01752	0.82967	0.744681	2.22685	0.0309785	1	-3.63295
WNK2	19.5696	46.0638	2.22466	0.031136	1	-3.63702
ZNF580	541.092	2066.85	2.22449	0.0311481	1	-3.63733
PPP1R14BP3	44.3846	156.553	2.22422	0.031168	1	-3.63784
DHPS	748.875	3696.32	2.22319	0.0312422	1	-3.63975
UXT	474.636	2047.66	2.22274	0.0312746	1	-3.64059
CDC42EP1	112.407	364.468	2.22226	0.0313089	1	-3.64146
SNX17	1997.84	9662.43	2.22206	0.0313236	1	-3.64184
ZC3H3	414.883	1716.32	2.22112	0.0313919	1	-3.64359
COX5A	521.716	2515.09	2.22111	0.0313927	1	-3.64361
MST1L	26.8828	67.6809	2.22105	0.0313967	1	-3.64371
GP6-AS1	-1.01465	0.914894	-2.22068	0.031424	1	-3.64441
EEF1B2	75.6374	183.128	2.22002	0.0314716	1	-3.64562
DNAJC19P5	6.74908	24.6383	2.21976	0.0314908	1	-3.64611
BST2	3364.39	8209.91	2.21972	0.0314931	1	-3.64617
CBR3	21.8425	57.7021	2.2195	0.0315093	1	-3.64658
SDS	10.2912	25.9787	2.21937	0.0315191	1	-3.64683
PEX11G	21.7839	60.5745	2.21849	0.0315828	1	-3.64845
GTF2F1	988.288	4562.62	2.21826	0.0315996	1	-3.64888
ZDHHC1	37.1392	137.021	2.21817	0.0316059	1	-3.64904
INTS11	1378.07	6791.19	2.21805	0.031615	1	-3.64927
GEMIN7	178.451	805.574	2.21782	0.0316319	1	-3.6497
STAB1	2695.21	9175.26	2.21781	0.0316327	1	-3.64972
SF3A2	1237.23	5090.04	2.21771	0.0316395	1	-3.64989
IGBP1	531.037	2562.57	2.21678	0.0317081	1	-3.65163
ARHGEF18-AS1	26.1099	49.8723	2.21584	0.0317762	1	-3.65335
ATP5F1AP2	-0.578755	0.489362	-2.21559	0.0317951	1	-3.65383
HMGB2P1	4.24542	8.87234	2.21531	0.0318157	1	-3.65434
PRX	107.361	363.915	2.21379	0.0319269	1	-3.65714
TNFRSF4	177.727	610.936	2.21373	0.0319317	1	-3.65726
SVBP	69.3095	407.532	2.2133	0.0319636	1	-3.65806
RPL21P98	5.30037	13.1702	2.21304	0.031982	1	-3.65853
MT-ND3	10207.5	42411	2.21282	0.0319984	1	-3.65894
HSF4	89.7308	317.638	2.2127	0.0320076	1	-3.65917
KRT38	-0.941392	0.574468	-2.21175	0.0320779	1	-3.66093
CEP250-AS1	13.0861	48.1915	2.21169	0.0320819	1	-3.66103
SNHG7	367.863	1408.21	2.21132	0.0321092	1	-3.66171
SPATA22	-2.53846	2.59574	-2.2113	0.0321109	1	-3.66175
RPL9P7	34.0256	96.4894	2.21064	0.0321598	1	-3.66297
SEMA7A	317.462	1047.62	2.21054	0.0321669	1	-3.66315
ASIC3	42.2912	167.681	2.21019	0.0321932	1	-3.6638
RPS23P6	8.17949	8.19149	2.2097	0.0322292	1	-3.6647
UQCC4	89.8846	363.723	2.20908	0.0322755	1	-3.66585
ZFAND2B	829.174	3880.79	2.20901	0.0322806	1	-3.66597
C11orf68	1008.9	4613.02	2.20891	0.0322882	1	-3.66616
HSPB1	605.386	2364.09	2.2088	0.0322963	1	-3.66636
NT5C3B	150.663	524.298	2.20813	0.0323463	1	-3.66761
ITPA	448.487	1930.77	2.20776	0.0323737	1	-3.66828
SNRPD3	536.842	2845.6	2.20732	0.0324067	1	-3.6691
STX5	832.429	4055.06	2.20724	0.032412	1	-3.66923
FCER1A	780.817	2309.89	2.207	0.0324303	1	-3.66968
CCM2	3088.12	14558.5	2.20671	0.0324521	1	-3.67022
KRT81	9.94872	23.1702	2.20668	0.0324538	1	-3.67026
H2BC7	-16.3223	37.4468	-2.20666	0.032456	1	-3.67032
NAALADL1	174.526	684.213	2.20613	0.0324954	1	-3.67129
PCBP4	186.086	682.894	2.20544	0.0325471	1	-3.67256
NSMF	895.051	3426.47	2.20508	0.0325737	1	-3.67322
LRRC46	27.9945	103.915	2.20505	0.0325761	1	-3.67328
TNFRSF8	316.476	1400.6	2.20457	0.0326123	1	-3.67417
SNRPC	481.509	2247.32	2.20447	0.0326195	1	-3.67434
ZNF385B	-1.49817	1.3617	-2.2041	0.0326475	1	-3.67503
TRPC6	27.544	44.8085	2.20407	0.0326493	1	-3.67507
CD7	2722.28	8504.7	2.20338	0.032701	1	-3.67634
CD300C	492.875	1880.7	2.20327	0.0327097	1	-3.67655
HMG20B	579.604	2770.49	2.20319	0.0327158	1	-3.67671
SLC2A4RG	842.674	3404.26	2.20258	0.0327616	1	-3.67782
TBX1	2.92125	4.42553	2.20254	0.0327645	1	-3.6779
STK11	1401.32	7279.91	2.2019	0.032813	1	-3.67908
CCNQ	214.009	963.34	2.20153	0.032841	1	-3.67976
FAUP1	66.3974	209.064	2.20152	0.0328416	1	-3.67978
PRAP1	3.75641	9.74468	2.20069	0.0329041	1	-3.6813
TLCD1	9.15751	17.4468	2.20063	0.032909	1	-3.68142
PEPD	578.293	2791.38	2.20048	0.0329201	1	-3.68169
RALGAPA1P1	-23.6007	71.4681	-2.20046	0.0329215	1	-3.68173
ARFGAP1	1550.05	7633.62	2.20031	0.0329325	1	-3.68199
MYDGF	429.147	1980.64	2.20028	0.0329347	1	-3.68205
TRBV29-1	2.27656	4.02128	2.19982	0.0329699	1	-3.6829
CHRNA3	1.45788	1.42553	2.19977	0.0329738	1	-3.683
LSM4	700.936	3311.09	2.19972	0.0329776	1	-3.68309
MAGOH-DT	1.67399	3.02128	2.19931	0.0330082	1	-3.68383
ELOF1	554.921	3033.79	2.19823	0.0330904	1	-3.68582
RPL10AP6	78.9103	289.319	2.19811	0.0330993	1	-3.68604
BOLA1	123.903	556.447	2.19784	0.0331202	1	-3.68654
MDK	41.6227	105.787	2.19774	0.033128	1	-3.68673
TNP2	1.15934	1.21277	2.19747	0.0331484	1	-3.68722
RPL28	17194.8	59340.7	2.19698	0.0331853	1	-3.68811
FRRS1	53.6319	112.383	2.19698	0.0331854	1	-3.68812
RABGGTA	424.134	2005.53	2.19666	0.0332096	1	-3.6887
OSBPL7	445.978	1950.43	2.19647	0.033224	1	-3.68905
MS4A2	148.962	354.404	2.19633	0.0332354	1	-3.68932
ACSF2	254.971	1033	2.19496	0.0333397	1	-3.69183
NXT1	157.073	661.511	2.19484	0.0333485	1	-3.69204
TBC1D10C	5582.22	27757.1	2.19472	0.0333582	1	-3.69228
SLC35C2	1216.08	5973.91	2.19462	0.0333657	1	-3.69245
SMG9	535.544	2411.83	2.19457	0.0333698	1	-3.69255
MCM10	-12.6099	21.5957	-2.1945	0.0333748	1	-3.69267
RPL3P7	14.8443	43.0213	2.19443	0.0333799	1	-3.6928
MAP7-AS1	2.04945	3.2766	2.19376	0.0334311	1	-3.69402
GRN	10623.4	46511.3	2.19343	0.0334566	1	-3.69463
KHDRBS3	6.21062	12.3404	2.193	0.0334895	1	-3.69542
KARS1P2	0.192308	0.106383	2.19294	0.0334944	1	-3.69554
RNU6-1162P	0.192308	0.106383	2.19294	0.0334944	1	-3.69554
ADAD1P1	0.192308	0.106383	2.19294	0.0334944	1	-3.69554
HNRNPCP3	0.192308	0.106383	2.19294	0.0334944	1	-3.69554
MSRB1P1	0.192308	0.106383	2.19294	0.0334944	1	-3.69554
RNU6-1189P	0.192308	0.106383	2.19294	0.0334944	1	-3.69554
TEX35	0.192308	0.106383	2.19294	0.0334944	1	-3.69554
IDH2	1077.41	4800.06	2.19255	0.0335245	1	-3.69625
TUFMP1	6.34249	18.1277	2.19186	0.0335773	1	-3.69751
PRRT3-AS1	5.92674	15.6596	2.19172	0.0335883	1	-3.69778
RSL24D1P11	2.19048	3.02128	2.19096	0.0336466	1	-3.69916
HIKESHI	204.753	992.553	2.19039	0.0336905	1	-3.70021
SNRPA	555.513	2196.64	2.19033	0.0336951	1	-3.70032
TBL3	417.326	1843.77	2.18933	0.0337725	1	-3.70215
FIZ1	203.148	985.809	2.18932	0.0337732	1	-3.70217
MRPL4	211.123	847.553	2.18906	0.0337937	1	-3.70266
ACP2	302.658	1232.81	2.18896	0.0338012	1	-3.70283
PET100	56	213.979	2.18844	0.0338413	1	-3.70378
DRC12	80.2234	251.617	2.18821	0.0338593	1	-3.70421
CDK3	13.7711	52.8085	2.18797	0.0338776	1	-3.70464
PAFAH1B1P2	-3.06593	5.44681	-2.18731	0.0339292	1	-3.70586
RNASEH2A	125.597	544.574	2.18718	0.033939	1	-3.70609
HSPA5-DT	1.34799	0.93617	2.1866	0.0339843	1	-3.70715
DAPK3	483.712	2382.68	2.1858	0.0340466	1	-3.70862
RPS15A	799.555	2969.02	2.18532	0.0340837	1	-3.70949
ARPC1AP4	6.2381	19.2128	2.18531	0.0340845	1	-3.70951
RITA1	156.342	746.106	2.18434	0.0341606	1	-3.71129
NDUFA4L2	3.39011	8.44681	2.18401	0.0341864	1	-3.71189
RPL7P9	343.053	952.298	2.18384	0.0341994	1	-3.7122
NDUFA8	199.273	984.617	2.18332	0.0342399	1	-3.71314
H2AX	242.467	1060.7	2.18318	0.0342515	1	-3.71342
COMMD5	309.696	1592.7	2.18282	0.0342797	1	-3.71407
PCYT2	271.861	1260.91	2.18278	0.0342828	1	-3.71415
HSF1	888.976	4304.3	2.18249	0.0343056	1	-3.71468
C1orf162	2487.54	12388.9	2.18247	0.0343069	1	-3.71471
BLOC1S3	434.5	2124.36	2.18229	0.0343211	1	-3.71504
BCAT2	253.54	987.447	2.18213	0.0343331	1	-3.71532
PPP1R14B	235.804	958.064	2.18145	0.0343871	1	-3.71658
JAGN1	351.438	1704.94	2.18129	0.0343993	1	-3.71686
NBDY	269.535	1133.72	2.18107	0.0344168	1	-3.71726
GET3	647.855	3563.34	2.18088	0.0344321	1	-3.71762
RPS4XP11	45.3132	150.638	2.18071	0.0344449	1	-3.71792
RPSAP21	-1.13004	0.851064	-2.18055	0.0344578	1	-3.71822
MAMDC4	96.0897	390.489	2.18053	0.0344596	1	-3.71826
RAB34	189.766	888.596	2.1804	0.0344692	1	-3.71848
AKR1B1	800.278	3658.66	2.18033	0.0344754	1	-3.71862
PLIN2	767.835	2964.62	2.1803	0.0344772	1	-3.71866
ZMYND10	56.7692	184.404	2.17967	0.0345268	1	-3.71981
ABCD1	489.824	2163.68	2.17877	0.0345978	1	-3.72146
TP53I13	671.83	3059.94	2.17798	0.0346603	1	-3.7229
MAF1	1459.54	8086.6	2.17733	0.0347117	1	-3.72408
OLFM2	228.797	716.426	2.17646	0.0347811	1	-3.72568
GRAP	148.85	566.723	2.17615	0.0348053	1	-3.72623
WDR13	633.621	3400.09	2.176	0.0348176	1	-3.72652
DPRXP6	-1.0348	0.808511	-2.17596	0.0348207	1	-3.72659
PPIH	247.83	1056.38	2.17588	0.034827	1	-3.72673
MRPL15	153.07	690.915	2.17558	0.0348512	1	-3.72729
GCHFR	9.96703	34.0851	2.17512	0.0348877	1	-3.72812
RHBDL2	3.07692	5.70213	2.17478	0.0349144	1	-3.72874
SRM	535.901	2175.17	2.17424	0.0349575	1	-3.72972
ZSCAN16-AS1	44.87	216.298	2.17415	0.0349644	1	-3.72988
RPL31P4	1.71978	2.80851	2.17372	0.0349992	1	-3.73067
NDUFB4	539.938	2894.21	2.1737	0.0350008	1	-3.73071
TIALD	1.28205	1.04255	2.17353	0.0350143	1	-3.73102
GTSE1-DT	12.6978	38.5957	2.17351	0.0350155	1	-3.73105
CEACAM19	97.1557	249.936	2.17337	0.035027	1	-3.73131
DNAH7	-5.21062	10.2128	-2.17334	0.0350292	1	-3.73136
CORO1B	1347.85	6891.81	2.17333	0.03503	1	-3.73138
VPS51	1517.12	6713.83	2.17306	0.0350519	1	-3.73188
LINC01362	-0.741758	0.446809	-2.17302	0.035055	1	-3.73195
C12orf57	283.432	786.745	2.1728	0.0350726	1	-3.73235
ANXA2R	325.154	1348.87	2.17211	0.035128	1	-3.73361
MROH1	636.011	2827.98	2.17101	0.0352161	1	-3.73561
AMDHD2	282.72	1322.26	2.17056	0.0352518	1	-3.73642
IHH	1.98535	2.57447	2.17037	0.0352677	1	-3.73678
CHRNB3	1.62637	2.04255	2.16993	0.0353028	1	-3.73757
PRDM8-AS1	-5.04212	10.8298	-2.16988	0.0353064	1	-3.73765
RPL38	4075.48	18195.6	2.16984	0.03531	1	-3.73773
CCDC42	4.59158	11.0638	2.16942	0.0353437	1	-3.73849
PPP1R14B-AS1	1.15201	1.44681	2.16923	0.0353587	1	-3.73884
CLEC4OP	46.0531	67	2.16838	0.0354276	1	-3.74039
NXPH4	21.2033	47.8723	2.16838	0.0354277	1	-3.74039
CREB3	268.916	1396	2.16826	0.0354373	1	-3.74061
PLPP2	-8.29487	11.7447	-2.16808	0.0354514	1	-3.74093
EEFSEC	308.222	1256.55	2.16802	0.0354568	1	-3.74105
SMCO4	397.315	1153.55	2.16756	0.0354939	1	-3.74188
AWAT1	0.694139	0.574468	2.16745	0.0355023	1	-3.74207
RN7SKP232	-0.694139	0.425532	-2.16745	0.0355023	1	-3.74207
RNU7-186P	0.974359	0.87234	2.16729	0.0355157	1	-3.74237
LINC01504	44.6832	162.766	2.16649	0.0355801	1	-3.74382
ALDH2	1023.65	4312.89	2.16497	0.0357034	1	-3.74658
CHCHD6	39.9103	151.745	2.16449	0.0357428	1	-3.74746
UBL5P2	1.03846	1.57447	2.1644	0.0357498	1	-3.74762
RPL34	1326.05	3097.32	2.16309	0.0358563	1	-3.74999
TRPV2	1052.14	4665.09	2.16305	0.0358598	1	-3.75007
DCLK2	17.3919	35.383	2.16268	0.0358903	1	-3.75075
PSMB7	687.438	3834.81	2.16116	0.0360141	1	-3.75349
VIPR1	698.762	2602.79	2.16079	0.0360444	1	-3.75416
G6PC3	300	1327.96	2.16018	0.0360945	1	-3.75527
MS4A6A	2408.03	10702.7	2.15987	0.0361201	1	-3.75584
PYCARD	1215.61	4982.89	2.15917	0.036177	1	-3.75709
HASPIN	-10.1722	26.4681	-2.15909	0.0361837	1	-3.75724
COQ8A	1300.6	5174.15	2.15895	0.0361953	1	-3.7575
LRIG2-DT	1.35897	2.08511	2.15893	0.0361972	1	-3.75754
COQ5	181.114	768	2.15858	0.0362257	1	-3.75817
SRA1	663.467	3307.6	2.15854	0.0362293	1	-3.75825
EEF2	25208.4	128224	2.15809	0.0362666	1	-3.75907
PCDH17	2.0696	2.38298	2.15789	0.0362823	1	-3.75941
FFAR1	-1.8956	2.80851	-2.15779	0.0362911	1	-3.75961
ALYREF	339.048	1695.51	2.15751	0.0363141	1	-3.76011
CCDC61	179.538	835.319	2.15692	0.0363624	1	-3.76117
AP1S1	138.399	638.085	2.15634	0.0364108	1	-3.76223
EEF1A1P29	1.31685	1.68085	2.15579	0.0364563	1	-3.76323
PPIAP7	0.655678	0.553191	2.15543	0.0364855	1	-3.76387
RNU6-1143P	-0.655678	0.446809	-2.15543	0.0364855	1	-3.76387
CCDC183	17.6392	65.234	2.15469	0.0365471	1	-3.76521
ACD	397.637	1822.26	2.15408	0.0365974	1	-3.76631
PLEKHG5	79.0971	218.851	2.15389	0.0366135	1	-3.76666
CA8	36.6337	101.17	2.15377	0.0366233	1	-3.76687
SINHCAFP3	0.884615	0.489362	2.15365	0.0366336	1	-3.7671
TARBP2	259.835	1198.6	2.15361	0.0366368	1	-3.76716
IGHV3-22	0.413919	0.276596	2.15331	0.036662	1	-3.76771
RPS15P4	460.247	1392.32	2.15321	0.0366698	1	-3.76788
SPOUT1	475.555	2212.79	2.15312	0.0366774	1	-3.76805
LINC00929	3.41392	4.93617	2.15283	0.036702	1	-3.76858
PSMB3P1	-2.39194	3.91489	-2.15198	0.0367726	1	-3.77012
RN7SL748P	1.55861	1.95745	2.15177	0.0367897	1	-3.77048
CTNS	251.819	1202.45	2.15092	0.036861	1	-3.77203
ZNF85	-4.02015	4.68085	-2.15043	0.0369016	1	-3.77291
IL4	9.2674	20.9362	2.15023	0.0369189	1	-3.77328
IQSEC2	227.223	881.936	2.14989	0.036947	1	-3.77389
UBALD2	1775.43	8836.11	2.14988	0.0369476	1	-3.7739
FBXW4	618.136	3027.04	2.14977	0.0369572	1	-3.77411
UPF3AP3	2.54212	4.78723	2.14975	0.036959	1	-3.77415
ARHGEF10L	483.74	1889.55	2.14958	0.0369733	1	-3.77445
LRRC27	89.2179	379.021	2.14892	0.0370285	1	-3.77564
FBXO2	64.9011	185.617	2.14872	0.037045	1	-3.776
SUV39H1	135.93	586.957	2.14868	0.0370482	1	-3.77606
TEKTIP1	123.176	458.426	2.14803	0.0371034	1	-3.77725
ECHS1	539.861	2545.17	2.14788	0.0371155	1	-3.77751
HTR6	12.8297	25.383	2.14773	0.0371284	1	-3.77779
STX10	1641.39	7709.57	2.14755	0.0371437	1	-3.77812
PLLP	56.8425	209.064	2.14732	0.0371624	1	-3.77852
OLIG2	159.46	282.021	2.14664	0.03722	1	-3.77975
POLD2	498.247	2021.34	2.14662	0.037222	1	-3.7798
MRPL22	67.9707	332.553	2.14657	0.0372262	1	-3.77989
PARP10	4592.04	12800.1	2.14652	0.0372301	1	-3.77997
RPSAP5	1.89927	2.57447	2.14601	0.0372735	1	-3.7809
GLDC	-37.5348	51.617	-2.14599	0.0372746	1	-3.78092
SOX8	61.2033	138	2.14586	0.0372858	1	-3.78116
MICALL2	36.3681	180.404	2.14564	0.0373044	1	-3.78156
ATP6V0D1	4334.15	20871.9	2.14525	0.0373375	1	-3.78226
RPL24P4	254.441	1001.66	2.14497	0.0373608	1	-3.78276
LRRC3-DT	1.14103	1.29787	2.14489	0.0373681	1	-3.78291
C1QTNF6	228.126	892.34	2.14436	0.0374126	1	-3.78386
UNC93B5	3.21245	7.87234	2.14433	0.0374154	1	-3.78392
RALY	2832.62	14638.7	2.1443	0.0374177	1	-3.78397
ISCA2	164.94	895.957	2.14418	0.037428	1	-3.78419
L3MBTL2-AS1	10.5623	30.3191	2.14357	0.0374793	1	-3.78528
FLAD1	417.207	2024.32	2.14346	0.037489	1	-3.78549
HMGA1P4	5.57509	15.8936	2.1427	0.0375532	1	-3.78685
ERFL	67.696	220.83	2.14239	0.0375798	1	-3.78741
ATP5MC3	826.121	4153.57	2.1423	0.0375871	1	-3.78757
RPL7	4047.38	12102	2.14163	0.0376442	1	-3.78878
RPUSD3	350.297	1668.64	2.14132	0.0376711	1	-3.78935
SYT2-AS1	25.7143	73.5106	2.14113	0.0376868	1	-3.78968
MRPS21	313.037	1461.98	2.14076	0.0377184	1	-3.79035
LMF2	1739.77	8227.81	2.14052	0.0377389	1	-3.79078
LILRP1	-1.57875	1.93617	-2.14051	0.03774	1	-3.7908
HSD11B1L	23.8608	87.7234	2.14036	0.0377528	1	-3.79107
POLR2J4	84.6282	430.149	2.13981	0.0377995	1	-3.79206
IAH1	194.766	896.362	2.13917	0.0378544	1	-3.79321
CPSF4	305.725	1490.55	2.13893	0.0378745	1	-3.79364
ALDOA	13930.5	67894.7	2.13883	0.0378828	1	-3.79381
NDUFA11	270.885	1097.85	2.13843	0.0379176	1	-3.79454
PLAAT4	1169.2	4752.36	2.13819	0.0379377	1	-3.79496
TMEM115	377.963	1936.28	2.13795	0.0379582	1	-3.79539
MFSD14CP	131.709	488.574	2.13759	0.0379897	1	-3.79605
CICP23	-3.34799	5.95745	-2.13705	0.0380359	1	-3.79702
CAPNS2	5.84982	11.617	2.137	0.0380405	1	-3.79711
FAM53A	20.2253	74.617	2.13599	0.0381268	1	-3.79892
NEK2	-24.8938	25.2766	-2.1343	0.0382729	1	-3.80196
PSMB1	1049.13	5305.09	2.13339	0.0383511	1	-3.80359
CIB1	1385	6411.79	2.13259	0.0384209	1	-3.80503
RAB24	337.066	1460.32	2.13255	0.0384237	1	-3.80509
SNRPCP13	-1.01648	0.723404	-2.13239	0.0384377	1	-3.80538
MCRS1	896.375	4726.91	2.13178	0.0384905	1	-3.80647
SMIM27	49.9835	245.936	2.13168	0.038499	1	-3.80665
SPHK2	169.52	821.872	2.13162	0.0385049	1	-3.80677
RPL23AP7	79.9615	252.234	2.13161	0.0385055	1	-3.80678
SYP	26.8919	99.6383	2.1314	0.0385235	1	-3.80716
DHRS1	403.158	1932.4	2.13093	0.038565	1	-3.80801
ATP6V1E1	1125.87	5962.3	2.13004	0.0386424	1	-3.80961
HNRNPABP1	1.21429	0.957447	2.12994	0.0386507	1	-3.80978
PRMT1	868.861	3917.17	2.12914	0.0387203	1	-3.81121
ZDHHC12	573.875	2586.51	2.12878	0.0387516	1	-3.81185
MT-ND1	33740.5	143182	2.12868	0.0387606	1	-3.81204
MTRF1LP1	0.694139	0.574468	2.12832	0.0387918	1	-3.81267
GBX1	0.694139	0.574468	2.12832	0.0387918	1	-3.81267
MPST	320.991	1751.62	2.12754	0.0388604	1	-3.81408
ZNF236-DT	18.848	86.617	2.12735	0.0388773	1	-3.81443
RLN2	11.1337	33.0638	2.12722	0.0388882	1	-3.81465
MYG1-AS1	21.0476	79.5957	2.12666	0.0389376	1	-3.81566
RPL27	3550.42	12523.9	2.12658	0.0389446	1	-3.8158
PCED1A	768.835	3475.17	2.12596	0.0389984	1	-3.8169
SNX8	223.526	1121.32	2.1254	0.0390483	1	-3.81792
CCDC9	498.892	2289.74	2.125	0.039083	1	-3.81862
RPS18P12	31.293	96.7872	2.12494	0.0390881	1	-3.81872
INAFM1	234.606	811.83	2.12494	0.0390885	1	-3.81873
RNU6-640P	-1.07143	0.978723	-2.12452	0.0391249	1	-3.81947
RTCB	744.368	3321.06	2.12409	0.0391633	1	-3.82025
HDHD3	247.546	1103.7	2.1238	0.0391887	1	-3.82077
SRP14	1055.88	5128.72	2.12349	0.0392161	1	-3.82132
PSTPIP1	3070.59	13594.8	2.12328	0.0392346	1	-3.8217
ACOT8	242.245	1269.53	2.12234	0.0393173	1	-3.82337
MRPS7	321.674	1436.04	2.12174	0.0393707	1	-3.82445
COA8	58.5476	329.34	2.12112	0.0394257	1	-3.82556
OLFML2B	19.6575	52.2553	2.12087	0.0394478	1	-3.82601
HMGN1P17	-0.380952	0.170213	-2.12079	0.0394547	1	-3.82614
MIR367	-0.380952	0.170213	-2.12079	0.0394547	1	-3.82614
ILRUN-AS1	18.4011	74.8936	2.12079	0.0394552	1	-3.82615
TOR2A	429.894	2258.77	2.12061	0.0394713	1	-3.82648
MIR1183	-0.304029	0.212766	-2.12059	0.0394724	1	-3.8265
MIR765	2.45238	5.40426	2.11956	0.0395643	1	-3.82835
BRI3	1637.75	8769.28	2.11871	0.0396396	1	-3.82986
CLTA	800.606	4417.94	2.11839	0.039668	1	-3.83043
TBC1D3D	-12.3938	35.1915	-2.11813	0.0396911	1	-3.83089
ITIH1	10.5092	33.766	2.11781	0.0397203	1	-3.83148
GPR141BP	-2.97253	6.21277	-2.11779	0.0397215	1	-3.8315
GAL3ST1	4.36264	9.12766	2.11767	0.0397321	1	-3.83171
BRSK2	11.1593	30.7447	2.1175	0.0397478	1	-3.83202
LINC00960	2.98352	5.93617	2.11728	0.0397674	1	-3.83242
DDX39A	906.733	4421.79	2.11716	0.0397779	1	-3.83263
C2orf76	30.0018	125.787	2.1167	0.0398193	1	-3.83345
GRM7	-0.796703	0.702128	-2.11648	0.0398385	1	-3.83384
LCN2	840.962	1412.21	2.11621	0.0398626	1	-3.83432
PCP2	32.5806	136.404	2.11603	0.0398794	1	-3.83465
RPL37P6	20.7875	53.4043	2.11501	0.0399705	1	-3.83646
UQCC5	38.2125	186.234	2.11497	0.0399742	1	-3.83654
GSDMD	116.509	454.404	2.11474	0.0399943	1	-3.83693
C16orf95-DT	3.51282	6.2766	2.11465	0.0400023	1	-3.83709
AP2M1	3025.08	17524.2	2.11457	0.0400095	1	-3.83724
FAM81B	-2.56777	4.53191	-2.11422	0.0400416	1	-3.83787
PITPNA-AS1	5.44139	19.9149	2.11393	0.0400676	1	-3.83839
GPC1	14.7564	46.8298	2.11378	0.0400808	1	-3.83865
SBNO1-AS1	14.0458	57.5319	2.11333	0.0401216	1	-3.83946
NWD1	2.47985	5.2766	2.11272	0.040176	1	-3.84054
PMF1	302.524	1263.83	2.11249	0.0401969	1	-3.84095
WDR83	76.8828	372.34	2.11243	0.0402021	1	-3.84105
ARHGAP33	149.143	575.362	2.11185	0.040255	1	-3.84209
IGHMBP2	525.881	2069.53	2.11154	0.040283	1	-3.84265
SPMIP5	9.18681	13.5106	2.11148	0.0402878	1	-3.84274
IRF3	1754.7	9091.26	2.11104	0.0403275	1	-3.84352
COG4	868.192	4257.28	2.11043	0.0403832	1	-3.84462
TTC39C-AS1	26.2582	69.383	2.11019	0.0404047	1	-3.84504
GAPDHP32	-1.55495	2.42553	-2.10989	0.0404315	1	-3.84557
COMMD6	224.112	711.596	2.10987	0.0404342	1	-3.84562
MGAT1	4679.5	23954.7	2.10979	0.0404408	1	-3.84575
IMP4	607.002	2776.98	2.10945	0.0404716	1	-3.84635
KIAA0319L	2659.71	9429.04	2.10901	0.0405119	1	-3.84714
GRIA4	-1.59707	2.02128	-2.10894	0.0405185	1	-3.84727
PLAC8	1506.65	6377.28	2.10891	0.0405207	1	-3.84732
TIMM10	288.361	670.043	2.10822	0.0405837	1	-3.84855
ZFAND2A	136.233	565.553	2.1081	0.0405941	1	-3.84875
ATP13A2	617.392	2855.3	2.10801	0.0406025	1	-3.84892
MGMT	167.581	741.085	2.10772	0.0406287	1	-3.84943
TOMM40	368.43	1648.57	2.10767	0.0406335	1	-3.84952
CTDSP1	4215.9	22531.7	2.1074	0.0406577	1	-3.85
KRTAP4-3	-0.542125	0.319149	-2.10658	0.0407328	1	-3.85146
CYP4F12	109.427	340.915	2.10648	0.0407421	1	-3.85164
VAT1	536.714	2648.19	2.10548	0.0408333	1	-3.85341
LINC01600	-0.247253	0.148936	-2.10501	0.0408766	1	-3.85426
RNU6-1034P	-0.247253	0.148936	-2.10501	0.0408766	1	-3.85426
RNU6-1321P	-0.247253	0.148936	-2.10501	0.0408766	1	-3.85426
USF2	1829.46	10610	2.10499	0.0408784	1	-3.85429
S100A6	10568.1	51116.8	2.1049	0.0408864	1	-3.85445
NAGLU	265.625	1280.89	2.10469	0.0409056	1	-3.85482
MAD2L1BP	377.69	1744.74	2.10466	0.0409082	1	-3.85487
NTM	1.24908	1.59574	2.10402	0.0409666	1	-3.856
C6orf226	62.1154	298.362	2.10278	0.0410805	1	-3.8582
COL2A1	0.529304	0.340426	2.10258	0.0410995	1	-3.85857
RN7SL329P	0.820513	0.787234	2.10218	0.0411359	1	-3.85927
PRPH2	8.77106	21.0426	2.1019	0.0411615	1	-3.85976
ALKBH5	1020.71	5096.17	2.10156	0.0411933	1	-3.86038
MIR3202-1	-0.39011	0.212766	-2.10155	0.0411938	1	-3.86039
MTCO1P2	-0.39011	0.212766	-2.10155	0.0411938	1	-3.86039
PCAT18	0.664835	0.510638	2.10109	0.041236	1	-3.8612
NPM1P37	-2.76007	4.42553	-2.10085	0.0412588	1	-3.86164
RPL21P16	218.247	814.447	2.10041	0.041299	1	-3.86241
ARGFXP2	8.68498	16.0426	2.10001	0.041336	1	-3.86312
MXRA7	-419.262	659.83	-2.0999	0.0413462	1	-3.86332
SLC17A1	-2.09341	3.12766	-2.0997	0.0413642	1	-3.86366
RPL21P28	12.5733	45.5745	2.09943	0.041389	1	-3.86414
RHBDL3	1.33516	1.59574	2.09902	0.0414276	1	-3.86488
UQCRHL	31.207	129.787	2.09873	0.0414541	1	-3.86538
FXYD1	1.32234	1.25532	2.09863	0.0414632	1	-3.86556
ABLIM2	18.5073	63	2.09841	0.0414838	1	-3.86595
TUFM	1338.22	6904.15	2.09804	0.0415184	1	-3.86661
SCX	12.0842	31.4468	2.09764	0.0415549	1	-3.86731
AVPI1	27.4725	92.3404	2.09751	0.0415674	1	-3.86755
SAP30	79.9597	356.043	2.09721	0.0415951	1	-3.86807
GGTLC4P	0.716117	0.87234	2.09702	0.0416125	1	-3.86841
LINC01176	61.7674	212.979	2.09625	0.0416849	1	-3.86978
NAPSB	1152.73	5559.49	2.09613	0.0416956	1	-3.86999
DHCR7-DT	103.621	325.894	2.0952	0.0417825	1	-3.87164
LINC02255	0.472527	0.404255	2.09518	0.0417845	1	-3.87167
RPL7L1P11	-0.598901	0.382979	-2.09502	0.0417988	1	-3.87194
LINC01503	90.5183	357.979	2.09501	0.0418001	1	-3.87197
FBXL6	202.659	973.681	2.09487	0.0418127	1	-3.87221
RPL39	2098.24	6696.49	2.0946	0.0418381	1	-3.87269
GRTP1-AS1	-0.199634	0.12766	-2.09452	0.0418453	1	-3.87283
H3P9	-0.199634	0.12766	-2.09452	0.0418453	1	-3.87283
MIR1289-1	-0.199634	0.12766	-2.09452	0.0418453	1	-3.87283
NDUFB4P7	-0.199634	0.12766	-2.09452	0.0418453	1	-3.87283
TUBB8P4	-0.199634	0.12766	-2.09452	0.0418453	1	-3.87283
CLEC11A	59.9249	220.34	2.09416	0.0418796	1	-3.87348
IL1RL1	51.0788	113.447	2.0938	0.0419131	1	-3.87411
RNU6ATAC36P	-0.571429	0.255319	-2.09362	0.0419302	1	-3.87443
MYT1L	3.08608	3.65957	2.09346	0.0419444	1	-3.8747
MIR4440	-0.871795	0.851064	-2.09342	0.0419481	1	-3.87477
COMT	433.914	2054.09	2.09338	0.041952	1	-3.87484
PCED1B-AS1	1393.28	6253.51	2.09337	0.0419529	1	-3.87486
DYNLRB1	899.764	4609.17	2.09293	0.0419947	1	-3.87565
NEUROG3	0.919414	1.12766	2.09282	0.0420045	1	-3.87584
HAGH	835.068	4509	2.09244	0.0420407	1	-3.87652
NELFB	816.522	4065.98	2.0919	0.0420907	1	-3.87746
ERAL1	326.734	1759.13	2.09168	0.0421118	1	-3.87786
LINC01970	4.163	11.2553	2.09162	0.0421173	1	-3.87796
TRIP6	116.612	552.128	2.09127	0.0421504	1	-3.87858
SYMPK	1345.69	6766.62	2.09119	0.0421578	1	-3.87872
RPL36AP7	2.91209	5.46809	2.09099	0.0421762	1	-3.87907
PAPSS1	1011.64	3270.72	2.0893	0.0423359	1	-3.88206
RPL15	7993.08	39237.7	2.08921	0.0423442	1	-3.88222
SCGB1A1	1.51648	1.55319	2.08905	0.0423592	1	-3.8825
SLC35G5	5.69048	11.9574	2.08885	0.0423786	1	-3.88286
CNN3-DT	3.1337	6.6383	2.08873	0.0423896	1	-3.88306
CCDC107	34.2784	137.915	2.08858	0.0424037	1	-3.88333
DRG1	296.549	1589.19	2.08824	0.0424357	1	-3.88393
ELOCP2	7.21429	34.2766	2.08804	0.0424548	1	-3.88428
RABEP2	420.797	1927.64	2.08739	0.0425166	1	-3.88543
ADPRS	609.656	2877.45	2.08723	0.0425316	1	-3.88571
NAA60	904.299	4189.3	2.08707	0.0425462	1	-3.88598
PGAP6	2320.38	10339.9	2.08668	0.0425836	1	-3.88668
MYL5	137.811	683.617	2.08633	0.0426168	1	-3.8873
VILL	479.449	2311.89	2.08607	0.0426409	1	-3.88775
CADPS2	-0.331502	0.340426	-2.08534	0.0427106	1	-3.88904
CCDC88B	6129.12	29081.5	2.08484	0.0427584	1	-3.88992
PFKL	1997.14	10566.3	2.08478	0.042764	1	-3.89003
GMFG	2809.74	14512.9	2.08453	0.0427875	1	-3.89046
RECQL5	406.652	2098.77	2.08436	0.0428038	1	-3.89076
ZNF408	238.505	1108.51	2.08429	0.0428102	1	-3.89088
ARAF	1495.94	7789.26	2.08396	0.042842	1	-3.89147
STEAP1	0.886447	0.680851	2.08386	0.0428517	1	-3.89165
SELENOM	195.575	638	2.08362	0.0428743	1	-3.89207
MCM5	839.493	3918.64	2.08341	0.042894	1	-3.89243
MYL6B	37.6392	165.298	2.08276	0.0429563	1	-3.89358
MVK	114.745	550	2.08259	0.042973	1	-3.89389
DDIT3	115.322	578.319	2.08187	0.0430416	1	-3.89515
TRBJ2-2	6.57875	16.8298	2.08175	0.0430532	1	-3.89536
NIBAN2	668.416	2834	2.08159	0.043068	1	-3.89563
HMGA1	1259.79	5608.57	2.08116	0.0431097	1	-3.8964
ELN-AS1	0.653846	0.361702	2.08076	0.0431484	1	-3.89711
LINC01700	1.01648	1.2766	2.08075	0.0431485	1	-3.89711
RPS27AP16	475.286	1811.64	2.08047	0.0431754	1	-3.89761
MIR1270	-1.35897	0.914894	-2.08047	0.0431757	1	-3.89761
PPP1R3F	108.606	510.128	2.08043	0.0431793	1	-3.89768
BCRP3	8.7674	15.6596	2.08028	0.0431939	1	-3.89794
RTCA-AS1	6.97985	20.766	2.08013	0.0432083	1	-3.89821
FTH1P16	4.40476	16.5319	2.08009	0.0432125	1	-3.89829
PDLIM3	-0.369963	0.319149	-2.07994	0.0432271	1	-3.89855
CORT	2.82967	5.85106	2.07954	0.0432648	1	-3.89924
EPHB6	104.549	404.979	2.07932	0.0432864	1	-3.89964
SFRP1	2.18681	3.6383	2.07916	0.0433019	1	-3.89992
SRRM2-AS1	11.9011	49.2979	2.07881	0.0433351	1	-3.90053
MIF4GD	361.973	1746.38	2.07852	0.0433637	1	-3.90105
APLN	0.734432	0.787234	2.07848	0.0433669	1	-3.90111
TRBC2	410.637	1201.45	2.0784	0.0433744	1	-3.90124
CCDC175	-0.465201	0.361702	-2.07784	0.0434287	1	-3.90223
RPL24P8	66.1832	224.66	2.07717	0.043493	1	-3.9034
SLC7A8	89.7381	169.404	2.07693	0.0435165	1	-3.90383
NAT9	425.278	2104.21	2.07633	0.0435748	1	-3.90489
LINC00398	-7.5989	17.5106	-2.07563	0.0436427	1	-3.90612
ABHD14A-ACY1	1.09158	1.12766	2.07518	0.0436863	1	-3.90691
GAS2L1P2	1.81319	2.57447	2.07484	0.0437193	1	-3.90751
RPL23P8	7.74908	17.1915	2.07398	0.0438022	1	-3.90901
MINAR1	44.4579	88.2128	2.07338	0.043861	1	-3.91007
FAM89A	31.1685	110.766	2.07313	0.0438856	1	-3.91051
B4GALT7	272.667	1471.17	2.07259	0.0439379	1	-3.91145
OXLD1	348.791	1591.23	2.07251	0.0439453	1	-3.91158
MAP3K10	228.218	1019.91	2.07174	0.0440209	1	-3.91294
EEF1B2P3	173.419	650.553	2.07145	0.0440491	1	-3.91345
TESC	1186.35	4496.85	2.07043	0.0441488	1	-3.91524
LMAN2	1626.77	9699.91	2.0703	0.0441619	1	-3.91547
FXYD7	39.7125	137.064	2.06985	0.0442057	1	-3.91626
CXCL5	-157.828	283.596	-2.06984	0.0442065	1	-3.91627
TNIP2	581.106	3088.51	2.06966	0.0442237	1	-3.91658
CES1	87.3077	151.298	2.06902	0.0442865	1	-3.9177
GPSM3	161.537	439.17	2.06895	0.0442935	1	-3.91782
RHOXF1P2	10.3828	19.5532	2.06601	0.0445827	1	-3.92297
ANG	26.6557	77.9362	2.0655	0.0446335	1	-3.92387
CIAPIN1P	0.650183	0.978723	2.06546	0.0446376	1	-3.92394
PHYHD1	17.8993	44.4255	2.06507	0.0446755	1	-3.92461
RNU2-38P	0.857143	0.617021	2.06456	0.0447265	1	-3.92551
RPS28P4	48.5788	101.064	2.06414	0.0447676	1	-3.92624
GSS	367.363	1709.94	2.06406	0.0447758	1	-3.92638
CDH4	2.98901	6.51064	2.06405	0.0447767	1	-3.9264
SPATA18	3.47985	4.82979	2.06379	0.0448022	1	-3.92685
CLPP	370.756	1743.77	2.06311	0.0448698	1	-3.92804
RNF152P1	-0.835165	0.680851	-2.06307	0.0448736	1	-3.9281
ANKS3	179.055	827.766	2.06239	0.0449416	1	-3.9293
MIR548I2	0.664835	0.510638	2.06226	0.0449543	1	-3.92952
FHIT	410.37	1242.49	2.06203	0.0449778	1	-3.92993
RPL10A	7206.03	32922.2	2.06202	0.0449783	1	-3.92994
LINC02683	0.221612	0.170213	2.06188	0.0449927	1	-3.9302
NFKBIE	431.555	2153.45	2.0618	0.0449999	1	-3.93032
NLRP7	-0.483516	0.446809	-2.06163	0.0450172	1	-3.93063
LINC01792	-1.00916	0.489362	-2.06155	0.0450253	1	-3.93077
TRBV5-5	13.848	40.8511	2.06103	0.0450767	1	-3.93167
NUTF2	488.289	2563.21	2.06098	0.0450814	1	-3.93175
PSEN2	88.5696	364.234	2.06008	0.0451712	1	-3.93332
RPS2P32	6.01832	26.234	2.05986	0.0451937	1	-3.93372
BCKDK	851.901	4055.98	2.05908	0.0452719	1	-3.93508
CLEC4G	33.7179	76.3191	2.05905	0.0452741	1	-3.93512
ATG4B	1153.29	5700.28	2.05877	0.045302	1	-3.93561
CABP7	10.5659	37.7021	2.05874	0.0453057	1	-3.93567
MIR6799	0.404762	0.319149	2.05872	0.0453072	1	-3.9357
LTBP3	1374.92	5472.6	2.05852	0.045328	1	-3.93606
SLC3A2	956.183	4620	2.05838	0.0453414	1	-3.93629
PARD6G-AS1	10.1172	27.7872	2.05821	0.0453585	1	-3.93659
RPSAP18	9.51832	30.1702	2.0582	0.0453593	1	-3.9366
NUDT19P4	-0.456044	0.319149	-2.05816	0.0453638	1	-3.93668
RPL22P2	3.53297	11.383	2.057	0.0454799	1	-3.9387
AP3S2	282.881	1473.11	2.05692	0.0454884	1	-3.93885
CHCHD2P11	0.230769	0.12766	2.05633	0.0455477	1	-3.93987
ECEL1P3	0.230769	0.12766	2.05633	0.0455477	1	-3.93987
RPL15P3	249.722	1259.19	2.0559	0.04559	1	-3.94061
MAP2K5	209.678	1040.47	2.05484	0.0456975	1	-3.94247
COL13A1	-97.7546	106.447	-2.05431	0.0457503	1	-3.94338
GOLGA8VP	9.22711	27.7234	2.05399	0.0457826	1	-3.94393
CLPTM1L	275.401	1364.06	2.0538	0.0458022	1	-3.94427
MOGAT1	1.22894	1.48936	2.05349	0.0458333	1	-3.94481
SART1	1360.43	6826.15	2.0532	0.0458629	1	-3.94532
MIR25	18.6355	83.4043	2.05319	0.045864	1	-3.94534
PRPF31-AS1	2.67399	5.57447	2.05187	0.0459978	1	-3.94763
RN7SL619P	-1.74542	2.51064	-2.05154	0.0460307	1	-3.9482
PON3	0.423077	0.234043	2.05149	0.0460365	1	-3.9483
ENDOG	30.1227	94.4255	2.05134	0.046051	1	-3.94855
TUBB2BP1	-0.578755	0.489362	-2.05065	0.0461217	1	-3.94976
DDI1	0.413919	0.276596	2.0503	0.0461571	1	-3.95036
DEF6	3497.12	16872.3	2.05018	0.0461695	1	-3.95057
PCDHB9	0.954212	0.765957	2.05	0.0461879	1	-3.95089
TRPT1	187.712	880.936	2.04984	0.0462036	1	-3.95116
MGST2	194.934	1028.98	2.04772	0.0464202	1	-3.95484
TMEM125	2.10623	3.21277	2.04697	0.0464971	1	-3.95615
TELO2	580.002	2746.04	2.04652	0.0465433	1	-3.95693
YDJC	332.81	1524.3	2.04614	0.0465815	1	-3.95758
ISY1	193.313	1098.51	2.04584	0.0466124	1	-3.9581
BICRA-AS2	7.90659	23.6596	2.04534	0.0466638	1	-3.95897
SIT1	856.857	3491.15	2.04474	0.046726	1	-3.96002
PLPP7	15.3791	46.9362	2.04381	0.0468213	1	-3.96163
AMMECR1-IT1	-1.3956	1.08511	-2.04373	0.0468296	1	-3.96176
ILVBL	305.286	1410.6	2.04351	0.046852	1	-3.96214
SOAT2	25.6777	77.6809	2.04323	0.0468814	1	-3.96264
CCT3	1592.25	7965.3	2.04321	0.0468831	1	-3.96266
VASH1-DT	-0.721612	0.553191	-2.0428	0.0469256	1	-3.96338
MTND4P24	-2.08425	2.08511	-2.04246	0.0469605	1	-3.96397
MDH1B	0.842491	1.08511	2.04236	0.046971	1	-3.96414
RN7SL37P	-0.428571	0.191489	-2.04205	0.0470029	1	-3.96468
FTLP1	-0.285714	0.12766	-2.04191	0.0470174	1	-3.96492
AK3P7	1.39377	1.7234	2.04186	0.0470221	1	-3.965
NPY6R	-4.96703	11.6809	-2.04183	0.0470254	1	-3.96505
RPL37P23	6.74908	21.6383	2.04138	0.0470717	1	-3.96583
NEFM	4.35897	11.7447	2.04126	0.0470848	1	-3.96605
BIRC6-AS2	-2.79487	3.78723	-2.04122	0.0470883	1	-3.96611
A2ML1-AS2	-0.142857	0.0638298	-2.04115	0.0470962	1	-3.96624
ADH5P3	-0.142857	0.0638298	-2.04115	0.0470962	1	-3.96624
AKR1B1P2	-0.142857	0.0638298	-2.04115	0.0470962	1	-3.96624
CCL3	-0.142857	0.0638298	-2.04115	0.0470962	1	-3.96624
CIMIP6	-0.142857	0.0638298	-2.04115	0.0470962	1	-3.96624
CUBNP3	-0.142857	0.0638298	-2.04115	0.0470962	1	-3.96624
CYP2C18	-0.142857	0.0638298	-2.04115	0.0470962	1	-3.96624
CYP3A51P	-0.142857	0.0638298	-2.04115	0.0470962	1	-3.96624
EEF1A1P46	-0.142857	0.0638298	-2.04115	0.0470962	1	-3.96624
EIF4A1P6	-0.142857	0.0638298	-2.04115	0.0470962	1	-3.96624
EML6-AS1	-0.142857	0.0638298	-2.04115	0.0470962	1	-3.96624
FENDRR	-0.142857	0.0638298	-2.04115	0.0470962	1	-3.96624
FRMD3-AS1	-0.142857	0.0638298	-2.04115	0.0470962	1	-3.96624
GAPDHP74	-0.142857	0.0638298	-2.04115	0.0470962	1	-3.96624
KRT18P60	-0.142857	0.0638298	-2.04115	0.0470962	1	-3.96624
LINC02050	-0.142857	0.0638298	-2.04115	0.0470962	1	-3.96624
MEIS1-AS3	-0.142857	0.0638298	-2.04115	0.0470962	1	-3.96624
MIR1-1HG	-0.142857	0.0638298	-2.04115	0.0470962	1	-3.96624
OR2G2	-0.142857	0.0638298	-2.04115	0.0470962	1	-3.96624
PNPLA5	-0.142857	0.0638298	-2.04115	0.0470962	1	-3.96624
RN7SKP55	-0.142857	0.0638298	-2.04115	0.0470962	1	-3.96624
RN7SL724P	-0.142857	0.0638298	-2.04115	0.0470962	1	-3.96624
RNA5SP128	-0.142857	0.0638298	-2.04115	0.0470962	1	-3.96624
RPL34P8	-0.142857	0.0638298	-2.04115	0.0470962	1	-3.96624
SLC25A6P2	-0.142857	0.0638298	-2.04115	0.0470962	1	-3.96624
TMPRSS11BNL	-0.142857	0.0638298	-2.04115	0.0470962	1	-3.96624
PRSS23-AS1	-0.437729	0.234043	-2.03964	0.0472525	1	-3.96885
GH1	3.5696	8.21277	2.0394	0.0472776	1	-3.96927
RIMBP3	30.1941	92.8936	2.03877	0.0473431	1	-3.97036
LINC00293	-2.5641	1.91489	-2.03862	0.0473585	1	-3.97061
PRADC1	78.7216	439.596	2.03838	0.0473833	1	-3.97103
CCND3	5336.62	26072.4	2.03818	0.047404	1	-3.97137
NHLRC4	37.1612	166.319	2.03779	0.0474449	1	-3.97205
MIR9-3HG	84.6886	278.468	2.03747	0.0474777	1	-3.97259
SLC27A5	31.9524	109.723	2.03732	0.0474941	1	-3.97287
SEC61B	541.864	3135.66	2.0373	0.0474957	1	-3.97289
SOD1	727.328	3524.45	2.03708	0.0475188	1	-3.97327
QPCTL	91.4542	373.83	2.03688	0.0475401	1	-3.97363
LINC01569	44.3846	163.553	2.03654	0.0475754	1	-3.97421
PPAN	50.7216	206.106	2.03604	0.0476278	1	-3.97508
HDC	607.734	1622.57	2.03603	0.0476286	1	-3.97509
TCEAL3	77.9597	361.936	2.0356	0.0476734	1	-3.97583
CYSRT1	7.08059	17.2979	2.03534	0.047701	1	-3.97629
GTF3C5	717.084	3825.45	2.03533	0.0477013	1	-3.97629
RRP9	207.28	868.809	2.03523	0.0477124	1	-3.97648
LINC02347	1.18498	0.893617	2.03509	0.0477265	1	-3.97671
PSME2P2	19.9744	62.383	2.03486	0.0477507	1	-3.97711
ZNF672	656.299	3404.11	2.03484	0.0477533	1	-3.97715
NSDHL	118.352	633.043	2.03417	0.0478233	1	-3.9783
LINC01141	0.937729	1.04255	2.03386	0.0478553	1	-3.97883
OR8R1P	5.21612	10.3617	2.0337	0.0478725	1	-3.97911
CDH3	1.99451	3.53191	2.03355	0.0478888	1	-3.97938
ATP6V1FP2	3.01832	6.57447	2.03353	0.0478907	1	-3.97941
RNU6-877P	0.684982	0.617021	2.03292	0.047955	1	-3.98047
MRPL43	258.238	1347.62	2.03287	0.0479602	1	-3.98055
CDK18	53.0549	207.064	2.0316	0.0480932	1	-3.98273
EIF3F	2471.62	12920.9	2.03159	0.0480947	1	-3.98276
C1QTNF12	15.8352	40.617	2.03122	0.0481335	1	-3.98339
KLHL2P1	-1.92125	3.12766	-2.0307	0.0481888	1	-3.9843
ZBTB17	554.736	3004.45	2.03029	0.0482312	1	-3.98499
EEF1GP5	3.07509	6.51064	2.02992	0.0482708	1	-3.98564
LINC02626	1.59707	1.97872	2.02966	0.0482982	1	-3.98608
SNORA74C-1	-1.02564	0.765957	-2.02947	0.0483186	1	-3.98641
U2AF1L4	100.264	462.894	2.02945	0.0483202	1	-3.98644
MIR3677	5.99451	17.7447	2.02925	0.0483415	1	-3.98679
LINC02204	-0.818681	0.404255	-2.02916	0.0483508	1	-3.98694
RPL23A	2755.22	12630.8	2.02904	0.0483641	1	-3.98715
COX7B	163.681	649.404	2.02856	0.0484148	1	-3.98798
DMAC1	247.02	1112.74	2.02757	0.04852	1	-3.98969
TRMT9B	-3.58242	6.44681	-2.02749	0.0485279	1	-3.98982
DOC2A	5.89194	13.0213	2.02747	0.0485302	1	-3.98985
THAP8	62.6392	314.128	2.02728	0.0485508	1	-3.99019
TMEM222	900.183	4379.02	2.02689	0.048592	1	-3.99085
CITED4	83.1062	330.021	2.02667	0.0486155	1	-3.99123
IMPDH2	975.005	4863.94	2.02612	0.0486739	1	-3.99218
RPS11P5	30.4524	134.894	2.02586	0.0487014	1	-3.99262
TPSP2	1.21429	1.95745	2.02586	0.0487021	1	-3.99263
PRODHLP	7.99084	20.4681	2.02582	0.0487066	1	-3.99271
PTPN5	-0.664835	0.489362	-2.02551	0.0487396	1	-3.99324
GAPDH	8749.63	49173.1	2.02545	0.0487457	1	-3.99334
IL9RP5	1.00366	0.93617	2.02482	0.0488132	1	-3.99443
RPL7A	9.1044	42.8936	2.02447	0.0488506	1	-3.99503
SNRPF	167.145	796.511	2.02423	0.0488753	1	-3.99542
GATD1	593.802	2896.91	2.02422	0.0488772	1	-3.99546
OGFR	2412.14	11842.9	2.0241	0.0488892	1	-3.99565
DEFA4	205.004	320.787	2.02401	0.0488991	1	-3.99581
STMN4	1.16484	1.78723	2.0236	0.048943	1	-3.99651
MYRF	36.3901	125.702	2.02343	0.0489615	1	-3.99681
SLC35E4	25.6685	104.723	2.02339	0.0489655	1	-3.99687
NCOA4P3	-1.45788	3.57447	-2.02336	0.048969	1	-3.99693
COPZ1	1172.03	6661.79	2.02332	0.0489736	1	-3.997
CISD1	70.6392	290.553	2.0233	0.0489756	1	-3.99704
CTSK	167.821	683.17	2.02265	0.0490445	1	-3.99814
PTGES2	381.361	1941.49	2.02258	0.0490528	1	-3.99827
TRAF2	322.408	1467.83	2.02256	0.049055	1	-3.99831
TRIM55	-0.694139	0.425532	-2.02254	0.0490573	1	-3.99835
PPOX	277.553	1462.06	2.02241	0.0490705	1	-3.99856
PPP1R37	300.868	1493.72	2.02171	0.0491459	1	-3.99977
TEN1	1.21062	1.57447	2.02147	0.0491713	1	-4.00017
TRIM11	525.11	2896.91	2.02089	0.0492342	1	-4.00118
MFNG	2409.82	12207	2.02088	0.0492346	1	-4.00118
SAYSD1	152.595	714.319	2.02088	0.0492351	1	-4.00119
MANBAL	261.26	1381.57	2.02048	0.0492781	1	-4.00188
RN7SL75P	-1.77656	3.25532	-2.02044	0.0492827	1	-4.00195
OSGIN1	78.7546	301.043	2.02042	0.0492848	1	-4.00199
HADHA	2144.42	11996.3	2.02031	0.0492969	1	-4.00218
POM121L14P	-0.739927	0.638298	-2.02018	0.0493104	1	-4.00239
ETDA	0.807692	0.446809	2.01965	0.0493677	1	-4.00331
CHCT1	-1.67766	2.59574	-2.01953	0.049381	1	-4.00352
PODNL1	7.16484	22.1064	2.0189	0.0494485	1	-4.00459
LINC01614	-0.47619	0.212766	-2.01866	0.0494746	1	-4.00501
LRP1	2156.35	8706.26	2.01842	0.0495008	1	-4.00542
CCL23	16.7308	22.2553	2.01806	0.0495388	1	-4.00603
RNA5SP241	-0.531136	0.468085	-2.01728	0.0496236	1	-4.00737
OCIAD2	198.425	809.957	2.01717	0.0496354	1	-4.00756
PPP4C	1924.59	10226.6	2.01714	0.0496393	1	-4.00762
MIRLET7BHG	147.897	492.149	2.01623	0.0497375	1	-4.00917
NME2	13.3443	35.1915	2.01567	0.0497984	1	-4.01013
RNA5SP145	-0.551282	0.361702	-2.01523	0.0498456	1	-4.01088
KDF1	29.5549	100.064	2.01514	0.0498555	1	-4.01103
GIPC1	344.392	1397.28	2.01514	0.0498563	1	-4.01104
KLC1	610.577	2938.77	2.01471	0.0499031	1	-4.01178
KARS1	1726.14	8338.36	2.01438	0.0499381	1	-4.01233
COPZ2	20.2418	78.3404	2.01432	0.0499449	1	-4.01244
ZNF428	134.441	591.277	2.01428	0.0499492	1	-4.01251
BCAP31P1	-0.25641	0.191489	-2.01423	0.049955	1	-4.0126
EIF4E2P2	-0.25641	0.191489	-2.01423	0.049955	1	-4.0126
RPS27P2	-0.25641	0.191489	-2.01423	0.049955	1	-4.0126
VEGFB	349.643	1505.28	2.01422	0.0499561	1	-4.01262
NUP214	1676.65	9512.13	2.01403	0.0499772	1	-4.01295
LRP8-DT	-3.9707	8.85106	-2.01386	0.0499954	1	-4.01323
TMEM134	324.295	1541.06	2.01357	0.0500268	1	-4.01373
FAM9B	3.49817	7.74468	2.01307	0.0500819	1	-4.01459
HMGB1P9	-2.88645	6.21277	-2.01237	0.0501575	1	-4.01577
DEFB109F	0.97619	1.06383	2.01166	0.050236	1	-4.017
MRM3	103.408	459.681	2.01135	0.0502693	1	-4.01752
LIME1	81.2711	383.149	2.01107	0.0503001	1	-4.01801
ERG28	210.714	1003.85	2.01062	0.0503496	1	-4.01878
RPL22	2750.66	12886.6	2.01062	0.0503501	1	-4.01878
COILP1	-3.04029	7.12766	-2.01032	0.0503827	1	-4.01929
ZNF444	381.418	1685.43	2.01007	0.0504096	1	-4.01971
MMP15	13.9982	42.5532	2.00995	0.0504233	1	-4.01992
SRD5A3	97.9615	306.191	2.00953	0.0504692	1	-4.02064
NUDT18	149.033	746.872	2.0093	0.050495	1	-4.02104
RPL31P18	2.06227	3.61702	2.00901	0.0505259	1	-4.02152
ZACN	5.81136	9.59574	2.00806	0.0506306	1	-4.02315
KRT7-AS	0.992674	0.787234	2.00795	0.050643	1	-4.02334
ODAD3	12.3407	36.2553	2.00777	0.0506628	1	-4.02365
FLYWCH2	156.441	665.447	2.00766	0.0506753	1	-4.02384
PLEKHO1	3030.39	16659.1	2.00723	0.0507228	1	-4.02457
TJP3	122.447	382.213	2.00675	0.0507757	1	-4.02539
ANKRD54	156.747	842.426	2.00568	0.0508942	1	-4.02722
TSPAN32	1134	5417.32	2.00567	0.0508949	1	-4.02723
PGGHG	9279.68	39439.1	2.00508	0.0509601	1	-4.02824
DOHH	110.071	550.319	2.00359	0.0511257	1	-4.03078
SLC29A4	11.4524	29.383	2.00352	0.0511339	1	-4.03091
H2AZ1	1034.47	5964.4	2.00346	0.0511398	1	-4.031
RPL31P21	-0.578755	0.489362	-2.00334	0.0511533	1	-4.03121
PPP1R7	686.189	3784.21	2.00324	0.0511643	1	-4.03137
APOO	26.9103	148.553	2.003	0.0511911	1	-4.03179
KIF20A	-13.6154	27.4681	-2.00283	0.0512104	1	-4.03208
NCLN	1273.85	6051.87	2.00281	0.0512125	1	-4.03211
LRRC3	40.1905	137.043	2.00242	0.0512559	1	-4.03278
MT-TV	0.644689	0.404255	2.00195	0.0513082	1	-4.03358
C19orf48P	258.192	990.83	2.00108	0.0514059	1	-4.03507
CATSPER4	-0.408425	0.297872	-2.00088	0.0514282	1	-4.03541
OR2A9P	25.5897	62.4894	2.00079	0.0514376	1	-4.03555
LSM1	54.8315	271.809	2.00046	0.0514753	1	-4.03613
SORD	287.579	981.277	2.00006	0.0515192	1	-4.0368
NDUFC2	90.7949	492.894	1.99959	0.0515716	1	-4.03759
RANGRF	19.2857	74.383	1.99944	0.0515886	1	-4.03785
IFNG-AS1	-27.9927	58.2766	-1.99905	0.0516321	1	-4.03851
ORM1	319.24	667.553	1.99881	0.0516598	1	-4.03893
ATP5PD	372.271	2119.13	1.99872	0.0516695	1	-4.03908
UROS	265.192	1431.7	1.99839	0.0517066	1	-4.03964
UBAC1	374.612	2382.85	1.99812	0.0517367	1	-4.0401
POP7	125.597	672.574	1.99802	0.0517485	1	-4.04028
VPS72	427.603	2364.21	1.99768	0.0517859	1	-4.04084
RBM14	1025.32	4860.91	1.99723	0.0518369	1	-4.04162
PTOV1	1047.42	5208.43	1.99699	0.0518643	1	-4.04203
HSD17B14	10.5806	19.234	1.9957	0.0520088	1	-4.04421
RPL37P2	22.7161	70.0426	1.99556	0.0520256	1	-4.04446
EEF1A1	82881.7	358144	1.99535	0.0520491	1	-4.04482
UBE2V2P4	1.2967	1.57447	1.99517	0.052069	1	-4.04512
KCNIP1-OT1	-0.666667	0.297872	-1.99517	0.0520695	1	-4.04513
ST3GAL6-AS1	-2.163	2.85106	-1.99515	0.0520711	1	-4.04515
SLC25A10	8.82418	26.5957	1.99497	0.0520912	1	-4.04545
TMEM223	162.745	812.553	1.99475	0.0521161	1	-4.04583
C10orf67-AS1	-0.835165	0.680851	-1.99475	0.0521165	1	-4.04583
NDUFC1	245.489	1237.66	1.99424	0.0521741	1	-4.0467
SMN2	8.11172	18.1064	1.99401	0.0522004	1	-4.04709
EVA1B	84.8297	287.213	1.99359	0.0522479	1	-4.04781
ATP6AP1-DT	14.6557	56.2979	1.99351	0.0522573	1	-4.04795
NDUFS2	1091.39	6083.51	1.99324	0.0522877	1	-4.0484
GAS5	496.473	2188.79	1.99303	0.0523109	1	-4.04875
PCCA-DT	5.60623	18.1489	1.99278	0.0523392	1	-4.04917
MIR181D	0.789377	0.531915	1.99261	0.0523586	1	-4.04946
GAS2L1	189.339	1034.98	1.99248	0.0523734	1	-4.04968
[truncated: 38,195 more rows]
