# Supplementary material
Source: Research Square preprint supplement (doi:10.21203/rs.3.rs-8976053/v1)
Supplement: Supplementary file 16 [file fd0abab4a149be57ea4a271e.xlsx]

## Sheet: pathway result
source	term_name	term_id	highlighted	adjusted_p_value	negative_log10_of_adjusted_p_value	term_size	query_size	intersection_size	effective_domain_size	intersections
GO:MF	binding	GO:0005488	TRUE	5e-324	323.306	18498	744	674	78724	AANAT,ABCG2,ACO1,ADAM28,ADAR,ADCY6,AFF1,AICDA,AIM2,ALAS2,ALDH1A1,ANKRD22,ANKRD29,ANO5,ANOS1,ANXA5,AP1S2,AP1S3,APOBEC3A,APOL6,ARHGAP24,ARHGAP44,ARL4A,ATP10D,ATP1B1,AUNIP,BAHCC1,BANK1,BAZ2B,BCAM,BCAR3,BCL11A,BCL2L1,BEND6,BHLHE41,BLNK,BLVRA,BST2,BTK,BTLA,C1GALT1,C1QA,C1QB,C1QC,C5,C9ORF72,CA1,CACNA1A,CACNA1E,CACNA2D3,CALB1,CALCRL,CALHM6,CASP1,CASP7,CAV1,CCDC181,CCDC50,CCDC68,CCNA1,CCR2,CCRL2,CD151,CD…
GO:MF	molecular_function	GO:0003674	FALSE	5e-324	323.306	20246	744	719	78724	AANAT,ABCG2,ACO1,ACOT9,ADAM28,ADAR,ADCY6,AFF1,AICDA,AIM2,ALAS2,ALDH1A1,ANKRD22,ANKRD29,ANO5,ANOS1,ANXA5,AP1S2,AP1S3,APOBEC3A,APOL6,ARHGAP24,ARHGAP44,ARL4A,ATP10D,ATP1B1,AUNIP,BAHCC1,BANK1,BAZ2B,BCAM,BCAR3,BCL11A,BCL2L1,BEND6,BHLHE41,BLNK,BLVRA,BST2,BTK,BTLA,C1GALT1,C1QA,C1QB,C1QC,C3AR1,C5,C9ORF72,CA1,CACNA1A,CACNA1E,CACNA2D3,CALB1,CALCRL,CALHM6,CASP1,CASP7,CAV1,CCDC181,CCDC50,CCDC68,CCNA1,CCR2,CC…
GO:MF	protein binding	GO:0005515	FALSE	2.950137391254e-312	311.53	15123	744	619	78724	AANAT,ABCG2,ACO1,ADAM28,ADAR,ADCY6,AFF1,AICDA,AIM2,ALAS2,ALDH1A1,ANKRD22,ANKRD29,ANO5,ANOS1,ANXA5,AP1S2,AP1S3,APOBEC3A,APOL6,ARHGAP24,ARHGAP44,ARL4A,ATP10D,ATP1B1,AUNIP,BANK1,BAZ2B,BCAM,BCAR3,BCL11A,BCL2L1,BHLHE41,BLNK,BLVRA,BST2,BTK,BTLA,C1GALT1,C1QA,C1QB,C1QC,C5,C9ORF72,CA1,CACNA1A,CALB1,CALCRL,CALHM6,CASP1,CASP7,CAV1,CCDC181,CCDC50,CCDC68,CCNA1,CCR2,CCRL2,CD151,CD180,CD1C,CD22,CD274,CD40,CD86,…
GO:MF	catalytic activity	GO:0003824	FALSE	1.96E-115	114.707	6817	744	295	78724	AANAT,ABCG2,ACO1,ACOT9,ADAM28,ADAR,ADCY6,AICDA,AIM2,ALAS2,ALDH1A1,ANOS1,ANXA5,APOBEC3A,ARHGAP24,ARHGAP44,ARL4A,ATP10D,BCAR3,BLVRA,BST2,BTK,C1GALT1,C5,C9ORF72,CA1,CASP1,CASP7,CAV1,CCNA1,CDK14,CHD1,CHEK2,CIP2A,CLIC2,CMPK2,COL4A3,CPVL,CTSE,CTSL,CTSV,CXCL10,CYBB,DDAH1,DDX3X,DDX60,DDX60L,DENND5B,DEPDC1B,DHRS9,DNAH8,DNM1,DOCK4,DSE,DTX3L,DUSP3,EIF2AK1,EIF2AK2,EIF2S3,EIF2S3B,ENTPD2,EVI5,FANCL,FAP,FECH,FG…
GO:MF	small molecule binding	GO:0036094	FALSE	1.25E-106	105.903	6577	744	280	78724	ABCG2,ACO1,ADAM28,ADAR,ADCY6,AICDA,ALAS2,ALDH1A1,ANXA5,APOBEC3A,ARL4A,ATP10D,BAZ2B,BCAR3,BCL11A,BLVRA,BTK,C1GALT1,C9ORF72,CA1,CACNA1A,CACNA1E,CACNA2D3,CALB1,CAV1,CD22,CDK14,CHD1,CHEK2,CLEC10A,CLEC4C,CLEC7A,CMPK2,CPNE8,CREB5,CRIP3,CYBB,DAPP1,DDAH1,DDX3X,DDX60,DDX60L,DENND5B,DNAH8,DNM1,DOCK4,DSE,DTX3L,EIF2AK1,EIF2AK2,EIF2S3,EIF2S3B,ENTPD2,FANCL,FECH,FGD4,FOLR2,FOLR3,FSTL1,GALNT5,GALNTL6,GBP1,GBP3,G…
GO:MF	ion binding	GO:0043167	FALSE	3.18E-98	97.4974	6377	744	266	78724	ABCG2,ACO1,ADAM28,ADAR,ADCY6,AICDA,ALAS2,ANXA5,APOBEC3A,ARL4A,ATP10D,BAZ2B,BCAR3,BCL11A,BLVRA,BTK,C1GALT1,C9ORF72,CA1,CACNA1A,CACNA1E,CACNA2D3,CALB1,CD22,CDK14,CHD1,CHEK2,CLEC4C,CLEC7A,CMPK2,CPNE8,CREB5,CRIP3,CYBB,DAPP1,DDAH1,DDX3X,DDX60,DDX60L,DENND5B,DNAH8,DNM1,DOCK4,DSE,DTX3L,EIF2AK1,EIF2AK2,EIF2S3,EIF2S3B,ENTPD2,FANCL,FECH,FGD4,FOLR2,FOLR3,FSTL1,GALNT5,GALNTL6,GBP1,GBP3,GCH1,GK,GLRX5,GNAS,HEL…
GO:MF	metal ion binding	GO:0046872	FALSE	5.28E-65	64.2775	4396	744	185	78724	ACO1,ADAM28,ADAR,ADCY6,AICDA,ANXA5,APOBEC3A,ATP10D,BAZ2B,BCL11A,BLVRA,BTK,C1GALT1,CA1,CACNA1A,CACNA1E,CACNA2D3,CALB1,CHEK2,CLEC4C,CLEC7A,CPNE8,CREB5,CRIP3,CYBB,DDAH1,DSE,DTX3L,FANCL,FECH,FGD4,FSTL1,GALNT5,GALNTL6,GCH1,GK,GLRX5,GNAS,HELZ2,IDH1,IFIH1,IRAK3,JAK2,KDM6A,LACC1,LAP3,LMO2,MAP3K20,MARCHF1,MARCHF3,MARCHF8,MBNL3,MIB1,MMP17,MOB3B,NAIP,NME4,NSF,NT5C2,OAS1,OAS2,OAS3,PARP12,PDLIM5,PDP1,PHF11,PL…
GO:MF	cation binding	GO:0043169	FALSE	2.96E-64	63.5282	4495	744	186	78724	ACO1,ADAM28,ADAR,ADCY6,AICDA,ANXA5,APOBEC3A,ATP10D,BAZ2B,BCL11A,BLVRA,BTK,C1GALT1,CA1,CACNA1A,CACNA1E,CACNA2D3,CALB1,CHEK2,CLEC4C,CLEC7A,CPNE8,CREB5,CRIP3,CYBB,DDAH1,DSE,DTX3L,FANCL,FECH,FGD4,FSTL1,GALNT5,GALNTL6,GCH1,GK,GLRX5,GNAS,HELZ2,IDH1,IFIH1,IRAK3,JAK2,KDM6A,LACC1,LAP3,LMO2,MAP3K20,MARCHF1,MARCHF3,MARCHF8,MBNL3,MIB1,MMP17,MOB3B,NAIP,NME4,NSF,NT5C2,OAS1,OAS2,OAS3,PARP12,PDLIM5,PDP1,PHF11,PL…
GO:MF	hydrolase activity	GO:0016787	FALSE	9.72E-59	58.0124	3255	744	153	78724	ABCG2,ACOT9,ADAM28,ADAR,AICDA,AIM2,ALDH1A1,ANOS1,ANXA5,APOBEC3A,ARHGAP24,ARHGAP44,ARL4A,ATP10D,BCAR3,BST2,BTK,C5,C9ORF72,CA1,CASP1,CASP7,CAV1,CHD1,CIP2A,COL4A3,CPVL,CTSE,CTSL,CTSV,DDAH1,DDX3X,DDX60,DDX60L,DENND5B,DEPDC1B,DNAH8,DNM1,DOCK4,DUSP3,EIF2AK2,EIF2S3,EIF2S3B,ENTPD2,EVI5,FAP,FGD4,GBP1,GBP3,GCH1,GNAS,GNG10,HELZ2,HEXB,HGF,IFIH1,LACC1,LACTB,LAP3,LYZ,MBD4,MGAM2,MMP17,MX1,MX2,NAIP,NAV3,NCKAP1L,…
GO:MF	identical protein binding	GO:0042802	FALSE	1.54E-49	48.813	2182	744	117	78724	ABCG2,AICDA,AIM2,BCL11A,BCL2L1,BHLHE41,BST2,BTK,C1QB,CASP1,CAV1,CCR2,CHEK2,CIP2A,CLCN1,CREB5,CTSE,DIAPH3,DNM1,E2F8,EIF2AK1,EIF2AK2,FAP,FECH,GBP1,GBP3,GCH1,GYPA,HESX1,HEXB,HGF,HHEX,HSD17B4,HSPB1,IDH1,IFI16,IFI27,IFI35,IFIH1,IFIT3,INHBB,IRAK3,JAK2,KDM6A,LACTB,LMO2,LYZ,MAOB,MAP2K6,MLKL,MS4A1,MX1,NLGN1,NT5C2,NTSR1,OPLAH,PIK3AP1,PNPT1,PSME2,PTPRO,RB1,RBBP8,S100A10,SANBR,SAT1,SDC3,SDSL,SLAMF1,SMAD1,SMC…
GO:MF	enzyme binding	GO:0019899	FALSE	1.02E-47	46.9924	2107	744	113	78724	ADCY6,AICDA,ARHGAP44,ATP1B1,BANK1,BCAR3,BCL11A,BCL2L1,BHLHE41,BLNK,BTK,C9ORF72,CASP1,CAV1,CCDC50,CD22,CD40,CHEK2,DENND5B,DIAPH3,DMXL2,DNM1,DOCK4,DTX3L,DUSP3,EVI5,FANCL,FAP,FCRL2,FGD4,GBP1,GCH1,HSPB1,IL31RA,IRAK3,ISG15,JAK2,LGALS9,LYST,MAP2K6,MLKL,NAIP,NRG1,NSF,PARP14,PARP9,PAWR,PDLIM5,PKN2,PLEKHG1,PLSCR1,PLSCR4,PRLR,RASGRP3,RB1,RICTOR,RIN2,RIOK3,SASH1,SIAH2,SMAD1,SMC6,SMTNL1,SP100,STAT1,STAT2,TRI…
GO:MF	heterocyclic compound binding	GO:1901363	FALSE	1.83E-46	45.7376	2558	744	122	78724	ABCG2,ADCY6,ALAS2,ALDH1A1,ARL4A,ATP10D,BCAR3,BLVRA,BTK,C1GALT1,C9ORF72,CDK14,CHD1,CHEK2,CMPK2,CYBB,DDX3X,DDX60,DDX60L,DENND5B,DNAH8,DNM1,DOCK4,EIF2AK1,EIF2AK2,EIF2S3,EIF2S3B,ENTPD2,FGD4,FOLR2,FOLR3,GBP1,GBP3,GCH1,GK,GNAS,HELZ2,IDH1,IFIH1,IRAK3,JAK2,KMO,MAOB,MAP2K6,MAP3K20,MLKL,MX1,MX2,NAIP,NAV3,NME4,NSF,NT5C2,OAS1,OAS2,OAS3,OPLAH,PARP9,PIP5K1B,PKN2,PLEKHG1,RALGPS2,RASGEF1B,RASGRP3,RIN2,RIOK3,RPS6…
GO:MF	carbohydrate derivative binding	GO:0097367	FALSE	2.77E-45	44.5571	2536	744	120	78724	ABCG2,ADCY6,ANOS1,ARL4A,ATP10D,BCAR3,BTK,C9ORF72,CD1C,CD22,CDK14,CHD1,CHEK2,CMPK2,CTSL,CXCL10,DDX3X,DDX60,DDX60L,DENND5B,DNAH8,DNM1,DOCK4,EIF2AK1,EIF2AK2,EIF2S3,EIF2S3B,ENTPD2,FGD4,FSTL1,GBP1,GBP3,GCH1,GK,GNAS,HELZ2,IFIH1,IL2,IRAK3,JAK2,LGALS9,MAP2K6,MAP3K20,MLKL,MX1,MX2,NAIP,NAV3,NME4,NSF,NT5C2,OAS1,OAS2,OAS3,OPLAH,PARP9,PIP5K1B,PKN2,PLEKHG1,PTPRF,RALGPS2,RASGEF1B,RASGRP3,RIN2,RIOK3,RPS6KC1,SIGL…
GO:MF	anion binding	GO:0043168	FALSE	9.14E-43	42.0389	2685	744	120	78724	ABCG2,ADCY6,ALAS2,ARL4A,ATP10D,BCAR3,BTK,C9ORF72,CD22,CDK14,CHD1,CHEK2,CMPK2,CYBB,DAPP1,DDX3X,DDX60,DDX60L,DENND5B,DNAH8,DNM1,DOCK4,EIF2AK1,EIF2AK2,EIF2S3,EIF2S3B,ENTPD2,FGD4,FOLR2,FOLR3,GBP1,GBP3,GCH1,GK,GNAS,HELZ2,IFIH1,IRAK3,JAK2,KMO,MAOB,MAP2K6,MAP3K20,MLKL,MX1,MX2,NAIP,NAV3,NME4,NSF,NT5C2,OAS1,OAS2,OAS3,OPLAH,PARP9,PIP5K1B,PKN2,PLEKHG1,RALGPS2,RASGEF1B,RASGRP3,RIN2,RIOK3,RPS6KC1,SDSL,SESTD1,…
GO:MF	transferase activity	GO:0016740	FALSE	9.49E-43	42.0227	2594	744	118	78724	AANAT,ALAS2,BTK,C1GALT1,CAV1,CCNA1,CDK14,CHEK2,CMPK2,CXCL10,DDX3X,DTX3L,EIF2AK1,EIF2AK2,FANCL,FGGY,GALNT5,GALNTL6,GCNT1,GCNT2,GK,GLYATL2,HERC5,HERC6,HEXB,HNMT,HSPB1,IL2,IRAK3,JAK2,LACC1,MAP2K6,MAP3K20,MARCHF1,MARCHF3,MARCHF8,MIB1,MLKL,MOB3B,NCKAP1L,NME4,NRG1,NSUN3,NT5C2,OAS1,OAS2,OAS3,OASL,PARP12,PARP14,PARP9,PIGN,PIP5K1B,PKN2,PNPLA4,PNPT1,POLK,RICTOR,RIOK3,RPS6KC1,SAT1,SETD9,SIAH2,SNCA,SPTLC2,ST…
GO:MF	nucleoside phosphate binding	GO:1901265	FALSE	1.45E-42	41.8394	2424	744	114	78724	ABCG2,ADCY6,ALDH1A1,ARL4A,ATP10D,BCAR3,BLVRA,BTK,C1GALT1,C9ORF72,CDK14,CHD1,CHEK2,CMPK2,CYBB,DDX3X,DDX60,DDX60L,DENND5B,DNAH8,DNM1,DOCK4,EIF2AK1,EIF2AK2,EIF2S3,EIF2S3B,ENTPD2,FGD4,GBP1,GBP3,GCH1,GK,GNAS,HELZ2,IDH1,IFIH1,IRAK3,JAK2,KMO,MAOB,MAP2K6,MAP3K20,MLKL,MX1,MX2,NAIP,NAV3,NME4,NSF,NT5C2,OAS1,OAS2,OAS3,OPLAH,PARP9,PIP5K1B,PKN2,PLEKHG1,RALGPS2,RASGEF1B,RASGRP3,RIN2,RIOK3,RPS6KC1,SLC38A9,SMC6,S…
GO:MF	nucleotide binding	GO:0000166	FALSE	4.20E-42	41.3768	2406	744	113	78724	ABCG2,ADCY6,ALDH1A1,ARL4A,ATP10D,BCAR3,BLVRA,BTK,C1GALT1,C9ORF72,CDK14,CHD1,CHEK2,CMPK2,CYBB,DDX3X,DDX60,DDX60L,DENND5B,DNAH8,DNM1,DOCK4,EIF2AK1,EIF2AK2,EIF2S3,EIF2S3B,ENTPD2,FGD4,GBP1,GBP3,GCH1,GK,GNAS,HELZ2,IDH1,IFIH1,IRAK3,JAK2,KMO,MAOB,MAP2K6,MAP3K20,MLKL,MX1,MX2,NAIP,NAV3,NME4,NSF,NT5C2,OAS1,OAS2,OAS3,OPLAH,PIP5K1B,PKN2,PLEKHG1,RALGPS2,RASGEF1B,RASGRP3,RIN2,RIOK3,RPS6KC1,SLC38A9,SMC6,SMCHD1,…
GO:MF	molecular function regulator activity	GO:0098772	FALSE	6.07E-42	41.2171	2195	744	108	78724	AIM2,ALDH1A1,ANOS1,ANXA5,ARHGAP24,ARHGAP44,ATP1B1,BCAR3,BST2,BTK,C5,C9ORF72,CASP1,CAV1,CCNA1,CD274,CD86,CIP2A,COL4A3,CTSL,CTSV,CXCL10,CXCL9,DDX3X,DENND5B,DEPDC1B,DOCK4,DTX3L,EIF2AK2,EVI5,FGD4,GBP1,GNAS,HGF,HSPB1,IFNE,IL15,IL1RN,IL2,IL7,INHBB,LY6E,LYPD6B,MACC1,MAP3K20,MMP17,MOB3B,NAIP,NCKAP1L,NRG1,PARP9,PLEKHG1,PNOC,PSME2,RALGPS2,RASAL2,RASGEF1B,RASGRP3,RGPD2,RICTOR,RIN2,SEMA3C,SERPINB2,SERPING1,S…
GO:MF	catalytic activity, acting on a protein	GO:0140096	FALSE	1.19E-41	40.9247	2849	744	122	78724	ADAM28,AIM2,ANOS1,BST2,BTK,C1GALT1,C5,CASP1,CASP7,CAV1,CCNA1,CDK14,CHEK2,CIP2A,COL4A3,CPVL,CTSE,CTSL,CTSV,CXCL10,DDX3X,DTX3L,DUSP3,EIF2AK1,EIF2AK2,FANCL,FAP,GALNT5,GALNTL6,GCNT1,HERC5,HERC6,HGF,HSPB1,IRAK3,JAK2,KDM6A,LACTB,LAP3,MAP2K6,MAP3K20,MARCHF1,MARCHF3,MARCHF8,MIB1,MLKL,MMP17,MOB3B,NAIP,NCKAP1L,NRG1,NT5C2,PARP12,PARP14,PARP9,PDP1,PKN2,PSME2,PTPRF,PTPRO,RICTOR,RIOK3,RPS6KC1,SERPINB2,SERPING1…
GO:MF	molecular transducer activity	GO:0060089	FALSE	3.23E-38	37.4915	2053	744	100	78724	AIM2,BCAM,BTLA,C3AR1,C5,CALCRL,CCR2,CCRL2,CD274,CD40,CD86,CLEC10A,CLEC1A,CLEC7A,CXCL10,CXCL9,FCGR2B,FCRL1,FCRL2,FCRL5,FCRLA,FFAR2,FOLR2,FOLR3,FPR3,GPC4,HGF,HLA-DRA,IFIH1,IFNE,IL15,IL1RN,IL2,IL31RA,IL7,INHBB,LY6E,LYPD6B,MACC1,MARCO,MILR1,MRC1,NLGN1,NRG1,NTSR1,OR2I1P,OR2W3,OR52K1,OSMR,PKHD1L1,PNOC,PRLR,PROKR2,PTPRF,PTPRO,SEMA3C,SLAMF1,TLR10,TLR7,TNFSF10,TNFSF13B,TNFSF15,TRIM5,WNT10A,WNT16,ACVR2B,AD…
GO:MF	signaling receptor activity	GO:0038023	FALSE	3.23E-38	37.4915	2053	744	100	78724	AIM2,BCAM,BTLA,C3AR1,C5,CALCRL,CCR2,CCRL2,CD274,CD40,CD86,CLEC10A,CLEC1A,CLEC7A,CXCL10,CXCL9,FCGR2B,FCRL1,FCRL2,FCRL5,FCRLA,FFAR2,FOLR2,FOLR3,FPR3,GPC4,HGF,HLA-DRA,IFIH1,IFNE,IL15,IL1RN,IL2,IL31RA,IL7,INHBB,LY6E,LYPD6B,MACC1,MARCO,MILR1,MRC1,NLGN1,NRG1,NTSR1,OR2I1P,OR2W3,OR52K1,OSMR,PKHD1L1,PNOC,PRLR,PROKR2,PTPRF,PTPRO,SEMA3C,SLAMF1,TLR10,TLR7,TNFSF10,TNFSF13B,TNFSF15,TRIM5,WNT10A,WNT16,ACVR2B,AD…
GO:MF	purine ribonucleoside triphosphate binding	GO:0035639	FALSE	7.77E-37	36.1097	2087	744	99	78724	ABCG2,ADCY6,ARL4A,ATP10D,BCAR3,BTK,C9ORF72,CDK14,CHD1,CHEK2,CMPK2,DDX3X,DDX60,DDX60L,DENND5B,DNAH8,DNM1,DOCK4,EIF2AK1,EIF2AK2,EIF2S3,EIF2S3B,ENTPD2,FGD4,GBP1,GBP3,GCH1,GK,GNAS,HELZ2,IFIH1,IRAK3,JAK2,MAP2K6,MAP3K20,MLKL,MX1,MX2,NAIP,NAV3,NME4,NSF,NT5C2,OAS1,OAS2,OAS3,OPLAH,PIP5K1B,PKN2,PLEKHG1,RALGPS2,RASGEF1B,RASGRP3,RIN2,RIOK3,RPS6KC1,SLC38A9,SMC6,SMCHD1,STRADB,SWAP70,TRPM4,TUBB6,UBE2L6,VRK2,WAR…
GO:MF	purine ribonucleotide binding	GO:0032555	FALSE	1.44E-36	35.8402	2147	744	100	78724	ABCG2,ADCY6,ARL4A,ATP10D,BCAR3,BTK,C9ORF72,CDK14,CHD1,CHEK2,CMPK2,DDX3X,DDX60,DDX60L,DENND5B,DNAH8,DNM1,DOCK4,EIF2AK1,EIF2AK2,EIF2S3,EIF2S3B,ENTPD2,FGD4,GBP1,GBP3,GCH1,GK,GNAS,HELZ2,IFIH1,IRAK3,JAK2,MAP2K6,MAP3K20,MLKL,MX1,MX2,NAIP,NAV3,NME4,NSF,NT5C2,OAS1,OAS2,OAS3,OPLAH,PIP5K1B,PKN2,PLEKHG1,RALGPS2,RASGEF1B,RASGRP3,RIN2,RIOK3,RPS6KC1,SLC38A9,SMC6,SMCHD1,STRADB,SWAP70,TRPM4,TUBB6,UBE2L6,VRK2,WAR…
GO:MF	purine nucleotide binding	GO:0017076	FALSE	1.69E-36	35.7734	2241	744	102	78724	ABCG2,ADCY6,ALDH1A1,ARL4A,ATP10D,BCAR3,BTK,C9ORF72,CDK14,CHD1,CHEK2,CMPK2,DDX3X,DDX60,DDX60L,DENND5B,DNAH8,DNM1,DOCK4,EIF2AK1,EIF2AK2,EIF2S3,EIF2S3B,ENTPD2,FGD4,GBP1,GBP3,GCH1,GK,GNAS,HELZ2,IDH1,IFIH1,IRAK3,JAK2,MAP2K6,MAP3K20,MLKL,MX1,MX2,NAIP,NAV3,NME4,NSF,NT5C2,OAS1,OAS2,OAS3,OPLAH,PIP5K1B,PKN2,PLEKHG1,RALGPS2,RASGEF1B,RASGRP3,RIN2,RIOK3,RPS6KC1,SLC38A9,SMC6,SMCHD1,STRADB,SWAP70,TRPM4,TUBB6,UB…
GO:MF	ribonucleotide binding	GO:0032553	FALSE	2.81E-36	35.5511	2164	744	100	78724	ABCG2,ADCY6,ARL4A,ATP10D,BCAR3,BTK,C9ORF72,CDK14,CHD1,CHEK2,CMPK2,DDX3X,DDX60,DDX60L,DENND5B,DNAH8,DNM1,DOCK4,EIF2AK1,EIF2AK2,EIF2S3,EIF2S3B,ENTPD2,FGD4,GBP1,GBP3,GCH1,GK,GNAS,HELZ2,IFIH1,IRAK3,JAK2,MAP2K6,MAP3K20,MLKL,MX1,MX2,NAIP,NAV3,NME4,NSF,NT5C2,OAS1,OAS2,OAS3,OPLAH,PIP5K1B,PKN2,PLEKHG1,RALGPS2,RASGEF1B,RASGRP3,RIN2,RIOK3,RPS6KC1,SLC38A9,SMC6,SMCHD1,STRADB,SWAP70,TRPM4,TUBB6,UBE2L6,VRK2,WAR…
GO:MF	kinase binding	GO:0019900	FALSE	4.06E-32	31.3913	796	744	60	78724	ADCY6,ATP1B1,BANK1,BCAR3,BCL11A,BCL2L1,BLNK,CASP1,CAV1,CHEK2,DNM1,DOCK4,DUSP3,GCH1,HSPB1,IL31RA,IRAK3,JAK2,LYST,MAP2K6,MLKL,NAIP,NRG1,NSF,PDLIM5,PRLR,RASGRP3,RB1,RICTOR,SASH1,SMAD1,SP100,TRIM22,TRIM38,TRIM5,TRIM58,VRK2,WARS1,AKT1,AXIN1,CCND3,CD247,CDK5R1,DGKQ,DUSP2,ERBB2,FBXW5,FEZ1,MAD2L2,NELL2,PARP16,PDE3B,PER3,PFKFB1,PPP1R12C,RHOF,SKAP1,SPRED3,TOM1L2,TRADD
GO:MF	enzyme regulator activity	GO:0030234	FALSE	6.03E-32	31.2199	1339	744	75	78724	AIM2,ALDH1A1,ANOS1,ANXA5,ARHGAP24,ARHGAP44,BCAR3,BST2,BTK,C5,C9ORF72,CASP1,CAV1,CCNA1,CIP2A,COL4A3,CTSL,CTSV,CXCL10,DDX3X,DENND5B,DEPDC1B,DOCK4,DTX3L,EIF2AK2,EVI5,FGD4,GNAS,HSPB1,IL2,MAP3K20,MMP17,MOB3B,NAIP,NCKAP1L,NRG1,PARP9,PLEKHG1,PSME2,RALGPS2,RASAL2,RASGEF1B,RASGRP3,RGPD2,RICTOR,RIN2,SERPINB2,SERPING1,SERPINI2,SLC38A9,SNCA,STARD13,STRADB,SWAP70,WARS1,ACVR2B,AKT1,ARHGEF28,CCNB3,CCND3,CCNQ,CD…
GO:MF	molecular function activator activity	GO:0140677	FALSE	2.03E-30	29.6935	1177	744	69	78724	AIM2,ALDH1A1,ARHGAP24,ARHGAP44,ATP1B1,BTK,C5,C9ORF72,CASP1,CAV1,CD274,CD86,CTSL,CTSV,CXCL10,CXCL9,DDX3X,DEPDC1B,DOCK4,EVI5,GNAS,HGF,IFNE,IL15,IL1RN,IL2,IL7,INHBB,MACC1,MAP3K20,MMP17,MOB3B,NCKAP1L,NRG1,PNOC,PSME2,RASAL2,RASGRP3,RGPD2,RICTOR,RIN2,SEMA3C,STARD13,STRADB,TNFSF10,TNFSF13B,TNFSF15,WNT10A,WNT16,ACVR2B,AKT1,CCL28,CCL3L3,CCND3,CD320,CDK5R1,DGKQ,DLL1,GDF9,LLGL2,MANF,METRN,NDUFA13,NKX3-1,NOX…
GO:MF	signaling receptor binding	GO:0005102	FALSE	6.30E-30	29.2007	1521	744	77	78724	ADAM28,BANK1,BLNK,C5,CAV1,CCR2,CCRL2,CD151,CD22,CD274,CD86,CLEC7A,COL4A3,CXCL10,CXCL9,DOCK4,DUSP3,FAP,GNAS,HGF,HLA-DRA,IFNE,IL15,IL1RN,IL2,IL7,INHBB,ISG15,JAK2,MACC1,MARCHF1,MARCHF8,MARCO,MS4A1,NLGN1,NRG1,NSF,OSMR,PHIP,PIK3AP1,PLPP3,PLSCR1,PLSCR4,PNOC,RTP4,SEMA3C,STAT1,TLR10,TNFSF10,TNFSF13B,TNFSF15,TRAK2,WNT10A,WNT16,AKAP5,CCL28,CCL3L3,CD320,CDK5R1,DLL1,ERBB2,F2R,GDF9,KIR3DL2,KLRD1,LGR6,MANF,MET…
GO:MF	transferase activity, transferring phosphorus-containing groups	GO:0016772	FALSE	9.53E-29	28.0207	1176	744	67	78724	BTK,CAV1,CCNA1,CDK14,CHEK2,CMPK2,CXCL10,DDX3X,EIF2AK1,EIF2AK2,FGGY,GK,HSPB1,IL2,IRAK3,JAK2,MAP2K6,MAP3K20,MLKL,MOB3B,NCKAP1L,NME4,NRG1,NT5C2,OAS1,OAS2,OAS3,OASL,PARP12,PARP14,PARP9,PIGN,PIP5K1B,PKN2,PNPT1,POLK,RICTOR,RIOK3,RPS6KC1,SNCA,STRADB,TENT5A,TENT5C,VRK2,WARS1,ACVR2B,AK5,AKT1,CAMKK1,CCNB3,CCND3,CCNQ,CDK5R1,DAPK3,DGKK,DGKQ,EEF2K,ERBB2,LRGUK,MAPK9,NME3,PARP16,PFKFB1,PLK3,SBK1,TXK,WASHC1
GO:MF	DNA binding	GO:0003677	FALSE	1.71E-26	25.7665	2542	744	94	78724	ADAR,AIM2,AUNIP,BAZ2B,BCL11A,BEND6,BHLHE41,CHD1,CREB5,DDX3X,DDX60,E2F8,ETV7,H2BC18,H4C1,HELZ2,HESX1,HHEX,IFI16,IFIH1,IFIT5,IRF7,IRF9,KDM6A,MBD4,MIS18BP1,MXI1,NFIB,OASL,PAX5,PLSCR1,POLK,RB1,RBBP8,SHOC1,SMAD1,SMC6,SMCHD1,SNCA,SOX6,SP100,SP110,SP140,STAT1,STAT2,STRBP,SWAP70,TCF4,TFEC,TRPS1,XRN1,YBX3,ZBP1,ZBTB20,ZFAND5,ZFX,ZNF117,ZNF205,ZNF354A,ZNF638,ZNF705A,ZNF860,ASCL2,BAHD1,BNC2,ESRRA,GLI4,H2BK1,…
GO:MF	protein kinase binding	GO:0019901	FALSE	7.44E-26	25.1286	717	744	51	78724	ADCY6,ATP1B1,BANK1,BCL11A,BCL2L1,BLNK,CAV1,CHEK2,DNM1,DOCK4,DUSP3,GCH1,HSPB1,IL31RA,IRAK3,JAK2,LYST,MAP2K6,MLKL,NAIP,NRG1,NSF,PDLIM5,PRLR,RICTOR,SASH1,SMAD1,TRIM22,TRIM38,TRIM5,TRIM58,VRK2,WARS1,AKT1,AXIN1,CCND3,CD247,CDK5R1,DUSP2,ERBB2,FBXW5,FEZ1,MAD2L2,NELL2,PDE3B,PPP1R12C,RHOF,SKAP1,SPRED3,TOM1L2,TRADD
GO:MF	ribonucleoside triphosphate phosphatase activity	GO:0017111	FALSE	9.40E-26	25.0269	1201	744	64	78724	ABCG2,ALDH1A1,ARHGAP24,ARHGAP44,ARL4A,ATP10D,BCAR3,C9ORF72,CHD1,DDX3X,DDX60,DDX60L,DENND5B,DEPDC1B,DNAH8,DNM1,DOCK4,EIF2S3,EIF2S3B,ENTPD2,EVI5,FGD4,GBP1,GBP3,GCH1,GNAS,GNG10,HELZ2,IFIH1,MX1,MX2,NAIP,NAV3,NCKAP1L,NSF,PLEKHG1,RALGPS2,RASAL2,RASGEF1B,RASGRP3,RGPD2,RIN2,SHOC1,SLC38A9,SMC6,SMCHD1,SMPDL3A,STARD13,SWAP70,TUBB6,ARHGEF28,ARL4C,CARNS1,DOCK6,HSPA1L,KIFC2,LLGL2,NTPCR,PLEKHG4,RAB40B,RGS9,RHEB…
GO:MF	nucleic acid binding	GO:0003676	FALSE	1.15E-25	24.9385	5433	744	142	78724	ACO1,ADAR,AICDA,AIM2,APOBEC3A,AUNIP,BAZ2B,BCL11A,BEND6,BHLHE41,BST2,CASP7,CHD1,CREB5,DDX3X,DDX60,DDX60L,DNM1,E2F8,EIF2AK2,EIF2S3,EIF2S3B,ETV7,FECH,H2BC18,H4C1,HELZ2,HERC5,HESX1,HHEX,HNRNPH3,HSPB1,IFI16,IFIH1,IFIT1,IFIT2,IFIT5,IRF7,IRF9,KDM6A,MAP3K20,MBD4,MBNL3,MIS18BP1,MRPL12,MXI1,NDUFV3,NFIB,NSUN3,OAS1,OAS2,OAS3,OASL,PARP12,PAX5,PKN2,PLSCR1,PNPT1,POLK,PUS10,RB1,RBBP8,SAMD4A,SHOC1,SMAD1,SMC6,SMCH…
GO:MF	pyrophosphatase activity	GO:0016462	FALSE	2.24E-25	24.6504	1261	744	65	78724	ABCG2,ALDH1A1,ARHGAP24,ARHGAP44,ARL4A,ATP10D,BCAR3,C9ORF72,CHD1,DDX3X,DDX60,DDX60L,DENND5B,DEPDC1B,DNAH8,DNM1,DOCK4,EIF2S3,EIF2S3B,ENTPD2,EVI5,FGD4,GBP1,GBP3,GCH1,GNAS,GNG10,HELZ2,IFIH1,MX1,MX2,NAIP,NAV3,NCKAP1L,NSF,PLEKHG1,RALGPS2,RASAL2,RASGEF1B,RASGRP3,RGPD2,RIN2,SHOC1,SLC38A9,SMC6,SMCHD1,SMPDL3A,STARD13,SWAP70,TUBB6,ARHGEF28,ARL4C,CARNS1,DOCK6,HSPA1L,KIFC2,LLGL2,NTPCR,NUDT13,PLEKHG4,RAB40B,RG…
GO:MF	hydrolase activity, acting on acid anhydrides	GO:0016817	FALSE	2.34E-25	24.6312	1262	744	65	78724	ABCG2,ALDH1A1,ARHGAP24,ARHGAP44,ARL4A,ATP10D,BCAR3,C9ORF72,CHD1,DDX3X,DDX60,DDX60L,DENND5B,DEPDC1B,DNAH8,DNM1,DOCK4,EIF2S3,EIF2S3B,ENTPD2,EVI5,FGD4,GBP1,GBP3,GCH1,GNAS,GNG10,HELZ2,IFIH1,MX1,MX2,NAIP,NAV3,NCKAP1L,NSF,PLEKHG1,RALGPS2,RASAL2,RASGEF1B,RASGRP3,RGPD2,RIN2,SHOC1,SLC38A9,SMC6,SMCHD1,SMPDL3A,STARD13,SWAP70,TUBB6,ARHGEF28,ARL4C,CARNS1,DOCK6,HSPA1L,KIFC2,LLGL2,NTPCR,NUDT13,PLEKHG4,RAB40B,RG…
GO:MF	hydrolase activity, acting on acid anhydrides, in phosphorus-containing anhydrides	GO:0016818	FALSE	2.34E-25	24.6312	1262	744	65	78724	ABCG2,ALDH1A1,ARHGAP24,ARHGAP44,ARL4A,ATP10D,BCAR3,C9ORF72,CHD1,DDX3X,DDX60,DDX60L,DENND5B,DEPDC1B,DNAH8,DNM1,DOCK4,EIF2S3,EIF2S3B,ENTPD2,EVI5,FGD4,GBP1,GBP3,GCH1,GNAS,GNG10,HELZ2,IFIH1,MX1,MX2,NAIP,NAV3,NCKAP1L,NSF,PLEKHG1,RALGPS2,RASAL2,RASGEF1B,RASGRP3,RGPD2,RIN2,SHOC1,SLC38A9,SMC6,SMCHD1,SMPDL3A,STARD13,SWAP70,TUBB6,ARHGEF28,ARL4C,CARNS1,DOCK6,HSPA1L,KIFC2,LLGL2,NTPCR,NUDT13,PLEKHG4,RAB40B,RG…
GO:MF	adenyl ribonucleotide binding	GO:0032559	FALSE	1.10E-24	23.9591	1558	744	71	78724	ABCG2,ADCY6,ATP10D,BTK,CDK14,CHD1,CHEK2,CMPK2,DDX3X,DDX60,DDX60L,DNAH8,EIF2AK1,EIF2AK2,ENTPD2,GK,HELZ2,IFIH1,IRAK3,JAK2,MAP2K6,MAP3K20,MLKL,NAIP,NAV3,NME4,NSF,NT5C2,OAS1,OAS2,OAS3,OPLAH,PIP5K1B,PKN2,RIOK3,RPS6KC1,SMC6,SMCHD1,STRADB,SWAP70,TRPM4,UBE2L6,VRK2,WARS1,ACVR2B,AK5,AKT1,BAG3,CAMKK1,CARNS1,DAPK3,DGKK,DGKQ,EEF2K,ERBB2,FPGS,GAL3ST4,HSPA1L,KIFC2,LRGUK,MAPK9,MMAB,MYO6,NDUFA13,NME3,NTPCR,PFKFB1…
GO:MF	ATP binding	GO:0005524	FALSE	1.21E-24	23.9167	1516	744	70	78724	ABCG2,ADCY6,ATP10D,BTK,CDK14,CHD1,CHEK2,CMPK2,DDX3X,DDX60,DDX60L,DNAH8,EIF2AK1,EIF2AK2,ENTPD2,GK,HELZ2,IFIH1,IRAK3,JAK2,MAP2K6,MAP3K20,MLKL,NAIP,NAV3,NME4,NSF,NT5C2,OAS1,OAS2,OAS3,OPLAH,PIP5K1B,PKN2,RIOK3,RPS6KC1,SMC6,SMCHD1,STRADB,SWAP70,TRPM4,UBE2L6,VRK2,WARS1,ACVR2B,AK5,AKT1,BAG3,CAMKK1,CARNS1,DAPK3,DGKK,DGKQ,EEF2K,ERBB2,FPGS,HSPA1L,KIFC2,LRGUK,MAPK9,MMAB,MYO6,NDUFA13,NME3,NTPCR,PFKFB1,PLK3,RI…
GO:MF	adenyl nucleotide binding	GO:0030554	FALSE	1.21E-24	23.9166	1651	744	73	78724	ABCG2,ADCY6,ALDH1A1,ATP10D,BTK,CDK14,CHD1,CHEK2,CMPK2,DDX3X,DDX60,DDX60L,DNAH8,EIF2AK1,EIF2AK2,ENTPD2,GK,HELZ2,IDH1,IFIH1,IRAK3,JAK2,MAP2K6,MAP3K20,MLKL,NAIP,NAV3,NME4,NSF,NT5C2,OAS1,OAS2,OAS3,OPLAH,PIP5K1B,PKN2,RIOK3,RPS6KC1,SMC6,SMCHD1,STRADB,SWAP70,TRPM4,UBE2L6,VRK2,WARS1,ACVR2B,AK5,AKT1,BAG3,CAMKK1,CARNS1,DAPK3,DGKK,DGKQ,EEF2K,ERBB2,FPGS,GAL3ST4,HSPA1L,KIFC2,LRGUK,MAPK9,MMAB,MYO6,NDUFA13,NME3…
GO:MF	protein dimerization activity	GO:0046983	FALSE	3.17E-23	22.4983	1126	744	59	78724	ABCG2,ANO5,ATP1B1,BCL11A,BCL2L1,BHLHE41,BST2,CAV1,CHEK2,CIP2A,CLCN1,CYBB,DIAPH3,DNM1,EIF2AK1,FAP,FECH,GBP1,GBP3,GCH1,H2BC18,H4C1,HESX1,HHEX,HSD17B4,HSPB1,IDH1,INHBB,IRAK3,MXI1,PTPRO,S100A10,SMCHD1,SOX6,SP100,STAT1,TCF4,TFEC,TRIM22,TRIM38,TRIM5,TRIM58,WARS1,AKT1,ASCL2,AXIN1,CBS,CD247,DAPK3,EPHX2,ERBB2,H2BK1,LDB1,MGAT4A,NAA60,NECTIN1,NPAS2,PRMT2,S100B
GO:MF	kinase activity	GO:0016301	FALSE	1.56E-22	21.8074	1000	744	55	78724	BTK,CAV1,CCNA1,CDK14,CHEK2,CMPK2,CXCL10,DDX3X,EIF2AK1,EIF2AK2,FGGY,GK,HSPB1,IL2,IRAK3,JAK2,MAP2K6,MAP3K20,MLKL,MOB3B,NCKAP1L,NME4,NRG1,NT5C2,PIP5K1B,PKN2,RICTOR,RIOK3,RPS6KC1,SNCA,STRADB,VRK2,WARS1,ACVR2B,AK5,AKT1,CAMKK1,CCNB3,CCND3,CCNQ,CDK5R1,DAPK3,DGKK,DGKQ,EEF2K,ERBB2,LRGUK,MAPK9,NME3,PARP16,PFKFB1,PLK3,SBK1,TXK,WASHC1
GO:MF	protein homodimerization activity	GO:0042803	FALSE	5.96E-21	20.225	731	744	46	78724	ABCG2,BCL11A,BCL2L1,BHLHE41,BST2,CHEK2,CIP2A,CLCN1,DIAPH3,DNM1,EIF2AK1,FAP,FECH,GBP1,GBP3,GCH1,HESX1,HHEX,HSD17B4,HSPB1,IDH1,INHBB,IRAK3,PTPRO,S100A10,SMCHD1,SOX6,SP100,STAT1,TRIM22,TRIM38,TRIM5,TRIM58,WARS1,AKT1,AXIN1,CBS,CD247,DAPK3,EPHX2,LDB1,MGAT4A,NAA60,NECTIN1,PRMT2,S100B
GO:MF	zinc ion binding	GO:0008270	FALSE	1.05E-19	18.9768	861	744	48	78724	AICDA,APOBEC3A,BLVRA,CA1,CALB1,GCH1,IFIH1,MARCHF1,MARCHF3,MARCHF8,MIB1,MMP17,PLSCR1,SIAH2,SMPDL3A,SNCA,TNFSF10,TRIM22,TRIM38,TRIM5,TRIM58,TRPS1,WDFY1,XAF1,ZCCHC2,ZFAND4,ZFAND5,ZNF117,ZNF205,ZNF385B,ZNF638,APOBEC3H,BNC2,CA11,CA6,CDO1,ESRRA,NR1D2,NR2F6,RASSF1,RNPEPL1,S100B,TCEA3,THAP11,TRIM32,ZMAT4,ZNF208,ZNF212
GO:MF	transcription regulator activity	GO:0140110	FALSE	4.84E-19	18.3149	1954	744	71	78724	BCL11A,BEND6,BHLHE41,CD274,CREB5,E2F8,EAF2,ENSG00000288721,ETV7,HESX1,HHEX,IL31RA,IRF7,IRF9,LMO2,MXI1,NFIB,NRG1,PARP14,PARP9,PAWR,PAX5,PLSCR1,RB1,RBBP8,SIAH2,SMAD1,SOX6,SP100,SP110,SP140,STAT1,STAT2,TCF4,TFEC,TRIM22,TRIM38,TRIM5,TRPS1,ZBTB20,ZFX,ZNF117,ZNF205,ZNF354A,ZNF705A,ZNF860,ASCL2,ESRRA,GLI4,LDB1,MAFF,MED27,NFATC2,NKX3-1,NPAS2,NR1D2,NR2F6,PER2,PRMT2,SMAD7,TBX21,THAP11,TRIM32,ZBTB45,ZFPM1,Z…
GO:MF	molecular adaptor activity	GO:0060090	FALSE	1.26E-18	17.9012	1212	744	55	78724	AIM2,AP1S2,AP1S3,ATP1B1,BANK1,BCL11A,BEND6,BLNK,CAV1,CD274,COL19A1,DCAF12,DDX3X,DTX3L,ENSG00000288721,EPB41L3,FCRL2,GAS2L3,GNB4,GOLPH3L,IFI27,IL31RA,LMO2,NRG1,PARP14,PARP9,PAWR,RB1,RBBP8,RICTOR,SASH1,SCIMP,SIAH2,SNCA,TRIM22,TRIM38,TRIM5,USP18,AKAP5,ARRDC4,AXIN1,DAB1,KIR3DL1,KLHDC3,LDB1,MED27,NFATC2,PER2,PRMT2,SH2D1B,SMAD7,TMEM250,TRADD,TRIM32,ZFPM1
GO:MF	GTPase activity	GO:0003924	FALSE	1.30E-18	17.8863	796	744	45	78724	ALDH1A1,ARHGAP24,ARHGAP44,ARL4A,BCAR3,C9ORF72,DDX3X,DENND5B,DEPDC1B,DNM1,DOCK4,EIF2S3,EIF2S3B,EVI5,FGD4,GBP1,GBP3,GCH1,GNAS,GNG10,MX1,MX2,NCKAP1L,PLEKHG1,RALGPS2,RASAL2,RASGEF1B,RASGRP3,RGPD2,RIN2,SLC38A9,STARD13,SWAP70,TUBB6,ARHGEF28,ARL4C,DOCK6,LLGL2,NTPCR,PLEKHG4,RAB40B,RGS9,RHEBL1,RHOF,TMEM250
GO:MF	phosphotransferase activity, alcohol group as acceptor	GO:0016773	FALSE	5.45E-18	17.2636	906	744	47	78724	BTK,CAV1,CCNA1,CDK14,CHEK2,CXCL10,DDX3X,EIF2AK1,EIF2AK2,FGGY,GK,HSPB1,IRAK3,JAK2,MAP2K6,MAP3K20,MLKL,MOB3B,NCKAP1L,NRG1,NT5C2,PIP5K1B,PKN2,RICTOR,RIOK3,RPS6KC1,SNCA,STRADB,VRK2,ACVR2B,AKT1,CAMKK1,CCNB3,CCND3,CCNQ,CDK5R1,DAPK3,DGKK,DGKQ,EEF2K,ERBB2,MAPK9,PARP16,PFKFB1,PLK3,SBK1,TXK
GO:MF	enzyme activator activity	GO:0008047	FALSE	8.94E-18	17.0488	610	744	39	78724	AIM2,ALDH1A1,ARHGAP24,ARHGAP44,BTK,C9ORF72,CASP1,CAV1,CTSL,CTSV,DDX3X,DEPDC1B,DOCK4,EVI5,GNAS,IL2,MAP3K20,MMP17,MOB3B,NCKAP1L,NRG1,PSME2,RASAL2,RASGRP3,RGPD2,RICTOR,RIN2,STARD13,STRADB,ACVR2B,CCND3,CDK5R1,DGKQ,LLGL2,NDUFA13,NKX3-1,NOXA1,PARP16,RGS9
GO:MF	transition metal ion binding	GO:0046914	FALSE	7.08E-17	16.1501	1141	744	51	78724	AICDA,APOBEC3A,BLVRA,CA1,CALB1,FECH,GCH1,IFIH1,LACC1,LAP3,MARCHF1,MARCHF3,MARCHF8,MIB1,MMP17,PLSCR1,SIAH2,SMPDL3A,SNCA,TNFSF10,TRIM22,TRIM38,TRIM5,TRIM58,TRPS1,WDFY1,XAF1,ZCCHC2,ZFAND4,ZFAND5,ZNF117,ZNF205,ZNF385B,ZNF638,APOBEC3H,BNC2,CA11,CA6,CDO1,ESRRA,NR1D2,NR2F6,RASSF1,RNPEPL1,S100B,TCEA3,THAP11,TRIM32,ZMAT4,ZNF208,ZNF212
GO:MF	lipid binding	GO:0008289	FALSE	8.48E-16	15.0718	857	744	43	78724	ANXA5,APOL6,ARHGAP44,BLNK,BTK,CALB1,CAV1,CD1C,CPNE8,DAPP1,DNM1,FFAR2,GBP1,GOLPH3L,IL2,NME4,OSBPL10,OSBPL1A,PRLR,RASGRP3,RPS6KC1,RUBCNL,SESTD1,SGIP1,SLC38A9,SNCA,SNX22,STARD13,TLR10,TSPO2,WDFY1,ZCCHC2,ACADVL,AKT1,CD1B,ESRRA,MANF,PAFAH2,SMPD3,SPON2,SULT1E1,TOM1L2,ZFYVE28
GO:MF	protein kinase activity	GO:0004672	FALSE	1.38E-15	14.859	786	744	41	78724	BTK,CAV1,CCNA1,CDK14,CHEK2,CXCL10,DDX3X,EIF2AK1,EIF2AK2,HSPB1,IRAK3,JAK2,MAP2K6,MAP3K20,MLKL,MOB3B,NCKAP1L,NRG1,PKN2,RICTOR,RIOK3,RPS6KC1,SNCA,STRADB,VRK2,ACVR2B,AKT1,CAMKK1,CCNB3,CCND3,CCNQ,CDK5R1,DAPK3,DGKQ,EEF2K,ERBB2,MAPK9,PARP16,PLK3,SBK1,TXK
GO:MF	double-stranded DNA binding	GO:0003690	FALSE	2.84E-15	14.546	1644	744	59	78724	AIM2,BCL11A,BHLHE41,CREB5,DDX60,E2F8,ETV7,HESX1,HHEX,IFI16,IFIT5,IRF7,IRF9,KDM6A,MBD4,MXI1,NFIB,PAX5,RB1,SMAD1,SNCA,SOX6,STAT1,STAT2,TCF4,TFEC,TRPS1,YBX3,ZBP1,ZBTB20,ZFX,ZNF117,ZNF205,ZNF354A,ZNF638,ZNF705A,ZNF860,ASCL2,BAHD1,BNC2,ESRRA,GLI4,MAFF,NFATC2,NKX3-1,NPAS2,NR1D2,NR2F6,PER2,PER3,TBX21,THAP11,ZBTB45,ZNF208,ZNF212,ZNF266,ZNF575,ZNF76,ZSCAN23
GO:MF	transmembrane signaling receptor activity	GO:0004888	FALSE	1.95E-14	13.71	1307	744	51	78724	BCAM,C3AR1,CALCRL,CCR2,CCRL2,CLEC10A,CLEC1A,FCGR2B,FCRL2,FCRL5,FCRLA,FFAR2,FPR3,HLA-DRA,IL31RA,LY6E,LYPD6B,MARCO,MILR1,MRC1,NRG1,NTSR1,OR2I1P,OR2W3,OR52K1,OSMR,PRLR,PROKR2,PTPRF,PTPRO,SLAMF1,TLR10,ACVR2B,ADGRG5,CD247,DGKQ,ERBB2,F2R,GNRHR,GPR176,IL2RB,KIR3DL1,KLRD1,KLRF1,LGR6,MRGPRX2,NMUR1,PTGDR,PTGDR2,S1PR5,TACR2
GO:MF	protein-macromolecule adaptor activity	GO:0030674	FALSE	2.80E-14	13.5535	1034	744	45	78724	AIM2,AP1S2,AP1S3,ATP1B1,BANK1,BCL11A,BEND6,BLNK,CAV1,CD274,COL19A1,DCAF12,DDX3X,DTX3L,ENSG00000288721,EPB41L3,FCRL2,GAS2L3,GNB4,GOLPH3L,IL31RA,LMO2,NRG1,PARP14,PARP9,PAWR,RB1,RBBP8,SIAH2,TRIM22,TRIM38,TRIM5,ARRDC4,AXIN1,DAB1,KLHDC3,LDB1,MED27,PER2,PRMT2,SH2D1B,SMAD7,TRADD,TRIM32,ZFPM1
GO:MF	cytoskeletal protein binding	GO:0008092	FALSE	4.37E-14	13.3593	1001	744	44	78724	CCDC181,COBLL1,DDX3X,DIAPH3,DNAI7,DNM1,DUSP3,EML6,EPB41L3,FGD4,FRMD3,GAS2L3,GBP1,MAP2,MX1,MX2,NAV3,NEXN,PAWR,PDLIM5,SGIP1,SMTNL1,SNCA,SPTA1,STRBP,TMOD2,TPPP3,TRAK2,ARL4C,CDK5R1,EML5,FEZ1,FMN1,KIFC2,LLGL2,MYO6,NDN,NRCAM,REEP2,S100B,TMSB15B,TRIM32,WASH6P,WASHC1
GO:MF	signaling receptor regulator activity	GO:0030545	FALSE	2.80E-13	12.5535	583	744	33	78724	C5,CD274,CD86,CXCL10,CXCL9,HGF,IFNE,IL15,IL1RN,IL2,IL7,INHBB,LY6E,LYPD6B,MACC1,NRG1,PNOC,SEMA3C,TNFSF10,TNFSF13B,TNFSF15,WNT10A,WNT16,CCL28,CCL3L3,CD320,DGKQ,DLL1,GDF9,MANF,METRN,PDGFD,SCGB3A1
GO:MF	protein-containing complex binding	GO:0044877	FALSE	4.77E-13	12.3216	1314	744	49	78724	ATP1B1,CAV1,CD151,CD22,COL4A3,CTSL,DDX3X,FAP,FCGR2B,GAS2L3,GBP1,GCH1,GNAS,GNB4,HLA-DMA,HLA-DMB,HLA-DRA,IFIH1,IFNE,ISG15,KCNH7,MAP3K20,MLKL,MS4A1,MSR1,NASP,NCKAP1L,NEXN,NRG1,NSF,NTSR1,PLPP3,PTPRF,RICTOR,SLFN12,SNCA,SPTA1,YBX3,ACVR2B,AJAP1,BAG3,CDK5R1,KLRD1,MYO6,NECTIN1,PRMT2,SMAD7,TRADD,TUB
GO:MF	sequence-specific double-stranded DNA binding	GO:1990837	FALSE	9.85E-13	12.0067	1547	744	53	78724	BCL11A,BHLHE41,CREB5,E2F8,ETV7,HESX1,HHEX,IRF7,IRF9,KDM6A,MBD4,MXI1,NFIB,PAX5,RB1,SMAD1,SNCA,SOX6,STAT1,STAT2,TCF4,TFEC,TRPS1,YBX3,ZBTB20,ZFX,ZNF117,ZNF205,ZNF354A,ZNF705A,ZNF860,ASCL2,BAHD1,BNC2,ESRRA,GLI4,MAFF,NFATC2,NKX3-1,NPAS2,NR1D2,NR2F6,PER2,PER3,TBX21,THAP11,ZBTB45,ZNF208,ZNF212,ZNF266,ZNF575,ZNF76,ZSCAN23
GO:MF	signaling receptor activator activity	GO:0030546	FALSE	1.99E-12	11.7007	546	744	31	78724	C5,CD274,CD86,CXCL10,CXCL9,HGF,IFNE,IL15,IL1RN,IL2,IL7,INHBB,MACC1,NRG1,PNOC,SEMA3C,TNFSF10,TNFSF13B,TNFSF15,WNT10A,WNT16,CCL28,CCL3L3,CD320,DGKQ,DLL1,GDF9,MANF,METRN,PDGFD,SCGB3A1
GO:MF	kinase regulator activity	GO:0019207	FALSE	2.82E-12	11.5492	278	744	23	78724	CAV1,CCNA1,CXCL10,DDX3X,HSPB1,IL2,MAP3K20,MOB3B,NCKAP1L,NRG1,RICTOR,SNCA,STRADB,WARS1,ACVR2B,AKT1,CCNB3,CCND3,CCNQ,CDK5R1,DGKQ,PARP16,WASHC1
GO:MF	transcription cis-regulatory region binding	GO:0000976	FALSE	3.10E-12	11.5083	1485	744	51	78724	BCL11A,BHLHE41,CREB5,E2F8,ETV7,HESX1,HHEX,IRF7,IRF9,KDM6A,MXI1,NFIB,PAX5,RB1,SMAD1,SNCA,SOX6,STAT1,STAT2,TCF4,TFEC,TRPS1,YBX3,ZBTB20,ZFX,ZNF117,ZNF205,ZNF354A,ZNF705A,ZNF860,ASCL2,BAHD1,ESRRA,GLI4,MAFF,NFATC2,NKX3-1,NPAS2,NR1D2,NR2F6,PER2,PER3,TBX21,THAP11,ZBTB45,ZNF208,ZNF212,ZNF266,ZNF575,ZNF76,ZSCAN23
GO:MF	transcription regulatory region nucleic acid binding	GO:0001067	FALSE	3.18E-12	11.497	1486	744	51	78724	BCL11A,BHLHE41,CREB5,E2F8,ETV7,HESX1,HHEX,IRF7,IRF9,KDM6A,MXI1,NFIB,PAX5,RB1,SMAD1,SNCA,SOX6,STAT1,STAT2,TCF4,TFEC,TRPS1,YBX3,ZBTB20,ZFX,ZNF117,ZNF205,ZNF354A,ZNF705A,ZNF860,ASCL2,BAHD1,ESRRA,GLI4,MAFF,NFATC2,NKX3-1,NPAS2,NR1D2,NR2F6,PER2,PER3,TBX21,THAP11,ZBTB45,ZNF208,ZNF212,ZNF266,ZNF575,ZNF76,ZSCAN23
GO:MF	DNA-binding transcription factor activity, RNA polymerase II-specific	GO:0000981	FALSE	7.34E-12	11.1341	1360	744	48	78724	BCL11A,BHLHE41,CREB5,E2F8,ETV7,HESX1,HHEX,IRF7,IRF9,MXI1,NFIB,PAX5,PLSCR1,SMAD1,SOX6,SP100,SP110,SP140,STAT1,STAT2,TCF4,TFEC,TRPS1,ZBTB20,ZFX,ZNF117,ZNF205,ZNF354A,ZNF705A,ZNF860,ASCL2,ESRRA,GLI4,MAFF,NFATC2,NKX3-1,NPAS2,NR1D2,NR2F6,TBX21,THAP11,ZBTB45,ZNF208,ZNF212,ZNF266,ZNF575,ZNF76,ZSCAN23
GO:MF	protein domain specific binding	GO:0019904	FALSE	7.66E-12	11.1157	655	744	33	78724	BCL2L1,BLNK,CASP1,CD40,DOCK4,JAK2,LRRFIP2,MPP3,NLGN1,NSF,PAWR,PLSCR1,PLSCR4,RB1,SGIP1,SLAMF1,SMTNL1,SP100,TRPS1,VRK2,WARS1,AKAP5,AXIN1,DAPK3,ESRRA,FMN1,LDB1,LLGL2,NKX3-1,NOXA1,SKAP1,SYNJ2,TRADD
GO:MF	peptidase activity	GO:0008233	FALSE	9.08E-12	11.0421	832	744	37	78724	ADAM28,AIM2,ANOS1,BST2,C5,CASP1,CASP7,CAV1,COL4A3,CPVL,CTSE,CTSL,CTSV,FAP,HGF,LACTB,LAP3,MMP17,NAIP,PSME2,SERPINB2,SERPING1,SERPINI2,USP18,USP25,CAPN12,CAPN5,CAPN8,CTSW,GZMB,GZMM,NDUFA13,NKX3-1,PRSS23,PRSS33,RNPEPL1,ST14
GO:MF	receptor ligand activity	GO:0048018	FALSE	9.33E-12	11.0299	539	744	30	78724	C5,CD274,CD86,CXCL10,CXCL9,HGF,IFNE,IL15,IL1RN,IL2,IL7,INHBB,MACC1,NRG1,PNOC,SEMA3C,TNFSF10,TNFSF13B,TNFSF15,WNT10A,WNT16,CCL28,CCL3L3,CD320,DLL1,GDF9,MANF,METRN,PDGFD,SCGB3A1
GO:MF	sequence-specific DNA binding	GO:0043565	FALSE	1.52E-11	10.8185	1657	744	53	78724	BCL11A,BHLHE41,CREB5,E2F8,ETV7,HESX1,HHEX,IRF7,IRF9,KDM6A,MBD4,MXI1,NFIB,PAX5,RB1,SMAD1,SNCA,SOX6,STAT1,STAT2,TCF4,TFEC,TRPS1,YBX3,ZBTB20,ZFX,ZNF117,ZNF205,ZNF354A,ZNF705A,ZNF860,ASCL2,BAHD1,BNC2,ESRRA,GLI4,MAFF,NFATC2,NKX3-1,NPAS2,NR1D2,NR2F6,PER2,PER3,TBX21,THAP11,ZBTB45,ZNF208,ZNF212,ZNF266,ZNF575,ZNF76,ZSCAN23
GO:MF	protein serine/threonine kinase activity	GO:0004674	FALSE	2.19E-11	10.6592	557	744	30	78724	CCNA1,CDK14,CHEK2,CXCL10,DDX3X,EIF2AK1,EIF2AK2,HSPB1,IRAK3,MAP2K6,MAP3K20,PKN2,RICTOR,RIOK3,RPS6KC1,STRADB,VRK2,ACVR2B,AKT1,CAMKK1,CCNB3,CCND3,CCNQ,CDK5R1,DAPK3,EEF2K,MAPK9,PARP16,PLK3,SBK1
GO:MF	transcription factor binding	GO:0008134	FALSE	2.38E-11	10.6227	599	744	31	78724	BCL11A,BHLHE41,DDX3X,DTX3L,HHEX,HSPB1,IFI16,IFI27,LMO2,OASL,PARP9,RB1,RBBP8,SP100,STAT1,TCF4,TXLNG,ASCL2,CAND2,DAPK3,DGKQ,DLL1,LDB1,MAD2L2,NKX3-1,PER2,PER3,PHF1,PRMT2,TRIM32,ZFPM1
GO:MF	hydrolase activity, acting on ester bonds	GO:0016788	FALSE	3.69E-11	10.4331	918	744	38	78724	ACOT9,ANXA5,BTK,CA1,CIP2A,DUSP3,EIF2AK2,HELZ2,MBD4,NT5C2,PDP1,PLPP3,PLSCR1,PNPLA4,PNPT1,PTPRF,PTPRO,PUDP,RBBP8,SLFN12,SMPDL3A,XRN1,ACOT2,DUSP2,EPHX2,MUS81,PAFAH2,PDE3B,PDE9A,PFKFB1,PLCH2,PNPLA7,PPP1R12C,PPP2R2B,PTP4A3,PTPN7,SMPD3,SYNJ2
GO:MF	RNA polymerase II transcription regulatory region sequence-specific DNA binding	GO:0000977	FALSE	6.00E-11	10.2216	1387	744	47	78724	BCL11A,BHLHE41,CREB5,E2F8,ETV7,HESX1,HHEX,IRF7,IRF9,KDM6A,MXI1,NFIB,PAX5,RB1,SMAD1,SOX6,STAT1,STAT2,TCF4,TFEC,TRPS1,YBX3,ZBTB20,ZFX,ZNF117,ZNF205,ZNF354A,ZNF705A,ZNF860,ASCL2,ESRRA,GLI4,MAFF,NFATC2,NKX3-1,NPAS2,NR1D2,NR2F6,TBX21,THAP11,ZBTB45,ZNF208,ZNF212,ZNF266,ZNF575,ZNF76,ZSCAN23
GO:MF	tubulin binding	GO:0015631	FALSE	7.11E-11	10.1479	392	744	25	78724	CCDC181,DDX3X,DIAPH3,DNAI7,DNM1,EML6,GAS2L3,MAP2,MX1,MX2,NAV3,SGIP1,SNCA,STRBP,TPPP3,ARL4C,CDK5R1,EML5,FEZ1,FMN1,KIFC2,NDN,REEP2,WASH6P,WASHC1
GO:MF	DNA-binding transcription factor activity	GO:0003700	FALSE	7.23E-11	10.1408	1448	744	48	78724	BCL11A,BHLHE41,CREB5,E2F8,ETV7,HESX1,HHEX,IRF7,IRF9,MXI1,NFIB,PAX5,PLSCR1,SMAD1,SOX6,SP100,SP110,SP140,STAT1,STAT2,TCF4,TFEC,TRPS1,ZBTB20,ZFX,ZNF117,ZNF205,ZNF354A,ZNF705A,ZNF860,ASCL2,ESRRA,GLI4,MAFF,NFATC2,NKX3-1,NPAS2,NR1D2,NR2F6,TBX21,THAP11,ZBTB45,ZNF208,ZNF212,ZNF266,ZNF575,ZNF76,ZSCAN23
GO:MF	GTP binding	GO:0005525	FALSE	2.66E-10	9.57566	614	744	30	78724	ARL4A,BCAR3,C9ORF72,DENND5B,DNM1,DOCK4,EIF2S3,EIF2S3B,FGD4,GBP1,GBP3,GCH1,GNAS,MX1,MX2,PLEKHG1,RALGPS2,RASGEF1B,RASGRP3,RIN2,SLC38A9,SWAP70,TUBB6,ARHGEF28,ARL4C,DOCK6,PLEKHG4,RAB40B,RHEBL1,RHOF
GO:MF	endopeptidase activity	GO:0004175	FALSE	3.11E-10	9.50658	576	744	29	78724	ADAM28,AIM2,ANOS1,BST2,C5,CASP1,CASP7,COL4A3,CTSE,CTSL,CTSV,FAP,HGF,MMP17,NAIP,PSME2,SERPINB2,SERPING1,SERPINI2,CAPN12,CAPN5,CAPN8,CTSW,GZMB,GZMM,NDUFA13,PRSS23,PRSS33,ST14
GO:MF	nucleoside-triphosphatase regulator activity	GO:0060589	FALSE	3.71E-10	9.43119	499	744	27	78724	ALDH1A1,ARHGAP24,ARHGAP44,BCAR3,C9ORF72,DENND5B,DEPDC1B,DOCK4,EVI5,FGD4,NCKAP1L,PLEKHG1,RALGPS2,RASAL2,RASGEF1B,RASGRP3,RGPD2,RIN2,SLC38A9,STARD13,SWAP70,ARHGEF28,DOCK6,LLGL2,PLEKHG4,RGS9,RHOF
GO:MF	GTPase regulator activity	GO:0030695	FALSE	3.71E-10	9.43119	499	744	27	78724	ALDH1A1,ARHGAP24,ARHGAP44,BCAR3,C9ORF72,DENND5B,DEPDC1B,DOCK4,EVI5,FGD4,NCKAP1L,PLEKHG1,RALGPS2,RASAL2,RASGEF1B,RASGRP3,RGPD2,RIN2,SLC38A9,STARD13,SWAP70,ARHGEF28,DOCK6,LLGL2,PLEKHG4,RGS9,RHOF
GO:MF	ubiquitin-like protein ligase binding	GO:0044389	FALSE	6.02E-10	9.22035	324	744	22	78724	AICDA,CCDC50,CD40,CHEK2,DTX3L,FANCL,ISG15,PARP9,RB1,SMAD1,SMC6,STAT1,STAT2,UBE2L6,USP25,AXIN1,CBS,HSPA1L,PER3,PRR5L,SMAD7,WASHC1
GO:MF	RNA polymerase II cis-regulatory region sequence-specific DNA binding	GO:0000978	FALSE	1.14E-09	8.94165	1183	744	41	78724	BCL11A,BHLHE41,CREB5,E2F8,HESX1,HHEX,IRF7,IRF9,KDM6A,MXI1,NFIB,PAX5,SMAD1,SOX6,STAT1,STAT2,TCF4,TFEC,ZBTB20,ZFX,ZNF117,ZNF205,ZNF354A,ZNF860,ASCL2,ESRRA,GLI4,MAFF,NFATC2,NKX3-1,NPAS2,NR1D2,NR2F6,TBX21,THAP11,ZBTB45,ZNF208,ZNF212,ZNF575,ZNF76,ZSCAN23
GO:MF	guanyl nucleotide binding	GO:0019001	FALSE	1.16E-09	8.93705	651	744	30	78724	ARL4A,BCAR3,C9ORF72,DENND5B,DNM1,DOCK4,EIF2S3,EIF2S3B,FGD4,GBP1,GBP3,GCH1,GNAS,MX1,MX2,PLEKHG1,RALGPS2,RASGEF1B,RASGRP3,RIN2,SLC38A9,SWAP70,TUBB6,ARHGEF28,ARL4C,DOCK6,PLEKHG4,RAB40B,RHEBL1,RHOF
GO:MF	guanyl ribonucleotide binding	GO:0032561	FALSE	1.16E-09	8.93705	651	744	30	78724	ARL4A,BCAR3,C9ORF72,DENND5B,DNM1,DOCK4,EIF2S3,EIF2S3B,FGD4,GBP1,GBP3,GCH1,GNAS,MX1,MX2,PLEKHG1,RALGPS2,RASGEF1B,RASGRP3,RIN2,SLC38A9,SWAP70,TUBB6,ARHGEF28,ARL4C,DOCK6,PLEKHG4,RAB40B,RHEBL1,RHOF
GO:MF	cytokine activity	GO:0005125	FALSE	1.24E-09	8.90665	238	744	19	78724	C5,CXCL10,CXCL9,IFNE,IL15,IL1RN,IL2,IL7,INHBB,NRG1,TNFSF10,TNFSF13B,TNFSF15,WNT10A,WNT16,CCL28,CCL3L3,GDF9,SCGB3A1
GO:MF	protein kinase regulator activity	GO:0019887	FALSE	1.44E-09	8.84247	240	744	19	78724	CAV1,CCNA1,CXCL10,DDX3X,HSPB1,MAP3K20,MOB3B,NCKAP1L,NRG1,RICTOR,SNCA,STRADB,AKT1,CCNB3,CCND3,CCNQ,CDK5R1,DGKQ,PARP16
GO:MF	cis-regulatory region sequence-specific DNA binding	GO:0000987	FALSE	2.08E-09	8.68101	1206	744	41	78724	BCL11A,BHLHE41,CREB5,E2F8,HESX1,HHEX,IRF7,IRF9,KDM6A,MXI1,NFIB,PAX5,SMAD1,SOX6,STAT1,STAT2,TCF4,TFEC,ZBTB20,ZFX,ZNF117,ZNF205,ZNF354A,ZNF860,ASCL2,ESRRA,GLI4,MAFF,NFATC2,NKX3-1,NPAS2,NR1D2,NR2F6,TBX21,THAP11,ZBTB45,ZNF208,ZNF212,ZNF575,ZNF76,ZSCAN23
GO:MF	cytokine receptor binding	GO:0005126	FALSE	2.23E-09	8.65082	278	744	20	78724	C5,CCR2,CCRL2,CXCL10,CXCL9,IFNE,IL15,IL1RN,IL2,IL7,JAK2,OSMR,STAT1,TNFSF10,TNFSF13B,TNFSF15,CCL28,CCL3L3,SMAD7,TRADD
GO:MF	double-stranded RNA binding	GO:0003725	FALSE	2.81E-09	8.55168	73	744	12	78724	ADAR,DDX60,DDX60L,EIF2AK2,IFIH1,OAS1,OAS2,OAS3,OASL,STRBP,TLR7,ZBP1
GO:MF	carbohydrate binding	GO:0030246	FALSE	3.30E-09	8.48164	284	744	20	78724	CD22,CLEC10A,CLEC1A,CLEC4C,CLEC7A,GALNT5,GALNTL6,HLA-DRA,IL2,LGALS9,MGAM2,MRC1,SIGLEC1,SIGLEC6,CHI3L1,EVA1C,GALNT12,KLRD1,KLRF1,NECTIN1
GO:MF	transporter activity	GO:0005215	FALSE	5.14E-09	8.28933	1351	744	43	78724	ABCG2,ANO5,ATP10D,ATP1B1,CACNA1A,CACNA1E,CACNA2D3,CALHM6,CAV1,CLCN1,CLIC2,KCNH7,NDUFV3,OSBPL10,OSBPL1A,PLSCR1,PLSCR4,SCN9A,SLC14A1,SLC16A4,SLC1A3,SLC26A8,SLC38A5,SLC38A9,SLC44A1,SLC45A2,SLC7A7,SLC8A3,SLC9A9,TRPM4,TSPO2,AKT1,AMIGO1,ATP6V0E2,CLIC3,KCNQ5,NDUFB8,PRF1,SCN2A,SLC12A1,SLC25A29,SLC25A32,TSPOAP1
GO:MF	cell adhesion molecule binding	GO:0050839	FALSE	6.20E-09	8.20791	564	744	27	78724	BCAM,CD151,CIP2A,COBLL1,COL4A3,DDX3X,DIAPH3,EIF2S3,FAP,IDH1,ISG15,NEXN,NLGN1,NRG1,PDLIM5,PKN2,PLPP3,PTPRF,PTPRO,SLAMF1,STAT1,SWAP70,BAG3,CDK5R1,NECTIN1,NRCAM,PHLDB2
GO:MF	DNA-binding transcription repressor activity	GO:0001217	FALSE	2.11E-08	7.67628	280	744	19	78724	BCL11A,BHLHE41,E2F8,ETV7,HESX1,HHEX,MXI1,SOX6,TFEC,TRPS1,ZBTB20,ZNF205,ASCL2,NFATC2,NR1D2,NR2F6,TBX21,THAP11,ZBTB45
GO:MF	G protein-coupled receptor binding	GO:0001664	FALSE	4.32E-08	7.36426	292	744	19	78724	C5,CCR2,CCRL2,CXCL10,CXCL9,GNAS,IL2,JAK2,MARCO,PNOC,RTP4,STAT1,WNT10A,WNT16,AKAP5,CCL28,CCL3L3,REEP2,TUB
GO:MF	acyltransferase activity	GO:0016746	FALSE	8.85E-08	7.0531	778	744	30	78724	AANAT,ALAS2,DTX3L,FANCL,GLYATL2,HERC5,HERC6,MARCHF1,MARCHF3,MARCHF8,MIB1,NT5C2,PNPLA4,SAT1,SIAH2,SPTLC2,TRIM22,TRIM38,TRIM5,TRIM58,UBE2L6,DTX3,MED27,MEX3C,MKRN3,NAA60,PAFAH2,SH3RF3,SIAH3,TRIM32
GO:MF	DNA-binding transcription repressor activity, RNA polymerase II-specific	GO:0001227	FALSE	9.16E-08	7.03831	270	744	18	78724	BCL11A,BHLHE41,E2F8,ETV7,HESX1,HHEX,MXI1,TFEC,TRPS1,ZBTB20,ZNF205,ASCL2,NFATC2,NR1D2,NR2F6,TBX21,THAP11,ZBTB45
GO:MF	ubiquitin protein ligase activity	GO:0061630	FALSE	2.15E-07	6.66851	359	744	20	78724	DTX3L,FANCL,HERC5,HERC6,MARCHF1,MARCHF8,MIB1,NT5C2,SIAH2,TRIM22,TRIM38,TRIM5,TRIM58,DTX3,MED27,MEX3C,MKRN3,SH3RF3,SIAH3,TRIM32
GO:MF	transmembrane transporter activity	GO:0022857	FALSE	2.16E-07	6.66528	1235	744	38	78724	ABCG2,ANO5,ATP1B1,CACNA1A,CACNA1E,CACNA2D3,CALHM6,CAV1,CLCN1,CLIC2,KCNH7,NDUFV3,SCN9A,SLC14A1,SLC16A4,SLC1A3,SLC26A8,SLC38A5,SLC38A9,SLC44A1,SLC45A2,SLC7A7,SLC8A3,SLC9A9,TRPM4,TSPO2,AKT1,AMIGO1,ATP6V0E2,CLIC3,KCNQ5,NDUFB8,PRF1,SCN2A,SLC12A1,SLC25A29,SLC25A32,TSPOAP1
GO:MF	small GTPase binding	GO:0031267	FALSE	2.19E-07	6.65908	285	744	18	78724	ARHGAP44,C9ORF72,CAV1,DENND5B,DIAPH3,DMXL2,DOCK4,EVI5,FGD4,PKN2,PLEKHG1,RASGRP3,RIN2,YBX3,CYFIP2,DAPK3,EXPH5,NOXA1
GO:MF	GDP binding	GO:0019003	FALSE	2.50E-07	6.6017	324	744	19	78724	BCAR3,C9ORF72,DENND5B,DNM1,DOCK4,FGD4,GBP1,PLEKHG1,RALGPS2,RASGEF1B,RASGRP3,RIN2,SLC38A9,SWAP70,ARHGEF28,DOCK6,PLEKHG4,RHEBL1,RHOF
GO:MF	DNA-binding transcription factor binding	GO:0140297	FALSE	2.80E-07	6.55361	488	744	23	78724	BCL11A,BHLHE41,DTX3L,HHEX,HSPB1,IFI27,LMO2,OASL,PARP9,RB1,RBBP8,SP100,TXLNG,ASCL2,DAPK3,DGKQ,DLL1,LDB1,MAD2L2,NKX3-1,PRMT2,TRIM32,ZFPM1
GO:MF	transcription coregulator activity	GO:0003712	FALSE	3.14E-07	6.50243	491	744	23	78724	BCL11A,BEND6,CD274,ENSG00000288721,IL31RA,LMO2,NRG1,PARP14,PARP9,PAWR,RB1,RBBP8,SIAH2,TRIM22,TRIM38,TRIM5,LDB1,MED27,PER2,PRMT2,SMAD7,TRIM32,ZFPM1
GO:MF	phospholipid binding	GO:0005543	FALSE	3.14E-07	6.50243	491	744	23	78724	ANXA5,ARHGAP44,BTK,CPNE8,DAPP1,DNM1,GOLPH3L,NME4,OSBPL10,OSBPL1A,RPS6KC1,RUBCNL,SESTD1,SGIP1,SNCA,SNX22,WDFY1,ZCCHC2,AKT1,PAFAH2,SMPD3,TOM1L2,ZFYVE28
GO:MF	peptidase regulator activity	GO:0061134	FALSE	5.42E-07	6.26595	231	744	16	78724	AIM2,ANOS1,BST2,C5,CASP1,CAV1,COL4A3,CTSL,CTSV,NAIP,PSME2,SERPINB2,SERPING1,SERPINI2,NDUFA13,NKX3-1
GO:MF	ubiquitin-like protein ligase activity	GO:0061659	FALSE	5.48E-07	6.26118	379	744	20	78724	DTX3L,FANCL,HERC5,HERC6,MARCHF1,MARCHF8,MIB1,NT5C2,SIAH2,TRIM22,TRIM38,TRIM5,TRIM58,DTX3,MED27,MEX3C,MKRN3,SH3RF3,SIAH3,TRIM32
GO:MF	ubiquitin protein ligase binding	GO:0031625	FALSE	6.82E-07	6.16634	306	744	18	78724	AICDA,CCDC50,CD40,CHEK2,FANCL,ISG15,RB1,SMAD1,SMC6,UBE2L6,USP25,AXIN1,CBS,HSPA1L,PER3,PRR5L,SMAD7,WASHC1
GO:MF	kinase activator activity	GO:0019209	FALSE	6.85E-07	6.16413	142	744	13	78724	DDX3X,IL2,MAP3K20,MOB3B,NCKAP1L,NRG1,RICTOR,STRADB,ACVR2B,CCND3,CDK5R1,DGKQ,PARP16
GO:MF	guanyl-nucleotide exchange factor activity	GO:0005085	FALSE	6.95E-07	6.15775	235	744	16	78724	BCAR3,C9ORF72,DENND5B,DOCK4,FGD4,PLEKHG1,RALGPS2,RASGEF1B,RASGRP3,RIN2,SLC38A9,SWAP70,ARHGEF28,DOCK6,PLEKHG4,RHOF
GO:MF	oxidoreductase activity	GO:0016491	FALSE	9.53E-07	6.02097	759	744	28	78724	ALDH1A1,BLVRA,CLIC2,CYBB,DHRS9,HSD17B4,HSD17B6,IDH1,IL4I1,KDM6A,KMO,MAOB,NDUFV3,SNCA,ACADVL,AKR1C3,AKT1,CBS,CDO1,CLIC3,DHCR24,DHRS11,DHRS3,GFOD1,NDUFB8,NOXA1,PTGES,PYROXD2
GO:MF	GTPase binding	GO:0051020	FALSE	1.1908E-06	5.92416	317	744	18	78724	ARHGAP44,C9ORF72,CAV1,DENND5B,DIAPH3,DMXL2,DOCK4,EVI5,FGD4,PKN2,PLEKHG1,RASGRP3,RIN2,YBX3,CYFIP2,DAPK3,EXPH5,NOXA1
GO:MF	amide binding	GO:0033218	FALSE	1.26911E-06	5.8965	245	744	16	78724	C1QA,CACNA1A,CALCRL,CD1C,FCGR2B,FOLR2,FOLR3,MARCO,MSR1,NLGN1,PRLR,TLR10,ACADVL,APBA2,CD1B,PTGES
GO:MF	ubiquitin-protein transferase activity	GO:0004842	FALSE	1.33715E-06	5.87382	485	744	22	78724	DTX3L,FANCL,HERC5,HERC6,MARCHF1,MARCHF3,MARCHF8,MIB1,NT5C2,SIAH2,TRIM22,TRIM38,TRIM5,TRIM58,UBE2L6,DTX3,MED27,MEX3C,MKRN3,SH3RF3,SIAH3,TRIM32
GO:MF	phosphoric ester hydrolase activity	GO:0042578	FALSE	1.49612E-06	5.82503	488	744	22	78724	CIP2A,DUSP3,EIF2AK2,NT5C2,PDP1,PLPP3,PTPRF,PTPRO,PUDP,SMPDL3A,DUSP2,EPHX2,PDE3B,PDE9A,PFKFB1,PLCH2,PPP1R12C,PPP2R2B,PTP4A3,PTPN7,SMPD3,SYNJ2
GO:MF	immune receptor activity	GO:0140375	FALSE	1.58233E-06	5.8007	152	744	13	78724	C3AR1,CCR2,CCRL2,FCGR2B,FPR3,HLA-DRA,IL31RA,OSMR,PRLR,IL2RB,KIR3DL1,KLRD1,KLRF1
GO:MF	ATP hydrolysis activity	GO:0016887	FALSE	2.18092E-06	5.66136	411	744	20	78724	ABCG2,ATP10D,CHD1,DDX3X,DDX60,DDX60L,DNAH8,HELZ2,IFIH1,NAIP,NAV3,NSF,SHOC1,SMC6,SMCHD1,SMPDL3A,CARNS1,HSPA1L,KIFC2,NTPCR
GO:MF	ubiquitin-like protein transferase activity	GO:0019787	FALSE	3.95946E-06	5.40236	515	744	22	78724	DTX3L,FANCL,HERC5,HERC6,MARCHF1,MARCHF3,MARCHF8,MIB1,NT5C2,SIAH2,TRIM22,TRIM38,TRIM5,TRIM58,UBE2L6,DTX3,MED27,MEX3C,MKRN3,SH3RF3,SIAH3,TRIM32
GO:MF	inorganic molecular entity transmembrane transporter activity	GO:0015318	FALSE	6.02996E-06	5.21969	827	744	28	78724	ANO5,ATP1B1,CACNA1A,CACNA1E,CACNA2D3,CAV1,CLCN1,CLIC2,KCNH7,NDUFV3,SCN9A,SLC14A1,SLC1A3,SLC26A8,SLC38A5,SLC45A2,SLC8A3,SLC9A9,TRPM4,AKT1,AMIGO1,ATP6V0E2,CLIC3,KCNQ5,NDUFB8,SCN2A,SLC12A1,TSPOAP1
GO:MF	molecular function inhibitor activity	GO:0140678	FALSE	6.18301E-06	5.2088	528	744	22	78724	ANOS1,ANXA5,BST2,C5,CAV1,CIP2A,COL4A3,DTX3L,HSPB1,IL1RN,LY6E,NAIP,PARP9,SERPINB2,SERPING1,SERPINI2,SNCA,WARS1,AKT1,NKX3-1,PPP1R12C,SMAD7
GO:MF	glycosyltransferase activity	GO:0016757	FALSE	6.56212E-06	5.18296	275	744	16	78724	C1GALT1,GALNT5,GALNTL6,GCNT1,GCNT2,HEXB,LACC1,PARP12,PARP14,PARP9,UGT8,B4GALT4,GALNT12,MFNG,MGAT4A,PARP16
GO:MF	ATP-dependent activity	GO:0140657	FALSE	6.64281E-06	5.17765	626	744	24	78724	ABCG2,ATP10D,ATP1B1,CHD1,DDX3X,DDX60,DDX60L,DNAH8,HELZ2,IFIH1,NAIP,NAV3,NSF,SHOC1,SMC6,SMCHD1,SMPDL3A,ATP6V0E2,BAG3,CARNS1,HSPA1L,KIFC2,MYO6,NTPCR
GO:MF	aminoacyltransferase activity	GO:0016755	FALSE	7.31184E-06	5.13597	533	744	22	78724	DTX3L,FANCL,HERC5,HERC6,MARCHF1,MARCHF3,MARCHF8,MIB1,NT5C2,SIAH2,TRIM22,TRIM38,TRIM5,TRIM58,UBE2L6,DTX3,MED27,MEX3C,MKRN3,SH3RF3,SIAH3,TRIM32
GO:MF	RNA binding	GO:0003723	FALSE	8.27973E-06	5.08198	3091	744	63	78724	ACO1,ADAR,AICDA,APOBEC3A,BST2,CASP7,DDX3X,DDX60,DDX60L,DNM1,EIF2AK2,EIF2S3,EIF2S3B,FECH,H4C1,HELZ2,HERC5,HNRNPH3,HSPB1,IFI16,IFIH1,IFIT1,IFIT2,IFIT5,MAP3K20,MBNL3,MRPL12,NDUFV3,NSUN3,OAS1,OAS2,OAS3,OASL,PARP12,PKN2,PNPT1,PUS10,SAMD4A,SMAD1,SPATS2L,STRBP,TDRD7,TENT5A,TENT5C,TLR7,XRN1,YBX3,ZBP1,ZNF638,ZRSR2,APOBEC3H,ARHGEF28,HNRNPUL2,IMP4,MANF,MEX3C,MKRN3,MRPL4,MYEF2,NTPCR,SARNP,SYNJ2,TRIM32
GO:MF	microtubule binding	GO:0008017	FALSE	8.88336E-06	5.05142	281	744	16	78724	CCDC181,DIAPH3,DNAI7,DNM1,EML6,GAS2L3,MAP2,MX1,MX2,NAV3,SGIP1,STRBP,EML5,FMN1,KIFC2,REEP2
GO:MF	peptide binding	GO:0042277	FALSE	1.53489E-05	4.81392	254	744	15	78724	C1QA,CACNA1A,FCGR2B,HLA-DMA,HLA-DMB,HLA-DRA,MARCO,MSR1,NLGN1,APBA2,DHCR24,GNRHR,MRGPRX2,NMUR1,PTGDR2
GO:MF	monoatomic ion transmembrane transporter activity	GO:0015075	FALSE	1.66491E-05	4.77861	868	744	28	78724	ANO5,ATP1B1,CACNA1A,CACNA1E,CACNA2D3,CALHM6,CAV1,CLCN1,CLIC2,KCNH7,NDUFV3,SCN9A,SLC1A3,SLC26A8,SLC38A5,SLC45A2,SLC8A3,SLC9A9,TRPM4,AKT1,AMIGO1,ATP6V0E2,CLIC3,KCNQ5,NDUFB8,SCN2A,SLC12A1,TSPOAP1
GO:MF	nucleotidyltransferase activity	GO:0016779	FALSE	2.10458E-05	4.67684	156	744	12	78724	OAS1,OAS2,OAS3,OASL,PARP12,PARP14,PARP9,PNPT1,POLK,TENT5A,TENT5C,PARP16
GO:MF	calcium ion binding	GO:0005509	FALSE	2.87175E-05	4.54185	729	744	25	78724	ANXA5,CACNA1E,CALB1,FSTL1,GCH1,PLSCR1,PLSCR4,RASGRP3,S100A10,SNCA,SPTA1,SWAP70,TRPM4,CAPN12,CAPN8,CD320,CDK5R1,DLL1,EEF2K,FAT4,NELL2,NINL,PLCH2,PRF1,S100B
GO:MF	RNA polymerase II-specific DNA-binding transcription factor binding	GO:0061629	FALSE	2.99206E-05	4.52403	348	744	17	78724	BHLHE41,DTX3L,HSPB1,IFI27,LMO2,OASL,PARP9,RB1,RBBP8,SP100,DLL1,LDB1,MAD2L2,NKX3-1,PRMT2,TRIM32,ZFPM1
GO:MF	peptidase activator activity	GO:0016504	FALSE	3.24385E-05	4.48894	56	744	8	78724	AIM2,CASP1,CAV1,CTSL,CTSV,PSME2,NDUFA13,NKX3-1
GO:MF	protein kinase activator activity	GO:0030295	FALSE	3.98369E-05	4.39971	134	744	11	78724	DDX3X,MAP3K20,MOB3B,NCKAP1L,NRG1,RICTOR,STRADB,CCND3,CDK5R1,DGKQ,PARP16
GO:MF	GTPase activator activity	GO:0005096	FALSE	4.35306E-05	4.3612	275	744	15	78724	ALDH1A1,ARHGAP24,ARHGAP44,C9ORF72,DEPDC1B,DOCK4,EVI5,NCKAP1L,RASAL2,RASGRP3,RGPD2,RIN2,STARD13,LLGL2,RGS9
GO:MF	enzyme inhibitor activity	GO:0004857	FALSE	4.70498E-05	4.32744	403	744	18	78724	ANOS1,ANXA5,BST2,C5,CAV1,CIP2A,COL4A3,DTX3L,HSPB1,NAIP,PARP9,SERPINB2,SERPING1,SERPINI2,SNCA,WARS1,AKT1,PPP1R12C
GO:MF	phosphatase activity	GO:0016791	FALSE	0.000140013	3.85383	388	744	17	78724	CIP2A,DUSP3,EIF2AK2,NT5C2,PDP1,PLPP3,PTPRF,PTPRO,PUDP,DUSP2,EPHX2,PFKFB1,PPP1R12C,PPP2R2B,PTP4A3,PTPN7,SYNJ2
GO:MF	cysteine-type endopeptidase activity	GO:0004197	FALSE	0.000184472	3.73407	124	744	10	78724	AIM2,CASP1,CASP7,CTSL,CTSV,NAIP,CAPN12,CAPN5,CAPN8,CTSW
GO:MF	protein serine kinase activity	GO:0106310	FALSE	0.000259633	3.58564	360	744	16	78724	CDK14,CHEK2,EIF2AK1,EIF2AK2,MAP2K6,MAP3K20,PKN2,RIOK3,RPS6KC1,VRK2,AKT1,CAMKK1,DAPK3,MAPK9,PLK3,SBK1
GO:MF	hydrolase activity, acting on carbon-nitrogen (but not peptide) bonds	GO:0016810	FALSE	0.000286281	3.54321	130	744	10	78724	ADAR,AICDA,APOBEC3A,DDAH1,GCH1,LACC1,OPLAH,ZBP1,APOBEC3H,HINT2
GO:MF	MHC protein complex binding	GO:0023023	FALSE	0.000345769	3.46121	33	744	6	78724	ATP1B1,HLA-DMA,HLA-DMB,HLA-DRA,MS4A1,KLRD1
GO:MF	chemokine receptor binding	GO:0042379	FALSE	0.000364742	3.43801	76	744	8	78724	C5,CCR2,CCRL2,CXCL10,CXCL9,STAT1,CCL28,CCL3L3
GO:MF	deaminase activity	GO:0019239	FALSE	0.000416503	3.38038	34	744	6	78724	ADAR,AICDA,APOBEC3A,LACC1,ZBP1,APOBEC3H
GO:MF	pattern recognition receptor activity	GO:0038187	FALSE	0.000416503	3.38038	34	744	6	78724	AIM2,CLEC7A,IFIH1,MARCO,TLR7,TRIM5
GO:MF	2'-5'-oligoadenylate synthetase activity	GO:0001730	FALSE	0.000467077	3.33061	3	744	3	78724	OAS1,OAS2,OAS3
GO:MF	hydrolase activity, acting on carbon-nitrogen (but not peptide) bonds, in cyclic amidines	GO:0016814	FALSE	0.000498655	3.3022	35	744	6	78724	ADAR,AICDA,APOBEC3A,GCH1,LACC1,APOBEC3H
GO:MF	17-beta-hydroxysteroid dehydrogenase (NAD+) activity	GO:0044594	TRUE	0.000533463	3.2729	9	744	4	78724	DHRS9,HSD17B4,HSD17B6,AKR1C3
GO:MF	monoatomic cation transmembrane transporter activity	GO:0008324	FALSE	0.000540339	3.26733	741	744	23	78724	ATP1B1,CACNA1A,CACNA1E,CACNA2D3,CALHM6,CAV1,KCNH7,NDUFV3,SCN9A,SLC1A3,SLC38A5,SLC45A2,SLC8A3,SLC9A9,TRPM4,AKT1,AMIGO1,ATP6V0E2,KCNQ5,NDUFB8,SCN2A,SLC12A1,TSPOAP1
GO:MF	inorganic cation transmembrane transporter activity	GO:0022890	FALSE	0.00079158	3.10151	702	744	22	78724	ATP1B1,CACNA1A,CACNA1E,CACNA2D3,CAV1,KCNH7,NDUFV3,SCN9A,SLC1A3,SLC38A5,SLC45A2,SLC8A3,SLC9A9,TRPM4,AKT1,AMIGO1,ATP6V0E2,KCNQ5,NDUFB8,SCN2A,SLC12A1,TSPOAP1
GO:MF	actin binding	GO:0003779	FALSE	0.000838578	3.07646	442	744	17	78724	COBLL1,DIAPH3,EPB41L3,FGD4,GAS2L3,GBP1,NEXN,PAWR,PDLIM5,SNCA,SPTA1,TMOD2,CDK5R1,FMN1,MYO6,TMSB15B,WASHC1
GO:MF	single-stranded RNA binding	GO:0003727	FALSE	0.000864005	3.06348	85	744	8	78724	DDX3X,DDX60,DDX60L,IFIH1,IFIT5,PNPT1,STRBP,TLR7
GO:MF	UDP-glycosyltransferase activity	GO:0008194	FALSE	0.000883965	3.05356	147	744	10	78724	GALNT5,GALNTL6,GCNT1,GCNT2,HEXB,UGT8,B4GALT4,GALNT12,MFNG,MGAT4A
GO:MF	vitamin binding	GO:0019842	FALSE	0.0010616	2.97404	150	744	10	78724	ALAS2,CALB1,FOLR2,FOLR3,SDSL,SPTLC2,TCN2,CBS,CD320,MMAB
GO:MF	endopeptidase regulator activity	GO:0061135	FALSE	0.00106397	2.97307	186	744	11	78724	AIM2,ANOS1,BST2,C5,COL4A3,NAIP,PSME2,SERPINB2,SERPING1,SERPINI2,NDUFA13
GO:MF	coreceptor activity	GO:0015026	FALSE	0.00113963	2.94324	62	744	7	78724	CD86,FCRL1,FCRL5,GPC4,ERBB2,IL2RB,NECTIN1
GO:MF	channel activity	GO:0015267	FALSE	0.00120207	2.92007	610	744	20	78724	ANO5,CACNA1A,CACNA1E,CACNA2D3,CALHM6,CAV1,CLCN1,CLIC2,KCNH7,SCN9A,SLC14A1,SLC26A8,TRPM4,AKT1,AMIGO1,CLIC3,KCNQ5,PRF1,SCN2A,TSPOAP1
GO:MF	passive transmembrane transporter activity	GO:0022803	FALSE	0.00120207	2.92007	610	744	20	78724	ANO5,CACNA1A,CACNA1E,CACNA2D3,CALHM6,CAV1,CLCN1,CLIC2,KCNH7,SCN9A,SLC14A1,SLC26A8,TRPM4,AKT1,AMIGO1,CLIC3,KCNQ5,PRF1,SCN2A,TSPOAP1
GO:MF	cysteine-type endopeptidase regulator activity involved in apoptotic process	GO:0043028	FALSE	0.00131639	2.88061	41	744	6	78724	CASP1,CTSL,CTSV,NAIP,SNCA,NKX3-1
GO:MF	SH3 domain binding	GO:0017124	FALSE	0.00140372	2.85272	121	744	9	78724	DOCK4,PLSCR1,PLSCR4,SGIP1,AKAP5,FMN1,NOXA1,SKAP1,SYNJ2
GO:MF	signaling adaptor activity	GO:0035591	FALSE	0.00140372	2.85272	121	744	9	78724	AIM2,BANK1,BLNK,DDX3X,FCRL2,GNB4,AXIN1,DAB1,TRADD
GO:MF	sulfur compound binding	GO:1901681	FALSE	0.00143542	2.84302	273	744	13	78724	ANOS1,CXCL10,FSTL1,PTPRF,ACADVL,CBS,COL13A1,EVA1C,GAL3ST4,IMPG1,LGR6,NELL2,PTGES
GO:MF	MHC class II protein complex binding	GO:0023026	FALSE	0.0015136	2.81999	24	744	5	78724	ATP1B1,HLA-DMA,HLA-DMB,HLA-DRA,MS4A1
GO:MF	cysteine-type peptidase activity	GO:0008234	FALSE	0.0015537	2.80863	233	744	12	78724	AIM2,CASP1,CASP7,CTSL,CTSV,NAIP,USP18,USP25,CAPN12,CAPN5,CAPN8,CTSW
GO:MF	phosphatidylinositol binding	GO:0035091	FALSE	0.00189263	2.72293	280	744	13	78724	BTK,DAPP1,DNM1,GOLPH3L,RPS6KC1,RUBCNL,SESTD1,SNX22,WDFY1,ZCCHC2,AKT1,TOM1L2,ZFYVE28
GO:MF	nucleobase-containing compound kinase activity	GO:0019205	FALSE	0.00201752	2.69518	44	744	6	78724	CMPK2,NME4,NT5C2,AK5,LRGUK,NME3
GO:MF	growth factor activity	GO:0008083	FALSE	0.00211995	2.67367	162	744	10	78724	HGF,IL2,IL7,INHBB,MACC1,NRG1,CD320,GDF9,MANF,PDGFD
GO:MF	hexosyltransferase activity	GO:0016758	FALSE	0.00214461	2.66865	200	744	11	78724	C1GALT1,GALNT5,GALNTL6,GCNT1,GCNT2,HEXB,UGT8,B4GALT4,GALNT12,MFNG,MGAT4A
GO:MF	cadherin binding	GO:0045296	FALSE	0.00271088	2.56689	335	744	14	78724	CIP2A,COBLL1,DDX3X,DIAPH3,EIF2S3,IDH1,PDLIM5,PKN2,PTPRO,STAT1,SWAP70,BAG3,CDK5R1,PHLDB2
GO:MF	metal ion transmembrane transporter activity	GO:0046873	FALSE	0.00305599	2.51485	540	744	18	78724	ATP1B1,CACNA1A,CACNA1E,CACNA2D3,CAV1,KCNH7,SCN9A,SLC1A3,SLC38A5,SLC8A3,SLC9A9,TRPM4,AKT1,AMIGO1,KCNQ5,SCN2A,SLC12A1,TSPOAP1
GO:MF	calmodulin binding	GO:0005516	FALSE	0.00311896	2.50599	208	744	11	78724	MAP2,PHKB,SLC8A3,SMTNL1,TRPM4,AKAP5,AKT1,CAMKK1,EEF2K,MYO6,SCN2A
GO:MF	monoatomic ion channel activity	GO:0005216	FALSE	0.00363942	2.43897	547	744	18	78724	ANO5,CACNA1A,CACNA1E,CACNA2D3,CALHM6,CAV1,CLCN1,CLIC2,KCNH7,SCN9A,SLC26A8,TRPM4,AKT1,AMIGO1,CLIC3,KCNQ5,SCN2A,TSPOAP1
GO:MF	serine-type peptidase activity	GO:0008236	FALSE	0.00384574	2.41502	299	744	13	78724	ANOS1,CPVL,CTSV,FAP,HGF,SERPINB2,SERPING1,SERPINI2,GZMB,GZMM,PRSS23,PRSS33,ST14
GO:MF	antigen binding	GO:0003823	FALSE	0.0039941	2.39858	174	744	10	78724	CD1C,CD40,HLA-DMA,HLA-DMB,HLA-DRA,SLAMF1,CD1B,DHCR24,KLRD1,SPON2
GO:MF	serine hydrolase activity	GO:0017171	FALSE	0.00443279	2.35332	303	744	13	78724	ANOS1,CPVL,CTSV,FAP,HGF,SERPINB2,SERPING1,SERPINI2,GZMB,GZMM,PRSS23,PRSS33,ST14
GO:MF	steroid binding	GO:0005496	FALSE	0.00522511	2.2819	108	744	8	78724	CALB1,CAV1,OSBPL10,OSBPL1A,SLC38A9,TSPO2,ESRRA,SULT1E1
GO:MF	adenylyltransferase activity	GO:0070566	FALSE	0.00572851	2.24196	31	744	5	78724	OAS1,OAS2,OAS3,TENT5A,TENT5C
GO:MF	virus receptor activity	GO:0001618	FALSE	0.00584709	2.23306	79	744	7	78724	CD86,GYPA,MRC1,PLSCR1,SLAMF1,NCAM1,NECTIN1
GO:MF	exogenous protein binding	GO:0140272	FALSE	0.00635575	2.19683	80	744	7	78724	CD86,GYPA,MRC1,PLSCR1,SLAMF1,NCAM1,NECTIN1
GO:MF	carboxylic acid transmembrane transporter activity	GO:0046943	FALSE	0.00651455	2.18612	184	744	10	78724	ABCG2,SLC16A4,SLC1A3,SLC26A8,SLC38A5,SLC38A9,SLC7A7,TSPO2,SLC25A29,SLC25A32
GO:MF	lyase activity	GO:0016829	FALSE	0.00654231	2.18427	225	744	11	78724	ACO1,ADCY6,CA1,FECH,GNAS,HSD17B4,RSAD2,SDSL,CA11,CA6,CBS
GO:MF	tumor necrosis factor receptor binding	GO:0005164	TRUE	0.00673654	2.17156	32	744	5	78724	STAT1,TNFSF10,TNFSF13B,TNFSF15,TRADD
GO:MF	organic acid transmembrane transporter activity	GO:0005342	FALSE	0.00682913	2.16563	185	744	10	78724	ABCG2,SLC16A4,SLC1A3,SLC26A8,SLC38A5,SLC38A9,SLC7A7,TSPO2,SLC25A29,SLC25A32
GO:MF	amyloid-beta binding	GO:0001540	FALSE	0.00748333	2.12591	82	744	7	78724	C1QA,CACNA1A,FCGR2B,MARCO,MSR1,NLGN1,APBA2
GO:MF	steroid dehydrogenase activity, acting on the CH-OH group of donors, NAD or NADP as acceptor	GO:0033764	FALSE	0.00787774	2.1036	33	744	5	78724	DHRS9,HSD17B4,HSD17B6,AKR1C3,DHRS11
GO:MF	cytokine binding	GO:0019955	FALSE	0.00808972	2.09207	150	744	9	78724	CASP1,CCR2,CCRL2,GBP1,IL1RN,IL31RA,OSMR,PRLR,IL2RB
GO:MF	DNA-binding transcription activator activity, RNA polymerase II-specific	GO:0001228	FALSE	0.00973954	2.01146	479	744	16	78724	HHEX,NFIB,PAX5,PLSCR1,SMAD1,TCF4,TFEC,ZFX,ASCL2,MAFF,NFATC2,TBX21,THAP11,ZNF208,ZNF212,ZNF76
GO:MF	tetrapyrrole binding	GO:0046906	FALSE	0.00997985	2.00088	154	744	9	78724	CYBB,EIF2AK1,FECH,JAK2,KCNH7,TCN2,CBS,CD320,MMAB
GO:BP	biological_process	GO:0008150	TRUE	5e-324	323.306	21026	744	696	78724	AANAT,ABCG2,ACO1,ACOT9,ADAM28,ADAR,ADCY6,AFF1,AICDA,AIM2,ALAS2,ALDH1A1,ANO5,ANOS1,ANXA5,AP1S2,AP1S3,APOBEC3A,APOL6,ARHGAP24,ARHGAP44,ARL4A,ATP10D,ATP1B1,AUNIP,BAHCC1,BANK1,BAZ2B,BCAM,BCAR3,BCL11A,BCL2L1,BEND6,BHLHE41,BLNK,BLVRA,BST2,BTK,BTLA,C1GALT1,C1QA,C1QB,C1QC,C3AR1,C5,C9ORF72,CA1,CACNA1A,CACNA1E,CACNA2D3,CALB1,CALCRL,CALHM6,CASP1,CASP7,CAV1,CC2D2A,CCDC39,CCDC50,CCDC68,CCNA1,CCR2,CCRL2,CD151,…
GO:BP	cellular process	GO:0009987	FALSE	1.01E-300	299.997	20247	744	669	78724	AANAT,ABCG2,ACO1,ACOT9,ADAM28,ADAR,ADCY6,AFF1,AICDA,AIM2,ALAS2,ALDH1A1,ANO5,ANOS1,ANXA5,AP1S2,AP1S3,APOBEC3A,APOL6,ARHGAP24,ARHGAP44,ARL4A,ATP10D,ATP1B1,AUNIP,BAHCC1,BANK1,BAZ2B,BCAM,BCAR3,BCL11A,BCL2L1,BEND6,BHLHE41,BLNK,BLVRA,BST2,BTK,BTLA,C1GALT1,C1QA,C1QB,C1QC,C3AR1,C5,C9ORF72,CA1,CACNA1A,CACNA1E,CACNA2D3,CALB1,CALCRL,CALHM6,CASP1,CASP7,CAV1,CC2D2A,CCDC39,CCDC68,CCNA1,CCR2,CCRL2,CD151,CD180,C…
GO:BP	biological regulation	GO:0065007	FALSE	3.21E-223	222.493	12743	744	511	78724	AANAT,ACO1,ADAR,ADCY6,AFF1,AICDA,AIM2,ALDH1A1,ANXA5,APOBEC3A,ARHGAP24,ARHGAP44,ATP10D,ATP1B1,AUNIP,BANK1,BAZ2B,BCAM,BCAR3,BCL11A,BCL2L1,BEND6,BHLHE41,BLNK,BST2,BTK,BTLA,C1QA,C1QC,C3AR1,C5,C9ORF72,CACNA1A,CACNA1E,CACNA2D3,CALB1,CALCRL,CALHM6,CASP1,CASP7,CAV1,CC2D2A,CCDC39,CCDC68,CCR2,CCRL2,CD151,CD180,CD19,CD1C,CD22,CD274,CD40,CD86,CDK14,CHEK2,CLCN1,CLEC1A,CLEC7A,CLIC2,COL4A3,CREB5,CRYBA1,CTSL,CTS…
GO:BP	regulation of biological process	GO:0050789	FALSE	1.09E-207	206.964	12336	744	490	78724	ACO1,ADAR,ADCY6,AFF1,AICDA,AIM2,ALDH1A1,ANXA5,APOBEC3A,ARHGAP24,ARHGAP44,ATP1B1,AUNIP,BANK1,BAZ2B,BCAM,BCAR3,BCL11A,BCL2L1,BEND6,BHLHE41,BLNK,BST2,BTK,BTLA,C1QA,C1QC,C3AR1,C5,C9ORF72,CACNA1A,CACNA1E,CACNA2D3,CALB1,CALCRL,CALHM6,CASP1,CASP7,CAV1,CC2D2A,CCDC39,CCDC68,CCR2,CCRL2,CD151,CD180,CD19,CD1C,CD22,CD274,CD40,CD86,CDK14,CHEK2,CLEC1A,CLEC7A,CLIC2,COL4A3,CREB5,CRYBA1,CTSL,CTSV,CXCL10,CXCL9,CYBB…
GO:BP	response to stimulus	GO:0050896	FALSE	1.18E-199	198.929	8999	744	426	78724	AANAT,ABCG2,ACO1,ADAR,ADCY6,AICDA,AIM2,ALAS2,ALDH1A1,ANO5,ANOS1,ANXA5,APOBEC3A,ARHGAP24,ARHGAP44,ATP1B1,AUNIP,BANK1,BCAM,BCAR3,BCL11A,BCL2L1,BEND6,BLNK,BST2,BTK,BTLA,C1QA,C1QC,C3AR1,C5,C9ORF72,CACNA1A,CALB1,CALCRL,CALHM6,CASP1,CASP7,CAV1,CC2D2A,CCDC68,CCR2,CCRL2,CD151,CD180,CD19,CD1C,CD22,CD274,CD40,CD86,CDK14,CHEK2,CIP2A,CLEC10A,CLEC1A,CLEC4C,CLEC7A,CLIC2,CMPK2,COL4A3,CPNE8,CRYBA1,CSMD1,CTSL,CTS…
GO:BP	regulation of cellular process	GO:0050794	FALSE	1.47E-194	193.833	11946	744	471	78724	ACO1,ADAR,ADCY6,AFF1,AICDA,AIM2,ALDH1A1,ANXA5,APOBEC3A,ARHGAP24,ARHGAP44,ATP1B1,AUNIP,BANK1,BAZ2B,BCAM,BCAR3,BCL11A,BCL2L1,BEND6,BHLHE41,BLNK,BST2,BTK,BTLA,C1QC,C3AR1,C5,C9ORF72,CACNA1A,CACNA2D3,CALB1,CALCRL,CALHM6,CASP1,CASP7,CAV1,CC2D2A,CCDC39,CCDC68,CCR2,CCRL2,CD151,CD180,CD19,CD1C,CD22,CD274,CD40,CD86,CDK14,CHEK2,CLEC1A,CLEC7A,CLIC2,COL4A3,CREB5,CRYBA1,CTSL,CTSV,CXCL10,CXCL9,CYBB,DAPP1,DCAF12…
GO:BP	multicellular organismal process	GO:0032501	FALSE	8.06E-158	157.094	7322	744	352	78724	ABCG2,ACO1,ADAR,ADCY6,AICDA,AIM2,ALAS2,ALDH1A1,ANOS1,ANXA5,ARHGAP24,ARHGAP44,ATP1B1,BAHCC1,BANK1,BCAR3,BCL11A,BCL2L1,BEND6,BHLHE41,BLNK,BST2,BTK,C1GALT1,C1QA,C1QC,C3AR1,C5,C9ORF72,CALB1,CALCRL,CALHM6,CASP1,CASP7,CAV1,CC2D2A,CCDC39,CCDC50,CCR2,CD151,CD180,CD19,CD1C,CD22,CD274,CD40,CD86,CFAP54,CLCN1,CLEC7A,CLIC2,COL19A1,COL4A3,CRYBA1,CSMD1,CTSL,CXCL10,CYBB,DCAF12,DDAH1,DDX3X,DIAPH3,DNAJC13,DOCK4,DR…
GO:BP	cellular response to stimulus	GO:0051716	FALSE	2.84E-148	147.547	7376	744	343	78724	AANAT,ABCG2,ADAR,ADCY6,AICDA,AIM2,ALDH1A1,ANXA5,ARHGAP24,ARHGAP44,ATP1B1,AUNIP,BANK1,BCAM,BCAR3,BCL11A,BCL2L1,BEND6,BLNK,BST2,BTK,BTLA,C3AR1,C5,C9ORF72,CACNA1A,CALCRL,CASP1,CASP7,CAV1,CC2D2A,CCDC68,CCR2,CCRL2,CD180,CD19,CD22,CD274,CD40,CD86,CDK14,CHEK2,CIP2A,CLEC1A,CLEC7A,CLIC2,CMPK2,COL4A3,CPNE8,CRYBA1,CTSL,CTSV,CXCL10,CXCL9,CYBB,DAPP1,DDAH1,DDIAS,DDX3X,DDX60,DEPDC1B,DIAPH3,DOCK4,DTX3L,DUSP3,EIF…
GO:BP	cell communication	GO:0007154	FALSE	3.10E-144	143.508	6540	744	322	78724	ADAR,ADCY6,AIM2,ANXA5,ARHGAP24,ARHGAP44,ATP1B1,BANK1,BCAM,BCAR3,BCL2L1,BEND6,BLNK,BST2,BTK,BTLA,C1QA,C3AR1,C5,C9ORF72,CACNA1A,CACNA1E,CALB1,CALCRL,CASP1,CAV1,CC2D2A,CCDC68,CCR2,CCRL2,CD180,CD19,CD22,CD274,CD40,CD86,CDK14,CHEK2,CLCN1,CLEC1A,CLEC7A,CLIC2,COL4A3,CRYBA1,CTSL,CTSV,CXCL10,CXCL9,CYBB,DAPP1,DDAH1,DDIAS,DDX3X,DDX60,DEPDC1B,DIAPH3,DNM1,DOCK4,DTX3L,DUSP3,EIF2AK1,EIF2AK2,ENTPD2,EXOC3L1,FCGR2…
GO:BP	signaling	GO:0023052	FALSE	7.86E-143	142.105	6515	744	320	78724	ADAR,ADCY6,AIM2,ANXA5,ARHGAP24,ARHGAP44,ATP1B1,BANK1,BCAM,BCAR3,BCL2L1,BEND6,BLNK,BST2,BTK,BTLA,C1QA,C3AR1,C5,C9ORF72,CACNA1A,CACNA1E,CALB1,CALCRL,CASP1,CAV1,CC2D2A,CCDC68,CCR2,CCRL2,CD180,CD19,CD22,CD274,CD40,CD86,CDK14,CHEK2,CLEC1A,CLEC7A,CLIC2,COL4A3,CRYBA1,CTSL,CTSV,CXCL10,CXCL9,CYBB,DAPP1,DDAH1,DDIAS,DDX3X,DDX60,DEPDC1B,DIAPH3,DNM1,DOCK4,DTX3L,DUSP3,EIF2AK1,EIF2AK2,ENTPD2,EXOC3L1,FCGR2B,FCRL…
GO:BP	signal transduction	GO:0007165	FALSE	6.16E-136	135.211	6002	744	302	78724	ADAR,ADCY6,AIM2,ANXA5,ARHGAP24,ARHGAP44,ATP1B1,BANK1,BCAM,BCAR3,BCL2L1,BEND6,BLNK,BST2,BTK,BTLA,C3AR1,C5,C9ORF72,CALCRL,CASP1,CAV1,CC2D2A,CCDC68,CCR2,CCRL2,CD180,CD19,CD22,CD274,CD40,CD86,CDK14,CHEK2,CLEC1A,CLEC7A,CLIC2,COL4A3,CRYBA1,CTSL,CTSV,CXCL10,CXCL9,CYBB,DAPP1,DDAH1,DDIAS,DDX3X,DDX60,DEPDC1B,DIAPH3,DOCK4,DTX3L,DUSP3,EIF2AK1,EIF2AK2,ENTPD2,FCGR2B,FCRL2,FCRL5,FCRLA,FFAR2,FGD4,FPR3,FSTL1,GBP1…
GO:BP	developmental process	GO:0032502	FALSE	3.80E-121	120.421	6553	744	297	78724	ACO1,ADAM28,ADAR,ADCY6,AICDA,AIM2,ALAS2,ANOS1,ARHGAP24,ARHGAP44,ARL4A,BAHCC1,BCAR3,BCL11A,BCL2L1,BEND6,BHLHE41,BLNK,BTK,C1GALT1,C1QA,C1QB,C1QC,C3AR1,C9ORF72,CALB1,CALCRL,CASP7,CAV1,CC2D2A,CCDC39,CCNA1,CCR2,CD151,CD19,CD40,CD86,CFAP54,CLEC7A,COL19A1,COL4A3,CRYBA1,CSMD1,CTSL,CXCL10,CXCL9,CYBB,DDAH1,DDX3X,DHRS9,DIAPH3,DNAJC13,DOCK4,DRAM2,E2F8,EAF2,EIF2AK1,EIF2AK2,EMP1,EPB41L3,ETV7,FAM151B,FAM210B,FA…
GO:BP	positive regulation of biological process	GO:0048518	FALSE	6.04E-121	120.219	6264	744	291	78724	ADAR,AICDA,AIM2,APOBEC3A,ATP1B1,BANK1,BCAR3,BCL11A,BCL2L1,BEND6,BLNK,BST2,BTK,C1QA,C1QC,C3AR1,C5,C9ORF72,CALB1,CALCRL,CASP1,CASP7,CAV1,CCR2,CD151,CD180,CD19,CD1C,CD22,CD274,CD40,CD86,CHEK2,CLEC7A,CLIC2,CREB5,CRYBA1,CTSL,CTSV,CXCL10,CXCL9,CYBB,DDAH1,DDX3X,DDX60,DENND5B,DEPDC1B,DOCK4,DTX3L,DUSP3,E2F8,EAF2,EIF2AK1,EIF2AK2,FAM210B,FAP,FCGR2B,FFAR2,FOLR2,FPR3,GBP1,GBP3,GCH1,GCNT1,GCNT2,GNAS,GOLPH3L,HE…
GO:BP	metabolic process	GO:0008152	FALSE	3.58E-117	116.447	14136	744	416	78724	AANAT,ABCG2,ACO1,ACOT9,ADAM28,ADAR,ADCY6,AFF1,AICDA,AIM2,ALAS2,ALDH1A1,APOBEC3A,APOL6,ATP1B1,AUNIP,BANK1,BAZ2B,BCAR3,BCL11A,BCL2L1,BEND6,BHLHE41,BLNK,BLVRA,BST2,BTK,C1GALT1,C3AR1,C5,C9ORF72,CA1,CALHM6,CASP1,CASP7,CAV1,CCR2,CD22,CD274,CD40,CD86,CDK14,CHEK2,CLEC7A,CMPK2,CPVL,CREB5,CRYBA1,CTSE,CTSL,CTSV,CXCL10,CYBB,DAPP1,DCAF12,DDAH1,DDX3X,DHRS9,DIAPH3,DRAM2,DSE,DTX3L,DUSP3,E2F8,EAF2,EIF2AK1,EIF2AK2…
GO:BP	anatomical structure development	GO:0048856	FALSE	7.04E-117	116.153	5997	744	281	78724	ACO1,ADAR,ADCY6,AICDA,AIM2,ALAS2,ANOS1,ARHGAP24,ARHGAP44,BAHCC1,BCAR3,BCL11A,BCL2L1,BEND6,BHLHE41,BLNK,BTK,C1GALT1,C1QA,C1QB,C1QC,C3AR1,C9ORF72,CALB1,CALCRL,CASP7,CAV1,CC2D2A,CCDC39,CCR2,CD151,CD19,CD40,CD86,CFAP54,CLEC7A,COL19A1,COL4A3,CRYBA1,CSMD1,CTSL,CXCL10,CXCL9,CYBB,DDAH1,DHRS9,DIAPH3,DOCK4,DRAM2,E2F8,EAF2,EIF2AK1,EIF2AK2,EMP1,EPB41L3,ETV7,FAM151B,FAM210B,FAP,FCGR2B,FECH,FGD4,FSTL1,GCNT1,GC…
GO:BP	positive regulation of cellular process	GO:0048522	FALSE	4.22E-112	111.375	5920	744	274	78724	ADAR,AICDA,AIM2,APOBEC3A,ATP1B1,BANK1,BCAR3,BCL11A,BCL2L1,BEND6,BLNK,BST2,BTK,C3AR1,C5,C9ORF72,CALB1,CALCRL,CASP1,CASP7,CAV1,CCR2,CD151,CD180,CD19,CD1C,CD274,CD40,CD86,CHEK2,CLEC7A,CLIC2,CREB5,CRYBA1,CTSL,CTSV,CXCL10,CXCL9,CYBB,DDAH1,DDX3X,DDX60,DEPDC1B,DOCK4,DTX3L,DUSP3,E2F8,EAF2,EIF2AK1,EIF2AK2,FAM210B,FAP,FCGR2B,FFAR2,FOLR2,GCH1,GCNT1,GCNT2,GNAS,GOLPH3L,HELZ2,HEXB,HGF,HHEX,HLA-DMA,HLA-DMB,HLA-…
GO:BP	immune system process	GO:0002376	FALSE	1.26E-109	108.9	2871	744	200	78724	ADAR,AICDA,AIM2,ALAS2,APOBEC3A,ATP1B1,BANK1,BLNK,BST2,BTK,BTLA,C1QA,C1QC,C3AR1,C5,C9ORF72,CALHM6,CASP1,CAV1,CCR2,CCRL2,CD151,CD180,CD19,CD1C,CD22,CD274,CD40,CD86,CLEC10A,CLEC4C,CLEC7A,CTSE,CTSL,CTSV,CXCL10,CXCL9,CYBB,DCAF12,DDX3X,DDX60,DIAPH3,DTX3L,DUSP3,EIF2AK2,FAM210B,FCGR2B,FCRL1,FCRL2,FCRL5,FCRLA,FECH,FFAR2,FPR3,GBP1,GBP3,GCH1,GCNT1,GNAS,H4C1,HERC5,HHEX,HLA-DMA,HLA-DMB,HLA-DRA,IFI16,IFI27,IFI…
GO:BP	response to stress	GO:0006950	FALSE	5.37E-107	106.27	3948	744	225	78724	ADAR,AICDA,AIM2,ALAS2,ANO5,ANXA5,APOBEC3A,ARHGAP24,ATP1B1,AUNIP,BCL2L1,BLNK,BST2,BTK,C1QA,C1QC,C3AR1,C5,CALHM6,CASP1,CASP7,CAV1,CCR2,CCRL2,CD151,CD180,CD274,CD40,CHEK2,CIP2A,CLEC10A,CLEC4C,CLEC7A,CXCL10,CXCL9,CYBB,DDAH1,DDIAS,DDX3X,DDX60,DDX60L,DTX3L,EIF2AK1,EIF2AK2,ENTPD2,FAM8A1,FANCL,FAP,FCGR2B,FECH,FFAR2,FOLR2,FPR3,GBP1,GBP3,GCH1,GNAS,HERC5,HGF,HPS5,HSPB1,IDH1,IFI16,IFI27,IFI35,IFI44L,IFI6,IFI…
GO:BP	immune response	GO:0006955	FALSE	4.40E-104	103.357	2070	744	171	78724	ADAR,AICDA,AIM2,APOBEC3A,ATP1B1,BANK1,BLNK,BST2,BTK,BTLA,C1QA,C1QC,C3AR1,C5,C9ORF72,CALHM6,CASP1,CAV1,CCR2,CCRL2,CD180,CD19,CD1C,CD22,CD274,CD40,CD86,CLEC10A,CLEC4C,CLEC7A,CTSL,CTSV,CXCL10,CXCL9,CYBB,DDX3X,DDX60,DTX3L,DUSP3,EIF2AK2,FCGR2B,FCRL2,FCRL5,FCRLA,FFAR2,FPR3,GBP1,GBP3,GCH1,GNAS,HERC5,HLA-DMA,HLA-DMB,HLA-DRA,IFI16,IFI27,IFI35,IFI44,IFI44L,IFI6,IFIH1,IFIT1,IFIT2,IFIT3,IFIT5,IFITM3,IFNE,IL1…
GO:BP	regulation of response to stimulus	GO:0048583	FALSE	2.75E-102	101.56	3993	744	221	78724	ADAR,AIM2,ARHGAP24,ARHGAP44,AUNIP,BANK1,BCAR3,BCL2L1,BEND6,BLNK,BST2,BTK,BTLA,C1QA,C1QC,C3AR1,C5,C9ORF72,CALHM6,CASP1,CAV1,CCR2,CD180,CD19,CD1C,CD22,CD274,CD40,CD86,CDK14,CHEK2,CLEC7A,CRYBA1,CTSL,CTSV,CXCL10,DDAH1,DDIAS,DDX3X,DDX60,DEPDC1B,DTX3L,DUSP3,EIF2AK1,EIF2AK2,FAP,FCGR2B,FECH,FFAR2,FGD4,FPR3,FSTL1,GBP1,GBP3,GCH1,GCNT2,GNAS,GPC4,HERC5,HGF,HHEX,HLA-DMA,HLA-DMB,HLA-DRA,HSPB1,IFI16,IFI35,IFI6,…
GO:BP	response to external stimulus	GO:0009605	FALSE	2.20E-99	98.6569	2415	744	177	78724	ADAR,AICDA,AIM2,ANOS1,APOBEC3A,ATP1B1,BANK1,BCL2L1,BST2,BTK,C1QA,C1QC,C3AR1,C5,CALB1,CALHM6,CASP1,CASP7,CAV1,CCR2,CCRL2,CD180,CD274,CD40,CD86,CLEC10A,CLEC4C,CLEC7A,CMPK2,CSMD1,CXCL10,CXCL9,CYBB,DDX3X,DDX60,DDX60L,DOCK4,DTX3L,DUSP3,EIF2AK2,FAP,FCGR2B,FECH,FFAR2,FPR3,GBP1,GBP3,GCH1,GNAS,HERC5,HERC6,HGF,HSPB1,IFI16,IFI27,IFI35,IFI44,IFI44L,IFI6,IFIH1,IFIT1,IFIT2,IFIT3,IFIT5,IFITM3,IFNE,IL15,IL2,IL31…
GO:BP	primary metabolic process	GO:0044238	FALSE	4.22E-98	97.3745	12342	744	365	78724	AANAT,ABCG2,ACO1,ACOT9,ADAM28,ADAR,ADCY6,AICDA,AIM2,ALAS2,ALDH1A1,APOBEC3A,APOL6,ATP1B1,AUNIP,BANK1,BAZ2B,BCAR3,BCL11A,BEND6,BHLHE41,BTK,C1GALT1,C9ORF72,CASP1,CASP7,CAV1,CD274,CD40,CD86,CDK14,CHEK2,CLEC7A,CMPK2,CPVL,CREB5,CTSE,CTSL,CTSV,CXCL10,DAPP1,DCAF12,DDAH1,DDX3X,DHRS9,DSE,DTX3L,DUSP3,E2F8,EAF2,EIF2AK1,EIF2AK2,EIF2S3,EIF2S3B,ENSG00000288721,ENTPD2,ETV7,FAM8A1,FANCL,FAP,FECH,FGGY,GALNT5,GALNT…
GO:BP	multicellular organism development	GO:0007275	FALSE	5.45E-93	92.2632	4727	744	227	78724	ACO1,ADAR,ADCY6,AICDA,AIM2,ANOS1,ARHGAP24,ARHGAP44,BAHCC1,BCAR3,BCL11A,BCL2L1,BEND6,BHLHE41,BTK,C1GALT1,C1QA,C1QC,C3AR1,C9ORF72,CALB1,CALCRL,CASP7,CAV1,CC2D2A,CCDC39,CCR2,CD40,CD86,COL19A1,COL4A3,CRYBA1,CSMD1,CXCL10,CYBB,DDAH1,DIAPH3,DOCK4,DRAM2,E2F8,EAF2,EPB41L3,FAM151B,FAM210B,FAP,FCGR2B,GCNT1,GCNT2,GNAS,GNB4,GPC4,H4C1,HESX1,HEXB,HGF,HHEX,HLA-DRA,HORMAD1,HSD17B4,HSPB1,IDH1,IL15,IL1RN,IL2,IL4I1,…
GO:BP	negative regulation of biological process	GO:0048519	FALSE	1.36E-87	86.8657	5834	744	243	78724	ACO1,ADAR,ADCY6,AICDA,AIM2,ALDH1A1,ANXA5,APOBEC3A,ARHGAP24,ARHGAP44,AUNIP,BANK1,BCL11A,BCL2L1,BEND6,BHLHE41,BST2,BTK,C1QC,C5,C9ORF72,CAV1,CCR2,CD19,CD22,CD274,CHEK2,CLIC2,COL4A3,CRYBA1,CXCL10,CXCL9,DDAH1,DDIAS,DDX3X,DIAPH3,DOCK4,DTX3L,DUSP3,E2F8,EAF2,EIF2AK1,EIF2AK2,ETV7,FAP,FCGR2B,FFAR2,FSTL1,GBP1,GCH1,GCNT2,GNAS,H4C1,HELZ2,HESX1,HGF,HHEX,HORMAD1,HSPB1,IFI16,IFI27,IFI35,IFI6,IFIH1,IFIT1,IFIT3,IF…
GO:BP	regulation of metabolic process	GO:0019222	FALSE	9.64E-86	85.0158	7035	744	263	78724	ACO1,ADAR,AFF1,AICDA,AIM2,ALDH1A1,APOBEC3A,ATP1B1,AUNIP,BANK1,BAZ2B,BCAR3,BCL11A,BCL2L1,BEND6,BHLHE41,BLNK,BST2,BTK,C3AR1,C5,C9ORF72,CALHM6,CASP1,CAV1,CCR2,CD22,CD274,CD40,CD86,CHEK2,CLEC7A,CREB5,CRYBA1,CXCL10,CYBB,DCAF12,DDAH1,DDX3X,DRAM2,DTX3L,DUSP3,E2F8,EAF2,EIF2AK1,EIF2AK2,ENSG00000288721,ETV7,FAP,FCGR2B,FECH,FFAR2,GBP1,GCH1,GCNT2,GNAS,HELZ2,HERC5,HESX1,HEXB,HGF,HHEX,HNRNPH3,HSPB1,IDH1,IFI16,…
GO:BP	defense response	GO:0006952	FALSE	8.10E-85	84.0913	1853	744	146	78724	ADAR,AICDA,AIM2,APOBEC3A,ATP1B1,BCL2L1,BLNK,BST2,BTK,C1QA,C1QC,C3AR1,C5,CALHM6,CASP1,CASP7,CAV1,CCR2,CCRL2,CD180,CD274,CD40,CLEC10A,CLEC4C,CLEC7A,CXCL10,CXCL9,CYBB,DDX3X,DDX60,DDX60L,DTX3L,EIF2AK1,EIF2AK2,FCGR2B,FFAR2,FOLR2,FPR3,GBP1,GBP3,GCH1,GNAS,HERC5,HGF,IFI16,IFI27,IFI35,IFI44L,IFI6,IFIH1,IFIT1,IFIT2,IFIT3,IFIT5,IFITM3,IFNE,IL15,IL1RN,IL2,IL31RA,INHBB,IRAK3,IRF7,IRF9,ISG15,JAK2,LACC1,LGALS9,…
GO:BP	response to chemical	GO:0042221	FALSE	1.66E-83	82.7786	3909	744	198	78724	AANAT,ABCG2,ACO1,ADAR,ADCY6,AICDA,AIM2,ALDH1A1,ANOS1,BCAR3,BCL11A,BCL2L1,BST2,BTK,C3AR1,C5,CACNA1A,CALCRL,CASP1,CASP7,CAV1,CCR2,CCRL2,CD180,CD274,CD40,CD86,CLEC7A,CLIC2,CMPK2,COL4A3,CPNE8,CTSL,CXCL10,CXCL9,CYBB,DDAH1,DDX3X,DOCK4,DUSP3,EIF2AK2,FAM210B,FAM8A1,FCGR2B,FECH,FFAR2,FOLR2,FPR3,GBP1,GBP3,GCH1,GCNT1,GNAS,HESX1,HGF,HSPB1,IDH1,IFI16,IFI27,IFIH1,IFIT1,IFITM3,IFNE,IL15,IL1RN,IL2,IL31RA,IL7,INH…
GO:BP	biological process involved in interspecies interaction between organisms	GO:0044419	FALSE	1.25E-81	80.9025	1759	744	140	78724	ADAR,AICDA,AIM2,APOBEC3A,ATP1B1,BANK1,BCL2L1,BST2,BTK,C1QA,C1QC,C5,CALHM6,CASP1,CASP7,CAV1,CD180,CD274,CD40,CD86,CHD1,CLEC10A,CLEC4C,CLEC7A,CMPK2,CTSL,CXCL10,CXCL9,CYBB,DDX3X,DDX60,DDX60L,DTX3L,EIF2AK2,FCGR2B,FFAR2,GBP1,GBP3,GCH1,GYPA,HERC5,HERC6,HSPB1,IFI16,IFI27,IFI35,IFI44,IFI44L,IFI6,IFIH1,IFIT1,IFIT2,IFIT3,IFIT5,IFITM3,IFNE,IL15,IL31RA,INHBB,IRAK3,IRF7,IRF9,ISG15,JAK2,KMO,LACC1,LGALS9,LY6E,L…
GO:BP	negative regulation of cellular process	GO:0048523	FALSE	3.05E-81	80.5153	5629	744	231	78724	ACO1,ADAR,ADCY6,AICDA,AIM2,ALDH1A1,ANXA5,APOBEC3A,ARHGAP24,ARHGAP44,AUNIP,BANK1,BCL11A,BCL2L1,BEND6,BHLHE41,BST2,BTK,C1QC,C5,C9ORF72,CAV1,CCR2,CD19,CD22,CD274,CHEK2,CLIC2,COL4A3,CRYBA1,CXCL10,CXCL9,DDAH1,DDIAS,DDX3X,DIAPH3,DTX3L,DUSP3,E2F8,EAF2,EIF2AK1,EIF2AK2,ETV7,FAP,FCGR2B,FFAR2,FSTL1,GBP1,GCH1,GCNT2,H4C1,HELZ2,HESX1,HGF,HHEX,HORMAD1,HSPB1,IFI16,IFI27,IFI35,IFI6,IFIT3,IL15,IL1RN,IL2,IL31RA,IL4…
GO:BP	macromolecule metabolic process	GO:0043170	FALSE	7.56E-81	80.1217	12048	744	336	78724	AANAT,ACO1,ADAM28,ADAR,AFF1,AICDA,AIM2,ALAS2,APOBEC3A,APOL6,ATP1B1,AUNIP,BANK1,BAZ2B,BCAR3,BCL11A,BEND6,BHLHE41,BLNK,BST2,BTK,C1GALT1,C3AR1,C5,C9ORF72,CALHM6,CASP1,CASP7,CAV1,CCR2,CD22,CD274,CD40,CD86,CDK14,CHEK2,CLEC7A,CPVL,CREB5,CRYBA1,CTSE,CTSL,CTSV,CXCL10,CYBB,DAPP1,DCAF12,DDX3X,DIAPH3,DSE,DTX3L,DUSP3,E2F8,EAF2,EIF2AK1,EIF2AK2,EIF2S3,EIF2S3B,ENSG00000288721,ETV7,FAM8A1,FANCL,FAP,FCGR2B,FECH,F…
GO:BP	response to biotic stimulus	GO:0009607	FALSE	1.49E-80	79.828	1634	744	135	78724	ADAR,AICDA,AIM2,APOBEC3A,ATP1B1,BANK1,BCL2L1,BST2,BTK,C1QA,C1QC,C5,CALHM6,CASP1,CASP7,CAV1,CD180,CD274,CD40,CD86,CLEC10A,CLEC4C,CLEC7A,CMPK2,CXCL10,CXCL9,CYBB,DDX3X,DDX60,DDX60L,DTX3L,EIF2AK2,FAP,FCGR2B,FFAR2,GBP1,GBP3,GCH1,HERC5,HERC6,HSPB1,IFI16,IFI27,IFI35,IFI44,IFI44L,IFI6,IFIH1,IFIT1,IFIT2,IFIT3,IFIT5,IFITM3,IFNE,IL15,IL31RA,IL4I1,IRAK3,IRF7,IRF9,ISG15,JAK2,KMO,LACC1,LGALS9,LY6E,LYST,LYZ,MAO…
GO:BP	response to other organism	GO:0051707	FALSE	8.04E-79	78.0949	1592	744	132	78724	ADAR,AICDA,AIM2,APOBEC3A,ATP1B1,BANK1,BCL2L1,BST2,BTK,C1QA,C1QC,C5,CALHM6,CASP1,CASP7,CAV1,CD180,CD274,CD40,CD86,CLEC10A,CLEC4C,CLEC7A,CMPK2,CXCL10,CXCL9,CYBB,DDX3X,DDX60,DDX60L,DTX3L,EIF2AK2,FCGR2B,FFAR2,GBP1,GBP3,GCH1,HERC5,HERC6,HSPB1,IFI16,IFI27,IFI35,IFI44,IFI44L,IFI6,IFIH1,IFIT1,IFIT2,IFIT3,IFIT5,IFITM3,IFNE,IL15,IL31RA,IRAK3,IRF7,IRF9,ISG15,JAK2,KMO,LACC1,LGALS9,LY6E,LYST,LYZ,MAOB,MAP2K6,M…
GO:BP	response to external biotic stimulus	GO:0043207	FALSE	1.02E-78	77.9925	1595	744	132	78724	ADAR,AICDA,AIM2,APOBEC3A,ATP1B1,BANK1,BCL2L1,BST2,BTK,C1QA,C1QC,C5,CALHM6,CASP1,CASP7,CAV1,CD180,CD274,CD40,CD86,CLEC10A,CLEC4C,CLEC7A,CMPK2,CXCL10,CXCL9,CYBB,DDX3X,DDX60,DDX60L,DTX3L,EIF2AK2,FCGR2B,FFAR2,GBP1,GBP3,GCH1,HERC5,HERC6,HSPB1,IFI16,IFI27,IFI35,IFI44,IFI44L,IFI6,IFIH1,IFIT1,IFIT2,IFIT3,IFIT5,IFITM3,IFNE,IL15,IL31RA,IRAK3,IRF7,IRF9,ISG15,JAK2,KMO,LACC1,LGALS9,LY6E,LYST,LYZ,MAOB,MAP2K6,M…
GO:BP	intracellular signal transduction	GO:0035556	FALSE	1.53E-77	76.8143	2965	744	169	78724	ADCY6,AIM2,ARHGAP24,ARHGAP44,ATP1B1,BANK1,BCAR3,BCL2L1,BLNK,BST2,BTK,C3AR1,C9ORF72,CASP1,CAV1,CCDC68,CCR2,CCRL2,CD19,CD22,CD40,CD86,CHEK2,CLEC7A,CLIC2,CRYBA1,CYBB,DDAH1,DDIAS,DDX3X,DDX60,DEPDC1B,DOCK4,DTX3L,DUSP3,EIF2AK1,EIF2AK2,FCGR2B,FGD4,GBP1,GCNT2,HERC5,HESX1,HGF,HORMAD1,HSPB1,IFI16,IFI35,IFI6,IFIH1,IFIT5,IL31RA,IRAK3,IRF7,JAK2,KANK2,KDM6A,KIAA0319,LACC1,LGALS9,MAP2K6,MAP3K20,MARCO,MOB3B,NAIP…
GO:BP	cell surface receptor signaling pathway	GO:0007166	FALSE	3.25E-77	76.4883	2819	744	165	78724	ADAR,AIM2,BANK1,BCAR3,BCL2L1,BEND6,BLNK,BTK,BTLA,C3AR1,C5,CALCRL,CASP1,CAV1,CC2D2A,CCR2,CCRL2,CD180,CD19,CD22,CD274,CD40,CD86,CDK14,CLEC1A,CLEC7A,COL4A3,CXCL10,CXCL9,DDX3X,DEPDC1B,DIAPH3,DTX3L,DUSP3,FCGR2B,FCRL2,FCRL5,FCRLA,FFAR2,FPR3,FSTL1,GBP1,GCNT2,GPC4,HESX1,HGF,HHEX,HSPB1,IFI27,IFI35,IFI6,IFIH1,IFITM3,IFNE,IL15,IL1RN,IL2,IL31RA,IL7,INHBB,IRAK3,IRF7,IRF9,ISG15,JAK2,KIAA0319,LRRFIP2,LY6E,MARCO…
GO:BP	regulation of macromolecule metabolic process	GO:0060255	FALSE	2.35E-74	73.6297	6492	744	238	78724	ACO1,ADAR,AFF1,AICDA,AIM2,APOBEC3A,ATP1B1,AUNIP,BANK1,BAZ2B,BCAR3,BCL11A,BEND6,BHLHE41,BLNK,BST2,BTK,C3AR1,C5,C9ORF72,CALHM6,CASP1,CAV1,CCR2,CD22,CD274,CD40,CD86,CHEK2,CLEC7A,CREB5,CRYBA1,CXCL10,CYBB,DDX3X,DTX3L,DUSP3,E2F8,EAF2,EIF2AK1,EIF2AK2,ENSG00000288721,ETV7,FCGR2B,FECH,FFAR2,GBP1,GCH1,GCNT2,HELZ2,HERC5,HESX1,HEXB,HGF,HHEX,HNRNPH3,HSPB1,IFI16,IFI27,IFIH1,IL15,IL2,IL31RA,IL4I1,IL7,INHBB,IRAK…
GO:BP	defense response to other organism	GO:0098542	FALSE	1.61E-73	72.7931	1263	744	116	78724	ADAR,AICDA,AIM2,APOBEC3A,ATP1B1,BCL2L1,BST2,BTK,C1QA,C1QC,C5,CALHM6,CASP1,CASP7,CAV1,CD180,CD274,CD40,CLEC10A,CLEC4C,CLEC7A,CXCL10,CXCL9,CYBB,DDX3X,DDX60,DDX60L,DTX3L,EIF2AK2,FCGR2B,FFAR2,GBP1,GBP3,GCH1,HERC5,IFI16,IFI27,IFI35,IFI44L,IFI6,IFIH1,IFIT1,IFIT2,IFIT3,IFIT5,IFITM3,IFNE,IL15,IL31RA,IRAK3,IRF7,IRF9,ISG15,JAK2,LACC1,LGALS9,LY6E,LYST,LYZ,MAP2K6,MARCO,MLKL,MRC1,MX1,MX2,NAIP,NT5C2,NUB1,OAS1,…
GO:BP	cell differentiation	GO:0030154	FALSE	3.21E-73	72.4931	4437	744	197	78724	ADAR,ADCY6,AICDA,ALAS2,ANOS1,ARHGAP24,ARHGAP44,ARL4A,BAHCC1,BCL11A,BCL2L1,BEND6,BHLHE41,BLNK,BTK,C1GALT1,C1QA,C1QC,C9ORF72,CASP7,CAV1,CCR2,CD19,CD86,CFAP54,CLEC7A,COL19A1,CTSL,CXCL10,CXCL9,DDX3X,DHRS9,DIAPH3,DNAJC13,E2F8,EIF2AK1,EIF2AK2,EPB41L3,FAM151B,FAM210B,FCGR2B,FCRLA,FECH,FFAR2,FSTL1,GCNT2,GLRX5,H4C1,HERC6,HESX1,HEXB,HGF,HHEX,HLA-DRA,HNRNPH3,HORMAD1,HSD17B4,IFI16,IFNE,IL15,IL2,IL31RA,IL4I1,…
GO:BP	cellular developmental process	GO:0048869	FALSE	3.34E-73	72.4766	4438	744	197	78724	ADAR,ADCY6,AICDA,ALAS2,ANOS1,ARHGAP24,ARHGAP44,ARL4A,BAHCC1,BCL11A,BCL2L1,BEND6,BHLHE41,BLNK,BTK,C1GALT1,C1QA,C1QC,C9ORF72,CASP7,CAV1,CCR2,CD19,CD86,CFAP54,CLEC7A,COL19A1,CTSL,CXCL10,CXCL9,DDX3X,DHRS9,DIAPH3,DNAJC13,E2F8,EIF2AK1,EIF2AK2,EPB41L3,FAM151B,FAM210B,FCGR2B,FCRLA,FECH,FFAR2,FSTL1,GCNT2,GLRX5,H4C1,HERC6,HESX1,HEXB,HGF,HHEX,HLA-DRA,HNRNPH3,HORMAD1,HSD17B4,IFI16,IFNE,IL15,IL2,IL31RA,IL4I1,…
GO:BP	localization	GO:0051179	FALSE	4.21E-73	72.3752	5555	744	219	78724	ABCG2,ADAR,ANO5,AP1S2,AP1S3,APOL6,ARHGAP44,ARL4A,ATP10D,ATP1B1,BCL2L1,BTK,C9ORF72,CACNA1A,CACNA1E,CACNA2D3,CALCRL,CALHM6,CAV1,CC2D2A,CCDC39,CCDC68,CCR2,CD151,CD19,CD22,CFAP54,CLCN1,CLEC10A,CLEC7A,CLIC2,CRYBA1,CTSL,CXCL10,CXCL9,CYBB,DDX3X,DENND5B,DIAPH3,DNAJC13,DNM1,DTX3L,EIF2AK1,EPB41L3,EVI5,EXOC3L1,FCGR2B,FFAR2,FOLR2,FOLR3,GBP1,GNAS,GOLPH3L,GPC4,H4C1,HEXB,HHEX,HPS5,HSPB1,IFI27,IFIT1,IL15,IL1RN,I…
GO:BP	system development	GO:0048731	FALSE	1.76E-72	71.7546	4053	744	188	78724	ADAR,ADCY6,AICDA,AIM2,ANOS1,ARHGAP24,ARHGAP44,BAHCC1,BCAR3,BCL11A,BCL2L1,BEND6,BHLHE41,C1GALT1,C1QA,C3AR1,C9ORF72,CALB1,CALCRL,CASP7,CAV1,CC2D2A,CCDC39,CCR2,CD40,COL19A1,COL4A3,CRYBA1,CSMD1,CXCL10,CYBB,DDAH1,DIAPH3,DOCK4,DRAM2,E2F8,EAF2,EPB41L3,FAM151B,FAP,FCGR2B,GCNT1,GNAS,GNB4,GPC4,HESX1,HEXB,HGF,HHEX,HSD17B4,HSPB1,IDH1,IL15,IL2,INHBB,IRAK3,JAK2,KANK2,KDM6A,KIAA0319,LGALS9,MAMDC2,MAOB,MAP2,MAP2…
GO:BP	regulation of signaling	GO:0023051	FALSE	3.35E-72	71.4753	3478	744	175	78724	ADAR,AIM2,ARHGAP24,ARHGAP44,BANK1,BCAR3,BCL2L1,BEND6,BST2,BTK,C9ORF72,CACNA1A,CALB1,CASP1,CAV1,CCR2,CD180,CD19,CD22,CD40,CD86,CDK14,CHEK2,CLEC7A,CRYBA1,CTSL,CTSV,DDIAS,DDX3X,DDX60,DEPDC1B,DNM1,DUSP3,EIF2AK2,FCGR2B,FFAR2,FGD4,FSTL1,GBP1,GCNT2,GNAS,GPC4,HGF,HHEX,HSPB1,IFI35,IFI6,IFIT5,IL1RN,IL7,INHBB,IRAK3,IRF7,ISG15,JAK2,KANK2,KDM6A,KIAA0319,KMO,LGALS9,MAP2K6,MAP3K20,MARCO,MOB3B,NAIP,NCKAP1L,NLGN1…
GO:BP	cellular component organization	GO:0016043	FALSE	1.59E-71	70.7998	8184	744	263	78724	ADAR,ADCY6,AICDA,AIM2,ANO5,ANOS1,AP1S2,AP1S3,APOBEC3A,ARHGAP24,ARHGAP44,ATP10D,ATP1B1,AUNIP,BAHCC1,BAZ2B,BCL11A,BCL2L1,BST2,BTK,C1QA,C1QB,C1QC,C9ORF72,CACNA2D3,CASP1,CASP7,CAV1,CC2D2A,CCDC39,CCDC68,CCNA1,CD151,CD22,CD40,CEP162,CFAP54,CHD1,CHEK2,CIP2A,CLEC7A,COL19A1,COL4A3,CTSL,CTSV,CXCL10,CXCL9,DDX3X,DIAPH3,DNAH8,DNAJC13,DNM1,DOCK4,DTX3L,DUSP3,EAF2,EIF2AK2,EIF2S3,EIF2S3B,EMP1,EPB41L3,FAP,FCGR2B,F…
GO:BP	cellular component organization or biogenesis	GO:0071840	FALSE	3.00E-71	70.5222	8393	744	266	78724	ADAR,ADCY6,AICDA,AIM2,ANO5,ANOS1,AP1S2,AP1S3,APOBEC3A,ARHGAP24,ARHGAP44,ATP10D,ATP1B1,AUNIP,BAHCC1,BAZ2B,BCL11A,BCL2L1,BST2,BTK,C1QA,C1QB,C1QC,C9ORF72,CACNA2D3,CASP1,CASP7,CAV1,CC2D2A,CCDC39,CCDC68,CCNA1,CD151,CD22,CD40,CEP162,CFAP54,CHD1,CHEK2,CIP2A,CLEC7A,COL19A1,COL4A3,CTSL,CTSV,CXCL10,CXCL9,DDX3X,DIAPH3,DNAH8,DNAJC13,DNM1,DOCK4,DTX3L,DUSP3,EAF2,EIF2AK2,EIF2S3,EIF2S3B,EMP1,EPB41L3,FAP,FCGR2B,F…
GO:BP	regulation of cell communication	GO:0010646	FALSE	3.30E-71	70.4816	3486	744	174	78724	ADAR,AIM2,ARHGAP24,ARHGAP44,BANK1,BCAR3,BCL2L1,BEND6,BST2,BTK,C9ORF72,CACNA1A,CALB1,CASP1,CAV1,CCR2,CD180,CD19,CD22,CD40,CD86,CDK14,CHEK2,CLEC7A,CRYBA1,CTSL,CTSV,DDIAS,DDX3X,DDX60,DEPDC1B,DNM1,DUSP3,EIF2AK2,FCGR2B,FFAR2,FGD4,FSTL1,GBP1,GCNT2,GNAS,GPC4,HGF,HHEX,HSPB1,IFI35,IFI6,IFIT5,IL1RN,IL7,INHBB,IRAK3,IRF7,ISG15,JAK2,KANK2,KDM6A,KIAA0319,KMO,LGALS9,MAP2K6,MAP3K20,MARCO,MOB3B,NAIP,NCKAP1L,NLGN1…
GO:BP	regulation of multicellular organismal process	GO:0051239	FALSE	1.20E-70	69.9221	2956	744	161	78724	AIM2,ALDH1A1,ANXA5,ATP1B1,BANK1,BCL11A,BHLHE41,BST2,BTK,C1QC,C3AR1,C5,CALHM6,CASP1,CAV1,CCR2,CD19,CD22,CD274,CD40,CD86,CLEC7A,CLIC2,COL4A3,CRYBA1,CXCL10,CYBB,DDAH1,DDX3X,DOCK4,DUSP3,EAF2,EIF2AK2,FAM210B,FAP,FCGR2B,FFAR2,GBP1,GCH1,GCNT2,GNAS,H4C1,HESX1,HGF,HHEX,HLA-DMA,HLA-DMB,HLA-DRA,HSPB1,IFI16,IFIH1,IL15,IL2,IL31RA,IL4I1,IL7,INHBB,IRAK3,IRF7,ISG15,JAK2,KIAA0319,LACC1,LGALS9,MAP2,MAP2K6,MILR1,NA…
GO:BP	regulation of biosynthetic process	GO:0009889	FALSE	7.98E-69	68.0978	5809	744	218	78724	ACO1,ADAR,AFF1,AICDA,AIM2,APOBEC3A,ATP1B1,BANK1,BAZ2B,BCL11A,BEND6,BHLHE41,BLNK,BST2,BTK,C3AR1,C5,CALHM6,CASP1,CAV1,CCR2,CD22,CD274,CD40,CD86,CHEK2,CLEC7A,CREB5,CRYBA1,CXCL10,CYBB,DDAH1,DDX3X,DTX3L,E2F8,EAF2,EIF2AK1,EIF2AK2,ENSG00000288721,ETV7,FCGR2B,FECH,FFAR2,GBP1,GCH1,GCNT2,HELZ2,HESX1,HEXB,HGF,HHEX,HNRNPH3,HSPB1,IDH1,IFI16,IFI27,IFIH1,IL15,IL2,IL31RA,IL4I1,IL7,INHBB,IRAK3,IRF7,IRF9,ISG15,JAK…
GO:BP	regulation of primary metabolic process	GO:0080090	FALSE	1.05E-68	67.9771	5390	744	210	78724	ACO1,ADAR,AICDA,AIM2,APOBEC3A,AUNIP,BANK1,BAZ2B,BCAR3,BCL11A,BEND6,BHLHE41,BTK,C9ORF72,CAV1,CD274,CD40,CD86,CHEK2,CLEC7A,CREB5,CXCL10,DDX3X,DTX3L,DUSP3,E2F8,EAF2,EIF2AK1,EIF2AK2,ENSG00000288721,ETV7,FECH,GCH1,HELZ2,HERC5,HESX1,HEXB,HGF,HHEX,HNRNPH3,HSPB1,IDH1,IFI16,IFI27,IL15,IL2,IL31RA,IL4I1,IL7,INHBB,IRAK3,IRF7,IRF9,ISG15,JAK2,KANK2,KDM6A,LACC1,LACTB,LAMP3,LGALS9,LMO2,LRRFIP2,MACC1,MAOB,MAP3K20…
GO:BP	regulation of signal transduction	GO:0009966	FALSE	3.53E-68	67.4522	3034	744	160	78724	ADAR,AIM2,ARHGAP24,ARHGAP44,BANK1,BCAR3,BCL2L1,BEND6,BST2,BTK,C9ORF72,CASP1,CAV1,CCR2,CD180,CD19,CD22,CD40,CD86,CDK14,CHEK2,CLEC7A,CRYBA1,CTSL,CTSV,DDIAS,DDX3X,DDX60,DEPDC1B,DUSP3,EIF2AK2,FCGR2B,FGD4,FSTL1,GBP1,GCNT2,GPC4,HGF,HHEX,HSPB1,IFI35,IFI6,IFIT5,IL1RN,IL7,INHBB,IRAK3,IRF7,ISG15,JAK2,KANK2,KDM6A,KIAA0319,LGALS9,MAP2K6,MAP3K20,MARCO,MOB3B,NAIP,NCKAP1L,NLGN1,NRG1,NTSR1,OAS1,OAS3,OASL,PARP14,…
GO:BP	regulation of gene expression	GO:0010468	FALSE	3.80E-68	67.4202	5536	744	212	78724	ACO1,ADAR,AFF1,AICDA,AIM2,APOBEC3A,ATP1B1,BANK1,BAZ2B,BCL11A,BEND6,BHLHE41,BLNK,BST2,BTK,C3AR1,C5,CALHM6,CASP1,CAV1,CCR2,CD22,CD274,CD40,CD86,CHEK2,CLEC7A,CREB5,CRYBA1,CXCL10,CYBB,DDX3X,DTX3L,E2F8,EAF2,EIF2AK1,EIF2AK2,ENSG00000288721,ETV7,FCGR2B,FECH,FFAR2,GBP1,GCNT2,HELZ2,HESX1,HEXB,HGF,HHEX,HNRNPH3,HSPB1,IFI16,IFI27,IFIH1,IL15,IL2,IL31RA,IL4I1,IL7,INHBB,IRAK3,IRF7,IRF9,ISG15,JAK2,KANK2,KDM6A,LA…
GO:BP	regulation of macromolecule biosynthetic process	GO:0010556	FALSE	3.91E-68	67.4077	5644	744	214	78724	ACO1,ADAR,AFF1,AICDA,AIM2,APOBEC3A,ATP1B1,BANK1,BAZ2B,BCL11A,BEND6,BHLHE41,BLNK,BST2,BTK,C3AR1,C5,CALHM6,CASP1,CAV1,CCR2,CD22,CD274,CD40,CD86,CHEK2,CLEC7A,CREB5,CRYBA1,CXCL10,CYBB,DDX3X,DTX3L,E2F8,EAF2,EIF2AK1,EIF2AK2,ENSG00000288721,ETV7,FCGR2B,FECH,FFAR2,GBP1,GCH1,GCNT2,HELZ2,HESX1,HEXB,HGF,HHEX,HNRNPH3,HSPB1,IFI16,IFI27,IFIH1,IL15,IL2,IL31RA,IL4I1,IL7,INHBB,IRAK3,IRF7,IRF9,ISG15,JAK2,KANK2,KDM…
GO:BP	defense response to symbiont	GO:0140546	FALSE	3.32E-65	64.4788	1082	744	102	78724	ADAR,AIM2,APOBEC3A,ATP1B1,BST2,BTK,C1QA,C1QC,C5,CALHM6,CASP1,CAV1,CD180,CD274,CD40,CLEC10A,CLEC4C,CLEC7A,CXCL10,CXCL9,CYBB,DDX3X,DDX60,DTX3L,EIF2AK2,FCGR2B,FFAR2,GBP1,GBP3,GCH1,HERC5,IFI16,IFI27,IFI35,IFI6,IFIH1,IFIT1,IFIT2,IFIT3,IFIT5,IFITM3,IFNE,IRAK3,IRF7,ISG15,JAK2,LACC1,LGALS9,LY6E,LYST,LYZ,MAP2K6,MARCO,MRC1,MX1,MX2,NAIP,NUB1,OAS1,OAS2,OAS3,OASL,PARP14,PARP9,PIK3AP1,PLSCR1,RIOK3,RSAD2,SAMD9,…
GO:BP	regulation of immune system process	GO:0002682	FALSE	8.14E-65	64.0893	1581	744	118	78724	ADAR,AIM2,BANK1,BLNK,BST2,BTK,BTLA,C1QA,C1QC,C3AR1,C5,C9ORF72,CALHM6,CASP1,CAV1,CCR2,CD19,CD1C,CD22,CD274,CD40,CD86,CLEC7A,CXCL10,DDX3X,DDX60,DUSP3,EIF2AK2,FAM210B,FCGR2B,FFAR2,FPR3,GBP1,GCNT1,GNAS,H4C1,HLA-DMA,HLA-DMB,HLA-DRA,IFI16,IFI35,IFIH1,IL15,IL2,IL31RA,IL4I1,IL7,IRAK3,IRF7,ISG15,JAK2,LACC1,LGALS9,MAP2K6,MILR1,MS4A1,NAIP,NCKAP1L,OAS1,OAS3,OASL,PARP14,PARP9,PAWR,PIK3AP1,PLSCR1,PRLR,RB1,RIOK…
GO:BP	innate immune response	GO:0045087	FALSE	9.53E-65	64.0209	984	744	98	78724	ADAR,AIM2,APOBEC3A,ATP1B1,BST2,BTK,C1QA,C1QC,C5,CALHM6,CASP1,CAV1,CD180,CD274,CD40,CLEC10A,CLEC4C,CLEC7A,CXCL10,CYBB,DDX3X,DDX60,DTX3L,EIF2AK2,FCGR2B,FFAR2,GBP1,GBP3,GCH1,HERC5,IFI16,IFI27,IFI35,IFI6,IFIH1,IFIT1,IFIT2,IFIT3,IFIT5,IFITM3,IFNE,IRAK3,IRF7,ISG15,JAK2,LACC1,LGALS9,LY6E,LYST,MAP2K6,MARCO,MRC1,MX1,MX2,NAIP,NUB1,OAS1,OAS2,OAS3,OASL,PARP14,PARP9,PIK3AP1,PLSCR1,RIOK3,RSAD2,SAMD9,SCIMP,SERP…
GO:BP	transport	GO:0006810	FALSE	2.51E-64	63.6011	4407	744	185	78724	ABCG2,ADAR,ANO5,AP1S2,AP1S3,APOL6,ARHGAP44,ARL4A,ATP10D,ATP1B1,BCL2L1,BTK,C9ORF72,CACNA1A,CACNA1E,CACNA2D3,CALCRL,CALHM6,CAV1,CCDC39,CCR2,CD151,CD19,CD22,CFAP54,CLCN1,CLEC10A,CLEC7A,CLIC2,CRYBA1,CTSL,CXCL10,CXCL9,CYBB,DENND5B,DIAPH3,DNAJC13,DNM1,DTX3L,EIF2AK1,EVI5,EXOC3L1,FCGR2B,FFAR2,FOLR2,FOLR3,GNAS,GOLPH3L,HHEX,HPS5,HSPB1,IFI27,IFIT1,IL15,IL1RN,INHBB,JAK2,KCNH7,KMO,LGALS9,LYST,MAOB,MAP2,MAP2K6…
GO:BP	protein metabolic process	GO:0019538	FALSE	3.79E-64	63.4217	4721	744	191	78724	AANAT,ACO1,ADAM28,ADAR,ALAS2,APOL6,BANK1,BCAR3,BCL11A,BTK,C1GALT1,C9ORF72,CASP1,CASP7,CAV1,CD40,CD86,CDK14,CHEK2,CPVL,CTSE,CTSL,CTSV,DAPP1,DCAF12,DDX3X,DSE,DTX3L,DUSP3,EIF2AK1,EIF2AK2,EIF2S3,EIF2S3B,FAM8A1,FANCL,FAP,FECH,GALNT5,GALNTL6,GCNT1,GCNT2,HERC5,HERC6,HEXB,HGF,HHEX,HSPB1,IFI27,IFIH1,IL15,IL2,IL31RA,IL7,INHBB,IRAK3,ISG15,JAK2,KDM6A,LACTB,LAMP3,LAP3,MAP2K6,MAP3K20,MARCHF1,MARCHF3,MARCHF8,MI…
GO:BP	establishment of localization	GO:0051234	FALSE	2.18E-63	62.6618	4928	744	194	78724	ABCG2,ADAR,ANO5,AP1S2,AP1S3,APOL6,ARHGAP44,ARL4A,ATP10D,ATP1B1,BCL2L1,BTK,C9ORF72,CACNA1A,CACNA1E,CACNA2D3,CALCRL,CALHM6,CAV1,CCDC39,CCR2,CD151,CD19,CD22,CFAP54,CLCN1,CLEC10A,CLEC7A,CLIC2,CRYBA1,CTSL,CXCL10,CXCL9,CYBB,DENND5B,DIAPH3,DNAJC13,DNM1,DTX3L,EIF2AK1,EVI5,EXOC3L1,FCGR2B,FFAR2,FOLR2,FOLR3,GNAS,GOLPH3L,HHEX,HPS5,HSPB1,IFI27,IFIT1,IL15,IL1RN,INHBB,JAK2,KCNH7,KMO,LAMP3,LGALS9,LYST,MAOB,MAP2,…
GO:BP	positive regulation of response to stimulus	GO:0048584	FALSE	3.00E-62	61.5233	2331	744	136	78724	AIM2,BANK1,BCAR3,BLNK,BST2,BTK,C1QA,C1QC,C3AR1,C5,CASP1,CAV1,CCR2,CD180,CD19,CD1C,CD22,CD274,CD40,CD86,CLEC7A,CTSL,CTSV,CXCL10,DDX3X,DDX60,DEPDC1B,DUSP3,EIF2AK2,FCGR2B,FFAR2,FPR3,GBP1,GBP3,GCNT2,HGF,HHEX,HLA-DMA,HLA-DMB,HLA-DRA,HSPB1,IFI16,IFI35,IFIH1,IFIT5,IL15,IL2,IL7,INHBB,IRAK3,IRF7,JAK2,KIAA0319,LACC1,LGALS9,MAP2K6,MAP3K20,MARCO,MS4A1,NAIP,NCKAP1L,NLGN1,NRG1,OAS1,OAS3,OASL,OSMR,PARP14,PARP9,…
GO:BP	biosynthetic process	GO:0009058	FALSE	1.09E-61	60.9638	10664	744	286	78724	AANAT,ABCG2,ACO1,ADAR,ADCY6,AFF1,AICDA,AIM2,ALAS2,ALDH1A1,APOBEC3A,ATP1B1,BANK1,BAZ2B,BCL11A,BEND6,BHLHE41,BLNK,BST2,BTK,C1GALT1,C3AR1,C5,CALHM6,CASP1,CASP7,CAV1,CCR2,CD22,CD274,CD40,CD86,CHEK2,CLEC7A,CMPK2,CREB5,CRYBA1,CTSE,CTSL,CXCL10,CYBB,DDAH1,DDX3X,DHRS9,DIAPH3,DSE,DTX3L,E2F8,EAF2,EIF2AK1,EIF2AK2,EIF2S3,EIF2S3B,ENSG00000288721,ETV7,FCGR2B,FECH,FFAR2,GALNT5,GALNTL6,GBP1,GCH1,GCNT1,GCNT2,GK,H4…
GO:BP	positive regulation of metabolic process	GO:0009893	FALSE	1.68E-59	58.7744	3597	744	162	78724	ADAR,AICDA,AIM2,APOBEC3A,BANK1,BCAR3,BCL11A,BLNK,BTK,C3AR1,C5,C9ORF72,CASP1,CAV1,CCR2,CD274,CD40,CD86,CHEK2,CLEC7A,CREB5,CXCL10,CYBB,DDAH1,DDX3X,DTX3L,E2F8,EAF2,EIF2AK1,EIF2AK2,FCGR2B,FFAR2,GCH1,GNAS,HELZ2,HEXB,HGF,HHEX,HSPB1,IFI16,IFIH1,IL15,IL2,IL31RA,IL4I1,IL7,IRAK3,IRF7,IRF9,ISG15,JAK2,KDM6A,LACC1,LAMP3,LGALS9,LMO2,MACC1,MAOB,MRPL12,NAIP,NCKAP1L,NFIB,NRG1,NSF,NTSR1,NUB1,OAS1,OAS2,OAS3,PARP14,…
GO:BP	regulation of immune response	GO:0050776	FALSE	1.75E-58	57.7574	947	744	91	78724	ADAR,AIM2,BANK1,BLNK,BTK,BTLA,C1QA,C1QC,C3AR1,C5,C9ORF72,CALHM6,CASP1,CAV1,CCR2,CD19,CD1C,CD22,CD274,CD40,CD86,CLEC7A,DDX3X,DDX60,DUSP3,EIF2AK2,FCGR2B,FFAR2,FPR3,GBP1,GNAS,HLA-DMA,HLA-DMB,HLA-DRA,IFI16,IFI35,IFIH1,IL15,IL2,IL4I1,IRAK3,IRF7,ISG15,JAK2,LACC1,LGALS9,MAP2K6,MS4A1,NAIP,NCKAP1L,OAS1,OAS3,OASL,PARP14,PARP9,PAWR,PIK3AP1,PLSCR1,RIOK3,RSAD2,SCIMP,SERPING1,SLAMF1,SMPDL3A,STAT2,TLR10,TLR7,TN…
GO:BP	response to virus	GO:0009615	FALSE	4.67E-56	55.3303	414	744	66	78724	ADAR,AICDA,AIM2,APOBEC3A,BCL2L1,BST2,CASP1,CD40,CXCL10,CXCL9,DDX3X,DDX60,DDX60L,DTX3L,EIF2AK2,GBP1,GBP3,HERC5,HSPB1,IFI16,IFI27,IFI44,IFI44L,IFI6,IFIH1,IFIT1,IFIT2,IFIT3,IFIT5,IFITM3,IFNE,IL15,IRAK3,IRF7,IRF9,ISG15,JAK2,LGALS9,LYST,MLKL,MX1,MX2,NT5C2,OAS1,OAS2,OAS3,OASL,PARP9,PLSCR1,RIOK3,RSAD2,RTP4,STAT1,STAT2,TLR7,TRIM22,TRIM38,TRIM5,USP18,ZBP1,APOBEC3H,DDIT4,PRF1,SPON2,TBX21,TRIM32
GO:BP	positive regulation of macromolecule metabolic process	GO:0010604	FALSE	2.70E-55	54.5693	3288	744	150	78724	ADAR,AICDA,AIM2,APOBEC3A,BANK1,BCAR3,BCL11A,BLNK,BTK,C3AR1,C5,CASP1,CAV1,CCR2,CD274,CD40,CD86,CHEK2,CLEC7A,CREB5,CXCL10,CYBB,DDX3X,DTX3L,E2F8,EAF2,EIF2AK2,FCGR2B,FFAR2,GCH1,HELZ2,HEXB,HGF,HHEX,HSPB1,IFI16,IFIH1,IL15,IL2,IL31RA,IL4I1,IL7,IRAK3,IRF7,IRF9,ISG15,JAK2,KDM6A,LACC1,LAMP3,LGALS9,LMO2,MACC1,MRPL12,NAIP,NFIB,NRG1,NSF,NTSR1,NUB1,OAS1,OAS2,OAS3,PARP14,PARP9,PAWR,PAX5,PHIP,PLPP3,PLSCR1,PNPT1,…
GO:BP	defense response to virus	GO:0051607	FALSE	8.14E-54	53.0894	319	744	59	78724	ADAR,AICDA,AIM2,APOBEC3A,BCL2L1,BST2,CASP1,CD40,CXCL10,CXCL9,DDX60,DDX60L,DTX3L,EIF2AK2,GBP1,GBP3,HERC5,IFI16,IFI27,IFI44L,IFI6,IFIH1,IFIT1,IFIT2,IFIT3,IFIT5,IFITM3,IFNE,IL15,IRF7,IRF9,ISG15,LYST,MLKL,MX1,MX2,NT5C2,OAS1,OAS2,OAS3,OASL,PARP9,PLSCR1,RIOK3,RSAD2,RTP4,STAT1,STAT2,TLR7,TRIM22,TRIM38,TRIM5,USP18,ZBP1,APOBEC3H,DDIT4,PRF1,SPON2,TRIM32
GO:BP	intracellular signaling cassette	GO:0141124	FALSE	3.38E-53	52.4708	1912	744	115	78724	AIM2,ARHGAP24,ARHGAP44,ATP1B1,BANK1,BCAR3,BST2,BTK,C3AR1,CASP1,CAV1,CCR2,CCRL2,CD19,CD22,CD40,CD86,CLEC7A,CLIC2,CRYBA1,DDAH1,DDX3X,DOCK4,DUSP3,EIF2AK1,EIF2AK2,FCGR2B,FGD4,GBP1,GCNT2,HERC5,HESX1,HGF,HSPB1,IFI35,IFIT5,IL31RA,IRAK3,JAK2,KANK2,KIAA0319,LGALS9,MAP2K6,MAP3K20,MARCO,NAIP,NRG1,PIK3AP1,PIP5K1B,PLEKHG1,RALGPS2,RASGEF1B,RASGRP3,RB1,RICTOR,RIN2,RIOK3,SASH1,SCIMP,SIAH2,SLAMF1,SMAD1,STARD13,ST…
GO:BP	macromolecule modification	GO:0043412	FALSE	1.21E-52	51.918	3030	744	141	78724	AANAT,ADAR,AICDA,APOBEC3A,BANK1,BCAR3,BCL11A,BTK,C1GALT1,C9ORF72,CAV1,CD40,CDK14,CHEK2,DAPP1,DCAF12,DDX3X,DTX3L,DUSP3,EIF2AK1,EIF2AK2,FANCL,FECH,GALNT5,GALNTL6,GCNT1,GCNT2,HERC5,HERC6,HGF,HHEX,HSPB1,IFI27,IFIH1,IL15,IL2,IL31RA,IL7,IRAK3,ISG15,JAK2,KDM6A,MAP2K6,MAP3K20,MARCHF1,MARCHF3,MARCHF8,MBD4,MIB1,MLKL,NRG1,NSUN3,NT5C2,NUB1,PARP12,PARP14,PARP9,PDP1,PHIP,PKN2,PLPP3,PRLR,PTPRF,PTPRO,PUS10,RB1,R…
GO:BP	regulation of biological quality	GO:0065008	FALSE	1.64E-52	51.7848	2947	744	139	78724	AANAT,ADCY6,ALDH1A1,ANXA5,ARHGAP44,ATP10D,ATP1B1,BCL11A,BCL2L1,BTK,C3AR1,CACNA1A,CACNA2D3,CALB1,CAV1,CCR2,CCRL2,CD40,CHEK2,CLCN1,CTSL,DDAH1,DDIAS,DHRS9,DMXL1,DMXL2,DNM1,DOCK4,ENTPD2,EPB41L3,EXOC3L1,FAP,FCGR2B,FFAR2,FGD4,FPR3,GCH1,GNAS,GPC4,HEXB,HPS5,HSD17B4,HSD17B6,HSPB1,IFI6,IFIT1,IL1RN,IL2,IL4I1,INHBB,JAK2,KANK2,KCNH7,KDM6A,KIAA0319,MAP2,NCKAP1L,NLGN1,NRG1,NTSR1,OAS2,PALM2AKAP2,PDLIM5,PHIP,PLPP…
GO:BP	regulation of response to external stimulus	GO:0032101	FALSE	2.01E-52	51.696	1082	744	90	78724	ADAR,AIM2,BTK,C3AR1,C5,CALHM6,CASP1,CAV1,CCR2,CD180,CD274,CD40,CLEC7A,CXCL10,DDX3X,DDX60,DTX3L,DUSP3,EIF2AK2,FAP,FCGR2B,FFAR2,GBP1,GBP3,GNAS,HERC5,HGF,HSPB1,IFI16,IFI35,IFIH1,IL15,IL2,IRAK3,IRF7,ISG15,JAK2,KIAA0319,LACC1,LGALS9,MAP2K6,NAIP,NCKAP1L,NT5C2,OAS1,OAS3,OASL,OSMR,PARP14,PARP9,PIK3AP1,PLSCR1,PTPRF,PTPRO,RB1,RICTOR,RIOK3,RSAD2,SASH1,SCIMP,SERPINB2,SERPING1,SLAMF1,SMPDL3A,SNCA,STAT1,STAT2,…
GO:BP	protein modification process	GO:0036211	FALSE	2.47E-50	49.6075	2846	744	134	78724	AANAT,ADAR,BANK1,BCAR3,BCL11A,BTK,C1GALT1,C9ORF72,CAV1,CD40,CDK14,CHEK2,DAPP1,DCAF12,DDX3X,DTX3L,DUSP3,EIF2AK1,EIF2AK2,FANCL,FECH,GALNT5,GALNTL6,GCNT1,GCNT2,HERC5,HERC6,HGF,HHEX,HSPB1,IFI27,IFIH1,IL15,IL2,IL31RA,IL7,IRAK3,ISG15,JAK2,KDM6A,MAP2K6,MAP3K20,MARCHF1,MARCHF3,MARCHF8,MIB1,MLKL,NRG1,NT5C2,NUB1,PARP12,PARP14,PARP9,PDP1,PHIP,PKN2,PLPP3,PRLR,PTPRF,PTPRO,RB1,RICTOR,RIOK3,RPS6KC1,SASH1,SIAH2,…
GO:BP	phosphate-containing compound metabolic process	GO:0006796	FALSE	9.92E-49	48.0037	2407	744	122	78724	ACOT9,ADAR,ADCY6,ATP1B1,BANK1,BCAR3,BTK,C9ORF72,CAV1,CD40,CDK14,CHEK2,CMPK2,DAPP1,DDX3X,DUSP3,EIF2AK1,EIF2AK2,ENTPD2,FECH,FGGY,GK,HERC5,HEXB,HGF,HHEX,HSD17B4,HSPB1,IDH1,IL15,IL2,IL31RA,IL7,IRAK3,JAK2,KMO,LACC1,MAP2K6,MAP3K20,MBD4,MLKL,MTMR11,NCKAP1L,NDUFV3,NME4,NRG1,NT5C2,NTSR1,OSBPL10,PARP14,PARP9,PDP1,PHIP,PIGN,PIP5K1B,PKN2,PLPP3,PLSCR1,PRLR,PTPRF,PTPRO,PUDP,RB1,RICTOR,RIOK3,RPS6KC1,SASH1,SLC44…
GO:BP	anatomical structure morphogenesis	GO:0009653	FALSE	9.92E-49	48.0036	2713	744	129	78724	ANOS1,ARHGAP24,ARHGAP44,BCAR3,BCL11A,C1GALT1,C3AR1,C9ORF72,CALB1,CALCRL,CAV1,CC2D2A,CCDC39,CCR2,CD151,CD40,COL4A3,CSMD1,CXCL10,CXCL9,CYBB,DDAH1,E2F8,EPB41L3,ETV7,FAP,FGD4,GCNT1,GNAS,HESX1,HEXB,HGF,HHEX,HSPB1,IL1RN,IL7,KDM6A,KIAA0319,MAP2,MAP3K20,MIB1,NCKAP1L,NEXN,NFIB,NLGN1,NRG1,PALM2AKAP2,PAX5,PDLIM5,PHIP,PLPP3,PTPRO,RB1,RIN2,SASH1,SAT1,SEMA3C,SLC1A3,SLITRK4,SMAD1,SMTNL1,SOBP,SOX6,SP100,SPTA1,ST…
GO:BP	phosphorus metabolic process	GO:0006793	FALSE	1.13E-48	47.9465	2410	744	122	78724	ACOT9,ADAR,ADCY6,ATP1B1,BANK1,BCAR3,BTK,C9ORF72,CAV1,CD40,CDK14,CHEK2,CMPK2,DAPP1,DDX3X,DUSP3,EIF2AK1,EIF2AK2,ENTPD2,FECH,FGGY,GK,HERC5,HEXB,HGF,HHEX,HSD17B4,HSPB1,IDH1,IL15,IL2,IL31RA,IL7,IRAK3,JAK2,KMO,LACC1,MAP2K6,MAP3K20,MBD4,MLKL,MTMR11,NCKAP1L,NDUFV3,NME4,NRG1,NT5C2,NTSR1,OSBPL10,PARP14,PARP9,PDP1,PHIP,PIGN,PIP5K1B,PKN2,PLPP3,PLSCR1,PRLR,PTPRF,PTPRO,PUDP,RB1,RICTOR,RIOK3,RPS6KC1,SASH1,SLC44…
GO:BP	positive regulation of biosynthetic process	GO:0009891	FALSE	3.05E-48	47.5153	2696	744	128	78724	ADAR,AICDA,AIM2,APOBEC3A,BCL11A,BLNK,BTK,C3AR1,C5,CASP1,CAV1,CCR2,CD274,CD40,CD86,CHEK2,CLEC7A,CREB5,CXCL10,CYBB,DDAH1,DDX3X,DTX3L,E2F8,EAF2,EIF2AK2,FCGR2B,FFAR2,GCH1,HELZ2,HEXB,HGF,HHEX,HSPB1,IFI16,IFIH1,IL15,IL2,IL31RA,IL4I1,IL7,IRAK3,IRF7,IRF9,ISG15,JAK2,KDM6A,LACC1,LAMP3,LGALS9,LMO2,MACC1,MRPL12,NAIP,NFIB,NTSR1,OAS1,OAS2,OAS3,PARP9,PAWR,PAX5,PHIP,PLSCR1,RB1,RIOK3,RSAD2,S100A10,SAMD4A,SCIMP,SE…
GO:BP	cellular response to chemical stimulus	GO:0070887	FALSE	5.39E-48	47.2685	2192	744	116	78724	AANAT,ABCG2,ADCY6,AICDA,AIM2,ALDH1A1,BCAR3,BCL11A,BCL2L1,BTK,C3AR1,C5,CACNA1A,CALCRL,CASP1,CASP7,CAV1,CCR2,CCRL2,CD180,CD274,CD40,CD86,CLEC7A,CLIC2,CMPK2,CPNE8,CTSL,CXCL10,CXCL9,CYBB,DDAH1,DDX3X,DOCK4,FAM210B,FCGR2B,FECH,FFAR2,FOLR2,GBP3,GCH1,GNAS,HESX1,HGF,HSPB1,IFIH1,IFIT1,INHBB,IRAK3,JAK2,KANK2,KDM6A,KMO,LGALS9,LYST,MAP2K6,MRC1,NCKAP1L,NLGN1,PAWR,PHIP,PLSCR4,PNPT1,PRLR,PTPRO,RB1,RIOK3,SASH1,SC…
GO:BP	positive regulation of macromolecule biosynthetic process	GO:0010557	FALSE	1.06E-47	46.9758	2593	744	125	78724	ADAR,AICDA,AIM2,APOBEC3A,BCL11A,BLNK,BTK,C3AR1,C5,CASP1,CAV1,CCR2,CD274,CD40,CD86,CHEK2,CLEC7A,CREB5,CXCL10,CYBB,DDX3X,DTX3L,E2F8,EAF2,EIF2AK2,FCGR2B,FFAR2,GCH1,HELZ2,HEXB,HGF,HHEX,HSPB1,IFI16,IFIH1,IL15,IL2,IL31RA,IL4I1,IL7,IRAK3,IRF7,IRF9,ISG15,JAK2,KDM6A,LACC1,LAMP3,LGALS9,LMO2,MACC1,MRPL12,NAIP,NFIB,NTSR1,OAS1,OAS2,OAS3,PARP9,PAWR,PAX5,PHIP,PLSCR1,RB1,RIOK3,RSAD2,S100A10,SAMD4A,SCIMP,SETSIP,S…
GO:BP	macromolecule biosynthetic process	GO:0009059	FALSE	1.51E-47	46.8215	9643	744	247	78724	AANAT,ACO1,ADAR,AFF1,AICDA,AIM2,ALAS2,APOBEC3A,ATP1B1,BANK1,BAZ2B,BCL11A,BEND6,BHLHE41,BLNK,BST2,BTK,C1GALT1,C3AR1,C5,CALHM6,CASP1,CASP7,CAV1,CCR2,CD22,CD274,CD40,CD86,CHEK2,CLEC7A,CREB5,CRYBA1,CTSE,CTSL,CXCL10,CYBB,DDX3X,DIAPH3,DSE,DTX3L,E2F8,EAF2,EIF2AK1,EIF2AK2,EIF2S3,EIF2S3B,ENSG00000288721,ETV7,FCGR2B,FECH,FFAR2,GALNT5,GALNTL6,GBP1,GCH1,GCNT1,GCNT2,H4C1,HELZ2,HESX1,HEXB,HGF,HHEX,HNRNPH3,HSPB…
GO:BP	regulation of developmental process	GO:0050793	FALSE	5.50E-47	46.2593	2457	744	121	78724	ARHGAP44,BCL11A,BCL2L1,BEND6,BHLHE41,BTK,C1QC,C3AR1,CAV1,CCR2,CD40,CD86,CLEC7A,COL4A3,CXCL10,CXCL9,CYBB,DDAH1,EAF2,EIF2AK2,EPB41L3,FAM210B,FCGR2B,FGD4,GCNT2,GNAS,H4C1,HESX1,HEXB,HGF,HHEX,HLA-DRA,HSPB1,IL15,IL2,IL4I1,IL7,IRF7,ISG15,JAK2,KIAA0319,LGALS9,MAP2,MBNL3,MIB1,MSR1,NCKAP1L,NFIB,NLGN1,NRG1,OAS2,PALM2AKAP2,PDLIM5,PHIP,PRLR,PTPRF,RB1,RIN2,S100A10,SASH1,SLITRK4,SMAD1,SOX6,SP100,SPTA1,STAT1,STA…
GO:BP	positive regulation of immune response	GO:0050778	FALSE	2.85E-46	45.5451	760	744	73	78724	AIM2,BANK1,BLNK,BTK,C1QA,C1QC,C3AR1,C5,CASP1,CAV1,CCR2,CD19,CD1C,CD22,CD274,CD40,CD86,CLEC7A,DDX3X,DDX60,DUSP3,EIF2AK2,FCGR2B,FFAR2,FPR3,GBP1,HLA-DMA,HLA-DMB,HLA-DRA,IFI16,IFI35,IFIH1,IL15,IL2,IRAK3,IRF7,JAK2,LACC1,LGALS9,MAP2K6,MS4A1,NAIP,NCKAP1L,OAS1,OAS3,OASL,PARP9,PAWR,PIK3AP1,PLSCR1,RIOK3,RSAD2,SCIMP,SERPING1,SLAMF1,SMPDL3A,TLR10,TLR7,TNFSF13B,TRIM5,WDFY1,ZBP1,AKT1,CD1B,CD247,KLRD1,MAD2L2,NF…
GO:BP	regulation of response to stress	GO:0080134	FALSE	3.22E-46	45.4916	1387	744	93	78724	ADAR,AIM2,AUNIP,BCL2L1,BTK,CALHM6,CASP1,CAV1,CCR2,CD274,CD40,CLEC7A,DDAH1,DDIAS,DDX3X,DDX60,DTX3L,EIF2AK1,EIF2AK2,FAP,FCGR2B,FECH,FFAR2,GBP1,GBP3,GCH1,GNAS,HERC5,HGF,IFI16,IFI35,IFIH1,IL15,IL2,IRAK3,IRF7,ISG15,JAK2,KDM6A,KIAA0319,LACC1,LGALS9,MAP2K6,MAP3K20,NAIP,NT5C2,OAS1,OAS3,OASL,OSMR,PARP14,PARP9,PIK3AP1,PLSCR1,PTPRF,RB1,RICTOR,RIOK3,RSAD2,SCIMP,SERPINB2,SERPING1,SMCHD1,SMPDL3A,SNCA,STAT1,STA…
GO:BP	regulation of nucleobase-containing compound metabolic process	GO:0019219	FALSE	3.28E-46	45.4843	3990	744	152	78724	AICDA,AIM2,APOBEC3A,AUNIP,BAZ2B,BCL11A,BEND6,BHLHE41,BTK,CAV1,CD274,CD40,CD86,CHEK2,CLEC7A,CREB5,CXCL10,DDX3X,DTX3L,E2F8,EAF2,EIF2AK2,ENSG00000288721,ETV7,GCH1,HELZ2,HESX1,HEXB,HGF,HHEX,IFI16,IFI27,IL2,IL31RA,IL4I1,IRAK3,IRF7,IRF9,JAK2,KANK2,KDM6A,LACC1,LGALS9,LMO2,LRRFIP2,MACC1,MRPL12,MXI1,NFIB,NRG1,OAS1,OAS3,PARP14,PARP9,PAWR,PAX5,PHIP,PLPP3,PLSCR1,PNPT1,RB1,RBBP8,S100A10,SAMD4A,SETSIP,SIAH2,SM…
GO:BP	cell development	GO:0048468	FALSE	5.92E-46	45.2278	2876	744	129	78724	ADAR,ADCY6,AICDA,ALAS2,ANOS1,ARHGAP44,BCL11A,BCL2L1,BHLHE41,BLNK,BTK,C1GALT1,C1QA,C1QC,C9ORF72,CCR2,CD19,CD86,CFAP54,CLEC7A,CTSL,DIAPH3,EIF2AK1,EIF2AK2,EPB41L3,FAM151B,FAM210B,FCGR2B,FECH,GLRX5,H4C1,HERC6,HEXB,HHEX,HLA-DRA,HORMAD1,HSD17B4,IFI16,IFNE,IL15,IL2,IL31RA,IL4I1,IL7,INHBB,IRF7,ISG15,JAK2,KIAA0319,LGALS9,MAP2,MS4A1,NCKAP1L,NEXN,NFIB,NLGN1,NRG1,PAX5,PDLIM5,PTPRF,PTPRO,RB1,RSAD2,S100A10,SEM…
GO:BP	positive regulation of immune system process	GO:0002684	FALSE	8.16E-46	45.0884	1099	744	84	78724	AIM2,BANK1,BLNK,BTK,C1QA,C1QC,C3AR1,C5,CASP1,CAV1,CCR2,CD19,CD1C,CD22,CD274,CD40,CD86,CLEC7A,CXCL10,DDX3X,DDX60,DUSP3,EIF2AK2,FCGR2B,FFAR2,FPR3,GBP1,HLA-DMA,HLA-DMB,HLA-DRA,IFI16,IFI35,IFIH1,IL15,IL2,IL4I1,IL7,IRAK3,IRF7,JAK2,LACC1,LGALS9,MAP2K6,MS4A1,NAIP,NCKAP1L,OAS1,OAS3,OASL,PARP9,PAWR,PIK3AP1,PLSCR1,PRLR,RB1,RIOK3,RSAD2,SCIMP,SERPING1,SLAMF1,SMPDL3A,SPTA1,SWAP70,TLR10,TLR7,TNFSF13B,TRIM5,WDF…
GO:BP	regulation of RNA metabolic process	GO:0051252	FALSE	9.79E-45	44.0092	3687	744	144	78724	AICDA,AIM2,APOBEC3A,BAZ2B,BCL11A,BEND6,BHLHE41,BTK,CAV1,CD274,CD40,CD86,CHEK2,CLEC7A,CREB5,CXCL10,DDX3X,DTX3L,E2F8,EAF2,EIF2AK2,ENSG00000288721,ETV7,HELZ2,HESX1,HEXB,HGF,HHEX,IFI16,IFI27,IL2,IL31RA,IL4I1,IRAK3,IRF7,IRF9,JAK2,KANK2,KDM6A,LGALS9,LMO2,LRRFIP2,MACC1,MRPL12,MXI1,NFIB,NRG1,OAS1,OAS3,PARP14,PARP9,PAWR,PAX5,PHIP,PLPP3,PLSCR1,PNPT1,RB1,RBBP8,S100A10,SAMD4A,SETSIP,SIAH2,SMAD1,SMTNL1,SNCA,S…
GO:BP	programmed cell death	GO:0012501	FALSE	1.20E-44	43.9217	1987	744	107	78724	ADAR,ANXA5,BCL2L1,BTK,CASP1,CASP7,CAV1,CD274,CD40,CHEK2,CLEC7A,COL4A3,CRYBA1,CTSL,CTSV,CXCL10,DDIAS,DDX3X,DRAM2,EAF2,EIF2AK2,EMP1,EPB41L3,FAP,FCGR2B,FSTL1,GCH1,HGF,HSPB1,IFI16,IFI27,IFI6,IFIT2,IFIT3,IL2,IL31RA,IL7,INHBB,IRF7,JAK2,KANK2,KDM6A,LGALS9,MAP2K6,MAP3K20,MLKL,MX1,NAIP,NCKAP1L,NRG1,NTSR1,PAWR,PHIP,PKN2,PLSCR1,PRLR,RB1,RICTOR,SERPINB2,SIAH2,SLFN12,SNCA,SP100,STAT1,STRADB,TNFSF10,WNT16,XAF1…
GO:BP	cell death	GO:0008219	FALSE	1.45E-44	43.84	1991	744	107	78724	ADAR,ANXA5,BCL2L1,BTK,CASP1,CASP7,CAV1,CD274,CD40,CHEK2,CLEC7A,COL4A3,CRYBA1,CTSL,CTSV,CXCL10,DDIAS,DDX3X,DRAM2,EAF2,EIF2AK2,EMP1,EPB41L3,FAP,FCGR2B,FSTL1,GCH1,HGF,HSPB1,IFI16,IFI27,IFI6,IFIT2,IFIT3,IL2,IL31RA,IL7,INHBB,IRF7,JAK2,KANK2,KDM6A,LGALS9,MAP2K6,MAP3K20,MLKL,MX1,NAIP,NCKAP1L,NRG1,NTSR1,PAWR,PHIP,PKN2,PLSCR1,PRLR,RB1,RICTOR,SERPINB2,SIAH2,SLFN12,SNCA,SP100,STAT1,STRADB,TNFSF10,WNT16,XAF1…
GO:BP	catabolic process	GO:0009056	FALSE	1.50E-44	43.8247	2639	744	122	78724	AICDA,ALDH1A1,BCL2L1,BLVRA,BTK,C9ORF72,CASP7,CAV1,CHEK2,CRYBA1,CTSL,CTSV,DCAF12,DDAH1,DIAPH3,DRAM2,DTX3L,EIF2AK1,ENTPD2,FAM8A1,FAP,GK,GLYATL2,HERC5,HERC6,HEXB,HGF,HNMT,HSD17B4,HSD17B6,HSPB1,IDH1,IFI16,IFI27,IL4I1,IRAK3,ISG15,KMO,LAMP3,MAOB,MBD4,MIB1,MMP17,NSF,NT5C2,NTSR1,NUB1,OAS2,PLPP3,PNPLA4,PNPT1,PSME2,RUBCNL,SAMD4A,SAT1,SDSL,SIAH2,SLC44A1,SLFN12,SMPDL3A,SNCA,SPTLC2,TENT5A,TENT5C,TMEM150B,TRIM…
GO:BP	animal organ development	GO:0048513	FALSE	3.90E-44	43.4086	3085	744	131	78724	AIM2,BCAR3,BCL2L1,C1GALT1,C1QB,CALB1,CALCRL,CASP7,CAV1,CC2D2A,CCDC39,COL19A1,COL4A3,CRYBA1,CSMD1,CXCL10,DIAPH3,DRAM2,E2F8,EAF2,ETV7,FCGR2B,GCNT1,GCNT2,GNAS,GNB4,HESX1,HGF,HSD17B4,IDH1,IL15,IL7,INHBB,ISG15,JAK2,KANK2,KDM6A,MAOB,MAP2K6,MIB1,MMP17,NASP,NFIB,NRG1,OAS2,ODAD4,PAX5,PDLIM5,PNPT1,PRLR,PTPRO,RASAL2,RB1,SEMA3C,SMAD1,SMCHD1,SMTNL1,SOBP,SOX6,SPTLC2,STAT1,TDRD7,TENT5A,TNFSF10,TNFSF13B,TPPP3,TR…
GO:BP	response to cytokine	GO:0034097	FALSE	1.13E-43	42.9455	947	744	77	78724	AANAT,ADAR,AIM2,BCL2L1,BST2,BTK,CASP1,CAV1,CCR2,CCRL2,CD274,CD40,CXCL10,CXCL9,EIF2AK2,GBP1,GBP3,GCH1,IFI16,IFI27,IFIH1,IFIT1,IFITM3,IFNE,IL15,IL1RN,IL2,IL31RA,IL7,INHBB,IRAK3,IRF7,ISG15,JAK2,KMO,LAMP3,LGALS9,MRC1,MX1,MX2,NAIP,NUB1,OAS1,OAS2,OAS3,OASL,OSMR,PARP14,PARP9,PLSCR1,PNPT1,PRLR,SNCA,SP100,STAT1,STAT2,TNFSF13B,USP18,USP25,VRK2,XAF1,YBX3,ZBP1,AKT1,CCL3L3,CHI3L1,DAPK3,IL2RB,NDUFA13,NKX3-1,PA…
GO:BP	regulation of RNA biosynthetic process	GO:2001141	FALSE	2.05E-43	42.6873	3428	744	137	78724	AICDA,AIM2,APOBEC3A,BAZ2B,BCL11A,BEND6,BHLHE41,BTK,CAV1,CD274,CD40,CD86,CHEK2,CLEC7A,CREB5,CXCL10,DDX3X,DTX3L,E2F8,EAF2,EIF2AK2,ENSG00000288721,ETV7,HELZ2,HESX1,HEXB,HGF,HHEX,IFI16,IFI27,IL2,IL31RA,IL4I1,IRAK3,IRF7,IRF9,JAK2,KANK2,KDM6A,LGALS9,LMO2,LRRFIP2,MACC1,MRPL12,MXI1,NFIB,NRG1,PARP14,PARP9,PAWR,PAX5,PHIP,PLPP3,PLSCR1,RB1,RBBP8,S100A10,SETSIP,SIAH2,SMAD1,SMTNL1,SNCA,SOX6,SP100,SP110,SP140,S…
GO:BP	response to peptide	GO:1901652	FALSE	3.52E-43	42.4531	962	744	77	78724	AANAT,ADAR,AIM2,BCL2L1,BST2,BTK,CASP1,CAV1,CCR2,CCRL2,CD274,CD40,CXCL10,CXCL9,EIF2AK2,GBP1,GBP3,GCH1,IFI16,IFI27,IFIH1,IFIT1,IFITM3,IFNE,IL15,IL1RN,IL2,IL31RA,IL7,INHBB,IRAK3,IRF7,ISG15,JAK2,KMO,LAMP3,LGALS9,MRC1,MX1,MX2,NAIP,NUB1,OAS1,OAS2,OAS3,OASL,OSMR,PARP14,PARP9,PLSCR1,PNPT1,PRLR,SNCA,SP100,STAT1,STAT2,TNFSF13B,USP18,USP25,VRK2,XAF1,YBX3,ZBP1,AKT1,CCL3L3,CHI3L1,DAPK3,IL2RB,NDUFA13,NKX3-1,PA…
GO:BP	gene expression	GO:0010467	FALSE	3.59E-43	42.4446	9224	744	233	78724	AANAT,ACO1,ADAR,AFF1,AICDA,AIM2,APOBEC3A,ATP1B1,BANK1,BAZ2B,BCL11A,BEND6,BHLHE41,BLNK,BST2,BTK,C3AR1,C5,CALHM6,CASP1,CASP7,CAV1,CCR2,CD22,CD274,CD40,CD86,CHEK2,CLEC7A,CREB5,CRYBA1,CTSE,CTSL,CXCL10,CYBB,DDX3X,DIAPH3,DTX3L,E2F8,EAF2,EIF2AK1,EIF2AK2,EIF2S3,EIF2S3B,ENSG00000288721,ETV7,FCGR2B,FECH,FFAR2,GBP1,GCNT2,H4C1,HELZ2,HESX1,HEXB,HGF,HHEX,HNRNPH3,HSPB1,IFI16,IFI27,IFIH1,IL15,IL2,IL31RA,IL4I1,IL…
GO:BP	apoptotic process	GO:0006915	FALSE	1.27E-42	41.8959	1923	744	103	78724	ADAR,ANXA5,BCL2L1,BTK,CASP1,CASP7,CAV1,CD274,CD40,CHEK2,COL4A3,CRYBA1,CTSL,CTSV,CXCL10,DDIAS,DDX3X,DRAM2,EAF2,EIF2AK2,EMP1,EPB41L3,FAP,FCGR2B,FSTL1,GCH1,HGF,HSPB1,IFI16,IFI27,IFI6,IFIT2,IFIT3,IL2,IL31RA,IL7,INHBB,IRF7,JAK2,KANK2,KDM6A,LGALS9,MAP2K6,MAP3K20,MX1,NAIP,NCKAP1L,NRG1,NTSR1,PAWR,PHIP,PKN2,PLSCR1,PRLR,RB1,RICTOR,SERPINB2,SIAH2,SLFN12,SNCA,SP100,STAT1,STRADB,TNFSF10,WNT16,XAF1,XKR9,YBX3,Z…
GO:BP	regulation of defense response	GO:0031347	FALSE	2.87E-42	41.5417	809	744	71	78724	ADAR,AIM2,BTK,CALHM6,CASP1,CAV1,CCR2,CD274,CD40,CLEC7A,DDX3X,DDX60,DTX3L,EIF2AK2,FCGR2B,FFAR2,GBP1,GBP3,GNAS,HERC5,HGF,IFI16,IFI35,IFIH1,IL15,IL2,IRAK3,IRF7,ISG15,JAK2,LACC1,LGALS9,MAP2K6,NAIP,NT5C2,OAS1,OAS3,OASL,OSMR,PARP14,PARP9,PIK3AP1,PLSCR1,RB1,RICTOR,RIOK3,RSAD2,SCIMP,SERPING1,SMPDL3A,SNCA,STAT1,STAT2,TLR10,TLR7,TRIM22,TRIM38,TRIM5,USP18,WDFY1,ZBP1,AKT1,KLRD1,NKG7,NPAS2,NR1D2,PTGES,SH2D1B,…
GO:BP	regulation of intracellular signal transduction	GO:1902531	FALSE	5.10E-42	41.2925	1953	744	103	78724	AIM2,ARHGAP24,ARHGAP44,BANK1,BCAR3,BCL2L1,BST2,BTK,C9ORF72,CASP1,CAV1,CD19,CD22,CD40,CD86,CHEK2,CLEC7A,CRYBA1,DDIAS,DDX3X,DDX60,DUSP3,EIF2AK2,FCGR2B,FGD4,GBP1,GCNT2,HGF,HSPB1,IFI35,IFIT5,IRAK3,JAK2,KANK2,KDM6A,KIAA0319,LGALS9,MAP2K6,MAP3K20,MARCO,MOB3B,NAIP,NCKAP1L,NLGN1,NRG1,OASL,PIK3AP1,PIP5K1B,PLEKHG1,RICTOR,RIOK3,RSAD2,SASH1,SCIMP,SETD9,SLAMF1,SLC38A9,SMPDL3A,STARD13,STAT1,SWAP70,TLR7,TNFSF10…
GO:BP	DNA-templated transcription	GO:0006351	FALSE	9.92E-42	41.0037	3549	744	137	78724	AICDA,AIM2,APOBEC3A,BAZ2B,BCL11A,BEND6,BHLHE41,BTK,CAV1,CD274,CD40,CD86,CHEK2,CLEC7A,CREB5,CXCL10,DDX3X,DTX3L,E2F8,EAF2,EIF2AK2,ENSG00000288721,ETV7,HELZ2,HESX1,HEXB,HGF,HHEX,IFI16,IFI27,IL2,IL31RA,IL4I1,IRAK3,IRF7,IRF9,JAK2,KANK2,KDM6A,LGALS9,LMO2,LRRFIP2,MACC1,MRPL12,MXI1,NFIB,NRG1,PARP14,PARP9,PAWR,PAX5,PHIP,PLPP3,PLSCR1,RB1,RBBP8,S100A10,SETSIP,SIAH2,SMAD1,SMTNL1,SNCA,SOX6,SP100,SP110,SP140,S…
GO:BP	regulation of DNA-templated transcription	GO:0006355	FALSE	1.47E-41	40.8341	3409	744	134	78724	AIM2,BAZ2B,BCL11A,BEND6,BHLHE41,BTK,CAV1,CD274,CD40,CD86,CHEK2,CLEC7A,CREB5,CXCL10,DDX3X,DTX3L,E2F8,EAF2,EIF2AK2,ENSG00000288721,ETV7,HELZ2,HESX1,HEXB,HGF,HHEX,IFI16,IFI27,IL2,IL31RA,IL4I1,IRAK3,IRF7,IRF9,JAK2,KANK2,KDM6A,LGALS9,LMO2,LRRFIP2,MACC1,MRPL12,MXI1,NFIB,NRG1,PARP14,PARP9,PAWR,PAX5,PHIP,PLPP3,PLSCR1,RB1,RBBP8,S100A10,SETSIP,SIAH2,SMAD1,SMTNL1,SNCA,SOX6,SP100,SP110,SP140,STAT1,STAT2,TCF4…
GO:BP	negative regulation of metabolic process	GO:0009892	FALSE	2.48E-41	40.6054	3375	744	133	78724	ACO1,ADAR,AICDA,ALDH1A1,APOBEC3A,AUNIP,BANK1,BCL11A,BCL2L1,BEND6,BHLHE41,BST2,BTK,C9ORF72,CAV1,CD22,CD274,CRYBA1,DDX3X,DTX3L,DUSP3,E2F8,EIF2AK1,EIF2AK2,ETV7,FCGR2B,GBP1,HELZ2,HESX1,HGF,HHEX,HSPB1,IFI16,IFI27,IL15,INHBB,IRAK3,IRF7,ISG15,KANK2,LAMP3,LGALS9,MAP2K6,MAP3K20,MSR1,MXI1,NAV3,NCKAP1L,NFIB,NRG1,OAS1,OAS3,PARP14,PARP9,PAWR,PAX5,PLPP3,PNPT1,PUS10,RB1,RBBP8,SAMD4A,SIAH2,SIGLEC1,SLAMF1,SLC8A3,…
GO:BP	positive regulation of multicellular organismal process	GO:0051240	FALSE	2.02E-40	39.6936	1667	744	94	78724	AIM2,BCL11A,BTK,C3AR1,C5,CASP1,CAV1,CCR2,CD274,CD40,CD86,CLEC7A,CYBB,DDAH1,DDX3X,EIF2AK2,FCGR2B,FFAR2,GCH1,GCNT2,GNAS,HGF,HLA-DMA,HLA-DMB,HLA-DRA,HSPB1,IFI16,IFIH1,IL15,IL2,IL4I1,IL7,INHBB,IRAK3,IRF7,ISG15,JAK2,LACC1,LGALS9,NAIP,NCKAP1L,NLGN1,NRG1,NTSR1,OAS1,OAS2,OAS3,PRLR,RB1,RIOK3,RSAD2,SASH1,SCIMP,SGIP1,SLAMF1,SLITRK4,SMAD1,SMTNL1,SOX6,SPTA1,STAT1,TENT5A,TLR7,TNFSF13B,TRPM4,YBX3,ZBTB20,ACVR2B,…
GO:BP	cellular localization	GO:0051641	FALSE	1.47E-39	38.8315	3661	744	136	78724	ADAR,AP1S2,AP1S3,ARHGAP44,ARL4A,ATP1B1,BCL2L1,BTK,C9ORF72,CALCRL,CAV1,CC2D2A,CCDC39,CCDC68,CCR2,CD19,CFAP54,CLIC2,CXCL10,CXCL9,DDX3X,DIAPH3,DNAJC13,DNM1,DTX3L,EIF2AK1,EPB41L3,EVI5,FCGR2B,FFAR2,GBP1,GNAS,GOLPH3L,GPC4,H4C1,HEXB,HHEX,HPS5,HSPB1,IFI27,IFIT1,IL1RN,INHBB,ISG15,JAK2,KMO,LAMP3,LGALS9,LYST,MAP2,MILR1,MSR1,MX2,NASP,NCKAP1L,NLGN1,NRG1,NSF,NTSR1,ODAD4,PARP9,RB1,RGPD2,RSAD2,RTP4,S100A10,SGIP1…
GO:BP	positive regulation of signaling	GO:0023056	FALSE	2.11E-39	38.6748	1796	744	96	78724	BANK1,BCAR3,BST2,BTK,CALB1,CASP1,CAV1,CCR2,CD180,CD19,CD40,CD86,CLEC7A,CTSL,CTSV,DDX3X,DDX60,DEPDC1B,EIF2AK2,FCGR2B,FFAR2,GCNT2,HGF,HHEX,IFI35,IFIT5,IL7,INHBB,IRF7,JAK2,KIAA0319,KMO,LGALS9,MAP2K6,MAP3K20,MARCO,NAIP,NCKAP1L,NLGN1,NRG1,NSF,OASL,PARP14,PARP9,PHIP,PIK3AP1,PRLR,RICTOR,RSAD2,SASH1,SCIMP,SLAMF1,SLC1A3,SLC38A9,SLC8A3,SNCA,TLR7,TMOD2,TNFSF10,TRIM22,TRIM38,TRIM5,TRIM58,TRPM4,WDFY1,WNT16,ZB…
GO:BP	negative regulation of response to stimulus	GO:0048585	FALSE	2.68E-39	38.5716	1680	744	93	78724	ADAR,AIM2,ARHGAP24,ARHGAP44,AUNIP,BANK1,BCL2L1,BEND6,C5,C9ORF72,CAV1,CCR2,CD22,CD274,CRYBA1,DDAH1,DDIAS,DDX3X,DUSP3,FAP,FCGR2B,GBP1,GNAS,HGF,HHEX,HSPB1,IFI16,IFI35,IFI6,IL1RN,IL2,IL4I1,IL7,IRAK3,ISG15,KANK2,KDM6A,KIAA0319,LGALS9,MAP3K20,NAIP,NCKAP1L,NRG1,NT5C2,OAS1,OAS3,PARP14,PAWR,PHIP,PTPRO,RB1,RIOK3,SERPINB2,SERPING1,SIAH2,SLAMF1,SMCHD1,SMPDL3A,SNCA,STAT1,STAT2,STRADB,TRIM38,USP18,USP25,WNT16,…
GO:BP	regulation of response to biotic stimulus	GO:0002831	FALSE	5.87E-39	38.231	540	744	58	78724	ADAR,AIM2,BTK,CALHM6,CASP1,CAV1,CD180,CD274,CD40,CLEC7A,DDX3X,DDX60,DTX3L,EIF2AK2,FCGR2B,FFAR2,HERC5,IFI16,IFI35,IFIH1,IL15,IL4I1,IRAK3,IRF7,ISG15,LACC1,LGALS9,MAP2K6,NAIP,NT5C2,OAS1,OAS3,OASL,PARP14,PARP9,PIK3AP1,PLSCR1,RIOK3,RSAD2,SASH1,SCIMP,SERPING1,SMPDL3A,STAT1,STAT2,TLR10,TLR7,TRIM22,TRIM38,TRIM5,USP18,WDFY1,ZBP1,AKT1,KLRD1,SH2D1B,TRIM32,TXK
GO:BP	positive regulation of cell communication	GO:0010647	FALSE	1.34E-38	37.8721	1795	744	95	78724	BANK1,BCAR3,BST2,BTK,CALB1,CASP1,CAV1,CCR2,CD180,CD19,CD40,CD86,CLEC7A,CTSL,CTSV,DDX3X,DDX60,DEPDC1B,EIF2AK2,FCGR2B,FFAR2,GCNT2,HGF,HHEX,IFI35,IFIT5,IL7,INHBB,IRF7,JAK2,KIAA0319,KMO,LGALS9,MAP2K6,MAP3K20,MARCO,NAIP,NCKAP1L,NLGN1,NRG1,OASL,PARP14,PARP9,PHIP,PIK3AP1,PRLR,RICTOR,RSAD2,SASH1,SCIMP,SLAMF1,SLC1A3,SLC38A9,SLC8A3,SNCA,TLR7,TMOD2,TNFSF10,TRIM22,TRIM38,TRIM5,TRIM58,TRPM4,WDFY1,WNT16,ZBP1,A…
GO:BP	cell activation	GO:0001775	FALSE	3.71E-38	37.4302	1132	744	77	78724	AICDA,BANK1,BLNK,BST2,BTK,C1QA,CAV1,CCR2,CD151,CD180,CD19,CD1C,CD22,CD274,CD40,CD86,CLEC7A,CTSL,CXCL10,DCAF12,DUSP3,ENTPD2,FCGR2B,FCRL1,FCRL5,GNAS,HHEX,HLA-DMA,HLA-DMB,HLA-DRA,HSPB1,IFI35,IFNE,IL15,IL2,IL31RA,IL4I1,IL7,JAK2,LGALS9,MILR1,MS4A1,NCKAP1L,PAWR,PAX5,PLSCR1,PRLR,RSAD2,SANBR,SLAMF1,SNCA,SPTA1,SWAP70,TNFSF13B,AKT1,ASCL2,CCND3,CD247,CD320,DGKK,DGKQ,DLL1,ERBB2,F2R,KLRD1,KLRF1,MAD2L2,MFNG,MR…
GO:BP	nucleobase-containing compound metabolic process	GO:0006139	FALSE	2.75E-37	36.5605	7992	744	204	78724	ACOT9,ADAR,ADCY6,AICDA,AIM2,APOBEC3A,ATP1B1,AUNIP,BAZ2B,BCL11A,BEND6,BHLHE41,BTK,CAV1,CD274,CD40,CD86,CHEK2,CLEC7A,CMPK2,CREB5,CXCL10,DDX3X,DTX3L,E2F8,EAF2,EIF2AK2,ENSG00000288721,ENTPD2,ETV7,FANCL,GCH1,H4C1,HELZ2,HESX1,HEXB,HGF,HHEX,HNRNPH3,HORMAD1,HSD17B4,IDH1,IFI16,IFI27,IL2,IL31RA,IL4I1,IRAK3,IRF7,IRF9,JAK2,KANK2,KDM6A,KMO,LACC1,LGALS9,LMO2,LRRFIP2,MACC1,MBD4,MBNL3,MRPL12,MXI1,NASP,NDUFV3,NFI…
GO:BP	organelle organization	GO:0006996	FALSE	4.64E-37	36.3331	3594	744	131	78724	AP1S2,AP1S3,ARHGAP44,AUNIP,BCL2L1,BST2,C9ORF72,CAV1,CC2D2A,CCDC39,CCDC68,CCNA1,CEP162,CFAP54,CHEK2,CIP2A,DDX3X,DIAPH3,DNAH8,DNAJC13,DNM1,EPB41L3,FGD4,FRMD3,GAS2L3,GCH1,GOLPH3L,H4C1,HEXB,HGF,HHEX,HORMAD1,HPS5,IFI6,IFIT2,JAK2,KANK2,LYST,MAP2,MAP3K20,NASP,NAV3,NCKAP1L,NCKAP5,NEXN,NFIB,NLGN1,ODAD4,PAWR,PDLIM5,PHIP,PNPT1,RB1,RICTOR,RUBCNL,S100A10,SAMD9,SHOC1,SLAMF1,SLC45A2,SLC9A9,SMC6,SMCHD1,SMTNL1,SN…
GO:BP	response to oxygen-containing compound	GO:1901700	FALSE	5.01E-37	36.3001	1669	744	90	78724	AANAT,ADCY6,AICDA,ALDH1A1,BCAR3,BCL11A,BCL2L1,BTK,CACNA1A,CALCRL,CASP1,CASP7,CAV1,CD180,CD274,CD40,CD86,CLEC7A,CMPK2,COL4A3,CXCL10,CXCL9,CYBB,FAM210B,FCGR2B,FECH,FFAR2,FOLR2,GBP3,GCH1,GCNT1,GNAS,HGF,IL2,INHBB,IRAK3,JAK2,KANK2,KDM6A,KMO,LGALS9,MAOB,MAP2K6,MBD4,MRC1,NASP,PAWR,PHIP,PLSCR4,PNPT1,RASAL2,RB1,SASH1,SCIMP,SLC1A3,SNCA,SP100,STAT1,STAT2,TLR7,TNFSF10,TRIM5,TRPM4,XRN1,ZBTB20,ACVR2B,AKR1C3,AK…
GO:BP	negative regulation of macromolecule metabolic process	GO:0010605	FALSE	1.10E-36	35.9576	3157	744	122	78724	ACO1,ADAR,AICDA,APOBEC3A,AUNIP,BANK1,BCL11A,BEND6,BHLHE41,BST2,BTK,C9ORF72,CAV1,CD22,CD274,CRYBA1,DDX3X,DTX3L,DUSP3,E2F8,EIF2AK1,EIF2AK2,ETV7,FCGR2B,GBP1,HELZ2,HESX1,HGF,HHEX,HSPB1,IFI16,IFI27,INHBB,IRAK3,IRF7,ISG15,KANK2,LAMP3,LGALS9,MAP3K20,MSR1,MXI1,NAV3,NCKAP1L,NFIB,NRG1,OAS1,OAS3,PARP14,PARP9,PAWR,PAX5,PLPP3,PNPT1,PUS10,RB1,RBBP8,SAMD4A,SIAH2,SIGLEC1,SLAMF1,SLC8A3,SMAD1,SMCHD1,SMTNL1,SNCA,SO…
GO:BP	positive regulation of gene expression	GO:0010628	FALSE	4.32E-36	35.3649	1212	744	77	78724	ADAR,AICDA,AIM2,APOBEC3A,BCL11A,BLNK,BTK,C3AR1,C5,CASP1,CAV1,CCR2,CD274,CD40,CD86,CLEC7A,CYBB,DDX3X,EIF2AK2,FCGR2B,FFAR2,HGF,HSPB1,IFI16,IFIH1,IL15,IL2,IL7,IRAK3,IRF7,ISG15,JAK2,KDM6A,LACC1,LAMP3,LGALS9,NAIP,NTSR1,OAS1,OAS2,OAS3,PAWR,PLSCR1,RIOK3,RSAD2,S100A10,SAMD4A,SCIMP,SLAMF1,SMAD1,STAT1,TENT5A,TENT5C,TLR7,WARS1,WNT10A,WNT16,YBX3,ZBTB20,ADTRP,AKT1,ARRDC4,CHI3L1,DGKQ,DLL1,EPHX2,ERBB2,F2R,MAD2L…
GO:BP	activation of immune response	GO:0002253	FALSE	7.61E-36	35.1184	560	744	56	78724	AIM2,BANK1,BLNK,BTK,C1QA,C1QC,C3AR1,C5,CASP1,CAV1,CD19,CD22,CD274,CD40,CLEC7A,DDX3X,DDX60,DUSP3,EIF2AK2,FCGR2B,FFAR2,FPR3,GBP1,IFI16,IFI35,IFIH1,IRAK3,IRF7,LACC1,MAP2K6,MS4A1,NAIP,NCKAP1L,OAS1,OAS3,OASL,PAWR,PIK3AP1,PLSCR1,RIOK3,RSAD2,SCIMP,SERPING1,SMPDL3A,TLR10,TLR7,TRIM5,WDFY1,ZBP1,AKT1,CD247,KLRD1,NFATC2,SKAP1,TRIM32,TXK
GO:BP	leukocyte activation	GO:0045321	FALSE	8.58E-36	35.0666	980	744	70	78724	AICDA,BANK1,BLNK,BST2,BTK,C1QA,CAV1,CCR2,CD151,CD180,CD19,CD1C,CD22,CD274,CD40,CD86,CLEC7A,CTSL,DCAF12,DUSP3,FCGR2B,FCRL1,FCRL5,HHEX,HLA-DMA,HLA-DMB,HLA-DRA,IFI35,IFNE,IL15,IL2,IL31RA,IL4I1,IL7,JAK2,LGALS9,MILR1,MS4A1,NCKAP1L,PAWR,PAX5,PLSCR1,PRLR,RSAD2,SANBR,SLAMF1,SNCA,SPTA1,SWAP70,TNFSF13B,AKT1,ASCL2,CCND3,CD247,CD320,DLL1,ERBB2,KLRD1,KLRF1,MAD2L2,MFNG,MRGPRX2,NFATC2,NKG7,PRF1,PTGDR,SH2D1B,SMA…
GO:BP	immune response-regulating signaling pathway	GO:0002764	FALSE	1.38E-35	34.8608	540	744	55	78724	AIM2,BANK1,BLNK,BTK,BTLA,C3AR1,CASP1,CAV1,CD19,CD22,CD274,CD40,CLEC7A,DDX3X,DDX60,DUSP3,EIF2AK2,FCGR2B,FFAR2,FPR3,GBP1,IFI35,IFIH1,IRAK3,IRF7,LACC1,MAP2K6,MS4A1,NAIP,NCKAP1L,OAS1,OAS3,OASL,PAWR,PIK3AP1,PLSCR1,RIOK3,RSAD2,SCIMP,SMPDL3A,TLR10,TLR7,WDFY1,AKT1,CD247,KIR2DL1,KIR3DL1,KIR3DL2,KLRD1,LAIR2,MAPK9,NFATC2,SKAP1,TRIM32,TXK
GO:BP	positive regulation of signal transduction	GO:0009967	FALSE	1.39E-35	34.858	1578	744	86	78724	BANK1,BCAR3,BST2,BTK,CASP1,CAV1,CD180,CD19,CD40,CD86,CLEC7A,CTSL,CTSV,DDX3X,DDX60,DEPDC1B,EIF2AK2,FCGR2B,GCNT2,HGF,HHEX,IFI35,IFIT5,IL7,INHBB,IRF7,JAK2,KIAA0319,LGALS9,MAP2K6,MAP3K20,MARCO,NAIP,NCKAP1L,NLGN1,NRG1,OASL,PARP14,PARP9,PHIP,PIK3AP1,PRLR,RICTOR,RSAD2,SASH1,SCIMP,SLAMF1,SLC38A9,TLR7,TMOD2,TNFSF10,TRIM22,TRIM38,TRIM5,TRIM58,TRPM4,WDFY1,WNT16,ZBP1,ACVR2B,AKAP5,AKR1C3,AKT1,AXIN1,CHI3L1,CYF…
GO:BP	regulation of cytokine production	GO:0001817	FALSE	4.88E-35	34.3115	781	744	63	78724	AIM2,BANK1,BST2,BTK,C3AR1,C5,CALHM6,CASP1,CCR2,CD274,CD40,CD86,CLEC7A,CRYBA1,CYBB,DDX3X,EIF2AK2,FCGR2B,FFAR2,GBP1,HGF,HSPB1,IFI16,IFIH1,IL15,IL2,IL7,INHBB,IRAK3,IRF7,ISG15,JAK2,LACC1,LGALS9,NAIP,NAV3,NCKAP1L,OAS1,OAS2,OAS3,RIOK3,RSAD2,SCIMP,SIGLEC1,SLAMF1,STAT1,TLR7,TRIM38,TRPM4,XAF1,ZBTB20,ARRDC4,CHI3L1,DLL1,F2R,MAPK9,SMAD7,SPON2,TBX21,TRIM32,TXK,ZBTB45,ZFPM1
GO:BP	homeostatic process	GO:0042592	FALSE	6.92E-35	34.1597	1736	744	89	78724	ACO1,ADAR,ADCY6,AIM2,ALAS2,ALDH1A1,ATP1B1,BTK,CALB1,CAV1,CCR2,CD19,CD40,CLIC2,CSMD1,CXCL10,CXCL9,DDX3X,DIAPH3,DMXL1,DMXL2,DRAM2,EIF2AK1,FAM210B,FECH,FFAR2,FGGY,FSTL1,GCNT2,GLRX5,GNAS,HEXB,IL15,IL2,IL31RA,IL7,ISG15,JAK2,LACC1,LGALS9,MAP2K6,NCKAP1L,NFIB,NTSR1,OAS1,PNPLA4,PRLR,RASAL2,RB1,SGIP1,SLC1A3,SLC45A2,SLC8A3,SLC9A9,SMAD1,SNCA,SPTA1,STAT1,TLCD4,TNFSF13B,TRIM58,TRPM4,TSPO2,ZBTB20,ZFX,ACADVL,ACV…
GO:BP	cytokine production	GO:0001816	FALSE	7.66E-35	34.1159	787	744	63	78724	AIM2,BANK1,BST2,BTK,C3AR1,C5,CALHM6,CASP1,CCR2,CD274,CD40,CD86,CLEC7A,CRYBA1,CYBB,DDX3X,EIF2AK2,FCGR2B,FFAR2,GBP1,HGF,HSPB1,IFI16,IFIH1,IL15,IL2,IL7,INHBB,IRAK3,IRF7,ISG15,JAK2,LACC1,LGALS9,NAIP,NAV3,NCKAP1L,OAS1,OAS2,OAS3,RIOK3,RSAD2,SCIMP,SIGLEC1,SLAMF1,STAT1,TLR7,TRIM38,TRPM4,XAF1,ZBTB20,ARRDC4,CHI3L1,DLL1,F2R,MAPK9,SMAD7,SPON2,TBX21,TRIM32,TXK,ZBTB45,ZFPM1
GO:BP	positive regulation of response to external stimulus	GO:0032103	FALSE	9.33E-35	34.0301	642	744	58	78724	AIM2,BTK,C3AR1,CASP1,CAV1,CCR2,CD180,CD274,CD40,CLEC7A,CXCL10,DDX3X,DDX60,EIF2AK2,FFAR2,GBP1,GBP3,HSPB1,IFI16,IFI35,IFIH1,IL15,IL2,IRAK3,IRF7,LACC1,LGALS9,MAP2K6,NAIP,NCKAP1L,OAS1,OAS3,OASL,OSMR,PARP9,PIK3AP1,PLSCR1,RIOK3,RSAD2,SASH1,SCIMP,SLAMF1,SMPDL3A,SNCA,SWAP70,TLR10,TLR7,TRIM5,WDFY1,ZBP1,AKT1,KLRD1,NKG7,PDGFD,SH2D1B,TRADD,TRIM32,TXK
GO:BP	cellular response to cytokine stimulus	GO:0071345	FALSE	1.05E-34	33.9769	854	744	65	78724	ADAR,AIM2,BTK,CASP1,CAV1,CCR2,CCRL2,CD40,CXCL10,CXCL9,GBP1,GBP3,IFI16,IFI27,IFIH1,IFIT1,IFITM3,IFNE,IL15,IL1RN,IL2,IL31RA,IL7,INHBB,IRAK3,IRF7,ISG15,JAK2,KMO,LGALS9,MRC1,MX1,NAIP,OAS1,OAS2,OAS3,OASL,OSMR,PARP14,PARP9,PNPT1,PRLR,SP100,STAT1,STAT2,TNFSF13B,USP18,USP25,VRK2,YBX3,ZBP1,AKT1,CCL3L3,CHI3L1,DAPK3,IL2RB,NDUFA13,NKX3-1,PARP16,PTP4A3,SMAD7,SMPD3,TRADD,TRIM32,TXK
GO:BP	inflammatory response	GO:0006954	FALSE	1.85E-34	33.7333	862	744	65	78724	AIM2,BLNK,BTK,C1QA,C3AR1,C5,CASP1,CCR2,CCRL2,CD180,CD40,CLEC7A,CXCL10,CXCL9,CYBB,DDX3X,EIF2AK1,EIF2AK2,FCGR2B,FFAR2,FOLR2,FPR3,GBP1,GBP3,GNAS,HGF,IFI16,IFI27,IFI35,IL15,IL1RN,IL2,IL31RA,JAK2,LACC1,LGALS9,LYZ,MAP3K20,NAIP,OSMR,PIK3AP1,PLSCR1,RB1,RICTOR,SCN9A,SIGLEC1,SLAMF1,SMAD1,SNCA,TLR10,TLR7,USP18,ZBP1,AKT1,CCL3L3,CDO1,CHI3L1,F2R,GZMB,MAPK9,NKG7,NR1D2,PTGDR,PTGES,TRADD
GO:BP	regulation of protein metabolic process	GO:0051246	FALSE	3.01E-34	33.5221	1855	744	91	78724	ACO1,ADAR,BANK1,BCAR3,C9ORF72,CAV1,CD40,CD86,CHEK2,DDX3X,DTX3L,DUSP3,EIF2AK1,EIF2AK2,FECH,HERC5,HGF,HHEX,HSPB1,IL15,IL2,IL31RA,IL7,INHBB,IRAK3,ISG15,JAK2,LAMP3,MAP3K20,NRG1,NSF,NSUN3,NUB1,PARP14,PARP9,PAWR,PHIP,PLPP3,PRLR,PSME2,RASAL2,RB1,RICTOR,S100A10,SAMD4A,SASH1,SIAH2,SLC8A3,SNCA,STAT2,STRADB,TLR7,TNFSF15,USP25,WARS1,XRN1,YBX3,ADTRP,AKT1,ARRDC4,AXIN1,CCND3,CDK5R1,CHI3L1,CYFIP2,DAPK3,DDA1,DGKQ…
GO:BP	negative regulation of biosynthetic process	GO:0009890	FALSE	8.09E-34	33.0923	2813	744	111	78724	ACO1,ADAR,AICDA,APOBEC3A,BANK1,BCL11A,BEND6,BHLHE41,BST2,BTK,CAV1,CD22,CD274,CRYBA1,DDX3X,E2F8,EIF2AK1,EIF2AK2,ETV7,FCGR2B,GBP1,HELZ2,HESX1,HGF,HHEX,IFI16,IFI27,INHBB,IRAK3,IRF7,KANK2,LGALS9,MAP3K20,MSR1,MXI1,NAV3,NCKAP1L,NFIB,NRG1,OAS1,OAS3,PARP14,PARP9,PAWR,PAX5,PNPT1,PUS10,RB1,RBBP8,SAMD4A,SIAH2,SIGLEC1,SLAMF1,SMAD1,SMCHD1,SMTNL1,SNCA,SOX6,SP100,STAT1,TDRD1,TDRD7,TENT5A,TENT5C,TFEC,TRIM22,TRPS…
GO:BP	cell population proliferation	GO:0008283	FALSE	9.62E-34	33.0169	2015	744	94	78724	BCAR3,BCL2L1,BST2,BTK,CALCRL,CAV1,CCR2,CD151,CD180,CD19,CD22,CD274,CD40,CD86,CLEC7A,COL4A3,CXCL10,CXCL9,DDAH1,DRAM2,E2F8,EAF2,EIF2AK1,EIF2AK2,FANCL,FAP,FCGR2B,FOLR2,GCNT2,HGF,HHEX,HLA-DMB,IFI35,IFIT3,IFNE,IL15,IL2,IL31RA,IL4I1,IL7,JAK2,KANK2,LGALS9,MS4A1,NCKAP1L,NFIB,NRG1,OSMR,PAWR,PHIP,PRLR,RB1,RICTOR,SLAMF1,SMAD1,SPTA1,STAT1,STAT2,TNFSF13B,TRPM4,WARS1,WNT16,AKR1C3,AKT1,ASCL2,CCL3L3,CCND3,CD320,…
GO:BP	regulation of localization	GO:0032879	FALSE	1.66E-33	32.7786	2029	744	94	78724	ARHGAP44,ATP1B1,BCL2L1,BTK,C9ORF72,CAV1,CCR2,CD151,CD19,CD22,CLEC7A,CLIC2,CXCL10,CXCL9,DENND5B,DNAJC13,DTX3L,FCGR2B,FFAR2,GBP1,GNAS,GOLPH3L,GPC4,IFI27,IL15,INHBB,JAK2,KMO,LGALS9,MAOB,MAP2,MAP2K6,MIB1,MS4A1,MSR1,MX2,NCKAP1L,NLGN1,NRG1,NSF,NTSR1,OAS2,PARP9,PLSCR1,RSAD2,S100A10,SESTD1,SGIP1,SLAMF1,SNCA,SP100,SWAP70,TRIM22,TRIM38,TRIM5,TRIM58,TRPM4,ZNF205,ADTRP,AKAP5,AKT1,AMIGO1,BAG3,CD247,CDK5R1,DGK…
GO:BP	tissue development	GO:0009888	FALSE	1.87E-33	32.7278	2032	744	94	78724	ARHGAP24,BTK,C1GALT1,CALB1,CAV1,CC2D2A,CCDC39,CD151,COL19A1,CSMD1,CXCL10,DHRS9,DRAM2,E2F8,EMP1,FSTL1,GCNT1,GCNT2,GNAS,HESX1,HGF,HNRNPH3,HSD17B4,IL31RA,ISG15,JAK2,KANK2,KDM6A,MIB1,NFIB,NRG1,PAX5,PDLIM5,PRLR,PTPRO,RASAL2,RB1,SEMA3C,SETSIP,SMAD1,SOX6,SPTLC2,STARD13,STAT1,TDRD7,TENT5A,TPPP3,TRPM4,TRPS1,TXLNG,WNT10A,WNT16,YBX3,ZFAND5,ACADVL,ACVR2B,AJAP1,AKR1C3,AKT1,ASCL2,AXIN1,BFSP1,BNC2,CBS,CHI3L1,CO…
GO:BP	negative regulation of macromolecule biosynthetic process	GO:0010558	FALSE	2.21E-33	32.6549	2745	744	109	78724	ACO1,ADAR,AICDA,APOBEC3A,BANK1,BCL11A,BEND6,BHLHE41,BST2,BTK,CAV1,CD22,CD274,CRYBA1,DDX3X,E2F8,EIF2AK1,EIF2AK2,ETV7,FCGR2B,GBP1,HELZ2,HESX1,HGF,HHEX,IFI16,IFI27,INHBB,IRAK3,IRF7,KANK2,LGALS9,MAP3K20,MSR1,MXI1,NAV3,NCKAP1L,NFIB,NRG1,OAS1,OAS3,PARP14,PARP9,PAWR,PAX5,PNPT1,PUS10,RB1,RBBP8,SAMD4A,SIAH2,SIGLEC1,SLAMF1,SMAD1,SMCHD1,SMTNL1,SNCA,SOX6,SP100,STAT1,TDRD1,TDRD7,TENT5A,TENT5C,TFEC,TRIM22,TRPS…
GO:BP	cell adhesion	GO:0007155	FALSE	2.87E-33	32.5423	1530	744	82	78724	ANOS1,ATP1B1,BCAM,CAV1,CCR2,CD151,CD22,CD274,CD86,COL19A1,COL4A3,DUSP3,FAP,FOLR2,FOLR3,GBP1,GCNT1,GCNT2,GNAS,GPC4,HLA-DMA,HLA-DMB,HLA-DRA,HSPB1,IL15,IL1RN,IL2,IL4I1,IL7,JAK2,LGALS9,NCKAP1L,NEXN,NLGN1,NRG1,PAWR,PDLIM5,PKN2,PLPP3,PRLR,PTPRF,PTPRO,RIN2,S100A10,SIGLEC1,SIGLEC6,SLAMF1,SPTA1,SSPN,SWAP70,TNFSF13B,ADTRP,AJAP1,AKT1,AMIGO1,ASCL2,CCL28,CDK5R1,COL13A1,COL18A1,CYFIP2,DAB1,DAPK3,DLL1,ERBB2,FAT…
GO:BP	macromolecule localization	GO:0033036	FALSE	4.63E-33	32.3349	3228	744	118	78724	ABCG2,ADAR,AP1S2,AP1S3,APOL6,ARHGAP44,ARL4A,ATP10D,ATP1B1,BCL2L1,C9ORF72,CALCRL,CAV1,CC2D2A,CCDC39,CCDC68,DDX3X,DENND5B,DNAJC13,DTX3L,EIF2AK1,EPB41L3,FFAR2,GBP1,GNAS,GOLPH3L,GPC4,H4C1,HHEX,HSPB1,IFI27,IFIT1,IL1RN,INHBB,ISG15,JAK2,LAMP3,LYST,MAP2,MAP2K6,MSR1,MX2,NASP,NLGN1,NME4,NSF,NTSR1,ODAD4,OSBPL10,OSBPL1A,PARP9,PLSCR1,PLSCR4,PNPT1,RB1,RGPD2,RSAD2,RTP4,S100A10,SNCA,SNX22,SP100,STRADB,SWAP70,TRA…
GO:BP	immune effector process	GO:0002252	FALSE	1.22E-32	31.9134	732	744	59	78724	AICDA,BST2,BTK,C1QA,C1QC,C5,CALHM6,CCR2,CD180,CD19,CD1C,CD22,CD274,CD40,CD86,CLEC7A,DDX60,FCGR2B,FFAR2,HLA-DMB,HLA-DRA,IFI35,IFNE,IL2,IL4I1,IRAK3,IRF7,LACC1,LGALS9,LYST,MILR1,NCKAP1L,RSAD2,SANBR,SCIMP,SERPING1,SLAMF1,SWAP70,TLR7,TRPM4,ASCL2,CD1B,DLL1,GZMB,GZMM,IL2RB,KIR3DL1,KLRD1,MAD2L2,MFNG,MRGPRX2,NKG7,PRF1,PTGDR,SH2D1B,SMAD7,SPON2,TBX21,ZFPM1
GO:BP	regulation of cellular component organization	GO:0051128	FALSE	2.98E-32	31.5262	2433	744	101	78724	ADCY6,ARHGAP24,ARHGAP44,BCL11A,BCL2L1,BST2,BTK,C9ORF72,CACNA2D3,CASP7,CAV1,CD151,CD22,CHEK2,CLEC7A,CXCL10,CXCL9,DDX3X,DIAPH3,DOCK4,DUSP3,EAF2,EIF2AK2,FAP,FCGR2B,GCH1,GPC4,HGF,HORMAD1,IL15,IL2,IRAK3,ISG15,KANK2,KIAA0319,MAP2,MAP3K20,MIB1,NAV3,NCKAP1L,NEXN,NLGN1,NRG1,PDLIM5,PHIP,PLSCR1,PTPRF,PTPRO,RB1,RICTOR,RIOK3,S100A10,SGIP1,SLAMF1,SLITRK4,SMC6,SNCA,SPTA1,STAT2,SWAP70,TMOD2,TNFSF10,TPPP3,TRIM58,…
GO:BP	lymphocyte activation	GO:0046649	FALSE	4.92E-32	31.3084	814	744	61	78724	AICDA,BANK1,BLNK,BST2,BTK,CAV1,CCR2,CD151,CD180,CD19,CD1C,CD22,CD274,CD40,CD86,CLEC7A,CTSL,DCAF12,DUSP3,FCGR2B,FCRL1,FCRL5,HHEX,HLA-DMA,HLA-DMB,HLA-DRA,IFNE,IL15,IL2,IL4I1,IL7,JAK2,LGALS9,MS4A1,NCKAP1L,PAWR,PAX5,PRLR,RSAD2,SANBR,SLAMF1,SPTA1,SWAP70,TNFSF13B,AKT1,ASCL2,CCND3,CD247,CD320,DLL1,ERBB2,KLRD1,KLRF1,MAD2L2,MFNG,NFATC2,NKG7,PRF1,SMAD7,TBX21,ZFPM1
GO:BP	nervous system development	GO:0007399	FALSE	6.83E-32	31.1657	2604	744	104	78724	ADCY6,AIM2,ANOS1,ARHGAP44,BAHCC1,BCL11A,BEND6,BHLHE41,C1QA,C9ORF72,CC2D2A,CCDC39,CCR2,DIAPH3,DOCK4,EPB41L3,FAM151B,FCGR2B,GNB4,GPC4,HESX1,HEXB,IL2,INHBB,JAK2,KDM6A,KIAA0319,MAMDC2,MAOB,MAP2,MIB1,NAIP,NAV3,NCKAP1L,NEXN,NFIB,NLGN1,NRG1,ODAD4,PAX5,PDLIM5,PLPP3,PTPRF,PTPRO,RB1,S100A10,SEMA3C,SLC1A3,SLC8A3,SLITRK4,SMAD1,SNCA,SOX6,TCF4,TMOD2,TRAK2,UGT8,WNT10A,WNT16,AKT1,AMIGO1,APBA2,ARHGEF28,ASCL2,BTBD…
GO:BP	phosphorylation	GO:0016310	FALSE	7.56E-32	31.1212	1320	744	75	78724	ADAR,BANK1,BCAR3,BTK,C9ORF72,CAV1,CD40,CDK14,CHEK2,DDX3X,DUSP3,EIF2AK1,EIF2AK2,FECH,FGGY,HERC5,HGF,HHEX,HSPB1,IL15,IL2,IL31RA,IL7,IRAK3,JAK2,MAP2K6,MAP3K20,MLKL,NCKAP1L,NRG1,PARP14,PARP9,PHIP,PKN2,PLPP3,PRLR,RB1,RICTOR,RIOK3,RPS6KC1,SASH1,SLC8A3,SNCA,STAT2,STRADB,TLR7,TNFSF15,VRK2,WARS1,ACVR2B,ADTRP,AKT1,AXIN1,CAMKK1,CCND3,CDK5R1,CHI3L1,DAPK3,DGKK,DGKQ,EEF2K,ERBB2,LDB1,MAD2L2,MAPK9,NKX3-1,PDGFD,P…
GO:BP	viral process	GO:0016032	FALSE	8.08E-32	31.0925	423	744	47	78724	ADAR,AICDA,APOBEC3A,BST2,CAV1,CD86,CHD1,CTSL,DDX3X,EIF2AK2,GYPA,IFI16,IFI27,IFIH1,IFIT1,IFIT5,IFITM3,IRF7,ISG15,LAMP3,LGALS9,MRC1,MX1,OAS1,OAS2,OAS3,OASL,PARP9,PKN2,PLSCR1,RSAD2,SIGLEC1,SLAMF1,SMC6,SP100,STAT1,TRIM22,TRIM38,TRIM5,TRIM58,APOBEC3H,MGAT4A,NCAM1,NECTIN1,PARP16,TMEM250,TRIM32
GO:BP	regulation of innate immune response	GO:0045088	FALSE	9.36E-32	31.0287	449	744	48	78724	ADAR,AIM2,BTK,CALHM6,CASP1,CAV1,CD274,CD40,CLEC7A,DDX3X,DDX60,EIF2AK2,FCGR2B,FFAR2,IFI16,IFI35,IFIH1,IRAK3,IRF7,ISG15,LACC1,LGALS9,MAP2K6,NAIP,OAS1,OAS3,OASL,PARP14,PARP9,PIK3AP1,PLSCR1,RIOK3,RSAD2,SCIMP,SERPING1,SMPDL3A,STAT2,TLR10,TLR7,TRIM5,USP18,WDFY1,ZBP1,AKT1,KLRD1,SH2D1B,TRIM32,TXK
GO:BP	immune response-activating signaling pathway	GO:0002757	FALSE	6.45E-31	30.1904	494	744	49	78724	AIM2,BANK1,BLNK,BTK,C3AR1,CASP1,CAV1,CD19,CD22,CD274,CD40,CLEC7A,DDX3X,DDX60,DUSP3,EIF2AK2,FCGR2B,FFAR2,FPR3,GBP1,IFI35,IFIH1,IRAK3,IRF7,LACC1,MAP2K6,MS4A1,NAIP,NCKAP1L,OAS1,OAS3,OASL,PAWR,PIK3AP1,PLSCR1,RIOK3,RSAD2,SCIMP,SMPDL3A,TLR10,TLR7,WDFY1,AKT1,CD247,KLRD1,NFATC2,SKAP1,TRIM32,TXK
GO:BP	regulation of cell differentiation	GO:0045595	FALSE	9.33E-31	30.03	1576	744	80	78724	BCL11A,BEND6,BHLHE41,BTK,C1QC,CAV1,CCR2,CD86,CLEC7A,CXCL10,CXCL9,EIF2AK2,FAM210B,FCGR2B,GCNT2,H4C1,HGF,HLA-DRA,IL15,IL2,IL4I1,IL7,IRF7,ISG15,JAK2,KIAA0319,LGALS9,MAP2,MBNL3,MIB1,MSR1,NCKAP1L,NLGN1,NRG1,PRLR,RB1,RIN2,S100A10,SMAD1,SOX6,STAT1,TCF4,TENT5A,TENT5C,TRIM58,TRPM4,TRPS1,ACVR2B,AJAP1,AKT1,AMIGO1,ASCL2,AXIN1,CDK5R1,DAB1,DLL1,EEF2K,ERBB2,FAT4,LBH,LDB1,MAD2L2,MAFF,MAPK9,METRN,MEX3C,NFATC2,NR1…
GO:BP	positive regulation of defense response	GO:0031349	FALSE	2.00E-30	29.6989	506	744	49	78724	AIM2,BTK,CASP1,CAV1,CCR2,CD274,CD40,CLEC7A,DDX3X,DDX60,EIF2AK2,FFAR2,GBP1,GBP3,IFI16,IFI35,IFIH1,IL15,IL2,IRAK3,IRF7,LACC1,MAP2K6,NAIP,OAS1,OAS3,OASL,OSMR,PARP9,PIK3AP1,PLSCR1,RIOK3,RSAD2,SCIMP,SMPDL3A,SNCA,TLR10,TLR7,TRIM5,WDFY1,ZBP1,AKT1,KLRD1,NKG7,NPAS2,SH2D1B,TRADD,TRIM32,TXK
GO:BP	positive regulation of cytokine production	GO:0001819	FALSE	7.91E-30	29.1017	494	744	48	78724	AIM2,BTK,C3AR1,C5,CASP1,CCR2,CD274,CD40,CD86,CLEC7A,CYBB,DDX3X,EIF2AK2,FCGR2B,FFAR2,HGF,HSPB1,IFI16,IFIH1,IL15,IL2,IL7,IRAK3,IRF7,ISG15,JAK2,LACC1,LGALS9,NAIP,OAS1,OAS2,OAS3,RIOK3,RSAD2,SCIMP,SLAMF1,STAT1,TLR7,ZBTB20,ARRDC4,CHI3L1,F2R,MAPK9,SPON2,TBX21,TRIM32,TXK,ZFPM1
GO:BP	regulation of programmed cell death	GO:0043067	FALSE	1.05E-29	28.978	1506	744	77	78724	ADAR,ANXA5,BCL2L1,BTK,CASP1,CASP7,CAV1,CD274,CD40,CLEC7A,CRYBA1,CTSL,CTSV,CXCL10,DDIAS,DDX3X,EIF2AK2,FAP,FCGR2B,FSTL1,GCH1,HGF,HSPB1,IFI6,IFIT2,IFIT3,IL2,IL31RA,IL7,INHBB,IRF7,JAK2,KANK2,KDM6A,LGALS9,MAP2K6,MAP3K20,NAIP,NCKAP1L,NRG1,NTSR1,PAWR,PHIP,PRLR,RB1,RICTOR,SERPINB2,SIAH2,SNCA,SP100,STAT1,STRADB,TNFSF10,WNT16,YBX3,ZBP1,AKR1C3,AKT1,BAG3,CBS,CDK5R1,DAPK3,DLL1,EEF2K,ERBB2,F2R,IL2RB,MAPK9,NDUF…
GO:BP	protein phosphorylation	GO:0006468	FALSE	1.18E-29	28.9285	1227	744	70	78724	ADAR,BANK1,BCAR3,BTK,C9ORF72,CAV1,CD40,CDK14,CHEK2,DDX3X,DUSP3,EIF2AK1,EIF2AK2,FECH,HERC5,HGF,HHEX,HSPB1,IL15,IL2,IL31RA,IL7,IRAK3,JAK2,MAP2K6,MAP3K20,MLKL,NRG1,PARP14,PARP9,PHIP,PKN2,PLPP3,PRLR,RB1,RICTOR,RIOK3,RPS6KC1,SASH1,SLC8A3,SNCA,STAT2,STRADB,TLR7,TNFSF15,VRK2,WARS1,ACVR2B,ADTRP,AKT1,AXIN1,CAMKK1,CCND3,CDK5R1,CHI3L1,DAPK3,DGKQ,EEF2K,ERBB2,MAD2L2,MAPK9,NKX3-1,PDGFD,PLK3,PRR5L,SBK1,SMAD7,SM…
GO:BP	regulation of multicellular organismal development	GO:2000026	FALSE	5.24E-29	28.2807	1418	744	74	78724	BCL11A,BHLHE41,BTK,C1QC,C3AR1,CAV1,CCR2,CD40,CD86,COL4A3,CXCL10,CYBB,DDAH1,FAM210B,FCGR2B,H4C1,HESX1,HHEX,HLA-DRA,HSPB1,IL15,IL2,IL4I1,IL7,IRF7,ISG15,KIAA0319,LGALS9,MAP2,NCKAP1L,NLGN1,NRG1,OAS2,PRLR,RB1,S100A10,SASH1,SLITRK4,SMAD1,SOX6,SP100,STAT1,TENT5A,TRPM4,TRPS1,TXLNG,WARS1,ACVR2B,AJAP1,AKT1,AMIGO1,ASCL2,CHI3L1,CLIC3,DAB1,DLL1,EEF2K,ERBB2,FAT4,GDF9,LDB1,MAFF,METRN,PDE3B,PER2,PHLDB2,PRXL2A,SM…
GO:BP	nucleic acid metabolic process	GO:0090304	FALSE	1.15E-28	27.9395	7434	744	179	78724	ADAR,AICDA,AIM2,APOBEC3A,AUNIP,BAZ2B,BCL11A,BEND6,BHLHE41,BTK,CAV1,CD274,CD40,CD86,CHEK2,CLEC7A,CREB5,CXCL10,DDX3X,DTX3L,E2F8,EAF2,EIF2AK2,ENSG00000288721,ETV7,FANCL,GCH1,H4C1,HELZ2,HESX1,HEXB,HGF,HHEX,HNRNPH3,HORMAD1,IFI16,IFI27,IL2,IL31RA,IL4I1,IRAK3,IRF7,IRF9,JAK2,KANK2,KDM6A,LGALS9,LMO2,LRRFIP2,MACC1,MBD4,MBNL3,MRPL12,MXI1,NASP,NFIB,NRG1,NSUN3,OAS1,OAS2,OAS3,PARP14,PARP9,PAWR,PAX5,PHIP,PLPP3,…
GO:BP	negative regulation of multicellular organismal process	GO:0051241	FALSE	1.58E-28	27.8014	1087	744	65	78724	ALDH1A1,ANXA5,BANK1,BCL11A,BST2,BTK,C1QC,CCR2,CD274,COL4A3,CRYBA1,CXCL10,DOCK4,DUSP3,EAF2,FAP,FCGR2B,GBP1,GNAS,HGF,HHEX,IL15,IL2,IL31RA,IL4I1,INHBB,IRAK3,KIAA0319,LGALS9,MAP2,MAP2K6,MILR1,NAV3,NCKAP1L,NFIB,OAS1,OAS3,PAWR,PTPRO,RB1,SERPINB2,SERPING1,SIGLEC1,SLAMF1,SOX6,STAT1,TRPM4,XAF1,YBX3,ACVR2B,ADTRP,ASCL2,DAB1,DLL1,ERBB2,F2R,MAD2L2,NKX3-1,PDE3B,PTGDR2,SMAD7,SPRED3,TACR2,TBX21,ZFPM1
GO:BP	cell motility	GO:0048870	FALSE	1.90E-28	27.7214	1793	744	82	78724	ARHGAP24,BST2,C3AR1,C5,CAV1,CCDC39,CCR2,CCRL2,CD151,CD274,CD40,CFAP54,CLEC7A,CXCL10,CXCL9,DEPDC1B,DNAH8,DOCK4,DUSP3,FAP,FFAR2,FSTL1,GCNT1,GCNT2,GPC4,HEXB,HGF,HSPB1,JAK2,KANK2,KIAA0319,LGALS9,LYST,NAV3,NCKAP1L,NEXN,PARP9,PKN2,PLPP3,PTPRF,PTPRO,RIN2,SASH1,SDC3,SEMA3C,SLAMF1,SP100,STARD13,STRBP,SWAP70,TRPM4,TTC21A,ZFAND5,ADTRP,AKT1,ASCL2,CCL28,CCL3L3,CDK5R1,DAB1,DAPK3,DDIT4,F2R,LDB1,LGR6,NDN,NFATC2,…
GO:BP	cell migration	GO:0016477	FALSE	2.15E-28	27.6669	1534	744	76	78724	ARHGAP24,BST2,C3AR1,C5,CAV1,CCR2,CCRL2,CD151,CD274,CD40,CLEC7A,CXCL10,CXCL9,DEPDC1B,DOCK4,DUSP3,FAP,FFAR2,FSTL1,GCNT1,GCNT2,GPC4,HEXB,HGF,HSPB1,JAK2,KANK2,KIAA0319,LGALS9,LYST,NAV3,NCKAP1L,NEXN,PARP9,PKN2,PLPP3,PTPRF,PTPRO,RIN2,SASH1,SDC3,SEMA3C,SLAMF1,SP100,STARD13,SWAP70,TRPM4,ZFAND5,ADTRP,AKT1,ASCL2,CCL28,CCL3L3,CDK5R1,DAB1,DAPK3,DDIT4,F2R,LDB1,LGR6,NDN,NFATC2,NRCAM,PARD6B,PDGFD,PHLDB2,PRR5L,P…
GO:BP	regulation of apoptotic process	GO:0042981	FALSE	3.66E-28	27.4366	1462	744	74	78724	ADAR,ANXA5,BCL2L1,BTK,CASP1,CASP7,CAV1,CD274,CD40,CRYBA1,CTSL,CTSV,CXCL10,DDIAS,DDX3X,EIF2AK2,FAP,FCGR2B,FSTL1,GCH1,HGF,HSPB1,IFI6,IFIT2,IFIT3,IL2,IL31RA,IL7,INHBB,IRF7,JAK2,KDM6A,LGALS9,MAP2K6,MAP3K20,NAIP,NCKAP1L,NRG1,NTSR1,PAWR,PHIP,PRLR,RB1,RICTOR,SERPINB2,SIAH2,SNCA,SP100,STAT1,STRADB,TNFSF10,WNT16,YBX3,ZBP1,AKR1C3,AKT1,BAG3,CBS,CDK5R1,DAPK3,DLL1,EEF2K,ERBB2,F2R,IL2RB,MAPK9,NDUFA13,NKX3-1,PL…
GO:BP	regulation of viral process	GO:0050792	FALSE	4.04E-28	27.3938	158	744	31	78724	ADAR,AICDA,APOBEC3A,BST2,DDX3X,EIF2AK2,IFI16,IFIH1,IFIT1,IFIT5,IFITM3,ISG15,LAMP3,LGALS9,MX1,OAS1,OAS2,OAS3,OASL,PKN2,PLSCR1,RSAD2,SP100,STAT1,TRIM22,TRIM38,TRIM5,TRIM58,APOBEC3H,TMEM250,TRIM32
GO:BP	regulation of cell population proliferation	GO:0042127	FALSE	5.10E-28	27.2928	1685	744	79	78724	BCAR3,BCL2L1,BST2,BTK,CALCRL,CAV1,CCR2,CD22,CD274,CD40,CD86,CLEC7A,COL4A3,CXCL10,CXCL9,DDAH1,EAF2,EIF2AK1,EIF2AK2,FANCL,FAP,FCGR2B,FOLR2,GCNT2,HHEX,HLA-DMB,IFI35,IFIT3,IL15,IL2,IL31RA,IL4I1,IL7,JAK2,KANK2,LGALS9,NCKAP1L,NFIB,NRG1,OSMR,PAWR,PHIP,PRLR,RB1,RICTOR,SLAMF1,SMAD1,SPTA1,STAT1,STAT2,TNFSF13B,TRPM4,WARS1,AKR1C3,AKT1,ASCL2,CCL3L3,CCND3,CD320,COL18A1,DHCR24,DLL1,ERBB2,F2R,GDF9,LBH,NFATC2,NKX…
GO:BP	system process	GO:0003008	FALSE	2.75E-27	26.5611	2293	744	91	78724	ABCG2,ACO1,ADCY6,ATP1B1,C3AR1,CALB1,CAV1,CCDC39,CCDC50,CCR2,CFAP54,CLCN1,CLIC2,COL4A3,CRYBA1,CSMD1,CXCL10,DDAH1,DIAPH3,DOCK4,DRAM2,GCH1,GNAS,HEXB,HLA-DRA,INHBB,KDM6A,MAP2K6,NLGN1,NTSR1,ODAD4,OR2I1P,OR2W3,OR52K1,PDLIM5,PKHD1L1,PNOC,PTPRO,RTP4,SCN9A,SERPING1,SLC1A3,SLC38A5,SLC44A1,SLC45A2,SLC8A3,SMTNL1,SNCA,SOBP,SSPN,STAT1,TMOD2,TRPM4,ZFAND5,ZNF354A,AKR1C3,AKT1,AXIN1,CA6,CBS,COL18A1,DAPK3,DHRS3,DLL…
GO:BP	cellular response to oxygen-containing compound	GO:1901701	FALSE	2.82E-27	26.5495	1182	744	66	78724	AANAT,ADCY6,AICDA,ALDH1A1,BCAR3,BCL11A,BTK,CACNA1A,CALCRL,CASP1,CASP7,CAV1,CD180,CD274,CD40,CD86,CLEC7A,CMPK2,CXCL10,CXCL9,CYBB,FAM210B,FCGR2B,FECH,FFAR2,FOLR2,GBP3,GCH1,GNAS,HGF,INHBB,IRAK3,JAK2,KANK2,KDM6A,KMO,MAP2K6,MRC1,PAWR,PHIP,PLSCR4,RB1,SASH1,SCIMP,SLC1A3,STAT1,TRIM5,TRPM4,XRN1,ZBTB20,AKR1C3,AKT1,AMIGO1,CDK5R1,DDIT4,DGKQ,EEF2K,GNRHR,MAPK9,NDUFA13,PDE3B,PDGFD,PTGDR,RGS9,SMPD3,SPON2
GO:BP	regulation of phosphate metabolic process	GO:0019220	FALSE	2.86E-27	26.5438	956	744	60	78724	ADAR,BANK1,BCAR3,C9ORF72,CAV1,CD40,DDX3X,DUSP3,EIF2AK1,FECH,HERC5,HGF,HHEX,HSPB1,IDH1,IL15,IL2,IL31RA,IL7,IRAK3,JAK2,LACC1,NCKAP1L,NRG1,NTSR1,PARP14,PARP9,PHIP,PLPP3,PRLR,RB1,RICTOR,SASH1,SLC8A3,SNCA,STAT2,STRADB,TLR7,TNFSF15,WARS1,ZBTB20,ADTRP,AKT1,AXIN1,CCND3,CDK5R1,CHI3L1,DDIT4,DGKQ,EEF2K,ERBB2,LDB1,MAD2L2,NKX3-1,PDGFD,PFKFB1,PRR5L,SMAD7,SMPD3,ZFYVE28
GO:BP	regulation of phosphorus metabolic process	GO:0051174	FALSE	3.02E-27	26.5195	957	744	60	78724	ADAR,BANK1,BCAR3,C9ORF72,CAV1,CD40,DDX3X,DUSP3,EIF2AK1,FECH,HERC5,HGF,HHEX,HSPB1,IDH1,IL15,IL2,IL31RA,IL7,IRAK3,JAK2,LACC1,NCKAP1L,NRG1,NTSR1,PARP14,PARP9,PHIP,PLPP3,PRLR,RB1,RICTOR,SASH1,SLC8A3,SNCA,STAT2,STRADB,TLR7,TNFSF15,WARS1,ZBTB20,ADTRP,AKT1,AXIN1,CCND3,CDK5R1,CHI3L1,DDIT4,DGKQ,EEF2K,ERBB2,LDB1,MAD2L2,NKX3-1,PDGFD,PFKFB1,PRR5L,SMAD7,SMPD3,ZFYVE28
GO:BP	transcription by RNA polymerase II	GO:0006366	FALSE	4.10E-27	26.3869	2711	744	99	78724	AICDA,APOBEC3A,BAZ2B,BCL11A,BHLHE41,CAV1,CD40,CREB5,CXCL10,DDX3X,E2F8,EAF2,ENSG00000288721,ETV7,HELZ2,HESX1,HEXB,HGF,HHEX,IFI16,IFI27,IL2,IL4I1,IRF7,IRF9,JAK2,KANK2,KDM6A,LMO2,MACC1,MXI1,NFIB,PARP9,PAWR,PAX5,PHIP,PLSCR1,RB1,RBBP8,S100A10,SETSIP,SMAD1,SNCA,SOX6,SP100,SP110,SP140,STAT1,STAT2,TCF4,TFEC,TLR7,TRPS1,YBX3,ZBTB20,ZFX,ZNF117,ZNF205,ZNF354A,ZNF705A,ZNF860,ACVR2B,AKT1,ASCL2,AXIN1,CCND3,CCNQ…
GO:BP	regulation of transport	GO:0051049	FALSE	4.31E-27	26.3658	1607	744	76	78724	ARHGAP44,ATP1B1,BCL2L1,BTK,C9ORF72,CAV1,CCR2,CD151,CD19,CD22,CLEC7A,CLIC2,CXCL10,CXCL9,DENND5B,DNAJC13,FCGR2B,FFAR2,GNAS,GOLPH3L,IFI27,IL15,INHBB,JAK2,KMO,LGALS9,MAOB,MAP2,MAP2K6,MIB1,MS4A1,MX2,NCKAP1L,NLGN1,NRG1,NSF,NTSR1,OAS2,PLSCR1,RSAD2,S100A10,SESTD1,SGIP1,SLAMF1,SNCA,SP100,TRIM58,TRPM4,ZNF205,ADTRP,AKAP5,AKT1,AMIGO1,BAG3,CDK5R1,DGKQ,DLL1,EEF2K,EXPH5,F2R,FEZ1,GDF9,IL2RB,MYO6,NKX3-1,PER2,PLK3…
GO:BP	protein localization	GO:0008104	FALSE	4.99E-27	26.302	2770	744	100	78724	ADAR,AP1S2,AP1S3,ARHGAP44,ARL4A,ATP1B1,BCL2L1,C9ORF72,CALCRL,CAV1,CC2D2A,CCDC39,CCDC68,DDX3X,DNAJC13,DTX3L,EIF2AK1,EPB41L3,FFAR2,GBP1,GNAS,GOLPH3L,GPC4,H4C1,HHEX,HSPB1,IFI27,IFIT1,IL1RN,INHBB,ISG15,JAK2,LAMP3,LYST,MAP2,MSR1,MX2,NASP,NLGN1,NSF,ODAD4,PARP9,RB1,RGPD2,RSAD2,RTP4,S100A10,SNCA,SNX22,SP100,STRADB,SWAP70,TRAK2,TRIM22,TRIM38,TRIM5,TRIM58,TRPM4,TTC21A,UGT8,VPS45,ACVR2B,ADTRP,AKAP5,AKT1,APB…
GO:BP	viral life cycle	GO:0019058	FALSE	6.22E-27	26.2061	310	744	38	78724	ADAR,AICDA,APOBEC3A,BST2,CAV1,CD86,CTSL,DDX3X,EIF2AK2,GYPA,IFI16,IFI27,IFIH1,IFIT1,IFIT5,IFITM3,ISG15,LAMP3,LGALS9,MRC1,MX1,OAS1,OAS2,OAS3,OASL,PKN2,PLSCR1,RSAD2,SIGLEC1,SLAMF1,SMC6,TRIM22,TRIM38,TRIM5,TRIM58,APOBEC3H,NCAM1,NECTIN1
GO:BP	cellular macromolecule localization	GO:0070727	FALSE	7.01E-27	26.1546	2782	744	100	78724	ADAR,AP1S2,AP1S3,ARHGAP44,ARL4A,ATP1B1,BCL2L1,C9ORF72,CALCRL,CAV1,CC2D2A,CCDC39,CCDC68,DDX3X,DNAJC13,DTX3L,EIF2AK1,EPB41L3,FFAR2,GBP1,GNAS,GOLPH3L,GPC4,H4C1,HHEX,HSPB1,IFI27,IFIT1,IL1RN,INHBB,ISG15,JAK2,LAMP3,LYST,MAP2,MSR1,MX2,NASP,NLGN1,NSF,ODAD4,PARP9,RB1,RGPD2,RSAD2,RTP4,S100A10,SNCA,SNX22,SP100,STRADB,SWAP70,TRAK2,TRIM22,TRIM38,TRIM5,TRIM58,TRPM4,TTC21A,UGT8,VPS45,ACVR2B,ADTRP,AKAP5,AKT1,APB…
GO:BP	regulation of protein modification process	GO:0031399	FALSE	8.04E-27	26.0945	1049	744	62	78724	ADAR,BANK1,BCAR3,C9ORF72,CAV1,CD40,DDX3X,DTX3L,DUSP3,EIF2AK1,FECH,HERC5,HGF,HHEX,HSPB1,IL15,IL2,IL31RA,IL7,IRAK3,ISG15,JAK2,NRG1,PARP14,PARP9,PHIP,PLPP3,PRLR,RB1,RICTOR,SASH1,SIAH2,SLC8A3,SNCA,STAT2,STRADB,TLR7,TNFSF15,WARS1,ADTRP,AKT1,ARRDC4,AXIN1,CCND3,CDK5R1,CHI3L1,DGKQ,EEF2K,ERBB2,HINT2,MAD2L2,MAPK9,NDN,NKX3-1,PDGFD,PER2,PRR5L,RASSF1,SMAD7,SMPD3,WASHC1,ZFYVE28
GO:BP	small molecule metabolic process	GO:0044281	FALSE	1.65E-26	25.7837	1776	744	79	78724	ABCG2,ACO1,ACOT9,ADCY6,AICDA,ALDH1A1,ATP1B1,CA1,CASP1,CAV1,CHEK2,CMPK2,DDAH1,DHRS9,ENTPD2,FECH,FGGY,GCH1,GK,GLYATL2,HNMT,HSD17B4,HSD17B6,IDH1,IL4I1,KMO,LACC1,MBD4,NAIP,NDUFV3,NME4,NT5C2,NTSR1,OAS1,OSBPL1A,PLPP3,PNPLA4,PUDP,SDSL,SLC1A3,SLC45A2,SLC7A7,SMPDL3A,SNCA,SPTLC2,ZBTB20,ACADVL,ACOT2,ADTRP,AK5,AKR1C3,AKT1,CA11,CA6,CARNS1,CBS,CD320,CDO1,DDIT4,DGKQ,DHCR24,DHRS3,EPHX2,FPGS,LRGUK,MGAT4A,MMAB,NDU…
GO:BP	negative regulation of signaling	GO:0023057	FALSE	2.57E-26	25.5895	1435	744	71	78724	ADAR,AIM2,ARHGAP24,ARHGAP44,BANK1,BCL2L1,BEND6,CAV1,CD22,CRYBA1,DDIAS,DDX3X,DUSP3,FCGR2B,FFAR2,GBP1,HGF,HHEX,HSPB1,IFI35,IFI6,IL1RN,IL7,INHBB,IRAK3,ISG15,KANK2,KDM6A,MAP3K20,NAIP,NRG1,OAS1,OAS3,PARP14,PAWR,PHIP,PTPRO,RB1,RIOK3,SIAH2,SLAMF1,SMPDL3A,SNCA,STAT1,STAT2,STRADB,USP18,USP25,WNT16,YBX3,AKT1,AXIN1,DAB1,DDIT4,DHRS3,DLL1,DUSP2,GRID2IP,LBH,MAD2L2,NKX3-1,PDE3B,PLK3,PRR5L,RGS9,SMAD7,SMPD3,SPRED…
GO:BP	negative regulation of cell communication	GO:0010648	FALSE	2.68E-26	25.5713	1436	744	71	78724	ADAR,AIM2,ARHGAP24,ARHGAP44,BANK1,BCL2L1,BEND6,CAV1,CD22,CRYBA1,DDIAS,DDX3X,DUSP3,FCGR2B,FFAR2,GBP1,HGF,HHEX,HSPB1,IFI35,IFI6,IL1RN,IL7,INHBB,IRAK3,ISG15,KANK2,KDM6A,MAP3K20,NAIP,NRG1,OAS1,OAS3,PARP14,PAWR,PHIP,PTPRO,RB1,RIOK3,SIAH2,SLAMF1,SMPDL3A,SNCA,STAT1,STAT2,STRADB,USP18,USP25,WNT16,YBX3,AKT1,AXIN1,DAB1,DDIT4,DHRS3,DLL1,DUSP2,GRID2IP,LBH,MAD2L2,NKX3-1,PDE3B,PLK3,PRR5L,RGS9,SMAD7,SMPD3,SPRED…
GO:BP	regulation of transcription by RNA polymerase II	GO:0006357	FALSE	3.50E-26	25.4559	2578	744	95	78724	BAZ2B,BCL11A,BHLHE41,CAV1,CD40,CREB5,CXCL10,DDX3X,E2F8,EAF2,ENSG00000288721,ETV7,HELZ2,HESX1,HEXB,HGF,HHEX,IFI16,IFI27,IL2,IL4I1,IRF7,IRF9,JAK2,KANK2,KDM6A,LMO2,MACC1,MXI1,NFIB,PARP9,PAWR,PAX5,PHIP,PLSCR1,RB1,RBBP8,S100A10,SETSIP,SMAD1,SNCA,SOX6,SP100,SP110,SP140,STAT1,STAT2,TCF4,TFEC,TLR7,TRPS1,YBX3,ZBTB20,ZFX,ZNF117,ZNF205,ZNF354A,ZNF705A,ZNF860,ACVR2B,AKT1,ASCL2,CCND3,CCNQ,DGKQ,DLL1,ESRRA,GLI4…
GO:BP	response to lipid	GO:0033993	FALSE	3.85E-26	25.4148	930	744	58	78724	AANAT,ADCY6,AICDA,BTK,CASP1,CASP7,CAV1,CD180,CD274,CD40,CD86,CMPK2,CXCL10,CXCL9,CYBB,FAM210B,FECH,FFAR2,GBP3,GCH1,GNAS,IDH1,IL1RN,INHBB,IRAK3,JAK2,KANK2,KDM6A,KMO,LGALS9,MAOB,MBD4,MRC1,NASP,NTSR1,PLSCR4,SASH1,SCIMP,SNCA,SP100,TRIM5,XRN1,ADTRP,AKR1C3,AKT1,CDO1,DDIT4,DGKQ,ESRRA,F2R,LBH,NDUFA13,NKX3-1,PFKFB1,PRMT2,PTGDR,RGS9,SPON2
GO:BP	positive regulation of response to biotic stimulus	GO:0002833	FALSE	4.30E-26	25.3667	400	744	41	78724	AIM2,BTK,CASP1,CAV1,CD180,CD274,CD40,CLEC7A,DDX3X,DDX60,EIF2AK2,FFAR2,IFI16,IFI35,IFIH1,IRAK3,IRF7,LACC1,MAP2K6,NAIP,OAS1,OAS3,OASL,PARP9,PIK3AP1,PLSCR1,RIOK3,RSAD2,SASH1,SCIMP,SMPDL3A,TLR10,TLR7,TRIM5,WDFY1,ZBP1,AKT1,KLRD1,SH2D1B,TRIM32,TXK
GO:BP	leukocyte mediated immunity	GO:0002443	FALSE	4.59E-26	25.3382	481	744	44	78724	AICDA,BST2,BTK,C1QA,C1QC,C5,CALHM6,CCR2,CD19,CD1C,CD274,CD40,CLEC7A,FCGR2B,HLA-DRA,IL2,IL4I1,IRF7,LGALS9,LYST,MILR1,NCKAP1L,RSAD2,SANBR,SCIMP,SERPING1,SLAMF1,SWAP70,TRPM4,CD1B,GZMB,GZMM,IL2RB,KIR3DL1,KLRD1,MAD2L2,MRGPRX2,NKG7,PRF1,PTGDR,SH2D1B,SMAD7,SPON2,TBX21
GO:BP	regulation of molecular function	GO:0065009	FALSE	5.46E-26	25.263	1496	744	72	78724	ADAR,AIM2,ARHGAP44,ATP1B1,BCAR3,BTK,CAV1,CCR2,CD40,CLEC7A,CLIC2,DDX3X,DTX3L,DUSP3,EIF2AK2,EVI5,FCGR2B,FGD4,GCH1,GNAS,HERC5,HHEX,HSPB1,IFI16,IFIT1,IFIT2,IRAK3,JAK2,LGALS9,MAP2,NLGN1,NRG1,OAS1,OAS3,PARP9,PLPP3,PLSCR1,PRLR,PTPRF,RASAL2,RB1,S100A10,SASH1,SLC8A3,SNCA,SP100,STRADB,TNFSF15,TRIM22,TRIM38,TRIM5,WARS1,AKAP5,AKT1,ARRDC4,AXIN1,CCND3,CDK5R1,CHI3L1,ERBB2,F2R,LDB1,MAD2L2,PER2,PRMT2,RHEBL1,SMAD7…
GO:BP	cytokine-mediated signaling pathway	GO:0019221	FALSE	9.53E-26	25.0209	518	744	45	78724	ADAR,AIM2,CASP1,CAV1,CCR2,CCRL2,CXCL10,CXCL9,IFI27,IFIH1,IFITM3,IFNE,IL15,IL1RN,IL2,IL31RA,IL7,IRAK3,IRF7,ISG15,JAK2,MX1,NAIP,OAS1,OAS2,OAS3,OASL,OSMR,PARP14,PARP9,PRLR,SP100,STAT1,STAT2,TNFSF13B,USP18,USP25,VRK2,ZBP1,AKT1,CCL3L3,IL2RB,TRADD,TRIM32,TXK
GO:BP	negative regulation of signal transduction	GO:0009968	FALSE	3.26E-25	24.4864	1326	744	67	78724	ADAR,AIM2,ARHGAP24,ARHGAP44,BANK1,BCL2L1,BEND6,CAV1,CD22,CRYBA1,DDIAS,DDX3X,DUSP3,FCGR2B,GBP1,HGF,HHEX,HSPB1,IFI35,IFI6,IL1RN,IL7,IRAK3,ISG15,KANK2,KDM6A,MAP3K20,NAIP,NRG1,OAS1,OAS3,PARP14,PAWR,PHIP,PTPRO,RB1,RIOK3,SIAH2,SLAMF1,SMPDL3A,SNCA,STAT1,STAT2,STRADB,USP18,USP25,WNT16,YBX3,AKT1,AXIN1,DAB1,DDIT4,DHRS3,DLL1,DUSP2,LBH,MAD2L2,NKX3-1,PDE3B,PLK3,PRR5L,RGS9,SMAD7,SMPD3,SPRED3,TRIM32,ZFYVE28
GO:BP	vesicle-mediated transport	GO:0016192	FALSE	4.27E-25	24.3694	1592	744	73	78724	AP1S2,AP1S3,ARHGAP44,ARL4A,BCL2L1,BTK,C9ORF72,CALCRL,CAV1,CCR2,CD151,CD22,CLEC10A,CLEC7A,CRYBA1,CTSL,DIAPH3,DNAJC13,DNM1,DTX3L,EIF2AK1,EVI5,EXOC3L1,FCGR2B,GOLPH3L,IL15,LGALS9,LYST,MARCHF3,MARCO,MIB1,MILR1,MRC1,MSR1,NCKAP1L,NLGN1,NRG1,NSF,OSBPL1A,PLPP3,PLSCR1,RIN2,RUBCNL,S100A10,SAMD9,SGIP1,SIGLEC1,SLAMF1,SNCA,VPS45,XKR9,AKAP5,ARL4C,CACFD1,CD320,CDK5R1,DGKQ,DLL1,EEF2K,EXPH5,IL2RB,LLGL2,MRGPRX2,MYO…
GO:BP	regulation of phosphorylation	GO:0042325	FALSE	4.52E-25	24.3451	830	744	54	78724	ADAR,BANK1,BCAR3,C9ORF72,CAV1,CD40,DDX3X,DUSP3,EIF2AK1,FECH,HERC5,HGF,HHEX,HSPB1,IL15,IL2,IL31RA,IL7,IRAK3,JAK2,NCKAP1L,NRG1,PARP14,PARP9,PHIP,PLPP3,PRLR,RB1,RICTOR,SASH1,SLC8A3,SNCA,STAT2,STRADB,TLR7,TNFSF15,WARS1,ADTRP,AKT1,AXIN1,CCND3,CDK5R1,CHI3L1,DGKQ,EEF2K,ERBB2,LDB1,MAD2L2,NKX3-1,PDGFD,PRR5L,SMAD7,SMPD3,ZFYVE28
GO:BP	positive regulation of innate immune response	GO:0045089	FALSE	5.27E-25	24.2783	374	744	39	78724	AIM2,BTK,CASP1,CAV1,CD274,CD40,CLEC7A,DDX3X,DDX60,EIF2AK2,FFAR2,IFI16,IFI35,IFIH1,IRAK3,IRF7,LACC1,MAP2K6,NAIP,OAS1,OAS3,OASL,PARP9,PIK3AP1,PLSCR1,RIOK3,RSAD2,SCIMP,SMPDL3A,TLR10,TLR7,TRIM5,WDFY1,ZBP1,AKT1,KLRD1,SH2D1B,TRIM32,TXK
GO:BP	regulation of viral life cycle	GO:1903900	FALSE	7.30E-25	24.1364	131	744	27	78724	ADAR,AICDA,APOBEC3A,BST2,DDX3X,EIF2AK2,IFI16,IFIH1,IFIT1,IFIT5,IFITM3,ISG15,LAMP3,LGALS9,MX1,OAS1,OAS2,OAS3,OASL,PKN2,PLSCR1,RSAD2,TRIM22,TRIM38,TRIM5,TRIM58,APOBEC3H
GO:BP	negative regulation of immune system process	GO:0002683	FALSE	7.90E-25	24.1026	515	744	44	78724	ADAR,BANK1,BST2,BTK,C1QC,C5,C9ORF72,CCR2,CD22,CD274,DUSP3,FCGR2B,GBP1,GNAS,IFI16,IL2,IL31RA,IL4I1,IRAK3,ISG15,LGALS9,MILR1,NCKAP1L,OAS1,OAS3,PARP14,PAWR,RIOK3,SERPING1,SLAMF1,SMPDL3A,STAT2,USP18,ADTRP,AKT1,ASCL2,CCL28,DLL1,ERBB2,KLRD1,SMAD7,TBX21,TRIM32,ZFPM1
GO:BP	positive regulation of intracellular signal transduction	GO:1902533	FALSE	1.35E-24	23.8703	1113	744	61	78724	BANK1,BCAR3,BST2,BTK,CASP1,CAV1,CD19,CD40,CD86,CLEC7A,DDX3X,DDX60,EIF2AK2,FCGR2B,GCNT2,HGF,IFI35,IFIT5,JAK2,KIAA0319,LGALS9,MAP2K6,MAP3K20,MARCO,NAIP,NCKAP1L,NLGN1,NRG1,OASL,PIK3AP1,RICTOR,RSAD2,SASH1,SCIMP,SLAMF1,SLC38A9,TLR7,TNFSF10,TRIM22,TRIM38,TRIM5,TRIM58,WDFY1,WNT16,AKAP5,AKR1C3,AKT1,AXIN1,CHI3L1,ERBB2,F2R,NKX3-1,NMUR1,PDGFD,PRR5,PRR5L,PTP4A3,S100B,SH3RF3,TRADD,TRIM32
GO:BP	import into cell	GO:0098657	FALSE	1.37E-24	23.8621	922	744	56	78724	ATP1B1,BCL2L1,BTK,C9ORF72,CACNA1A,CACNA1E,CALCRL,CAV1,CCR2,CD151,CD22,CLEC10A,CLEC7A,CRYBA1,CTSL,DNAJC13,DNM1,EIF2AK1,FCGR2B,IL15,LYST,MARCHF3,MARCO,MIB1,MRC1,MS4A1,MSR1,NCKAP1L,NLGN1,NRG1,NTSR1,PLSCR1,RIN2,SGIP1,SIGLEC1,SLAMF1,SLC1A3,SLC38A5,SLC8A3,SLC9A9,SNCA,TRPM4,TSPO2,XKR9,AKAP5,AKT1,DGKQ,DLL1,EEF2K,IL2RB,MYO6,PER2,SLC12A1,SPON2,SYNJ2,TUB
GO:BP	regulation of protein phosphorylation	GO:0001932	FALSE	1.39E-24	23.8577	779	744	52	78724	ADAR,BANK1,BCAR3,C9ORF72,CAV1,CD40,DDX3X,DUSP3,EIF2AK1,FECH,HERC5,HGF,HHEX,HSPB1,IL15,IL2,IL31RA,IL7,IRAK3,JAK2,NRG1,PARP14,PARP9,PHIP,PLPP3,PRLR,RB1,RICTOR,SASH1,SLC8A3,SNCA,STAT2,STRADB,TLR7,TNFSF15,WARS1,ADTRP,AKT1,AXIN1,CCND3,CDK5R1,CHI3L1,DGKQ,EEF2K,ERBB2,MAD2L2,NKX3-1,PDGFD,PRR5L,SMAD7,SMPD3,ZFYVE28
GO:BP	anatomical structure formation involved in morphogenesis	GO:0048646	FALSE	1.76E-24	23.7552	1199	744	63	78724	ARHGAP24,C1GALT1,C3AR1,CALB1,CALCRL,CAV1,CC2D2A,CCR2,CD40,COL4A3,CXCL10,CXCL9,CYBB,DDAH1,E2F8,EPB41L3,FAP,GNAS,HESX1,HHEX,HSPB1,KDM6A,MIB1,NFIB,SASH1,SAT1,SEMA3C,SMAD1,SP100,STARD13,STAT1,TMOD2,TNFSF13B,UGT8,WARS1,WNT16,ACVR2B,ADTRP,AKT1,AXIN1,CDK5R1,CHI3L1,CLIC3,COL18A1,DAB1,DLL1,DUSP2,ERBB2,FMN1,LDB1,MFNG,MYBPH,NECTIN1,NFATC2,NKX3-1,NLE1,NRCAM,PDE3B,PHLDB2,SCGB3A1,SMPD3,ST14,ZFPM1
GO:BP	RNA metabolic process	GO:0016070	FALSE	2.16E-24	23.666	6873	744	162	78724	ADAR,AICDA,AIM2,APOBEC3A,BAZ2B,BCL11A,BEND6,BHLHE41,BTK,CAV1,CD274,CD40,CD86,CHEK2,CLEC7A,CREB5,CXCL10,DDX3X,DTX3L,E2F8,EAF2,EIF2AK2,ENSG00000288721,ETV7,H4C1,HELZ2,HESX1,HEXB,HGF,HHEX,HNRNPH3,IFI16,IFI27,IL2,IL31RA,IL4I1,IRAK3,IRF7,IRF9,JAK2,KANK2,KDM6A,LGALS9,LMO2,LRRFIP2,MACC1,MBNL3,MRPL12,MXI1,NFIB,NRG1,NSUN3,OAS1,OAS2,OAS3,PARP14,PARP9,PAWR,PAX5,PHIP,PLPP3,PLSCR1,PNPT1,PUS10,RB1,RBBP8,RIOK3,…
GO:BP	multicellular organismal-level homeostasis	GO:0048871	FALSE	2.64E-24	23.5783	825	744	53	78724	ADAR,ADCY6,AIM2,ALAS2,ALDH1A1,BTK,CAV1,CCR2,DIAPH3,DRAM2,EIF2AK1,FAM210B,FECH,FSTL1,GCNT2,GNAS,IL15,IL2,IL7,ISG15,JAK2,LGALS9,MAP2K6,NCKAP1L,NFIB,NTSR1,OAS1,PRLR,RASAL2,RB1,SGIP1,SPTA1,STAT1,TNFSF13B,TRIM58,TSPO2,ZFX,ACADVL,ACVR2B,AKT1,DLL1,F2R,LDB1,MEX3C,NDN,NLE1,NR1D2,PER2,PTGES,TP53INP2,TRIM32,TUB,ZFPM1
GO:BP	positive regulation of RNA metabolic process	GO:0051254	FALSE	3.66E-24	23.4369	1835	744	77	78724	BCL11A,CD274,CD40,CD86,CHEK2,CREB5,CXCL10,DDX3X,DTX3L,E2F8,EAF2,HELZ2,HEXB,HGF,HHEX,IFI16,IL2,IL31RA,IL4I1,IRF7,IRF9,JAK2,KDM6A,LMO2,MACC1,MRPL12,NFIB,PARP9,PAX5,PHIP,PLSCR1,PNPT1,RB1,S100A10,SAMD4A,SETSIP,SMAD1,SP100,STAT1,STAT2,TCF4,TFEC,TLR7,TRIM22,TRIM38,TRIM5,ZFX,AKT1,ASCL2,CAND2,DLL1,ERBB2,ESRRA,F2R,LBH,LDB1,MAD2L2,MAFF,MED27,NDN,NFATC2,NKX3-1,NPAS2,NR1D2,PER2,PRMT2,PRR5L,SKAP1,TBX21,THAP11…
GO:BP	positive regulation of DNA-templated transcription	GO:0045893	FALSE	3.92E-24	23.4071	1697	744	74	78724	BCL11A,CD274,CD40,CD86,CHEK2,CREB5,CXCL10,DDX3X,DTX3L,E2F8,EAF2,HELZ2,HEXB,HGF,HHEX,IFI16,IL2,IL31RA,IL4I1,IRF7,IRF9,JAK2,KDM6A,LMO2,MACC1,MRPL12,NFIB,PARP9,PAX5,PHIP,PLSCR1,RB1,S100A10,SETSIP,SMAD1,SP100,STAT1,STAT2,TCF4,TFEC,TLR7,TRIM22,TRIM38,TRIM5,ZFX,AKT1,ASCL2,CAND2,DLL1,ERBB2,ESRRA,F2R,LBH,LDB1,MAD2L2,MAFF,MED27,NDN,NFATC2,NKX3-1,NPAS2,NR1D2,PER2,PRMT2,SKAP1,TBX21,THAP11,TP53INP2,TRIM32,TX…
GO:BP	positive regulation of RNA biosynthetic process	GO:1902680	FALSE	4.21E-24	23.3759	1699	744	74	78724	BCL11A,CD274,CD40,CD86,CHEK2,CREB5,CXCL10,DDX3X,DTX3L,E2F8,EAF2,HELZ2,HEXB,HGF,HHEX,IFI16,IL2,IL31RA,IL4I1,IRF7,IRF9,JAK2,KDM6A,LMO2,MACC1,MRPL12,NFIB,PARP9,PAX5,PHIP,PLSCR1,RB1,S100A10,SETSIP,SMAD1,SP100,STAT1,STAT2,TCF4,TFEC,TLR7,TRIM22,TRIM38,TRIM5,ZFX,AKT1,ASCL2,CAND2,DLL1,ERBB2,ESRRA,F2R,LBH,LDB1,MAD2L2,MAFF,MED27,NDN,NFATC2,NKX3-1,NPAS2,NR1D2,PER2,PRMT2,SKAP1,TBX21,THAP11,TP53INP2,TRIM32,TX…
GO:BP	positive regulation of nucleobase-containing compound metabolic process	GO:0045935	FALSE	4.87E-24	23.3123	2036	744	81	78724	BCL11A,CD274,CD40,CD86,CHEK2,CREB5,CXCL10,DDX3X,DTX3L,E2F8,EAF2,GCH1,HELZ2,HEXB,HGF,HHEX,IFI16,IL2,IL31RA,IL4I1,IRF7,IRF9,JAK2,KDM6A,LMO2,MACC1,MRPL12,NFIB,PARP9,PAX5,PHIP,PLSCR1,PNPT1,RB1,S100A10,SAMD4A,SETSIP,SMAD1,SMCHD1,SP100,STAT1,STAT2,TCF4,TFEC,TLR7,TRIM22,TRIM38,TRIM5,ZBTB20,ZFX,AKT1,ASCL2,CAND2,DLL1,ERBB2,ESRRA,F2R,LBH,LDB1,MAD2L2,MAFF,MED27,NDN,NFATC2,NKX3-1,NPAS2,NR1D2,PER2,PFKFB1,PRMT…
GO:BP	nucleobase-containing compound biosynthetic process	GO:0034654	FALSE	5.88E-24	23.2303	7076	744	164	78724	ADAR,ADCY6,AICDA,AIM2,APOBEC3A,BAZ2B,BCL11A,BEND6,BHLHE41,BTK,CAV1,CD274,CD40,CD86,CHEK2,CLEC7A,CMPK2,CREB5,CXCL10,DDX3X,DTX3L,E2F8,EAF2,EIF2AK2,ENSG00000288721,ETV7,GCH1,H4C1,HELZ2,HESX1,HEXB,HGF,HHEX,HNRNPH3,IFI16,IFI27,IL2,IL31RA,IL4I1,IRAK3,IRF7,IRF9,JAK2,KANK2,KDM6A,KMO,LGALS9,LMO2,LRRFIP2,MACC1,MBNL3,MRPL12,MXI1,NDUFV3,NFIB,NME4,NRG1,NSUN3,PARP14,PARP9,PAWR,PAX5,PHIP,PLPP3,PLSCR1,PNPT1,POLK…
GO:BP	negative regulation of nucleobase-containing compound metabolic process	GO:0045934	FALSE	6.42E-24	23.1927	1529	744	70	78724	AICDA,APOBEC3A,AUNIP,BCL11A,BEND6,BHLHE41,CAV1,E2F8,ETV7,HESX1,HHEX,IFI16,IFI27,IRF7,KANK2,MXI1,NFIB,NRG1,PARP14,PARP9,PAWR,PAX5,RB1,RBBP8,SIAH2,SMCHD1,SMTNL1,SNCA,SOX6,SP100,STAT1,TENT5A,TENT5C,TFEC,TRIM22,TRPS1,XRN1,YBX3,ZBTB20,ZNF205,ACVR2B,APOBEC3H,ASCL2,AXIN1,BAHD1,CCND3,CDK5R1,DDIT4,LBH,LDB1,MAD2L2,MAFF,NDN,NDUFA13,NFATC2,NKX3-1,NR1D2,NR2F6,PER2,PER3,PFKFB1,PLK3,PRMT2,SARNP,SMAD7,TBX21,THAP…
GO:BP	neurogenesis	GO:0022008	FALSE	1.03E-23	22.9852	1771	744	75	78724	ADCY6,ANOS1,ARHGAP44,BAHCC1,BCL11A,BEND6,BHLHE41,C1QA,C9ORF72,CCR2,DIAPH3,EPB41L3,FAM151B,HEXB,IL2,JAK2,KIAA0319,MAP2,MIB1,NAV3,NCKAP1L,NEXN,NFIB,NLGN1,PDLIM5,PLPP3,PTPRF,PTPRO,RB1,S100A10,SEMA3C,SLC1A3,SLC8A3,SLITRK4,SOX6,TCF4,TRAK2,UGT8,WNT10A,WNT16,AKT1,AMIGO1,ARHGEF28,ASCL2,BTBD6,CDK5R1,CYFIP2,DAB1,DDIT4,DLL1,EEF2K,ERBB2,FAT4,FEZ1,LAMC3,LDB1,LGR6,MANF,METRN,MYEF2,MYO6,NCAM1,NDN,NECTIN1,NELL2,…
GO:BP	activation of innate immune response	GO:0002218	FALSE	1.16E-23	22.9337	305	744	35	78724	AIM2,BTK,CASP1,CAV1,CD274,CD40,CLEC7A,DDX3X,DDX60,EIF2AK2,FFAR2,IFI16,IFI35,IFIH1,IRAK3,IRF7,LACC1,MAP2K6,NAIP,OAS1,OAS3,OASL,PIK3AP1,RIOK3,RSAD2,SCIMP,SMPDL3A,TLR10,TLR7,TRIM5,WDFY1,ZBP1,AKT1,KLRD1,TRIM32
GO:BP	nitrogen compound transport	GO:0071705	FALSE	1.41E-23	22.8506	1923	744	78	78724	ABCG2,ADAR,AP1S2,AP1S3,ARHGAP44,ARL4A,ATP1B1,BTK,CALCRL,CALHM6,CAV1,DNAJC13,DTX3L,EXOC3L1,FFAR2,FOLR2,FOLR3,GNAS,GOLPH3L,HHEX,HSPB1,IFI27,IFIT1,IL1RN,INHBB,JAK2,KMO,LYST,MAOB,MSR1,MX2,NASP,NSF,NTSR1,PNPT1,RGPD2,RSAD2,SLC14A1,SLC1A3,SLC38A5,SLC38A9,SLC44A1,SLC7A7,SNCA,SNX22,SP100,STRADB,TCN2,TRPM4,TSPO2,VPS45,ACVR2B,ADTRP,AKAP5,AKT1,APBA2,ARL4C,ARRDC4,BAG3,CD320,EXPH5,F2R,LLGL2,MYO6,NDUFA13,PER2,P…
GO:BP	cellular response to stress	GO:0033554	FALSE	1.55E-23	22.8101	1830	744	76	78724	AIM2,AUNIP,BCL2L1,BTK,CASP1,CAV1,CHEK2,CIP2A,CXCL10,CYBB,DDAH1,DDIAS,DDX3X,DTX3L,EIF2AK1,EIF2AK2,FAM8A1,FANCL,FCGR2B,FECH,GCH1,HERC5,HGF,HSPB1,IFI16,INHBB,IRF7,JAK2,KDM6A,KIAA0319,MAP2K6,MAP3K20,MBD4,PARP9,PAWR,PNPT1,POLK,PTPRF,RBBP8,SCIMP,SLC8A3,SMC6,SMCHD1,SNCA,SP100,TFEC,USP25,VRK2,WNT16,YBX3,AKR1C3,AKT1,BAG3,CBS,DDIT4,EEF2K,MAD2L2,MANF,MAPK9,MUS81,MYO6,NFATC2,NKX3-1,NME3,NPAS2,PARP16,PDGFD,PH…
GO:BP	response to bacterium	GO:0009617	FALSE	3.35E-23	22.4747	728	744	49	78724	AICDA,BANK1,BTK,CASP1,CASP7,CAV1,CD180,CD274,CD40,CD86,CMPK2,CXCL10,CXCL9,FCGR2B,GBP1,GBP3,GCH1,HERC6,IFI44,IFNE,IRAK3,ISG15,JAK2,KMO,LGALS9,LYST,LYZ,MAOB,MRC1,MS4A1,NAIP,NFIB,OAS1,OAS2,OAS3,PLSCR4,PRLR,SASH1,SCIMP,SLC9A9,SNCA,TENT5A,TLR10,TRIM5,USP18,AKT1,F2R,GNLY,SPON2
GO:BP	negative regulation of RNA biosynthetic process	GO:1902679	FALSE	1.16E-22	21.9368	1296	744	63	78724	AICDA,APOBEC3A,BCL11A,BEND6,BHLHE41,CAV1,E2F8,ETV7,HESX1,HHEX,IFI16,IFI27,IRF7,KANK2,MXI1,NFIB,NRG1,PARP14,PARP9,PAWR,PAX5,RB1,RBBP8,SIAH2,SMTNL1,SNCA,SOX6,SP100,STAT1,TFEC,TRIM22,TRPS1,YBX3,ZBTB20,ZNF205,ACVR2B,APOBEC3H,ASCL2,AXIN1,BAHD1,CCND3,CDK5R1,LBH,LDB1,MAD2L2,MAFF,NDN,NDUFA13,NFATC2,NKX3-1,NR1D2,NR2F6,PER2,PER3,PLK3,PRMT2,SARNP,SMAD7,TBX21,THAP11,WDR82,ZBTB45,ZFPM1
GO:BP	lymphocyte mediated immunity	GO:0002449	FALSE	1.62E-22	21.7908	381	744	37	78724	AICDA,BTK,C1QA,C1QC,C5,CALHM6,CCR2,CD19,CD1C,CD274,CD40,FCGR2B,HLA-DRA,IL2,IL4I1,IRF7,LGALS9,LYST,NCKAP1L,RSAD2,SANBR,SERPING1,SLAMF1,SWAP70,TRPM4,CD1B,GZMB,GZMM,IL2RB,KIR3DL1,KLRD1,MAD2L2,NKG7,PRF1,SH2D1B,SMAD7,TBX21
GO:BP	negative regulation of RNA metabolic process	GO:0051253	FALSE	2.29E-22	21.6401	1400	744	65	78724	AICDA,APOBEC3A,BCL11A,BEND6,BHLHE41,CAV1,E2F8,ETV7,HESX1,HHEX,IFI16,IFI27,IRF7,KANK2,MXI1,NFIB,NRG1,PARP14,PARP9,PAWR,PAX5,RB1,RBBP8,SIAH2,SMTNL1,SNCA,SOX6,SP100,STAT1,TENT5A,TENT5C,TFEC,TRIM22,TRPS1,YBX3,ZBTB20,ZNF205,ACVR2B,APOBEC3H,ASCL2,AXIN1,BAHD1,CCND3,CDK5R1,LBH,LDB1,MAD2L2,MAFF,NDN,NDUFA13,NFATC2,NKX3-1,NR1D2,NR2F6,PER2,PER3,PLK3,PRMT2,SARNP,SMAD7,TBX21,THAP11,WDR82,ZBTB45,ZFPM1
GO:BP	nucleic acid biosynthetic process	GO:0141187	FALSE	3.30E-22	21.4808	6782	744	156	78724	ADAR,AICDA,AIM2,APOBEC3A,BAZ2B,BCL11A,BEND6,BHLHE41,BTK,CAV1,CD274,CD40,CD86,CHEK2,CLEC7A,CREB5,CXCL10,DDX3X,DTX3L,E2F8,EAF2,EIF2AK2,ENSG00000288721,ETV7,GCH1,H4C1,HELZ2,HESX1,HEXB,HGF,HHEX,HNRNPH3,IFI16,IFI27,IL2,IL31RA,IL4I1,IRAK3,IRF7,IRF9,JAK2,KANK2,KDM6A,LGALS9,LMO2,LRRFIP2,MACC1,MBNL3,MRPL12,MXI1,NFIB,NRG1,NSUN3,PARP14,PARP9,PAWR,PAX5,PHIP,PLPP3,PLSCR1,PNPT1,POLK,PUS10,RB1,RBBP8,RIOK3,S100A…
GO:BP	regulation of viral genome replication	GO:0045069	FALSE	4.84E-22	21.3149	87	744	22	78724	ADAR,AICDA,APOBEC3A,BST2,DDX3X,EIF2AK2,IFI16,IFIH1,IFIT1,IFIT5,IFITM3,ISG15,MX1,OAS1,OAS2,OAS3,OASL,PKN2,PLSCR1,RSAD2,TRIM38,APOBEC3H
GO:BP	locomotion	GO:0040011	FALSE	7.23E-22	21.1406	1255	744	61	78724	ANOS1,BST2,C3AR1,C5,CAV1,CCR2,CCRL2,CD151,CD274,CD40,CLEC7A,CXCL10,CXCL9,DOCK4,DUSP3,FFAR2,FPR3,GCNT1,GCNT2,HGF,HSPB1,JAK2,LGALS9,LYST,NAV3,NCKAP1L,NEXN,NRG1,PKN2,PLPP3,PTPRO,RIN2,SASH1,SEMA3C,SLAMF1,SNCA,SP100,STARD13,SWAP70,TRPM4,ADTRP,AKT1,ASCL2,CCL28,CCL3L3,DAPK3,F2R,LDB1,LGR6,PARD6B,PDGFD,PHLDB2,PRR5L,PTGDR2,SMAD7,SMPD3,TACR2,TMSB15B,TRADD,TRIM32,WASHC1
GO:BP	hemopoiesis	GO:0030097	FALSE	1.04E-21	20.981	976	744	54	78724	ADAR,AICDA,ALAS2,BLNK,BTK,C1QC,CCR2,CD19,CD86,CTSL,DIAPH3,EIF2AK1,EIF2AK2,FAM210B,FCGR2B,FECH,GLRX5,H4C1,HERC6,HHEX,HLA-DRA,IFI16,IFNE,IL15,IL2,IL31RA,IL4I1,IL7,IRF7,ISG15,JAK2,LGALS9,MS4A1,NCKAP1L,PAX5,RB1,RSAD2,SLAMF1,SLC8A3,SPTA1,STAT1,TNFSF13B,TRIM58,TSPO2,ASCL2,DLL1,ERBB2,LDB1,MFNG,PRXL2A,SMAD7,SMPD3,TBX21,ZFPM1
GO:BP	response to endogenous stimulus	GO:0009719	FALSE	1.22E-21	20.9151	1489	744	66	78724	AANAT,ADCY6,BCAR3,CAV1,CTSL,CYBB,DUSP3,FECH,FSTL1,GCNT1,GCNT2,GNAS,HGF,HHEX,HSPB1,IDH1,IL1RN,INHBB,JAK2,KANK2,KDM6A,LCN8,MAOB,PHIP,PNPT1,PRLR,RB1,SMAD1,SOX6,SP100,STAT1,STAT2,TNFSF10,WNT10A,ACVR2B,ADTRP,AKR1C3,AKT1,AXIN1,CDO1,CYFIP2,DDIT4,DHCR24,DHRS3,DLL1,EEF2K,ERBB2,ESRRA,FAT4,FEZ1,GDF9,GNRHR,LBH,MUS81,NDN,NKX3-1,NR1D2,PDE3B,PDGFD,PFKFB1,PRMT2,PTGDR,PTP4A3,SMAD7,SMPD3,SPRED3
GO:BP	adaptive immune response	GO:0002250	FALSE	1.92E-21	20.7164	762	744	48	78724	AICDA,BTK,BTLA,C1QA,C1QC,C5,CCR2,CD19,CD1C,CD274,CD40,CD86,CLEC10A,CLEC4C,CLEC7A,CTSL,FCGR2B,HLA-DMA,HLA-DMB,HLA-DRA,IFNE,IL2,IL4I1,IRF7,JAK2,LAMP3,MARCHF8,NCKAP1L,RSAD2,SANBR,SERPING1,SLAMF1,SWAP70,TNFSF13B,TRPM4,ASCL2,CD1B,CD247,GZMM,IL2RB,KLRD1,MAD2L2,PRF1,SH2D1B,SKAP1,SMAD7,TBX21,TXK
GO:BP	innate immune response-activating signaling pathway	GO:0002758	FALSE	3.23E-21	20.4914	284	744	32	78724	AIM2,BTK,CASP1,CAV1,CD274,CD40,CLEC7A,DDX3X,DDX60,EIF2AK2,FFAR2,IFI35,IFIH1,IRAK3,IRF7,LACC1,MAP2K6,NAIP,OAS1,OAS3,OASL,PIK3AP1,RIOK3,RSAD2,SCIMP,SMPDL3A,TLR10,TLR7,WDFY1,AKT1,KLRD1,TRIM32
GO:BP	B cell activation	GO:0042113	FALSE	4.02E-21	20.3958	286	744	32	78724	AICDA,BANK1,BLNK,BST2,BTK,CD180,CD19,CD22,CD40,CD86,FCGR2B,FCRL1,FCRL5,HHEX,IFNE,IL2,IL4I1,IL7,MS4A1,NCKAP1L,PAWR,PAX5,PRLR,SANBR,SWAP70,TNFSF13B,CD320,DLL1,MAD2L2,MFNG,NFATC2,TBX21
GO:BP	RNA biosynthetic process	GO:0032774	FALSE	4.15E-21	20.3824	6671	744	152	78724	ADAR,AICDA,AIM2,APOBEC3A,BAZ2B,BCL11A,BEND6,BHLHE41,BTK,CAV1,CD274,CD40,CD86,CHEK2,CLEC7A,CREB5,CXCL10,DDX3X,DTX3L,E2F8,EAF2,EIF2AK2,ENSG00000288721,ETV7,H4C1,HELZ2,HESX1,HEXB,HGF,HHEX,HNRNPH3,IFI16,IFI27,IL2,IL31RA,IL4I1,IRAK3,IRF7,IRF9,JAK2,KANK2,KDM6A,LGALS9,LMO2,LRRFIP2,MACC1,MBNL3,MRPL12,MXI1,NFIB,NRG1,NSUN3,PARP14,PARP9,PAWR,PAX5,PHIP,PLPP3,PLSCR1,PNPT1,PUS10,RB1,RBBP8,RIOK3,S100A10,SETSIP,…
GO:BP	establishment of localization in cell	GO:0051649	FALSE	4.76E-21	20.3227	2010	744	76	78724	ADAR,AP1S2,AP1S3,ARHGAP44,ARL4A,ATP1B1,BTK,C9ORF72,CAV1,CCDC39,CCR2,CFAP54,DIAPH3,DNAJC13,DNM1,DTX3L,EIF2AK1,EVI5,FCGR2B,GNAS,HHEX,HPS5,HSPB1,IFI27,JAK2,KMO,LGALS9,LYST,MAP2,MILR1,MSR1,MX2,NCKAP1L,NLGN1,NRG1,NSF,RB1,RGPD2,SGIP1,SLC14A1,SNCA,SP100,STRADB,TRAK2,TRIM58,TRPM4,TSPO2,TTC21A,VPS45,AKAP5,AKT1,ARL4C,AXIN1,BAG3,CDK5R1,DGKQ,DYNC2I1,EXPH5,FEZ1,LLGL2,MRGPRX2,MYO6,NDUFA13,NKG7,PER2,PLK3,PRR5L,…
GO:BP	negative regulation of viral process	GO:0048525	FALSE	5.84E-21	20.2332	83	744	21	78724	AICDA,APOBEC3A,BST2,EIF2AK2,IFI16,IFIH1,IFIT1,IFIT5,IFITM3,ISG15,MX1,OAS1,OAS2,OAS3,OASL,PLSCR1,RSAD2,SP100,STAT1,APOBEC3H,TRIM32
GO:BP	negative regulation of DNA-templated transcription	GO:0045892	FALSE	1.13E-20	19.9488	1280	744	60	78724	BCL11A,BEND6,BHLHE41,CAV1,E2F8,ETV7,HESX1,HHEX,IFI16,IFI27,IRF7,KANK2,MXI1,NFIB,NRG1,PARP14,PARP9,PAWR,PAX5,RB1,RBBP8,SIAH2,SMTNL1,SNCA,SOX6,SP100,STAT1,TFEC,TRIM22,TRPS1,YBX3,ZBTB20,ZNF205,ACVR2B,ASCL2,AXIN1,BAHD1,CCND3,CDK5R1,LBH,LDB1,MAD2L2,MAFF,NDN,NDUFA13,NFATC2,NKX3-1,NR1D2,NR2F6,PER2,PER3,PLK3,PRMT2,SARNP,SMAD7,TBX21,THAP11,WDR82,ZBTB45,ZFPM1
GO:BP	viral genome replication	GO:0019079	FALSE	1.38E-20	19.8616	131	744	24	78724	ADAR,AICDA,APOBEC3A,BST2,DDX3X,EIF2AK2,IFI16,IFI27,IFIH1,IFIT1,IFIT5,IFITM3,ISG15,MX1,OAS1,OAS2,OAS3,OASL,PKN2,PLSCR1,RSAD2,SMC6,TRIM38,APOBEC3H
GO:BP	positive regulation of developmental process	GO:0051094	FALSE	2.32E-20	19.6343	1343	744	61	78724	BCL11A,BEND6,BTK,C3AR1,CD40,CD86,CLEC7A,CXCL9,CYBB,DDAH1,FAM210B,GCNT2,HGF,HLA-DRA,HSPB1,IL15,IL2,IL4I1,IL7,ISG15,JAK2,LGALS9,MSR1,NCKAP1L,NLGN1,NRG1,RB1,RIN2,SASH1,SLITRK4,SMAD1,SOX6,STAT1,TCF4,TENT5A,TNFSF13B,TRPM4,YBX3,ACVR2B,AKT1,AMIGO1,CHI3L1,CLIC3,DAB1,DLL1,EEF2K,LBH,MAD2L2,MAPK9,METRN,NFATC2,NRCAM,PHLDB2,S100B,SCGB3A1,SMAD7,SULT1E1,TBX21,TMEM79,TRADD,TRIM32
GO:BP	neuron differentiation	GO:0030182	FALSE	4.39E-20	19.3575	1451	744	63	78724	ADCY6,ANOS1,ARHGAP44,BAHCC1,BCL11A,BEND6,C1QA,C9ORF72,DIAPH3,EPB41L3,FAM151B,IL2,JAK2,KIAA0319,MAP2,MIB1,NCKAP1L,NEXN,NFIB,NLGN1,PDLIM5,PTPRF,PTPRO,RB1,SEMA3C,SLC1A3,SLITRK4,TCF4,UGT8,WNT10A,WNT16,AKT1,AMIGO1,ARHGEF28,ASCL2,CDK5R1,CYFIP2,DAB1,DDIT4,DLL1,EEF2K,ERBB2,FAT4,FEZ1,LDB1,LGR6,MANF,METRN,MYEF2,MYO6,NCAM1,NDN,NECTIN1,NELL2,NR2F6,NRCAM,PARD6B,PLEKHG4,S100B,S1PR5,THAP11,TRIM32,ZNF212
GO:BP	apoptotic signaling pathway	GO:0097190	FALSE	4.47E-20	19.3499	606	744	42	78724	BCL2L1,BTK,CAV1,CHEK2,CTSL,CTSV,DDIAS,DDX3X,FCGR2B,HGF,HSPB1,IFI16,IFI27,IFI6,IL2,IL7,INHBB,JAK2,KDM6A,NRG1,PAWR,PHIP,RB1,SIAH2,SLFN12,SP100,STRADB,TNFSF10,WNT16,YBX3,ZNF205,ZNF385B,AKT1,BAG3,DAPK3,DDIT4,MAPK9,NDUFA13,NKX3-1,SCN2A,TRADD,TRIM32
GO:BP	epithelium development	GO:0060429	FALSE	6.72E-20	19.1728	1238	744	58	78724	ARHGAP24,C1GALT1,CALB1,CAV1,CC2D2A,CCDC39,CD151,CSMD1,CXCL10,DHRS9,E2F8,FSTL1,GNAS,HESX1,HGF,HNRNPH3,HSD17B4,IL31RA,JAK2,KANK2,KDM6A,MIB1,NFIB,NRG1,PRLR,PTPRO,SEMA3C,SETSIP,SMAD1,STARD13,STAT1,TDRD7,WNT10A,WNT16,ACADVL,ACVR2B,AJAP1,AKR1C3,AKT1,BFSP1,COL18A1,DLL1,EXPH5,FAT4,FMN1,KRT73,LBH,LDB1,MAFF,MYO6,NKX3-1,NLE1,PHLDB2,SMAD7,SPRED3,ST14,TMEM79,TRADD
GO:BP	regulation of cell adhesion	GO:0030155	FALSE	7.95E-20	19.0994	794	744	47	78724	CAV1,CCR2,CD274,CD86,DUSP3,GBP1,GCNT1,GCNT2,HLA-DMA,HLA-DMB,HLA-DRA,IL15,IL1RN,IL2,IL4I1,IL7,JAK2,LGALS9,NCKAP1L,NRG1,PAWR,PLPP3,PRLR,PTPRO,RIN2,S100A10,SLAMF1,SPTA1,SWAP70,TNFSF13B,ADTRP,AJAP1,AKT1,ASCL2,CCL28,DAB1,DAPK3,DLL1,ERBB2,FMN1,LDB1,MAD2L2,PDE3B,PHLDB2,SKAP1,SMAD7,TBX21
GO:BP	pattern recognition receptor signaling pathway	GO:0002221	FALSE	9.76E-20	19.0107	267	744	30	78724	AIM2,BTK,CASP1,CAV1,CD274,CD40,DDX3X,DDX60,EIF2AK2,FFAR2,IFI35,IFIH1,IRAK3,IRF7,LACC1,MAP2K6,NAIP,OAS1,OAS3,OASL,PIK3AP1,RIOK3,RSAD2,SCIMP,SMPDL3A,TLR10,TLR7,WDFY1,AKT1,TRIM32
GO:BP	negative regulation of viral genome replication	GO:0045071	FALSE	1.16E-19	18.9358	57	744	18	78724	AICDA,APOBEC3A,BST2,EIF2AK2,IFI16,IFIH1,IFIT1,IFIT5,IFITM3,ISG15,MX1,OAS1,OAS2,OAS3,OASL,PLSCR1,RSAD2,APOBEC3H
GO:BP	cellular component assembly	GO:0022607	FALSE	1.18E-19	18.9269	4719	744	120	78724	ADAR,AIM2,AP1S2,AP1S3,ARHGAP24,ARHGAP44,BCL11A,BTK,C9ORF72,CASP1,CAV1,CC2D2A,CCDC39,CD40,CEP162,CFAP54,CHEK2,CLEC7A,DDX3X,DIAPH3,DNAH8,DNM1,DOCK4,DUSP3,EIF2AK2,EIF2S3,EIF2S3B,EMP1,EPB41L3,FECH,FGD4,GBP1,GCH1,GLRX5,GPC4,H4C1,HLA-DMA,HLA-DMB,HLA-DRA,HORMAD1,HPS5,IFIH1,ISG15,JAK2,KANK2,MAP2,MLKL,MS4A1,NASP,NAV3,NCKAP1L,NLGN1,NRG1,OAS1,ODAD4,PAWR,PDLIM5,PKN2,PNPT1,PRLR,PTPRO,RB1,RICTOR,RIOK3,S100A10,…
GO:BP	regulation of immune effector process	GO:0002697	FALSE	1.19E-19	18.9242	401	744	35	78724	BST2,BTK,CALHM6,CCR2,CD1C,CD22,CD274,CD40,CD86,CLEC7A,DDX60,FCGR2B,FFAR2,HLA-DMB,HLA-DRA,IL2,IL4I1,IRAK3,LACC1,LGALS9,NCKAP1L,RSAD2,SCIMP,SERPING1,SLAMF1,TLR7,TRPM4,ASCL2,CD1B,KLRD1,MAD2L2,SH2D1B,SMAD7,SPON2,TBX21
GO:BP	cytoskeleton organization	GO:0007010	FALSE	1.32E-19	18.8809	1529	744	64	78724	ARHGAP44,AUNIP,BST2,C9ORF72,CC2D2A,CCDC39,CCDC68,CHEK2,DIAPH3,DNAH8,EPB41L3,FGD4,FRMD3,GAS2L3,JAK2,KANK2,MAP2,MAP3K20,NAV3,NCKAP1L,NCKAP5,NEXN,NLGN1,ODAD4,PAWR,PDLIM5,PHIP,RICTOR,S100A10,SMTNL1,SNCA,SPTA1,STARD13,SWAP70,TMOD2,TPPP3,TUBB6,UGT8,ARHGEF28,AXIN1,BFSP1,CDK5R1,CYFIP2,DAPK3,EEF2K,FBXW5,FMN1,KIFC2,KRT73,LLGL2,LRGUK,MAD2L2,MYBPH,MYO6,NINL,PARD6B,PHLDB2,PLK3,PRR5,RHOF,TMSB15B,TRIM32,WASH6P,…
GO:BP	cellular component biogenesis	GO:0044085	FALSE	3.55E-19	18.4499	4980	744	123	78724	ADAR,AIM2,AP1S2,AP1S3,ARHGAP24,ARHGAP44,BCL11A,BTK,C9ORF72,CASP1,CAV1,CC2D2A,CCDC39,CD40,CEP162,CFAP54,CHEK2,CLEC7A,DDX3X,DIAPH3,DNAH8,DNM1,DOCK4,DUSP3,EIF2AK2,EIF2S3,EIF2S3B,EMP1,EPB41L3,FECH,FGD4,GBP1,GCH1,GLRX5,GPC4,H4C1,HLA-DMA,HLA-DMB,HLA-DRA,HORMAD1,HPS5,IFIH1,ISG15,JAK2,KANK2,MAP2,MLKL,MS4A1,NASP,NAV3,NCKAP1L,NLGN1,NRG1,NSUN3,OAS1,ODAD4,PAWR,PDLIM5,PKN2,PNPT1,PRLR,PTPRO,RB1,RICTOR,RIOK3,S1…
GO:BP	regulation of leukocyte activation	GO:0002694	FALSE	4.68E-19	18.3302	576	744	40	78724	BANK1,BTK,CAV1,CCR2,CD19,CD22,CD274,CD40,CD86,CLEC7A,DUSP3,FCGR2B,HLA-DMA,HLA-DMB,HLA-DRA,IL15,IL2,IL31RA,IL4I1,IL7,JAK2,LGALS9,MILR1,NCKAP1L,PAWR,PLSCR1,PRLR,SLAMF1,SNCA,SPTA1,TNFSF13B,AKT1,ASCL2,CD320,ERBB2,KLRD1,MAD2L2,NFATC2,SMAD7,TBX21
GO:BP	secretion	GO:0046903	FALSE	5.61E-19	18.2514	992	744	51	78724	ARHGAP44,BTK,C9ORF72,CAV1,CCR2,EXOC3L1,FCGR2B,FFAR2,GNAS,GOLPH3L,IL1RN,INHBB,JAK2,KMO,LGALS9,MAOB,MAP2K6,MILR1,NCKAP1L,NLGN1,NRG1,NSF,NTSR1,OAS2,PRLR,RSAD2,S100A10,SNCA,TRPM4,ACVR2B,ADTRP,CDO1,EXPH5,F2R,GDF9,GNRHR,LLGL2,MRGPRX2,MYO6,NKG7,NKX3-1,PER2,PRF1,PTGDR,PTGES,RAB40B,SMPD3,TACR2,TMEM79,TSPOAP1,WASHC1
GO:BP	adaptive immune response based on somatic recombination of immune receptors built from immunoglobulin superfamily domains	GO:0002460	FALSE	7.09E-19	18.1493	394	744	34	78724	AICDA,BTK,C1QA,C1QC,C5,CCR2,CD19,CD1C,CD274,CD40,CLEC7A,FCGR2B,HLA-DRA,IL2,IL4I1,IRF7,JAK2,NCKAP1L,RSAD2,SANBR,SERPING1,SLAMF1,SWAP70,TNFSF13B,TRPM4,ASCL2,CD1B,GZMM,IL2RB,KLRD1,MAD2L2,PRF1,SMAD7,TBX21
GO:BP	regulation of catabolic process	GO:0009894	FALSE	7.43E-19	18.1289	1040	744	52	78724	BCL2L1,C9ORF72,CAV1,CHEK2,CRYBA1,DCAF12,DRAM2,DTX3L,EIF2AK1,FAP,HGF,HSPB1,IDH1,IFI16,IRAK3,LAMP3,NSF,NUB1,PNPT1,PSME2,SAMD4A,SNCA,SPTLC2,TENT5A,TENT5C,TRIM22,TRIM38,TRIM5,TRIM58,USP25,YBX3,ZBTB20,AKT1,ATP6V0E2,AXIN1,BAG3,CDK5R1,DAPK3,DDA1,DDIT4,FEZ1,MAD2L2,MAPK9,NDUFA13,PDE3B,PFKFB1,PLK3,PRR5L,SH3RF3,SMAD7,TRIM32,WASHC1
GO:BP	generation of neurons	GO:0048699	FALSE	8.18E-19	18.0871	1536	744	63	78724	ADCY6,ANOS1,ARHGAP44,BAHCC1,BCL11A,BEND6,C1QA,C9ORF72,DIAPH3,EPB41L3,FAM151B,IL2,JAK2,KIAA0319,MAP2,MIB1,NCKAP1L,NEXN,NFIB,NLGN1,PDLIM5,PTPRF,PTPRO,RB1,SEMA3C,SLC1A3,SLITRK4,TCF4,UGT8,WNT10A,WNT16,AKT1,AMIGO1,ARHGEF28,ASCL2,CDK5R1,CYFIP2,DAB1,DDIT4,DLL1,EEF2K,ERBB2,FAT4,FEZ1,LDB1,LGR6,MANF,METRN,MYEF2,MYO6,NCAM1,NDN,NECTIN1,NELL2,NR2F6,NRCAM,PARD6B,PLEKHG4,S100B,S1PR5,THAP11,TRIM32,ZNF212
GO:BP	leukocyte activation involved in immune response	GO:0002366	FALSE	1.10E-18	17.9585	316	744	31	78724	AICDA,BTK,CCR2,CD180,CD19,CD1C,CD40,CD86,FCGR2B,HLA-DMB,HLA-DRA,IFI35,IFNE,IL2,LGALS9,MILR1,NCKAP1L,SANBR,SLAMF1,SWAP70,ASCL2,DLL1,MAD2L2,MFNG,MRGPRX2,NKG7,PTGDR,SH2D1B,SMAD7,TBX21,ZFPM1
GO:BP	positive regulation of transport	GO:0051050	FALSE	1.14E-18	17.9438	847	744	47	78724	ATP1B1,BTK,CAV1,CCR2,CD151,CD19,CLEC7A,CXCL10,CXCL9,DENND5B,FCGR2B,FFAR2,GOLPH3L,IL15,INHBB,JAK2,KMO,MAP2,MAP2K6,MIB1,MS4A1,NCKAP1L,NLGN1,NTSR1,S100A10,SGIP1,SNCA,TRPM4,ZNF205,AKAP5,AKT1,AMIGO1,BAG3,DLL1,EEF2K,EXPH5,F2R,FEZ1,IL2RB,NKX3-1,PLK3,PRR5L,PTGES,SMPD3,STAC,TACR2,TUB
GO:BP	export from cell	GO:0140352	FALSE	1.22E-18	17.912	928	744	49	78724	ABCG2,ARHGAP44,ATP1B1,BTK,C9ORF72,CCR2,EXOC3L1,FCGR2B,FFAR2,GNAS,GOLPH3L,IL1RN,INHBB,JAK2,KMO,LGALS9,MAOB,MAP2K6,MILR1,NCKAP1L,NLGN1,NSF,NTSR1,RSAD2,S100A10,SLC38A5,SNCA,TRPM4,ACVR2B,ADTRP,EXPH5,F2R,GDF9,GNRHR,LLGL2,MRGPRX2,NKG7,NKX3-1,PER2,PRF1,PTGDR,PTGES,RAB40B,RGS9,SMPD3,TACR2,TMEM79,TSPOAP1,WASHC1
GO:BP	cell activation involved in immune response	GO:0002263	FALSE	1.60E-18	17.796	320	744	31	78724	AICDA,BTK,CCR2,CD180,CD19,CD1C,CD40,CD86,FCGR2B,HLA-DMB,HLA-DRA,IFI35,IFNE,IL2,LGALS9,MILR1,NCKAP1L,SANBR,SLAMF1,SWAP70,ASCL2,DLL1,MAD2L2,MFNG,MRGPRX2,NKG7,PTGDR,SH2D1B,SMAD7,TBX21,ZFPM1
GO:BP	circulatory system development	GO:0072359	FALSE	1.66E-18	17.7791	1145	744	54	78724	ARHGAP24,C1GALT1,C3AR1,CALCRL,CASP7,CAV1,CC2D2A,CCDC39,CCR2,CD40,COL4A3,CXCL10,CYBB,DDAH1,E2F8,FAP,HHEX,HSPB1,KDM6A,MIB1,NRG1,ODAD4,PDLIM5,PLPP3,RB1,RIN2,SASH1,SAT1,SEMA3C,SMAD1,SOX6,SP100,STARD13,STAT1,WARS1,WNT16,ZFAND5,ACVR2B,ADTRP,AKT1,CHI3L1,CLIC3,COL18A1,DHRS3,DLL1,ERBB2,FAT4,NFATC2,NKX3-1,NRCAM,PDE3B,PDGFD,SMAD7,ZFPM1
GO:BP	cell-cell adhesion	GO:0098609	FALSE	1.69E-18	17.772	976	744	50	78724	CAV1,CCR2,CD274,CD86,COL19A1,DUSP3,GCNT1,GCNT2,GNAS,GPC4,HLA-DMA,HLA-DMB,HLA-DRA,HSPB1,IL15,IL1RN,IL2,IL4I1,IL7,JAK2,LGALS9,NCKAP1L,NEXN,NLGN1,PAWR,PDLIM5,PLPP3,PTPRF,SIGLEC1,SLAMF1,SPTA1,SWAP70,TNFSF13B,ADTRP,AKT1,AMIGO1,ASCL2,CCL28,CDK5R1,COL13A1,CYFIP2,DAB1,ERBB2,FAT4,MAD2L2,NECTIN1,NRCAM,SKAP1,SMAD7,TBX21
GO:BP	macromolecule catabolic process	GO:0009057	FALSE	1.75E-18	17.7568	1417	744	60	78724	BTK,CASP7,CAV1,CHEK2,CTSL,CTSV,DCAF12,DTX3L,FAM8A1,FAP,HERC5,HERC6,HEXB,IFI27,IRAK3,ISG15,LAMP3,MIB1,NSF,NUB1,OAS2,PNPT1,PSME2,SAMD4A,SIAH2,SLFN12,SNCA,TENT5A,TENT5C,TRIM38,TRIM58,UBE2L6,USP25,XRN1,YBX3,AKT1,AXIN1,BAG3,CHI3L1,CTSW,DDA1,FBXL18,FBXW5,GZMB,KLHDC3,MAD2L2,MAPK9,MUS81,NDUFA13,OVGP1,PLK3,PRR5L,SH3RF3,SIAH3,SMAD7,ST14,TBX21,TP53INP2,TRIM32,WDR82
GO:BP	regulation of locomotion	GO:0040012	FALSE	2.30E-18	17.6382	1067	744	52	78724	BST2,C3AR1,C5,CAV1,CCR2,CD151,CD274,CD40,CLEC7A,CXCL10,DOCK4,DUSP3,GCNT1,GCNT2,HGF,HSPB1,JAK2,LGALS9,NAV3,NCKAP1L,NEXN,PKN2,PLPP3,PTPRO,RIN2,SASH1,SEMA3C,SLAMF1,SNCA,SP100,STARD13,SWAP70,ADTRP,AKT1,ASCL2,CCL28,CCL3L3,DAPK3,F2R,LDB1,LGR6,PARD6B,PDGFD,PHLDB2,PRR5L,SMAD7,SMPD3,TACR2,TMSB15B,TRADD,TRIM32,WASHC1
GO:BP	leukocyte proliferation	GO:0070661	FALSE	3.17E-18	17.4996	355	744	32	78724	BCL2L1,BST2,BTK,CCR2,CD151,CD180,CD19,CD22,CD274,CD40,CD86,FCGR2B,HHEX,HLA-DMB,IFNE,IL15,IL2,IL4I1,IL7,JAK2,LGALS9,MS4A1,NCKAP1L,PAWR,PRLR,SLAMF1,SPTA1,TNFSF13B,CCND3,CD320,ERBB2,NFATC2
GO:BP	reproductive process	GO:0022414	FALSE	8.32E-18	17.08	1608	744	63	78724	ADAM28,BCL2L1,CCDC39,CCNA1,CFAP54,CSMD1,DDX3X,E2F8,EAF2,FANCL,FCRL5,FOLR2,FOLR3,GNAS,HESX1,HEXB,HORMAD1,HSD17B4,IDH1,INHBB,LGALS9,LHFPL2,MAP2K6,NASP,PAX5,PNOC,PRLR,RB1,RBBP8,SHOC1,SLC26A8,SMAD1,SMCHD1,STRBP,TDRD1,TDRD7,TNFSF10,TPPP3,TTC21A,YBX3,ZFX,AKR1C3,AKT1,ASCL2,CBS,CCNB3,DHCR24,GDF9,HSPA1L,KLHDC3,LRGUK,MAFF,MUS81,NDN,NELL2,NKX3-1,OVGP1,PTGDR,PTGDR2,SELENOP,ST14,TACR2,TSGA10
GO:BP	immune response-regulating cell surface receptor signaling pathway	GO:0002768	FALSE	1.05E-17	16.9793	341	744	31	78724	BANK1,BLNK,BTK,BTLA,C3AR1,CD19,CD22,CD40,CLEC7A,DUSP3,FCGR2B,FFAR2,FPR3,GBP1,IFI35,MS4A1,NCKAP1L,OAS1,PAWR,PIK3AP1,PLSCR1,SCIMP,WDFY1,CD247,KIR2DL1,KLRD1,MAPK9,NFATC2,SKAP1,TRIM32,TXK
GO:BP	regulation of cell motility	GO:2000145	FALSE	1.20E-17	16.9215	1022	744	50	78724	BST2,C3AR1,C5,CAV1,CCR2,CD151,CD274,CD40,CLEC7A,CXCL10,DOCK4,DUSP3,GCNT1,GCNT2,HGF,HSPB1,JAK2,LGALS9,NAV3,NCKAP1L,NEXN,PKN2,PLPP3,RIN2,SASH1,SEMA3C,SLAMF1,SP100,STARD13,SWAP70,ADTRP,AKT1,ASCL2,CCL28,CCL3L3,DAPK3,F2R,LDB1,LGR6,PARD6B,PDGFD,PHLDB2,PRR5L,SMAD7,SMPD3,TACR2,TMSB15B,TRADD,TRIM32,WASHC1
GO:BP	regulation of cell activation	GO:0050865	FALSE	1.32E-17	16.8779	632	744	40	78724	BANK1,BTK,CAV1,CCR2,CD19,CD22,CD274,CD40,CD86,CLEC7A,DUSP3,FCGR2B,HLA-DMA,HLA-DMB,HLA-DRA,IL15,IL2,IL31RA,IL4I1,IL7,JAK2,LGALS9,MILR1,NCKAP1L,PAWR,PLSCR1,PRLR,SLAMF1,SNCA,SPTA1,TNFSF13B,AKT1,ASCL2,CD320,ERBB2,KLRD1,MAD2L2,NFATC2,SMAD7,TBX21
GO:BP	post-translational protein modification	GO:0043687	FALSE	1.47E-17	16.8319	1027	744	50	78724	BCL11A,CAV1,DCAF12,DDX3X,DTX3L,FANCL,HERC5,HERC6,IFI27,IFIH1,ISG15,JAK2,MARCHF1,MARCHF3,MARCHF8,MIB1,NT5C2,NUB1,PARP12,SASH1,SIAH2,SMC6,TRIM22,TRIM38,TRIM5,TRIM58,TRPM4,UBE2L6,USP18,USP25,AKT1,ARRDC4,AXIN1,CAND2,DDA1,DTX3,FBXW5,KLHDC3,MAD2L2,MAPK9,MED27,MKRN3,PARP16,PER2,RAB40B,RASSF1,SH3RF3,SMAD7,TRIM32,WASHC1
GO:BP	cell-cell signaling	GO:0007267	FALSE	1.65E-17	16.7838	1342	744	57	78724	ARHGAP44,BTK,C1QA,CACNA1A,CACNA1E,CALB1,CCR2,CXCL10,CXCL9,DNM1,EXOC3L1,FCRL2,FFAR2,GNAS,HGF,IL15,IL1RN,IL2,IL7,INHBB,JAK2,KMO,MAOB,MAP2K6,NLGN1,NTSR1,PNOC,SIGLEC6,SLC1A3,SLC8A3,SNCA,SYPL1,TMOD2,TNFSF10,TRPM4,ACVR2B,AKAP5,AKT1,APBA2,CDK5R1,DLL1,F2R,FGFBP2,GAL3ST4,GDF9,GNRHR,GPR176,GRID2IP,MAPK9,NKX3-1,PDE9A,PER2,PTGES,S100B,SMPD3,TACR2,TSPOAP1
GO:BP	cell projection organization	GO:0030030	FALSE	1.70E-17	16.7706	1631	744	63	78724	ADCY6,ANOS1,ARHGAP24,ARHGAP44,BCL11A,C9ORF72,CAV1,CC2D2A,CCDC39,CEP162,CFAP54,DIAPH3,DNAH8,EMP1,EPB41L3,FCGR2B,FGD4,IL2,JAK2,KIAA0319,MAP2,NCKAP1L,NEXN,NFIB,NLGN1,ODAD4,PDLIM5,PKN2,PTPRF,PTPRO,RB1,SEMA3C,SLITRK4,TTC21A,UGT8,AKT1,AMIGO1,ARHGEF28,CDK5R1,CYFIP2,DAB1,DYNC2I1,EEF2K,ERBB2,FAT4,FEZ1,LGR6,LRGUK,MANF,METRN,NCAM1,NDN,NECTIN1,NELL2,NRCAM,PARD6B,PLEKHG4,S100B,TMEM250,TRIM32,TUB,WASHC1,ZNF212
GO:BP	mononuclear cell proliferation	GO:0032943	FALSE	1.71E-17	16.7678	319	744	30	78724	BCL2L1,BTK,CCR2,CD151,CD180,CD19,CD22,CD274,CD40,CD86,FCGR2B,HLA-DMB,IFNE,IL15,IL2,IL4I1,IL7,JAK2,LGALS9,MS4A1,NCKAP1L,PAWR,PRLR,SLAMF1,SPTA1,TNFSF13B,CCND3,CD320,ERBB2,NFATC2
GO:BP	regulation of cell migration	GO:0030334	FALSE	3.04E-17	16.5169	960	744	48	78724	BST2,C3AR1,C5,CAV1,CCR2,CD151,CD274,CD40,CLEC7A,CXCL10,DOCK4,DUSP3,GCNT1,GCNT2,HGF,HSPB1,JAK2,LGALS9,NAV3,NCKAP1L,NEXN,PLPP3,RIN2,SASH1,SEMA3C,SLAMF1,SP100,STARD13,SWAP70,ADTRP,AKT1,ASCL2,CCL28,CCL3L3,DAPK3,F2R,LDB1,LGR6,PARD6B,PDGFD,PHLDB2,PRR5L,SMAD7,SMPD3,TMSB15B,TRADD,TRIM32,WASHC1
GO:BP	regulation of lymphocyte activation	GO:0051249	FALSE	3.24E-17	16.4894	509	744	36	78724	BANK1,BTK,CAV1,CCR2,CD19,CD22,CD274,CD40,CD86,CLEC7A,DUSP3,FCGR2B,HLA-DMA,HLA-DMB,HLA-DRA,IL15,IL2,IL4I1,IL7,JAK2,LGALS9,NCKAP1L,PAWR,PRLR,SLAMF1,SPTA1,TNFSF13B,AKT1,ASCL2,CD320,ERBB2,KLRD1,MAD2L2,NFATC2,SMAD7,TBX21
GO:BP	cellular response to lipid	GO:0071396	FALSE	3.41E-17	16.4674	613	744	39	78724	ADCY6,AICDA,CASP1,CASP7,CD180,CD274,CD40,CD86,CMPK2,CXCL10,CXCL9,FAM210B,FECH,FFAR2,GBP3,GNAS,INHBB,IRAK3,JAK2,KANK2,KDM6A,KMO,MRC1,PLSCR4,SASH1,SCIMP,TRIM5,ADTRP,AKR1C3,AKT1,DDIT4,DGKQ,ESRRA,LBH,NDUFA13,NKX3-1,PRMT2,PTGDR,SPON2
GO:BP	positive regulation of molecular function	GO:0044093	FALSE	4.04E-17	16.3937	884	744	46	78724	AIM2,ARHGAP44,ATP1B1,BCAR3,BTK,CAV1,CCR2,CD40,CLEC7A,CLIC2,DDX3X,DTX3L,EIF2AK2,EVI5,GCH1,GNAS,IRAK3,JAK2,LGALS9,NRG1,PARP9,PLPP3,PLSCR1,PRLR,RB1,S100A10,SASH1,SNCA,SP100,STRADB,TNFSF15,TRIM22,TRIM38,TRIM5,AKAP5,AKT1,ARRDC4,AXIN1,CCND3,CHI3L1,ERBB2,F2R,RHEBL1,STAC,TRADD,TRIM32
GO:BP	regulation of cellular component biogenesis	GO:0044087	FALSE	4.38E-17	16.3581	1011	744	49	78724	ARHGAP24,ARHGAP44,BCL11A,BTK,C9ORF72,CAV1,CHEK2,CLEC7A,DDX3X,DOCK4,DUSP3,EIF2AK2,GPC4,ISG15,KANK2,MAP2,NAV3,NCKAP1L,NLGN1,NRG1,PDLIM5,RB1,RICTOR,RIOK3,S100A10,SLITRK4,SNCA,SPTA1,SWAP70,TMOD2,TPPP3,WARS1,AKT1,AMIGO1,CDK5R1,CYFIP2,DAPK3,EEF2K,FEZ1,FMN1,LDB1,MAD2L2,MAPK9,NECTIN1,PHLDB2,SKAP1,SMPD3,TRIM32,WASHC1
GO:BP	cell cycle	GO:0007049	FALSE	4.47E-17	16.3496	1663	744	63	78724	AICDA,AUNIP,BCL2L1,CCNA1,CDK14,CHEK2,DDIAS,DDX3X,DIAPH3,DTX3L,DUSP3,E2F8,FAP,HGF,HHEX,HORMAD1,KANK2,MAP2K6,MAP3K20,MX2,NFIB,PARP9,PHIP,PKN2,PLSCR1,PNPT1,PRR11,PSME2,RB1,RBBP8,RIOK3,SHOC1,SLC26A8,SMC6,TDRD1,TUBB6,TXLNG,WNT16,AKT1,CCNB3,CCND3,CCNQ,CDK5R1,DAPK3,FBXW5,KIFC2,KLHDC3,LLGL2,MAD2L2,MRGPRX2,MUS81,NAA60,NKX3-1,NLE1,PARD6B,PER2,PLK3,PRMT2,RASSF1,SMPD3,TMEM250,TOM1L2,TRIM32
GO:BP	regulation of catalytic activity	GO:0050790	FALSE	4.59E-17	16.3379	928	744	47	78724	ADAR,ARHGAP44,BCAR3,CAV1,CCR2,CD40,DDX3X,DTX3L,DUSP3,EVI5,FGD4,GCH1,GNAS,HERC5,HHEX,HSPB1,IFIT1,IRAK3,JAK2,NRG1,OAS1,OAS3,PARP9,PLSCR1,PRLR,RASAL2,RB1,S100A10,SASH1,SLC8A3,SNCA,STRADB,TNFSF15,WARS1,AKAP5,AKT1,ARRDC4,AXIN1,CCND3,CDK5R1,CHI3L1,ERBB2,F2R,LDB1,MAD2L2,SMAD7,ZFYVE28
GO:BP	tube development	GO:0035295	FALSE	5.02E-17	16.2995	1101	744	51	78724	ARHGAP24,C1GALT1,C3AR1,CALB1,CALCRL,CAV1,CC2D2A,CCDC39,CCR2,CD40,COL4A3,CSMD1,CXCL10,CYBB,DDAH1,E2F8,FAP,HESX1,HHEX,HSPB1,INHBB,KDM6A,MIB1,NFIB,ODAD4,RB1,RIN2,SASH1,SAT1,SEMA3C,SMAD1,SP100,STARD13,STAT1,WARS1,ACVR2B,ADTRP,AKT1,CHI3L1,CLIC3,COL18A1,DLL1,ERBB2,FAT4,FMN1,NKX3-1,NRCAM,PDE3B,SMAD7,SMPD3,ST14
GO:BP	protein modification by small protein conjugation	GO:0032446	FALSE	6.20E-17	16.2075	853	744	45	78724	BCL11A,CAV1,DCAF12,DDX3X,DTX3L,FANCL,HERC5,HERC6,IFI27,IFIH1,ISG15,MARCHF1,MARCHF3,MARCHF8,MIB1,NT5C2,NUB1,SASH1,SIAH2,SMC6,TRIM22,TRIM38,TRIM5,TRIM58,TRPM4,UBE2L6,AKT1,ARRDC4,AXIN1,CAND2,DDA1,DTX3,FBXW5,KLHDC3,MAD2L2,MAPK9,MED27,MKRN3,PER2,RAB40B,RASSF1,SH3RF3,SMAD7,TRIM32,WASHC1
GO:BP	secretion by cell	GO:0032940	FALSE	6.49E-17	16.1878	854	744	45	78724	ARHGAP44,BTK,C9ORF72,CCR2,EXOC3L1,FCGR2B,FFAR2,GNAS,GOLPH3L,IL1RN,INHBB,JAK2,KMO,LGALS9,MAOB,MAP2K6,MILR1,NCKAP1L,NLGN1,NSF,NTSR1,RSAD2,S100A10,SNCA,TRPM4,ACVR2B,ADTRP,EXPH5,F2R,GDF9,GNRHR,LLGL2,MRGPRX2,NKG7,NKX3-1,PER2,PRF1,PTGDR,PTGES,RAB40B,SMPD3,TACR2,TMEM79,TSPOAP1,WASHC1
GO:BP	plasma membrane bounded cell projection organization	GO:0120036	FALSE	9.41E-17	16.0266	1588	744	61	78724	ADCY6,ANOS1,ARHGAP24,ARHGAP44,BCL11A,C9ORF72,CAV1,CC2D2A,CCDC39,CEP162,CFAP54,DNAH8,EMP1,EPB41L3,FCGR2B,FGD4,IL2,JAK2,KIAA0319,MAP2,NCKAP1L,NEXN,NFIB,NLGN1,ODAD4,PDLIM5,PTPRF,PTPRO,RB1,SEMA3C,SLITRK4,TTC21A,UGT8,AKT1,AMIGO1,ARHGEF28,CDK5R1,CYFIP2,DAB1,DYNC2I1,EEF2K,ERBB2,FAT4,FEZ1,LGR6,LRGUK,MANF,METRN,NCAM1,NDN,NECTIN1,NELL2,NRCAM,PARD6B,PLEKHG4,S100B,TMEM250,TRIM32,TUB,WASHC1,ZNF212
GO:BP	lymphocyte proliferation	GO:0046651	FALSE	9.55E-17	16.0198	311	744	29	78724	BTK,CCR2,CD151,CD180,CD19,CD22,CD274,CD40,CD86,FCGR2B,HLA-DMB,IFNE,IL15,IL2,IL4I1,IL7,JAK2,LGALS9,MS4A1,NCKAP1L,PAWR,PRLR,SLAMF1,SPTA1,TNFSF13B,CCND3,CD320,ERBB2,NFATC2
GO:BP	MAPK cascade	GO:0000165	FALSE	9.66E-17	16.0151	744	744	42	78724	BANK1,BCAR3,CAV1,CD40,CRYBA1,DUSP3,EIF2AK2,FCGR2B,GBP1,GCNT2,HESX1,HGF,IL31RA,IRAK3,JAK2,LGALS9,MAP2K6,MAP3K20,MARCO,NAIP,NRG1,RASGRP3,SASH1,SCIMP,SLAMF1,SMAD1,STRADB,TLR7,TRIM5,VRK2,WNT16,AXIN1,CHI3L1,DUSP2,ERBB2,F2R,LBH,MAPK9,PDGFD,PTPN7,SH3RF3,SPRED3
GO:BP	negative regulation of programmed cell death	GO:0043069	FALSE	1.02E-16	15.9925	905	744	46	78724	ADAR,ANXA5,BCL2L1,CAV1,DDIAS,DDX3X,EIF2AK2,FSTL1,GCH1,HGF,HSPB1,IFI6,IFIT3,IL2,IL31RA,IL7,IRF7,JAK2,KANK2,KDM6A,NAIP,NCKAP1L,NRG1,NTSR1,PHIP,PRLR,RB1,RICTOR,SERPINB2,SIAH2,SNCA,STRADB,WNT16,YBX3,AKT1,BAG3,CBS,DLL1,EEF2K,ERBB2,F2R,IL2RB,PLK3,PRR5,THAP11,TRIM32
GO:BP	endocytosis	GO:0006897	FALSE	1.14E-16	15.9445	709	744	41	78724	BCL2L1,BTK,C9ORF72,CALCRL,CAV1,CCR2,CD151,CD22,CLEC10A,CLEC7A,CRYBA1,CTSL,DNAJC13,DNM1,EIF2AK1,FCGR2B,IL15,LYST,MARCHF3,MARCO,MIB1,MRC1,MSR1,NCKAP1L,NLGN1,NRG1,PLSCR1,RIN2,SGIP1,SIGLEC1,SLAMF1,SNCA,XKR9,DGKQ,DLL1,EEF2K,IL2RB,MYO6,SPON2,SYNJ2,TUB
GO:BP	cell morphogenesis	GO:0000902	FALSE	1.36E-16	15.8675	996	744	48	78724	ANOS1,ARHGAP44,BCL11A,C9ORF72,EPB41L3,FGD4,HEXB,HGF,KIAA0319,MAP2,NCKAP1L,NEXN,NFIB,NLGN1,PALM2AKAP2,PDLIM5,PHIP,PTPRO,RB1,SEMA3C,SLC1A3,SLITRK4,SPTA1,STRADB,UGT8,AMIGO1,ARHGEF28,CDK5R1,COL18A1,CYFIP2,DAB1,DAPK3,EEF2K,ERBB2,FEZ1,LAMC3,LGR6,METRN,NCAM1,NDN,NECTIN1,NELL2,NRCAM,PARD6B,PLEKHG4,S100B,ST14,ZFPM1
GO:BP	mononuclear cell differentiation	GO:1903131	FALSE	1.55E-16	15.8091	534	744	36	78724	AICDA,BLNK,BTK,C1QC,CCR2,CD19,CD86,CTSL,DIAPH3,EIF2AK1,FCGR2B,HHEX,HLA-DRA,IFI16,IFNE,IL15,IL2,IL31RA,IL4I1,IL7,IRF7,LGALS9,MS4A1,NCKAP1L,PAX5,RB1,RSAD2,SLAMF1,TNFSF13B,ASCL2,DLL1,ERBB2,MFNG,SMAD7,TBX21,ZFPM1
GO:BP	negative regulation of apoptotic process	GO:0043066	FALSE	1.59E-16	15.7998	874	744	45	78724	ADAR,ANXA5,BCL2L1,CAV1,DDIAS,DDX3X,EIF2AK2,FSTL1,GCH1,HGF,HSPB1,IFI6,IFIT3,IL2,IL31RA,IL7,IRF7,JAK2,KDM6A,NAIP,NCKAP1L,NRG1,NTSR1,PHIP,PRLR,RB1,RICTOR,SERPINB2,SIAH2,SNCA,STRADB,WNT16,YBX3,AKT1,BAG3,CBS,DLL1,EEF2K,ERBB2,F2R,IL2RB,PLK3,PRR5,THAP11,TRIM32
GO:BP	cellular response to endogenous stimulus	GO:0071495	FALSE	1.65E-16	15.7816	1223	744	53	78724	ADCY6,BCAR3,CAV1,CTSL,DUSP3,FECH,FSTL1,GCNT2,GNAS,HGF,HHEX,HSPB1,INHBB,JAK2,KANK2,KDM6A,PHIP,PRLR,RB1,SMAD1,SOX6,SP100,STAT1,WNT10A,ACVR2B,ADTRP,AKR1C3,AKT1,AXIN1,CYFIP2,DDIT4,DHRS3,DLL1,EEF2K,ERBB2,ESRRA,FAT4,FEZ1,GDF9,GNRHR,LBH,MUS81,NDN,NKX3-1,NR1D2,PDE3B,PDGFD,PRMT2,PTGDR,PTP4A3,SMAD7,SMPD3,SPRED3
GO:BP	intracellular receptor signaling pathway	GO:0030522	FALSE	1.97E-16	15.706	377	744	31	78724	BTK,CAV1,DDX3X,DDX60,EIF2AK2,IFIH1,IRF7,JAK2,KANK2,LACC1,MAP2K6,OAS1,OAS3,OASL,PIK3AP1,RIOK3,RSAD2,SCIMP,SMPDL3A,SP100,TLR7,WDFY1,AKR1C3,AKT1,DHRS3,ESRRA,LBH,NKX3-1,NR1D2,NR2F6,PRMT2
GO:BP	tube morphogenesis	GO:0035239	FALSE	1.97E-16	15.7045	879	744	45	78724	ARHGAP24,C1GALT1,C3AR1,CALCRL,CAV1,CC2D2A,CCDC39,CCR2,CD40,COL4A3,CSMD1,CXCL10,CYBB,DDAH1,E2F8,FAP,HESX1,HHEX,HSPB1,KDM6A,MIB1,NFIB,RIN2,SASH1,SAT1,SMAD1,SP100,STARD13,STAT1,WARS1,ACVR2B,ADTRP,AKT1,CHI3L1,CLIC3,COL18A1,DLL1,ERBB2,FAT4,FMN1,NKX3-1,NRCAM,PDE3B,SMAD7,ST14
GO:BP	regulation of cellular localization	GO:0060341	FALSE	2.69E-16	15.5709	1013	744	48	78724	ARHGAP44,BCL2L1,C9ORF72,CAV1,DNAJC13,DTX3L,FFAR2,GBP1,GNAS,GOLPH3L,GPC4,IFI27,INHBB,JAK2,MAP2,MX2,PARP9,RSAD2,SNCA,SP100,SWAP70,TRIM22,TRIM38,TRIM5,TRIM58,TRPM4,ADTRP,AKAP5,AKT1,BAG3,CD247,CDK5R1,ERBB2,EXPH5,F2R,FEZ1,GZMB,HSPA1L,NKX3-1,PARD6B,PER2,PLK3,PRR5L,PTP4A3,REEP2,SIAH3,STAC,TP53INP2
GO:BP	protein modification by small protein conjugation or removal	GO:0070647	FALSE	3.29E-16	15.4834	975	744	47	78724	BCL11A,CAV1,DCAF12,DDX3X,DTX3L,FANCL,HERC5,HERC6,IFI27,IFIH1,ISG15,MARCHF1,MARCHF3,MARCHF8,MIB1,NT5C2,NUB1,SASH1,SIAH2,SMC6,TRIM22,TRIM38,TRIM5,TRIM58,TRPM4,UBE2L6,USP18,USP25,AKT1,ARRDC4,AXIN1,CAND2,DDA1,DTX3,FBXW5,KLHDC3,MAD2L2,MAPK9,MED27,MKRN3,PER2,RAB40B,RASSF1,SH3RF3,SMAD7,TRIM32,WASHC1
GO:BP	T cell activation	GO:0042110	FALSE	3.35E-16	15.4749	582	744	37	78724	CAV1,CCR2,CD151,CD1C,CD274,CD86,CLEC7A,CTSL,DCAF12,DUSP3,FCGR2B,HLA-DMA,HLA-DMB,HLA-DRA,IFNE,IL15,IL2,IL4I1,IL7,JAK2,LGALS9,NCKAP1L,PAWR,RSAD2,SLAMF1,SPTA1,TNFSF13B,AKT1,ASCL2,CCND3,CD247,ERBB2,KLRF1,NKG7,SMAD7,TBX21,ZFPM1
GO:BP	negative regulation of immune response	GO:0050777	FALSE	3.40E-16	15.4684	198	744	24	78724	ADAR,C9ORF72,CCR2,CD274,FCGR2B,GNAS,IFI16,IL2,IL4I1,IRAK3,ISG15,LGALS9,NCKAP1L,OAS1,OAS3,PARP14,SERPING1,SLAMF1,STAT2,USP18,ASCL2,KLRD1,SMAD7,TBX21
GO:BP	positive regulation of transcription by RNA polymerase II	GO:0045944	FALSE	5.24E-16	15.2809	1256	744	53	78724	BCL11A,CD40,CXCL10,DDX3X,E2F8,EAF2,HELZ2,HEXB,HGF,HHEX,IFI16,IL2,IL4I1,IRF7,IRF9,JAK2,KDM6A,LMO2,MACC1,NFIB,PAX5,PHIP,PLSCR1,RB1,S100A10,SETSIP,SMAD1,SP100,STAT1,STAT2,TCF4,TFEC,TLR7,ZFX,AKT1,ASCL2,DLL1,ESRRA,LDB1,MAFF,MED27,NDN,NFATC2,NKX3-1,NR1D2,SKAP1,TBX21,THAP11,TXK,ZFPM1,ZNF208,ZNF212,ZNF76
GO:BP	production of molecular mediator of immune response	GO:0002440	FALSE	6.36E-16	15.1967	227	744	25	78724	AICDA,BST2,BTK,CALHM6,CCR2,CD22,CD40,CD86,CLEC7A,FCGR2B,FFAR2,IL2,IRAK3,LACC1,RSAD2,SANBR,SCIMP,SLAMF1,SWAP70,TLR7,TRPM4,MAD2L2,SMAD7,SPON2,TBX21
GO:BP	cellular response to biotic stimulus	GO:0071216	FALSE	6.43E-16	15.1915	252	744	26	78724	AICDA,BTK,CASP1,CASP7,CD180,CD274,CD40,CD86,CLEC7A,CMPK2,CXCL10,CXCL9,FCGR2B,GBP3,IRAK3,JAK2,KMO,MRC1,PLSCR4,SASH1,SCIMP,TLR10,TRIM5,AKT1,MUS81,SPON2
GO:BP	regulation of anatomical structure morphogenesis	GO:0022603	FALSE	8.80E-16	15.0556	831	744	43	78724	ARHGAP44,BCL11A,C3AR1,CCR2,CD40,COL4A3,CXCL10,CYBB,DDAH1,EPB41L3,FGD4,HEXB,HGF,HHEX,HSPB1,KIAA0319,MAP2,NLGN1,PALM2AKAP2,PDLIM5,PHIP,SASH1,SMAD1,SP100,SPTA1,STAT1,STAT2,TNFSF13B,WARS1,WNT10A,AJAP1,AMIGO1,CDK5R1,CHI3L1,CLIC3,DAB1,DAPK3,DLL1,EEF2K,ERBB2,METRN,PDE3B,PHLDB2
GO:BP	negative regulation of protein metabolic process	GO:0051248	FALSE	1.05E-15	14.9785	677	744	39	78724	ACO1,ADAR,BANK1,C9ORF72,CAV1,DDX3X,DTX3L,DUSP3,EIF2AK1,EIF2AK2,HGF,HHEX,HSPB1,INHBB,IRAK3,ISG15,LAMP3,MAP3K20,PARP14,PLPP3,RB1,SAMD4A,SLC8A3,SNCA,USP25,WARS1,XRN1,AKT1,AXIN1,DAPK3,DGKQ,GZMB,HINT2,MAD2L2,PARP16,PER2,PRR5L,SMAD7,ZFYVE28
GO:BP	vasculature development	GO:0001944	FALSE	1.49E-15	14.8271	762	744	41	78724	ARHGAP24,C1GALT1,C3AR1,CALCRL,CAV1,CCR2,CD40,COL4A3,CXCL10,CYBB,DDAH1,E2F8,FAP,HHEX,HSPB1,MIB1,PLPP3,RIN2,SASH1,SAT1,SEMA3C,SMAD1,SP100,STARD13,STAT1,WARS1,ZFAND5,ACVR2B,ADTRP,AKT1,CHI3L1,CLIC3,COL18A1,DLL1,ERBB2,NFATC2,NKX3-1,NRCAM,PDE3B,PDGFD,SMAD7
GO:BP	growth	GO:0040007	FALSE	1.63E-15	14.7868	929	744	45	78724	BCL11A,BCL2L1,BST2,C9ORF72,DDX3X,EAF2,GNAS,HESX1,IL2,IL7,KDM6A,KIAA0319,MAP2,NRG1,PDLIM5,PNPT1,PRLR,RASAL2,RB1,RICTOR,SMAD1,YBX3,ZFX,ACVR2B,AKT1,APBA2,BNC2,CYFIP2,DLL1,ERBB2,FMN1,GDF9,LGR6,MAD2L2,MEX3C,NDN,NRCAM,PRMT2,PRR5,S100B,SCGB3A1,SELENOP,SMAD7,SMPD3,TRIM32
GO:BP	peptidyl-amino acid modification	GO:0018193	FALSE	1.65E-15	14.7827	686	744	39	78724	BANK1,BCAR3,BCL11A,BTK,CAV1,CD40,GALNTL6,HGF,IFIH1,IL15,IL2,IL31RA,IL7,JAK2,NRG1,PARP14,PARP9,PLPP3,PRLR,RICTOR,SMC6,SNCA,TPGS2,TRIM38,TRPM4,AKT1,AXIN1,CDK5R1,CHI3L1,DGKQ,EEF2KMT,ERBB2,HINT2,MAD2L2,NAA60,PDGFD,PRMT2,SMAD7,ZFYVE28
GO:BP	positive regulation of cellular component organization	GO:0051130	FALSE	1.66E-15	14.7798	1105	744	49	78724	BCL11A,BTK,CASP7,CAV1,CD151,CLEC7A,CXCL9,DDX3X,DUSP3,FCGR2B,GCH1,IL15,ISG15,MIB1,NAV3,NCKAP1L,NLGN1,NRG1,PHIP,RB1,RICTOR,S100A10,SGIP1,SLITRK4,SNCA,SWAP70,TNFSF10,TPPP3,TRIM58,WARS1,ZNF205,AMIGO1,CDK5R1,DLL1,EEF2K,FEZ1,FMN1,IL2RB,MAD2L2,MAPK9,METRN,NFATC2,PHLDB2,SCGB3A1,SKAP1,SMPD3,TRIM32,TUB,WASHC1
GO:BP	interferon-mediated signaling pathway	GO:0140888	FALSE	1.76E-15	14.7549	109	744	19	78724	ADAR,IFI27,IFIH1,IFITM3,IFNE,IRF7,ISG15,JAK2,OAS1,OAS2,OAS3,PARP14,PARP9,SP100,STAT1,STAT2,USP18,ZBP1,TXK
GO:BP	lipid metabolic process	GO:0006629	FALSE	1.94E-15	14.7125	1391	744	55	78724	ABCG2,ALDH1A1,CAV1,CHEK2,DHRS9,FECH,GK,GLYATL2,HEXB,HSD17B4,HSD17B6,IDH1,IL1RN,LACTB,MTMR11,OSBPL10,OSBPL1A,PIGN,PIP5K1B,PLPP3,PLSCR1,PNPLA4,PRLR,RUBCNL,SDSL,SLC44A1,SMPDL3A,SNCA,SPTLC2,UGT8,ZBTB20,ACADVL,ACOT2,ADTRP,AKR1C3,AKT1,B4GALT4,DGKK,DGKQ,DHCR24,DHRS11,DHRS3,EPHX2,GAL3ST4,HINT2,NR1D2,PAFAH2,PDE3B,PER2,PLCH2,PNPLA7,PTGES,SMPD3,SULT1E1,SYNJ2
GO:BP	protein ubiquitination	GO:0016567	FALSE	1.97E-15	14.7066	768	744	41	78724	CAV1,DCAF12,DDX3X,DTX3L,FANCL,HERC5,HERC6,IFI27,ISG15,MARCHF1,MARCHF3,MARCHF8,MIB1,NT5C2,NUB1,SASH1,SIAH2,TRIM22,TRIM38,TRIM5,TRIM58,UBE2L6,AKT1,ARRDC4,AXIN1,CAND2,DDA1,DTX3,FBXW5,KLHDC3,MAD2L2,MAPK9,MED27,MKRN3,PER2,RAB40B,RASSF1,SH3RF3,SMAD7,TRIM32,WASHC1
GO:BP	regulation of leukocyte proliferation	GO:0070663	FALSE	2.74E-15	14.5624	267	744	26	78724	BCL2L1,BST2,BTK,CCR2,CD22,CD274,CD40,CD86,FCGR2B,HHEX,HLA-DMB,IL15,IL2,IL4I1,IL7,JAK2,LGALS9,NCKAP1L,PAWR,PRLR,SLAMF1,SPTA1,TNFSF13B,CD320,ERBB2,NFATC2
GO:BP	protein catabolic process	GO:0030163	FALSE	2.84E-15	14.5464	1030	744	47	78724	BTK,CASP7,CAV1,CHEK2,CTSL,CTSV,DCAF12,DTX3L,FAM8A1,FAP,HERC5,HERC6,HEXB,IFI27,IRAK3,ISG15,LAMP3,MIB1,NSF,NUB1,PSME2,SIAH2,SNCA,TRIM38,TRIM58,UBE2L6,USP25,AKT1,AXIN1,BAG3,CTSW,DDA1,FBXL18,FBXW5,GZMB,KLHDC3,MAD2L2,MAPK9,NDUFA13,PLK3,SH3RF3,SIAH3,SMAD7,ST14,TBX21,TP53INP2,TRIM32
GO:BP	regulation of adaptive immune response	GO:0002819	FALSE	2.96E-15	14.5287	217	744	24	78724	BTK,CCR2,CD1C,CD274,CD40,CLEC7A,FCGR2B,HLA-DRA,IL2,IL4I1,IRF7,JAK2,NCKAP1L,RSAD2,SLAMF1,TNFSF13B,TRPM4,ASCL2,CD1B,KLRD1,MAD2L2,SKAP1,SMAD7,TBX21
GO:BP	response to nitrogen compound	GO:1901698	FALSE	3.47E-15	14.4602	1080	744	48	78724	AANAT,ADCY6,BCAR3,BCL11A,BCL2L1,CACNA1A,CASP7,CAV1,CD40,CYBB,FAM8A1,FCGR2B,FOLR2,GCNT1,GNAS,IFIH1,IFIT1,IFNE,IL2,INHBB,IRAK3,JAK2,KDM6A,PHIP,PNPT1,RB1,RIOK3,SLC1A3,STAT1,STAT2,TLR7,TNFSF10,TRPM4,USP25,XRN1,ADTRP,AKT1,AMIGO1,CBS,CDK5R1,CDO1,DGKQ,EEF2K,GNRHR,PDE3B,PFKFB1,RGS9,SMPD3
GO:BP	positive regulation of protein metabolic process	GO:0051247	FALSE	3.99E-15	14.3991	1039	744	47	78724	BANK1,BCAR3,CAV1,CD40,CD86,DDX3X,IL15,IL2,IL31RA,JAK2,NRG1,NSF,NUB1,PARP14,PARP9,PAWR,PLPP3,PRLR,RICTOR,S100A10,SAMD4A,SASH1,SNCA,STRADB,TNFSF15,YBX3,ADTRP,AKT1,ARRDC4,AXIN1,CCND3,CHI3L1,CYFIP2,DDA1,DGKQ,ERBB2,LDB1,MAD2L2,MAPK9,NDN,NDUFA13,NKX3-1,PLK3,RASSF1,SH3RF3,SMAD7,TRIM32
GO:BP	response to molecule of bacterial origin	GO:0002237	FALSE	4.16E-15	14.3813	357	744	29	78724	AICDA,BTK,CASP1,CASP7,CD180,CD274,CD40,CD86,CMPK2,CXCL10,CXCL9,FCGR2B,GBP3,GCH1,IRAK3,JAK2,KMO,LGALS9,MAOB,MRC1,PLSCR4,SASH1,SCIMP,SNCA,TLR10,TRIM5,AKT1,F2R,SPON2
GO:BP	positive regulation of cell population proliferation	GO:0008284	FALSE	4.46E-15	14.3507	954	744	45	78724	BCAR3,BCL2L1,BST2,BTK,CALCRL,CCR2,CD274,CD40,CD86,CLEC7A,CXCL10,FOLR2,GCNT2,HLA-DMB,IL15,IL2,IL31RA,IL7,JAK2,LGALS9,NCKAP1L,NRG1,OSMR,PHIP,PRLR,RICTOR,SLAMF1,SPTA1,STAT1,TNFSF13B,TRPM4,AKR1C3,AKT1,CD320,DLL1,ERBB2,F2R,GDF9,LBH,NFATC2,NKX3-1,PDGFD,S100B,SMPD3,TMEM250
GO:BP	negative regulation of gene expression	GO:0010629	FALSE	5.91E-15	14.2285	1680	744	60	78724	ACO1,ADAR,APOBEC3A,BANK1,BST2,BTK,CD22,CD274,CRYBA1,DDX3X,EIF2AK1,EIF2AK2,FCGR2B,GBP1,HELZ2,HGF,IFI16,INHBB,IRAK3,LGALS9,MAP3K20,MSR1,NAV3,NCKAP1L,OAS1,OAS3,PARP14,PARP9,PAWR,PNPT1,PUS10,RB1,SAMD4A,SIGLEC1,SLAMF1,SMAD1,SMCHD1,TDRD1,TDRD7,TENT5A,TENT5C,XAF1,XRN1,YBX3,ZBTB20,AKT1,APOBEC3H,AXIN1,BAHD1,DAPK3,DGKQ,DLL1,GZMB,NKX3-1,PARP16,PHF1,PRR5L,SMAD7,TBX21,ZFPM1
GO:BP	leukocyte differentiation	GO:0002521	FALSE	6.14E-15	14.2119	636	744	37	78724	AICDA,BLNK,BTK,C1QC,CCR2,CD19,CD86,CTSL,DIAPH3,EIF2AK1,FCGR2B,HHEX,HLA-DRA,IFI16,IFNE,IL15,IL2,IL31RA,IL4I1,IL7,IRF7,LGALS9,MS4A1,NCKAP1L,PAX5,RB1,RSAD2,SLAMF1,TNFSF13B,ASCL2,DLL1,ERBB2,MFNG,PRXL2A,SMAD7,TBX21,ZFPM1
GO:BP	response to abiotic stimulus	GO:0009628	FALSE	6.70E-15	14.174	1144	744	49	78724	AANAT,ALAS2,BCL2L1,CALB1,CASP1,CASP7,CAV1,CD40,CHEK2,CXCL10,CYBB,DDAH1,DDX3X,FECH,HSPB1,IFI16,KDM6A,KIAA0319,KMO,MAP3K20,NTSR1,POLK,SCN9A,SLC1A3,SLC8A3,STAT1,STRBP,TFEC,TLR7,YBX3,ACADVL,AKT1,ASCL2,BAG3,CBS,CHI3L1,COL18A1,DDIT4,EEF2K,NKX3-1,NR2F6,PER2,PER3,PLK3,RGS9,SCN2A,STAC,TACR2,TRIM32
GO:BP	regulation of cell-cell adhesion	GO:0022407	FALSE	7.03E-15	14.1533	494	744	33	78724	CAV1,CCR2,CD274,CD86,DUSP3,GCNT1,GCNT2,HLA-DMA,HLA-DMB,HLA-DRA,IL15,IL1RN,IL2,IL4I1,IL7,JAK2,LGALS9,NCKAP1L,PAWR,PLPP3,SLAMF1,SPTA1,SWAP70,TNFSF13B,ADTRP,AKT1,ASCL2,CCL28,ERBB2,MAD2L2,SKAP1,SMAD7,TBX21
GO:BP	proteolysis	GO:0006508	FALSE	7.84E-15	14.1058	1486	744	56	78724	ADAM28,CASP1,CASP7,CAV1,CPVL,CTSE,CTSL,CTSV,DCAF12,DTX3L,FAM8A1,FAP,HERC5,HERC6,HGF,IFI27,ISG15,LACTB,LAMP3,LAP3,MIB1,MMP17,NUB1,PSME2,S100A10,SIAH2,TRIM38,TRIM58,UBE2L6,USP18,USP25,AKT1,AXIN1,CAPN12,CAPN5,CAPN8,CTSW,CYFIP2,DDA1,DHCR24,FBXL18,FBXW5,GZMB,GZMM,KLHDC3,MAPK9,PRSS23,PRSS33,RNPEPL1,SH3RF3,SIAH3,SMAD7,ST14,TBX21,TP53INP2,TRIM32
GO:BP	response to wounding	GO:0009611	FALSE	8.47E-15	14.0722	568	744	35	78724	ANO5,ANXA5,ARHGAP24,CASP7,CAV1,CCR2,CD151,CD40,CLEC7A,ENTPD2,FAP,GNAS,HPS5,HSPB1,INHBB,JAK2,KIAA0319,NFIB,NRG1,PLPP3,PLSCR1,PTPRF,S100A10,SERPINB2,SERPING1,SLC1A3,ADTRP,AJAP1,DGKK,DGKQ,ERBB2,F2R,MAPK9,PAFAH2,PHLDB2
GO:BP	immune response-activating cell surface receptor signaling pathway	GO:0002429	FALSE	1.05E-14	13.9772	310	744	27	78724	BANK1,BLNK,BTK,C3AR1,CD19,CD22,CLEC7A,DUSP3,FCGR2B,FFAR2,FPR3,GBP1,IFI35,MS4A1,NCKAP1L,OAS1,PAWR,PIK3AP1,PLSCR1,SCIMP,WDFY1,CD247,KLRD1,NFATC2,SKAP1,TRIM32,TXK
GO:BP	negative regulation of transcription by RNA polymerase II	GO:0000122	FALSE	1.31E-14	13.8821	938	744	44	78724	BCL11A,BHLHE41,CAV1,E2F8,ETV7,HESX1,HHEX,IFI16,IFI27,IRF7,KANK2,MXI1,PARP9,PAWR,PAX5,RB1,SNCA,SP100,STAT1,TFEC,TRPS1,YBX3,ZBTB20,ZNF205,ACVR2B,ASCL2,CCND3,LDB1,MAD2L2,MAFF,NDN,NFATC2,NKX3-1,NR1D2,NR2F6,PER2,PER3,PLK3,SARNP,SMAD7,TBX21,THAP11,ZBTB45,ZFPM1
GO:BP	blood vessel development	GO:0001568	FALSE	1.48E-14	13.8288	732	744	39	78724	ARHGAP24,C1GALT1,C3AR1,CALCRL,CAV1,CCR2,CD40,COL4A3,CXCL10,CYBB,DDAH1,E2F8,FAP,HHEX,HSPB1,MIB1,PLPP3,RIN2,SASH1,SAT1,SEMA3C,SMAD1,SP100,STARD13,STAT1,WARS1,ACVR2B,ADTRP,AKT1,CHI3L1,CLIC3,COL18A1,DLL1,ERBB2,NKX3-1,NRCAM,PDE3B,PDGFD,SMAD7
GO:BP	response to type I interferon	GO:0034340	FALSE	3.42E-14	13.4656	91	744	17	78724	ADAR,IFI27,IFIH1,IFIT1,IFITM3,IFNE,IRF7,ISG15,MX1,OAS1,OAS2,OAS3,SP100,STAT1,STAT2,USP18,ZBP1
GO:BP	regulation of mononuclear cell proliferation	GO:0032944	FALSE	3.74E-14	13.4266	242	744	24	78724	BCL2L1,BTK,CCR2,CD22,CD274,CD40,CD86,FCGR2B,HLA-DMB,IL15,IL2,IL4I1,IL7,JAK2,LGALS9,NCKAP1L,PAWR,PRLR,SLAMF1,SPTA1,TNFSF13B,CD320,ERBB2,NFATC2
GO:BP	negative regulation of response to external stimulus	GO:0032102	FALSE	3.89E-14	13.4098	388	744	29	78724	ADAR,C5,DUSP3,FAP,FCGR2B,GNAS,HGF,IFI16,IL2,IRAK3,ISG15,KIAA0319,LGALS9,NT5C2,OAS1,OAS3,PARP14,PTPRO,RB1,SERPINB2,SERPING1,STAT2,TRIM38,USP18,ADTRP,AJAP1,KLRD1,NR1D2,PHLDB2
GO:BP	regulation of production of molecular mediator of immune response	GO:0002700	FALSE	4.60E-14	13.3374	194	744	22	78724	BST2,BTK,CALHM6,CCR2,CD22,CD40,CD86,CLEC7A,FCGR2B,FFAR2,IL2,IRAK3,LACC1,RSAD2,SCIMP,SLAMF1,TLR7,TRPM4,MAD2L2,SMAD7,SPON2,TBX21
GO:BP	homeostasis of number of cells	GO:0048872	FALSE	5.98E-14	13.2231	332	744	27	78724	ADAR,AIM2,ALAS2,BTK,CCR2,DIAPH3,FAM210B,FECH,FSTL1,IL2,IL7,ISG15,JAK2,LGALS9,NCKAP1L,RB1,SPTA1,STAT1,TNFSF13B,TRIM58,TSPO2,ZFX,AKT1,F2R,LDB1,NLE1,ZFPM1
GO:BP	nervous system process	GO:0050877	FALSE	6.82E-14	13.1664	1510	744	55	78724	CALB1,CCDC39,CCDC50,CCR2,CFAP54,CLCN1,COL4A3,CRYBA1,CSMD1,DIAPH3,DRAM2,GCH1,GNAS,HEXB,HLA-DRA,NLGN1,NTSR1,ODAD4,OR2I1P,OR2W3,OR52K1,PKHD1L1,PNOC,RTP4,SCN9A,SLC1A3,SLC45A2,SLC8A3,SNCA,SOBP,TMOD2,ZNF354A,AKT1,AXIN1,CA6,COL18A1,DHRS3,F2R,IMPG1,LAMC3,MANF,MRGPRX2,MYO6,NDN,NR2F6,NRCAM,PTGES,REEP2,RGS9,S100B,SCN2A,STAC,TACR2,TUB,ZNF212
GO:BP	establishment of protein localization	GO:0045184	FALSE	7.26E-14	13.1388	1937	744	63	78724	ADAR,AP1S2,AP1S3,ARHGAP44,ARL4A,ATP1B1,CALCRL,CAV1,DNAJC13,DTX3L,FFAR2,GNAS,GOLPH3L,HSPB1,IFI27,IFIT1,IL1RN,INHBB,JAK2,LAMP3,LYST,MSR1,MX2,NASP,NLGN1,NSF,RGPD2,RSAD2,RTP4,SNX22,SP100,STRADB,TRAK2,TRPM4,VPS45,ACVR2B,ADTRP,AKAP5,AKT1,APBA2,ARL4C,ARRDC4,BAG3,CDK5R1,ERBB2,EXPH5,F2R,GZMB,HSPA1L,MYO6,NDUFA13,PER2,PHLDB2,PLK3,PRF1,PRR5L,PTP4A3,RAB40B,REEP2,SIAH3,TACR2,TOM1L2,WASHC1
GO:BP	regulation of response to cytokine stimulus	GO:0060759	FALSE	8.50E-14	13.0707	176	744	21	78724	ADAR,CASP1,CAV1,IFIH1,IL1RN,IL7,IRAK3,IRF7,ISG15,NAIP,OAS1,OAS3,PARP14,PARP9,STAT2,USP18,USP25,VRK2,ZBP1,TRIM32,TXK
GO:BP	cellular response to molecule of bacterial origin	GO:0071219	FALSE	8.88E-14	13.0514	225	744	23	78724	AICDA,CASP1,CASP7,CD180,CD274,CD40,CD86,CMPK2,CXCL10,CXCL9,FCGR2B,GBP3,IRAK3,JAK2,KMO,MRC1,PLSCR4,SASH1,SCIMP,TLR10,TRIM5,AKT1,SPON2
GO:BP	neuron development	GO:0048666	FALSE	1.00E-13	12.9986	1177	744	48	78724	ADCY6,ANOS1,ARHGAP44,BCL11A,C1QA,C9ORF72,EPB41L3,FAM151B,IL2,JAK2,KIAA0319,MAP2,NCKAP1L,NEXN,NFIB,NLGN1,PDLIM5,PTPRF,PTPRO,RB1,SEMA3C,SLC1A3,SLITRK4,UGT8,AKT1,AMIGO1,ARHGEF28,CDK5R1,CYFIP2,DAB1,EEF2K,ERBB2,FAT4,FEZ1,LGR6,MANF,METRN,NCAM1,NDN,NECTIN1,NELL2,NR2F6,NRCAM,PARD6B,PLEKHG4,S100B,TRIM32,ZNF212
GO:BP	response to lipopolysaccharide	GO:0032496	FALSE	1.01E-13	12.9952	339	744	27	78724	AICDA,BTK,CASP1,CASP7,CD180,CD274,CD40,CD86,CMPK2,CXCL10,CXCL9,GBP3,GCH1,IRAK3,JAK2,KMO,LGALS9,MAOB,MRC1,PLSCR4,SASH1,SCIMP,SNCA,TRIM5,AKT1,F2R,SPON2
GO:BP	transmembrane transport	GO:0055085	FALSE	1.08E-13	12.9674	1578	744	56	78724	ABCG2,ANO5,ATP10D,ATP1B1,CACNA1A,CACNA1E,CACNA2D3,CALHM6,CAV1,CCR2,CD19,CLCN1,CLIC2,CXCL10,CXCL9,CYBB,KCNH7,MS4A1,NDUFV3,NLGN1,NTSR1,PNPT1,SCN9A,SESTD1,SLC14A1,SLC16A4,SLC1A3,SLC26A8,SLC38A5,SLC38A9,SLC44A1,SLC45A2,SLC7A7,SLC8A3,SLC9A9,SNCA,TCN2,TRPM4,TSPO2,AKAP5,AKT1,AMIGO1,ATP6V0E2,CLIC3,F2R,KCNQ5,NDUFB8,PER2,PLCH2,PRF1,RGS9,SCN2A,SLC12A1,SLC25A29,SLC25A32,STAC
GO:BP	lymphocyte activation involved in immune response	GO:0002285	FALSE	1.08E-13	12.966	227	744	23	78724	AICDA,CD180,CD19,CD1C,CD40,CD86,FCGR2B,HLA-DMB,HLA-DRA,IFNE,IL2,LGALS9,NCKAP1L,SANBR,SWAP70,ASCL2,DLL1,MAD2L2,MFNG,NKG7,SMAD7,TBX21,ZFPM1
GO:BP	regulation of adaptive immune response based on somatic recombination of immune receptors built from immunoglobulin superfamily domains	GO:0002822	FALSE	1.10E-13	12.9598	202	744	22	78724	BTK,CCR2,CD1C,CD274,CD40,CLEC7A,FCGR2B,HLA-DRA,IL2,IL4I1,JAK2,NCKAP1L,RSAD2,SLAMF1,TNFSF13B,TRPM4,ASCL2,CD1B,KLRD1,MAD2L2,SMAD7,TBX21
GO:BP	response to hormone	GO:0009725	FALSE	1.17E-13	12.9311	907	744	42	78724	AANAT,ADCY6,BCAR3,CAV1,CTSL,CYBB,FECH,GCNT1,GNAS,IDH1,IL1RN,INHBB,JAK2,KANK2,KDM6A,LCN8,MAOB,PHIP,PNPT1,PRLR,RB1,SP100,STAT1,STAT2,TNFSF10,ADTRP,AKR1C3,AKT1,CDO1,DDIT4,DHCR24,DHRS3,EEF2K,ESRRA,GNRHR,LBH,NKX3-1,NR1D2,PDE3B,PFKFB1,PRMT2,PTGDR
GO:BP	regulation of protein localization	GO:0032880	FALSE	1.17E-13	12.9311	907	744	42	78724	ARHGAP44,BCL2L1,C9ORF72,DTX3L,FFAR2,GBP1,GNAS,GOLPH3L,GPC4,IFI27,INHBB,JAK2,MAP2,PARP9,RSAD2,SNCA,SP100,SWAP70,TRIM22,TRIM38,TRIM5,TRIM58,TRPM4,ADTRP,AKAP5,AKT1,BAG3,CD247,CDK5R1,ERBB2,EXPH5,F2R,GZMB,HSPA1L,NKX3-1,PER2,PLK3,PRR5L,PTP4A3,SIAH3,STAC,TP53INP2
GO:BP	regulation of leukocyte mediated immunity	GO:0002703	FALSE	1.25E-13	12.904	255	744	24	78724	BST2,BTK,CALHM6,CCR2,CD1C,CD274,CD40,CLEC7A,FCGR2B,HLA-DRA,IL2,IL4I1,LGALS9,NCKAP1L,RSAD2,SCIMP,SLAMF1,TRPM4,CD1B,KLRD1,MAD2L2,SH2D1B,SMAD7,TBX21
GO:BP	regulation of leukocyte cell-cell adhesion	GO:1903037	FALSE	1.63E-13	12.7871	377	744	28	78724	CAV1,CCR2,CD274,CD86,DUSP3,GCNT1,HLA-DMA,HLA-DMB,HLA-DRA,IL15,IL2,IL4I1,IL7,JAK2,LGALS9,NCKAP1L,PAWR,SLAMF1,SPTA1,TNFSF13B,ADTRP,AKT1,ASCL2,CCL28,ERBB2,SKAP1,SMAD7,TBX21
GO:BP	negative regulation of cell population proliferation	GO:0008285	FALSE	1.76E-13	12.7552	706	744	37	78724	BTK,CAV1,CD274,COL4A3,DDAH1,EAF2,EIF2AK1,EIF2AK2,FAP,FCGR2B,IFI35,IFIT3,IL2,IL4I1,JAK2,KANK2,LGALS9,NFIB,PAWR,RB1,SMAD1,STAT1,WARS1,ASCL2,CCL3L3,COL18A1,DHCR24,DLL1,ERBB2,F2R,NKX3-1,PDE9A,PER2,PTGDR2,PTGES,SMAD7,TRIM32
GO:BP	positive regulation of cell differentiation	GO:0045597	FALSE	2.15E-13	12.6668	879	744	41	78724	BCL11A,BEND6,BTK,CD86,CLEC7A,CXCL9,FAM210B,GCNT2,HGF,HLA-DRA,IL15,IL2,IL4I1,IL7,ISG15,JAK2,LGALS9,MSR1,NCKAP1L,NRG1,RB1,RIN2,SMAD1,SOX6,STAT1,TCF4,TENT5A,TRPM4,ACVR2B,AKT1,AMIGO1,DAB1,EEF2K,MAD2L2,MAPK9,METRN,NRCAM,S100B,SMAD7,SULT1E1,TRIM32
GO:BP	negative regulation of developmental process	GO:0051093	FALSE	2.33E-13	12.6332	925	744	42	78724	BCL11A,BCL2L1,BHLHE41,C1QC,CAV1,CCR2,COL4A3,CXCL10,EAF2,FCGR2B,GNAS,H4C1,HHEX,IL2,KIAA0319,MAP2,MBNL3,MIB1,NFIB,NLGN1,RB1,SMAD1,SOX6,STAT1,TENT5C,TRPM4,YBX3,ASCL2,AXIN1,DAB1,DLL1,ERBB2,LBH,LDB1,MAD2L2,NFATC2,NKX3-1,PDE3B,SMAD7,SPRED3,TBX21,ZFPM1
GO:BP	enzyme-linked receptor protein signaling pathway	GO:0007167	FALSE	2.35E-13	12.6285	970	744	43	78724	BCAR3,BLNK,CAV1,COL4A3,DUSP3,FSTL1,GCNT2,HESX1,HGF,HHEX,HSPB1,IFI6,IL31RA,INHBB,JAK2,KIAA0319,NRG1,PHIP,PRLR,PTPRF,SMAD1,SNCA,ZFAND5,ACVR2B,AKT1,ARHGEF28,AXIN1,CDK5R1,CYFIP2,DDIT4,DLL1,ERBB2,FAT4,GDF9,NDN,NKX3-1,PDGFD,PTP4A3,SMAD7,SMPD3,SPRED3,TRADD,ZFYVE28
GO:BP	cellular response to type I interferon	GO:0071357	FALSE	2.65E-13	12.5766	85	744	16	78724	ADAR,IFI27,IFIH1,IFIT1,IFITM3,IFNE,IRF7,ISG15,OAS1,OAS2,OAS3,SP100,STAT1,STAT2,USP18,ZBP1
GO:BP	regulation of lymphocyte proliferation	GO:0050670	FALSE	2.81E-13	12.5518	237	744	23	78724	BTK,CCR2,CD22,CD274,CD40,CD86,FCGR2B,HLA-DMB,IL15,IL2,IL4I1,IL7,JAK2,LGALS9,NCKAP1L,PAWR,PRLR,SLAMF1,SPTA1,TNFSF13B,CD320,ERBB2,NFATC2
GO:BP	positive regulation of leukocyte proliferation	GO:0070665	FALSE	3.07E-13	12.5133	164	744	20	78724	BCL2L1,BST2,BTK,CCR2,CD274,CD40,CD86,HLA-DMB,IL15,IL2,IL7,JAK2,LGALS9,NCKAP1L,PRLR,SLAMF1,SPTA1,TNFSF13B,CD320,NFATC2
GO:BP	neuron projection development	GO:0031175	FALSE	3.08E-13	12.5117	1023	744	44	78724	ADCY6,ANOS1,ARHGAP44,BCL11A,C9ORF72,EPB41L3,IL2,JAK2,KIAA0319,MAP2,NCKAP1L,NEXN,NFIB,NLGN1,PDLIM5,PTPRF,PTPRO,RB1,SEMA3C,SLITRK4,UGT8,AKT1,AMIGO1,ARHGEF28,CDK5R1,CYFIP2,DAB1,EEF2K,ERBB2,FAT4,FEZ1,LGR6,MANF,METRN,NCAM1,NDN,NECTIN1,NELL2,NRCAM,PARD6B,PLEKHG4,S100B,TRIM32,ZNF212
GO:BP	regulation of cell development	GO:0060284	FALSE	3.37E-13	12.4722	847	744	40	78724	BCL11A,BHLHE41,BTK,C1QC,CCR2,CD86,CLEC7A,FAM210B,FCGR2B,H4C1,HLA-DRA,IL15,IL2,IL4I1,IL7,IRF7,ISG15,KIAA0319,LGALS9,MAP2,NCKAP1L,RB1,S100A10,STAT1,TRIM58,AKT1,AMIGO1,ASCL2,DAB1,DLL1,EEF2K,ERBB2,LDB1,METRN,PER2,PRXL2A,SMAD7,TBX21,TRIM32,ZFPM1
GO:BP	regulation of cytokine-mediated signaling pathway	GO:0001959	FALSE	3.46E-13	12.461	165	744	20	78724	ADAR,CASP1,CAV1,IL1RN,IL7,IRAK3,IRF7,ISG15,NAIP,OAS1,OAS3,PARP14,PARP9,STAT2,USP18,USP25,VRK2,ZBP1,TRIM32,TXK
GO:BP	response to type II interferon	GO:0034341	FALSE	3.67E-13	12.4348	123	744	18	78724	BST2,CASP1,CD40,GBP1,GBP3,GCH1,IFITM3,JAK2,LGALS9,MRC1,NUB1,PARP14,PARP9,SNCA,SP100,STAT1,DAPK3,TXK
GO:BP	carbohydrate derivative metabolic process	GO:1901135	FALSE	3.77E-13	12.424	983	744	43	78724	ADCY6,AICDA,ALDH1A1,ATP1B1,BTK,C1GALT1,CMPK2,CTSL,DSE,GALNT5,GALNTL6,GCNT1,GCNT2,GK,HEXB,IL15,MBD4,NDUFV3,NME4,NT5C2,PAWR,PIGN,UGT8,ZBTB20,AK5,AKR1C3,B4GALT4,CHI3L1,CHST13,DDIT4,GAL3ST4,GALNT12,LRGUK,MGAT4A,NDUFA13,NDUFB8,NME3,OVGP1,PDE9A,PFKFB1,PTGDR,SMPD3,SULT1E1
GO:BP	regulation of inflammatory response	GO:0050727	FALSE	3.90E-13	12.4094	390	744	28	78724	AIM2,BTK,CASP1,CCR2,FCGR2B,FFAR2,GBP1,GBP3,GNAS,HGF,IFI35,IL15,IL2,JAK2,LACC1,NAIP,OSMR,PIK3AP1,RB1,RICTOR,SNCA,TLR7,USP18,ZBP1,NKG7,NR1D2,PTGES,TRADD
GO:BP	organophosphate metabolic process	GO:0019637	FALSE	4.01E-13	12.3973	1077	744	45	78724	ACOT9,ADCY6,ATP1B1,CMPK2,ENTPD2,GK,HEXB,HSD17B4,IDH1,KMO,LACC1,MBD4,MTMR11,NDUFV3,NME4,NT5C2,NTSR1,OSBPL10,PIGN,PIP5K1B,PLPP3,PLSCR1,PUDP,SLC44A1,SMPDL3A,SNCA,SPTLC2,ZBTB20,ACOT2,AK5,DDIT4,DGKK,DGKQ,LRGUK,NDUFA13,NDUFB8,NME3,NUDT13,PDE9A,PFKFB1,PLCH2,PNPLA7,SMPD3,SULT1E1,SYNJ2
GO:BP	positive regulation of mononuclear cell proliferation	GO:0032946	FALSE	5.10E-13	12.2925	146	744	19	78724	BCL2L1,BTK,CCR2,CD274,CD40,CD86,HLA-DMB,IL15,IL2,IL7,JAK2,LGALS9,NCKAP1L,PRLR,SLAMF1,SPTA1,TNFSF13B,CD320,NFATC2
GO:BP	regulation of transferase activity	GO:0051338	FALSE	5.18E-13	12.2856	498	744	31	78724	ADAR,CAV1,CD40,DDX3X,DTX3L,DUSP3,HERC5,HHEX,HSPB1,IRAK3,JAK2,NRG1,PRLR,RB1,SASH1,SLC8A3,SNCA,STRADB,TNFSF15,WARS1,AKT1,ARRDC4,AXIN1,CCND3,CDK5R1,CHI3L1,ERBB2,LDB1,MAD2L2,SMAD7,ZFYVE28
GO:BP	positive regulation of lymphocyte activation	GO:0051251	FALSE	5.34E-13	12.2728	331	744	26	78724	BTK,CAV1,CCR2,CD274,CD40,CD86,CLEC7A,HLA-DMA,HLA-DMB,HLA-DRA,IL15,IL2,IL4I1,IL7,JAK2,LGALS9,NCKAP1L,PRLR,SLAMF1,SPTA1,TNFSF13B,AKT1,CD320,MAD2L2,NFATC2,TBX21
GO:BP	regulation of lymphocyte mediated immunity	GO:0002706	FALSE	6.32E-13	12.1994	194	744	21	78724	BTK,CALHM6,CCR2,CD1C,CD274,CD40,FCGR2B,HLA-DRA,IL2,IL4I1,LGALS9,NCKAP1L,RSAD2,SLAMF1,TRPM4,CD1B,KLRD1,MAD2L2,SH2D1B,SMAD7,TBX21
GO:BP	actin filament-based process	GO:0030029	FALSE	7.80E-13	12.1077	825	744	39	78724	ARHGAP44,BST2,C9ORF72,CAV1,DIAPH3,EPB41L3,FGD4,FRMD3,GAS2L3,JAK2,KANK2,NCKAP1L,PAWR,PDLIM5,RICTOR,S100A10,SCN9A,SMTNL1,SPTA1,STARD13,SWAP70,TMOD2,TRPM4,CDK5R1,CYFIP2,DAPK3,EEF2K,FMN1,LLGL2,MAD2L2,MYBPH,MYO6,PHLDB2,RHOF,SCN2A,TMSB15B,TRIM32,WASH6P,WASHC1
GO:BP	protein transport	GO:0015031	FALSE	8.05E-13	12.0942	1444	744	52	78724	ADAR,AP1S2,AP1S3,ARHGAP44,ARL4A,ATP1B1,CALCRL,CAV1,DNAJC13,DTX3L,FFAR2,GNAS,GOLPH3L,HSPB1,IFI27,IFIT1,IL1RN,INHBB,JAK2,LYST,MSR1,MX2,NASP,NSF,RGPD2,RSAD2,SNX22,SP100,STRADB,TRPM4,VPS45,ACVR2B,ADTRP,AKAP5,AKT1,APBA2,ARL4C,ARRDC4,BAG3,EXPH5,F2R,MYO6,NDUFA13,PER2,PLK3,PRF1,PRR5L,RAB40B,REEP2,TACR2,TOM1L2,WASHC1
GO:BP	cytoplasmic pattern recognition receptor signaling pathway	GO:0002753	FALSE	9.86E-13	12.006	174	744	20	78724	BTK,CAV1,DDX3X,DDX60,EIF2AK2,IFIH1,IRF7,LACC1,MAP2K6,OAS1,OAS3,OASL,PIK3AP1,RIOK3,RSAD2,SCIMP,SMPDL3A,TLR7,WDFY1,AKT1
GO:BP	positive regulation of cell motility	GO:2000147	FALSE	1.09E-12	11.9609	587	744	33	78724	C3AR1,CAV1,CCR2,CD151,CD274,CD40,CLEC7A,CXCL10,DOCK4,GCNT2,HGF,HSPB1,JAK2,LGALS9,NCKAP1L,PLPP3,RIN2,SASH1,SEMA3C,SLAMF1,SWAP70,AKT1,ASCL2,CCL3L3,DAPK3,F2R,LGR6,PDGFD,TACR2,TMSB15B,TRADD,TRIM32,WASHC1
GO:BP	cell junction organization	GO:0034330	FALSE	1.11E-12	11.954	834	744	39	78724	ARHGAP44,C1QA,C1QB,C1QC,CACNA2D3,CAV1,DOCK4,DUSP3,EPB41L3,FCGR2B,GPC4,NLGN1,PDLIM5,PKN2,PTPRF,PTPRO,S100A10,SLC8A3,SLITRK4,SNCA,UGT8,AKT1,AMIGO1,CDK5R1,CYFIP2,DAB1,DAPK3,EEF2K,ERBB2,F2R,FMN1,LDB1,LIM2,NECTIN1,NRCAM,PARD6B,PATJ,PHLDB2,SMAD7
GO:BP	lymphocyte differentiation	GO:0030098	FALSE	1.21E-12	11.9174	442	744	29	78724	AICDA,BLNK,BTK,CCR2,CD19,CD86,CTSL,FCGR2B,HHEX,HLA-DRA,IFNE,IL15,IL2,IL4I1,IL7,LGALS9,MS4A1,NCKAP1L,PAX5,RSAD2,SLAMF1,TNFSF13B,ASCL2,DLL1,ERBB2,MFNG,SMAD7,TBX21,ZFPM1
GO:BP	regulation of apoptotic signaling pathway	GO:2001233	FALSE	1.73E-12	11.7625	380	744	27	78724	BCL2L1,CAV1,CTSL,CTSV,DDIAS,DDX3X,FCGR2B,HGF,HSPB1,IFI6,IL7,INHBB,JAK2,KDM6A,NRG1,PHIP,RB1,SIAH2,SP100,STRADB,TNFSF10,WNT16,YBX3,AKT1,MAPK9,NKX3-1,TRIM32
GO:BP	positive regulation of cell migration	GO:0030335	FALSE	1.82E-12	11.7388	559	744	32	78724	C3AR1,CAV1,CCR2,CD151,CD274,CD40,CLEC7A,CXCL10,DOCK4,GCNT2,HGF,HSPB1,JAK2,LGALS9,NCKAP1L,PLPP3,RIN2,SASH1,SEMA3C,SLAMF1,SWAP70,AKT1,ASCL2,CCL3L3,DAPK3,F2R,LGR6,PDGFD,TMSB15B,TRADD,TRIM32,WASHC1
GO:BP	leukocyte cell-cell adhesion	GO:0007159	FALSE	1.89E-12	11.7231	415	744	28	78724	CAV1,CCR2,CD274,CD86,DUSP3,GCNT1,HLA-DMA,HLA-DMB,HLA-DRA,IL15,IL2,IL4I1,IL7,JAK2,LGALS9,NCKAP1L,PAWR,SLAMF1,SPTA1,TNFSF13B,ADTRP,AKT1,ASCL2,CCL28,ERBB2,SKAP1,SMAD7,TBX21
GO:BP	positive regulation of phosphorus metabolic process	GO:0010562	FALSE	1.92E-12	11.7171	560	744	32	78724	BANK1,BCAR3,CAV1,CD40,DDX3X,IL15,IL2,IL31RA,JAK2,NCKAP1L,NRG1,NTSR1,PARP14,PARP9,PLPP3,PRLR,RICTOR,SASH1,SNCA,STRADB,TNFSF15,ZBTB20,ADTRP,AKT1,AXIN1,CCND3,CHI3L1,DGKQ,ERBB2,MAD2L2,NKX3-1,PFKFB1
GO:BP	positive regulation of phosphate metabolic process	GO:0045937	FALSE	1.92E-12	11.7171	560	744	32	78724	BANK1,BCAR3,CAV1,CD40,DDX3X,IL15,IL2,IL31RA,JAK2,NCKAP1L,NRG1,NTSR1,PARP14,PARP9,PLPP3,PRLR,RICTOR,SASH1,SNCA,STRADB,TNFSF15,ZBTB20,ADTRP,AKT1,AXIN1,CCND3,CHI3L1,DGKQ,ERBB2,MAD2L2,NKX3-1,PFKFB1
GO:BP	cell morphogenesis involved in neuron differentiation	GO:0048667	FALSE	1.96E-12	11.7088	599	744	33	78724	ANOS1,ARHGAP44,BCL11A,C9ORF72,KIAA0319,MAP2,NEXN,NFIB,NLGN1,PDLIM5,PTPRO,RB1,SEMA3C,SLC1A3,SLITRK4,AMIGO1,ARHGEF28,CDK5R1,CYFIP2,DAB1,EEF2K,ERBB2,FEZ1,LGR6,METRN,NCAM1,NDN,NECTIN1,NELL2,NRCAM,PARD6B,PLEKHG4,S100B
GO:BP	positive regulation of cell adhesion	GO:0045785	FALSE	2.19E-12	11.6605	488	744	30	78724	CAV1,CCR2,CD274,CD86,GCNT1,GCNT2,HLA-DMA,HLA-DMB,HLA-DRA,IL15,IL2,IL4I1,IL7,JAK2,LGALS9,NCKAP1L,NRG1,PLPP3,RIN2,S100A10,SLAMF1,SPTA1,TNFSF13B,AKT1,CCL28,ERBB2,FMN1,LDB1,SKAP1,SMAD7
GO:BP	positive regulation of locomotion	GO:0040017	FALSE	2.37E-12	11.6261	603	744	33	78724	C3AR1,CAV1,CCR2,CD151,CD274,CD40,CLEC7A,CXCL10,DOCK4,GCNT2,HGF,HSPB1,JAK2,LGALS9,NCKAP1L,PLPP3,RIN2,SASH1,SEMA3C,SLAMF1,SWAP70,AKT1,ASCL2,CCL3L3,DAPK3,F2R,LGR6,PDGFD,TACR2,TMSB15B,TRADD,TRIM32,WASHC1
GO:BP	monoatomic ion transport	GO:0006811	FALSE	2.61E-12	11.5829	1282	744	48	78724	ANO5,ATP10D,ATP1B1,CACNA1A,CACNA1E,CACNA2D3,CALCRL,CALHM6,CAV1,CCR2,CD19,CLCN1,CLIC2,CXCL10,CXCL9,CYBB,KCNH7,MAOB,MS4A1,NDUFV3,NSF,NTSR1,SCN9A,SESTD1,SLC1A3,SLC26A8,SLC38A5,SLC8A3,SLC9A9,SNCA,TCN2,TRPM4,AKAP5,AKT1,AMIGO1,ATP6V0E2,CLIC3,F2R,KCNQ5,NDUFB8,NECTIN1,NMUR1,PLCH2,RGS9,SCN2A,SLC12A1,STAC,TACR2
GO:BP	regulation of cell cycle	GO:0051726	FALSE	2.68E-12	11.5724	1087	744	44	78724	AICDA,BCL2L1,CDK14,CHEK2,DDIAS,DDX3X,DTX3L,DUSP3,E2F8,FAP,HHEX,HORMAD1,KANK2,MAP2K6,MAP3K20,MX2,PARP9,PHIP,PKN2,PLSCR1,PNPT1,PRR11,PSME2,RB1,RBBP8,SMC6,TXLNG,AKT1,CCND3,CCNQ,DAPK3,FBXW5,MAD2L2,MRGPRX2,MUS81,NKX3-1,NLE1,PER2,PLK3,PRMT2,RASSF1,SMPD3,TOM1L2,TRIM32
GO:BP	negative regulation of cell adhesion	GO:0007162	FALSE	2.90E-12	11.5369	293	744	24	78724	CD274,DUSP3,GBP1,GCNT2,IL1RN,IL2,IL4I1,JAK2,LGALS9,PAWR,PTPRO,SWAP70,ADTRP,AJAP1,AKT1,ASCL2,CCL28,DAB1,ERBB2,MAD2L2,PDE3B,PHLDB2,SMAD7,TBX21
GO:BP	positive regulation of immune effector process	GO:0002699	FALSE	2.97E-12	11.5269	264	744	23	78724	BTK,CCR2,CD1C,CD40,CD86,CLEC7A,DDX60,FFAR2,HLA-DMB,HLA-DRA,IL2,LACC1,LGALS9,RSAD2,SCIMP,SLAMF1,TLR7,CD1B,KLRD1,MAD2L2,SH2D1B,SPON2,TBX21
GO:BP	chemical homeostasis	GO:0048878	FALSE	3.00E-12	11.5234	1043	744	43	78724	ACO1,ADCY6,ALAS2,ATP1B1,CALB1,CAV1,CCR2,CD19,CD40,CLIC2,CSMD1,CXCL10,CXCL9,DDX3X,DMXL1,DMXL2,EIF2AK1,FECH,FFAR2,GLRX5,GNAS,HEXB,LACC1,NTSR1,OAS1,PNPLA4,SLC1A3,SLC45A2,SLC8A3,SLC9A9,SNCA,TLCD4,TRPM4,ZBTB20,AKT1,ATP6V0E2,EPHX2,F2R,GRID2IP,NR1D2,PLCH2,SLC12A1,TSPOAP1
GO:BP	regulation of vesicle-mediated transport	GO:0060627	FALSE	3.01E-12	11.5221	531	744	31	78724	ARHGAP44,BTK,C9ORF72,CAV1,CCR2,CD151,CD22,CLEC7A,DNAJC13,FCGR2B,IL15,LGALS9,MIB1,NCKAP1L,NLGN1,NRG1,NSF,PLSCR1,S100A10,SGIP1,SLAMF1,SNCA,AKAP5,CDK5R1,DGKQ,DLL1,EEF2K,EXPH5,IL2RB,SMPD3,TUB
GO:BP	G protein-coupled receptor signaling pathway	GO:0007186	FALSE	3.21E-12	11.494	1289	744	48	78724	ADCY6,BCAR3,C3AR1,C5,CALCRL,CAV1,CCR2,CCRL2,CXCL10,CXCL9,ENTPD2,FFAR2,FPR3,GNAS,GNB4,GNG10,IL2,JAK2,MARCO,NTSR1,OR2I1P,OR2W3,OR52K1,PNOC,PROKR2,SNCA,TMOD2,ADGRG5,AKAP5,AKR1C3,AKT1,CCL3L3,CDK5R1,DGKQ,F2R,GNRHR,GPR176,LGR6,MRGPRX2,NMUR1,PDE3B,PLCH2,PTGDR,PTGDR2,RGS9,S1PR5,TACR2,TUB
GO:BP	regulation of organelle organization	GO:0033043	FALSE	4.02E-12	11.3955	1148	744	45	78724	ARHGAP44,BCL2L1,BST2,C9ORF72,CHEK2,DIAPH3,GCH1,HGF,HORMAD1,KANK2,MAP2,MAP3K20,NAV3,NCKAP1L,NEXN,NLGN1,PHIP,RB1,RICTOR,S100A10,SLAMF1,SMC6,SNCA,SPTA1,STAT2,SWAP70,TMOD2,TNFSF10,XRN1,ZNF205,AKT1,CDK5R1,CYFIP2,DAPK3,FBXW5,FEZ1,FMN1,MAD2L2,MAPK9,PHLDB2,RHOF,SMPD3,TOM1L2,TRIM32,WASHC1
GO:BP	regulation of secretion	GO:0051046	FALSE	4.55E-12	11.3419	617	744	33	78724	C9ORF72,CCR2,FCGR2B,FFAR2,GNAS,GOLPH3L,INHBB,JAK2,KMO,LGALS9,MAOB,MAP2K6,NCKAP1L,NLGN1,NRG1,NSF,NTSR1,OAS2,RSAD2,S100A10,SNCA,TRPM4,ADTRP,EXPH5,F2R,GDF9,MYO6,NKX3-1,PER2,PTGES,SMPD3,TACR2,TSPOAP1
GO:BP	phosphatidylinositol 3-kinase/protein kinase B signal transduction	GO:0043491	FALSE	4.57E-12	11.3399	299	744	24	78724	AIM2,BANK1,CD19,CD40,CRYBA1,GCNT2,HGF,JAK2,PIK3AP1,PIP5K1B,RICTOR,WNT16,AKR1C3,AKT1,CHI3L1,ERBB2,F2R,NKX3-1,PDE3B,PDGFD,PLK3,PRR5,PRR5L,SMPD3
GO:BP	positive regulation of leukocyte activation	GO:0002696	FALSE	4.85E-12	11.3138	363	744	26	78724	BTK,CAV1,CCR2,CD274,CD40,CD86,CLEC7A,HLA-DMA,HLA-DMB,HLA-DRA,IL15,IL2,IL4I1,IL7,JAK2,LGALS9,NCKAP1L,PRLR,SLAMF1,SPTA1,TNFSF13B,AKT1,CD320,MAD2L2,NFATC2,TBX21
GO:BP	negative regulation of cellular component organization	GO:0051129	FALSE	5.08E-12	11.2942	701	744	35	78724	ADCY6,ARHGAP24,ARHGAP44,BCL11A,BCL2L1,CAV1,CXCL10,DDX3X,DIAPH3,FAP,FCGR2B,HGF,HORMAD1,IRAK3,KANK2,KIAA0319,MAP2,NAV3,NLGN1,PLSCR1,PTPRO,RIOK3,SNCA,SPTA1,SWAP70,TMOD2,XRN1,ADTRP,AKT1,DAB1,FEZ1,MAD2L2,PHLDB2,TOM1L2,TRIM32
GO:BP	cellular response to lipopolysaccharide	GO:0071222	FALSE	5.09E-12	11.293	215	744	21	78724	AICDA,CASP1,CASP7,CD180,CD274,CD40,CD86,CMPK2,CXCL10,CXCL9,GBP3,IRAK3,JAK2,KMO,MRC1,PLSCR4,SASH1,SCIMP,TRIM5,AKT1,SPON2
GO:BP	neuron projection morphogenesis	GO:0048812	FALSE	5.13E-12	11.2896	660	744	34	78724	ANOS1,ARHGAP44,BCL11A,C9ORF72,EPB41L3,KIAA0319,MAP2,NCKAP1L,NEXN,NFIB,NLGN1,PDLIM5,PTPRO,SEMA3C,SLITRK4,UGT8,AMIGO1,ARHGEF28,CDK5R1,CYFIP2,DAB1,EEF2K,ERBB2,FEZ1,LGR6,METRN,NCAM1,NDN,NECTIN1,NELL2,NRCAM,PARD6B,PLEKHG4,S100B
GO:BP	type I interferon-mediated signaling pathway	GO:0060337	FALSE	5.40E-12	11.2679	84	744	15	78724	ADAR,IFI27,IFIH1,IFITM3,IFNE,IRF7,ISG15,OAS1,OAS2,OAS3,SP100,STAT1,STAT2,USP18,ZBP1
GO:BP	wound healing	GO:0042060	FALSE	5.51E-12	11.2586	433	744	28	78724	ANO5,ANXA5,ARHGAP24,CASP7,CAV1,CD151,CD40,CLEC7A,ENTPD2,FAP,GNAS,HPS5,HSPB1,JAK2,NRG1,PLPP3,PLSCR1,S100A10,SERPINB2,SERPING1,ADTRP,AJAP1,DGKK,DGKQ,ERBB2,F2R,PAFAH2,PHLDB2
GO:BP	positive regulation of lymphocyte proliferation	GO:0050671	FALSE	5.62E-12	11.2502	143	744	18	78724	BTK,CCR2,CD274,CD40,CD86,HLA-DMB,IL15,IL2,IL7,JAK2,LGALS9,NCKAP1L,PRLR,SLAMF1,SPTA1,TNFSF13B,CD320,NFATC2
GO:BP	positive regulation of programmed cell death	GO:0043068	FALSE	6.40E-12	11.1936	546	744	31	78724	CASP7,CAV1,CD274,CD40,CLEC7A,CRYBA1,CTSL,CTSV,DDX3X,FAP,GCH1,IFIT2,INHBB,JAK2,LGALS9,MAP2K6,MAP3K20,NTSR1,PAWR,SNCA,TNFSF10,ZBP1,AKR1C3,CDK5R1,DAPK3,MAPK9,NDUFA13,NKX3-1,PRF1,PRMT2,TRADD
GO:BP	angiogenesis	GO:0001525	FALSE	6.73E-12	11.1721	547	744	31	78724	ARHGAP24,C1GALT1,C3AR1,CALCRL,CAV1,CCR2,CD40,COL4A3,CXCL10,CYBB,DDAH1,E2F8,FAP,HHEX,HSPB1,SASH1,SAT1,SMAD1,SP100,STARD13,STAT1,WARS1,ADTRP,AKT1,CHI3L1,CLIC3,COL18A1,DLL1,ERBB2,NRCAM,PDE3B
GO:BP	plasma membrane bounded cell projection morphogenesis	GO:0120039	FALSE	1.03E-11	10.9882	676	744	34	78724	ANOS1,ARHGAP44,BCL11A,C9ORF72,EPB41L3,KIAA0319,MAP2,NCKAP1L,NEXN,NFIB,NLGN1,PDLIM5,PTPRO,SEMA3C,SLITRK4,UGT8,AMIGO1,ARHGEF28,CDK5R1,CYFIP2,DAB1,EEF2K,ERBB2,FEZ1,LGR6,METRN,NCAM1,NDN,NECTIN1,NELL2,NRCAM,PARD6B,PLEKHG4,S100B
GO:BP	blood vessel morphogenesis	GO:0048514	FALSE	1.03E-11	10.9878	635	744	33	78724	ARHGAP24,C1GALT1,C3AR1,CALCRL,CAV1,CCR2,CD40,COL4A3,CXCL10,CYBB,DDAH1,E2F8,FAP,HHEX,HSPB1,RIN2,SASH1,SAT1,SMAD1,SP100,STARD13,STAT1,WARS1,ADTRP,AKT1,CHI3L1,CLIC3,COL18A1,DLL1,ERBB2,NRCAM,PDE3B,SMAD7
GO:BP	cell cycle process	GO:0022402	FALSE	1.06E-11	10.9734	1280	744	47	78724	AICDA,AUNIP,BCL2L1,CCNA1,CDK14,CHEK2,DDX3X,DIAPH3,DTX3L,E2F8,HORMAD1,KANK2,MAP3K20,NFIB,PARP9,PHIP,PKN2,PLSCR1,PSME2,RB1,RBBP8,RIOK3,SHOC1,SMC6,TXLNG,WNT16,AKT1,CCNB3,CCND3,CCNQ,CDK5R1,DAPK3,FBXW5,KIFC2,KLHDC3,LLGL2,MAD2L2,MRGPRX2,MUS81,NAA60,PARD6B,PLK3,PRMT2,RASSF1,SMPD3,TMEM250,TOM1L2
GO:BP	regulation of MAPK cascade	GO:0043408	FALSE	1.12E-11	10.9492	637	744	33	78724	BANK1,BCAR3,CAV1,CD40,CRYBA1,DUSP3,EIF2AK2,FCGR2B,GBP1,GCNT2,HGF,IRAK3,JAK2,LGALS9,MAP2K6,MARCO,NAIP,NRG1,SASH1,SCIMP,SLAMF1,TRIM5,VRK2,WNT16,AXIN1,CHI3L1,DUSP2,ERBB2,F2R,LBH,PDGFD,SH3RF3,SPRED3
GO:BP	B cell proliferation	GO:0042100	FALSE	1.21E-11	10.9188	107	744	16	78724	BTK,CD180,CD19,CD22,CD40,FCGR2B,IFNE,IL2,IL7,MS4A1,NCKAP1L,PAWR,PRLR,TNFSF13B,CD320,NFATC2
GO:BP	embryo development	GO:0009790	FALSE	1.22E-11	10.9138	1135	744	44	78724	BCL2L1,CC2D2A,CCDC39,DIAPH3,E2F8,HESX1,HORMAD1,IL1RN,KDM6A,MAP3K20,MIB1,NASP,PAX5,PLPP3,RBBP8,RICTOR,SEMA3C,SMAD1,SOBP,TDRD1,TDRD7,TENT5C,WNT16,YBX3,ZFAND5,ACVR2B,AKT1,APBA2,ASCL2,AXIN1,CDK5R1,COL18A1,DLL1,DUSP2,DYNC2I1,LDB1,MAFF,MFNG,MYO6,NKX3-1,NLE1,PHLDB2,ST14,ZFPM1
GO:BP	cell projection morphogenesis	GO:0048858	FALSE	1.27E-11	10.8958	681	744	34	78724	ANOS1,ARHGAP44,BCL11A,C9ORF72,EPB41L3,KIAA0319,MAP2,NCKAP1L,NEXN,NFIB,NLGN1,PDLIM5,PTPRO,SEMA3C,SLITRK4,UGT8,AMIGO1,ARHGEF28,CDK5R1,CYFIP2,DAB1,EEF2K,ERBB2,FEZ1,LGR6,METRN,NCAM1,NDN,NECTIN1,NELL2,NRCAM,PARD6B,PLEKHG4,S100B
GO:BP	circulatory system process	GO:0003013	FALSE	1.43E-11	10.8451	602	744	32	78724	ABCG2,ADCY6,ATP1B1,C3AR1,CAV1,CLIC2,COL4A3,CXCL10,DDAH1,DOCK4,GCH1,MAP2K6,NTSR1,PTPRO,SCN9A,SERPING1,SLC1A3,SLC38A5,SLC44A1,SLC8A3,SMTNL1,STAT1,TRPM4,CBS,DLL1,F2R,MANF,PER2,PTP4A3,SCN2A,SMAD7,TACR2
GO:BP	positive regulation of cell activation	GO:0050867	FALSE	1.52E-11	10.8171	381	744	26	78724	BTK,CAV1,CCR2,CD274,CD40,CD86,CLEC7A,HLA-DMA,HLA-DMB,HLA-DRA,IL15,IL2,IL4I1,IL7,JAK2,LGALS9,NCKAP1L,PRLR,SLAMF1,SPTA1,TNFSF13B,AKT1,CD320,MAD2L2,NFATC2,TBX21
GO:BP	actin cytoskeleton organization	GO:0030036	FALSE	1.62E-11	10.7916	729	744	35	78724	ARHGAP44,BST2,C9ORF72,DIAPH3,EPB41L3,FGD4,FRMD3,GAS2L3,JAK2,KANK2,NCKAP1L,PAWR,PDLIM5,RICTOR,S100A10,SMTNL1,SPTA1,STARD13,SWAP70,TMOD2,CDK5R1,CYFIP2,DAPK3,EEF2K,FMN1,LLGL2,MAD2L2,MYBPH,MYO6,PHLDB2,RHOF,TMSB15B,TRIM32,WASH6P,WASHC1
GO:BP	axon development	GO:0061564	FALSE	1.75E-11	10.7569	528	744	30	78724	ANOS1,BCL11A,C9ORF72,JAK2,KIAA0319,MAP2,NEXN,NFIB,PTPRF,PTPRO,SEMA3C,SLITRK4,AMIGO1,ARHGEF28,CDK5R1,CYFIP2,DAB1,ERBB2,FEZ1,LGR6,METRN,NCAM1,NDN,NECTIN1,NELL2,NRCAM,PARD6B,PLEKHG4,S100B,TRIM32
GO:BP	membrane organization	GO:0061024	FALSE	1.94E-11	10.7115	821	744	37	78724	ANO5,ATP10D,ATP1B1,BCL2L1,CASP7,CAV1,CTSL,DIAPH3,DNM1,EPB41L3,FCGR2B,FOLR2,FOLR3,GOLPH3L,MARCO,MSR1,NCKAP1L,NLGN1,NSF,PLSCR1,PLSCR4,RTP4,RUBCNL,S100A10,SAMD9,SLAMF1,SNCA,SPTA1,XKR9,ZNF205,AKT1,DHCR24,FAT4,NDUFA13,NRCAM,REEP2,SYNJ2
GO:BP	regulation of B cell activation	GO:0050864	FALSE	2.54E-11	10.5948	133	744	17	78724	BANK1,BTK,CD19,CD22,CD40,FCGR2B,IL2,IL4I1,IL7,NCKAP1L,PAWR,PRLR,TNFSF13B,CD320,MAD2L2,NFATC2,TBX21
GO:BP	regulation of kinase activity	GO:0043549	FALSE	3.70E-11	10.4315	431	744	27	78724	ADAR,CAV1,CD40,DDX3X,DUSP3,HERC5,HHEX,HSPB1,IRAK3,JAK2,NRG1,PRLR,RB1,SASH1,SLC8A3,SNCA,STRADB,TNFSF15,WARS1,AKT1,AXIN1,CCND3,CDK5R1,CHI3L1,ERBB2,LDB1,ZFYVE28
GO:BP	positive regulation of phosphorylation	GO:0042327	FALSE	3.92E-11	10.407	506	744	29	78724	BANK1,BCAR3,CAV1,CD40,DDX3X,IL15,IL2,IL31RA,JAK2,NCKAP1L,NRG1,PARP14,PARP9,PLPP3,PRLR,RICTOR,SASH1,SNCA,STRADB,TNFSF15,ADTRP,AKT1,AXIN1,CCND3,CHI3L1,DGKQ,ERBB2,MAD2L2,NKX3-1
GO:BP	regulation of autophagy	GO:0010506	FALSE	5.20E-11	10.2842	367	744	25	78724	BCL2L1,C9ORF72,CRYBA1,DCAF12,DRAM2,EIF2AK1,HGF,HSPB1,IFI16,LAMP3,SNCA,SPTLC2,TRIM22,TRIM38,TRIM5,TRIM58,AKT1,ATP6V0E2,BAG3,CDK5R1,DAPK3,FEZ1,PLK3,TRIM32,WASHC1
GO:BP	regulation of protein kinase activity	GO:0045859	FALSE	5.35E-11	10.2714	402	744	26	78724	ADAR,CAV1,CD40,DDX3X,DUSP3,HERC5,HHEX,HSPB1,IRAK3,JAK2,NRG1,PRLR,RB1,SASH1,SLC8A3,SNCA,STRADB,TNFSF15,WARS1,AKT1,AXIN1,CCND3,CDK5R1,CHI3L1,ERBB2,ZFYVE28
GO:BP	negative regulation of molecular function	GO:0044092	FALSE	5.85E-11	10.2332	553	744	30	78724	ADAR,AIM2,CAV1,CCR2,CLIC2,DTX3L,DUSP3,HHEX,HSPB1,IFI16,IFIT1,IFIT2,IRAK3,JAK2,MAP2,PARP9,PTPRF,RB1,SLC8A3,SNCA,SP100,WARS1,AKAP5,AKT1,MAD2L2,PER2,PRMT2,SMAD7,ZFPM1,ZFYVE28
GO:BP	animal organ morphogenesis	GO:0009887	FALSE	6.36E-11	10.1962	1042	744	41	78724	BCAR3,CALB1,CAV1,CCDC39,CSMD1,ETV7,GCNT1,HESX1,HGF,IL7,KDM6A,MIB1,NFIB,NRG1,PAX5,SEMA3C,SMTNL1,SOBP,SOX6,STAT1,TDRD7,WNT10A,WNT16,ZFAND5,ACVR2B,AJAP1,CBS,COL13A1,COL18A1,DHRS3,DLL1,DYNC2I1,FAT4,FMN1,MYO6,NECTIN1,NKX3-1,NLE1,SMAD7,SMPD3,ZFPM1
GO:BP	positive regulation of protein modification process	GO:0031401	FALSE	6.71E-11	10.1736	637	744	32	78724	BANK1,BCAR3,CAV1,CD40,DDX3X,IL15,IL2,IL31RA,JAK2,NRG1,PARP14,PARP9,PLPP3,PRLR,RICTOR,SASH1,SNCA,STRADB,TNFSF15,ADTRP,AKT1,ARRDC4,AXIN1,CCND3,CHI3L1,DGKQ,ERBB2,MAD2L2,MAPK9,NDN,NKX3-1,RASSF1
GO:BP	monoatomic ion transmembrane transport	GO:0034220	FALSE	7.67E-11	10.1149	1048	744	41	78724	ANO5,ATP10D,ATP1B1,CACNA1A,CACNA1E,CACNA2D3,CALHM6,CAV1,CCR2,CD19,CLCN1,CLIC2,CXCL10,CXCL9,CYBB,KCNH7,MS4A1,NDUFV3,NTSR1,SCN9A,SESTD1,SLC1A3,SLC26A8,SLC38A5,SLC8A3,SLC9A9,SNCA,TCN2,TRPM4,AKAP5,AMIGO1,ATP6V0E2,CLIC3,F2R,KCNQ5,NDUFB8,PLCH2,RGS9,SCN2A,SLC12A1,STAC
GO:BP	supramolecular fiber organization	GO:0097435	FALSE	8.25E-11	10.0835	861	744	37	78724	C9ORF72,DIAPH3,GAS2L3,JAK2,KANK2,MAP2,NAV3,NCKAP1L,NCKAP5,PAWR,RB1,RICTOR,S100A10,SIAH2,SNCA,SPTA1,SWAP70,TMOD2,TPPP3,AXIN1,BFSP1,CDK5R1,COL18A1,CYFIP2,DAPK3,EEF2K,FMN1,KRT73,MAD2L2,MYBPH,MYO6,PHLDB2,PLK3,RHOF,TMSB15B,WASH6P,WASHC1
GO:BP	positive regulation of protein phosphorylation	GO:0001934	FALSE	8.31E-11	10.0804	483	744	28	78724	BANK1,BCAR3,CAV1,CD40,DDX3X,IL15,IL2,IL31RA,JAK2,NRG1,PARP14,PARP9,PLPP3,PRLR,RICTOR,SASH1,SNCA,STRADB,TNFSF15,ADTRP,AKT1,AXIN1,CCND3,CHI3L1,DGKQ,ERBB2,MAD2L2,NKX3-1
GO:BP	negative regulation of response to biotic stimulus	GO:0002832	FALSE	8.80E-11	10.0553	121	744	16	78724	ADAR,CD274,IFI16,IL4I1,IRAK3,ISG15,LGALS9,NT5C2,OAS1,OAS3,PARP14,SERPING1,STAT2,TRIM38,USP18,KLRD1
GO:BP	regulation of secretion by cell	GO:1903530	FALSE	9.30E-11	10.0317	563	744	30	78724	C9ORF72,CCR2,FCGR2B,FFAR2,GNAS,GOLPH3L,INHBB,JAK2,KMO,LGALS9,MAOB,MAP2K6,NCKAP1L,NLGN1,NSF,NTSR1,RSAD2,S100A10,SNCA,TRPM4,ADTRP,EXPH5,F2R,GDF9,NKX3-1,PER2,PTGES,SMPD3,TACR2,TSPOAP1
GO:BP	cytokine production involved in immune response	GO:0002367	FALSE	1.14E-10	9.94134	123	744	16	78724	BST2,BTK,CALHM6,CCR2,CLEC7A,FFAR2,IRAK3,LACC1,RSAD2,SCIMP,SLAMF1,TLR7,TRPM4,SMAD7,SPON2,TBX21
GO:BP	regulation of cytokine production involved in immune response	GO:0002718	FALSE	1.14E-10	9.94134	123	744	16	78724	BST2,BTK,CALHM6,CCR2,CLEC7A,FFAR2,IRAK3,LACC1,RSAD2,SCIMP,SLAMF1,TLR7,TRPM4,SMAD7,SPON2,TBX21
GO:BP	positive regulation of apoptotic process	GO:0043065	FALSE	1.15E-10	9.94023	528	744	29	78724	CASP7,CAV1,CD274,CD40,CRYBA1,CTSL,CTSV,DDX3X,FAP,GCH1,IFIT2,INHBB,JAK2,LGALS9,MAP2K6,MAP3K20,NTSR1,PAWR,SNCA,TNFSF10,ZBP1,AKR1C3,CDK5R1,DAPK3,MAPK9,NDUFA13,NKX3-1,PRMT2,TRADD
GO:BP	tumor necrosis factor superfamily cytokine production	GO:0071706	FALSE	1.33E-10	9.87656	171	744	18	78724	BTK,CCR2,CD274,CD86,CLEC7A,CYBB,FCGR2B,HSPB1,IFIH1,IRAK3,JAK2,LGALS9,OAS1,OAS2,OAS3,SLAMF1,ZBTB20,SPON2
GO:BP	regulation of tumor necrosis factor superfamily cytokine production	GO:1903555	FALSE	1.33E-10	9.87656	171	744	18	78724	BTK,CCR2,CD274,CD86,CLEC7A,CYBB,FCGR2B,HSPB1,IFIH1,IRAK3,JAK2,LGALS9,OAS1,OAS2,OAS3,SLAMF1,ZBTB20,SPON2
GO:BP	negative regulation of protein modification process	GO:0031400	FALSE	1.38E-10	9.85914	349	744	24	78724	ADAR,C9ORF72,CAV1,DTX3L,DUSP3,HGF,HHEX,HSPB1,IRAK3,ISG15,PARP14,PLPP3,RB1,SLC8A3,SNCA,WARS1,AKT1,DGKQ,HINT2,MAD2L2,PER2,PRR5L,SMAD7,ZFYVE28
GO:BP	proteolysis involved in protein catabolic process	GO:0051603	FALSE	1.45E-10	9.83917	786	744	35	78724	CAV1,CTSL,CTSV,DCAF12,DTX3L,FAM8A1,FAP,HERC5,HERC6,IFI27,ISG15,LAMP3,MIB1,NUB1,PSME2,SIAH2,TRIM38,TRIM58,UBE2L6,USP25,AKT1,AXIN1,CTSW,DDA1,FBXL18,FBXW5,GZMB,KLHDC3,MAPK9,SH3RF3,SIAH3,SMAD7,TBX21,TP53INP2,TRIM32
GO:BP	negative regulation of immune effector process	GO:0002698	FALSE	1.68E-10	9.77425	126	744	16	78724	BST2,CCR2,CD22,CD274,FCGR2B,IL2,IL4I1,IRAK3,LGALS9,NCKAP1L,SERPING1,SLAMF1,ASCL2,KLRD1,SMAD7,TBX21
GO:BP	negative regulation of intracellular signal transduction	GO:1902532	FALSE	1.90E-10	9.72121	662	744	32	78724	AIM2,ARHGAP24,ARHGAP44,BANK1,BCL2L1,CAV1,CD22,CRYBA1,DDIAS,DDX3X,DUSP3,GBP1,HSPB1,IFI35,IRAK3,KANK2,KDM6A,MAP3K20,RIOK3,SMPDL3A,STAT1,YBX3,AKT1,DDIT4,DHRS3,DUSP2,LBH,PLK3,SMAD7,SMPD3,SPRED3,TRIM32
GO:BP	regulation of hemopoiesis	GO:1903706	FALSE	1.94E-10	9.71147	425	744	26	78724	BTK,C1QC,CCR2,CD86,FAM210B,FCGR2B,H4C1,HLA-DRA,IL15,IL2,IL4I1,IL7,IRF7,ISG15,LGALS9,NCKAP1L,RB1,STAT1,ASCL2,DLL1,ERBB2,LDB1,PRXL2A,SMAD7,TBX21,ZFPM1
GO:BP	axonogenesis	GO:0007409	FALSE	2.05E-10	9.68889	463	744	27	78724	ANOS1,BCL11A,C9ORF72,KIAA0319,MAP2,NEXN,NFIB,PTPRO,SEMA3C,SLITRK4,AMIGO1,ARHGEF28,CDK5R1,CYFIP2,DAB1,ERBB2,FEZ1,LGR6,METRN,NCAM1,NDN,NECTIN1,NELL2,NRCAM,PARD6B,PLEKHG4,S100B
GO:BP	negative regulation of cytokine production	GO:0001818	FALSE	2.40E-10	9.62018	292	744	22	78724	BANK1,BST2,BTK,CD274,CRYBA1,FCGR2B,GBP1,HGF,INHBB,IRAK3,LGALS9,NAV3,NCKAP1L,OAS1,OAS3,SIGLEC1,SLAMF1,XAF1,DLL1,SMAD7,TBX21,ZFPM1
GO:BP	chemotaxis	GO:0006935	FALSE	2.51E-10	9.60041	467	744	27	78724	ANOS1,C3AR1,C5,CCR2,CCRL2,CXCL10,CXCL9,DOCK4,DUSP3,FFAR2,FPR3,HGF,HSPB1,LGALS9,LYST,NCKAP1L,NRG1,PTPRO,SEMA3C,SLAMF1,SWAP70,TRPM4,CCL28,CCL3L3,LGR6,PDGFD,PTGDR2
GO:BP	positive regulation of tumor necrosis factor superfamily cytokine production	GO:1903557	FALSE	2.59E-10	9.58682	108	744	15	78724	BTK,CCR2,CD86,CLEC7A,CYBB,FCGR2B,HSPB1,IFIH1,JAK2,LGALS9,OAS1,OAS2,OAS3,ZBTB20,SPON2
GO:BP	positive regulation of inflammatory response	GO:0050729	FALSE	2.67E-10	9.57347	153	744	17	78724	AIM2,BTK,CASP1,CCR2,FFAR2,GBP1,GBP3,IFI35,IL15,IL2,NAIP,OSMR,SNCA,TLR7,ZBP1,NKG7,TRADD
GO:BP	taxis	GO:0042330	FALSE	2.78E-10	9.55652	469	744	27	78724	ANOS1,C3AR1,C5,CCR2,CCRL2,CXCL10,CXCL9,DOCK4,DUSP3,FFAR2,FPR3,HGF,HSPB1,LGALS9,LYST,NCKAP1L,NRG1,PTPRO,SEMA3C,SLAMF1,SWAP70,TRPM4,CCL28,CCL3L3,LGR6,PDGFD,PTGDR2
GO:BP	regulation of phosphatidylinositol 3-kinase/protein kinase B signal transduction	GO:0051896	FALSE	2.78E-10	9.55624	263	744	21	78724	AIM2,BANK1,CD19,CRYBA1,GCNT2,HGF,JAK2,PIK3AP1,PIP5K1B,RICTOR,WNT16,AKR1C3,CHI3L1,F2R,NKX3-1,PDE3B,PDGFD,PLK3,PRR5,PRR5L,SMPD3
GO:BP	positive regulation of interferon-beta production	GO:0032728	FALSE	2.93E-10	9.53385	42	744	11	78724	DDX3X,IFIH1,IRF7,ISG15,OAS1,OAS2,OAS3,RIOK3,TLR7,ZBTB20,ARRDC4
GO:BP	positive regulation of cell-cell adhesion	GO:0022409	FALSE	3.03E-10	9.51788	328	744	23	78724	CAV1,CCR2,CD274,CD86,GCNT1,GCNT2,HLA-DMA,HLA-DMB,HLA-DRA,IL15,IL2,IL4I1,IL7,JAK2,LGALS9,NCKAP1L,PLPP3,SLAMF1,SPTA1,TNFSF13B,AKT1,SKAP1,SMAD7
GO:BP	T cell mediated immunity	GO:0002456	FALSE	3.97E-10	9.40139	133	744	16	78724	CCR2,CD1C,CD274,FCGR2B,HLA-DRA,IL4I1,NCKAP1L,RSAD2,SLAMF1,TRPM4,CD1B,GZMM,KLRD1,PRF1,SMAD7,TBX21
GO:BP	process utilizing autophagic mechanism	GO:0061919	FALSE	4.19E-10	9.37829	597	744	30	78724	BCL2L1,C9ORF72,CHEK2,CRYBA1,DCAF12,DIAPH3,DRAM2,EIF2AK1,HGF,HSPB1,IFI16,LAMP3,RUBCNL,SNCA,SPTLC2,TMEM150B,TRIM22,TRIM38,TRIM5,TRIM58,AKT1,ATP6V0E2,BAG3,CDK5R1,DAPK3,FEZ1,PLK3,TP53INP2,TRIM32,WASHC1
GO:BP	autophagy	GO:0006914	FALSE	4.19E-10	9.37829	597	744	30	78724	BCL2L1,C9ORF72,CHEK2,CRYBA1,DCAF12,DIAPH3,DRAM2,EIF2AK1,HGF,HSPB1,IFI16,LAMP3,RUBCNL,SNCA,SPTLC2,TMEM150B,TRIM22,TRIM38,TRIM5,TRIM58,AKT1,ATP6V0E2,BAG3,CDK5R1,DAPK3,FEZ1,PLK3,TP53INP2,TRIM32,WASHC1
GO:BP	oxoacid metabolic process	GO:0043436	FALSE	4.19E-10	9.3774	909	744	37	78724	ACO1,ALDH1A1,CASP1,CAV1,DDAH1,DHRS9,GLYATL2,HNMT,HSD17B4,IDH1,IL4I1,KMO,NAIP,OSBPL1A,SDSL,SLC1A3,SLC45A2,SLC7A7,SNCA,ZBTB20,ACADVL,ACOT2,ADTRP,AKR1C3,AKT1,CARNS1,CBS,CDO1,DDIT4,FPGS,MGAT4A,PER2,PFKFB1,PTGES,RIMKLA,SLC25A32,SULT1E1
GO:BP	blood circulation	GO:0008015	FALSE	4.57E-10	9.33999	518	744	28	78724	ADCY6,ATP1B1,C3AR1,CAV1,CLIC2,COL4A3,CXCL10,DDAH1,DOCK4,GCH1,MAP2K6,NTSR1,PTPRO,SCN9A,SERPING1,SLC8A3,SMTNL1,STAT1,TRPM4,CBS,DLL1,F2R,MANF,PER2,PTP4A3,SCN2A,SMAD7,TACR2
GO:BP	organic acid metabolic process	GO:0006082	FALSE	5.10E-10	9.29253	915	744	37	78724	ACO1,ALDH1A1,CASP1,CAV1,DDAH1,DHRS9,GLYATL2,HNMT,HSD17B4,IDH1,IL4I1,KMO,NAIP,OSBPL1A,SDSL,SLC1A3,SLC45A2,SLC7A7,SNCA,ZBTB20,ACADVL,ACOT2,ADTRP,AKR1C3,AKT1,CARNS1,CBS,CDO1,DDIT4,FPGS,MGAT4A,PER2,PFKFB1,PTGES,RIMKLA,SLC25A32,SULT1E1
GO:BP	cellular response to nitrogen compound	GO:1901699	FALSE	5.36E-10	9.27097	645	744	31	78724	AANAT,ADCY6,BCAR3,BCL11A,BCL2L1,CACNA1A,CASP7,CAV1,CYBB,FCGR2B,FOLR2,GNAS,IFIH1,IFIT1,INHBB,JAK2,KDM6A,PHIP,RB1,RIOK3,SLC1A3,STAT1,TRPM4,XRN1,AKT1,AMIGO1,CDK5R1,EEF2K,GNRHR,PDE3B,RGS9
GO:BP	monoatomic cation homeostasis	GO:0055080	FALSE	6.12E-10	9.21298	606	744	30	78724	ACO1,ALAS2,ATP1B1,CALB1,CAV1,CCR2,CD19,CD40,CLIC2,CXCL10,CXCL9,DMXL1,DMXL2,EIF2AK1,FECH,GLRX5,HEXB,LACC1,NTSR1,SLC1A3,SLC45A2,SLC8A3,SLC9A9,SNCA,ATP6V0E2,F2R,GRID2IP,PLCH2,SLC12A1,TSPOAP1
GO:BP	regulation of interferon-beta production	GO:0032648	FALSE	6.20E-10	9.20776	59	744	12	78724	DDX3X,IFIH1,IRF7,ISG15,OAS1,OAS2,OAS3,RIOK3,TLR7,TRIM38,ZBTB20,ARRDC4
GO:BP	interferon-beta production	GO:0032608	FALSE	6.20E-10	9.20776	59	744	12	78724	DDX3X,IFIH1,IRF7,ISG15,OAS1,OAS2,OAS3,RIOK3,TLR7,TRIM38,ZBTB20,ARRDC4
GO:BP	cellular homeostasis	GO:0019725	FALSE	8.17E-10	9.08789	835	744	35	78724	ACO1,AIM2,ALAS2,ATP1B1,CALB1,CAV1,CCR2,CD19,CD40,CLIC2,CXCL10,CXCL9,DMXL1,DMXL2,FGGY,GLRX5,HEXB,LACC1,NTSR1,SLC1A3,SLC45A2,SLC8A3,SLC9A9,SNCA,TRPM4,ZBTB20,ATP6V0E2,BAG3,F2R,GRID2IP,NELL2,PLCH2,SLC12A1,TRIM32,TSPOAP1
GO:BP	epithelial cell differentiation	GO:0030855	FALSE	8.93E-10	9.04898	746	744	33	78724	C1GALT1,CAV1,DHRS9,E2F8,FSTL1,HNRNPH3,HSD17B4,IL31RA,NFIB,NRG1,PRLR,PTPRO,SETSIP,STAT1,TDRD7,WNT16,ACADVL,ACVR2B,AJAP1,AKR1C3,AKT1,BFSP1,COL18A1,DLL1,EXPH5,FAT4,KRT73,LBH,MAFF,MYO6,SPRED3,ST14,TMEM79
GO:BP	monoatomic ion homeostasis	GO:0050801	FALSE	9.27E-10	9.03284	616	744	30	78724	ACO1,ALAS2,ATP1B1,CALB1,CAV1,CCR2,CD19,CD40,CLIC2,CXCL10,CXCL9,DMXL1,DMXL2,EIF2AK1,FECH,GLRX5,HEXB,LACC1,NTSR1,SLC1A3,SLC45A2,SLC8A3,SLC9A9,SNCA,ATP6V0E2,F2R,GRID2IP,PLCH2,SLC12A1,TSPOAP1
GO:BP	carboxylic acid metabolic process	GO:0019752	FALSE	9.63E-10	9.01618	887	744	36	78724	ACO1,ALDH1A1,CASP1,CAV1,DDAH1,DHRS9,GLYATL2,HNMT,HSD17B4,IDH1,IL4I1,KMO,NAIP,OSBPL1A,SDSL,SLC1A3,SLC45A2,SLC7A7,SNCA,ZBTB20,ACADVL,ACOT2,ADTRP,AKR1C3,AKT1,CARNS1,CBS,CDO1,DDIT4,FPGS,MGAT4A,PER2,PFKFB1,PTGES,RIMKLA,SLC25A32
GO:BP	alpha-beta T cell activation	GO:0046631	FALSE	1.08E-09	8.96676	193	744	18	78724	CCR2,CD274,CD86,CTSL,HLA-DRA,IL15,IL2,JAK2,LGALS9,NCKAP1L,RSAD2,ASCL2,CD247,KLRF1,NKG7,SMAD7,TBX21,ZFPM1
GO:BP	developmental growth	GO:0048589	FALSE	1.09E-09	8.96063	663	744	31	78724	BCL11A,C9ORF72,GNAS,HESX1,IL7,KDM6A,KIAA0319,MAP2,NRG1,PDLIM5,PRLR,RASAL2,SMAD1,YBX3,ZFX,ACVR2B,AKT1,APBA2,BNC2,CYFIP2,DLL1,FMN1,GDF9,LGR6,MEX3C,NDN,NRCAM,PRMT2,S100B,SMAD7,SMPD3
GO:BP	developmental process involved in reproduction	GO:0003006	FALSE	1.12E-09	8.95106	1038	744	39	78724	ADAM28,BCL2L1,CCNA1,CFAP54,CSMD1,E2F8,EAF2,HESX1,HEXB,HORMAD1,HSD17B4,IDH1,INHBB,LHFPL2,NASP,PAX5,PRLR,RB1,SLC26A8,SMCHD1,STRBP,TDRD1,TDRD7,TNFSF10,TPPP3,TTC21A,YBX3,ZFX,AKR1C3,AKT1,ASCL2,DHCR24,GDF9,LRGUK,NDN,NKX3-1,PTGDR,ST14,TSGA10
GO:BP	inorganic ion transmembrane transport	GO:0098660	FALSE	1.28E-09	8.89231	944	744	37	78724	ANO5,ATP1B1,CACNA1A,CACNA1E,CACNA2D3,CAV1,CD19,CLCN1,CLIC2,CXCL10,CXCL9,KCNH7,MS4A1,NDUFV3,NTSR1,SCN9A,SESTD1,SLC1A3,SLC26A8,SLC38A5,SLC8A3,SLC9A9,SNCA,TCN2,TRPM4,AKAP5,AMIGO1,ATP6V0E2,CLIC3,F2R,KCNQ5,NDUFB8,PLCH2,RGS9,SCN2A,SLC12A1,STAC
GO:BP	regulation of T cell activation	GO:0050863	FALSE	1.28E-09	8.89204	387	744	24	78724	CAV1,CCR2,CD274,CD86,DUSP3,HLA-DMA,HLA-DMB,HLA-DRA,IL15,IL2,IL4I1,IL7,JAK2,LGALS9,NCKAP1L,PAWR,SLAMF1,SPTA1,TNFSF13B,AKT1,ASCL2,ERBB2,SMAD7,TBX21
GO:BP	negative regulation of defense response	GO:0031348	FALSE	1.36E-09	8.86597	254	744	20	78724	ADAR,FCGR2B,GNAS,HGF,IFI16,IL2,IRAK3,ISG15,LGALS9,NT5C2,OAS1,OAS3,PARP14,RB1,SERPING1,STAT2,TRIM38,USP18,KLRD1,NR1D2
GO:BP	response to interferon-beta	GO:0035456	FALSE	1.42E-09	8.8482	35	744	10	78724	AIM2,BST2,IFI16,IFITM3,OAS1,PLSCR1,PNPT1,STAT1,XAF1,NDUFA13
GO:BP	negative regulation of cell differentiation	GO:0045596	FALSE	1.49E-09	8.82607	671	744	31	78724	BCL11A,BHLHE41,C1QC,CAV1,CXCL10,FCGR2B,H4C1,IL2,KIAA0319,MAP2,MBNL3,MIB1,RB1,SMAD1,SOX6,STAT1,TENT5C,TRPM4,ASCL2,AXIN1,DAB1,DLL1,ERBB2,LBH,LDB1,MAD2L2,NFATC2,SMAD7,SPRED3,TBX21,ZFPM1
GO:BP	cell surface receptor protein tyrosine kinase signaling pathway	GO:0007169	FALSE	1.57E-09	8.80403	629	744	30	78724	BCAR3,BLNK,COL4A3,DUSP3,HGF,HHEX,HSPB1,IFI6,IL31RA,JAK2,NRG1,PHIP,PRLR,SNCA,ZFAND5,AKT1,ARHGEF28,CDK5R1,CYFIP2,DDIT4,DLL1,ERBB2,FAT4,NDN,NKX3-1,PDGFD,PTP4A3,SMPD3,TRADD,ZFYVE28
GO:BP	positive regulation of cellular component biogenesis	GO:0044089	FALSE	1.57E-09	8.80318	505	744	27	78724	BTK,CAV1,CLEC7A,DDX3X,ISG15,NAV3,NCKAP1L,NLGN1,NRG1,RICTOR,S100A10,SLITRK4,SNCA,SWAP70,TPPP3,WARS1,AMIGO1,CDK5R1,EEF2K,FMN1,MAD2L2,MAPK9,PHLDB2,SKAP1,SMPD3,TRIM32,WASHC1
GO:BP	cell killing	GO:0001906	FALSE	2.01E-09	8.69634	229	744	19	78724	C5,CD1C,CLEC7A,FCGR2B,GBP1,GBP3,HLA-DRA,LGALS9,LYST,LYZ,NCKAP1L,CD1B,GNLY,GZMB,GZMM,KIR3DL1,KLRD1,NKG7,PRF1
GO:BP	extrinsic apoptotic signaling pathway	GO:0097191	FALSE	2.17E-09	8.6627	230	744	19	78724	BCL2L1,CAV1,DDX3X,HGF,IFI27,IFI6,IL2,IL7,JAK2,NRG1,PHIP,SIAH2,SP100,STRADB,TNFSF10,AKT1,BAG3,NDUFA13,TRADD
GO:BP	regulation of type I interferon production	GO:0032479	FALSE	2.31E-09	8.63604	125	744	15	78724	DDX3X,IFIH1,IRF7,ISG15,OAS1,OAS2,OAS3,RIOK3,SIGLEC1,STAT1,TLR7,TRIM38,XAF1,ZBTB20,ARRDC4
GO:BP	type I interferon production	GO:0032606	FALSE	2.31E-09	8.63604	125	744	15	78724	DDX3X,IFIH1,IRF7,ISG15,OAS1,OAS2,OAS3,RIOK3,SIGLEC1,STAT1,TLR7,TRIM38,XAF1,ZBTB20,ARRDC4
GO:BP	intracellular transport	GO:0046907	FALSE	2.45E-09	8.61043	1381	744	45	78724	ADAR,AP1S2,AP1S3,ARHGAP44,ARL4A,ATP1B1,C9ORF72,DIAPH3,DNAJC13,DTX3L,EVI5,GNAS,HHEX,HPS5,HSPB1,IFI27,JAK2,LYST,MAP2,MX2,NSF,RGPD2,SP100,STRADB,TRAK2,TRIM58,TSPO2,TTC21A,VPS45,AKAP5,AKT1,ARL4C,AXIN1,BAG3,DYNC2I1,EXPH5,FEZ1,MYO6,NDUFA13,PLK3,PRR5L,REEP2,SARNP,TUB,WASHC1
GO:BP	regulation of hormone levels	GO:0010817	FALSE	2.50E-09	8.60231	556	744	28	78724	AANAT,ALDH1A1,BTK,CTSL,DHRS9,EXOC3L1,FFAR2,GNAS,HSD17B4,HSD17B6,IL1RN,IL4I1,INHBB,JAK2,PNPLA4,TRPM4,ACVR2B,AKR1C3,DGKQ,DHRS11,DHRS3,GDF9,GNRHR,NKX3-1,PER2,SMPD3,SULT1E1,TACR2
GO:BP	regulation of B cell proliferation	GO:0030888	FALSE	2.57E-09	8.59071	66	744	12	78724	BTK,CD22,CD40,FCGR2B,IL2,IL7,NCKAP1L,PAWR,PRLR,TNFSF13B,CD320,NFATC2
GO:BP	regulation of T cell mediated immunity	GO:0002709	FALSE	2.61E-09	8.58354	104	744	14	78724	CCR2,CD1C,CD274,FCGR2B,HLA-DRA,IL4I1,NCKAP1L,RSAD2,SLAMF1,TRPM4,CD1B,KLRD1,SMAD7,TBX21
GO:BP	positive regulation of tumor necrosis factor production	GO:0032760	FALSE	2.61E-09	8.58354	104	744	14	78724	BTK,CCR2,CLEC7A,CYBB,FCGR2B,HSPB1,IFIH1,JAK2,LGALS9,OAS1,OAS2,OAS3,ZBTB20,SPON2
GO:BP	monoatomic cation transport	GO:0006812	FALSE	2.74E-09	8.56218	1069	744	39	78724	ATP10D,ATP1B1,CACNA1A,CACNA1E,CACNA2D3,CALCRL,CALHM6,CAV1,CD19,CLIC2,CXCL10,CXCL9,KCNH7,MS4A1,NDUFV3,NSF,NTSR1,SCN9A,SESTD1,SLC1A3,SLC38A5,SLC8A3,SLC9A9,SNCA,TCN2,TRPM4,AKAP5,AKT1,AMIGO1,ATP6V0E2,F2R,KCNQ5,NDUFB8,NECTIN1,PLCH2,RGS9,SCN2A,SLC12A1,STAC
GO:BP	intracellular monoatomic cation homeostasis	GO:0030003	FALSE	3.70E-09	8.43154	524	744	27	78724	ACO1,ALAS2,ATP1B1,CALB1,CAV1,CCR2,CD19,CD40,CLIC2,CXCL10,CXCL9,DMXL1,DMXL2,GLRX5,HEXB,LACC1,NTSR1,SLC1A3,SLC45A2,SLC8A3,SLC9A9,SNCA,ATP6V0E2,F2R,GRID2IP,PLCH2,TSPOAP1
GO:BP	cell growth	GO:0016049	FALSE	3.91E-09	8.40736	485	744	26	78724	BCL11A,BST2,C9ORF72,DDX3X,EAF2,IL2,KIAA0319,MAP2,NRG1,PDLIM5,RB1,RICTOR,AKT1,CYFIP2,ERBB2,GDF9,MAD2L2,MEX3C,NDN,NRCAM,PRMT2,PRR5,S100B,SCGB3A1,SMAD7,TRIM32
GO:BP	peptidyl-tyrosine phosphorylation	GO:0018108	FALSE	4.29E-09	8.3674	239	744	19	78724	BANK1,BTK,CAV1,CD40,IL15,IL2,IL31RA,IL7,JAK2,NRG1,PARP14,PARP9,PLPP3,PRLR,RICTOR,DGKQ,ERBB2,PDGFD,ZFYVE28
GO:BP	negative regulation of phosphorus metabolic process	GO:0010563	FALSE	4.55E-09	8.34229	304	744	21	78724	ADAR,C9ORF72,CAV1,DUSP3,HGF,HHEX,HSPB1,IRAK3,PARP14,PLPP3,RB1,SLC8A3,SNCA,WARS1,AKT1,DDIT4,DGKQ,PFKFB1,PRR5L,SMAD7,ZFYVE28
GO:BP	negative regulation of phosphate metabolic process	GO:0045936	FALSE	4.55E-09	8.34229	304	744	21	78724	ADAR,C9ORF72,CAV1,DUSP3,HGF,HHEX,HSPB1,IRAK3,PARP14,PLPP3,RB1,SLC8A3,SNCA,WARS1,AKT1,DDIT4,DGKQ,PFKFB1,PRR5L,SMAD7,ZFYVE28
GO:BP	tissue morphogenesis	GO:0048729	FALSE	4.78E-09	8.32092	614	744	29	78724	ARHGAP24,CC2D2A,CCDC39,CD151,CSMD1,CXCL10,GCNT1,HESX1,HGF,KDM6A,MIB1,NRG1,SEMA3C,SMAD1,STARD13,STAT1,WNT10A,WNT16,AJAP1,AXIN1,DLL1,FAT4,FMN1,NKX3-1,PHLDB2,SMAD7,ST14,TMEM79,ZFPM1
GO:BP	peptidyl-tyrosine modification	GO:0018212	FALSE	4.97E-09	8.30353	241	744	19	78724	BANK1,BTK,CAV1,CD40,IL15,IL2,IL31RA,IL7,JAK2,NRG1,PARP14,PARP9,PLPP3,PRLR,RICTOR,DGKQ,ERBB2,PDGFD,ZFYVE28
GO:BP	intracellular monoatomic ion homeostasis	GO:0006873	FALSE	5.48E-09	8.26124	533	744	27	78724	ACO1,ALAS2,ATP1B1,CALB1,CAV1,CCR2,CD19,CD40,CLIC2,CXCL10,CXCL9,DMXL1,DMXL2,GLRX5,HEXB,LACC1,NTSR1,SLC1A3,SLC45A2,SLC8A3,SLC9A9,SNCA,ATP6V0E2,F2R,GRID2IP,PLCH2,TSPOAP1
GO:BP	canonical NF-kappaB signal transduction	GO:0007249	FALSE	5.83E-09	8.23426	308	744	21	78724	BST2,CASP1,CAV1,CD40,CLEC7A,HSPB1,IFIT5,LGALS9,RIOK3,STAT1,TLR7,TNFSF10,TRIM22,TRIM38,TRIM5,TRIM58,AKT1,F2R,S100B,TRADD,TRIM32
GO:BP	B cell differentiation	GO:0030183	FALSE	5.86E-09	8.23236	158	744	16	78724	AICDA,BLNK,BTK,CD19,FCGR2B,HHEX,IFNE,IL2,IL4I1,IL7,MS4A1,NCKAP1L,PAX5,TNFSF13B,DLL1,MFNG
GO:BP	biological process involved in interaction with host	GO:0051701	FALSE	6.01E-09	8.22124	185	744	17	78724	CAV1,CD86,CTSL,GYPA,IFIT1,INHBB,LGALS9,MRC1,PLSCR1,SIGLEC1,SLAMF1,TRIM22,TRIM38,TRIM5,TRIM58,NCAM1,NECTIN1
GO:BP	negative regulation of protein phosphorylation	GO:0001933	FALSE	6.64E-09	8.17762	245	744	19	78724	ADAR,C9ORF72,CAV1,DUSP3,HGF,HHEX,HSPB1,IRAK3,PARP14,PLPP3,RB1,SLC8A3,SNCA,WARS1,AKT1,DGKQ,PRR5L,SMAD7,ZFYVE28
GO:BP	positive regulation of leukocyte cell-cell adhesion	GO:1903039	FALSE	6.72E-09	8.17235	277	744	20	78724	CAV1,CCR2,CD274,CD86,GCNT1,HLA-DMA,HLA-DMB,HLA-DRA,IL15,IL2,IL4I1,IL7,JAK2,LGALS9,NCKAP1L,SLAMF1,SPTA1,TNFSF13B,AKT1,SKAP1
GO:BP	regulation of protein-containing complex assembly	GO:0043254	FALSE	7.61E-09	8.11836	421	744	24	78724	BCL11A,BTK,CLEC7A,DDX3X,EIF2AK2,ISG15,KANK2,MAP2,NAV3,NCKAP1L,NRG1,RB1,RICTOR,RIOK3,SNCA,SPTA1,TMOD2,TPPP3,WARS1,CDK5R1,CYFIP2,FMN1,MAPK9,SKAP1
GO:BP	positive regulation of adaptive immune response	GO:0002821	FALSE	8.01E-09	8.09626	136	744	15	78724	BTK,CCR2,CD1C,CD40,CLEC7A,HLA-DRA,IL2,JAK2,RSAD2,SLAMF1,TNFSF13B,CD1B,MAD2L2,SKAP1,TBX21
GO:BP	nucleobase-containing small molecule metabolic process	GO:0055086	FALSE	8.48E-09	8.07149	673	744	30	78724	ACOT9,ADCY6,AICDA,ATP1B1,CMPK2,ENTPD2,HSD17B4,IDH1,KMO,LACC1,MBD4,NDUFV3,NME4,NT5C2,PUDP,SMPDL3A,SNCA,ZBTB20,ACOT2,AK5,DDIT4,LRGUK,NDUFA13,NDUFB8,NME3,NUDT13,PDE9A,PFKFB1,PTGDR,SULT1E1
GO:BP	behavior	GO:0007610	FALSE	8.80E-09	8.05555	674	744	30	78724	AIM2,BAHCC1,CALB1,CSMD1,HEXB,MMP17,NLGN1,NTSR1,PAX5,SCN9A,SGIP1,SLC1A3,SLC8A3,SNCA,SOBP,STRBP,TMOD2,ZFX,AKT1,APBA2,DAB1,GPR176,NPAS2,NR1D2,PER3,S100B,SCN2A,SELENOP,TACR2,ZNF212
GO:BP	cell junction assembly	GO:0034329	FALSE	8.83E-09	8.05401	503	744	26	78724	CAV1,DOCK4,DUSP3,EPB41L3,GPC4,NLGN1,PDLIM5,PKN2,PTPRO,S100A10,SLITRK4,SNCA,UGT8,AMIGO1,CYFIP2,DAPK3,EEF2K,FMN1,LDB1,LIM2,NECTIN1,NRCAM,PARD6B,PATJ,PHLDB2,SMAD7
GO:BP	regulation of cell cycle process	GO:0010564	FALSE	9.04E-09	8.0439	720	744	31	78724	AICDA,BCL2L1,CHEK2,DDX3X,DTX3L,E2F8,HORMAD1,KANK2,MAP3K20,PARP9,PHIP,PKN2,PLSCR1,PSME2,RB1,RBBP8,SMC6,TXLNG,AKT1,CCND3,CCNQ,DAPK3,FBXW5,MAD2L2,MRGPRX2,MUS81,PLK3,PRMT2,RASSF1,SMPD3,TOM1L2
GO:BP	positive regulation of catabolic process	GO:0009896	FALSE	9.52E-09	8.02143	546	744	27	78724	C9ORF72,CAV1,DTX3L,EIF2AK1,NSF,NUB1,PNPT1,SAMD4A,SNCA,SPTLC2,TRIM22,TRIM38,TRIM5,TRIM58,ZBTB20,AKT1,AXIN1,BAG3,DDA1,MAPK9,NDUFA13,PFKFB1,PLK3,PRR5L,SH3RF3,SMAD7,TRIM32
GO:BP	symbiont entry into host cell	GO:0046718	FALSE	1.10E-08	7.95766	139	744	15	78724	CAV1,CD86,CTSL,GYPA,LGALS9,MRC1,PLSCR1,SIGLEC1,SLAMF1,TRIM22,TRIM38,TRIM5,TRIM58,NCAM1,NECTIN1
GO:BP	sexual reproduction	GO:0019953	FALSE	1.17E-08	7.93111	1122	744	39	78724	ADAM28,BCL2L1,CCNA1,CFAP54,DDX3X,FANCL,FCRL5,FOLR2,FOLR3,HEXB,HORMAD1,INHBB,LHFPL2,PAX5,RB1,RBBP8,SHOC1,SLC26A8,SMAD1,SMCHD1,STRBP,TDRD1,TDRD7,TTC21A,YBX3,ZFX,AKT1,CCNB3,GDF9,HSPA1L,KLHDC3,LRGUK,MUS81,NDN,NELL2,OVGP1,PTGDR2,SELENOP,TSGA10
GO:BP	cellular response to hormone stimulus	GO:0032870	FALSE	1.21E-08	7.91884	638	744	29	78724	ADCY6,BCAR3,CAV1,CTSL,FECH,GNAS,INHBB,JAK2,KANK2,KDM6A,PHIP,PRLR,RB1,SP100,STAT1,ADTRP,AKR1C3,AKT1,DDIT4,DHRS3,EEF2K,ESRRA,GNRHR,LBH,NKX3-1,NR1D2,PDE3B,PRMT2,PTGDR
GO:BP	regulation of tumor necrosis factor production	GO:0032680	FALSE	1.25E-08	7.90244	166	744	16	78724	BTK,CCR2,CLEC7A,CYBB,FCGR2B,HSPB1,IFIH1,IRAK3,JAK2,LGALS9,OAS1,OAS2,OAS3,SLAMF1,ZBTB20,SPON2
GO:BP	tumor necrosis factor production	GO:0032640	FALSE	1.25E-08	7.90244	166	744	16	78724	BTK,CCR2,CLEC7A,CYBB,FCGR2B,HSPB1,IFIH1,IRAK3,JAK2,LGALS9,OAS1,OAS2,OAS3,SLAMF1,ZBTB20,SPON2
GO:BP	positive regulation of type I interferon production	GO:0032481	FALSE	1.26E-08	7.89951	75	744	12	78724	DDX3X,IFIH1,IRF7,ISG15,OAS1,OAS2,OAS3,RIOK3,STAT1,TLR7,ZBTB20,ARRDC4
GO:BP	regulation of canonical NF-kappaB signal transduction	GO:0043122	FALSE	1.28E-08	7.89154	287	744	20	78724	BST2,CASP1,CAV1,CD40,CLEC7A,HSPB1,IFIT5,LGALS9,RIOK3,STAT1,TLR7,TNFSF10,TRIM22,TRIM38,TRIM5,TRIM58,F2R,S100B,TRADD,TRIM32
GO:BP	biological process involved in symbiotic interaction	GO:0044403	FALSE	1.45E-08	7.83724	225	744	18	78724	BST2,CAV1,CD86,CTSL,GYPA,IFIT1,INHBB,LGALS9,MRC1,PLSCR1,SIGLEC1,SLAMF1,TRIM22,TRIM38,TRIM5,TRIM58,NCAM1,NECTIN1
GO:BP	monoatomic cation transmembrane transport	GO:0098655	FALSE	1.48E-08	7.82981	877	744	34	78724	ATP1B1,CACNA1A,CACNA1E,CACNA2D3,CALHM6,CAV1,CD19,CLIC2,CXCL10,CXCL9,KCNH7,MS4A1,NDUFV3,NTSR1,SCN9A,SESTD1,SLC1A3,SLC38A5,SLC8A3,SLC9A9,SNCA,TCN2,TRPM4,AKAP5,AMIGO1,ATP6V0E2,F2R,KCNQ5,NDUFB8,PLCH2,RGS9,SCN2A,SLC12A1,STAC
GO:BP	negative regulation of cell-cell adhesion	GO:0022408	FALSE	1.52E-08	7.81752	196	744	17	78724	CD274,DUSP3,IL1RN,IL2,IL4I1,JAK2,LGALS9,PAWR,SWAP70,ADTRP,AKT1,ASCL2,CCL28,ERBB2,MAD2L2,SMAD7,TBX21
GO:BP	exocytosis	GO:0006887	FALSE	1.54E-08	7.81177	360	744	22	78724	ARHGAP44,BTK,C9ORF72,CCR2,EXOC3L1,FCGR2B,LGALS9,MILR1,NCKAP1L,NLGN1,NSF,S100A10,SNCA,EXPH5,LLGL2,MRGPRX2,NKG7,PTGDR,RAB40B,SMPD3,TMEM79,WASHC1
GO:BP	metal ion transport	GO:0030001	FALSE	1.78E-08	7.7502	883	744	34	78724	ATP1B1,CACNA1A,CACNA1E,CACNA2D3,CALCRL,CAV1,CD19,CLIC2,CXCL10,CXCL9,KCNH7,MS4A1,NSF,NTSR1,SCN9A,SESTD1,SLC1A3,SLC38A5,SLC8A3,SLC9A9,SNCA,TCN2,TRPM4,AKAP5,AKT1,AMIGO1,F2R,KCNQ5,NECTIN1,PLCH2,RGS9,SCN2A,SLC12A1,STAC
GO:BP	symbiont entry into host	GO:0044409	FALSE	1.84E-08	7.73409	144	744	15	78724	CAV1,CD86,CTSL,GYPA,LGALS9,MRC1,PLSCR1,SIGLEC1,SLAMF1,TRIM22,TRIM38,TRIM5,TRIM58,NCAM1,NECTIN1
GO:BP	negative regulation of phosphorylation	GO:0042326	FALSE	1.88E-08	7.72598	260	744	19	78724	ADAR,C9ORF72,CAV1,DUSP3,HGF,HHEX,HSPB1,IRAK3,PARP14,PLPP3,RB1,SLC8A3,SNCA,WARS1,AKT1,DGKQ,PRR5L,SMAD7,ZFYVE28
GO:BP	response to tumor necrosis factor	GO:0034612	FALSE	1.95E-08	7.70925	229	744	18	78724	AIM2,CASP1,CD40,GBP1,GBP3,GCH1,JAK2,NAIP,NUB1,STAT1,TNFSF13B,YBX3,AKT1,CHI3L1,NKX3-1,SMPD3,TRADD,TRIM32
GO:BP	antigen processing and presentation of peptide antigen via MHC class II	GO:0002495	FALSE	2.36E-08	7.62621	32	744	9	78724	CTSE,CTSL,CTSV,FCGR2B,HLA-DMA,HLA-DMB,HLA-DRA,MARCHF1,MARCHF8
GO:BP	endomembrane system organization	GO:0010256	FALSE	2.48E-08	7.60554	613	744	28	78724	ANO5,AP1S2,AP1S3,CASP7,CAV1,DNAJC13,DNM1,EPB41L3,FOLR2,FOLR3,GOLPH3L,HPS5,LYST,NSF,PLSCR1,PLSCR4,S100A10,SPTA1,XKR9,AKT1,F2R,FAT4,GOLGA8A,GOLGA8K,GOLGA8M,GOLGA8O,PLK3,REEP2
GO:BP	microtubule-based process	GO:0007017	FALSE	2.81E-08	7.55091	999	744	36	78724	AUNIP,CC2D2A,CCDC39,CCDC68,CFAP54,CHEK2,DIAPH3,DNAH8,GAS2L3,HSPB1,MAP2,NAV3,NCKAP5,ODAD4,SNCA,TPPP3,TRAK2,TRIM58,TTC21A,TUBB6,AXIN1,BAG3,CDK5R1,DYNC2I1,ERBB2,FBXW5,FEZ1,KIFC2,LLGL2,LRGUK,NINL,PARD6B,PHLDB2,PLK3,TACR2,TUB
GO:BP	inorganic cation transmembrane transport	GO:0098662	FALSE	3.27E-08	7.48533	854	744	33	78724	ATP1B1,CACNA1A,CACNA1E,CACNA2D3,CAV1,CD19,CLIC2,CXCL10,CXCL9,KCNH7,MS4A1,NDUFV3,NTSR1,SCN9A,SESTD1,SLC1A3,SLC38A5,SLC8A3,SLC9A9,SNCA,TCN2,TRPM4,AKAP5,AMIGO1,ATP6V0E2,F2R,KCNQ5,NDUFB8,PLCH2,RGS9,SCN2A,SLC12A1,STAC
GO:BP	regulation of body fluid levels	GO:0050878	FALSE	3.59E-08	7.44505	376	744	22	78724	ADCY6,ANXA5,CAV1,CD40,ENTPD2,FAP,GNAS,HPS5,HSPB1,JAK2,OAS2,PLSCR1,PRLR,PTPRO,SERPINB2,SERPING1,ADTRP,CDO1,DGKK,DGKQ,F2R,PAFAH2
GO:BP	central nervous system development	GO:0007417	FALSE	3.73E-08	7.42863	1061	744	37	78724	AIM2,C1QA,CCDC39,FCGR2B,GNB4,HESX1,INHBB,MAOB,MAP2,NFIB,ODAD4,PAX5,PLPP3,SLC8A3,SMAD1,SOX6,UGT8,AMIGO1,ARHGEF28,CBS,CD320,CDK5R1,DAB1,DDIT4,DLL1,ERBB2,FAT4,FEZ1,LAMC3,LDB1,NDN,NPAS2,NRCAM,S100B,SCN2A,SELENOP,ZNF76
GO:BP	positive regulation of MAPK cascade	GO:0043410	FALSE	4.01E-08	7.39716	456	744	24	78724	BANK1,BCAR3,CD40,EIF2AK2,FCGR2B,GCNT2,HGF,JAK2,LGALS9,MAP2K6,MARCO,NAIP,NRG1,SASH1,SCIMP,SLAMF1,TRIM5,WNT16,AXIN1,CHI3L1,ERBB2,F2R,PDGFD,SH3RF3
GO:BP	skeletal system development	GO:0001501	FALSE	4.22E-08	7.37431	540	744	26	78724	COL19A1,GNAS,HEXB,MAP2K6,NFIB,PAX5,RB1,SMAD1,SOX6,TRPS1,ZFAND5,ACVR2B,BNC2,CBS,CHI3L1,COL13A1,COL18A1,DHRS3,DYNC2I1,FAT4,FMN1,MEX3C,NFATC2,NLE1,SMAD7,SMPD3
GO:BP	negative regulation of cytokine-mediated signaling pathway	GO:0001960	FALSE	4.36E-08	7.36031	83	744	12	78724	ADAR,CAV1,IL1RN,IRAK3,ISG15,NAIP,OAS1,OAS3,PARP14,STAT2,USP18,USP25
GO:BP	regulation of anatomical structure size	GO:0090066	FALSE	4.60E-08	7.33745	500	744	25	78724	ADCY6,BCL11A,CAV1,DNM1,DOCK4,GCH1,KANK2,KDM6A,KIAA0319,MAP2,NCKAP1L,RICTOR,SMTNL1,SPTA1,SWAP70,TMOD2,TRPM4,CBS,CYFIP2,F2R,FMN1,MANF,NRCAM,PER2,SLC12A1
GO:BP	protein-containing complex organization	GO:0043933	FALSE	4.64E-08	7.33321	3434	744	75	78724	ADAR,AIM2,BCL11A,BTK,CASP1,CCDC39,CD40,CHD1,CLEC7A,DDX3X,DIAPH3,DNAH8,DNM1,EIF2AK2,EIF2S3,EIF2S3B,FECH,GBP1,GCH1,H4C1,HLA-DMA,HLA-DMB,HLA-DRA,IFIH1,IRAK3,ISG15,JAK2,KANK2,MAP2,MLKL,MS4A1,NASP,NAV3,NCKAP1L,NCKAP5,NRG1,NSF,OAS1,ODAD4,PNPT1,PRLR,RB1,RICTOR,RIOK3,RUBCNL,SETSIP,SNCA,SPTA1,SWAP70,TCF4,TMOD2,TPPP3,TRPM4,WARS1,ZRSR2,AXIN1,CAND2,CD247,CDK5R1,CYFIP2,DDIT4,EEF2K,FMN1,IL2RB,MAPK9,MED27,NAA60…
GO:BP	sensory perception	GO:0007600	FALSE	4.66E-08	7.33183	966	744	35	78724	CCDC50,CCR2,COL4A3,CRYBA1,DIAPH3,DRAM2,GNAS,HEXB,NTSR1,OR2I1P,OR2W3,OR52K1,PKHD1L1,PNOC,RTP4,SCN9A,SLC1A3,SLC45A2,SOBP,ZNF354A,AXIN1,CA6,COL18A1,DHRS3,F2R,IMPG1,LAMC3,MRGPRX2,MYO6,NDN,NR2F6,PTGES,REEP2,RGS9,TUB
GO:BP	myeloid cell homeostasis	GO:0002262	FALSE	4.67E-08	7.3304	181	744	16	78724	ADAR,ALAS2,BTK,CCR2,DIAPH3,FAM210B,FECH,ISG15,JAK2,NCKAP1L,RB1,STAT1,TRIM58,TSPO2,LDB1,ZFPM1
GO:BP	small GTPase-mediated signal transduction	GO:0007264	FALSE	5.68E-08	7.24588	505	744	25	78724	ARHGAP24,ARHGAP44,BCAR3,DOCK4,FGD4,KANK2,PLEKHG1,RALGPS2,RASGEF1B,RASGRP3,RB1,RIN2,SIAH2,STARD13,SWAP70,ARHGEF28,DAB1,DHCR24,DOCK6,ERBB2,F2R,PLEKHG4,RASSF1,RHEBL1,RHOF
GO:BP	positive regulation of adaptive immune response based on somatic recombination of immune receptors built from immunoglobulin superfamily domains	GO:0002824	FALSE	5.73E-08	7.24218	130	744	14	78724	BTK,CCR2,CD1C,CD40,CLEC7A,HLA-DRA,IL2,JAK2,RSAD2,SLAMF1,TNFSF13B,CD1B,MAD2L2,TBX21
GO:BP	positive regulation of canonical NF-kappaB signal transduction	GO:0043123	FALSE	6.16E-08	7.2103	214	744	17	78724	BST2,CASP1,CAV1,CD40,CLEC7A,IFIT5,LGALS9,TLR7,TNFSF10,TRIM22,TRIM38,TRIM5,TRIM58,F2R,S100B,TRADD,TRIM32
GO:BP	T cell proliferation	GO:0042098	FALSE	6.63E-08	7.17832	215	744	17	78724	CCR2,CD151,CD274,CD86,HLA-DMB,IL15,IL2,IL4I1,JAK2,LGALS9,NCKAP1L,PAWR,SLAMF1,SPTA1,TNFSF13B,CCND3,ERBB2
GO:BP	antigen processing and presentation of peptide or polysaccharide antigen via MHC class II	GO:0002504	FALSE	7.67E-08	7.11496	36	744	9	78724	CTSE,CTSL,CTSV,FCGR2B,HLA-DMA,HLA-DMB,HLA-DRA,MARCHF1,MARCHF8
GO:BP	negative regulation of response to cytokine stimulus	GO:0060761	FALSE	7.72E-08	7.11248	87	744	12	78724	ADAR,CAV1,IL1RN,IRAK3,ISG15,NAIP,OAS1,OAS3,PARP14,STAT2,USP18,USP25
GO:BP	nucleoside phosphate metabolic process	GO:0006753	FALSE	8.31E-08	7.08024	646	744	28	78724	ACOT9,ADCY6,ATP1B1,CMPK2,ENTPD2,HSD17B4,IDH1,KMO,LACC1,MBD4,NDUFV3,NME4,NT5C2,PUDP,SMPDL3A,SNCA,ZBTB20,ACOT2,AK5,DDIT4,LRGUK,NDUFA13,NDUFB8,NME3,NUDT13,PDE9A,PFKFB1,SULT1E1
GO:BP	response to interleukin-1	GO:0070555	FALSE	8.85E-08	7.05326	110	744	13	78724	CD40,GBP1,GBP3,IL1RN,INHBB,IRAK3,KMO,LGALS9,SNCA,VRK2,ZBP1,CHI3L1,NKX3-1
GO:BP	negative regulation of innate immune response	GO:0045824	FALSE	8.86E-08	7.05254	88	744	12	78724	ADAR,IFI16,IRAK3,ISG15,LGALS9,OAS1,OAS3,PARP14,SERPING1,STAT2,USP18,KLRD1
GO:BP	negative regulation of leukocyte mediated immunity	GO:0002704	FALSE	9.89E-08	7.00467	69	744	11	78724	BST2,CCR2,CD274,FCGR2B,IL4I1,LGALS9,NCKAP1L,SLAMF1,KLRD1,SMAD7,TBX21
GO:BP	pyroptotic inflammatory response	GO:0070269	FALSE	1.01E-07	6.99758	37	744	9	78724	AIM2,CASP1,GBP1,GBP3,IFI27,MAP3K20,NAIP,ZBP1,GZMB
GO:BP	erythrocyte differentiation	GO:0030218	FALSE	1.06E-07	6.97602	136	744	14	78724	ADAR,ALAS2,DIAPH3,FAM210B,FECH,ISG15,JAK2,NCKAP1L,RB1,STAT1,TRIM58,TSPO2,LDB1,ZFPM1
GO:BP	cell chemotaxis	GO:0060326	FALSE	1.07E-07	6.96881	323	744	20	78724	C3AR1,C5,CCR2,CCRL2,CXCL10,CXCL9,DOCK4,FFAR2,HGF,HSPB1,LGALS9,LYST,NCKAP1L,PTPRO,SLAMF1,SWAP70,TRPM4,CCL28,CCL3L3,PDGFD
GO:BP	positive regulation of T cell activation	GO:0050870	FALSE	1.09E-07	6.96423	254	744	18	78724	CAV1,CCR2,CD274,CD86,HLA-DMA,HLA-DMB,HLA-DRA,IL15,IL2,IL4I1,IL7,JAK2,LGALS9,NCKAP1L,SLAMF1,SPTA1,TNFSF13B,AKT1
GO:BP	alcohol metabolic process	GO:0006066	FALSE	1.20E-07	6.92086	362	744	21	78724	ALDH1A1,CHEK2,DHRS9,FECH,GCH1,GK,HSD17B6,IDH1,NTSR1,OSBPL1A,PLPP3,PNPLA4,SNCA,SPTLC2,ACADVL,AKR1C3,DGKQ,DHCR24,DHRS3,EPHX2,SULT1E1
GO:BP	leukocyte migration	GO:0050900	FALSE	1.30E-07	6.88755	402	744	22	78724	C3AR1,C5,CCR2,CXCL10,CXCL9,FFAR2,GCNT1,LGALS9,LYST,NCKAP1L,PTPRO,SLAMF1,SWAP70,TRPM4,ADTRP,AKT1,ASCL2,CCL28,CCL3L3,PDGFD,SMPD3,TBX21
GO:BP	B cell activation involved in immune response	GO:0002312	FALSE	1.33E-07	6.87727	91	744	12	78724	AICDA,CD180,CD19,CD40,FCGR2B,IL2,SANBR,SWAP70,DLL1,MAD2L2,MFNG,TBX21
GO:BP	DNA metabolic process	GO:0006259	FALSE	1.35E-07	6.86912	1005	744	35	78724	AICDA,APOBEC3A,AUNIP,CD40,CHEK2,DTX3L,E2F8,FANCL,GCH1,HGF,HORMAD1,IL2,MBD4,NASP,NFIB,PARP9,POLK,RBBP8,SANBR,SHOC1,SMC6,SMCHD1,SP100,SWAP70,XRN1,AKT1,APOBEC3H,CBS,KLHDC3,MAD2L2,MUS81,NME3,NPAS2,SMPD3,TBX21
GO:BP	myeloid cell differentiation	GO:0030099	FALSE	1.37E-07	6.86466	443	744	23	78724	ADAR,ALAS2,C1QC,DIAPH3,EIF2AK1,FAM210B,FECH,H4C1,IFI16,IL15,IL31RA,IRF7,ISG15,JAK2,NCKAP1L,RB1,STAT1,TRIM58,TSPO2,DLL1,LDB1,PRXL2A,ZFPM1
GO:BP	positive regulation of production of molecular mediator of immune response	GO:0002702	FALSE	1.42E-07	6.84793	139	744	14	78724	BTK,CD40,CD86,CLEC7A,FFAR2,IL2,LACC1,RSAD2,SCIMP,SLAMF1,TLR7,MAD2L2,SPON2,TBX21
GO:BP	cell surface receptor signaling pathway via JAK-STAT	GO:0007259	FALSE	1.42E-07	6.84793	139	744	14	78724	CAV1,CCR2,CD40,IL15,IL2,IL31RA,JAK2,PARP14,PARP9,PRLR,STAT1,STAT2,DAB1,F2R
GO:BP	regulation of angiogenesis	GO:0045765	FALSE	1.47E-07	6.83187	293	744	19	78724	C3AR1,CCR2,CD40,COL4A3,CXCL10,CYBB,DDAH1,HHEX,HSPB1,SASH1,SMAD1,SP100,STAT1,WARS1,CHI3L1,CLIC3,DLL1,ERBB2,PDE3B
GO:BP	negative regulation of catalytic activity	GO:0043086	FALSE	1.47E-07	6.83187	293	744	19	78724	ADAR,CAV1,CCR2,DTX3L,DUSP3,HHEX,HSPB1,IFIT1,IRAK3,PARP9,RB1,SLC8A3,SNCA,WARS1,AKAP5,AKT1,MAD2L2,SMAD7,ZFYVE28
GO:BP	positive regulation of DNA-binding transcription factor activity	GO:0051091	FALSE	1.55E-07	6.81058	196	744	16	78724	AIM2,BTK,CD40,CLEC7A,EIF2AK2,IRAK3,LGALS9,PLPP3,SP100,TRIM22,TRIM38,TRIM5,AKT1,RHEBL1,TRADD,TRIM32
GO:BP	negative regulation of transferase activity	GO:0051348	FALSE	1.55E-07	6.80904	167	744	15	78724	ADAR,CAV1,DTX3L,DUSP3,HHEX,HSPB1,IRAK3,RB1,SLC8A3,SNCA,WARS1,AKT1,MAD2L2,SMAD7,ZFYVE28
GO:BP	regulation of leukocyte differentiation	GO:1902105	FALSE	1.57E-07	6.8036	330	744	20	78724	BTK,C1QC,CCR2,CD86,FCGR2B,HLA-DRA,IL15,IL2,IL4I1,IL7,IRF7,LGALS9,NCKAP1L,RB1,ASCL2,ERBB2,PRXL2A,SMAD7,TBX21,ZFPM1
GO:BP	positive regulation of chemokine production	GO:0032722	FALSE	1.60E-07	6.79645	72	744	11	78724	C5,CLEC7A,DDX3X,EIF2AK2,FFAR2,IL7,LGALS9,OAS1,OAS3,TLR7,TRIM32
GO:BP	regulation of peptidyl-tyrosine phosphorylation	GO:0050730	FALSE	1.80E-07	6.74477	198	744	16	78724	BANK1,CAV1,CD40,IL15,IL2,IL31RA,IL7,JAK2,NRG1,PARP14,PARP9,PLPP3,RICTOR,DGKQ,PDGFD,ZFYVE28
GO:BP	regulation of endocytosis	GO:0030100	FALSE	1.86E-07	6.73163	297	744	19	78724	BTK,CAV1,CD151,CD22,CLEC7A,FCGR2B,IL15,MIB1,NCKAP1L,NLGN1,NRG1,PLSCR1,SGIP1,SNCA,DGKQ,DLL1,EEF2K,IL2RB,TUB
GO:BP	antiviral innate immune response	GO:0140374	FALSE	1.91E-07	6.71971	55	744	10	78724	CXCL10,EIF2AK2,IFIH1,IFIT1,IFIT2,IFIT3,MX1,OAS1,USP18,ZBP1
GO:BP	sensory organ development	GO:0007423	FALSE	1.91E-07	6.71835	624	744	27	78724	BCAR3,C1QB,CALB1,CC2D2A,CRYBA1,DIAPH3,DRAM2,HESX1,NFIB,SMCHD1,SOBP,TDRD7,WNT10A,WNT16,ACVR2B,ASCL2,BFSP1,BNC2,DLL1,FAT4,LAMC3,LIM2,MYO6,NECTIN1,PER2,SPRED3,TUB
GO:BP	blood coagulation	GO:0007596	FALSE	2.05E-07	6.68901	231	744	17	78724	ANXA5,CAV1,CD40,ENTPD2,FAP,GNAS,HPS5,HSPB1,JAK2,PLSCR1,SERPINB2,SERPING1,ADTRP,DGKK,DGKQ,F2R,PAFAH2
GO:BP	regulation of vasculature development	GO:1901342	FALSE	2.08E-07	6.68211	299	744	19	78724	C3AR1,CCR2,CD40,COL4A3,CXCL10,CYBB,DDAH1,HHEX,HSPB1,SASH1,SMAD1,SP100,STAT1,WARS1,CHI3L1,CLIC3,DLL1,ERBB2,PDE3B
GO:BP	negative regulation of apoptotic signaling pathway	GO:2001234	FALSE	2.19E-07	6.65975	232	744	17	78724	BCL2L1,DDIAS,DDX3X,HGF,HSPB1,IFI6,IL7,KDM6A,NRG1,PHIP,RB1,SIAH2,STRADB,WNT16,YBX3,AKT1,TRIM32
GO:BP	regulation of pattern recognition receptor signaling pathway	GO:0062207	FALSE	2.36E-07	6.6273	172	744	15	78724	BTK,CAV1,DDX3X,DDX60,EIF2AK2,IFI35,IRAK3,IRF7,OASL,RIOK3,RSAD2,SMPDL3A,WDFY1,AKT1,TRIM32
GO:BP	chemokine production	GO:0032602	FALSE	2.52E-07	6.59928	96	744	12	78724	C5,CLEC7A,DDX3X,EIF2AK2,FFAR2,IL7,LGALS9,OAS1,OAS3,TLR7,TRIM32,ZFPM1
GO:BP	regulation of chemokine production	GO:0032642	FALSE	2.52E-07	6.59928	96	744	12	78724	C5,CLEC7A,DDX3X,EIF2AK2,FFAR2,IL7,LGALS9,OAS1,OAS3,TLR7,TRIM32,ZFPM1
GO:BP	calcium ion transmembrane transport	GO:0070588	FALSE	2.66E-07	6.57473	340	744	20	78724	ATP1B1,CACNA1A,CACNA1E,CACNA2D3,CAV1,CD19,CLIC2,CXCL10,CXCL9,MS4A1,NTSR1,SESTD1,SLC8A3,SNCA,TRPM4,AKAP5,F2R,PLCH2,RGS9,STAC
GO:BP	positive regulation of NF-kappaB transcription factor activity	GO:0051092	FALSE	2.68E-07	6.57179	120	744	13	78724	AIM2,BTK,CD40,CLEC7A,EIF2AK2,IRAK3,LGALS9,TRIM22,TRIM38,TRIM5,RHEBL1,TRADD,TRIM32
GO:BP	intracellular chemical homeostasis	GO:0055082	FALSE	2.89E-07	6.53895	730	744	29	78724	ACO1,ALAS2,ATP1B1,CALB1,CAV1,CCR2,CD19,CD40,CLIC2,CXCL10,CXCL9,DMXL1,DMXL2,GLRX5,HEXB,LACC1,NTSR1,SLC1A3,SLC45A2,SLC8A3,SLC9A9,SNCA,TRPM4,ZBTB20,ATP6V0E2,F2R,GRID2IP,PLCH2,TSPOAP1
GO:BP	erythrocyte homeostasis	GO:0034101	FALSE	3.01E-07	6.52126	147	744	14	78724	ADAR,ALAS2,DIAPH3,FAM210B,FECH,ISG15,JAK2,NCKAP1L,RB1,STAT1,TRIM58,TSPO2,LDB1,ZFPM1
GO:BP	coagulation	GO:0050817	FALSE	3.26E-07	6.48724	238	744	17	78724	ANXA5,CAV1,CD40,ENTPD2,FAP,GNAS,HPS5,HSPB1,JAK2,PLSCR1,SERPINB2,SERPING1,ADTRP,DGKK,DGKQ,F2R,PAFAH2
GO:BP	hemostasis	GO:0007599	FALSE	3.26E-07	6.48724	238	744	17	78724	ANXA5,CAV1,CD40,ENTPD2,FAP,GNAS,HPS5,HSPB1,JAK2,PLSCR1,SERPINB2,SERPING1,ADTRP,DGKK,DGKQ,F2R,PAFAH2
GO:BP	cellular response to growth factor stimulus	GO:0071363	FALSE	3.59E-07	6.44501	689	744	28	78724	CAV1,DUSP3,FSTL1,GCNT2,HGF,HHEX,HSPB1,KDM6A,SMAD1,SOX6,WNT10A,ACVR2B,AKT1,AXIN1,CYFIP2,DDIT4,DLL1,EEF2K,ERBB2,FAT4,FEZ1,GDF9,NDN,PDGFD,PTP4A3,SMAD7,SMPD3,SPRED3
GO:BP	cellular response to tumor necrosis factor	GO:0071356	FALSE	3.74E-07	6.42688	208	744	16	78724	AIM2,CASP1,CD40,GBP1,GBP3,JAK2,NAIP,STAT1,TNFSF13B,YBX3,AKT1,CHI3L1,NKX3-1,SMPD3,TRADD,TRIM32
GO:BP	cellular response to virus	GO:0098586	FALSE	3.91E-07	6.40815	78	744	11	78724	ADAR,CXCL10,DDX3X,IFI6,IFIH1,IFNE,JAK2,LGALS9,OAS1,RIOK3,TLR7
GO:BP	positive regulation of catalytic activity	GO:0043085	FALSE	3.94E-07	6.40431	554	744	25	78724	ARHGAP44,BCAR3,CAV1,CD40,DDX3X,EVI5,GCH1,GNAS,JAK2,NRG1,PLSCR1,PRLR,S100A10,SASH1,SNCA,STRADB,TNFSF15,AKAP5,AKT1,ARRDC4,AXIN1,CCND3,CHI3L1,ERBB2,F2R
GO:BP	cell surface receptor signaling pathway via STAT	GO:0097696	FALSE	3.94E-07	6.40398	150	744	14	78724	CAV1,CCR2,CD40,IL15,IL2,IL31RA,JAK2,PARP14,PARP9,PRLR,STAT1,STAT2,DAB1,F2R
GO:BP	phagocytosis	GO:0006909	FALSE	3.95E-07	6.40289	241	744	17	78724	BTK,CCR2,CLEC7A,CRYBA1,EIF2AK1,FCGR2B,IL15,LYST,MARCO,MSR1,NCKAP1L,PLSCR1,SLAMF1,XKR9,IL2RB,SPON2,TUB
GO:BP	immunoglobulin mediated immune response	GO:0016064	FALSE	4.02E-07	6.39607	209	744	16	78724	AICDA,BTK,C1QA,C1QC,C5,CD19,CD40,FCGR2B,IL2,IRF7,SANBR,SERPING1,SWAP70,IL2RB,MAD2L2,TBX21
GO:BP	cellular response to type II interferon	GO:0071346	FALSE	4.09E-07	6.38849	100	744	12	78724	CASP1,GBP1,GBP3,JAK2,LGALS9,MRC1,PARP14,PARP9,SP100,STAT1,DAPK3,TXK
GO:BP	interleukin-6 production	GO:0032635	FALSE	4.71E-07	6.32728	152	744	14	78724	BANK1,BTK,CLEC7A,HGF,IFIH1,IRAK3,LGALS9,NCKAP1L,SCIMP,SLAMF1,TLR7,ZBTB20,F2R,SPON2
GO:BP	regulation of interleukin-6 production	GO:0032675	FALSE	4.71E-07	6.32728	152	744	14	78724	BANK1,BTK,CLEC7A,HGF,IFIH1,IRAK3,LGALS9,NCKAP1L,SCIMP,SLAMF1,TLR7,ZBTB20,F2R,SPON2
GO:BP	regulation of growth	GO:0040008	FALSE	4.72E-07	6.32598	604	744	26	78724	BCL11A,BCL2L1,BST2,DDX3X,EAF2,GNAS,IL2,IL7,KIAA0319,MAP2,NRG1,PNPT1,RB1,RICTOR,YBX3,AKT1,DLL1,ERBB2,GDF9,MAD2L2,NRCAM,PRR5,SCGB3A1,SELENOP,SMAD7,TRIM32
GO:BP	regulation of T cell proliferation	GO:0042129	FALSE	4.84E-07	6.31504	181	744	15	78724	CCR2,CD274,CD86,HLA-DMB,IL15,IL2,IL4I1,JAK2,LGALS9,NCKAP1L,PAWR,SLAMF1,SPTA1,TNFSF13B,ERBB2
GO:BP	B cell mediated immunity	GO:0019724	FALSE	4.96E-07	6.30467	212	744	16	78724	AICDA,BTK,C1QA,C1QC,C5,CD19,CD40,FCGR2B,IL2,IRF7,SANBR,SERPING1,SWAP70,IL2RB,MAD2L2,TBX21
GO:BP	positive regulation of T cell proliferation	GO:0042102	FALSE	5.17E-07	6.28666	102	744	12	78724	CCR2,CD274,CD86,HLA-DMB,IL15,IL2,JAK2,LGALS9,NCKAP1L,SLAMF1,SPTA1,TNFSF13B
GO:BP	protein polyubiquitination	GO:0000209	FALSE	5.30E-07	6.27572	280	744	18	78724	DDX3X,DTX3L,HERC5,IFI27,MARCHF1,MARCHF8,NT5C2,SASH1,TRIM22,TRIM38,TRIM5,TRIM58,UBE2L6,ARRDC4,AXIN1,DDA1,MKRN3,TRIM32
GO:BP	synapse organization	GO:0050808	FALSE	5.50E-07	6.25989	563	744	25	78724	ARHGAP44,C1QA,C1QB,C1QC,CACNA2D3,DOCK4,FCGR2B,GPC4,NLGN1,PDLIM5,PTPRF,PTPRO,SLC8A3,SLITRK4,SNCA,AKT1,AMIGO1,CDK5R1,CYFIP2,DAB1,EEF2K,ERBB2,F2R,NECTIN1,NRCAM
GO:BP	purine-containing compound metabolic process	GO:0072521	FALSE	5.50E-07	6.25989	563	744	25	78724	ABCG2,ACOT9,ADCY6,ATP1B1,HSD17B4,IDH1,KMO,LACC1,NDUFV3,NME4,NT5C2,SNCA,ZBTB20,ACOT2,AK5,DDIT4,LRGUK,NDUFA13,NDUFB8,NME3,NUDT13,PDE9A,PFKFB1,PTGDR,SULT1E1
GO:BP	positive regulation of leukocyte mediated immunity	GO:0002705	FALSE	5.60E-07	6.25173	154	744	14	78724	BTK,CD1C,CD40,CLEC7A,HLA-DRA,IL2,RSAD2,SCIMP,SLAMF1,CD1B,KLRD1,MAD2L2,SH2D1B,TBX21
GO:BP	carboxylic acid transport	GO:0046942	FALSE	5.67E-07	6.24621	355	744	20	78724	ABCG2,FOLR2,FOLR3,KMO,MAP2K6,NTSR1,SLC16A4,SLC1A3,SLC26A8,SLC38A5,SLC38A9,SLC7A7,SNCA,TSPO2,AKT1,LLGL2,PER2,PTGES,SLC25A29,SLC25A32
GO:BP	organic acid transport	GO:0015849	FALSE	5.96E-07	6.2249	356	744	20	78724	ABCG2,FOLR2,FOLR3,KMO,MAP2K6,NTSR1,SLC16A4,SLC1A3,SLC26A8,SLC38A5,SLC38A9,SLC7A7,SNCA,TSPO2,AKT1,LLGL2,PER2,PTGES,SLC25A29,SLC25A32
GO:BP	positive regulation of endocytosis	GO:0045807	FALSE	6.10E-07	6.21438	155	744	14	78724	BTK,CD151,CLEC7A,FCGR2B,IL15,MIB1,NCKAP1L,NLGN1,SGIP1,SNCA,DLL1,EEF2K,IL2RB,TUB
GO:BP	negative regulation of adaptive immune response based on somatic recombination of immune receptors built from immunoglobulin superfamily domains	GO:0002823	FALSE	6.60E-07	6.18014	62	744	10	78724	CD274,FCGR2B,IL2,IL4I1,NCKAP1L,SLAMF1,ASCL2,KLRD1,SMAD7,TBX21
GO:BP	CD4-positive, alpha-beta T cell activation	GO:0035710	FALSE	6.67E-07	6.17608	129	744	13	78724	CD274,CD86,CTSL,HLA-DRA,IL2,LGALS9,NCKAP1L,RSAD2,ASCL2,NKG7,SMAD7,TBX21,ZFPM1
GO:BP	response to peptide hormone	GO:0043434	FALSE	7.12E-07	6.14727	440	744	22	78724	AANAT,ADCY6,BCAR3,CAV1,CYBB,GCNT1,GNAS,INHBB,JAK2,KDM6A,PHIP,PNPT1,RB1,STAT1,STAT2,TNFSF10,AKT1,CDO1,EEF2K,GNRHR,PDE3B,PFKFB1
GO:BP	negative regulation of T cell mediated immunity	GO:0002710	FALSE	7.13E-07	6.14698	31	744	8	78724	CD274,FCGR2B,IL4I1,NCKAP1L,SLAMF1,KLRD1,SMAD7,TBX21
GO:BP	regulation of DNA-binding transcription factor activity	GO:0051090	FALSE	7.25E-07	6.13959	322	744	19	78724	AIM2,BTK,CD40,CLEC7A,EIF2AK2,IRAK3,LGALS9,PLPP3,RB1,SP100,TRIM22,TRIM38,TRIM5,AKT1,MAD2L2,PRMT2,RHEBL1,TRADD,TRIM32
GO:BP	response to oxidative stress	GO:0006979	FALSE	7.40E-07	6.13053	400	744	21	78724	BTK,GCH1,HGF,IDH1,JAK2,PAWR,PNPT1,SNCA,STAT1,USP25,VRK2,WNT16,AKT1,DGKK,MAPK9,PDGFD,PLK3,PRR5L,SELENOP,SMPD3,TRIM32
GO:BP	positive regulation of B cell proliferation	GO:0030890	FALSE	8.26E-07	6.08325	46	744	9	78724	BTK,CD40,IL2,IL7,NCKAP1L,PRLR,TNFSF13B,CD320,NFATC2
GO:BP	negative regulation of leukocyte activation	GO:0002695	FALSE	9.54E-07	6.02026	190	744	15	78724	BANK1,BTK,CD274,DUSP3,FCGR2B,IL2,IL31RA,IL4I1,LGALS9,MILR1,PAWR,ASCL2,ERBB2,SMAD7,TBX21
GO:BP	inorganic ion homeostasis	GO:0098771	FALSE	9.78E-07	6.00983	534	744	24	78724	ACO1,ALAS2,ATP1B1,CALB1,CAV1,CCR2,CD19,CD40,CLIC2,CXCL10,CXCL9,EIF2AK1,FECH,GLRX5,HEXB,NTSR1,SLC1A3,SLC8A3,SNCA,F2R,GRID2IP,PLCH2,SLC12A1,TSPOAP1
GO:BP	response to growth factor	GO:0070848	FALSE	9.89E-07	6.00465	721	744	28	78724	CAV1,DUSP3,FSTL1,GCNT2,HGF,HHEX,HSPB1,KDM6A,SMAD1,SOX6,WNT10A,ACVR2B,AKT1,AXIN1,CYFIP2,DDIT4,DLL1,EEF2K,ERBB2,FAT4,FEZ1,GDF9,NDN,PDGFD,PTP4A3,SMAD7,SMPD3,SPRED3
GO:BP	antigen processing and presentation of exogenous antigen	GO:0019884	FALSE	1.01254E-06	5.99459	47	744	9	78724	CD1C,CTSE,CTSL,CTSV,FCGR2B,HLA-DMA,HLA-DMB,HLA-DRA,CD1B
GO:BP	regulation of establishment of protein localization	GO:0070201	FALSE	1.09242E-06	5.96161	537	744	24	78724	ARHGAP44,FFAR2,GNAS,GOLPH3L,IFI27,INHBB,JAK2,RSAD2,SP100,TRPM4,ADTRP,AKAP5,BAG3,CDK5R1,ERBB2,EXPH5,F2R,GZMB,HSPA1L,PER2,PLK3,PRR5L,PTP4A3,SIAH3
GO:BP	T cell activation involved in immune response	GO:0002286	FALSE	1.17648E-06	5.92942	135	744	13	78724	CD1C,CD86,FCGR2B,HLA-DMB,HLA-DRA,IFNE,IL2,LGALS9,NCKAP1L,ASCL2,SMAD7,TBX21,ZFPM1
GO:BP	response to interferon-alpha	GO:0035455	FALSE	1.21178E-06	5.91658	21	744	7	78724	ADAR,BST2,EIF2AK2,IFITM3,LAMP3,MX2,OAS1
GO:BP	negative regulation of transport	GO:0051051	FALSE	1.25946E-06	5.89982	412	744	21	78724	C9ORF72,CAV1,CCR2,CLIC2,FCGR2B,FFAR2,INHBB,LGALS9,MAOB,NCKAP1L,NRG1,NTSR1,PLSCR1,RSAD2,SESTD1,SNCA,SP100,ADTRP,AKT1,F2R,TACR2
GO:BP	import across plasma membrane	GO:0098739	FALSE	1.36957E-06	5.86342	195	744	15	78724	ATP1B1,CACNA1A,CACNA1E,MS4A1,NTSR1,SLC1A3,SLC38A5,SLC8A3,SLC9A9,TRPM4,TSPO2,AKAP5,AKT1,PER2,SLC12A1
GO:BP	antigen receptor-mediated signaling pathway	GO:0050851	FALSE	1.36957E-06	5.86342	195	744	15	78724	BANK1,BLNK,BTK,CD19,CD22,DUSP3,FCGR2B,GBP1,MS4A1,NCKAP1L,PAWR,CD247,NFATC2,SKAP1,TXK
GO:BP	negative regulation of adaptive immune response	GO:0002820	FALSE	1.46015E-06	5.8356	67	744	10	78724	CD274,FCGR2B,IL2,IL4I1,NCKAP1L,SLAMF1,ASCL2,KLRD1,SMAD7,TBX21
GO:BP	positive regulation of B cell activation	GO:0050871	FALSE	1.47598E-06	5.83092	88	744	11	78724	BTK,CD40,IL2,IL7,NCKAP1L,PRLR,TNFSF13B,CD320,MAD2L2,NFATC2,TBX21
GO:BP	signal release	GO:0023061	FALSE	1.48753E-06	5.82753	501	744	23	78724	BTK,EXOC3L1,FFAR2,GNAS,IL1RN,INHBB,JAK2,KMO,MAOB,MAP2K6,NLGN1,SNCA,TRPM4,ACVR2B,F2R,GDF9,GNRHR,NKX3-1,PER2,PTGES,SMPD3,TACR2,TSPOAP1
GO:BP	modification-dependent protein catabolic process	GO:0019941	FALSE	1.49661E-06	5.82489	638	744	26	78724	DCAF12,DTX3L,HERC5,HERC6,IFI27,ISG15,MIB1,NUB1,SIAH2,TRIM38,TRIM58,UBE2L6,USP25,AKT1,AXIN1,DDA1,FBXL18,FBXW5,KLHDC3,MAPK9,SH3RF3,SIAH3,SMAD7,TBX21,TP53INP2,TRIM32
GO:BP	regulation of cell junction assembly	GO:1901888	FALSE	1.5141E-06	5.81984	263	744	17	78724	CAV1,DOCK4,DUSP3,GPC4,NLGN1,PDLIM5,S100A10,SLITRK4,SNCA,AMIGO1,CYFIP2,DAPK3,EEF2K,FMN1,LDB1,NECTIN1,PHLDB2
GO:BP	response to ketone	GO:1901654	FALSE	1.53536E-06	5.81379	229	744	16	78724	AANAT,ADCY6,BCL2L1,CAV1,CYBB,FECH,GNAS,JAK2,MAOB,NASP,XRN1,AKR1C3,AKT1,DDIT4,NKX3-1,PTGDR
GO:BP	regulation of protein ubiquitination	GO:0031396	FALSE	1.57767E-06	5.80198	197	744	15	78724	CAV1,DDX3X,DTX3L,ISG15,SASH1,SIAH2,AKT1,ARRDC4,AXIN1,MAD2L2,MAPK9,PER2,RASSF1,SMAD7,WASHC1
GO:BP	morphogenesis of an epithelium	GO:0002009	FALSE	1.60519E-06	5.79447	503	744	23	78724	ARHGAP24,CC2D2A,CCDC39,CD151,CSMD1,CXCL10,HESX1,HGF,KDM6A,MIB1,SEMA3C,STARD13,STAT1,WNT10A,WNT16,AJAP1,DLL1,FAT4,FMN1,NKX3-1,PHLDB2,ST14,TMEM79
GO:BP	regulation of calcium ion transmembrane transport	GO:1903169	FALSE	1.63424E-06	5.78669	167	744	14	78724	ATP1B1,CAV1,CD19,CLIC2,CXCL10,CXCL9,MS4A1,NTSR1,SESTD1,SNCA,AKAP5,F2R,RGS9,STAC
GO:BP	carbohydrate derivative biosynthetic process	GO:1901137	FALSE	1.64417E-06	5.78405	594	744	25	78724	ADCY6,C1GALT1,CMPK2,DSE,GALNT5,GALNTL6,GCNT1,GCNT2,GK,IL15,NDUFV3,NME4,PAWR,PIGN,UGT8,AK5,B4GALT4,CHST13,GAL3ST4,GALNT12,MGAT4A,NDUFA13,NDUFB8,NME3,SMPD3
GO:BP	modification-dependent macromolecule catabolic process	GO:0043632	FALSE	1.76155E-06	5.75411	643	744	26	78724	DCAF12,DTX3L,HERC5,HERC6,IFI27,ISG15,MIB1,NUB1,SIAH2,TRIM38,TRIM58,UBE2L6,USP25,AKT1,AXIN1,DDA1,FBXL18,FBXW5,KLHDC3,MAPK9,SH3RF3,SIAH3,SMAD7,TBX21,TP53INP2,TRIM32
GO:BP	negative regulation of secretion	GO:0051048	FALSE	1.76744E-06	5.75265	168	744	14	78724	C9ORF72,CCR2,FCGR2B,FFAR2,INHBB,LGALS9,MAOB,NCKAP1L,NRG1,RSAD2,SNCA,ADTRP,F2R,TACR2
GO:BP	multicellular organismal reproductive process	GO:0048609	FALSE	1.80711E-06	5.74302	1000	744	33	78724	ADAM28,BCL2L1,CCNA1,CFAP54,CSMD1,DDX3X,FANCL,FOLR2,FOLR3,HEXB,HORMAD1,INHBB,LGALS9,MAP2K6,PAX5,RB1,SLC26A8,SMAD1,SMCHD1,STRBP,TDRD1,TDRD7,TPPP3,TTC21A,YBX3,ZFX,AKT1,CBS,GDF9,LRGUK,NDN,PTGDR2,TSGA10
GO:BP	embryo development ending in birth or egg hatching	GO:0009792	FALSE	1.81506E-06	5.74111	692	744	27	78724	BCL2L1,CC2D2A,DIAPH3,E2F8,HORMAD1,KDM6A,MIB1,NASP,PAX5,RBBP8,RICTOR,SEMA3C,TENT5C,YBX3,ZFAND5,AKT1,APBA2,ASCL2,AXIN1,CDK5R1,DLL1,DYNC2I1,MAFF,MFNG,NKX3-1,NLE1,ST14
GO:BP	muscle structure development	GO:0061061	FALSE	1.87207E-06	5.72768	693	744	27	78724	BHLHE41,CASP7,CAV1,COL19A1,CXCL10,CXCL9,MBNL3,NRG1,PAX5,PDLIM5,RB1,SMAD1,SMTNL1,SOX6,TMOD2,YBX3,AKT1,DLL1,MAFF,MYBPH,MYEF2,NFATC2,NR1D2,SCGB3A1,SMAD7,TRIM32,ZFPM1
GO:BP	positive regulation of protein-containing complex assembly	GO:0031334	FALSE	2.08319E-06	5.68127	201	744	15	78724	BTK,CLEC7A,DDX3X,ISG15,NAV3,NCKAP1L,NRG1,RICTOR,SNCA,TPPP3,WARS1,CDK5R1,FMN1,MAPK9,SKAP1
GO:BP	negative regulation of leukocyte cell-cell adhesion	GO:1903038	FALSE	2.20268E-06	5.65705	142	744	13	78724	CD274,DUSP3,IL2,IL4I1,LGALS9,PAWR,ADTRP,AKT1,ASCL2,CCL28,ERBB2,SMAD7,TBX21
GO:BP	positive regulation of monoatomic ion transport	GO:0043270	FALSE	2.23085E-06	5.65153	202	744	15	78724	ATP1B1,CAV1,CCR2,CD19,CXCL10,CXCL9,MS4A1,NTSR1,SNCA,AKAP5,AKT1,AMIGO1,F2R,STAC,TACR2
GO:BP	positive regulation of monoatomic ion transmembrane transport	GO:0034767	FALSE	2.40214E-06	5.6194	143	744	13	78724	ATP1B1,CAV1,CCR2,CD19,CXCL10,CXCL9,MS4A1,NTSR1,SNCA,AKAP5,AMIGO1,F2R,STAC
GO:BP	leukocyte mediated cytotoxicity	GO:0001909	FALSE	2.40214E-06	5.6194	143	744	13	78724	CD1C,FCGR2B,HLA-DRA,LGALS9,LYST,NCKAP1L,CD1B,GZMB,GZMM,KIR3DL1,KLRD1,NKG7,PRF1
GO:BP	plasma membrane organization	GO:0007009	FALSE	2.40525E-06	5.61884	172	744	14	78724	ANO5,CASP7,CAV1,EPB41L3,FOLR2,FOLR3,NSF,PLSCR1,PLSCR4,S100A10,SPTA1,XKR9,AKT1,FAT4
GO:BP	vascular process in circulatory system	GO:0003018	FALSE	2.52489E-06	5.59776	272	744	17	78724	ABCG2,ADCY6,CAV1,DDAH1,DOCK4,GCH1,SLC1A3,SLC38A5,SLC44A1,SMTNL1,TRPM4,CBS,F2R,MANF,PER2,PTP4A3,TACR2
GO:BP	regulation of synapse organization	GO:0050807	FALSE	2.55755E-06	5.59218	309	744	18	78724	ARHGAP44,CACNA2D3,DOCK4,FCGR2B,GPC4,NLGN1,PDLIM5,PTPRO,SLITRK4,SNCA,AKT1,AMIGO1,CDK5R1,CYFIP2,DAB1,EEF2K,NECTIN1,NRCAM
GO:BP	DNA damage response	GO:0006974	FALSE	2.62098E-06	5.58154	908	744	31	78724	AIM2,AUNIP,BCL2L1,CHEK2,CIP2A,DDIAS,DTX3L,FANCL,IFI16,IRF7,MAP2K6,MAP3K20,MBD4,PARP9,POLK,RBBP8,SMC6,SMCHD1,SP100,DDIT4,MAD2L2,MUS81,MYO6,NFATC2,NKX3-1,NME3,NPAS2,PHF1,PLK3,RASSF1,TRIM32
GO:BP	interleukin-27-mediated signaling pathway	GO:0070106	FALSE	2.74628E-06	5.56125	7	744	5	78724	MX1,OAS1,OAS2,OASL,STAT1
GO:BP	muscle contraction	GO:0006936	FALSE	2.75885E-06	5.55927	349	744	19	78724	ATP1B1,CAV1,CLCN1,CLIC2,DOCK4,MAP2K6,SCN9A,SLC8A3,SSPN,TMOD2,TRPM4,DAPK3,F2R,MYBPH,NMUR1,SCN2A,SMAD7,STAC,TACR2
GO:BP	intrinsic apoptotic signaling pathway	GO:0097193	FALSE	2.97934E-06	5.52588	312	744	18	78724	BCL2L1,CAV1,CHEK2,DDIAS,DDX3X,FCGR2B,HSPB1,IFI16,IFI6,JAK2,KDM6A,YBX3,ZNF385B,AKT1,DDIT4,NKX3-1,SCN2A,TRIM32
GO:BP	calcium ion transport	GO:0006816	FALSE	3.17973E-06	5.49761	434	744	21	78724	ATP1B1,CACNA1A,CACNA1E,CACNA2D3,CALCRL,CAV1,CD19,CLIC2,CXCL10,CXCL9,MS4A1,NTSR1,SESTD1,SLC8A3,SNCA,TRPM4,AKAP5,F2R,PLCH2,RGS9,STAC
GO:BP	lipid catabolic process	GO:0016042	FALSE	3.48516E-06	5.45778	354	744	19	78724	GLYATL2,HEXB,HSD17B4,HSD17B6,IDH1,PLPP3,PNPLA4,SMPDL3A,ACADVL,ADTRP,AKR1C3,AKT1,HINT2,PAFAH2,PDE3B,PLCH2,PNPLA7,SMPD3,SULT1E1
GO:BP	regulation of synapse structure or activity	GO:0050803	FALSE	3.64192E-06	5.43867	316	744	18	78724	ARHGAP44,CACNA2D3,DOCK4,FCGR2B,GPC4,NLGN1,PDLIM5,PTPRO,SLITRK4,SNCA,AKT1,AMIGO1,CDK5R1,CYFIP2,DAB1,EEF2K,NECTIN1,NRCAM
GO:BP	negative regulation of secretion by cell	GO:1903531	FALSE	3.66782E-06	5.43559	148	744	13	78724	C9ORF72,CCR2,FCGR2B,FFAR2,INHBB,LGALS9,MAOB,NCKAP1L,RSAD2,SNCA,ADTRP,F2R,TACR2
GO:BP	muscle system process	GO:0003012	FALSE	3.73942E-06	5.4272	438	744	21	78724	ATP1B1,CAV1,CLCN1,CLIC2,DOCK4,MAP2K6,PDLIM5,SCN9A,SLC8A3,SSPN,TMOD2,TRPM4,DAPK3,F2R,MYBPH,NMUR1,PDE9A,SCN2A,SMAD7,STAC,TACR2
GO:BP	cellular response to chemical stress	GO:0062197	FALSE	3.82758E-06	5.41708	317	744	18	78724	BTK,CASP1,CAV1,DDX3X,GCH1,HGF,PAWR,PNPT1,SNCA,VRK2,WNT16,YBX3,AKT1,MAPK9,PDGFD,PRR5L,SCN2A,SMPD3
GO:BP	negative regulation of cell activation	GO:0050866	FALSE	4.33236E-06	5.36328	212	744	15	78724	BANK1,BTK,CD274,DUSP3,FCGR2B,IL2,IL31RA,IL4I1,LGALS9,MILR1,PAWR,ASCL2,ERBB2,SMAD7,TBX21
GO:BP	positive regulation of type II interferon production	GO:0032729	FALSE	4.56045E-06	5.34099	75	744	10	78724	CCR2,CLEC7A,IL2,ISG15,JAK2,LGALS9,SLAMF1,TLR7,TXK,ZFPM1
GO:BP	regulation of binding	GO:0051098	FALSE	4.6203E-06	5.33533	213	744	15	78724	CLIC2,DTX3L,IFI16,IFIT1,IFIT2,JAK2,MAP2,PARP9,PTPRF,RB1,SP100,AKT1,MAD2L2,PER2,ZFPM1
GO:BP	calcium ion transmembrane import into cytosol	GO:0097553	FALSE	4.6719E-06	5.33051	181	744	14	78724	CACNA1A,CACNA1E,CAV1,CD19,CLIC2,CXCL10,CXCL9,MS4A1,NTSR1,SLC8A3,SNCA,AKAP5,F2R,PLCH2
GO:BP	kidney development	GO:0001822	FALSE	4.89412E-06	5.31033	322	744	18	78724	C1GALT1,CALB1,CC2D2A,COL4A3,GCNT1,KANK2,MMP17,PTPRO,SMAD1,STAT1,ACVR2B,DLL1,FAT4,FMN1,NKX3-1,NLE1,PDGFD,SMAD7
GO:BP	protein-containing complex assembly	GO:0065003	FALSE	5.00986E-06	5.30017	3238	744	67	78724	ADAR,AIM2,BCL11A,BTK,CASP1,CCDC39,CD40,CLEC7A,DDX3X,DIAPH3,DNAH8,DNM1,EIF2AK2,EIF2S3,EIF2S3B,FECH,GBP1,GCH1,H4C1,HLA-DMA,HLA-DMB,HLA-DRA,IFIH1,ISG15,JAK2,KANK2,MAP2,MLKL,MS4A1,NASP,NAV3,NCKAP1L,NRG1,OAS1,ODAD4,PNPT1,PRLR,RB1,RICTOR,RIOK3,SETSIP,SNCA,SPTA1,TCF4,TMOD2,TPPP3,TRPM4,WARS1,ZRSR2,AXIN1,CAND2,CD247,CDK5R1,CYFIP2,FMN1,IL2RB,MAPK9,MED27,NAA60,NAP1L5,NDUFA13,NDUFB8,NLE1,PARD6B,PRF1,SKAP1,TR…
GO:BP	ubiquitin-dependent protein catabolic process	GO:0006511	FALSE	5.04073E-06	5.29751	628	744	25	78724	DCAF12,DTX3L,HERC5,HERC6,IFI27,MIB1,NUB1,SIAH2,TRIM38,TRIM58,UBE2L6,USP25,AKT1,AXIN1,DDA1,FBXL18,FBXW5,KLHDC3,MAPK9,SH3RF3,SIAH3,SMAD7,TBX21,TP53INP2,TRIM32
GO:BP	negative regulation of binding	GO:0051100	FALSE	5.29189E-06	5.27639	99	744	11	78724	IFI16,IFIT1,IFIT2,JAK2,MAP2,PTPRF,SP100,AKT1,MAD2L2,PER2,ZFPM1
GO:BP	lipid biosynthetic process	GO:0008610	FALSE	5.48949E-06	5.26047	729	744	27	78724	ABCG2,CHEK2,DHRS9,GK,HEXB,HSD17B6,IDH1,PIGN,PIP5K1B,PLSCR1,PRLR,SLC44A1,SPTLC2,UGT8,ZBTB20,ACADVL,AKR1C3,AKT1,B4GALT4,DGKK,DGKQ,DHCR24,DHRS11,GAL3ST4,HINT2,PTGES,SYNJ2
GO:BP	regulation of mitotic cell cycle	GO:0007346	FALSE	5.57847E-06	5.25349	492	744	22	78724	CHEK2,DDX3X,DUSP3,KANK2,MAP3K20,PHIP,PKN2,PSME2,RB1,RBBP8,AKT1,CCND3,DAPK3,FBXW5,MAD2L2,MUS81,NKX3-1,NLE1,PLK3,PRMT2,SMPD3,TOM1L2
GO:BP	nucleotide metabolic process	GO:0009117	FALSE	5.78799E-06	5.23747	493	744	22	78724	ADCY6,ATP1B1,CMPK2,IDH1,KMO,LACC1,MBD4,NDUFV3,NME4,NT5C2,PUDP,ZBTB20,AK5,DDIT4,LRGUK,NDUFA13,NDUFB8,NME3,NUDT13,PDE9A,PFKFB1,SULT1E1
GO:BP	temperature homeostasis	GO:0001659	FALSE	6.19926E-06	5.20766	185	744	14	78724	ALDH1A1,CAV1,CCR2,GNAS,IL15,JAK2,MAP2K6,NTSR1,PRLR,RB1,ACADVL,ACVR2B,PER2,PTGES
GO:BP	positive regulation of phosphatidylinositol 3-kinase/protein kinase B signal transduction	GO:0051897	FALSE	6.64612E-06	5.17743	186	744	14	78724	CD19,GCNT2,HGF,JAK2,PIK3AP1,RICTOR,WNT16,AKR1C3,CHI3L1,F2R,NKX3-1,PDGFD,PRR5,PRR5L
GO:BP	mitotic cell cycle	GO:0000278	FALSE	6.76912E-06	5.16947	892	744	30	78724	CCNA1,CDK14,CHEK2,DDX3X,DUSP3,E2F8,HGF,KANK2,MAP3K20,NFIB,PHIP,PKN2,PSME2,RB1,RBBP8,TUBB6,AKT1,CCNB3,CCND3,DAPK3,FBXW5,KIFC2,MAD2L2,MUS81,NKX3-1,NLE1,PLK3,PRMT2,SMPD3,TOM1L2
GO:BP	regulation of protein catabolic process	GO:0042176	FALSE	6.86277E-06	5.1635	369	744	19	78724	CAV1,CHEK2,IRAK3,LAMP3,NSF,NUB1,PSME2,SNCA,USP25,AKT1,AXIN1,DDA1,MAD2L2,MAPK9,NDUFA13,PLK3,SH3RF3,SMAD7,TRIM32
GO:BP	regulation of extrinsic apoptotic signaling pathway	GO:2001236	FALSE	6.98409E-06	5.15589	156	744	13	78724	BCL2L1,CAV1,DDX3X,HGF,IFI6,IL7,NRG1,PHIP,SIAH2,SP100,STRADB,TNFSF10,AKT1
GO:BP	gland development	GO:0048732	FALSE	7.02491E-06	5.15336	454	744	21	78724	CAV1,CCDC39,CSMD1,E2F8,EAF2,HESX1,HGF,INHBB,JAK2,NFIB,NRG1,OAS2,PNPT1,PRLR,SEMA3C,WNT10A,AKT1,CDO1,FPGS,LBH,NKX3-1
GO:BP	negative regulation of lymphocyte mediated immunity	GO:0002707	FALSE	7.21355E-06	5.14185	58	744	9	78724	CD274,FCGR2B,IL4I1,LGALS9,NCKAP1L,SLAMF1,KLRD1,SMAD7,TBX21
GO:BP	small molecule catabolic process	GO:0044282	FALSE	7.49251E-06	5.12537	371	744	19	78724	AICDA,DDAH1,GK,GLYATL2,HNMT,HSD17B4,HSD17B6,IL4I1,KMO,NTSR1,SDSL,ACADVL,ADTRP,AKR1C3,AKT1,CARNS1,CBS,CDO1,SULT1E1
GO:BP	renal system development	GO:0072001	FALSE	7.89354E-06	5.10273	332	744	18	78724	C1GALT1,CALB1,CC2D2A,COL4A3,GCNT1,KANK2,MMP17,PTPRO,SMAD1,STAT1,ACVR2B,DLL1,FAT4,FMN1,NKX3-1,NLE1,PDGFD,SMAD7
GO:BP	CD4-positive, alpha-beta T cell differentiation	GO:0043367	FALSE	8.09254E-06	5.09192	103	744	11	78724	CD86,CTSL,HLA-DRA,IL2,LGALS9,NCKAP1L,RSAD2,ASCL2,SMAD7,TBX21,ZFPM1
GO:BP	organic anion transport	GO:0015711	FALSE	8.50641E-06	5.07025	459	744	21	78724	ABCG2,CALHM6,FOLR2,FOLR3,KMO,MAP2K6,NTSR1,SLC16A4,SLC1A3,SLC26A8,SLC38A5,SLC38A9,SLC7A7,SNCA,TSPO2,AKT1,LLGL2,PER2,PTGES,SLC25A29,SLC25A32
GO:BP	positive regulation of calcium ion transmembrane transport	GO:1904427	FALSE	8.68241E-06	5.06136	80	744	10	78724	CAV1,CD19,CXCL10,CXCL9,MS4A1,NTSR1,SNCA,AKAP5,F2R,STAC
GO:BP	cell recognition	GO:0008037	FALSE	8.80552E-06	5.05524	159	744	13	78724	CLEC7A,FOLR2,FOLR3,NEXN,AMIGO1,CDK5R1,HSPA1L,NDN,NRCAM,OVGP1,PRF1,SPON2,TUB
GO:BP	actin filament organization	GO:0007015	FALSE	9.17636E-06	5.03733	461	744	21	78724	C9ORF72,DIAPH3,GAS2L3,JAK2,KANK2,NCKAP1L,PAWR,RICTOR,S100A10,SPTA1,SWAP70,TMOD2,CYFIP2,FMN1,MAD2L2,MYO6,PHLDB2,RHOF,TMSB15B,WASH6P,WASHC1
GO:BP	regulation of actin filament-based process	GO:0032970	FALSE	9.3079E-06	5.03115	376	744	19	78724	ARHGAP44,BST2,C9ORF72,CAV1,KANK2,NCKAP1L,RICTOR,S100A10,SPTA1,SWAP70,TMOD2,TRPM4,CDK5R1,CYFIP2,DAPK3,FMN1,PHLDB2,RHOF,WASHC1
GO:BP	positive regulation of cation transmembrane transport	GO:1904064	FALSE	9.4624E-06	5.024	131	744	12	78724	ATP1B1,CAV1,CD19,CXCL10,CXCL9,MS4A1,NTSR1,SNCA,AKAP5,AMIGO1,F2R,STAC
GO:BP	response to nutrient levels	GO:0031667	FALSE	1.06808E-05	4.9714	510	744	22	78724	CAV1,CD40,CXCL10,CYBB,EIF2AK1,EIF2AK2,FOLR2,IFI16,INHBB,KANK2,KDM6A,RASAL2,RICTOR,SGIP1,STAT1,AKR1C3,AKT1,CBS,CCL28,PFKFB1,PRR5,TRIM32
GO:BP	regulation of translation	GO:0006417	FALSE	1.1044E-05	4.95687	380	744	19	78724	ACO1,BANK1,DDX3X,EIF2AK1,EIF2AK2,FECH,HSPB1,MAP3K20,NSUN3,SAMD4A,XRN1,YBX3,AKT1,DAPK3,EEF2K,ERBB2,GZMB,PARP16,SARNP
GO:BP	positive regulation of lymphocyte mediated immunity	GO:0002708	FALSE	1.12463E-05	4.94899	133	744	12	78724	BTK,CD1C,CD40,HLA-DRA,IL2,RSAD2,SLAMF1,CD1B,KLRD1,MAD2L2,SH2D1B,TBX21
GO:BP	response to steroid hormone	GO:0048545	FALSE	1.14274E-05	4.94205	340	744	18	78724	AANAT,CAV1,CYBB,FECH,IDH1,IL1RN,JAK2,KANK2,MAOB,ADTRP,AKR1C3,CDO1,DDIT4,ESRRA,LBH,NKX3-1,PFKFB1,PRMT2
GO:BP	synaptic signaling	GO:0099536	FALSE	1.15139E-05	4.93878	807	744	28	78724	ARHGAP44,CACNA1A,CACNA1E,CALB1,CCR2,DNM1,JAK2,KMO,NLGN1,NTSR1,PNOC,SLC1A3,SLC8A3,SNCA,SYPL1,TMOD2,AKAP5,AKT1,APBA2,CDK5R1,F2R,GPR176,GRID2IP,MAPK9,PDE9A,S100B,TACR2,TSPOAP1
GO:BP	antigen processing and presentation of exogenous peptide antigen via MHC class II	GO:0019886	FALSE	1.16501E-05	4.93367	28	744	7	78724	CTSE,CTSL,CTSV,FCGR2B,HLA-DMA,HLA-DMB,HLA-DRA
GO:BP	immunoglobulin production	GO:0002377	FALSE	1.21499E-05	4.91543	107	744	11	78724	AICDA,BTK,CD22,CD40,CD86,FCGR2B,IL2,SANBR,SWAP70,MAD2L2,TBX21
GO:BP	regulation of supramolecular fiber organization	GO:1902903	FALSE	1.25373E-05	4.9018	383	744	19	78724	C9ORF72,DIAPH3,KANK2,MAP2,NAV3,NCKAP1L,RB1,RICTOR,S100A10,SNCA,SPTA1,SWAP70,TMOD2,CDK5R1,CYFIP2,DAPK3,FMN1,PHLDB2,WASHC1
GO:BP	negative regulation of lymphocyte activation	GO:0051250	FALSE	1.28147E-05	4.89229	164	744	13	78724	BANK1,BTK,CD274,DUSP3,FCGR2B,IL2,IL4I1,LGALS9,PAWR,ASCL2,ERBB2,SMAD7,TBX21
GO:BP	intracellular calcium ion homeostasis	GO:0006874	FALSE	1.33675E-05	4.87395	304	744	17	78724	ATP1B1,CALB1,CAV1,CCR2,CD19,CD40,CLIC2,CXCL10,CXCL9,HEXB,NTSR1,SLC8A3,SNCA,F2R,GRID2IP,PLCH2,TSPOAP1
GO:BP	regulation of cytoskeleton organization	GO:0051493	FALSE	1.36428E-05	4.8651	517	744	22	78724	ARHGAP44,BST2,C9ORF72,DIAPH3,KANK2,MAP2,NAV3,NCKAP1L,NEXN,RICTOR,S100A10,SNCA,SPTA1,SWAP70,TMOD2,CDK5R1,CYFIP2,DAPK3,FMN1,PHLDB2,RHOF,WASHC1
GO:BP	rhythmic process	GO:0048511	FALSE	1.40338E-05	4.85283	305	744	17	78724	AANAT,BHLHE41,KCNH7,MAP2K6,NLGN1,PROKR2,SCN9A,SIAH2,CDK5R1,GDF9,GPR176,MAPK9,NPAS2,NR1D2,NR2F6,PER2,PER3
GO:BP	cellular response to interleukin-1	GO:0071347	FALSE	1.40744E-05	4.85157	84	744	10	78724	CD40,GBP1,GBP3,IL1RN,INHBB,IRAK3,KMO,VRK2,ZBP1,NKX3-1
GO:BP	regulation of type I interferon-mediated signaling pathway	GO:0060338	FALSE	1.43737E-05	4.84243	44	744	8	78724	ADAR,IRF7,ISG15,OAS1,OAS3,STAT2,USP18,ZBP1
GO:BP	regulation of cellular response to stress	GO:0080135	FALSE	1.46197E-05	4.83506	519	744	22	78724	AUNIP,BCL2L1,CAV1,DDAH1,DDIAS,EIF2AK1,EIF2AK2,FCGR2B,FECH,GCH1,KDM6A,KIAA0319,MAP3K20,PTPRF,SCIMP,SMCHD1,USP25,YBX3,MAD2L2,MANF,NPAS2,TRIM32
GO:BP	regulation of leukocyte migration	GO:0002685	FALSE	1.65272E-05	4.7818	234	744	15	78724	C3AR1,C5,CCR2,CXCL10,GCNT1,LGALS9,NCKAP1L,SLAMF1,SWAP70,ADTRP,AKT1,ASCL2,CCL28,PDGFD,SMPD3
GO:BP	negative regulation of protein kinase activity	GO:0006469	FALSE	1.71002E-05	4.767	138	744	12	78724	ADAR,CAV1,DUSP3,HHEX,HSPB1,IRAK3,RB1,SLC8A3,SNCA,WARS1,AKT1,ZFYVE28
GO:BP	microtubule cytoskeleton organization	GO:0000226	FALSE	1.81214E-05	4.74181	670	744	25	78724	AUNIP,CC2D2A,CCDC39,CCDC68,CHEK2,DIAPH3,DNAH8,GAS2L3,MAP2,NAV3,NCKAP5,ODAD4,SNCA,TPPP3,TUBB6,AXIN1,CDK5R1,FBXW5,KIFC2,LLGL2,LRGUK,NINL,PARD6B,PHLDB2,PLK3
GO:BP	positive regulation of cytosolic calcium ion concentration	GO:0007204	FALSE	1.84077E-05	4.735	169	744	13	78724	C3AR1,CACNA1A,CAV1,CCR2,CCRL2,FPR3,IL2,JAK2,SWAP70,TRPM4,CCL28,F2R,PTGDR
GO:BP	chordate embryonic development	GO:0043009	FALSE	1.86578E-05	4.72914	671	744	25	78724	BCL2L1,CC2D2A,DIAPH3,E2F8,HORMAD1,KDM6A,MIB1,NASP,PAX5,RBBP8,SEMA3C,TENT5C,YBX3,ZFAND5,AKT1,APBA2,ASCL2,AXIN1,DLL1,DYNC2I1,MAFF,MFNG,NKX3-1,NLE1,ST14
GO:BP	response to metal ion	GO:0010038	FALSE	1.86848E-05	4.72851	351	744	18	78724	AANAT,ACO1,CAV1,CPNE8,CYBB,FECH,HESX1,INHBB,MAOB,NLGN1,PLSCR1,SNCA,AKR1C3,AKT1,EEF2K,MAPK9,NFATC2,SMPD3
GO:BP	positive regulation of transmembrane transport	GO:0034764	FALSE	1.91376E-05	4.71811	202	744	14	78724	ATP1B1,CAV1,CCR2,CD19,CXCL10,CXCL9,MS4A1,NTSR1,SNCA,AKAP5,AKT1,AMIGO1,F2R,STAC
GO:BP	negative regulation of organelle organization	GO:0010639	FALSE	1.95207E-05	4.70951	352	744	18	78724	BCL2L1,DIAPH3,HGF,HORMAD1,KANK2,MAP2,NAV3,SNCA,SPTA1,SWAP70,TMOD2,XRN1,AKT1,FEZ1,MAD2L2,PHLDB2,TOM1L2,TRIM32
GO:BP	anterograde trans-synaptic signaling	GO:0098916	FALSE	1.96671E-05	4.70626	775	744	27	78724	ARHGAP44,CACNA1A,CACNA1E,CALB1,CCR2,DNM1,JAK2,KMO,NLGN1,NTSR1,PNOC,SLC1A3,SLC8A3,SNCA,SYPL1,TMOD2,AKAP5,AKT1,APBA2,F2R,GPR176,GRID2IP,MAPK9,PDE9A,S100B,TACR2,TSPOAP1
GO:BP	chemical synaptic transmission	GO:0007268	FALSE	1.96671E-05	4.70626	775	744	27	78724	ARHGAP44,CACNA1A,CACNA1E,CALB1,CCR2,DNM1,JAK2,KMO,NLGN1,NTSR1,PNOC,SLC1A3,SLC8A3,SNCA,SYPL1,TMOD2,AKAP5,AKT1,APBA2,F2R,GPR176,GRID2IP,MAPK9,PDE9A,S100B,TACR2,TSPOAP1
GO:BP	axon guidance	GO:0007411	FALSE	2.07478E-05	4.68303	238	744	15	78724	ANOS1,NEXN,NFIB,PTPRO,SEMA3C,CDK5R1,CYFIP2,ERBB2,FEZ1,LGR6,NCAM1,NECTIN1,NELL2,NRCAM,PLEKHG4
GO:BP	regulation of protein modification by small protein conjugation or removal	GO:1903320	FALSE	2.1946E-05	4.65864	239	744	15	78724	CAV1,DDX3X,DTX3L,ISG15,SASH1,SIAH2,AKT1,ARRDC4,AXIN1,MAD2L2,MAPK9,PER2,RASSF1,SMAD7,WASHC1
GO:BP	neuron projection guidance	GO:0097485	FALSE	2.1946E-05	4.65864	239	744	15	78724	ANOS1,NEXN,NFIB,PTPRO,SEMA3C,CDK5R1,CYFIP2,ERBB2,FEZ1,LGR6,NCAM1,NECTIN1,NELL2,NRCAM,PLEKHG4
GO:BP	cell cycle phase transition	GO:0044770	FALSE	2.27309E-05	4.64338	532	744	22	78724	CCNA1,CDK14,CHEK2,DDX3X,DTX3L,HORMAD1,KANK2,MAP3K20,NFIB,PARP9,PSME2,RB1,RBBP8,AKT1,CCNB3,CCND3,CCNQ,MAD2L2,MUS81,PLK3,PRMT2,RASSF1
GO:BP	trans-synaptic signaling	GO:0099537	FALSE	2.30551E-05	4.63723	781	744	27	78724	ARHGAP44,CACNA1A,CACNA1E,CALB1,CCR2,DNM1,JAK2,KMO,NLGN1,NTSR1,PNOC,SLC1A3,SLC8A3,SNCA,SYPL1,TMOD2,AKAP5,AKT1,APBA2,F2R,GPR176,GRID2IP,MAPK9,PDE9A,S100B,TACR2,TSPOAP1
GO:BP	anatomical structure maturation	GO:0071695	FALSE	2.33536E-05	4.63165	277	744	16	78724	BCL11A,BTK,C1QA,CLEC7A,DIAPH3,FAM210B,IL15,RB1,TDRD1,TDRD7,TRIM58,BFSP1,CDK5R1,FAT4,NRCAM,TMEM79
GO:BP	regulation of defense response to virus	GO:0050688	FALSE	2.34429E-05	4.62999	66	744	9	78724	AIM2,DTX3L,HERC5,IL15,NT5C2,PARP9,STAT1,TRIM22,TRIM38
GO:BP	positive regulation of response to cytokine stimulus	GO:0060760	FALSE	2.34429E-05	4.62999	66	744	9	78724	CASP1,IFIH1,IL7,IRF7,PARP14,PARP9,ZBP1,TRIM32,TXK
GO:BP	positive regulation of peptidyl-tyrosine phosphorylation	GO:0050731	FALSE	2.36162E-05	4.62679	142	744	12	78724	BANK1,CD40,IL15,IL2,IL31RA,JAK2,NRG1,PARP14,PARP9,PLPP3,RICTOR,DGKQ
GO:BP	nucleobase-containing compound catabolic process	GO:0034655	FALSE	2.51186E-05	4.6	535	744	22	78724	AICDA,ENTPD2,MBD4,NT5C2,OAS2,PNPT1,SAMD4A,SLFN12,SMPDL3A,TENT5A,TENT5C,XRN1,YBX3,ZBTB20,AKT1,DDIT4,MUS81,NUDT13,PDE9A,PFKFB1,PRR5L,WDR82
GO:BP	cellular component disassembly	GO:0022411	FALSE	2.74612E-05	4.56128	446	744	20	78724	C1QA,C1QB,C1QC,CTSV,DIAPH3,DUSP3,FAP,IRAK3,NAV3,NCKAP5,NSF,RUBCNL,SPTA1,SWAP70,TMOD2,TRIM58,DDIT4,EEF2K,PLK3,WASHC1
GO:BP	antigen processing and presentation	GO:0019882	FALSE	2.85461E-05	4.54445	116	744	11	78724	CD1C,CTSE,CTSL,CTSV,FCGR2B,HLA-DMA,HLA-DMB,HLA-DRA,MARCHF1,MARCHF8,CD1B
GO:BP	humoral immune response	GO:0006959	FALSE	2.85537E-05	4.54434	281	744	16	78724	BLNK,C1QA,C1QC,C5,CCR2,CXCL10,CXCL9,FCGR2B,IFNE,IL7,LYZ,MS4A1,SERPING1,CCL3L3,GNLY,SPON2
GO:BP	regulation of post-translational protein modification	GO:1901873	FALSE	2.89391E-05	4.53851	244	744	15	78724	CAV1,DDX3X,DTX3L,ISG15,SASH1,SIAH2,AKT1,ARRDC4,AXIN1,MAD2L2,MAPK9,PER2,RASSF1,SMAD7,WASHC1
GO:BP	myeloid leukocyte activation	GO:0002274	FALSE	2.89391E-05	4.53851	244	744	15	78724	BTK,C1QA,CCR2,FCGR2B,IFI35,IL15,IL31RA,JAK2,LGALS9,MILR1,PLSCR1,SLAMF1,SNCA,MRGPRX2,PTGDR
GO:BP	negative regulation of kinase activity	GO:0033673	FALSE	2.98822E-05	4.52459	145	744	12	78724	ADAR,CAV1,DUSP3,HHEX,HSPB1,IRAK3,RB1,SLC8A3,SNCA,WARS1,AKT1,ZFYVE28
GO:BP	antigen processing and presentation of peptide antigen	GO:0048002	FALSE	3.06915E-05	4.51298	68	744	9	78724	CTSE,CTSL,CTSV,FCGR2B,HLA-DMA,HLA-DMB,HLA-DRA,MARCHF1,MARCHF8
GO:BP	camera-type eye development	GO:0043010	FALSE	3.12798E-05	4.50474	363	744	18	78724	BCAR3,CALB1,CC2D2A,CRYBA1,DRAM2,HESX1,NFIB,TDRD7,WNT16,ACVR2B,BFSP1,DLL1,LAMC3,LIM2,NECTIN1,PER2,SPRED3,TUB
GO:BP	circadian rhythm	GO:0007623	FALSE	3.13191E-05	4.50419	210	744	14	78724	AANAT,BHLHE41,KCNH7,NLGN1,PROKR2,SCN9A,SIAH2,GPR176,MAPK9,NPAS2,NR1D2,NR2F6,PER2,PER3
GO:BP	regulation of cell growth	GO:0001558	FALSE	3.18732E-05	4.49657	406	744	19	78724	BCL11A,BST2,DDX3X,EAF2,IL2,KIAA0319,MAP2,NRG1,RB1,RICTOR,AKT1,ERBB2,GDF9,MAD2L2,NRCAM,PRR5,SCGB3A1,SMAD7,TRIM32
GO:BP	cell maturation	GO:0048469	FALSE	3.32562E-05	4.47813	211	744	14	78724	BCL11A,BTK,C1QA,CLEC7A,DIAPH3,FAM210B,IL15,RB1,TDRD1,TDRD7,TRIM58,BFSP1,NRCAM,TMEM79
GO:BP	small molecule biosynthetic process	GO:0044283	FALSE	3.47008E-05	4.45966	593	744	23	78724	ALDH1A1,CASP1,CHEK2,DHRS9,GCH1,KMO,NAIP,NTSR1,OSBPL1A,SDSL,SLC1A3,SNCA,SPTLC2,ACADVL,AKR1C3,CARNS1,CBS,CDO1,DGKQ,DHCR24,PER2,PFKFB1,PTGES
GO:BP	endolysosomal toll-like receptor signaling pathway	GO:0140894	FALSE	3.50853E-05	4.45487	49	744	8	78724	CAV1,DDX3X,OAS1,PIK3AP1,RSAD2,SCIMP,TLR7,WDFY1
GO:BP	protein autophosphorylation	GO:0046777	FALSE	3.66383E-05	4.43606	179	744	13	78724	CAV1,CHEK2,DDX3X,EIF2AK1,EIF2AK2,JAK2,MAP3K20,NRG1,VRK2,AKT1,DAPK3,EEF2K,TXK
GO:BP	regulation of cytoplasmic pattern recognition receptor signaling pathway	GO:0039531	FALSE	3.732E-05	4.42806	119	744	11	78724	BTK,CAV1,DDX3X,DDX60,EIF2AK2,OASL,RIOK3,RSAD2,SMPDL3A,WDFY1,AKT1
GO:BP	regulation of type II interferon production	GO:0032649	FALSE	4.07375E-05	4.39001	120	744	11	78724	CCR2,CD274,CLEC7A,IL2,ISG15,JAK2,LGALS9,SLAMF1,TLR7,TXK,ZFPM1
GO:BP	in utero embryonic development	GO:0001701	FALSE	4.17932E-05	4.37889	413	744	19	78724	BCL2L1,DIAPH3,E2F8,HORMAD1,KDM6A,MIB1,NASP,RBBP8,TENT5C,YBX3,ZFAND5,AKT1,APBA2,ASCL2,AXIN1,MAFF,MFNG,NLE1,ST14
GO:BP	disruption of cell in another organism	GO:0141061	FALSE	4.23446E-05	4.3732	94	744	10	78724	C5,CLEC7A,GBP1,GBP3,LYZ,GNLY,GZMB,GZMM,NKG7,PRF1
GO:BP	killing of cells of another organism	GO:0031640	FALSE	4.23446E-05	4.3732	94	744	10	78724	C5,CLEC7A,GBP1,GBP3,LYZ,GNLY,GZMB,GZMM,NKG7,PRF1
GO:BP	Wnt signaling pathway	GO:0016055	FALSE	4.25307E-05	4.3713	458	744	20	78724	CAV1,CDK14,DDX3X,DEPDC1B,GPC4,HESX1,HHEX,LRRFIP2,PLPP3,PTPRO,SIAH2,TRPM4,WNT10A,WNT16,AXIN1,DAPK3,LDB1,LGR6,MAD2L2,NLE1
GO:BP	calcium ion homeostasis	GO:0055074	FALSE	4.26823E-05	4.36975	329	744	17	78724	ATP1B1,CALB1,CAV1,CCR2,CD19,CD40,CLIC2,CXCL10,CXCL9,HEXB,NTSR1,SLC8A3,SNCA,F2R,GRID2IP,PLCH2,TSPOAP1
GO:BP	head development	GO:0060322	FALSE	4.39337E-05	4.3572	806	744	27	78724	AIM2,CCDC39,DIAPH3,FCGR2B,GNB4,HESX1,INHBB,MAOB,NFIB,ODAD4,PAX5,SMAD1,SOX6,ZFAND5,AMIGO1,AXIN1,CBS,CDK5R1,DAB1,DDIT4,DLL1,FAT4,FEZ1,LDB1,NRCAM,SCN2A,SELENOP
GO:BP	type II interferon production	GO:0032609	FALSE	4.44309E-05	4.35232	121	744	11	78724	CCR2,CD274,CLEC7A,IL2,ISG15,JAK2,LGALS9,SLAMF1,TLR7,TXK,ZFPM1
GO:BP	regulation of cell-substrate adhesion	GO:0010810	FALSE	4.73423E-05	4.32475	217	744	14	78724	DUSP3,GBP1,GCNT2,JAK2,PTPRO,RIN2,S100A10,AJAP1,CCL28,DAPK3,FMN1,LDB1,PHLDB2,SKAP1
GO:BP	non-canonical NF-kappaB signal transduction	GO:0038061	FALSE	4.84195E-05	4.31498	122	744	11	78724	CD86,DDX3X,EIF2AK2,IFI35,LGALS9,SASH1,TLR7,TNFSF15,AKT1,CHI3L1,PTP4A3
GO:BP	regulation of alpha-beta T cell activation	GO:0046634	FALSE	4.84195E-05	4.31498	122	744	11	78724	CCR2,CD274,CD86,HLA-DRA,IL2,JAK2,LGALS9,NCKAP1L,ASCL2,SMAD7,TBX21
GO:BP	amide transport	GO:0042886	FALSE	4.87077E-05	4.3124	332	744	17	78724	ABCG2,EXOC3L1,FFAR2,FOLR2,FOLR3,GNAS,IL1RN,INHBB,JAK2,SLC14A1,SLC38A5,TRPM4,ACVR2B,PER2,SLC25A32,SMPD3,TACR2
GO:BP	B cell receptor signaling pathway	GO:0050853	FALSE	5.12567E-05	4.29025	72	744	9	78724	BANK1,BLNK,BTK,CD19,CD22,FCGR2B,MS4A1,NCKAP1L,NFATC2
GO:BP	visual system development	GO:0150063	FALSE	5.24808E-05	4.28	419	744	19	78724	BCAR3,C1QA,CALB1,CC2D2A,CRYBA1,DRAM2,HESX1,NFIB,TDRD7,WNT16,ACVR2B,BFSP1,DLL1,LAMC3,LIM2,NECTIN1,PER2,SPRED3,TUB
GO:BP	regulation of actin cytoskeleton organization	GO:0032956	FALSE	5.3147E-05	4.27452	334	744	17	78724	ARHGAP44,BST2,C9ORF72,KANK2,NCKAP1L,RICTOR,S100A10,SPTA1,SWAP70,TMOD2,CDK5R1,CYFIP2,DAPK3,FMN1,PHLDB2,RHOF,WASHC1
GO:BP	carbohydrate metabolic process	GO:0005975	FALSE	5.79753E-05	4.23676	561	744	22	78724	FGGY,GK,HEXB,IDH1,MGAM2,NTSR1,OAS1,PHKB,RUBCNL,SNCA,ZBTB20,AKT1,B4GALT4,CHI3L1,CHST13,DDIT4,DGKQ,GAL3ST4,OVGP1,PER2,PFKFB1,SMPD3
GO:BP	MDA-5 signaling pathway	GO:0039530	FALSE	5.8551E-05	4.23247	11	744	5	78724	DDX60,IFIH1,IRF7,OAS3,RIOK3
GO:BP	regulation of lymphocyte differentiation	GO:0045619	FALSE	5.95304E-05	4.22526	221	744	14	78724	BTK,CCR2,CD86,HLA-DRA,IL15,IL2,IL4I1,IL7,LGALS9,NCKAP1L,ASCL2,ERBB2,SMAD7,TBX21
GO:BP	positive regulation of secretion by cell	GO:1903532	FALSE	6.46615E-05	4.18935	298	744	16	78724	FFAR2,GOLPH3L,INHBB,JAK2,KMO,MAP2K6,NLGN1,NTSR1,S100A10,SNCA,TRPM4,EXPH5,NKX3-1,PTGES,SMPD3,TACR2
GO:BP	sensory system development	GO:0048880	FALSE	6.81005E-05	4.16685	426	744	19	78724	BCAR3,C1QA,CALB1,CC2D2A,CRYBA1,DRAM2,HESX1,NFIB,TDRD7,WNT16,ACVR2B,BFSP1,DLL1,LAMC3,LIM2,NECTIN1,PER2,SPRED3,TUB
GO:BP	regulation of T cell differentiation	GO:0045580	FALSE	6.98175E-05	4.15604	189	744	13	78724	CCR2,CD86,HLA-DRA,IL15,IL2,IL4I1,IL7,LGALS9,NCKAP1L,ASCL2,ERBB2,SMAD7,TBX21
GO:BP	negative regulation of extrinsic apoptotic signaling pathway	GO:2001237	FALSE	6.9941E-05	4.15527	99	744	10	78724	BCL2L1,DDX3X,HGF,IFI6,IL7,NRG1,PHIP,SIAH2,STRADB,AKT1
GO:BP	disruption of anatomical structure in another organism	GO:0141060	FALSE	6.9941E-05	4.15527	99	744	10	78724	C5,CLEC7A,GBP1,GBP3,LYZ,GNLY,GZMB,GZMM,NKG7,PRF1
GO:BP	striated muscle cell differentiation	GO:0051146	FALSE	7.4257E-05	4.12926	301	744	16	78724	BHLHE41,CASP7,CXCL10,CXCL9,NRG1,PDLIM5,RB1,SOX6,TMOD2,AKT1,DLL1,MYBPH,MYEF2,NFATC2,SCGB3A1,TRIM32
GO:BP	purine nucleotide metabolic process	GO:0006163	FALSE	7.88423E-05	4.10324	430	744	19	78724	ADCY6,ATP1B1,IDH1,KMO,LACC1,NDUFV3,NME4,NT5C2,ZBTB20,AK5,DDIT4,LRGUK,NDUFA13,NDUFB8,NME3,NUDT13,PDE9A,PFKFB1,SULT1E1
GO:BP	ossification	GO:0001503	FALSE	7.88423E-05	4.10324	430	744	19	78724	ADAR,DNAJC13,HGF,HSD17B4,ISG15,MAP2K6,SMAD1,TENT5A,TRPM4,TXLNG,ACVR2B,AKT1,CBS,COL13A1,DHRS3,FAT4,SMAD7,SMPD3,TP53INP2
GO:BP	lipid transport	GO:0006869	FALSE	9.78999E-05	4.00922	436	744	19	78724	ABCG2,APOL6,ATP10D,CAV1,DENND5B,MAP2K6,MSR1,NME4,NTSR1,OSBPL10,OSBPL1A,PLSCR1,PLSCR4,TSPO2,XKR9,AKT1,GDF9,NKX3-1,PTGES
GO:BP	toll-like receptor 7 signaling pathway	GO:0034154	FALSE	9.95889E-05	4.00179	12	744	5	78724	DDX3X,PIK3AP1,RSAD2,SCIMP,TLR7
GO:BP	phospholipid metabolic process	GO:0006644	FALSE	0.000100044	3.99981	392	744	18	78724	HEXB,IDH1,MTMR11,OSBPL10,PIGN,PIP5K1B,PLPP3,PLSCR1,SLC44A1,SMPDL3A,SNCA,SPTLC2,DGKK,DGKQ,PLCH2,PNPLA7,SMPD3,SYNJ2
GO:BP	T cell mediated cytotoxicity	GO:0001913	FALSE	0.000104267	3.98185	56	744	8	78724	CD1C,FCGR2B,HLA-DRA,NCKAP1L,CD1B,GZMM,KLRD1,PRF1
GO:BP	negative regulation of translation	GO:0017148	FALSE	0.000109667	3.95992	132	744	11	78724	ACO1,BANK1,DDX3X,EIF2AK1,EIF2AK2,MAP3K20,SAMD4A,XRN1,DAPK3,GZMB,PARP16
GO:BP	negative regulation of type I interferon-mediated signaling pathway	GO:0060339	FALSE	0.000109777	3.95949	23	744	6	78724	ADAR,ISG15,OAS1,OAS3,STAT2,USP18
GO:BP	developmental maturation	GO:0021700	FALSE	0.000113319	3.9457	352	744	17	78724	BCL11A,BTK,C1QA,CLEC7A,DIAPH3,FAM210B,IL15,RB1,TDRD1,TDRD7,TRIM58,BFSP1,CDK5R1,DAB1,FAT4,NRCAM,TMEM79
GO:BP	gliogenesis	GO:0042063	FALSE	0.000113319	3.9457	352	744	17	78724	C1QA,CCR2,HEXB,NFIB,PLPP3,RB1,SLC8A3,SOX6,AKT1,ASCL2,CDK5R1,DAB1,DLL1,ERBB2,LAMC3,METRN,NDN
GO:BP	antigen processing and presentation of exogenous peptide antigen	GO:0002478	FALSE	0.000114398	3.94158	38	744	7	78724	CTSE,CTSL,CTSV,FCGR2B,HLA-DMA,HLA-DMB,HLA-DRA
GO:BP	intracellular protein transport	GO:0006886	FALSE	0.000117913	3.92844	686	744	24	78724	ADAR,AP1S2,AP1S3,ARHGAP44,ARL4A,ATP1B1,HSPB1,IFI27,JAK2,NSF,RGPD2,SP100,STRADB,VPS45,AKAP5,AKT1,ARL4C,BAG3,EXPH5,MYO6,NDUFA13,PLK3,PRR5L,REEP2
GO:BP	calcium-mediated signaling	GO:0019722	FALSE	0.000121301	3.91614	234	744	14	78724	ATP1B1,BTK,C3AR1,CCR2,CCRL2,CD22,CLEC7A,CLIC2,GBP1,TRPM4,AKAP5,NFATC2,NMUR1,PTGDR2
GO:BP	regulation of transmembrane transport	GO:0034762	FALSE	0.000125436	3.90158	443	744	19	78724	ATP1B1,CAV1,CCR2,CD19,CLIC2,CXCL10,CXCL9,MS4A1,NLGN1,NTSR1,SESTD1,SNCA,AKAP5,AKT1,AMIGO1,F2R,PER2,RGS9,STAC
GO:BP	alpha-beta T cell differentiation	GO:0046632	FALSE	0.000128047	3.89263	134	744	11	78724	CD86,CTSL,HLA-DRA,IL2,LGALS9,NCKAP1L,RSAD2,ASCL2,SMAD7,TBX21,ZFPM1
GO:BP	reproductive structure development	GO:0048608	FALSE	0.00013272	3.87706	314	744	16	78724	BCL2L1,CSMD1,EAF2,HESX1,HSD17B4,IDH1,INHBB,NASP,PRLR,TNFSF10,YBX3,ZFX,AKR1C3,DHCR24,GDF9,NKX3-1
GO:BP	cell-substrate adhesion	GO:0031589	FALSE	0.000133216	3.87544	356	744	17	78724	BCAM,DUSP3,GBP1,GCNT2,JAK2,PTPRO,RIN2,S100A10,SIGLEC1,AJAP1,CCL28,COL13A1,DAPK3,FMN1,LDB1,PHLDB2,SKAP1
GO:BP	proteasomal protein catabolic process	GO:0010498	FALSE	0.000149398	3.82566	543	744	21	78724	CAV1,DCAF12,FAM8A1,IFI27,LAMP3,NUB1,PSME2,SIAH2,TRIM38,USP25,AKT1,AXIN1,DDA1,FBXL18,FBXW5,KLHDC3,MAPK9,SH3RF3,SIAH3,SMAD7,TBX21
GO:BP	leukocyte chemotaxis	GO:0030595	FALSE	0.00014958	3.82513	238	744	14	78724	C3AR1,C5,CCR2,CXCL10,CXCL9,FFAR2,LGALS9,LYST,NCKAP1L,PTPRO,SLAMF1,SWAP70,TRPM4,CCL3L3
GO:BP	response to alcohol	GO:0097305	FALSE	0.000153747	3.81319	277	744	15	78724	AANAT,ADCY6,BCL2L1,CYBB,FECH,GNAS,IL2,INHBB,MAOB,XRN1,AKR1C3,AKT1,CDO1,PTGDR,ZNF212
GO:BP	positive regulation of protein kinase activity	GO:0045860	FALSE	0.000157522	3.80266	239	744	14	78724	CD40,DDX3X,JAK2,NRG1,PRLR,SASH1,SNCA,STRADB,TNFSF15,AKT1,AXIN1,CCND3,CHI3L1,ERBB2
GO:BP	reproductive system development	GO:0061458	FALSE	0.000157751	3.80203	318	744	16	78724	BCL2L1,CSMD1,EAF2,HESX1,HSD17B4,IDH1,INHBB,NASP,PRLR,TNFSF10,YBX3,ZFX,AKR1C3,DHCR24,GDF9,NKX3-1
GO:BP	positive regulation of cytokine-mediated signaling pathway	GO:0001961	FALSE	0.00015876	3.79926	59	744	8	78724	CASP1,IL7,IRF7,PARP14,PARP9,ZBP1,TRIM32,TXK
GO:BP	sensory perception of pain	GO:0019233	FALSE	0.000162271	3.78976	82	744	9	78724	CCR2,NTSR1,PNOC,SCN9A,F2R,MRGPRX2,NDN,NR2F6,PTGES
GO:BP	T cell differentiation	GO:0030217	FALSE	0.000164645	3.78345	319	744	16	78724	CCR2,CD86,CTSL,HLA-DRA,IL15,IL2,IL4I1,IL7,LGALS9,NCKAP1L,RSAD2,ASCL2,ERBB2,SMAD7,TBX21,ZFPM1
GO:BP	positive regulation of protein localization	GO:1903829	FALSE	0.00017093	3.76718	499	744	20	78724	DTX3L,FFAR2,GOLPH3L,JAK2,PARP9,SNCA,TRPM4,AKAP5,AKT1,BAG3,CD247,CDK5R1,ERBB2,EXPH5,GZMB,HSPA1L,PLK3,PRR5L,PTP4A3,STAC
GO:BP	regulation of monoatomic ion transport	GO:0043269	FALSE	0.000171267	3.76633	452	744	19	78724	ATP1B1,CAV1,CCR2,CD19,CLIC2,CXCL10,CXCL9,MAOB,MS4A1,NTSR1,SESTD1,SNCA,AKAP5,AKT1,AMIGO1,F2R,RGS9,STAC,TACR2
GO:BP	adaptive thermogenesis	GO:1990845	FALSE	0.000174565	3.75804	170	744	12	78724	ALDH1A1,CAV1,CCR2,GNAS,IL15,JAK2,MAP2K6,PRLR,RB1,ACVR2B,PER2,S100B
GO:BP	regulation of monoatomic ion transmembrane transport	GO:0034765	FALSE	0.000179263	3.74651	321	744	16	78724	ATP1B1,CAV1,CCR2,CD19,CLIC2,CXCL10,CXCL9,MS4A1,NTSR1,SESTD1,SNCA,AKAP5,AMIGO1,F2R,RGS9,STAC
GO:BP	positive regulation of cytokine production involved in immune response	GO:0002720	FALSE	0.000180486	3.74356	83	744	9	78724	CLEC7A,FFAR2,LACC1,RSAD2,SCIMP,SLAMF1,TLR7,SPON2,TBX21
GO:BP	immunoglobulin production involved in immunoglobulin-mediated immune response	GO:0002381	FALSE	0.00018167	3.74072	60	744	8	78724	AICDA,BTK,CD40,IL2,SANBR,SWAP70,MAD2L2,TBX21
GO:BP	interleukin-10 production	GO:0032613	FALSE	0.00018167	3.74072	60	744	8	78724	BTK,CD274,CLEC7A,FCGR2B,HGF,ISG15,LGALS9,DLL1
GO:BP	positive regulation of interleukin-1 beta production	GO:0032731	FALSE	0.00018167	3.74072	60	744	8	78724	AIM2,CASP1,CLEC7A,HSPB1,IFI16,JAK2,LGALS9,NAIP
GO:BP	regulation of interleukin-10 production	GO:0032653	FALSE	0.00018167	3.74072	60	744	8	78724	BTK,CD274,CLEC7A,FCGR2B,HGF,ISG15,LGALS9,DLL1
GO:BP	tyrosine phosphorylation of STAT protein	GO:0007260	FALSE	0.00018167	3.74072	60	744	8	78724	CAV1,CD40,IL15,IL2,IL31RA,JAK2,PARP14,PARP9
GO:BP	positive regulation of secretion	GO:0051047	FALSE	0.000187006	3.72814	322	744	16	78724	FFAR2,GOLPH3L,INHBB,JAK2,KMO,MAP2K6,NLGN1,NTSR1,S100A10,SNCA,TRPM4,EXPH5,NKX3-1,PTGES,SMPD3,TACR2
GO:BP	amide metabolic process	GO:0043603	FALSE	0.000189668	3.72201	455	744	19	78724	AANAT,ACOT9,CTSL,HEXB,HSD17B4,IDH1,NT5C2,OPLAH,PLPP3,SMPDL3A,SNCA,SPTLC2,UGT8,ACOT2,B4GALT4,CARNS1,FPGS,SLC25A32,SMPD3
GO:BP	protein localization to cell periphery	GO:1990778	FALSE	0.000190149	3.72091	365	744	17	78724	ARHGAP44,ATP1B1,BCL2L1,CAV1,EPB41L3,GBP1,GOLPH3L,GPC4,NSF,S100A10,SNCA,AKAP5,AKT1,ERBB2,SKAP1,STAC,TUB
GO:BP	development of primary sexual characteristics	GO:0045137	FALSE	0.000193239	3.71391	243	744	14	78724	BCL2L1,CSMD1,HESX1,HSD17B4,IDH1,INHBB,LHFPL2,NASP,TNFSF10,YBX3,ZFX,AKR1C3,GDF9,NKX3-1
GO:BP	lipid localization	GO:0010876	FALSE	0.000196194	3.70731	456	744	19	78724	ABCG2,APOL6,ATP10D,CAV1,DENND5B,MAP2K6,MSR1,NME4,NTSR1,OSBPL10,OSBPL1A,PLSCR1,PLSCR4,TSPO2,XKR9,AKT1,GDF9,NKX3-1,PTGES
GO:BP	regulation of CD4-positive, alpha-beta T cell activation	GO:2000514	FALSE	0.000200456	3.69798	84	744	9	78724	CD274,CD86,HLA-DRA,IL2,LGALS9,NCKAP1L,ASCL2,SMAD7,TBX21
GO:BP	regulation of system process	GO:0044057	FALSE	0.000202234	3.69415	553	744	21	78724	ATP1B1,CAV1,CLIC2,DOCK4,GCH1,INHBB,NLGN1,NTSR1,PTPRO,SLC8A3,SMTNL1,TRPM4,DAPK3,F2R,GDF9,MYBPH,NKX3-1,PDE9A,PER2,SMAD7,TACR2
GO:BP	regulation of calcium ion transport	GO:0051924	FALSE	0.000203239	3.69199	244	744	14	78724	ATP1B1,CAV1,CD19,CLIC2,CXCL10,CXCL9,MS4A1,NTSR1,SESTD1,SNCA,AKAP5,F2R,RGS9,STAC
GO:BP	regulation of monoatomic cation transmembrane transport	GO:1904062	FALSE	0.000212455	3.67273	284	744	15	78724	ATP1B1,CAV1,CD19,CLIC2,CXCL10,CXCL9,MS4A1,NTSR1,SESTD1,SNCA,AKAP5,AMIGO1,F2R,RGS9,STAC
GO:BP	protein polymerization	GO:0051258	FALSE	0.000212455	3.67273	284	744	15	78724	DIAPH3,JAK2,KANK2,MAP2,NAV3,NCKAP1L,RICTOR,SNCA,SPTA1,TMOD2,TPPP3,CDK5R1,CYFIP2,FMN1,TRIM32
GO:BP	heart development	GO:0007507	FALSE	0.000214005	3.66958	605	744	22	78724	CALCRL,CASP7,CC2D2A,CCDC39,KDM6A,MIB1,NRG1,ODAD4,PDLIM5,RB1,SEMA3C,SMAD1,SOX6,WNT16,ACVR2B,DHRS3,DLL1,ERBB2,FAT4,NKX3-1,SMAD7,ZFPM1
GO:BP	leukocyte degranulation	GO:0043299	FALSE	0.000222321	3.65302	85	744	9	78724	BTK,CCR2,FCGR2B,LGALS9,MILR1,NCKAP1L,MRGPRX2,NKG7,PTGDR
GO:BP	cell division	GO:0051301	FALSE	0.000223968	3.64981	658	744	23	78724	BCL2L1,CCNA1,CDK14,CHEK2,E2F8,EVI5,MACC1,MIS18BP1,PKN2,RB1,RBBP8,CCNB3,CCND3,DLL1,LBH,LLGL2,MAD2L2,MRGPRX2,NKX3-1,PARD6B,PDGFD,PLK3,TMEM250
GO:BP	eye development	GO:0001654	FALSE	0.00023361	3.63151	415	744	18	78724	BCAR3,CALB1,CC2D2A,CRYBA1,DRAM2,HESX1,NFIB,TDRD7,WNT16,ACVR2B,BFSP1,DLL1,LAMC3,LIM2,NECTIN1,PER2,SPRED3,TUB
GO:BP	regulation of CD4-positive, alpha-beta T cell differentiation	GO:0043370	FALSE	0.000236115	3.62688	62	744	8	78724	CD86,HLA-DRA,IL2,LGALS9,NCKAP1L,ASCL2,SMAD7,TBX21
GO:BP	leukocyte homeostasis	GO:0001776	FALSE	0.000247601	3.60625	113	744	10	78724	AIM2,BTK,CCR2,IL2,LGALS9,NCKAP1L,SPTA1,TNFSF13B,AKT1,F2R
GO:BP	modulation of chemical synaptic transmission	GO:0050804	FALSE	0.000265835	3.57539	513	744	20	78724	ARHGAP44,CACNA1A,CALB1,CCR2,DNM1,JAK2,KMO,NLGN1,SLC1A3,SLC8A3,SNCA,AKAP5,APBA2,F2R,GRID2IP,MAPK9,PDE9A,S100B,TACR2,TSPOAP1
GO:BP	regulation of trans-synaptic signaling	GO:0099177	FALSE	0.000274189	3.56195	514	744	20	78724	ARHGAP44,CACNA1A,CALB1,CCR2,DNM1,JAK2,KMO,NLGN1,SLC1A3,SLC8A3,SNCA,AKAP5,APBA2,F2R,GRID2IP,MAPK9,PDE9A,S100B,TACR2,TSPOAP1
GO:BP	chromatin organization	GO:0006325	FALSE	0.000278456	3.55524	884	744	27	78724	AICDA,APOBEC3A,BAHCC1,BAZ2B,CHD1,DTX3L,H4C1,IFI16,JAK2,KDM6A,NASP,RB1,SETSIP,SMC6,SMCHD1,TDRD1,APOBEC3H,AXIN1,BAHD1,DAPK3,EEF2KMT,NAA60,NAP1L5,NDN,PER2,PHF1,PRMT2
GO:BP	defense response to bacterium	GO:0042742	FALSE	0.000282951	3.54829	332	744	16	78724	AICDA,CASP1,CASP7,GBP1,GBP3,IFNE,ISG15,LYST,LYZ,NAIP,OAS1,OAS2,OAS3,SLC9A9,GNLY,SPON2
GO:BP	monocarboxylic acid metabolic process	GO:0032787	FALSE	0.000290892	3.53627	616	744	22	78724	ALDH1A1,CAV1,DHRS9,GLYATL2,HSD17B4,IDH1,IL4I1,KMO,OSBPL1A,SLC1A3,SNCA,ZBTB20,ACADVL,ACOT2,ADTRP,AKR1C3,AKT1,DDIT4,MGAT4A,PER2,PFKFB1,PTGES
GO:BP	connective tissue development	GO:0061448	FALSE	0.00030389	3.51728	292	744	15	78724	NFIB,RASAL2,RB1,SMAD1,SOX6,SPTLC2,TRPM4,TRPS1,CBS,CHI3L1,MEX3C,NFATC2,PDGFD,SMAD7,SMPD3
GO:BP	positive regulation of non-canonical NF-kappaB signal transduction	GO:1901224	FALSE	0.000304006	3.51712	64	744	8	78724	CD86,DDX3X,EIF2AK2,IFI35,LGALS9,SASH1,TLR7,PTP4A3
GO:BP	type II interferon-mediated signaling pathway	GO:0060333	FALSE	0.00031171	3.50625	27	744	6	78724	JAK2,PARP14,PARP9,SP100,STAT1,TXK
GO:BP	cellular response to interferon-beta	GO:0035458	FALSE	0.00031171	3.50625	27	744	6	78724	AIM2,IFI16,OAS1,PNPT1,STAT1,NDUFA13
GO:BP	organophosphate biosynthetic process	GO:0090407	FALSE	0.000315892	3.50046	619	744	22	78724	ADCY6,CMPK2,GK,HEXB,IDH1,KMO,NDUFV3,NME4,NTSR1,PIGN,PIP5K1B,PLSCR1,SLC44A1,SNCA,SPTLC2,AK5,DGKK,DGKQ,NDUFA13,NDUFB8,NME3,SYNJ2
GO:BP	positive regulation of calcium ion transport	GO:0051928	FALSE	0.000317152	3.49873	116	744	10	78724	CAV1,CD19,CXCL10,CXCL9,MS4A1,NTSR1,SNCA,AKAP5,F2R,STAC
GO:BP	chromatin remodeling	GO:0006338	FALSE	0.000322639	3.49128	725	744	24	78724	AICDA,APOBEC3A,BAZ2B,CHD1,DTX3L,H4C1,IFI16,JAK2,KDM6A,NASP,RB1,SETSIP,SMCHD1,TDRD1,APOBEC3H,AXIN1,BAHD1,EEF2KMT,NAA60,NAP1L5,NDN,PER2,PHF1,PRMT2
GO:BP	negative regulation of production of molecular mediator of immune response	GO:0002701	FALSE	0.0003307	3.48057	44	744	7	78724	BST2,CD22,FCGR2B,IRAK3,SLAMF1,SMAD7,TBX21
GO:BP	sex differentiation	GO:0007548	FALSE	0.000331715	3.47924	294	744	15	78724	BCL2L1,CSMD1,HESX1,HSD17B4,IDH1,INHBB,LHFPL2,NASP,TNFSF10,YBX3,ZFX,AKR1C3,DHCR24,GDF9,NKX3-1
GO:BP	positive regulation of kinase activity	GO:0033674	FALSE	0.000332176	3.47863	254	744	14	78724	CD40,DDX3X,JAK2,NRG1,PRLR,SASH1,SNCA,STRADB,TNFSF15,AKT1,AXIN1,CCND3,CHI3L1,ERBB2
GO:BP	translation	GO:0006412	FALSE	0.000339053	3.46973	727	744	24	78724	ACO1,BANK1,DDX3X,EIF2AK1,EIF2AK2,EIF2S3,EIF2S3B,FECH,HSPB1,MAP3K20,MRPL12,NSUN3,SAMD4A,WARS1,XRN1,YBX3,AKT1,DAPK3,EEF2K,ERBB2,GZMB,MRPL4,PARP16,SARNP
GO:BP	response to purine-containing compound	GO:0014074	FALSE	0.000353252	3.45192	148	744	11	78724	AANAT,INHBB,PNPT1,STAT1,TLR7,TRPM4,XRN1,CDO1,DGKQ,EEF2K,PFKFB1
GO:BP	regulation of cell cycle phase transition	GO:1901987	FALSE	0.000355249	3.44947	427	744	18	78724	CHEK2,DDX3X,DTX3L,HORMAD1,KANK2,MAP3K20,PARP9,PSME2,RB1,RBBP8,AKT1,CCND3,CCNQ,MAD2L2,MUS81,PLK3,PRMT2,RASSF1
GO:BP	positive regulation of transferase activity	GO:0051347	FALSE	0.000361825	3.4415	296	744	15	78724	CD40,DDX3X,JAK2,NRG1,PRLR,SASH1,SNCA,STRADB,TNFSF15,AKT1,ARRDC4,AXIN1,CCND3,CHI3L1,ERBB2
GO:BP	leukocyte apoptotic process	GO:0071887	FALSE	0.000372549	3.42882	118	744	10	78724	BCL2L1,BTK,CASP7,CD274,CHEK2,CTSL,IL2,IRF7,LGALS9,AKT1
GO:BP	gamete generation	GO:0007276	FALSE	0.000374182	3.42692	841	744	26	78724	ADAM28,BCL2L1,CCNA1,CFAP54,DDX3X,FANCL,HEXB,HORMAD1,INHBB,PAX5,RB1,SLC26A8,SMAD1,SMCHD1,STRBP,TDRD1,TDRD7,TTC21A,YBX3,ZFX,AKT1,GDF9,LRGUK,NDN,PTGDR2,TSGA10
GO:BP	amino acid metabolic process	GO:0006520	FALSE	0.000377787	3.42275	297	744	15	78724	ALDH1A1,DDAH1,HNMT,IL4I1,KMO,SDSL,SLC1A3,SLC45A2,SLC7A7,WARS1,CARNS1,CBS,CDO1,FPGS,RIMKLA
GO:BP	pattern specification process	GO:0007389	FALSE	0.000390786	3.40806	477	744	19	78724	BHLHE41,C1QA,CC2D2A,CCDC39,HHEX,KDM6A,MIB1,ODAD4,SEMA3C,SMAD1,TDRD1,TDRD7,ACVR2B,AXIN1,DLL1,LDB1,MFNG,NKX3-1,NLE1
GO:BP	innate immune response activating cell surface receptor signaling pathway	GO:0002220	FALSE	0.000402438	3.3953	91	744	9	78724	CLEC7A,FFAR2,IFI35,OAS1,PIK3AP1,SCIMP,WDFY1,KLRD1,TRIM32
GO:BP	L-amino acid transport	GO:0015807	FALSE	0.000402438	3.3953	91	744	9	78724	KMO,NTSR1,SLC1A3,SLC38A5,SLC38A9,SLC7A7,LLGL2,PER2,SLC25A29
GO:BP	ERK1 and ERK2 cascade	GO:0070371	FALSE	0.000411637	3.38549	299	744	15	78724	CRYBA1,DUSP3,GBP1,GCNT2,HESX1,LGALS9,MARCO,NRG1,SCIMP,SLAMF1,CHI3L1,ERBB2,F2R,PDGFD,SPRED3
GO:BP	regulation of cold-induced thermogenesis	GO:0120161	FALSE	0.000432744	3.36377	151	744	11	78724	ALDH1A1,CAV1,CCR2,GNAS,IL15,JAK2,MAP2K6,PRLR,RB1,ACVR2B,PER2
GO:BP	regulation of defense response to virus by host	GO:0050691	FALSE	0.000454406	3.34256	46	744	7	78724	AIM2,DTX3L,IL15,NT5C2,PARP9,STAT1,TRIM22
GO:BP	interleukin-1 beta production	GO:0032611	FALSE	0.000485657	3.31367	93	744	9	78724	AIM2,CASP1,CLEC7A,HSPB1,IFI16,JAK2,LGALS9,NAIP,F2R
GO:BP	regulation of interleukin-1 beta production	GO:0032651	FALSE	0.000485657	3.31367	93	744	9	78724	AIM2,CASP1,CLEC7A,HSPB1,IFI16,JAK2,LGALS9,NAIP,F2R
GO:BP	cold-induced thermogenesis	GO:0106106	FALSE	0.000494161	3.30613	153	744	11	78724	ALDH1A1,CAV1,CCR2,GNAS,IL15,JAK2,MAP2K6,PRLR,RB1,ACVR2B,PER2
GO:BP	regulation of cell-matrix adhesion	GO:0001952	FALSE	0.000509346	3.29299	122	744	10	78724	DUSP3,RIN2,S100A10,AJAP1,CCL28,DAPK3,FMN1,LDB1,PHLDB2,SKAP1
GO:BP	receptor-mediated endocytosis	GO:0006898	FALSE	0.000530642	3.2752	264	744	14	78724	CALCRL,CAV1,CTSL,DNAJC13,DNM1,FCGR2B,MARCO,MRC1,MSR1,NRG1,SGIP1,SIGLEC1,SNCA,DLL1
GO:BP	response to xenobiotic stimulus	GO:0009410	FALSE	0.000532298	3.27384	439	744	18	78724	AIM2,BCAR3,CYBB,FECH,MAOB,MAP2K6,NCKAP1L,RB1,SEMA3C,SLC1A3,SMTNL1,SNCA,STAT1,COL18A1,MYO6,NFATC2,NKX3-1,NPAS2
GO:BP	developmental cell growth	GO:0048588	FALSE	0.000556939	3.25419	226	744	13	78724	BCL11A,C9ORF72,KIAA0319,MAP2,PDLIM5,CYFIP2,GDF9,MEX3C,NDN,NRCAM,PRMT2,S100B,SMAD7
GO:BP	regulation of intracellular transport	GO:0032386	FALSE	0.000581253	3.23563	266	744	14	78724	ARHGAP44,DNAJC13,IFI27,JAK2,MAP2,MX2,SP100,TRIM58,AKAP5,BAG3,FEZ1,PLK3,PRR5L,REEP2
GO:BP	regulation of plasma membrane bounded cell projection organization	GO:0120035	FALSE	0.000584134	3.23349	642	744	22	78724	ADCY6,ARHGAP24,ARHGAP44,BCL11A,CAV1,FCGR2B,KIAA0319,MAP2,NLGN1,PDLIM5,PTPRF,PTPRO,AKT1,AMIGO1,CDK5R1,DAB1,EEF2K,FEZ1,METRN,NRCAM,TRIM32,WASHC1
GO:BP	mononuclear cell migration	GO:0071674	FALSE	0.000585719	3.23231	227	744	13	78724	C3AR1,C5,CCR2,CXCL10,LGALS9,PTPRO,SLAMF1,TRPM4,ADTRP,AKT1,ASCL2,PDGFD,TBX21
GO:BP	regulation of protein transport	GO:0051223	FALSE	0.000587624	3.2309	442	744	18	78724	ARHGAP44,FFAR2,GNAS,GOLPH3L,IFI27,INHBB,JAK2,RSAD2,SP100,TRPM4,ADTRP,AKAP5,BAG3,EXPH5,F2R,PER2,PLK3,PRR5L
GO:BP	regulation of biological process involved in symbiotic interaction	GO:0043903	FALSE	0.000614935	3.21117	48	744	7	78724	BST2,CAV1,LGALS9,TRIM22,TRIM38,TRIM5,TRIM58
GO:BP	extrinsic apoptotic signaling pathway in absence of ligand	GO:0097192	FALSE	0.000616908	3.20978	70	744	8	78724	BCL2L1,IFI6,IL2,IL7,NRG1,STRADB,AKT1,BAG3
GO:BP	brain development	GO:0007420	FALSE	0.000650759	3.18658	754	744	24	78724	AIM2,CCDC39,FCGR2B,GNB4,HESX1,INHBB,MAOB,NFIB,ODAD4,PAX5,SMAD1,SOX6,AMIGO1,CBS,CDK5R1,DAB1,DDIT4,DLL1,FAT4,FEZ1,LDB1,NRCAM,SCN2A,SELENOP
GO:BP	cellular response to metal ion	GO:0071248	FALSE	0.000652562	3.18538	192	744	12	78724	CPNE8,CYBB,HESX1,INHBB,NLGN1,SNCA,AKR1C3,AKT1,EEF2K,MAPK9,NFATC2,SMPD3
GO:BP	canonical Wnt signaling pathway	GO:0060070	FALSE	0.000678967	3.16815	311	744	15	78724	CAV1,CDK14,DDX3X,HESX1,HHEX,PTPRO,SIAH2,TRPM4,WNT10A,WNT16,AXIN1,DAPK3,LGR6,MAD2L2,NLE1
GO:BP	positive regulation of interleukin-1 production	GO:0032732	FALSE	0.000689502	3.16146	71	744	8	78724	AIM2,CASP1,CLEC7A,HSPB1,IFI16,JAK2,LGALS9,NAIP
GO:BP	positive regulation of pattern recognition receptor signaling pathway	GO:0062208	FALSE	0.000689502	3.16146	71	744	8	78724	BTK,CAV1,DDX3X,DDX60,IFI35,OASL,RSAD2,WDFY1
GO:BP	regulation of peptidyl-serine phosphorylation	GO:0033135	FALSE	0.000697821	3.15626	97	744	9	78724	BCAR3,CAV1,HGF,RICTOR,SNCA,AKT1,AXIN1,MAD2L2,SMAD7
GO:BP	positive regulation of interleukin-6 production	GO:0032755	FALSE	0.000761975	3.11806	98	744	9	78724	BTK,CLEC7A,IFIH1,LGALS9,SCIMP,TLR7,ZBTB20,F2R,SPON2
GO:BP	signal transduction in absence of ligand	GO:0038034	FALSE	0.000769283	3.11391	72	744	8	78724	BCL2L1,IFI6,IL2,IL7,NRG1,STRADB,AKT1,BAG3
GO:BP	sensory perception of mechanical stimulus	GO:0050954	FALSE	0.000813578	3.0896	196	744	12	78724	CCDC50,COL4A3,DIAPH3,HEXB,PKHD1L1,SCN9A,SLC1A3,SOBP,ZNF354A,AXIN1,MYO6,TUB
GO:BP	regulation of neuron differentiation	GO:0045664	FALSE	0.000813578	3.0896	196	744	12	78724	BCL11A,BEND6,MIB1,NLGN1,TCF4,CDK5R1,DAB1,DLL1,NRCAM,S100B,S1PR5,TRIM32
GO:BP	muscle cell differentiation	GO:0042692	FALSE	0.000817031	3.08776	405	744	17	78724	BHLHE41,CASP7,CXCL10,CXCL9,NRG1,PDLIM5,RB1,SMAD1,SOX6,TMOD2,AKT1,DLL1,MYBPH,MYEF2,NFATC2,SCGB3A1,TRIM32
GO:BP	regulation of ERK1 and ERK2 cascade	GO:0070372	FALSE	0.000829977	3.08093	274	744	14	78724	CRYBA1,DUSP3,GBP1,GCNT2,LGALS9,MARCO,NRG1,SCIMP,SLAMF1,CHI3L1,ERBB2,F2R,PDGFD,SPRED3
GO:BP	negative regulation of catabolic process	GO:0009895	FALSE	0.0008657	3.06263	361	744	16	78724	BCL2L1,HGF,IRAK3,LAMP3,SNCA,TENT5A,TENT5C,USP25,YBX3,AKT1,DDIT4,FEZ1,MAD2L2,PDE3B,PFKFB1,WASHC1
GO:BP	regulation of cell projection organization	GO:0031344	FALSE	0.000880471	3.05528	658	744	22	78724	ADCY6,ARHGAP24,ARHGAP44,BCL11A,CAV1,FCGR2B,KIAA0319,MAP2,NLGN1,PDLIM5,PTPRF,PTPRO,AKT1,AMIGO1,CDK5R1,DAB1,EEF2K,FEZ1,METRN,NRCAM,TRIM32,WASHC1
GO:BP	cell-matrix adhesion	GO:0007160	FALSE	0.000955689	3.01968	237	744	13	78724	BCAM,DUSP3,RIN2,S100A10,SIGLEC1,AJAP1,CCL28,COL13A1,DAPK3,FMN1,LDB1,PHLDB2,SKAP1
GO:BP	regulation of protein polymerization	GO:0032271	FALSE	0.000956577	3.01928	199	744	12	78724	KANK2,MAP2,NAV3,NCKAP1L,RICTOR,SNCA,SPTA1,TMOD2,TPPP3,CDK5R1,CYFIP2,FMN1
GO:BP	carboxylic acid biosynthetic process	GO:0046394	FALSE	0.000973079	3.01185	320	744	15	78724	ALDH1A1,CASP1,DHRS9,KMO,NAIP,OSBPL1A,SDSL,SLC1A3,ACADVL,AKR1C3,CARNS1,CBS,CDO1,PER2,PTGES
GO:BP	negative regulation of T cell activation	GO:0050868	FALSE	0.000987857	3.00531	131	744	10	78724	CD274,DUSP3,IL2,IL4I1,LGALS9,PAWR,ASCL2,ERBB2,SMAD7,TBX21
GO:BP	amino acid transport	GO:0006865	FALSE	0.000990548	3.00412	164	744	11	78724	KMO,NTSR1,SLC1A3,SLC38A5,SLC38A9,SLC7A7,SNCA,TSPO2,LLGL2,PER2,SLC25A29
GO:BP	organ growth	GO:0035265	FALSE	0.000990548	3.00412	164	744	11	78724	IL7,NRG1,PDLIM5,PRLR,SMAD1,YBX3,ACVR2B,AKT1,BNC2,DLL1,SMPD3
GO:BP	gonad development	GO:0008406	FALSE	0.00100226	2.99902	238	744	13	78724	BCL2L1,CSMD1,HESX1,HSD17B4,IDH1,INHBB,NASP,TNFSF10,YBX3,ZFX,AKR1C3,GDF9,NKX3-1
GO:BP	regulation of muscle contraction	GO:0006937	FALSE	0.00105232	2.97785	165	744	11	78724	ATP1B1,CAV1,CLIC2,DOCK4,SLC8A3,TRPM4,DAPK3,F2R,MYBPH,SMAD7,TACR2
GO:BP	response to organophosphorus	GO:0046683	FALSE	0.00105984	2.97476	132	744	10	78724	AANAT,INHBB,PNPT1,STAT1,TLR7,TRPM4,CDO1,DGKQ,EEF2K,PFKFB1
GO:BP	cell projection assembly	GO:0030031	FALSE	0.00108079	2.96626	613	744	21	78724	ARHGAP24,ARHGAP44,CAV1,CC2D2A,CCDC39,CEP162,CFAP54,DNAH8,EMP1,FGD4,NCKAP1L,NLGN1,ODAD4,PTPRO,AKT1,CYFIP2,DYNC2I1,LRGUK,TMEM250,TRIM32,WASHC1
GO:BP	organic acid biosynthetic process	GO:0016053	FALSE	0.00109405	2.96096	323	744	15	78724	ALDH1A1,CASP1,DHRS9,KMO,NAIP,OSBPL1A,SDSL,SLC1A3,ACADVL,AKR1C3,CARNS1,CBS,CDO1,PER2,PTGES
GO:BP	proteasome-mediated ubiquitin-dependent protein catabolic process	GO:0043161	FALSE	0.00110611	2.9562	414	744	17	78724	DCAF12,IFI27,NUB1,SIAH2,TRIM38,USP25,AKT1,AXIN1,DDA1,FBXL18,FBXW5,KLHDC3,MAPK9,SH3RF3,SIAH3,SMAD7,TBX21
GO:BP	hormone secretion	GO:0046879	FALSE	0.00113728	2.94413	324	744	15	78724	BTK,EXOC3L1,FFAR2,GNAS,IL1RN,INHBB,JAK2,TRPM4,ACVR2B,GDF9,GNRHR,NKX3-1,PER2,SMPD3,TACR2
GO:BP	L-amino acid catabolic process	GO:0170035	FALSE	0.00117238	2.93093	76	744	8	78724	DDAH1,HNMT,IL4I1,KMO,SDSL,CARNS1,CBS,CDO1
GO:BP	TOR signaling	GO:0031929	FALSE	0.00118613	2.92587	167	744	11	78724	C9ORF72,CRYBA1,NCKAP1L,RICTOR,SLC38A9,AKT1,DDIT4,DGKQ,PRR5,PRR5L,RHEBL1
GO:BP	regulation of protein serine/threonine kinase activity	GO:0071900	FALSE	0.0012095	2.91739	242	744	13	78724	CD40,DDX3X,HERC5,HHEX,IRAK3,RB1,SASH1,SLC8A3,SNCA,AKT1,CCND3,CDK5R1,ERBB2
GO:BP	glycoprotein metabolic process	GO:0009100	FALSE	0.00124048	2.90641	371	744	16	78724	BTK,C1GALT1,CTSL,DSE,GALNT5,GALNTL6,GCNT1,GCNT2,HEXB,IL15,PAWR,B4GALT4,CHST13,GAL3ST4,GALNT12,MGAT4A
GO:BP	extracellular matrix organization	GO:0030198	FALSE	0.00127637	2.89402	327	744	15	78724	CAV1,COL19A1,COL4A3,CTSV,FAP,MMP17,RB1,ADTRP,COL13A1,COL18A1,IMPG1,MAD2L2,PHLDB2,SMPD3,WASHC1
GO:BP	embryonic morphogenesis	GO:0048598	FALSE	0.00129544	2.88758	620	744	21	78724	CC2D2A,CCDC39,HESX1,IL1RN,KDM6A,MAP3K20,MIB1,PAX5,PLPP3,SMAD1,SOBP,WNT16,ACVR2B,AXIN1,DLL1,DUSP2,DYNC2I1,LDB1,MYO6,PHLDB2,ST14
GO:BP	regulation of immunoglobulin production	GO:0002637	FALSE	0.00129751	2.88689	77	744	8	78724	BTK,CD22,CD40,CD86,FCGR2B,IL2,MAD2L2,TBX21
GO:BP	extracellular structure organization	GO:0043062	FALSE	0.00132603	2.87745	328	744	15	78724	CAV1,COL19A1,COL4A3,CTSV,FAP,MMP17,RB1,ADTRP,COL13A1,COL18A1,IMPG1,MAD2L2,PHLDB2,SMPD3,WASHC1
GO:BP	hormone metabolic process	GO:0042445	FALSE	0.0013268	2.87719	244	744	13	78724	AANAT,ALDH1A1,CTSL,DHRS9,HSD17B4,HSD17B6,IL4I1,PNPLA4,AKR1C3,DGKQ,DHRS11,DHRS3,SULT1E1
GO:BP	sensory perception of sound	GO:0007605	FALSE	0.00133471	2.87461	169	744	11	78724	CCDC50,COL4A3,DIAPH3,HEXB,PKHD1L1,SLC1A3,SOBP,ZNF354A,AXIN1,MYO6,TUB
GO:BP	external encapsulating structure organization	GO:0045229	FALSE	0.00137742	2.86093	329	744	15	78724	CAV1,COL19A1,COL4A3,CTSV,FAP,MMP17,RB1,ADTRP,COL13A1,COL18A1,IMPG1,MAD2L2,PHLDB2,SMPD3,WASHC1
GO:BP	regulation of metal ion transport	GO:0010959	FALSE	0.00137854	2.86058	374	744	16	78724	ATP1B1,CAV1,CD19,CLIC2,CXCL10,CXCL9,MS4A1,NTSR1,SESTD1,SNCA,AKAP5,AKT1,AMIGO1,F2R,RGS9,STAC
GO:BP	regulation of response to wounding	GO:1903034	FALSE	0.00141497	2.84925	170	744	11	78724	CAV1,CLEC7A,FAP,KIAA0319,PTPRF,SERPINB2,SERPING1,ADTRP,AJAP1,F2R,PHLDB2
GO:BP	organic acid catabolic process	GO:0016054	FALSE	0.00145415	2.83739	246	744	13	78724	DDAH1,GLYATL2,HNMT,HSD17B4,IL4I1,KMO,SDSL,ACADVL,ADTRP,AKT1,CARNS1,CBS,CDO1
GO:BP	carboxylic acid catabolic process	GO:0046395	FALSE	0.00145415	2.83739	246	744	13	78724	DDAH1,GLYATL2,HNMT,HSD17B4,IL4I1,KMO,SDSL,ACADVL,ADTRP,AKT1,CARNS1,CBS,CDO1
GO:BP	organophosphate catabolic process	GO:0046434	FALSE	0.00145415	2.83739	246	744	13	78724	ENTPD2,IDH1,MBD4,NT5C2,NTSR1,SMPDL3A,ZBTB20,DDIT4,NUDT13,PDE9A,PFKFB1,PNPLA7,SMPD3
GO:BP	dicarboxylic acid transport	GO:0006835	FALSE	0.001487	2.82769	106	744	9	78724	FOLR2,FOLR3,KMO,NTSR1,SLC1A3,SLC26A8,SNCA,PER2,SLC25A32
GO:BP	cellular response to oxidative stress	GO:0034599	FALSE	0.00152181	2.81764	247	744	13	78724	BTK,GCH1,HGF,PAWR,PNPT1,SNCA,VRK2,WNT16,AKT1,MAPK9,PDGFD,PRR5L,SMPD3
GO:BP	maintenance of location in cell	GO:0051651	FALSE	0.00152869	2.81568	208	744	12	78724	CAV1,CD19,CLIC2,CXCL10,CXCL9,HEXB,NTSR1,SNCA,SP100,AKT1,F2R,PLCH2
GO:BP	negative regulation of cell cycle	GO:0045786	FALSE	0.00153032	2.81522	377	744	16	78724	CHEK2,DTX3L,E2F8,HHEX,HORMAD1,KANK2,MAP3K20,PARP9,RB1,RBBP8,MAD2L2,MUS81,NLE1,PLK3,PRMT2,TOM1L2
GO:BP	negative regulation of cell cycle process	GO:0010948	FALSE	0.00156577	2.80527	289	744	14	78724	CHEK2,DTX3L,E2F8,HORMAD1,KANK2,MAP3K20,PARP9,RB1,RBBP8,MAD2L2,MUS81,PLK3,PRMT2,TOM1L2
GO:BP	proteinogenic amino acid catabolic process	GO:0170040	FALSE	0.00158226	2.80072	79	744	8	78724	DDAH1,HNMT,IL4I1,KMO,SDSL,CARNS1,CBS,CDO1
GO:BP	somatic diversification of immune receptors	GO:0002200	FALSE	0.00158226	2.80072	79	744	8	78724	ADAR,AICDA,CD40,IL2,SANBR,SWAP70,MAD2L2,TBX21
GO:BP	positive regulation of protein catabolic process	GO:0045732	FALSE	0.00160801	2.79371	209	744	12	78724	CAV1,NSF,NUB1,AKT1,AXIN1,DDA1,MAPK9,NDUFA13,PLK3,SH3RF3,SMAD7,TRIM32
GO:BP	regulation of chemotaxis	GO:0050920	FALSE	0.00160801	2.79371	209	744	12	78724	C3AR1,C5,CCR2,CXCL10,DUSP3,HSPB1,LGALS9,NCKAP1L,PTPRO,SLAMF1,SWAP70,PDGFD
GO:BP	protein secretion	GO:0009306	FALSE	0.00163973	2.78523	379	744	16	78724	FFAR2,GNAS,GOLPH3L,IL1RN,INHBB,JAK2,RSAD2,TRPM4,ACVR2B,ADTRP,EXPH5,F2R,PER2,PRF1,RAB40B,TACR2
GO:BP	steroid metabolic process	GO:0008202	FALSE	0.00172519	2.76316	335	744	15	78724	CHEK2,DHRS9,FECH,HSD17B4,HSD17B6,OSBPL1A,PRLR,ACADVL,AKR1C3,DGKQ,DHCR24,DHRS11,EPHX2,HINT2,SULT1E1
GO:BP	hormone transport	GO:0009914	FALSE	0.00172519	2.76316	335	744	15	78724	BTK,EXOC3L1,FFAR2,GNAS,IL1RN,INHBB,JAK2,TRPM4,ACVR2B,GDF9,GNRHR,NKX3-1,PER2,SMPD3,TACR2
GO:BP	regulation of alpha-beta T cell differentiation	GO:0046637	FALSE	0.00174355	2.75856	80	744	8	78724	CD86,HLA-DRA,IL2,LGALS9,NCKAP1L,ASCL2,SMAD7,TBX21
GO:BP	toll-like receptor signaling pathway	GO:0002224	FALSE	0.00174355	2.75856	80	744	8	78724	BTK,CD274,CD40,IRAK3,IRF7,SCIMP,TLR10,TLR7
GO:BP	respiratory gaseous exchange by respiratory system	GO:0007585	FALSE	0.00174355	2.75856	80	744	8	78724	CFAP54,HNMT,KDM6A,NLGN1,NTSR1,ODAD4,ZFAND5,NDN
GO:BP	generation of precursor metabolites and energy	GO:0006091	FALSE	0.00180584	2.74332	478	744	18	78724	ACO1,FECH,IDH1,NDUFV3,OAS1,PHKB,PNPT1,RUBCNL,SNCA,ZBTB20,ACADVL,AKT1,DDIT4,NDUFA13,NDUFB8,PER2,PFKFB1,THAP11
GO:BP	isotype switching	GO:0045190	FALSE	0.00181423	2.74131	56	744	7	78724	AICDA,CD40,IL2,SANBR,SWAP70,MAD2L2,TBX21
GO:BP	regulation of tyrosine phosphorylation of STAT protein	GO:0042509	FALSE	0.00181423	2.74131	56	744	7	78724	CAV1,CD40,IL2,IL31RA,JAK2,PARP14,PARP9
GO:BP	somatic diversification of immunoglobulins involved in immune response	GO:0002208	FALSE	0.00181423	2.74131	56	744	7	78724	AICDA,CD40,IL2,SANBR,SWAP70,MAD2L2,TBX21
GO:BP	somatic recombination of immunoglobulin genes involved in immune response	GO:0002204	FALSE	0.00181423	2.74131	56	744	7	78724	AICDA,CD40,IL2,SANBR,SWAP70,MAD2L2,TBX21
GO:BP	establishment of protein localization to extracellular region	GO:0035592	FALSE	0.0018171	2.74062	382	744	16	78724	FFAR2,GNAS,GOLPH3L,IL1RN,INHBB,JAK2,RSAD2,TRPM4,ACVR2B,ADTRP,EXPH5,F2R,PER2,PRF1,RAB40B,TACR2
GO:BP	regulation of cell killing	GO:0031341	FALSE	0.00188267	2.72523	109	744	9	78724	CD1C,CLEC7A,FCGR2B,HLA-DRA,LGALS9,NCKAP1L,CD1B,KLRD1,PRF1
GO:BP	JNK cascade	GO:0007254	FALSE	0.00188349	2.72504	175	744	11	78724	DUSP3,FCGR2B,MAP3K20,NAIP,SLAMF1,STRADB,TLR7,WNT16,AXIN1,MAPK9,SH3RF3
GO:BP	L-amino acid metabolic process	GO:0170033	FALSE	0.00188349	2.72504	175	744	11	78724	DDAH1,HNMT,IL4I1,KMO,SDSL,SLC45A2,CARNS1,CBS,CDO1,FPGS,RIMKLA
GO:BP	mitotic cell cycle process	GO:1903047	FALSE	0.00190156	2.72089	745	744	23	78724	CCNA1,CDK14,CHEK2,DDX3X,KANK2,MAP3K20,NFIB,PHIP,PSME2,RB1,RBBP8,AKT1,CCNB3,CCND3,DAPK3,FBXW5,KIFC2,MAD2L2,MUS81,PLK3,PRMT2,SMPD3,TOM1L2
GO:BP	negative regulation of exocytosis	GO:0045920	FALSE	0.001908	2.71942	36	744	6	78724	C9ORF72,CCR2,FCGR2B,LGALS9,NCKAP1L,SNCA
GO:BP	regulation of myeloid cell differentiation	GO:0045637	FALSE	0.001963	2.70708	213	744	12	78724	C1QC,FAM210B,H4C1,IRF7,ISG15,NCKAP1L,RB1,STAT1,DLL1,LDB1,PRXL2A,ZFPM1
GO:BP	male sex differentiation	GO:0046661	FALSE	0.00199206	2.7007	176	744	11	78724	BCL2L1,CSMD1,HSD17B4,INHBB,LHFPL2,NASP,TNFSF10,YBX3,AKR1C3,DHCR24,NKX3-1
GO:BP	interleukin-1 production	GO:0032612	FALSE	0.00203333	2.69179	110	744	9	78724	AIM2,CASP1,CLEC7A,HSPB1,IFI16,JAK2,LGALS9,NAIP,F2R
GO:BP	regulation of interleukin-1 production	GO:0032652	FALSE	0.00203333	2.69179	110	744	9	78724	AIM2,CASP1,CLEC7A,HSPB1,IFI16,JAK2,LGALS9,NAIP,F2R
GO:BP	amine metabolic process	GO:0009308	FALSE	0.00203333	2.69179	110	744	9	78724	AANAT,GCH1,HNMT,IL4I1,KMO,MAOB,SAT1,SLC44A1,SNCA
GO:BP	acute inflammatory response	GO:0002526	FALSE	0.00203333	2.69179	110	744	9	78724	BTK,EIF2AK1,FCGR2B,FFAR2,IL1RN,IL31RA,OSMR,PLSCR1,PTGES
GO:BP	regionalization	GO:0003002	FALSE	0.00204096	2.69017	433	744	17	78724	BHLHE41,C1QA,CC2D2A,CCDC39,HHEX,KDM6A,MIB1,ODAD4,SEMA3C,TDRD1,TDRD7,ACVR2B,AXIN1,DLL1,LDB1,NKX3-1,NLE1
GO:BP	alpha-amino acid metabolic process	GO:1901605	FALSE	0.00206193	2.68573	214	744	12	78724	DDAH1,HNMT,IL4I1,KMO,SDSL,SLC45A2,SLC7A7,CARNS1,CBS,CDO1,FPGS,RIMKLA
GO:BP	regulation of intrinsic apoptotic signaling pathway	GO:2001242	FALSE	0.0021061	2.67652	177	744	11	78724	BCL2L1,CAV1,DDIAS,DDX3X,FCGR2B,HSPB1,KDM6A,YBX3,AKT1,NKX3-1,TRIM32
GO:BP	natural killer cell mediated immunity	GO:0002228	FALSE	0.00210854	2.67602	82	744	8	78724	CALHM6,LGALS9,LYST,GZMB,KIR3DL1,KLRD1,NKG7,SH2D1B
GO:BP	regulation of mononuclear cell migration	GO:0071675	FALSE	0.00221042	2.65553	143	744	10	78724	C3AR1,C5,CCR2,CXCL10,LGALS9,SLAMF1,ADTRP,AKT1,ASCL2,PDGFD
GO:BP	protein localization to extracellular region	GO:0071692	FALSE	0.00222467	2.65274	388	744	16	78724	FFAR2,GNAS,GOLPH3L,IL1RN,INHBB,JAK2,RSAD2,TRPM4,ACVR2B,ADTRP,EXPH5,F2R,PER2,PRF1,RAB40B,TACR2
GO:BP	proteinogenic amino acid metabolic process	GO:0170039	FALSE	0.00222583	2.65251	178	744	11	78724	DDAH1,HNMT,IL4I1,KMO,SDSL,SLC45A2,CARNS1,CBS,CDO1,FPGS,RIMKLA
GO:BP	negative regulation of signal transduction in absence of ligand	GO:1901099	FALSE	0.00225908	2.64607	37	744	6	78724	BCL2L1,IFI6,IL7,NRG1,STRADB,AKT1
GO:BP	negative regulation of extrinsic apoptotic signaling pathway in absence of ligand	GO:2001240	FALSE	0.00225908	2.64607	37	744	6	78724	BCL2L1,IFI6,IL7,NRG1,STRADB,AKT1
GO:BP	positive regulation of growth	GO:0045927	FALSE	0.00226919	2.64413	256	744	13	78724	BCL11A,DDX3X,IL2,IL7,NRG1,RICTOR,YBX3,AKT1,DLL1,ERBB2,PRR5,SMAD7,TRIM32
GO:BP	response to radiation	GO:0009314	FALSE	0.00231164	2.63608	437	744	17	78724	AANAT,BCL2L1,CASP7,CHEK2,CXCL10,FECH,IFI16,MAP3K20,POLK,SLC1A3,AKT1,NR2F6,PER2,PER3,PLK3,RGS9,TRIM32
GO:BP	CD4-positive, alpha-beta T cell differentiation involved in immune response	GO:0002294	FALSE	0.0023142	2.6356	83	744	8	78724	CD86,HLA-DRA,IL2,LGALS9,ASCL2,SMAD7,TBX21,ZFPM1
GO:BP	cellular response to ketone	GO:1901655	FALSE	0.00236615	2.62596	112	744	9	78724	ADCY6,FECH,GNAS,JAK2,XRN1,AKR1C3,AKT1,DDIT4,PTGDR
GO:BP	carbohydrate derivative catabolic process	GO:1901136	FALSE	0.00236967	2.62531	257	744	13	78724	AICDA,ALDH1A1,BTK,CTSL,HEXB,MBD4,NT5C2,ZBTB20,CHI3L1,DDIT4,OVGP1,PDE9A,PFKFB1
GO:BP	maintenance of location	GO:0051235	FALSE	0.00250322	2.6015	218	744	12	78724	CAV1,CD19,CLIC2,CXCL10,CXCL9,HEXB,NTSR1,SNCA,SP100,AKT1,F2R,PLCH2
GO:BP	dephosphorylation	GO:0016311	FALSE	0.00250322	2.6015	218	744	12	78724	DAPP1,DUSP3,MTMR11,PDP1,PLPP3,PTPRF,PTPRO,DUSP2,EPHX2,PTP4A3,PTPN7,SYNJ2
GO:BP	alpha-beta T cell activation involved in immune response	GO:0002287	FALSE	0.0025367	2.59573	84	744	8	78724	CD86,HLA-DRA,IL2,LGALS9,ASCL2,SMAD7,TBX21,ZFPM1
GO:BP	alpha-beta T cell differentiation involved in immune response	GO:0002293	FALSE	0.0025367	2.59573	84	744	8	78724	CD86,HLA-DRA,IL2,LGALS9,ASCL2,SMAD7,TBX21,ZFPM1
GO:BP	regulation of exocytosis	GO:0017157	FALSE	0.00262172	2.58141	181	744	11	78724	C9ORF72,CCR2,FCGR2B,LGALS9,NCKAP1L,NLGN1,NSF,S100A10,SNCA,EXPH5,SMPD3
GO:BP	response to prostaglandin	GO:0034694	FALSE	0.0026612	2.57492	38	744	6	78724	AANAT,ADCY6,GNAS,AKR1C3,AKT1,PTGDR
GO:BP	negative regulation of CD4-positive, alpha-beta T cell activation	GO:2000515	FALSE	0.0026612	2.57492	38	744	6	78724	CD274,IL2,LGALS9,ASCL2,SMAD7,TBX21
GO:BP	modulation by symbiont of entry into host	GO:0052372	FALSE	0.0026612	2.57492	38	744	6	78724	CAV1,LGALS9,TRIM22,TRIM38,TRIM5,TRIM58
GO:BP	microtubule-based transport	GO:0099111	FALSE	0.0027537	2.56008	220	744	12	78724	CCDC39,CFAP54,HSPB1,MAP2,ODAD4,TRAK2,TRIM58,TTC21A,BAG3,DYNC2I1,FEZ1,TUB
GO:BP	endothelial cell migration	GO:0043542	FALSE	0.00288705	2.53955	221	744	12	78724	CD40,FAP,FSTL1,HSPB1,PLPP3,RIN2,SASH1,SP100,STARD13,ADTRP,AKT1,PTP4A3
GO:BP	carboxylic acid transmembrane transport	GO:1905039	FALSE	0.00302161	2.51976	148	744	10	78724	NTSR1,SLC1A3,SLC38A5,SLC38A9,SLC7A7,TSPO2,AKT1,PER2,SLC25A29,SLC25A32
GO:BP	response to mechanical stimulus	GO:0009612	FALSE	0.00302608	2.51912	222	744	12	78724	CALB1,CASP1,CD40,CXCL10,KIAA0319,SCN9A,SLC1A3,STAT1,STRBP,TLR7,BAG3,CHI3L1
GO:BP	regulation of neuron projection development	GO:0010975	FALSE	0.00304291	2.51671	446	744	17	78724	ADCY6,ARHGAP44,BCL11A,KIAA0319,MAP2,NLGN1,PDLIM5,PTPRF,PTPRO,AKT1,AMIGO1,CDK5R1,DAB1,EEF2K,FEZ1,METRN,NRCAM
GO:BP	positive regulation of cell cycle	GO:0045787	FALSE	0.00306993	2.51287	351	744	15	78724	DDX3X,DUSP3,E2F8,MAP3K20,PHIP,PKN2,PLSCR1,RB1,SMC6,AKT1,CCND3,MRGPRX2,NKX3-1,SMPD3,TRIM32
GO:BP	purine ribonucleotide metabolic process	GO:0009150	FALSE	0.00306993	2.51287	351	744	15	78724	ADCY6,ATP1B1,NDUFV3,NME4,NT5C2,ZBTB20,AK5,DDIT4,LRGUK,NDUFA13,NDUFB8,NME3,PDE9A,PFKFB1,SULT1E1
GO:BP	negative regulation of cell projection organization	GO:0031345	FALSE	0.00307816	2.51171	184	744	11	78724	ADCY6,ARHGAP24,ARHGAP44,BCL11A,KIAA0319,MAP2,NLGN1,PTPRO,AKT1,DAB1,TRIM32
GO:BP	regulation of T-helper 17 type immune response	GO:2000316	FALSE	0.00311992	2.50586	39	744	6	78724	CLEC7A,IL2,JAK2,ASCL2,SMAD7,TBX21
GO:BP	inorganic ion import across plasma membrane	GO:0099587	FALSE	0.00341083	2.46714	117	744	9	78724	ATP1B1,CACNA1A,CACNA1E,MS4A1,SLC8A3,SLC9A9,TRPM4,AKAP5,SLC12A1
GO:BP	inorganic cation import across plasma membrane	GO:0098659	FALSE	0.00341083	2.46714	117	744	9	78724	ATP1B1,CACNA1A,CACNA1E,MS4A1,SLC8A3,SLC9A9,TRPM4,AKAP5,SLC12A1
GO:BP	Notch signaling pathway	GO:0007219	FALSE	0.0034199	2.46599	186	744	11	78724	BEND6,DTX3L,MIB1,AKT1,DLL1,DTX3,FAT4,LLGL2,MFNG,NLE1,PTP4A3
GO:BP	adenylate cyclase-modulating G protein-coupled receptor signaling pathway	GO:0007188	FALSE	0.0034682	2.4599	266	744	13	78724	ADCY6,CALCRL,CXCL10,CXCL9,GNAS,MARCO,ADGRG5,AKAP5,DGKQ,GPR176,PDE3B,PTGDR2,S1PR5
GO:BP	anterior/posterior pattern specification	GO:0009952	FALSE	0.00347933	2.4585	225	744	12	78724	BHLHE41,HHEX,KDM6A,MIB1,SEMA3C,TDRD1,TDRD7,ACVR2B,DLL1,LDB1,NKX3-1,NLE1
GO:BP	negative regulation of cell development	GO:0010721	FALSE	0.00361458	2.44194	267	744	13	78724	BCL11A,C1QC,FCGR2B,IL2,KIAA0319,MAP2,RB1,ASCL2,DAB1,ERBB2,SMAD7,TBX21,ZFPM1
GO:BP	response to cAMP	GO:0051591	FALSE	0.00361826	2.4415	88	744	8	78724	AANAT,INHBB,PNPT1,STAT1,CDO1,DGKQ,EEF2K,PFKFB1
GO:BP	negative regulation of lymphocyte proliferation	GO:0050672	FALSE	0.00361826	2.4415	88	744	8	78724	BTK,CD274,FCGR2B,IL2,IL4I1,LGALS9,PAWR,ERBB2
GO:BP	regulation of postsynapse organization	GO:0099175	FALSE	0.00362361	2.44086	151	744	10	78724	ARHGAP44,DOCK4,FCGR2B,NLGN1,PDLIM5,AKT1,CDK5R1,CYFIP2,EEF2K,NRCAM
GO:BP	blood vessel diameter maintenance	GO:0097746	FALSE	0.00362361	2.44086	151	744	10	78724	ADCY6,CAV1,DOCK4,GCH1,SMTNL1,TRPM4,CBS,F2R,MANF,PER2
GO:BP	regulation of tube diameter	GO:0035296	FALSE	0.00362361	2.44086	151	744	10	78724	ADCY6,CAV1,DOCK4,GCH1,SMTNL1,TRPM4,CBS,F2R,MANF,PER2
GO:BP	regulation of T cell cytokine production	GO:0002724	FALSE	0.00364115	2.43876	40	744	6	78724	CCR2,RSAD2,SLAMF1,TRPM4,SMAD7,TBX21
GO:BP	T cell cytokine production	GO:0002369	FALSE	0.00364115	2.43876	40	744	6	78724	CCR2,RSAD2,SLAMF1,TRPM4,SMAD7,TBX21
GO:BP	regulation of cellular component size	GO:0032535	FALSE	0.00365087	2.4376	356	744	15	78724	BCL11A,DNM1,KANK2,KDM6A,KIAA0319,MAP2,NCKAP1L,RICTOR,SPTA1,SWAP70,TMOD2,CYFIP2,FMN1,NRCAM,SLC12A1
GO:BP	activation of protein kinase activity	GO:0032147	FALSE	0.00366308	2.43615	62	744	7	78724	JAK2,NRG1,PRLR,STRADB,TNFSF15,AXIN1,CHI3L1
GO:BP	regulation of tube size	GO:0035150	FALSE	0.00384622	2.41497	152	744	10	78724	ADCY6,CAV1,DOCK4,GCH1,SMTNL1,TRPM4,CBS,F2R,MANF,PER2
GO:BP	organic acid transmembrane transport	GO:1903825	FALSE	0.00384622	2.41497	152	744	10	78724	NTSR1,SLC1A3,SLC38A5,SLC38A9,SLC7A7,TSPO2,AKT1,PER2,SLC25A29,SLC25A32
GO:BP	cellular response to prostaglandin stimulus	GO:0071379	FALSE	0.00388182	2.41096	23	744	5	78724	ADCY6,GNAS,AKR1C3,AKT1,PTGDR
GO:BP	striated muscle contraction	GO:0006941	FALSE	0.00399492	2.39849	189	744	11	78724	ATP1B1,CAV1,CLIC2,MAP2K6,SCN9A,SLC8A3,TRPM4,MYBPH,SCN2A,SMAD7,STAC
GO:BP	development of primary male sexual characteristics	GO:0046546	FALSE	0.00408063	2.38927	153	744	10	78724	BCL2L1,CSMD1,HSD17B4,INHBB,LHFPL2,NASP,TNFSF10,YBX3,AKR1C3,NKX3-1
GO:BP	organic cation transport	GO:0015695	FALSE	0.00421143	2.37557	120	744	9	78724	SLC38A5,SLC38A9,SLC44A1,SLC7A7,SNCA,TSPO2,LLGL2,SLC25A29,TACR2
GO:BP	regulation of nervous system development	GO:0051960	FALSE	0.0042167	2.37503	457	744	17	78724	BCL11A,BHLHE41,KIAA0319,MAP2,NLGN1,RB1,S100A10,SLITRK4,AKT1,AMIGO1,ASCL2,DAB1,DLL1,EEF2K,METRN,PER2,TRIM32
GO:BP	negative regulation of mononuclear cell proliferation	GO:0032945	FALSE	0.00429183	2.36736	90	744	8	78724	BTK,CD274,FCGR2B,IL2,IL4I1,LGALS9,PAWR,ERBB2
GO:BP	cellular response to peptide hormone stimulus	GO:0071375	FALSE	0.0042946	2.36708	315	744	14	78724	ADCY6,BCAR3,CAV1,GNAS,INHBB,JAK2,KDM6A,PHIP,RB1,STAT1,AKT1,EEF2K,GNRHR,PDE3B
GO:BP	positive regulation of cell development	GO:0010720	FALSE	0.00434141	2.36237	458	744	17	78724	BCL11A,BTK,CD86,CLEC7A,HLA-DRA,IL15,IL2,IL4I1,IL7,LGALS9,NCKAP1L,RB1,AMIGO1,EEF2K,METRN,SMAD7,TRIM32
GO:BP	positive regulation of viral process	GO:0048524	FALSE	0.00455207	2.34179	64	744	7	78724	ADAR,DDX3X,IFIT1,LGALS9,PKN2,TRIM38,TMEM250
GO:BP	somatic recombination of immunoglobulin gene segments	GO:0016447	FALSE	0.00455207	2.34179	64	744	7	78724	AICDA,CD40,IL2,SANBR,SWAP70,MAD2L2,TBX21
GO:BP	regulation of muscle system process	GO:0090257	FALSE	0.00456914	2.34017	231	744	12	78724	ATP1B1,CAV1,CLIC2,DOCK4,SLC8A3,TRPM4,DAPK3,F2R,MYBPH,PDE9A,SMAD7,TACR2
GO:BP	post-transcriptional regulation of gene expression	GO:0010608	FALSE	0.00471355	2.32665	1088	744	28	78724	ACO1,ADAR,BANK1,CAV1,DDX3X,EIF2AK1,EIF2AK2,FECH,GCNT2,HELZ2,HSPB1,MAP3K20,NSUN3,PARP9,PNPT1,SAMD4A,TDRD7,TENT5A,TENT5C,XRN1,YBX3,AKT1,DAPK3,EEF2K,ERBB2,GZMB,PARP16,SARNP
GO:BP	regulated exocytosis	GO:0045055	FALSE	0.00477743	2.32081	232	744	12	78724	BTK,CCR2,FCGR2B,LGALS9,MILR1,NCKAP1L,NLGN1,SNCA,MRGPRX2,NKG7,PTGDR,TMEM79
GO:BP	modulation of process of another organism	GO:0035821	FALSE	0.00483075	2.31599	122	744	9	78724	CHD1,CLEC7A,IFI27,IFITM3,LY6E,SMC6,TRIM5,APOBEC3H,PRF1
GO:BP	embryonic organ development	GO:0048568	FALSE	0.00501623	2.29962	463	744	17	78724	CC2D2A,CCDC39,E2F8,HESX1,KDM6A,MIB1,PAX5,SOBP,WNT16,AKT1,ASCL2,COL18A1,DLL1,DYNC2I1,MYO6,ST14,ZFPM1
GO:BP	post-embryonic development	GO:0009791	FALSE	0.00506904	2.29507	92	744	8	78724	ACO1,JAK2,SCN9A,SEMA3C,ZFX,ACVR2B,NDN,SELENOP
GO:BP	T cell differentiation involved in immune response	GO:0002292	FALSE	0.00506904	2.29507	92	744	8	78724	CD86,HLA-DRA,IL2,LGALS9,ASCL2,SMAD7,TBX21,ZFPM1
GO:BP	regulation of small molecule metabolic process	GO:0062012	FALSE	0.00515239	2.28799	320	744	14	78724	CAV1,LACC1,NTSR1,SLC7A7,SNCA,ZBTB20,ACADVL,AKR1C3,AKT1,CD320,DDIT4,DGKQ,EPHX2,PFKFB1
GO:BP	positive regulation of release of sequestered calcium ion into cytosol	GO:0051281	FALSE	0.00564568	2.24828	43	744	6	78724	CD19,CXCL10,CXCL9,NTSR1,SNCA,F2R
GO:BP	response to corticosteroid	GO:0031960	FALSE	0.00576556	2.23916	159	744	10	78724	AANAT,CYBB,FECH,IL1RN,JAK2,MAOB,AKR1C3,CDO1,DDIT4,PFKFB1
GO:BP	regulation of proteasomal protein catabolic process	GO:0061136	FALSE	0.0059621	2.2246	197	744	11	78724	CAV1,LAMP3,NUB1,PSME2,USP25,AKT1,AXIN1,DDA1,MAPK9,SH3RF3,SMAD7
GO:BP	regulation of non-canonical NF-kappaB signal transduction	GO:1901222	FALSE	0.00596253	2.22457	94	744	8	78724	CD86,DDX3X,EIF2AK2,IFI35,LGALS9,SASH1,TLR7,PTP4A3
GO:BP	cellular response to molecule of fungal origin	GO:0071226	FALSE	0.00596288	2.22454	4	744	3	78724	BTK,CLEC7A,SCIMP
GO:BP	ribonucleotide metabolic process	GO:0009259	FALSE	0.00622972	2.20553	372	744	15	78724	ADCY6,ATP1B1,NDUFV3,NME4,NT5C2,ZBTB20,AK5,DDIT4,LRGUK,NDUFA13,NDUFB8,NME3,PDE9A,PFKFB1,SULT1E1
GO:BP	positive regulation of autophagy	GO:0010508	FALSE	0.00644761	2.1906	161	744	10	78724	C9ORF72,EIF2AK1,SPTLC2,TRIM22,TRIM38,TRIM5,TRIM58,BAG3,PLK3,TRIM32
GO:BP	regulation of erythrocyte differentiation	GO:0045646	FALSE	0.00648488	2.1881	44	744	6	78724	FAM210B,ISG15,NCKAP1L,STAT1,LDB1,ZFPM1
GO:BP	organelle assembly	GO:0070925	FALSE	0.00670349	2.1737	1046	744	27	78724	AP1S2,AP1S3,C9ORF72,CC2D2A,CCDC39,CEP162,CFAP54,CHEK2,DDX3X,DIAPH3,DNAH8,HPS5,NLGN1,ODAD4,TMOD2,AKT1,BAG3,DYNC2I1,FEZ1,KIFC2,LRGUK,MAPK9,MYBPH,NLE1,TMEM250,TP53INP2,TRIM32
GO:BP	positive regulation of cell growth	GO:0030307	FALSE	0.00681412	2.16659	162	744	10	78724	BCL11A,DDX3X,IL2,NRG1,RICTOR,AKT1,ERBB2,PRR5,SMAD7,TRIM32
GO:BP	cellular process involved in reproduction in multicellular organism	GO:0022412	FALSE	0.00692069	2.15985	424	744	16	78724	BCL2L1,CFAP54,FOLR2,FOLR3,HEXB,HORMAD1,INHBB,SMCHD1,STRBP,TDRD1,TDRD7,TTC21A,ZFX,AKT1,GDF9,NDN
GO:BP	vesicle organization	GO:0016050	FALSE	0.00708747	2.14951	376	744	15	78724	AP1S2,AP1S3,CAV1,DIAPH3,DNAJC13,DNM1,GOLPH3L,HPS5,LYST,RUBCNL,S100A10,SAMD9,SLAMF1,SNCA,F2R
GO:BP	positive regulation of establishment of protein localization	GO:1904951	FALSE	0.00708771	2.14949	329	744	14	78724	FFAR2,GOLPH3L,JAK2,TRPM4,AKAP5,BAG3,CDK5R1,ERBB2,EXPH5,GZMB,HSPA1L,PLK3,PRR5L,PTP4A3
GO:BP	positive regulation of interferon-alpha production	GO:0032727	FALSE	0.00741254	2.13003	26	744	5	78724	DDX3X,IFIH1,IRF7,STAT1,TLR7
GO:BP	negative regulation of leukocyte proliferation	GO:0070664	FALSE	0.00755139	2.12197	97	744	8	78724	BTK,CD274,FCGR2B,IL2,IL4I1,LGALS9,PAWR,ERBB2
GO:BP	somatic diversification of immunoglobulins	GO:0016445	FALSE	0.00758956	2.11978	69	744	7	78724	AICDA,CD40,IL2,SANBR,SWAP70,MAD2L2,TBX21
GO:BP	regulation of Wnt signaling pathway	GO:0030111	FALSE	0.00759682	2.11937	331	744	14	78724	CAV1,CDK14,DDX3X,DEPDC1B,HHEX,PLPP3,PTPRO,SIAH2,TRPM4,AXIN1,DAPK3,LGR6,MAD2L2,NLE1
GO:BP	signal transduction by p53 class mediator	GO:0072331	FALSE	0.0076017	2.11909	164	744	10	78724	CHEK2,IFI16,MAP2K6,SETD9,SP100,ZNF385B,AKT1,DDIT4,MYO6,PLK3
GO:BP	mitotic cell cycle phase transition	GO:0044772	FALSE	0.00779009	2.10846	428	744	16	78724	CCNA1,CDK14,CHEK2,DDX3X,KANK2,MAP3K20,NFIB,PSME2,RB1,RBBP8,AKT1,CCNB3,CCND3,MAD2L2,PLK3,PRMT2
GO:BP	regulation of reproductive process	GO:2000241	FALSE	0.00794947	2.09966	203	744	11	78724	BCL2L1,EAF2,HORMAD1,INHBB,LHFPL2,YBX3,GDF9,NKX3-1,OVGP1,PTGDR2,TACR2
GO:BP	immune system development	GO:0002520	FALSE	0.00794947	2.09966	203	744	11	78724	ADAR,AICDA,CD40,IL15,IL2,IRAK3,LGALS9,SANBR,SWAP70,MAD2L2,TBX21
GO:BP	regulation of synapse assembly	GO:0051963	FALSE	0.00802424	2.0956	165	744	10	78724	DOCK4,GPC4,NLGN1,PDLIM5,SLITRK4,SNCA,AMIGO1,CYFIP2,EEF2K,NECTIN1
GO:BP	cellular response to oxygen levels	GO:0071453	FALSE	0.00802424	2.0956	165	744	10	78724	CAV1,CYBB,DDAH1,KDM6A,SLC8A3,AKT1,CBS,EEF2K,NKX3-1,SCN2A
GO:BP	ribose phosphate metabolic process	GO:0019693	FALSE	0.00804915	2.09425	380	744	15	78724	ADCY6,ATP1B1,NDUFV3,NME4,NT5C2,ZBTB20,AK5,DDIT4,LRGUK,NDUFA13,NDUFB8,NME3,PDE9A,PFKFB1,SULT1E1
GO:BP	muscle tissue development	GO:0060537	FALSE	0.00826045	2.083	430	744	16	78724	CAV1,COL19A1,NRG1,PAX5,PDLIM5,RB1,SEMA3C,SMAD1,SOX6,YBX3,ZFAND5,DLL1,MAFF,NR1D2,SMAD7,ZFPM1
GO:BP	response to fungus	GO:0009620	FALSE	0.0083643	2.07757	70	744	7	78724	BTK,CLEC4C,CLEC7A,SCIMP,ZBP1,GNLY,SPON2
GO:BP	L-alpha-amino acid transmembrane transport	GO:1902475	FALSE	0.0083643	2.07757	70	744	7	78724	NTSR1,SLC1A3,SLC38A5,SLC38A9,SLC7A7,PER2,SLC25A29
GO:BP	positive regulation of angiogenesis	GO:0045766	FALSE	0.00846698	2.07227	166	744	10	78724	C3AR1,CD40,CYBB,DDAH1,HSPB1,SASH1,SMAD1,CHI3L1,CLIC3,DLL1
GO:BP	respiratory system process	GO:0003016	FALSE	0.00846806	2.07222	46	744	6	78724	CFAP54,KDM6A,NLGN1,ODAD4,ZFAND5,NDN
GO:BP	regulation of phagocytosis	GO:0050764	FALSE	0.00879873	2.05558	99	744	8	78724	BTK,CLEC7A,FCGR2B,IL15,NCKAP1L,PLSCR1,IL2RB,TUB
GO:BP	defense response to protozoan	GO:0042832	FALSE	0.00902637	2.04449	27	744	5	78724	CD40,CLEC7A,GBP1,LYST,NKG7
GO:BP	positive regulation of phagocytosis	GO:0050766	FALSE	0.00920373	2.03604	71	744	7	78724	BTK,CLEC7A,FCGR2B,IL15,NCKAP1L,IL2RB,TUB
GO:BP	regulation of wound healing	GO:0061041	FALSE	0.00924286	2.03419	132	744	9	78724	CAV1,CLEC7A,FAP,SERPINB2,SERPING1,ADTRP,AJAP1,F2R,PHLDB2
GO:BP	TORC2 signaling	GO:0038203	FALSE	0.00944142	2.02496	13	744	4	78724	NCKAP1L,RICTOR,PRR5,PRR5L
GO:BP	negative regulation of transcription by competitive promoter binding	GO:0010944	FALSE	0.00944142	2.02496	13	744	4	78724	BHLHE41,HHEX,MAD2L2,SMAD7
GO:BP	negative regulation of leukocyte degranulation	GO:0043301	FALSE	0.00944142	2.02496	13	744	4	78724	CCR2,FCGR2B,LGALS9,NCKAP1L
GO:BP	negative regulation of cell cycle phase transition	GO:1901988	FALSE	0.00945648	2.02427	248	744	12	78724	CHEK2,DTX3L,HORMAD1,KANK2,MAP3K20,PARP9,RB1,RBBP8,MAD2L2,MUS81,PLK3,PRMT2
GO:BP	biogenic amine metabolic process	GO:0006576	FALSE	0.00948508	2.02296	100	744	8	78724	AANAT,GCH1,HNMT,IL4I1,KMO,MAOB,SAT1,SNCA
GO:BP	alpha-amino acid catabolic process	GO:1901606	FALSE	0.00948508	2.02296	100	744	8	78724	DDAH1,HNMT,IL4I1,KMO,SDSL,CARNS1,CBS,CDO1
GO:BP	positive regulation of tyrosine phosphorylation of STAT protein	GO:0042531	FALSE	0.00962979	2.01638	47	744	6	78724	CD40,IL2,IL31RA,JAK2,PARP14,PARP9
GO:BP	regulation of extrinsic apoptotic signaling pathway in absence of ligand	GO:2001239	FALSE	0.00962979	2.01638	47	744	6	78724	BCL2L1,IFI6,IL7,NRG1,STRADB,AKT1
GO:BP	positive regulation of vasculature development	GO:1904018	FALSE	0.00992459	2.00329	169	744	10	78724	C3AR1,CD40,CYBB,DDAH1,HSPB1,SASH1,SMAD1,CHI3L1,CLIC3,DLL1
GO:CC	cellular anatomical structure	GO:0110165	TRUE	5e-324	323.306	21620	744	725	78724	AANAT,ABCG2,ACO1,ACOT9,ADAM28,ADAR,ADCY6,AFF1,AICDA,AIM2,ALAS2,ALDH1A1,ANKRD29,ANO5,ANOS1,ANXA5,AP1S2,AP1S3,APOBEC3A,APOL6,ARHGAP24,ARHGAP44,ARL4A,ATP10D,ATP1B1,AUNIP,BANK1,BAZ2B,BCAM,BCAR3,BCL11A,BCL2L1,BEND6,BHLHE41,BLNK,BLVRA,BST2,BTK,BTLA,C1GALT1,C1QA,C1QB,C1QC,C3AR1,C5,C9ORF72,CA1,CACNA1A,CACNA1E,CACNA2D3,CALB1,CALCRL,CALHM6,CASP1,CASP7,CAV1,CC2D2A,CCDC181,CCDC39,CCDC50,CCDC68,CCNA1,CCR2,CCR…
GO:CC	cellular_component	GO:0005575	FALSE	5e-324	323.306	22149	744	728	78724	AANAT,ABCG2,ACO1,ACOT9,ADAM28,ADAR,ADCY6,AFF1,AICDA,AIM2,ALAS2,ALDH1A1,ANKRD29,ANO5,ANOS1,ANXA5,AP1S2,AP1S3,APOBEC3A,APOL6,ARHGAP24,ARHGAP44,ARL4A,ATP10D,ATP1B1,AUNIP,BANK1,BAZ2B,BCAM,BCAR3,BCL11A,BCL2L1,BEND6,BHLHE41,BLNK,BLVRA,BST2,BTK,BTLA,C1GALT1,C1QA,C1QB,C1QC,C3AR1,C5,C9ORF72,CA1,CACNA1A,CACNA1E,CACNA2D3,CALB1,CALCRL,CALHM6,CASP1,CASP7,CAV1,CC2D2A,CCDC181,CCDC39,CCDC50,CCDC68,CCNA1,CCR2,CCR…
GO:CC	intracellular anatomical structure	GO:0005622	FALSE	4.23E-251	250.373	17944	744	605	78724	AANAT,ABCG2,ACO1,ACOT9,ADAM28,ADAR,AFF1,AICDA,AIM2,ALAS2,ALDH1A1,ANO5,ANXA5,AP1S2,AP1S3,APOBEC3A,APOL6,ARHGAP24,ARHGAP44,ARL4A,ATP10D,AUNIP,BANK1,BAZ2B,BCAR3,BCL11A,BCL2L1,BEND6,BHLHE41,BLNK,BLVRA,BST2,BTK,C1GALT1,C3AR1,C9ORF72,CA1,CACNA1A,CALB1,CALCRL,CASP1,CASP7,CAV1,CC2D2A,CCDC181,CCDC39,CCDC50,CCDC68,CCNA1,CCR2,CCRL2,CD151,CD180,CD1C,CD22,CD274,CD40,CD86,CDK14,CEP162,CFAP54,CHD1,CHEK2,CIP2A,C…
GO:CC	cytoplasm	GO:0005737	FALSE	2.40E-247	246.62	12527	744	529	78724	AANAT,ABCG2,ACO1,ACOT9,ADAM28,ADAR,AICDA,AIM2,ALAS2,ALDH1A1,ANO5,ANXA5,AP1S2,AP1S3,APOBEC3A,APOL6,ARHGAP24,ARHGAP44,ARL4A,ATP10D,AUNIP,BANK1,BCAR3,BCL11A,BCL2L1,BLNK,BLVRA,BST2,BTK,C1GALT1,C3AR1,C9ORF72,CA1,CACNA1A,CALB1,CALCRL,CASP1,CASP7,CAV1,CC2D2A,CCDC181,CCDC39,CCDC50,CCDC68,CCNA1,CCR2,CCRL2,CD151,CD1C,CD22,CD274,CDK14,CEP162,CFAP54,CHD1,CHEK2,CIP2A,CLEC4C,CLEC7A,CLIC2,CMPK2,COL19A1,COL4A3,C…
GO:CC	organelle	GO:0043226	FALSE	1.15E-216	215.94	16936	744	562	78724	ABCG2,ACO1,ACOT9,ADAM28,ADAR,ADCY6,AFF1,AICDA,AIM2,ALAS2,ALDH1A1,ANO5,ANXA5,AP1S2,AP1S3,APOBEC3A,ARHGAP24,ARHGAP44,ARL4A,ATP10D,ATP1B1,AUNIP,BAZ2B,BCAM,BCL11A,BCL2L1,BEND6,BHLHE41,BLNK,BLVRA,BST2,BTK,C1GALT1,C3AR1,C5,C9ORF72,CA1,CACNA1A,CALB1,CALCRL,CASP1,CASP7,CAV1,CC2D2A,CCDC181,CCDC39,CCDC68,CCNA1,CCR2,CD180,CD19,CD1C,CD22,CD274,CD40,CD86,CDK14,CEP162,CFAP54,CHD1,CHEK2,CIP2A,CLEC4C,CLIC2,CMPK2…
GO:CC	membrane-bounded organelle	GO:0043227	FALSE	5.52E-195	194.258	15780	744	526	78724	ABCG2,ACO1,ACOT9,ADAM28,ADAR,ADCY6,AFF1,AICDA,AIM2,ALAS2,ALDH1A1,ANO5,ANXA5,AP1S2,AP1S3,APOBEC3A,ARHGAP44,ARL4A,ATP10D,ATP1B1,AUNIP,BAZ2B,BCAM,BCL11A,BCL2L1,BEND6,BHLHE41,BLNK,BLVRA,BST2,BTK,C1GALT1,C3AR1,C5,C9ORF72,CA1,CACNA1A,CALB1,CALCRL,CASP1,CASP7,CAV1,CC2D2A,CCDC181,CCDC39,CCDC68,CCNA1,CCR2,CD180,CD19,CD1C,CD22,CD274,CD40,CD86,CDK14,CEP162,CFAP54,CHD1,CHEK2,CLEC4C,CLIC2,CMPK2,COBLL1,COL19A1…
GO:CC	intracellular organelle	GO:0043229	FALSE	2.93E-187	186.533	16147	744	523	78724	ABCG2,ACO1,ACOT9,ADAM28,ADAR,AFF1,AICDA,AIM2,ALAS2,ANO5,ANXA5,AP1S2,AP1S3,APOBEC3A,ARHGAP24,ARHGAP44,ARL4A,ATP10D,AUNIP,BAZ2B,BCL11A,BCL2L1,BEND6,BHLHE41,BLNK,BST2,BTK,C1GALT1,C3AR1,C9ORF72,CACNA1A,CALB1,CALCRL,CASP1,CASP7,CAV1,CC2D2A,CCDC181,CCDC39,CCDC68,CCNA1,CCR2,CD180,CD1C,CD22,CD274,CD40,CD86,CDK14,CEP162,CFAP54,CHD1,CHEK2,CIP2A,CLEC4C,CLIC2,CMPK2,COL19A1,COL4A3,CPED1,CREB5,CRYBA1,CTSE,CTSL…
GO:CC	membrane	GO:0016020	FALSE	5.53E-164	163.258	9953	744	406	78724	ABCG2,ADAM28,ADAR,ADCY6,ALAS2,ANKRD29,ANO5,ANOS1,ANXA5,AP1S2,AP1S3,APOL6,ARHGAP44,ARL4A,ATP10D,ATP1B1,BCAM,BCAR3,BCL2L1,BLNK,BST2,BTK,BTLA,C1GALT1,C1QA,C1QB,C1QC,C3AR1,C5,C9ORF72,CACNA1A,CACNA1E,CACNA2D3,CALCRL,CALHM6,CASP1,CAV1,CCR2,CCRL2,CD151,CD180,CD19,CD1C,CD22,CD274,CD40,CD86,CDK14,CFAP54,CIP2A,CLCN1,CLEC10A,CLEC1A,CLEC4C,CLEC7A,CLIC2,COL4A3,CPNE8,CSMD1,CTSL,CXCL10,CXCL9,CYBB,DAPP1,DDX3X,DE…
GO:CC	intracellular membrane-bounded organelle	GO:0043231	FALSE	4.58E-162	161.339	14727	744	477	78724	ABCG2,ACO1,ACOT9,ADAM28,ADAR,AFF1,AICDA,AIM2,ALAS2,ANO5,ANXA5,AP1S2,AP1S3,APOBEC3A,ARHGAP44,ARL4A,ATP10D,AUNIP,BAZ2B,BCL11A,BCL2L1,BEND6,BHLHE41,BLNK,BST2,BTK,C1GALT1,C3AR1,C9ORF72,CACNA1A,CALB1,CALCRL,CASP1,CASP7,CAV1,CCNA1,CCR2,CD180,CD1C,CD22,CD274,CD40,CDK14,CEP162,CHD1,CHEK2,CLEC4C,CLIC2,CMPK2,COL19A1,COL4A3,CPED1,CREB5,CRYBA1,CTSE,CTSL,CTSV,CXORF38,CYBB,DCAF12,DDIAS,DDX3X,DHRS9,DIAPH3,DMXL2…
GO:CC	cell periphery	GO:0071944	FALSE	1.36E-110	109.867	6347	744	280	78724	ABCG2,ADAM28,ADCY6,ANO5,ANOS1,ANXA5,ARHGAP44,ARL4A,ATP10D,ATP1B1,BCAM,BLNK,BST2,BTK,BTLA,C1QA,C1QB,C1QC,C3AR1,C5,CACNA1A,CACNA1E,CACNA2D3,CALB1,CALCRL,CALHM6,CASP1,CAV1,CCR2,CCRL2,CD151,CD180,CD19,CD1C,CD22,CD274,CD40,CD86,CDK14,CIP2A,CLCN1,CLEC10A,CLEC1A,CLEC4C,CLEC7A,CLIC2,COL19A1,COL4A3,CPNE8,CTSL,CXCL10,CXCL9,CYBB,DAPP1,DDX3X,DIAPH3,DNAJC13,DNM1,DOCK4,DRAM2,DUSP3,EMP1,ENTPD2,EPB41L3,EXOC3L1,F…
GO:CC	plasma membrane	GO:0005886	FALSE	3.01E-104	103.521	5866	744	263	78724	ABCG2,ADAM28,ADCY6,ANO5,ANOS1,ANXA5,ARHGAP44,ARL4A,ATP10D,ATP1B1,BCAM,BLNK,BST2,BTK,BTLA,C1QA,C1QB,C1QC,C3AR1,C5,CACNA1A,CACNA1E,CACNA2D3,CALCRL,CALHM6,CASP1,CAV1,CCR2,CCRL2,CD151,CD180,CD19,CD1C,CD22,CD274,CD40,CD86,CDK14,CIP2A,CLCN1,CLEC10A,CLEC1A,CLEC4C,CLEC7A,CLIC2,CPNE8,CTSL,CXCL10,CXCL9,CYBB,DAPP1,DDX3X,DIAPH3,DNAJC13,DNM1,DOCK4,DRAM2,DUSP3,EMP1,ENTPD2,EPB41L3,FAP,FCGR2B,FCRL1,FCRL2,FCRL5,F…
GO:CC	cytosol	GO:0005829	FALSE	1.84E-101	100.735	5534	744	253	78724	AANAT,ACO1,ADAR,AICDA,AIM2,ALDH1A1,ANXA5,AP1S2,AP1S3,ARHGAP44,ARL4A,BCL11A,BCL2L1,BLNK,BLVRA,BTK,C9ORF72,CA1,CALB1,CASP1,CASP7,CC2D2A,CCDC39,CCDC50,CCNA1,CCR2,CD151,CDK14,CEP162,CIP2A,CLIC2,DAPP1,DCAF12,DDAH1,DDX3X,DDX60,DENND5B,DIAPH3,DNAJC13,DOCK4,DTX3L,DUSP3,E2F8,EIF2AK1,EIF2AK2,EIF2S3,EPB41L3,EVI5,FANCL,FGD4,GBP1,GBP3,GCH1,GK,GLRX5,GNAS,GNB4,GOLPH3L,GYPA,H2BC18,HELZ2,HERC5,HERC6,HNMT,HPS5,HSD…
GO:CC	endomembrane system	GO:0012505	FALSE	2.14E-69	68.6687	4872	744	200	78724	ACO1,ANO5,ANXA5,AP1S2,AP1S3,ARHGAP44,ATP10D,BCL2L1,BST2,C1GALT1,C3AR1,C9ORF72,CALCRL,CAV1,CD1C,CD22,CD274,CHEK2,CLEC4C,COL19A1,COL4A3,CPED1,CTSE,CTSL,CYBB,DDX3X,DHRS9,DIAPH3,DMXL2,DNAJC13,DNM1,DOCK4,DRAM2,DSE,DTX3L,ENTPD2,EXOC3L1,FAM8A1,FANCL,FGD4,FOLR3,FSTL1,GALNT5,GALNTL6,GASK1B,GBP1,GBP3,GCH1,GCNT1,GCNT2,GLYATL2,GNAS,GOLPH3L,GPC4,HEXB,HGF,HLA-DMA,HLA-DMB,HLA-DRA,HPS5,HSD17B6,IDH1,IFI27,IFI6,IF…
GO:CC	vesicle	GO:0031982	FALSE	1.11E-68	67.955	4033	744	182	78724	ACO1,ALDH1A1,ANO5,ANXA5,AP1S2,AP1S3,ARHGAP44,ATP1B1,BCAM,BCL2L1,BLVRA,BST2,BTK,C3AR1,C5,C9ORF72,CA1,CALB1,CALCRL,CAV1,CD19,CD1C,CD22,CD274,CD40,CD86,CLEC4C,COBLL1,CPNE8,CPVL,CREB5,CTSE,CTSL,CYBB,DDAH1,DDX3X,DIAPH3,DMXL2,DNAJC13,DNM1,DSE,DTX3L,EIF2S3,ENTPD2,EXOC3L1,FOLR3,FSTL1,GBP1,GBP3,GCH1,GK,GNAS,GNB4,GPC4,H2BC18,H4C1,HEXB,HGF,HLA-DMA,HLA-DMB,HLA-DRA,HNMT,HPS5,HSD17B6,HSPB1,IDH1,IFITM3,IL15,IL1…
GO:CC	extracellular region	GO:0005576	FALSE	2.36E-67	66.6265	4258	744	185	78724	ACO1,ADAM28,ALDH1A1,ANOS1,ANXA5,APOL6,ATP1B1,BCAM,BLVRA,BST2,C1QA,C1QB,C1QC,C5,C9ORF72,CA1,CALB1,CASP7,CCDC39,CD180,CD19,CD1C,CD22,CD274,CD40,CD86,CFAP54,COBLL1,COL19A1,COL4A3,CPNE8,CPVL,CREB5,CTSL,CTSV,CXCL10,CXCL9,DDAH1,DDX3X,DMXL2,DNAJC13,DNM1,EIF2S3,ENTPD2,FAM151B,FAP,FOLR2,FOLR3,FRMD4B,FSTL1,GBP1,GCNT1,GK,GNAS,GNB4,GPC4,H2BC18,H4C1,HEXB,HGF,HLA-DRA,HNMT,HSPB1,IDH1,IFI35,IFNE,IL15,IL1RN,IL2,I…
GO:CC	nucleus	GO:0005634	FALSE	2.22E-63	62.6528	10078	744	279	78724	ABCG2,ADAR,AFF1,AICDA,AIM2,APOBEC3A,ARL4A,ATP10D,AUNIP,BAZ2B,BCL11A,BCL2L1,BEND6,BHLHE41,BTK,C9ORF72,CACNA1A,CALB1,CASP1,CASP7,CCNA1,CCR2,CD180,CD274,CDK14,CEP162,CHD1,CHEK2,CLIC2,CMPK2,CREB5,CRYBA1,CTSL,CYBB,DCAF12,DDIAS,DDX3X,DIAPH3,DOCK4,DTX3L,DUSP3,E2F8,EAF2,EIF2AK1,EIF2AK2,ENSG00000288721,ETV7,EVI5,FANCL,FILIP1L,GCH1,GK,GNAS,GPC4,GYPA,H2BC18,H4C1,HELZ2,HERC6,HESX1,HHEX,HNMT,HNRNPH3,HORMAD1,H…
GO:CC	intracellular organelle lumen	GO:0070013	FALSE	2.67E-57	56.5728	6695	744	216	78724	ABCG2,ACOT9,ADAR,AFF1,AIM2,ALAS2,APOBEC3A,ARL4A,ATP10D,BCL11A,BCL2L1,CASP1,CASP7,CCNA1,CCR2,CD180,CD274,CDK14,CEP162,CHD1,CHEK2,CLIC2,CMPK2,COL19A1,COL4A3,CTSL,CTSV,DDX3X,DOCK4,DTX3L,DUSP3,E2F8,EAF2,EIF2AK2,ETV7,FANCL,FECH,FOLR3,FSTL1,GCH1,GLRX5,GPC4,GYPA,H2BC18,H4C1,HELZ2,HERC6,HEXB,HGF,HHEX,HNMT,HNRNPH3,HORMAD1,HSD17B4,IDH1,IFI16,IFI35,IL15,IL1RN,IRF7,IRF9,ISG15,JAK2,KDM6A,LMO2,LYSMD1,LYZ,MAP2K…
GO:CC	organelle lumen	GO:0043233	FALSE	2.67E-57	56.5728	6695	744	216	78724	ABCG2,ACOT9,ADAR,AFF1,AIM2,ALAS2,APOBEC3A,ARL4A,ATP10D,BCL11A,BCL2L1,CASP1,CASP7,CCNA1,CCR2,CD180,CD274,CDK14,CEP162,CHD1,CHEK2,CLIC2,CMPK2,COL19A1,COL4A3,CTSL,CTSV,DDX3X,DOCK4,DTX3L,DUSP3,E2F8,EAF2,EIF2AK2,ETV7,FANCL,FECH,FOLR3,FSTL1,GCH1,GLRX5,GPC4,GYPA,H2BC18,H4C1,HELZ2,HERC6,HEXB,HGF,HHEX,HNMT,HNRNPH3,HORMAD1,HSD17B4,IDH1,IFI16,IFI35,IL15,IL1RN,IRF7,IRF9,ISG15,JAK2,KDM6A,LMO2,LYSMD1,LYZ,MAP2K…
GO:CC	membrane-enclosed lumen	GO:0031974	FALSE	2.67E-57	56.5728	6695	744	216	78724	ABCG2,ACOT9,ADAR,AFF1,AIM2,ALAS2,APOBEC3A,ARL4A,ATP10D,BCL11A,BCL2L1,CASP1,CASP7,CCNA1,CCR2,CD180,CD274,CDK14,CEP162,CHD1,CHEK2,CLIC2,CMPK2,COL19A1,COL4A3,CTSL,CTSV,DDX3X,DOCK4,DTX3L,DUSP3,E2F8,EAF2,EIF2AK2,ETV7,FANCL,FECH,FOLR3,FSTL1,GCH1,GLRX5,GPC4,GYPA,H2BC18,H4C1,HELZ2,HERC6,HEXB,HGF,HHEX,HNMT,HNRNPH3,HORMAD1,HSD17B4,IDH1,IFI16,IFI35,IL15,IL1RN,IRF7,IRF9,ISG15,JAK2,KDM6A,LMO2,LYSMD1,LYZ,MAP2K…
GO:CC	intracellular membraneless organelle	GO:0043232	FALSE	2.04E-52	51.6913	6669	744	208	78724	ADAR,AICDA,AIM2,APOBEC3A,ARHGAP24,ARL4A,AUNIP,BAZ2B,BCL11A,BCL2L1,BHLHE41,C9ORF72,CALB1,CASP1,CAV1,CC2D2A,CCDC181,CCDC39,CCDC68,CCNA1,CCR2,CD180,CD274,CD86,CEP162,CFAP54,CHD1,CHEK2,CIP2A,CREB5,DCAF12,DDX3X,DDX60,DIAPH3,DNAH8,DNAI7,DNM1,DOCK4,E2F8,EIF2AK2,EML6,EPB41L3,ETV7,EVI5,FANCL,FGD4,FRMD3,FRMD4B,GAS2L3,GBP1,H2BC18,H4C1,HELZ2,HESX1,HHEX,HNMT,HORMAD1,HSPB1,IFI16,IFI35,IFIT5,IL1RN,IRF7,IRF9,JAK…
GO:CC	membraneless organelle	GO:0043228	FALSE	2.09E-52	51.6807	6670	744	208	78724	ADAR,AICDA,AIM2,APOBEC3A,ARHGAP24,ARL4A,AUNIP,BAZ2B,BCL11A,BCL2L1,BHLHE41,C9ORF72,CALB1,CASP1,CAV1,CC2D2A,CCDC181,CCDC39,CCDC68,CCNA1,CCR2,CD180,CD274,CD86,CEP162,CFAP54,CHD1,CHEK2,CIP2A,CREB5,DCAF12,DDX3X,DDX60,DIAPH3,DNAH8,DNAI7,DNM1,DOCK4,E2F8,EIF2AK2,EML6,EPB41L3,ETV7,EVI5,FANCL,FGD4,FRMD3,FRMD4B,GAS2L3,GBP1,H2BC18,H4C1,HELZ2,HESX1,HHEX,HNMT,HORMAD1,HSPB1,IFI16,IFI35,IFIT5,IL1RN,IRF7,IRF9,JAK…
GO:CC	extracellular space	GO:0005615	FALSE	6.08E-48	47.2161	3315	744	140	78724	ACO1,ALDH1A1,ANOS1,ANXA5,ATP1B1,BCAM,BLVRA,BST2,C1QC,C5,C9ORF72,CA1,CALB1,CASP7,CD180,CD19,CD1C,CD22,CD274,CD40,CD86,COBLL1,COL19A1,COL4A3,CPNE8,CPVL,CREB5,CTSL,CTSV,CXCL10,CXCL9,DDAH1,DDX3X,DMXL2,DNAJC13,DNM1,EIF2S3,ENTPD2,FAM151B,FAP,FRMD4B,FSTL1,GCNT1,GK,GNAS,GNB4,GPC4,H2BC18,H4C1,HEXB,HGF,HLA-DRA,HNMT,HSPB1,IDH1,IFI35,IFNE,IL15,IL1RN,IL2,IL7,INHBB,KMO,LAP3,LGALS9,LYZ,MMP17,MS4A1,MSR1,MTMR11,N…
GO:CC	nucleoplasm	GO:0005654	FALSE	7.32E-47	46.1354	4255	744	157	78724	ABCG2,ADAR,AFF1,AIM2,APOBEC3A,ARL4A,ATP10D,BCL11A,CASP7,CCNA1,CD180,CD274,CDK14,CEP162,CHD1,CHEK2,CLIC2,CMPK2,DDX3X,DTX3L,DUSP3,E2F8,EAF2,EIF2AK2,ETV7,FANCL,GCH1,GYPA,H2BC18,H4C1,HELZ2,HERC6,HHEX,HNMT,HNRNPH3,IFI16,IFI35,IL15,IL1RN,IRF7,IRF9,ISG15,JAK2,KDM6A,LMO2,LYSMD1,MAP2K6,MBD4,MBNL3,MIS18BP1,MS4A1,MXI1,NASP,NFIB,NRG1,NUB1,OAS1,OAS2,OAS3,OASL,PARM1,PARP9,PAX5,PHF11,PKN2,PLEKHG1,PLSCR1,POLK,PO…
GO:CC	organelle membrane	GO:0031090	FALSE	1.04E-44	43.9842	3842	744	146	78724	ABCG2,ALAS2,ANO5,ANXA5,AP1S2,AP1S3,ATP10D,ATP1B1,BCL2L1,BST2,C1GALT1,C3AR1,C9ORF72,CAV1,CD1C,CD274,CLEC4C,CYBB,DHRS9,DIAPH3,DMXL2,DNAJC13,DRAM2,DSE,DTX3L,ENTPD2,FAM210B,FAM8A1,FECH,GALNT5,GALNTL6,GASK1B,GBP1,GBP3,GCH1,GCNT1,GCNT2,GK,GNAS,GNB4,GOLPH3L,HLA-DMA,HLA-DMB,HLA-DRA,HSD17B4,HSD17B6,IFI27,IFI6,IFITM3,IRF7,KIAA0319,KMO,LAMP3,LHFPL2,MAOB,MARCHF1,MARCHF3,MARCHF8,MARCO,MRC1,MRPL12,MSR1,MX1,NAV…
GO:CC	cytoplasmic vesicle	GO:0031410	FALSE	1.58E-40	39.8026	2556	744	114	78724	ANXA5,AP1S2,AP1S3,ARHGAP44,BCL2L1,BST2,BTK,C3AR1,C9ORF72,CALCRL,CAV1,CD1C,CD22,CD274,CLEC4C,CTSE,CTSL,CYBB,DDX3X,DIAPH3,DMXL2,DNAJC13,DNM1,DSE,DTX3L,EXOC3L1,FOLR3,GBP1,GBP3,GCH1,GNAS,HEXB,HGF,HLA-DMA,HLA-DMB,HLA-DRA,HPS5,HSD17B6,IDH1,IFITM3,IL15,IL4I1,IRF7,JAK2,KIAA0319,LAMP3,LHFPL2,LYZ,MARCHF1,MARCHF3,MARCHF8,MARCO,MIB1,MRC1,MSR1,NCKAP1L,OSBPL1A,PARM1,PRLR,RASGEF1B,RIN2,RPS6KC1,RUBCNL,SAMD9L,SCI…
GO:CC	intracellular vesicle	GO:0097708	FALSE	1.97E-40	39.7053	2562	744	114	78724	ANXA5,AP1S2,AP1S3,ARHGAP44,BCL2L1,BST2,BTK,C3AR1,C9ORF72,CALCRL,CAV1,CD1C,CD22,CD274,CLEC4C,CTSE,CTSL,CYBB,DDX3X,DIAPH3,DMXL2,DNAJC13,DNM1,DSE,DTX3L,EXOC3L1,FOLR3,GBP1,GBP3,GCH1,GNAS,HEXB,HGF,HLA-DMA,HLA-DMB,HLA-DRA,HPS5,HSD17B6,IDH1,IFITM3,IL15,IL4I1,IRF7,JAK2,KIAA0319,LAMP3,LHFPL2,LYZ,MARCHF1,MARCHF3,MARCHF8,MARCO,MIB1,MRC1,MSR1,NCKAP1L,OSBPL1A,PARM1,PRLR,RASGEF1B,RIN2,RPS6KC1,RUBCNL,SAMD9L,SCI…
GO:CC	nuclear lumen	GO:0031981	FALSE	5.93E-40	39.2267	5540	744	169	78724	ABCG2,ADAR,AFF1,AIM2,APOBEC3A,ARL4A,ATP10D,BCL11A,CASP1,CASP7,CCNA1,CCR2,CD180,CD274,CDK14,CEP162,CHD1,CHEK2,CLIC2,CMPK2,DDX3X,DOCK4,DTX3L,DUSP3,E2F8,EAF2,EIF2AK2,ETV7,FANCL,GCH1,GYPA,H2BC18,H4C1,HELZ2,HERC6,HHEX,HNMT,HNRNPH3,HORMAD1,IFI16,IFI35,IL15,IL1RN,IRF7,IRF9,ISG15,JAK2,KDM6A,LMO2,LYSMD1,MAP2K6,MBD4,MBNL3,MIS18BP1,MS4A1,MXI1,NASP,NFIB,NRG1,NUB1,OAS1,OAS2,OAS3,OASL,PARM1,PARP9,PAX5,PHF11,PK…
GO:CC	protein-containing complex	GO:0032991	FALSE	1.15E-36	35.938	7956	744	201	78724	ADAR,AFF1,AICDA,AIM2,AP1S2,AP1S3,ATP10D,ATP1B1,BCL11A,BCL2L1,C1QA,C1QC,C5,C9ORF72,CACNA1A,CACNA1E,CACNA2D3,CALCRL,CASP1,CAV1,CC2D2A,CCDC68,CCNA1,CD19,CD40,CDK14,CLCN1,CLIC2,COL19A1,COL4A3,CYBB,DCAF12,DDX3X,DIAPH3,DMXL1,DMXL2,DNAH8,DNAI7,DNAJC13,DNM1,DTX3L,E2F8,EAF2,EIF2S3,EIF2S3B,ENSG00000288721,EXOC3L1,FAM8A1,FANCL,FAP,FCRL5,GCH1,GLRX5,GNAS,GNB4,GNG10,GYPA,H2BC18,H4C1,HEXB,HHEX,HLA-DMA,HLA-DMB,H…
GO:CC	cytoskeleton	GO:0005856	FALSE	6.49E-36	35.1879	2474	744	106	78724	ARHGAP24,AUNIP,BCL2L1,CALB1,CASP1,CC2D2A,CCDC181,CCDC39,CCDC68,CCNA1,CD180,CD274,CD86,CEP162,CFAP54,DCAF12,DDX3X,DDX60,DIAPH3,DNAH8,DNAI7,DNM1,EML6,EPB41L3,EVI5,FGD4,FRMD3,FRMD4B,GAS2L3,GBP1,HNMT,HSPB1,IFIT5,IL1RN,JAK2,KRTAP5-1,LYST,MAP2,MAP2K6,MIB1,MX1,MX2,NAV3,NCKAP5,NEXN,ODAD4,OSBPL10,PAWR,PDLIM5,PKN2,RB1,RSPH3,SESTD1,SMC6,SMTNL1,SNCA,SPTA1,STRBP,SWAP70,TENT5C,TMOD2,TPGS2,TPPP3,TUBB6,AK5,AKT1,…
GO:CC	cell junction	GO:0030054	FALSE	2.73E-31	30.564	2401	744	98	78724	ALDH1A1,ANXA5,ARHGAP24,ARHGAP44,ATP1B1,BCAR3,BCL11A,BCL2L1,C1QA,C1QB,C1QC,C9ORF72,CACNA1A,CACNA1E,CACNA2D3,CALB1,CAV1,CD151,DIAPH3,DMXL2,DNM1,DOCK4,EPB41L3,FAP,FCGR2B,FRMD4B,GNB4,GPC4,HSPB1,IL31RA,JAK2,LAP3,MIB1,MLKL,MPP3,NEXN,NLGN1,NRG1,NSF,NTSR1,PDLIM5,PKN2,PLPP3,PNOC,PTPRO,SAMD4A,SCN9A,SGIP1,SLC1A3,SLC8A3,SLITRK4,SNCA,SPTA1,SSPN,SWAP70,SYPL1,TDRD1,TMOD2,TNFSF13B,VPS45,WDFY1,YBX3,AJAP1,AKAP5,AK…
GO:CC	cell projection	GO:0042995	FALSE	1.02E-30	29.9921	2441	744	98	78724	ABCG2,ADCY6,ALDH1A1,ARHGAP24,ARHGAP44,ATP1B1,C9ORF72,CACNA1A,CALB1,CAV1,CC2D2A,CCDC181,CCDC39,CCDC68,CCR2,CD40,CEP162,CFAP54,CYBB,DDX3X,DIAPH3,DNAH8,DNAI7,DNM1,DOCK4,EPB41L3,FAP,FCGR2B,FFAR2,FGD4,FRMD4B,GCH1,GLRX5,HSPB1,IFIT5,IL31RA,IL4I1,MAOB,MAP2,NEXN,NFIB,NLGN1,NSF,NTSR1,ODAD4,PDLIM5,PIP5K1B,PKHD1L1,PKN2,PNOC,PTPRF,PTPRO,RSPH3,SAMD4A,SCIMP,SCN9A,SDC3,SLC1A3,SLC26A8,SLC8A3,SNCA,SPTA1,STAT1,SWAP…
GO:CC	bounding membrane of organelle	GO:0098588	FALSE	5.82E-30	29.2354	2251	744	93	78724	ANXA5,AP1S2,AP1S3,BCL2L1,BST2,C1GALT1,C3AR1,CAV1,CD1C,CD274,CLEC4C,CYBB,DIAPH3,DMXL2,DNAJC13,DRAM2,DSE,DTX3L,FAM210B,GALNT5,GALNTL6,GASK1B,GBP1,GBP3,GCNT1,GCNT2,GK,GNB4,GOLPH3L,HLA-DMA,HLA-DMB,HLA-DRA,HSD17B4,HSD17B6,IFI27,IFITM3,IRF7,KIAA0319,KMO,LAMP3,LHFPL2,MAOB,MARCHF1,MARCHF3,MARCHF8,MARCO,MRC1,MSR1,NAV3,NCKAP1L,NSF,PARM1,PLPP3,RSAD2,RUBCNL,SGIP1,SLC38A9,SLC44A1,SLC45A2,SLC8A3,SLC9A9,SNCA,SY…
GO:CC	extracellular vesicle	GO:1903561	FALSE	4.63E-28	27.3341	2141	744	88	78724	ACO1,ALDH1A1,ANXA5,ATP1B1,BCAM,BLVRA,BST2,C5,CA1,CALB1,CD19,CD22,CD274,CD40,CD86,COBLL1,CPNE8,CPVL,CREB5,CTSL,DDAH1,DDX3X,DNAJC13,DNM1,EIF2S3,ENTPD2,FSTL1,GK,GNAS,GNB4,GPC4,H2BC18,H4C1,HEXB,HLA-DRA,HNMT,HSPB1,IDH1,IL1RN,LAP3,LYZ,MS4A1,MTMR11,NCKAP1L,OSBPL1A,PLSCR1,PSME2,PTPRF,PTPRO,S100A10,SEMA3C,SERPING1,SERPINI2,SLAMF1,SLC44A1,SMPDL3A,SYPL1,TMEM256,TNFSF10,TUBB6,VMO1,WARS1,AKR1C3,ARRDC4,CA6,CAP…
GO:CC	extracellular membrane-bounded organelle	GO:0065010	FALSE	4.79E-28	27.3195	2142	744	88	78724	ACO1,ALDH1A1,ANXA5,ATP1B1,BCAM,BLVRA,BST2,C5,CA1,CALB1,CD19,CD22,CD274,CD40,CD86,COBLL1,CPNE8,CPVL,CREB5,CTSL,DDAH1,DDX3X,DNAJC13,DNM1,EIF2S3,ENTPD2,FSTL1,GK,GNAS,GNB4,GPC4,H2BC18,H4C1,HEXB,HLA-DRA,HNMT,HSPB1,IDH1,IL1RN,LAP3,LYZ,MS4A1,MTMR11,NCKAP1L,OSBPL1A,PLSCR1,PSME2,PTPRF,PTPRO,S100A10,SEMA3C,SERPING1,SERPINI2,SLAMF1,SLC44A1,SMPDL3A,SYPL1,TMEM256,TNFSF10,TUBB6,VMO1,WARS1,AKR1C3,ARRDC4,CA6,CAP…
GO:CC	extracellular organelle	GO:0043230	FALSE	4.79E-28	27.3195	2142	744	88	78724	ACO1,ALDH1A1,ANXA5,ATP1B1,BCAM,BLVRA,BST2,C5,CA1,CALB1,CD19,CD22,CD274,CD40,CD86,COBLL1,CPNE8,CPVL,CREB5,CTSL,DDAH1,DDX3X,DNAJC13,DNM1,EIF2S3,ENTPD2,FSTL1,GK,GNAS,GNB4,GPC4,H2BC18,H4C1,HEXB,HLA-DRA,HNMT,HSPB1,IDH1,IL1RN,LAP3,LYZ,MS4A1,MTMR11,NCKAP1L,OSBPL1A,PLSCR1,PSME2,PTPRF,PTPRO,S100A10,SEMA3C,SERPING1,SERPINI2,SLAMF1,SLC44A1,SMPDL3A,SYPL1,TMEM256,TNFSF10,TUBB6,VMO1,WARS1,AKR1C3,ARRDC4,CA6,CAP…
GO:CC	side of membrane	GO:0098552	FALSE	4.96E-28	27.3045	746	744	54	78724	ABCG2,ANXA5,BCAM,BST2,CCR2,CCRL2,CD19,CD1C,CD22,CD274,CD40,CD86,CLEC10A,CLEC4C,CXCL10,CXCL9,FCGR2B,FCRL2,FCRL5,FCRLA,FOLR2,FOLR3,GNAS,GNB4,GNG10,GPC4,HLA-DRA,IL31RA,JAK2,LY6E,LYPD6B,MILR1,MMP17,MS4A1,NLGN1,NTSR1,OSMR,PALM2AKAP2,PRLR,SLAMF1,SPTA1,TCN2,AJAP1,AKAP5,CD1B,IL2RB,KLRD1,LY6G6C,NCAM1,NRCAM,PTPN7,ST14,STAC,TRADD
GO:CC	extracellular exosome	GO:0070062	FALSE	8.48E-28	27.0716	2111	744	87	78724	ACO1,ALDH1A1,ANXA5,ATP1B1,BCAM,BLVRA,BST2,C5,CA1,CALB1,CD19,CD22,CD274,CD40,CD86,COBLL1,CPNE8,CPVL,CREB5,CTSL,DDAH1,DDX3X,DNAJC13,DNM1,EIF2S3,ENTPD2,FSTL1,GK,GNAS,GNB4,GPC4,H2BC18,H4C1,HEXB,HLA-DRA,HNMT,HSPB1,IDH1,IL1RN,LAP3,LYZ,MS4A1,MTMR11,NCKAP1L,OSBPL1A,PLSCR1,PSME2,PTPRF,PTPRO,S100A10,SEMA3C,SERPING1,SERPINI2,SLAMF1,SLC44A1,SMPDL3A,SYPL1,TMEM256,TNFSF10,TUBB6,VMO1,WARS1,AKR1C3,CA6,CAPN5,CCL2…
GO:CC	endosome	GO:0005768	FALSE	1.35E-27	26.8684	1083	744	63	78724	AP1S2,AP1S3,ARHGAP44,BST2,C9ORF72,CALCRL,CAV1,CD1C,CD22,CD274,CTSE,CTSL,DIAPH3,DNAJC13,DTX3L,HLA-DMA,HLA-DMB,HLA-DRA,HPS5,HSD17B6,IFITM3,IL15,IRF7,JAK2,KIAA0319,LAMP3,MARCHF1,MARCHF3,MARCHF8,MRC1,OSBPL1A,PARM1,PRLR,RASGEF1B,RPS6KC1,SAMD9L,SIAH2,SIGLEC1,SLC38A9,SLC9A9,TLR7,TMEM150B,TRAK2,VPS45,WDFY1,AKAP5,ARRDC4,ATP6V0E2,CACFD1,CD1B,DGKQ,ERBB2,EXPH5,F2R,IL2RB,MYO6,PRF1,PTP4A3,RAB40B,TOM1L2,WASH6P,…
GO:CC	plasma membrane bounded cell projection	GO:0120025	FALSE	3.25E-26	25.4885	2323	744	89	78724	ABCG2,ADCY6,ALDH1A1,ARHGAP44,ATP1B1,C9ORF72,CALB1,CAV1,CC2D2A,CCDC181,CCDC39,CCDC68,CCR2,CD40,CEP162,CFAP54,CYBB,DDX3X,DNAH8,DNAI7,DOCK4,EPB41L3,FAP,FCGR2B,FGD4,FRMD4B,GCH1,GLRX5,HSPB1,IFIT5,IL31RA,IL4I1,MAOB,MAP2,NEXN,NFIB,NLGN1,NSF,NTSR1,ODAD4,PIP5K1B,PKHD1L1,PKN2,PNOC,PTPRF,PTPRO,RSPH3,SAMD4A,SCIMP,SCN9A,SDC3,SLC1A3,SLC26A8,SLC8A3,SNCA,SPTA1,STAT1,SWAP70,TRAK2,TTC21A,XRN1,AKAP5,AKT1,AMIGO1,APB…
GO:CC	cell surface	GO:0009986	FALSE	1.34E-24	23.8723	914	744	55	78724	ABCG2,ANOS1,ANXA5,BCAM,BST2,CCR2,CCRL2,CD151,CD19,CD1C,CD22,CD274,CD40,CD86,CLEC10A,CLEC4C,CLEC7A,CXCL10,CXCL9,FAP,FCGR2B,FCRL1,FCRL2,FCRL5,FCRLA,FOLR2,FOLR3,GPC4,HLA-DMA,HLA-DRA,IL31RA,LAMP3,MILR1,MRC1,MS4A1,NLGN1,NTSR1,OSMR,PRLR,S100A10,SDC3,SLAMF1,SLC1A3,TCN2,ADTRP,AJAP1,CAPN5,CD1B,F2R,IL2RB,KLRD1,LY6G6C,NCAM1,NRCAM,ST14
GO:CC	mitochondrion	GO:0005739	FALSE	2.51E-23	22.6005	1844	744	75	78724	ABCG2,ACO1,ACOT9,ADAM28,ADAR,AIM2,ALAS2,BCL2L1,CMPK2,CXORF38,FAM210B,FECH,GCH1,GK,GLRX5,GLYATL2,IDH1,IFI27,IFI6,IFIH1,IFIT3,KANK2,KMO,LACTB,LAP3,MACC1,MAOB,MRPL12,NDUFV3,NME4,NSUN3,OAS1,PARP9,PDP1,PNPLA4,PNPT1,PUS10,RSAD2,SAMD9L,SETD9,SLC44A1,SLC8A3,SNCA,SP140,STARD13,TMEM256,TRAK2,VRK2,XAF1,ZNF205,ACADVL,ACOT2,AKT1,ARL4C,DDIT4,FPGS,HINT2,HSPA1L,MAFF,MAPK9,MMAB,MRPL4,NDUFA13,NDUFB8,NME3,NR2F6,NTP…
GO:CC	Golgi apparatus	GO:0005794	FALSE	2.91E-23	22.5359	1659	744	71	78724	ACO1,AP1S2,AP1S3,BST2,C1GALT1,CAV1,CD1C,CHEK2,CTSL,DOCK4,DRAM2,DSE,FGD4,GALNT5,GALNTL6,GASK1B,GBP1,GBP3,GCNT1,GCNT2,GNAS,GOLPH3L,GPC4,HLA-DRA,IL15,LAP3,MARCHF1,MARCHF8,NLGN1,NSF,NTSR1,PARM1,PLPP3,PLSCR1,RICTOR,RSAD2,SDC3,TLR7,TRIM22,TRPM4,VPS45,WDFY1,B4GALT4,CACFD1,CAPN8,CD1B,CD247,CHST13,DHCR24,F2R,FEZ1,GAL3ST4,GALNT12,GOLGA8A,GOLGA8K,GOLGA8M,GOLGA8O,LGR6,MANEAL,MFNG,MGAT4A,MLANA,MYO6,NAA60,NCAM…
GO:CC	microtubule cytoskeleton	GO:0015630	FALSE	1.87E-22	21.7284	1436	744	65	78724	AUNIP,BCL2L1,CASP1,CCDC181,CCDC68,CCNA1,CD180,CD86,CEP162,DCAF12,DDX3X,DIAPH3,DNAH8,DNAI7,DNM1,EML6,EVI5,GAS2L3,HNMT,HSPB1,IL1RN,LYST,MAP2,MIB1,MX1,MX2,NAV3,NCKAP5,PKN2,RB1,SMC6,SMTNL1,STRBP,TENT5C,TPGS2,TPPP3,TUBB6,AK5,AKT1,AXIN1,CCNB3,CCND3,DYNC2I1,EML5,ESRRA,FEZ1,KIFC2,LRGUK,MAD2L2,NDN,NINL,NME3,OVGP1,PATJ,PHF1,PLK3,PTPN7,RASSF1,REEP2,SMAD7,TMEM250,TRIM32,TSGA10,TTC23L,WASHC1
GO:CC	external side of plasma membrane	GO:0009897	FALSE	3.74E-22	21.4267	408	744	37	78724	ABCG2,ANXA5,BCAM,CCR2,CCRL2,CD19,CD1C,CD22,CD274,CD40,CD86,CLEC10A,CLEC4C,CXCL10,CXCL9,FCGR2B,FCRL2,FCRL5,FCRLA,FOLR2,FOLR3,GPC4,IL31RA,MILR1,MS4A1,NLGN1,OSMR,PRLR,SLAMF1,TCN2,CD1B,IL2RB,KLRD1,LY6G6C,NCAM1,NRCAM,ST14
GO:CC	synapse	GO:0045202	FALSE	9.07E-22	21.0426	1665	744	69	78724	ALDH1A1,ARHGAP44,BCL11A,BCL2L1,C1QA,C1QB,C1QC,C9ORF72,CACNA1A,CACNA1E,CACNA2D3,CALB1,DIAPH3,DMXL2,DNM1,DOCK4,FCGR2B,GNB4,GPC4,IL31RA,JAK2,MIB1,NLGN1,NRG1,NSF,NTSR1,PDLIM5,PNOC,PTPRO,SAMD4A,SCN9A,SGIP1,SLC1A3,SLC8A3,SLITRK4,SNCA,SSPN,SWAP70,SYPL1,TDRD1,TMOD2,VPS45,YBX3,AKAP5,AKT1,APBA2,ATP6V0E2,CACFD1,CAPN5,CDK5R1,COL13A1,CYFIP2,DAB1,DGKQ,EEF2K,ERBB2,F2R,GPR176,GRID2IP,HNRNPUL2,MAPK9,NECTIN1,NRCAM…
GO:CC	vesicle membrane	GO:0012506	FALSE	7.19E-18	17.1434	1271	744	55	78724	ANXA5,AP1S2,AP1S3,BCL2L1,BST2,C3AR1,CAV1,CD1C,CD274,CLEC4C,CYBB,DIAPH3,DMXL2,DNAJC13,DSE,DTX3L,GBP1,HLA-DMA,HLA-DMB,HLA-DRA,HSD17B6,IFITM3,IRF7,KIAA0319,LAMP3,LHFPL2,MARCHF1,MARCHF3,MARCHF8,MARCO,MRC1,MSR1,NCKAP1L,PARM1,SGIP1,SLC38A9,SLC45A2,SLC9A9,SNCA,SNX22,SYPL1,TLR7,TMEM150B,VPS45,AKAP5,ATP6V0E2,CD1B,DGKQ,ERBB2,MLANA,MYO6,RHOF,WASH6P,WASHC1,ZFYVE28
GO:CC	plasma membrane region	GO:0098590	FALSE	1.20E-17	16.922	1332	744	56	78724	ABCG2,ATP1B1,BST2,C1QA,C1QB,C1QC,CACNA2D3,CAV1,CTSL,DIAPH3,DNM1,DRAM2,EPB41L3,FAP,GNAS,IFIT5,IL31RA,JAK2,MPP3,MS4A1,NAIP,NLGN1,NRG1,OSMR,PALM2AKAP2,PKN2,PLPP3,PNOC,PTPRO,SCIMP,SLC14A1,SLC1A3,SLC7A7,SSPN,ADTRP,AJAP1,AKAP5,CA11,CD320,COL13A1,DHRS3,DLL1,ERBB2,F2R,GRID2IP,MYO6,NECTIN1,NRCAM,PARD6B,PATJ,PDE9A,RGS9,SCN2A,SKAP1,SLC12A1,ST14
GO:CC	cytoplasmic vesicle membrane	GO:0030659	FALSE	1.87E-17	16.7286	1252	744	54	78724	ANXA5,AP1S2,AP1S3,BCL2L1,BST2,C3AR1,CAV1,CD1C,CD274,CLEC4C,CYBB,DIAPH3,DMXL2,DNAJC13,DSE,DTX3L,GBP1,HLA-DMA,HLA-DMB,HLA-DRA,HSD17B6,IFITM3,IRF7,KIAA0319,LAMP3,LHFPL2,MARCHF1,MARCHF3,MARCHF8,MARCO,MRC1,MSR1,NCKAP1L,PARM1,SGIP1,SLC38A9,SLC45A2,SLC9A9,SNCA,SNX22,SYPL1,TLR7,TMEM150B,VPS45,AKAP5,ATP6V0E2,CD1B,ERBB2,MLANA,MYO6,RHOF,WASH6P,WASHC1,ZFYVE28
GO:CC	vacuole	GO:0005773	FALSE	2.39E-17	16.6207	867	744	45	78724	AP1S2,AP1S3,BST2,C3AR1,C9ORF72,CALCRL,CD1C,CTSL,CTSV,DNAJC13,DRAM2,DTX3L,GNB4,GPC4,HEXB,HLA-DMA,HLA-DMB,HLA-DRA,IFITM3,IL4I1,LAMP3,LYZ,MARCHF1,MARCHF3,MARCHF8,NSF,RPS6KC1,RUBCNL,SDC3,SLC38A9,SNCA,TCN2,TLR7,TMEM150B,ATP6V0E2,CD1B,GNLY,GZMB,MYO6,NKG7,PRF1,TMEM79,TP53INP2,TRIM32,WASHC1
GO:CC	early endosome	GO:0005769	FALSE	3.88E-17	16.4117	438	744	33	78724	AP1S2,AP1S3,CAV1,CD22,CD274,DNAJC13,DTX3L,HLA-DRA,HPS5,HSD17B6,IFITM3,KIAA0319,LAMP3,MARCHF1,MARCHF3,MARCHF8,PARM1,RASGEF1B,RPS6KC1,SAMD9L,SIAH2,SIGLEC1,SLC9A9,TRAK2,WDFY1,ARRDC4,CACFD1,ERBB2,F2R,PTP4A3,WASH6P,WASHC1,ZFYVE28
GO:CC	perinuclear region of cytoplasm	GO:0048471	FALSE	1.44E-16	15.8406	746	744	41	78724	AANAT,BANK1,BTK,CAV1,CCR2,CYBB,EIF2AK2,GBP3,GNAS,HERC5,IFITM3,INHBB,LAMP3,MX1,OAS2,OSBPL1A,PKN2,PLSCR1,RASGRP3,SLC1A3,SLC8A3,SNCA,STAT1,TNFSF13B,TPPP3,YBX3,AXIN1,CDK5R1,CHI3L1,CYFIP2,DAB1,DOCK6,ERBB2,MYO6,PATJ,PDE9A,PER2,PTGES,RAB40B,S100B,SYNJ2
GO:CC	chromosome	GO:0005694	FALSE	1.27E-15	14.8947	2001	744	66	78724	AIM2,AUNIP,BAZ2B,BCL11A,BHLHE41,CHD1,CHEK2,CIP2A,CREB5,E2F8,ETV7,FANCL,H2BC18,H4C1,HESX1,HHEX,HORMAD1,IRF7,IRF9,JAK2,MIS18BP1,MXI1,NASP,NFIB,PARP9,PAWR,PAX5,POLK,RB1,RBBP8,SETSIP,SHOC1,SMAD1,SMC6,SMCHD1,SOX6,SP100,STAT1,STAT2,TCF4,TFEC,TRPS1,ZFX,ZNF705A,ASCL2,BAHD1,BNC2,ESRRA,H2BK1,KLHDC3,LDB1,MAD2L2,MAFF,MUS81,NFATC2,NKX3-1,NPAS2,NR1D2,NR2F6,PHF1,PLK3,SMAD7,TBX21,THAP11,WDR82,ZFPM1
GO:CC	lysosome	GO:0005764	FALSE	2.75E-15	14.5611	770	744	40	78724	AP1S2,AP1S3,BST2,C3AR1,C9ORF72,CALCRL,CD1C,CTSL,CTSV,DNAJC13,DRAM2,DTX3L,GNB4,GPC4,HEXB,HLA-DMA,HLA-DMB,HLA-DRA,IFITM3,IL4I1,LAMP3,LYZ,MARCHF1,MARCHF3,MARCHF8,NSF,RPS6KC1,SDC3,SLC38A9,SNCA,TCN2,TLR7,ATP6V0E2,CD1B,GNLY,GZMB,MYO6,NKG7,PRF1,TMEM79
GO:CC	lytic vacuole	GO:0000323	FALSE	2.75E-15	14.5611	770	744	40	78724	AP1S2,AP1S3,BST2,C3AR1,C9ORF72,CALCRL,CD1C,CTSL,CTSV,DNAJC13,DRAM2,DTX3L,GNB4,GPC4,HEXB,HLA-DMA,HLA-DMB,HLA-DRA,IFITM3,IL4I1,LAMP3,LYZ,MARCHF1,MARCHF3,MARCHF8,NSF,RPS6KC1,SDC3,SLC38A9,SNCA,TCN2,TLR7,ATP6V0E2,CD1B,GNLY,GZMB,MYO6,NKG7,PRF1,TMEM79
GO:CC	endoplasmic reticulum	GO:0005783	FALSE	1.22E-14	13.9126	2095	744	66	78724	ACO1,ANO5,ATP10D,BCL2L1,CALCRL,CAV1,CD1C,COL19A1,COL4A3,CPED1,CYBB,DHRS9,DSE,ENTPD2,FAM8A1,FSTL1,GLYATL2,HLA-DRA,HSD17B6,IFI27,IFI6,IFIT2,LACC1,MAMDC2,MARCHF1,MARCHF8,MX1,NTSR1,OAS1,OSBPL1A,PIGN,PLPP3,PNPT1,RSAD2,SERPING1,SLC8A3,SPTLC2,TLCD4,TLR7,TRPM4,TSPO2,UGT8,USP25,VRK2,CACFD1,CD320,CHI3L1,COL13A1,COL18A1,CTSW,DHCR24,DHRS3,FMN1,MANF,MGAT4A,MLANA,PAFAH2,PARP16,PDE3B,PDE9A,PDGFD,PNPLA7,PRSS23,P…
GO:CC	neuron projection	GO:0043005	FALSE	5.52E-14	13.2579	1355	744	51	78724	ADCY6,ALDH1A1,ARHGAP44,C9ORF72,CALB1,CCR2,CD40,CYBB,DOCK4,EPB41L3,FCGR2B,GCH1,GLRX5,HSPB1,IL31RA,MAOB,MAP2,NEXN,NFIB,NLGN1,NSF,NTSR1,PKHD1L1,PNOC,PTPRF,PTPRO,SAMD4A,SCN9A,SLC1A3,SLC8A3,SNCA,SPTA1,STAT1,TRAK2,XRN1,AKAP5,AMIGO1,APBA2,CDK5R1,CYFIP2,DHRS3,EEF2K,FEZ1,IMPG1,NECTIN1,NRCAM,PLK3,PTGDR2,RGS9,SCN2A,TSPOAP1
GO:CC	somatodendritic compartment	GO:0036477	FALSE	1.15E-13	12.9375	860	744	40	78724	ARHGAP44,C9ORF72,CACNA1A,CACNA1E,CALB1,CCR2,CD22,CD40,CYBB,FCGR2B,GLRX5,MAOB,MAP2,NLGN1,NSF,NTSR1,PNOC,PTPRF,PTPRO,SAMD4A,SIAH2,SLC1A3,SLC8A3,SNCA,STAT1,TRAK2,TRPM4,XRN1,AKAP5,AMIGO1,APBA2,CDK5R1,EEF2K,FEZ1,NDN,NECTIN1,PDE9A,PLK3,S100B,TBX21
GO:CC	supramolecular complex	GO:0099080	FALSE	1.85E-13	12.7322	1448	744	52	78724	AICDA,APOBEC3A,C9ORF72,CASP1,CCDC181,CEP162,COL4A3,DDX3X,DIAPH3,DNAH8,DNM1,EML6,GAS2L3,HELZ2,HSPB1,KRTAP5-1,MAP2,MX1,MX2,NAV3,NCKAP5,NEXN,PAWR,PDLIM5,SAMD4A,SMTNL1,SNCA,TDRD1,TDRD7,TMOD2,TPGS2,TPPP3,TRIM5,TUBB6,XRN1,APOBEC3H,BAG3,BFSP1,CDK5R1,EML5,FEZ1,FMN1,KIFC2,KRT73,MYBPH,MYO6,NINL,PLK3,RASSF1,REEP2,SARNP,TRIM32
GO:CC	presynapse	GO:0098793	FALSE	4.51E-13	12.3458	641	744	34	78724	ARHGAP44,BCL2L1,C1QA,C1QB,C1QC,C9ORF72,CACNA2D3,CALB1,DMXL2,DNM1,IL31RA,NLGN1,NTSR1,PDLIM5,PNOC,SCN9A,SGIP1,SLC8A3,SNCA,SYPL1,VPS45,APBA2,ATP6V0E2,CACFD1,CDK5R1,DGKQ,ERBB2,NECTIN1,RAB40B,RGS9,S1PR5,SCN2A,SYNJ2,TSPOAP1
GO:CC	organelle envelope	GO:0031967	FALSE	4.87E-13	12.312	1329	744	49	78724	ABCG2,ALAS2,BCL2L1,C9ORF72,CYBB,FAM210B,FANCL,FECH,GCH1,GK,IFI27,IFI6,KMO,MAOB,MRPL12,MX1,MX2,NAV3,NDUFV3,NME4,PHF11,PNPT1,POMZP3,RGPD2,RSAD2,SLC44A1,SLC8A3,SMAD1,STARD13,TXLNG,VRK2,ACADVL,AKT1,DUSP2,FAM169A,FPGS,HINT2,MRPL4,MYO6,NDUFA13,NDUFB8,NME3,PARP16,PPP2R2B,PTGES,RAB40B,SLC25A29,SLC25A32,SULT1E1
GO:CC	membrane protein complex	GO:0098796	FALSE	7.03E-13	12.1533	1393	744	50	78724	AP1S2,AP1S3,ATP1B1,C5,CACNA1A,CACNA1E,CACNA2D3,CALCRL,CAV1,CD40,CLCN1,CLIC2,CYBB,DIAPH3,DNM1,FAM8A1,GNAS,GNB4,GNG10,GYPA,HLA-DMA,HLA-DMB,HLA-DRA,JAK2,KCNH7,NDUFV3,OSMR,S100A10,SCN9A,SESTD1,SGIP1,SLC1A3,SLC38A9,SSPN,TRPM4,ACVR2B,AMIGO1,ATP6V0E2,CD247,CLIC3,COL13A1,ERBB2,IL2RB,KCNQ5,NDUFA13,NDUFB8,NOXA1,SCN2A,SKAP1,TRADD
GO:CC	organelle subcompartment	GO:0031984	FALSE	3.75E-12	11.4255	1562	744	52	78724	ANO5,AP1S2,AP1S3,ATP10D,CAV1,CYBB,DHRS9,DSE,ENTPD2,FAM8A1,GCNT1,GNAS,GOLPH3L,HLA-DRA,IFI27,IFI6,LAP3,MARCHF1,MARCHF8,MX1,NSF,PIGN,PLPP3,PNPT1,RSAD2,SLC8A3,SPTLC2,TLR7,TSPO2,UGT8,VRK2,B4GALT4,CACFD1,DHCR24,DHRS3,FMN1,GAL3ST4,GOLGA8A,GOLGA8K,GOLGA8M,GOLGA8O,LGR6,MGAT4A,MLANA,PAFAH2,PARP16,PLK3,PNPLA7,PTGES,REEP2,SMPD3,TMEM79
GO:CC	cell body	GO:0044297	FALSE	3.82E-12	11.4177	568	744	31	78724	C9ORF72,CACNA1A,CACNA1E,CALB1,CCR2,CD22,CD40,CYBB,FCGR2B,GLRX5,GNB4,MAOB,MAP2,NTSR1,PNOC,PTPRF,SIAH2,SLC1A3,SLC8A3,SNCA,TRPM4,XRN1,AMIGO1,CDK5R1,FEZ1,HSPA1L,NDN,PDE9A,PLK3,S100B,TBX21
GO:CC	chromatin	GO:0000785	FALSE	3.90E-12	11.4089	1404	744	49	78724	BAZ2B,BCL11A,BHLHE41,CHD1,CREB5,E2F8,ETV7,FANCL,H2BC18,H4C1,HESX1,HHEX,IRF7,IRF9,JAK2,MXI1,NASP,NFIB,PAWR,PAX5,RB1,SETSIP,SMAD1,SOX6,STAT1,STAT2,TCF4,TFEC,TRPS1,ZFX,ZNF705A,ASCL2,BNC2,ESRRA,H2BK1,KLHDC3,LDB1,MAD2L2,MAFF,NFATC2,NKX3-1,NPAS2,NR1D2,NR2F6,SMAD7,TBX21,THAP11,WDR82,ZFPM1
GO:CC	endosome membrane	GO:0010008	FALSE	7.33E-12	11.1346	582	744	31	78724	CAV1,CD1C,CD274,DIAPH3,DNAJC13,DTX3L,HLA-DMA,HLA-DMB,HLA-DRA,HSD17B6,IFITM3,IRF7,KIAA0319,LAMP3,MARCHF1,MARCHF3,MARCHF8,MRC1,PARM1,SLC38A9,SLC9A9,TLR7,TMEM150B,VPS45,AKAP5,ATP6V0E2,CD1B,ERBB2,WASH6P,WASHC1,ZFYVE28
GO:CC	external encapsulating structure	GO:0030312	FALSE	1.67E-11	10.7781	560	744	30	78724	ANOS1,ANXA5,BCAM,C1QA,C1QC,CD151,CD180,COL19A1,COL4A3,CTSL,ENTPD2,GPC4,IL7,LGALS9,MARCO,MMP17,PKHD1L1,PLSCR1,S100A10,SDC3,SERPING1,CHI3L1,CLIC3,COL13A1,COL18A1,IMPG1,LAMC3,NCAM1,OVGP1,SPON2
GO:CC	neuronal cell body	GO:0043025	FALSE	3.99E-11	10.3993	500	744	28	78724	C9ORF72,CACNA1A,CACNA1E,CALB1,CCR2,CD22,CD40,CYBB,GLRX5,MAOB,MAP2,NTSR1,PNOC,PTPRF,SIAH2,SLC1A3,SLC8A3,SNCA,TRPM4,XRN1,AMIGO1,CDK5R1,FEZ1,NDN,PDE9A,PLK3,S100B,TBX21
GO:CC	extracellular matrix	GO:0031012	FALSE	9.82E-11	10.0077	559	744	29	78724	ANOS1,ANXA5,BCAM,C1QA,C1QC,CD151,CD180,COL19A1,COL4A3,CTSL,ENTPD2,GPC4,IL7,LGALS9,MARCO,MMP17,PLSCR1,S100A10,SDC3,SERPING1,CHI3L1,CLIC3,COL13A1,COL18A1,IMPG1,LAMC3,NCAM1,OVGP1,SPON2
GO:CC	microtubule organizing center	GO:0005815	FALSE	1.92E-10	9.71672	886	744	36	78724	AUNIP,BCL2L1,CCDC68,CCNA1,CD86,CEP162,DCAF12,DDX3X,DIAPH3,EVI5,HNMT,IL1RN,MIB1,PKN2,SMTNL1,TENT5C,TPGS2,AK5,AKT1,CCNB3,CCND3,DYNC2I1,FEZ1,KIFC2,NDN,NINL,NME3,PATJ,PHF1,PLK3,RASSF1,SMAD7,TRIM32,TSGA10,TTC23L,WASHC1
GO:CC	plasma membrane protein complex	GO:0098797	FALSE	4.40E-10	9.35658	725	744	32	78724	ATP1B1,C5,CACNA1A,CACNA1E,CACNA2D3,CALCRL,CAV1,CD40,CYBB,GNAS,GNB4,GNG10,HLA-DMA,HLA-DMB,HLA-DRA,JAK2,OSMR,S100A10,SCN9A,SGIP1,SSPN,ACVR2B,AMIGO1,CD247,COL13A1,ERBB2,IL2RB,KCNQ5,NOXA1,SCN2A,SKAP1,TRADD
GO:CC	supramolecular polymer	GO:0099081	FALSE	6.87E-10	9.16283	1076	744	39	78724	CASP1,CCDC181,CEP162,COL4A3,DIAPH3,DNAH8,DNM1,EML6,GAS2L3,HSPB1,KRTAP5-1,MAP2,MX1,MX2,NAV3,NCKAP5,NEXN,PAWR,PDLIM5,SMTNL1,SNCA,TMOD2,TPGS2,TPPP3,TUBB6,BAG3,BFSP1,CDK5R1,EML5,FEZ1,FMN1,KIFC2,KRT73,MYBPH,MYO6,NINL,RASSF1,REEP2,TRIM32
GO:CC	catalytic complex	GO:1902494	FALSE	1.79E-09	8.74596	1779	744	51	78724	BCL11A,C9ORF72,CCNA1,CDK14,CYBB,DCAF12,DNAH8,DNAI7,FAM8A1,FAP,GNAS,GNB4,GNG10,HEXB,HSPB1,IFIT5,KDM6A,NDUFV3,PDP1,PHKB,PNPT1,PSME2,RB1,SMC6,SPTLC2,STRADB,UBE2L6,ACVR2B,AKAP5,ATP6V0E2,AXIN1,CCNB3,CCND3,CCNQ,CDK5R1,DDA1,DYNC2I1,FBXL18,FBXW5,KLHDC3,MAD2L2,MED27,MUS81,NDUFA13,NDUFB8,NOXA1,PARD6B,PFKFB1,PHF1,PPP2R2B,WDR82
GO:CC	supramolecular fiber	GO:0099512	FALSE	2.28E-09	8.64156	1068	744	38	78724	CASP1,CCDC181,CEP162,DIAPH3,DNAH8,DNM1,EML6,GAS2L3,HSPB1,KRTAP5-1,MAP2,MX1,MX2,NAV3,NCKAP5,NEXN,PAWR,PDLIM5,SMTNL1,SNCA,TMOD2,TPGS2,TPPP3,TUBB6,BAG3,BFSP1,CDK5R1,EML5,FEZ1,FMN1,KIFC2,KRT73,MYBPH,MYO6,NINL,RASSF1,REEP2,TRIM32
GO:CC	Golgi membrane	GO:0000139	FALSE	3.01E-09	8.52186	688	744	30	78724	AP1S2,AP1S3,C1GALT1,CAV1,DSE,GALNT5,GALNTL6,GASK1B,GBP1,GBP3,GCNT1,GCNT2,GOLPH3L,HLA-DRA,MARCHF8,PARM1,PLPP3,TLR7,VPS45,B4GALT4,CHST13,DHCR24,GALNT12,MANEAL,MFNG,MGAT4A,NAA60,NCAM1,PDGFD,SMPD3
GO:CC	anchoring junction	GO:0070161	FALSE	8.68E-09	8.0616	912	744	34	78724	ANXA5,ARHGAP24,ATP1B1,BCAR3,CAV1,CD151,EPB41L3,FAP,FRMD4B,HSPB1,JAK2,LAP3,MPP3,NEXN,PDLIM5,PKN2,PLPP3,SLC8A3,TNFSF13B,YBX3,AJAP1,AKT1,CAPN5,COL13A1,DLL1,FMN1,LLGL2,NECTIN1,PARD6B,PATJ,PHLDB2,SCN2A,SKAP1,SMAD7
GO:CC	vacuolar membrane	GO:0005774	FALSE	8.69E-09	8.06078	498	744	25	78724	AP1S2,AP1S3,BST2,C3AR1,DNAJC13,DRAM2,DTX3L,GNB4,HLA-DMA,HLA-DMB,HLA-DRA,IFITM3,LAMP3,MARCHF1,MARCHF8,NSF,RUBCNL,SLC38A9,TLR7,TMEM150B,ATP6V0E2,CD1B,MYO6,NKG7,TMEM79
GO:CC	postsynapse	GO:0098794	FALSE	1.34E-08	7.87425	779	744	31	78724	ARHGAP44,BCL11A,C1QA,C1QB,C1QC,C9ORF72,CALB1,DOCK4,FCGR2B,JAK2,MIB1,NLGN1,NSF,NTSR1,PDLIM5,PTPRO,SLC8A3,SNCA,SSPN,SWAP70,AKAP5,AKT1,APBA2,CDK5R1,COL13A1,DGKQ,EEF2K,F2R,GRID2IP,NRCAM,RGS9
GO:CC	Golgi apparatus subcompartment	GO:0098791	FALSE	1.42E-08	7.84704	389	744	22	78724	AP1S2,AP1S3,GCNT1,GNAS,GOLPH3L,HLA-DRA,LAP3,MARCHF1,NSF,PLPP3,B4GALT4,GAL3ST4,GOLGA8A,GOLGA8K,GOLGA8M,GOLGA8O,LGR6,MGAT4A,MLANA,PLK3,SMPD3,TMEM79
GO:CC	early endosome membrane	GO:0031901	FALSE	3.71E-08	7.43115	198	744	16	78724	CAV1,CD274,DNAJC13,DTX3L,HLA-DRA,HSD17B6,IFITM3,KIAA0319,LAMP3,MARCHF1,MARCHF3,MARCHF8,SLC9A9,WASH6P,WASHC1,ZFYVE28
GO:CC	lysosomal membrane	GO:0005765	FALSE	4.00E-08	7.39827	451	744	23	78724	AP1S2,AP1S3,BST2,C3AR1,DNAJC13,DRAM2,DTX3L,GNB4,HLA-DMA,HLA-DMB,HLA-DRA,IFITM3,LAMP3,MARCHF1,MARCHF8,NSF,SLC38A9,TLR7,ATP6V0E2,CD1B,MYO6,NKG7,TMEM79
GO:CC	lytic vacuole membrane	GO:0098852	FALSE	4.00E-08	7.39827	451	744	23	78724	AP1S2,AP1S3,BST2,C3AR1,DNAJC13,DRAM2,DTX3L,GNB4,HLA-DMA,HLA-DMB,HLA-DRA,IFITM3,LAMP3,MARCHF1,MARCHF8,NSF,SLC38A9,TLR7,ATP6V0E2,CD1B,MYO6,NKG7,TMEM79
GO:CC	dendrite	GO:0030425	FALSE	5.59E-08	7.25262	634	744	27	78724	ARHGAP44,C9ORF72,CALB1,CCR2,CYBB,FCGR2B,GLRX5,MAOB,MAP2,NLGN1,NSF,NTSR1,PNOC,PTPRO,SAMD4A,SLC8A3,STAT1,TRAK2,XRN1,AKAP5,AMIGO1,APBA2,CDK5R1,EEF2K,FEZ1,NECTIN1,PLK3
GO:CC	dendritic tree	GO:0097447	FALSE	5.99E-08	7.22257	636	744	27	78724	ARHGAP44,C9ORF72,CALB1,CCR2,CYBB,FCGR2B,GLRX5,MAOB,MAP2,NLGN1,NSF,NTSR1,PNOC,PTPRO,SAMD4A,SLC8A3,STAT1,TRAK2,XRN1,AKAP5,AMIGO1,APBA2,CDK5R1,EEF2K,FEZ1,NECTIN1,PLK3
GO:CC	polymeric cytoskeletal fiber	GO:0099513	FALSE	2.13E-07	6.67091	822	744	30	78724	CASP1,CCDC181,CEP162,DIAPH3,DNAH8,DNM1,EML6,GAS2L3,KRTAP5-1,MAP2,MX1,MX2,NAV3,NCKAP5,PAWR,PDLIM5,SMTNL1,TPGS2,TPPP3,TUBB6,BFSP1,EML5,FEZ1,FMN1,KIFC2,KRT73,MYO6,NINL,RASSF1,REEP2
GO:CC	membrane raft	GO:0045121	FALSE	2.52E-07	6.5985	295	744	18	78724	ABCG2,BST2,BTK,CAV1,CD19,JAK2,MS4A1,NTSR1,PLPP3,PLSCR1,S100A10,ADTRP,AKAP5,CD320,DLL1,F2R,SKAP1,SYNJ2
GO:CC	membrane microdomain	GO:0098857	FALSE	2.81E-07	6.55169	297	744	18	78724	ABCG2,BST2,BTK,CAV1,CD19,JAK2,MS4A1,NTSR1,PLPP3,PLSCR1,S100A10,ADTRP,AKAP5,CD320,DLL1,F2R,SKAP1,SYNJ2
GO:CC	secretory vesicle	GO:0099503	FALSE	2.92E-07	6.53432	1099	744	35	78724	ANXA5,BCL2L1,BST2,C3AR1,CAV1,CLEC4C,CTSL,CYBB,DDX3X,DMXL2,DNAJC13,DNM1,EXOC3L1,FOLR3,HEXB,HGF,IDH1,IL4I1,LAMP3,LHFPL2,LYZ,NCKAP1L,SERPING1,SNCA,SPATA1,SYPL1,VPS45,ATP6V0E2,CACFD1,CHI3L1,CTSW,LRGUK,RAB40B,RHOF,SELENOP
GO:CC	serine/threonine protein kinase complex	GO:1902554	FALSE	3.48E-07	6.45823	139	744	13	78724	C9ORF72,CCNA1,CDK14,IFIT5,PHKB,RB1,STRADB,ACVR2B,CCNB3,CCND3,CCNQ,CDK5R1,PARD6B
GO:CC	mitochondrial envelope	GO:0005740	FALSE	3.53E-07	6.45261	840	744	30	78724	ABCG2,ALAS2,BCL2L1,FAM210B,FECH,GK,IFI27,IFI6,KMO,MAOB,MRPL12,NDUFV3,NME4,PNPT1,RSAD2,SLC44A1,SLC8A3,STARD13,VRK2,ACADVL,AKT1,FPGS,HINT2,MRPL4,NDUFA13,NDUFB8,NME3,PPP2R2B,SLC25A29,SLC25A32
GO:CC	centrosome	GO:0005813	FALSE	4.32E-07	6.36443	746	744	28	78724	AUNIP,BCL2L1,CCNA1,CD86,CEP162,DCAF12,DDX3X,EVI5,HNMT,IL1RN,MIB1,PKN2,TENT5C,TPGS2,AK5,CCNB3,CCND3,DYNC2I1,FEZ1,NDN,NINL,PATJ,PHF1,PLK3,RASSF1,SMAD7,TRIM32,TTC23L
GO:CC	apical part of cell	GO:0045177	FALSE	5.82E-07	6.23531	474	744	22	78724	ABCG2,ATP1B1,BST2,CAV1,CTSL,DRAM2,FAP,GNAS,IFIT5,MPP3,NRG1,OSMR,PALM2AKAP2,PTPRO,AJAP1,DLL1,ERBB2,FAT4,MYO6,PARD6B,PATJ,SLC12A1
GO:CC	axon	GO:0030424	FALSE	6.04E-07	6.21869	659	744	26	78724	ALDH1A1,C9ORF72,CALB1,CD40,EPB41L3,HSPB1,IL31RA,MAP2,NEXN,NFIB,NTSR1,PNOC,PTPRO,SCN9A,SLC8A3,SNCA,SPTA1,STAT1,TRAK2,AMIGO1,CDK5R1,FEZ1,NECTIN1,NRCAM,SCN2A,TSPOAP1
GO:CC	protein kinase complex	GO:1902911	FALSE	1.13455E-06	5.94518	153	744	13	78724	C9ORF72,CCNA1,CDK14,IFIT5,PHKB,RB1,STRADB,ACVR2B,CCNB3,CCND3,CCNQ,CDK5R1,PARD6B
GO:CC	mitochondrial membrane	GO:0031966	FALSE	1.50154E-06	5.82346	790	744	28	78724	ABCG2,ALAS2,BCL2L1,FAM210B,FECH,GK,IFI27,IFI6,KMO,MAOB,MRPL12,NDUFV3,NME4,RSAD2,SLC44A1,SLC8A3,STARD13,VRK2,ACADVL,FPGS,HINT2,MRPL4,NDUFA13,NDUFB8,NME3,PPP2R2B,SLC25A29,SLC25A32
GO:CC	RNA polymerase II transcription regulator complex	GO:0090575	FALSE	1.57532E-06	5.80263	256	744	16	78724	E2F8,IRF9,MXI1,RB1,S100A10,SMAD1,STAT1,STAT2,TCF4,ASCL2,LDB1,MAFF,MED27,NFATC2,NPAS2,SMAD7
GO:CC	secretory granule	GO:0030141	FALSE	2.03023E-06	5.69246	907	744	30	78724	ANXA5,BST2,C3AR1,CAV1,CLEC4C,CTSL,CYBB,DDX3X,DMXL2,DNAJC13,DNM1,EXOC3L1,FOLR3,HEXB,HGF,IDH1,IL4I1,LAMP3,LHFPL2,LYZ,NCKAP1L,SERPING1,SNCA,SPATA1,SYPL1,CHI3L1,CTSW,LRGUK,RHOF,SELENOP
GO:CC	glutamatergic synapse	GO:0098978	FALSE	2.08643E-06	5.6806	602	744	24	78724	ARHGAP44,C1QA,C1QB,C1QC,C9ORF72,CALB1,DNM1,DOCK4,GPC4,JAK2,MIB1,NLGN1,NRG1,PTPRO,SLITRK4,AKT1,DAB1,DGKQ,EEF2K,GRID2IP,NRCAM,RGS9,SCN2A,TSPOAP1
GO:CC	nuclear envelope	GO:0005635	FALSE	3.00994E-06	5.52144	519	744	22	78724	BCL2L1,C9ORF72,CYBB,FANCL,GCH1,IFI27,MX1,MX2,NAV3,PHF11,POMZP3,RGPD2,SMAD1,TXLNG,VRK2,DUSP2,FAM169A,MYO6,PARP16,PTGES,RAB40B,SULT1E1
GO:CC	cell-cell junction	GO:0005911	FALSE	3.82406E-06	5.41748	526	744	22	78724	ARHGAP24,ATP1B1,EPB41L3,FRMD4B,MPP3,NEXN,PDLIM5,PKN2,PLPP3,YBX3,AJAP1,AKT1,COL13A1,DLL1,FMN1,LLGL2,NECTIN1,PARD6B,PATJ,SCN2A,SKAP1,SMAD7
GO:CC	collagen-containing extracellular matrix	GO:0062023	FALSE	4.59157E-06	5.33804	397	744	19	78724	ANXA5,BCAM,C1QA,C1QC,COL19A1,COL4A3,CTSL,GPC4,IL7,LGALS9,MARCO,PLSCR1,S100A10,SDC3,SERPING1,COL13A1,COL18A1,IMPG1,NCAM1
GO:CC	immunological synapse	GO:0001772	FALSE	5.12121E-06	5.29063	47	744	8	78724	CALHM6,DUSP3,HLA-DRA,IL4I1,SCIMP,GZMB,PRF1,SKAP1
GO:CC	microtubule	GO:0005874	FALSE	5.81607E-06	5.23537	492	744	21	78724	CASP1,CCDC181,CEP162,DNAH8,DNM1,EML6,GAS2L3,MAP2,MX1,MX2,NAV3,NCKAP5,TPGS2,TPPP3,TUBB6,EML5,FEZ1,KIFC2,NINL,RASSF1,REEP2
GO:CC	late endosome	GO:0005770	FALSE	6.1341E-06	5.21225	321	744	17	78724	BST2,CTSL,HLA-DMA,HLA-DMB,HLA-DRA,IFITM3,LAMP3,MARCHF1,MARCHF8,OSBPL1A,PARM1,RASGEF1B,SIGLEC1,SLC38A9,SLC9A9,F2R,WASHC1
GO:CC	nuclear outer membrane-endoplasmic reticulum membrane network	GO:0042175	FALSE	8.71509E-06	5.05973	1258	744	35	78724	ANO5,ATP10D,CAV1,CYBB,DHRS9,DSE,ENTPD2,FAM8A1,HLA-DRA,IFI27,IFI6,MARCHF1,MARCHF8,MX1,NAV3,PIGN,PLPP3,PNPT1,RSAD2,SLC8A3,SPTLC2,TLR7,TSPO2,UGT8,VRK2,CACFD1,DHCR24,DHRS3,FMN1,MLANA,PAFAH2,PARP16,PNPLA7,PTGES,REEP2
GO:CC	Golgi stack	GO:0005795	FALSE	8.99609E-06	5.04595	150	744	12	78724	GCNT1,GOLPH3L,NSF,B4GALT4,GAL3ST4,GOLGA8A,GOLGA8K,GOLGA8M,GOLGA8O,MGAT4A,PLK3,SMPD3
GO:CC	endoplasmic reticulum membrane	GO:0005789	FALSE	1.70504E-05	4.76827	1233	744	34	78724	ANO5,ATP10D,CAV1,CYBB,DHRS9,DSE,ENTPD2,FAM8A1,HLA-DRA,IFI27,IFI6,MARCHF1,MARCHF8,MX1,PIGN,PLPP3,PNPT1,RSAD2,SLC8A3,SPTLC2,TLR7,TSPO2,UGT8,VRK2,CACFD1,DHCR24,DHRS3,FMN1,MLANA,PAFAH2,PARP16,PNPLA7,PTGES,REEP2
GO:CC	cell leading edge	GO:0031252	FALSE	1.80966E-05	4.7424	433	744	19	78724	ARHGAP44,DDX3X,EPB41L3,FAP,FGD4,FRMD4B,IFIT5,PKN2,PTPRO,SCIMP,SWAP70,AKAP5,AKT1,ERBB2,LDB1,MYO6,PDE9A,PHLDB2,S100B
GO:CC	endoplasmic reticulum subcompartment	GO:0098827	FALSE	1.91157E-05	4.71861	1239	744	34	78724	ANO5,ATP10D,CAV1,CYBB,DHRS9,DSE,ENTPD2,FAM8A1,HLA-DRA,IFI27,IFI6,MARCHF1,MARCHF8,MX1,PIGN,PLPP3,PNPT1,RSAD2,SLC8A3,SPTLC2,TLR7,TSPO2,UGT8,VRK2,CACFD1,DHCR24,DHRS3,FMN1,MLANA,PAFAH2,PARP16,PNPLA7,PTGES,REEP2
GO:CC	endocytic vesicle	GO:0030139	FALSE	2.23978E-05	4.64979	351	744	17	78724	CAV1,CTSL,CYBB,DNM1,HLA-DRA,KIAA0319,MARCO,MSR1,RIN2,SCIMP,SGIP1,SLAMF1,SLC9A9,TLR7,ATP6V0E2,GNLY,MYO6
GO:CC	transferase complex	GO:1990234	FALSE	2.91691E-05	4.53508	910	744	28	78724	C9ORF72,CCNA1,CDK14,DCAF12,FAM8A1,IFIT5,KDM6A,PHKB,RB1,SMC6,SPTLC2,STRADB,UBE2L6,ACVR2B,CCNB3,CCND3,CCNQ,CDK5R1,DDA1,FBXL18,FBXW5,KLHDC3,MAD2L2,MED27,PARD6B,PFKFB1,PHF1,WDR82
GO:CC	apical plasma membrane	GO:0016324	FALSE	3.7394E-05	4.4272	408	744	18	78724	ABCG2,ATP1B1,BST2,CAV1,CTSL,DRAM2,GNAS,MPP3,NRG1,OSMR,PALM2AKAP2,PTPRO,AJAP1,DLL1,ERBB2,PARD6B,PATJ,SLC12A1
GO:CC	transporter complex	GO:1990351	FALSE	6.38387E-05	4.19492	518	744	20	78724	ATP10D,ATP1B1,CACNA1A,CACNA1E,CACNA2D3,CLCN1,CLIC2,CYBB,KCNH7,NDUFV3,SCN9A,SESTD1,TRPM4,AMIGO1,ATP6V0E2,CLIC3,KCNQ5,NDUFA13,NDUFB8,SCN2A
GO:CC	transcription regulator complex	GO:0005667	FALSE	7.43187E-05	4.1289	523	744	20	78724	E2F8,IRF9,LMO2,MXI1,RB1,RBBP8,S100A10,SMAD1,STAT1,STAT2,TCF4,ASCL2,LDB1,MAFF,MED27,NFATC2,NPAS2,PER2,SMAD7,ZFPM1
GO:CC	cilium	GO:0005929	FALSE	8.36358E-05	4.07761	789	744	25	78724	ADCY6,ATP1B1,CAV1,CC2D2A,CCDC181,CCDC39,CCDC68,CEP162,CFAP54,DNAH8,DNAI7,IL4I1,ODAD4,RSPH3,SLC26A8,TTC21A,AKT1,DHRS3,DYNC2I1,IMPG1,NME3,NMUR1,TACR2,TSGA10,TUB
GO:CC	actin cytoskeleton	GO:0015629	FALSE	0.000103147	3.98654	534	744	20	78724	CALB1,CD274,DIAPH3,GAS2L3,GBP1,IFIT5,NEXN,PAWR,PDLIM5,SMTNL1,SNCA,SPTA1,SWAP70,TMOD2,BAG3,FMN1,LLGL2,MYO6,PHLDB2,PPP1R12C
GO:CC	adherens junction	GO:0005912	FALSE	0.000113459	3.94516	189	744	12	78724	ARHGAP24,FRMD4B,MPP3,NEXN,PDLIM5,PLPP3,AJAP1,DLL1,FMN1,LLGL2,NECTIN1,SMAD7
GO:CC	transmembrane transporter complex	GO:1902495	FALSE	0.000120892	3.9176	490	744	19	78724	ATP1B1,CACNA1A,CACNA1E,CACNA2D3,CLCN1,CLIC2,CYBB,KCNH7,NDUFV3,SCN9A,SESTD1,TRPM4,AMIGO1,ATP6V0E2,CLIC3,KCNQ5,NDUFA13,NDUFB8,SCN2A
GO:CC	site of DNA damage	GO:0090734	FALSE	0.000176361	3.7536	129	744	10	78724	AIM2,AUNIP,PARP9,POLK,RBBP8,SMC6,SMCHD1,MAD2L2,NKX3-1,PHF1
GO:CC	synaptic membrane	GO:0097060	FALSE	0.00017816	3.74919	454	744	18	78724	C1QA,C1QB,C1QC,CACNA2D3,DNM1,IL31RA,NLGN1,PNOC,PTPRO,SSPN,COL13A1,ERBB2,F2R,GRID2IP,NECTIN1,NRCAM,RGS9,SCN2A
GO:CC	neuron to neuron synapse	GO:0098984	FALSE	0.000199253	3.7006	410	744	17	78724	ARHGAP44,C9ORF72,CALB1,MIB1,NLGN1,NSF,NTSR1,PDLIM5,PTPRO,SLC8A3,AKAP5,CDK5R1,EEF2K,GRID2IP,NECTIN1,NRCAM,RGS9
GO:CC	cytoplasmic side of plasma membrane	GO:0009898	FALSE	0.000216654	3.66423	165	744	11	78724	GNAS,GNB4,GNG10,JAK2,NTSR1,SPTA1,AJAP1,AKAP5,PTPN7,STAC,TRADD
GO:CC	transferase complex, transferring phosphorus-containing groups	GO:0061695	FALSE	0.000243363	3.61374	325	744	15	78724	C9ORF72,CCNA1,CDK14,IFIT5,PHKB,RB1,STRADB,ACVR2B,CCNB3,CCND3,CCNQ,CDK5R1,MAD2L2,PARD6B,PFKFB1
GO:CC	mitochondrial matrix	GO:0005759	FALSE	0.000247337	3.60671	514	744	19	78724	ACOT9,ALAS2,BCL2L1,FECH,GLRX5,MRPL12,NME4,NSUN3,PDP1,PNPT1,ACADVL,ACOT2,FPGS,HSPA1L,MMAB,MRPL4,NDUFB8,NUDT13,PYROXD2
GO:CC	ISGF3 complex	GO:0070721	FALSE	0.000309095	3.50991	3	744	3	78724	IRF9,STAT1,STAT2
GO:CC	dendritic spine	GO:0043197	FALSE	0.000484135	3.31503	179	744	11	78724	ARHGAP44,CALB1,FCGR2B,NLGN1,NTSR1,PTPRO,SLC8A3,AKAP5,APBA2,CDK5R1,EEF2K
GO:CC	spindle	GO:0005819	FALSE	0.000490863	3.30904	438	744	17	78724	AUNIP,CD180,CEP162,DIAPH3,EVI5,HSPB1,RB1,SMC6,TUBB6,AKT1,DYNC2I1,KIFC2,MAD2L2,PLK3,PTPN7,RASSF1,TTC23L
GO:CC	organelle outer membrane	GO:0031968	FALSE	0.000509373	3.29296	258	744	13	78724	BCL2L1,FAM210B,GK,IFI27,KMO,MAOB,NAV3,RSAD2,SLC44A1,SLC8A3,HINT2,NME3,PPP2R2B
GO:CC	outer membrane	GO:0019867	FALSE	0.000554915	3.25577	260	744	13	78724	BCL2L1,FAM210B,GK,IFI27,KMO,MAOB,NAV3,RSAD2,SLC44A1,SLC8A3,HINT2,NME3,PPP2R2B
GO:CC	neuron spine	GO:0044309	FALSE	0.000600933	3.22117	183	744	11	78724	ARHGAP44,CALB1,FCGR2B,NLGN1,NTSR1,PTPRO,SLC8A3,AKAP5,APBA2,CDK5R1,EEF2K
GO:CC	Golgi cisterna	GO:0031985	FALSE	0.00070223	3.15352	117	744	9	78724	GCNT1,GOLPH3L,B4GALT4,GAL3ST4,GOLGA8A,GOLGA8K,GOLGA8M,GOLGA8O,SMPD3
GO:CC	mitochondrial outer membrane	GO:0005741	FALSE	0.000785205	3.10502	227	744	12	78724	BCL2L1,FAM210B,GK,IFI27,KMO,MAOB,RSAD2,SLC44A1,SLC8A3,HINT2,NME3,PPP2R2B
GO:CC	collagen trimer	GO:0005581	FALSE	0.000960794	3.01737	91	744	8	78724	C1QA,C1QC,COL19A1,COL4A3,MARCO,MSR1,COL13A1,COL18A1
GO:CC	nuclear membrane	GO:0031965	FALSE	0.00109966	2.95874	321	744	14	78724	BCL2L1,C9ORF72,GCH1,IFI27,MX1,NAV3,PHF11,POMZP3,SMAD1,TXLNG,DUSP2,FAM169A,MYO6,SULT1E1
GO:CC	distal axon	GO:0150034	FALSE	0.00130203	2.88538	281	744	13	78724	C9ORF72,CALB1,MAP2,NTSR1,PNOC,PTPRO,SCN9A,SLC8A3,SNCA,CDK5R1,FEZ1,NECTIN1,TSPOAP1
GO:CC	cell cortex	GO:0005938	FALSE	0.00140921	2.85103	328	744	14	78724	CALB1,CAV1,EXOC3L1,SNCA,SPTA1,AKT1,AXIN1,BFSP1,LLGL2,MYO6,PARD6B,PHLDB2,TMEM250,WASHC1
GO:CC	cyclin-dependent protein kinase holoenzyme complex	GO:0000307	FALSE	0.00141554	2.84908	68	744	7	78724	CCNA1,CDK14,RB1,CCNB3,CCND3,CCNQ,CDK5R1
GO:CC	receptor complex	GO:0043235	FALSE	0.00160807	2.79369	531	744	18	78724	CALCRL,CD40,FCRL5,IL31RA,JAK2,NLGN1,OSMR,PRLR,SCIMP,TLR10,TLR7,ACVR2B,CD247,ERBB2,IL2RB,KLRD1,SKAP1,TRADD
GO:CC	Golgi cis cisterna	GO:0000137	FALSE	0.00185837	2.73087	27	744	5	78724	GOLGA8A,GOLGA8K,GOLGA8M,GOLGA8O,SMPD3
GO:CC	cytoplasmic side of membrane	GO:0098562	FALSE	0.00226046	2.6458	210	744	11	78724	GNAS,GNB4,GNG10,JAK2,NTSR1,SPTA1,AJAP1,AKAP5,PTPN7,STAC,TRADD
GO:CC	nuclear body	GO:0016604	FALSE	0.00247912	2.6057	894	744	24	78724	BCL11A,CHEK2,EAF2,FANCL,HHEX,IFI16,IL15,MBD4,PKN2,POLK,RB1,SMC6,SP100,SP140,TRIM22,ZBTB20,ZNF638,CCNB3,CLIC3,DAPK3,DGKQ,MAPK9,SARNP,TP53INP2
GO:CC	main axon	GO:0044304	FALSE	0.00250212	2.60169	74	744	7	78724	C9ORF72,CD40,EPB41L3,MAP2,SCN9A,NRCAM,SCN2A
GO:CC	cytolytic granule	GO:0044194	FALSE	0.00270094	2.56848	14	744	4	78724	GNLY,GZMB,NKG7,PRF1
GO:CC	cytoplasmic ribonucleoprotein granule	GO:0036464	FALSE	0.00290384	2.53703	258	744	12	78724	AICDA,APOBEC3A,C9ORF72,DDX3X,HELZ2,SAMD4A,TDRD1,TDRD7,TRIM5,XRN1,APOBEC3H,SARNP
GO:CC	sarcolemma	GO:0042383	FALSE	0.00364667	2.4381	143	744	9	78724	ANXA5,ATP1B1,CAV1,CLCN1,SLC8A3,SSPN,PDE9A,SCN2A,STAC
GO:CC	trans-Golgi network membrane	GO:0032588	FALSE	0.00370098	2.43168	109	744	8	78724	AP1S2,AP1S3,GNAS,GOLPH3L,HLA-DRA,MARCHF1,LGR6,TMEM79
GO:CC	basal part of cell	GO:0045178	FALSE	0.00387023	2.41226	311	744	13	78724	ATP1B1,CAV1,FAP,NAIP,PLPP3,SLC14A1,SLC1A3,SLC7A7,AJAP1,CA11,ERBB2,PHLDB2,ST14
GO:CC	trans-Golgi network	GO:0005802	FALSE	0.00425042	2.37157	268	744	12	78724	AP1S2,AP1S3,GCNT1,GNAS,GOLPH3L,HLA-DRA,LAP3,MARCHF1,PLPP3,LGR6,MLANA,TMEM79
GO:CC	organelle inner membrane	GO:0019866	FALSE	0.00428654	2.36789	571	744	18	78724	ALAS2,BCL2L1,FECH,IFI27,IFI6,MRPL12,NDUFV3,NME4,RSAD2,SMAD1,ACADVL,FAM169A,FPGS,MRPL4,NDUFA13,NDUFB8,SLC25A29,SLC25A32
GO:CC	monoatomic ion channel complex	GO:0034702	FALSE	0.00429915	2.36662	362	744	14	78724	CACNA1A,CACNA1E,CACNA2D3,CLCN1,CLIC2,CYBB,KCNH7,SCN9A,SESTD1,TRPM4,AMIGO1,CLIC3,KCNQ5,SCN2A
GO:CC	presynaptic membrane	GO:0042734	FALSE	0.00519657	2.28428	188	744	10	78724	C1QA,C1QB,C1QC,CACNA2D3,DNM1,IL31RA,ERBB2,NECTIN1,RGS9,SCN2A
GO:CC	ribonucleoprotein granule	GO:0035770	FALSE	0.0059003	2.22913	277	744	12	78724	AICDA,APOBEC3A,C9ORF72,DDX3X,HELZ2,SAMD4A,TDRD1,TDRD7,TRIM5,XRN1,APOBEC3H,SARNP
GO:CC	canonical inflammasome complex	GO:0061702	FALSE	0.0080119	2.09626	18	744	4	78724	AIM2,CASP1,DDX3X,NAIP
KEGG	Metabolic pathways	KEGG:01100	FALSE	2.05E-30	29.6888	1537	744	77	78724	AANAT,ACO1,ADCY6,ALAS2,ALDH1A1,BLVRA,C1GALT1,CA1,CMPK2,DHRS9,DSE,ENTPD2,FECH,FGGY,GALNT5,GALNTL6,GCH1,GCNT1,GCNT2,GK,HEXB,HNMT,HSD17B4,HSD17B6,IDH1,IL4I1,KMO,LACC1,LAP3,MAOB,MGAM2,NDUFV3,NME4,NT5C2,OPLAH,PIGN,PIP5K1B,PLPP3,PNPLA4,SAT1,SDSL,SPTLC2,UGT8,ACADVL,ACOT2,AK5,AKR1C3,ATP6V0E2,B4GALT4,CA6,CARNS1,CBS,CDO1,DGKK,DGKQ,DHCR24,DHRS3,EPHX2,FPGS,GALNT12,MGAT4A,MMAB,NDUFA13,NDUFB8,NME3,NTPCR,NUDT13…
KEGG	Measles	KEGG:05162	FALSE	2.58E-21	20.588	138	744	24	78724	ADAR,BCL2L1,EIF2AK1,EIF2AK2,FCGR2B,IFIH1,IL2,IRF7,IRF9,MX1,MX2,OAS1,OAS2,OAS3,SLAMF1,STAT1,STAT2,TLR7,AKT1,CCND3,HSPA1L,IL2RB,MAPK9,TRADD
KEGG	Epstein-Barr virus infection	KEGG:05169	FALSE	6.79E-20	19.1681	198	744	26	78724	BLNK,BTK,CCNA1,CD19,CD40,CXCL10,EIF2AK2,HLA-DMA,HLA-DMB,HLA-DRA,IRF7,IRF9,ISG15,MAP2K6,OAS1,OAS2,OAS3,POLK,RB1,STAT1,STAT2,AKT1,CCND3,CD247,MAPK9,TRADD
KEGG	Influenza A	KEGG:05164	FALSE	2.87E-19	18.5424	167	744	24	78724	ADAR,CASP1,CXCL10,EIF2AK2,HLA-DMA,HLA-DMB,HLA-DRA,IFIH1,IRF7,IRF9,JAK2,MX1,MX2,OAS1,OAS2,OAS3,RSAD2,STAT1,STAT2,TLR7,TNFSF10,AKT1,CCND3,TRADD
KEGG	Coronavirus disease - COVID-19	KEGG:05171	FALSE	8.08E-15	14.0926	231	744	23	78724	ADAR,C1QA,C1QB,C1QC,C3AR1,C5,CASP1,CXCL10,CYBB,EIF2AK2,IFIH1,IL2,IRF9,ISG15,MX1,MX2,OAS1,OAS2,OAS3,STAT1,STAT2,TLR7,MAPK9
KEGG	Pathways in cancer	KEGG:05200	FALSE	1.76E-14	13.7545	527	744	32	78724	ADCY6,BCL2L1,CASP7,CCNA1,COL4A3,GNAS,GNB4,GNG10,HGF,IL15,IL2,IL7,JAK2,POLK,RASGRP3,RB1,STAT1,STAT2,WNT10A,WNT16,AKT1,AXIN1,CCND3,DAPK3,DLL1,ERBB2,F2R,IL2RB,LAMC3,MAPK9,NKX3-1,RASSF1
KEGG	Human papillomavirus infection	KEGG:05165	FALSE	2.52E-14	13.5993	330	744	26	78724	CCNA1,COL4A3,CREB5,EIF2AK2,GNAS,IRF9,ISG15,MX1,MX2,OASL,RB1,STAT1,STAT2,WNT10A,WNT16,AKT1,ATP6V0E2,AXIN1,CCND3,LAMC3,LLGL2,MFNG,PARD6B,PATJ,PPP2R2B,TRADD
KEGG	Hepatitis C	KEGG:05160	FALSE	1.68E-12	11.7744	158	744	18	78724	CXCL10,EIF2AK1,EIF2AK2,IFIT1,IRF7,IRF9,MX1,MX2,OAS1,OAS2,OAS3,RB1,RSAD2,STAT1,STAT2,AKT1,PPP2R2B,TRADD
KEGG	Graft-versus-host disease	KEGG:05332	FALSE	3.09E-12	11.5096	37	744	11	78724	CD86,HLA-DMA,HLA-DMB,HLA-DRA,IL2,GZMB,KIR2DL1,KIR3DL1,KIR3DL2,KLRD1,PRF1
KEGG	Transcriptional misregulation in cancer	KEGG:05202	FALSE	5.01E-11	10.3003	192	744	18	78724	AFF1,BCL2L1,CCNA1,CD40,CD86,CDK14,ETV7,HHEX,KDM6A,LMO2,PAX5,POLK,SMAD1,WNT16,GZMB,IL2RB,LDB1,PER2
KEGG	Herpes simplex virus 1 infection	KEGG:05168	FALSE	8.36E-11	10.078	506	744	27	78724	BCL2L1,BST2,C5,EIF2AK1,EIF2AK2,HLA-DMA,HLA-DMB,HLA-DRA,IFIH1,IRF7,IRF9,JAK2,OAS1,OAS2,OAS3,SP100,STAT1,STAT2,ZNF205,ZNF354A,ZNF705A,ZNF860,AKT1,NECTIN1,TRADD,ZNF208,ZNF212
KEGG	PI3K-Akt signaling pathway	KEGG:04151	FALSE	8.44E-11	10.0739	356	744	23	78724	BCL2L1,CD19,COL4A3,CREB5,GNB4,GNG10,HGF,IL2,IL7,JAK2,OSMR,PIK3AP1,PKN2,PRLR,AKT1,CCND3,DDIT4,ERBB2,F2R,IL2RB,LAMC3,PDGFD,PPP2R2B
KEGG	Cytokine-cytokine receptor interaction	KEGG:04060	FALSE	1.00E-10	10.0001	291	744	21	78724	CCR2,CD40,CXCL10,CXCL9,IFNE,IL15,IL1RN,IL2,IL31RA,IL7,INHBB,OSMR,PRLR,TNFSF10,TNFSF13B,TNFSF15,ACVR2B,CCL28,CCL3L3,GDF9,IL2RB
KEGG	NOD-like receptor signaling pathway	KEGG:04621	FALSE	2.34E-10	9.63095	182	744	17	78724	AIM2,BCL2L1,CASP1,CYBB,GBP1,GBP3,IFI16,IRF7,IRF9,NAIP,OAS1,OAS2,OAS3,PKN2,STAT1,STAT2,MAPK9
KEGG	Intestinal immune network for IgA production	KEGG:04672	FALSE	9.01E-10	9.04535	44	744	10	78724	AICDA,CD40,CD86,HLA-DMA,HLA-DMB,HLA-DRA,IL15,IL2,TNFSF13B,CCL28
KEGG	Cell adhesion molecules	KEGG:04514	FALSE	2.25E-09	8.64797	153	744	15	78724	CD22,CD274,CD40,CD86,HLA-DMA,HLA-DMB,HLA-DRA,NLGN1,PTPRF,SDC3,SIGLEC1,SLITRK4,NCAM1,NECTIN1,NRCAM
KEGG	Toll-like receptor signaling pathway	KEGG:04620	FALSE	2.79E-09	8.55477	106	744	13	78724	CD40,CD86,CXCL10,CXCL9,IRF7,IRF9,MAP2K6,STAT1,STAT2,TLR7,AKT1,CCL3L3,MAPK9
KEGG	Human T-cell leukemia virus 1 infection	KEGG:05166	FALSE	4.19E-09	8.37819	218	744	17	78724	ADCY6,BCL2L1,CCNA1,CD40,CHEK2,CREB5,HLA-DMA,HLA-DMB,HLA-DRA,IL15,IL2,RB1,AKT1,CCND3,IL2RB,MAPK9,NFATC2
KEGG	JAK-STAT signaling pathway	KEGG:04630	FALSE	5.11E-09	8.29193	162	744	15	78724	BCL2L1,IFNE,IL15,IL2,IL31RA,IL7,IRF9,JAK2,OSMR,PRLR,STAT1,STAT2,AKT1,CCND3,IL2RB
KEGG	Th1 and Th2 cell differentiation	KEGG:04658	FALSE	5.15E-09	8.28815	89	744	12	78724	HLA-DMA,HLA-DMB,HLA-DRA,IL2,JAK2,STAT1,CD247,DLL1,IL2RB,MAPK9,NFATC2,TBX21
KEGG	Human immunodeficiency virus 1 infection	KEGG:05170	FALSE	2.19E-08	7.66022	210	744	16	78724	AP1S2,AP1S3,APOBEC3A,BCL2L1,BST2,GNB4,GNG10,MAP2K6,TRIM5,AKT1,APOBEC3H,CCNB3,CD247,MAPK9,NFATC2,TRADD
KEGG	B cell receptor signaling pathway	KEGG:04662	FALSE	3.01E-08	7.52132	81	744	11	78724	BANK1,BLNK,BTK,CD19,CD22,DAPP1,FCGR2B,PIK3AP1,RASGRP3,AKT1,NFATC2
KEGG	Toxoplasmosis	KEGG:05145	FALSE	5.14E-08	7.28908	108	744	12	78724	BCL2L1,CD40,HLA-DMA,HLA-DMB,HLA-DRA,JAK2,MAP2K6,STAT1,AKT1,HSPA1L,LAMC3,MAPK9
KEGG	Kaposi sarcoma-associated herpesvirus infection	KEGG:05167	FALSE	6.47E-08	7.18919	194	744	15	78724	CD86,EIF2AK2,GNB4,GNG10,IRF7,IRF9,JAK2,MAP2K6,RB1,STAT1,STAT2,AKT1,MAPK9,NFATC2,TRADD
KEGG	Allograft rejection	KEGG:05330	FALSE	8.12E-08	7.09059	34	744	8	78724	CD40,CD86,HLA-DMA,HLA-DMB,HLA-DRA,IL2,GZMB,PRF1
KEGG	Antigen processing and presentation	KEGG:04612	FALSE	9.98E-08	7.00067	69	744	10	78724	CTSL,HLA-DMA,HLA-DMB,HLA-DRA,PSME2,HSPA1L,KIR2DL1,KIR3DL1,KIR3DL2,KLRD1
KEGG	Lipid and atherosclerosis	KEGG:05417	FALSE	2.50E-07	6.60232	214	744	15	78724	BCL2L1,CASP1,CASP7,CD40,CYBB,IRF7,JAK2,MAP2K6,MIB1,TNFSF10,AKT1,CCL3L3,HSPA1L,MAPK9,NFATC2
KEGG	Th17 cell differentiation	KEGG:04659	FALSE	5.04E-07	6.29749	105	744	11	78724	HLA-DMA,HLA-DMB,HLA-DRA,IL2,JAK2,STAT1,CD247,IL2RB,MAPK9,NFATC2,TBX21
KEGG	Systemic lupus erythematosus	KEGG:05322	FALSE	5.23E-07	6.28111	132	744	12	78724	C1QA,C1QB,C1QC,C5,CD40,CD86,H2BC18,H4C1,HLA-DMA,HLA-DMB,HLA-DRA,H2BK1
KEGG	Hepatitis B	KEGG:05161	FALSE	5.60E-07	6.25155	162	744	13	78724	CCNA1,CREB5,DDX3X,IFIH1,IRF7,JAK2,MAP2K6,RB1,STAT1,STAT2,AKT1,MAPK9,NFATC2
KEGG	MAPK signaling pathway	KEGG:04010	FALSE	5.85E-07	6.23261	301	744	17	78724	CACNA1A,CACNA1E,CACNA2D3,DUSP3,HGF,HSPB1,MAP2K6,MAP3K20,RASGRP3,AKT1,DUSP2,ERBB2,HSPA1L,MAPK9,PDGFD,PTPN7,TRADD
KEGG	Apoptosis	KEGG:04210	FALSE	6.76E-07	6.17005	135	744	12	78724	BCL2L1,CASP7,CTSL,CTSV,SPTA1,TNFSF10,AKT1,CTSW,GZMB,MAPK9,PRF1,TRADD
KEGG	Staphylococcus aureus infection	KEGG:05150	FALSE	9.00E-07	6.04567	86	744	10	78724	C1QA,C1QB,C1QC,C3AR1,C5,FCGR2B,FPR3,HLA-DMA,HLA-DMB,HLA-DRA
KEGG	Hematopoietic cell lineage	KEGG:04640	FALSE	1.74229E-06	5.75888	92	744	10	78724	CD19,CD1C,CD22,GYPA,HLA-DMA,HLA-DMB,HLA-DRA,IL7,MS4A1,CD1B
KEGG	Phagosome	KEGG:04145	FALSE	1.76774E-06	5.75258	147	744	12	78724	CLEC7A,CTSL,CYBB,FCGR2B,HLA-DMA,HLA-DMB,HLA-DRA,MARCO,MRC1,MSR1,TUBB6,ATP6V0E2
KEGG	Autoimmune thyroid disease	KEGG:05320	FALSE	1.77969E-06	5.74966	49	744	8	78724	CD40,CD86,HLA-DMA,HLA-DMB,HLA-DRA,IL2,GZMB,PRF1
KEGG	RIG-I-like receptor signaling pathway	KEGG:04622	FALSE	2.29417E-06	5.63937	71	744	9	78724	ADAR,CXCL10,DDX3X,IFIH1,IFNE,IRF7,ISG15,MAPK9,TRADD
KEGG	Biosynthesis of cofactors	KEGG:01240	FALSE	2.76465E-06	5.55836	153	744	12	78724	ALAS2,CMPK2,FECH,GCH1,HSD17B6,KMO,NME4,AK5,DHRS3,FPGS,MMAB,NME3
KEGG	Necroptosis	KEGG:04217	FALSE	3.95242E-06	5.40314	158	744	12	78724	CASP1,CYBB,EIF2AK2,IRF9,JAK2,MLKL,STAT1,STAT2,TNFSF10,ZBP1,MAPK9,TRADD
KEGG	Chagas disease	KEGG:05142	FALSE	4.30166E-06	5.36636	101	744	10	78724	C1QA,C1QB,C1QC,GNAS,IL2,AKT1,CCL3L3,CD247,MAPK9,PPP2R2B
KEGG	C-type lectin receptor signaling pathway	KEGG:04625	FALSE	5.69747E-06	5.24432	104	744	10	78724	CASP1,CLEC7A,IL2,IRF9,STAT1,STAT2,AKT1,MAPK9,NFATC2,PLK3
KEGG	Viral carcinogenesis	KEGG:05203	FALSE	7.29592E-06	5.13692	201	744	13	78724	CCNA1,CREB5,DDX3X,EIF2AK2,H2BC18,H4C1,IRF7,IRF9,RB1,SP100,CCND3,H2BK1,TRADD
KEGG	Cytosolic DNA-sensing pathway	KEGG:04623	FALSE	8.23116E-06	5.08454	82	744	9	78724	ADAR,AIM2,CASP1,CASP7,CXCL10,IFI16,IRF7,MLKL,ZBP1
KEGG	Type I diabetes mellitus	KEGG:04940	FALSE	8.43294E-06	5.07402	40	744	7	78724	CD86,HLA-DMA,HLA-DMB,HLA-DRA,IL2,GZMB,PRF1
KEGG	Tuberculosis	KEGG:05152	FALSE	1.21535E-05	4.9153	175	744	12	78724	CLEC7A,FCGR2B,HLA-DMA,HLA-DMB,HLA-DRA,JAK2,MRC1,STAT1,AKT1,MAPK9,PLK3,TRADD
KEGG	Salmonella infection	KEGG:05132	FALSE	1.3219E-05	4.8788	249	744	14	78724	CASP1,CASP7,MAP2K6,MLKL,NAIP,NCKAP1L,S100A10,TNFSF10,TUBB6,AKT1,CYFIP2,MAPK9,MYO6,TRADD
KEGG	Viral myocarditis	KEGG:05416	FALSE	1.36055E-05	4.86629	63	744	8	78724	CAV1,CD40,CD86,HLA-DMA,HLA-DMB,HLA-DRA,SSPN,PRF1
KEGG	Rheumatoid arthritis	KEGG:05323	FALSE	1.52601E-05	4.81644	88	744	9	78724	CD86,CTSL,HLA-DMA,HLA-DMB,HLA-DRA,IL15,TNFSF13B,ATP6V0E2,CCL3L3
KEGG	Chemokine signaling pathway	KEGG:04062	FALSE	2.95842E-05	4.52894	190	744	12	78724	ADCY6,CCR2,CXCL10,CXCL9,GNB4,GNG10,JAK2,STAT1,STAT2,AKT1,CCL28,CCL3L3
KEGG	Natural killer cell mediated cytotoxicity	KEGG:04650	FALSE	3.0077E-05	4.52176	124	744	10	78724	TNFSF10,CD247,GZMB,KIR2DL1,KIR3DL1,KIR3DL2,KLRD1,NFATC2,PRF1,SH2D1B
KEGG	Hippo signaling pathway	KEGG:04390	FALSE	3.24913E-05	4.48823	157	744	11	78724	SMAD1,WNT10A,WNT16,AXIN1,CCND3,LLGL2,PARD6B,PATJ,PPP2R2B,RASSF1,SMAD7
KEGG	Purine metabolism	KEGG:00230	FALSE	3.49157E-05	4.45698	126	744	10	78724	ADCY6,ENTPD2,LACC1,NME4,NT5C2,AK5,NME3,NTPCR,PDE3B,PDE9A
KEGG	Prion disease	KEGG:05020	FALSE	3.68915E-05	4.43307	271	744	14	78724	C1QA,C1QB,C1QC,C5,CAV1,CREB5,CYBB,NDUFV3,TUBB6,HSPA1L,MAPK9,NCAM1,NDUFA13,NDUFB8
KEGG	Lysosome	KEGG:04142	FALSE	5.01087E-05	4.30009	131	744	10	78724	AP1S2,AP1S3,CTSE,CTSL,CTSV,DMXL1,DMXL2,HEXB,LAMP3,CTSW
KEGG	Osteoclast differentiation	KEGG:04380	FALSE	5.376E-05	4.26954	132	744	10	78724	BLNK,BTK,FCGR2B,IRF9,MAP2K6,STAT1,STAT2,AKT1,MAPK9,NFATC2
KEGG	Focal adhesion	KEGG:04510	FALSE	5.68862E-05	4.24499	202	744	12	78724	CAV1,COL4A3,EMP1,HGF,PIP5K1B,AKT1,CCND3,ERBB2,LAMC3,MAPK9,PDGFD,PPP1R12C
KEGG	Pertussis	KEGG:05133	FALSE	5.94687E-05	4.22571	76	744	8	78724	C1QA,C1QB,C1QC,C5,CASP1,CASP7,SERPING1,MAPK9
KEGG	Alcoholic liver disease	KEGG:04936	FALSE	0.000105166	3.97813	142	744	10	78724	C1QA,C1QB,C1QC,C3AR1,C5,MAP2K6,ACADVL,AKT1,MAPK9,TRADD
KEGG	Nucleotide metabolism	KEGG:01232	FALSE	0.000128673	3.89051	84	744	8	78724	CMPK2,ENTPD2,LACC1,NME4,NT5C2,AK5,NME3,NTPCR
KEGG	TNF signaling pathway	KEGG:04668	FALSE	0.000129322	3.88833	113	744	9	78724	CASP7,CREB5,CXCL10,IL15,MAP2K6,MLKL,AKT1,MAPK9,TRADD
KEGG	Phospholipase D signaling pathway	KEGG:04072	FALSE	0.000144125	3.84126	147	744	10	78724	ADCY6,DNM1,GNAS,PIP5K1B,PLPP3,AKT1,DGKK,DGKQ,F2R,PDGFD
KEGG	Complement and coagulation cascades	KEGG:04610	FALSE	0.000154038	3.81237	86	744	8	78724	C1QA,C1QB,C1QC,C3AR1,C5,SERPINB2,SERPING1,F2R
KEGG	Viral life cycle - HIV-1	KEGG:03250	FALSE	0.000185809	3.73093	62	744	7	78724	APOBEC3A,BST2,MX1,MX2,TRIM5,APOBEC3H,FEZ1
KEGG	Efferocytosis	KEGG:04148	FALSE	0.000246521	3.60815	156	744	10	78724	ANO5,C1QA,C1QB,C1QC,CASP1,CASP7,JAK2,XKR9,DUSP2,NFATC2
KEGG	Pathogenic Escherichia coli infection	KEGG:05130	FALSE	0.000302425	3.51938	197	744	11	78724	CASP1,CASP7,NAIP,NCKAP1L,TNFSF10,TUBB6,CYFIP2,F2R,MAPK9,MYO6,TRADD
KEGG	Pathways of neurodegeneration - multiple diseases	KEGG:05022	FALSE	0.000347167	3.45946	474	744	17	78724	BCL2L1,C9ORF72,CASP7,CYBB,DNAH8,MAP2K6,NDUFV3,SNCA,TUBB6,UBE2L6,WNT10A,WNT16,AXIN1,CDK5R1,MAPK9,NDUFA13,NDUFB8
KEGG	Viral protein interaction with cytokine and cytokine receptor	KEGG:04061	FALSE	0.000413654	3.38336	98	744	8	78724	CCR2,CXCL10,CXCL9,IL2,TNFSF10,CCL28,CCL3L3,IL2RB
KEGG	Choline metabolism in cancer	KEGG:05231	FALSE	0.000413654	3.38336	98	744	8	78724	PIP5K1B,PLPP3,SLC44A1,AKT1,DGKK,DGKQ,MAPK9,PDGFD
KEGG	Dopaminergic synapse	KEGG:04728	FALSE	0.00044054	3.35602	131	744	9	78724	CACNA1A,CREB5,GNAS,GNB4,GNG10,MAOB,AKT1,MAPK9,PPP2R2B
KEGG	Calcium signaling pathway	KEGG:04020	FALSE	0.000541916	3.26607	251	744	12	78724	CACNA1A,CACNA1E,GNAS,HGF,NTSR1,PHKB,SLC8A3,ERBB2,F2R,NFATC2,PDGFD,TACR2
KEGG	Rap1 signaling pathway	KEGG:04015	FALSE	0.000556926	3.2542	210	744	11	78724	ADCY6,DOCK4,GNAS,HGF,MAP2K6,RASGRP3,AKT1,F2R,PARD6B,PDGFD,SKAP1
KEGG	Yersinia infection	KEGG:05135	FALSE	0.000598187	3.22316	136	744	9	78724	CASP1,IL2,MAP2K6,PIP5K1B,PKN2,AKT1,ARHGEF28,MAPK9,NFATC2
KEGG	Pancreatic cancer	KEGG:05212	FALSE	0.000736787	3.13266	76	744	7	78724	BCL2L1,POLK,RB1,STAT1,AKT1,ERBB2,MAPK9
KEGG	Signaling pathways regulating pluripotency of stem cells	KEGG:04550	FALSE	0.000898456	3.0465	143	744	9	78724	HESX1,INHBB,JAK2,SMAD1,WNT10A,WNT16,ACVR2B,AKT1,AXIN1
KEGG	EGFR tyrosine kinase inhibitor resistance	KEGG:01521	FALSE	0.00095333	3.02076	79	744	7	78724	BCL2L1,HGF,JAK2,NRG1,AKT1,ERBB2,PDGFD
KEGG	Human cytomegalovirus infection	KEGG:05163	FALSE	0.000981191	3.00825	223	744	11	78724	ADCY6,CREB5,GNAS,GNB4,GNG10,MAP2K6,RB1,AKT1,CCL3L3,NFATC2,TRADD
KEGG	Endocrine and other factor-regulated calcium reabsorption	KEGG:04961	FALSE	0.000995358	3.00202	53	744	6	78724	ADCY6,ATP1B1,CALB1,DNM1,GNAS,SLC8A3
KEGG	Neuroactive ligand-receptor interaction	KEGG:04080	FALSE	0.00116117	2.9351	365	744	14	78724	C3AR1,C5,CALCRL,FPR3,LYPD6B,NTSR1,PNOC,PRLR,F2R,GNRHR,NMUR1,PTGDR,S1PR5,TACR2
KEGG	Cholinergic synapse	KEGG:04725	FALSE	0.00118829	2.92508	113	744	8	78724	ADCY6,CACNA1A,CREB5,GNB4,GNG10,JAK2,AKT1,KCNQ5
KEGG	Neutrophil extracellular trap formation	KEGG:04613	FALSE	0.00128031	2.89268	188	744	10	78724	C5,CASP1,CLEC7A,CYBB,FPR3,H2BC18,H4C1,TLR7,AKT1,H2BK1
KEGG	Circadian rhythm	KEGG:04710	FALSE	0.00149416	2.8256	34	744	5	78724	BHLHE41,NPAS2,NR1D2,PER2,PER3
KEGG	mTOR signaling pathway	KEGG:04150	FALSE	0.00171311	2.76621	155	744	9	78724	RICTOR,SLC38A9,STRADB,WNT10A,WNT16,AKT1,DDIT4,PRR5,PRR5L
KEGG	Growth hormone synthesis, secretion and action	KEGG:04935	FALSE	0.00184167	2.73479	120	744	8	78724	ADCY6,CREB5,GNAS,JAK2,MAP2K6,STAT1,AKT1,MAPK9
KEGG	Alzheimer disease	KEGG:05010	FALSE	0.00191978	2.71675	382	744	14	78724	CASP7,CYBB,EIF2AK2,NDUFV3,SNCA,TUBB6,WNT10A,WNT16,AKT1,AXIN1,CDK5R1,MAPK9,NDUFA13,NDUFB8
KEGG	Mucin type O-glycan biosynthesis	KEGG:00512	FALSE	0.001993	2.70049	36	744	5	78724	C1GALT1,GALNT5,GALNTL6,GCNT1,GALNT12
KEGG	PD-L1 expression and PD-1 checkpoint pathway in cancer	KEGG:05235	FALSE	0.00208878	2.68011	89	744	7	78724	CD274,JAK2,MAP2K6,STAT1,AKT1,CD247,NFATC2
KEGG	GABAergic synapse	KEGG:04727	FALSE	0.00208878	2.68011	89	744	7	78724	ADCY6,CACNA1A,GNB4,GNG10,NSF,SLC38A5,TRAK2
KEGG	Primary immunodeficiency	KEGG:05340	FALSE	0.0022865	2.64083	37	744	5	78724	AICDA,BLNK,BTK,CD19,CD40
KEGG	Inflammatory bowel disease	KEGG:05321	FALSE	0.00248016	2.60552	62	744	6	78724	HLA-DMA,HLA-DMB,HLA-DRA,IL2,STAT1,TBX21
KEGG	Relaxin signaling pathway	KEGG:04926	FALSE	0.0031018	2.50839	129	744	8	78724	ADCY6,COL4A3,CREB5,GNAS,GNB4,GNG10,AKT1,MAPK9
KEGG	Endocrine resistance	KEGG:01522	FALSE	0.00319021	2.49618	95	744	7	78724	ADCY6,GNAS,RB1,AKT1,DLL1,ERBB2,MAPK9
KEGG	Chemical carcinogenesis - receptor activation	KEGG:05207	FALSE	0.00343828	2.46366	211	744	10	78724	ADCY6,CACNA1A,CREB5,GNAS,JAK2,RB1,AKT1,CCND3,DLL1,EPHX2
KEGG	Tight junction	KEGG:04530	FALSE	0.00354643	2.45021	170	744	9	78724	CD1C,YBX3,CD1B,ERBB2,LLGL2,MAPK9,PARD6B,PATJ,PPP2R2B
KEGG	Progesterone-mediated oocyte maturation	KEGG:04914	FALSE	0.00503659	2.29786	102	744	7	78724	ADCY6,CCNA1,AKT1,CCNB3,MAD2L2,MAPK9,PDE3B
KEGG	Protein digestion and absorption	KEGG:04974	FALSE	0.00536011	2.27083	103	744	7	78724	ATP1B1,COL19A1,COL4A3,SLC7A7,SLC8A3,COL13A1,COL18A1
KEGG	Leishmaniasis	KEGG:05140	FALSE	0.0058195	2.23511	72	744	6	78724	CYBB,HLA-DMA,HLA-DMB,HLA-DRA,JAK2,STAT1
KEGG	Non-small cell lung cancer	KEGG:05223	FALSE	0.0058195	2.23511	72	744	6	78724	HGF,POLK,RB1,AKT1,ERBB2,RASSF1
KEGG	Alcoholism	KEGG:05034	FALSE	0.00740538	2.13045	187	744	9	78724	CREB5,GNAS,GNB4,GNG10,H2BC18,H4C1,MAOB,CAMKK1,H2BK1
KEGG	Other types of O-glycan biosynthesis	KEGG:00514	FALSE	0.00744324	2.12824	47	744	5	78724	C1GALT1,GALNT5,GALNTL6,GALNT12,MFNG
KEGG	Breast cancer	KEGG:05224	FALSE	0.00781719	2.10695	147	744	8	78724	POLK,RB1,WNT10A,WNT16,AKT1,AXIN1,DLL1,ERBB2
KEGG	Retrograde endocannabinoid signaling	KEGG:04723	FALSE	0.00819619	2.08639	148	744	8	78724	ADCY6,CACNA1A,GNB4,GNG10,NDUFV3,MAPK9,NDUFA13,NDUFB8
KEGG	Gastric cancer	KEGG:05226	FALSE	0.00819619	2.08639	148	744	8	78724	HGF,POLK,RB1,WNT10A,WNT16,AKT1,AXIN1,ERBB2
KEGG	Ras signaling pathway	KEGG:04014	FALSE	0.00844352	2.07348	235	744	10	78724	BCL2L1,GNB4,GNG10,HGF,RASAL2,RASGRP3,AKT1,MAPK9,PDGFD,RASSF1
KEGG	Cocaine addiction	KEGG:05030	FALSE	0.00911005	2.04048	49	744	5	78724	CREB5,GNAS,MAOB,CDK5R1,RGS9
REAC	Immune System	REAC:R-HSA-168256	FALSE	1.84E-75	74.7345	2085	744	143	78724	ADAR,AIM2,AP1S2,AP1S3,BCL2L1,BLNK,BST2,BTK,BTLA,C1QA,C1QC,C3AR1,C5,CA1,CASP1,CCR2,CD180,CD19,CD1C,CD22,CD274,CD86,CLEC10A,CLEC4C,CLEC7A,CTSE,CTSL,CTSV,CXCL10,CYBB,DAPP1,DDX3X,DNAJC13,DNM1,DTX3L,DUSP3,EIF2AK2,EIF2S3,FANCL,FCGR2B,FOLR3,GBP1,GBP3,HERC5,HERC6,HEXB,HGF,HLA-DMA,HLA-DMB,HLA-DRA,IDH1,IFI16,IFI27,IFI35,IFI6,IFIH1,IFIT1,IFIT2,IFIT3,IFIT5,IFITM3,IL15,IL1RN,IL2,IL31RA,IL7,IRAK3,IRF7,IRF9,ISG…
REAC	Signal Transduction	REAC:R-HSA-162582	FALSE	1.67E-50	49.778	2558	744	127	78724	ADCY6,ALDH1A1,ANOS1,ARHGAP24,ARHGAP44,BCL2L1,BTK,C3AR1,C5,CALCRL,CAV1,CCR2,CCRL2,CD19,CD274,CD86,CHD1,COL4A3,CPNE8,CXCL10,CXCL9,CYBB,DEPDC1B,DHRS9,DIAPH3,DNM1,DOCK4,DUSP3,EPSTI1,FFAR2,FGD4,FPR3,FSTL1,GNAS,GNB4,GNG10,H4C1,HGF,HSPB1,IL2,INHBB,JAK2,MIB1,NCKAP1L,NRG1,NTSR1,PHIP,PIK3AP1,PIP5K1B,PKN2,PLEKHG1,PNOC,PROKR2,PSME2,PTPRF,PTPRO,RASAL2,RASGRP3,RICTOR,SLC38A9,SMAD1,SOX6,SPTA1,STARD13,STAT1,STRA…
REAC	Cytokine Signaling in Immune system	REAC:R-HSA-1280215	FALSE	5.74E-45	44.2413	780	744	72	78724	ADAR,BCL2L1,BLNK,BST2,CA1,CASP1,CCR2,CD86,CXCL10,DUSP3,EIF2AK2,EIF2S3,FANCL,GBP1,GBP3,HERC5,HGF,HLA-DRA,IFI27,IFI35,IFI6,IFIT1,IFIT2,IFIT3,IFIT5,IFITM3,IL15,IL1RN,IL2,IL31RA,IL7,IRAK3,IRF7,IRF9,ISG15,JAK2,LGALS9,MAP2K6,MX1,MX2,OAS1,OAS2,OAS3,OASL,OSMR,PRLR,PSME2,RSAD2,SERPINB2,SNCA,SP100,STAT1,STAT2,TNFSF13B,TNFSF15,TRIM22,TRIM38,TRIM5,TUBB6,UBE2L6,USP18,XAF1,AKT1,CCL3L3,HSPA1L,IL2RB,MAPK9,NCAM1,…
REAC	Interferon Signaling	REAC:R-HSA-913531	FALSE	9.23E-37	36.035	263	744	43	78724	ADAR,BST2,EIF2AK2,EIF2S3,FANCL,GBP1,GBP3,HERC5,HLA-DRA,IFI27,IFI35,IFI6,IFIT1,IFIT2,IFIT3,IFIT5,IFITM3,IRF7,IRF9,ISG15,JAK2,MAP2K6,MX1,MX2,OAS1,OAS2,OAS3,OASL,RSAD2,SNCA,SP100,STAT1,STAT2,TRIM22,TRIM38,TRIM5,TUBB6,UBE2L6,USP18,XAF1,HSPA1L,NCAM1,SMAD7
REAC	Metabolism	REAC:R-HSA-1430728	FALSE	5.75E-30	29.2402	2100	744	90	78724	AANAT,ABCG2,ACO1,ACOT9,ADCY6,ALAS2,ALDH1A1,BLVRA,CA1,CACNA1A,CACNA1E,CAV1,DDAH1,DSE,ENTPD2,FECH,FOLR2,GCH1,GK,GLRX5,GLYATL2,GNAS,GNB4,GNG10,GPC4,HELZ2,HEXB,HNMT,HSD17B4,IDH1,IL4I1,KMO,MAOB,NDUFV3,NME4,NT5C2,OPLAH,OSBPL10,OSBPL1A,PARP14,PARP9,PDP1,PHKB,PIP5K1B,PLPP3,PNPLA4,PSME2,PUDP,SAT1,SDC3,SDSL,SLC44A1,SLC45A2,SPTLC2,TCN2,UGT8,ACADVL,ACOT2,AK5,AKAP5,AKR1C3,AKT1,B4GALT4,CA6,CARNS1,CBS,CD320,CDO…
REAC	Interferon alpha/beta signaling	REAC:R-HSA-909733	FALSE	3.98E-29	28.3997	76	744	25	78724	ADAR,BST2,EIF2AK2,IFI27,IFI35,IFI6,IFIT1,IFIT2,IFIT3,IFIT5,IFITM3,IRF7,IRF9,ISG15,MX1,MX2,OAS1,OAS2,OAS3,OASL,RSAD2,STAT1,STAT2,USP18,XAF1
REAC	Disease	REAC:R-HSA-1643685	FALSE	6.29E-29	28.2016	1843	744	83	78724	ADCY6,ANO5,AP1S2,AP1S3,ATP1B1,BCL11A,BCL2L1,BLNK,BST2,BTK,C1GALT1,C3AR1,CASP1,CAV1,CD19,CD86,CTSL,EIF2AK2,GNAS,GNB4,GNG10,GPC4,H2BC18,H4C1,HERC5,HEXB,HGF,IDH1,IFIH1,IRF7,ISG15,JAK2,MIB1,MLKL,MRC1,NCKAP1L,NRG1,OAS2,OPLAH,PARP14,PARP9,PIK3AP1,PSME2,RB1,RBBP8,RICTOR,SDC3,SERPING1,SLC1A3,SLC7A7,SLC9A9,STAT1,STAT2,TCN2,TLR10,TLR7,TUBB6,UBE2L6,VPS45,ZBP1,AKT1,AXIN1,CCND3,CD320,CDK5R1,CYFIP2,DLL1,ERBB2,…
REAC	Adaptive Immune System	REAC:R-HSA-1280218	FALSE	1.36E-22	21.867	810	744	50	78724	AP1S2,AP1S3,BLNK,BTK,BTLA,CD19,CD1C,CD22,CD274,CD86,CTSE,CTSL,CTSV,CYBB,DAPP1,DNM1,DTX3L,FCGR2B,HERC5,HERC6,HLA-DMA,HLA-DMB,HLA-DRA,MRC1,OSBPL1A,PIK3AP1,PSME2,RASGRP3,RICTOR,SIAH2,SIGLEC1,SIGLEC6,TUBB6,UBE2L6,AKT1,BTBD6,CD1B,FBXL18,FBXW5,KIR2DL1,KIR3DL1,KIR3DL2,KLRD1,KLRF1,LAIR2,MEX3C,NFATC2,PRR5,SH2D1B,TRIM32
REAC	Innate Immune System	REAC:R-HSA-168249	FALSE	4.24E-19	18.3722	1100	744	53	78724	AIM2,BCL2L1,BST2,BTK,C1QA,C1QC,C3AR1,C5,CASP1,CCR2,CD180,CD19,CLEC10A,CLEC4C,CLEC7A,CTSL,CTSV,CYBB,DDX3X,DNAJC13,DNM1,DUSP3,FOLR3,HERC5,HEXB,IDH1,IFI16,IFIH1,IRAK3,IRF7,ISG15,LYZ,MAP2K6,NCKAP1L,PSME2,SERPING1,TLR10,TLR7,UBE2L6,USP18,ZBP1,ATP6V0E2,CHI3L1,CYFIP2,GNLY,GZMM,KLRD1,MAPK9,NFATC2,RHOF,S100B,TRIM32,TXK
REAC	Infectious disease	REAC:R-HSA-5663205	FALSE	2.56E-15	14.5912	1062	744	47	78724	ADCY6,ANO5,AP1S2,AP1S3,ATP1B1,BCL2L1,BLNK,BST2,BTK,C3AR1,CASP1,CAV1,CTSL,EIF2AK2,GNAS,GNB4,GNG10,GPC4,H2BC18,H4C1,HERC5,IFIH1,IRF7,ISG15,JAK2,MRC1,NCKAP1L,OAS2,PARP14,PARP9,PSME2,RB1,SDC3,STAT1,STAT2,TLR7,TUBB6,UBE2L6,VPS45,ZBP1,AKT1,CYFIP2,MED27,MGAT4A,NOXA1,PARP16,PATJ
REAC	Antiviral mechanism by IFN-stimulated genes	REAC:R-HSA-1169410	FALSE	9.46E-15	14.024	147	744	20	78724	ADAR,EIF2AK2,EIF2S3,FANCL,HERC5,IFIT1,ISG15,MAP2K6,MX1,MX2,OAS1,OAS2,OAS3,OASL,SNCA,STAT1,TUBB6,UBE2L6,USP18,HSPA1L
REAC	Signaling by Interleukins	REAC:R-HSA-449147	FALSE	4.07E-14	13.3906	476	744	31	78724	BCL2L1,BLNK,CA1,CASP1,CCR2,CD86,CXCL10,DUSP3,HGF,IL15,IL1RN,IL2,IL31RA,IL7,IRAK3,JAK2,LGALS9,MAP2K6,OSMR,PSME2,SERPINB2,STAT1,STAT2,USP18,AKT1,CCL3L3,IL2RB,MAPK9,NDN,PTPN7,S100B
REAC	Signaling by GPCR	REAC:R-HSA-372790	FALSE	1.80E-13	12.7436	695	744	36	78724	ADCY6,BTK,C3AR1,C5,CALCRL,CCR2,CCRL2,CXCL10,CXCL9,FFAR2,FGD4,FPR3,GNAS,GNB4,GNG10,NTSR1,PNOC,PROKR2,WNT10A,WNT16,AKT1,CAMKK1,CCL28,CCL3L3,DGKK,DGKQ,F2R,GNRHR,GPR176,NMUR1,PDE3B,PTGDR,PTGDR2,RGS9,S1PR5,TACR2
REAC	Interferon gamma signaling	REAC:R-HSA-877300	FALSE	2.29E-13	12.6409	91	744	16	78724	GBP1,GBP3,HLA-DRA,IRF7,IRF9,JAK2,OAS1,OAS2,OAS3,OASL,SP100,TRIM22,TRIM38,TRIM5,NCAM1,SMAD7
REAC	RHO GTPase cycle	REAC:R-HSA-9012999	FALSE	5.00E-13	12.3013	449	744	29	78724	ARHGAP24,ARHGAP44,CAV1,CPNE8,CYBB,DEPDC1B,DIAPH3,DOCK4,EPSTI1,FGD4,NCKAP1L,PHIP,PKN2,PLEKHG1,RASAL2,STARD13,SWAP70,VRK2,ARHGEF28,CYFIP2,DOCK6,FAM169A,GFOD1,HINT2,MYO6,NOXA1,PARD6B,PLEKHG4,RHOF
REAC	Gene expression (Transcription)	REAC:R-HSA-74160	FALSE	6.41E-12	11.1934	1518	744	51	78724	CASP1,CAV1,CCNA1,CHEK2,CTSL,CTSV,E2F8,EAF2,H4C1,IL2,KDM6A,LMO2,MAP2K6,NFIB,PAX5,PSME2,RB1,RBBP8,RICTOR,SETD9,SLC38A9,SMAD1,STAT1,TDRD1,ZNF205,ZNF354A,ZNF705A,ZNF860,AKT1,AXIN1,CCND3,CDK5R1,DDIT4,DLL1,ERBB2,ESRRA,LDB1,MED27,NFATC2,NR1D2,NR2F6,PHF1,PLK3,PRR5,SARNP,SMAD7,WDR82,ZFPM1,ZNF208,ZNF212,ZNF266
REAC	Viral Infection Pathways	REAC:R-HSA-9824446	FALSE	6.88E-12	11.1622	873	744	38	78724	ANO5,AP1S2,AP1S3,ATP1B1,BCL2L1,BLNK,BST2,BTK,CASP1,CAV1,CTSL,EIF2AK2,GPC4,H2BC18,H4C1,HERC5,IFIH1,IRF7,ISG15,JAK2,OAS2,PARP14,PARP9,PSME2,RB1,SDC3,STAT1,STAT2,TLR7,TUBB6,UBE2L6,VPS45,ZBP1,AKT1,MED27,MGAT4A,PARP16,PATJ
REAC	GPCR downstream signalling	REAC:R-HSA-388396	FALSE	9.61E-12	11.0171	622	744	32	78724	ADCY6,BTK,C3AR1,C5,CALCRL,CCR2,CXCL10,CXCL9,FFAR2,FGD4,FPR3,GNAS,GNB4,GNG10,NTSR1,PNOC,PROKR2,AKT1,CAMKK1,CCL28,DGKK,DGKQ,F2R,GNRHR,GPR176,NMUR1,PDE3B,PTGDR,PTGDR2,RGS9,S1PR5,TACR2
REAC	SARS-CoV Infections	REAC:R-HSA-9679506	FALSE	4.57E-11	10.3397	459	744	27	78724	ANO5,ATP1B1,BCL2L1,BLNK,BST2,BTK,CASP1,CAV1,CTSL,GPC4,IFIH1,IRF7,ISG15,JAK2,PARP14,PARP9,RB1,SDC3,STAT1,STAT2,TLR7,VPS45,ZBP1,AKT1,MGAT4A,PARP16,PATJ
REAC	Generic Transcription Pathway	REAC:R-HSA-212436	FALSE	5.94E-11	10.226	1234	744	44	78724	CASP1,CAV1,CCNA1,CHEK2,CTSL,CTSV,E2F8,H4C1,IL2,LMO2,MAP2K6,PAX5,PSME2,RB1,RBBP8,RICTOR,SETD9,SLC38A9,SMAD1,STAT1,ZNF205,ZNF354A,ZNF705A,ZNF860,AKT1,AXIN1,CCND3,CDK5R1,DDIT4,DLL1,ERBB2,ESRRA,LDB1,MED27,NFATC2,NR1D2,NR2F6,PLK3,PRR5,SMAD7,ZFPM1,ZNF208,ZNF212,ZNF266
REAC	Signaling by Rho GTPases, Miro GTPases and RHOBTB3	REAC:R-HSA-9716542	FALSE	8.00E-11	10.0969	716	744	33	78724	ARHGAP24,ARHGAP44,BTK,CAV1,CPNE8,CYBB,DEPDC1B,DIAPH3,DOCK4,EPSTI1,FGD4,H4C1,NCKAP1L,PHIP,PKN2,PLEKHG1,RASAL2,STARD13,SWAP70,TRAK2,TUBB6,VRK2,ARHGEF28,CYFIP2,DOCK6,FAM169A,GFOD1,HINT2,MYO6,NOXA1,PARD6B,PLEKHG4,RHOF
REAC	Hemostasis	REAC:R-HSA-109582	FALSE	8.80E-11	10.0557	675	744	32	78724	ANXA5,ATP1B1,CAV1,DOCK4,GNAS,GNB4,GNG10,GYPA,HGF,JAK2,LHFPL2,S100A10,SDC3,SERPINB2,SERPING1,SLC7A7,SLC8A3,TUBB6,VPS45,AKT1,CTSW,DGKK,DGKQ,DOCK6,F2R,KIFC2,MAFF,MANF,PAFAH2,PDE9A,SELENOP,ZFPM1
REAC	RNA Polymerase II Transcription	REAC:R-HSA-73857	FALSE	9.14E-11	10.0391	1355	744	46	78724	CASP1,CAV1,CCNA1,CHEK2,CTSL,CTSV,E2F8,EAF2,H4C1,IL2,LMO2,MAP2K6,PAX5,PSME2,RB1,RBBP8,RICTOR,SETD9,SLC38A9,SMAD1,STAT1,ZNF205,ZNF354A,ZNF705A,ZNF860,AKT1,AXIN1,CCND3,CDK5R1,DDIT4,DLL1,ERBB2,ESRRA,LDB1,MED27,NFATC2,NR1D2,NR2F6,PLK3,PRR5,SARNP,SMAD7,ZFPM1,ZNF208,ZNF212,ZNF266
REAC	Signaling by Rho GTPases	REAC:R-HSA-194315	FALSE	2.41E-10	9.61796	701	744	32	78724	ARHGAP24,ARHGAP44,BTK,CAV1,CPNE8,CYBB,DEPDC1B,DIAPH3,DOCK4,EPSTI1,FGD4,H4C1,NCKAP1L,PHIP,PKN2,PLEKHG1,RASAL2,STARD13,SWAP70,TUBB6,VRK2,ARHGEF28,CYFIP2,DOCK6,FAM169A,GFOD1,HINT2,MYO6,NOXA1,PARD6B,PLEKHG4,RHOF
REAC	GPCR ligand binding	REAC:R-HSA-500792	FALSE	3.26E-10	9.48707	460	744	26	78724	C3AR1,C5,CALCRL,CCR2,CCRL2,CXCL10,CXCL9,FFAR2,FPR3,GNAS,GNB4,GNG10,NTSR1,PNOC,PROKR2,WNT10A,WNT16,CCL28,CCL3L3,F2R,GNRHR,NMUR1,PTGDR,PTGDR2,S1PR5,TACR2
REAC	Signaling by Receptor Tyrosine Kinases	REAC:R-HSA-9006934	FALSE	7.12E-10	9.14741	516	744	27	78724	ANOS1,CAV1,CD274,COL4A3,CYBB,DNM1,DUSP3,HGF,HSPB1,JAK2,NCKAP1L,NRG1,PTPRF,PTPRO,RICTOR,STAT1,AKT1,ATP6V0E2,CDK5R1,CYFIP2,ERBB2,FGFBP2,LAMC3,PDE3B,PDGFD,PRR5,S100B
REAC	PKR-mediated signaling	REAC:R-HSA-9833482	FALSE	3.46E-09	8.46095	75	744	12	78724	ADAR,EIF2AK2,EIF2S3,FANCL,HERC5,ISG15,MAP2K6,SNCA,STAT1,TUBB6,UBE2L6,HSPA1L
REAC	Metabolism of proteins	REAC:R-HSA-392499	FALSE	5.55E-09	8.25577	2064	744	55	78724	C1GALT1,CALB1,CCNA1,EIF2AK2,EIF2S3,FECH,FOLR2,FSTL1,GALNT5,GALNTL6,GCNT1,GNB4,GNG10,H2BC18,H4C1,IFIH1,INHBB,LY6E,LYPD6B,LYZ,MRPL12,NDUFV3,NSF,PIGN,PSME2,SIAH2,SMAD1,SMC6,SNCA,SP100,SPTA1,TPGS2,TUBB6,UBE2L6,USP18,USP25,WARS1,ACOT2,AXIN1,B4GALT4,BTBD6,DDA1,EEF2KMT,FBXL18,FBXW5,GALNT12,LY6G6C,MGAT4A,MRPL4,NDUFA13,PRSS23,RAB40B,RGS9,SMAD7,SPON2
REAC	RAC1 GTPase cycle	REAC:R-HSA-9013149	FALSE	1.64E-08	7.78398	184	744	16	78724	ARHGAP24,ARHGAP44,CAV1,CYBB,DEPDC1B,DIAPH3,DOCK4,NCKAP1L,PKN2,PLEKHG1,SWAP70,VRK2,CYFIP2,DOCK6,NOXA1,PLEKHG4
REAC	Neuronal System	REAC:R-HSA-112316	FALSE	3.08E-08	7.51106	399	744	22	78724	ADCY6,CACNA1A,CACNA1E,CACNA2D3,EPB41L3,GNB4,GNG10,KCNH7,NLGN1,NRG1,NSF,PDLIM5,PTPRF,SLC1A3,SLITRK4,TUBB6,AKAP5,APBA2,CAMKK1,KCNQ5,MYO6,TSPOAP1
REAC	SARS-CoV-2 Infection	REAC:R-HSA-9694516	FALSE	3.81E-08	7.41862	292	744	19	78724	ANO5,CAV1,CTSL,GPC4,IFIH1,IRF7,ISG15,PARP14,PARP9,RB1,SDC3,STAT1,STAT2,TLR7,VPS45,AKT1,MGAT4A,PARP16,PATJ
REAC	Class A/1 (Rhodopsin-like receptors)	REAC:R-HSA-373076	FALSE	3.87E-08	7.41181	328	744	20	78724	C3AR1,C5,CCR2,CCRL2,CXCL10,CXCL9,FFAR2,FPR3,NTSR1,PNOC,PROKR2,CCL28,CCL3L3,F2R,GNRHR,NMUR1,PTGDR,PTGDR2,S1PR5,TACR2
REAC	Diseases of signal transduction by growth factor receptors and second messengers	REAC:R-HSA-5663202	FALSE	2.32E-07	6.63539	444	744	22	78724	BCL11A,BCL2L1,CD19,CD86,HGF,JAK2,MIB1,NRG1,PIK3AP1,PSME2,RB1,RICTOR,STAT1,AKT1,AXIN1,DLL1,ERBB2,GZMB,MAPK9,PRF1,PRR5,SPRED3
REAC	Metabolism of vitamins and cofactors	REAC:R-HSA-196854	FALSE	3.26E-07	6.48703	193	744	15	78724	ACO1,FOLR2,GCH1,GPC4,IDH1,PARP14,PARP9,SDC3,TCN2,AKR1C3,AKT1,CD320,MMAB,PARP16,SLC25A32
REAC	Peptide ligand-binding receptors	REAC:R-HSA-375276	FALSE	3.76E-07	6.42486	195	744	15	78724	C3AR1,C5,CCR2,CCRL2,CXCL10,CXCL9,FPR3,NTSR1,PNOC,PROKR2,CCL28,CCL3L3,F2R,NMUR1,TACR2
REAC	Toll-like Receptor Cascades	REAC:R-HSA-168898	FALSE	3.83E-07	6.4169	165	744	14	78724	BTK,CD180,CTSL,CTSV,DNM1,DUSP3,IRAK3,IRF7,MAP2K6,TLR10,TLR7,USP18,MAPK9,S100B
REAC	Metabolism of lipids	REAC:R-HSA-556833	FALSE	5.93E-07	6.22673	747	744	28	78724	ABCG2,ACOT9,CAV1,GK,HELZ2,HEXB,HSD17B4,OSBPL10,OSBPL1A,PIP5K1B,PLPP3,PNPLA4,SLC44A1,SPTLC2,UGT8,ACADVL,ACOT2,AKR1C3,DHCR24,EPHX2,ESRRA,MED27,NPAS2,PNPLA7,PTGES,SMPD3,SYNJ2,TSPOAP1
REAC	RSV-host interactions	REAC:R-HSA-9833110	FALSE	1.16606E-06	5.93328	97	744	11	78724	EIF2AK2,GPC4,HERC5,IFIH1,ISG15,OAS2,SDC3,STAT2,TLR7,UBE2L6,MED27
REAC	Immunoregulatory interactions between a Lymphoid and a non-Lymphoid cell	REAC:R-HSA-198933	FALSE	1.37739E-06	5.86094	182	744	14	78724	CD19,CD1C,CD22,FCGR2B,SIGLEC1,SIGLEC6,CD1B,KIR2DL1,KIR3DL1,KIR3DL2,KLRD1,KLRF1,LAIR2,SH2D1B
REAC	Post-translational protein modification	REAC:R-HSA-597592	FALSE	4.65437E-06	5.33214	1451	744	39	78724	C1GALT1,CCNA1,EIF2AK2,FOLR2,FSTL1,GALNT5,GALNTL6,GCNT1,H2BC18,H4C1,IFIH1,LY6E,LYPD6B,NSF,PIGN,PSME2,SIAH2,SMAD1,SMC6,SP100,SPTA1,TPGS2,TUBB6,USP18,USP25,AXIN1,B4GALT4,BTBD6,DDA1,EEF2KMT,FBXL18,FBXW5,GALNT12,LY6G6C,MGAT4A,PRSS23,RAB40B,SMAD7,SPON2
REAC	MAPK family signaling cascades	REAC:R-HSA-5683057	FALSE	4.89895E-06	5.3099	310	744	17	78724	BCL2L1,HGF,HSPB1,IL2,JAK2,NRG1,PSME2,RASAL2,RASGRP3,SPTA1,CCND3,DUSP2,ERBB2,IL2RB,NCAM1,PTPN7,SPRED3
REAC	G alpha (i) signalling events	REAC:R-HSA-418594	FALSE	5.13727E-06	5.28927	311	744	17	78724	ADCY6,C3AR1,C5,CCR2,CXCL10,CXCL9,FPR3,GNAS,GNB4,GNG10,PNOC,CAMKK1,CCL28,NMUR1,PTGDR2,RGS9,S1PR5
[truncated: 39 more rows]
