# Supplementary material
Source: Research Square preprint supplement (doi:10.21203/rs.3.rs-8976053/v1)
Supplement: Supplementary file 17 [file ff57cb3a943f6722a6f65380.xlsx]

## Sheet: Sheet1
source	term_name	term_id	highlighted	adjusted_p_value	negative_log10_of_adjusted_p_value	term_size	query_size	intersection_size	effective_domain_size	intersections
GO:MF	catalytic activity	GO:0003824	FALSE	5e-324	323.306	6817	3059	1177	78724	CYBA,MAP2K2,NCF1,AGPAT2,LAMTOR2,NDUFB1,RIN3,CTSD,CES1,NLRC4,CTSB,RAB5C,CAPNS2,ARL8A,HK2,RANBP3,CHST15,GSK3A,HK3,RNASE2,B4GALT5,NDUFS2,CCND3,LMTK2,PTEN,DENND1A,RNF208,ASPRV1,MIER2,SBF2,RAB32,RNASEL,ANAPC11,MARK2,NEK4,ARAP1,ZDHHC12,CYB5R3,LOXL3,MPST,TBC1D10B,SH3BP5L,UBE2S,TRIM8,RRAGD,TST,CASP1,UPF1,SIPA1,PSENEN,AATK,SH2D3C,B3GALT4,MAST3,MGST2,HTRA3,NRG1,RNF111,AGPAT3,MGST1,FKBP4,WWP2,EXTL3,QSOX1,TE…
GO:MF	small molecule binding	GO:0036094	FALSE	5e-324	323.306	6577	3059	1080	78724	CYBA,MAP2K2,NCF1,ACTR1A,LAMTOR2,RIN3,TWF2,NLRC4,TRPC6,RAB5C,CAPNS2,CACNA1E,ARL8A,HK2,CHST15,GSK3A,HK3,ZNF672,MTF1,B4GALT5,NDUFS2,LMTK2,DENND1A,RNF208,SBF2,RAB32,RNASEL,ANAPC11,S100A12,CAPG,MARK2,NEK4,ARAP1,PCDH1,CYB5R3,LOXL3,SH3BP5L,UBE2S,TRIM8,RRAGD,ZFYVE1,UPF1,TYROBP,DYSF,TCN2,AATK,CLCN4,SH2D3C,MAST3,MGST2,RNF111,RXRA,FKBP4,EXTL3,QSOX1,TESC,RPH3AL,DEAF1,FCN1,RIPK3,TP53I3,RAB7A,BCL6,STAR,RFC2,PG…
GO:MF	ion binding	GO:0043167	FALSE	5e-324	323.306	6377	3059	1037	78724	CYBA,MAP2K2,NCF1,ACTR1A,LAMTOR2,RIN3,TWF2,NLRC4,TRPC6,RAB5C,CAPNS2,CACNA1E,ARL8A,HK2,CHST15,GSK3A,HK3,ZNF672,MTF1,B4GALT5,NDUFS2,LMTK2,DENND1A,RNF208,SBF2,RAB32,RNASEL,ANAPC11,S100A12,CAPG,MARK2,NEK4,ARAP1,PCDH1,CYB5R3,LOXL3,SH3BP5L,UBE2S,TRIM8,RRAGD,ZFYVE1,UPF1,TYROBP,DYSF,TCN2,AATK,CLCN4,SH2D3C,MAST3,MGST2,RNF111,RXRA,FKBP4,EXTL3,QSOX1,TESC,RPH3AL,DEAF1,FCN1,RIPK3,TP53I3,RAB7A,BCL6,RFC2,RNF181,…
GO:MF	protein binding	GO:0005515	TRUE	5e-324	323.306	15123	3059	2456	78724	POMP,CYBA,MAP2K2,NCF1,ACTR1A,LAMTOR2,RIN3,MIIP,SEMA4D,VPS37B,MAFG,TWF2,CTSD,CES1,AGTRAP,NLRC4,TRPC6,CTSB,RAB5C,CAPNS2,LAPTM5,ARL8A,ANKRD22,HK2,RANBP3,TMEM60,NACC2,IGFLR1,CHST15,BRI3,DOK1,COPA,GSK3A,HK3,KLHDC8B,ZNF672,MTF1,NSFL1C,RNASE2,B4GALT5,SHISA5,EMILIN2,CD300C,NDUFS2,CCND3,LRRC61,SYNGR1,CEBPA,LMTK2,PTEN,SLC16A3,DENND1A,AP1B1,RNF208,MIER2,DYNLT1,SBF2,RAB32,ANKS1A,CKAP4,F11R,RNASEL,SELPLG,ANAP…
GO:MF	binding	GO:0005488	FALSE	5e-324	323.306	18498	3059	2652	78724	POMP,CYBA,MAP2K2,NCF1,ACTR1A,LAMTOR2,RIN3,MIIP,SEMA4D,VPS37B,MAFG,TWF2,CTSD,CES1,AGTRAP,NLRC4,TRPC6,CTSB,RAB5C,CAPNS2,CACNA1E,LAPTM5,ARL8A,ANKRD22,HK2,RANBP3,TMEM60,NACC2,IGFLR1,CHST15,BRI3,DOK1,COPA,GSK3A,HK3,KLHDC8B,ZNF672,MTF1,NSFL1C,RNASE2,B4GALT5,SHISA5,EMILIN2,CD300C,NDUFS2,CCND3,LRRC61,SYNGR1,CEBPA,LMTK2,PTEN,SLC16A3,DENND1A,AP1B1,RNF208,MIER2,DYNLT1,SBF2,RAB32,ANKS1A,CKAP4,F11R,RNASEL,SEL…
GO:MF	molecular_function	GO:0003674	FALSE	5e-324	323.306	20246	3059	2805	78724	ANO10,POMP,CYBA,MAP2K2,NCF1,AGPAT2,ACTR1A,SERF2,LAMTOR2,NDUFB1,RIN3,MIIP,SEMA4D,VPS37B,MAFG,TWF2,CTSD,CES1,AGTRAP,NLRC4,TRPC6,CTSB,RAB5C,CAPNS2,CACNA1E,LAPTM5,ARL8A,ANKRD22,HK2,RANBP3,TMEM60,NACC2,IGFLR1,CHST15,BRI3,DOK1,COPA,GSK3A,HK3,KLHDC8B,ZNF672,MTF1,NSFL1C,RNASE2,B4GALT5,SHISA5,EMILIN2,CD300C,NDUFS2,CCND3,LRRC61,SYNGR1,CEBPA,LMTK2,PTEN,SLC16A3,DENND1A,AP1B1,RNF208,ASPRV1,MIER2,DYNLT1,SBF2,R…
GO:MF	cation binding	GO:0043169	FALSE	1.08E-222	221.967	4495	3059	689	78724	CYBA,MAP2K2,NLRC4,CAPNS2,CACNA1E,ZNF672,MTF1,B4GALT5,NDUFS2,RNF208,RNASEL,ANAPC11,S100A12,MARK2,NEK4,ARAP1,PCDH1,CYB5R3,LOXL3,TRIM8,ZFYVE1,UPF1,TYROBP,DYSF,TCN2,AATK,MAST3,RNF111,RXRA,EXTL3,TESC,RPH3AL,DEAF1,FCN1,BCL6,RNF181,GNA15,TSHZ3,JMJD6,PDXK,LCP1,RP2,CRACR2B,RNPEPL1,S100P,REPS2,TAP1,MSRB2,GPD2,SRPK1,ZNF467,NQO2,PHRF1,CSGALNACT2,SLC1A5,SMPDL3A,ZNF341,PLAGL1,KLF5,F12,ATP11A,UNC13D,VDR,PRKCD,C…
GO:MF	metal ion binding	GO:0046872	FALSE	1.24E-216	215.906	4396	3059	673	78724	CYBA,MAP2K2,NLRC4,CAPNS2,CACNA1E,ZNF672,MTF1,B4GALT5,NDUFS2,RNF208,RNASEL,ANAPC11,S100A12,MARK2,NEK4,ARAP1,PCDH1,LOXL3,TRIM8,ZFYVE1,UPF1,TYROBP,DYSF,TCN2,AATK,MAST3,RNF111,RXRA,EXTL3,TESC,RPH3AL,DEAF1,FCN1,BCL6,RNF181,GNA15,TSHZ3,JMJD6,PDXK,LCP1,RP2,CRACR2B,RNPEPL1,S100P,REPS2,TAP1,MSRB2,GPD2,SRPK1,ZNF467,NQO2,PHRF1,CSGALNACT2,SLC1A5,SMPDL3A,ZNF341,PLAGL1,KLF5,F12,ATP11A,UNC13D,VDR,PRKCD,CETN2,MA…
GO:MF	enzyme binding	GO:0019899	FALSE	8.64E-208	207.063	2107	3059	460	78724	RIN3,TWF2,NLRC4,LAPTM5,RANBP3,NACC2,GSK3A,MTF1,NDUFS2,CCND3,CEBPA,PTEN,DENND1A,AP1B1,MIER2,SBF2,TFEB,TRIM8,RRAGD,CASP1,PSENEN,TNFRSF1B,FLOT2,OS9,TICAM1,JDP2,CTNNB1,NRG1,MVP,RXRA,RPH3AL,TSPAN17,AKIRIN2,DIAPH1,RAB7A,CDC42EP4,RFC2,ARRB1,ARRDC1,HSPA1L,LCP1,CEACAM3,RAD23A,MAPK1,HCLS1,ATP6V0A1,RCOR1,RAC1,PHRF1,SMG5,CDKN2C,SLC9A1,MAP2K6,UNC13D,PRKCD,APOA1,CSF1R,TIMP2,ARHGAP1,SELL,WAS,LAMP1,NCOA6,CEACAM1…
GO:MF	hydrolase activity	GO:0016787	FALSE	8.93E-203	202.049	3255	3059	561	78724	LAMTOR2,RIN3,CTSD,CES1,NLRC4,CTSB,RAB5C,CAPNS2,ARL8A,RANBP3,RNASE2,LMTK2,PTEN,DENND1A,ASPRV1,SBF2,RAB32,RNASEL,ARAP1,TBC1D10B,SH3BP5L,RRAGD,CASP1,UPF1,SIPA1,PSENEN,SH2D3C,HTRA3,TESC,RAB7A,RFC2,ARRB1,RNASEK,GNA15,HSPA1L,GTPBP1,ARHGAP26,NLRP3,RP2,INPP5D,APMAP,RNPEPL1,TAP1,CD101,GLA,RAB24,RAC1,RAB13,SMPDL3A,DNASE2,CTSS,F12,ATP11A,DUSP23,MANBA,ISG20,RALGAPA2,PGLYRP1,ITPK1,BMP2,TOR1A,TBC1D2,TIMP2,ARHG…
GO:MF	anion binding	GO:0043168	FALSE	1.27E-184	183.896	2685	3059	488	78724	MAP2K2,NCF1,ACTR1A,LAMTOR2,RIN3,TWF2,NLRC4,TRPC6,RAB5C,ARL8A,HK2,CHST15,GSK3A,HK3,LMTK2,DENND1A,SBF2,RAB32,RNASEL,CAPG,MARK2,NEK4,ARAP1,CYB5R3,SH3BP5L,UBE2S,RRAGD,ZFYVE1,UPF1,AATK,CLCN4,SH2D3C,MAST3,MGST2,RXRA,FKBP4,QSOX1,FCN1,RIPK3,TP53I3,RAB7A,RFC2,GNA15,WIPI1,HSPA1L,GTPBP1,PDXK,FLII,RP2,MAPK1,TAP1,MAP4K4,RAB24,PDK3,SRPK1,RAC1,RAB13,NQO2,ITPKC,SLC9A1,ATP11A,MAP2K6,RBP7,VDR,PRKCD,MAP3K6,UBE2E3,I…
GO:MF	identical protein binding	GO:0042802	FALSE	5.40E-182	181.268	2182	3059	438	78724	SEMA4D,MAFG,AGTRAP,NLRC4,TRPC6,NACC2,BRI3,CEBPA,PTEN,DYNLT1,SBF2,F11R,RNASEL,S100A12,MPST,TRIM8,CASP1,TYROBP,KLHL2,MGST2,JDP2,HTRA3,MVP,RXRA,TESC,RIPK3,TP53I3,AKIRIN2,BCL6,ARRDC1,JMJD6,PDXK,CD53,MAPK1,S100P,TAP1,GLA,HOMER3,MAP1S,NQO2,RPIA,SLC9A1,MAP2K6,SHKBP1,APOA1,MGST3,TOR1A,CSF1R,WAS,CEACAM1,YWHAG,TLR8,CLIP1,TKT,GRB10,BANP,FCER1G,HDAC5,MAFB,UBASH3B,GRB2,RBCK1,DHRS4,NFIL3,IST1,TNFSF18,PYCARD,SL…
GO:MF	catalytic activity, acting on a protein	GO:0140096	FALSE	2.43E-176	175.614	2849	3059	492	78724	MAP2K2,CTSD,NLRC4,CTSB,CAPNS2,GSK3A,CCND3,LMTK2,PTEN,RNF208,ASPRV1,MIER2,RNASEL,ANAPC11,MARK2,NEK4,ZDHHC12,LOXL3,SH3BP5L,UBE2S,TRIM8,CASP1,PSENEN,AATK,MAST3,HTRA3,NRG1,RNF111,FKBP4,WWP2,QSOX1,TESC,BLVRB,RIPK3,RNF181,JMJD6,FBXO6,FBXW11,MAPK1,RNPEPL1,MAP4K4,PDK3,SRPK1,EFNA4,B3GNT8,CTSS,CDKN2C,FBXO27,F12,MAP2K6,DUSP23,PRKCD,MAP3K6,UBE2E3,BMP2,CSF1R,TIMP2,YWHAG,GRK6,PTPRE,SYK,RNF144B,MAPKAPK2,HP,PARP…
GO:MF	heterocyclic compound binding	GO:1901363	FALSE	1.50E-174	173.825	2558	3059	464	78724	MAP2K2,ACTR1A,LAMTOR2,RIN3,TWF2,NLRC4,RAB5C,ARL8A,HK2,CHST15,GSK3A,HK3,NDUFS2,LMTK2,DENND1A,SBF2,RAB32,RNASEL,MARK2,NEK4,CYB5R3,SH3BP5L,UBE2S,RRAGD,UPF1,TCN2,AATK,CLCN4,SH2D3C,MAST3,FKBP4,QSOX1,RIPK3,TP53I3,RAB7A,RFC2,PGD,GNA15,HSPA1L,GTPBP1,PDXK,RP2,MAPK1,TAP1,MAP4K4,RAB24,PDK3,SRPK1,RAC1,RAB13,NQO2,ITPKC,ATP11A,MAP2K6,PRKCD,MAP3K6,UBE2E3,ITPK1,TOR1A,CSF1R,PFKFB4,LTB4R,VAV1,GRK6,SYK,RAB3GAP2,TKT…
GO:MF	transferase activity	GO:0016740	FALSE	3.38E-171	170.471	2594	3059	463	78724	MAP2K2,AGPAT2,HK2,CHST15,GSK3A,HK3,B4GALT5,CCND3,LMTK2,PTEN,RNF208,RNASEL,ANAPC11,MARK2,NEK4,ZDHHC12,MPST,SH3BP5L,UBE2S,TRIM8,TST,AATK,B3GALT4,MAST3,MGST2,NRG1,RNF111,AGPAT3,MGST1,WWP2,EXTL3,TESC,BLVRB,RIPK3,SAMD8,RNF181,FBXO6,PDXK,FBXW11,MAPK1,MAP4K4,PDK3,SRPK1,EFNA4,CSGALNACT2,ITPKC,B3GNT8,CDKN2C,FBXO27,MAP2K6,PRKCD,MAP3K6,UBE2E3,ITPK1,BMP2,APOA1,MGST3,CSF1R,PFKFB4,YWHAG,GBA2,GRK6,SYK,TKT,RNF14…
GO:MF	carbohydrate derivative binding	GO:0097367	FALSE	5.77E-169	168.239	2536	3059	455	78724	MAP2K2,ACTR1A,LAMTOR2,RIN3,TWF2,NLRC4,CTSB,RAB5C,ARL8A,HK2,CHST15,GSK3A,HK3,LMTK2,DENND1A,SBF2,RAB32,RNASEL,MARK2,NEK4,CYB5R3,SH3BP5L,UBE2S,RRAGD,UPF1,AATK,CLCN4,SH2D3C,MAST3,FKBP4,FCN1,RIPK3,RAB7A,RFC2,GNA15,HSPA1L,GTPBP1,PDXK,RP2,MAPK1,TAP1,GLA,MAP4K4,RAB24,PDK3,SRPK1,RAC1,RAB13,ITPKC,CTSS,ATP11A,CAMP,MAP2K6,PRKCD,MAP3K6,PGLYRP1,UBE2E3,ITPK1,TOR1A,CSF1R,SELL,PFKFB4,VAV1,HPSE,GRK6,SYK,RAB3GAP2,R…
GO:MF	nucleoside phosphate binding	GO:1901265	FALSE	1.14E-162	161.942	2424	3059	437	78724	MAP2K2,ACTR1A,LAMTOR2,RIN3,TWF2,NLRC4,RAB5C,ARL8A,HK2,CHST15,GSK3A,HK3,NDUFS2,LMTK2,DENND1A,SBF2,RAB32,RNASEL,MARK2,NEK4,CYB5R3,SH3BP5L,UBE2S,RRAGD,UPF1,AATK,CLCN4,SH2D3C,MAST3,FKBP4,QSOX1,RIPK3,TP53I3,RAB7A,RFC2,PGD,GNA15,HSPA1L,GTPBP1,PDXK,RP2,MAPK1,TAP1,MAP4K4,RAB24,PDK3,SRPK1,RAC1,RAB13,NQO2,ITPKC,ATP11A,MAP2K6,PRKCD,MAP3K6,UBE2E3,ITPK1,TOR1A,CSF1R,PFKFB4,LTB4R,VAV1,GRK6,SYK,RAB3GAP2,RHOG,MAP…
GO:MF	nucleotide binding	GO:0000166	FALSE	2.28E-162	161.641	2406	3059	435	78724	MAP2K2,ACTR1A,LAMTOR2,RIN3,TWF2,NLRC4,RAB5C,ARL8A,HK2,CHST15,GSK3A,HK3,NDUFS2,LMTK2,DENND1A,SBF2,RAB32,RNASEL,MARK2,NEK4,CYB5R3,SH3BP5L,UBE2S,RRAGD,UPF1,AATK,CLCN4,SH2D3C,MAST3,FKBP4,QSOX1,RIPK3,TP53I3,RAB7A,RFC2,PGD,GNA15,HSPA1L,GTPBP1,PDXK,RP2,MAPK1,TAP1,MAP4K4,RAB24,PDK3,SRPK1,RAC1,RAB13,NQO2,ITPKC,ATP11A,MAP2K6,PRKCD,MAP3K6,UBE2E3,ITPK1,TOR1A,CSF1R,PFKFB4,LTB4R,VAV1,GRK6,SYK,RAB3GAP2,RHOG,MAP…
GO:MF	purine nucleotide binding	GO:0017076	FALSE	1.24E-149	148.905	2241	3059	404	78724	MAP2K2,ACTR1A,LAMTOR2,RIN3,TWF2,NLRC4,RAB5C,ARL8A,HK2,CHST15,GSK3A,HK3,NDUFS2,LMTK2,DENND1A,SBF2,RAB32,RNASEL,MARK2,NEK4,CYB5R3,SH3BP5L,UBE2S,RRAGD,UPF1,AATK,CLCN4,SH2D3C,MAST3,FKBP4,RIPK3,TP53I3,RAB7A,RFC2,PGD,GNA15,HSPA1L,GTPBP1,PDXK,RP2,MAPK1,TAP1,MAP4K4,RAB24,PDK3,SRPK1,RAC1,RAB13,ITPKC,ATP11A,MAP2K6,PRKCD,MAP3K6,UBE2E3,ITPK1,TOR1A,CSF1R,PFKFB4,VAV1,GRK6,SYK,RAB3GAP2,RHOG,MAPKAPK2,ITSN1,GBP6,…
GO:MF	ribonucleotide binding	GO:0032553	FALSE	5.79E-141	140.238	2164	3059	386	78724	MAP2K2,ACTR1A,LAMTOR2,RIN3,TWF2,NLRC4,RAB5C,ARL8A,HK2,CHST15,GSK3A,HK3,LMTK2,DENND1A,SBF2,RAB32,RNASEL,MARK2,NEK4,CYB5R3,SH3BP5L,UBE2S,RRAGD,UPF1,AATK,CLCN4,SH2D3C,MAST3,FKBP4,RIPK3,RAB7A,RFC2,GNA15,HSPA1L,GTPBP1,PDXK,RP2,MAPK1,TAP1,MAP4K4,RAB24,PDK3,SRPK1,RAC1,RAB13,ITPKC,ATP11A,MAP2K6,PRKCD,MAP3K6,UBE2E3,ITPK1,TOR1A,CSF1R,PFKFB4,VAV1,GRK6,SYK,RAB3GAP2,RHOG,MAPKAPK2,ITSN1,GBP6,SESN2,DDX23,TDRD9,…
GO:MF	purine ribonucleotide binding	GO:0032555	FALSE	4.87E-139	138.312	2147	3059	382	78724	MAP2K2,ACTR1A,LAMTOR2,RIN3,TWF2,NLRC4,RAB5C,ARL8A,HK2,CHST15,GSK3A,HK3,LMTK2,DENND1A,SBF2,RAB32,RNASEL,MARK2,NEK4,CYB5R3,SH3BP5L,UBE2S,RRAGD,UPF1,AATK,CLCN4,SH2D3C,MAST3,FKBP4,RIPK3,RAB7A,RFC2,GNA15,HSPA1L,GTPBP1,PDXK,RP2,MAPK1,TAP1,MAP4K4,RAB24,PDK3,SRPK1,RAC1,RAB13,ITPKC,ATP11A,MAP2K6,PRKCD,MAP3K6,UBE2E3,ITPK1,TOR1A,CSF1R,PFKFB4,VAV1,GRK6,SYK,RAB3GAP2,RHOG,MAPKAPK2,ITSN1,GBP6,SESN2,DDX23,TDRD9,…
GO:MF	purine ribonucleoside triphosphate binding	GO:0035639	FALSE	1.12E-134	133.952	2087	3059	371	78724	MAP2K2,ACTR1A,LAMTOR2,RIN3,TWF2,NLRC4,RAB5C,ARL8A,HK2,GSK3A,HK3,LMTK2,DENND1A,SBF2,RAB32,RNASEL,MARK2,NEK4,SH3BP5L,UBE2S,RRAGD,UPF1,AATK,CLCN4,SH2D3C,MAST3,FKBP4,RIPK3,RAB7A,RFC2,GNA15,HSPA1L,GTPBP1,PDXK,RP2,MAPK1,TAP1,MAP4K4,RAB24,PDK3,SRPK1,RAC1,RAB13,ITPKC,ATP11A,MAP2K6,PRKCD,MAP3K6,UBE2E3,ITPK1,TOR1A,CSF1R,PFKFB4,VAV1,GRK6,SYK,RAB3GAP2,RHOG,MAPKAPK2,ITSN1,GBP6,DDX23,TDRD9,CARS2,PRKD2,RASGEF1A…
GO:MF	molecular function regulator activity	GO:0098772	FALSE	1.86E-133	132.73	2195	3059	379	78724	MAP2K2,NCF1,LAMTOR2,RIN3,SEMA4D,NLRC4,RAB5C,RANBP3,COPA,NDUFS2,CCND3,LMTK2,PTEN,DENND1A,SBF2,TMEM63B,MARK2,ARAP1,TBC1D10B,SH3BP5L,CASP1,SIPA1,PSENEN,SH2D3C,RETN,MGST2,NRG1,TESC,OAZ2,RAB7A,ARRB1,JMJD6,ARHGAP26,NLRP3,RP2,GRN,SCLT1,RAC1,CTSS,CDKN2C,PRKCD,RALGAPA2,PGLYRP1,SECTM1,BMP2,SEMA4A,APOA1,TBC1D2,TIMP2,ARHGAP1,WAS,LAMP1,YWHAG,TBC1D14,VAV1,RAB3GAP2,GM2A,ITSN1,GRB2,AGFG1,SESN2,RBCK1,RASGEF1A,TNF…
GO:MF	adenyl nucleotide binding	GO:0030554	FALSE	6.27E-108	107.203	1651	3059	297	78724	MAP2K2,ACTR1A,TWF2,NLRC4,HK2,CHST15,GSK3A,HK3,NDUFS2,LMTK2,RNASEL,MARK2,NEK4,CYB5R3,UBE2S,UPF1,AATK,CLCN4,MAST3,FKBP4,RIPK3,TP53I3,RFC2,PGD,HSPA1L,PDXK,MAPK1,TAP1,MAP4K4,PDK3,SRPK1,ITPKC,ATP11A,MAP2K6,PRKCD,MAP3K6,UBE2E3,ITPK1,TOR1A,CSF1R,PFKFB4,GRK6,SYK,MAPKAPK2,DDX23,TDRD9,CARS2,PRKD2,FGR,JAK2,SRPK2,HMGCR,BTK,MAP3K3,CLK3,PDGFRB,POR,PRKACA,SLC27A2,CLP1,NT5C2,DGKG,LRRK1,CAMKK2,MSH6,PHKG1,RUVBL2,S…
GO:MF	nucleic acid binding	GO:0003676	FALSE	4.00E-106	105.398	5433	3059	571	78724	MAFG,TWF2,NACC2,ZNF672,MTF1,RNASE2,CEBPA,SLC16A3,CKAP4,RNASEL,ASCL2,MARK2,ELF4,TFEB,TST,UPF1,JDP2,RXRA,FKBP4,DEAF1,DIAPH1,BCL6,CDC42EP4,RFC2,TSHZ3,JMJD6,GTPBP1,NLRP3,RAD23A,MAPK1,BEND7,GRN,SRPK1,MAP1S,ZNF467,SLIRP,SMG5,TFIP11,DNASE2,ZNF341,SRSF4,PLAGL1,KLF5,FOSL2,VDR,ISG20,TLR7,YWHAG,ZNF319,TLR8,RFX1,ERG,ARID3B,BANP,PARP10,HDAC5,ATF5,MAFB,POLR2A,GRB2,AGFG1,KLF16,DDX23,NACC1,TDRD9,NFIL3,ASCC1,HMG2…
GO:MF	signaling receptor binding	GO:0005102	FALSE	6.89E-101	100.162	1521	3059	276	78724	SEMA4D,COPA,GSK3A,ANKS1A,F11R,SELPLG,S100A12,ARAP1,TYROBP,RETN,CTNNB1,NRG1,FCN1,DIAPH1,ARRB1,GNA15,WIPI1,APOL2,LCP1,IL17RA,GRN,TAP1,GLA,HOMER3,GFRA3,EFNA4,PILRA,GPR17,SMARCD3,PGLYRP1,TMED1,SECTM1,BMP2,SEMA4A,APOA1,S100A8,YWHAG,SYK,OPRD1,GRB10,CCRL2,GRB2,CD151,TNFSF18,FERMT3,TOLLIP,PYCARD,FGR,PXN,JAK2,CCL23,TLR5,AKAP5,GNAI2,IL1B,PANX1,LGALS1,PDGFRB,SIPA1L1,SYTL3,CNIH4,APP,S100A9,SLA,TRIP6,NF2,TLR2…
GO:MF	adenyl ribonucleotide binding	GO:0032559	FALSE	1.53E-97	96.8155	1558	3059	275	78724	MAP2K2,ACTR1A,TWF2,NLRC4,HK2,CHST15,GSK3A,HK3,LMTK2,RNASEL,MARK2,NEK4,CYB5R3,UBE2S,UPF1,AATK,CLCN4,MAST3,FKBP4,RIPK3,RFC2,HSPA1L,PDXK,MAPK1,TAP1,MAP4K4,PDK3,SRPK1,ITPKC,ATP11A,MAP2K6,PRKCD,MAP3K6,UBE2E3,ITPK1,TOR1A,CSF1R,PFKFB4,GRK6,SYK,MAPKAPK2,DDX23,TDRD9,CARS2,PRKD2,FGR,JAK2,SRPK2,BTK,MAP3K3,CLK3,PDGFRB,PRKACA,SLC27A2,CLP1,NT5C2,DGKG,LRRK1,CAMKK2,MSH6,PHKG1,RUVBL2,SRXN1,VPS4B,EHD4,KIF3C,MYO1F,…
GO:MF	enzyme regulator activity	GO:0030234	FALSE	6.05E-97	96.2185	1339	3059	254	78724	MAP2K2,NCF1,LAMTOR2,RIN3,NLRC4,RANBP3,CCND3,LMTK2,PTEN,DENND1A,SBF2,MARK2,ARAP1,TBC1D10B,SH3BP5L,CASP1,SIPA1,PSENEN,SH2D3C,MGST2,NRG1,TESC,OAZ2,ARRB1,ARHGAP26,RP2,CTSS,CDKN2C,PRKCD,RALGAPA2,BMP2,APOA1,TBC1D2,TIMP2,ARHGAP1,WAS,YWHAG,TBC1D14,VAV1,RAB3GAP2,GM2A,ITSN1,GRB2,AGFG1,SESN2,RBCK1,RASGEF1A,PYCARD,HMGCR,SERPINA1,BTK,ACAP2,SERPINB8,FGD3,PDGFRB,SIPA1L1,PPP1R15B,PSME1,CARD16,APP,CARD8,SPINT1,PR…
GO:MF	ATP binding	GO:0005524	FALSE	7.25E-96	95.1396	1516	3059	269	78724	MAP2K2,ACTR1A,TWF2,NLRC4,HK2,GSK3A,HK3,LMTK2,RNASEL,MARK2,NEK4,UBE2S,UPF1,AATK,CLCN4,MAST3,FKBP4,RIPK3,RFC2,HSPA1L,PDXK,MAPK1,TAP1,MAP4K4,PDK3,SRPK1,ITPKC,ATP11A,MAP2K6,PRKCD,MAP3K6,UBE2E3,ITPK1,TOR1A,CSF1R,PFKFB4,GRK6,SYK,MAPKAPK2,DDX23,TDRD9,CARS2,PRKD2,FGR,JAK2,SRPK2,BTK,MAP3K3,CLK3,PDGFRB,PRKACA,SLC27A2,CLP1,NT5C2,DGKG,LRRK1,CAMKK2,MSH6,PHKG1,RUVBL2,SRXN1,VPS4B,EHD4,KIF3C,MYO1F,NMNAT1,ACSBG1,…
GO:MF	DNA binding	GO:0003677	FALSE	1.04E-92	91.9848	2542	3059	349	78724	MAFG,NACC2,ZNF672,MTF1,CEBPA,ASCL2,ELF4,TFEB,UPF1,JDP2,RXRA,DEAF1,BCL6,RFC2,TSHZ3,NLRP3,RAD23A,MAPK1,BEND7,MAP1S,ZNF467,SMG5,DNASE2,ZNF341,PLAGL1,KLF5,FOSL2,VDR,ZNF319,TLR8,RFX1,ERG,ARID3B,BANP,HDAC5,ATF5,MAFB,POLR2A,AGFG1,KLF16,NACC1,NFIL3,HMG20B,FLI1,ZC3H3,BACH1,ATXN1L,CREBBP,RNF138,MEF2A,SPI1,MLXIP,BATF,NR6A1,SETDB1,SAP30,CEBPB,KLF2,APP,ZNF787,IER2,HIF3A,ZNF697,ZNF552,ZNF592,BRD4,ZBTB45,OLIG1,…
GO:MF	protein-containing complex binding	GO:0044877	FALSE	8.37E-88	87.0771	1314	3059	240	78724	TWF2,CTSB,NACC2,PTEN,RAB32,F11R,RNASEL,CAPG,UBE2S,UPF1,ARPC2,NRG1,RIPK3,RAB7A,GNA15,JMJD6,FLII,PSTPIP2,APOL2,LCP1,RAD23A,FBXW11,HCLS1,RAC1,MAP1S,LAMB3,CTSS,CETN2,APOA1,SYK,FCER1G,MAFB,SESN2,IST1,CD151,FERMT3,FGR,SORT1,CREBBP,GNB4,SVIL,GNAI2,IL1B,PANX1,GNB2,CLTA,XPO5,CORO1A,SHARPIN,IGF2R,KCTD5,BRD4,NF2,TLR2,MSH6,RUVBL2,TGFBI,SAP30L,VPS4B,HLA-E,CYFIP1,STXBP3,MYO1F,UBLCP1,PIK3R5,PINK1,DCTN2,LASP1,SP…
GO:MF	molecular adaptor activity	GO:0060090	FALSE	6.99E-86	85.1556	1212	3059	228	78724	MAP2K2,LAMTOR2,MIER2,TRIM8,RRAGD,TYROBP,GAB1,KLHL2,TICAM1,CTNNB1,NRG1,FKBP4,WWP2,MED16,RIPK3,AKIRIN2,ARRB1,ARRDC1,WIPI1,STX10,ARHGAP26,NLRP3,CD53,FBXW11,HCLS1,RCOR1,SLC9A1,SMARCD3,PGLYRP1,TADA2B,NCOA6,HERPUD1,GRB10,ITSN1,PARP10,ANKRD13D,GRB2,AP2S1,ECSIT,RBCK1,TOLLIP,CREBBP,SNAP29,MTMR3,GNB4,AKAP5,FBXO45,SPI1,GNB2,SAP30,TLE4,PA2G4,TJP2,CARD8,PHF13,FKBP5,SHARPIN,PCBD1,BRD4,RUVBL2,SHC1,SAP30L,COL8A2…
GO:MF	transferase activity, transferring phosphorus-containing groups	GO:0016772	FALSE	1.25E-84	83.9018	1176	3059	223	78724	MAP2K2,HK2,GSK3A,HK3,CCND3,LMTK2,RNASEL,MARK2,NEK4,SH3BP5L,AATK,MAST3,NRG1,TESC,RIPK3,SAMD8,PDXK,MAPK1,MAP4K4,PDK3,SRPK1,EFNA4,ITPKC,CDKN2C,MAP2K6,PRKCD,MAP3K6,ITPK1,BMP2,CSF1R,PFKFB4,YWHAG,GRK6,SYK,MAPKAPK2,CDIPT,PARP10,POLR2A,PRKD2,PTDSS2,FGR,JAK2,SRPK2,BTK,MAP3K3,CLK3,PDGFRB,PRKACA,CTU1,TJP2,CLP1,IGF2R,NT5C2,BRD4,DGKG,YWHAB,LRRK1,CAMKK2,PHKG1,LTF,NMNAT1,MAP3K5,PIK3R5,PINK1,STK4,EIF2AK2,PARP9,C…
GO:MF	transporter activity	GO:0005215	FALSE	6.07E-83	82.2169	1351	3059	237	78724	ANO10,NDUFB1,TRPC6,CACNA1E,NDUFS2,SLC16A3,TMEM63B,MFSD9,CLCN4,TIMM17B,ATP6V0E1,SLC35A2,STAR,SLCO4C1,TMEM120A,SLC36A1,ATP6V0A1,TAP1,SCLT1,SLC1A5,APOL1,SLC34A3,SLC9A1,ATP11A,ATG9A,UQCR10,SLC15A3,NDUFB4,APOA1,C2CD2L,LAMP1,CEACAM1,GM2A,ORAI3,SLC7A7,NDUFA1,TSPO,SLC2A1,OSBPL5,GHITM,ATP6AP1,ATP6V1E1,PANX1,SLC22A15,PRKACA,SLC43A2,SLC27A2,SLC31A2,SLC25A22,SLC46A2,SLC24A3,SLC12A9,TMEM30A,SLC4A8,SLC2A14,PLS…
GO:MF	transcription regulator activity	GO:0140110	FALSE	1.42E-81	80.8483	1954	3059	286	78724	MAFG,NACC2,ZNF672,MTF1,CEBPA,MIER2,ASCL2,ELF4,TFEB,TRIM8,JDP2,CTNNB1,NRG1,RXRA,MED16,DEAF1,RIPK3,AKIRIN2,BCL6,ARRB1,TSHZ3,JMJD6,RCOR1,ZNF467,ZNF341,PLAGL1,KLF5,FOSL2,VDR,SMARCD3,TADA2B,NCOA6,ZNF319,RFX1,ERG,PARP10,ATF5,MAFB,KLF16,RBCK1,NACC1,NFIL3,FLI1,BACH1,CREBBP,MEF2A,SPI1,MLXIP,BATF,NR6A1,SAP30,TLE4,PA2G4,CEBPB,KLF2,ZNF787,HIF3A,ZNF697,ZNF552,PCBD1,ZNF592,BRD4,ZBTB45,OLIG1,RUVBL2,ZBTB47,SAP30…
GO:MF	protein domain specific binding	GO:0019904	FALSE	1.77E-79	78.7526	655	3059	163	78724	CYBA,MAP2K2,NCF1,SHISA5,PTEN,DENND1A,F11R,CAPG,CASP1,JDP2,CTNNB1,RXRA,HCLS1,INPP5D,NDFIP1,HOMER3,ARHGAP1,WAS,LAMP1,YWHAG,SYK,GRB2,SESN2,IST1,PYCARD,ATXN1L,MOSPD2,JAK2,AKAP5,IL1B,CTNNBIP1,CHMP2A,SYP,PRKACA,CARD16,APP,TJP2,CARD8,CHMP1A,ZNF592,YWHAB,PLAUR,ARF1,PLSCR1,MAP3K5,QKI,LBR,PINK1,SH2B2,BAK1,ACSL3,PSEN1,ELMO2,RB1,IRS2,PTPN6,GUSB,TRIM28,ARHGAP27,CTR9,DOCK4,MYD88,APAF1,DDIT3,RAD9A,SLC22A4,INSC,…
GO:MF	kinase activity	GO:0016301	FALSE	5.08E-79	78.2939	1000	3059	199	78724	MAP2K2,HK2,GSK3A,HK3,CCND3,LMTK2,RNASEL,MARK2,NEK4,SH3BP5L,AATK,MAST3,NRG1,TESC,RIPK3,PDXK,MAPK1,MAP4K4,PDK3,SRPK1,EFNA4,ITPKC,CDKN2C,MAP2K6,PRKCD,MAP3K6,ITPK1,BMP2,CSF1R,PFKFB4,YWHAG,GRK6,SYK,MAPKAPK2,PRKD2,FGR,JAK2,SRPK2,BTK,MAP3K3,CLK3,PDGFRB,PRKACA,TJP2,CLP1,IGF2R,NT5C2,BRD4,DGKG,YWHAB,LRRK1,CAMKK2,PHKG1,LTF,MAP3K5,PIK3R5,PINK1,STK4,EIF2AK2,JAK3,MLKL,STK3,IRS2,IRAK3,MOB3A,RBKS,TYK2,TRIM28,CDK…
GO:MF	ribonucleoside triphosphate phosphatase activity	GO:0017111	FALSE	6.57E-79	78.1825	1201	3059	218	78724	LAMTOR2,RIN3,RAB5C,ARL8A,RANBP3,DENND1A,SBF2,RAB32,ARAP1,TBC1D10B,SH3BP5L,RRAGD,UPF1,SIPA1,SH2D3C,RAB7A,RFC2,ARRB1,GNA15,HSPA1L,GTPBP1,ARHGAP26,NLRP3,RP2,TAP1,RAB24,RAC1,RAB13,SMPDL3A,ATP11A,RALGAPA2,TOR1A,TBC1D2,ARHGAP1,WAS,TBC1D14,VAV1,RAB3GAP2,RHOG,ITSN1,GBP6,GRB2,AGFG1,SESN2,DDX23,TDRD9,RASGEF1A,RAB10,HMGCR,GNAI2,ACAP2,FGD3,GNB2,PDGFRB,SIPA1L1,ARL2,TUFM,PREX1,TBC1D2B,RUVBL2,TBC1D10C,ARF1,ARF4…
GO:MF	cytoskeletal protein binding	GO:0008092	FALSE	3.97E-78	77.4014	1001	3059	198	78724	TWF2,ARL8A,GSK3A,LRRC61,LMTK2,CAPG,MARK2,ARPC2,KLHL2,FKBP4,TOM1,RPH3AL,DIAPH1,FLII,PSTPIP2,LCP1,FBXW11,HCLS1,MSRB2,DBN1,MAP4K4,MAP1S,DIP2B,CETN2,TMSB10,CLSTN1,TOR1A,WAS,S100A8,CEACAM1,CLIP1,REEP4,ATF5,RAB10,PYCARD,PLEKHM2,PXN,SVIL,PANX1,HAUS4,LSP1,S100A9,CORO1A,MAEA,PDLIM2,PDLIM5,NF2,NUSAP1,SLC8A1,CYFIP1,KIF3C,PDLIM7,MYO1F,KIF13A,FKBP15,SMTN,KIF13B,DCTN2,LASP1,SPAST,TNNI2,ANG,FSCN1,ACTN1,GPAA1,AR…
GO:MF	protein-macromolecule adaptor activity	GO:0030674	FALSE	5.91E-78	77.2284	1034	3059	201	78724	MAP2K2,MIER2,TRIM8,TYROBP,GAB1,KLHL2,TICAM1,CTNNB1,NRG1,FKBP4,MED16,RIPK3,AKIRIN2,ARRB1,ARRDC1,WIPI1,STX10,ARHGAP26,NLRP3,CD53,FBXW11,HCLS1,RCOR1,SLC9A1,SMARCD3,TADA2B,NCOA6,HERPUD1,GRB10,PARP10,ANKRD13D,GRB2,AP2S1,RBCK1,CREBBP,SNAP29,GNB4,FBXO45,GNB2,SAP30,TLE4,PA2G4,TJP2,CARD8,PHF13,FKBP5,SHARPIN,PCBD1,BRD4,RUVBL2,SHC1,SAP30L,COL8A2,NMNAT1,QKI,LBR,ATP1B3,IFNAR1,GNB1,MSL1,SH2B2,APH1B,NFKBIB,LAMT…
GO:MF	pyrophosphatase activity	GO:0016462	FALSE	2.76E-76	75.5591	1261	3059	220	78724	LAMTOR2,RIN3,RAB5C,ARL8A,RANBP3,DENND1A,SBF2,RAB32,ARAP1,TBC1D10B,SH3BP5L,RRAGD,UPF1,SIPA1,SH2D3C,RAB7A,RFC2,ARRB1,GNA15,HSPA1L,GTPBP1,ARHGAP26,NLRP3,RP2,TAP1,RAB24,RAC1,RAB13,SMPDL3A,ATP11A,RALGAPA2,TOR1A,TBC1D2,ARHGAP1,WAS,TBC1D14,VAV1,RAB3GAP2,RHOG,ITSN1,GBP6,GRB2,AGFG1,SESN2,DDX23,TDRD9,RASGEF1A,RAB10,HMGCR,GNAI2,ACAP2,FGD3,GNB2,PDGFRB,SIPA1L1,ARL2,TUFM,PREX1,TBC1D2B,RUVBL2,TBC1D10C,ARF1,ARF4…
GO:MF	hydrolase activity, acting on acid anhydrides	GO:0016817	FALSE	3.22E-76	75.492	1262	3059	220	78724	LAMTOR2,RIN3,RAB5C,ARL8A,RANBP3,DENND1A,SBF2,RAB32,ARAP1,TBC1D10B,SH3BP5L,RRAGD,UPF1,SIPA1,SH2D3C,RAB7A,RFC2,ARRB1,GNA15,HSPA1L,GTPBP1,ARHGAP26,NLRP3,RP2,TAP1,RAB24,RAC1,RAB13,SMPDL3A,ATP11A,RALGAPA2,TOR1A,TBC1D2,ARHGAP1,WAS,TBC1D14,VAV1,RAB3GAP2,RHOG,ITSN1,GBP6,GRB2,AGFG1,SESN2,DDX23,TDRD9,RASGEF1A,RAB10,HMGCR,GNAI2,ACAP2,FGD3,GNB2,PDGFRB,SIPA1L1,ARL2,TUFM,PREX1,TBC1D2B,RUVBL2,TBC1D10C,ARF1,ARF4…
GO:MF	hydrolase activity, acting on acid anhydrides, in phosphorus-containing anhydrides	GO:0016818	FALSE	3.22E-76	75.492	1262	3059	220	78724	LAMTOR2,RIN3,RAB5C,ARL8A,RANBP3,DENND1A,SBF2,RAB32,ARAP1,TBC1D10B,SH3BP5L,RRAGD,UPF1,SIPA1,SH2D3C,RAB7A,RFC2,ARRB1,GNA15,HSPA1L,GTPBP1,ARHGAP26,NLRP3,RP2,TAP1,RAB24,RAC1,RAB13,SMPDL3A,ATP11A,RALGAPA2,TOR1A,TBC1D2,ARHGAP1,WAS,TBC1D14,VAV1,RAB3GAP2,RHOG,ITSN1,GBP6,GRB2,AGFG1,SESN2,DDX23,TDRD9,RASGEF1A,RAB10,HMGCR,GNAI2,ACAP2,FGD3,GNB2,PDGFRB,SIPA1L1,ARL2,TUFM,PREX1,TBC1D2B,RUVBL2,TBC1D10C,ARF1,ARF4…
GO:MF	kinase binding	GO:0019900	FALSE	1.02E-73	72.9895	796	3059	172	78724	TWF2,GSK3A,CCND3,CEBPA,AP1B1,TRIM8,CASP1,TICAM1,CTNNB1,NRG1,MVP,CEACAM3,RAD23A,HCLS1,RAC1,CDKN2C,MAP2K6,PRKCD,WAS,CEACAM1,YWHAG,TBC1D14,SYK,RHOG,MAPKAPK2,CEACAM4,HDAC5,ATF5,GRB2,ANKRD2,PRKD2,TOLLIP,FGR,SLC2A1,JAK2,RNF138,MEF2A,PTPN23,PDGFRB,PRKACA,CARD16,CEBPB,APP,TJP2,TRIP6,PDLIM5,SHC1,JTB,MAP3K5,SMAD1,KIF13B,PINK1,DCTN2,SH2B2,ACSL3,ACTG1,ELMO2,PRAM1,MLKL,RB1,IRS2,IRAK3,PTPN6,RGS14,CDK5R1,DOCK4,…
GO:MF	phosphotransferase activity, alcohol group as acceptor	GO:0016773	FALSE	6.55E-72	71.1836	906	3059	181	78724	MAP2K2,HK2,GSK3A,HK3,CCND3,LMTK2,RNASEL,MARK2,NEK4,SH3BP5L,AATK,MAST3,NRG1,TESC,RIPK3,PDXK,MAPK1,MAP4K4,PDK3,SRPK1,EFNA4,ITPKC,CDKN2C,MAP2K6,PRKCD,MAP3K6,ITPK1,BMP2,CSF1R,PFKFB4,YWHAG,GRK6,SYK,MAPKAPK2,PRKD2,FGR,JAK2,SRPK2,BTK,MAP3K3,CLK3,PDGFRB,PRKACA,CLP1,IGF2R,NT5C2,BRD4,DGKG,YWHAB,LRRK1,CAMKK2,PHKG1,LTF,MAP3K5,PIK3R5,PINK1,STK4,EIF2AK2,JAK3,MLKL,STK3,IRAK3,MOB3A,RBKS,TYK2,TRIM28,CDK5R1,GMFG,S…
GO:MF	lipid binding	GO:0008289	FALSE	3.63E-70	69.4405	857	3059	174	78724	NCF1,TWF2,NSFL1C,PTEN,DENND1A,SBF2,CAPG,MARK2,ARAP1,ZFYVE1,DYSF,HS1BP3,RXRA,TOM1,S1PR4,STAR,WIPI1,ARHGAP26,NLRP3,FLII,APOL2,APOL1,SLC9A1,CAMP,RBP7,VDR,APOA1,SELL,C2CD2L,S100A8,FERMT3,EPN1,TSPO,SNX27,OSBPL5,SVIL,RNASE3,BTK,CHMP2A,SYP,BIN2,CLEC4E,SYTL3,S100A9,IGF2R,PREX1,DGKG,SMPD3,TLR2,SHC1,SAP30L,ESRRB,LTF,NR1H3,PSAP,OSBPL11,TLR1,ANXA4,HADHA,PDZD8,ANXA5,PLEKHB2,CYTH2,PRAM1,SNX32,GPAA1,CLN3,BPI,AC…
GO:MF	transmembrane transporter activity	GO:0022857	FALSE	1.04E-67	66.9839	1235	3059	206	78724	ANO10,NDUFB1,TRPC6,CACNA1E,NDUFS2,SLC16A3,TMEM63B,MFSD9,CLCN4,TIMM17B,ATP6V0E1,SLC35A2,SLCO4C1,TMEM120A,SLC36A1,ATP6V0A1,TAP1,SCLT1,SLC1A5,APOL1,SLC34A3,SLC9A1,UQCR10,SLC15A3,NDUFB4,LAMP1,CEACAM1,ORAI3,SLC7A7,NDUFA1,SLC2A1,GHITM,ATP6V1E1,PANX1,SLC22A15,PRKACA,SLC43A2,SLC27A2,SLC31A2,SLC25A22,SLC46A2,SLC24A3,SLC12A9,SLC4A8,SLC2A14,SLC8A1,LASP1,MFSD10,BAK1,PSEN1,SLC38A2,NDUFV2,NIPA2,SLC10A3,NDUFC1,…
GO:MF	signaling receptor activity	GO:0038023	FALSE	5.35E-66	65.272	2053	3059	269	78724	SEMA4D,AGTRAP,COPA,CD300C,TMEM63B,LILRA5,LILRA6,NFAM1,TNFRSF1B,OR1J4,RETN,NRG1,RXRA,EXTL3,FCN1,S1PR4,ADORA3,GPR84,JMJD6,IL17RA,GRN,HRH2,GFRA3,EFNA4,GPR17,SLC1A5,IL13RA1,VDR,PGLYRP1,SECTM1,BMP2,SEMA4A,APOA1,CSF1R,TLR7,ACKR1,LTB4R,TLR8,PTPRE,OPRD1,CCRL2,FCER1G,TNFSF18,IL10RB,TSPO,SORT1,OSCAR,CCL23,C3AR1,TLR5,IL1B,LGALS1,PDGFRB,NR6A1,PVR,CLEC4E,APP,CARD8,TNFRSF8,CSF2RA,IGF2R,OR10H2,TLR2,PLAUR,CMTM2,…
GO:MF	molecular transducer activity	GO:0060089	FALSE	5.35E-66	65.272	2053	3059	269	78724	SEMA4D,AGTRAP,COPA,CD300C,TMEM63B,LILRA5,LILRA6,NFAM1,TNFRSF1B,OR1J4,RETN,NRG1,RXRA,EXTL3,FCN1,S1PR4,ADORA3,GPR84,JMJD6,IL17RA,GRN,HRH2,GFRA3,EFNA4,GPR17,SLC1A5,IL13RA1,VDR,PGLYRP1,SECTM1,BMP2,SEMA4A,APOA1,CSF1R,TLR7,ACKR1,LTB4R,TLR8,PTPRE,OPRD1,CCRL2,FCER1G,TNFSF18,IL10RB,TSPO,SORT1,OSCAR,CCL23,C3AR1,TLR5,IL1B,LGALS1,PDGFRB,NR6A1,PVR,CLEC4E,APP,CARD8,TNFRSF8,CSF2RA,IGF2R,OR10H2,TLR2,PLAUR,CMTM2,…
GO:MF	protein dimerization activity	GO:0046983	FALSE	5.43E-66	65.265	1126	3059	194	78724	CYBA,NLRC4,TRPC6,NACC2,CEBPA,F11R,ASCL2,TFEB,TRIM8,RRAGD,TYROBP,JDP2,TESC,TP53I3,PDXK,FBXW11,S100P,TAP1,GLA,NQO2,RALGAPA2,APOA1,CSF1R,CEACAM1,TKT,FCER1G,PYCARD,CHMP4B,MEF2A,MLXIP,CISD1,NR6A1,CEBPB,HIF3A,CARD8,CORO1A,CHMP1A,NAA60,OLIG1,RUVBL2,VPS4B,HSD17B4,G6PD,PSAP,MAP3K5,GYG1,DEFA4,STK4,PADI2,BAK1,ANG,CHRAC1,ACTN1,IRAK3,NAGA,ZDHHC3,RTN4,S100A6,MXD3,GBP1,SRM,HSPB1,TPI1,DDIT3,CALCOCO2,SRGAP2,POLE4…
GO:MF	GTPase activity	GO:0003924	FALSE	2.55E-65	64.5941	796	3059	162	78724	LAMTOR2,RIN3,RAB5C,ARL8A,RANBP3,DENND1A,SBF2,RAB32,ARAP1,TBC1D10B,SH3BP5L,RRAGD,SIPA1,SH2D3C,RAB7A,ARRB1,GNA15,GTPBP1,ARHGAP26,RP2,RAB24,RAC1,RAB13,RALGAPA2,TBC1D2,ARHGAP1,WAS,TBC1D14,VAV1,RAB3GAP2,RHOG,ITSN1,GBP6,GRB2,AGFG1,SESN2,RASGEF1A,RAB10,HMGCR,GNAI2,ACAP2,FGD3,GNB2,PDGFRB,SIPA1L1,ARL2,TUFM,PREX1,TBC1D2B,TBC1D10C,ARF1,ARF4,MFN2,RGS19,GNB1,LAMTOR1,CYTH2,GMIP,SMAP2,VAV3,SBF1,ARL8B,CCZ1,RGS14…
GO:MF	protein kinase binding	GO:0019901	FALSE	1.11E-63	62.9547	717	3059	152	78724	TWF2,GSK3A,CCND3,AP1B1,TRIM8,TICAM1,CTNNB1,NRG1,MVP,CEACAM3,HCLS1,RAC1,CDKN2C,MAP2K6,PRKCD,WAS,CEACAM1,YWHAG,TBC1D14,SYK,RHOG,MAPKAPK2,CEACAM4,HDAC5,GRB2,ANKRD2,PRKD2,FGR,JAK2,RNF138,MEF2A,PTPN23,PDGFRB,PRKACA,APP,TJP2,PDLIM5,SHC1,JTB,MAP3K5,SMAD1,KIF13B,PINK1,DCTN2,SH2B2,ACSL3,ACTG1,ELMO2,PRAM1,MLKL,IRS2,IRAK3,PTPN6,RGS14,CDK5R1,DOCK4,TRAF6,HSPB1,CSK,RAD9A,NBR1,MAPK14,MFAP3,YWHAZ,DUSP3,HSP90AA1,…
GO:MF	molecular function activator activity	GO:0140677	FALSE	9.82E-63	62.0079	1177	3059	194	78724	MAP2K2,NCF1,RIN3,SEMA4D,NLRC4,RANBP3,COPA,CCND3,PTEN,MARK2,ARAP1,TBC1D10B,CASP1,SIPA1,PSENEN,RETN,MGST2,NRG1,ARRB1,JMJD6,ARHGAP26,RP2,GRN,CTSS,PRKCD,RALGAPA2,PGLYRP1,SECTM1,BMP2,SEMA4A,APOA1,TBC1D2,ARHGAP1,TBC1D14,RAB3GAP2,GM2A,AGFG1,RBCK1,TNFSF18,PYCARD,CCL23,BTK,ATP6AP1,IL1B,ACAP2,LGALS1,PDGFRB,SIPA1L1,PRKACA,PSME1,APP,CARD8,PREX1,TBC1D2B,TBC1D10C,CMTM2,ARF4,CTSA,LTF,TNFSF12,PSAP,PINK1,PSME2,AT…
GO:MF	oxidoreductase activity	GO:0016491	FALSE	1.29E-62	61.8907	759	3059	155	78724	CYBA,NCF1,NDUFB1,NDUFS2,CYB5R3,LOXL3,MGST2,MGST1,QSOX1,BLVRB,TP53I3,PGD,JMJD6,MSRA,HSD3B7,MSRB2,GPD2,IFI30,FAR2,NQO2,UQCR10,NDUFB4,MGST3,AKR1A1,MSRB3,SESN2,DHRS4,ASPH,NDUFA1,HMGCR,TBXAS1,HADHB,DEGS1,POR,PRDX6,HSD17B11,GMPR2,MTARC1,ALOXE3,PCBD1,EGLN1,PRDX1,SRXN1,DHRS7,HSD17B4,MAOA,G6PD,LBR,HADHA,PRDX5,NDUFV2,NDUFC1,MTHFD2,CBR1,KDM4A,ACADVL,KCNAB2,COX7A2,NDUFC2,PHF2,IPCEF1,IMPDH1,PIPOX,STEAP3,SRD5A…
GO:MF	protein kinase activity	GO:0004672	FALSE	7.82E-59	58.1068	786	3059	153	78724	MAP2K2,GSK3A,CCND3,LMTK2,RNASEL,MARK2,NEK4,SH3BP5L,AATK,MAST3,NRG1,TESC,RIPK3,MAPK1,MAP4K4,PDK3,SRPK1,EFNA4,CDKN2C,MAP2K6,PRKCD,MAP3K6,BMP2,CSF1R,YWHAG,GRK6,SYK,MAPKAPK2,PRKD2,FGR,JAK2,SRPK2,BTK,MAP3K3,CLK3,PDGFRB,PRKACA,IGF2R,BRD4,YWHAB,LRRK1,CAMKK2,PHKG1,LTF,MAP3K5,PINK1,STK4,EIF2AK2,JAK3,MLKL,STK3,IRAK3,MOB3A,TYK2,TRIM28,CDK5R1,GMFG,HSPB1,RAC2,CSK,MAPK14,RPS6KB2,LILRB4,BMX,PPM1D,EIF2AK1,DCLK2,…
GO:MF	acyltransferase activity	GO:0016746	FALSE	1.17E-58	57.9311	778	3059	152	78724	AGPAT2,PTEN,RNF208,ANAPC11,ZDHHC12,UBE2S,TRIM8,RNF111,AGPAT3,WWP2,RNF181,FBXO6,FBXW11,FBXO27,UBE2E3,APOA1,RNF144B,RBCK1,PCGF3,ATG3,ALAS1,CREBBP,RNF138,HADHB,NEURL3,PRDX6,MGRN1,SHARPIN,MAEA,NT5C2,NAA60,QPCT,SAT2,FBXL5,TRAF7,HADHA,RNF185,MBOAT7,DTX3L,PNPLA2,UBE2H,PLA2G15,ZDHHC3,TRIM28,SPHK1,TRAF6,TRIM25,RNF135,DGAT1,ZDHHC19,AGPAT1,BRCA1,MED18,FZR1,UBE2A,RNF31,TRIM5,TRIM69,RFFL,RNF130,ACAA1,RC3H1,PR…
GO:MF	protein homodimerization activity	GO:0042803	FALSE	1.50E-57	56.8227	731	3059	146	78724	NLRC4,TRPC6,NACC2,CEBPA,F11R,TRIM8,TYROBP,JDP2,TESC,TP53I3,PDXK,S100P,TAP1,GLA,NQO2,APOA1,CSF1R,CEACAM1,TKT,FCER1G,PYCARD,CHMP4B,CISD1,NR6A1,CEBPB,CARD8,CORO1A,CHMP1A,NAA60,RUVBL2,VPS4B,HSD17B4,G6PD,PSAP,MAP3K5,GYG1,DEFA4,STK4,PADI2,BAK1,ANG,ACTN1,IRAK3,NAGA,ZDHHC3,RTN4,S100A6,GBP1,SRM,HSPB1,TPI1,DDIT3,CALCOCO2,SRGAP2,CST7,TPST1,HSP90AA1,TPD52L2,TRIM5,GCA,EIF2AK1,TPST2,SNRPC,DPYD,SP1,CBS,RRAGA,TY…
GO:MF	sequence-specific DNA binding	GO:0043565	FALSE	3.34E-56	55.4758	1657	3059	223	78724	MAFG,NACC2,ZNF672,MTF1,CEBPA,ASCL2,ELF4,TFEB,UPF1,JDP2,RXRA,DEAF1,BCL6,NLRP3,ZNF467,SMG5,ZNF341,PLAGL1,KLF5,FOSL2,VDR,ZNF319,RFX1,ERG,HDAC5,ATF5,MAFB,POLR2A,KLF16,NACC1,NFIL3,FLI1,BACH1,MEF2A,SPI1,MLXIP,BATF,NR6A1,CEBPB,KLF2,APP,ZNF787,HIF3A,ZNF697,ZNF552,BRD4,ZBTB45,OLIG1,RUVBL2,ZGLP1,ESRRB,NR1H3,ZNF566,HLX,SMAD1,CUX1,PRDX5,SAFB,IRF1,RB1,ZNF646,MXD3,CEBPD,DDIT3,TBL1X,SNAPC4,BRCA1,ZNF516,PPARG,MB…
GO:MF	double-stranded DNA binding	GO:0003690	FALSE	2.27E-54	53.6433	1644	3059	219	78724	MAFG,NACC2,MTF1,CEBPA,ASCL2,ELF4,TFEB,JDP2,RXRA,DEAF1,BCL6,ZNF467,ZNF341,PLAGL1,KLF5,FOSL2,VDR,ZNF319,RFX1,ERG,HDAC5,ATF5,MAFB,POLR2A,KLF16,NACC1,NFIL3,FLI1,BACH1,MEF2A,SPI1,MLXIP,BATF,NR6A1,CEBPB,KLF2,APP,ZNF787,HIF3A,ZNF697,ZNF552,BRD4,ZBTB45,OLIG1,MSH6,ZCCHC3,RUVBL2,ESRRB,NR1H3,ZNF566,SMAD1,CUX1,PRDX5,SAFB,IRF1,RB1,ZNF646,MXD3,CEBPD,DDIT3,TBL1X,SNAPC4,BRCA1,ZNF516,PPARG,MBD1,FOXN2,E2F3,ZNF581,…
GO:MF	hydrolase activity, acting on ester bonds	GO:0016788	FALSE	4.60E-51	50.3371	918	3059	155	78724	CES1,RNASE2,LMTK2,PTEN,SBF2,RNASEL,TESC,RNASEK,INPP5D,APMAP,SMPDL3A,DNASE2,DUSP23,ISG20,BMP2,PFKFB4,PTPRE,GM2A,LIPA,LYPLA2,UBASH3B,PPP1R3D,MTMR3,RNASE3,BTK,GNS,PTPN23,GALNS,PDGFRB,PRDX6,PPP1R15B,ARSD,AOAH,NT5C2,STYXL1,SMPD3,PPP4R1,ARF4,PLSCR1,PPP1R7,ACOT8,UBLCP1,ARSB,ANXA4,EXOSC4,ANXA5,ANG,NCEH1,EIF2AK2,PPP1R10,FIG4,SBF1,PTPN6,PNPLA2,PLA2G15,PGLS,CTDSP1,CEL,RAD9A,MRPL44,PTPN12,ABHD3,DUSP3,XRN1,CN…
GO:MF	transition metal ion binding	GO:0046914	FALSE	5.18E-51	50.2853	1141	3059	174	78724	ANAPC11,S100A12,NEK4,LOXL3,TRIM8,ZFYVE1,UPF1,RXRA,JMJD6,PDXK,RNPEPL1,S100P,MSRB2,NQO2,SMPDL3A,VDR,PGLYRP1,TIMP2,TADA2B,S100A8,CLIP1,MSRB3,RNF144B,CREBBP,TBXAS1,MMP8,LCN2,NR6A1,SETDB1,PRKACA,APP,MTARC1,S100A9,ALOXE3,CHMP1A,MT1F,EGLN1,QPCT,ZCCHC3,SAP30L,ZGLP1,PLSCR1,ESRRB,LTF,NR1H3,TES,FBXL5,GYG1,TRAF7,DHH,ANG,MGAT1,MEP1A,DYTN,KDM4A,PLA2G15,CPXM2,TRIM28,S100A6,TRAF6,PHF2,BLVRA,NBR1,BRCA1,RNPEP,RNF3…
GO:MF	transcription cis-regulatory region binding	GO:0000976	FALSE	8.70E-51	50.0604	1485	3059	201	78724	MAFG,NACC2,MTF1,CEBPA,ASCL2,ELF4,TFEB,JDP2,RXRA,DEAF1,BCL6,ZNF467,ZNF341,PLAGL1,KLF5,FOSL2,VDR,ZNF319,RFX1,ERG,HDAC5,ATF5,MAFB,POLR2A,KLF16,NACC1,NFIL3,FLI1,BACH1,MEF2A,SPI1,MLXIP,BATF,NR6A1,CEBPB,KLF2,APP,HIF3A,ZNF697,ZNF552,BRD4,ZBTB45,OLIG1,RUVBL2,ESRRB,NR1H3,ZNF566,SMAD1,CUX1,PRDX5,SAFB,IRF1,RB1,ZNF646,MXD3,CEBPD,DDIT3,TBL1X,SNAPC4,BRCA1,ZNF516,PPARG,FOXN2,E2F3,ZNF581,NCOA2,HIF1A,SP1,CEBPE,CA…
GO:MF	transcription regulatory region nucleic acid binding	GO:0001067	FALSE	9.69E-51	50.0136	1486	3059	201	78724	MAFG,NACC2,MTF1,CEBPA,ASCL2,ELF4,TFEB,JDP2,RXRA,DEAF1,BCL6,ZNF467,ZNF341,PLAGL1,KLF5,FOSL2,VDR,ZNF319,RFX1,ERG,HDAC5,ATF5,MAFB,POLR2A,KLF16,NACC1,NFIL3,FLI1,BACH1,MEF2A,SPI1,MLXIP,BATF,NR6A1,CEBPB,KLF2,APP,HIF3A,ZNF697,ZNF552,BRD4,ZBTB45,OLIG1,RUVBL2,ESRRB,NR1H3,ZNF566,SMAD1,CUX1,PRDX5,SAFB,IRF1,RB1,ZNF646,MXD3,CEBPD,DDIT3,TBL1X,SNAPC4,BRCA1,ZNF516,PPARG,FOXN2,E2F3,ZNF581,NCOA2,HIF1A,SP1,CEBPE,CA…
GO:MF	sequence-specific double-stranded DNA binding	GO:1990837	FALSE	2.37E-50	49.6245	1547	3059	205	78724	MAFG,NACC2,MTF1,CEBPA,ASCL2,ELF4,TFEB,JDP2,RXRA,DEAF1,BCL6,ZNF467,ZNF341,PLAGL1,KLF5,FOSL2,VDR,ZNF319,RFX1,ERG,HDAC5,ATF5,MAFB,POLR2A,KLF16,NACC1,NFIL3,FLI1,BACH1,MEF2A,SPI1,MLXIP,BATF,NR6A1,CEBPB,KLF2,APP,ZNF787,HIF3A,ZNF697,ZNF552,BRD4,ZBTB45,OLIG1,RUVBL2,ESRRB,NR1H3,ZNF566,SMAD1,CUX1,PRDX5,SAFB,IRF1,RB1,ZNF646,MXD3,CEBPD,DDIT3,TBL1X,SNAPC4,BRCA1,ZNF516,PPARG,FOXN2,E2F3,ZNF581,NCOA2,HIF1A,SP1,C…
GO:MF	enzyme activator activity	GO:0008047	FALSE	4.84E-47	46.3152	610	3059	121	78724	MAP2K2,NCF1,RIN3,NLRC4,RANBP3,CCND3,PTEN,MARK2,ARAP1,TBC1D10B,CASP1,SIPA1,PSENEN,MGST2,NRG1,ARRB1,ARHGAP26,RP2,CTSS,PRKCD,RALGAPA2,BMP2,APOA1,TBC1D2,ARHGAP1,TBC1D14,RAB3GAP2,GM2A,AGFG1,RBCK1,PYCARD,BTK,ACAP2,PDGFRB,SIPA1L1,PSME1,CARD8,PREX1,TBC1D2B,TBC1D10C,ARF4,CTSA,LTF,PSAP,PINK1,PSME2,STK4,APH1B,GMIP,SMAP2,VAV3,STK3,MOB3A,RGS14,CDK5R1,GMFG,ARHGAP27,DOCK4,APAF1,SRGAP2,FZR1,CXCL1,RANGAP1,RAP1GAP…
GO:MF	monoatomic ion transmembrane transporter activity	GO:0015075	FALSE	2.42E-46	45.616	868	3059	144	78724	ANO10,NDUFB1,TRPC6,CACNA1E,NDUFS2,SLC16A3,TMEM63B,CLCN4,ATP6V0E1,TMEM120A,SLC36A1,ATP6V0A1,SCLT1,APOL1,SLC34A3,SLC9A1,UQCR10,SLC15A3,NDUFB4,LAMP1,ORAI3,NDUFA1,GHITM,ATP6V1E1,PANX1,SLC31A2,SLC25A22,SLC24A3,SLC12A9,SLC4A8,SLC8A1,LASP1,PSEN1,SLC38A2,NDUFV2,NIPA2,SLC10A3,NDUFC1,SLC19A1,P2RX1,KCNAB2,KCNJ15,SFXN5,S100A6,NDUFC2,SLC15A4,ATP6V0D1,SLC9A8,CNNM4,CACNG8,SLC39A1,SLC26A8,SLC40A1,KCNJ2,SLC30A1,S…
GO:MF	cis-regulatory region sequence-specific DNA binding	GO:0000987	FALSE	2.88E-46	45.5407	1206	3059	172	78724	MAFG,NACC2,MTF1,CEBPA,ASCL2,ELF4,TFEB,JDP2,RXRA,BCL6,ZNF467,ZNF341,PLAGL1,KLF5,FOSL2,VDR,ZNF319,RFX1,ERG,HDAC5,MAFB,KLF16,NACC1,NFIL3,FLI1,BACH1,MEF2A,SPI1,MLXIP,BATF,NR6A1,CEBPB,KLF2,APP,HIF3A,ZNF697,ZNF552,ZBTB45,OLIG1,RUVBL2,ESRRB,NR1H3,SMAD1,SAFB,IRF1,ZNF646,MXD3,CEBPD,DDIT3,SNAPC4,ZNF516,PPARG,FOXN2,E2F3,ZNF581,NCOA2,HIF1A,SP1,CEBPE,ZNF446,STAT5A,SOX1,EPAS1,SNAI3,STK16,GFI1B,STAT2,ZNF746,TAR…
GO:MF	active transmembrane transporter activity	GO:0022804	FALSE	5.82E-46	45.235	458	3059	104	78724	NDUFB1,NDUFS2,SLC16A3,CLCN4,ATP6V0E1,SLC35A2,SLCO4C1,SLC36A1,ATP6V0A1,TAP1,SLC1A5,SLC34A3,SLC9A1,UQCR10,SLC15A3,NDUFB4,NDUFA1,GHITM,ATP6V1E1,SLC25A22,SLC46A2,SLC24A3,SLC12A9,SLC4A8,SLC8A1,SLC38A2,NDUFV2,SLC10A3,NDUFC1,ABCC6,SLC19A1,NDUFC2,ABCA13,SLC15A4,ATP6V0D1,SLC22A4,SLC9A8,SLC26A8,SLC30A1,SLC25A3,SLC1A7,COX5A,ATP6V0C,SLC12A6,SLC5A9,TCIRG1,COX6B1,SLC25A11,SLC44A1,CLCN7,SLC2A9,SLC17A5,ABCB6,ABC…
GO:MF	RNA polymerase II transcription regulatory region sequence-specific DNA binding	GO:0000977	FALSE	1.29E-45	44.8878	1387	3059	185	78724	MAFG,NACC2,MTF1,CEBPA,ASCL2,ELF4,TFEB,JDP2,RXRA,DEAF1,BCL6,ZNF467,ZNF341,PLAGL1,KLF5,FOSL2,VDR,ZNF319,RFX1,ERG,HDAC5,ATF5,MAFB,KLF16,NACC1,NFIL3,FLI1,BACH1,MEF2A,SPI1,MLXIP,BATF,NR6A1,CEBPB,KLF2,APP,HIF3A,ZNF697,ZNF552,ZBTB45,OLIG1,RUVBL2,ESRRB,NR1H3,ZNF566,SMAD1,CUX1,SAFB,IRF1,RB1,ZNF646,MXD3,CEBPD,DDIT3,SNAPC4,ZNF516,PPARG,E2F3,ZNF581,NCOA2,HIF1A,SP1,CEBPE,CASZ1,ZNF446,STAT5A,SOX1,EPAS1,SNAI3,S…
GO:MF	DNA-binding transcription factor activity	GO:0003700	FALSE	2.98E-45	44.5255	1448	3059	189	78724	MAFG,NACC2,ZNF672,MTF1,CEBPA,ASCL2,ELF4,TFEB,JDP2,RXRA,DEAF1,BCL6,TSHZ3,ZNF467,ZNF341,PLAGL1,KLF5,FOSL2,VDR,ZNF319,RFX1,ERG,ATF5,MAFB,KLF16,NACC1,NFIL3,FLI1,BACH1,MEF2A,SPI1,MLXIP,BATF,NR6A1,CEBPB,KLF2,ZNF787,HIF3A,ZNF697,ZNF552,ZNF592,ZBTB45,OLIG1,ZBTB47,ZGLP1,PLSCR1,ESRRB,NR1H3,ZNF566,HLX,SMAD1,CUX1,IRF1,ZNF646,MXD3,CEBPD,DDIT3,ZNF687,BRCA1,ZNF516,PPARG,FOXN2,E2F3,ZNF581,HIF1A,ABHD2,SP1,CEBPE,C…
GO:MF	ubiquitin-like protein ligase binding	GO:0044389	FALSE	1.75E-44	43.7571	324	3059	87	78724	LAPTM5,NDUFS2,TNFRSF1B,CTNNB1,ARRB1,ARRDC1,HSPA1L,SMG5,UBA52,UBASH3B,TOLLIP,PRDX6,PRKACA,PA2G4,CEBPB,PDLIM2,EIF4E2,MFN2,SMAD1,PINK1,ACTG1,UBB,PARP9,DTX3L,RB1,KDM4A,ERLIN1,RTN4,TRIM28,TPI1,UBC,BRCA1,RANGAP1,UBE2A,YWHAZ,RNF31,HSP90AA1,TNFRSF14,GABARAP,RFFL,ATP6V0C,USP25,HIF1A,LTBR,CXCR4,CBS,RRAGA,MUL1,HM13,LYN,STAT2,HSPA6,ZNF746,TGFBR1,PAX6,HSPA1A,UBE2J2,BID,SQSTM1,TUBA1B,PCBP2,PIAS4,UBE2L3,NEDD8,T…
GO:MF	RNA polymerase II cis-regulatory region sequence-specific DNA binding	GO:0000978	FALSE	2.95E-44	43.5296	1183	3059	167	78724	MAFG,NACC2,MTF1,CEBPA,ASCL2,ELF4,TFEB,JDP2,RXRA,BCL6,ZNF467,ZNF341,PLAGL1,KLF5,FOSL2,VDR,ZNF319,RFX1,ERG,HDAC5,MAFB,KLF16,NACC1,NFIL3,FLI1,BACH1,MEF2A,SPI1,MLXIP,BATF,NR6A1,CEBPB,KLF2,APP,HIF3A,ZNF697,ZNF552,ZBTB45,OLIG1,RUVBL2,ESRRB,NR1H3,SMAD1,SAFB,IRF1,ZNF646,MXD3,CEBPD,DDIT3,SNAPC4,ZNF516,PPARG,E2F3,ZNF581,NCOA2,HIF1A,SP1,CEBPE,ZNF446,STAT5A,SOX1,EPAS1,SNAI3,STK16,GFI1B,STAT2,ZNF746,TARDBP,FO…
GO:MF	inorganic molecular entity transmembrane transporter activity	GO:0015318	FALSE	6.35E-44	43.1974	827	3059	137	78724	ANO10,NDUFB1,TRPC6,CACNA1E,NDUFS2,SLC16A3,TMEM63B,CLCN4,ATP6V0E1,SLC36A1,ATP6V0A1,SCLT1,APOL1,SLC34A3,SLC9A1,UQCR10,SLC15A3,NDUFB4,ORAI3,NDUFA1,GHITM,ATP6V1E1,PANX1,SLC31A2,SLC25A22,SLC24A3,SLC12A9,SLC4A8,SLC8A1,PSEN1,SLC38A2,NDUFV2,NIPA2,SLC10A3,NDUFC1,ABCC6,P2RX1,KCNAB2,KCNJ15,NDUFC2,SLC15A4,ATP6V0D1,SLC9A8,CNNM4,CACNG8,SLC39A1,SLC26A8,SLC40A1,KCNJ2,SLC30A1,SLC25A3,SLC1A7,COX5A,ATP6V0C,PKD1,SLC…
GO:MF	guanyl ribonucleotide binding	GO:0032561	FALSE	3.69E-43	42.4325	651	3059	120	78724	LAMTOR2,RIN3,RAB5C,ARL8A,DENND1A,SBF2,RAB32,SH3BP5L,RRAGD,SH2D3C,FKBP4,RAB7A,GNA15,GTPBP1,RP2,RAB24,RAC1,RAB13,VAV1,RAB3GAP2,RHOG,ITSN1,GBP6,SESN2,RASGEF1A,RAB10,GNAI2,FGD3,ARL2,TUFM,PREX1,LRRK1,ARF1,ARF4,EHD4,MFN2,LAMTOR1,CYTH2,VAV3,SBF1,ARL8B,CCZ1,SLC19A1,RGS14,DENND5A,GBP1,DOCK4,EPS8L1,RAC2,EHD1,RHOB,HSP90AA1,NUCB1,DAP3,FGD4,RAN,EIF2B5,RAB21,RAB35,IQSEC1,AKAP13,DENND2A,RRAGA,RRAD,DENND3,GPN3,T…
GO:MF	guanyl nucleotide binding	GO:0019001	FALSE	3.69E-43	42.4325	651	3059	120	78724	LAMTOR2,RIN3,RAB5C,ARL8A,DENND1A,SBF2,RAB32,SH3BP5L,RRAGD,SH2D3C,FKBP4,RAB7A,GNA15,GTPBP1,RP2,RAB24,RAC1,RAB13,VAV1,RAB3GAP2,RHOG,ITSN1,GBP6,SESN2,RASGEF1A,RAB10,GNAI2,FGD3,ARL2,TUFM,PREX1,LRRK1,ARF1,ARF4,EHD4,MFN2,LAMTOR1,CYTH2,VAV3,SBF1,ARL8B,CCZ1,SLC19A1,RGS14,DENND5A,GBP1,DOCK4,EPS8L1,RAC2,EHD1,RHOB,HSP90AA1,NUCB1,DAP3,FGD4,RAN,EIF2B5,RAB21,RAB35,IQSEC1,AKAP13,DENND2A,RRAGA,RRAD,DENND3,GPN3,T…
GO:MF	GTPase regulator activity	GO:0030695	FALSE	4.15E-43	42.3824	499	3059	105	78724	LAMTOR2,RIN3,RANBP3,DENND1A,SBF2,ARAP1,TBC1D10B,SH3BP5L,SIPA1,SH2D3C,ARRB1,ARHGAP26,RP2,RALGAPA2,TBC1D2,ARHGAP1,WAS,TBC1D14,VAV1,RAB3GAP2,ITSN1,GRB2,AGFG1,SESN2,RASGEF1A,HMGCR,ACAP2,FGD3,PDGFRB,SIPA1L1,PREX1,TBC1D2B,TBC1D10C,ARF4,LAMTOR1,CYTH2,GMIP,SMAP2,VAV3,SBF1,CCZ1,RGS14,DENND5A,ARHGAP27,DOCK4,EPS8L1,SRGAP2,RANGAP1,RAP1GAP2,NUCB1,MYO9B,FGD4,BNIP2,ALDH1A1,GPS2,EIF2B5,ARFGAP2,IQSEC1,AKAP13,TBC1…
GO:MF	nucleoside-triphosphatase regulator activity	GO:0060589	FALSE	4.15E-43	42.3824	499	3059	105	78724	LAMTOR2,RIN3,RANBP3,DENND1A,SBF2,ARAP1,TBC1D10B,SH3BP5L,SIPA1,SH2D3C,ARRB1,ARHGAP26,RP2,RALGAPA2,TBC1D2,ARHGAP1,WAS,TBC1D14,VAV1,RAB3GAP2,ITSN1,GRB2,AGFG1,SESN2,RASGEF1A,HMGCR,ACAP2,FGD3,PDGFRB,SIPA1L1,PREX1,TBC1D2B,TBC1D10C,ARF4,LAMTOR1,CYTH2,GMIP,SMAP2,VAV3,SBF1,CCZ1,RGS14,DENND5A,ARHGAP27,DOCK4,EPS8L1,SRGAP2,RANGAP1,RAP1GAP2,NUCB1,MYO9B,FGD4,BNIP2,ALDH1A1,GPS2,EIF2B5,ARFGAP2,IQSEC1,AKAP13,TBC1…
GO:MF	ubiquitin protein ligase binding	GO:0031625	FALSE	9.65E-43	42.0156	306	3059	83	78724	LAPTM5,NDUFS2,TNFRSF1B,CTNNB1,ARRB1,ARRDC1,HSPA1L,SMG5,UBA52,UBASH3B,TOLLIP,PRDX6,PRKACA,PA2G4,PDLIM2,EIF4E2,MFN2,SMAD1,PINK1,ACTG1,UBB,RB1,KDM4A,ERLIN1,RTN4,TRIM28,TPI1,UBC,BRCA1,RANGAP1,UBE2A,YWHAZ,RNF31,HSP90AA1,TNFRSF14,GABARAP,RFFL,ATP6V0C,USP25,HIF1A,LTBR,CXCR4,CBS,RRAGA,MUL1,HM13,LYN,HSPA6,ZNF746,TGFBR1,PAX6,HSPA1A,UBE2J2,BID,SQSTM1,TUBA1B,PCBP2,PIAS4,UBE2L3,NEDD8,TSG101,FBXW7,MDM2,CUL7,SH…
GO:MF	protein serine/threonine kinase activity	GO:0004674	FALSE	2.03E-42	41.6919	557	3059	110	78724	MAP2K2,GSK3A,CCND3,LMTK2,MARK2,NEK4,AATK,MAST3,RIPK3,MAPK1,MAP4K4,PDK3,SRPK1,CDKN2C,MAP2K6,PRKCD,MAP3K6,BMP2,YWHAG,GRK6,SYK,MAPKAPK2,PRKD2,SRPK2,MAP3K3,CLK3,PRKACA,BRD4,LRRK1,CAMKK2,PHKG1,LTF,MAP3K5,PINK1,STK4,EIF2AK2,STK3,IRAK3,CDK5R1,HSPB1,MAPK14,RPS6KB2,PPM1D,EIF2AK1,DCLK2,PDK4,CCNI,MAP2K1,STK16,HIPK1,PDPK1,TGFBR1,MAP3K11,MAPKAPK3,DAPK3,PHKA2,CALM3,MAPK7,OXSR1,ATG13,CSNK1G2,PIK3CG,MAP3K10,LIMK…
GO:MF	actin binding	GO:0003779	FALSE	3.05E-42	41.5162	442	3059	98	78724	TWF2,CAPG,ARPC2,KLHL2,DIAPH1,FLII,PSTPIP2,LCP1,HCLS1,MSRB2,DBN1,MAP1S,TMSB10,WAS,CEACAM1,SVIL,PANX1,LSP1,CORO1A,MAEA,PDLIM2,PDLIM5,NF2,CYFIP1,PDLIM7,MYO1F,FKBP15,SMTN,LASP1,TNNI2,ANG,FSCN1,ACTN1,ARPC1A,CAP1,CDK5R1,GMFG,GBP1,VPS16,EPS8L1,WDR1,ACTR2,MSN,P4HB,ALDOA,CORO2A,MYO9B,MYO7A,FGD4,CXCR4,CORO7,VASP,SPTB,PICK1,SSH1,MOBP,TMSB4X,MYL3,GSN,SYN1,PSTPIP1,PXK,CAPZB,CORO1B,CLMN,MEFV,MYO7B,CNN2,ACTR3,W…
GO:MF	inorganic cation transmembrane transporter activity	GO:0022890	FALSE	7.21E-42	41.142	702	3059	123	78724	NDUFB1,TRPC6,CACNA1E,NDUFS2,SLC16A3,TMEM63B,ATP6V0E1,SLC36A1,ATP6V0A1,SCLT1,SLC34A3,SLC9A1,UQCR10,SLC15A3,NDUFB4,ORAI3,NDUFA1,GHITM,ATP6V1E1,PANX1,SLC31A2,SLC25A22,SLC24A3,SLC12A9,SLC4A8,SLC8A1,PSEN1,SLC38A2,NDUFV2,NIPA2,SLC10A3,NDUFC1,P2RX1,KCNAB2,KCNJ15,NDUFC2,SLC15A4,ATP6V0D1,SLC9A8,CNNM4,CACNG8,SLC39A1,SLC40A1,KCNJ2,SLC30A1,SLC25A3,SLC1A7,COX5A,ATP6V0C,PKD1,SLC12A6,SLC5A9,TCIRG1,COX6B1,KCNE1,…
GO:MF	monoatomic cation transmembrane transporter activity	GO:0008324	FALSE	1.71E-41	40.7671	741	3059	126	78724	ANO10,NDUFB1,TRPC6,CACNA1E,NDUFS2,SLC16A3,TMEM63B,ATP6V0E1,SLC36A1,ATP6V0A1,SCLT1,SLC34A3,SLC9A1,UQCR10,SLC15A3,NDUFB4,ORAI3,NDUFA1,GHITM,ATP6V1E1,PANX1,SLC31A2,SLC25A22,SLC24A3,SLC12A9,SLC4A8,SLC8A1,PSEN1,SLC38A2,NDUFV2,NIPA2,SLC10A3,NDUFC1,P2RX1,KCNAB2,KCNJ15,NDUFC2,SLC15A4,ATP6V0D1,SLC9A8,CNNM4,CACNG8,SLC39A1,SLC40A1,KCNJ2,SLC30A1,SLC25A3,SLC1A7,COX5A,ATP6V0C,PKD1,SLC12A6,SLC5A9,TCIRG1,COX6B1,…
GO:MF	peptidase activity	GO:0008233	FALSE	8.03E-41	40.0952	832	3059	133	78724	CTSD,NLRC4,CTSB,CAPNS2,ASPRV1,CASP1,PSENEN,HTRA3,RNPEPL1,CTSS,F12,TIMP2,HP,MPND,PYCARD,PCSK5,SERPINA1,MMP8,PRSS57,SERPINB8,PSME1,CARD16,APP,CARD8,SPINT1,CHMP1A,CTSA,LTF,SCPEP1,PINK1,PSME2,SLPI,PRSS41,PSEN1,APH1B,DHH,VCPIP1,MEP1A,GPAA1,C1RL,CPXM2,APAF1,RHBDL2,CST7,RNPEP,PRSS58,SERPINB6,NAIP,TFPI,HPR,PI3,USP25,NPEPL1,CAPN5,CSTA,DPP3,NUP98,CASP9,USP10,RHBDL1,GAPDH,MMP9,SORL1,ECE2,HM13,VSIR,NLRP12,AT…
GO:MF	cell adhesion molecule binding	GO:0050839	FALSE	2.71E-40	39.5675	564	3059	108	78724	TWF2,F11R,CAPG,MARK2,EXOC3,CTNNB1,NRG1,LCP1,S100P,DBN1,PLIN3,TBC1D2,ARHGAP1,SYK,LYPLA2,IST1,CD151,FERMT3,RAB10,IL1B,CHMP4B,PCMT1,PRDX6,PVR,TJP2,YWHAB,PDLIM5,NF2,PRDX1,TGFBI,EHD4,TES,LASP1,PSEN1,FSCN1,ACTN1,PTPN6,NDRG1,RTN4,CDK5R1,EPS8L1,TRIM25,EHD1,RANGAP1,YWHAZ,ICAM3,MSN,ARVCF,OLFM4,BSG,P4HB,ALDOA,SLC14A2,PTPRF,PACSIN2,ITGB2,RAN,VASP,SCYL1,TSPAN4,ZC3HAV1,MAPRE1,NPTN,LYN,CRKL,IDH1,LDHA,CBL,HNRNPK…
GO:MF	DNA-binding transcription factor activity, RNA polymerase II-specific	GO:0000981	FALSE	9.97E-40	39.0012	1360	3059	173	78724	MAFG,NACC2,ZNF672,MTF1,CEBPA,ASCL2,ELF4,TFEB,JDP2,RXRA,DEAF1,BCL6,TSHZ3,ZNF467,ZNF341,PLAGL1,KLF5,FOSL2,VDR,ZNF319,RFX1,ERG,ATF5,MAFB,KLF16,NACC1,NFIL3,FLI1,BACH1,MEF2A,SPI1,MLXIP,BATF,NR6A1,CEBPB,KLF2,ZNF787,HIF3A,ZNF697,ZNF552,ZBTB45,OLIG1,ZBTB47,ZGLP1,PLSCR1,ESRRB,NR1H3,ZNF566,HLX,SMAD1,CUX1,IRF1,ZNF646,MXD3,CEBPD,DDIT3,ZNF516,PPARG,FOXN2,E2F3,HIF1A,ABHD2,SP1,CEBPE,CASZ1,ZNF446,STAT5A,ZNF438,S…
GO:MF	GTP binding	GO:0005525	FALSE	1.03E-39	38.9875	614	3059	112	78724	LAMTOR2,RIN3,RAB5C,ARL8A,DENND1A,SBF2,RAB32,SH3BP5L,RRAGD,SH2D3C,FKBP4,RAB7A,GNA15,GTPBP1,RP2,RAB24,RAC1,RAB13,VAV1,RAB3GAP2,RHOG,ITSN1,GBP6,RASGEF1A,RAB10,GNAI2,FGD3,ARL2,TUFM,PREX1,LRRK1,ARF1,ARF4,EHD4,MFN2,LAMTOR1,CYTH2,VAV3,SBF1,ARL8B,CCZ1,DENND5A,GBP1,DOCK4,EPS8L1,RAC2,EHD1,RHOB,HSP90AA1,NUCB1,DAP3,FGD4,RAN,EIF2B5,RAB21,RAB35,IQSEC1,AKAP13,DENND2A,RRAGA,RRAD,DENND3,GPN3,TIAM2,TUBA4A,ARHGEF5,…
GO:MF	aminoacyltransferase activity	GO:0016755	FALSE	1.62E-39	38.7915	533	3059	104	78724	PTEN,RNF208,ANAPC11,UBE2S,TRIM8,RNF111,WWP2,RNF181,FBXO6,FBXW11,FBXO27,UBE2E3,RNF144B,RBCK1,PCGF3,ATG3,RNF138,NEURL3,MGRN1,SHARPIN,MAEA,NT5C2,QPCT,FBXL5,TRAF7,RNF185,DTX3L,UBE2H,TRIM28,TRAF6,TRIM25,RNF135,BRCA1,MED18,FZR1,UBE2A,RNF31,TRIM5,TRIM69,RFFL,RNF130,RC3H1,PRPF19,RNF146,RNF167,UBR4,TGM3,MKRN1,MUL1,SIAH2,RNF113A,CBL,UBR2,UFC1,HDAC4,GGT1,TRIM34,WDSUB1,UBE2J2,TRIM41,MIB1,ZMIZ1,ZNF598,MEFV,PI…
GO:MF	ubiquitin-like protein transferase activity	GO:0019787	FALSE	1.55E-38	37.8111	515	3059	101	78724	PTEN,RNF208,ANAPC11,UBE2S,TRIM8,RNF111,WWP2,RNF181,FBXO6,FBXW11,FBXO27,UBE2E3,RNF144B,RBCK1,PCGF3,ATG3,RNF138,NEURL3,MGRN1,SHARPIN,MAEA,NT5C2,FBXL5,TRAF7,RNF185,DTX3L,UBE2H,TRIM28,TRAF6,TRIM25,RNF135,BRCA1,MED18,FZR1,UBE2A,RNF31,TRIM5,TRIM69,RFFL,RNF130,RC3H1,PRPF19,RNF146,RNF167,UBR4,MKRN1,MUL1,SIAH2,RNF113A,CBL,UBR2,UFC1,HDAC4,TRIM34,WDSUB1,UBE2J2,TRIM41,MIB1,ZMIZ1,ZNF598,MEFV,PIAS4,UBE2L3,RNF1…
GO:MF	transcription factor binding	GO:0008134	FALSE	9.45E-38	37.0248	599	3059	108	78724	CEBPA,ASCL2,CTNNB1,RXRA,FKBP4,WWP2,MED16,BCL6,WIPI1,NLRP3,HCLS1,KLF5,VDR,SMARCD3,NCOA6,PARP10,HDAC5,ANKRD2,CREBBP,MEF2A,SPI1,TLE4,TRIP6,RUVBL2,ESRRB,STK4,ANXA4,PADI2,PARP9,DTX3L,RB1,HSPB1,HIRA,DDIT3,MAPK14,TADA3,ASAH1,ZNF516,YWHAZ,NCOR2,SUFU,PPARG,LMO2,NCOA2,CRTC2,HIF1A,FBP1,BEX1,SP1,TCP10L,STAT5A,LCOR,CTBP2,FAM89B,MED4,EPAS1,CGGBP1,GFI1B,FOXO3,CRKL,DAPK3,PAX6,ATOH8,MAX,HDAC4,PSMC5,RBBP8,CTDP1,TH…
GO:MF	calcium ion binding	GO:0005509	FALSE	2.87E-37	36.5423	729	3059	119	78724	CAPNS2,CACNA1E,S100A12,PCDH1,DYSF,TESC,LCP1,CRACR2B,S100P,REPS2,GPD2,F12,CETN2,CLSTN1,HPCAL1,SELL,S100A8,TKT,ITSN1,ASPH,MCTP1,MAN1A1,EFHD1,CLEC4E,S100A9,AOAH,DGKG,CAMKK2,EHD4,PLSCR1,SLC8A1,MCTP2,ANXA4,PADI2,DHH,ANXA5,ACTN1,SUSD1,CDK5R1,S100A6,EHD1,FKBP9,ANXA11,PITPNM1,NUCB1,GCA,FSTL1,MMRN1,BNIP2,CLEC3B,TGM3,PADI4,LPCAT2,GALNT3,EFEMP2,PLA2G4A,MYL3,GSN,CBL,CALM3,PCDHB9,CLEC4A,ANXA2,JAG1,DSC2,PPP2R3…
GO:MF	ubiquitin-protein transferase activity	GO:0004842	FALSE	4.12E-36	35.3848	485	3059	95	78724	PTEN,RNF208,ANAPC11,UBE2S,TRIM8,RNF111,WWP2,RNF181,FBXO6,FBXW11,FBXO27,UBE2E3,RNF144B,RBCK1,PCGF3,RNF138,NEURL3,MGRN1,SHARPIN,MAEA,NT5C2,FBXL5,TRAF7,RNF185,DTX3L,UBE2H,TRIM28,TRAF6,TRIM25,RNF135,BRCA1,MED18,FZR1,UBE2A,RNF31,TRIM5,TRIM69,RFFL,RNF130,RC3H1,PRPF19,RNF146,RNF167,UBR4,MKRN1,MUL1,SIAH2,RNF113A,CBL,UBR2,TRIM34,WDSUB1,UBE2J2,TRIM41,MIB1,ZNF598,MEFV,UBE2L3,RNF10,MED8,RNF122,FBXW7,CDC34,FB…
GO:MF	zinc ion binding	GO:0008270	FALSE	7.78E-36	35.1092	861	3059	128	78724	ANAPC11,S100A12,TRIM8,ZFYVE1,UPF1,RXRA,PDXK,RNPEPL1,MSRB2,NQO2,SMPDL3A,VDR,PGLYRP1,TIMP2,TADA2B,S100A8,CLIP1,MSRB3,RNF144B,CREBBP,MMP8,NR6A1,SETDB1,S100A9,CHMP1A,MT1F,QPCT,ZCCHC3,SAP30L,ZGLP1,PLSCR1,ESRRB,NR1H3,TES,TRAF7,DHH,MEP1A,DYTN,KDM4A,PLA2G15,CPXM2,TRIM28,S100A6,TRAF6,PHF2,BLVRA,NBR1,BRCA1,RNPEP,RNF31,PPARG,TRIM5,MBD1,D2HGDH,CNBP,SNRPC,ZNF385A,NANOS3,RC3H1,DPP3,RNF146,RNF167,UBR4,MMP9,CDA,…
GO:MF	transcription coregulator activity	GO:0003712	FALSE	7.31E-35	34.136	491	3059	94	78724	MIER2,TRIM8,CTNNB1,NRG1,MED16,RIPK3,AKIRIN2,ARRB1,RCOR1,SMARCD3,TADA2B,NCOA6,PARP10,RBCK1,CREBBP,SAP30,TLE4,PA2G4,PCBD1,BRD4,RUVBL2,SAP30L,QKI,NFKBIB,PARP9,ACSS2,RB1,TRIM28,CD274,PHF2,TRIM25,HIRA,DDIT3,TBL1X,TADA3,ASAH1,BRCA1,MED18,TOX2,NCOR2,SUFU,TRIM5,LMO2,NCOA2,ARID3A,TCP10L,NUP98,GPS2,LCOR,CTBP2,MED4,SIAH2,BCORL1,HDAC4,HSPA1A,RBBP8,TAF12,ZMIZ1,ELANE,DMAP1,MAP3K10,BRDT,PIAS4,HTATIP2,UBE2L3,PRM…
GO:MF	endopeptidase activity	GO:0004175	FALSE	4.03E-34	33.3948	576	3059	101	78724	CTSD,NLRC4,CTSB,CAPNS2,ASPRV1,CASP1,PSENEN,HTRA3,CTSS,F12,TIMP2,HP,PCSK5,SERPINA1,MMP8,PRSS57,SERPINB8,PSME1,CARD16,APP,CARD8,SPINT1,LTF,PSME2,SLPI,PRSS41,PSEN1,APH1B,MEP1A,GPAA1,C1RL,RHBDL2,CST7,PRSS58,SERPINB6,NAIP,TFPI,HPR,PI3,CAPN5,CSTA,CASP9,USP10,RHBDL1,GAPDH,MMP9,SORL1,ECE2,HM13,VSIR,ATG4B,SFRP1,PSMB9,COL28A1,ZMPSTE24,BST2,ANXA2,WFDC3,APLP2,ELANE,ADAM17,CAPN1,CTSO,CTSH,PROC,SERPING1,XIAP,P…
GO:MF	ATP-dependent activity	GO:0140657	FALSE	9.17E-34	33.0377	626	3059	105	78724	UPF1,ATP6V0E1,RFC2,HSPA1L,NLRP3,ATP6V0A1,TAP1,SMPDL3A,ATP11A,TOR1A,DDX23,TDRD9,ATP6AP1,ATP6V1E1,SLC27A2,TMEM30A,MSH6,RUVBL2,VPS4B,KIF3C,MYO1F,ACSBG1,KIF13A,KIF13B,SPAST,ATP1B3,ACSL3,ACSS2,ABCC6,ENTPD1,ABCA13,ATP6V0D1,MYD88,HSP90AA1,NAIP,ATP6V0C,NUBP1,MYO9B,ACSF2,MYO7A,PSMC3,TCIRG1,SMARCAL1,DNAJB6,SIL1,SMCHD1,HSPA6,ABCB6,DICER1,MORC3,HSPA1A,PSMC5,ABCB10,MFSD2A,KIF27,ATG7,CCT7,MYO7B,TOR1B,ATP6V1A,A…
GO:MF	molecular function inhibitor activity	GO:0140678	FALSE	1.07E-33	32.9708	528	3059	96	78724	LMTK2,SH3BP5L,TESC,OAZ2,ARRB1,CDKN2C,TIMP2,LAMP1,YWHAG,SERPINA1,SERPINB8,CARD16,APP,SPINT1,YWHAB,STYXL1,LTF,OAZ1,SLPI,ANXA4,ANXA5,PARP9,PPP1R10,DTX3L,LRPAP1,WDTC1,GMFG,HSPB1,DDIT3,CST7,SLC30A1,LILRB4,SERPINB6,NAIP,TFPI,PPP1R12A,PI3,PKD1,CSTA,BEX1,GPS2,USP10,VAMP8,GAPDH,SORL1,COL28A1,HSPA1A,MAPK7,BST2,SAG,ANXA2,WFDC3,APLP2,U2AF2,FKBP1A,LIMK2,PDE6H,LYPD1,ANXA3,PPP1R12C,SERPING1,FNIP2,CLSTN3,CALM2,X…
GO:MF	DNA-binding transcription factor binding	GO:0140297	FALSE	1.57E-33	32.8054	488	3059	92	78724	CEBPA,ASCL2,CTNNB1,RXRA,FKBP4,WWP2,MED16,BCL6,WIPI1,NLRP3,HCLS1,KLF5,VDR,SMARCD3,NCOA6,PARP10,HDAC5,ANKRD2,CREBBP,MEF2A,SPI1,TLE4,TRIP6,ESRRB,STK4,ANXA4,PADI2,PARP9,DTX3L,RB1,HSPB1,HIRA,DDIT3,MAPK14,TADA3,ASAH1,ZNF516,YWHAZ,NCOR2,PPARG,LMO2,NCOA2,CRTC2,HIF1A,FBP1,BEX1,SP1,TCP10L,STAT5A,LCOR,CTBP2,MED4,EPAS1,CGGBP1,GFI1B,CRKL,DAPK3,ATOH8,MAX,HDAC4,PSMC5,RBBP8,CTDP1,TAF12,DMAP1,MAP3K10,HSF1,STAT5B,…
GO:MF	GTPase binding	GO:0051020	FALSE	3.88E-33	32.4115	317	3059	74	78724	RIN3,RANBP3,DENND1A,RRAGD,RPH3AL,DIAPH1,RAB7A,CDC42EP4,LCP1,UNC13D,ARHGAP1,WAS,RAB3GAP2,TMEM127,ATP6AP1,FGD3,GNB2,CLTA,XPO5,SYTL3,CYFIP1,DMXL2,GNB1,HPS6,LAMTOR1,BRK1,NDRG1,DENND5A,DOCK4,SRGAP2,EHD1,RANGAP1,HSP90AA1,NCF2,MEGF9,MYO9B,FGD4,AKAP13,XPO7,SORL1,MAP3K11,DAPK3,RABAC1,ARHGDIB,TNPO3,MYO5A,ULK1,PPP6R1,RHOBTB3,GIT2,PARD6A,PICALM,PAK1,IQGAP1,LRRK2,XPO6,SH3BP4,BIRC5,RAB11FIP3,SGSM3,RIMS3,MYO1C,…
GO:MF	phospholipid binding	GO:0005543	FALSE	1.52E-32	31.8171	491	3059	91	78724	NCF1,TWF2,DENND1A,SBF2,CAPG,ARAP1,ZFYVE1,DYSF,HS1BP3,TOM1,WIPI1,ARHGAP26,NLRP3,FLII,SLC9A1,APOA1,C2CD2L,EPN1,SNX27,OSBPL5,SVIL,BTK,CHMP2A,BIN2,SYTL3,PREX1,SMPD3,SHC1,SAP30L,PSAP,ANXA4,ANXA5,PLEKHB2,SNX32,GPAA1,PLA2G15,STAM2,OSBPL1A,KCNJ2,CD300LF,ANXA11,PITPNM1,GABARAP,PACSIN2,FES,SPTB,RAB35,GAB2,PICK1,CD300A,PLA2G4A,TIRAP,GSN,PITPNA,SNX11,ANXA2,TTPAL,NCF4,PXK,SNX6,SCARB2,JAG1,SNX12,ANXA3,SH3PXD2B…
GO:MF	transmembrane signaling receptor activity	GO:0004888	FALSE	2.38E-32	31.6233	1307	3059	156	78724	SEMA4D,AGTRAP,CD300C,TMEM63B,LILRA5,LILRA6,NFAM1,TNFRSF1B,OR1J4,NRG1,S1PR4,ADORA3,GPR84,IL17RA,HRH2,GFRA3,EFNA4,GPR17,IL13RA1,CSF1R,ACKR1,LTB4R,PTPRE,OPRD1,CCRL2,FCER1G,IL10RB,SORT1,OSCAR,C3AR1,TLR5,PDGFRB,TNFRSF8,CSF2RA,IGF2R,OR10H2,TLR2,TLR1,IFNAR1,GPR35,PTPN6,P2RX1,SPHK1,C5AR1,IFNGR2,CMKLR1,TNFRSF14,LILRB4,FZD2,SUCNR1,GPR27,OXER1,PPARG,OR1Q1,IL1R2,PTPRF,PLXNA2,ANTXR2,PKD1,ITGB2,CXCR4,NLRP6,CHR…
GO:MF	secondary active transmembrane transporter activity	GO:0015291	FALSE	9.11E-31	30.0407	287	3059	68	78724	SLC16A3,CLCN4,SLC35A2,SLCO4C1,SLC36A1,SLC1A5,SLC34A3,SLC9A1,SLC15A3,GHITM,SLC25A22,SLC46A2,SLC24A3,SLC12A9,SLC4A8,SLC8A1,SLC38A2,SLC10A3,SLC19A1,SLC15A4,SLC22A4,SLC9A8,SLC26A8,SLC30A1,SLC25A3,SLC1A7,SLC12A6,SLC5A9,SLC25A11,SLC44A1,CLCN7,SLC2A9,SLC17A5,MFSD2A,SLC6A13,SLC25A14,SLC29A1,SLC11A1,SLC28A3,SLC9A9,SLC44A2,SLC22A1,CLCN3,SLCO3A1,CLCN5,SLC22A18,SLC7A5,SLC25A2,SLC4A10,SLC7A6,SLC24A1,SLC10A1,S…
GO:MF	protein serine kinase activity	GO:0106310	FALSE	3.03E-29	28.5181	360	3059	74	78724	MAP2K2,GSK3A,LMTK2,MARK2,NEK4,AATK,MAST3,RIPK3,MAPK1,MAP4K4,SRPK1,MAP2K6,PRKCD,MAP3K6,MAPKAPK2,PRKD2,SRPK2,MAP3K3,CLK3,PRKACA,LRRK1,CAMKK2,PHKG1,MAP3K5,PINK1,STK4,EIF2AK2,STK3,MAPK14,RPS6KB2,EIF2AK1,DCLK2,MAP2K1,STK16,HIPK1,PDPK1,MAP3K11,MAPKAPK3,DAPK3,MAPK7,OXSR1,CSNK1G2,PIK3CG,MAP3K10,LIMK2,MARK3,STK40,STK10,BCKDK,MAP2K3,ULK1,DAPK2,PIM3,CDK16,CAMK2G,RPS6KA5,PAK1,CDK7,CDK14,LRRK2,FAM20C,TTBK1,DY…
GO:MF	cadherin binding	GO:0045296	FALSE	6.92E-29	28.1601	335	3059	71	78724	TWF2,F11R,CAPG,MARK2,EXOC3,CTNNB1,S100P,DBN1,PLIN3,TBC1D2,ARHGAP1,LYPLA2,IST1,RAB10,CHMP4B,PCMT1,PRDX6,TJP2,YWHAB,PDLIM5,PRDX1,EHD4,TES,LASP1,PSEN1,FSCN1,NDRG1,RTN4,CDK5R1,EPS8L1,TRIM25,EHD1,RANGAP1,YWHAZ,ARVCF,OLFM4,BSG,ALDOA,PACSIN2,RAN,VASP,SCYL1,ZC3HAV1,MAPRE1,CRKL,IDH1,LDHA,CBL,HNRNPK,HSPA1A,ANXA2,CAPZB,CORO1B,S100A11,CNN2,CHMP2B,CALD1,CDH10,EFHD2,PICALM,PPP1CA,IQGAP1,NUDC,NOP56,KRT18,ANK3,C…
GO:MF	small GTPase binding	GO:0031267	FALSE	2.64E-28	27.5777	285	3059	65	78724	RIN3,RANBP3,DENND1A,RPH3AL,DIAPH1,RAB7A,CDC42EP4,UNC13D,ARHGAP1,WAS,RAB3GAP2,TMEM127,ATP6AP1,FGD3,XPO5,SYTL3,CYFIP1,DMXL2,HPS6,BRK1,NDRG1,DENND5A,DOCK4,SRGAP2,EHD1,RANGAP1,NCF2,MEGF9,MYO9B,FGD4,AKAP13,XPO7,SORL1,MAP3K11,DAPK3,ARHGDIB,TNPO3,MYO5A,ULK1,PPP6R1,RHOBTB3,GIT2,PARD6A,PICALM,PAK1,IQGAP1,LRRK2,XPO6,SH3BP4,BIRC5,RAB11FIP3,SGSM3,RIMS3,MYO1C,CAV1,BICD1,RAB11FIP2,PLEKHG1,RAPGEF4,XPO1,XPO4,KNT…
GO:MF	ubiquitin-like protein ligase activity	GO:0061659	FALSE	6.24E-27	26.2047	379	3059	73	78724	RNF208,ANAPC11,TRIM8,RNF111,WWP2,RNF181,FBXO6,FBXW11,FBXO27,RNF144B,PCGF3,ATG3,RNF138,NEURL3,MGRN1,MAEA,NT5C2,TRAF7,RNF185,DTX3L,TRIM28,TRAF6,TRIM25,RNF135,MED18,RNF31,TRIM5,TRIM69,RFFL,RNF130,RC3H1,PRPF19,RNF146,RNF167,UBR4,MKRN1,MUL1,SIAH2,RNF113A,CBL,UBR2,TRIM34,TRIM41,MIB1,ZMIZ1,ZNF598,MEFV,PIAS4,RNF10,MED8,RNF122,MDM2,XIAP,PML,MKRN2,RNF38,MIB2,HECW2,RNF40,RNF149,RNF220,IRF2BP1,MED1,TRIM44,FB…
GO:MF	RNA polymerase II-specific DNA-binding transcription factor binding	GO:0061629	FALSE	3.56E-26	25.449	348	3059	69	78724	CEBPA,CTNNB1,RXRA,FKBP4,WWP2,MED16,WIPI1,HCLS1,VDR,SMARCD3,NCOA6,HDAC5,ANKRD2,CREBBP,MEF2A,SPI1,TRIP6,ESRRB,STK4,ANXA4,PADI2,PARP9,DTX3L,RB1,HSPB1,HIRA,DDIT3,MAPK14,TADA3,ASAH1,NCOR2,PPARG,LMO2,NCOA2,HIF1A,FBP1,BEX1,SP1,LCOR,MED4,EPAS1,GFI1B,CRKL,HDAC4,RBBP8,CTDP1,DMAP1,HSF1,STAT5B,BUD31,NOTCH2,NCOA7,SETD1A,TRIB1,TAF10,TAF4,CALR,MEF2D,DNAJA1,RAD23B,DNAJA3,SMAD3,MED1,ETS1,GATA3,TRIB2,NCOA3,POU4F1,…
GO:MF	RNA binding	GO:0003723	FALSE	4.82E-26	25.3167	3091	3059	253	78724	TWF2,SLC16A3,CKAP4,RNASEL,MARK2,TST,UPF1,FKBP4,DIAPH1,CDC42EP4,JMJD6,GTPBP1,GRN,SRPK1,SLIRP,SMG5,SRSF4,ISG20,TLR7,YWHAG,TLR8,GRB2,AGFG1,DDX23,TDRD9,ASCC1,SMNDC1,ATXN1L,SRPK2,HADHB,SPI1,LGALS1,CLK3,XPO5,TDRD7,PA2G4,CTU1,SNRPB2,TUFM,CORO1A,TRIP6,EIF4E2,ZCCHC3,PRDX1,ARF1,NUSAP1,CYFIP1,TES,EXOSC1,SMAD1,QKI,LBR,SLPI,BOP1,RNU6-540P,EXOSC4,ANG,SAFB,EIF2AK2,ATXN1,PPP1R10,FSCN1,SRBD1,ACTN1,ACO1,MRPL11,CPE…
GO:MF	chromatin binding	GO:0003682	FALSE	1.05E-25	24.9803	636	3059	94	78724	CEBPA,UPF1,WDR13,JDP2,CTNNB1,BCL6,TSHZ3,RCOR1,FOSL2,SMARCD3,TADA2B,NCOA6,ERG,HDAC5,ATF5,FLI1,CREBBP,MEF2A,MLLT1,SPI1,SETDB1,TLE4,CEBPB,PHF13,BRD4,MSH6,RUVBL2,SAP30L,NR1H3,MSL1,SAFB,ACSS2,PAF1,TRIM28,HIRA,TOX2,NCOR2,POLR3D,PHF21A,PPARG,MBD1,NCOA2,PLAC8,ARID3A,NUP98,RAN,HNRNPC,MCMBP,MPO,FOXO3,PAX6,WAC,HDAC4,THRA,NPM2,KDM1B,POLG,HSF1,STAT5B,TOP1,PCBP2,E2F4,DNMT1,FMR1,CBX1,CBX2,TAF10,MBD3,DHX30,KDM6B…
GO:MF	phosphoric ester hydrolase activity	GO:0042578	FALSE	2.15E-25	24.6678	488	3059	81	78724	LMTK2,PTEN,SBF2,TESC,INPP5D,SMPDL3A,DUSP23,BMP2,PFKFB4,PTPRE,UBASH3B,PPP1R3D,MTMR3,PTPN23,PDGFRB,PPP1R15B,NT5C2,STYXL1,SMPD3,PPP4R1,ARF4,PPP1R7,UBLCP1,EIF2AK2,PPP1R10,FIG4,SBF1,PTPN6,CTDSP1,PTPN12,DUSP3,PTPRF,PPP1R12A,PPM1D,SYNJ1,PPP2R5A,FBP1,DUSP6,PPM1B,CHRM3,INPP5K,SSH1,DUSP1,CALM3,CTDP1,SAG,PTPN18,PPP2R3B,CNP,LIMK2,PDE6H,PFKFB3,BCKDK,PPP1R12C,INPP5A,CALM2,PPP6R1,PLD1,CAMK2G,PPP1R3B,ACP6,CTDSP2…
GO:MF	ubiquitin protein ligase activity	GO:0061630	FALSE	2.54E-25	24.5958	359	3059	69	78724	RNF208,ANAPC11,TRIM8,RNF111,WWP2,RNF181,FBXO6,FBXW11,FBXO27,RNF144B,PCGF3,RNF138,NEURL3,MGRN1,MAEA,NT5C2,TRAF7,RNF185,DTX3L,TRIM28,TRAF6,TRIM25,RNF135,MED18,RNF31,TRIM5,TRIM69,RFFL,RNF130,RC3H1,PRPF19,RNF146,RNF167,UBR4,MKRN1,MUL1,SIAH2,RNF113A,CBL,UBR2,TRIM34,TRIM41,MIB1,ZNF598,MEFV,RNF10,MED8,RNF122,MDM2,XIAP,MKRN2,RNF38,MIB2,HECW2,RNF40,RNF149,RNF220,IRF2BP1,MED1,TRIM44,FBXO17,TRIM2,HECTD2,DZI…
GO:MF	enzyme inhibitor activity	GO:0004857	FALSE	3.54E-25	24.4513	403	3059	73	78724	LMTK2,SH3BP5L,TESC,OAZ2,ARRB1,CDKN2C,TIMP2,YWHAG,SERPINA1,SERPINB8,CARD16,APP,SPINT1,YWHAB,STYXL1,LTF,OAZ1,SLPI,ANXA4,ANXA5,PARP9,PPP1R10,DTX3L,WDTC1,GMFG,HSPB1,CST7,LILRB4,SERPINB6,NAIP,TFPI,PPP1R12A,PI3,CSTA,GPS2,GAPDH,SORL1,COL28A1,MAPK7,BST2,SAG,ANXA2,WFDC3,APLP2,LIMK2,PDE6H,ANXA3,PPP1R12C,SERPING1,CLSTN3,XIAP,SPINT2,RENBP,TRIB1,SERPINA6,GBP2,IQGAP1,INKA1,LRRK2,CDKN2D,SERPINB2,PPP1R9B,HTRA2,P…
GO:MF	carbohydrate binding	GO:0030246	FALSE	4.01E-24	23.3972	284	3059	60	78724	HK2,HK3,DGCR2,OS9,FCN1,FBXO6,ASGR2,RPIA,MANBA,SELL,PPP1R3D,GBE1,LGALS1,CLEC4E,SIGLEC5,IGF2R,EGLN1,SLC2A14,G6PD,TALDO1,CLC,GUSB,SLC2A3,FREM1,GANAB,ASGR1,BSG,ALDOA,PLOD3,PKD1,MGAM,FBP1,PLOD2,GALK1,CLEC3B,PTX3,GALNT3,LMAN2,CLEC4A,FAM3D,PLOD1,LGALS12,SELE,CLEC11A,PPP1R3B,GALNT6,MAN2B1,CALR,MRC2,GAA,CD93,CLEC4D,OLR1,FAM3B,KLRG1,CD207,LMAN1,PFKP,CD22,CLEC4M
GO:MF	GDP binding	GO:0019003	FALSE	4.38E-24	23.3581	324	3059	64	78724	LAMTOR2,RIN3,RAB5C,DENND1A,SBF2,SH3BP5L,RRAGD,SH2D3C,RAB7A,VAV1,RAB3GAP2,ITSN1,SESN2,RASGEF1A,RAB10,FGD3,ARL2,PREX1,ARF4,LAMTOR1,CYTH2,VAV3,SBF1,ARL8B,CCZ1,RGS14,DENND5A,GBP1,DOCK4,EPS8L1,RHOB,NUCB1,FGD4,RAN,EIF2B5,RAB21,RAB35,IQSEC1,AKAP13,DENND2A,DENND3,TIAM2,ARHGEF5,MON1A,RAB5A,ARHGDIB,RAB27A,PLEKHG6,ABR,GNA13,RRAS2,ARHGEF11,RIC8A,SH3BP4,GPSM1,DENND4C,PLEKHG1,KALRN,EEF1B2,RAPGEF4,BCAR3,OBSCN,N…
GO:MF	GTPase activator activity	GO:0005096	FALSE	3.10E-23	22.5084	275	3059	58	78724	RIN3,RANBP3,ARAP1,TBC1D10B,SIPA1,ARRB1,ARHGAP26,RP2,RALGAPA2,TBC1D2,ARHGAP1,TBC1D14,RAB3GAP2,AGFG1,ACAP2,PDGFRB,SIPA1L1,PREX1,TBC1D2B,TBC1D10C,GMIP,SMAP2,VAV3,RGS14,ARHGAP27,DOCK4,SRGAP2,RANGAP1,RAP1GAP2,MYO9B,BNIP2,ALDH1A1,ARFGAP2,TBC1D25,RGS3,TIAM2,STARD8,ARHGAP19,SIPA1L2,ARHGDIB,RABEP2,ARHGAP10,AGAP3,PLEKHG6,ABR,GIT2,ARHGEF11,TBC1D8,TBC1D22A,IQGAP1,LRRK2,ARHGAP32,ASAP3,RGS8,SGSM3,HTR2B,CHN1,AR…
GO:MF	proton transmembrane transporter activity	GO:0015078	FALSE	4.34E-23	22.3629	186	3059	48	78724	NDUFB1,NDUFS2,SLC16A3,ATP6V0E1,SLC36A1,ATP6V0A1,SLC9A1,UQCR10,SLC15A3,NDUFB4,NDUFA1,GHITM,ATP6V1E1,SLC25A22,NDUFV2,NDUFC1,NDUFC2,SLC15A4,ATP6V0D1,SLC9A8,SLC30A1,SLC25A3,COX5A,ATP6V0C,TCIRG1,COX6B1,SLC2A9,SLC17A5,ATP5MF,NDUFB6,ATP6V1A,SLC25A14,NDUFB3,ATP6V1B2,SLC11A1,COX8A,ATP6V1C1,ATP6V0B,COX5B,SLC9A9,UQCRFS1,NDUFS7,COX4I1,ATP6V1G2,SLC4A11,SLC9A7,SLC9B1,SLC18A3
GO:MF	metal ion transmembrane transporter activity	GO:0046873	FALSE	4.85E-23	22.3143	540	3059	82	78724	TRPC6,CACNA1E,SCLT1,SLC34A3,SLC9A1,ORAI3,GHITM,PANX1,SLC31A2,SLC24A3,SLC12A9,SLC4A8,SLC8A1,PSEN1,SLC38A2,NIPA2,SLC10A3,P2RX1,KCNAB2,KCNJ15,SLC9A8,CNNM4,CACNG8,SLC39A1,SLC40A1,KCNJ2,SLC30A1,SLC1A7,PKD1,SLC12A6,SLC5A9,KCNE1,RRAD,KCNE3,CACNG4,TRPC4AP,MFSD2A,MCOLN2,ANXA2,ORAI1,SLC6A13,NOS1,CACNA1B,FGF13,SLC29A1,SLC11A1,FXYD6,CALM2,SLC28A3,SLC9A9,SLC39A11,SLC22A1,MICU1,GLRX,SLC39A3,KCNN3,SLC41A2,SLC4A…
GO:MF	DNA-binding transcription activator activity	GO:0001216	FALSE	9.64E-23	22.016	486	3059	77	78724	MAFG,MTF1,CEBPA,ASCL2,ELF4,ZNF341,PLAGL1,KLF5,FOSL2,ZNF319,ERG,ATF5,MAFB,FLI1,BACH1,MEF2A,SPI1,MLXIP,BATF,NR6A1,CEBPB,PLSCR1,ESRRB,NR1H3,SMAD1,IRF1,CEBPD,DDIT3,BRCA1,PPARG,E2F3,HIF1A,SP1,CEBPE,CASZ1,SOX1,EPAS1,GFI1B,FOXO3,PAX6,ATF6,KLF13,HSF1,STAT5B,OTX1,KLF6,E2F4,NOTCH2,ZBTB7B,RLF,TFE3,ZNF784,VEZF1,E2F2,PRDM16,NFYC,MEF2D,OSR2,HOXA9,NFIC,SMAD3,GLIS1,IRF4,ETS1,PAX5,MAF,TCF4,GATA3,ZNF43,SPIB,HLF,SP…
GO:MF	phosphatase activity	GO:0016791	FALSE	9.09E-22	21.0415	388	3059	67	78724	LMTK2,PTEN,SBF2,TESC,INPP5D,DUSP23,BMP2,PFKFB4,PTPRE,UBASH3B,PPP1R3D,MTMR3,PTPN23,PPP1R15B,NT5C2,STYXL1,PPP4R1,PPP1R7,UBLCP1,EIF2AK2,PPP1R10,FIG4,SBF1,PTPN6,CTDSP1,PTPN12,DUSP3,PTPRF,PPP1R12A,PPM1D,SYNJ1,PPP2R5A,FBP1,DUSP6,PPM1B,INPP5K,SSH1,DUSP1,CALM3,CTDP1,SAG,PTPN18,PPP2R3B,LIMK2,PFKFB3,BCKDK,PPP1R12C,INPP5A,CALM2,PPP6R1,CAMK2G,PPP1R3B,ACP6,CTDSP2,PSPH,PPP1CA,PPP1CB,DUSP13B,PPP1R9B,PPP1R17,PTP…
GO:MF	protein tyrosine kinase activity	GO:0004713	FALSE	1.51E-21	20.8199	183	3059	46	78724	MAP2K2,AATK,NRG1,EFNA4,MAP2K6,PRKCD,CSF1R,SYK,FGR,JAK2,BTK,CLK3,PDGFRB,IGF2R,CAMKK2,EIF2AK2,JAK3,TYK2,CSK,LILRB4,BMX,FES,MAP2K1,SCYL1,STK16,EFNA3,HIPK1,LYN,MAP3K11,BAZ1B,HCK,TEK,MAP3K10,IGF1R,MAP2K3,EPHB2,VEGFA,RPS6KA5,TTBK1,LTK,DYRK4,EPHA4,CAV1,RET,MAP3K9,AXL
GO:MF	phosphatidylinositol binding	GO:0035091	FALSE	3.48E-21	20.4588	280	3059	56	78724	NCF1,TWF2,DENND1A,SBF2,CAPG,ARAP1,ZFYVE1,HS1BP3,TOM1,WIPI1,NLRP3,FLII,SLC9A1,C2CD2L,SNX27,OSBPL5,SVIL,BTK,SAP30L,PLEKHB2,SNX32,GPAA1,STAM2,KCNJ2,PITPNM1,FES,RAB35,GAB2,PLA2G4A,TIRAP,GSN,PITPNA,SNX11,ANXA2,TTPAL,NCF4,PXK,SNX6,SNX12,SH3PXD2B,WIPI2,PLD1,PITPNM2,PLEKHF2,PICALM,PLD2,IQGAP1,SDCBP,ZFYVE16,OSBPL2,SNX30,ARHGAP32,SNX25,OBSCN,PLEKHN1,ITPR1
GO:MF	DNA-binding transcription activator activity, RNA polymerase II-specific	GO:0001228	FALSE	4.04E-21	20.3938	479	3059	74	78724	MAFG,MTF1,CEBPA,ASCL2,ELF4,PLAGL1,KLF5,FOSL2,ZNF319,ERG,ATF5,MAFB,FLI1,BACH1,MEF2A,MLXIP,BATF,NR6A1,CEBPB,PLSCR1,ESRRB,NR1H3,SMAD1,IRF1,CEBPD,DDIT3,PPARG,E2F3,HIF1A,SP1,CEBPE,CASZ1,SOX1,EPAS1,GFI1B,FOXO3,PAX6,ATF6,KLF13,HSF1,STAT5B,OTX1,KLF6,E2F4,NOTCH2,ZBTB7B,RLF,TFE3,ZNF784,VEZF1,E2F2,PRDM16,NFYC,MEF2D,OSR2,HOXA9,NFIC,SMAD3,GLIS1,IRF4,ETS1,PAX5,MAF,TCF4,GATA3,ZNF43,SPIB,HLF,SP7,RFXAP,POU4F1,ZNF…
GO:MF	lipid transporter activity	GO:0005319	FALSE	2.43E-20	19.6144	177	3059	44	78724	STAR,ATP11A,ATG9A,APOA1,C2CD2L,CEACAM1,GM2A,TSPO,SLC2A1,OSBPL5,SLC27A2,TMEM30A,PLSCR1,SLC10A3,CLN3,ABCA13,OSBPL1A,PITPNM1,STARD3,PITPNA,GRAMD1A,MFSD2A,NPC2,PRELID1,CLPTM1L,ANO6,SLC43A3,PITPNM2,SLC22A1,VDAC2,SLCO3A1,OSBPL2,XKR8,SPNS2,ABCA9,STARD5,SLC10A1,SLC27A5,ATP8B2,ABCB4,TMEM30B,SLC22A8,SLCO4A1,APOA4
GO:MF	immune receptor activity	GO:0140375	FALSE	2.51E-20	19.5999	152	3059	41	78724	LILRA5,LILRA6,IL17RA,GFRA3,GPR17,IL13RA1,CCRL2,FCER1G,IL10RB,C3AR1,CSF2RA,IFNAR1,GPR35,C5AR1,IFNGR2,CMKLR1,LILRB4,IL1R2,CXCR4,LILRA1,EPOR,CD44,CSF2RB,CTSH,CCR2,IFNGR1,FCGR3A,CD4,IL4R,LILRA4,MPL,CCR9,CCR6,CCR4,IL17REL,HLA-DOA,LEPR,HLA-DOB,IL7R,CXCR6,GPR15
GO:MF	tubulin binding	GO:0015631	FALSE	4.39E-20	19.3576	392	3059	65	78724	ARL8A,LRRC61,FBXW11,MAP4K4,MAP1S,DIP2B,CETN2,S100A8,CLIP1,REEP4,ATF5,HAUS4,S100A9,NUSAP1,KIF3C,KIF13A,KIF13B,SPAST,GPAA1,ARL8B,RGS14,NDRG1,CDK5R1,B9D2,BRCA1,NEDD1,GABARAP,ALDOA,DCLK2,FES,MAP4,GAPDH,MAPRE1,LYN,RAE1,NDE1,POLB,KIF27,HOOK3,FGF13,REEP3,KIF1C,FMR1,PAFAH1B1,BCL2L11,PAK1,UNC5C,LRRK2,TBCA,TUBGCP5,CLIP3,BIRC5,GTSE1,KIF5C,SLC6A2,OFD1,MID1,EML6,CENPJ,NAV3,TUBGCP4,SPC24,KIF2A,OPA1,BRSK1
GO:MF	peptidase regulator activity	GO:0061134	FALSE	1.54E-19	18.8122	231	3059	49	78724	NLRC4,CASP1,PSENEN,CTSS,TIMP2,PYCARD,SERPINA1,SERPINB8,PSME1,CARD16,APP,CARD8,SPINT1,LTF,PINK1,PSME2,SLPI,APH1B,APAF1,CST7,SERPINB6,NAIP,TFPI,PI3,CSTA,GAPDH,SORL1,VSIR,NLRP12,COL28A1,BST2,ANXA2,WFDC3,APLP2,CTSH,SERPING1,XIAP,SPINT2,RENBP,SERPINA6,GBP2,SERPINB2,NLRP7,BIRC5,SPINK2,DMWD,CAV1,A2M,WFIKKN2
GO:MF	serine hydrolase activity	GO:0017171	FALSE	1.94E-19	18.7123	303	3059	56	78724	HTRA3,CTSS,F12,HP,PCSK5,SERPINA1,MMP8,PRSS57,SERPINB8,APP,SPINT1,CTSA,LTF,SCPEP1,SLPI,PRSS41,NCEH1,C1RL,RHBDL2,PRSS58,SERPINB6,TFPI,HPR,PI3,NUP98,RHBDL1,MMP9,COL28A1,ANXA2,WFDC3,APLP2,ELANE,CTSH,PROC,SERPING1,PARL,SPINT2,ADAM8,SERPINA6,SEC11A,HTRA1,SERPINB2,HTRA2,PLAU,PCSK7,PRSS55,GZMK,SPINK2,TMPRSS7,DPP4,SEC11C,PRSS16,MMP11,A2M,WFIKKN2,DPP10
GO:MF	signaling adaptor activity	GO:0035591	FALSE	2.84E-19	18.5471	121	3059	36	78724	MAP2K2,GAB1,TICAM1,NLRP3,HCLS1,GRB10,GRB2,GNB4,GNB2,SHC1,IFNAR1,GNB1,SH2B2,IRS2,RGS14,MYD88,SHB,NLRP6,DOK2,MAP2K1,GAB2,AKAP13,CRKL,TIRAP,CARD9,DEDD2,SQSTM1,FMR1,STAP2,LAMP2,IQGAP1,FADD,LRRK2,CD3G,DAB1,KSR2
GO:MF	serine-type peptidase activity	GO:0008236	FALSE	5.75E-19	18.2403	299	3059	55	78724	HTRA3,CTSS,F12,HP,PCSK5,SERPINA1,MMP8,PRSS57,SERPINB8,APP,SPINT1,CTSA,LTF,SCPEP1,SLPI,PRSS41,C1RL,RHBDL2,PRSS58,SERPINB6,TFPI,HPR,PI3,NUP98,RHBDL1,MMP9,COL28A1,ANXA2,WFDC3,APLP2,ELANE,CTSH,PROC,SERPING1,PARL,SPINT2,ADAM8,SERPINA6,SEC11A,HTRA1,SERPINB2,HTRA2,PLAU,PCSK7,PRSS55,GZMK,SPINK2,TMPRSS7,DPP4,SEC11C,PRSS16,MMP11,A2M,WFIKKN2,DPP10
GO:MF	phosphatase binding	GO:0019902	FALSE	6.47E-19	18.1888	191	3059	44	78724	SBF2,CTNNB1,MVP,MAPK1,SMG5,SLC9A1,CSF1R,CEACAM1,SYK,PPP1R3D,GRB2,PXN,MTMR3,AKAP5,STYXL1,MAP3K5,PPP1R10,JAK3,IRS2,SPHK1,CSK,MAPK14,HSP90AA1,LILRB4,PPARG,STAU1,CARHSP1,TRPC4AP,TERF2IP,CHCHD3,PPP1R18,PPP6R1,PPP1R3B,PPP1CA,IQGAP1,PPP1R9B,SMAD3,PVRIG,STX17,CDH5,DZIP3,PPP3R2,CD22,SLC6A3
GO:MF	actin filament binding	GO:0051015	FALSE	4.12E-18	17.3848	209	3059	45	78724	TWF2,CAPG,ARPC2,FLII,PSTPIP2,LCP1,HCLS1,MAP1S,SVIL,PANX1,CORO1A,CYFIP1,MYO1F,LASP1,FSCN1,ACTN1,ARPC1A,CDK5R1,WDR1,ACTR2,CORO2A,MYO9B,MYO7A,SPTB,PICK1,GSN,PSTPIP1,CAPZB,CORO1B,CLMN,MYO7B,CNN2,ACTR3,MYO5A,COTL1,ARPC3,MARCKS,IQGAP1,PPP1R9B,MYO1C,NEB,FLNC,CORO2B,AIF1L,SHROOM2
GO:MF	phosphoprotein binding	GO:0051219	FALSE	4.72E-18	17.3261	93	3059	31	78724	SH2D3C,FKBP4,MAPK1,VAV1,SYK,UBASH3B,GRB2,FGR,SLA,IGF2R,YWHAB,SHC1,RB1,PTPN6,YWHAZ,SHB,SH3BP2,RRAGA,LYN,CRKL,CBL,HCK,SAG,TBL2,FBXW7,PAFAH1B1,SCAF4,MID1,PTPN5,BCAR3,PTPN3
GO:MF	amide binding	GO:0033218	FALSE	1.42E-17	16.8486	245	3059	48	78724	MGST2,FKBP4,NQO2,APOA1,CLSTN1,C2CD2L,HMGCR,FKBP5,TLR2,COL25A1,PSAP,FOLR1,TLR1,HADHA,LRPAP1,SLC19A1,ACADVL,P2RX1,INHBA,SRD5A1,SLC40A1,CD300LF,CMKLR1,FOLR2,ITGB2,DBI,SORL1,PLA2G4A,C1QA,TLR6,FKBP1A,ITGAM,PPIB,IGF1R,CACNA1B,LRP1,EPHB2,PICALM,VDAC2,GSTM1,GSTM4,CLIP3,OXTR,GSTM2,EPHA4,GRIA4,CLN8,NKTR
GO:MF	phosphoprotein phosphatase activity	GO:0004721	FALSE	9.33E-17	16.0302	277	3059	50	78724	LMTK2,PTEN,DUSP23,PTPRE,UBASH3B,PPP1R3D,MTMR3,PTPN23,PPP1R15B,STYXL1,PPP4R1,PPP1R7,UBLCP1,EIF2AK2,PPP1R10,FIG4,SBF1,PTPN6,CTDSP1,PTPN12,DUSP3,PTPRF,PPM1D,PPP2R5A,DUSP6,PPM1B,SSH1,DUSP1,CALM3,CTDP1,SAG,PTPN18,PPP2R3B,LIMK2,BCKDK,CALM2,PPP6R1,CAMK2G,PPP1R3B,CTDSP2,PPP1CA,PPP1CB,DUSP13B,PPP1R9B,PPP1R17,PTPN13,DUSP4,PTPN5,PPP3R2,PTPN3
GO:MF	isomerase activity	GO:0016853	FALSE	1.02E-16	15.9919	452	3059	65	78724	UPF1,FKBP4,QSOX1,RFC2,RPIA,ITPK1,DDX23,TDRD9,TBXAS1,PGM1,DEGS1,FKBP5,ALOXE3,RUVBL2,HSD17B4,KIF3C,MYO1F,KIF13A,FKBP15,KIF13B,SPAST,TPI1,SDSL,FKBP9,P4HB,EBPL,MYO9B,MYO7A,PSMC3,SMARCAL1,PGAM1,DICER1,PSMC5,TMEM86B,KIF27,FKBP1A,PUS3,PPIB,MYO7B,TOP1,PUSL1,KIF1C,MYO5A,FMR1,RENBP,PSMC2,DHX30,DHX58,DDX41,FKBP14,DNAH8,HELLS,TXNDC5,TOP1MT,DNAI2,EP400,MCM4,MYO1C,KIF5C,SRCAP,NKTR,PDIA4,MCM2,DDX4,KIF2A
GO:MF	cytokine receptor binding	GO:0005126	FALSE	1.09E-16	15.9606	278	3059	50	78724	SYK,CCRL2,GRB2,TNFSF18,TOLLIP,PYCARD,JAK2,CCL23,TLR5,IL1B,CNIH4,TRIP6,SHC1,TNFSF12,CXCL14,JAK3,TYK2,IFNK,TRAF6,MYD88,CXCL1,CD300LF,TNFSF14,TMBIM1,TGFBR1,BID,SNX6,FKBP1A,ADAM17,CCR2,TNFSF10,IL37,VEGFA,ADAM8,CXCL16,IL10,CFLAR,SDCBP,FADD,IL34,DNAJA3,SMAD3,IL23A,LTA,GATA3,CCL17,CDH5,TRAF5,RASL11B,BAMBI
GO:MF	transmembrane transporter binding	GO:0044325	FALSE	1.34E-16	15.8715	143	3059	36	78724	CTNNB1,DIAPH1,HERPUD1,ASPH,PYCARD,TSPO,PANX1,TJP2,SLC8A1,BAK1,ACTN1,KCNAB2,YWHAZ,HSP90AA1,PKD1,USP10,KCNE1,AP2M1,LYN,KCNE3,GRINA,CALM3,FKBP1A,NOS1,FGF13,TCAP,CALM2,FMR1,LRRK2,PPP1R9B,S100A10,RIMS3,ANK3,CAV1,CDH5,DPP10
GO:MF	antiporter activity	GO:0015297	FALSE	1.51E-16	15.8208	135	3059	35	78724	CLCN4,SLC35A2,SLC1A5,SLC9A1,GHITM,SLC24A3,SLC4A8,SLC8A1,SLC19A1,SLC9A8,SLC26A8,SLC30A1,SLC25A11,SLC44A1,CLCN7,SLC25A14,SLC11A1,SLC9A9,SLC44A2,CLCN3,CLCN5,SLC7A5,SLC25A2,SLC4A10,SLC7A6,SLC24A1,SLC25A16,SLC4A11,SLC22A8,SLC9A7,SLC9B1,SLC30A4,SLC25A15,SLC35E4,SLC18A3
GO:MF	acyltransferase activity, transferring groups other than amino-acyl groups	GO:0016747	FALSE	1.83E-16	15.7375	239	3059	46	78724	AGPAT2,ZDHHC12,AGPAT3,APOA1,ALAS1,CREBBP,HADHB,PRDX6,NAA60,SAT2,HADHA,MBOAT7,PNPLA2,PLA2G15,ZDHHC3,SPHK1,DGAT1,ZDHHC19,AGPAT1,ACAA1,ELOVL3,LPCAT2,PLA2G4A,MBOAT2,ZDHHC5,BRPF3,SAT1,DGAT2,ELOVL1,ZDHHC2,LPCAT3,LPGAT1,ACAA2,TAF10,HGSNAT,GNPNAT1,ELOVL4,HHAT,ZDHHC23,SPTLC3,NMT2,KAT6B,SRCAP,CROT,NCOA3,APOA4
GO:MF	serine-type endopeptidase activity	GO:0004252	FALSE	2.06E-16	15.6859	282	3059	50	78724	HTRA3,CTSS,F12,HP,PCSK5,SERPINA1,MMP8,PRSS57,SERPINB8,APP,SPINT1,LTF,SLPI,PRSS41,C1RL,RHBDL2,PRSS58,SERPINB6,TFPI,HPR,PI3,RHBDL1,MMP9,COL28A1,ANXA2,WFDC3,APLP2,ELANE,CTSH,PROC,SERPING1,PARL,SPINT2,ADAM8,SERPINA6,SEC11A,HTRA1,SERPINB2,HTRA2,PLAU,PCSK7,PRSS55,GZMK,SPINK2,TMPRSS7,DPP4,SEC11C,MMP11,A2M,WFIKKN2
GO:MF	transcription coactivator activity	GO:0003713	FALSE	3.39E-16	15.4703	253	3059	47	78724	TRIM8,CTNNB1,MED16,RIPK3,ARRB1,SMARCD3,TADA2B,NCOA6,RBCK1,CREBBP,PCBD1,BRD4,QKI,NFKBIB,ACSS2,TRIM28,CD274,PHF2,TRIM25,TADA3,BRCA1,TOX2,TRIM5,LMO2,NCOA2,NUP98,GPS2,CTBP2,MED4,TAF12,ZMIZ1,BRDT,HTATIP2,UBE2L3,CCDC124,ATXN7L3,PML,PRDM16,RRP1B,IRF4,MED1,KAT6B,SRCAP,NCOA3,CENPJ,CIITA,POU2AF1
GO:MF	peptide binding	GO:0042277	FALSE	4.00E-16	15.398	254	3059	47	78724	RXRA,TAP1,NUP214,APOA1,CLSTN1,OPRD1,PCSK5,CLTA,TLR2,COL25A1,HLA-F,HLA-E,ANG,LRPAP1,RPS6KB2,HLA-A,PPARG,ITGB2,NUP98,NLRP6,AP2M1,SORL1,C1QA,TLR6,ITGAM,CACNA1B,KPNA4,LRP1,EPHB2,B2M,SRP68,PICALM,CALR,KDELR2,SLC7A5,GPR171,OXTR,HLA-DOA,EPHA4,SSTR2,HLA-DOB,KDELR3,GRIA4,HLA-DRB5,CLEC4M,HLA-DPB1,IPO4
GO:MF	symporter activity	GO:0015293	FALSE	4.58E-16	15.3391	148	3059	36	78724	SLC16A3,SLC36A1,SLC1A5,SLC34A3,SLC15A3,SLC25A22,SLC46A2,SLC24A3,SLC12A9,SLC4A8,SLC38A2,SLC10A3,SLC15A4,SLC22A4,SLC25A3,SLC1A7,SLC12A6,SLC5A9,SLC2A9,SLC17A5,MFSD2A,SLC6A13,SLC29A1,SLC28A3,SLC22A1,SLC22A18,SLC4A10,SLC24A1,SLC10A1,SLC6A2,SLC6A17,SLC6A16,SLC4A11,SLC6A5,SLC34A1,SLC6A3
GO:MF	guanyl-nucleotide exchange factor activity	GO:0005085	FALSE	5.49E-16	15.2603	235	3059	45	78724	LAMTOR2,RIN3,DENND1A,SBF2,SH3BP5L,SH2D3C,VAV1,RAB3GAP2,ITSN1,RASGEF1A,FGD3,PREX1,ARF4,LAMTOR1,CYTH2,VAV3,SBF1,CCZ1,DENND5A,DOCK4,EPS8L1,NUCB1,FGD4,EIF2B5,IQSEC1,AKAP13,DENND2A,DENND3,TIAM2,ARHGEF5,MON1A,PLEKHG6,ABR,GNA13,ARHGEF11,RIC8A,DENND4C,PLEKHG1,KALRN,EEF1B2,RAPGEF4,BCAR3,OBSCN,NGEF,DENND5B
GO:MF	endopeptidase regulator activity	GO:0061135	FALSE	6.22E-16	15.2061	186	3059	40	78724	NLRC4,PSENEN,TIMP2,SERPINA1,SERPINB8,PSME1,CARD16,APP,CARD8,SPINT1,LTF,PSME2,SLPI,APH1B,CST7,SERPINB6,NAIP,TFPI,PI3,CSTA,GAPDH,SORL1,VSIR,COL28A1,BST2,ANXA2,WFDC3,APLP2,SERPING1,XIAP,SPINT2,RENBP,SERPINA6,GBP2,SERPINB2,NLRP7,BIRC5,SPINK2,A2M,WFIKKN2
GO:MF	protease binding	GO:0002020	FALSE	6.91E-16	15.1606	141	3059	35	78724	NLRC4,PTEN,CASP1,FLOT2,OS9,RAD23A,TIMP2,SELL,PYCARD,SERPINA1,PANX1,CARD16,TNFRSF8,PSAP,PINK1,CDK5R1,APAF1,SERPINB6,RFFL,CSTA,INSL3,LCOR,ANXA2,ELANE,POLG,F2RL1,CFLAR,FADD,NDUFS7,FAM20C,NLRP7,DPP4,TNFRSF10A,A2M,SLC6A3
GO:MF	ATP hydrolysis activity	GO:0016887	FALSE	1.19E-15	14.923	411	3059	60	78724	UPF1,RFC2,HSPA1L,NLRP3,TAP1,SMPDL3A,ATP11A,TOR1A,DDX23,TDRD9,RUVBL2,VPS4B,KIF3C,KIF13A,KIF13B,SPAST,ABCC6,ENTPD1,ABCA13,HSP90AA1,NAIP,NUBP1,MYO9B,PSMC3,SMCHD1,HSPA6,ABCB6,MORC3,HSPA1A,PSMC5,ABCB10,KIF27,CCT7,TOR1B,ATP6V1A,KIF1C,RHOBTB3,PSMC2,CLPB,DHX30,HSPA1B,DHX58,DDX41,ABCA9,NAV1,DNAH8,ATP6V1G2,ABCB9,MCM4,MDN1,KIF5C,SRCAP,ATP8B2,ABCB4,CCT6B,NAV3,NLRP10,MCM2,DDX4,KIF2A
GO:MF	transcription corepressor activity	GO:0003714	FALSE	1.45E-15	14.8379	200	3059	41	78724	MIER2,RCOR1,PARP10,CREBBP,SAP30,TLE4,PA2G4,RUVBL2,PARP9,RB1,TRIM28,HIRA,DDIT3,TBL1X,ASAH1,NCOR2,SUFU,TCP10L,GPS2,LCOR,CTBP2,SIAH2,BCORL1,HDAC4,HSPA1A,RBBP8,ELANE,DMAP1,MAP3K10,PIAS4,PRMT5,TSG101,BASP1,IRF2BP1,CRYM,TLE6,MED1,CBFA2T2,CCND1,BCOR,LIMD1
GO:MF	channel activity	GO:0015267	FALSE	1.70E-15	14.7689	610	3059	75	78724	ANO10,TRPC6,CACNA1E,TMEM63B,CLCN4,TMEM120A,SCLT1,SLC1A5,APOL1,LAMP1,ORAI3,PANX1,PRKACA,SLC24A3,BAK1,PSEN1,P2RX1,KCNAB2,KCNJ15,CACNG8,SLC26A8,KCNJ2,SLC30A1,SLC1A7,ATP6V0C,PKD1,VAMP8,KCNE1,RRAD,CLCN7,KCNE3,CACNG4,TRPC4AP,ATP5MF,MCOLN2,ANXA2,ORAI1,FKBP1A,NOS1,CACNA1B,ATP6V1A,FGF13,ANO6,FXYD6,CALM2,SNF8,PANX2,BAX,MICU1,GLRX,LAMP2,VDAC2,CLCN3,VTI1B,CLCN5,KCNN3,CNGA1,HTR3A,KCNIP4,SLC24A1,TMC1,CAV1,GRIA…
GO:MF	passive transmembrane transporter activity	GO:0022803	FALSE	1.70E-15	14.7689	610	3059	75	78724	ANO10,TRPC6,CACNA1E,TMEM63B,CLCN4,TMEM120A,SCLT1,SLC1A5,APOL1,LAMP1,ORAI3,PANX1,PRKACA,SLC24A3,BAK1,PSEN1,P2RX1,KCNAB2,KCNJ15,CACNG8,SLC26A8,KCNJ2,SLC30A1,SLC1A7,ATP6V0C,PKD1,VAMP8,KCNE1,RRAD,CLCN7,KCNE3,CACNG4,TRPC4AP,ATP5MF,MCOLN2,ANXA2,ORAI1,FKBP1A,NOS1,CACNA1B,ATP6V1A,FGF13,ANO6,FXYD6,CALM2,SNF8,PANX2,BAX,MICU1,GLRX,LAMP2,VDAC2,CLCN3,VTI1B,CLCN5,KCNN3,CNGA1,HTR3A,KCNIP4,SLC24A1,TMC1,CAV1,GRIA…
GO:MF	signaling receptor regulator activity	GO:0030545	FALSE	1.74E-15	14.7583	583	3059	73	78724	SEMA4D,COPA,RETN,NRG1,GRN,PGLYRP1,SECTM1,BMP2,SEMA4A,APOA1,TNFSF18,CCL23,IL1B,LGALS1,APP,CMTM2,TNFSF12,CXCL14,LRPAP1,INHBA,IFNK,GMFG,CD274,RLN2,CD48,CXCL1,LILRB4,WNT6,INSL3,TNFSF14,TYMP,HSPA1A,APLN,FAM3D,FKBP1A,GFER,JAG1,C17ORF99,RABEP2,LYPD1,FGF13,TNFSF10,IL37,VEGFA,CLEC11A,SEMA3A,CXCL16,IL10,FGF16,GAS6,IL34,POMC,GDF15,GREM2,FAM3B,IL23A,CD80,LTA,WNT1,QRFP,SEMA3G,CCL17,FLT3LG,DPP4,CHGB,F2RL2,GAST…
GO:MF	electron transfer activity	GO:0009055	TRUE	3.73E-15	14.4278	114	3059	31	78724	CYBA,NCF1,NDUFB1,NDUFS2,NQO2,UQCR10,NDUFB4,ASPH,NDUFA1,DEGS1,NDUFV2,NDUFC1,NDUFC2,SRD5A1,STEAP4,GSR,NCF2,COX5A,COX6B1,NDOR1,NDUFB6,NDUFB3,COX8A,ALDH2,UQCR11,COX5B,UQCRFS1,NDUFS7,COX4I1,GLDC,HSD17B6
GO:MF	monosaccharide binding	GO:0048029	FALSE	4.43E-15	14.3536	77	3059	26	78724	HK2,HK3,ASGR2,RPIA,MANBA,IGF2R,EGLN1,SLC2A14,G6PD,TALDO1,SLC2A3,ASGR1,BSG,ALDOA,PLOD3,FBP1,PLOD2,GALK1,LMAN2,CLEC4A,PLOD1,CLEC4D,CD207,LMAN1,PFKP,CLEC4M
GO:MF	receptor ligand activity	GO:0048018	FALSE	4.53E-15	14.3438	539	3059	69	78724	SEMA4D,COPA,RETN,NRG1,GRN,PGLYRP1,SECTM1,BMP2,SEMA4A,APOA1,TNFSF18,CCL23,IL1B,LGALS1,APP,CMTM2,TNFSF12,CXCL14,LRPAP1,INHBA,IFNK,GMFG,CD274,RLN2,CD48,CXCL1,WNT6,INSL3,TNFSF14,TYMP,HSPA1A,APLN,FAM3D,GFER,JAG1,C17ORF99,RABEP2,FGF13,TNFSF10,IL37,VEGFA,CLEC11A,SEMA3A,CXCL16,IL10,FGF16,GAS6,IL34,POMC,GDF15,GREM2,FAM3B,IL23A,CD80,LTA,WNT1,QRFP,SEMA3G,CCL17,FLT3LG,DPP4,CHGB,F2RL2,GAST,IGF1,CMTM8,RLN1,EDN…
GO:MF	signaling receptor activator activity	GO:0030546	FALSE	8.98E-15	14.0469	546	3059	69	78724	SEMA4D,COPA,RETN,NRG1,GRN,PGLYRP1,SECTM1,BMP2,SEMA4A,APOA1,TNFSF18,CCL23,IL1B,LGALS1,APP,CMTM2,TNFSF12,CXCL14,LRPAP1,INHBA,IFNK,GMFG,CD274,RLN2,CD48,CXCL1,WNT6,INSL3,TNFSF14,TYMP,HSPA1A,APLN,FAM3D,GFER,JAG1,C17ORF99,RABEP2,FGF13,TNFSF10,IL37,VEGFA,CLEC11A,SEMA3A,CXCL16,IL10,FGF16,GAS6,IL34,POMC,GDF15,GREM2,FAM3B,IL23A,CD80,LTA,WNT1,QRFP,SEMA3G,CCL17,FLT3LG,DPP4,CHGB,F2RL2,GAST,IGF1,CMTM8,RLN1,EDN…
GO:MF	magnesium ion binding	GO:0000287	FALSE	9.69E-15	14.0136	231	3059	43	78724	NLRC4,MARK2,MAST3,EXTL3,TESC,PDXK,RP2,S100P,SRPK1,ATP11A,MAP3K6,ITPK1,TKT,SRPK2,PGM1,PRKACA,MSH6,ARF1,PLSCR1,MAP3K5,PINK1,STK4,MTHFD2,STK3,IRAK3,SPHK1,COMT,RAN,PPM1B,PAPOLA,IDH1,OXSR1,SUCLA2,PSPH,RPS6KA5,LRRK2,TSSK4,FAN1,NT5C1A,ATP8B2,PRPS1L1,OPA1,BRSK1
GO:MF	glycosyltransferase activity	GO:0016757	FALSE	1.09E-14	13.9641	275	3059	47	78724	B4GALT5,B3GALT4,EXTL3,CSGALNACT2,B3GNT8,GBA2,PARP10,UPP1,GBE1,GBGT1,FUT7,ARF4,GYG1,UGGT1,MGAT1,PARP9,DPY19L3,HEXB,CHPF2,B3GNT2,ST3GAL6,GLT1D1,PLOD3,PYGB,GALNT3,B3GNT5,TYMP,ST3GAL2,ZC3HAV1,B4GALT3,XYLT1,RFNG,PYGM,UGGT2,ST3GAL4,ST3GAL3,QPRT,LACC1,GALNT6,ST3GAL5,B3GALT2,GCNT3,ST6GALNAC1,FUT6,ST8SIA1,LALBA,ST6GALNAC5
GO:MF	ubiquitin-like protein binding	GO:0032182	FALSE	1.44E-14	13.8415	119	3059	31	78724	NSFL1C,RNF111,TOM1,RAD23A,RBCK1,TOLLIP,CUEDC1,SHARPIN,UBXN2B,RNF185,HSPB1,STAM2,NBR1,UBE2A,RNF31,USP25,CXCR4,RAE1,BUB3,SQSTM1,TSG101,FBXW7,MDM2,PML,ZFAND2B,NPLOC4,RAD23B,SMAD3,HABP4,USP13,UBAP1L
GO:MF	organic anion transmembrane transporter activity	GO:0008514	FALSE	1.72E-14	13.7632	267	3059	46	78724	SLC16A3,SLCO4C1,SLC36A1,SLC1A5,CEACAM1,SLC7A7,SLC2A1,PANX1,SLC43A2,SLC27A2,SLC25A22,SLC46A2,SLC4A8,SLC2A14,MFSD10,SLC38A2,SLC10A3,SLC19A1,SFXN5,SLC38A10,SLC2A3,SLC15A4,SLC38A6,SLC26A8,SLC1A7,SLC25A11,SLC17A5,MFSD2A,SLC6A13,SLC43A3,SLC25A44,SLC22A1,SLCO3A1,SLC7A5,SLC25A2,SLC4A10,SLC7A6,SLC10A1,SLC25A16,SLC27A5,GRIA4,SLC4A11,SLC22A8,SLC6A5,SLCO4A1,SLC25A15
GO:MF	cytokine receptor activity	GO:0004896	FALSE	2.05E-14	13.6875	104	3059	29	78724	IL17RA,GFRA3,GPR17,IL13RA1,CCRL2,IL10RB,CSF2RA,IFNAR1,GPR35,IFNGR2,CMKLR1,IL1R2,CXCR4,EPOR,CD44,CSF2RB,CCR2,IFNGR1,CD4,IL4R,MPL,CCR9,CCR6,CCR4,IL17REL,LEPR,IL7R,CXCR6,GPR15
GO:MF	primary active transmembrane transporter activity	GO:0015399	FALSE	3.05E-14	13.5157	167	3059	36	78724	NDUFB1,NDUFS2,ATP6V0E1,ATP6V0A1,TAP1,UQCR10,NDUFB4,NDUFA1,ATP6V1E1,NDUFV2,NDUFC1,ABCC6,NDUFC2,ABCA13,ATP6V0D1,COX5A,ATP6V0C,TCIRG1,COX6B1,ABCB6,ABCB10,NDUFB6,ATP6V1A,NDUFB3,ATP6V1B2,COX8A,ATP6V1C1,ATP6V0B,COX5B,UQCRFS1,NDUFS7,COX4I1,ABCA9,ATP6V1G2,ABCB9,ABCB4
GO:MF	catalytic activity, acting on a nucleic acid	GO:0140640	FALSE	3.83E-14	13.4163	645	3059	75	78724	RNASE2,RNASEL,UPF1,RFC2,RNASEK,JMJD6,DNASE2,ISG20,POLR2A,DDX23,TDRD9,CARS2,RNASE3,MSH6,RUVBL2,EXOSC4,TGS1,ANG,CHRAC1,MYD88,RAD9A,MRPL44,POLE4,POLR2J,XRN1,CNOT8,SMARCAL1,POLD4,DICER1,GGT1,POP7,POLB,RBBP8,MBLAC1,IARS2,PUS3,POLG,LACTB2,TOP1,RNASE4,PUSL1,RNASEH2A,DNMT1,YBEY,FMR1,POLR2E,MAU2,DHX30,VPS72,DHX58,DDX41,CDK7,SLU7,ALKBH5,WARS2,HELLS,FAN1,TOP1MT,CECR2,DNASE1L3,EP400,SMG6,ZC3H12D,MCM4,SRCAP,A…
GO:MF	sulfur compound binding	GO:1901681	FALSE	4.20E-14	13.3769	273	3059	46	78724	CHST15,MGST2,SELL,TKT,HMGCR,CCL23,PRSS57,GNS,APP,COL25A1,LTF,HADHA,ANG,LRPAP1,AAMP,CRISPLD2,ACADVL,P2RX1,CEL,PTPRF,FSTL1,CBS,CLEC3B,DBI,MPO,EFEMP2,SFRP1,COL28A1,GSTP1,APLP2,ELANE,LRP1,POSTN,PAFAH1B1,VEGFA,METTL17,COL5A1,GSTM1,GREM2,GSTM4,APLP1,GSTM2,FGFBP3,LIPG,COL13A1,SLIT2
GO:MF	cytokine binding	GO:0019955	FALSE	4.39E-14	13.3579	150	3059	34	78724	CASP1,TNFRSF1B,IL13RA1,CSF1R,ACKR1,CCRL2,MMP8,CSF2RA,IFNAR1,GBP1,TNFRSF14,IL1R2,CXCR4,TGFBR1,ELANE,ZFP36,ADAM17,ACVRL1,CCR2,IFNGR1,TCAP,BMPR1B,CD4,CCR9,CCR6,NLRP7,GREM2,CCR4,LEPR,CXCR6,KLHL20,A2M,GPR15,WFIKKN2
GO:MF	lipase activity	GO:0016298	FALSE	5.58E-14	13.2531	170	3059	36	78724	CES1,SMPDL3A,GM2A,LIPA,LYPLA2,BTK,PDGFRB,PRDX6,SMPD3,ARF4,ANXA4,ANXA5,NCEH1,PNPLA2,PLA2G15,CEL,ABHD3,PLBD1,ABHD2,CHRM3,MGLL,PLA2G4A,PDPK1,PROCA1,ANXA2,PGAP6,ANXA3,PLD1,PLD2,PLA2G7,PNPLA7,PLCH2,F2RL2,PNPLA5,LIPG,DDHD2
GO:MF	ubiquitin binding	GO:0043130	FALSE	6.38E-14	13.1954	100	3059	28	78724	NSFL1C,TOM1,RAD23A,RBCK1,TOLLIP,CUEDC1,SHARPIN,UBXN2B,RNF185,HSPB1,STAM2,NBR1,UBE2A,RNF31,USP25,CXCR4,RAE1,BUB3,SQSTM1,TSG101,FBXW7,MDM2,ZFAND2B,NPLOC4,RAD23B,SMAD3,USP13,UBAP1L
GO:MF	phosphatidylinositol phosphate binding	GO:1901981	FALSE	7.11E-14	13.148	181	3059	37	78724	TWF2,DENND1A,CAPG,ARAP1,ZFYVE1,TOM1,WIPI1,NLRP3,FLII,SLC9A1,SNX27,OSBPL5,SVIL,BTK,SAP30L,PLEKHB2,KCNJ2,RAB35,GAB2,PLA2G4A,TIRAP,GSN,SNX11,ANXA2,TTPAL,NCF4,SNX12,SH3PXD2B,WIPI2,PICALM,IQGAP1,SDCBP,ZFYVE16,OSBPL2,ARHGAP32,OBSCN,PLEKHN1
GO:MF	monoatomic ion channel activity	GO:0005216	FALSE	1.29E-13	12.8892	547	3059	67	78724	ANO10,TRPC6,CACNA1E,TMEM63B,CLCN4,TMEM120A,SCLT1,APOL1,LAMP1,ORAI3,PANX1,SLC24A3,PSEN1,P2RX1,KCNAB2,KCNJ15,CACNG8,SLC26A8,KCNJ2,SLC30A1,SLC1A7,ATP6V0C,PKD1,VAMP8,KCNE1,RRAD,CLCN7,KCNE3,CACNG4,TRPC4AP,ATP5MF,MCOLN2,ANXA2,ORAI1,NOS1,CACNA1B,ATP6V1A,FGF13,ANO6,FXYD6,CALM2,MICU1,GLRX,LAMP2,VDAC2,CLCN3,VTI1B,CLCN5,KCNN3,CNGA1,HTR3A,KCNIP4,SLC24A1,TMC1,CAV1,GRIA4,SLC4A11,MFSD8,CACNA1S,HTR1B,PTPN3,PKD1L…
GO:MF	microtubule binding	GO:0008017	FALSE	1.32E-13	12.8795	281	3059	46	78724	FBXW11,MAP4K4,MAP1S,CETN2,S100A8,CLIP1,REEP4,HAUS4,S100A9,NUSAP1,KIF3C,KIF13A,KIF13B,SPAST,RGS14,NDRG1,GABARAP,DCLK2,FES,MAP4,GAPDH,MAPRE1,RAE1,NDE1,POLB,KIF27,HOOK3,FGF13,REEP3,KIF1C,FMR1,PAFAH1B1,BCL2L11,LRRK2,TUBGCP5,CLIP3,BIRC5,GTSE1,KIF5C,MID1,EML6,NAV3,TUBGCP4,SPC24,KIF2A,OPA1
GO:MF	SH3 domain binding	GO:0017124	FALSE	2.07E-13	12.6843	121	3059	30	78724	CYBA,NCF1,DENND1A,HCLS1,INPP5D,ARHGAP1,WAS,GRB2,AKAP5,PLSCR1,QKI,ELMO2,PTPN6,ARHGAP27,DOCK4,RAD9A,PTPN12,SYNJ1,CASP9,VASP,SH3BP2,LYN,CBL,ADAM17,SH3KBP1,ADAM12,CNTNAP1,MAPK15,LRP2,SH3BGR
GO:MF	oxidoreductase activity, acting on CH-OH group of donors	GO:0016614	FALSE	5.46E-13	12.2625	134	3059	31	78724	PGD,HSD3B7,GPD2,AKR1A1,DHRS4,HMGCR,HADHB,HSD17B11,GMPR2,DHRS7,HSD17B4,G6PD,HADHA,CBR1,KCNAB2,IMPDH1,D2HGDH,LDHD,CTBP2,SPR,IDH1,LDHA,NSDHL,HSD17B10,MDH2,HSD17B3,CHDH,PTGR1,RDH13,HSD17B6,HSD17B2
GO:MF	protein phosphatase binding	GO:0019903	FALSE	8.04E-13	12.0949	145	3059	32	78724	CTNNB1,MVP,SMG5,SLC9A1,CSF1R,CEACAM1,PPP1R3D,GRB2,PXN,MTMR3,AKAP5,STYXL1,MAP3K5,PPP1R10,JAK3,IRS2,SPHK1,CSK,MAPK14,HSP90AA1,LILRB4,PPARG,STAU1,PPP6R1,PPP1R3B,PPP1CA,IQGAP1,PPP1R9B,STX17,CDH5,CD22,SLC6A3
GO:MF	hydrolase activity, hydrolyzing O-glycosyl compounds	GO:0004553	TRUE	8.21E-13	12.0857	93	3059	26	78724	GLA,MANBA,GBA2,HPSE,GM2A,MAN1A1,GBE1,CTBS,GUSB,NAGA,GANAB,HEXB,MGAM,NEU1,GLB1L3,CHIT1,NAGPA,MAN2B1,GAA,LCTL,SPACA3,OVGP1,CHIA,MANEA,OTOGL,LALBA
GO:MF	calcium-dependent protein binding	GO:0048306	FALSE	1.26E-12	11.8993	79	3059	24	78724	VPS37B,S100A12,S100P,SLC9A1,S100A8,VPS37C,S100A9,ANXA4,CLN3,S100A6,ANXA11,CALM3,SYN1,ANXA2,NOS1,S100A11,TSG101,ANXA3,CALM2,VLDLR,S100A10,S100PBP,A2M,CLEC4M
GO:MF	protein phosphorylated amino acid binding	GO:0045309	FALSE	1.92E-12	11.7177	59	3059	21	78724	SH2D3C,MAPK1,VAV1,SYK,GRB2,FGR,SLA,YWHAB,SHC1,PTPN6,YWHAZ,SHB,SH3BP2,CRKL,CBL,HCK,FBXW7,SCAF4,PTPN5,BCAR3,PTPN3
GO:MF	unfolded protein binding	GO:0051082	FALSE	2.03E-12	11.693	113	3059	28	78724	HSPA1L,RP2,TOR1A,TTC1,RUVBL2,UGGT1,HSPB1,HSP90AA1,DNAJB6,SIL1,HSPA6,HSPA1A,CCT7,HEATR3,PPIB,UGGT2,GRPEL1,HSPA1B,CALR,DNAJA1,NUDC,TUBB4B,HTRA2,CRYAA,DNAJA3,HYOU1,LMAN1,CCT6B
GO:MF	protein tyrosine kinase binding	GO:1990782	FALSE	6.63E-12	11.1788	127	3059	29	78724	NRG1,CEACAM3,CEACAM1,YWHAG,CEACAM4,GRB2,TJP2,SHC1,SH2B2,ELMO2,IRS2,DOCK4,CSK,MFAP3,DUSP3,HSP90AA1,NEDD9,PITPNM1,DOK2,GAB2,CRKL,CBL,SQSTM1,PITPNM2,CD4,GAS6,EPHA4,FLT3LG,CDH5
GO:MF	active monoatomic ion transmembrane transporter activity	GO:0022853	FALSE	6.68E-12	11.175	118	3059	28	78724	NDUFB1,NDUFS2,ATP6V0E1,ATP6V0A1,UQCR10,NDUFB4,NDUFA1,ATP6V1E1,NDUFV2,NDUFC1,NDUFC2,ATP6V0D1,COX5A,ATP6V0C,TCIRG1,COX6B1,NDUFB6,ATP6V1A,NDUFB3,ATP6V1B2,COX8A,ATP6V1C1,ATP6V0B,COX5B,UQCRFS1,NDUFS7,COX4I1,ATP6V1G2
GO:MF	endopeptidase inhibitor activity	GO:0004866	FALSE	8.81E-12	11.055	167	3059	33	78724	TIMP2,SERPINA1,SERPINB8,CARD16,APP,SPINT1,LTF,SLPI,CST7,SERPINB6,NAIP,TFPI,PI3,CSTA,GAPDH,SORL1,COL28A1,BST2,ANXA2,WFDC3,APLP2,SERPING1,XIAP,SPINT2,RENBP,SERPINA6,GBP2,SERPINB2,NLRP7,BIRC5,SPINK2,A2M,WFIKKN2
GO:MF	kinase regulator activity	GO:0019207	FALSE	9.81E-12	11.0083	278	3059	43	78724	MAP2K2,CCND3,MARK2,SH3BP5L,NRG1,TESC,CDKN2C,BMP2,YWHAG,YWHAB,LTF,PIK3R5,STK4,STK3,IRS2,MOB3A,CDK5R1,GMFG,HSPB1,RAC2,LILRB4,CCNI,MAP2K1,LYN,CALM3,GSTP1,ATG13,CCNK,CALM2,TRIB1,VEGFA,IQGAP1,INKA1,CDKN2D,HTRA2,LTK,GPRC5D,MOB3B,CAV1,CCND1,TRIB2,CCND2,RHOH
GO:MF	virus receptor activity	GO:0001618	FALSE	1.35E-11	10.8685	79	3059	23	78724	F11R,SELPLG,SLC1A5,LAMP1,PVR,PLSCR1,TNFRSF14,EFNB2,BSG,CXCR4,HSPA1A,NCAM1,SCARB2,ICAM1,CD4,HSPA1B,CD80,SLC10A1,DPP4,SLAMF1,CLEC4M,GPR15,AXL
GO:MF	Toll-like receptor binding	GO:0035325	FALSE	1.49E-11	10.827	13	3059	11	78724	S100A8,SYK,TOLLIP,S100A9,TLR2,TLR1,MYD88,LY96,UNC93B1,TIRAP,TLR6
GO:MF	modification-dependent protein binding	GO:0140030	FALSE	1.51E-11	10.8213	170	3059	33	78724	TOM1,RAD23A,YWHAG,VAV1,PARP10,MPND,MLLT1,PHF13,SHARPIN,BRD4,MSH6,PTPN6,KDM4A,PSMD4,PHF2,RNF31,MSL3,LYN,MORC3,SQSTM1,BRDT,THAP7,AGAP3,PHIP,FMR1,CBX1,CBX2,ZFAND2B,NPLOC4,BRD2,RAD23B,DZIP3,KMT2A
GO:MF	exogenous protein binding	GO:0140272	FALSE	1.83E-11	10.7376	80	3059	23	78724	F11R,SELPLG,SLC1A5,LAMP1,PVR,PLSCR1,TNFRSF14,EFNB2,BSG,CXCR4,HSPA1A,NCAM1,SCARB2,ICAM1,CD4,HSPA1B,CD80,SLC10A1,DPP4,SLAMF1,CLEC4M,GPR15,AXL
GO:MF	hydrolase activity, acting on glycosyl bonds	GO:0016798	FALSE	2.39E-11	10.6222	133	3059	29	78724	GLA,MANBA,GBA2,HPSE,GM2A,MAN1A1,GBE1,CTBS,TLR2,TLR1,GUSB,NAGA,GANAB,HEXB,MGAM,TLR6,NEU1,GLB1L3,CHIT1,NAGPA,MAN2B1,GAA,LCTL,SPACA3,OVGP1,CHIA,MANEA,OTOGL,LALBA
GO:MF	oxidoreductase activity, acting on the CH-OH group of donors, NAD or NADP as acceptor	GO:0016616	FALSE	2.57E-11	10.5906	124	3059	28	78724	PGD,HSD3B7,AKR1A1,DHRS4,HMGCR,HADHB,HSD17B11,GMPR2,DHRS7,HSD17B4,G6PD,HADHA,CBR1,KCNAB2,IMPDH1,LDHD,CTBP2,SPR,IDH1,LDHA,NSDHL,HSD17B10,MDH2,HSD17B3,PTGR1,RDH13,HSD17B6,HSD17B2
GO:MF	peptidase inhibitor activity	GO:0030414	FALSE	3.03E-11	10.5183	174	3059	33	78724	TIMP2,SERPINA1,SERPINB8,CARD16,APP,SPINT1,LTF,SLPI,CST7,SERPINB6,NAIP,TFPI,PI3,CSTA,GAPDH,SORL1,COL28A1,BST2,ANXA2,WFDC3,APLP2,SERPING1,XIAP,SPINT2,RENBP,SERPINA6,GBP2,SERPINB2,NLRP7,BIRC5,SPINK2,A2M,WFIKKN2
GO:MF	sterol binding	GO:0032934	FALSE	3.55E-11	10.4499	67	3059	21	78724	STAR,APOA1,TSPO,OSBPL5,SYP,NR1H3,OSBPL11,ERLIN1,OSBPL1A,STARD3,GRAMD1A,INSIG2,SCARB2,NPC2,VDAC2,OSBPL2,STARD5,GPR183,CAV1,RORA,RORC
GO:MF	calmodulin binding	GO:0005516	FALSE	4.09E-11	10.3881	208	3059	36	78724	ITPKC,SLC9A1,CEACAM1,MAPKAPK2,AKAP5,CAMKK2,PHKG1,SLC8A1,MYO1F,SPHK1,MYO9B,MYO7A,UBR4,RRAD,MAPKAPK3,PHKA2,ORAI1,NOS1,CNN2,MYO5A,DAPK2,CALD1,SNTB1,CAMK2G,BASP1,MARCKS,IQGAP1,SNTB2,PDE4DIP,KCNN3,MYO1C,PHKA1,CACNA1S,ASPM,OBSCN,MYLK2
GO:MF	steroid binding	GO:0005496	FALSE	4.10E-11	10.3874	108	3059	26	78724	STAR,VDR,APOA1,TSPO,OSBPL5,SYP,ESRRB,NR1H3,OSBPL11,ERLIN1,OSBPL1A,PAQR6,STARD3,ESRRA,GRAMD1A,INSIG2,SCARB2,NPC2,SERPINA6,VDAC2,OSBPL2,STARD5,GPR183,CAV1,RORA,RORC
GO:MF	transcription coregulator binding	GO:0001221	FALSE	5.16E-11	10.2873	118	3059	27	78724	CTNNB1,RXRA,BCL6,SMARCD3,HDAC5,CREBBP,PPARG,LMO2,HIF1A,SP1,LCOR,CTBP2,FAM89B,EPAS1,FOXO3,PAX6,THAP7,ATF7,SMAD3,MED1,ETS1,GATA3,RORA,TEAD2,TERT,ZNF547,EHMT2
GO:MF	solute:monoatomic cation symporter activity	GO:0015294	FALSE	5.16E-11	10.2873	118	3059	27	78724	SLC16A3,SLC36A1,SLC34A3,SLC15A3,SLC25A22,SLC12A9,SLC4A8,SLC38A2,SLC10A3,SLC15A4,SLC25A3,SLC1A7,SLC12A6,SLC5A9,SLC2A9,SLC17A5,MFSD2A,SLC6A13,SLC29A1,SLC28A3,SLC22A1,SLC4A10,SLC10A1,SLC6A2,SLC6A5,SLC34A1,SLC6A3
GO:MF	phospholipase activity	GO:0004620	FALSE	5.38E-11	10.2695	137	3059	29	78724	SMPDL3A,GM2A,LYPLA2,BTK,PDGFRB,PRDX6,SMPD3,ARF4,ANXA4,ANXA5,PNPLA2,PLA2G15,ABHD3,PLBD1,CHRM3,MGLL,PLA2G4A,PDPK1,PROCA1,ANXA2,PGAP6,ANXA3,PLD1,PLD2,PLA2G7,PNPLA7,PLCH2,F2RL2,LIPG
GO:MF	sodium ion transmembrane transporter activity	GO:0015081	FALSE	5.54E-11	10.2568	199	3059	35	78724	SCLT1,SLC34A3,SLC9A1,SLC24A3,SLC4A8,SLC8A1,SLC38A2,SLC10A3,SLC9A8,CNNM4,SLC1A7,SLC5A9,MFSD2A,SLC6A13,NOS1,FGF13,SLC29A1,FXYD6,SLC28A3,SLC9A9,SLC22A1,GLRX,SLC4A10,CNGA1,SLC24A1,SLC10A1,SLC6A2,SLC4A11,SLC6A5,SLC9A7,SLC34A1,PTPN3,SLC9B1,SLC6A3,SHROOM2
GO:MF	G protein-coupled receptor binding	GO:0001664	FALSE	5.66E-11	10.247	292	3059	43	78724	ARAP1,FCN1,ARRB1,GNA15,HOMER3,CCRL2,JAK2,CCL23,AKAP5,GNAI2,CNIH4,CXCL14,TYK2,CXCL1,VPS35,WNT6,PROK2,INSL3,PICK1,SFRP1,HSPA1A,PSMC5,APLN,SAG,CCR2,P2RY2,GNA13,CXCL16,HSPA1B,ARHGEF11,DNAJA1,SDCBP,POMC,PPP1R9B,APLP1,WNT1,QRFP,ARRDC3,CCL17,BICD1,S1PR1,EDN2,BAMBI
GO:MF	heat shock protein binding	GO:0031072	FALSE	1.11E-10	9.95466	131	3059	28	78724	FKBP4,HSPA1L,PGLYRP1,APOA1,DNAJB12,FKBP5,BAK1,GBP1,APAF1,HIF1A,ITGB2,METTL18,DNAJB6,LMAN2,HSPA6,HSPA1A,ZFP36,ITGAM,HSF1,USP19,BAX,HSPA1B,DNAJA1,DNAJA3,METTL21C,FICD,BCOR,AARSD1
GO:MF	oxidoreductase activity, acting on NAD(P)H	GO:0016651	FALSE	1.19E-10	9.92405	95	3059	24	78724	CYBA,NCF1,NDUFB1,NDUFS2,CYB5R3,TP53I3,NQO2,NDUFB4,DHRS4,NDUFA1,POR,NDUFV2,NDUFC1,CBR1,NDUFC2,NCF2,NDOR1,NDUFB6,NCF4,NDUFB3,SH3PXD2B,NDUFS7,CYB5R4,KMO
GO:MF	protein kinase regulator activity	GO:0019887	FALSE	1.53E-10	9.81425	240	3059	38	78724	MAP2K2,CCND3,MARK2,SH3BP5L,NRG1,TESC,CDKN2C,BMP2,YWHAG,YWHAB,LTF,STK4,STK3,MOB3A,CDK5R1,GMFG,HSPB1,RAC2,LILRB4,CCNI,MAP2K1,CALM3,ATG13,CCNK,CALM2,TRIB1,VEGFA,IQGAP1,INKA1,CDKN2D,HTRA2,LTK,GPRC5D,MOB3B,CAV1,CCND1,TRIB2,CCND2
GO:MF	ephrin receptor binding	GO:0046875	FALSE	2.86E-10	9.54422	28	3059	14	78724	ANKS1A,EFNA4,GRB2,SIPA1L1,SHC1,CDK5R1,EFNB2,EFNA3,LYN,CBL,PIK3CG,SDCBP,EPHA4,CHN1
GO:MF	organic cation transmembrane transporter activity	GO:0015101	FALSE	3.17E-10	9.49957	82	3059	22	78724	SLC36A1,SLC1A5,SLC7A7,SLC22A15,SLC43A2,SLC38A2,SLC22A16,SLC15A4,SLC22A4,SLC38A6,SLC44A1,SLC44A2,SLC22A1,SLC7A5,SLC25A2,SLC7A6,SLC6A2,SLC6A5,SLC19A3,SLC6A3,SLC25A15,SLC18A3
GO:MF	histone deacetylase binding	GO:0042826	FALSE	3.42E-10	9.46544	127	3059	27	78724	NACC2,MIER2,JDP2,SMG5,HDAC5,NACC1,MEF2A,SPI1,CEBPB,YWHAB,WDTC1,TRAF6,RAD9A,HSP90AA1,NCOR2,HIF1A,SP1,LCOR,HDAC4,HSPA1A,THAP7,ZBTB7B,HSPA1B,MEF2D,SUDS3,CCND1,BCOR
GO:MF	lyase activity	GO:0016829	FALSE	4.70E-10	9.32813	225	3059	36	78724	RNASE2,MGST2,OAZ2,MGST3,TBXAS1,HADHB,ALOXE3,PCBD1,HSD17B4,OAZ1,HADHA,ACO1,UROD,GGCX,TPI1,SDSL,ECHDC3,CSAD,ALDOA,PPCDC,CBS,SGPL1,CA4,RSAD2,CALM3,POLB,AUH,POLG,CALM2,GLDC,CHAC1,GSTM4,CA12,TSEN2,PDXDC1,ECHDC2
GO:MF	mRNA binding	GO:0003729	FALSE	4.72E-10	9.32582	389	3059	49	78724	SRSF4,DDX23,XPO5,TDRD7,EIF4E2,QKI,SLPI,EXOSC4,SRBD1,ACO1,CPEB4,HSP90AA1,SNRNP35,DAZAP1,CNBP,STRAP,SNRPC,STAU1,ZNF385A,NANOS3,CARHSP1,RC3H1,NUP98,CELF2,HNRNPC,TARDBP,TEX13B,HNRNPK,FXR2,RBM47,SAMD4A,AUH,ZFP36,SLC4A1AP,PCBP2,FMR1,EIF4G3,DDX41,CALR,LSM14B,HNRNPM,RNF40,LINC00240,CELF6,ZC3H12D,RBPMS2,ADARB1,DDX4,RBM24
GO:MF	monoatomic cation channel activity	GO:0005261	FALSE	4.73E-10	9.32545	430	3059	52	78724	ANO10,TRPC6,CACNA1E,TMEM63B,SCLT1,ORAI3,PANX1,SLC24A3,PSEN1,P2RX1,KCNAB2,KCNJ15,CACNG8,KCNJ2,SLC30A1,ATP6V0C,PKD1,KCNE1,RRAD,KCNE3,CACNG4,TRPC4AP,ATP5MF,MCOLN2,ANXA2,ORAI1,NOS1,CACNA1B,ATP6V1A,FGF13,ANO6,FXYD6,CALM2,MICU1,GLRX,KCNN3,CNGA1,HTR3A,KCNIP4,SLC24A1,TMC1,CAV1,SLC4A11,CACNA1S,HTR1B,PTPN3,PKD1L1,KCNA3,KCNH8,ITPR1,SHROOM2,DPP10
GO:MF	vitamin binding	GO:0019842	FALSE	6.14E-10	9.21197	150	3059	29	78724	TCN2,PDXK,RBP7,VDR,TKT,ALAS1,CISD1,MTARC1,EGLN1,FOLR1,SLC19A1,GGCX,TCN1,SDSL,CSAD,PLOD3,FOLR2,PYGB,PLOD2,CBS,SGPL1,PYGM,PLOD1,GLDC,SPTLC3,CYP2W1,RHO,CRABP2,PDXDC1
GO:MF	phosphotyrosine residue binding	GO:0001784	FALSE	6.20E-10	9.20768	47	3059	17	78724	SH2D3C,MAPK1,VAV1,SYK,GRB2,FGR,SLA,SHC1,PTPN6,SHB,SH3BP2,CRKL,CBL,HCK,PTPN5,BCAR3,PTPN3
GO:MF	carboxylic acid transmembrane transporter activity	GO:0046943	FALSE	8.65E-10	9.06313	184	3059	32	78724	SLC16A3,SLC36A1,SLC1A5,CEACAM1,SLC7A7,SLC2A1,SLC43A2,SLC27A2,SLC25A22,SLC38A2,SLC10A3,SLC19A1,SFXN5,SLC38A10,SLC15A4,SLC38A6,SLC26A8,SLC1A7,SLC25A11,SLC17A5,MFSD2A,SLC6A13,SLC43A3,SLC25A44,SLC7A5,SLC25A2,SLC7A6,SLC10A1,SLC27A5,GRIA4,SLC6A5,SLC25A15
GO:MF	oxidoreductase activity, acting on a sulfur group of donors	GO:0016667	FALSE	9.68E-10	9.01431	55	3059	18	78724	QSOX1,MSRA,MSRB2,IFI30,MSRB3,SESN2,SRXN1,P4HB,GSR,GSTO1,SUMF1,GFER,SUOX,TMX4,GLRX,TXNL1,TXNDC5,PDIA4
GO:MF	organic acid transmembrane transporter activity	GO:0005342	FALSE	1.01E-09	8.99708	185	3059	32	78724	SLC16A3,SLC36A1,SLC1A5,CEACAM1,SLC7A7,SLC2A1,SLC43A2,SLC27A2,SLC25A22,SLC38A2,SLC10A3,SLC19A1,SFXN5,SLC38A10,SLC15A4,SLC38A6,SLC26A8,SLC1A7,SLC25A11,SLC17A5,MFSD2A,SLC6A13,SLC43A3,SLC25A44,SLC7A5,SLC25A2,SLC7A6,SLC10A1,SLC27A5,GRIA4,SLC6A5,SLC25A15
GO:MF	flavin adenine dinucleotide binding	GO:0050660	FALSE	1.17E-09	8.93025	87	3059	22	78724	CYB5R3,QSOX1,NQO2,POR,MAOA,ACADVL,PIPOX,STEAP3,STEAP4,GSR,D2HGDH,DPYD,LDHD,NDOR1,GFER,KDM1B,ACADS,NOS1,ACADM,CHDH,MICAL3,KMO
GO:MF	cysteine-type endopeptidase activity	GO:0004197	FALSE	1.29E-09	8.89064	124	3059	26	78724	CTSD,CTSB,CAPNS2,CASP1,CTSS,CARD16,CARD8,LTF,GPAA1,CST7,NAIP,CAPN5,CSTA,CASP9,USP10,ATG4B,SFRP1,CAPN1,CTSO,CTSH,XIAP,SENP7,CFLAR,CASP7,BIRC5,USP13
GO:MF	glycosaminoglycan binding	GO:0005539	FALSE	2.24E-09	8.64928	249	3059	37	78724	PGLYRP1,SELL,CCL23,PRSS57,GNS,APP,TLR2,COL25A1,LTF,ANG,LRPAP1,AAMP,CRISPLD2,CEL,PTPRF,FSTL1,CLEC3B,HAPLN2,MPO,EFEMP2,SFRP1,COL28A1,CD44,APLP2,LYVE1,ELANE,POSTN,PAFAH1B1,VEGFA,COL5A1,GREM2,APLP1,FGFBP3,LIPG,COL13A1,HAPLN3,SLIT2
GO:MF	double-stranded RNA binding	GO:0003725	FALSE	2.35E-09	8.62821	73	3059	20	78724	TLR7,TLR8,EIF2AK2,ACTN1,SIDT2,MRPL44,MSN,STAU1,RC3H1,NLRP6,VIM,DICER1,TUBA1B,ZBP1,OAS1,DHX30,DHX58,ADAR,TUBB4B,ADARB1
GO:MF	carboxylic ester hydrolase activity	GO:0052689	FALSE	2.40E-09	8.62064	158	3059	29	78724	CES1,APMAP,LIPA,LYPLA2,PRDX6,AOAH,ACOT8,NCEH1,PNPLA2,PLA2G15,PGLS,CEL,ABHD3,ABHD2,MGLL,PLA2G4A,NDST1,PROCA1,ANXA2,PGAP6,ANXA3,ALDH2,PLA2G7,AADACL3,PNPLA7,PNPLA5,LIPG,DDHD2,BPHL
GO:MF	alcohol binding	GO:0043178	FALSE	2.46E-09	8.60904	90	3059	22	78724	TRPC6,STAR,RBP7,APOA1,TSPO,OSBPL5,SYP,NR1H3,CYTH2,ERLIN1,OSBPL1A,STARD3,GRAMD1A,SCARB2,NPC2,VDAC2,OSBPL2,STARD5,CYP2W1,CAV1,CRABP2,ITPR1
GO:MF	phospholipid transporter activity	GO:0005548	FALSE	3.08E-09	8.51115	66	3059	19	78724	ATP11A,ATG9A,C2CD2L,OSBPL5,TMEM30A,PLSCR1,PITPNM1,PITPNA,MFSD2A,PRELID1,CLPTM1L,ANO6,PITPNM2,VDAC2,OSBPL2,XKR8,ATP8B2,ABCB4,TMEM30B
GO:MF	growth factor receptor binding	GO:0070851	FALSE	3.29E-09	8.48323	139	3059	27	78724	GRB2,TOLLIP,PYCARD,JAK2,TLR5,IL1B,PDGFRB,SLA,TRIP6,SHC1,ARF4,PLSCR1,PSEN1,VAV3,MYD88,CD300LF,NPTN,LYN,ADAM17,IL37,VEGFA,IL10,FGF16,SDCBP,MS4A1,GATA3,CDH5
GO:MF	carboxylic acid binding	GO:0031406	FALSE	4.55E-09	8.34211	184	3059	31	78724	RXRA,FCN1,RBP7,VDR,SELL,S100A8,SESN2,SIGLEC5,S100A9,IGF2R,EGLN1,PSAP,FOLR1,SLC19A1,OXER1,PPARG,PLOD3,FOLR2,PLOD2,UBR2,GSTP1,PLOD1,NOS1,SELE,GLDC,SLC7A6,ID3,CYP2W1,GSTM2,CD22,CRABP2
GO:MF	DNA-binding transcription repressor activity	GO:0001217	FALSE	4.60E-09	8.33683	280	3059	39	78724	NACC2,ASCL2,JDP2,DEAF1,BCL6,PLAGL1,KLF16,NACC1,NFIL3,BACH1,SPI1,CEBPB,ZBTB45,MXD3,PPARG,HIF1A,SNAI3,ETV7,ZNF746,FOXO3,PAX6,MAX,HSF1,ZBTB7B,ZNF281,MAFK,PRDM16,SMAD3,ZNF85,GLIS1,KLF8,ZNF418,CUX2,GATA3,RORC,NR1D2,POU4F1,ZNF224,KLF12
GO:MF	organic acid binding	GO:0043177	FALSE	4.99E-09	8.3015	196	3059	32	78724	RXRA,FCN1,RBP7,VDR,SELL,S100A8,SESN2,SIGLEC5,S100A9,IGF2R,EGLN1,PSAP,FOLR1,SLC19A1,P2RX1,OXER1,PPARG,PLOD3,FOLR2,PLOD2,UBR2,GSTP1,PLOD1,NOS1,SELE,GLDC,SLC7A6,ID3,CYP2W1,GSTM2,CD22,CRABP2
GO:MF	cargo receptor activity	GO:0038024	FALSE	5.34E-09	8.27265	76	3059	20	78724	ASGR2,TMED1,TEX261,CD163,FOLR1,LRP10,ASGR1,FOLR2,ITGB2,APOBR,SORL1,LYVE1,SCARB2,ITGAM,LRP1,CXCL16,MIA3,VLDLR,OLR1,LRP2
GO:MF	NADP binding	GO:0050661	FALSE	5.85E-09	8.23283	53	3059	17	78724	TP53I3,PGD,HMGCR,POR,G6PD,LBR,SRD5A1,GSR,DPYD,GAPDH,SPR,IDH1,DECR1,NDOR1,NOS1,DHCR7,CRYM
GO:MF	heparin binding	GO:0008201	FALSE	7.28E-09	8.13807	176	3059	30	78724	SELL,CCL23,PRSS57,APP,COL25A1,LTF,ANG,LRPAP1,AAMP,CRISPLD2,CEL,PTPRF,FSTL1,CLEC3B,MPO,EFEMP2,SFRP1,COL28A1,APLP2,ELANE,POSTN,PAFAH1B1,VEGFA,COL5A1,GREM2,APLP1,FGFBP3,LIPG,COL13A1,SLIT2
GO:MF	O-acyltransferase activity	GO:0008374	FALSE	9.58E-09	8.01886	62	3059	18	78724	AGPAT2,AGPAT3,APOA1,PRDX6,MBOAT7,PNPLA2,PLA2G15,DGAT1,AGPAT1,LPCAT2,PLA2G4A,MBOAT2,DGAT2,LPCAT3,LPGAT1,HHAT,CROT,APOA4
GO:MF	nuclear receptor binding	GO:0016922	FALSE	1.67E-08	7.77837	138	3059	26	78724	CTNNB1,RXRA,FKBP4,MED16,WIPI1,VDR,SMARCD3,NCOA6,TRIP6,PADI2,TADA3,ASAH1,NCOR2,PPARG,NCOA2,HIF1A,LCOR,MED4,STAT5B,BUD31,NCOA7,TAF10,CALR,SMAD3,MED1,NCOA3
GO:MF	modified amino acid binding	GO:0072341	FALSE	1.88E-08	7.72469	99	3059	22	78724	MGST2,OSBPL5,SMPD3,FOLR1,ANXA4,ANXA5,SLC19A1,CD300LF,ANXA11,FOLR2,CBS,CD300A,ANXA2,SCARB2,ANXA3,GAS6,GSTM1,SYT17,GSTM4,GSTM2,PLEKHN1,AXL
GO:MF	molecular sequestering activity	GO:0140313	FALSE	3.50E-08	7.45561	51	3059	16	78724	LAPTM5,YWHAG,SESN2,EPN1,SPI1,LCN2,TCN1,YWHAZ,TMSB4X,INSIG2,SQSTM1,TSSC4,CALR,SDCBP,CAV1,PMEPA1
GO:MF	phosphatase regulator activity	GO:0019208	FALSE	3.73E-08	7.42789	112	3059	23	78724	LMTK2,SBF2,TESC,BMP2,PPP1R15B,STYXL1,PPP4R1,PPP1R7,EIF2AK2,PPP1R10,PPP1R12A,PPP2R5A,CALM3,SAG,PPP2R3B,LIMK2,PPP1R12C,CALM2,PPP6R1,PPP1R3B,PPP1R9B,PPP1R17,PPP3R2
GO:MF	catalytic activity, acting on RNA	GO:0140098	FALSE	4.09E-08	7.38775	411	3059	47	78724	RNASE2,RNASEL,UPF1,RNASEK,JMJD6,ISG20,POLR2A,DDX23,TDRD9,CARS2,RNASE3,EXOSC4,TGS1,ANG,MRPL44,POLR2J,XRN1,CNOT8,DICER1,GGT1,POP7,MBLAC1,IARS2,PUS3,LACTB2,RNASE4,PUSL1,RNASEH2A,YBEY,FMR1,POLR2E,DHX30,DHX58,DDX41,SLU7,ALKBH5,WARS2,SMG6,ZC3H12D,AARSD1,TRMT2B,DIS3L,TSEN2,TERT,ELAC1,DDX4,EXO1
GO:MF	antioxidant activity	GO:0016209	FALSE	4.92E-08	7.30843	85	3059	20	78724	MGST2,MGST1,MGST3,HP,SESN2,PRDX6,S100A9,PRDX1,SRXN1,PRDX5,IPCEF1,PRDX2,GSR,GPX3,GSTO1,MPO,GSTP1,LRRK2,GSTM2,APOA4
GO:MF	non-membrane spanning protein tyrosine kinase activity	GO:0004715	FALSE	5.26E-08	7.27913	45	3059	15	78724	PRKCD,SYK,FGR,JAK2,BTK,EIF2AK2,JAK3,TYK2,CSK,BMX,FES,STK16,LYN,BAZ1B,HCK
GO:MF	macromolecular conformation isomerase activity	GO:0120543	FALSE	5.34E-08	7.27248	290	3059	38	78724	UPF1,RFC2,DDX23,TDRD9,RUVBL2,KIF3C,MYO1F,KIF13A,KIF13B,SPAST,MYO9B,MYO7A,PSMC3,SMARCAL1,DICER1,PSMC5,KIF27,MYO7B,TOP1,KIF1C,MYO5A,FMR1,PSMC2,DHX30,DHX58,DDX41,DNAH8,HELLS,TOP1MT,DNAI2,EP400,MCM4,MYO1C,KIF5C,SRCAP,MCM2,DDX4,KIF2A
GO:MF	cholesterol binding	GO:0015485	FALSE	6.73E-08	7.17188	53	3059	16	78724	STAR,APOA1,TSPO,OSBPL5,SYP,NR1H3,ERLIN1,OSBPL1A,STARD3,GRAMD1A,SCARB2,NPC2,VDAC2,OSBPL2,STARD5,CAV1
GO:MF	histone binding	GO:0042393	FALSE	7.85E-08	7.10533	242	3059	34	78724	JAK2,MLLT1,PHF13,BRD4,MSH6,SAP30L,PARP9,DTX3L,WDTC1,KDM4A,PHF2,HIRA,TBL1X,MSL3,BAZ1B,MORC3,HDAC4,NPM2,KDM1B,BRDT,ANP32A,THAP7,PHIP,FMR1,CBX1,CBX2,VPS72,BRD2,PHC2,AIRE,SRCAP,KMT2A,MCM2,TSPYL5
GO:MF	structural molecule activity	GO:0005198	FALSE	9.84E-08	7.00721	1106	3059	89	78724	COPA,EMILIN2,ARPC2,LAMB3,NUP214,UBA52,ANKRD2,ASPH,PANX1,CLTA,PSMD13,COL25A1,TMEM30A,TGFBI,COL8A2,SMTN,ACTG1,SRBD1,ACTN1,CHADL,DCTN3,MRPL11,FGL2,MARVELD1,ACTR2,MSN,OLFM4,MALL,PI3,MMRN1,DAP3,NUP98,TGM3,MAP4,SPTB,LUM,MOBP,VIM,EFEMP2,MYL3,COL28A1,TUBA4A,MRPL21,JAG1,RPL39L,TUBA1B,MRPL16,ACTR3,POSTN,COPG2,MYL11,COL16A1,TCAP,B2M,COPB2,SNTB1,PANX2,METTL17,CD4,COL6A6,RPL26L1,ARPC3,MRPL17,EPB41L3,TUBB4B,MR…
GO:MF	inorganic anion transmembrane transporter activity	GO:0015103	FALSE	1.22E-07	6.91279	173	3059	28	78724	ANO10,CLCN4,APOL1,SLC34A3,SLC12A9,SLC4A8,ABCC6,SLC26A8,SLC25A3,SLC1A7,SLC12A6,SLC25A11,VAMP8,CLCN7,SLC6A13,SLC25A14,ANO6,SLC22A1,CLCN3,VTI1B,CLCN5,SLC4A10,SLC6A2,SLC4A11,MFSD8,SLC22A8,SLC34A1,SLC6A3
GO:MF	lipid transfer activity	GO:0120013	FALSE	1.27E-07	6.89728	63	3059	17	78724	STAR,APOA1,C2CD2L,TSPO,OSBPL5,CLN3,OSBPL1A,PITPNM1,STARD3,PITPNA,GRAMD1A,NPC2,PRELID1,PITPNM2,OSBPL2,STARD5,APOA4
GO:MF	pattern recognition receptor activity	GO:0038187	FALSE	1.33E-07	6.87746	34	3059	13	78724	FCN1,PGLYRP1,TLR7,TLR8,TLR5,CLEC4E,CARD8,TLR2,TRIM5,LY96,NLRP6,CD14,CLEC4D
GO:MF	cysteine-type endopeptidase regulator activity involved in apoptotic process	GO:0043028	FALSE	1.56E-07	6.80744	41	3059	14	78724	CASP1,CTSS,PYCARD,CARD8,PRDX5,APAF1,NAIP,TNFSF14,NLRP12,BID,CTSH,XIAP,GAS6,CD27
GO:MF	calcium ion transmembrane transporter activity	GO:0015085	FALSE	1.67E-07	6.77822	187	3059	29	78724	TRPC6,CACNA1E,ORAI3,GHITM,PANX1,SLC24A3,SLC8A1,PSEN1,P2RX1,CACNG8,SLC30A1,PKD1,RRAD,CACNG4,TRPC4AP,MCOLN2,ANXA2,ORAI1,NOS1,CACNA1B,CALM2,MICU1,CNGA1,SLC24A1,TMC1,CACNA1S,HTR1B,PKD1L1,ITPR1
GO:MF	peptidase activator activity	GO:0016504	FALSE	1.69E-07	6.77189	56	3059	16	78724	NLRC4,CASP1,PSENEN,CTSS,PYCARD,PSME1,CARD8,PINK1,PSME2,APH1B,APAF1,VSIR,NLRP12,CTSH,DMWD,CAV1
GO:MF	hexosyltransferase activity	GO:0016758	FALSE	1.90E-07	6.72171	200	3059	30	78724	B4GALT5,B3GALT4,EXTL3,CSGALNACT2,B3GNT8,GBA2,GBE1,GBGT1,FUT7,GYG1,UGGT1,MGAT1,DPY19L3,HEXB,CHPF2,B3GNT2,PLOD3,PYGB,GALNT3,B3GNT5,TYMP,B4GALT3,RFNG,PYGM,UGGT2,GALNT6,B3GALT2,GCNT3,FUT6,LALBA
GO:MF	cytokine activity	GO:0005125	FALSE	2.07E-07	6.68332	238	3059	33	78724	NRG1,GRN,SECTM1,BMP2,TNFSF18,CCL23,IL1B,CMTM2,TNFSF12,CXCL14,INHBA,IFNK,CXCL1,WNT6,TNFSF14,FAM3D,C17ORF99,TNFSF10,IL37,VEGFA,CXCL16,IL10,IL34,GDF15,GREM2,FAM3B,IL23A,LTA,WNT1,CCL17,FLT3LG,CMTM8,BMP10
GO:MF	transporter regulator activity	GO:0141108	FALSE	2.63E-07	6.58038	167	3059	27	78724	SCLT1,LAMP1,ATP6AP1,PRKACA,KCNAB2,CACNG8,SLC30A1,VAMP8,KCNE1,RRAD,KCNE3,CACNG4,FKBP1A,NOS1,FGF13,FXYD6,CALM2,SNF8,MICU1,GLRX,LAMP2,VTI1B,KCNIP4,CAV1,PTPN3,ITPR1,DPP10
GO:MF	oxidoreduction-driven active transmembrane transporter activity	GO:0015453	FALSE	2.82E-07	6.55036	66	3059	17	78724	NDUFB1,NDUFS2,UQCR10,NDUFB4,NDUFA1,NDUFV2,NDUFC1,NDUFC2,COX5A,COX6B1,NDUFB6,NDUFB3,COX8A,COX5B,UQCRFS1,NDUFS7,COX4I1
GO:MF	signaling receptor complex adaptor activity	GO:0030159	FALSE	2.86E-07	6.54425	50	3059	15	78724	GRB10,GRB2,GNB4,GNB2,SHC1,GNB1,SH2B2,IRS2,RGS14,SHB,DOK2,GAB2,DEDD2,LRRK2,CD3G
GO:MF	calcium channel activity	GO:0005262	FALSE	3.46E-07	6.46135	169	3059	27	78724	TRPC6,CACNA1E,ORAI3,PANX1,SLC24A3,PSEN1,P2RX1,CACNG8,SLC30A1,PKD1,RRAD,CACNG4,TRPC4AP,MCOLN2,ANXA2,ORAI1,NOS1,CACNA1B,CALM2,MICU1,CNGA1,SLC24A1,TMC1,CACNA1S,HTR1B,PKD1L1,ITPR1
GO:MF	catalytic activity, acting on DNA	GO:0140097	FALSE	5.43E-07	6.265	260	3059	34	78724	UPF1,RFC2,DNASE2,ISG20,MSH6,RUVBL2,CHRAC1,MYD88,RAD9A,POLE4,SMARCAL1,POLD4,DICER1,POLB,RBBP8,POLG,TOP1,DNMT1,MAU2,DHX30,VPS72,CDK7,HELLS,FAN1,TOP1MT,CECR2,DNASE1L3,EP400,MCM4,SRCAP,TERT,MCM2,EXO1,MSH5
GO:MF	proton-transporting ATPase activity, rotational mechanism	GO:0046961	FALSE	5.52E-07	6.25797	25	3059	11	78724	ATP6V0E1,ATP6V0A1,ATP6V1E1,ATP6V0D1,ATP6V0C,TCIRG1,ATP6V1A,ATP6V1B2,ATP6V1C1,ATP6V0B,ATP6V1G2
GO:MF	ATPase-coupled ion transmembrane transporter activity	GO:0042625	FALSE	5.52E-07	6.25797	25	3059	11	78724	ATP6V0E1,ATP6V0A1,ATP6V1E1,ATP6V0D1,ATP6V0C,TCIRG1,ATP6V1A,ATP6V1B2,ATP6V1C1,ATP6V0B,ATP6V1G2
GO:MF	ATPase activity, coupled to transmembrane movement of ions, rotational mechanism	GO:0044769	FALSE	5.52E-07	6.25797	25	3059	11	78724	ATP6V0E1,ATP6V0A1,ATP6V1E1,ATP6V0D1,ATP6V0C,TCIRG1,ATP6V1A,ATP6V1B2,ATP6V1C1,ATP6V0B,ATP6V1G2
GO:MF	D-mannose binding	GO:0005537	FALSE	5.52E-07	6.25797	25	3059	11	78724	ASGR2,MANBA,IGF2R,ASGR1,BSG,LMAN2,CLEC4A,CLEC4D,CD207,LMAN1,CLEC4M
GO:MF	acylglycerol O-acyltransferase activity	GO:0016411	FALSE	5.63E-07	6.24977	31	3059	12	78724	AGPAT2,AGPAT3,MBOAT7,PNPLA2,PLA2G15,DGAT1,AGPAT1,LPCAT2,MBOAT2,DGAT2,LPCAT3,LPGAT1
GO:MF	ribonucleoprotein complex binding	GO:0043021	FALSE	6.73E-07	6.17216	174	3059	27	78724	RNASEL,XPO5,BOP1,CPEB4,EIF6,RNF135,EIF1B,STRAP,SNRPB,EIF1,RBM23,PRMT5,ZNF622,MDM2,NCLN,SRP68,FMR1,TMEM147,CINP,PELO,PPP1CA,PES1,SMG6,SNRPN,HABP4,DERL3,TTC5
GO:MF	RNA nuclease activity	GO:0004540	FALSE	8.39E-07	6.0762	130	3059	23	78724	RNASE2,RNASEL,RNASEK,ISG20,RNASE3,EXOSC4,ANG,MRPL44,XRN1,CNOT8,DICER1,POP7,MBLAC1,LACTB2,RNASE4,RNASEH2A,YBEY,SMG6,ZC3H12D,DIS3L,TSEN2,ELAC1,EXO1
GO:MF	channel regulator activity	GO:0016247	FALSE	9.72E-07	6.01213	165	3059	26	78724	SCLT1,LAMP1,PRKACA,KCNAB2,CACNG8,SLC30A1,VAMP8,KCNE1,RRAD,KCNE3,CACNG4,FKBP1A,NOS1,FGF13,FXYD6,CALM2,SNF8,MICU1,GLRX,LAMP2,VTI1B,KCNIP4,CAV1,PTPN3,ITPR1,DPP10
GO:MF	protein serine/threonine phosphatase activity	GO:0004722	FALSE	1.1437E-06	5.94169	132	3059	23	78724	PTEN,DUSP23,PPP1R3D,MTMR3,UBLCP1,FIG4,CTDSP1,DUSP3,PPM1D,DUSP6,PPM1B,SSH1,DUSP1,CTDP1,BCKDK,CAMK2G,CTDSP2,PPP1CA,PPP1CB,DUSP13B,PPP1R17,DUSP4,PPP3R2
GO:MF	receptor tyrosine kinase binding	GO:0030971	FALSE	1.16908E-06	5.93216	81	3059	18	78724	NRG1,YWHAG,GRB2,SHC1,SH2B2,ELMO2,IRS2,DOCK4,DUSP3,PITPNM1,DOK2,GAB2,CRKL,CBL,SQSTM1,PITPNM2,GAS6,FLT3LG
GO:MF	DNA-binding transcription repressor activity, RNA polymerase II-specific	GO:0001227	FALSE	1.46573E-06	5.83394	270	3059	34	78724	NACC2,ASCL2,JDP2,DEAF1,BCL6,PLAGL1,KLF16,NACC1,NFIL3,BACH1,CEBPB,ZBTB45,MXD3,PPARG,SNAI3,ETV7,ZNF746,FOXO3,PAX6,MAX,HSF1,ZNF281,MAFK,PRDM16,ZNF85,GLIS1,KLF8,CUX2,GATA3,RORC,NR1D2,POU4F1,ZNF224,KLF12
GO:MF	G protein-coupled chemoattractant receptor activity	GO:0001637	FALSE	1.50274E-06	5.82312	27	3059	11	78724	GPR17,CCRL2,GPR35,CMKLR1,CXCR4,CCR2,CCR9,CCR6,CCR4,CXCR6,GPR15
GO:MF	chemokine receptor activity	GO:0004950	FALSE	1.50274E-06	5.82312	27	3059	11	78724	GPR17,CCRL2,GPR35,CMKLR1,CXCR4,CCR2,CCR9,CCR6,CCR4,CXCR6,GPR15
GO:MF	nuclear export signal receptor activity	GO:0005049	FALSE	1.51824E-06	5.81866	12	3059	8	78724	NUP214,XPO5,RAN,XPO7,CALR,XPO6,XPO1,XPO4
GO:MF	integrin binding	GO:0005178	FALSE	1.82874E-06	5.73785	158	3059	25	78724	F11R,NRG1,LCP1,SYK,CD151,FERMT3,IL1B,NF2,TGFBI,ACTN1,ICAM3,P4HB,ITGB2,TSPAN4,LYN,ADAM17,ITGAM,ICAM5,ICAM1,COL16A1,CALR,COL5A1,ADAM23,IGF1,LAMA5
GO:MF	SH2 domain binding	GO:0042169	FALSE	1.95103E-06	5.70974	41	3059	13	78724	SYK,JAK2,SYP,SH2B2,PTPN6,CTR9,LAT2,SQSTM1,SH3PXD2B,LAX1,SLAMF1,SYNGR3,SHCBP1
GO:MF	histone modifying activity	GO:0140993	FALSE	2.25474E-06	5.6469	196	3059	28	78724	JMJD6,PCGF3,CREBBP,JAK2,SETDB1,NAA60,PADI2,DTX3L,KDM4A,PHF2,KDM4B,PADI4,BAZ1B,UBR2,BRPF3,KDM1B,PRMT5,SETD1A,TAF10,PRDM16,KDM6B,RPS6KA5,KAT6B,CHEK1,SRCAP,KMT2A,NCOA3,EHMT2
GO:MF	metal cation:monoatomic cation antiporter activity	GO:0140828	FALSE	2.72464E-06	5.56469	42	3059	13	78724	SLC9A1,GHITM,SLC24A3,SLC4A8,SLC8A1,SLC9A8,SLC30A1,SLC11A1,SLC9A9,SLC4A10,SLC24A1,SLC9A7,SLC9B1
GO:MF	RNA polymerase binding	GO:0070063	FALSE	2.81426E-06	5.55064	58	3059	15	78724	PHRF1,BRD4,ESRRB,PAF1,CTR9,BRCA1,WAC,MAF1,ZFP36,PPIB,PABPN1,TAF10,SCAF4,RRN3,NCOA3
GO:MF	protein heterodimerization activity	GO:0046982	FALSE	3.06119E-06	5.51411	363	3059	40	78724	CYBA,RRAGD,JDP2,RALGAPA2,MEF2A,BAK1,CHRAC1,IRAK3,DDIT3,POLE4,CEACAM6,P4HB,GCA,CEACAM8,HIF1A,RAN,EPAS1,RRAGA,ATF6,FXR2,TAF12,TLR6,HSF1,PRMT5,DGKD,FMR1,PAFAH1B1,BAX,NFYC,MICU1,TAF4,MEF2D,SDCBP,GADD45A,LSM6,TAF8,TCF4,CAV1,TAF4B,BARD1
GO:MF	nuclease activity	GO:0004518	FALSE	3.30756E-06	5.48049	225	3059	30	78724	RNASE2,RNASEL,RNASEK,DNASE2,ISG20,RNASE3,PLSCR1,EXOSC4,ANG,RAD9A,MRPL44,XRN1,CNOT8,DICER1,POP7,RBBP8,MBLAC1,POLG,LACTB2,RNASE4,RNASEH2A,YBEY,FAN1,DNASE1L3,SMG6,ZC3H12D,DIS3L,TSEN2,ELAC1,EXO1
GO:MF	metallopeptidase activity	GO:0008237	FALSE	3.98804E-06	5.39924	201	3059	28	78724	RNPEPL1,TIMP2,MPND,MMP8,CHMP1A,MEP1A,CPXM2,RNPEP,NPEPL1,DPP3,MMP9,ECE2,ZMPSTE24,BST2,ADAM17,CPM,YBEY,CNDP2,ADAM8,NAALADL1,LAP3,ADAM12,ADAM20,ADAM28,ADAM23,MMP11,STAMBPL1,AGBL2
GO:MF	monoatomic anion transmembrane transporter activity	GO:0008509	FALSE	4.49422E-06	5.34735	153	3059	24	78724	ANO10,CLCN4,APOL1,PANX1,SLC12A9,SLC4A8,SLC19A1,SLC26A8,SLC1A7,SLC12A6,VAMP8,CLCN7,SLC6A13,SLC25A14,ANO6,SLC22A1,VDAC2,CLCN3,VTI1B,CLCN5,SLC4A10,SLC6A2,MFSD8,SLC6A3
GO:MF	SMAD binding	GO:0046332	FALSE	5.53419E-06	5.25695	79	3059	17	78724	RANBP3,CTNNB1,RNF111,ZC3H3,MEF2A,SMAD1,PPARG,TGFBR1,PAX6,ZMIZ1,FKBP1A,ACVRL1,BMPR1B,PML,TRIM33,SMAD3,PMEPA1
GO:MF	RNA endonuclease activity	GO:0004521	FALSE	5.53419E-06	5.25695	79	3059	17	78724	RNASE2,RNASEL,RNASEK,ANG,MRPL44,DICER1,POP7,MBLAC1,LACTB2,RNASE4,RNASEH2A,YBEY,SMG6,ZC3H12D,TSEN2,ELAC1,EXO1
GO:MF	protein sequestering activity	GO:0140311	FALSE	5.65205E-06	5.24779	30	3059	11	78724	LAPTM5,YWHAG,SESN2,SPI1,YWHAZ,TMSB4X,INSIG2,SQSTM1,SDCBP,CAV1,PMEPA1
GO:MF	cysteine-type peptidase activity	GO:0008234	FALSE	7.50674E-06	5.12455	233	3059	30	78724	CTSD,CTSB,CAPNS2,CASP1,CTSS,CARD16,CARD8,LTF,VCPIP1,GPAA1,CST7,NAIP,USP25,CAPN5,CSTA,CASP9,USP10,ATG4B,SFRP1,SCRN2,USP19,CAPN1,CTSO,CTSH,XIAP,SENP7,CFLAR,CASP7,BIRC5,USP13
GO:MF	ATPase-coupled transmembrane transporter activity	GO:0042626	FALSE	7.91053E-06	5.10179	101	3059	19	78724	ATP6V0E1,ATP6V0A1,TAP1,ATP6V1E1,ABCC6,ABCA13,ATP6V0D1,ATP6V0C,TCIRG1,ABCB6,ABCB10,ATP6V1A,ATP6V1B2,ATP6V1C1,ATP6V0B,ABCA9,ATP6V1G2,ABCB9,ABCB4
GO:MF	protein kinase activator activity	GO:0030295	FALSE	8.00816E-06	5.09647	134	3059	22	78724	MAP2K2,CCND3,MARK2,NRG1,BMP2,LTF,STK4,STK3,MOB3A,CDK5R1,MAP2K1,CALM3,ATG13,CCNK,CALM2,VEGFA,IQGAP1,LTK,GPRC5D,MOB3B,CCND1,CCND2
GO:MF	solute:sodium symporter activity	GO:0015370	FALSE	8.26144E-06	5.08294	81	3059	17	78724	SLC34A3,SLC4A8,SLC38A2,SLC10A3,SLC1A7,SLC5A9,MFSD2A,SLC6A13,SLC29A1,SLC28A3,SLC22A1,SLC4A10,SLC10A1,SLC6A2,SLC6A5,SLC34A1,SLC6A3
GO:MF	endonuclease activity	GO:0004519	FALSE	9.21708E-06	5.03541	135	3059	22	78724	RNASE2,RNASEL,RNASEK,DNASE2,RNASE3,ANG,MRPL44,DICER1,POP7,RBBP8,MBLAC1,LACTB2,RNASE4,RNASEH2A,YBEY,FAN1,DNASE1L3,SMG6,ZC3H12D,TSEN2,ELAC1,EXO1
GO:MF	UDP-glycosyltransferase activity	GO:0008194	FALSE	9.66835E-06	5.01465	147	3059	23	78724	B4GALT5,B3GALT4,EXTL3,CSGALNACT2,B3GNT8,GBGT1,GYG1,UGGT1,MGAT1,HEXB,CHPF2,B3GNT2,PLOD3,GALNT3,B3GNT5,B4GALT3,XYLT1,RFNG,UGGT2,GALNT6,B3GALT2,GCNT3,LALBA
GO:MF	C-C chemokine binding	GO:0019957	FALSE	1.01291E-05	4.99443	25	3059	10	78724	ACKR1,CCRL2,CXCR4,ZFP36,CCR2,CCR9,CCR6,CCR4,CXCR6,GPR15
GO:MF	serine-type endopeptidase inhibitor activity	GO:0004867	FALSE	1.10683E-05	4.95592	103	3059	19	78724	SERPINA1,SERPINB8,APP,SPINT1,SLPI,SERPINB6,TFPI,PI3,COL28A1,ANXA2,WFDC3,APLP2,SERPING1,SPINT2,SERPINA6,SERPINB2,SPINK2,A2M,WFIKKN2
GO:MF	nucleocytoplasmic carrier activity	GO:0140142	FALSE	1.24233E-05	4.90576	32	3059	11	78724	NUP214,XPO5,RAN,XPO7,KPNA4,TNPO3,CALR,XPO6,XPO1,XPO4,IPO4
GO:MF	oxidoreductase activity, acting on paired donors, with incorporation or reduction of molecular oxygen	GO:0016705	FALSE	1.27533E-05	4.89438	186	3059	26	78724	JMJD6,ASPH,TBXAS1,DEGS1,PCBD1,EGLN1,KDM4A,PHF2,HSP90AA1,TMLHE,P4HB,PLOD3,KDM4B,PLOD2,KDM1B,CYP2C9,PLOD1,NOS1,KDM6B,ALKBH5,FA2H,CYP2W1,CYP2D6,MICAL3,CYP3A43,KMO
GO:MF	protein tyrosine phosphatase activity	GO:0004725	FALSE	1.30496E-05	4.8844	104	3059	19	78724	PTEN,DUSP23,PTPRE,UBASH3B,MTMR3,PTPN23,PTPN6,PTPN12,DUSP3,PTPRF,DUSP6,SSH1,DUSP1,PTPN18,DUSP13B,PTPN13,DUSP4,PTPN5,PTPN3
GO:MF	chloride transmembrane transporter activity	GO:0015108	FALSE	1.4996E-05	4.82402	127	3059	21	78724	ANO10,CLCN4,APOL1,SLC12A9,SLC4A8,SLC26A8,SLC1A7,SLC12A6,VAMP8,CLCN7,SLC6A13,SLC25A14,ANO6,SLC22A1,CLCN3,VTI1B,CLCN5,SLC4A10,SLC6A2,MFSD8,SLC6A3
GO:MF	lipopolysaccharide binding	GO:0001530	FALSE	1.60811E-05	4.79369	40	3059	12	78724	CAMP,RNASE3,TLR2,LTF,BPI,GBP1,LY96,NLRP6,PSMB4,CD14,NINJ1,BPIFC
GO:MF	peroxidase activity	GO:0004601	FALSE	1.89529E-05	4.72232	57	3059	14	78724	MGST2,MGST1,MGST3,SESN2,PRDX6,PRDX1,PRDX5,IPCEF1,PRDX2,GPX3,MPO,GSTP1,LRRK2,GSTM2
GO:MF	PDZ domain binding	GO:0030165	FALSE	2.12893E-05	4.67184	86	3059	17	78724	MAP2K2,PTEN,F11R,PSEN1,DOCK4,SLC22A4,TMEM88,FZD2,GNG5,ADAM17,LIN7B,SNTB1,CLCN3,DTNA,LPAR2,SSTR2,SLC34A1
GO:MF	tetrapyrrole binding	GO:0046906	FALSE	2.36772E-05	4.62567	154	3059	23	78724	CYBA,TCN2,HEBP1,BACH1,JAK2,TBXAS1,TCN1,STEAP3,STEAP4,EIF2AK1,CBS,MPO,ABCB6,SUOX,CYP2C9,NOS1,SLC48A1,CYB5R4,FA2H,CYP2W1,CYP2D6,CYP3A43,IDO2
GO:MF	kinase activator activity	GO:0019209	FALSE	2.3725E-05	4.62479	142	3059	22	78724	MAP2K2,CCND3,MARK2,NRG1,BMP2,LTF,STK4,STK3,MOB3A,CDK5R1,MAP2K1,CALM3,ATG13,CCNK,CALM2,VEGFA,IQGAP1,LTK,GPRC5D,MOB3B,CCND1,CCND2
GO:MF	oxidoreductase activity, acting on NAD(P)H, quinone or similar compound as acceptor	GO:0016655	FALSE	2.40879E-05	4.6182	58	3059	14	78724	NDUFB1,NDUFS2,TP53I3,NQO2,NDUFB4,DHRS4,NDUFA1,NDUFV2,NDUFC1,CBR1,NDUFC2,NDUFB6,NDUFB3,NDUFS7
GO:MF	chemokine binding	GO:0019956	FALSE	2.56369E-05	4.59113	34	3059	11	78724	ACKR1,CCRL2,CXCR4,ZFP36,CCR2,CCR9,CCR6,CCR4,CXCR6,A2M,GPR15
GO:MF	carbohydrate kinase activity	GO:0019200	FALSE	2.62793E-05	4.58039	21	3059	9	78724	HK2,HK3,PFKFB4,RBKS,GALK2,GALK1,NAGK,PFKFB3,PFKP
GO:MF	amino acid transmembrane transporter activity	GO:0015171	FALSE	2.80763E-05	4.55166	98	3059	18	78724	SLC36A1,SLC1A5,SLC7A7,SLC43A2,SLC25A22,SLC38A2,SLC38A10,SLC15A4,SLC22A4,SLC38A6,SLC1A7,SLC6A13,SLC7A5,SLC25A2,SLC7A6,GRIA4,SLC6A5,SLC25A15
GO:MF	tumor necrosis factor receptor superfamily binding	GO:0032813	FALSE	2.83253E-05	4.54783	50	3059	13	78724	TNFSF18,TNFSF12,TRAF6,MYD88,TNFSF14,TMBIM1,BID,TNFSF10,ADAM8,CFLAR,FADD,LTA,TRAF5
GO:MF	oxidoreductase activity, acting on peroxide as acceptor	GO:0016684	FALSE	3.04502E-05	4.51641	59	3059	14	78724	MGST2,MGST1,MGST3,SESN2,PRDX6,PRDX1,PRDX5,IPCEF1,PRDX2,GPX3,MPO,GSTP1,LRRK2,GSTM2
GO:MF	protein phosphatase regulator activity	GO:0019888	FALSE	3.30704E-05	4.48056	99	3059	18	78724	LMTK2,PPP1R15B,STYXL1,PPP4R1,PPP1R7,EIF2AK2,PPP1R10,PPP2R5A,CALM3,SAG,PPP2R3B,LIMK2,CALM2,PPP6R1,PPP1R3B,PPP1R9B,PPP1R17,PPP3R2
GO:MF	molecular carrier activity	GO:0140104	FALSE	3.30704E-05	4.48056	99	3059	18	78724	JDP2,NUP214,XPO5,IPCEF1,MYD88,ATOX1,NUBP1,RAN,XPO7,KPNA4,TNPO3,MTCH1,VPS72,CALR,XPO6,XPO1,XPO4,IPO4
GO:MF	ion channel regulator activity	GO:0099106	FALSE	3.41615E-05	4.46646	157	3059	23	78724	SCLT1,LAMP1,KCNAB2,CACNG8,SLC30A1,VAMP8,KCNE1,RRAD,KCNE3,CACNG4,NOS1,FGF13,FXYD6,CALM2,MICU1,GLRX,LAMP2,VTI1B,KCNIP4,CAV1,PTPN3,ITPR1,DPP10
GO:MF	protein serine/threonine kinase activator activity	GO:0043539	FALSE	3.58262E-05	4.4458	69	3059	15	78724	MAP2K2,CCND3,BMP2,LTF,STK4,STK3,CDK5R1,MAP2K1,CALM3,ATG13,CCNK,CALM2,IQGAP1,CCND1,CCND2
GO:MF	transmembrane receptor protein kinase activity	GO:0019199	FALSE	3.88667E-05	4.41042	100	3059	18	78724	NRG1,EFNA4,CSF1R,PDGFRB,IGF2R,LILRB4,EFNA3,TGFBR1,TEK,IGF1R,ACVRL1,EPHB2,BMPR1B,VEGFA,LTK,EPHA4,RET,AXL
GO:MF	L-amino acid transmembrane transporter activity	GO:0015179	FALSE	4.79212E-05	4.31947	61	3059	14	78724	SLC36A1,SLC1A5,SLC7A7,SLC43A2,SLC25A22,SLC38A2,SLC38A10,SLC15A4,SLC38A6,SLC1A7,SLC7A5,SLC25A2,SLC7A6,SLC25A15
GO:MF	intramembrane lipid transporter activity	GO:0140303	FALSE	5.25354E-05	4.27955	44	3059	12	78724	ATP11A,ATG9A,TMEM30A,PLSCR1,MFSD2A,CLPTM1L,ANO6,VDAC2,XKR8,ATP8B2,ABCB4,TMEM30B
GO:MF	exopeptidase activity	GO:0008238	FALSE	5.334E-05	4.27295	102	3059	18	78724	RNPEPL1,CTSA,SCPEP1,MEP1A,CPXM2,RNPEP,NPEPL1,DPP3,ZMPSTE24,SCRN2,CPM,CTSH,CNDP2,NAALADL1,LAP3,DPP4,PRSS16,AGBL2
GO:MF	amyloid-beta binding	GO:0001540	FALSE	6.50853E-05	4.18652	82	3059	16	78724	APOA1,CLSTN1,TLR2,COL25A1,LRPAP1,ITGB2,SORL1,C1QA,TLR6,ITGAM,CACNA1B,LRP1,EPHB2,PICALM,EPHA4,GRIA4
GO:MF	steroid dehydrogenase activity	GO:0016229	FALSE	6.87899E-05	4.16248	37	3059	11	78724	HSD3B7,DHRS4,HSD17B11,HSD17B4,SRD5A1,NSDHL,HSD17B10,SRD5A3,HSD17B3,HSD17B6,HSD17B2
GO:MF	dioxygenase activity	GO:0051213	FALSE	7.12785E-05	4.14704	93	3059	17	78724	JMJD6,ASPH,ALOXE3,EGLN1,KDM4A,PHF2,TMLHE,P4HB,PLOD3,KDM4B,PLOD2,ASPHD2,ALOX5,PLOD1,KDM6B,ALKBH5,IDO2
GO:MF	oxidoreductase activity, acting on the CH-CH group of donors	GO:0016627	FALSE	7.39856E-05	4.13085	63	3059	14	78724	BLVRB,TBXAS1,LBR,ACADVL,SRD5A1,BLVRA,DPYD,ACAA1,DECR1,ACADS,DHCR7,SRD5A3,ACADM,PTGR1
GO:MF	receptor serine/threonine kinase binding	GO:0033612	FALSE	7.78982E-05	4.10847	30	3059	10	78724	GPR17,BMP2,OPRD1,PYCARD,INHBA,FKBP1A,MDM2,FADD,CDH5,BMP10
GO:MF	cholesterol transfer activity	GO:0120020	FALSE	0.000105145	3.97821	24	3059	9	78724	STAR,APOA1,TSPO,STARD3,GRAMD1A,NPC2,OSBPL2,STARD5,APOA4
GO:MF	MHC class II protein complex binding	GO:0023026	FALSE	0.000105145	3.97821	24	3059	9	78724	ANXA11,HSP90AA1,B2M,CD4,HLA-DOA,MS4A1,HLA-DOB,HLA-DRB5,HLA-DPB1
GO:MF	lipoprotein particle receptor activity	GO:0030228	FALSE	0.000108818	3.9633	18	3059	8	78724	LRP10,APOBR,SORL1,LRP1,CXCL16,VLDLR,OLR1,LRP2
GO:MF	hydrolase activity, acting on carbon-nitrogen (but not peptide) bonds	GO:0016810	FALSE	0.00011	3.95861	130	3059	20	78724	APMAP,CD101,PGLYRP1,NIT1,PADI2,MTHFD2,ASAH1,NADSYN1,PADI4,CDA,NDST1,DPYSL4,DPYSL2,ZBP1,ARG1,LACC1,ADAR,PIGL,ADARB1,MTHFD2L
GO:MF	sterol transfer activity	GO:0120015	FALSE	0.000110968	3.9548	31	3059	10	78724	STAR,APOA1,TSPO,OSBPL1A,STARD3,GRAMD1A,NPC2,OSBPL2,STARD5,APOA4
GO:MF	pyridoxal phosphate binding	GO:0030170	FALSE	0.000121325	3.91605	56	3059	13	78724	PDXK,ALAS1,CISD1,MTARC1,SDSL,CSAD,PYGB,CBS,SGPL1,PYGM,GLDC,SPTLC3,PDXDC1
GO:MF	iron ion binding	GO:0005506	FALSE	0.000131058	3.88254	156	3059	22	78724	JMJD6,TBXAS1,LCN2,ALOXE3,EGLN1,LTF,FBXL5,PHF2,TMLHE,PLOD3,PLOD2,ALOX5,FTL,CYP2C9,PLOD1,PPP1CA,CALR,FA2H,CYP2W1,CYP2D6,CYP3A43,RRM2
GO:MF	heme binding	GO:0020037	FALSE	0.00013858	3.8583	144	3059	21	78724	CYBA,HEBP1,BACH1,JAK2,TBXAS1,STEAP3,STEAP4,EIF2AK1,CBS,MPO,ABCB6,SUOX,CYP2C9,NOS1,SLC48A1,CYB5R4,FA2H,CYP2W1,CYP2D6,CYP3A43,IDO2
GO:MF	myosin binding	GO:0017022	FALSE	0.000138951	3.85714	76	3059	15	78724	LMTK2,TOM1,RAB10,PYCARD,CORO1A,PDLIM2,CXCR4,MOBP,MYL3,GSN,SPATA6,RAB27A,CALD1,MYLK2,AXL
GO:MF	vitamin B6 binding	GO:0070279	FALSE	0.000151572	3.81938	57	3059	13	78724	PDXK,ALAS1,CISD1,MTARC1,SDSL,CSAD,PYGB,CBS,SGPL1,PYGM,GLDC,SPTLC3,PDXDC1
GO:MF	phosphatidylinositol bisphosphate binding	GO:1902936	FALSE	0.00015164	3.81919	109	3059	18	78724	TWF2,CAPG,WIPI1,FLII,SLC9A1,SVIL,KCNJ2,RAB35,TIRAP,GSN,ANXA2,TTPAL,SH3PXD2B,WIPI2,PICALM,SDCBP,OSBPL2,OBSCN
GO:MF	acid-thiol ligase activity	GO:0016878	FALSE	0.000155761	3.80754	32	3059	10	78724	SLC27A2,ACSBG1,ACSL3,ACSS2,SUCLG1,ACSF2,SUCLA2,ACSS3,SLC27A3,SLC27A5
GO:MF	polypeptide conformation or assembly isomerase activity	GO:0120544	FALSE	0.000160131	3.79552	121	3059	19	78724	KIF3C,MYO1F,KIF13A,KIF13B,SPAST,MYO9B,MYO7A,PSMC3,PSMC5,KIF27,MYO7B,KIF1C,MYO5A,PSMC2,DNAH8,DNAI2,MYO1C,KIF5C,KIF2A
GO:MF	carbon-oxygen lyase activity	GO:0016835	FALSE	0.000166371	3.77892	77	3059	15	78724	TBXAS1,HADHB,ALOXE3,PCBD1,HSD17B4,HADHA,ACO1,TPI1,ECHDC3,CBS,CA4,POLB,AUH,POLG,CA12
GO:MF	FAD binding	GO:0071949	FALSE	0.000167019	3.77723	40	3059	11	78724	CYB5R3,QSOX1,NQO2,STEAP3,STEAP4,D2HGDH,LDHD,NDOR1,KDM1B,MICAL3,KMO
GO:MF	myosin phosphatase activity	GO:0017018	FALSE	0.000181126	3.74202	88	3059	16	78724	PTEN,DUSP23,UBLCP1,CTDSP1,DUSP3,PPM1D,DUSP6,PPM1B,SSH1,DUSP1,CTDP1,CTDSP2,PPP1CA,PPP1CB,DUSP13B,DUSP4
GO:MF	growth factor binding	GO:0019838	FALSE	0.000182503	3.73873	134	3059	20	78724	CSF1R,SORT1,PDGFRB,IGF2R,SHC1,KAZALD1,IL1R2,TGFBR1,TEK,FSTL4,IGF1R,ACVRL1,SDCBP,HTRA1,COL5A1,NLRP7,FGFBP3,A2M,LRP2,WFIKKN2
GO:MF	protein-folding chaperone binding	GO:0051087	FALSE	0.000182503	3.73873	134	3059	20	78724	GRN,PGLYRP1,DNAJB12,BAK1,DNAJB6,SCARB2,GRPEL1,FNIP2,BAX,CALR,DNAJA1,TBCA,DNAJA3,BIRC5,FICD,HYOU1,USP13,AARSD1,TERT,LRP2
GO:MF	polyubiquitin modification-dependent protein binding	GO:0031593	FALSE	0.0001884	3.72492	58	3059	13	78724	TOM1,RAD23A,PARP10,MPND,SHARPIN,PSMD4,RNF31,SQSTM1,AGAP3,ZFAND2B,NPLOC4,RAD23B,DZIP3
GO:MF	transcription corepressor binding	GO:0001222	FALSE	0.000191867	3.717	49	3059	12	78724	CTNNB1,BCL6,HDAC5,LCOR,CTBP2,FAM89B,THAP7,SMAD3,ETS1,RORA,ZNF547,EHMT2
GO:MF	acetyltransferase activity	GO:0016407	FALSE	0.000212382	3.67288	100	3059	17	78724	CREBBP,HADHB,NAA60,SAT2,HADHA,SPHK1,ACAA1,LPCAT2,BRPF3,SAT1,ACAA2,TAF10,HGSNAT,GNPNAT1,KAT6B,SRCAP,NCOA3
GO:MF	gamma-tubulin binding	GO:0043015	FALSE	0.000215667	3.66622	33	3059	10	78724	NDRG1,B9D2,NEDD1,LYN,PAK1,TUBGCP5,OFD1,CENPJ,TUBGCP4,BRSK1
GO:MF	phosphatidylinositol 3-kinase binding	GO:0043548	FALSE	0.000234144	3.63052	26	3059	9	78724	JAK2,CORO1A,IRS2,PIK3AP1,GSN,CBL,IGF1R,PTPN13,AXL
GO:MF	phosphatidylserine binding	GO:0001786	FALSE	0.000245862	3.60931	69	3059	14	78724	OSBPL5,SMPD3,ANXA4,ANXA5,CD300LF,ANXA11,CD300A,ANXA2,SCARB2,ANXA3,GAS6,SYT17,PLEKHN1,AXL
GO:MF	kinase inhibitor activity	GO:0019210	FALSE	0.000280427	3.55218	80	3059	15	78724	SH3BP5L,TESC,CDKN2C,YWHAG,YWHAB,GMFG,HSPB1,LILRB4,TRIB1,INKA1,CDKN2D,HTRA2,CAV1,TRIB2,RHOH
GO:MF	2-oxoglutarate-dependent dioxygenase activity	GO:0016706	FALSE	0.000286904	3.54226	60	3059	13	78724	JMJD6,ASPH,EGLN1,KDM4A,PHF2,TMLHE,P4HB,PLOD3,KDM4B,PLOD2,PLOD1,KDM6B,ALKBH5
GO:MF	ligand-modulated transcription factor activity	GO:0098531	FALSE	0.000286904	3.54226	60	3059	13	78724	RXRA,VDR,BACH1,NR6A1,ESRRB,NR1H3,PPARG,ABHD2,ESRRA,THRA,RORA,RORC,NR1D2
GO:MF	ligase activity, forming carbon-sulfur bonds	GO:0016877	FALSE	0.000287854	3.54083	42	3059	11	78724	SLC27A2,ACSBG1,ACSL3,ACSS2,SUCLG1,ACSF2,SUCLA2,ATG7,ACSS3,SLC27A3,SLC27A5
GO:MF	peptide antigen binding	GO:0042605	FALSE	0.000287854	3.54083	42	3059	11	78724	TAP1,HLA-F,HLA-E,HLA-A,B2M,SLC7A5,HLA-DOA,HLA-DOB,HLA-DRB5,CLEC4M,HLA-DPB1
GO:MF	scaffold protein binding	GO:0097110	FALSE	0.000296338	3.52821	70	3059	14	78724	MAP2K2,SYK,CD163,AKAP5,PANX1,PSAP,HSP90AA1,MAP2K1,VIM,LYN,ATG4B,NOS1,KRT18,KRT8
GO:MF	transmembrane receptor protein tyrosine kinase activity	GO:0004714	FALSE	0.000331809	3.47911	81	3059	15	78724	NRG1,EFNA4,CSF1R,PDGFRB,IGF2R,LILRB4,EFNA3,TEK,IGF1R,EPHB2,VEGFA,LTK,EPHA4,RET,AXL
GO:MF	sphingolipid binding	GO:0046625	FALSE	0.000339045	3.46974	27	3059	9	78724	SELL,PSAP,CD300LF,PLA2G4A,LYN,VDAC2,CLIP3,S1PR1,CLN8
GO:MF	hormone binding	GO:0042562	FALSE	0.00034064	3.4677	92	3059	16	78724	C2CD2L,TSPO,SHC1,INHBA,SLC40A1,CMKLR1,ABHD2,ALDH1A1,ADIPOR2,THRA,IGF1R,CTSH,CALR,CRYM,OXTR,LRP2
GO:MF	oxidoreductase activity, acting on the CH-CH group of donors, NAD or NADP as acceptor	GO:0016628	FALSE	0.000398358	3.39973	35	3059	10	78724	BLVRB,TBXAS1,LBR,SRD5A1,BLVRA,DPYD,DECR1,DHCR7,SRD5A3,PTGR1
GO:MF	low-density lipoprotein particle receptor activity	GO:0005041	FALSE	0.000444586	3.35204	15	3059	7	78724	LRP10,SORL1,LRP1,CXCL16,VLDLR,OLR1,LRP2
GO:MF	1-acylglycerol-3-phosphate O-acyltransferase activity	GO:0003841	TRUE	0.00045576	3.34126	21	3059	8	78724	AGPAT2,AGPAT3,MBOAT7,AGPAT1,LPCAT2,MBOAT2,LPCAT3,LPGAT1
GO:MF	gated channel activity	GO:0022836	FALSE	0.000464427	3.33308	326	3059	33	78724	ANO10,CACNA1E,TMEM63B,CLCN4,SLC1A5,P2RX1,KCNAB2,KCNJ15,CACNG8,KCNJ2,SLC1A7,KCNE1,CLCN7,KCNE3,CACNG4,MCOLN2,CACNA1B,ANO6,VDAC2,CLCN3,CLCN5,KCNN3,CNGA1,HTR3A,TMC1,CAV1,GRIA4,CACNA1S,HTR1B,KCNA3,KCNH8,ITPR1,SHROOM2
GO:MF	UDP-galactosyltransferase activity	GO:0035250	FALSE	0.000482338	3.31665	28	3059	9	78724	B4GALT5,B3GALT4,B3GNT8,B3GNT2,PLOD3,B3GNT5,B4GALT3,B3GALT2,LALBA
GO:MF	G protein-coupled receptor activity	GO:0004930	FALSE	0.000496612	3.30398	839	3059	63	78724	AGTRAP,OR1J4,S1PR4,ADORA3,GPR84,HRH2,GPR17,ACKR1,LTB4R,OPRD1,CCRL2,C3AR1,PDGFRB,OR10H2,GPR35,SPHK1,C5AR1,CMKLR1,FZD2,SUCNR1,GPR27,OXER1,PPARG,OR1Q1,CXCR4,NLRP6,CHRM3,INPP5K,GPR160,GPBAR1,CCR2,P2RY2,F2RL1,OR5B12,LPAR2,CCR9,CCR6,GPRC5D,CELSR1,ELOVL4,OPN1MW,GPR171,GPR52,CCR4,OXTR,GPR183,RHO,TACR2,SSTR2,F2RL2,CHRM4,GRM1,S1PR1,RGR,HTR2B,CXCR6,DRD3,UTS2R,OR2AG1,HTR1B,TAS2R60,GPR15,GRM6
GO:MF	SNARE binding	GO:0000149	FALSE	0.000500015	3.30102	106	3059	17	78724	EXOC3,STX10,STXBP2,SNAP29,STXBP3,NAPA,VAMP8,TNFAIP2,PICALM,LRRK2,VTI1B,SYT17,STX17,VPS52,PRRT2,TSNARE1,CPLX1
GO:MF	transferase activity, transferring alkyl or aryl (other than methyl) groups	GO:0016765	FALSE	0.000521409	3.28282	63	3059	13	78724	MGST2,MGST1,MGST3,HMBS,SRM,COQ2,GSTO1,GSTP1,NANS,GSTM1,GSTM4,DPH2,GSTM2
GO:MF	beta-catenin binding	GO:0008013	FALSE	0.000655514	3.18342	108	3059	17	78724	PXN,CTNNBIP1,RUVBL2,PSEN1,SUFU,FOXO3,SETD1A,CDH10,LZIC,KDM6B,RNF220,SMAD3,TCF4,CDH5,CDH22,RORA,SHROOM2
GO:MF	disordered domain specific binding	GO:0097718	FALSE	0.000675172	3.17059	29	3059	9	78724	CTNNB1,RB1,HSP90AA1,GAPDH,AP2M1,HSPA1A,MDM2,NCOA3,TEAD2
GO:MF	lysophospholipid acyltransferase activity	GO:0071617	FALSE	0.000691664	3.16011	22	3059	8	78724	AGPAT2,AGPAT3,MBOAT7,AGPAT1,LPCAT2,MBOAT2,LPCAT3,LPGAT1
GO:MF	lysophosphatidic acid acyltransferase activity	GO:0042171	FALSE	0.000691664	3.16011	22	3059	8	78724	AGPAT2,AGPAT3,MBOAT7,AGPAT1,LPCAT2,MBOAT2,LPCAT3,LPGAT1
GO:MF	sialyltransferase activity	GO:0008373	TRUE	0.000691664	3.16011	22	3059	8	78724	ST3GAL6,ST3GAL2,ST3GAL4,ST3GAL3,ST3GAL5,ST6GALNAC1,ST8SIA1,ST6GALNAC5
GO:MF	protein kinase inhibitor activity	GO:0004860	FALSE	0.000716701	3.14466	75	3059	14	78724	SH3BP5L,TESC,CDKN2C,YWHAG,YWHAB,GMFG,HSPB1,LILRB4,TRIB1,INKA1,CDKN2D,HTRA2,CAV1,TRIB2
GO:MF	lipid transmembrane transporter activity	GO:0170055	FALSE	0.000734895	3.13377	55	3059	12	78724	CEACAM1,SLC2A1,SLC27A2,SLC10A3,MFSD2A,SLC43A3,SLC22A1,SLCO3A1,SLC10A1,SLC27A5,SLC22A8,SLCO4A1
GO:MF	oxysterol binding	GO:0008142	FALSE	0.000763681	3.11709	16	3059	7	78724	OSBPL5,INSIG2,VDAC2,GPR183,CAV1,RORA,RORC
GO:MF	MAP kinase kinase activity	GO:0004708	FALSE	0.000763681	3.11709	16	3059	7	78724	MAP2K2,MAP2K6,MAPK14,MAP2K1,MAPKAPK3,MAP2K3,MAP3K9
GO:MF	phosphatidylinositol-3-phosphate binding	GO:0032266	FALSE	0.000777361	3.10938	46	3059	11	78724	DENND1A,ZFYVE1,WIPI1,SNX27,SAP30L,PLA2G4A,NCF4,SNX12,SH3PXD2B,WIPI2,OBSCN
GO:MF	antigen binding	GO:0003823	FALSE	0.000877291	3.05686	174	3059	22	78724	FCN1,TAP1,HLA-F,HLA-E,HLA-A,TSPAN4,LILRA1,B2M,SLC7A5,EP400,HLA-DOA,IGHV1-69,HLA-DOB,HLA-DRB5,IGLL5,IL7R,IGKV5-2,CD40,IGHA2,SLAMF1,CLEC4M,HLA-DPB1
GO:MF	STAT family protein binding	GO:0097677	FALSE	0.000915728	3.03823	11	3059	6	78724	CEBPA,SPI1,PARP9,DTX3L,PPARG,HSF1
GO:MF	G-protein alpha-subunit binding	GO:0001965	FALSE	0.000931147	3.03098	30	3059	9	78724	IGF2R,RGS19,RGS14,NUCB1,IGF1R,F2RL1,RIC8A,GPSM1,HTR2B
GO:MF	transcription coactivator binding	GO:0001223	FALSE	0.000979202	3.00913	47	3059	11	78724	CREBBP,PPARG,HIF1A,EPAS1,ATF7,SMAD3,MED1,GATA3,RORA,TEAD2,TERT
GO:MF	phosphotransferase activity, for other substituted phosphate groups	GO:0016780	FALSE	0.00102424	2.9896	23	3059	8	78724	SAMD8,CDIPT,PTDSS2,PIGO,PTDSS1,SGMS2,PIGF,FKTN
GO:MF	ligase activity	GO:0016874	FALSE	0.0010647	2.97277	176	3059	22	78724	CARS2,SLC27A2,ACSBG1,ACSL3,ACSS2,TRIM25,SUCLG1,ATP6V0C,ACSF2,NADSYN1,ATP5MF,SUCLA2,IARS2,ATG7,ATP6V1A,ACSS3,MDM2,SLC27A3,WARS2,SLC27A5,AARSD1,GCLM
GO:MF	voltage-gated monoatomic ion channel activity	GO:0005244	FALSE	0.0011715	2.93126	177	3059	22	78724	CACNA1E,CLCN4,KCNAB2,KCNJ15,CACNG8,KCNJ2,KCNE1,CLCN7,KCNE3,CACNG4,CACNA1B,ANO6,VDAC2,CLCN3,CLCN5,KCNN3,TMC1,CAV1,CACNA1S,HTR1B,KCNA3,KCNH8
GO:MF	monocarboxylic acid binding	GO:0033293	FALSE	0.00117342	2.93055	78	3059	14	78724	RXRA,RBP7,VDR,S100A8,S100A9,IGF2R,PSAP,OXER1,PPARG,GSTP1,ID3,CYP2W1,GSTM2,CRABP2
GO:MF	beta-galactoside (CMP) alpha-2,3-sialyltransferase activity	GO:0003836	FALSE	0.00118941	2.92467	7	3059	5	78724	ST3GAL6,ST3GAL2,ST3GAL4,ST3GAL3,ST3GAL5
GO:MF	ubiquitin-like protein conjugating enzyme activity	GO:0061650	FALSE	0.0011967	2.92202	39	3059	10	78724	UBE2S,UBE2E3,ATG3,UBE2H,UBE2A,UFC1,UBE2J2,UBE2L3,CDC34,UBE2R2
GO:MF	ATP-dependent protein folding chaperone	GO:0140662	FALSE	0.00126667	2.89733	31	3059	9	78724	HSPA1L,TOR1A,HSP90AA1,HSPA6,HSPA1A,CCT7,HSPA1B,HYOU1,CCT6B
GO:MF	galactosyltransferase activity	GO:0008378	FALSE	0.00126667	2.89733	31	3059	9	78724	B4GALT5,B3GALT4,B3GNT8,B3GNT2,PLOD3,B3GNT5,B4GALT3,B3GALT2,LALBA
GO:MF	protein folding chaperone	GO:0044183	FALSE	0.00130371	2.88482	68	3059	13	78724	HSPA1L,TOR1A,HSPB1,HSP90AA1,DNAJB6,HSPA6,HSPA1A,CCT7,HSPA1B,CALR,RIC8A,HYOU1,CCT6B
GO:MF	enzyme-substrate adaptor activity	GO:0140767	FALSE	0.00137525	2.86162	79	3059	14	78724	KLHL2,ARRDC1,FBXW11,HERPUD1,FBXO45,NMNAT1,DTX3L,FZR1,TRPC4AP,RBM47,FBXW7,FBXO42,KLHL3,WDR77
GO:MF	mRNA 3'-UTR binding	GO:0003730	FALSE	0.00141921	2.84795	114	3059	17	78724	QKI,EXOSC4,CPEB4,DAZAP1,ZNF385A,CARHSP1,RC3H1,CELF2,HNRNPC,TARDBP,FXR2,RBM47,AUH,ZFP36,FMR1,RNF40,RBM24
GO:MF	C-C chemokine receptor activity	GO:0016493	FALSE	0.00148379	2.82863	24	3059	8	78724	CCRL2,CXCR4,CCR2,CCR9,CCR6,CCR4,CXCR6,GPR15
GO:MF	solute:proton symporter activity	GO:0015295	FALSE	0.00148379	2.82863	24	3059	8	78724	SLC16A3,SLC36A1,SLC15A3,SLC25A22,SLC15A4,SLC25A3,SLC2A9,SLC17A5
GO:MF	disulfide oxidoreductase activity	GO:0015036	FALSE	0.00153992	2.8125	40	3059	10	78724	QSOX1,P4HB,GSR,GSTO1,GFER,TMX4,GLRX,TXNL1,TXNDC5,PDIA4
GO:MF	translation factor activity	GO:0180051	FALSE	0.00155074	2.80946	91	3059	15	78724	GTPBP1,TUFM,EIF4E2,CPEB4,EIF6,EIF1B,ABTB1,EIF2B5,EIF1,MTRF1L,HBS1L,GTPBP2,EIF4G3,EIF3B,EEF1B2
GO:MF	chitinase activity	GO:0004568	FALSE	0.00155854	2.80728	4	3059	4	78724	CTBS,CHIT1,OVGP1,CHIA
GO:MF	Toll-like receptor 4 binding	GO:0035662	FALSE	0.00155854	2.80728	4	3059	4	78724	S100A8,S100A9,LY96,TIRAP
GO:MF	nuclear receptor activity	GO:0004879	FALSE	0.00162369	2.7895	59	3059	12	78724	RXRA,VDR,NR6A1,ESRRB,NR1H3,PPARG,ABHD2,ESRRA,THRA,RORA,RORC,NR1D2
GO:MF	hydro-lyase activity	GO:0016836	FALSE	0.00162369	2.7895	59	3059	12	78724	TBXAS1,HADHB,ALOXE3,PCBD1,HSD17B4,HADHA,ACO1,ECHDC3,CBS,CA4,AUH,CA12
GO:MF	extracellular matrix structural constituent	GO:0005201	FALSE	0.00165342	2.78162	167	3059	21	78724	EMILIN2,LAMB3,COL25A1,TGFBI,COL8A2,CHADL,FGL2,MMRN1,LUM,EFEMP2,COL28A1,POSTN,COL16A1,CD4,COL6A6,COL5A1,SPON1,LAMA3,COL13A1,LAMA5,ENAM
GO:MF	voltage-gated channel activity	GO:0022832	FALSE	0.00170374	2.7686	181	3059	22	78724	CACNA1E,CLCN4,KCNAB2,KCNJ15,CACNG8,KCNJ2,KCNE1,CLCN7,KCNE3,CACNG4,CACNA1B,ANO6,VDAC2,CLCN3,CLCN5,KCNN3,TMC1,CAV1,CACNA1S,HTR1B,KCNA3,KCNH8
GO:MF	MHC class I receptor activity	GO:0032393	TRUE	0.00177079	2.75183	12	3059	6	78724	LILRA5,LILRA6,LILRB4,LILRA1,CTSH,LILRA4
GO:MF	collagen binding	GO:0005518	FALSE	0.00183503	2.73636	70	3059	13	78724	CTSB,CTSS,TGFBI,CHADL,LUM,MMP9,CD44,PPIB,C1QTNF1,PAK1,MRC2,COCH,SMAD3
GO:MF	NADH dehydrogenase (ubiquinone) activity	GO:0008137	FALSE	0.00196563	2.7065	41	3059	10	78724	NDUFB1,NDUFS2,NDUFB4,NDUFA1,NDUFV2,NDUFC1,NDUFC2,NDUFB6,NDUFB3,NDUFS7
GO:MF	endopeptidase activator activity	GO:0061133	FALSE	0.00198347	2.70258	18	3059	7	78724	NLRC4,PSENEN,PSME1,CARD8,PSME2,APH1B,VSIR
GO:MF	glutathione transferase activity	GO:0004364	FALSE	0.00210742	2.67625	25	3059	8	78724	MGST2,MGST1,MGST3,GSTO1,GSTP1,GSTM1,GSTM4,GSTM2
GO:MF	MHC protein complex binding	GO:0023023	FALSE	0.00225852	2.64618	33	3059	9	78724	ANXA11,HSP90AA1,B2M,CD4,HLA-DOA,MS4A1,HLA-DOB,HLA-DRB5,HLA-DPB1
GO:MF	steroid dehydrogenase activity, acting on the CH-OH group of donors, NAD or NADP as acceptor	GO:0033764	FALSE	0.00225852	2.64618	33	3059	9	78724	HSD3B7,DHRS4,HSD17B11,HSD17B4,NSDHL,HSD17B10,HSD17B3,HSD17B6,HSD17B2
GO:MF	structural constituent of muscle	GO:0008307	FALSE	0.00248994	2.60381	42	3059	10	78724	ANKRD2,ASPH,SMTN,MYL3,MYL11,TCAP,CSRP1,MYBPC2,NEB,OBSCN
GO:MF	protein kinase C binding	GO:0005080	FALSE	0.00283988	2.5467	52	3059	11	78724	TWF2,YWHAG,HDAC5,PRKD2,PDLIM5,HSPB1,PICK1,TIRAP,SQSTM1,MARCKS,DACT3
GO:MF	G protein activity	GO:0003925	FALSE	0.00283988	2.5467	52	3059	11	78724	RAB5C,RAB7A,RAC1,RAB10,ARL8B,GBP1,RAN,RAB5A,RAB27A,GNA13,RASL11B
GO:MF	phosphatidylinositol-4,5-bisphosphate binding	GO:0005546	FALSE	0.00292539	2.53382	84	3059	14	78724	TWF2,CAPG,FLII,SLC9A1,SVIL,KCNJ2,RAB35,TIRAP,GSN,ANXA2,PICALM,SDCBP,OSBPL2,OBSCN
GO:MF	fatty acid ligase activity	GO:0015645	FALSE	0.00293998	2.53166	26	3059	8	78724	SLC27A2,ACSBG1,ACSL3,ACSS2,ACSF2,ACSS3,SLC27A3,SLC27A5
GO:MF	fatty acid-CoA ligase activity	GO:0120515	FALSE	0.00293998	2.53166	26	3059	8	78724	SLC27A2,ACSBG1,ACSL3,ACSS2,ACSF2,ACSS3,SLC27A3,SLC27A5
GO:MF	metal cation:proton antiporter activity	GO:0051139	FALSE	0.00293998	2.53166	26	3059	8	78724	SLC9A1,GHITM,SLC9A8,SLC30A1,SLC11A1,SLC9A9,SLC9A7,SLC9B1
GO:MF	inhibitory MHC class I receptor activity	GO:0032396	FALSE	0.00306941	2.51295	8	3059	5	78724	LILRA5,LILRA6,LILRB4,LILRA1,LILRA4
GO:MF	protein serine/threonine/tyrosine kinase activity	GO:0004712	FALSE	0.00313138	2.50426	43	3059	10	78724	MAP2K2,MAP2K6,CLK3,PRKACA,MAPK14,MAP2K1,MAPKAPK3,MAP2K3,DYRK4,MAP3K9
GO:MF	phospholipase A2 activity	GO:0004623	FALSE	0.00313138	2.50426	43	3059	10	78724	PRDX6,PNPLA2,PLA2G15,ABHD3,PLA2G4A,PROCA1,ANXA2,PGAP6,ANXA3,PLA2G7
GO:MF	single-stranded RNA binding	GO:0003727	FALSE	0.00337739	2.47142	85	3059	14	78724	JMJD6,TLR7,TLR8,ATXN1,DAZAP1,CNBP,SNRPC,HNRNPC,U2AF2,LACTB2,PABPN1,FMR1,DHX58,IFIT5
GO:MF	aspartic-type endopeptidase activity	GO:0004190	FALSE	0.00385405	2.41408	35	3059	9	78724	CTSD,ASPRV1,PSEN1,GAPDH,SORL1,HM13,SPPL2A,CASP7,NLRP7
GO:MF	NADH dehydrogenase activity	GO:0003954	FALSE	0.00391118	2.40769	44	3059	10	78724	NDUFB1,NDUFS2,NDUFB4,NDUFA1,NDUFV2,NDUFC1,NDUFC2,NDUFB6,NDUFB3,NDUFS7
GO:MF	transferase activity, transferring sulphur-containing groups	GO:0016782	FALSE	0.00408522	2.38878	75	3059	13	78724	CHST15,MPST,TST,HS6ST1,TPST1,CHST13,TPST2,ACAA1,NDST1,CHST11,GAL3ST1,UST,HS3ST1
GO:MF	cysteine-type endopeptidase activator activity involved in apoptotic process	GO:0008656	FALSE	0.00451132	2.3457	20	3059	7	78724	CASP1,CTSS,PYCARD,CARD8,APAF1,NLRP12,CTSH
GO:MF	neurotransmitter transmembrane transporter activity	GO:0005326	FALSE	0.00451132	2.3457	20	3059	7	78724	SLC22A4,SLC29A1,SLC22A1,SLC6A2,SLC6A16,SLC6A3,SLC18A3
GO:MF	aspartic-type peptidase activity	GO:0070001	FALSE	0.0049613	2.3044	36	3059	9	78724	CTSD,ASPRV1,PSEN1,GAPDH,SORL1,HM13,SPPL2A,CASP7,NLRP7
GO:MF	carbohydrate derivative transmembrane transporter activity	GO:1901505	FALSE	0.00505388	2.29638	55	3059	11	78724	SLC35A2,SLC15A3,PANX1,SLC46A2,SLC19A1,SLC15A4,SLC17A5,MFSD2A,SLC29A1,SLC28A3,SLC22A1
GO:MF	CoA-ligase activity	GO:0016405	FALSE	0.00545622	2.26311	28	3059	8	78724	SLC27A2,ACSBG1,ACSL3,ACSS2,ACSF2,ACSS3,SLC27A3,SLC27A5
GO:MF	mitogen-activated protein kinase binding	GO:0051019	FALSE	0.00545622	2.26311	28	3059	8	78724	MAPKAPK2,NBR1,MAPK14,PPM1D,DUSP1,MAPKAPK3,MAPK7,ATF7
GO:MF	ATPase-coupled monoatomic cation transmembrane transporter activity	GO:0019829	FALSE	0.00606872	2.2169	56	3059	11	78724	ATP6V0E1,ATP6V0A1,ATP6V1E1,ATP6V0D1,ATP6V0C,TCIRG1,ATP6V1A,ATP6V1B2,ATP6V1C1,ATP6V0B,ATP6V1G2
GO:MF	2-acylglycerol-3-phosphate O-acyltransferase activity	GO:0047144	FALSE	0.00668352	2.17499	9	3059	5	78724	MBOAT7,LPCAT2,MBOAT2,LPCAT3,LPGAT1
GO:MF	glycolipid binding	GO:0051861	FALSE	0.00727757	2.13801	29	3059	8	78724	SELL,CLEC4E,PSAP,GPAA1,CLN3,LYN,CLN6,CLIP3
GO:MF	protein tyrosine/serine/threonine phosphatase activity	GO:0008138	FALSE	0.00727757	2.13801	29	3059	8	78724	DUSP23,MTMR3,SBF1,DUSP3,DUSP6,DUSP1,DUSP13B,DUSP4
GO:MF	metal cluster binding	GO:0051540	FALSE	0.00737135	2.13245	79	3059	13	78724	NDUFS2,CISD1,FBXL5,NDUFV2,ACO1,NUBP1,DPYD,RSAD2,GSTP1,METTL17,UQCRFS1,NDUFS7,DPH2
GO:MF	TRAIL binding	GO:0045569	FALSE	0.00755075	2.12201	5	3059	4	78724	TNFRSF10D,TNFSF10,TNFRSF10B,TNFRSF10A
GO:MF	C3HC4-type RING finger domain binding	GO:0055131	FALSE	0.00755075	2.12201	5	3059	4	78724	PINK1,HSPA1A,HSPA1B,DNAJA1
GO:MF	promoter-specific chromatin binding	GO:1990841	FALSE	0.00764293	2.11674	68	3059	12	78724	WDR13,SETDB1,TRIM28,NUP98,HSF1,E2F4,DNMT1,TAF10,GADD45A,SMAD3,MED1,EHMT2
GO:MF	nucleotidyltransferase activity	GO:0016779	FALSE	0.00779085	2.10841	156	3059	19	78724	PARP10,POLR2A,CTU1,NMNAT1,PARP9,CHRAC1,POLE4,POLR2J,CDS2,PAPOLA,POLD4,PAPSS2,POLB,POLG,OAS1,POLR2E,COASY,FICD,TERT
GO:MF	p53 binding	GO:0002039	FALSE	0.0089258	2.04935	69	3059	12	78724	CREBBP,BRD4,PTTG1IP,BRCA1,RFFL,HIF1A,ZNF385A,USP10,MUL1,PRMT5,MDM2,EHMT2
GO:MF	oxidoreductase activity, acting on NAD(P)H, oxygen as acceptor	GO:0050664	FALSE	0.00926789	2.03302	22	3059	7	78724	CYBA,NCF1,NCF2,NCF4,SH3PXD2B,CYB5R4,KMO
GO:MF	glutathione peroxidase activity	GO:0004602	FALSE	0.00926789	2.03302	22	3059	7	78724	MGST2,MGST1,MGST3,PRDX6,GPX3,GSTP1,GSTM2
GO:MF	insulin receptor binding	GO:0005158	FALSE	0.00926789	2.03302	22	3059	7	78724	GRB10,SHC1,IRS2,INSL3,IGF1R,PHIP,IGF1
GO:MF	calcium/calmodulin-dependent protein kinase activity	GO:0004683	FALSE	0.00958536	2.01839	30	3059	8	78724	MAPKAPK2,CAMKK2,PHKG1,MAPKAPK3,PHKA2,CAMK2G,PHKA1,MYLK2
GO:BP	biosynthetic process	GO:0009058	FALSE	5e-324	323.306	10664	3059	1271	78724	CYBA,MAP2K2,NCF1,AGPAT2,NDUFB1,SEMA4D,MAFG,CES1,NLRC4,LAPTM5,NACC2,CHST15,GSK3A,ZNF672,MTF1,B4GALT5,NDUFS2,CCND3,CEBPA,PTEN,ASPRV1,MIER2,F11R,RNASEL,S100A12,ASCL2,ELF4,TFEB,NEK4,ZDHHC12,CYB5R3,LOXL3,MPST,TRIM8,CASP1,UPF1,LILRA5,TYROBP,PSENEN,NFAM1,TNFRSF1B,FLOT2,B3GALT4,MGST2,TICAM1,JDP2,CTNNB1,NRG1,AGPAT3,MVP,RXRA,FKBP4,SERTAD1,WWP2,EXTL3,QSOX1,TESC,MED16,DEAF1,FCN1,OAZ2,RIPK3,SAMD8,AKIRIN2,ADOR…
GO:BP	metabolic process	GO:0008152	FALSE	5e-324	323.306	14136	3059	1862	78724	CYBA,MAP2K2,NCF1,AGPAT2,NDUFB1,SEMA4D,VPS37B,MAFG,CTSD,CES1,NLRC4,CTSB,LAPTM5,HK2,NACC2,CHST15,GSK3A,HK3,ZNF672,MTF1,OPA3,NSFL1C,RNASE2,B4GALT5,NDUFS2,CCND3,CEBPA,LMTK2,PTEN,SLC16A3,RNF208,ASPRV1,MIER2,SBF2,F11R,RNASEL,ANAPC11,S100A12,ASCL2,MARK2,ELF4,TFEB,NEK4,ARAP1,ZDHHC12,CYB5R3,LOXL3,MPST,UBE2S,TRIM8,RRAGD,TST,CASP1,ZFYVE1,UPF1,LILRA5,TYROBP,KLHL8,PSENEN,NFAM1,TNFRSF1B,KLHL2,AATK,FLOT2,B3GALT…
GO:BP	biological_process	GO:0008150	FALSE	5e-324	323.306	21026	3059	2721	78724	ANO10,POMP,CYBA,MAP2K2,NCF1,AGPAT2,ACTR1A,SERF2,LAMTOR2,NDUFB1,RIN3,MIIP,SEMA4D,VPS37B,MAFG,TWF2,CTSD,CES1,AGTRAP,NLRC4,TRPC6,CTSB,RAB5C,CACNA1E,LAPTM5,ARL8A,HK2,RANBP3,NACC2,CHST15,DOK1,COPA,GSK3A,HK3,KLHDC8B,ZNF672,MTF1,OPA3,NSFL1C,RNASE2,B4GALT5,SHISA5,EMILIN2,CD300C,NDUFS2,CCND3,LRRC61,SYNGR1,CEBPA,LMTK2,PTEN,SLC16A3,DENND1A,AP1B1,RNF208,ASPRV1,MIER2,DYNLT1,SBF2,RAB32,ANKS1A,TMEM63B,F11R,RNAS…
GO:BP	primary metabolic process	GO:0044238	FALSE	5e-324	323.306	12342	3059	1639	78724	MAP2K2,NCF1,AGPAT2,NDUFB1,SEMA4D,VPS37B,MAFG,CTSD,CES1,NLRC4,CTSB,LAPTM5,HK2,NACC2,CHST15,GSK3A,HK3,ZNF672,MTF1,OPA3,NSFL1C,RNASE2,B4GALT5,NDUFS2,CCND3,CEBPA,LMTK2,PTEN,RNF208,ASPRV1,MIER2,RNASEL,ANAPC11,S100A12,ASCL2,MARK2,ELF4,TFEB,NEK4,ZDHHC12,CYB5R3,LOXL3,MPST,UBE2S,TRIM8,CASP1,UPF1,LILRA5,KLHL8,PSENEN,TNFRSF1B,KLHL2,AATK,FLOT2,B3GALT4,MAST3,OS9,MGST2,TICAM1,JDP2,HTRA3,CTNNB1,NRG1,RNF111,AGPA…
GO:BP	cell communication	GO:0007154	FALSE	5e-324	323.306	6540	3059	1125	78724	CYBA,MAP2K2,NCF1,AGPAT2,LAMTOR2,RIN3,SEMA4D,CTSD,AGTRAP,NLRC4,CACNA1E,LAPTM5,NACC2,DOK1,COPA,GSK3A,SHISA5,CCND3,SYNGR1,CEBPA,PTEN,DENND1A,DYNLT1,ANKS1A,F11R,S100A12,MARK2,ARAP1,ZDHHC12,PCDH1,LOXL3,SH3BP5L,TRIM8,RRAGD,CASP1,LILRA5,TYROBP,GAB1,SIPA1,DYSF,LILRA6,IFITM1,PSENEN,NFAM1,TNFRSF1B,FLOT2,SH2D3C,OR1J4,RETN,MAST3,OS9,TICAM1,HTRA3,CTNNB1,NRG1,RNF111,MVP,RXRA,FKBP4,WWP2,EXTL3,TOM1,BLVRB,RPH3AL,…
GO:BP	localization	GO:0051179	FALSE	5e-324	323.306	5555	3059	1011	78724	ANO10,CYBA,MAP2K2,NCF1,ACTR1A,LAMTOR2,NDUFB1,RIN3,VPS37B,CTSD,CES1,TRPC6,RAB5C,CACNA1E,LAPTM5,ARL8A,HK2,RANBP3,NACC2,COPA,GSK3A,NSFL1C,NDUFS2,SYNGR1,LMTK2,PTEN,SLC16A3,DENND1A,AP1B1,DYNLT1,RAB32,TMEM63B,F11R,RNASEL,MARK2,TFEB,ZDHHC12,TBC1D10B,TRIM8,RRAGD,TST,UPF1,LILRA5,TYROBP,DYSF,EXOC3,MFSD9,TNFRSF1B,TCN2,CLCN4,FLOT2,RETN,OS9,CTNNB1,NRG1,MGST1,MVP,RXRA,FKBP4,WWP2,TIMM17B,ATP6V0E1,TESC,TOM1,SLC3…
GO:BP	establishment of localization	GO:0051234	FALSE	5e-324	323.306	4928	3059	909	78724	ANO10,CYBA,MAP2K2,NCF1,ACTR1A,NDUFB1,RIN3,VPS37B,CTSD,CES1,TRPC6,RAB5C,CACNA1E,LAPTM5,ARL8A,HK2,RANBP3,COPA,GSK3A,NSFL1C,NDUFS2,SYNGR1,LMTK2,PTEN,SLC16A3,DENND1A,AP1B1,DYNLT1,RAB32,TMEM63B,RNASEL,ZDHHC12,TBC1D10B,TST,UPF1,LILRA5,TYROBP,DYSF,EXOC3,MFSD9,TNFRSF1B,TCN2,CLCN4,FLOT2,RETN,OS9,CTNNB1,NRG1,MGST1,MVP,RXRA,FKBP4,WWP2,TIMM17B,ATP6V0E1,TESC,TOM1,SLC35A2,RPH3AL,FCN1,OAZ2,TSPAN17,AKIRIN2,DIAPH…
GO:BP	response to stress	GO:0006950	FALSE	5e-324	323.306	3948	3059	784	78724	CYBA,MAP2K2,NCF1,AGTRAP,NLRC4,LAPTM5,HK2,NACC2,MTF1,RNASE2,SHISA5,EMILIN2,CD300C,CEBPA,PTEN,F11R,RNASEL,S100A12,ASCL2,ELF4,TFEB,NEK4,ZDHHC12,LOXL3,TRIM8,RRAGD,CASP1,ZFYVE1,UPF1,LILRA5,TYROBP,SIPA1,IFITM1,NFAM1,TNFRSF1B,OS9,MGST2,TICAM1,NRG1,RNF111,MGST1,EXTL3,FCN1,RIPK3,AKIRIN2,ADORA3,BCL6,CDC42EP4,RFC2,WIPI1,HSPA1L,MSRA,FBXO6,VPS26B,NLRP3,APOL2,IL17RA,RAD23A,MAPK1,NDFIP1,GRN,TAP1,MSRB2,GLA,MAP4K…
GO:BP	transport	GO:0006810	TRUE	5e-324	323.306	4407	3059	862	78724	ANO10,CYBA,MAP2K2,ACTR1A,NDUFB1,RIN3,VPS37B,CES1,TRPC6,RAB5C,CACNA1E,LAPTM5,ARL8A,HK2,RANBP3,COPA,GSK3A,NDUFS2,SYNGR1,LMTK2,PTEN,SLC16A3,DENND1A,AP1B1,DYNLT1,RAB32,TMEM63B,RNASEL,TBC1D10B,TST,UPF1,LILRA5,TYROBP,DYSF,EXOC3,MFSD9,TNFRSF1B,TCN2,CLCN4,FLOT2,RETN,OS9,CTNNB1,NRG1,MGST1,MVP,RXRA,FKBP4,WWP2,TIMM17B,ATP6V0E1,TESC,TOM1,SLC35A2,RPH3AL,FCN1,OAZ2,AKIRIN2,DIAPH1,ADORA3,RAB7A,STAR,ARRB1,ARRDC1,…
GO:BP	cellular response to stimulus	GO:0051716	FALSE	5e-324	323.306	7376	3059	1264	78724	CYBA,MAP2K2,NCF1,AGPAT2,LAMTOR2,RIN3,SEMA4D,TWF2,CTSD,CES1,AGTRAP,NLRC4,CTSB,LAPTM5,NACC2,DOK1,COPA,GSK3A,MTF1,SHISA5,NDUFS2,CCND3,CEBPA,PTEN,DENND1A,DYNLT1,RAB32,ANKS1A,F11R,S100A12,MARK2,TFEB,NEK4,ARAP1,ZDHHC12,LOXL3,SH3BP5L,TRIM8,RRAGD,CASP1,ZFYVE1,UPF1,LILRA5,TYROBP,GAB1,SIPA1,LILRA6,IFITM1,PSENEN,NFAM1,TNFRSF1B,FLOT2,SH2D3C,OR1J4,RETN,MAST3,OS9,MGST2,TICAM1,HTRA3,CTNNB1,NRG1,RNF111,MGST1,MVP…
GO:BP	response to stimulus	GO:0050896	FALSE	5e-324	323.306	8999	3059	1515	78724	CYBA,MAP2K2,NCF1,AGPAT2,LAMTOR2,RIN3,SEMA4D,TWF2,CTSD,CES1,AGTRAP,NLRC4,CTSB,LAPTM5,HK2,NACC2,DOK1,COPA,GSK3A,MTF1,RNASE2,SHISA5,EMILIN2,CD300C,NDUFS2,CCND3,SYNGR1,CEBPA,PTEN,DENND1A,DYNLT1,RAB32,ANKS1A,F11R,RNASEL,SELPLG,S100A12,ASCL2,MARK2,ELF4,TFEB,NEK4,ARAP1,ZDHHC12,LOXL3,MPST,SH3BP5L,TRIM8,RRAGD,CASP1,ZFYVE1,UPF1,LILRA5,TYROBP,GAB1,SIPA1,DYSF,LILRA6,IFITM1,PSENEN,NFAM1,TNFRSF1B,FLOT2,SH2D3C,…
GO:BP	regulation of cellular process	GO:0050794	FALSE	5e-324	323.306	11946	3059	1818	78724	CYBA,MAP2K2,NCF1,AGPAT2,LAMTOR2,RIN3,MIIP,SEMA4D,MAFG,TWF2,CTSD,CES1,AGTRAP,NLRC4,TRPC6,CTSB,LAPTM5,HK2,NACC2,DOK1,COPA,GSK3A,ZNF672,MTF1,OPA3,NSFL1C,SHISA5,EMILIN2,CCND3,SYNGR1,CEBPA,PTEN,DENND1A,MIER2,DYNLT1,ANKS1A,F11R,RNASEL,ANAPC11,S100A12,CAPG,ASCL2,MARK2,ELF4,TFEB,NEK4,ARAP1,ZDHHC12,LOXL3,SH3BP5L,UBE2S,TRIM8,RRAGD,CASP1,UPF1,LILRA5,TYROBP,GAB1,WDR13,SIPA1,DYSF,ARPC2,LILRA6,IFITM1,PSENEN,NF…
GO:BP	cellular process	GO:0009987	FALSE	5e-324	323.306	20247	3059	2647	78724	ANO10,POMP,CYBA,MAP2K2,NCF1,AGPAT2,ACTR1A,LAMTOR2,NDUFB1,RIN3,MIIP,SEMA4D,VPS37B,MAFG,TWF2,CTSD,CES1,AGTRAP,NLRC4,TRPC6,CTSB,RAB5C,CACNA1E,LAPTM5,ARL8A,HK2,RANBP3,NACC2,CHST15,DOK1,COPA,GSK3A,HK3,KLHDC8B,ZNF672,MTF1,OPA3,NSFL1C,RNASE2,B4GALT5,SHISA5,EMILIN2,NDUFS2,CCND3,LRRC61,SYNGR1,CEBPA,LMTK2,PTEN,SLC16A3,DENND1A,AP1B1,RNF208,ASPRV1,MIER2,DYNLT1,SBF2,RAB32,ANKS1A,TMEM63B,F11R,RNASEL,SELPLG,ANA…
GO:BP	macromolecule metabolic process	GO:0043170	TRUE	5e-324	323.306	12048	3059	1472	78724	CYBA,MAP2K2,NCF1,AGPAT2,SEMA4D,VPS37B,MAFG,CTSD,NLRC4,CTSB,LAPTM5,NACC2,GSK3A,ZNF672,MTF1,NSFL1C,RNASE2,B4GALT5,CCND3,CEBPA,LMTK2,PTEN,RNF208,ASPRV1,MIER2,F11R,RNASEL,ANAPC11,S100A12,ASCL2,MARK2,ELF4,TFEB,NEK4,ARAP1,ZDHHC12,LOXL3,UBE2S,TRIM8,CASP1,UPF1,LILRA5,TYROBP,KLHL8,PSENEN,NFAM1,TNFRSF1B,KLHL2,AATK,FLOT2,B3GALT4,MAST3,OS9,TICAM1,JDP2,HTRA3,CTNNB1,NRG1,RNF111,MVP,RXRA,FKBP4,SERTAD1,WWP2,EXTL…
GO:BP	developmental process	GO:0032502	FALSE	5e-324	323.306	6553	3059	1090	78724	MAP2K2,AGPAT2,SEMA4D,MAFG,TWF2,CES1,CTSB,HK2,GSK3A,MTF1,B4GALT5,EMILIN2,NDUFS2,CEBPA,PTEN,AP1B1,ASPRV1,DYNLT1,SBF2,RAB32,ANKS1A,F11R,RNASEL,CAPG,ASCL2,MARK2,TFEB,ARAP1,ZDHHC12,PCDH1,LOXL3,MPST,TRIM8,TST,TYROBP,GAB1,SIPA1,DGCR2,IFITM1,NFAM1,TNFRSF1B,AATK,FLOT2,RETN,JDP2,CTNNB1,NRG1,RNF111,RXRA,FKBP4,EXTL3,TESC,BLVRB,DEAF1,RIPK3,AKIRIN2,DIAPH1,BCL6,CDC42EP4,CD63,KIAA0319L,JMJD6,ARHGAP26,NLRP3,FLII,…
GO:BP	multicellular organismal process	GO:0032501	FALSE	5e-324	323.306	7322	3059	1209	78724	CYBA,MAP2K2,NCF1,AGPAT2,SEMA4D,MAFG,TWF2,AGTRAP,NLRC4,CTSB,LAPTM5,HK2,COPA,GSK3A,MTF1,OPA3,B4GALT5,EMILIN2,NDUFS2,CCND3,CEBPA,PTEN,AP1B1,DYNLT1,SBF2,ANKS1A,TMEM63B,F11R,SELPLG,S100A12,CAPG,ASCL2,MARK2,ELF4,TFEB,ZDHHC12,PCDH1,CYB5R3,LOXL3,MPST,TRIM8,CASP1,LILRA5,TYROBP,GAB1,DYSF,DGCR2,IFITM1,NFAM1,TNFRSF1B,AATK,FLOT2,OR1J4,RETN,TICAM1,CTNNB1,NRG1,RNF111,RXRA,FKBP4,EXTL3,TESC,DEAF1,FCN1,RIPK3,AKIRI…
GO:BP	signaling	GO:0023052	FALSE	5e-324	323.306	6515	3059	1122	78724	CYBA,MAP2K2,NCF1,AGPAT2,LAMTOR2,RIN3,SEMA4D,CTSD,AGTRAP,NLRC4,CACNA1E,LAPTM5,NACC2,DOK1,COPA,GSK3A,SHISA5,CCND3,SYNGR1,CEBPA,PTEN,DENND1A,DYNLT1,ANKS1A,F11R,S100A12,MARK2,ARAP1,ZDHHC12,PCDH1,LOXL3,SH3BP5L,TRIM8,RRAGD,CASP1,LILRA5,TYROBP,GAB1,SIPA1,DYSF,LILRA6,IFITM1,PSENEN,NFAM1,TNFRSF1B,FLOT2,SH2D3C,OR1J4,RETN,MAST3,OS9,TICAM1,HTRA3,CTNNB1,NRG1,RNF111,MVP,RXRA,FKBP4,WWP2,EXTL3,TOM1,BLVRB,RPH3AL,…
GO:BP	protein metabolic process	GO:0019538	FALSE	5e-324	323.306	4721	3059	844	78724	MAP2K2,NCF1,SEMA4D,VPS37B,CTSD,NLRC4,CTSB,LAPTM5,GSK3A,NSFL1C,B4GALT5,CCND3,CEBPA,LMTK2,PTEN,RNF208,ASPRV1,RNASEL,ANAPC11,S100A12,MARK2,NEK4,ZDHHC12,LOXL3,UBE2S,TRIM8,CASP1,UPF1,LILRA5,KLHL8,PSENEN,TNFRSF1B,KLHL2,AATK,FLOT2,B3GALT4,MAST3,OS9,TICAM1,HTRA3,CTNNB1,NRG1,RNF111,MVP,FKBP4,SERTAD1,WWP2,EXTL3,QSOX1,TESC,FCN1,OAZ2,RIPK3,TSPAN17,AKIRIN2,RAB7A,ARRB1,ARRDC1,RNF181,HSPA1L,JMJD6,MSRA,GTPBP1,FB…
GO:BP	regulation of metabolic process	GO:0019222	FALSE	5e-324	323.306	7035	3059	1081	78724	CYBA,MAP2K2,NCF1,AGPAT2,SEMA4D,MAFG,CES1,NLRC4,LAPTM5,HK2,NACC2,GSK3A,ZNF672,MTF1,OPA3,CCND3,CEBPA,PTEN,MIER2,F11R,RNASEL,S100A12,ASCL2,MARK2,ELF4,TFEB,NEK4,ARAP1,LOXL3,UBE2S,TRIM8,RRAGD,CASP1,UPF1,LILRA5,TYROBP,PSENEN,NFAM1,TNFRSF1B,FLOT2,TICAM1,JDP2,CTNNB1,NRG1,RNF111,MVP,RXRA,SERTAD1,WWP2,EXTL3,QSOX1,ATP6V0E1,TESC,TOM1,MED16,DEAF1,FCN1,S1PR4,OAZ2,RIPK3,TSPAN17,SAMD8,AKIRIN2,ADORA3,RAB7A,BCL6,S…
GO:BP	positive regulation of biological process	GO:0048518	FALSE	5e-324	323.306	6264	3059	1128	78724	CYBA,MAP2K2,NCF1,AGPAT2,LAMTOR2,SEMA4D,VPS37B,MAFG,TWF2,CTSD,CES1,NLRC4,TRPC6,LAPTM5,HK2,NACC2,DOK1,GSK3A,MTF1,NSFL1C,B4GALT5,SHISA5,EMILIN2,CCND3,CEBPA,PTEN,F11R,RNASEL,ANAPC11,S100A12,ASCL2,MARK2,ELF4,TFEB,NEK4,ARAP1,ZDHHC12,LOXL3,UBE2S,TRIM8,RRAGD,CASP1,UPF1,LILRA5,TYROBP,GAB1,ARPC2,IFITM1,PSENEN,NFAM1,TNFRSF1B,FLOT2,RETN,MGST2,TICAM1,CTNNB1,NRG1,RNF111,RXRA,SERTAD1,WWP2,EXTL3,TESC,TOM1,MED16,…
GO:BP	positive regulation of cellular process	GO:0048522	FALSE	5e-324	323.306	5920	3059	1054	78724	CYBA,MAP2K2,NCF1,AGPAT2,LAMTOR2,SEMA4D,MAFG,TWF2,CTSD,CES1,NLRC4,TRPC6,LAPTM5,NACC2,DOK1,GSK3A,MTF1,NSFL1C,SHISA5,EMILIN2,CCND3,CEBPA,PTEN,F11R,RNASEL,ANAPC11,S100A12,ASCL2,MARK2,ELF4,TFEB,NEK4,ARAP1,ZDHHC12,LOXL3,UBE2S,TRIM8,RRAGD,CASP1,UPF1,LILRA5,TYROBP,GAB1,ARPC2,IFITM1,PSENEN,NFAM1,TNFRSF1B,FLOT2,RETN,TICAM1,CTNNB1,NRG1,RNF111,RXRA,SERTAD1,WWP2,EXTL3,TESC,TOM1,MED16,RPH3AL,DEAF1,FCN1,OAZ2,RI…
GO:BP	regulation of response to stimulus	GO:0048583	FALSE	5e-324	323.306	3993	3059	811	78724	CYBA,MAP2K2,NCF1,AGPAT2,LAMTOR2,RIN3,SEMA4D,CTSD,NLRC4,LAPTM5,NACC2,DOK1,GSK3A,SHISA5,EMILIN2,CEBPA,PTEN,DENND1A,DYNLT1,F11R,S100A12,ASCL2,ELF4,ARAP1,ZDHHC12,LOXL3,TRIM8,RRAGD,CASP1,LILRA5,TYROBP,SIPA1,LILRA6,NFAM1,TNFRSF1B,FLOT2,MGST2,TICAM1,HTRA3,CTNNB1,NRG1,RNF111,MVP,RXRA,WWP2,EXTL3,BLVRB,RPH3AL,FCN1,RIPK3,AKIRIN2,RAB7A,BCL6,ARRB1,ARRDC1,CD63,ARHGAP26,NLRP3,IL17RA,SASH3,LRRC70,FBXW11,MAPK1,HC…
GO:BP	anatomical structure development	GO:0048856	FALSE	5e-324	323.306	5997	3059	1016	78724	MAP2K2,AGPAT2,SEMA4D,MAFG,TWF2,CES1,CTSB,HK2,GSK3A,MTF1,B4GALT5,EMILIN2,NDUFS2,CEBPA,PTEN,AP1B1,ASPRV1,DYNLT1,SBF2,ANKS1A,F11R,CAPG,ASCL2,MARK2,TFEB,ARAP1,ZDHHC12,PCDH1,LOXL3,MPST,TST,TYROBP,GAB1,SIPA1,DGCR2,NFAM1,TNFRSF1B,AATK,FLOT2,RETN,CTNNB1,NRG1,RNF111,RXRA,FKBP4,EXTL3,TESC,BLVRB,DEAF1,RIPK3,AKIRIN2,DIAPH1,BCL6,CDC42EP4,KIAA0319L,JMJD6,ARHGAP26,NLRP3,FLII,LCP1,CD53,SASH3,FBXW11,DPCD,MAPK1,HC…
GO:BP	regulation of biological process	GO:0050789	FALSE	5e-324	323.306	12336	3059	1875	78724	CYBA,MAP2K2,NCF1,AGPAT2,LAMTOR2,RIN3,MIIP,SEMA4D,VPS37B,MAFG,TWF2,CTSD,CES1,AGTRAP,NLRC4,TRPC6,CTSB,CACNA1E,LAPTM5,HK2,NACC2,DOK1,COPA,GSK3A,ZNF672,MTF1,OPA3,NSFL1C,B4GALT5,SHISA5,EMILIN2,CCND3,SYNGR1,CEBPA,PTEN,DENND1A,MIER2,DYNLT1,ANKS1A,F11R,RNASEL,ANAPC11,S100A12,CAPG,ASCL2,MARK2,ELF4,TFEB,NEK4,ARAP1,ZDHHC12,PCDH1,LOXL3,SH3BP5L,UBE2S,TRIM8,RRAGD,CASP1,UPF1,LILRA5,TYROBP,GAB1,WDR13,SIPA1,DYSF,…
GO:BP	signal transduction	GO:0007165	TRUE	5e-324	323.306	6002	3059	1034	78724	CYBA,MAP2K2,NCF1,AGPAT2,LAMTOR2,RIN3,SEMA4D,CTSD,AGTRAP,NLRC4,LAPTM5,NACC2,DOK1,COPA,GSK3A,SHISA5,CCND3,CEBPA,PTEN,DENND1A,DYNLT1,ANKS1A,F11R,S100A12,MARK2,ARAP1,ZDHHC12,LOXL3,SH3BP5L,TRIM8,RRAGD,CASP1,LILRA5,TYROBP,GAB1,SIPA1,LILRA6,IFITM1,PSENEN,NFAM1,TNFRSF1B,FLOT2,SH2D3C,OR1J4,RETN,MAST3,OS9,TICAM1,HTRA3,CTNNB1,NRG1,RNF111,MVP,RXRA,FKBP4,WWP2,EXTL3,TOM1,BLVRB,RPH3AL,FCN1,S1PR4,RIPK3,ADORA3,RA…
GO:BP	regulation of primary metabolic process	GO:0080090	FALSE	5e-324	323.306	5390	3059	885	78724	MAP2K2,NCF1,SEMA4D,MAFG,CES1,NLRC4,LAPTM5,NACC2,GSK3A,ZNF672,MTF1,OPA3,CCND3,CEBPA,PTEN,MIER2,RNASEL,S100A12,ASCL2,MARK2,ELF4,TFEB,NEK4,LOXL3,UBE2S,TRIM8,UPF1,LILRA5,PSENEN,TNFRSF1B,FLOT2,TICAM1,JDP2,CTNNB1,NRG1,RNF111,MVP,RXRA,SERTAD1,WWP2,TESC,MED16,DEAF1,OAZ2,RIPK3,TSPAN17,SAMD8,AKIRIN2,ADORA3,RAB7A,BCL6,STAR,RFC2,ARRB1,TSHZ3,JMJD6,GTPBP1,NLRP3,RAD23A,FBXW11,MAPK1,HCLS1,NDFIP1,GRN,RCOR1,PDK3,S…
GO:BP	biological regulation	GO:0065007	FALSE	5e-324	323.306	12743	3059	1933	78724	CYBA,MAP2K2,NCF1,AGPAT2,SERF2,LAMTOR2,RIN3,MIIP,SEMA4D,VPS37B,MAFG,TWF2,CTSD,CES1,AGTRAP,NLRC4,TRPC6,CTSB,CACNA1E,LAPTM5,HK2,NACC2,DOK1,COPA,GSK3A,ZNF672,MTF1,OPA3,NSFL1C,B4GALT5,SHISA5,EMILIN2,CCND3,SYNGR1,CEBPA,PTEN,DENND1A,MIER2,DYNLT1,ANKS1A,F11R,RNASEL,ANAPC11,S100A12,CAPG,ASCL2,MARK2,ELF4,TFEB,NEK4,ARAP1,ZDHHC12,PCDH1,LOXL3,TBC1D10B,SH3BP5L,UBE2S,TRIM8,RRAGD,CASP1,UPF1,LILRA5,TYROBP,GAB1,WD…
GO:BP	regulation of macromolecule metabolic process	GO:0060255	FALSE	5.614384e-318	317.251	6492	3059	969	78724	CYBA,MAP2K2,NCF1,AGPAT2,SEMA4D,MAFG,NLRC4,LAPTM5,NACC2,GSK3A,ZNF672,MTF1,CCND3,CEBPA,PTEN,MIER2,F11R,RNASEL,S100A12,ASCL2,MARK2,ELF4,TFEB,NEK4,ARAP1,LOXL3,UBE2S,TRIM8,CASP1,UPF1,LILRA5,TYROBP,PSENEN,NFAM1,TNFRSF1B,FLOT2,TICAM1,JDP2,CTNNB1,NRG1,RNF111,MVP,RXRA,SERTAD1,WWP2,EXTL3,TESC,MED16,DEAF1,FCN1,OAZ2,RIPK3,TSPAN17,SAMD8,AKIRIN2,ADORA3,RAB7A,BCL6,RFC2,ARRB1,TSHZ3,JMJD6,GTPBP1,NLRP3,IL17RA,SASH…
GO:BP	cellular component organization or biogenesis	GO:0071840	FALSE	2.2682104e-317	316.644	8393	3059	1103	78724	POMP,CYBA,MAP2K2,LAMTOR2,NDUFB1,RIN3,SEMA4D,VPS37B,TWF2,CTSD,NLRC4,LAPTM5,HK2,NACC2,GSK3A,KLHDC8B,NSFL1C,B4GALT5,NDUFS2,LRRC61,SYNGR1,CEBPA,PTEN,AP1B1,MIER2,DYNLT1,RAB32,F11R,RNASEL,ANAPC11,CAPG,MARK2,TFEB,ARAP1,ZDHHC12,LOXL3,TMEM11,UBE2S,CASP1,ZFYVE1,UPF1,TYROBP,SIPA1,DYSF,EXOC3,ARPC2,TNFRSF1B,CLCN4,MAST3,TICAM1,JDP2,CTNNB1,NRG1,FKBP4,SERTAD1,EXTL3,QSOX1,TOM1,MED16,FCN1,RIPK3,SAMD8,DIAPH1,RAB7A,…
GO:BP	negative regulation of biological process	GO:0048519	FALSE	2.919479e-317	316.535	5834	3059	918	78724	CYBA,RIN3,MIIP,SEMA4D,MAFG,TWF2,CES1,LAPTM5,HK2,NACC2,GSK3A,NSFL1C,EMILIN2,CCND3,CEBPA,PTEN,MIER2,DYNLT1,F11R,RNASEL,CAPG,ASCL2,ELF4,ARAP1,ZDHHC12,LOXL3,TRIM8,RRAGD,UPF1,LILRA5,TYROBP,WDR13,SIPA1,DYSF,IFITM1,TNFRSF1B,FLOT2,RETN,OS9,JDP2,HTRA3,CTNNB1,NRG1,MVP,RXRA,FKBP4,SERTAD1,WWP2,EXTL3,QSOX1,TESC,BLVRB,RPH3AL,DEAF1,OAZ2,AKIRIN2,DIAPH1,ADORA3,RAB7A,BCL6,ARRB1,ARRDC1,TSHZ3,JMJD6,GTPBP1,FBXO6,FLII…
GO:BP	cellular component organization	GO:0016043	FALSE	9.899201012683e-312	311.004	8184	3059	1081	78724	POMP,CYBA,MAP2K2,LAMTOR2,NDUFB1,RIN3,SEMA4D,VPS37B,TWF2,CTSD,NLRC4,LAPTM5,HK2,NACC2,GSK3A,KLHDC8B,NSFL1C,B4GALT5,NDUFS2,LRRC61,SYNGR1,CEBPA,PTEN,AP1B1,MIER2,DYNLT1,RAB32,F11R,ANAPC11,CAPG,MARK2,TFEB,ARAP1,ZDHHC12,LOXL3,TMEM11,UBE2S,CASP1,ZFYVE1,UPF1,TYROBP,SIPA1,DYSF,EXOC3,ARPC2,TNFRSF1B,CLCN4,MAST3,TICAM1,JDP2,CTNNB1,NRG1,FKBP4,SERTAD1,EXTL3,QSOX1,TOM1,MED16,FCN1,RIPK3,DIAPH1,RAB7A,BCL6,CDC42EP4…
GO:BP	negative regulation of cellular process	GO:0048523	FALSE	2.89E-295	294.539	5629	3059	874	78724	CYBA,RIN3,MIIP,SEMA4D,MAFG,TWF2,CES1,LAPTM5,HK2,NACC2,GSK3A,NSFL1C,EMILIN2,CCND3,CEBPA,PTEN,MIER2,DYNLT1,F11R,RNASEL,CAPG,ASCL2,ELF4,ARAP1,ZDHHC12,LOXL3,RRAGD,UPF1,LILRA5,TYROBP,WDR13,SIPA1,DYSF,IFITM1,TNFRSF1B,FLOT2,OS9,JDP2,HTRA3,CTNNB1,NRG1,MVP,RXRA,FKBP4,SERTAD1,WWP2,EXTL3,QSOX1,TESC,BLVRB,RPH3AL,DEAF1,OAZ2,AKIRIN2,DIAPH1,ADORA3,RAB7A,BCL6,ARRB1,ARRDC1,TSHZ3,JMJD6,GTPBP1,FBXO6,FLII,FBXW11,MAP…
GO:BP	multicellular organism development	GO:0007275	FALSE	5.63E-293	292.249	4727	3059	799	78724	MAP2K2,SEMA4D,MAFG,TWF2,HK2,GSK3A,MTF1,B4GALT5,EMILIN2,NDUFS2,CEBPA,PTEN,AP1B1,DYNLT1,SBF2,ANKS1A,F11R,CAPG,ASCL2,MARK2,TFEB,ZDHHC12,PCDH1,LOXL3,MPST,TYROBP,GAB1,NFAM1,TNFRSF1B,AATK,RETN,CTNNB1,NRG1,RNF111,RXRA,FKBP4,EXTL3,TESC,DEAF1,RIPK3,AKIRIN2,BCL6,KIAA0319L,JMJD6,ARHGAP26,NLRP3,SASH3,FBXW11,DPCD,MAPK1,HCLS1,INPP5D,NDFIP1,GRN,RCOR1,CD101,DBN1,GLA,MAP4K4,SCLT1,GFRA3,EFNA4,RAC1,MAP1S,RAB13,GPR1…
GO:BP	regulation of cell communication	GO:0010646	FALSE	4.95E-289	288.305	3486	3059	686	78724	CYBA,MAP2K2,NCF1,AGPAT2,LAMTOR2,SEMA4D,CTSD,LAPTM5,NACC2,DOK1,GSK3A,SHISA5,SYNGR1,PTEN,DENND1A,DYNLT1,F11R,S100A12,ARAP1,ZDHHC12,LOXL3,TRIM8,RRAGD,CASP1,LILRA5,TYROBP,SIPA1,DYSF,NFAM1,FLOT2,RETN,TICAM1,HTRA3,CTNNB1,NRG1,RNF111,MVP,RXRA,WWP2,EXTL3,BLVRB,RPH3AL,RIPK3,ADORA3,RAB7A,BCL6,ARRB1,ARRDC1,CD63,TSHZ3,ARHGAP26,FBXW11,MAPK1,HCLS1,INPP5D,NDFIP1,DBN1,MAP4K4,HOMER3,RAC1,GPR17,SMPDL3A,CTSS,BTBD9,…
GO:BP	regulation of signaling	GO:0023051	FALSE	4.71E-287	286.327	3478	3059	683	78724	CYBA,MAP2K2,NCF1,AGPAT2,LAMTOR2,SEMA4D,CTSD,LAPTM5,NACC2,DOK1,GSK3A,SHISA5,SYNGR1,PTEN,DENND1A,DYNLT1,F11R,S100A12,ARAP1,ZDHHC12,LOXL3,TRIM8,RRAGD,CASP1,LILRA5,TYROBP,SIPA1,DYSF,NFAM1,FLOT2,RETN,TICAM1,HTRA3,CTNNB1,NRG1,RNF111,MVP,RXRA,WWP2,EXTL3,BLVRB,RPH3AL,RIPK3,ADORA3,RAB7A,BCL6,ARRB1,ARRDC1,CD63,TSHZ3,ARHGAP26,FBXW11,MAPK1,HCLS1,INPP5D,NDFIP1,DBN1,MAP4K4,HOMER3,RAC1,GPR17,SMPDL3A,CTSS,BTBD9,…
GO:BP	response to chemical	GO:0042221	FALSE	1.83E-274	273.738	3909	3059	707	78724	NCF1,AGPAT2,LAMTOR2,RIN3,SEMA4D,TWF2,CTSD,CES1,AGTRAP,CTSB,LAPTM5,HK2,DOK1,GSK3A,MTF1,RNASE2,NDUFS2,SYNGR1,CEBPA,SELPLG,S100A12,MPST,RRAGD,CASP1,UPF1,LILRA5,TYROBP,GAB1,SIPA1,LILRA6,IFITM1,TNFRSF1B,OR1J4,RETN,OS9,MGST2,TICAM1,CTNNB1,NRG1,MGST1,RXRA,FKBP4,EXTL3,TESC,BLVRB,RIPK3,AKIRIN2,DIAPH1,CDC42EP4,GNA15,MSRA,FBXO6,VPS26B,NLRP3,IL17RA,LRRC70,MAPK1,HCLS1,HSD3B7,MAP4K4,PDK3,RAC1,RAB13,GPR17,ITPKC…
GO:BP	regulation of biosynthetic process	GO:0009889	FALSE	2.11E-270	269.675	5809	3059	855	78724	CYBA,MAP2K2,NCF1,AGPAT2,SEMA4D,MAFG,CES1,NLRC4,LAPTM5,NACC2,GSK3A,ZNF672,MTF1,CCND3,CEBPA,PTEN,MIER2,F11R,RNASEL,S100A12,ASCL2,ELF4,TFEB,NEK4,LOXL3,TRIM8,CASP1,UPF1,LILRA5,TYROBP,NFAM1,TNFRSF1B,FLOT2,TICAM1,JDP2,CTNNB1,NRG1,RXRA,SERTAD1,WWP2,EXTL3,TESC,MED16,DEAF1,FCN1,RIPK3,SAMD8,AKIRIN2,ADORA3,BCL6,STAR,RFC2,ARRB1,TSHZ3,JMJD6,GTPBP1,NLRP3,IL17RA,SASH3,FBXW11,MAPK1,HCLS1,INPP5D,NDFIP1,RCOR1,GLA,…
GO:BP	cellular localization	GO:0051641	FALSE	2.42E-269	268.616	3661	3059	679	78724	CYBA,MAP2K2,NCF1,LAMTOR2,NDUFB1,VPS37B,CTSD,CES1,RAB5C,LAPTM5,ARL8A,HK2,RANBP3,COPA,GSK3A,NSFL1C,SYNGR1,LMTK2,PTEN,DENND1A,AP1B1,DYNLT1,RAB32,F11R,ZDHHC12,TBC1D10B,TRIM8,RRAGD,UPF1,TYROBP,DYSF,EXOC3,FLOT2,OS9,CTNNB1,NRG1,MVP,WWP2,TIMM17B,TESC,TOM1,RPH3AL,FCN1,OAZ2,TSPAN17,AKIRIN2,DIAPH1,RAB7A,BCL6,STAR,ARRB1,ARRDC1,CD63,WIPI1,HSPA1L,STX10,VPS26B,LCP1,RP2,CD53,FBXW11,DPCD,MAPK1,HCLS1,NDFIP1,DNAJC5…
GO:BP	cell differentiation	GO:0030154	FALSE	1.87E-266	265.729	4437	3059	742	78724	MAP2K2,SEMA4D,MAFG,TWF2,CES1,CTSB,GSK3A,B4GALT5,NDUFS2,CEBPA,PTEN,DYNLT1,RAB32,ANKS1A,F11R,RNASEL,ASCL2,MARK2,LOXL3,TST,TYROBP,SIPA1,IFITM1,NFAM1,TNFRSF1B,FLOT2,RETN,JDP2,CTNNB1,NRG1,RXRA,FKBP4,EXTL3,TESC,BLVRB,DEAF1,RIPK3,AKIRIN2,BCL6,CD63,KIAA0319L,JMJD6,NLRP3,FLII,SLCO4C1,CD53,SASH3,FBXW11,MAPK1,TMEM120A,HCLS1,INPP5D,NDFIP1,GRN,RCOR1,CD101,DBN1,GLA,MAP4K4,SCLT1,SRPK1,GFRA3,EFNA4,RAC1,MAP1S,RAB…
GO:BP	immune system process	GO:0002376	FALSE	2.14E-266	265.67	2871	3059	602	78724	CYBA,MAP2K2,NCF1,RIN3,SEMA4D,CTSD,NLRC4,LAPTM5,RNASE2,CD300C,CCND3,CEBPA,RAB32,F11R,SELPLG,S100A12,ASCL2,ELF4,TFEB,ZDHHC12,LOXL3,TRIM8,CASP1,LILRA5,TYROBP,SIPA1,DYSF,LILRA6,IFITM1,NFAM1,TNFRSF1B,FLOT2,TICAM1,CTNNB1,TESC,FCN1,S1PR4,RIPK3,AKIRIN2,BCL6,CDC42EP4,JMJD6,GTPBP1,VPS26B,NLRP3,LCP1,CEACAM3,IL17RA,SASH3,MAPK1,HCLS1,INPP5D,NDFIP1,HSD3B7,GRN,HRH2,RCOR1,TAP1,CD101,SRPK1,IFI30,RAC1,GPR17,SLC1A5…
GO:BP	cellular developmental process	GO:0048869	FALSE	2.17E-266	265.663	4438	3059	742	78724	MAP2K2,SEMA4D,MAFG,TWF2,CES1,CTSB,GSK3A,B4GALT5,NDUFS2,CEBPA,PTEN,DYNLT1,RAB32,ANKS1A,F11R,RNASEL,ASCL2,MARK2,LOXL3,TST,TYROBP,SIPA1,IFITM1,NFAM1,TNFRSF1B,FLOT2,RETN,JDP2,CTNNB1,NRG1,RXRA,FKBP4,EXTL3,TESC,BLVRB,DEAF1,RIPK3,AKIRIN2,BCL6,CD63,KIAA0319L,JMJD6,NLRP3,FLII,SLCO4C1,CD53,SASH3,FBXW11,MAPK1,TMEM120A,HCLS1,INPP5D,NDFIP1,GRN,RCOR1,CD101,DBN1,GLA,MAP4K4,SCLT1,SRPK1,GFRA3,EFNA4,RAC1,MAP1S,RAB…
GO:BP	regulation of signal transduction	GO:0009966	FALSE	4.44E-263	262.352	3034	3059	614	78724	CYBA,MAP2K2,NCF1,AGPAT2,LAMTOR2,SEMA4D,CTSD,LAPTM5,NACC2,DOK1,GSK3A,SHISA5,PTEN,DENND1A,DYNLT1,F11R,S100A12,ARAP1,ZDHHC12,LOXL3,TRIM8,RRAGD,CASP1,LILRA5,SIPA1,NFAM1,FLOT2,TICAM1,HTRA3,CTNNB1,NRG1,RNF111,MVP,RXRA,WWP2,EXTL3,BLVRB,RPH3AL,RIPK3,RAB7A,BCL6,ARRB1,ARRDC1,CD63,ARHGAP26,FBXW11,MAPK1,HCLS1,INPP5D,NDFIP1,MAP4K4,HOMER3,RAC1,GPR17,SMPDL3A,CTSS,TNFRSF12A,SLC9A1,MAP2K6,VDR,PRKCD,RALGAPA2,SLC15…
GO:BP	regulation of macromolecule biosynthetic process	GO:0010556	FALSE	8.37E-262	261.077	5644	3059	831	78724	CYBA,MAP2K2,NCF1,AGPAT2,SEMA4D,MAFG,NLRC4,LAPTM5,NACC2,GSK3A,ZNF672,MTF1,CCND3,CEBPA,PTEN,MIER2,F11R,RNASEL,S100A12,ASCL2,ELF4,TFEB,NEK4,LOXL3,TRIM8,CASP1,UPF1,LILRA5,TYROBP,NFAM1,TNFRSF1B,FLOT2,TICAM1,JDP2,CTNNB1,NRG1,RXRA,SERTAD1,WWP2,EXTL3,TESC,MED16,DEAF1,FCN1,RIPK3,SAMD8,AKIRIN2,ADORA3,BCL6,RFC2,ARRB1,TSHZ3,JMJD6,GTPBP1,NLRP3,IL17RA,SASH3,FBXW11,MAPK1,HCLS1,INPP5D,NDFIP1,RCOR1,HOMER3,SRPK1,R…
GO:BP	intracellular signal transduction	GO:0035556	FALSE	2.62E-258	257.581	2965	3059	602	78724	MAP2K2,NCF1,LAMTOR2,SEMA4D,LAPTM5,NACC2,DOK1,GSK3A,SHISA5,CEBPA,PTEN,DENND1A,F11R,S100A12,MARK2,ARAP1,ZDHHC12,SH3BP5L,TRIM8,RRAGD,CASP1,LILRA5,TYROBP,SIPA1,NFAM1,TNFRSF1B,FLOT2,SH2D3C,MAST3,OS9,TICAM1,CTNNB1,NRG1,RXRA,FKBP4,WWP2,EXTL3,RIPK3,BCL6,CDC42EP4,ARRB1,GNA15,FBXO6,ARHGAP26,NLRP3,LCP1,FBXW11,MAPK1,HCLS1,INPP5D,NDFIP1,MAP4K4,HOMER3,PDK3,SRPK1,RAC1,GNB1L,RAB13,GPR17,SMPDL3A,SLC9A1,MAP2K6,VDR…
GO:BP	positive regulation of metabolic process	GO:0009893	FALSE	2.35E-257	256.629	3597	3059	659	78724	CYBA,MAP2K2,NCF1,AGPAT2,SEMA4D,MAFG,CES1,NLRC4,LAPTM5,GSK3A,MTF1,CCND3,CEBPA,PTEN,RNASEL,S100A12,ASCL2,MARK2,ELF4,TFEB,NEK4,ARAP1,UBE2S,TRIM8,CASP1,UPF1,LILRA5,TYROBP,PSENEN,NFAM1,TNFRSF1B,TICAM1,CTNNB1,NRG1,RNF111,RXRA,SERTAD1,WWP2,TESC,TOM1,MED16,DEAF1,FCN1,OAZ2,RIPK3,AKIRIN2,RAB7A,STAR,RFC2,ARRB1,WIPI1,JMJD6,GTPBP1,NLRP3,IL17RA,SASH3,RAD23A,FBXW11,MAPK1,HCLS1,NDFIP1,GRN,RAC1,SCAND1,ZNF341,PLAG…
GO:BP	regulation of gene expression	GO:0010468	FALSE	4.66E-253	252.332	5536	3059	811	78724	CYBA,MAP2K2,NCF1,AGPAT2,SEMA4D,MAFG,NLRC4,LAPTM5,NACC2,GSK3A,ZNF672,MTF1,CCND3,CEBPA,PTEN,MIER2,F11R,RNASEL,S100A12,ASCL2,ELF4,TFEB,NEK4,LOXL3,TRIM8,CASP1,UPF1,LILRA5,TYROBP,NFAM1,TNFRSF1B,FLOT2,TICAM1,JDP2,CTNNB1,NRG1,RXRA,SERTAD1,WWP2,EXTL3,TESC,MED16,DEAF1,FCN1,RIPK3,AKIRIN2,ADORA3,BCL6,ARRB1,TSHZ3,JMJD6,GTPBP1,NLRP3,IL17RA,SASH3,FBXW11,MAPK1,HCLS1,INPP5D,NDFIP1,RCOR1,HOMER3,SRPK1,RAC1,ZNF467,…
GO:BP	macromolecule biosynthetic process	GO:0009059	FALSE	5.79E-251	250.238	9643	3059	1086	78724	CYBA,MAP2K2,NCF1,AGPAT2,SEMA4D,MAFG,NLRC4,LAPTM5,NACC2,GSK3A,ZNF672,MTF1,B4GALT5,CCND3,CEBPA,PTEN,ASPRV1,MIER2,F11R,RNASEL,S100A12,ASCL2,ELF4,TFEB,NEK4,ZDHHC12,LOXL3,TRIM8,CASP1,UPF1,LILRA5,TYROBP,PSENEN,NFAM1,TNFRSF1B,FLOT2,B3GALT4,TICAM1,JDP2,CTNNB1,NRG1,MVP,RXRA,FKBP4,SERTAD1,WWP2,EXTL3,QSOX1,TESC,MED16,DEAF1,FCN1,OAZ2,RIPK3,SAMD8,AKIRIN2,ADORA3,BCL6,RFC2,ARRB1,TSHZ3,HSPA1L,JMJD6,GTPBP1,NLRP3,…
GO:BP	catabolic process	GO:0009056	FALSE	5.50E-242	241.26	2639	3059	552	78724	VPS37B,CTSD,CES1,CTSB,LAPTM5,HK2,GSK3A,HK3,NSFL1C,RNASE2,CEBPA,PTEN,SLC16A3,SBF2,RNASEL,ANAPC11,MARK2,TFEB,MPST,UBE2S,TRIM8,RRAGD,TST,ZFYVE1,UPF1,KLHL8,TNFRSF1B,OS9,MGST2,TICAM1,CTNNB1,RNF111,WWP2,QSOX1,ATP6V0E1,TOM1,BLVRB,OAZ2,TSPAN17,AKIRIN2,RAB7A,ARRB1,ARRDC1,WIPI1,GTPBP1,FBXO6,VPS26B,ARHGAP26,IL17RA,RAD23A,FBXW11,NDFIP1,ATP6V0A1,GLA,RAB24,GPD2,MAP1S,NQO2,DCAF11,SLIRP,SMPDL3A,SMG5,DNASE2,CTSS,…
GO:BP	regulation of multicellular organismal process	GO:0051239	FALSE	2.45E-237	236.611	2956	3059	577	78724	CYBA,MAP2K2,NCF1,AGPAT2,SEMA4D,MAFG,TWF2,NLRC4,LAPTM5,HK2,GSK3A,B4GALT5,EMILIN2,CEBPA,PTEN,DYNLT1,F11R,ASCL2,ELF4,LOXL3,CASP1,LILRA5,TYROBP,GAB1,NFAM1,TNFRSF1B,FLOT2,RETN,TICAM1,CTNNB1,NRG1,RXRA,EXTL3,TESC,FCN1,RIPK3,AKIRIN2,ADORA3,BCL6,ARRB1,TSHZ3,NLRP3,IL17RA,SASH3,MAPK1,HCLS1,INPP5D,NDFIP1,GRN,HRH2,RCOR1,CD101,DBN1,GLA,MAP4K4,HOMER3,RAC1,DIP2B,FOSL2,SLC9A1,F12,CAMP,MAP2K6,VDR,SMARCD3,PRKCD,PGL…
GO:BP	system development	GO:0048731	FALSE	8.51E-235	234.07	4053	3059	670	78724	MAP2K2,SEMA4D,TWF2,HK2,GSK3A,MTF1,B4GALT5,EMILIN2,NDUFS2,CEBPA,PTEN,AP1B1,DYNLT1,SBF2,ANKS1A,CAPG,ASCL2,MARK2,ZDHHC12,PCDH1,LOXL3,MPST,TYROBP,GAB1,TNFRSF1B,AATK,RETN,CTNNB1,NRG1,FKBP4,DEAF1,RIPK3,AKIRIN2,BCL6,KIAA0319L,JMJD6,ARHGAP26,FBXW11,DPCD,MAPK1,NDFIP1,GRN,DBN1,GLA,MAP4K4,SCLT1,GFRA3,EFNA4,RAC1,MAP1S,RAB13,GPR17,LRFN1,CDKN2C,KLF5,DIP2B,TNFRSF12A,FOSL2,SLC9A1,CAMP,MAP2K6,ATG9A,VDR,SMARCD3,IT…
GO:BP	response to external stimulus	GO:0009605	FALSE	3.07E-233	232.512	2415	3059	520	78724	CYBA,MAP2K2,NCF1,RIN3,SEMA4D,NLRC4,RNASE2,EMILIN2,CEBPA,PTEN,RAB32,F11R,RNASEL,S100A12,ELF4,TFEB,ZDHHC12,TRIM8,CASP1,UPF1,LILRA5,TYROBP,GAB1,IFITM1,TNFRSF1B,RETN,MGST2,TICAM1,CTNNB1,NRG1,EXTL3,FCN1,RIPK3,AKIRIN2,RAB7A,BCL6,CDC42EP4,CD63,VPS26B,NLRP3,IL17RA,MAPK1,TMEM120A,NDFIP1,HSD3B7,GRN,SRPK1,RAC1,RAB13,GPR17,CD68,SMPDL3A,APOL1,CTSS,FOSL2,SLC9A1,F12,CAMP,MAP2K6,UNC13D,PRKCD,ISG20,SLC15A3,PGLYRP…
GO:BP	positive regulation of macromolecule metabolic process	GO:0010604	FALSE	1.95E-230	229.711	3288	3059	599	78724	CYBA,MAP2K2,NCF1,AGPAT2,SEMA4D,MAFG,NLRC4,LAPTM5,GSK3A,MTF1,CCND3,CEBPA,PTEN,RNASEL,S100A12,ASCL2,MARK2,ELF4,TFEB,NEK4,ARAP1,UBE2S,TRIM8,CASP1,UPF1,LILRA5,TYROBP,PSENEN,NFAM1,TNFRSF1B,TICAM1,CTNNB1,NRG1,RNF111,RXRA,SERTAD1,WWP2,TESC,MED16,DEAF1,FCN1,OAZ2,RIPK3,AKIRIN2,RAB7A,RFC2,ARRB1,JMJD6,GTPBP1,NLRP3,IL17RA,SASH3,RAD23A,FBXW11,MAPK1,HCLS1,NDFIP1,GRN,RAC1,SCAND1,ZNF341,PLAGL1,KLF5,DIP2B,FOSL2,S…
GO:BP	macromolecule localization	GO:0033036	FALSE	1.57E-222	221.804	3228	3059	584	78724	NCF1,LAMTOR2,NDUFB1,VPS37B,CTSD,CES1,RAB5C,LAPTM5,ARL8A,HK2,RANBP3,COPA,GSK3A,NSFL1C,SYNGR1,LMTK2,DENND1A,AP1B1,DYNLT1,RAB32,F11R,ZDHHC12,TRIM8,RRAGD,TST,UPF1,TYROBP,EXOC3,FLOT2,RETN,OS9,CTNNB1,MVP,RXRA,WWP2,TIMM17B,TESC,TOM1,RPH3AL,FCN1,OAZ2,TSPAN17,AKIRIN2,DIAPH1,RAB7A,BCL6,STAR,ARRB1,ARRDC1,CD63,WIPI1,HSPA1L,STX10,VPS26B,APOL2,LCP1,RP2,CD53,HCLS1,NDFIP1,TAP1,DBN1,MAP4K4,HOMER3,RAB24,RAB13,CD68…
GO:BP	cell surface receptor signaling pathway	GO:0007166	FALSE	5.49E-221	220.26	2819	3059	545	78724	CYBA,MAP2K2,AGPAT2,SEMA4D,CTSD,LAPTM5,DOK1,GSK3A,CEBPA,PTEN,ANKS1A,MARK2,LOXL3,CASP1,LILRA5,TYROBP,GAB1,LILRA6,IFITM1,PSENEN,NFAM1,TNFRSF1B,TICAM1,HTRA3,CTNNB1,NRG1,RNF111,MVP,WWP2,BLVRB,FCN1,ADORA3,RAB7A,BCL6,ARRB1,ARRDC1,CD63,JMJD6,IL17RA,FBXW11,MAPK1,HCLS1,INPP5D,REPS2,CD101,HOMER3,GFRA3,EFNA4,RAC1,ASGR2,GPR17,IL13RA1,TNFRSF12A,FOSL2,PRKCD,SHKBP1,BMP2,SEMA4A,APOA1,CSF1R,ACKR1,FRMD8,CEACAM1,VAV…
GO:BP	gene expression	GO:0010467	FALSE	1.38E-218	217.86	9224	3059	1008	78724	CYBA,MAP2K2,NCF1,AGPAT2,SEMA4D,MAFG,NLRC4,LAPTM5,NACC2,GSK3A,ZNF672,MTF1,CCND3,CEBPA,PTEN,ASPRV1,MIER2,F11R,RNASEL,S100A12,ASCL2,ELF4,TFEB,NEK4,LOXL3,TRIM8,CASP1,UPF1,LILRA5,TYROBP,PSENEN,NFAM1,TNFRSF1B,FLOT2,TICAM1,JDP2,CTNNB1,NRG1,MVP,RXRA,FKBP4,SERTAD1,WWP2,EXTL3,QSOX1,TESC,MED16,DEAF1,FCN1,OAZ2,RIPK3,AKIRIN2,ADORA3,BCL6,ARRB1,TSHZ3,HSPA1L,JMJD6,GTPBP1,NLRP3,IL17RA,RP2,SASH3,FBXW11,MAPK1,HCLS1…
GO:BP	positive regulation of response to stimulus	GO:0048584	FALSE	1.76E-217	216.754	2331	3059	494	78724	CYBA,NCF1,AGPAT2,LAMTOR2,SEMA4D,CTSD,NLRC4,LAPTM5,NACC2,DOK1,GSK3A,SHISA5,EMILIN2,CEBPA,PTEN,F11R,S100A12,ZDHHC12,LOXL3,TRIM8,RRAGD,CASP1,LILRA5,TYROBP,NFAM1,FLOT2,MGST2,TICAM1,CTNNB1,NRG1,RNF111,RXRA,EXTL3,FCN1,RIPK3,AKIRIN2,ARRB1,CD63,NLRP3,IL17RA,SASH3,LRRC70,FBXW11,MAPK1,HCLS1,INPP5D,NDFIP1,GRN,MAP4K4,RAC1,GPR17,SMPDL3A,CTSS,TNFRSF12A,FOSL2,SLC9A1,F12,MAP2K6,VDR,SMARCD3,PRKCD,SLC15A3,SECTM1,S…
GO:BP	organelle organization	GO:0006996	FALSE	2.07E-209	208.684	3594	3059	599	78724	MAP2K2,NDUFB1,VPS37B,TWF2,CTSD,LAPTM5,HK2,GSK3A,KLHDC8B,NSFL1C,NDUFS2,LRRC61,CEBPA,PTEN,AP1B1,DYNLT1,RAB32,F11R,ANAPC11,CAPG,MARK2,TFEB,ARAP1,ZDHHC12,TMEM11,UBE2S,ZFYVE1,UPF1,TYROBP,SIPA1,ARPC2,CLCN4,MAST3,CTNNB1,FKBP4,TOM1,DIAPH1,RAB7A,BCL6,CDC42EP4,ARRB1,RNASEK,WIPI1,JMJD6,STX10,ARHGAP26,FLII,PSTPIP2,LCP1,RP2,FBXW11,MAPK1,HCLS1,ATP6V0A1,GRN,MSRB2,DBN1,SCLT1,SRPK1,RAC1,MAP1S,RAB13,SLIRP,SMG5,TFI…
GO:BP	regulation of nucleobase-containing compound metabolic process	GO:0019219	FALSE	1.00E-206	205.998	3990	3059	628	78724	MAP2K2,NCF1,SEMA4D,MAFG,NLRC4,NACC2,GSK3A,ZNF672,MTF1,CCND3,CEBPA,PTEN,MIER2,RNASEL,S100A12,ASCL2,ELF4,TFEB,NEK4,LOXL3,TRIM8,UPF1,TNFRSF1B,JDP2,CTNNB1,NRG1,RXRA,SERTAD1,WWP2,TESC,MED16,DEAF1,RIPK3,AKIRIN2,ADORA3,BCL6,RFC2,ARRB1,TSHZ3,JMJD6,GTPBP1,NLRP3,FBXW11,MAPK1,HCLS1,NDFIP1,RCOR1,PDK3,SRPK1,ZNF467,SCAND1,SLIRP,SMG5,TFIP11,ZNF341,SRSF4,PLAGL1,KLF5,FOSL2,SLC9A1,VDR,SMARCD3,PRKCD,BMP2,TADA2B,TLR…
GO:BP	regulation of biological quality	GO:0065008	FALSE	1.72E-205	204.765	2947	3059	538	78724	CYBA,SERF2,RIN3,SEMA4D,TWF2,AGTRAP,TRPC6,CTSB,LAPTM5,HK2,COPA,GSK3A,B4GALT5,EMILIN2,SYNGR1,PTEN,DYNLT1,F11R,RNASEL,CAPG,MARK2,ARAP1,UPF1,TYROBP,ARPC2,TNFRSF1B,FLOT2,RETN,CTNNB1,NRG1,WWP2,ATP6V0E1,TESC,RPH3AL,S1PR4,DIAPH1,RAB7A,CDC42EP4,RNASEK,GNA15,TSHZ3,VPS26B,FLII,RAD23A,FBXW11,MAPK1,HCLS1,ATP6V0A1,GRN,HRH2,DBN1,GLA,MAP4K4,IFI30,RAC1,ASGR2,LRFN1,DIP2B,FOSL2,SLC9A1,F12,ATP11A,SLC66A2,ATG9A,VDR,P…
GO:BP	defense response	GO:0006952	FALSE	1.62E-198	197.791	1853	3059	424	78724	CYBA,NCF1,NLRC4,LAPTM5,RNASE2,EMILIN2,CD300C,CEBPA,F11R,RNASEL,S100A12,ELF4,TFEB,ZDHHC12,LOXL3,TRIM8,CASP1,LILRA5,TYROBP,IFITM1,NFAM1,TNFRSF1B,MGST2,TICAM1,EXTL3,FCN1,RIPK3,AKIRIN2,ADORA3,BCL6,CDC42EP4,VPS26B,NLRP3,APOL2,IL17RA,NDFIP1,GRN,TAP1,SRPK1,RAC1,GPR17,CD68,SMPDL3A,APOL1,CTSS,FOSL2,F12,CAMP,MAP2K6,UNC13D,PRKCD,ISG20,SLC15A3,PGLYRP1,TMED1,BMP2,APOA1,CSF1R,TLR7,WAS,ACKR1,LAMP1,S100A8,CEACAM…
GO:BP	immune response	GO:0006955	FALSE	3.34E-197	196.476	2070	3059	445	78724	CYBA,NCF1,SEMA4D,NLRC4,LAPTM5,RNASE2,S100A12,ASCL2,TFEB,ZDHHC12,LOXL3,TRIM8,CASP1,LILRA5,TYROBP,SIPA1,DYSF,LILRA6,IFITM1,NFAM1,TNFRSF1B,TICAM1,FCN1,S1PR4,RIPK3,AKIRIN2,BCL6,CDC42EP4,GTPBP1,VPS26B,NLRP3,LCP1,IL17RA,SASH3,MAPK1,INPP5D,NDFIP1,GRN,HRH2,TAP1,SRPK1,GPR17,CD68,SMPDL3A,APOL1,DNASE2,CTSS,FOSL2,F12,CAMP,MAP2K6,UNC13D,PRKCD,ISG20,SLC15A3,PGLYRP1,TMED1,SECTM1,SEMA4A,APOA1,CSF1R,TLR7,WAS,LAMP…
GO:BP	cell development	GO:0048468	FALSE	7.07E-197	196.15	2876	3059	521	78724	MAP2K2,SEMA4D,TWF2,GSK3A,B4GALT5,CEBPA,PTEN,DYNLT1,ANKS1A,F11R,ASCL2,MARK2,LOXL3,TYROBP,SIPA1,NFAM1,TNFRSF1B,CTNNB1,NRG1,FKBP4,TESC,BLVRB,DEAF1,RIPK3,BCL6,JMJD6,NLRP3,FLII,SASH3,FBXW11,MAPK1,HCLS1,INPP5D,NDFIP1,GRN,RCOR1,CD101,DBN1,GLA,MAP4K4,SCLT1,SRPK1,GFRA3,EFNA4,RAC1,MAP1S,RAB13,SLC1A5,SLIRP,DNASE2,KLF5,DIP2B,FOSL2,SMARCD3,PGLYRP1,BMP2,SEMA4A,TOR1A,CSF1R,UQCRQ,NCOA6,S100A8,CEACAM1,GBA2,VAV1,H…
GO:BP	regulation of RNA metabolic process	GO:0051252	FALSE	3.23E-195	194.491	3687	3059	588	78724	MAP2K2,NCF1,SEMA4D,MAFG,NLRC4,NACC2,GSK3A,ZNF672,MTF1,CCND3,CEBPA,PTEN,MIER2,RNASEL,S100A12,ASCL2,ELF4,TFEB,NEK4,LOXL3,TRIM8,UPF1,TNFRSF1B,JDP2,CTNNB1,NRG1,RXRA,SERTAD1,WWP2,TESC,MED16,DEAF1,RIPK3,AKIRIN2,ADORA3,BCL6,ARRB1,TSHZ3,JMJD6,GTPBP1,NLRP3,FBXW11,MAPK1,HCLS1,RCOR1,SRPK1,ZNF467,SCAND1,SLIRP,ZNF341,SRSF4,PLAGL1,KLF5,FOSL2,SLC9A1,VDR,SMARCD3,PRKCD,BMP2,TADA2B,TLR7,WAS,NCOA6,S100A8,ZNF319,SYK…
GO:BP	nucleobase-containing compound metabolic process	GO:0006139	FALSE	8.95E-191	190.048	7992	3059	885	78724	MAP2K2,NCF1,NDUFB1,SEMA4D,MAFG,NLRC4,HK2,NACC2,GSK3A,HK3,ZNF672,MTF1,RNASE2,NDUFS2,CCND3,CEBPA,PTEN,MIER2,RNASEL,S100A12,ASCL2,ELF4,TFEB,NEK4,LOXL3,TRIM8,UPF1,TNFRSF1B,JDP2,CTNNB1,NRG1,RNF111,RXRA,SERTAD1,WWP2,TESC,MED16,DEAF1,RIPK3,TP53I3,AKIRIN2,ADORA3,BCL6,RFC2,ARRB1,RNASEK,PGD,TSHZ3,JMJD6,GTPBP1,FBXO6,NLRP3,RAD23A,FBXW11,MAPK1,HCLS1,NDFIP1,RCOR1,GPD2,PDK3,SRPK1,FAR2,ZNF467,SCAND1,RPIA,SLIRP,S…
GO:BP	positive regulation of biosynthetic process	GO:0009891	FALSE	6.03E-189	188.22	2696	3059	495	78724	CYBA,MAP2K2,NCF1,AGPAT2,MAFG,NLRC4,LAPTM5,GSK3A,MTF1,CEBPA,RNASEL,ASCL2,ELF4,TFEB,NEK4,TRIM8,CASP1,UPF1,LILRA5,TYROBP,NFAM1,TICAM1,CTNNB1,RXRA,SERTAD1,WWP2,TESC,MED16,DEAF1,FCN1,RIPK3,AKIRIN2,STAR,RFC2,ARRB1,JMJD6,NLRP3,IL17RA,SASH3,FBXW11,MAPK1,HCLS1,SCAND1,ZNF341,PLAGL1,KLF5,FOSL2,SLC9A1,F12,VDR,SMARCD3,PRKCD,SECTM1,BMP2,CSF1R,TADA2B,TLR7,WAS,FRMD8,NCOA6,ZNF319,HPSE,TLR8,SYK,RAB3GAP2,RHOG,ERG,M…
GO:BP	vesicle-mediated transport	GO:0016192	FALSE	1.94E-188	187.711	1592	3059	385	78724	CYBA,MAP2K2,ACTR1A,RIN3,VPS37B,CES1,RAB5C,LAPTM5,COPA,SYNGR1,LMTK2,PTEN,DENND1A,AP1B1,RAB32,TMEM63B,TBC1D10B,TYROBP,DYSF,EXOC3,CTNNB1,NRG1,TOM1,RPH3AL,FCN1,RAB7A,ARRB1,RNASEK,CD63,WIPI1,JMJD6,STX10,VPS26B,RP2,MAPK1,DNAJC5,ATP6V0A1,REPS2,RAC1,ASGR2,RAB13,BTBD9,SLC66A2,UNC13D,PLIN3,PRKCD,TRAPPC3,TMED1,TEX261,APOA1,CLSTN1,TOR1A,ARHGAP1,WAS,LAMP1,CEACAM1,TBC1D14,VAV1,SYK,STXBP2,RHOG,LIPA,MAPKAPK2,ITS…
GO:BP	establishment of localization in cell	GO:0051649	FALSE	2.19E-188	187.66	2010	3059	429	78724	CYBA,MAP2K2,VPS37B,CES1,RAB5C,LAPTM5,ARL8A,RANBP3,COPA,NSFL1C,LMTK2,PTEN,DENND1A,AP1B1,DYNLT1,RAB32,TBC1D10B,UPF1,DYSF,EXOC3,FLOT2,OS9,CTNNB1,NRG1,TIMM17B,TOM1,RPH3AL,OAZ2,AKIRIN2,RAB7A,STAR,CD63,WIPI1,STX10,VPS26B,LCP1,FBXW11,DPCD,MAPK1,HCLS1,NDFIP1,DNAJC5,ATP6V0A1,GRN,REPS2,TAP1,MAP4K4,RAB24,MAP1S,RAB13,SMG5,BTBD9,SLC66A2,UNC13D,PRKCD,TRAPPC3,NUP214,TMED1,TEX261,TOR1A,ARHGAP1,WAS,C2CD2L,LAMP1,C…
GO:BP	protein modification process	GO:0036211	FALSE	8.31E-188	187.08	2846	3059	507	78724	MAP2K2,NCF1,SEMA4D,LAPTM5,GSK3A,B4GALT5,CCND3,LMTK2,PTEN,RNF208,RNASEL,ANAPC11,S100A12,MARK2,NEK4,ZDHHC12,LOXL3,UBE2S,TRIM8,LILRA5,KLHL8,KLHL2,AATK,B3GALT4,MAST3,OS9,TICAM1,CTNNB1,NRG1,RNF111,MVP,SERTAD1,WWP2,EXTL3,RIPK3,ARRB1,ARRDC1,RNF181,JMJD6,MSRA,FBXO6,FBXW11,MAPK1,HCLS1,NDFIP1,MAP4K4,PDK3,SRPK1,RAC1,PHRF1,DCAF11,B3GNT8,CDKN2C,DIP2B,MAP2K6,DUSP23,MANBA,PRKCD,MAP3K6,UBE2E3,BMP2,APOA1,TOR1A,CS…
GO:BP	regulation of immune system process	GO:0002682	FALSE	1.08E-187	186.968	1581	3059	383	78724	CYBA,NCF1,RIN3,NLRC4,LAPTM5,CEBPA,ASCL2,ZDHHC12,LOXL3,CASP1,LILRA5,TYROBP,LILRA6,NFAM1,TNFRSF1B,FLOT2,TICAM1,CTNNB1,TESC,FCN1,RIPK3,AKIRIN2,BCL6,NLRP3,CEACAM3,SASH3,MAPK1,HCLS1,INPP5D,NDFIP1,GRN,RCOR1,CD101,RAC1,GPR17,CD68,SMPDL3A,DNASE2,CTSS,FOSL2,MAP2K6,UNC13D,SMARCD3,PRKCD,SLC15A3,PGLYRP1,SECTM1,APOA1,CSF1R,TLR7,WAS,LAMP1,CR1L,S100A8,CEACAM1,YWHAG,VAV1,TLR8,SYK,STXBP2,LIPA,MAPKAPK2,CEACAM4,FCE…
GO:BP	phosphorus metabolic process	GO:0006793	FALSE	1.33E-187	186.876	2410	3059	467	78724	MAP2K2,NCF1,AGPAT2,NDUFB1,SEMA4D,HK2,GSK3A,HK3,NDUFS2,CCND3,LMTK2,PTEN,RNASEL,S100A12,MARK2,NEK4,LILRA5,AATK,MAST3,NRG1,AGPAT3,MVP,SERTAD1,RIPK3,TP53I3,SAMD8,ARRB1,PGD,GTPBP1,PDXK,FBXW11,MAPK1,HCLS1,INPP5D,MAP4K4,GPD2,PDK3,SRPK1,RAC1,FAR2,RPIA,ITPKC,SMPDL3A,SMG5,CDKN2C,MAP2K6,DUSP23,PRKCD,MAP3K6,NDUFB4,ITPK1,BMP2,APOA1,CSF1R,TLR7,PFKFB4,AKR1A1,CEACAM1,YWHAG,TLR8,GRK6,PTPRE,SYK,OPRD1,TKT,GRB10,ERG…
GO:BP	regulation of cellular component organization	GO:0051128	FALSE	1.80E-187	186.744	2433	3059	469	78724	CYBA,MAP2K2,LAMTOR2,RIN3,SEMA4D,TWF2,GSK3A,PTEN,F11R,ANAPC11,CAPG,MARK2,ARAP1,ZDHHC12,UPF1,TYROBP,SIPA1,DYSF,ARPC2,TNFRSF1B,TICAM1,CTNNB1,NRG1,FKBP4,SERTAD1,EXTL3,TOM1,FCN1,DIAPH1,RAB7A,BCL6,CDC42EP4,ARRB1,CD63,WIPI1,JMJD6,FLII,LCP1,CD53,MAPK1,HCLS1,GRN,DBN1,GLA,MAP4K4,RAC1,MAP1S,SMG5,TFIP11,LRFN1,CDKN2C,KLF5,BTBD9,DIP2B,SLC9A1,SMARCD3,PRKCD,BMP2,SEMA4A,APOA1,CLSTN1,TOR1A,CSF1R,WAS,S100A8,CEACAM1…
GO:BP	phosphate-containing compound metabolic process	GO:0006796	FALSE	5.29E-187	186.277	2407	3059	466	78724	MAP2K2,NCF1,AGPAT2,NDUFB1,SEMA4D,HK2,GSK3A,HK3,NDUFS2,CCND3,LMTK2,PTEN,RNASEL,S100A12,MARK2,NEK4,LILRA5,AATK,MAST3,NRG1,AGPAT3,MVP,SERTAD1,RIPK3,TP53I3,SAMD8,ARRB1,PGD,GTPBP1,PDXK,FBXW11,MAPK1,HCLS1,INPP5D,MAP4K4,GPD2,PDK3,SRPK1,RAC1,FAR2,RPIA,ITPKC,SMPDL3A,SMG5,CDKN2C,MAP2K6,DUSP23,PRKCD,MAP3K6,NDUFB4,ITPK1,BMP2,APOA1,CSF1R,TLR7,PFKFB4,AKR1A1,CEACAM1,YWHAG,TLR8,GRK6,PTPRE,SYK,OPRD1,TKT,GRB10,ERG…
GO:BP	positive regulation of macromolecule biosynthetic process	GO:0010557	FALSE	3.55E-185	184.45	2593	3059	481	78724	CYBA,MAP2K2,NCF1,AGPAT2,MAFG,NLRC4,LAPTM5,GSK3A,MTF1,CEBPA,RNASEL,ASCL2,ELF4,TFEB,NEK4,TRIM8,CASP1,UPF1,LILRA5,TYROBP,NFAM1,TICAM1,CTNNB1,RXRA,SERTAD1,WWP2,TESC,MED16,DEAF1,FCN1,RIPK3,AKIRIN2,RFC2,ARRB1,JMJD6,NLRP3,IL17RA,SASH3,FBXW11,HCLS1,SCAND1,ZNF341,PLAGL1,KLF5,FOSL2,SLC9A1,F12,VDR,SMARCD3,SECTM1,BMP2,CSF1R,TADA2B,TLR7,WAS,FRMD8,NCOA6,ZNF319,HPSE,TLR8,SYK,RHOG,ERG,MAPKAPK2,ARID3B,BANP,FCER1G…
GO:BP	regulation of intracellular signal transduction	GO:1902531	FALSE	7.19E-183	182.143	1953	3059	417	78724	MAP2K2,NCF1,LAMTOR2,SEMA4D,LAPTM5,NACC2,DOK1,GSK3A,SHISA5,PTEN,DENND1A,F11R,S100A12,ARAP1,ZDHHC12,TRIM8,RRAGD,CASP1,LILRA5,SIPA1,FLOT2,TICAM1,CTNNB1,NRG1,RXRA,EXTL3,RIPK3,BCL6,ARRB1,ARHGAP26,FBXW11,MAPK1,HCLS1,NDFIP1,MAP4K4,HOMER3,RAC1,GPR17,SMPDL3A,SLC9A1,MAP2K6,VDR,PRKCD,RALGAPA2,SLC15A3,SECTM1,BMP2,APOA1,CSF1R,ARHGAP1,TLR7,S100A8,CEACAM1,YWHAG,VAV1,HPSE,TLR8,SYK,KIAA0319,HERPUD1,ITSN1,GRB2,SES…
GO:BP	DNA-templated transcription	GO:0006351	FALSE	4.69E-182	181.328	3549	3059	559	78724	MAP2K2,NCF1,SEMA4D,MAFG,NLRC4,NACC2,GSK3A,ZNF672,MTF1,CCND3,CEBPA,PTEN,MIER2,RNASEL,S100A12,ASCL2,ELF4,TFEB,NEK4,LOXL3,TRIM8,JDP2,CTNNB1,NRG1,RXRA,SERTAD1,WWP2,TESC,MED16,DEAF1,RIPK3,AKIRIN2,ADORA3,BCL6,ARRB1,TSHZ3,JMJD6,NLRP3,FBXW11,MAPK1,HCLS1,RCOR1,ZNF467,SCAND1,ZNF341,PLAGL1,KLF5,FOSL2,SLC9A1,VDR,SMARCD3,BMP2,TADA2B,TLR7,WAS,NCOA6,S100A8,ZNF319,SYK,RFX1,OPRD1,RHOG,ERG,ARID3B,BANP,PARP10,HDAC5…
GO:BP	biological process involved in interspecies interaction between organisms	GO:0044419	FALSE	4.85E-181	180.314	1759	3059	395	78724	CYBA,NCF1,VPS37B,NLRC4,CTSB,RNASE2,EMILIN2,DYNLT1,F11R,RNASEL,SELPLG,S100A12,TFEB,ZDHHC12,TRIM8,CASP1,ZFYVE1,UPF1,LILRA5,TYROBP,IFITM1,TNFRSF1B,MGST2,TICAM1,WWP2,FCN1,RIPK3,AKIRIN2,RAB7A,CDC42EP4,RNASEK,VPS26B,NLRP3,IL17RA,MAPK1,GRN,SRPK1,SLC1A5,CD68,SMPDL3A,APOL1,CTSS,FOSL2,F12,CAMP,MAP2K6,UNC13D,PRKCD,ISG20,SLC15A3,PGLYRP1,TMED1,BMP2,CSF1R,TLR7,WAS,LAMP1,S100A8,CEACAM1,VAV1,TLR8,SYK,MAPKAPK2,HP…
GO:BP	macromolecule modification	GO:0043412	FALSE	9.41E-181	180.026	3030	3059	514	78724	MAP2K2,NCF1,SEMA4D,LAPTM5,GSK3A,B4GALT5,CCND3,LMTK2,PTEN,RNF208,RNASEL,ANAPC11,S100A12,MARK2,NEK4,ZDHHC12,LOXL3,UBE2S,TRIM8,LILRA5,KLHL8,KLHL2,AATK,B3GALT4,MAST3,OS9,TICAM1,CTNNB1,NRG1,RNF111,MVP,SERTAD1,WWP2,EXTL3,RIPK3,ARRB1,ARRDC1,RNF181,JMJD6,MSRA,FBXO6,FBXW11,MAPK1,HCLS1,NDFIP1,MAP4K4,PDK3,SRPK1,RAC1,PHRF1,DCAF11,B3GNT8,CDKN2C,DIP2B,MAP2K6,DUSP23,MANBA,PRKCD,MAP3K6,UBE2E3,BMP2,APOA1,TOR1A,CS…
GO:BP	cellular macromolecule localization	GO:0070727	FALSE	2.08E-180	179.683	2782	3059	492	78724	NCF1,LAMTOR2,NDUFB1,VPS37B,CTSD,RAB5C,LAPTM5,ARL8A,HK2,RANBP3,COPA,GSK3A,NSFL1C,SYNGR1,LMTK2,DENND1A,AP1B1,DYNLT1,RAB32,F11R,ZDHHC12,TRIM8,RRAGD,TYROBP,EXOC3,FLOT2,OS9,CTNNB1,MVP,WWP2,TIMM17B,TESC,TOM1,RPH3AL,FCN1,OAZ2,TSPAN17,AKIRIN2,DIAPH1,RAB7A,BCL6,ARRB1,ARRDC1,CD63,WIPI1,HSPA1L,STX10,VPS26B,LCP1,RP2,CD53,HCLS1,NDFIP1,TAP1,DBN1,MAP4K4,HOMER3,RAB24,RAB13,CD68,KLF5,ATG9A,PRKCD,CETN2,SLC15A3,NUP…
GO:BP	intracellular signaling cassette	GO:0141124	FALSE	2.37E-180	179.625	1912	3059	410	78724	MAP2K2,NCF1,LAMTOR2,SEMA4D,LAPTM5,DOK1,SHISA5,CEBPA,PTEN,DENND1A,F11R,S100A12,ARAP1,TRIM8,CASP1,LILRA5,SIPA1,NFAM1,FLOT2,SH2D3C,TICAM1,CTNNB1,NRG1,EXTL3,RIPK3,BCL6,CDC42EP4,ARRB1,GNA15,ARHGAP26,FBXW11,MAPK1,HCLS1,NDFIP1,MAP4K4,HOMER3,RAC1,GPR17,SLC9A1,MAP2K6,PRKCD,MAP3K6,RALGAPA2,SECTM1,BMP2,APOA1,CSF1R,ARHGAP1,TLR7,WAS,CEACAM1,VAV1,HPSE,TLR8,SYK,KIAA0319,RHOG,GRB10,LIPA,MAPKAPK2,ITSN1,CCRL2,MAFB…
GO:BP	regulation of DNA-templated transcription	GO:0006355	FALSE	3.67E-180	179.436	3409	3059	545	78724	MAP2K2,NCF1,SEMA4D,MAFG,NLRC4,NACC2,GSK3A,ZNF672,MTF1,CCND3,CEBPA,PTEN,MIER2,RNASEL,S100A12,ASCL2,ELF4,TFEB,NEK4,LOXL3,TRIM8,JDP2,CTNNB1,NRG1,RXRA,SERTAD1,WWP2,TESC,MED16,DEAF1,RIPK3,AKIRIN2,ADORA3,BCL6,ARRB1,TSHZ3,JMJD6,NLRP3,FBXW11,MAPK1,HCLS1,RCOR1,ZNF467,SCAND1,ZNF341,PLAGL1,KLF5,FOSL2,SLC9A1,VDR,SMARCD3,BMP2,TADA2B,TLR7,WAS,NCOA6,S100A8,ZNF319,SYK,RFX1,OPRD1,RHOG,ERG,ARID3B,BANP,PARP10,HDAC5…
GO:BP	programmed cell death	GO:0012501	FALSE	7.11E-180	179.148	1987	3059	417	78724	SEMA4D,CTSD,NLRC4,CTSB,LAPTM5,HK2,NACC2,GSK3A,SHISA5,EMILIN2,PTEN,CASP1,TNFRSF1B,HS1BP3,TICAM1,CTNNB1,NRG1,WWP2,RIPK3,BCL6,MAPK1,HCLS1,INPP5D,RELT,DNAJC5,GRN,MAP4K4,MAP1S,DNASE2,CTSS,PLAGL1,TNFRSF12A,FOSL2,SLC9A1,MAP2K6,DRAM1,ATG9A,VDR,PRKCD,ITPK1,BMP2,TEX261,CSF1R,AKR1A1,LAMP1,S100A8,SYK,HERPUD1,RNF144B,LIPA,ATF5,RBCK1,PRKD2,SMNDC1,TNFSF18,ATG3,PYCARD,TSPO,SORT1,JAK2,SRPK2,GHITM,GNAI2,BTK,IL1B,G…
GO:BP	regulation of RNA biosynthetic process	GO:2001141	FALSE	9.52E-180	179.022	3428	3059	546	78724	MAP2K2,NCF1,SEMA4D,MAFG,NLRC4,NACC2,GSK3A,ZNF672,MTF1,CCND3,CEBPA,PTEN,MIER2,RNASEL,S100A12,ASCL2,ELF4,TFEB,NEK4,LOXL3,TRIM8,JDP2,CTNNB1,NRG1,RXRA,SERTAD1,WWP2,TESC,MED16,DEAF1,RIPK3,AKIRIN2,ADORA3,BCL6,ARRB1,TSHZ3,JMJD6,NLRP3,FBXW11,MAPK1,HCLS1,RCOR1,ZNF467,SCAND1,ZNF341,PLAGL1,KLF5,FOSL2,SLC9A1,VDR,SMARCD3,BMP2,TADA2B,TLR7,WAS,NCOA6,S100A8,ZNF319,SYK,RFX1,OPRD1,RHOG,ERG,ARID3B,BANP,PARP10,HDAC5…
GO:BP	cell death	GO:0008219	FALSE	1.59E-179	178.8	1991	3059	417	78724	SEMA4D,CTSD,NLRC4,CTSB,LAPTM5,HK2,NACC2,GSK3A,SHISA5,EMILIN2,PTEN,CASP1,TNFRSF1B,HS1BP3,TICAM1,CTNNB1,NRG1,WWP2,RIPK3,BCL6,MAPK1,HCLS1,INPP5D,RELT,DNAJC5,GRN,MAP4K4,MAP1S,DNASE2,CTSS,PLAGL1,TNFRSF12A,FOSL2,SLC9A1,MAP2K6,DRAM1,ATG9A,VDR,PRKCD,ITPK1,BMP2,TEX261,CSF1R,AKR1A1,LAMP1,S100A8,SYK,HERPUD1,RNF144B,LIPA,ATF5,RBCK1,PRKD2,SMNDC1,TNFSF18,ATG3,PYCARD,TSPO,SORT1,JAK2,SRPK2,GHITM,GNAI2,BTK,IL1B,G…
GO:BP	cellular response to chemical stimulus	GO:0070887	FALSE	5.83E-179	178.234	2192	3059	436	78724	NCF1,LAMTOR2,RIN3,TWF2,CTSD,CES1,AGTRAP,CTSB,GSK3A,MTF1,NDUFS2,CEBPA,S100A12,RRAGD,CASP1,UPF1,TYROBP,GAB1,SIPA1,TNFRSF1B,MGST2,TICAM1,CTNNB1,MGST1,RXRA,FKBP4,TESC,BLVRB,RIPK3,DIAPH1,GNA15,MSRA,NLRP3,IL17RA,MAPK1,HSD3B7,MAP4K4,PDK3,RAC1,RAB13,ITPKC,CD68,CTSS,SLC9A1,CAMP,MAP2K6,VDR,PRKCD,MGST3,CSF1R,AKR1A1,C2CD2L,S100A8,CEACAM1,YWHAG,VAV1,PTPRE,SYK,OPRD1,RHOG,GRB10,HP,CCRL2,FCER1G,HDAC5,POLR2A,GRB2…
GO:BP	protein localization	GO:0008104	FALSE	7.04E-179	178.153	2770	3059	489	78724	NCF1,LAMTOR2,NDUFB1,VPS37B,CTSD,RAB5C,LAPTM5,ARL8A,HK2,RANBP3,COPA,GSK3A,NSFL1C,SYNGR1,LMTK2,DENND1A,AP1B1,DYNLT1,RAB32,F11R,ZDHHC12,TRIM8,RRAGD,TYROBP,EXOC3,FLOT2,OS9,CTNNB1,MVP,WWP2,TIMM17B,TESC,TOM1,RPH3AL,FCN1,OAZ2,TSPAN17,AKIRIN2,DIAPH1,RAB7A,BCL6,ARRB1,ARRDC1,CD63,WIPI1,HSPA1L,STX10,VPS26B,LCP1,RP2,CD53,HCLS1,NDFIP1,TAP1,DBN1,MAP4K4,HOMER3,RAB24,RAB13,CD68,KLF5,ATG9A,PRKCD,CETN2,SLC15A3,NUP…
GO:BP	anatomical structure morphogenesis	GO:0009653	FALSE	4.70E-171	170.328	2713	3059	474	78724	MAP2K2,SEMA4D,TWF2,HK2,GSK3A,B4GALT5,EMILIN2,PTEN,F11R,MARK2,ARAP1,TYROBP,GAB1,SIPA1,DGCR2,TNFRSF1B,CTNNB1,NRG1,DEAF1,DIAPH1,BCL6,CDC42EP4,JMJD6,FLII,CD53,FBXW11,MAPK1,RELT,GRN,DBN1,GLA,MAP4K4,GFRA3,EFNA4,RAC1,MAP1S,LAMB3,KLF5,DIP2B,TNFRSF12A,FOSL2,CAMP,UNC13D,ATG9A,VDR,SMARCD3,BMP2,SEMA4A,APOA1,TOR1A,CSF1R,CEACAM1,HPSE,SYK,KIAA0319,RHOG,LIPA,LYPLA2,HDAC5,MAFB,GRB2,AGFG1,IST1,CD151,PRKD2,ASPH,FLI…
GO:BP	apoptotic process	GO:0006915	FALSE	1.22E-170	169.915	1923	3059	400	78724	SEMA4D,CTSD,NLRC4,CTSB,HK2,NACC2,GSK3A,SHISA5,EMILIN2,PTEN,CASP1,TNFRSF1B,HS1BP3,TICAM1,CTNNB1,NRG1,WWP2,RIPK3,BCL6,MAPK1,HCLS1,INPP5D,RELT,DNAJC5,GRN,MAP4K4,MAP1S,DNASE2,CTSS,PLAGL1,TNFRSF12A,FOSL2,SLC9A1,MAP2K6,DRAM1,VDR,PRKCD,BMP2,TEX261,CSF1R,AKR1A1,S100A8,HERPUD1,RNF144B,LIPA,ATF5,RBCK1,PRKD2,SMNDC1,TNFSF18,ATG3,PYCARD,TSPO,SORT1,JAK2,SRPK2,GHITM,GNAI2,BTK,IL1B,GBE1,MEF2A,SPI1,LGALS1,LCN2,IF…
GO:BP	regulation of developmental process	GO:0050793	FALSE	2.41E-165	164.617	2457	3059	444	78724	MAP2K2,SEMA4D,MAFG,TWF2,HK2,GSK3A,B4GALT5,EMILIN2,CEBPA,PTEN,DYNLT1,F11R,ASCL2,MARK2,ARAP1,LOXL3,TYROBP,GAB1,IFITM1,NFAM1,TNFRSF1B,FLOT2,RETN,JDP2,CTNNB1,NRG1,RXRA,EXTL3,TESC,AKIRIN2,DIAPH1,BCL6,CDC42EP4,NLRP3,CD53,SASH3,MAPK1,HCLS1,INPP5D,NDFIP1,GRN,RCOR1,CD101,DBN1,GLA,MAP4K4,RAC1,KLF5,DIP2B,FOSL2,ATP11A,CAMP,VDR,SMARCD3,PGLYRP1,BMP2,SEMA4A,CLSTN1,CSF1R,CEACAM1,YWHAG,HPSE,SYK,KIAA0319,RHOG,HDAC…
GO:BP	animal organ development	GO:0048513	FALSE	5.88E-163	162.23	3085	3059	495	78724	MAP2K2,SEMA4D,CTSB,HK2,GSK3A,CEBPA,PTEN,AP1B1,ASPRV1,ASCL2,TFEB,LOXL3,MPST,TYROBP,DGCR2,TNFRSF1B,AATK,RETN,CTNNB1,NRG1,RXRA,FKBP4,EXTL3,DEAF1,RIPK3,AKIRIN2,JMJD6,LCP1,FBXW11,DPCD,MAPK1,RELT,ASGR2,MAP1S,RAB13,LAMB3,TFIP11,KLF5,FOSL2,SLC9A1,MAP2K6,ATG9A,VDR,SMARCD3,BMP2,SEMA4A,APOA1,CSF1R,UQCRQ,NCOA6,CEACAM1,HPSE,SYK,LIPA,MAPKAPK2,ATF5,MAFB,GRB2,ANKRD2,HMG20B,FLI1,EPN1,FGR,TSPO,PCSK5,ATXN1L,NUMBL,S…
GO:BP	regulation of localization	GO:0032879	FALSE	1.11E-162	161.956	2029	3059	401	78724	CYBA,MAP2K2,RIN3,CTSD,CES1,TRPC6,HK2,GSK3A,NSFL1C,PTEN,RNASEL,TRIM8,LILRA5,TYROBP,DYSF,TNFRSF1B,RETN,OS9,CTNNB1,NRG1,RXRA,WWP2,TESC,RPH3AL,FCN1,OAZ2,DIAPH1,ADORA3,RAB7A,ARRB1,CD63,HSPA1L,STX10,VPS26B,LCP1,MAPK1,HCLS1,CRACR2B,NDFIP1,DNAJC5,DBN1,MAP4K4,HOMER3,RAC1,CTSS,BTBD9,SLC9A1,MAP2K6,UNC13D,PLIN3,PRKCD,NUP214,BMP2,APOA1,TOR1A,ARHGAP1,C2CD2L,LAMP1,S100A8,CEACAM1,YWHAG,SYK,STXBP2,OPRD1,RHOG,GRB1…
GO:BP	response to biotic stimulus	GO:0009607	FALSE	3.59E-162	161.445	1634	3059	361	78724	CYBA,NCF1,NLRC4,LAPTM5,RNASE2,EMILIN2,RNASEL,S100A12,TFEB,ZDHHC12,TRIM8,CASP1,UPF1,LILRA5,TYROBP,IFITM1,TNFRSF1B,MGST2,TICAM1,FCN1,RIPK3,AKIRIN2,RAB7A,CDC42EP4,VPS26B,NLRP3,IL17RA,MAPK1,GRN,SRPK1,CD68,SMPDL3A,APOL1,CTSS,FOSL2,F12,CAMP,MAP2K6,UNC13D,PRKCD,ISG20,SLC15A3,PGLYRP1,TMED1,BMP2,CSF1R,TLR7,WAS,LAMP1,S100A8,CEACAM1,YWHAG,VAV1,TLR8,SYK,MAPKAPK2,HP,FCER1G,GBP6,HDAC5,GRB2,ECSIT,RBCK1,CFP,IL10…
GO:BP	response to external biotic stimulus	GO:0043207	FALSE	1.93E-160	159.715	1595	3059	355	78724	CYBA,NCF1,NLRC4,RNASE2,EMILIN2,RNASEL,S100A12,TFEB,ZDHHC12,TRIM8,CASP1,UPF1,LILRA5,TYROBP,IFITM1,TNFRSF1B,MGST2,TICAM1,FCN1,RIPK3,AKIRIN2,RAB7A,CDC42EP4,VPS26B,NLRP3,IL17RA,MAPK1,GRN,SRPK1,CD68,SMPDL3A,APOL1,CTSS,FOSL2,F12,CAMP,MAP2K6,UNC13D,PRKCD,ISG20,SLC15A3,PGLYRP1,TMED1,BMP2,CSF1R,TLR7,WAS,LAMP1,S100A8,CEACAM1,VAV1,TLR8,SYK,MAPKAPK2,HP,FCER1G,GBP6,HDAC5,GRB2,ECSIT,RBCK1,CFP,IL10RB,TOLLIP,PYC…
GO:BP	response to other organism	GO:0051707	FALSE	7.95E-160	159.1	1592	3059	354	78724	CYBA,NCF1,NLRC4,RNASE2,EMILIN2,RNASEL,S100A12,TFEB,ZDHHC12,TRIM8,CASP1,UPF1,LILRA5,TYROBP,IFITM1,TNFRSF1B,MGST2,TICAM1,FCN1,RIPK3,AKIRIN2,RAB7A,CDC42EP4,VPS26B,NLRP3,IL17RA,MAPK1,GRN,SRPK1,CD68,SMPDL3A,APOL1,CTSS,FOSL2,F12,CAMP,MAP2K6,UNC13D,PRKCD,ISG20,SLC15A3,PGLYRP1,TMED1,BMP2,CSF1R,TLR7,WAS,LAMP1,S100A8,CEACAM1,VAV1,TLR8,SYK,MAPKAPK2,HP,FCER1G,GBP6,HDAC5,GRB2,ECSIT,RBCK1,CFP,IL10RB,TOLLIP,PYC…
GO:BP	positive regulation of signaling	GO:0023056	FALSE	1.14E-155	154.942	1796	3059	370	78724	CYBA,NCF1,AGPAT2,LAMTOR2,SEMA4D,CTSD,LAPTM5,NACC2,DOK1,GSK3A,SHISA5,PTEN,F11R,S100A12,ARAP1,ZDHHC12,LOXL3,TRIM8,RRAGD,CASP1,LILRA5,TYROBP,NFAM1,FLOT2,RETN,TICAM1,CTNNB1,NRG1,RNF111,RXRA,EXTL3,RPH3AL,RIPK3,ARRB1,CD63,TSHZ3,FBXW11,MAPK1,HCLS1,NDFIP1,MAP4K4,RAC1,GPR17,CTSS,TNFRSF12A,SLC9A1,MAP2K6,VDR,PRKCD,SLC15A3,SECTM1,SHKBP1,BMP2,APOA1,CLSTN1,CSF1R,TLR7,C2CD2L,S100A8,HPSE,TLR8,SYK,KIAA0319,GRB10,…
GO:BP	positive regulation of cell communication	GO:0010647	FALSE	4.81E-154	153.317	1795	3059	368	78724	CYBA,NCF1,AGPAT2,LAMTOR2,SEMA4D,CTSD,LAPTM5,NACC2,DOK1,GSK3A,SHISA5,PTEN,F11R,S100A12,ZDHHC12,LOXL3,TRIM8,RRAGD,CASP1,LILRA5,TYROBP,NFAM1,FLOT2,RETN,TICAM1,CTNNB1,NRG1,RNF111,RXRA,EXTL3,RPH3AL,RIPK3,ARRB1,CD63,TSHZ3,FBXW11,MAPK1,HCLS1,NDFIP1,MAP4K4,RAC1,GPR17,CTSS,TNFRSF12A,SLC9A1,MAP2K6,VDR,PRKCD,SLC15A3,SECTM1,SHKBP1,BMP2,APOA1,CLSTN1,CSF1R,TLR7,C2CD2L,S100A8,HPSE,TLR8,SYK,KIAA0319,GRB10,LIPA,S…
GO:BP	regulation of response to stress	GO:0080134	FALSE	2.50E-153	152.602	1387	3059	325	78724	CYBA,MAP2K2,NCF1,NLRC4,NACC2,EMILIN2,CEBPA,PTEN,S100A12,ELF4,ZDHHC12,CASP1,LILRA5,TYROBP,TNFRSF1B,MGST2,TICAM1,EXTL3,FCN1,AKIRIN2,BCL6,NLRP3,IL17RA,MAPK1,NDFIP1,GRN,MAP4K4,GPR17,SMPDL3A,TFIP11,CTSS,TNFRSF12A,F12,MAP2K6,SMARCD3,PRKCD,SLC15A3,PGLYRP1,APOA1,TADA2B,TLR7,WAS,LAMP1,S100A8,CEACAM1,VAV1,HPSE,TLR8,SYK,KIAA0319,HERPUD1,MAPKAPK2,UBASH3B,ECSIT,SESN2,MCTP1,PYCARD,FGR,CREBBP,JAK2,TLR5,EFHD1,BT…
GO:BP	positive regulation of multicellular organismal process	GO:0051240	FALSE	1.54E-149	148.814	1667	3059	350	78724	CYBA,MAP2K2,AGPAT2,SEMA4D,TWF2,NLRC4,LAPTM5,HK2,GSK3A,B4GALT5,EMILIN2,CEBPA,CASP1,LILRA5,TYROBP,GAB1,NFAM1,TNFRSF1B,FLOT2,RETN,TICAM1,CTNNB1,NRG1,RXRA,TESC,FCN1,AKIRIN2,BCL6,NLRP3,IL17RA,SASH3,HCLS1,INPP5D,GRN,HRH2,CD101,DBN1,SLC9A1,F12,CAMP,VDR,SMARCD3,SECTM1,BMP2,SEMA4A,CLSTN1,CSF1R,TLR7,FRMD8,YWHAG,VAV1,HPSE,TLR8,SYK,GRB10,MAPKAPK2,FCER1G,IST1,PRKD2,PYCARD,FGR,TSPO,NUMBL,ORM2,JAK2,OSCAR,TBXAS1…
GO:BP	nitrogen compound transport	GO:0071705	FALSE	7.57E-148	147.121	1923	3059	373	78724	VPS37B,RAB5C,LAPTM5,ARL8A,RANBP3,COPA,LMTK2,DENND1A,AP1B1,DYNLT1,RAB32,TST,UPF1,EXOC3,TCN2,OS9,MGST1,MVP,WWP2,TIMM17B,TESC,TOM1,SLC35A2,RPH3AL,OAZ2,AKIRIN2,ADORA3,RAB7A,ARRB1,ARRDC1,CD63,STX10,VPS26B,LCP1,RP2,HCLS1,SLC36A1,NDFIP1,TAP1,MAP4K4,RAB24,RAB13,SLC1A5,SMG5,ATP11A,PRKCD,CETN2,SLC15A3,NUP214,TMED1,CLSTN1,TOR1A,ARHGAP1,C2CD2L,S100A8,HPSE,SYK,RAB3GAP2,STXBP2,HERPUD1,ITSN1,AP2S1,VPS37C,AGFG1,…
GO:BP	nucleic acid metabolic process	GO:0090304	FALSE	2.70E-147	146.568	7434	3059	774	78724	MAP2K2,NCF1,SEMA4D,MAFG,NLRC4,NACC2,GSK3A,ZNF672,MTF1,RNASE2,CCND3,CEBPA,PTEN,MIER2,RNASEL,S100A12,ASCL2,ELF4,TFEB,NEK4,LOXL3,TRIM8,UPF1,TNFRSF1B,JDP2,CTNNB1,NRG1,RNF111,RXRA,SERTAD1,WWP2,TESC,MED16,DEAF1,RIPK3,AKIRIN2,ADORA3,BCL6,RFC2,ARRB1,RNASEK,TSHZ3,JMJD6,GTPBP1,FBXO6,NLRP3,RAD23A,FBXW11,MAPK1,HCLS1,NDFIP1,RCOR1,SRPK1,ZNF467,SCAND1,SLIRP,SMG5,TFIP11,DNASE2,ZNF341,SRSF4,PLAGL1,KLF5,FOSL2,SLC9…
GO:BP	nervous system development	GO:0007399	FALSE	3.38E-146	145.471	2604	3059	432	78724	MAP2K2,SEMA4D,TWF2,GSK3A,MTF1,B4GALT5,NDUFS2,PTEN,DYNLT1,SBF2,ANKS1A,CAPG,ASCL2,MARK2,ZDHHC12,PCDH1,LOXL3,MPST,TYROBP,TNFRSF1B,AATK,CTNNB1,NRG1,FKBP4,DEAF1,AKIRIN2,BCL6,KIAA0319L,ARHGAP26,FBXW11,DPCD,MAPK1,GRN,DBN1,GLA,MAP4K4,SCLT1,GFRA3,EFNA4,RAC1,MAP1S,RAB13,GPR17,LRFN1,CDKN2C,DIP2B,SMARCD3,ITPK1,BMP2,SEMA4A,CLSTN1,TOR1A,CSF1R,UQCRQ,NCOA6,S100A8,YWHAG,GBA2,KIAA0319,RHOG,LYPLA2,HDAC5,ATF5,MAFB,G…
GO:BP	regulation of response to external stimulus	GO:0032101	FALSE	3.11E-145	144.507	1082	3059	282	78724	CYBA,MAP2K2,NCF1,RIN3,NLRC4,EMILIN2,CEBPA,PTEN,S100A12,ELF4,ZDHHC12,CASP1,LILRA5,TYROBP,TNFRSF1B,MGST2,TICAM1,EXTL3,FCN1,AKIRIN2,BCL6,NLRP3,IL17RA,MAPK1,NDFIP1,GRN,RAC1,GPR17,SMPDL3A,CTSS,F12,MAP2K6,PRKCD,SLC15A3,PGLYRP1,APOA1,CSF1R,TLR7,LAMP1,S100A8,CEACAM1,VAV1,HPSE,TLR8,SYK,KIAA0319,MAPKAPK2,UBASH3B,ECSIT,PRKD2,PYCARD,FGR,CREBBP,MOSPD2,JAK2,C3AR1,TLR5,BTK,IL1B,MMP8,SPI1,LGALS1,PDGFRB,PVR,CLEC4…
GO:BP	regulation of protein metabolic process	GO:0051246	FALSE	5.98E-145	144.223	1855	3059	363	78724	MAP2K2,NCF1,SEMA4D,NLRC4,LAPTM5,GSK3A,CCND3,CEBPA,PTEN,S100A12,MARK2,UBE2S,UPF1,LILRA5,PSENEN,TNFRSF1B,FLOT2,TICAM1,CTNNB1,NRG1,RNF111,MVP,SERTAD1,OAZ2,RIPK3,TSPAN17,RAB7A,ARRB1,RAD23A,FBXW11,MAPK1,HCLS1,NDFIP1,GRN,RAC1,CDKN2C,DIP2B,F12,PRKCD,BMP2,APOA1,CSF1R,TIMP2,TLR7,CEACAM1,YWHAG,TLR8,SYK,RAB3GAP2,OPRD1,AURKAIP1,HERPUD1,BANP,PARP10,SESN2,IST1,HMG20B,ASPH,TM9SF2,TNFSF18,TOLLIP,PYCARD,FGR,TSPO,…
GO:BP	response to oxygen-containing compound	GO:1901700	FALSE	1.14E-141	140.944	1669	3059	341	78724	NCF1,TWF2,CTSD,CES1,AGTRAP,GSK3A,RRAGD,CASP1,UPF1,TYROBP,GAB1,SIPA1,TNFRSF1B,RETN,MGST2,TICAM1,CTNNB1,MGST1,RXRA,EXTL3,TESC,BLVRB,RIPK3,AKIRIN2,GNA15,NLRP3,MAPK1,MAP4K4,PDK3,RAB13,CD68,SRSF4,FOSL2,SLC9A1,CAMP,MAP2K6,VDR,PRKCD,TLR7,AKR1A1,C2CD2L,S100A8,CEACAM1,YWHAG,PTPRE,SYK,OPRD1,GRB10,LIPA,MAPKAPK2,HP,HDAC5,GRB2,KLF16,SESN2,ASPH,RAB10,PYCARD,TSPO,SORT1,PXN,SLC2A1,ALAS1,JAK2,TBXAS1,HADHB,TLR5,MA…
GO:BP	positive regulation of immune system process	GO:0002684	FALSE	2.33E-141	140.633	1099	3059	280	78724	CYBA,NLRC4,LAPTM5,CEBPA,ASCL2,ZDHHC12,CASP1,TYROBP,NFAM1,FLOT2,TICAM1,TESC,FCN1,AKIRIN2,BCL6,NLRP3,SASH3,MAPK1,HCLS1,INPP5D,CD101,RAC1,SMPDL3A,CTSS,FOSL2,MAP2K6,SMARCD3,PRKCD,SLC15A3,SECTM1,CSF1R,TLR7,LAMP1,CR1L,S100A8,CEACAM1,YWHAG,VAV1,TLR8,SYK,LIPA,MAPKAPK2,FCER1G,GRB2,ECSIT,RBCK1,PRKD2,TNFSF18,CFP,PYCARD,FGR,CREBBP,MOSPD2,JAK2,C3AR1,TLR5,BTK,IL1B,MMP8,CTNNBIP1,PANX1,SPI1,LGALS1,PVR,CLEC4E,APP…
GO:BP	homeostatic process	GO:0042592	FALSE	3.41E-141	140.468	1736	3059	347	78724	CYBA,NCF1,CES1,TRPC6,HK2,HK3,MTF1,CEBPA,TMEM63B,F11R,UBE2S,CTNNB1,ATP6V0E1,RPH3AL,RIPK3,DIAPH1,RAB7A,BCL6,RNASEK,JMJD6,SASH3,MAPK1,HCLS1,INPP5D,NDFIP1,ATP6V0A1,GRN,RCOR1,MAP4K4,PDK3,ASGR2,SLC1A5,DNASE2,SLC34A3,BTBD9,FOSL2,SLC9A1,MAP2K6,VDR,APOA1,CSF1R,C2CD2L,LAMP1,SYK,HERPUD1,GRB10,LIPA,MAFB,UBASH3B,SESN2,ASPH,TSPO,SLC2A1,ALAS1,CREBBP,JAK2,OSCAR,CCL23,TBXAS1,GHITM,BTK,ATP6AP1,IL1B,CHMP4B,ATP6V1E1…
GO:BP	positive regulation of signal transduction	GO:0009967	FALSE	7.02E-141	140.154	1578	3059	331	78724	CYBA,NCF1,AGPAT2,LAMTOR2,SEMA4D,CTSD,LAPTM5,NACC2,DOK1,GSK3A,SHISA5,PTEN,F11R,S100A12,LOXL3,TRIM8,RRAGD,CASP1,LILRA5,NFAM1,FLOT2,TICAM1,CTNNB1,NRG1,RNF111,RXRA,EXTL3,RIPK3,ARRB1,CD63,FBXW11,HCLS1,NDFIP1,MAP4K4,RAC1,GPR17,CTSS,TNFRSF12A,SLC9A1,MAP2K6,VDR,PRKCD,SLC15A3,SECTM1,SHKBP1,BMP2,APOA1,CSF1R,TLR7,S100A8,HPSE,TLR8,SYK,KIAA0319,GRB10,LIPA,SESN2,RBCK1,PRKD2,RASGEF1A,ZC3H3,IL10RB,PYCARD,FGR,CRE…
GO:BP	nucleobase-containing compound biosynthetic process	GO:0034654	FALSE	3.33E-139	138.477	7076	3059	737	78724	MAP2K2,NCF1,NDUFB1,SEMA4D,MAFG,NLRC4,NACC2,GSK3A,ZNF672,MTF1,NDUFS2,CCND3,CEBPA,PTEN,MIER2,RNASEL,S100A12,ASCL2,ELF4,TFEB,NEK4,LOXL3,TRIM8,UPF1,JDP2,CTNNB1,NRG1,RXRA,SERTAD1,WWP2,TESC,MED16,DEAF1,RIPK3,AKIRIN2,ADORA3,BCL6,RFC2,ARRB1,TSHZ3,JMJD6,NLRP3,FBXW11,MAPK1,HCLS1,RCOR1,PDK3,SRPK1,ZNF467,SCAND1,SLIRP,SMG5,TFIP11,ZNF341,SRSF4,PLAGL1,KLF5,FOSL2,SLC9A1,VDR,SMARCD3,ISG20,ARMC7,NDUFB4,BMP2,TADA2B…
GO:BP	negative regulation of response to stimulus	GO:0048585	FALSE	3.12E-138	137.505	1680	3059	338	78724	RIN3,LAPTM5,GSK3A,PTEN,ASCL2,ELF4,ZDHHC12,LOXL3,TNFRSF1B,HTRA3,CTNNB1,NRG1,MVP,WWP2,EXTL3,BLVRB,RPH3AL,RAB7A,BCL6,ARRB1,ARRDC1,FBXW11,INPP5D,NDFIP1,GRN,MAP4K4,HOMER3,GPR17,SMPDL3A,TFIP11,F12,PRKCD,PGLYRP1,BMP2,APOA1,FRMD8,CR1L,CEACAM1,YWHAG,PTPRE,SYK,KIAA0319,HERPUD1,GRB10,UBASH3B,SESN2,TMEM127,MCTP1,PYCARD,FGR,GHITM,GNAI2,IL1B,CTNNBIP1,SPI1,LGALS1,PRKACA,PPP1R15B,SAP30,CARD16,TLE4,CARD8,MGRN1,SH…
GO:BP	defense response to other organism	GO:0098542	FALSE	3.76E-138	137.425	1263	3059	295	78724	CYBA,NCF1,NLRC4,RNASE2,EMILIN2,RNASEL,S100A12,TFEB,ZDHHC12,TRIM8,CASP1,LILRA5,TYROBP,IFITM1,TICAM1,FCN1,RIPK3,AKIRIN2,CDC42EP4,VPS26B,NLRP3,IL17RA,GRN,SRPK1,SMPDL3A,APOL1,CTSS,FOSL2,F12,CAMP,MAP2K6,UNC13D,PRKCD,ISG20,SLC15A3,PGLYRP1,TMED1,CSF1R,TLR7,WAS,LAMP1,S100A8,CEACAM1,VAV1,TLR8,SYK,MAPKAPK2,HP,FCER1G,GBP6,GRB2,ECSIT,RBCK1,CFP,IL10RB,TOLLIP,PYCARD,FGR,PLEKHM2,CREBBP,JAK2,SRPK2,CCL23,TMEM43,T…
GO:BP	negative regulation of metabolic process	GO:0009892	FALSE	3.90E-136	135.408	3375	3059	480	78724	SEMA4D,MAFG,LAPTM5,HK2,NACC2,GSK3A,CCND3,CEBPA,PTEN,MIER2,RNASEL,ASCL2,ELF4,LOXL3,RRAGD,UPF1,LILRA5,TYROBP,FLOT2,JDP2,CTNNB1,NRG1,MVP,RXRA,WWP2,EXTL3,QSOX1,DEAF1,AKIRIN2,BCL6,ARRB1,TSHZ3,GTPBP1,FBXW11,HCLS1,INPP5D,NDFIP1,GRN,RCOR1,GLA,HOMER3,RAC1,SLIRP,SMG5,TFIP11,CDKN2C,SRSF4,PLAGL1,KLF5,MAP2K6,VDR,PRKCD,PGLYRP1,BMP2,APOA1,TIMP2,CEACAM1,YWHAG,TBC1D14,TLR8,OPRD1,GRB10,MAPKAPK2,HP,BANP,PARP10,HDAC…
GO:BP	regulation of immune response	GO:0050776	FALSE	1.71E-135	134.767	947	3059	256	78724	CYBA,NCF1,NLRC4,LAPTM5,ASCL2,ZDHHC12,LOXL3,CASP1,LILRA5,TYROBP,LILRA6,NFAM1,TNFRSF1B,TICAM1,FCN1,RIPK3,AKIRIN2,BCL6,NLRP3,SASH3,MAPK1,INPP5D,NDFIP1,GRN,GPR17,SMPDL3A,DNASE2,CTSS,FOSL2,MAP2K6,PRKCD,SLC15A3,PGLYRP1,SECTM1,TLR7,WAS,LAMP1,CR1L,S100A8,CEACAM1,YWHAG,VAV1,TLR8,SYK,LIPA,MAPKAPK2,FCER1G,GRB2,ECSIT,RBCK1,PRKD2,CFP,PYCARD,FGR,CREBBP,JAK2,OSCAR,C3AR1,TLR5,BTK,IL1B,SPI1,LGALS1,BATF,PVR,CLEC4E…
GO:BP	regulation of transport	GO:0051049	FALSE	5.19E-135	134.285	1607	3059	327	78724	CYBA,MAP2K2,RIN3,CES1,TRPC6,HK2,GSK3A,PTEN,RNASEL,LILRA5,DYSF,TNFRSF1B,RETN,OS9,CTNNB1,NRG1,RXRA,WWP2,TESC,RPH3AL,FCN1,OAZ2,DIAPH1,ADORA3,RAB7A,ARRB1,CD63,LCP1,MAPK1,HCLS1,CRACR2B,NDFIP1,DNAJC5,MAP4K4,HOMER3,RAC1,CTSS,BTBD9,SLC9A1,MAP2K6,UNC13D,PRKCD,NUP214,BMP2,APOA1,TOR1A,ARHGAP1,C2CD2L,LAMP1,S100A8,CEACAM1,SYK,STXBP2,OPRD1,GRB10,FCER1G,ANKRD13D,UBASH3B,AP2S1,CD151,ASPH,MCTP1,CFP,ATG3,PYCARD,FG…
GO:BP	cell population proliferation	GO:0008283	FALSE	1.51E-134	133.821	2015	3059	365	78724	MAP2K2,MAFG,NACC2,EMILIN2,NDUFS2,CCND3,CEBPA,PTEN,ASCL2,ELF4,TYROBP,WDR13,IFITM1,TNFRSF1B,TICAM1,CTNNB1,NRG1,MVP,SERTAD1,WWP2,EXTL3,TESC,DEAF1,RIPK3,AKIRIN2,ADORA3,BCL6,SASH3,MAPK1,HCLS1,INPP5D,NDFIP1,GRN,DBN1,IFI30,CDKN2C,IL13RA1,FOSL2,CAMP,VDR,SMARCD3,PRKCD,BMP2,APOA1,CSF1R,CEACAM1,HPSE,SYK,RHOG,LIPA,PARP10,ATF5,TMEM127,NACC1,CD151,PRKD2,ASPH,TNFSF18,RAB10,PYCARD,FGR,TSPO,ATXN1L,NUMBL,JAK2,SRPK…
GO:BP	cellular response to stress	GO:0033554	FALSE	8.09E-134	133.092	1830	3059	347	78724	MAP2K2,NCF1,NACC2,SHISA5,CEBPA,PTEN,TFEB,NEK4,RRAGD,CASP1,ZFYVE1,UPF1,SIPA1,TNFRSF1B,OS9,RNF111,MGST1,RIPK3,AKIRIN2,BCL6,RFC2,WIPI1,MSRA,FBXO6,RAD23A,MAPK1,GRN,MAP4K4,PDK3,GNB1L,TFIP11,FBXO27,SLC9A1,MAP2K6,PLIN3,SMARCD3,PRKCD,CETN2,TOR1A,TADA2B,WAS,NCOA6,YWHAG,KIAA0319,OPRD1,HERPUD1,MAPKAPK2,PARP10,MAFB,GRB2,DNAJB12,SESN2,ASCC1,MPND,BACH1,PYCARD,TSPO,PXN,SLC2A1,CREBBP,JAK2,CCM2,RNF138,MTMR3,MAN1A…
GO:BP	small molecule metabolic process	GO:0044281	TRUE	1.19E-130	129.925	1776	3059	338	78724	NDUFB1,CES1,NLRC4,HK2,CHST15,GSK3A,HK3,NDUFS2,CEBPA,SLC16A3,CYB5R3,MPST,TST,CASP1,MGST2,SLC35A2,TP53I3,STAR,PGD,MSRA,GTPBP1,PDXK,APOL2,MAPK1,HSD3B7,GPD2,PDK3,FAR2,NQO2,RPIA,ITPKC,SMPDL3A,APOL1,NDUFB4,ITPK1,BMP2,APOA1,MGST3,PFKFB4,AKR1A1,CEACAM1,GBA2,SYK,TKT,LIPA,MAPKAPK2,LYPLA2,SESN2,SLC7A7,DHRS4,NDUFA1,PYCARD,TSPO,SLC2A1,HMGCR,OSBPL5,TBXAS1,HADHB,UPP1,IL1B,PGM1,DEGS1,ARL2,PRKACA,SLC27A2,APP,GMPR…
GO:BP	cell activation	GO:0001775	FALSE	3.14E-130	129.504	1132	3059	272	78724	LAPTM5,EMILIN2,CCND3,CEBPA,F11R,SELPLG,S100A12,ASCL2,ELF4,LOXL3,LILRA5,TYROBP,DYSF,NFAM1,TNFRSF1B,FLOT2,TICAM1,CTNNB1,RIPK3,AKIRIN2,BCL6,JMJD6,NLRP3,LCP1,IL17RA,SASH3,INPP5D,NDFIP1,GRN,GLA,KLF5,FOSL2,CAMP,UNC13D,SMARCD3,PRKCD,PGLYRP1,SEMA4A,WAS,LAMP1,CEACAM1,YWHAG,VAV1,SYK,STXBP2,LIPA,FCER1G,HDAC5,MAFB,UBASH3B,GRB2,NFIL3,CD151,TNFSF18,FERMT3,TOLLIP,PYCARD,FGR,JAK2,SNX27,BTK,IL1B,MMP8,SPI1,LGALS1,…
GO:BP	transcription by RNA polymerase II	GO:0006366	FALSE	7.19E-129	128.143	2711	3059	417	78724	SEMA4D,MAFG,NACC2,GSK3A,ZNF672,MTF1,CCND3,CEBPA,MIER2,RNASEL,ASCL2,ELF4,TFEB,JDP2,CTNNB1,RXRA,SERTAD1,WWP2,MED16,DEAF1,AKIRIN2,BCL6,ARRB1,TSHZ3,JMJD6,NLRP3,MAPK1,HCLS1,RCOR1,ZNF467,ZNF341,PLAGL1,KLF5,FOSL2,SLC9A1,VDR,SMARCD3,BMP2,TADA2B,TLR7,WAS,NCOA6,ZNF319,RFX1,ERG,ARID3B,HDAC5,ATF5,MAFB,POLR2A,KLF16,NACC1,ANKRD2,NFIL3,PRKD2,FLI1,PCGF3,BACH1,ATXN1L,CREBBP,JAK2,IL1B,MEF2A,CTNNBIP1,SPI1,MLXIP,BAT…
GO:BP	RNA metabolic process	GO:0016070	FALSE	1.11E-126	125.957	6873	3059	701	78724	MAP2K2,NCF1,SEMA4D,MAFG,NLRC4,NACC2,GSK3A,ZNF672,MTF1,RNASE2,CCND3,CEBPA,PTEN,MIER2,RNASEL,S100A12,ASCL2,ELF4,TFEB,NEK4,LOXL3,TRIM8,UPF1,TNFRSF1B,JDP2,CTNNB1,NRG1,RXRA,SERTAD1,WWP2,TESC,MED16,DEAF1,RIPK3,AKIRIN2,ADORA3,BCL6,ARRB1,TSHZ3,JMJD6,GTPBP1,NLRP3,FBXW11,MAPK1,HCLS1,RCOR1,SRPK1,ZNF467,SCAND1,SLIRP,SMG5,TFIP11,ZNF341,SRSF4,PLAGL1,KLF5,FOSL2,SLC9A1,VDR,SMARCD3,PRKCD,ISG20,ARMC7,BMP2,TADA2B,T…
GO:BP	regulation of transcription by RNA polymerase II	GO:0006357	FALSE	1.17E-126	125.932	2578	3059	403	78724	SEMA4D,MAFG,NACC2,GSK3A,ZNF672,MTF1,CCND3,CEBPA,MIER2,RNASEL,ASCL2,ELF4,TFEB,JDP2,CTNNB1,RXRA,SERTAD1,WWP2,MED16,DEAF1,AKIRIN2,BCL6,ARRB1,TSHZ3,JMJD6,NLRP3,MAPK1,HCLS1,RCOR1,ZNF467,ZNF341,PLAGL1,KLF5,FOSL2,SLC9A1,VDR,SMARCD3,BMP2,TADA2B,TLR7,WAS,NCOA6,ZNF319,RFX1,ERG,ARID3B,HDAC5,ATF5,MAFB,KLF16,NACC1,ANKRD2,NFIL3,PRKD2,FLI1,PCGF3,BACH1,ATXN1L,CREBBP,JAK2,IL1B,MEF2A,CTNNBIP1,SPI1,MLXIP,BATF,NR6A1…
GO:BP	response to peptide	GO:1901652	FALSE	7.05E-126	125.152	962	3059	248	78724	AGPAT2,LAPTM5,HK2,DOK1,GSK3A,SYNGR1,CEBPA,SELPLG,CASP1,UPF1,LILRA5,LILRA6,IFITM1,TNFRSF1B,CDC42EP4,VPS26B,IL17RA,LRRC70,MAPK1,HCLS1,GPR17,IL13RA1,KLF5,FOSL2,CAMP,APOA1,CSF1R,TIMP2,SELL,WAS,ACKR1,CEACAM1,SYK,MAPKAPK2,CCRL2,FCER1G,GBP6,NFIL3,TNFSF18,IL10RB,TOLLIP,PYCARD,NUMBL,JAK2,CCL23,BTK,IL1B,MMP8,SPI1,IFITM2,PRKACA,CARD16,TLE4,LSP1,KLF2,APP,CARD8,CORO1A,SHARPIN,CSF2RA,SMPD3,EIF4E2,TLR2,PLSCR1,N…
GO:BP	regulation of molecular function	GO:0065009	FALSE	1.01E-125	124.995	1496	3059	305	78724	MAP2K2,NCF1,SEMA4D,NLRC4,TRPC6,CTSB,GSK3A,CCND3,PTEN,S100A12,MARK2,ARAP1,TBC1D10B,UBE2S,TRIM8,LILRA5,PSENEN,NRG1,MVP,RXRA,SERTAD1,WWP2,TESC,RIPK3,ADORA3,RFC2,ARRB1,NDFIP1,GRN,GLA,MAP4K4,TFIP11,CTSS,CDKN2C,SLC9A1,VDR,PRKCD,RALGAPA2,BMP2,APOA1,CSF1R,TBC1D2,TIMP2,S100A8,CEACAM1,YWHAG,VAV1,SYK,RAB3GAP2,OPRD1,RHOG,HP,PARP10,HDAC5,ECSIT,RBCK1,PRKD2,ASPH,TNFSF18,PYCARD,FGR,SORT1,JAK2,AKAP5,GNAI2,BTK,IL1…
GO:BP	macromolecule catabolic process	GO:0009057	FALSE	1.24E-125	124.908	1417	3059	297	78724	VPS37B,CTSD,CTSB,LAPTM5,GSK3A,NSFL1C,RNASE2,CEBPA,PTEN,RNASEL,ANAPC11,UBE2S,UPF1,KLHL8,TNFRSF1B,OS9,CTNNB1,RNF111,WWP2,OAZ2,TSPAN17,AKIRIN2,RAB7A,ARRB1,ARRDC1,WIPI1,GTPBP1,FBXO6,IL17RA,RAD23A,FBXW11,NDFIP1,DCAF11,SLIRP,SMG5,DNASE2,CTSS,FBXO27,MANBA,PRKCD,ISG20,PGLYRP1,TOR1A,TIMP2,CEACAM1,HPSE,UBA52,HERPUD1,RNF144B,LIPA,MAPKAPK2,BANP,LYPLA2,PPP1R3D,VPS37C,DNAJB12,RBCK1,TOLLIP,ATG3,HMGCR,MAN1A1,RNA…
GO:BP	establishment of protein localization	GO:0045184	FALSE	3.04E-125	124.518	1937	3059	346	78724	NCF1,NDUFB1,VPS37B,CTSD,RAB5C,LAPTM5,ARL8A,HK2,RANBP3,COPA,GSK3A,SYNGR1,LMTK2,DENND1A,AP1B1,DYNLT1,RAB32,ZDHHC12,EXOC3,OS9,MVP,WWP2,TIMM17B,TESC,TOM1,RPH3AL,OAZ2,TSPAN17,AKIRIN2,RAB7A,ARRB1,ARRDC1,CD63,HSPA1L,STX10,VPS26B,LCP1,RP2,HCLS1,NDFIP1,TAP1,MAP4K4,HOMER3,RAB24,RAB13,CD68,PRKCD,CETN2,SLC15A3,NUP214,TMED1,CLSTN1,ARHGAP1,C2CD2L,LAMP1,YWHAG,HPSE,SYK,RAB3GAP2,STXBP2,HERPUD1,ITSN1,AP2S1,VPS37C,…
GO:BP	negative regulation of macromolecule metabolic process	GO:0010605	FALSE	5.74E-124	123.241	3157	3059	445	78724	SEMA4D,MAFG,LAPTM5,NACC2,GSK3A,CCND3,CEBPA,PTEN,MIER2,RNASEL,ASCL2,ELF4,LOXL3,UPF1,LILRA5,TYROBP,FLOT2,JDP2,CTNNB1,NRG1,MVP,RXRA,WWP2,EXTL3,DEAF1,AKIRIN2,BCL6,ARRB1,TSHZ3,GTPBP1,FBXW11,HCLS1,INPP5D,NDFIP1,RCOR1,HOMER3,RAC1,SLIRP,SMG5,TFIP11,SRSF4,PLAGL1,KLF5,VDR,PRKCD,PGLYRP1,BMP2,APOA1,TIMP2,CEACAM1,YWHAG,TLR8,OPRD1,GRB10,MAPKAPK2,BANP,PARP10,HDAC5,ATF5,MAFB,KLF16,SESN2,NACC1,TDRD9,ANKRD2,NFIL3,…
GO:BP	positive regulation of nucleobase-containing compound metabolic process	GO:0045935	FALSE	7.84E-124	123.106	2036	3059	353	78724	MAP2K2,NCF1,MAFG,GSK3A,MTF1,CEBPA,RNASEL,ASCL2,ELF4,TFEB,NEK4,TRIM8,UPF1,TNFRSF1B,CTNNB1,RXRA,SERTAD1,WWP2,TESC,MED16,DEAF1,RIPK3,AKIRIN2,RFC2,ARRB1,JMJD6,GTPBP1,NLRP3,FBXW11,MAPK1,HCLS1,SCAND1,ZNF341,PLAGL1,KLF5,FOSL2,SLC9A1,VDR,SMARCD3,PRKCD,BMP2,TADA2B,TLR7,WAS,NCOA6,ZNF319,RHOG,ERG,ARID3B,BANP,HDAC5,ATF5,MAFB,RBCK1,NFIL3,PRKD2,ASPH,FLI1,BACH1,CREBBP,JAK2,IL1B,MEF2A,MLLT1,SPI1,MLXIP,BATF,PDGFR…
GO:BP	regulation of programmed cell death	GO:0043067	FALSE	3.20E-123	122.495	1506	3059	303	78724	SEMA4D,CTSD,NLRC4,CTSB,LAPTM5,NACC2,EMILIN2,CASP1,TNFRSF1B,HS1BP3,CTNNB1,NRG1,RIPK3,BCL6,HCLS1,INPP5D,DNAJC5,GRN,MAP4K4,CTSS,TNFRSF12A,SLC9A1,MAP2K6,VDR,PRKCD,BMP2,TEX261,CSF1R,AKR1A1,S100A8,SYK,HERPUD1,RNF144B,ATF5,RBCK1,PRKD2,TNFSF18,PYCARD,TSPO,JAK2,SRPK2,GHITM,GNAI2,BTK,IL1B,GBE1,LGALS1,CARD16,PA2G4,CEBPB,SLC46A2,S100A9,CARD8,TNFRSF8,CORO1A,IGF2R,MAEA,STYXL1,NF2,RUVBL2,PTTG1IP,PLAUR,SHC1,ARF4…
GO:BP	nucleic acid biosynthetic process	GO:0141187	FALSE	8.36E-123	122.078	6782	3059	688	78724	MAP2K2,NCF1,SEMA4D,MAFG,NLRC4,NACC2,GSK3A,ZNF672,MTF1,CCND3,CEBPA,PTEN,MIER2,RNASEL,S100A12,ASCL2,ELF4,TFEB,NEK4,LOXL3,TRIM8,UPF1,JDP2,CTNNB1,NRG1,RXRA,SERTAD1,WWP2,TESC,MED16,DEAF1,RIPK3,AKIRIN2,ADORA3,BCL6,RFC2,ARRB1,TSHZ3,JMJD6,NLRP3,FBXW11,MAPK1,HCLS1,RCOR1,SRPK1,ZNF467,SCAND1,SLIRP,SMG5,TFIP11,ZNF341,SRSF4,PLAGL1,KLF5,FOSL2,SLC9A1,VDR,SMARCD3,ISG20,ARMC7,BMP2,TADA2B,TLR7,WAS,NCOA6,S100A8,ZNF…
GO:BP	intracellular transport	GO:0046907	FALSE	9.29E-123	122.032	1381	3059	290	78724	MAP2K2,VPS37B,CES1,RAB5C,LAPTM5,ARL8A,RANBP3,COPA,LMTK2,DENND1A,AP1B1,RAB32,TBC1D10B,UPF1,FLOT2,OS9,TIMM17B,TOM1,RPH3AL,OAZ2,AKIRIN2,RAB7A,STAR,CD63,WIPI1,STX10,VPS26B,LCP1,FBXW11,MAPK1,HCLS1,NDFIP1,GRN,REPS2,TAP1,RAB24,MAP1S,RAB13,SMG5,SLC66A2,PRKCD,TRAPPC3,NUP214,TMED1,TEX261,ARHGAP1,WAS,LAMP1,TBC1D14,SYK,RAB3GAP2,STXBP2,HERPUD1,LIPA,ITSN1,AP2S1,VPS37C,AGFG1,ASPH,RAB10,SORT1,JAK2,SNX27,TECPR2,A…
GO:BP	response to cytokine	GO:0034097	FALSE	9.55E-123	122.02	947	3059	243	78724	AGPAT2,LAPTM5,HK2,DOK1,GSK3A,SYNGR1,CEBPA,SELPLG,CASP1,UPF1,LILRA5,LILRA6,IFITM1,TNFRSF1B,CDC42EP4,VPS26B,IL17RA,LRRC70,MAPK1,HCLS1,GPR17,IL13RA1,KLF5,FOSL2,CAMP,APOA1,CSF1R,TIMP2,SELL,WAS,ACKR1,CEACAM1,SYK,MAPKAPK2,CCRL2,FCER1G,GBP6,NFIL3,TNFSF18,IL10RB,TOLLIP,PYCARD,NUMBL,JAK2,CCL23,BTK,IL1B,MMP8,SPI1,IFITM2,PRKACA,CARD16,TLE4,LSP1,KLF2,APP,CARD8,CORO1A,SHARPIN,CSF2RA,SMPD3,EIF4E2,TLR2,PLSCR1,N…
GO:BP	import into cell	GO:0098657	FALSE	1.02E-121	120.991	922	3059	239	78724	CYBA,RIN3,RAB5C,CACNA1E,DENND1A,TYROBP,DYSF,NRG1,TOM1,FCN1,RAB7A,ARRB1,RNASEK,CD63,JMJD6,MAPK1,SLC36A1,REPS2,RAC1,ASGR2,SLC1A5,BTBD9,SLC9A1,UNC13D,PRKCD,SLC15A3,APOA1,TOR1A,CEACAM1,VAV1,SYK,RHOG,LIPA,MAPKAPK2,ITSN1,CEACAM4,FCER1G,ANKRD13D,GRB2,AP2S1,CD151,MCTP1,CFP,EPN1,ATG3,PYCARD,FGR,SORT1,SLC2A1,AKAP5,BTK,SYP,BIN2,NEURL3,CLTA,SLC43A2,SLC27A2,APP,SLC46A2,CORO1A,IGF2R,TBC1D2B,TLR2,ARF1,EHD4,PLSC…
GO:BP	innate immune response	GO:0045087	FALSE	1.62E-121	120.789	984	3059	246	78724	CYBA,NCF1,NLRC4,RNASE2,S100A12,TFEB,ZDHHC12,TRIM8,CASP1,LILRA5,TYROBP,IFITM1,TICAM1,FCN1,AKIRIN2,CDC42EP4,VPS26B,NLRP3,IL17RA,GRN,SRPK1,SMPDL3A,APOL1,CTSS,FOSL2,F12,CAMP,MAP2K6,UNC13D,ISG20,SLC15A3,PGLYRP1,TMED1,CSF1R,TLR7,WAS,LAMP1,S100A8,CEACAM1,VAV1,TLR8,SYK,MAPKAPK2,FCER1G,GBP6,GRB2,ECSIT,CFP,IL10RB,TOLLIP,PYCARD,FGR,PLEKHM2,CREBBP,JAK2,SRPK2,TMEM43,TLR5,RNASE3,BTK,SPI1,NEURL3,LCN2,IFITM2,PVR…
GO:BP	cell motility	GO:0048870	FALSE	1.98E-121	120.703	1793	3059	328	78724	MAP2K2,LAMTOR2,RIN3,MIIP,SEMA4D,GSK3A,EMILIN2,PTEN,ANKS1A,F11R,SELPLG,S100A12,ASCL2,MARK2,GAB1,ARPC2,IFITM1,CTNNB1,RIPK3,ADORA3,BCL6,CD63,KIAA0319L,LCP1,IL17RA,DPCD,MAPK1,HSD3B7,GRN,S100P,MAP4K4,GFRA3,RAC1,RAB13,SLIRP,LAMB3,SLC9A1,PRKCD,TMSB10,BMP2,SEMA4A,APOA1,TOR1A,CSF1R,SELL,WAS,S100A8,CEACAM1,VAV1,SYK,KIAA0319,RHOG,GRB10,CCRL2,FCER1G,HDAC5,CD151,PRKD2,RASGEF1A,TNFSF18,MCTP1,FERMT3,PYCARD,FGR,…
GO:BP	defense response to symbiont	GO:0140546	FALSE	1.46E-120	119.836	1082	3059	256	78724	CYBA,NCF1,NLRC4,RNASE2,S100A12,TFEB,ZDHHC12,TRIM8,CASP1,LILRA5,TYROBP,IFITM1,TICAM1,FCN1,AKIRIN2,CDC42EP4,VPS26B,NLRP3,IL17RA,GRN,SRPK1,SMPDL3A,APOL1,CTSS,FOSL2,F12,CAMP,MAP2K6,UNC13D,ISG20,SLC15A3,PGLYRP1,TMED1,CSF1R,TLR7,WAS,LAMP1,S100A8,CEACAM1,VAV1,TLR8,SYK,MAPKAPK2,FCER1G,GBP6,GRB2,ECSIT,CFP,IL10RB,TOLLIP,PYCARD,FGR,PLEKHM2,CREBBP,JAK2,SRPK2,CCL23,TMEM43,TLR5,RNASE3,BTK,SPI1,NEURL3,LCN2,IFIT…
GO:BP	leukocyte activation	GO:0045321	FALSE	4.70E-120	119.328	980	3059	244	78724	LAPTM5,CCND3,CEBPA,SELPLG,S100A12,ASCL2,ELF4,LOXL3,TYROBP,DYSF,NFAM1,TNFRSF1B,FLOT2,TICAM1,CTNNB1,RIPK3,AKIRIN2,BCL6,JMJD6,NLRP3,LCP1,SASH3,INPP5D,NDFIP1,GRN,FOSL2,CAMP,UNC13D,SMARCD3,PRKCD,PGLYRP1,SEMA4A,WAS,LAMP1,CEACAM1,YWHAG,VAV1,SYK,STXBP2,LIPA,FCER1G,HDAC5,MAFB,GRB2,NFIL3,CD151,TNFSF18,TOLLIP,PYCARD,FGR,JAK2,SNX27,BTK,IL1B,MMP8,SPI1,LGALS1,BATF,CLEC4E,CEBPB,APP,SLC46A2,CORO1A,PREX1,BRD4,APB…
GO:BP	positive regulation of RNA metabolic process	GO:0051254	FALSE	5.36E-120	119.271	1835	3059	330	78724	MAP2K2,NCF1,MAFG,GSK3A,MTF1,CEBPA,RNASEL,ASCL2,ELF4,TFEB,NEK4,TRIM8,UPF1,TNFRSF1B,CTNNB1,RXRA,SERTAD1,WWP2,TESC,MED16,DEAF1,RIPK3,AKIRIN2,ARRB1,JMJD6,GTPBP1,NLRP3,FBXW11,HCLS1,SCAND1,ZNF341,PLAGL1,KLF5,FOSL2,SLC9A1,VDR,SMARCD3,BMP2,TADA2B,TLR7,WAS,NCOA6,ZNF319,RHOG,ERG,ARID3B,BANP,HDAC5,ATF5,MAFB,RBCK1,NFIL3,PRKD2,ASPH,FLI1,BACH1,CREBBP,JAK2,IL1B,MEF2A,MLLT1,SPI1,MLXIP,BATF,NR6A1,PRDX6,CEBPB,KLF2…
GO:BP	cell migration	GO:0016477	FALSE	2.57E-119	118.59	1534	3059	301	78724	LAMTOR2,RIN3,MIIP,SEMA4D,GSK3A,EMILIN2,PTEN,ANKS1A,F11R,SELPLG,S100A12,ASCL2,MARK2,GAB1,IFITM1,CTNNB1,RIPK3,ADORA3,CD63,KIAA0319L,LCP1,IL17RA,MAPK1,HSD3B7,GRN,S100P,MAP4K4,GFRA3,RAC1,RAB13,LAMB3,SLC9A1,PRKCD,TMSB10,BMP2,SEMA4A,APOA1,TOR1A,CSF1R,SELL,S100A8,CEACAM1,VAV1,SYK,KIAA0319,RHOG,GRB10,CCRL2,FCER1G,HDAC5,CD151,PRKD2,RASGEF1A,TNFSF18,MCTP1,FERMT3,PYCARD,FGR,TSPO,PXN,MOSPD2,JAK2,CCL23,C3AR1,…
GO:BP	regulation of apoptotic process	GO:0042981	FALSE	1.72E-118	117.765	1462	3059	293	78724	SEMA4D,CTSD,NLRC4,CTSB,NACC2,EMILIN2,CASP1,TNFRSF1B,HS1BP3,CTNNB1,NRG1,RIPK3,BCL6,HCLS1,INPP5D,DNAJC5,GRN,MAP4K4,CTSS,TNFRSF12A,SLC9A1,MAP2K6,VDR,PRKCD,BMP2,TEX261,CSF1R,AKR1A1,S100A8,HERPUD1,RNF144B,ATF5,RBCK1,PRKD2,TNFSF18,PYCARD,TSPO,JAK2,SRPK2,GHITM,GNAI2,BTK,IL1B,GBE1,LGALS1,CARD16,PA2G4,CEBPB,SLC46A2,S100A9,CARD8,TNFRSF8,CORO1A,IGF2R,MAEA,STYXL1,NF2,RUVBL2,PTTG1IP,PLAUR,SHC1,ARF4,MFN2,G6PD,…
GO:BP	protein transport	GO:0015031	FALSE	2.68E-118	117.571	1444	3059	291	78724	VPS37B,RAB5C,LAPTM5,ARL8A,RANBP3,COPA,LMTK2,DENND1A,AP1B1,DYNLT1,RAB32,EXOC3,OS9,MVP,WWP2,TIMM17B,TESC,TOM1,RPH3AL,OAZ2,AKIRIN2,RAB7A,ARRB1,ARRDC1,CD63,STX10,VPS26B,LCP1,RP2,HCLS1,NDFIP1,TAP1,MAP4K4,RAB24,RAB13,PRKCD,CETN2,SLC15A3,NUP214,TMED1,CLSTN1,ARHGAP1,C2CD2L,HPSE,SYK,RAB3GAP2,STXBP2,HERPUD1,ITSN1,AP2S1,VPS37C,IST1,ASPH,RAB10,ATG3,SORT1,PCSK5,JAK2,SNX27,SNAP29,HMGCR,TECPR2,AKAP5,ATP6AP1,IL1…
GO:BP	RNA biosynthetic process	GO:0032774	FALSE	1.69E-116	115.771	6671	3059	669	78724	MAP2K2,NCF1,SEMA4D,MAFG,NLRC4,NACC2,GSK3A,ZNF672,MTF1,CCND3,CEBPA,PTEN,MIER2,RNASEL,S100A12,ASCL2,ELF4,TFEB,NEK4,LOXL3,TRIM8,UPF1,JDP2,CTNNB1,NRG1,RXRA,SERTAD1,WWP2,TESC,MED16,DEAF1,RIPK3,AKIRIN2,ADORA3,BCL6,ARRB1,TSHZ3,JMJD6,NLRP3,FBXW11,MAPK1,HCLS1,RCOR1,SRPK1,ZNF467,SCAND1,SLIRP,TFIP11,ZNF341,SRSF4,PLAGL1,KLF5,FOSL2,SLC9A1,VDR,SMARCD3,ISG20,ARMC7,BMP2,TADA2B,TLR7,WAS,NCOA6,S100A8,ZNF319,SYK,RF…
GO:BP	regulation of multicellular organismal development	GO:2000026	FALSE	1.33E-114	113.876	1418	3059	284	78724	MAP2K2,SEMA4D,MAFG,TWF2,HK2,GSK3A,B4GALT5,EMILIN2,CEBPA,PTEN,DYNLT1,F11R,ASCL2,LOXL3,TYROBP,GAB1,NFAM1,TNFRSF1B,RETN,CTNNB1,NRG1,RXRA,EXTL3,TESC,BCL6,NLRP3,SASH3,HCLS1,INPP5D,NDFIP1,GRN,RCOR1,CD101,DBN1,DIP2B,CAMP,VDR,SMARCD3,PGLYRP1,BMP2,SEMA4A,CLSTN1,CEACAM1,HPSE,SYK,KIAA0319,MAFB,UBASH3B,IST1,PRKD2,EPN1,TSPO,NUMBL,CCM2,C3AR1,BTK,IL1B,CTNNBIP1,SPI1,LGALS1,BATF,CEBPB,KLF2,SLC46A2,SPINT1,BRD4,EGL…
GO:BP	positive regulation of DNA-templated transcription	GO:0045893	FALSE	1.86E-113	112.73	1697	3059	309	78724	MAP2K2,NCF1,MAFG,GSK3A,MTF1,CEBPA,RNASEL,ASCL2,ELF4,TFEB,NEK4,TRIM8,CTNNB1,RXRA,SERTAD1,WWP2,TESC,MED16,DEAF1,RIPK3,AKIRIN2,ARRB1,JMJD6,NLRP3,FBXW11,HCLS1,SCAND1,ZNF341,PLAGL1,KLF5,FOSL2,SLC9A1,VDR,SMARCD3,BMP2,TADA2B,TLR7,WAS,NCOA6,ZNF319,RHOG,ERG,ARID3B,BANP,HDAC5,ATF5,MAFB,RBCK1,NFIL3,PRKD2,ASPH,FLI1,BACH1,CREBBP,JAK2,IL1B,MEF2A,MLLT1,SPI1,MLXIP,BATF,NR6A1,CEBPB,KLF2,APP,IER2,PCBD1,BRD4,EGLN1,…
GO:BP	positive regulation of RNA biosynthetic process	GO:1902680	FALSE	2.59E-113	112.587	1699	3059	309	78724	MAP2K2,NCF1,MAFG,GSK3A,MTF1,CEBPA,RNASEL,ASCL2,ELF4,TFEB,NEK4,TRIM8,CTNNB1,RXRA,SERTAD1,WWP2,TESC,MED16,DEAF1,RIPK3,AKIRIN2,ARRB1,JMJD6,NLRP3,FBXW11,HCLS1,SCAND1,ZNF341,PLAGL1,KLF5,FOSL2,SLC9A1,VDR,SMARCD3,BMP2,TADA2B,TLR7,WAS,NCOA6,ZNF319,RHOG,ERG,ARID3B,BANP,HDAC5,ATF5,MAFB,RBCK1,NFIL3,PRKD2,ASPH,FLI1,BACH1,CREBBP,JAK2,IL1B,MEF2A,MLLT1,SPI1,MLXIP,BATF,NR6A1,CEBPB,KLF2,APP,IER2,PCBD1,BRD4,EGLN1,…
GO:BP	cellular response to cytokine stimulus	GO:0071345	FALSE	5.06E-113	112.296	854	3059	222	78724	AGPAT2,LAPTM5,HK2,DOK1,GSK3A,SYNGR1,CEBPA,SELPLG,CASP1,UPF1,LILRA5,LILRA6,IFITM1,TNFRSF1B,CDC42EP4,VPS26B,IL17RA,MAPK1,HCLS1,GPR17,IL13RA1,KLF5,CAMP,APOA1,CSF1R,WAS,ACKR1,CEACAM1,SYK,MAPKAPK2,CCRL2,FCER1G,GBP6,NFIL3,TNFSF18,IL10RB,TOLLIP,PYCARD,NUMBL,JAK2,CCL23,BTK,IL1B,MMP8,SPI1,IFITM2,PRKACA,CARD16,TLE4,LSP1,KLF2,CARD8,CORO1A,SHARPIN,CSF2RA,SMPD3,EIF4E2,TLR2,NR1H3,STXBP3,MAP3K5,IFNAR1,PADI2,SH2…
GO:BP	cellular component biogenesis	GO:0044085	FALSE	9.89E-113	112.005	4980	3059	555	78724	POMP,CYBA,NDUFB1,SEMA4D,VPS37B,TWF2,CTSD,NLRC4,NACC2,NSFL1C,NDUFS2,LRRC61,PTEN,AP1B1,RAB32,F11R,RNASEL,CAPG,ARAP1,ZDHHC12,UBE2S,CASP1,ZFYVE1,ARPC2,CLCN4,TICAM1,CTNNB1,NRG1,FKBP4,QSOX1,TOM1,MED16,SAMD8,DIAPH1,RAB7A,CDC42EP4,ARRB1,ARRDC1,WIPI1,JMJD6,NLRP3,FLII,PSTPIP2,LCP1,RP2,TMEM120A,HCLS1,REPS2,MSRB2,MAP4K4,SCLT1,SRPK1,RAC1,RAB13,SLC1A5,LAMB3,TFIP11,LRFN1,KLF5,SLC9A1,ATG9A,DUSP23,PRKCD,TRAPPC3,C…
GO:BP	regulation of defense response	GO:0031347	FALSE	2.06E-112	111.687	809	3059	216	78724	CYBA,NCF1,NLRC4,EMILIN2,CEBPA,S100A12,ELF4,ZDHHC12,CASP1,LILRA5,TYROBP,TNFRSF1B,MGST2,TICAM1,EXTL3,FCN1,AKIRIN2,BCL6,NLRP3,IL17RA,NDFIP1,GRN,GPR17,SMPDL3A,CTSS,F12,MAP2K6,PRKCD,SLC15A3,PGLYRP1,APOA1,TLR7,LAMP1,S100A8,CEACAM1,VAV1,TLR8,SYK,MAPKAPK2,ECSIT,PYCARD,FGR,CREBBP,JAK2,TLR5,BTK,IL1B,MMP8,SPI1,LGALS1,PVR,CLEC4E,CARD16,CEBPB,APP,SLC46A2,S100A9,CARD8,SHARPIN,AOAH,TRAFD1,NT5C2,BRD4,FUT7,EIF4E2…
GO:BP	cell adhesion	GO:0007155	FALSE	1.60E-111	110.795	1530	3059	291	78724	SEMA4D,LAPTM5,EMILIN2,PTEN,F11R,SELPLG,ASCL2,PCDH1,LOXL3,SIPA1,DGCR2,ARPC2,FLOT2,CTNNB1,NRG1,TESC,BCL6,CD63,NLRP3,SASH3,NDFIP1,GLA,MAP4K4,RAC1,LAMB3,TNFRSF12A,SLC9A1,UNC13D,SMARCD3,PRKCD,BMP2,APOA1,CLSTN1,TOR1A,SELL,S100A8,CEACAM1,YWHAG,VAV1,HPSE,SYK,UBASH3B,CD151,PRKD2,TNFSF18,FERMT3,RAB10,PYCARD,PXN,JAK2,IL1B,SERPINB8,SPI1,LGALS1,PTPN23,MPZL2,ARL2,PVR,SIGLEC5,CEBPB,APP,TJP2,S100A9,CORO1A,MAEA,P…
GO:BP	proteolysis	GO:0006508	FALSE	7.32E-111	110.135	1486	3059	286	78724	VPS37B,CTSD,NLRC4,CTSB,LAPTM5,GSK3A,NSFL1C,CEBPA,PTEN,ASPRV1,ANAPC11,UBE2S,CASP1,KLHL8,PSENEN,TNFRSF1B,OS9,HTRA3,CTNNB1,RNF111,WWP2,FCN1,TSPAN17,AKIRIN2,ARRB1,ARRDC1,FBXO6,RAD23A,FBXW11,RNPEPL1,NDFIP1,GRN,DCAF11,CTSS,FBXO27,F12,TOR1A,TIMP2,UBA52,AURKAIP1,HERPUD1,RNF144B,HP,MAFB,VPS37C,DNAJB12,RBCK1,IST1,ASPH,MPND,TOLLIP,PCSK5,MAN1A1,IL1B,CHMP4B,FBXO45,MMP8,PRSS57,SERPINB8,CHMP2A,PTPN23,PRKACA,PSM…
GO:BP	regulation of cell population proliferation	GO:0042127	FALSE	2.01E-110	109.698	1685	3059	304	78724	MAFG,NACC2,EMILIN2,CCND3,CEBPA,PTEN,ASCL2,TYROBP,WDR13,IFITM1,TNFRSF1B,TICAM1,CTNNB1,NRG1,SERTAD1,WWP2,EXTL3,TESC,DEAF1,RIPK3,AKIRIN2,ADORA3,BCL6,SASH3,MAPK1,HCLS1,INPP5D,NDFIP1,GRN,IFI30,CDKN2C,IL13RA1,FOSL2,CAMP,VDR,SMARCD3,BMP2,CSF1R,CEACAM1,HPSE,SYK,RHOG,PARP10,ATF5,TMEM127,NACC1,PRKD2,ASPH,TNFSF18,PYCARD,TSPO,ATXN1L,JAK2,SRPK2,CCL23,GNAI2,BTK,IL1B,CTNNBIP1,MAP3K3,PDGFRB,CEBPB,APP,TNFRSF8,COR…
GO:BP	negative regulation of cell communication	GO:0010648	FALSE	4.53E-109	108.344	1436	3059	279	78724	LAPTM5,GSK3A,PTEN,ZDHHC12,HTRA3,CTNNB1,NRG1,MVP,WWP2,BLVRB,RPH3AL,RAB7A,BCL6,ARRB1,ARRDC1,FBXW11,INPP5D,MAP4K4,HOMER3,SMPDL3A,PRKCD,BMP2,APOA1,FRMD8,CEACAM1,YWHAG,PTPRE,HERPUD1,GRB10,UBASH3B,SESN2,TMEM127,PYCARD,TSPO,GHITM,GNAI2,IL1B,CTNNBIP1,SPI1,PRKACA,PPP1R15B,SAP30,CARD16,TLE4,CARD8,MGRN1,ZNF592,BRD4,DGKG,YWHAB,SMPD3,EIF4E2,CCDC22,NF2,RUVBL2,PTTG1IP,PLAUR,TBC1D10C,ARF1,SAP30L,MFN2,LTF,NR1H3,K…
GO:BP	negative regulation of signaling	GO:0023057	FALSE	2.45E-108	107.612	1435	3059	278	78724	LAPTM5,GSK3A,PTEN,ZDHHC12,HTRA3,CTNNB1,NRG1,MVP,WWP2,BLVRB,RPH3AL,RAB7A,BCL6,ARRB1,ARRDC1,FBXW11,INPP5D,MAP4K4,HOMER3,SMPDL3A,PRKCD,BMP2,APOA1,FRMD8,CEACAM1,YWHAG,PTPRE,HERPUD1,GRB10,UBASH3B,SESN2,TMEM127,PYCARD,TSPO,GHITM,GNAI2,IL1B,CTNNBIP1,SPI1,PRKACA,PPP1R15B,SAP30,CARD16,TLE4,CARD8,MGRN1,ZNF592,BRD4,DGKG,YWHAB,SMPD3,EIF4E2,CCDC22,NF2,RUVBL2,PTTG1IP,PLAUR,TBC1D10C,ARF1,SAP30L,MFN2,LTF,NR1H3,K…
GO:BP	phosphorylation	GO:0016310	FALSE	1.15E-107	106.939	1320	3059	266	78724	MAP2K2,NCF1,SEMA4D,HK2,GSK3A,HK3,CCND3,LMTK2,PTEN,RNASEL,S100A12,MARK2,NEK4,LILRA5,AATK,MAST3,NRG1,MVP,SERTAD1,RIPK3,ARRB1,MAPK1,HCLS1,MAP4K4,PDK3,SRPK1,RAC1,CDKN2C,MAP2K6,PRKCD,MAP3K6,BMP2,APOA1,CSF1R,TLR7,PFKFB4,CEACAM1,YWHAG,TLR8,GRK6,SYK,OPRD1,GRB10,ERG,MAPKAPK2,SESN2,PRKD2,TNFSF18,TOLLIP,PYCARD,FGR,JAK2,SRPK2,BTK,IL1B,MAP3K3,CLK3,PDGFRB,PRKACA,PPP1R15B,APP,ZNF592,DGKG,SMPD3,LRRK1,NF2,CAMKK2,…
GO:BP	regulation of cell differentiation	GO:0045595	FALSE	2.55E-107	106.593	1576	3059	290	78724	MAP2K2,SEMA4D,MAFG,TWF2,GSK3A,CEBPA,PTEN,DYNLT1,F11R,ASCL2,LOXL3,TYROBP,IFITM1,NFAM1,TNFRSF1B,FLOT2,JDP2,CTNNB1,NRG1,EXTL3,TESC,AKIRIN2,BCL6,NLRP3,SASH3,MAPK1,HCLS1,INPP5D,NDFIP1,GRN,RCOR1,CD101,DBN1,KLF5,DIP2B,FOSL2,ATP11A,VDR,SMARCD3,PGLYRP1,BMP2,CEACAM1,YWHAG,SYK,KIAA0319,HDAC5,MAFB,UBASH3B,ANKRD2,IST1,HMG20B,TSPO,SORT1,NUMBL,JAK2,BTK,IL1B,CTNNBIP1,SPI1,LGALS1,BATF,PRKACA,PA2G4,CEBPB,APP,SLC46…
GO:BP	cellular component assembly	GO:0022607	FALSE	2.58E-107	106.588	4719	3059	528	78724	POMP,CYBA,NDUFB1,SEMA4D,VPS37B,TWF2,CTSD,NLRC4,NACC2,NSFL1C,NDUFS2,LRRC61,PTEN,AP1B1,RAB32,F11R,CAPG,ARAP1,ZDHHC12,UBE2S,CASP1,ZFYVE1,ARPC2,CLCN4,TICAM1,CTNNB1,NRG1,FKBP4,QSOX1,TOM1,MED16,DIAPH1,RAB7A,CDC42EP4,ARRB1,WIPI1,JMJD6,NLRP3,FLII,PSTPIP2,LCP1,RP2,TMEM120A,HCLS1,REPS2,MSRB2,MAP4K4,SCLT1,SRPK1,RAC1,RAB13,SLC1A5,LAMB3,TFIP11,LRFN1,KLF5,SLC9A1,ATG9A,DUSP23,PRKCD,TRAPPC3,CETN2,NDUFB4,SHKBP1,S…
GO:BP	lipid metabolic process	GO:0006629	FALSE	4.32E-106	105.365	1391	3059	271	78724	AGPAT2,CES1,OPA3,B4GALT5,CEBPA,PTEN,CYB5R3,B3GALT4,MGST2,AGPAT3,SAMD8,RAB7A,STAR,APOL2,MAPK1,INPP5D,HSD3B7,GLA,PDK3,FAR2,ITPKC,SMPDL3A,APOL1,PRKCD,BMP2,APOA1,MGST3,AKR1A1,CEACAM1,GBA2,GM2A,LIPA,CDIPT,LYPLA2,SESN2,DHRS4,PRKD2,TM9SF2,PTDSS2,TSPO,HMGCR,OSBPL5,TBXAS1,MTMR3,TMEM43,HADHB,IL1B,DEGS1,PRDX6,PRKACA,SLC27A2,HSD17B11,APP,GBGT1,AOAH,ALOXE3,DGKG,FUT7,SMPD3,DHRS7,HSD17B4,PLSCR1,G6PD,ACOT8,NR1H3…
GO:BP	negative regulation of signal transduction	GO:0009968	FALSE	1.58E-105	104.8	1326	3059	264	78724	LAPTM5,GSK3A,PTEN,ZDHHC12,HTRA3,CTNNB1,NRG1,MVP,WWP2,BLVRB,RPH3AL,RAB7A,BCL6,ARRB1,ARRDC1,FBXW11,INPP5D,HOMER3,SMPDL3A,PRKCD,BMP2,APOA1,FRMD8,CEACAM1,YWHAG,PTPRE,HERPUD1,GRB10,UBASH3B,SESN2,TMEM127,PYCARD,GHITM,GNAI2,IL1B,CTNNBIP1,SPI1,PRKACA,PPP1R15B,SAP30,CARD16,TLE4,CARD8,MGRN1,ZNF592,BRD4,DGKG,YWHAB,SMPD3,EIF4E2,CCDC22,NF2,RUVBL2,PTTG1IP,PLAUR,TBC1D10C,SAP30L,MFN2,LTF,NR1H3,KREMEN1,RGS19,PINK…
GO:BP	positive regulation of immune response	GO:0050778	FALSE	1.89E-105	104.722	760	3059	203	78724	CYBA,NLRC4,LAPTM5,ZDHHC12,CASP1,TYROBP,NFAM1,TICAM1,FCN1,AKIRIN2,NLRP3,SASH3,MAPK1,INPP5D,SMPDL3A,CTSS,FOSL2,MAP2K6,PRKCD,SLC15A3,SECTM1,TLR7,LAMP1,CR1L,S100A8,CEACAM1,YWHAG,VAV1,TLR8,SYK,LIPA,MAPKAPK2,FCER1G,GRB2,ECSIT,RBCK1,PRKD2,CFP,PYCARD,FGR,CREBBP,JAK2,C3AR1,TLR5,BTK,IL1B,SPI1,PVR,CLEC4E,SLC46A2,S100A9,CARD8,BRD4,TLR2,ZCCHC3,HLA-F,PLSCR1,HLA-E,LTF,NR1H3,TNFSF12,HLX,TLR1,SH2B2,PSEN1,RNF185,E…
GO:BP	cytokine production	GO:0001816	FALSE	3.02E-104	103.52	787	3059	205	78724	CYBA,AGPAT2,NLRC4,LAPTM5,F11R,ELF4,CASP1,LILRA5,TYROBP,NFAM1,TNFRSF1B,TICAM1,EXTL3,FCN1,RIPK3,AKIRIN2,BCL6,ARRB1,NLRP3,IL17RA,SASH3,INPP5D,NDFIP1,HOMER3,RAC1,PGLYRP1,SECTM1,APOA1,CSF1R,TLR7,ACKR1,FRMD8,CEACAM1,HPSE,TLR8,SYK,MAPKAPK2,FCER1G,PRKD2,PYCARD,FGR,TSPO,PCSK5,ORM2,JAK2,C3AR1,TLR5,BTK,IL1B,MMP8,PANX1,BATF,CLEC4E,PRKACA,CARD16,CEBPB,KLF2,APP,CARD8,TNFRSF8,ZBTB45,TLR2,ZCCHC3,HLA-F,HLA-E,LTF,…
GO:BP	positive regulation of intracellular signal transduction	GO:1902533	FALSE	3.26E-104	103.487	1113	3059	241	78724	NCF1,LAMTOR2,SEMA4D,LAPTM5,NACC2,DOK1,SHISA5,F11R,S100A12,TRIM8,RRAGD,CASP1,LILRA5,FLOT2,TICAM1,CTNNB1,NRG1,RXRA,EXTL3,RIPK3,ARRB1,FBXW11,HCLS1,NDFIP1,MAP4K4,RAC1,GPR17,SLC9A1,MAP2K6,VDR,SLC15A3,SECTM1,BMP2,APOA1,CSF1R,TLR7,S100A8,HPSE,TLR8,SYK,KIAA0319,SESN2,RBCK1,PRKD2,RASGEF1A,PYCARD,FGR,JAK2,AKAP5,GNAI2,BTK,IL1B,MAP3K3,SPI1,LGALS1,PDGFRB,PRKACA,CARD16,DOK3,KLF2,APP,SLC46A2,S100A9,SHARPIN,TRIP…
GO:BP	regulation of cytokine production	GO:0001817	FALSE	5.73E-104	103.242	781	3059	204	78724	CYBA,AGPAT2,NLRC4,LAPTM5,F11R,ELF4,CASP1,LILRA5,TYROBP,NFAM1,TNFRSF1B,TICAM1,EXTL3,FCN1,RIPK3,AKIRIN2,BCL6,ARRB1,NLRP3,IL17RA,SASH3,INPP5D,NDFIP1,HOMER3,RAC1,PGLYRP1,SECTM1,APOA1,CSF1R,TLR7,ACKR1,FRMD8,CEACAM1,HPSE,TLR8,SYK,MAPKAPK2,FCER1G,PRKD2,PYCARD,FGR,TSPO,ORM2,JAK2,C3AR1,TLR5,BTK,IL1B,MMP8,PANX1,BATF,CLEC4E,PRKACA,CARD16,CEBPB,KLF2,APP,CARD8,TNFRSF8,ZBTB45,TLR2,ZCCHC3,HLA-F,HLA-E,LTF,QKI,TL…
GO:BP	tissue development	GO:0009888	FALSE	9.24E-103	102.034	2032	3059	324	78724	MAP2K2,AGPAT2,SEMA4D,MAFG,CES1,CTSB,GSK3A,CEBPA,PTEN,F11R,ASCL2,LOXL3,TST,SIPA1,FLOT2,CTNNB1,NRG1,RXRA,EXTL3,DEAF1,MAPK1,ASGR2,RAB13,LAMB3,TFIP11,KLF5,FOSL2,SLC9A1,VDR,ITPK1,SECTM1,BMP2,SEMA4A,TOR1A,CSF1R,WAS,CEACAM1,HPSE,LIPA,MAFB,GRB2,CD151,PRKD2,HMG20B,RAB10,TOLLIP,FGR,JAK2,CCM2,SVIL,BTK,IL1B,MMP8,MEF2A,CTNNBIP1,SPI1,PDGFRB,PRKACA,SAP30,TDRD7,CEBPB,KLF2,SLC24A3,TJP2,SHARPIN,SPINT1,ALOXE3,EGLN1…
GO:BP	negative regulation of biosynthetic process	GO:0009890	FALSE	5.22E-102	101.282	2813	3059	385	78724	SEMA4D,MAFG,LAPTM5,NACC2,GSK3A,CCND3,CEBPA,MIER2,RNASEL,ASCL2,ELF4,LOXL3,UPF1,LILRA5,TYROBP,FLOT2,JDP2,CTNNB1,NRG1,RXRA,WWP2,EXTL3,DEAF1,AKIRIN2,BCL6,ARRB1,TSHZ3,GTPBP1,FBXW11,HCLS1,INPP5D,NDFIP1,RCOR1,GLA,HOMER3,RAC1,SMG5,SRSF4,PLAGL1,KLF5,VDR,PRKCD,PGLYRP1,BMP2,APOA1,CEACAM1,TLR8,OPRD1,GRB10,MAPKAPK2,PARP10,HDAC5,ATF5,MAFB,KLF16,SESN2,NACC1,TDRD9,ANKRD2,NFIL3,PCGF3,BACH1,PYCARD,TSPO,ATXN1L,CREB…
GO:BP	locomotion	GO:0040011	FALSE	2.23E-101	100.653	1255	3059	252	78724	MAP2K2,RIN3,MIIP,SEMA4D,RNASE2,EMILIN2,PTEN,S100A12,ASCL2,GAB1,IFITM1,NRG1,RIPK3,ADORA3,BCL6,IL17RA,MAPK1,HSD3B7,GRN,GLA,MAP4K4,RAC1,RAB13,PRKCD,TMSB10,BMP2,SEMA4A,APOA1,CSF1R,WAS,S100A8,CEACAM1,VAV1,SYK,RHOG,CCRL2,FCER1G,HDAC5,CD151,PRKD2,TNFSF18,MCTP1,FERMT3,PYCARD,FGR,MOSPD2,JAK2,CCL23,C3AR1,RNASE3,GNAI2,IL1B,MAP3K3,PTPN23,BIN2,PDGFRB,SAP30,LSP1,APP,S100A9,CORO1A,PREX1,TRIP6,FUT7,SMPD3,NF2,PLA…
GO:BP	inflammatory response	GO:0006954	FALSE	9.41E-101	100.027	862	3059	210	78724	CYBA,NCF1,NLRC4,CEBPA,F11R,S100A12,ELF4,ZDHHC12,LOXL3,CASP1,LILRA5,TYROBP,NFAM1,TNFRSF1B,MGST2,TICAM1,EXTL3,ADORA3,BCL6,NLRP3,APOL2,IL17RA,NDFIP1,GRN,RAC1,GPR17,CD68,FOSL2,F12,UNC13D,PRKCD,PGLYRP1,BMP2,APOA1,CSF1R,TLR7,ACKR1,S100A8,LTB4R,TLR8,SYK,LIPA,MAPKAPK2,HP,CCRL2,HDAC5,CD163,IL10RB,TOLLIP,PYCARD,FGR,ORM2,JAK2,SERPINA1,CCL23,C3AR1,TLR5,BTK,IL1B,MMP8,CTNNBIP1,LGALS1,CARD16,CEBPB,APP,S100A9,CA…
GO:BP	hemopoiesis	GO:0030097	FALSE	3.09E-100	99.5099	976	3059	222	78724	CEBPA,ASCL2,LOXL3,TYROBP,NFAM1,CTNNB1,TESC,BLVRB,RIPK3,BCL6,JMJD6,NLRP3,SASH3,HCLS1,INPP5D,NDFIP1,RCOR1,CD101,SLC1A5,DNASE2,FOSL2,SMARCD3,PGLYRP1,BMP2,SEMA4A,CSF1R,NCOA6,CEACAM1,VAV1,SYK,LIPA,FCER1G,HDAC5,MAFB,UBASH3B,NFIL3,FLI1,ATXN1L,ALAS1,JAK2,OSCAR,BTK,ATP6AP1,IL1B,CTNNBIP1,SPI1,LGALS1,BATF,CLEC4E,CEBPB,KLF2,APP,SLC46A2,MAEA,PREX1,BRD4,FUT7,SMPD3,LRRK1,TLR2,G6PD,LTF,HLX,QKI,LBR,PINK1,STK4,BAK…
GO:BP	negative regulation of macromolecule biosynthetic process	GO:0010558	FALSE	3.41E-100	99.4674	2745	3059	377	78724	SEMA4D,MAFG,LAPTM5,NACC2,GSK3A,CCND3,CEBPA,MIER2,RNASEL,ASCL2,ELF4,LOXL3,UPF1,LILRA5,TYROBP,FLOT2,JDP2,CTNNB1,NRG1,RXRA,WWP2,EXTL3,DEAF1,AKIRIN2,BCL6,ARRB1,TSHZ3,GTPBP1,FBXW11,HCLS1,INPP5D,NDFIP1,RCOR1,HOMER3,RAC1,SMG5,SRSF4,PLAGL1,KLF5,VDR,PRKCD,PGLYRP1,BMP2,APOA1,CEACAM1,TLR8,OPRD1,GRB10,MAPKAPK2,PARP10,HDAC5,ATF5,MAFB,KLF16,SESN2,NACC1,TDRD9,ANKRD2,NFIL3,PCGF3,BACH1,PYCARD,TSPO,ATXN1L,CREBBP,B…
GO:BP	positive regulation of gene expression	GO:0010628	FALSE	6.25E-100	99.2042	1212	3059	246	78724	CYBA,MAP2K2,AGPAT2,MAFG,NLRC4,LAPTM5,GSK3A,CEBPA,CASP1,UPF1,LILRA5,TYROBP,NFAM1,TICAM1,CTNNB1,TESC,FCN1,AKIRIN2,NLRP3,IL17RA,SASH3,F12,VDR,SECTM1,BMP2,CSF1R,TLR7,FRMD8,HPSE,TLR8,SYK,MAPKAPK2,FCER1G,NFIL3,PRKD2,PYCARD,FGR,ORM2,JAK2,SRPK2,C3AR1,TLR5,BTK,IL1B,MMP8,MEF2A,PANX1,SPI1,BATF,PRDX6,CLEC4E,CEBPB,APP,SLC24A3,CARD8,TNFRSF8,TLR2,ZCCHC3,HLA-F,PLSCR1,HLA-E,TNFSF12,SMAD1,QKI,PINK1,TLR1,PADI2,PSEN…
GO:BP	cellular response to oxygen-containing compound	GO:1901701	FALSE	4.36E-99	98.3605	1182	3059	242	78724	NCF1,TWF2,CTSD,CES1,AGTRAP,GSK3A,RRAGD,CASP1,UPF1,TYROBP,GAB1,SIPA1,TNFRSF1B,TICAM1,CTNNB1,MGST1,RXRA,TESC,BLVRB,RIPK3,GNA15,NLRP3,MAPK1,MAP4K4,PDK3,RAB13,CD68,SLC9A1,CAMP,MAP2K6,VDR,PRKCD,AKR1A1,C2CD2L,CEACAM1,YWHAG,PTPRE,SYK,GRB10,HDAC5,GRB2,KLF16,SESN2,RAB10,PYCARD,TSPO,PXN,JAK2,HADHB,TLR5,GNAI2,BTK,IL1B,MMP8,PRKACA,CARD16,KLF2,APP,CARD8,ZNF592,FUT7,SMPD3,CAMKK2,TLR2,LY86,RUVBL2,PRDX1,SHC1,SLC…
GO:BP	endocytosis	GO:0006897	FALSE	9.66E-99	98.0151	709	3059	190	78724	CYBA,RIN3,RAB5C,DENND1A,TYROBP,DYSF,NRG1,TOM1,FCN1,RAB7A,ARRB1,RNASEK,CD63,JMJD6,MAPK1,REPS2,RAC1,ASGR2,BTBD9,UNC13D,PRKCD,APOA1,TOR1A,CEACAM1,VAV1,SYK,RHOG,LIPA,MAPKAPK2,ITSN1,CEACAM4,FCER1G,ANKRD13D,GRB2,AP2S1,CD151,MCTP1,CFP,EPN1,ATG3,PYCARD,FGR,SORT1,BTK,SYP,BIN2,NEURL3,CLTA,APP,CORO1A,IGF2R,TBC1D2B,TLR2,ARF1,EHD4,PLSCR1,NR1H3,PDLIM7,MYO1F,FKBP15,FOLR1,ACTG1,CYTH2,ELMO2,LRP10,VAV3,LRPAP1,CLN3…
GO:BP	neurogenesis	GO:0022008	FALSE	6.69E-98	97.1747	1771	3059	295	78724	MAP2K2,SEMA4D,TWF2,GSK3A,B4GALT5,NDUFS2,PTEN,DYNLT1,ANKS1A,ASCL2,MARK2,TNFRSF1B,CTNNB1,FKBP4,BCL6,KIAA0319L,MAPK1,GRN,DBN1,GLA,MAP4K4,SCLT1,GFRA3,EFNA4,RAC1,MAP1S,RAB13,GPR17,CDKN2C,DIP2B,SMARCD3,BMP2,SEMA4A,TOR1A,CSF1R,UQCRQ,S100A8,YWHAG,GBA2,KIAA0319,RHOG,LYPLA2,HDAC5,ATF5,GRB2,IST1,HMG20B,RAB10,TSPO,NUMBL,JAK2,EFHD1,IL1B,FBXO45,MEF2A,SIPA1L1,CEBPB,APP,IER2,S100A9,SPINT1,PREX1,DGKG,STYXL1,OLIG1…
GO:BP	lymphocyte activation	GO:0046649	FALSE	1.64E-96	95.7854	814	3059	200	78724	LAPTM5,CCND3,ASCL2,ELF4,LOXL3,TYROBP,NFAM1,TNFRSF1B,FLOT2,TICAM1,CTNNB1,RIPK3,AKIRIN2,BCL6,JMJD6,NLRP3,LCP1,SASH3,INPP5D,NDFIP1,FOSL2,UNC13D,SMARCD3,PRKCD,PGLYRP1,SEMA4A,WAS,LAMP1,CEACAM1,YWHAG,VAV1,SYK,LIPA,FCER1G,HDAC5,MAFB,GRB2,NFIL3,CD151,TNFSF18,PYCARD,FGR,JAK2,SNX27,BTK,IL1B,SPI1,LGALS1,BATF,CLEC4E,CEBPB,SLC46A2,CORO1A,PREX1,BRD4,APBB1IP,FUT7,MSH6,PRDX1,TBC1D10C,HLA-F,HLA-E,TNFSF12,HLX,KIF1…
GO:BP	protein phosphorylation	GO:0006468	FALSE	1.30E-94	93.8848	1227	3059	241	78724	MAP2K2,NCF1,SEMA4D,GSK3A,CCND3,LMTK2,PTEN,RNASEL,S100A12,MARK2,NEK4,LILRA5,AATK,MAST3,NRG1,MVP,SERTAD1,RIPK3,ARRB1,MAPK1,HCLS1,MAP4K4,PDK3,SRPK1,RAC1,CDKN2C,MAP2K6,PRKCD,MAP3K6,BMP2,APOA1,CSF1R,TLR7,CEACAM1,YWHAG,TLR8,GRK6,SYK,OPRD1,ERG,MAPKAPK2,SESN2,PRKD2,TNFSF18,PYCARD,FGR,JAK2,SRPK2,BTK,IL1B,MAP3K3,CLK3,PDGFRB,PRKACA,PPP1R15B,APP,ZNF592,SMPD3,LRRK1,NF2,CAMKK2,PPP4R1,TLR2,PHKG1,PLAUR,EHD4,SLC8…
GO:BP	cell cycle	GO:0007049	FALSE	1.56E-94	93.8063	1663	3059	281	78724	MIIP,ARL8A,KLHDC8B,NSFL1C,CCND3,CEBPA,PTEN,DYNLT1,ANAPC11,NEK4,UBE2S,UPF1,SIPA1,EXOC3,CTNNB1,BCL6,FBXO6,RAD23A,FBXW11,SRPK1,MAP1S,GNB1L,CDKN2C,PLAGL1,MAP2K6,SMARCD3,CETN2,NUP214,BMP2,CLIP1,AURKAIP1,LIPA,REEP4,ATF5,TDRD9,IST1,SRPK2,MTMR3,SVIL,IL1B,CHMP4B,CHMP2A,PDGFRB,ARL2,PRKACA,PSME1,HAUS4,APP,PSMD13,PHF13,CENPK,CHMP1A,MAEA,BRD4,NAA60,SMPD3,NF2,MSH6,RUVBL2,UBXN2B,ARF1,VPS4B,NUSAP1,PLSCR1,JTB,RMI…
GO:BP	transmembrane transport	GO:0055085	FALSE	3.65E-94	93.438	1578	3059	273	78724	ANO10,CYBA,NDUFB1,TRPC6,CACNA1E,HK2,GSK3A,NDUFS2,SLC16A3,TMEM63B,RNASEL,TST,MFSD9,TCN2,CLCN4,WWP2,TIMM17B,ATP6V0E1,TESC,SLC35A2,OAZ2,DIAPH1,RNASEK,CD63,SLCO4C1,TMEM120A,SLC36A1,ATP6V0A1,TAP1,SLC1A5,APOL1,SLC34A3,CTSS,SLC9A1,UQCR10,VDR,SLC15A3,NDUFB4,HPSE,GRB10,ORAI3,UBASH3B,SESN2,SLC7A7,ASPH,NDUFA1,SORT1,SLC2A1,GHITM,AKAP5,ATP6AP1,IL1B,MEF2A,ATP6V1E1,PANX1,GNB2,SLC22A15,PRKACA,SLC43A2,SLC31A2,SLC…
GO:BP	protein catabolic process	GO:0030163	FALSE	1.61E-93	92.7943	1030	3059	220	78724	VPS37B,CTSD,CTSB,LAPTM5,GSK3A,NSFL1C,CEBPA,PTEN,ANAPC11,UBE2S,KLHL8,TNFRSF1B,OS9,CTNNB1,RNF111,WWP2,OAZ2,TSPAN17,AKIRIN2,RAB7A,ARRB1,ARRDC1,FBXO6,IL17RA,RAD23A,FBXW11,NDFIP1,DCAF11,CTSS,FBXO27,MANBA,TOR1A,TIMP2,CEACAM1,HPSE,UBA52,HERPUD1,RNF144B,LIPA,BANP,LYPLA2,VPS37C,DNAJB12,RBCK1,TOLLIP,HMGCR,MAN1A1,BTK,IL1B,CHMP4B,FBXO45,CHMP2A,GNS,PTPN23,PRKACA,PSME1,PSMD13,SHARPIN,CHMP1A,MAEA,KCTD5,PDLIM2,C…
GO:BP	positive regulation of response to external stimulus	GO:0032103	FALSE	5.27E-93	92.2785	642	3059	176	78724	CYBA,NLRC4,EMILIN2,CEBPA,S100A12,ZDHHC12,CASP1,LILRA5,TYROBP,MGST2,TICAM1,FCN1,AKIRIN2,NLRP3,IL17RA,MAPK1,GRN,RAC1,SMPDL3A,CTSS,MAP2K6,SLC15A3,CSF1R,TLR7,LAMP1,S100A8,VAV1,TLR8,SYK,MAPKAPK2,ECSIT,PRKD2,PYCARD,CREBBP,MOSPD2,C3AR1,TLR5,BTK,IL1B,MMP8,SPI1,LGALS1,PDGFRB,PVR,CLEC4E,CEBPB,APP,SLC46A2,S100A9,CARD8,TLR2,LY86,ZCCHC3,HLA-F,PLSCR1,HLA-E,LTF,NR1H3,TLR1,RNF185,EIF2AK2,IRF1,PARP9,CXCL14,IRAK3,…
GO:BP	positive regulation of cellular component organization	GO:0051130	FALSE	1.13E-89	88.9471	1105	3059	223	78724	CYBA,MAP2K2,SEMA4D,TWF2,GSK3A,ANAPC11,MARK2,ARAP1,TYROBP,ARPC2,CTNNB1,NRG1,TOM1,FCN1,CDC42EP4,ARRB1,CD63,WIPI1,LCP1,CD53,MAPK1,GRN,DBN1,MAP4K4,RAC1,BMP2,SEMA4A,APOA1,CLSTN1,TOR1A,SYK,RAB3GAP2,CLIP1,FCER1G,GRB2,IST1,CD151,CFP,PYCARD,PXN,BTK,IL1B,PTPN23,PDGFRB,ARL2,APP,S100A9,STYXL1,SMPD3,NF2,TMEM30A,RUVBL2,PLAUR,VPS4B,NUSAP1,CYFIP1,ARSB,PINK1,SPAST,BAK1,PSEN1,CUX1,MIEN1,PPP1R10,FSCN1,INO80C,RB1,CL…
GO:BP	response to endogenous stimulus	GO:0009719	FALSE	1.25E-89	88.9028	1489	3059	259	78724	TWF2,CTSD,CES1,AGTRAP,CTSB,GSK3A,GAB1,TNFRSF1B,RETN,TICAM1,HTRA3,CTNNB1,RNF111,RXRA,FKBP4,BLVRB,CD63,MAPK1,HCLS1,RAB13,CD68,CTSS,SRSF4,FOSL2,SLC9A1,VDR,PRKCD,BMP2,TIMP2,NCOA6,CEACAM1,YWHAG,PTPRE,SYK,OPRD1,GRB10,MAPKAPK2,FCER1G,HDAC5,GRB2,SESN2,PRKD2,RAB10,TSPO,SORT1,PXN,SLC2A1,CREBBP,JAK2,GNAI2,IL1B,ACAP2,PDGFRB,POR,PRKACA,SAP30,KLF2,IER2,CORO1A,SPINT1,ZNF592,FUT7,SMPD3,TLR2,SHC1,SAP30L,EHD4,ESRR…
GO:BP	cytoskeleton organization	GO:0007010	FALSE	1.80E-88	87.7453	1529	3059	261	78724	TWF2,GSK3A,NSFL1C,LRRC61,PTEN,DYNLT1,F11R,CAPG,MARK2,ARAP1,TYROBP,SIPA1,ARPC2,MAST3,CTNNB1,FKBP4,DIAPH1,BCL6,CDC42EP4,ARRB1,ARHGAP26,FLII,PSTPIP2,LCP1,FBXW11,MAPK1,HCLS1,MSRB2,DBN1,RAC1,MAP1S,RAB13,SLC9A1,PRKCD,CETN2,TMSB10,APOA1,TOR1A,CSF1R,WAS,S100A8,GBA2,CLIP1,RHOG,ATF5,GRB2,AGFG1,PYCARD,PXN,JAK2,SVIL,CHMP4B,MEF2A,CHMP2A,FGD3,CCDC13,PDGFRB,SIPA1L1,ARL2,HAUS4,S100A9,CORO1A,CHMP1A,MAEA,PREX1,PDL…
GO:BP	regulation of catabolic process	GO:0009894	FALSE	2.01E-88	87.6977	1040	3059	215	78724	LAPTM5,GSK3A,CEBPA,PTEN,RNASEL,TFEB,TRIM8,RRAGD,UPF1,TNFRSF1B,TICAM1,QSOX1,ATP6V0E1,TOM1,OAZ2,TSPAN17,RAB7A,WIPI1,GTPBP1,VPS26B,RAD23A,NDFIP1,ATP6V0A1,SLIRP,DRAM1,PRKCD,TIMP2,TBC1D14,RAB3GAP2,HERPUD1,MAPKAPK2,HP,BANP,PPP1R3D,SESN2,PYCARD,TSPO,HMGCR,MTMR3,IL1B,CHMP4B,ATP6V1E1,CISD1,ARL2,PRKACA,PSME1,APP,EGLN1,CCDC22,CAMKK2,CTSA,TNFSF12,NMNAT1,PSAP,QRICH2,FBXL5,QKI,PINK1,OAZ1,PSME2,PSMD2,TRAF7,PSEN…
GO:BP	negative regulation of multicellular organismal process	GO:0051241	FALSE	7.59E-88	87.1197	1087	3059	219	78724	LAPTM5,GSK3A,CEBPA,PTEN,DYNLT1,ASCL2,ELF4,LOXL3,LILRA5,TYROBP,TNFRSF1B,RETN,CTNNB1,EXTL3,BCL6,ARRB1,INPP5D,NDFIP1,GRN,HOMER3,RAC1,DIP2B,F12,MAP2K6,PRKCD,PGLYRP1,BMP2,SEMA4A,APOA1,CEACAM1,TLR8,KIAA0319,MAFB,UBASH3B,EPN1,PYCARD,FGR,TSPO,HMGCR,BTK,IL1B,SPI1,LGALS1,PTPN23,PRKACA,SAP30,CARD16,CEBPB,KLF2,CARD8,NF2,TLR2,PLAUR,TBC1D10C,SHC1,SAP30L,HLA-F,HLA-E,G6PD,LTF,NR1H3,KREMEN1,HLX,QKI,STK4,ANXA4,PSE…
GO:BP	activation of immune response	GO:0002253	FALSE	3.08E-86	85.5112	560	3059	159	78724	CYBA,NLRC4,LAPTM5,ZDHHC12,CASP1,TYROBP,NFAM1,TICAM1,FCN1,NLRP3,MAPK1,INPP5D,SMPDL3A,CTSS,FOSL2,MAP2K6,PRKCD,SLC15A3,TLR7,CR1L,S100A8,CEACAM1,VAV1,TLR8,SYK,LIPA,MAPKAPK2,FCER1G,GRB2,ECSIT,RBCK1,PRKD2,CFP,PYCARD,FGR,CREBBP,C3AR1,TLR5,BTK,IL1B,CLEC4E,SLC46A2,S100A9,CARD8,TLR2,ZCCHC3,PLSCR1,LTF,NR1H3,TLR1,SH2B2,PSEN1,EIF2AK2,IRF1,PRAM1,VAV3,IRAK3,C1RL,PTPN6,SLC19A1,ZDHHC3,RTN4,GBP1,CD274,TRAF6,SLC15A…
GO:BP	positive regulation of developmental process	GO:0051094	FALSE	5.31E-86	85.2749	1343	3059	241	78724	MAP2K2,SEMA4D,TWF2,HK2,B4GALT5,EMILIN2,CEBPA,F11R,TYROBP,GAB1,IFITM1,TNFRSF1B,RETN,CTNNB1,NRG1,RXRA,TESC,BCL6,NLRP3,CD53,SASH3,HCLS1,INPP5D,GRN,RCOR1,CD101,DBN1,KLF5,ATP11A,CAMP,VDR,SMARCD3,BMP2,SEMA4A,CLSTN1,CEACAM1,HPSE,SYK,IST1,PRKD2,HMG20B,TSPO,NUMBL,JAK2,C3AR1,BTK,IL1B,CTNNBIP1,SPI1,SAP30,PA2G4,CEBPB,SPINT1,BRD4,NF2,TLR2,SAP30L,SLC8A1,ESRRB,LTF,CYFIP1,TNFSF12,MAP3K5,HLX,SMAD1,QKI,PINK1,STK4,…
GO:BP	response to nitrogen compound	GO:1901698	FALSE	5.98E-86	85.2236	1080	3059	216	78724	CTSD,CES1,AGTRAP,GSK3A,RRAGD,TYROBP,GAB1,RETN,OS9,TICAM1,CTNNB1,BLVRB,DIAPH1,GNA15,FBXO6,NLRP3,MAPK1,RAB13,CD68,SRSF4,FBXO27,FOSL2,SLC9A1,CAMP,PRKCD,TOR1A,TLR7,CEACAM1,YWHAG,PTPRE,SYK,HERPUD1,GRB10,LIPA,FCER1G,HDAC5,GRB2,DNAJB12,KLF16,SESN2,ASPH,RAB10,TSPO,SORT1,PXN,SLC2A1,JAK2,MAN1A1,GNAI2,IL1B,PANX1,PRKACA,KLF2,APP,MTARC1,FKBP5,ZNF592,FUT7,EGLN1,SMPD3,TLR2,ZCCHC3,SHC1,SLC8A1,CYFIP1,STXBP3,MAP3K…
GO:BP	immune response-regulating signaling pathway	GO:0002764	FALSE	8.78E-86	85.0565	540	3059	156	78724	CYBA,NLRC4,LAPTM5,ZDHHC12,CASP1,LILRA5,TYROBP,LILRA6,NFAM1,TICAM1,FCN1,NLRP3,MAPK1,INPP5D,SMPDL3A,CTSS,FOSL2,MAP2K6,PRKCD,SLC15A3,TLR7,S100A8,CEACAM1,VAV1,TLR8,SYK,LIPA,MAPKAPK2,FCER1G,GRB2,ECSIT,RBCK1,PRKD2,PYCARD,FGR,CREBBP,OSCAR,C3AR1,TLR5,BTK,CLEC4E,SLC46A2,S100A9,CARD8,TLR2,ZCCHC3,PLSCR1,LTF,NR1H3,TLR1,SH2B2,PSEN1,EIF2AK2,IRF1,PRAM1,VAV3,IRAK3,PTPN6,SLC19A1,ZDHHC3,RTN4,GBP1,CD274,TRAF6,SLC15…
GO:BP	monoatomic ion transport	GO:0006811	FALSE	6.17E-85	84.2095	1282	3059	234	78724	ANO10,CYBA,NDUFB1,TRPC6,CACNA1E,NDUFS2,LMTK2,TMEM63B,LILRA5,TCN2,CLCN4,CTNNB1,FKBP4,WWP2,ATP6V0E1,TESC,DIAPH1,RNASEK,CD63,SLCO4C1,TMEM120A,SLC36A1,CRACR2B,NDFIP1,ATP6V0A1,HOMER3,APOL1,SLC34A3,CTSS,SLC9A1,UQCR10,VDR,SLC15A3,NDUFB4,ARHGAP1,OPRD1,ORAI3,UBASH3B,ASPH,NDUFA1,TSPO,GHITM,AKAP5,GNAI2,ATP6AP1,ATP6V1E1,PANX1,GNB2,SLC22A15,PDGFRB,LCN2,PRKACA,SLC31A2,SLC25A22,SLC24A3,CORO1A,SLC12A9,VPS4B,SLC4…
GO:BP	anatomical structure formation involved in morphogenesis	GO:0048646	FALSE	9.39E-85	84.0275	1199	3059	226	78724	MAP2K2,HK2,EMILIN2,TYROBP,GAB1,CTNNB1,DEAF1,BCL6,JMJD6,FLII,CD53,MAPK1,RELT,GRN,LAMB3,KLF5,TNFRSF12A,CAMP,UNC13D,SMARCD3,BMP2,SEMA4A,CEACAM1,HPSE,SYK,HDAC5,MAFB,GRB2,AGFG1,PRKD2,EPN1,SRPK2,CCM2,C3AR1,IL1B,MMP8,MEF2A,MAP3K3,PDGFRB,PRKACA,KLF2,HIF3A,SPINT1,EGLN1,SMPD3,NF2,TLR2,SHC1,TGFBI,VPS4B,MFN2,TNFSF12,COL8A2,SMAD1,FOLR1,QKI,STK4,PSEN1,ACTG1,ANG,FIG4,MBOAT7,ACTN1,VAV3,STK3,HS6ST1,AAMP,PTPN6,INH…
GO:BP	immune effector process	GO:0002252	FALSE	9.98E-85	84.001	732	3059	178	78724	NCF1,LAPTM5,ASCL2,LOXL3,TYROBP,DYSF,TNFRSF1B,TICAM1,FCN1,RIPK3,BCL6,NLRP3,LCP1,SASH3,INPP5D,NDFIP1,GRN,UNC13D,PRKCD,PGLYRP1,SECTM1,SEMA4A,APOA1,TLR7,WAS,LAMP1,CR1L,CEACAM1,YWHAG,VAV1,TLR8,SYK,STXBP2,LIPA,MAPKAPK2,FCER1G,GRB2,TNFSF18,CFP,PYCARD,FGR,PLEKHM2,BTK,IL1B,PANX1,SPI1,LGALS1,BATF,PVR,CLEC4E,APP,S100A9,CORO1A,BRD4,APBB1IP,FUT7,MSH6,PRDX1,HLA-F,HLA-E,STXBP3,TNFSF12,HLX,PSEN1,JAK3,PRAM1,VAV3,…
GO:BP	positive regulation of molecular function	GO:0044093	FALSE	3.26E-84	83.4873	884	3059	194	78724	MAP2K2,NCF1,SEMA4D,NLRC4,TRPC6,GSK3A,CCND3,PTEN,S100A12,MARK2,ARAP1,UBE2S,TRIM8,LILRA5,PSENEN,NRG1,RXRA,TESC,RIPK3,ADORA3,RFC2,GRN,MAP4K4,CTSS,SLC9A1,VDR,PRKCD,RALGAPA2,BMP2,APOA1,CSF1R,TBC1D2,S100A8,OPRD1,RHOG,HDAC5,RBCK1,PRKD2,ASPH,TNFSF18,PYCARD,JAK2,AKAP5,BTK,IL1B,PDGFRB,SIPA1L1,POR,CARD16,S100A9,YWHAB,TLR2,MSH6,PLAUR,PLSCR1,LTF,NR1H3,JTB,PSAP,MAP3K5,PIK3R5,PINK1,ATP1B3,APH1B,EIF2AK2,PARP9,DT…
GO:BP	regulation of catalytic activity	GO:0050790	FALSE	5.19E-82	81.2846	928	3059	196	78724	MAP2K2,NCF1,SEMA4D,CTSB,GSK3A,CCND3,PTEN,S100A12,MARK2,ARAP1,TBC1D10B,UBE2S,LILRA5,PSENEN,NRG1,MVP,SERTAD1,RIPK3,ADORA3,RFC2,GRN,GLA,MAP4K4,CDKN2C,VDR,PRKCD,RALGAPA2,BMP2,APOA1,CSF1R,TBC1D2,TIMP2,CEACAM1,YWHAG,VAV1,RAB3GAP2,RHOG,HP,ECSIT,PYCARD,FGR,SORT1,JAK2,AKAP5,GNAI2,IL1B,SERPINB8,FGD3,PDGFRB,SIPA1L1,POR,ARL2,YWHAB,EGLN1,CAMKK2,MSH6,PLSCR1,SLC8A1,LTF,NR1H3,JTB,PSAP,MAP3K5,PIK3R5,PINK1,PSEN1,A…
GO:BP	response to abiotic stimulus	GO:0009628	FALSE	9.08E-82	81.0421	1144	3059	217	78724	AGTRAP,HK2,NDUFS2,PTEN,F11R,ASCL2,CASP1,SIPA1,RETN,CTNNB1,TMEM120A,PDK3,CTSS,FOSL2,SLC9A1,PRKCD,BMP2,TLR7,TLR8,KIAA0319,OPRD1,LIPA,MAPKAPK2,POLR2A,GRB2,PYCARD,TSPO,SLC2A1,CREBBP,HMGCR,TLR5,EFHD1,ATP6AP1,IL1B,PRKACA,APP,HIF3A,TNFRSF8,EGLN1,TLR2,MSH6,RUVBL2,SLC8A1,CYFIP1,ARSB,PINK1,BAK1,ANG,SLC38A2,IRF1,CLN3,CPEB4,ACADVL,RGS14,NDRG1,INHBA,RTN4,HSPB1,ATP6V0D1,MYD88,APAF1,RAD9A,MAPK14,KCNJ2,BRCA1,BRA…
GO:BP	immune response-activating signaling pathway	GO:0002757	FALSE	1.26E-81	80.8992	494	3059	146	78724	CYBA,NLRC4,LAPTM5,ZDHHC12,CASP1,TYROBP,NFAM1,TICAM1,FCN1,NLRP3,MAPK1,INPP5D,SMPDL3A,CTSS,FOSL2,MAP2K6,PRKCD,SLC15A3,TLR7,S100A8,CEACAM1,VAV1,TLR8,SYK,LIPA,MAPKAPK2,FCER1G,GRB2,ECSIT,RBCK1,PRKD2,PYCARD,FGR,CREBBP,C3AR1,TLR5,BTK,CLEC4E,SLC46A2,S100A9,CARD8,TLR2,ZCCHC3,PLSCR1,LTF,NR1H3,TLR1,SH2B2,PSEN1,EIF2AK2,IRF1,PRAM1,VAV3,IRAK3,PTPN6,SLC19A1,ZDHHC3,RTN4,GBP1,CD274,TRAF6,SLC15A4,TRIM25,MYD88,CSK,…
GO:BP	regulation of locomotion	GO:0040012	FALSE	2.71E-81	80.5667	1067	3059	209	78724	MAP2K2,RIN3,MIIP,SEMA4D,EMILIN2,PTEN,ASCL2,GAB1,IFITM1,RIPK3,ADORA3,BCL6,MAPK1,GRN,GLA,MAP4K4,RAC1,TMSB10,BMP2,SEMA4A,CSF1R,WAS,CEACAM1,HDAC5,CD151,PRKD2,TNFSF18,MCTP1,FERMT3,PYCARD,FGR,MOSPD2,JAK2,CCL23,C3AR1,GNAI2,IL1B,MAP3K3,PTPN23,PDGFRB,SAP30,APP,CORO1A,PREX1,TRIP6,FUT7,SMPD3,NF2,SAP30L,ARSB,STK4,PADI2,ACTG1,MIEN1,CXCL14,CLN3,AAMP,IRS2,RTN4,MYADM,CD274,SPHK1,DOCK4,HSPB1,MYD88,RAC2,SRGAP2,C5A…
GO:BP	regulation of protein modification process	GO:0031399	FALSE	4.28E-81	80.3686	1049	3059	207	78724	MAP2K2,NCF1,SEMA4D,LAPTM5,GSK3A,CCND3,PTEN,S100A12,MARK2,UBE2S,LILRA5,TICAM1,CTNNB1,NRG1,RNF111,MVP,SERTAD1,RIPK3,ARRB1,MAPK1,HCLS1,NDFIP1,RAC1,CDKN2C,DIP2B,PRKCD,BMP2,APOA1,CSF1R,TLR7,CEACAM1,YWHAG,TLR8,SYK,RAB3GAP2,OPRD1,HERPUD1,PARP10,SESN2,HMG20B,TNFSF18,TOLLIP,PYCARD,FGR,TSPO,JAK2,IL1B,PDGFRB,PPP1R15B,APP,ZNF592,SMPD3,LRRK1,NF2,CAMKK2,PTTG1IP,PLAUR,EHD4,G6PD,SLC8A1,LTF,JTB,MAP3K5,PIK3R5,PINK…
GO:BP	regulation of organelle organization	GO:0033043	FALSE	1.11E-80	79.9548	1148	3059	216	78724	MAP2K2,TWF2,GSK3A,F11R,ANAPC11,CAPG,MARK2,ARAP1,UPF1,ARPC2,CTNNB1,FKBP4,TOM1,DIAPH1,RAB7A,CDC42EP4,WIPI1,FLII,LCP1,MAPK1,HCLS1,GRN,RAC1,MAP1S,SMG5,LRFN1,SLC9A1,SMARCD3,PRKCD,APOA1,CSF1R,WAS,S100A8,TBC1D14,GBA2,RAB3GAP2,CLIP1,AURKAIP1,RHOG,GRB2,ATG3,PYCARD,PXN,MTMR3,GHITM,SVIL,IL1B,CHMP4B,CHMP2A,PDGFRB,ARL2,HAUS4,S100A9,CORO1A,CHMP1A,PREX1,STYXL1,SMPD3,NF2,RUVBL2,PLAUR,ARF1,ARF4,VPS4B,NUSAP1,CYFIP…
GO:BP	regulation of cell development	GO:0060284	FALSE	1.18E-80	79.9268	847	3059	186	78724	MAP2K2,SEMA4D,TWF2,GSK3A,CEBPA,PTEN,DYNLT1,F11R,ASCL2,LOXL3,TYROBP,NFAM1,TNFRSF1B,CTNNB1,TESC,BCL6,NLRP3,SASH3,HCLS1,INPP5D,NDFIP1,GRN,RCOR1,CD101,DBN1,DIP2B,SMARCD3,PGLYRP1,BMP2,CEACAM1,SYK,KIAA0319,MAFB,UBASH3B,IST1,TSPO,NUMBL,BTK,IL1B,CTNNBIP1,SPI1,LGALS1,BATF,CEBPB,SLC46A2,SPINT1,BRD4,NF2,TLR2,LTF,CYFIP1,HLX,QKI,PSEN1,CUX1,IRF1,JAK3,RB1,PTPN6,KDM4A,RGS14,INHBA,PAF1,RTN4,CTDSP1,FGL2,CTR9,EIF6,…
GO:BP	cytokine-mediated signaling pathway	GO:0019221	FALSE	1.75E-79	78.7563	518	3059	147	78724	AGPAT2,LAPTM5,DOK1,CEBPA,CASP1,LILRA5,LILRA6,IFITM1,TNFRSF1B,IL17RA,HCLS1,GPR17,IL13RA1,APOA1,CSF1R,ACKR1,CEACAM1,SYK,MAPKAPK2,CCRL2,FCER1G,TNFSF18,IL10RB,TOLLIP,PYCARD,NUMBL,JAK2,CCL23,IL1B,MMP8,SPI1,IFITM2,PRKACA,CARD16,CARD8,SHARPIN,CSF2RA,EIF4E2,NR1H3,IFNAR1,PADI2,SH2B2,RNF185,GPR35,IRF1,PARP9,JAK3,IRAK3,PTPN6,TYK2,INHBA,IFNK,CTR9,SPHK1,TRAF6,TBKBP1,MYD88,IFNGR2,AGPAT1,MFAP3,CXCL1,CD300LF,CMK…
GO:BP	response to lipid	GO:0033993	FALSE	2.58E-79	78.5877	930	3059	193	78724	NCF1,TWF2,CES1,GSK3A,CASP1,UPF1,TNFRSF1B,MGST2,TICAM1,CTNNB1,MGST1,RXRA,FKBP4,TESC,AKIRIN2,NLRP3,MAPK1,PDK3,CD68,FOSL2,CAMP,VDR,PRKCD,S100A8,SYK,LIPA,MAPKAPK2,HDAC5,PYCARD,TSPO,ALAS1,JAK2,TBXAS1,HADHB,TLR5,BTK,IL1B,MMP8,CARD16,CEBPB,S100A9,CARD8,IGF2R,TLR2,LY86,RUVBL2,VPS4B,ESRRB,LTF,NR1H3,ACSBG1,SLPI,IFNAR1,DEFA4,GNB1,PADI2,NFKBIB,DHH,SAFB,SLC10A3,BPI,IRAK3,INHBA,PAF1,CTR9,CD274,TRAF6,TRIM25,MYD…
GO:BP	regulation of response to biotic stimulus	GO:0002831	FALSE	1.02E-78	77.9901	540	3059	149	78724	CYBA,NCF1,NLRC4,EMILIN2,ZDHHC12,CASP1,TYROBP,TICAM1,FCN1,AKIRIN2,NLRP3,GRN,SMPDL3A,CTSS,MAP2K6,SLC15A3,TLR7,LAMP1,S100A8,CEACAM1,YWHAG,VAV1,TLR8,SYK,MAPKAPK2,ECSIT,PYCARD,FGR,CREBBP,TLR5,BTK,IL1B,SPI1,PVR,CLEC4E,CARD16,SLC46A2,S100A9,CARD8,TRAFD1,NT5C2,EIF4E2,TLR2,LY86,ZCCHC3,HLA-F,PLSCR1,HLA-E,LTF,NR1H3,TLR1,RNF185,EIF2AK2,IRF1,PARP9,CEP63,DTX3L,IRAK3,PTPN6,SLC19A1,ZDHHC3,RTN4,IFNK,FGL2,CD274,TR…
GO:BP	regulation of cell motility	GO:2000145	FALSE	2.26E-78	77.6466	1022	3059	201	78724	MAP2K2,RIN3,MIIP,SEMA4D,EMILIN2,PTEN,ASCL2,GAB1,IFITM1,RIPK3,ADORA3,BCL6,MAPK1,GRN,MAP4K4,RAC1,TMSB10,BMP2,SEMA4A,CSF1R,WAS,CEACAM1,HDAC5,CD151,PRKD2,TNFSF18,MCTP1,FERMT3,PYCARD,FGR,MOSPD2,JAK2,CCL23,C3AR1,GNAI2,IL1B,MAP3K3,PTPN23,PDGFRB,SAP30,APP,CORO1A,PREX1,TRIP6,FUT7,SMPD3,NF2,SAP30L,ARSB,STK4,PADI2,ACTG1,MIEN1,CXCL14,CLN3,AAMP,IRS2,RTN4,MYADM,CD274,SPHK1,DOCK4,HSPB1,MYD88,RAC2,SRGAP2,C5AR1,C…
GO:BP	positive regulation of transcription by RNA polymerase II	GO:0045944	FALSE	2.34E-78	77.6302	1256	3059	223	78724	MAFG,GSK3A,MTF1,CEBPA,RNASEL,ASCL2,ELF4,TFEB,CTNNB1,RXRA,SERTAD1,WWP2,MED16,AKIRIN2,ARRB1,JMJD6,NLRP3,HCLS1,PLAGL1,KLF5,FOSL2,SLC9A1,VDR,BMP2,TLR7,WAS,NCOA6,ZNF319,ERG,ARID3B,HDAC5,ATF5,MAFB,PRKD2,FLI1,BACH1,CREBBP,JAK2,IL1B,MEF2A,SPI1,MLXIP,BATF,NR6A1,CEBPB,KLF2,APP,IER2,BRD4,EGLN1,OLIG1,TLR2,RUVBL2,ARF4,ZGLP1,PLSCR1,ESRRB,NR1H3,SMAD1,IRF1,RB1,INHBA,PAF1,CEBPD,CTR9,TRAF6,MYD88,DDIT3,TBL1X,MAPK14…
GO:BP	secretion	GO:0046903	FALSE	2.51E-78	77.6002	992	3059	198	78724	CYBA,CES1,HK2,COPA,SYNGR1,AP1B1,TMEM63B,DYSF,EXOC3,TNFRSF1B,RETN,NRG1,RPH3AL,ADORA3,RAB7A,DNAJC5,HRH2,MAP4K4,RAB13,SLC1A5,FOSL2,MAP2K6,UNC13D,VDR,BMP2,C2CD2L,LAMP1,S100A8,CEACAM1,SYK,STXBP2,ITSN1,MCTP1,RAB10,FGR,TSPO,PCSK5,JAK2,SNAP29,HMGCR,GNAI2,BTK,IL1B,FBXO45,CHMP2A,SYP,SPI1,PTPN23,SYTL3,PRKACA,SLC25A22,CORO1A,SMPD3,TLR2,VPS4B,SLC4A8,HLA-F,NR1H3,STXBP3,SYN2,PINK1,MCTP2,HPS6,ACSL3,PSEN1,ANG,SLC…
GO:BP	MAPK cascade	GO:0000165	FALSE	4.68E-78	77.3298	744	3059	172	78724	MAP2K2,NCF1,LAMTOR2,LAPTM5,DOK1,S100A12,LILRA5,SH2D3C,CTNNB1,NRG1,ARRB1,MAPK1,MAP4K4,MAP2K6,PRKCD,MAP3K6,BMP2,CSF1R,TLR7,CEACAM1,SYK,GRB10,MAPKAPK2,GRB2,PRKD2,PYCARD,JAK2,HMGCR,CCM2,GNAI2,IL1B,MEF2A,MAP3K3,SPI1,PDGFRB,DOK3,APP,SLA,NF2,CAMKK2,DOK4,PRDX1,TBC1D10C,SHC1,NMNAT1,MAP3K5,SMAD1,PIK3R5,PINK1,STK4,TRAF7,EIF2AK2,LAMTOR1,STK3,IRAK3,PTPN6,RGS14,INHBA,GBP1,SPHK1,TRAF6,MYD88,CSK,C5AR1,PRDX2,NBR1…
GO:BP	generation of neurons	GO:0048699	FALSE	6.49E-78	77.1878	1536	3059	247	78724	MAP2K2,SEMA4D,TWF2,GSK3A,B4GALT5,PTEN,ANKS1A,ASCL2,MARK2,CTNNB1,FKBP4,BCL6,KIAA0319L,GRN,DBN1,GLA,MAP4K4,SCLT1,GFRA3,EFNA4,RAC1,MAP1S,RAB13,DIP2B,SMARCD3,BMP2,SEMA4A,TOR1A,CSF1R,UQCRQ,YWHAG,GBA2,KIAA0319,RHOG,LYPLA2,HDAC5,ATF5,IST1,HMG20B,RAB10,TSPO,NUMBL,JAK2,EFHD1,FBXO45,MEF2A,SIPA1L1,CEBPB,APP,IER2,S100A9,PREX1,DGKG,STYXL1,OLIG1,PDLIM5,TMEM30A,ARF4,CYFIP1,KREMEN1,ARSB,FOLR1,KIF13B,SPAST,ACSL3,…
GO:BP	cell projection organization	GO:0030030	FALSE	6.56E-78	77.183	1631	3059	255	78724	MAP2K2,SEMA4D,TWF2,GSK3A,B4GALT5,LRRC61,PTEN,CAPG,MARK2,ARAP1,ARPC2,CLCN4,CTNNB1,FKBP4,CDC42EP4,RP2,GRN,DBN1,GLA,MAP4K4,SCLT1,GFRA3,EFNA4,RAC1,MAP1S,RAB13,KLF5,DIP2B,DUSP23,PRKCD,SEMA4A,TOR1A,CSF1R,WAS,KIAA0319,RHOG,LYPLA2,IST1,RAB10,ATG3,TSPO,NUMBL,JAK2,SNAP29,EFHD1,FBXO45,MEF2A,FGD3,PTPN23,CCDC13,SIPA1L1,APP,S100A9,CORO1A,PREX1,DGKG,STYXL1,OLIG1,PDLIM5,TMEM30A,ARF1,ARF4,EHD4,CYFIP1,KREMEN1,QRIC…
GO:BP	regulation of cellular component biogenesis	GO:0044087	FALSE	1.26E-77	76.8981	1011	3059	199	78724	SEMA4D,TWF2,PTEN,F11R,CAPG,ARAP1,ZDHHC12,ARPC2,TICAM1,CTNNB1,NRG1,FKBP4,SAMD8,RAB7A,CDC42EP4,WIPI1,JMJD6,FLII,LCP1,HCLS1,MAP4K4,RAC1,TFIP11,LRFN1,KLF5,SLC9A1,PRKCD,SEMA4A,APOA1,CLSTN1,WAS,TBC1D14,GBA2,SYK,RAB3GAP2,CLIP1,OPRD1,RHOG,GRB2,ATG3,PYCARD,PXN,MTMR3,SVIL,BTK,IL1B,CHMP4B,CTNNBIP1,CHMP2A,SYP,ARL2,PRKACA,HAUS4,APP,CARD8,CORO1A,CHMP1A,PREX1,STYXL1,SMPD3,PDLIM5,NF2,TLR2,ARF4,VPS4B,VPS39,CYFIP1…
GO:BP	monoatomic cation transport	GO:0006812	FALSE	3.85E-77	76.4145	1069	3059	204	78724	ANO10,CYBA,NDUFB1,TRPC6,CACNA1E,NDUFS2,LMTK2,TMEM63B,LILRA5,TCN2,CTNNB1,FKBP4,WWP2,ATP6V0E1,TESC,DIAPH1,RNASEK,CD63,SLC36A1,CRACR2B,NDFIP1,ATP6V0A1,HOMER3,SLC34A3,CTSS,SLC9A1,UQCR10,VDR,SLC15A3,NDUFB4,ARHGAP1,OPRD1,ORAI3,UBASH3B,ASPH,NDUFA1,TSPO,GHITM,AKAP5,GNAI2,ATP6AP1,ATP6V1E1,PANX1,GNB2,PDGFRB,LCN2,PRKACA,SLC31A2,SLC25A22,SLC24A3,CORO1A,SLC12A9,VPS4B,SLC4A8,G6PD,SLC8A1,LTF,ATP1B3,BAK1,PSEN1,G…
GO:BP	regulation of cell migration	GO:0030334	FALSE	7.96E-77	76.0989	960	3059	193	78724	RIN3,MIIP,SEMA4D,EMILIN2,PTEN,ASCL2,GAB1,IFITM1,RIPK3,ADORA3,MAPK1,GRN,MAP4K4,RAC1,TMSB10,BMP2,SEMA4A,CSF1R,CEACAM1,HDAC5,CD151,PRKD2,TNFSF18,MCTP1,FERMT3,PYCARD,FGR,MOSPD2,JAK2,CCL23,C3AR1,GNAI2,IL1B,MAP3K3,PTPN23,PDGFRB,SAP30,APP,CORO1A,PREX1,TRIP6,FUT7,SMPD3,NF2,SAP30L,ARSB,STK4,PADI2,ACTG1,MIEN1,CXCL14,CLN3,AAMP,IRS2,RTN4,MYADM,CD274,SPHK1,DOCK4,HSPB1,MYD88,RAC2,SRGAP2,C5AR1,CEACAM6,MPP1,CMKL…
GO:BP	positive regulation of transport	GO:0051050	FALSE	2.35E-76	75.6297	847	3059	181	78724	CYBA,CES1,TRPC6,GSK3A,RNASEL,LILRA5,RETN,RXRA,TESC,RPH3AL,FCN1,OAZ2,RAB7A,ARRB1,CD63,HCLS1,CTSS,SLC9A1,MAP2K6,UNC13D,PRKCD,BMP2,APOA1,TOR1A,C2CD2L,LAMP1,S100A8,SYK,FCER1G,CD151,ASPH,CFP,PYCARD,FGR,TSPO,JAK2,AKAP5,BTK,IL1B,MEF2A,CHMP2A,PTPN23,PDGFRB,PRKACA,CEBPB,SMPD3,NF2,TLR2,TMEM30A,VPS4B,SLC4A8,HLA-F,G6PD,NR1H3,PINK1,OAZ1,ATP1B3,BAK1,ACSL3,PSEN1,ANG,CLN3,IRS2,P2RX1,INHBA,TRIM28,ABCA13,MAPK14,KC…
GO:BP	plasma membrane bounded cell projection organization	GO:0120036	FALSE	1.50E-75	74.8252	1588	3059	248	78724	MAP2K2,SEMA4D,TWF2,GSK3A,B4GALT5,LRRC61,PTEN,MARK2,ARAP1,ARPC2,CLCN4,CTNNB1,FKBP4,CDC42EP4,RP2,GRN,DBN1,GLA,MAP4K4,SCLT1,GFRA3,EFNA4,RAC1,MAP1S,RAB13,KLF5,DIP2B,DUSP23,PRKCD,SEMA4A,TOR1A,CSF1R,WAS,KIAA0319,RHOG,LYPLA2,IST1,RAB10,ATG3,TSPO,NUMBL,JAK2,SNAP29,EFHD1,FBXO45,MEF2A,FGD3,PTPN23,CCDC13,SIPA1L1,APP,S100A9,CORO1A,PREX1,DGKG,STYXL1,OLIG1,PDLIM5,TMEM30A,ARF1,ARF4,EHD4,CYFIP1,KREMEN1,ARSB,FOLR…
GO:BP	organophosphate metabolic process	GO:0019637	FALSE	5.74E-75	74.2409	1077	3059	202	78724	AGPAT2,NDUFB1,HK2,GSK3A,HK3,NDUFS2,PTEN,AGPAT3,TP53I3,SAMD8,PGD,GTPBP1,PDXK,INPP5D,GPD2,PDK3,FAR2,RPIA,ITPKC,SMPDL3A,PRKCD,NDUFB4,ITPK1,APOA1,PFKFB4,AKR1A1,TKT,LIPA,CDIPT,PTDSS2,NDUFA1,TSPO,HMGCR,OSBPL5,MTMR3,UPP1,PGM1,PRDX6,ARL2,PRKACA,SLC27A2,APP,GMPR2,SLC25A22,TJP2,NT5C2,DGKG,SMPD3,HSD17B4,PLSCR1,G6PD,ACOT8,NR1H3,NMNAT1,ACSBG1,PIK3R5,PINK1,TALDO1,ACSL3,PSEN1,HADHA,UGGT1,MGAT1,NDUFV2,FIG4,NDUFC…
GO:BP	leukocyte differentiation	GO:0002521	FALSE	1.81E-74	73.7429	636	3059	156	78724	CEBPA,ASCL2,LOXL3,TYROBP,NFAM1,CTNNB1,TESC,RIPK3,BCL6,JMJD6,NLRP3,SASH3,HCLS1,INPP5D,NDFIP1,CD101,FOSL2,SMARCD3,PGLYRP1,BMP2,SEMA4A,CSF1R,CEACAM1,VAV1,SYK,LIPA,FCER1G,HDAC5,MAFB,UBASH3B,NFIL3,OSCAR,BTK,ATP6AP1,IL1B,CTNNBIP1,SPI1,LGALS1,BATF,CLEC4E,CEBPB,APP,SLC46A2,PREX1,BRD4,FUT7,LRRK1,TLR2,LTF,HLX,QKI,LBR,BAK1,PSEN1,IRF1,JAK3,RB1,PTPN6,INHBA,IFNK,FGL2,TRAF6,MYD88,PRDX2,MAPK14,LILRB4,NEDD9,PPARG…
GO:BP	regulation of innate immune response	GO:0045088	FALSE	2.91E-74	73.5356	449	3059	133	78724	CYBA,NCF1,NLRC4,ZDHHC12,CASP1,TYROBP,TICAM1,FCN1,AKIRIN2,NLRP3,GRN,SMPDL3A,CTSS,MAP2K6,SLC15A3,TLR7,LAMP1,S100A8,CEACAM1,VAV1,TLR8,SYK,MAPKAPK2,ECSIT,PYCARD,FGR,CREBBP,TLR5,BTK,SPI1,PVR,CLEC4E,SLC46A2,S100A9,CARD8,TRAFD1,EIF4E2,TLR2,ZCCHC3,HLA-F,PLSCR1,HLA-E,LTF,NR1H3,TLR1,RNF185,EIF2AK2,IRF1,PARP9,CEP63,IRAK3,PTPN6,SLC19A1,ZDHHC3,RTN4,IFNK,CD274,TRAF6,SLC15A4,TRIM25,MYD88,RNF135,CD300LF,YWHAZ,HS…
GO:BP	positive regulation of defense response	GO:0031349	FALSE	5.68E-74	73.2454	506	3059	140	78724	CYBA,NLRC4,EMILIN2,CEBPA,S100A12,ZDHHC12,CASP1,LILRA5,TYROBP,MGST2,TICAM1,FCN1,AKIRIN2,NLRP3,IL17RA,GRN,SMPDL3A,CTSS,MAP2K6,SLC15A3,TLR7,LAMP1,S100A8,VAV1,TLR8,SYK,MAPKAPK2,ECSIT,PYCARD,CREBBP,TLR5,BTK,IL1B,MMP8,SPI1,LGALS1,PVR,CLEC4E,CEBPB,APP,SLC46A2,S100A9,CARD8,TLR2,ZCCHC3,HLA-F,PLSCR1,HLA-E,LTF,NR1H3,TLR1,RNF185,EIF2AK2,IRF1,PARP9,IRAK3,SLC19A1,ZDHHC3,RTN4,IFNK,GBP1,CD274,TRAF6,SLC15A4,TRIM2…
GO:BP	neuron differentiation	GO:0030182	FALSE	7.52E-74	73.1239	1451	3059	234	78724	MAP2K2,SEMA4D,TWF2,GSK3A,B4GALT5,PTEN,ANKS1A,ASCL2,MARK2,CTNNB1,FKBP4,BCL6,GRN,DBN1,GLA,MAP4K4,SCLT1,GFRA3,EFNA4,RAC1,MAP1S,RAB13,DIP2B,BMP2,SEMA4A,TOR1A,CSF1R,UQCRQ,YWHAG,GBA2,KIAA0319,RHOG,LYPLA2,HDAC5,ATF5,IST1,HMG20B,RAB10,TSPO,NUMBL,JAK2,EFHD1,FBXO45,MEF2A,SIPA1L1,CEBPB,APP,IER2,S100A9,PREX1,DGKG,STYXL1,OLIG1,PDLIM5,TMEM30A,ARF4,CYFIP1,KREMEN1,ARSB,FOLR1,KIF13B,SPAST,ACSL3,PSEN1,CUX1,ACTG1,U…
GO:BP	regulation of phosphorus metabolic process	GO:0051174	FALSE	8.26E-74	73.083	957	3059	189	78724	MAP2K2,NCF1,SEMA4D,GSK3A,CCND3,PTEN,S100A12,MARK2,LILRA5,NRG1,MVP,SERTAD1,RIPK3,ARRB1,MAPK1,HCLS1,PDK3,RAC1,SMG5,CDKN2C,PRKCD,BMP2,APOA1,CSF1R,TLR7,CEACAM1,YWHAG,TLR8,SYK,OPRD1,GRB10,SESN2,TNFSF18,PYCARD,FGR,TSPO,JAK2,MTMR3,IL1B,PDGFRB,ARL2,PRKACA,PPP1R15B,APP,ZNF592,SMPD3,LRRK1,NF2,CAMKK2,PLAUR,EHD4,SLC8A1,LTF,JTB,MAP3K5,PIK3R5,PINK1,STK4,BAK1,ACSL3,PSEN1,ANG,PARP9,RB1,IRS2,IRAK3,PTPN6,RGS14,INH…
GO:BP	regulation of cellular localization	GO:0060341	FALSE	1.82E-73	72.7397	1013	3059	194	78724	MAP2K2,CTSD,GSK3A,NSFL1C,TRIM8,TYROBP,OS9,CTNNB1,WWP2,RPH3AL,OAZ2,HSPA1L,STX10,VPS26B,LCP1,MAPK1,HCLS1,NDFIP1,MAP4K4,PRKCD,NUP214,TOR1A,ARHGAP1,C2CD2L,LAMP1,YWHAG,RHOG,SESN2,ASPH,PLEKHM2,CREBBP,JAK2,HMGCR,AKAP5,IL1B,SPI1,PTPN23,PRKACA,SLC25A22,NF2,TLR2,TMEM30A,UBXN2B,NR1H3,PINK1,OAZ1,BAK1,ACSL3,PSEN1,ANG,LAMTOR1,PARP9,VCPIP1,DTX3L,CLN3,IRS2,KCNAB2,TYK2,RTN4,SIDT2,TRIM28,CDK5R1,GBP1,TRAF6,TRIM25,R…
GO:BP	regulation of cell adhesion	GO:0030155	FALSE	2.25E-73	72.6476	794	3059	172	78724	SEMA4D,LAPTM5,EMILIN2,PTEN,F11R,ASCL2,LOXL3,SIPA1,ARPC2,FLOT2,NRG1,TESC,BCL6,NLRP3,SASH3,NDFIP1,MAP4K4,RAC1,SLC9A1,UNC13D,SMARCD3,PRKCD,BMP2,APOA1,CEACAM1,YWHAG,VAV1,SYK,UBASH3B,PRKD2,TNFSF18,FERMT3,PYCARD,JAK2,IL1B,SPI1,LGALS1,PTPN23,ARL2,CEBPB,CORO1A,PREX1,BRD4,APBB1IP,FUT7,NF2,PLAUR,TGFBI,HLA-E,HLX,STK4,ACTG1,IRF1,JAK3,VAV3,PTPN6,TYK2,MYADM,FGL2,GBP1,CD274,TRAF6,RAC2,CSK,PRDX2,MAPK14,CEACAM6,A…
GO:BP	multicellular organismal-level homeostasis	GO:0048871	FALSE	3.44E-73	72.4634	825	3059	175	78724	MTF1,CEBPA,TMEM63B,F11R,CTNNB1,RIPK3,RAB7A,BCL6,JMJD6,SASH3,HCLS1,INPP5D,RCOR1,SLC1A5,DNASE2,BTBD9,FOSL2,MAP2K6,CSF1R,SYK,GRB10,LIPA,MAFB,UBASH3B,SLC2A1,ALAS1,JAK2,OSCAR,BTK,IL1B,CHMP4B,SPI1,LCN2,PRKACA,CEBPB,KLF2,SLC46A2,TJP2,CORO1A,MAEA,LRRK1,CRISPLD1,PRDX1,MFN2,G6PD,ESRRB,NR1H3,RMI1,FBXL5,QKI,SH2B2,BAK1,ACTG1,UBB,ABCC6,JAK3,RB1,ACADVL,INHBA,SFXN5,TRAF6,SLC15A4,RAC2,CSK,DDIT3,PRDX2,MAPK14,SLC40…
GO:BP	cell-cell adhesion	GO:0098609	FALSE	4.01E-73	72.3966	976	3059	190	78724	SEMA4D,LAPTM5,EMILIN2,F11R,SELPLG,ASCL2,PCDH1,LOXL3,FLOT2,CTNNB1,BCL6,NLRP3,SASH3,NDFIP1,GLA,SMARCD3,PRKCD,BMP2,APOA1,CLSTN1,SELL,S100A8,CEACAM1,YWHAG,VAV1,SYK,UBASH3B,FERMT3,RAB10,PYCARD,JAK2,IL1B,SERPINB8,SPI1,LGALS1,PTPN23,MPZL2,PVR,CEBPB,TJP2,S100A9,CORO1A,BRD4,FUT7,PDLIM5,NF2,PLAUR,SHC1,HLA-E,STXBP3,COL8A2,HLX,PSEN1,ACTG1,IRF1,JAK3,PTPN6,TYK2,CDK5R1,MYADM,FGL2,ENTPD1,CD274,TRAF6,HSPB1,RAC2,C…
GO:BP	regulation of phosphate metabolic process	GO:0019220	FALSE	4.42E-73	72.3542	956	3059	188	78724	MAP2K2,NCF1,SEMA4D,GSK3A,CCND3,PTEN,S100A12,MARK2,LILRA5,NRG1,MVP,SERTAD1,RIPK3,ARRB1,MAPK1,HCLS1,PDK3,RAC1,SMG5,CDKN2C,PRKCD,BMP2,APOA1,CSF1R,TLR7,CEACAM1,YWHAG,TLR8,SYK,OPRD1,GRB10,SESN2,TNFSF18,PYCARD,FGR,TSPO,JAK2,MTMR3,IL1B,PDGFRB,ARL2,PRKACA,PPP1R15B,APP,ZNF592,SMPD3,LRRK1,NF2,CAMKK2,PLAUR,EHD4,SLC8A1,LTF,JTB,MAP3K5,PIK3R5,PINK1,STK4,BAK1,ACSL3,PSEN1,ANG,PARP9,RB1,IRS2,IRAK3,PTPN6,RGS14,INH…
GO:BP	regulation of vesicle-mediated transport	GO:0060627	FALSE	6.56E-73	72.1833	531	3059	142	78724	CYBA,MAP2K2,RIN3,DYSF,NRG1,RPH3AL,FCN1,RAB7A,ARRB1,CD63,MAPK1,DNAJC5,RAC1,BTBD9,UNC13D,APOA1,TOR1A,ARHGAP1,LAMP1,CEACAM1,SYK,STXBP2,FCER1G,ANKRD13D,AP2S1,CD151,MCTP1,CFP,ATG3,PYCARD,FGR,AKAP5,GNAI2,BTK,FBXO45,CHMP2A,SPI1,PTPN23,CORO1A,SMPD3,NF2,TLR2,ARF1,VPS4B,SLC4A8,EHD4,HLA-F,PLSCR1,NR1H3,STXBP3,ACSL3,PSEN1,ACTG1,PRAM1,LRPAP1,CLN3,P2RX1,CDK5R1,ABCA13,SPHK1,RAC2,CSK,EHD1,CD300LF,MSN,EFNB2,PPARG,…
GO:BP	chemical homeostasis	GO:0048878	FALSE	8.66E-73	72.0626	1043	3059	196	78724	CYBA,NCF1,CES1,TRPC6,HK2,HK3,CEBPA,TMEM63B,ATP6V0E1,RPH3AL,DIAPH1,RAB7A,RNASEK,MAPK1,NDFIP1,ATP6V0A1,GRN,MAP4K4,PDK3,ASGR2,SLC34A3,BTBD9,FOSL2,SLC9A1,VDR,APOA1,C2CD2L,LAMP1,HERPUD1,LIPA,UBASH3B,SESN2,ASPH,TSPO,CCL23,TBXAS1,GHITM,ATP6AP1,PRKACA,SLC31A2,APP,SLC24A3,CORO1A,MT1F,EGLN1,CCDC22,SLC12A9,ARF1,SLC4A8,SLC8A1,NR1H3,STXBP3,RMI1,FBXL5,DMXL2,ATP1B3,HPS6,BAK1,PSEN1,PDZD8,LAMTOR1,ABCC6,ACO1,WDTC1…
GO:BP	circulatory system development	GO:0072359	FALSE	1.20E-71	70.9212	1145	3059	204	78724	MAP2K2,HK2,GSK3A,EMILIN2,PTEN,AP1B1,GAB1,TNFRSF1B,CTNNB1,NRG1,JMJD6,MAPK1,GRN,KLF5,TNFRSF12A,SLC9A1,CAMP,SMARCD3,BMP2,SEMA4A,NCOA6,CEACAM1,HPSE,SYK,LIPA,HDAC5,PRKD2,EPN1,PCSK5,SRPK2,CCM2,C3AR1,IL1B,MEF2A,MAP3K3,PDGFRB,KLF2,HIF3A,SPINT1,PDLIM2,EGLN1,PDLIM5,SHC1,TGFBI,VPS4B,G6PD,SLC8A1,TNFSF12,PDLIM7,COL8A2,SMAD1,FOLR1,QKI,STK4,BAK1,PSEN1,ACTG1,ANG,NDUFV2,RB1,VAV3,STK3,HS6ST1,AAMP,PTPN6,INHBA,RTN4,…
GO:BP	export from cell	GO:0140352	FALSE	2.95E-71	70.5295	928	3059	183	78724	SYNGR1,AP1B1,TMEM63B,DYSF,EXOC3,TNFRSF1B,RETN,RPH3AL,ADORA3,RAB7A,DNAJC5,MAP4K4,RAB13,SLC1A5,SLC9A1,MAP2K6,UNC13D,BMP2,C2CD2L,LAMP1,CEACAM1,SYK,STXBP2,ITSN1,MCTP1,RAB10,FGR,TSPO,PCSK5,JAK2,SNAP29,HMGCR,GNAI2,BTK,IL1B,FBXO45,CHMP2A,SYP,SPI1,PTPN23,SYTL3,PRKACA,SLC25A22,CORO1A,SMPD3,TLR2,VPS4B,SLC4A8,HLA-F,SLC8A1,NR1H3,STXBP3,SYN2,PINK1,MCTP2,ATP1B3,HPS6,PSEN1,ANG,SLC38A2,PRAM1,ARL8B,IRS2,P2RX1,INH…
GO:BP	autophagy	GO:0006914	FALSE	3.44E-71	70.4636	597	3059	148	78724	VPS37B,CTSD,GSK3A,NSFL1C,SBF2,MARK2,TFEB,TRIM8,RRAGD,ZFYVE1,TICAM1,QSOX1,ATP6V0E1,TOM1,RAB7A,WIPI1,VPS26B,ARHGAP26,ATP6V0A1,RAB24,MAP1S,DRAM1,ATG9A,S100A8,TBC1D14,RAB3GAP2,VPS37C,SESN2,TOLLIP,ATG3,PYCARD,TSPO,SNAP29,MTMR3,TECPR2,CHMP4B,CHMP2A,ATP6V1E1,CISD1,PRKACA,S100A9,CHMP1A,CAMKK2,UBXN2B,VPS4B,MFN2,CTSA,VPS39,PSAP,ARSB,RGS19,TMEM208,PINK1,PSEN1,RNF185,SNX32,CLN3,ARL8B,KDM4A,INHBA,PHF23,CDK5R1…
GO:BP	process utilizing autophagic mechanism	GO:0061919	FALSE	3.44E-71	70.4636	597	3059	148	78724	VPS37B,CTSD,GSK3A,NSFL1C,SBF2,MARK2,TFEB,TRIM8,RRAGD,ZFYVE1,TICAM1,QSOX1,ATP6V0E1,TOM1,RAB7A,WIPI1,VPS26B,ARHGAP26,ATP6V0A1,RAB24,MAP1S,DRAM1,ATG9A,S100A8,TBC1D14,RAB3GAP2,VPS37C,SESN2,TOLLIP,ATG3,PYCARD,TSPO,SNAP29,MTMR3,TECPR2,CHMP4B,CHMP2A,ATP6V1E1,CISD1,PRKACA,S100A9,CHMP1A,CAMKK2,UBXN2B,VPS4B,MFN2,CTSA,VPS39,PSAP,ARSB,RGS19,TMEM208,PINK1,PSEN1,RNF185,SNX32,CLN3,ARL8B,KDM4A,INHBA,PHF23,CDK5R1…
GO:BP	T cell activation	GO:0042110	FALSE	6.10E-71	70.2148	582	3059	146	78724	LAPTM5,CCND3,ASCL2,ELF4,LOXL3,TYROBP,TNFRSF1B,FLOT2,CTNNB1,RIPK3,BCL6,JMJD6,NLRP3,LCP1,SASH3,NDFIP1,FOSL2,SMARCD3,SEMA4A,WAS,CEACAM1,YWHAG,VAV1,SYK,LIPA,FCER1G,MAFB,GRB2,CD151,TNFSF18,PYCARD,JAK2,IL1B,SPI1,LGALS1,BATF,CLEC4E,CEBPB,SLC46A2,CORO1A,PREX1,BRD4,APBB1IP,FUT7,HLA-E,HLX,KIF13B,PSEN1,IRF1,JAK3,CLC,PTPN6,TYK2,IFNK,FGL2,CD274,TRAF6,RAC2,CSK,PRDX2,MFAP3,DUSP3,TNFAIP8L2,TNFRSF14,MSN,LILRB4,HL…
GO:BP	positive regulation of protein metabolic process	GO:0051247	FALSE	9.59E-71	70.018	1039	3059	193	78724	MAP2K2,NCF1,SEMA4D,NLRC4,LAPTM5,GSK3A,CCND3,CEBPA,PTEN,S100A12,MARK2,UBE2S,LILRA5,PSENEN,TNFRSF1B,TICAM1,CTNNB1,NRG1,RNF111,OAZ2,RIPK3,RAB7A,ARRB1,RAD23A,FBXW11,MAPK1,HCLS1,NDFIP1,GRN,RAC1,DIP2B,F12,PRKCD,BMP2,CSF1R,SYK,RAB3GAP2,OPRD1,AURKAIP1,HERPUD1,IST1,ASPH,TNFSF18,TOLLIP,JAK2,IL1B,PDGFRB,KLF2,APP,LRRK1,CCDC22,CAMKK2,PTTG1IP,PLAUR,EHD4,LTF,NR1H3,TNFSF12,JTB,FBXL5,MAP3K5,PIK3R5,PINK1,OAZ1,STK4…
GO:BP	positive regulation of cytokine production	GO:0001819	FALSE	1.72E-70	69.7647	494	3059	135	78724	CYBA,AGPAT2,NLRC4,LAPTM5,CASP1,LILRA5,TYROBP,NFAM1,TICAM1,FCN1,AKIRIN2,NLRP3,IL17RA,SASH3,SECTM1,CSF1R,TLR7,FRMD8,HPSE,TLR8,SYK,MAPKAPK2,FCER1G,PRKD2,PYCARD,FGR,ORM2,JAK2,C3AR1,TLR5,BTK,IL1B,MMP8,PANX1,BATF,CLEC4E,CEBPB,APP,CARD8,TNFRSF8,TLR2,ZCCHC3,HLA-F,HLA-E,TLR1,PSEN1,EIF2AK2,IRF1,IRAK3,TYK2,RTN4,CD274,SPHK1,TRAF6,ORM1,HSPB1,MYD88,DDIT3,C5AR1,RNF135,AGPAT1,MAPK14,BRCA1,HSP90AA1,TNFRSF14,HLA-A…
GO:BP	system process	GO:0003008	FALSE	2.11E-70	69.6751	2293	3059	295	78724	CYBA,AGTRAP,COPA,GSK3A,OPA3,EMILIN2,PTEN,TMEM63B,F11R,CYB5R3,DGCR2,TNFRSF1B,OR1J4,RETN,DIAPH1,ADORA3,ARRB1,TSHZ3,RP2,MAPK1,TMEM120A,HRH2,SLC1A5,BTBD9,SLC9A1,MAP2K6,VDR,APOA1,CEACAM1,LTB4R,GM2A,LIPA,ANKRD2,ASPH,FLI1,TSPO,PCSK5,ATXN1L,SLC2A1,HMGCR,TBXAS1,C3AR1,GNAI2,IL1B,CHMP4B,MEF2A,CTNNBIP1,PRKACA,KLF2,APP,SLC24A3,TJP2,ALOXE3,OR10H2,PDLIM5,TLR2,TGFBI,ARF4,SLC4A8,G6PD,SLC8A1,NR1H3,CYFIP1,SMTN,SCPE…
GO:BP	organic acid metabolic process	GO:0006082	FALSE	7.31E-70	69.1358	915	3059	180	78724	CES1,NLRC4,HK2,HK3,SLC16A3,MPST,TST,CASP1,MGST2,STAR,PGD,MSRA,HSD3B7,PDK3,MGST3,AKR1A1,CEACAM1,GBA2,SYK,LIPA,MAPKAPK2,LYPLA2,SESN2,SLC7A7,PYCARD,SLC2A1,TBXAS1,HADHB,IL1B,PGM1,DEGS1,ARL2,PRKACA,SLC27A2,APP,MTARC1,AOAH,ALOXE3,PCBD1,TLR2,HSD17B4,ACOT8,NR1H3,ACSBG1,FOLR1,SCPEP1,QKI,ACSL3,PSEN1,HADHA,ACSS2,ACO1,MTHFD2,WDTC1,CBR1,CLN3,IRS2,SLC19A1,ACADVL,PLA2G15,ERLIN1,SLC2A3,EIF6,TPI1,PIPOX,OSBPL1A,SD…
GO:BP	oxoacid metabolic process	GO:0043436	FALSE	1.00E-68	67.9983	909	3059	178	78724	CES1,NLRC4,HK2,HK3,SLC16A3,MPST,TST,CASP1,MGST2,STAR,PGD,MSRA,HSD3B7,PDK3,MGST3,AKR1A1,CEACAM1,GBA2,SYK,LIPA,MAPKAPK2,LYPLA2,SESN2,SLC7A7,PYCARD,SLC2A1,TBXAS1,HADHB,IL1B,PGM1,DEGS1,ARL2,PRKACA,SLC27A2,APP,MTARC1,AOAH,ALOXE3,PCBD1,TLR2,HSD17B4,ACOT8,NR1H3,ACSBG1,FOLR1,SCPEP1,QKI,ACSL3,PSEN1,HADHA,ACSS2,ACO1,MTHFD2,WDTC1,CBR1,CLN3,IRS2,SLC19A1,ACADVL,PLA2G15,ERLIN1,SLC2A3,EIF6,TPI1,PIPOX,OSBPL1A,SD…
GO:BP	regulation of cell activation	GO:0050865	FALSE	1.77E-68	67.7513	632	3059	149	78724	LAPTM5,EMILIN2,CEBPA,F11R,ASCL2,LOXL3,LILRA5,TYROBP,NFAM1,TNFRSF1B,FLOT2,TICAM1,CTNNB1,RIPK3,AKIRIN2,BCL6,NLRP3,SASH3,INPP5D,NDFIP1,GRN,SMARCD3,PRKCD,PGLYRP1,CEACAM1,YWHAG,VAV1,SYK,FCER1G,UBASH3B,TNFSF18,PYCARD,FGR,JAK2,BTK,IL1B,MMP8,SPI1,LGALS1,BATF,CEBPB,SLC46A2,CORO1A,BRD4,TBC1D10C,PLSCR1,HLA-E,NR1H3,TNFSF12,HLX,IRF1,JAK3,VAV3,BPI,IRS2,CLC,PTPN6,TYK2,INHBA,FGL2,CD274,SPHK1,TRAF6,SLC15A4,MYD88,…
GO:BP	proteolysis involved in protein catabolic process	GO:0051603	FALSE	3.91E-68	67.4078	786	3059	165	78724	VPS37B,CTSB,LAPTM5,GSK3A,NSFL1C,CEBPA,PTEN,ANAPC11,UBE2S,KLHL8,OS9,CTNNB1,RNF111,WWP2,AKIRIN2,ARRB1,ARRDC1,FBXO6,RAD23A,FBXW11,NDFIP1,DCAF11,CTSS,FBXO27,TOR1A,UBA52,HERPUD1,RNF144B,VPS37C,DNAJB12,RBCK1,TOLLIP,MAN1A1,CHMP4B,FBXO45,CHMP2A,PTPN23,PRKACA,PSME1,PSMD13,SHARPIN,CHMP1A,MAEA,KCTD5,CCDC22,UBXN2B,VPS4B,QRICH2,FBXL5,PINK1,PSME2,PSMD2,TRAF7,PSEN1,UGGT1,RNF185,UBB,DTX3L,UBE2H,PSMD4,ERLIN1,TRIM…
GO:BP	cell cycle process	GO:0022402	FALSE	5.78E-68	67.2379	1280	3059	211	78724	MIIP,ARL8A,KLHDC8B,NSFL1C,CCND3,PTEN,DYNLT1,ANAPC11,UBE2S,UPF1,EXOC3,CTNNB1,BCL6,FBXO6,FBXW11,SRPK1,MAP1S,GNB1L,CDKN2C,SMARCD3,CETN2,AURKAIP1,REEP4,ATF5,TDRD9,IST1,MTMR3,SVIL,IL1B,CHMP4B,CHMP2A,PDGFRB,ARL2,PSME1,HAUS4,APP,PSMD13,PHF13,CENPK,CHMP1A,BRD4,NAA60,SMPD3,MSH6,UBXN2B,ARF1,VPS4B,NUSAP1,PLSCR1,JTB,RMI1,KIF13A,DCTN2,PSME2,SPAST,UBB,PARP9,PPP1R10,CEP63,DTX3L,RB1,DCTN3,ARL8B,PTPN6,RGS14,INHBA…
GO:BP	cellular response to endogenous stimulus	GO:0071495	FALSE	5.96E-68	67.2244	1223	3059	206	78724	TWF2,CTSD,AGTRAP,CTSB,GSK3A,GAB1,TNFRSF1B,HTRA3,CTNNB1,RNF111,RXRA,FKBP4,BLVRB,CD63,MAPK1,RAB13,CTSS,SLC9A1,VDR,PRKCD,BMP2,CEACAM1,YWHAG,PTPRE,OPRD1,GRB10,MAPKAPK2,HDAC5,GRB2,PRKD2,RAB10,SORT1,PXN,CREBBP,JAK2,GNAI2,IL1B,ACAP2,PDGFRB,PRKACA,SAP30,KLF2,CORO1A,SPINT1,ZNF592,FUT7,SMPD3,SHC1,SAP30L,EHD4,ESRRB,NR1H3,CYFIP1,SMAD1,FOLR1,GNB1,PADI2,SH2B2,SAFB,JAK3,RB1,WDTC1,IRS2,TYK2,INHBA,SPHK1,HSPB1,APA…
GO:BP	tube development	GO:0035295	FALSE	6.83E-68	67.1655	1101	3059	195	78724	MAP2K2,HK2,EMILIN2,CEBPA,LOXL3,GAB1,CTNNB1,DEAF1,JMJD6,MAPK1,GRN,KLF5,TNFRSF12A,FOSL2,CAMP,VDR,ITPK1,BMP2,SEMA4A,CSF1R,CEACAM1,HPSE,SYK,LIPA,HDAC5,PRKD2,EPN1,PCSK5,ATXN1L,SRPK2,CCM2,C3AR1,IL1B,CTNNBIP1,MAP3K3,PDGFRB,PRKACA,KLF2,HIF3A,SPINT1,EGLN1,SMPD3,SHC1,TGFBI,VPS4B,TNFSF12,COL8A2,HLX,SMAD1,FOLR1,QKI,STK4,BAK1,PSEN1,ACTG1,UBB,ANG,RB1,VAV3,STK3,HS6ST1,AAMP,PTPN6,CRISPLD2,RTN4,SPHK1,TRAF6,HSPB1,…
GO:BP	secretion by cell	GO:0032940	FALSE	1.96E-67	66.7087	854	3059	171	78724	SYNGR1,AP1B1,TMEM63B,DYSF,EXOC3,TNFRSF1B,RETN,RPH3AL,ADORA3,RAB7A,DNAJC5,MAP4K4,RAB13,SLC1A5,MAP2K6,UNC13D,BMP2,C2CD2L,LAMP1,CEACAM1,SYK,STXBP2,ITSN1,MCTP1,RAB10,FGR,TSPO,PCSK5,JAK2,SNAP29,HMGCR,GNAI2,BTK,IL1B,FBXO45,CHMP2A,SYP,SPI1,PTPN23,SYTL3,PRKACA,SLC25A22,CORO1A,SMPD3,TLR2,VPS4B,SLC4A8,HLA-F,NR1H3,STXBP3,SYN2,PINK1,MCTP2,HPS6,PSEN1,ANG,SLC38A2,PRAM1,ARL8B,IRS2,P2RX1,INHBA,SIDT2,RAC2,SYNGR2,…
GO:BP	monoatomic ion transmembrane transport	GO:0034220	FALSE	4.99E-67	66.3017	1048	3059	189	78724	ANO10,CYBA,NDUFB1,TRPC6,CACNA1E,NDUFS2,TMEM63B,TCN2,CLCN4,WWP2,ATP6V0E1,TESC,DIAPH1,RNASEK,CD63,TMEM120A,SLC36A1,ATP6V0A1,APOL1,SLC34A3,CTSS,SLC9A1,UQCR10,SLC15A3,NDUFB4,ORAI3,UBASH3B,ASPH,NDUFA1,GHITM,AKAP5,ATP6AP1,ATP6V1E1,PANX1,GNB2,PRKACA,SLC31A2,SLC25A22,SLC24A3,CORO1A,SLC12A9,SLC4A8,G6PD,SLC8A1,LASP1,ATP1B3,BAK1,PSEN1,GPR35,SLC38A2,NDUFV2,NIPA2,NDUFC1,ABCC6,PTPN6,SLC19A1,P2RX1,KCNAB2,KCNJ15…
GO:BP	membrane organization	GO:0061024	FALSE	7.50E-67	66.1251	821	3059	167	78724	VPS37B,LAPTM5,HK2,GSK3A,NSFL1C,SYNGR1,PTEN,TMEM11,EXOC3,TOM1,RAB7A,STX10,SCLT1,RAC1,SLC9A1,ATP11A,SLC66A2,ATG9A,TRAPPC3,TOR1A,C2CD2L,GBA2,RHOG,REEP4,MAFB,VPS37C,SNAP29,OSBPL5,MTMR3,TMEM43,GHITM,CHMP4B,DEGS1,CHMP2A,SYP,BIN2,S100A9,CORO1A,CHMP1A,TMEM30A,UBXN2B,ARF1,VPS4B,MFN2,PLSCR1,VPS39,FOLR1,PINK1,SPAST,BAK1,NAIF1,VCPIP1,VAV3,CLN3,ARL8B,NDRG1,RTN4,MYADM,SPHK1,TRAPPC5,VPS16,SYNGR2,STAM2,SAMM50,NA…
GO:BP	cell-cell signaling	GO:0007267	FALSE	2.52E-66	65.5987	1342	3059	214	78724	CACNA1E,GSK3A,SYNGR1,PTEN,ZDHHC12,PCDH1,TYROBP,DYSF,TNFRSF1B,RETN,CTNNB1,RPH3AL,ADORA3,GNA15,TSHZ3,MAPK1,DNAJC5,HRH2,DBN1,MAP4K4,EFNA4,KLF5,BTBD9,MAP2K6,TMED1,BMP2,CLSTN1,TOR1A,C2CD2L,S100A8,YWHAG,SYK,STXBP2,TNFSF18,MCTP1,TSPO,PCSK5,JAK2,SNAP29,HMGCR,CCL23,AKAP5,GNAI2,BTK,IL1B,FBXO45,SYP,PANX1,PTPN23,SIPA1L1,PRKACA,APP,SLC25A22,S100A9,SMPD3,ARF1,SLC4A8,CYFIP1,STXBP3,SYN2,PINK1,MCTP2,GNB1,PSEN1,DH…
GO:BP	regulation of MAPK cascade	GO:0043408	FALSE	3.44E-66	65.4634	637	3059	147	78724	MAP2K2,NCF1,LAMTOR2,LAPTM5,DOK1,S100A12,LILRA5,CTNNB1,NRG1,ARRB1,MAPK1,MAP4K4,MAP2K6,PRKCD,BMP2,CSF1R,CEACAM1,SYK,GRB2,PRKD2,PYCARD,JAK2,HMGCR,GNAI2,IL1B,MAP3K3,SPI1,PDGFRB,DOK3,APP,SLA,NF2,DOK4,PRDX1,TBC1D10C,SHC1,NMNAT1,MAP3K5,PIK3R5,PINK1,STK4,TRAF7,EIF2AK2,LAMTOR1,STK3,IRAK3,PTPN6,RGS14,INHBA,GBP1,SPHK1,TRAF6,MYD88,CSK,C5AR1,PRDX2,NBR1,MFAP3,YWHAZ,DUSP3,LILRB4,NAIP,PPARG,TRIM5,LTBR,DUSP6,NLRP…
GO:BP	cell morphogenesis	GO:0000902	FALSE	3.94E-66	65.404	996	3059	183	78724	MAP2K2,SEMA4D,TWF2,B4GALT5,PTEN,F11R,MARK2,ARAP1,SIPA1,CTNNB1,DIAPH1,BCL6,CDC42EP4,DBN1,GLA,MAP4K4,GFRA3,EFNA4,RAC1,MAP1S,DIP2B,FOSL2,VDR,SEMA4A,CSF1R,KIAA0319,RHOG,LIPA,LYPLA2,IST1,RAB10,FGR,NUMBL,FBXO45,MEF2A,FGD3,SPI1,SIPA1L1,KLF2,APP,CORO1A,PDLIM5,NF2,CYFIP1,KIF13B,SPAST,STK4,PSEN1,PDZD8,CUX1,ACTG1,UBB,ACTN1,RB1,PTPN6,CAP1,RTN4,SIDT2,CDK5R1,S100A6,WDR1,SRGAP2,MAPK14,HEXB,SLC30A1,MSN,EFNB2,ALD…
GO:BP	negative regulation of nucleobase-containing compound metabolic process	GO:0045934	FALSE	5.91E-66	65.2287	1529	3059	229	78724	SEMA4D,MAFG,NACC2,GSK3A,CCND3,CEBPA,MIER2,ASCL2,LOXL3,JDP2,CTNNB1,NRG1,RXRA,WWP2,DEAF1,AKIRIN2,BCL6,TSHZ3,FBXW11,HCLS1,NDFIP1,RCOR1,SLIRP,TFIP11,SRSF4,PLAGL1,KLF5,VDR,BMP2,MAPKAPK2,PARP10,HDAC5,ATF5,MAFB,KLF16,NACC1,ANKRD2,NFIL3,BACH1,TSPO,ATXN1L,CREBBP,MEF2A,CTNNBIP1,SPI1,NR6A1,SETDB1,PRKACA,SAP30,TLE4,PA2G4,CEBPB,KLF2,ZBTB45,MSH6,RUVBL2,SHC1,SAP30L,ZGLP1,NR1H3,NMNAT1,QKI,PSEN1,CUX1,PRDX5,ATXN1,…
GO:BP	regulation of protein localization	GO:0032880	FALSE	1.09E-65	64.9636	907	3059	174	78724	CTSD,GSK3A,NSFL1C,TRIM8,TYROBP,OS9,CTNNB1,WWP2,RPH3AL,OAZ2,HSPA1L,STX10,VPS26B,LCP1,HCLS1,NDFIP1,MAP4K4,PRKCD,TOR1A,C2CD2L,YWHAG,RHOG,SESN2,ASPH,PLEKHM2,CREBBP,JAK2,HMGCR,AKAP5,IL1B,SPI1,PTPN23,PRKACA,SLC25A22,NF2,TLR2,TMEM30A,UBXN2B,NR1H3,PINK1,OAZ1,ACSL3,PSEN1,ANG,LAMTOR1,PARP9,VCPIP1,DTX3L,CLN3,IRS2,KCNAB2,TYK2,RTN4,SIDT2,TRIM28,CDK5R1,GBP1,TRAF6,TRIM25,RAC2,CSK,MAPK14,RANGAP1,YWHAZ,VPS35,RNF3…
GO:BP	carboxylic acid metabolic process	GO:0019752	FALSE	1.23E-65	64.9092	887	3059	172	78724	CES1,NLRC4,HK2,HK3,SLC16A3,MPST,TST,CASP1,MGST2,STAR,PGD,MSRA,HSD3B7,PDK3,MGST3,AKR1A1,CEACAM1,GBA2,SYK,LIPA,MAPKAPK2,LYPLA2,SESN2,SLC7A7,PYCARD,SLC2A1,TBXAS1,HADHB,IL1B,PGM1,DEGS1,ARL2,PRKACA,SLC27A2,APP,AOAH,ALOXE3,PCBD1,TLR2,HSD17B4,ACOT8,NR1H3,ACSBG1,FOLR1,SCPEP1,QKI,ACSL3,PSEN1,HADHA,ACSS2,ACO1,MTHFD2,WDTC1,CBR1,CLN3,IRS2,SLC19A1,ACADVL,PLA2G15,ERLIN1,SLC2A3,EIF6,TPI1,PIPOX,OSBPL1A,SDSL,MAPK…
GO:BP	positive regulation of response to biotic stimulus	GO:0002833	FALSE	2.16E-65	64.6648	400	3059	118	78724	CYBA,NLRC4,EMILIN2,ZDHHC12,CASP1,TYROBP,TICAM1,FCN1,AKIRIN2,NLRP3,GRN,SMPDL3A,CTSS,MAP2K6,SLC15A3,TLR7,LAMP1,S100A8,YWHAG,VAV1,TLR8,SYK,MAPKAPK2,ECSIT,PYCARD,CREBBP,TLR5,BTK,SPI1,PVR,CLEC4E,SLC46A2,S100A9,CARD8,TLR2,LY86,ZCCHC3,HLA-F,PLSCR1,HLA-E,LTF,NR1H3,TLR1,RNF185,EIF2AK2,IRF1,PARP9,IRAK3,SLC19A1,ZDHHC3,RTN4,IFNK,CD274,TRAF6,SLC15A4,TRIM25,MYD88,RNF135,CD300LF,HSP90AA1,POLR3D,NAIP,NLRX1,TRIM5…
GO:BP	central nervous system development	GO:0007417	FALSE	2.26E-65	64.6464	1061	3059	188	78724	MTF1,B4GALT5,PTEN,CAPG,LOXL3,MPST,TYROBP,TNFRSF1B,AATK,CTNNB1,AKIRIN2,BCL6,FBXW11,DPCD,MAPK1,GRN,MAP1S,GPR17,CDKN2C,BMP2,CSF1R,UQCRQ,NCOA6,S100A8,GBA2,ATF5,MAFB,ATXN1L,NUMBL,SLC2A1,GNB4,IL1B,FBXO45,APP,S100A9,CLP1,OLIG1,NF2,TLR2,VPS4B,G6PD,STXBP3,SMAD1,QKI,STK4,PADI2,PSEN1,UBB,SLC38A2,ATXN1,MBOAT7,STK3,IRS2,KDM4A,INHBA,RTN4,CDK5R1,SPHK1,MYD88,APAF1,CSK,WDR1,SRGAP2,C5AR1,SRD5A1,NAPA,AKNA,NCOR2,SUF…
GO:BP	regulation of phosphorylation	GO:0042325	FALSE	2.67E-65	64.5742	830	3059	166	78724	MAP2K2,NCF1,SEMA4D,GSK3A,CCND3,PTEN,S100A12,MARK2,LILRA5,NRG1,MVP,SERTAD1,RIPK3,ARRB1,MAPK1,HCLS1,RAC1,CDKN2C,PRKCD,BMP2,APOA1,CSF1R,TLR7,CEACAM1,YWHAG,TLR8,SYK,OPRD1,GRB10,SESN2,TNFSF18,PYCARD,FGR,JAK2,IL1B,PDGFRB,PPP1R15B,APP,ZNF592,SMPD3,LRRK1,NF2,CAMKK2,PLAUR,EHD4,SLC8A1,LTF,JTB,MAP3K5,PIK3R5,PINK1,STK4,BAK1,PSEN1,ANG,PARP9,RB1,IRS2,IRAK3,PTPN6,RGS14,INHBA,CTDSP1,CDK5R1,SPHK1,TRAF6,HSPB1,C5AR…
GO:BP	regulation of leukocyte activation	GO:0002694	FALSE	4.32E-65	64.3642	576	3059	139	78724	LAPTM5,CEBPA,ASCL2,LOXL3,TYROBP,NFAM1,TNFRSF1B,FLOT2,TICAM1,CTNNB1,RIPK3,AKIRIN2,BCL6,NLRP3,SASH3,INPP5D,NDFIP1,GRN,SMARCD3,PGLYRP1,YWHAG,VAV1,SYK,TNFSF18,PYCARD,FGR,JAK2,BTK,IL1B,MMP8,SPI1,LGALS1,BATF,CEBPB,SLC46A2,CORO1A,BRD4,TBC1D10C,PLSCR1,HLA-E,NR1H3,TNFSF12,HLX,IRF1,JAK3,VAV3,BPI,IRS2,CLC,PTPN6,TYK2,INHBA,FGL2,CD274,SPHK1,TRAF6,SLC15A4,MYD88,RAC2,CSK,PRDX2,CST7,CD300LF,DUSP3,TNFAIP8L2,TNFRS…
GO:BP	enzyme-linked receptor protein signaling pathway	GO:0007167	FALSE	6.35E-65	64.1969	970	3059	179	78724	MAP2K2,CTSD,DOK1,GSK3A,ANKS1A,GAB1,HTRA3,CTNNB1,NRG1,RNF111,MVP,BLVRB,RAB7A,CD63,MAPK1,REPS2,GFRA3,EFNA4,RAC1,PRKCD,SHKBP1,BMP2,CSF1R,CEACAM1,VAV1,PTPRE,SYK,KIAA0319,GRB10,MAPKAPK2,UBASH3B,GRB2,ECSIT,PRKD2,ZC3H3,FGR,SORT1,PXN,CREBBP,JAK2,GNAI2,IL1B,PDGFRB,SIPA1L1,SAP30,DOK3,IGF2R,ZNF592,FUT7,SMPD3,DOK4,PLAUR,SHC1,SAP30L,CYFIP1,SMAD1,FOLR1,SH2B2,PSEN1,JAK3,IRS2,RGS14,TYK2,INHBA,RTN4,CDK5R1,HSPB1,P…
GO:BP	cellular homeostasis	GO:0019725	FALSE	6.71E-65	64.1732	835	3059	166	78724	CYBA,NCF1,TRPC6,HK2,HK3,UBE2S,ATP6V0E1,DIAPH1,RAB7A,RNASEK,MAPK1,NDFIP1,ATP6V0A1,GRN,MAP4K4,PDK3,SLC34A3,SLC9A1,VDR,C2CD2L,LAMP1,HERPUD1,UBASH3B,ASPH,CCL23,TBXAS1,GHITM,ATP6AP1,ATP6V1E1,PRDX6,PRKACA,SLC31A2,APP,SLC24A3,CORO1A,MT1F,EGLN1,CCDC22,SLC12A9,PRDX1,ARF1,SLC4A8,SLC8A1,STXBP3,FBXL5,PINK1,DMXL2,ATP1B3,BAK1,PSEN1,PDZD8,PRDX5,ABCC6,ACO1,WDTC1,CLN3,IRS2,PTPN6,PNPLA2,P2RX1,RTN4,SIDT2,ATP6V0D1,D…
GO:BP	monoatomic cation transmembrane transport	GO:0098655	FALSE	5.09E-64	63.293	877	3059	169	78724	ANO10,CYBA,NDUFB1,TRPC6,CACNA1E,NDUFS2,TMEM63B,TCN2,WWP2,ATP6V0E1,TESC,DIAPH1,RNASEK,CD63,SLC36A1,ATP6V0A1,SLC34A3,CTSS,SLC9A1,UQCR10,SLC15A3,NDUFB4,ORAI3,UBASH3B,ASPH,NDUFA1,GHITM,AKAP5,ATP6AP1,ATP6V1E1,PANX1,GNB2,PRKACA,SLC31A2,SLC25A22,SLC24A3,CORO1A,SLC12A9,SLC4A8,G6PD,SLC8A1,ATP1B3,BAK1,PSEN1,GPR35,SLC38A2,NDUFV2,NIPA2,NDUFC1,PTPN6,P2RX1,KCNAB2,KCNJ15,NDUFC2,SLC15A4,TCN1,ATP6V0D1,DDIT3,SLC9A…
GO:BP	response to bacterium	GO:0009617	FALSE	6.85E-64	63.1641	728	3059	154	78724	CYBA,NLRC4,EMILIN2,S100A12,TFEB,CASP1,UPF1,TNFRSF1B,MGST2,TICAM1,AKIRIN2,RAB7A,NLRP3,MAPK1,GRN,CD68,FOSL2,CAMP,PRKCD,PGLYRP1,BMP2,S100A8,SYK,MAPKAPK2,HP,FCER1G,GBP6,HDAC5,RBCK1,CFP,PYCARD,FGR,TSPO,JAK2,HADHB,TLR5,RNASE3,BTK,IL1B,MMP8,LCN2,CLEC4E,CARD16,CEBPB,S100A9,CARD8,FKBP5,SHARPIN,TLR2,LY86,SHC1,HLA-E,LTF,NR1H3,TLR1,SLPI,IFNAR1,DEFA4,NFKBIB,ANG,BPI,IRAK3,PAF1,CTR9,GBP1,CD274,TRAF6,MYD88,C5AR1…
GO:BP	positive regulation of innate immune response	GO:0045089	FALSE	9.14E-64	63.0389	374	3059	113	78724	CYBA,NLRC4,ZDHHC12,CASP1,TYROBP,TICAM1,FCN1,AKIRIN2,NLRP3,SMPDL3A,CTSS,MAP2K6,SLC15A3,TLR7,LAMP1,S100A8,VAV1,TLR8,SYK,MAPKAPK2,ECSIT,PYCARD,CREBBP,TLR5,BTK,SPI1,PVR,CLEC4E,SLC46A2,S100A9,CARD8,TLR2,ZCCHC3,HLA-F,PLSCR1,HLA-E,LTF,NR1H3,TLR1,RNF185,EIF2AK2,IRF1,PARP9,IRAK3,SLC19A1,ZDHHC3,RTN4,IFNK,CD274,TRAF6,SLC15A4,TRIM25,MYD88,RNF135,CD300LF,HSP90AA1,POLR3D,NAIP,NLRX1,TRIM5,GPR108,LY96,NLRP6,GPS2…
GO:BP	actin filament-based process	GO:0030029	FALSE	2.85E-63	62.5444	825	3059	163	78724	TWF2,F11R,CAPG,ARAP1,TYROBP,ARPC2,DIAPH1,BCL6,CDC42EP4,ARRB1,ARHGAP26,FLII,PSTPIP2,LCP1,HCLS1,MSRB2,DBN1,RAC1,RAB13,SLC9A1,PRKCD,TMSB10,APOA1,CSF1R,WAS,GBA2,RHOG,GRB2,PYCARD,PXN,JAK2,SVIL,ACAP2,MEF2A,FGD3,PDGFRB,SIPA1L1,CORO1A,PREX1,PDLIM2,PDLIM5,NF2,SHC1,ARF1,CYFIP1,PDLIM7,MYO1F,SMTN,QKI,SH2B2,ACTG1,ANG,CYTH2,ELMO2,FSCN1,ACTN1,CLN3,ARPC1A,CAP1,BRK1,CDK5R1,GMFG,MYADM,RAC2,WDR1,SRGAP2,KCNJ2,ACTR2,…
GO:BP	carbohydrate derivative metabolic process	GO:1901135	FALSE	3.14E-63	62.5035	983	3059	178	78724	NDUFB1,HK2,GSK3A,HK3,B4GALT5,NDUFS2,B3GALT4,CTNNB1,EXTL3,PGD,GTPBP1,FBXO6,GLA,GPD2,ASGR2,RPIA,CSGALNACT2,B3GNT8,FBXO27,MANBA,PRKCD,NDUFB4,PGLYRP1,BMP2,PFKFB4,AKR1A1,GBA2,HPSE,TKT,GM2A,LIPA,TM9SF2,NDUFA1,TSPO,MAN1A1,UPP1,BTK,IL1B,PGM1,CTBS,GNS,ARL2,PRKACA,APP,GMPR2,GBGT1,TJP2,AOAH,NT5C2,FUT7,SMPD3,G6PD,NMNAT1,PINK1,TALDO1,PSEN1,UGGT1,RNF185,MGAT1,NDUFV2,NDUFC1,ABCC6,GPAA1,HS6ST1,PIGO,GUSB,RBKS,PGL…
GO:BP	mononuclear cell differentiation	GO:1903131	FALSE	4.72E-63	62.3258	534	3059	132	78724	CEBPA,ASCL2,LOXL3,NFAM1,CTNNB1,RIPK3,BCL6,JMJD6,NLRP3,SASH3,HCLS1,INPP5D,NDFIP1,FOSL2,SMARCD3,PGLYRP1,SEMA4A,CSF1R,VAV1,SYK,LIPA,FCER1G,HDAC5,MAFB,NFIL3,BTK,IL1B,CTNNBIP1,SPI1,LGALS1,BATF,CLEC4E,CEBPB,APP,SLC46A2,PREX1,BRD4,FUT7,TLR2,HLX,QKI,BAK1,PSEN1,IRF1,JAK3,RB1,PTPN6,INHBA,IFNK,FGL2,TRAF6,MYD88,PRDX2,LILRB4,PPARG,EIF2AK1,LTBR,SHB,RC3H1,TCIRG1,CEBPE,GPS2,STAT5A,FES,MMP9,LYN,VSIR,FOXO3,SFRP1,R…
GO:BP	negative regulation of RNA metabolic process	GO:0051253	FALSE	5.46E-63	62.263	1400	3059	214	78724	SEMA4D,MAFG,NACC2,CCND3,CEBPA,MIER2,ASCL2,LOXL3,JDP2,CTNNB1,NRG1,RXRA,WWP2,DEAF1,AKIRIN2,BCL6,TSHZ3,FBXW11,HCLS1,RCOR1,SLIRP,SRSF4,PLAGL1,KLF5,VDR,BMP2,MAPKAPK2,PARP10,HDAC5,ATF5,MAFB,KLF16,NACC1,ANKRD2,NFIL3,BACH1,ATXN1L,CREBBP,MEF2A,CTNNBIP1,SPI1,NR6A1,SETDB1,SAP30,TLE4,PA2G4,CEBPB,KLF2,ZBTB45,RUVBL2,SHC1,SAP30L,ZGLP1,NR1H3,NMNAT1,QKI,PSEN1,CUX1,PRDX5,ATXN1,IRF1,PARP9,RB1,WDTC1,KDM4A,PAF1,TRIM2…
GO:BP	carbohydrate metabolic process	GO:0005975	FALSE	5.54E-63	62.2562	561	3059	135	78724	HK2,CHST15,GSK3A,HK3,B4GALT5,B3GALT4,SLC35A2,PGD,WIPI1,GLA,GPD2,PDK3,RPIA,MANBA,PFKFB4,AKR1A1,GBA2,GRB10,GM2A,LIPA,PPP1R3D,SESN2,ATG3,SLC2A1,MAN1A1,PGM1,GBE1,CTBS,ARL2,PRKACA,APP,GBGT1,FUT7,SMPD3,PHKG1,G6PD,GYG1,TALDO1,PSEN1,WDTC1,IRS2,GUSB,RBKS,PGLS,NAGA,SLC2A3,EIF6,GALK2,TPI1,GANAB,MAPK14,HEXB,COQ2,BRAT1,TPD52L2,ALDOA,ST3GAL6,NCOA2,CHST13,CRTC2,HIF1A,MGAM,PDK4,COMT,FBP1,PYGB,SLC25A11,GALK1,GAPD…
GO:BP	lipid biosynthetic process	GO:0008610	FALSE	5.79E-63	62.2374	729	3059	153	78724	AGPAT2,CES1,B4GALT5,PTEN,CYB5R3,B3GALT4,AGPAT3,SAMD8,STAR,MAPK1,INPP5D,HSD3B7,FAR2,ITPKC,PRKCD,BMP2,APOA1,CEACAM1,GBA2,LIPA,CDIPT,PRKD2,TM9SF2,PTDSS2,TSPO,HMGCR,TBXAS1,MTMR3,IL1B,DEGS1,PRKACA,SLC27A2,HSD17B11,GBGT1,ALOXE3,DGKG,PLSCR1,G6PD,NR1H3,ACSBG1,QKI,LBR,ACSL3,DHH,FIG4,ACSS2,MBOAT7,WDTC1,GPAA1,CBR1,CLN3,PIGO,PNPLA2,ACADVL,PLA2G15,P2RX1,ERLIN1,INHBA,EIF6,SPHK1,SRD5A1,DGAT1,AGPAT1,HEXB,ASAH1,C…
GO:BP	positive regulation of cell differentiation	GO:0045597	FALSE	2.74E-62	61.5625	879	3059	167	78724	MAP2K2,SEMA4D,TWF2,CEBPA,F11R,TYROBP,IFITM1,TNFRSF1B,CTNNB1,NRG1,TESC,BCL6,NLRP3,SASH3,HCLS1,INPP5D,RCOR1,CD101,DBN1,KLF5,ATP11A,VDR,SMARCD3,BMP2,CEACAM1,SYK,IST1,HMG20B,TSPO,NUMBL,JAK2,BTK,IL1B,CTNNBIP1,SPI1,PA2G4,CEBPB,SPINT1,BRD4,NF2,TLR2,LTF,CYFIP1,MAP3K5,HLX,SMAD1,QKI,STK4,CUX1,RB1,STK3,KDM4A,RGS14,INHBA,CEBPD,TRAF6,MAPK14,CMKLR1,SLC30A1,LILRB4,EFNB2,NEDD9,PPARG,PLXNA2,HIF1A,ZNF385A,SHB,CXCR…
GO:BP	neuron development	GO:0048666	FALSE	3.26E-62	61.487	1177	3059	194	78724	MAP2K2,SEMA4D,TWF2,GSK3A,B4GALT5,PTEN,ANKS1A,MARK2,CTNNB1,FKBP4,GRN,DBN1,GLA,MAP4K4,SCLT1,GFRA3,EFNA4,RAC1,MAP1S,RAB13,DIP2B,SEMA4A,TOR1A,CSF1R,UQCRQ,GBA2,KIAA0319,RHOG,LYPLA2,ATF5,IST1,RAB10,TSPO,NUMBL,JAK2,EFHD1,FBXO45,MEF2A,SIPA1L1,APP,S100A9,PREX1,DGKG,STYXL1,OLIG1,PDLIM5,TMEM30A,ARF4,CYFIP1,KREMEN1,ARSB,FOLR1,KIF13B,SPAST,PSEN1,CUX1,ACTG1,UBB,FIG4,RB1,HS6ST1,DENND5A,RTN4,CDK5R1,S100A6,SRGAP2…
GO:BP	inorganic ion transmembrane transport	GO:0098660	FALSE	3.52E-62	61.4532	944	3059	173	78724	ANO10,CYBA,NDUFB1,TRPC6,CACNA1E,NDUFS2,TCN2,CLCN4,WWP2,ATP6V0E1,TESC,DIAPH1,RNASEK,CD63,SLC36A1,ATP6V0A1,APOL1,SLC34A3,SLC9A1,UQCR10,VDR,SLC15A3,NDUFB4,ORAI3,UBASH3B,ASPH,NDUFA1,GHITM,AKAP5,ATP6AP1,ATP6V1E1,PANX1,GNB2,PRKACA,SLC31A2,SLC25A22,SLC24A3,CORO1A,SLC12A9,SLC4A8,G6PD,SLC8A1,ATP1B3,BAK1,PSEN1,GPR35,SLC38A2,NDUFV2,NIPA2,NDUFC1,PTPN6,P2RX1,KCNAB2,KCNJ15,NDUFC2,SLC15A4,TCN1,ATP6V0D1,DDIT3,SL…
GO:BP	regulation of protein phosphorylation	GO:0001932	FALSE	4.28E-62	61.3685	779	3059	157	78724	MAP2K2,NCF1,SEMA4D,GSK3A,CCND3,PTEN,S100A12,MARK2,LILRA5,NRG1,MVP,SERTAD1,RIPK3,ARRB1,MAPK1,HCLS1,RAC1,CDKN2C,PRKCD,BMP2,APOA1,CSF1R,TLR7,CEACAM1,YWHAG,TLR8,SYK,OPRD1,SESN2,TNFSF18,PYCARD,FGR,JAK2,IL1B,PDGFRB,PPP1R15B,APP,ZNF592,SMPD3,LRRK1,NF2,CAMKK2,PLAUR,EHD4,SLC8A1,LTF,JTB,MAP3K5,PIK3R5,PINK1,STK4,BAK1,PSEN1,PARP9,RB1,IRAK3,PTPN6,RGS14,CTDSP1,CDK5R1,SPHK1,TRAF6,HSPB1,C5AR1,TADA3,BRAT1,DUSP3,H…
GO:BP	regulation of anatomical structure morphogenesis	GO:0022603	FALSE	5.36E-62	61.2711	831	3059	162	78724	MAP2K2,SEMA4D,TWF2,HK2,EMILIN2,PTEN,F11R,MARK2,ARAP1,GAB1,CTNNB1,DIAPH1,BCL6,CDC42EP4,GRN,DBN1,GLA,RAC1,DIP2B,CAMP,BMP2,SEMA4A,CSF1R,CEACAM1,KIAA0319,RHOG,IST1,PRKD2,EPN1,FGR,CCM2,C3AR1,IL1B,FGD3,SIPA1L1,KLF2,CORO1A,EGLN1,PDLIM5,NF2,SHC1,CYFIP1,TNFSF12,SMAD1,QKI,KIF13B,PINK1,PSEN1,PDZD8,CUX1,APCDD1,PTPN6,RTN4,CDK5R1,SPHK1,HSPB1,RLN2,WDR1,C5AR1,HEXB,BRCA1,RHOB,VPS35,SLC30A1,MSN,EFNB2,ALDOA,PPARG,P…
GO:BP	intracellular protein transport	GO:0006886	FALSE	1.20E-61	60.9193	686	3059	147	78724	VPS37B,RAB5C,LAPTM5,RANBP3,COPA,AP1B1,RAB32,OS9,TIMM17B,RPH3AL,OAZ2,AKIRIN2,RAB7A,STX10,VPS26B,LCP1,HCLS1,RAB24,PRKCD,NUP214,TMED1,SYK,RAB3GAP2,STXBP2,HERPUD1,AP2S1,VPS37C,ASPH,SORT1,JAK2,SNX27,TECPR2,AKAP5,ATP6AP1,IL1B,PTPN23,CLTA,XPO5,SYTL3,PRKACA,TMEM30A,PTTG1IP,ARF1,ARF4,CTSA,VPS39,STXBP3,KIF13A,OAZ1,STK4,PSEN1,PPP1R10,STK3,TRIM28,HSPB1,VPS16,STAM2,CACNG8,MAPK14,SAMM50,EHD1,NAPA,RANGAP1,RHOB,…
GO:BP	supramolecular fiber organization	GO:0097435	FALSE	2.76E-61	60.5593	861	3059	164	78724	TWF2,F11R,CAPG,ARAP1,LOXL3,ARPC2,FKBP4,RIPK3,DIAPH1,CDC42EP4,ARRB1,FLII,PSTPIP2,LCP1,HCLS1,MSRB2,DBN1,RAC1,MAP1S,SLC9A1,CAMP,PRKCD,TMSB10,APOA1,WAS,GBA2,CLIP1,RHOG,GRB2,AGFG1,PYCARD,PXN,JAK2,SVIL,MEF2A,CCDC13,PDGFRB,ARL2,HAUS4,APP,CORO1A,PREX1,NF2,ARF1,CYFIP1,MYO1F,SPAST,PSEN1,ACTG1,ANG,ELMO2,FSCN1,ACTN1,RB1,CHADL,ARPC1A,CAP1,BRK1,CDK5R1,GMFG,MYADM,RAC2,WDR1,ACTR2,RHOB,NEDD1,NEDD9,ALDOA,MEGF9,PLO…
GO:BP	apoptotic signaling pathway	GO:0097190	FALSE	3.30E-61	60.4812	606	3059	138	78724	NACC2,GSK3A,SHISA5,TNFRSF1B,TICAM1,CTNNB1,NRG1,RIPK3,CTSS,TNFRSF12A,PRKCD,S100A8,HERPUD1,RBCK1,PYCARD,SORT1,JAK2,GHITM,GNAI2,BTK,IL1B,SPI1,IFI27L2,CEBPB,S100A9,STYXL1,MSH6,PTTG1IP,PLAUR,TNFSF12,MAP3K5,PINK1,STK4,BAK1,TRAF7,PSEN1,UBB,RB1,STK3,INHBA,ZDHHC3,HSPB1,APAF1,DDIT3,RAD9A,PRDX2,BRCA1,GABARAP,P4HB,PPARG,RFFL,HIF1A,LTBR,ZNF385A,NANOS3,DAP3,SP1,CASP9,TMBIM1,TFPT,MMP9,MUL1,HIPK1,SIAH2,SGPL1,PDP…
GO:BP	inorganic cation transmembrane transport	GO:0098662	FALSE	5.00E-61	60.3008	854	3059	163	78724	CYBA,NDUFB1,TRPC6,CACNA1E,NDUFS2,TCN2,WWP2,ATP6V0E1,TESC,DIAPH1,RNASEK,CD63,SLC36A1,ATP6V0A1,SLC34A3,SLC9A1,UQCR10,SLC15A3,NDUFB4,ORAI3,UBASH3B,ASPH,NDUFA1,GHITM,AKAP5,ATP6AP1,ATP6V1E1,PANX1,GNB2,PRKACA,SLC31A2,SLC25A22,SLC24A3,CORO1A,SLC12A9,SLC4A8,G6PD,SLC8A1,ATP1B3,BAK1,PSEN1,GPR35,SLC38A2,NDUFV2,NIPA2,NDUFC1,PTPN6,P2RX1,KCNAB2,KCNJ15,NDUFC2,SLC15A4,TCN1,ATP6V0D1,DDIT3,SLC9A8,CNNM4,CACNG8,SLC3…
GO:BP	negative regulation of immune system process	GO:0002683	FALSE	1.93E-60	59.715	515	3059	127	78724	RIN3,LAPTM5,CEBPA,ASCL2,ZDHHC12,LOXL3,TYROBP,CTNNB1,BCL6,INPP5D,NDFIP1,GRN,GPR17,CD68,SMPDL3A,PGLYRP1,APOA1,CR1L,CEACAM1,SYK,MAFB,UBASH3B,FGR,BTK,SPI1,LGALS1,CEBPB,CARD8,TRAFD1,EIF4E2,TBC1D10C,HLA-F,HLA-E,LTF,NR1H3,HLX,QKI,PADI2,IRF1,CEP63,JAK3,BPI,IRAK3,PTPN6,INHBA,FGL2,GBP1,CD274,PRDX2,MAPK14,CST7,CD300LF,YWHAZ,DUSP3,TNFAIP8L2,TNFRSF14,LILRB4,HLA-A,NLRX1,PPARG,GPR108,RC3H1,NLRP6,GPS2,STAT5A,CD3…
GO:BP	negative regulation of programmed cell death	GO:0043069	FALSE	2.25E-60	59.6475	905	3059	167	78724	SEMA4D,LAPTM5,CTNNB1,NRG1,BCL6,HCLS1,DNAJC5,GRN,MAP4K4,SLC9A1,PRKCD,CSF1R,AKR1A1,HERPUD1,RNF144B,ATF5,RBCK1,TNFSF18,JAK2,GHITM,GNAI2,IL1B,GBE1,PA2G4,CEBPB,SLC46A2,CORO1A,MAEA,PTTG1IP,PLAUR,SHC1,ARF4,LTF,NMNAT1,PINK1,ANXA4,BAK1,PSEN1,ANXA5,PRDX5,EIF2AK2,MIEN1,PPP1R10,JAK3,RB1,CLN3,IRS2,CPEB4,SPHK1,HSPB1,PRDX2,SLC40A1,CEACAM6,BRCA1,YWHAZ,RNF31,NAIP,RFFL,FSTL1,HIF1A,ZNF385A,NANOS3,PLAC8,PDK4,PROK2,B…
GO:BP	positive regulation of programmed cell death	GO:0043068	FALSE	5.73E-60	59.2419	546	3059	130	78724	CTSD,NLRC4,LAPTM5,NACC2,EMILIN2,TNFRSF1B,CTNNB1,RIPK3,BCL6,INPP5D,GRN,CTSS,TNFRSF12A,SLC9A1,MAP2K6,VDR,PRKCD,BMP2,TEX261,S100A8,SYK,RBCK1,PYCARD,TSPO,JAK2,SRPK2,LGALS1,S100A9,TNFRSF8,IGF2R,STYXL1,MFN2,TNFSF12,MAP3K5,STK4,BAK1,TRAF7,PSEN1,UBB,STK3,INHBA,CDK5R1,CD274,APAF1,DDIT3,RAD9A,RHOB,PPARG,E2F3,LTBR,SP1,DUSP6,CASP9,EIF2B5,TFPT,MMP9,CTNNBL1,LYN,FOXO3,TGFBR1,MAP3K11,IP6K2,SFRP1,DAPK3,GSN,ATF6,D…
GO:BP	peptidyl-amino acid modification	GO:0018193	FALSE	5.90E-60	59.2292	686	3059	145	78724	MAP2K2,NCF1,SEMA4D,GSK3A,LMTK2,PTEN,MARK2,ZDHHC12,LOXL3,LILRA5,CTNNB1,NRG1,MVP,JMJD6,MAPK1,HCLS1,PDK3,DIP2B,PRKCD,APOA1,CSF1R,S100A8,SYK,OPRD1,MAPKAPK2,PRKD2,HMG20B,ASPH,TNFSF18,TOLLIP,FGR,CREBBP,JAK2,SRPK2,BTK,PDGFRB,PRKACA,APP,S100A9,ZNF592,NAA60,LRRK1,NF2,QPCT,EHD4,PINK1,STK4,BAK1,PSEN1,PARP9,HMBS,JAK3,PTPN6,GGCX,ZDHHC3,TRIM28,CDK5R1,SPHK1,ZDHHC19,MAPK14,RANGAP1,TPST1,TNFRSF14,LILRB4,NEDD9,P4H…
GO:BP	tube morphogenesis	GO:0035239	FALSE	6.01E-60	59.2215	879	3059	164	78724	HK2,EMILIN2,GAB1,CTNNB1,DEAF1,JMJD6,GRN,KLF5,TNFRSF12A,CAMP,VDR,BMP2,SEMA4A,CSF1R,CEACAM1,HPSE,SYK,HDAC5,PRKD2,EPN1,SRPK2,CCM2,C3AR1,IL1B,CTNNBIP1,MAP3K3,PDGFRB,PRKACA,KLF2,HIF3A,SPINT1,EGLN1,SHC1,TGFBI,VPS4B,TNFSF12,COL8A2,HLX,SMAD1,FOLR1,QKI,STK4,BAK1,PSEN1,ACTG1,ANG,VAV3,STK3,HS6ST1,AAMP,PTPN6,RTN4,SPHK1,TRAF6,HSPB1,RLN2,APAF1,C5AR1,MAPK14,BRCA1,YWHAZ,RHOB,EFNB2,BSG,SUFU,PPARG,WNT6,PKD1,SLC12A…
GO:BP	actin cytoskeleton organization	GO:0030036	FALSE	1.22E-59	58.9148	729	3059	149	78724	TWF2,F11R,CAPG,ARAP1,TYROBP,ARPC2,DIAPH1,BCL6,CDC42EP4,ARRB1,ARHGAP26,FLII,PSTPIP2,LCP1,HCLS1,MSRB2,DBN1,RAC1,RAB13,SLC9A1,PRKCD,TMSB10,APOA1,CSF1R,WAS,GBA2,RHOG,GRB2,PYCARD,PXN,JAK2,SVIL,MEF2A,FGD3,PDGFRB,SIPA1L1,CORO1A,PREX1,PDLIM2,PDLIM5,NF2,SHC1,ARF1,CYFIP1,PDLIM7,MYO1F,SMTN,SH2B2,ACTG1,ANG,CYTH2,ELMO2,FSCN1,ACTN1,CLN3,ARPC1A,CAP1,BRK1,CDK5R1,GMFG,MYADM,RAC2,WDR1,ACTR2,CXCL1,RHOB,NEDD9,ALDOA,…
GO:BP	positive regulation of cell population proliferation	GO:0008284	FALSE	3.36E-59	58.474	954	3059	170	78724	PTEN,TICAM1,CTNNB1,NRG1,SERTAD1,EXTL3,AKIRIN2,BCL6,SASH3,MAPK1,HCLS1,GRN,IL13RA1,FOSL2,CAMP,SMARCD3,BMP2,CSF1R,HPSE,SYK,RHOG,NACC1,PRKD2,PYCARD,TSPO,ATXN1L,JAK2,SRPK2,GNAI2,BTK,IL1B,MAP3K3,PDGFRB,CORO1A,CSF2RA,SMPD3,SHC1,MFN2,HLA-E,LTF,TNFSF12,MAP3K5,HLX,ANG,VAV3,IRS2,PTPN6,BRK1,TYK2,RTN4,S100A6,CD274,SPHK1,TRAF6,MYD88,RAC2,C5AR1,MAPK14,CEACAM6,FZR1,HLA-A,EFNB2,CCPG1,CNOT8,CNBP,E2F3,HIF1A,PLAC8,F…
GO:BP	negative regulation of DNA-templated transcription	GO:0045892	FALSE	6.78E-59	58.1689	1280	3059	198	78724	SEMA4D,MAFG,NACC2,CCND3,CEBPA,MIER2,ASCL2,LOXL3,JDP2,CTNNB1,NRG1,RXRA,WWP2,DEAF1,AKIRIN2,BCL6,TSHZ3,FBXW11,HCLS1,RCOR1,PLAGL1,KLF5,VDR,BMP2,PARP10,HDAC5,ATF5,MAFB,KLF16,NACC1,ANKRD2,NFIL3,BACH1,ATXN1L,CREBBP,MEF2A,CTNNBIP1,SPI1,NR6A1,SAP30,TLE4,PA2G4,CEBPB,KLF2,ZBTB45,RUVBL2,SHC1,SAP30L,ZGLP1,NR1H3,NMNAT1,PSEN1,CUX1,PRDX5,ATXN1,IRF1,PARP9,RB1,WDTC1,KDM4A,PAF1,TRIM28,CDK5R1,MXD3,CEBPD,CTR9,TRAF6,H…
GO:BP	negative regulation of apoptotic process	GO:0043066	FALSE	9.13E-59	58.0394	874	3059	162	78724	SEMA4D,CTNNB1,NRG1,BCL6,HCLS1,DNAJC5,GRN,MAP4K4,SLC9A1,PRKCD,CSF1R,AKR1A1,HERPUD1,RNF144B,ATF5,TNFSF18,JAK2,GHITM,GNAI2,IL1B,GBE1,PA2G4,CEBPB,SLC46A2,CORO1A,MAEA,PTTG1IP,PLAUR,SHC1,ARF4,LTF,NMNAT1,PINK1,ANXA4,BAK1,PSEN1,ANXA5,PRDX5,EIF2AK2,MIEN1,PPP1R10,JAK3,RB1,CLN3,IRS2,CPEB4,SPHK1,HSPB1,PRDX2,SLC40A1,CEACAM6,BRCA1,YWHAZ,NAIP,RFFL,FSTL1,HIF1A,ZNF385A,NANOS3,PLAC8,PDK4,PROK2,BNIP2,CBS,INSL3,TMBI…
GO:BP	negative regulation of RNA biosynthetic process	GO:1902679	FALSE	1.14E-58	57.9444	1296	3059	199	78724	SEMA4D,MAFG,NACC2,CCND3,CEBPA,MIER2,ASCL2,LOXL3,JDP2,CTNNB1,NRG1,RXRA,WWP2,DEAF1,AKIRIN2,BCL6,TSHZ3,FBXW11,HCLS1,RCOR1,PLAGL1,KLF5,VDR,BMP2,PARP10,HDAC5,ATF5,MAFB,KLF16,NACC1,ANKRD2,NFIL3,BACH1,ATXN1L,CREBBP,MEF2A,CTNNBIP1,SPI1,NR6A1,SETDB1,SAP30,TLE4,PA2G4,CEBPB,KLF2,ZBTB45,RUVBL2,SHC1,SAP30L,ZGLP1,NR1H3,NMNAT1,PSEN1,CUX1,PRDX5,ATXN1,IRF1,PARP9,RB1,WDTC1,KDM4A,PAF1,TRIM28,CDK5R1,MXD3,CEBPD,CTR9,…
GO:BP	regulation of inflammatory response	GO:0050727	FALSE	1.47E-58	57.8331	390	3059	110	78724	NCF1,NLRC4,CEBPA,S100A12,ELF4,CASP1,LILRA5,TNFRSF1B,MGST2,EXTL3,BCL6,NLRP3,IL17RA,NDFIP1,GRN,GPR17,F12,PRKCD,PGLYRP1,APOA1,TLR7,S100A8,SYK,PYCARD,FGR,JAK2,BTK,IL1B,MMP8,LGALS1,CARD16,CEBPB,APP,S100A9,SHARPIN,AOAH,BRD4,FUT7,TLR2,HLA-E,NR1H3,RB1,PTPN6,GBP1,SPHK1,MYD88,MAPK14,CST7,AKNA,VPS35,TNFAIP8L2,SUCNR1,NAIP,NLRX1,PPARG,NLRP6,GPS2,VAMP8,PIK3AP1,MMP9,MGLL,LYN,NLRP12,TMSB4X,ALOX5,HCK,TEK,ZDHHC5,G…
GO:BP	regulation of cell cycle	GO:0051726	FALSE	1.56E-58	57.8068	1087	3059	181	78724	MIIP,NSFL1C,CCND3,CEBPA,PTEN,ANAPC11,SIPA1,CTNNB1,BCL6,FBXO6,RAD23A,GNB1L,CDKN2C,PLAGL1,MAP2K6,SMARCD3,CETN2,NUP214,BMP2,AURKAIP1,ATF5,SRPK2,SVIL,IL1B,CHMP4B,CHMP2A,PDGFRB,PRKACA,PSME1,APP,CHMP1A,MAEA,BRD4,SMPD3,NF2,RUVBL2,UBXN2B,VPS4B,NUSAP1,PLSCR1,KIF13A,PSME2,SPAST,BOP1,BAK1,IRF1,PARP9,PPP1R10,CEP63,INO80C,DTX3L,RB1,PTPN6,INHBA,PAF1,CTDSP1,SPHK1,KLHL18,DDIT3,RAD9A,MAPK14,TADA3,BRCA1,FZR1,RHOB,…
GO:BP	regulation of immune effector process	GO:0002697	FALSE	3.55E-58	57.4494	401	3059	111	78724	NCF1,LAPTM5,ASCL2,LOXL3,TYROBP,TNFRSF1B,TICAM1,FCN1,RIPK3,BCL6,NLRP3,SASH3,NDFIP1,GRN,UNC13D,PGLYRP1,SECTM1,APOA1,TLR7,WAS,LAMP1,CR1L,CEACAM1,YWHAG,VAV1,SYK,STXBP2,MAPKAPK2,CFP,PYCARD,FGR,BTK,IL1B,PANX1,SPI1,LGALS1,BATF,PVR,S100A9,BRD4,FUT7,HLA-F,HLA-E,TNFSF12,HLX,JAK3,PRAM1,CLC,IRAK3,PTPN6,RTN4,FGL2,CD274,TRAF6,SLC15A4,MYD88,RAC2,TNFRSF14,LILRB4,HLA-A,NLRX1,ITGB2,SHB,RC3H1,STAT5A,VAMP8,FES,GAB2,…
GO:BP	myeloid cell differentiation	GO:0030099	FALSE	4.89E-58	57.3104	443	3059	116	78724	CEBPA,TYROBP,CTNNB1,TESC,BLVRB,BCL6,JMJD6,HCLS1,INPP5D,NDFIP1,RCOR1,CD101,SLC1A5,DNASE2,FOSL2,BMP2,CSF1R,NCOA6,CEACAM1,LIPA,MAFB,UBASH3B,FLI1,ALAS1,JAK2,OSCAR,ATP6AP1,CTNNBIP1,SPI1,BATF,CEBPB,KLF2,APP,MAEA,LRRK1,TLR2,G6PD,LTF,QKI,LBR,PSEN1,ACTN1,RB1,PTPN6,INHBA,PAF1,CTR9,EIF6,TRAF6,MYD88,RAC2,WDR1,MAPK14,LILRB4,NEDD9,PPARG,EIF2AK1,HIF1A,LTBR,ZNF385A,TCIRG1,CEBPE,CASP9,STAT5A,FES,EPAS1,GAB2,MMP9,L…
GO:BP	modification-dependent protein catabolic process	GO:0019941	FALSE	2.13E-57	56.6713	638	3059	137	78724	VPS37B,LAPTM5,GSK3A,NSFL1C,CEBPA,PTEN,ANAPC11,UBE2S,KLHL8,OS9,CTNNB1,RNF111,WWP2,AKIRIN2,ARRB1,ARRDC1,FBXO6,RAD23A,FBXW11,NDFIP1,DCAF11,FBXO27,UBA52,HERPUD1,RNF144B,VPS37C,RBCK1,TOLLIP,CHMP4B,FBXO45,CHMP2A,PTPN23,PSMD13,SHARPIN,CHMP1A,MAEA,KCTD5,CCDC22,UBXN2B,VPS4B,QRICH2,FBXL5,PINK1,PSMD2,TRAF7,PSEN1,RNF185,UBB,DTX3L,UBE2H,PSMD4,TRIM28,TRIM25,UBC,DDIT3,TBL1X,STAM2,FZR1,UBE2A,SUFU,GABARAP,RFFL,RN…
GO:BP	negative regulation of gene expression	GO:0010629	FALSE	4.68E-57	56.3301	1680	3059	227	78724	LAPTM5,RNASEL,ELF4,UPF1,LILRA5,TYROBP,FLOT2,CTNNB1,WWP2,EXTL3,AKIRIN2,BCL6,ARRB1,GTPBP1,INPP5D,NDFIP1,RCOR1,HOMER3,RAC1,SMG5,SRSF4,PRKCD,PGLYRP1,BMP2,APOA1,CEACAM1,TLR8,OPRD1,MAPKAPK2,PARP10,HDAC5,SESN2,TDRD9,PCGF3,PYCARD,TSPO,BTK,SPI1,SETDB1,XPO5,PRKACA,CARD16,TDRD7,KLF2,APP,SLC24A3,CARD8,CLP1,CHMP1A,EIF4E2,HLA-F,LTF,CYFIP1,SMAD1,QKI,LBR,PINK1,ANXA4,EXOSC4,BAK1,PSEN1,ANG,EIF2AK2,PARP9,JAK3,ACO1,…
GO:BP	modification-dependent macromolecule catabolic process	GO:0043632	FALSE	5.87E-57	56.2313	643	3059	137	78724	VPS37B,LAPTM5,GSK3A,NSFL1C,CEBPA,PTEN,ANAPC11,UBE2S,KLHL8,OS9,CTNNB1,RNF111,WWP2,AKIRIN2,ARRB1,ARRDC1,FBXO6,RAD23A,FBXW11,NDFIP1,DCAF11,FBXO27,UBA52,HERPUD1,RNF144B,VPS37C,RBCK1,TOLLIP,CHMP4B,FBXO45,CHMP2A,PTPN23,PSMD13,SHARPIN,CHMP1A,MAEA,KCTD5,CCDC22,UBXN2B,VPS4B,QRICH2,FBXL5,PINK1,PSMD2,TRAF7,PSEN1,RNF185,UBB,DTX3L,UBE2H,PSMD4,TRIM28,TRIM25,UBC,DDIT3,TBL1X,STAM2,FZR1,UBE2A,SUFU,GABARAP,RFFL,RN…
GO:BP	reproductive process	GO:0022414	FALSE	9.14E-57	56.0389	1608	3059	221	78724	TRPC6,CTSB,GSK3A,PTEN,ANAPC11,ASCL2,RETN,CTNNB1,FKBP4,DEAF1,BCL6,HSPA1L,APOL2,SLCO4C1,FBXW11,DPCD,SRPK1,RAB13,SLIRP,MAP2K6,LHFPL2,VDR,CETN2,AGFG1,TDRD9,EPN1,PCSK5,SLC2A1,TLR5,IL1B,PANX1,NR6A1,PRKACA,TDRD7,CEBPB,APP,PSMD13,IGF2R,FUT7,MSH6,HSD17B4,ZGLP1,SLC2A14,PSAP,QRICH2,RMI1,SMAD1,FOLR1,QKI,STK4,BAK1,DHH,UBB,ANG,SLC38A2,RB1,STK3,SBF1,SLC19A1,P2RX1,INHBA,TRIM28,SPACDR,PRR19,SLC22A16,RLN2,SLC9A8,S…
GO:BP	negative regulation of developmental process	GO:0051093	FALSE	1.08E-56	55.9656	925	3059	164	78724	SEMA4D,GSK3A,CEBPA,PTEN,DYNLT1,ASCL2,LOXL3,JDP2,CTNNB1,EXTL3,BCL6,MAPK1,INPP5D,NDFIP1,MAP4K4,DIP2B,PGLYRP1,BMP2,SEMA4A,CEACAM1,KIAA0319,HDAC5,MAFB,UBASH3B,ANKRD2,EPN1,TSPO,SORT1,IL1B,SPI1,LGALS1,SAP30,KLF2,APP,NF2,TLR2,SHC1,SAP30L,G6PD,ESRRB,LTF,NR1H3,KREMEN1,HLX,SMAD1,QKI,PINK1,STK4,PSEN1,IRF1,CXCL14,JAK3,RB1,CHADL,STK3,PTPN6,KDM4A,INHBA,PAF1,RTN4,CTDSP1,FGL2,CTR9,DDIT3,PRDX2,NBR1,LILRB4,SUFU,PP…
GO:BP	protein localization to organelle	GO:0033365	FALSE	3.98E-56	55.3997	1209	3059	188	78724	NDUFB1,VPS37B,LAPTM5,HK2,GSK3A,NSFL1C,TRIM8,OS9,TIMM17B,TSPAN17,AKIRIN2,DIAPH1,RAB7A,HSPA1L,VPS26B,HCLS1,CD68,PRKCD,NUP214,TOR1A,LAMP1,SYK,RAB3GAP2,HERPUD1,BANP,VPS37C,SESN2,RAB10,TOLLIP,TSPO,SORT1,CREBBP,JAK2,MAN1A1,CHMP4B,SPI1,PTPN23,NEURL3,ARL2,PRKACA,NF2,TMEM30A,RUVBL2,PTTG1IP,UBXN2B,ARF4,MFN2,PINK1,DCTN2,STK4,PSEN1,LAMTOR1,PARP9,VCPIP1,PPP1R10,DTX3L,RB1,STK3,GPAA1,ARL8B,TYK2,PAF1,ZDHHC3,RTN4…
GO:BP	mitotic cell cycle	GO:0000278	FALSE	5.81E-56	55.2358	892	3059	160	78724	MIIP,KLHDC8B,NSFL1C,CCND3,PTEN,DYNLT1,ANAPC11,NEK4,UBE2S,EXOC3,CTNNB1,BCL6,FBXW11,MAP1S,CDKN2C,SMARCD3,CETN2,CLIP1,AURKAIP1,LIPA,REEP4,MTMR3,IL1B,CHMP4B,CHMP2A,PDGFRB,PSME1,APP,PHF13,CENPK,CHMP1A,MAEA,BRD4,SMPD3,UBXN2B,ARF1,VPS4B,NUSAP1,JTB,DCTN2,PSME2,SPAST,PPP1R10,RB1,DCTN3,PTPN6,RGS14,INHBA,CTDSP1,SPHK1,KLHL18,RAD9A,INSC,TADA3,BRCA1,FZR1,UBE2A,RHOB,DUSP3,NEDD1,PPP1R12A,E2F3,PPM1D,PKD1,SHB,CCNI…
GO:BP	epithelium development	GO:0060429	FALSE	7.66E-56	55.116	1238	3059	190	78724	MAP2K2,MAFG,CES1,CTSB,GSK3A,CEBPA,PTEN,F11R,LOXL3,TST,SIPA1,CTNNB1,NRG1,EXTL3,DEAF1,MAPK1,RAB13,KLF5,FOSL2,VDR,ITPK1,BMP2,TOR1A,CSF1R,CEACAM1,HPSE,LIPA,MAFB,GRB2,CD151,PRKD2,RAB10,TOLLIP,JAK2,CCM2,IL1B,CTNNBIP1,PRKACA,TDRD7,CEBPB,KLF2,TJP2,SHARPIN,SPINT1,ALOXE3,NF2,HSD17B4,PSAP,SMAD1,FOLR1,STK4,ANXA4,PSEN1,ACTG1,APCDD1,CEP63,STK3,CBR1,ACADVL,INHBA,RTN4,SIDT2,TRIM28,MYADM,TRAF6,MYD88,APAF1,WDR1,SL…
GO:BP	regulation of lymphocyte activation	GO:0051249	FALSE	1.43E-55	54.8458	509	3059	121	78724	LAPTM5,ASCL2,LOXL3,TYROBP,NFAM1,TNFRSF1B,FLOT2,TICAM1,CTNNB1,RIPK3,AKIRIN2,BCL6,NLRP3,SASH3,INPP5D,NDFIP1,SMARCD3,PGLYRP1,YWHAG,VAV1,SYK,TNFSF18,PYCARD,FGR,JAK2,BTK,IL1B,SPI1,LGALS1,BATF,CEBPB,SLC46A2,CORO1A,BRD4,TBC1D10C,HLA-E,TNFSF12,HLX,IRF1,JAK3,VAV3,IRS2,CLC,PTPN6,TYK2,INHBA,FGL2,CD274,TRAF6,SLC15A4,MYD88,RAC2,CSK,PRDX2,DUSP3,TNFAIP8L2,TNFRSF14,LILRB4,HLA-A,EFNB2,NEDD9,SHB,RC3H1,STAT5A,TNFSF…
GO:BP	intracellular chemical homeostasis	GO:0055082	FALSE	1.71E-55	54.7681	730	3059	144	78724	CYBA,NCF1,TRPC6,HK2,HK3,ATP6V0E1,DIAPH1,RAB7A,RNASEK,MAPK1,NDFIP1,ATP6V0A1,GRN,MAP4K4,PDK3,SLC34A3,SLC9A1,VDR,C2CD2L,LAMP1,HERPUD1,UBASH3B,ASPH,CCL23,TBXAS1,GHITM,ATP6AP1,PRKACA,SLC31A2,APP,SLC24A3,CORO1A,MT1F,EGLN1,CCDC22,ARF1,SLC4A8,SLC8A1,STXBP3,FBXL5,DMXL2,ATP1B3,BAK1,PSEN1,PDZD8,ABCC6,ACO1,WDTC1,CLN3,IRS2,PTPN6,PNPLA2,P2RX1,RTN4,SIDT2,ATP6V0D1,DDIT3,SLC9A8,CNNM4,SLC40A1,HEXB,KCNJ2,STEAP4,SLC…
GO:BP	negative regulation of cellular component organization	GO:0051129	FALSE	2.17E-55	54.6629	701	3059	141	78724	RIN3,TWF2,PTEN,F11R,CAPG,ARAP1,ZDHHC12,DYSF,TNFRSF1B,FKBP4,RAB7A,JMJD6,FLII,MAP4K4,RAC1,TFIP11,DIP2B,PRKCD,APOA1,WAS,KIAA0319,OPRD1,AURKAIP1,ANKRD13D,MCTP1,ATG3,GHITM,SVIL,IL1B,CTNNBIP1,CARD8,CORO1A,STYXL1,TLR2,PLSCR1,NR1H3,KREMEN1,PINK1,BAK1,PSEN1,CHADL,LRPAP1,IRAK3,DENND5A,PHF23,RTN4,GMFG,MYADM,PHF2,CSK,BRCA1,CD300LF,VPS35,EFNB2,XRN1,PPARG,PACSIN2,NUBP1,USP10,DNAJB6,HNRNPC,MAP4,SPTB,PICK1,CD300…
GO:BP	cellular response to lipid	GO:0071396	FALSE	2.29E-55	54.6396	613	3059	132	78724	NCF1,TWF2,CES1,GSK3A,CASP1,UPF1,TNFRSF1B,TICAM1,MGST1,RXRA,FKBP4,TESC,NLRP3,MAPK1,PDK3,CD68,CAMP,VDR,PRKCD,SYK,HDAC5,PYCARD,TSPO,JAK2,HADHB,TLR5,IL1B,MMP8,CARD16,CARD8,TLR2,LY86,RUVBL2,ESRRB,LTF,NR1H3,DEFA4,GNB1,PADI2,NFKBIB,SAFB,BPI,IRAK3,INHBA,PAF1,CTR9,CD274,TRAF6,MYD88,SRD5A1,PRDX2,MAPK14,TADA3,BRCA1,CXCL1,MSN,NCOR2,PPARG,TFPI,TRIM5,WNT6,CMPK2,PDK4,ABHD2,LY96,FBP1,CEBPE,CASP9,RAN,LCOR,FES,MMP…
GO:BP	embryo development	GO:0009790	FALSE	6.45E-55	54.1905	1135	3059	180	78724	MAFG,B4GALT5,CEBPA,ASCL2,TFEB,LOXL3,CTNNB1,DEAF1,AKIRIN2,MAPK1,DBN1,LAMB3,ATP11A,ITPK1,BMP2,APOA1,MAFB,GRB2,EPN1,PCSK5,CREBBP,CCM2,MMP8,PRKACA,TDRD7,CEBPB,KLF2,SPINT1,TRIP6,EGLN1,NF2,RUVBL2,MFN2,HLX,SMAD1,FOLR1,STK4,PSEN1,MGAT1,INO80C,STK3,WDTC1,HS6ST1,BRK1,INHBA,PAF1,RTN4,TRIM28,CDK5R1,MYADM,CTR9,TRAF6,HIRA,APAF1,SLC39A1,TADA3,BRCA1,SLC30A1,FZD2,SUFU,PLXNA2,WNT6,PLOD3,PKD1,TMEM107,HIF1A,ITGB2,MY…
GO:BP	negative regulation of protein metabolic process	GO:0051248	FALSE	6.69E-55	54.1745	677	3059	138	78724	SEMA4D,PTEN,FLOT2,CTNNB1,MVP,ARRB1,PRKCD,BMP2,TIMP2,CEACAM1,YWHAG,BANP,PARP10,SESN2,HMG20B,PYCARD,TSPO,HMGCR,IL1B,SERPINB8,PPP1R15B,LRRK1,EIF4E2,NF2,G6PD,SLC8A1,CTSA,NR1H3,CYFIP1,QRICH2,QKI,BAK1,PSEN1,ANG,EIF2AK2,CEP63,DTX3L,ACO1,RB1,CLN3,IRAK3,PTPN6,CPEB4,RGS14,RTN4,CTDSP1,EIF6,HSPB1,CST7,VPS35,DUSP3,LILRB4,SERPINB6,XRN1,SUFU,TFPI,IL1R2,EIF2AK1,USP25,CSTA,NANOS3,BEX1,DUSP6,GPS2,GAPDH,PTX3,CD300A…
GO:BP	ubiquitin-dependent protein catabolic process	GO:0006511	FALSE	6.79E-55	54.1681	628	3059	133	78724	VPS37B,LAPTM5,GSK3A,NSFL1C,CEBPA,PTEN,ANAPC11,UBE2S,KLHL8,OS9,CTNNB1,RNF111,WWP2,AKIRIN2,ARRB1,ARRDC1,FBXO6,RAD23A,FBXW11,NDFIP1,DCAF11,FBXO27,HERPUD1,RNF144B,VPS37C,RBCK1,TOLLIP,CHMP4B,FBXO45,CHMP2A,PTPN23,PSMD13,SHARPIN,CHMP1A,MAEA,KCTD5,CCDC22,UBXN2B,VPS4B,QRICH2,FBXL5,PINK1,PSMD2,TRAF7,PSEN1,RNF185,DTX3L,UBE2H,PSMD4,TRIM28,TRIM25,DDIT3,TBL1X,STAM2,FZR1,UBE2A,SUFU,GABARAP,RFFL,RNF130,USP25,RC3…
GO:BP	organelle localization	GO:0051640	FALSE	9.49E-55	54.0229	620	3059	132	78724	NSFL1C,PTEN,DYNLT1,MARK2,TFEB,EXOC3,CTNNB1,RAB7A,WIPI1,STX10,FBXW11,MAP1S,UNC13D,TRAPPC3,TOR1A,LAMP1,SYK,STXBP2,FGR,PLEKHM2,SNAP29,BTK,CHMP4B,MEF2A,CHMP2A,CHMP1A,SMPD3,UBXN2B,VPS4B,MFN2,NUSAP1,STXBP3,KIF13A,SYN2,PINK1,DCTN2,SPAST,HPS6,PSEN1,PDZD8,UBB,LAMTOR1,RB1,CLN3,ARL8B,EIF6,TRAPPC5,RAC2,INSC,BRAT1,ACTR2,YWHAZ,TRAPPC9,PKD1,SYNJ1,HIF1A,MYO7A,TCIRG1,NUP98,RAN,RNF167,VAMP8,ARFGAP2,FES,MAP4,GAB2,C…
GO:BP	vasculature development	GO:0001944	FALSE	1.31E-54	53.8818	762	3059	146	78724	HK2,EMILIN2,GAB1,CTNNB1,JMJD6,MAPK1,GRN,KLF5,TNFRSF12A,CAMP,BMP2,SEMA4A,CEACAM1,HPSE,SYK,LIPA,HDAC5,PRKD2,EPN1,PCSK5,SRPK2,CCM2,C3AR1,IL1B,MAP3K3,PDGFRB,KLF2,HIF3A,SPINT1,EGLN1,SHC1,TGFBI,VPS4B,TNFSF12,COL8A2,SMAD1,FOLR1,QKI,STK4,BAK1,PSEN1,ACTG1,ANG,VAV3,HS6ST1,AAMP,PTPN6,RTN4,SPHK1,HSPB1,RLN2,DDIT3,C5AR1,MAPK14,BRCA1,YWHAZ,RHOB,EFNB2,BSG,SUFU,PPARG,PKD1,SLC12A6,HIF1A,COMT,ITGB2,SHB,CXCR4,SP1,PR…
GO:BP	positive regulation of apoptotic process	GO:0043065	FALSE	1.40E-54	53.854	528	3059	122	78724	CTSD,NLRC4,NACC2,EMILIN2,TNFRSF1B,CTNNB1,RIPK3,BCL6,INPP5D,GRN,CTSS,TNFRSF12A,SLC9A1,MAP2K6,VDR,PRKCD,BMP2,TEX261,S100A8,RBCK1,PYCARD,TSPO,JAK2,SRPK2,LGALS1,S100A9,TNFRSF8,IGF2R,STYXL1,MFN2,TNFSF12,MAP3K5,STK4,BAK1,TRAF7,PSEN1,UBB,STK3,INHBA,CDK5R1,CD274,APAF1,DDIT3,RAD9A,RHOB,PPARG,E2F3,LTBR,SP1,DUSP6,CASP9,EIF2B5,TFPT,MMP9,CTNNBL1,LYN,FOXO3,TGFBR1,MAP3K11,IP6K2,SFRP1,DAPK3,GSN,ATF6,DEDD2,TLR6,B…
GO:BP	positive regulation of locomotion	GO:0040017	FALSE	1.49E-54	53.8277	603	3059	130	78724	MAP2K2,SEMA4D,ASCL2,GAB1,BCL6,MAPK1,GRN,MAP4K4,RAC1,BMP2,SEMA4A,CSF1R,CD151,PRKD2,TNFSF18,FERMT3,PYCARD,FGR,MOSPD2,JAK2,CCL23,C3AR1,GNAI2,IL1B,MAP3K3,PDGFRB,APP,CORO1A,PREX1,TRIP6,FUT7,STK4,ACTG1,MIEN1,CXCL14,AAMP,IRS2,RTN4,MYADM,CD274,SPHK1,DOCK4,HSPB1,RAC2,C5AR1,CEACAM6,CMKLR1,RHOB,VPS35,TNFRSF14,NEDD9,BSG,SUCNR1,HIF1A,CXCR4,SP1,STAT5A,INSL3,TNFSF14,FAM89B,IQSEC1,MMP9,SSH1,LYN,VSIR,PDPK1,TMSB4X…
GO:BP	blood vessel development	GO:0001568	FALSE	1.55E-54	53.8108	732	3059	143	78724	HK2,EMILIN2,GAB1,CTNNB1,JMJD6,MAPK1,GRN,KLF5,TNFRSF12A,CAMP,SEMA4A,CEACAM1,HPSE,SYK,LIPA,HDAC5,PRKD2,EPN1,PCSK5,SRPK2,CCM2,C3AR1,IL1B,MAP3K3,PDGFRB,KLF2,HIF3A,SPINT1,EGLN1,SHC1,TGFBI,VPS4B,TNFSF12,COL8A2,SMAD1,FOLR1,QKI,STK4,BAK1,PSEN1,ACTG1,ANG,VAV3,HS6ST1,AAMP,PTPN6,RTN4,SPHK1,HSPB1,RLN2,DDIT3,C5AR1,MAPK14,BRCA1,YWHAZ,RHOB,EFNB2,BSG,SUFU,PPARG,PKD1,SLC12A6,HIF1A,COMT,ITGB2,SHB,CXCR4,SP1,PROK2,M…
GO:BP	response to wounding	GO:0009611	FALSE	2.71E-54	53.5667	568	3059	126	78724	MAP2K2,EMILIN2,PTEN,F11R,TYROBP,NRG1,EXTL3,ADORA3,GRN,GLA,RAC1,TNFRSF12A,F12,PRKCD,ITPK1,TOR1A,WAS,CEACAM1,VAV1,HPSE,SYK,KIAA0319,FCER1G,UBASH3B,CD151,FERMT3,TSPO,JAK2,SERPINA1,CHMP4B,CHMP2A,CHMP1A,DGKG,PLAUR,VPS4B,PLSCR1,STXBP3,NMNAT1,KREMEN1,FOLR1,HPS6,ACTG1,ANXA5,VAV3,ARL8B,PTPN6,GGCX,P2RX1,ENTPD1,HSPB1,DDIT3,PRDX2,MAPK14,RANGAP1,PPARG,TFPI,PTPRF,HIF1A,COMT,F5,MMRN1,ABHD2,CXCR4,NLRP6,INSL3,MAP…
GO:BP	protein modification by small protein conjugation	GO:0032446	FALSE	3.76E-54	53.4247	853	3059	154	78724	LAPTM5,GSK3A,PTEN,RNF208,ANAPC11,UBE2S,TRIM8,KLHL8,KLHL2,OS9,TICAM1,CTNNB1,RNF111,WWP2,ARRB1,ARRDC1,RNF181,FBXO6,FBXW11,NDFIP1,PHRF1,DCAF11,UBE2E3,UBA52,HERPUD1,RNF144B,PARP10,RBCK1,HMG20B,TOLLIP,ATG3,TSPO,RNF138,FBXO45,NEURL3,CTU1,MGRN1,SHARPIN,NT5C2,PTTG1IP,FBXL5,PINK1,TRAF7,RNF185,UBB,VCPIP1,CEP63,DTX3L,WDTC1,UBE2H,PHF23,TRIM28,SPHK1,TRAF6,KLHL18,TRIM25,UBC,RNF135,BRCA1,MED18,FZR1,RANGAP1,UBE2…
GO:BP	post-translational protein modification	GO:0043687	FALSE	1.03E-53	52.9855	1027	3059	169	78724	LAPTM5,GSK3A,PTEN,RNF208,ANAPC11,UBE2S,TRIM8,KLHL8,KLHL2,OS9,TICAM1,CTNNB1,RNF111,WWP2,ARRB1,ARRDC1,RNF181,FBXO6,FBXW11,NDFIP1,PHRF1,DCAF11,PRKCD,UBE2E3,TOR1A,UBA52,HERPUD1,RNF144B,PARP10,RBCK1,HMG20B,TOLLIP,ATG3,TSPO,JAK2,RNF138,FBXO45,NEURL3,CTU1,MGRN1,SHARPIN,NT5C2,PTTG1IP,FBXL5,PINK1,TRAF7,RNF185,UBB,VCPIP1,CEP63,DTX3L,WDTC1,UBE2H,PHF23,TRIM28,SPHK1,TRAF6,KLHL18,TRIM25,UBC,RNF135,BRCA1,MED18,…
GO:BP	activation of innate immune response	GO:0002218	FALSE	1.53E-53	52.8156	305	3059	94	78724	CYBA,NLRC4,ZDHHC12,CASP1,TYROBP,TICAM1,FCN1,NLRP3,SMPDL3A,CTSS,MAP2K6,SLC15A3,TLR7,S100A8,TLR8,SYK,MAPKAPK2,ECSIT,PYCARD,CREBBP,TLR5,BTK,CLEC4E,SLC46A2,S100A9,CARD8,TLR2,ZCCHC3,LTF,NR1H3,TLR1,EIF2AK2,IRF1,IRAK3,SLC19A1,ZDHHC3,RTN4,CD274,TRAF6,SLC15A4,TRIM25,MYD88,RNF135,CD300LF,HSP90AA1,NAIP,NLRX1,TRIM5,GPR108,LY96,NLRP6,GPS2,CD300A,PIK3AP1,ZC3HAV1,LYN,PDPK1,UNC93B1,TIRAP,MAPKAPK3,RSAD2,HCK,ZDHHC…
GO:BP	response to hormone	GO:0009725	FALSE	1.89E-53	52.7231	907	3059	158	78724	CTSD,AGTRAP,CTSB,GSK3A,GAB1,RETN,RXRA,FKBP4,BLVRB,MAPK1,HCLS1,RAB13,CTSS,SRSF4,FOSL2,SLC9A1,VDR,PRKCD,TIMP2,NCOA6,CEACAM1,YWHAG,PTPRE,GRB10,HDAC5,GRB2,SESN2,RAB10,TSPO,SORT1,PXN,SLC2A1,JAK2,GNAI2,IL1B,POR,PRKACA,KLF2,ZNF592,FUT7,TLR2,SHC1,ESRRB,NR1H3,CYFIP1,STXBP3,ACSBG1,ARSB,GNB1,PADI2,SH2B2,HADHA,DHH,ANG,SAFB,JAK3,RB1,WDTC1,IRS2,TYK2,INHBA,EIF6,TRIM25,CSK,SRD5A1,MAPK14,TADA3,ECHDC3,BRCA1,RANGAP…
GO:BP	neuron projection development	GO:0031175	FALSE	3.00E-53	52.5234	1023	3059	168	78724	MAP2K2,SEMA4D,TWF2,GSK3A,B4GALT5,PTEN,MARK2,CTNNB1,FKBP4,GRN,DBN1,GLA,MAP4K4,GFRA3,EFNA4,RAC1,MAP1S,RAB13,DIP2B,SEMA4A,TOR1A,CSF1R,KIAA0319,RHOG,LYPLA2,IST1,RAB10,TSPO,NUMBL,JAK2,EFHD1,FBXO45,MEF2A,SIPA1L1,APP,S100A9,PREX1,DGKG,STYXL1,OLIG1,PDLIM5,TMEM30A,ARF4,CYFIP1,KREMEN1,ARSB,FOLR1,KIF13B,SPAST,PSEN1,CUX1,ACTG1,UBB,RB1,DENND5A,RTN4,CDK5R1,S100A6,SRGAP2,EHD1,SLC30A1,EFNB2,B3GNT2,PTPRF,PLXNA2,M…
GO:BP	adaptive immune response	GO:0002250	FALSE	4.85E-53	52.3143	762	3059	144	78724	ASCL2,TFEB,LOXL3,SIPA1,LILRA6,TNFRSF1B,RIPK3,AKIRIN2,BCL6,NLRP3,IL17RA,SASH3,INPP5D,NDFIP1,TAP1,CTSS,UNC13D,PRKCD,SECTM1,SEMA4A,WAS,CR1L,CEACAM1,YWHAG,TLR8,SYK,FCER1G,PRKD2,TNFSF18,PYCARD,JAK2,BTK,IL1B,TRBV6-2,LGALS1,BATF,PVR,BRD4,FUT7,MSH6,HLA-F,HLA-E,TNFSF12,HLX,IRF1,JAK3,CLC,C1RL,PTPN6,TYK2,IFNK,CD274,TRAF6,SLC15A4,MYD88,CSK,RAP1GAP2,TNFRSF14,LILRB4,HLA-A,BMX,RC3H1,TCIRG1,STAT5A,CTNNBL1,PLA2G4…
GO:BP	negative regulation of intracellular signal transduction	GO:1902532	FALSE	7.36E-53	52.1331	662	3059	134	78724	GSK3A,PTEN,ZDHHC12,CTNNB1,BCL6,FBXW11,HOMER3,SMPDL3A,PRKCD,BMP2,YWHAG,HERPUD1,SESN2,TMEM127,PYCARD,IL1B,SPI1,PRKACA,PPP1R15B,CARD8,MGRN1,BRD4,DGKG,SMPD3,CCDC22,NF2,PTTG1IP,PLAUR,TBC1D10C,MFN2,PINK1,PPP1R10,IRAK3,PTPN6,RGS14,GBP1,HSPB1,CSK,DDIT3,MAPK14,BRCA1,YWHAZ,DUSP3,LILRB4,NCOR2,NLRX1,PPARG,RFFL,HIF1A,ZNF385A,FBP1,DUSP6,NLRP6,GPS2,RNF167,USP10,PPM1B,FAM89B,CD300A,INPP5K,MMP9,MUL1,LYN,NLRP12,TM…
GO:BP	metal ion transport	GO:0030001	FALSE	7.71E-53	52.1127	883	3059	155	78724	CYBA,TRPC6,CACNA1E,LMTK2,LILRA5,TCN2,CTNNB1,FKBP4,WWP2,TESC,DIAPH1,CD63,CRACR2B,NDFIP1,HOMER3,SLC34A3,SLC9A1,VDR,ARHGAP1,OPRD1,ORAI3,UBASH3B,ASPH,TSPO,GHITM,AKAP5,GNAI2,PANX1,GNB2,PDGFRB,LCN2,PRKACA,SLC31A2,SLC24A3,CORO1A,SLC12A9,VPS4B,SLC4A8,G6PD,SLC8A1,LTF,ATP1B3,BAK1,PSEN1,GPR35,SLC38A2,NIPA2,PTPN6,P2RX1,KCNAB2,KCNJ15,TCN1,DDIT3,SLC22A4,SLC9A8,CNNM4,STEAP3,CACNG8,SLC39A1,SLC40A1,KCNJ2,STEAP4,S…
GO:BP	positive regulation of cell motility	GO:2000147	FALSE	1.41E-52	51.8502	587	3059	126	78724	MAP2K2,SEMA4D,ASCL2,GAB1,BCL6,MAPK1,GRN,MAP4K4,RAC1,BMP2,SEMA4A,CSF1R,CD151,PRKD2,TNFSF18,FERMT3,PYCARD,FGR,MOSPD2,JAK2,CCL23,C3AR1,GNAI2,IL1B,MAP3K3,PDGFRB,APP,CORO1A,PREX1,TRIP6,FUT7,STK4,ACTG1,MIEN1,CXCL14,AAMP,IRS2,RTN4,MYADM,CD274,SPHK1,DOCK4,HSPB1,RAC2,C5AR1,CEACAM6,CMKLR1,RHOB,TNFRSF14,NEDD9,BSG,HIF1A,CXCR4,SP1,STAT5A,INSL3,TNFSF14,FAM89B,IQSEC1,MMP9,SSH1,LYN,VSIR,PDPK1,TMSB4X,CRKL,TGFBR1,…
GO:BP	positive regulation of cell migration	GO:0030335	FALSE	1.57E-52	51.8031	559	3059	123	78724	SEMA4D,ASCL2,GAB1,MAPK1,GRN,MAP4K4,RAC1,BMP2,SEMA4A,CSF1R,CD151,PRKD2,TNFSF18,FERMT3,PYCARD,FGR,MOSPD2,JAK2,CCL23,C3AR1,GNAI2,IL1B,MAP3K3,PDGFRB,APP,CORO1A,PREX1,TRIP6,FUT7,STK4,ACTG1,MIEN1,CXCL14,AAMP,IRS2,RTN4,MYADM,CD274,SPHK1,DOCK4,HSPB1,RAC2,C5AR1,CEACAM6,CMKLR1,RHOB,TNFRSF14,NEDD9,BSG,HIF1A,CXCR4,SP1,STAT5A,INSL3,TNFSF14,FAM89B,IQSEC1,MMP9,SSH1,LYN,VSIR,PDPK1,TMSB4X,CRKL,TGFBR1,TIRAP,DAPK3,…
GO:BP	cell activation involved in immune response	GO:0002263	FALSE	1.71E-52	51.7665	320	3059	95	78724	ASCL2,LOXL3,TYROBP,DYSF,TICAM1,BCL6,NLRP3,LCP1,NDFIP1,GRN,UNC13D,PGLYRP1,SEMA4A,LAMP1,CEACAM1,SYK,STXBP2,FCER1G,TNFSF18,PYCARD,FGR,BTK,SPI1,LGALS1,BATF,CLEC4E,APP,CORO1A,BRD4,APBB1IP,MSH6,HLA-F,STXBP3,TNFSF12,HLX,PSEN1,JAK3,PRAM1,PTPN6,IFNK,FGL2,SLC15A4,MYD88,RAC2,SUCNR1,ITGB2,SHB,RC3H1,STAT5A,VAMP8,FES,GAB2,CD300A,LYN,PDPK1,LAT2,CBL,CD244,PIK3CG,ITGAM,ICAM1,C17ORF99,LRP1,ANXA3,NOTCH2,ZBTB7B,RAB2…
GO:BP	small GTPase-mediated signal transduction	GO:0007264	FALSE	2.21E-52	51.6565	505	3059	117	78724	SEMA4D,DOK1,DENND1A,F11R,ARAP1,SIPA1,SH2D3C,BCL6,CDC42EP4,ARRB1,ARHGAP26,MAP4K4,RAC1,GPR17,RALGAPA2,APOA1,ARHGAP1,WAS,VAV1,RHOG,LIPA,ITSN1,GRB2,RASGEF1A,FGD3,SIPA1L1,DOK3,PREX1,DOK4,MFN2,CYFIP1,RGS19,GNB1,SH2B2,GPR35,CYTH2,GMIP,RB1,VAV3,BRK1,RTN4,ARHGAP27,DOCK4,EPS8L1,RAC2,SRGAP2,RHOB,RAP1GAP2,GABARAP,NUCB1,MYO9B,FBP1,FGD4,DOK2,RAB21,RAB35,IQSEC1,AKAP13,RRAD,KBTBD7,SIAH2,CRKL,DENND3,CBL,TEK,TIAM2…
GO:BP	amide metabolic process	GO:0043603	FALSE	5.06E-52	51.2962	455	3059	111	78724	GSK3A,B4GALT5,CEBPA,PSENEN,B3GALT4,MGST2,SAMD8,GLA,PDK3,FAR2,SMPDL3A,PRKCD,GBA2,GM2A,TM9SF2,PCSK5,HMGCR,DEGS1,NIT1,SLC27A2,ALOXE3,NT5C2,FUT7,SMPD3,HSD17B4,G6PD,ACOT8,ACSBG1,FOLR1,ACSL3,PSEN1,APH1B,ACSS2,MEP1A,MTHFD2,SLC19A1,PLA2G15,P2RX1,RTN4,CEL,SPHK1,PIPOX,DGAT1,HEXB,ASAH1,SUCLG1,P4HB,GSR,PPCDC,ACSF2,PDK4,SP1,ELOVL3,ST3GAL2,GSTO1,SORL1,ECE2,SGPL1,B4GALT3,IDH1,GGT1,GSTP1,SUCLA2,NANS,NAGK,SCARB2,…
GO:BP	endomembrane system organization	GO:0010256	FALSE	5.31E-52	51.2746	613	3059	128	78724	MAP2K2,VPS37B,NSFL1C,SYNGR1,PTEN,AP1B1,TOM1,RAB7A,RNASEK,MAPK1,ATP6V0A1,ATG9A,TMED1,TOR1A,RAB3GAP2,REEP4,MAFB,VPS37C,AGFG1,TMEM127,IST1,RAB10,PLEKHM2,SNAP29,TMEM43,ATP6AP1,CHMP4B,DEGS1,CHMP2A,SYP,BIN2,S100A9,CHMP1A,DYM,UBXN2B,VPS4B,PLSCR1,FOLR1,SPAST,HPS6,LAMTOR1,VCPIP1,CLN3,ARL8B,NDRG1,RTN4,SYNGR2,STAM2,SLC9A8,YWHAZ,VTA1,ATP6V0C,PACSIN2,SYNJ1,ZNF385A,YIPF4,FOLR2,CXCR4,UBR4,CORO7,MAP2K1,KCNE1,TAR…
GO:BP	cellular response to nitrogen compound	GO:1901699	FALSE	8.42E-52	51.0746	645	3059	131	78724	CTSD,AGTRAP,GSK3A,RRAGD,TYROBP,GAB1,CTNNB1,BLVRB,DIAPH1,GNA15,NLRP3,MAPK1,RAB13,SLC9A1,CAMP,PRKCD,CEACAM1,YWHAG,PTPRE,SYK,GRB10,HDAC5,GRB2,KLF16,SESN2,RAB10,PXN,JAK2,GNAI2,IL1B,PRKACA,KLF2,APP,ZNF592,FUT7,ZCCHC3,SHC1,SLC8A1,CYFIP1,MAP3K5,FOLR1,GNB1,SH2B2,PSEN1,JAK3,RB1,WDTC1,IRS2,TYK2,INHBA,CDK5R1,CSK,SRD5A1,ECHDC3,BRCA1,RANGAP1,VPS35,RPS6KB2,XRN1,PPARG,NCOA2,PDK4,COMT,FOLR2,FBP1,SP1,STAT5A,CHRM3…
GO:BP	viral process	GO:0016032	FALSE	9.60E-52	51.0176	423	3059	107	78724	VPS37B,CTSB,GSK3A,DYNLT1,F11R,RNASEL,SELPLG,TRIM8,ZFYVE1,IFITM1,WWP2,OAZ2,RAB7A,RNASEK,RAD23A,SRPK1,SLC1A5,ISG20,CSF1R,LAMP1,PARP10,VPS37C,PCSK5,SRPK2,CHMP4B,CHMP2A,LGALS1,SETDB1,IFITM2,PVR,IGF2R,CHMP1A,BRD4,VPS4B,PLSCR1,LTF,OAZ1,SLPI,MGAT1,EIF2AK2,PARP9,ARL8B,TRIM28,TRIM25,CALCOCO2,TNFRSF14,EFNB2,BSG,P4HB,TRIM5,STAU1,CXCR4,SP1,PSMC3,RAN,VAMP8,CTBP2,PTX3,INPP5K,ST3GAL2,ZC3HAV1,TARDBP,CBL,RSAD2,TR…
GO:BP	regulation of hemopoiesis	GO:1903706	FALSE	1.59E-51	50.7984	425	3059	107	78724	CEBPA,ASCL2,LOXL3,TYROBP,NFAM1,CTNNB1,TESC,BCL6,NLRP3,SASH3,HCLS1,INPP5D,NDFIP1,RCOR1,CD101,SMARCD3,PGLYRP1,CEACAM1,SYK,MAFB,UBASH3B,BTK,CTNNBIP1,SPI1,LGALS1,BATF,CEBPB,SLC46A2,BRD4,LTF,HLX,QKI,IRF1,JAK3,RB1,PTPN6,INHBA,PAF1,FGL2,CTR9,EIF6,TRAF6,PRDX2,MAPK14,LILRB4,NEDD9,HIF1A,SHB,RC3H1,STAT5A,FES,GFI1B,LYN,VSIR,EVI2B,FOXO3,SFRP1,HSPA1A,ABCB10,BRPF3,ZMIZ1,JAG1,ZFP36,KLF13,PRELID1,HSF1,STAT5B,NOTC…
GO:BP	animal organ morphogenesis	GO:0009887	FALSE	2.13E-51	50.6725	1042	3059	167	78724	MAP2K2,GSK3A,PTEN,DGCR2,CTNNB1,NRG1,FBXW11,MAPK1,RELT,LAMB3,FOSL2,ATG9A,VDR,SMARCD3,BMP2,CSF1R,CEACAM1,SYK,LIPA,MAFB,FLI1,FGR,CTNNBIP1,TDRD7,CEBPB,EGLN1,SMPD3,NF2,MFN2,LTF,COL8A2,HLX,FOLR1,BAK1,PSEN1,APCDD1,TSPEAR,INHBA,RTN4,TRAF6,FREM1,CNNM4,SLC39A1,MAPK14,SLC40A1,MSN,EFNB2,FZD2,BSG,SUFU,WNT6,PLOD3,PKD1,TMEM107,HIF1A,MYO7A,TCIRG1,CBS,MAP2K1,SOX1,HIPK1,EFEMP2,SGPL1,ETV7,FOXO3,MYL3,CRKL,NDST1,TGFB…
GO:BP	innate immune response-activating signaling pathway	GO:0002758	FALSE	2.83E-51	50.5489	284	3059	89	78724	CYBA,NLRC4,ZDHHC12,CASP1,TYROBP,TICAM1,FCN1,NLRP3,SMPDL3A,CTSS,MAP2K6,SLC15A3,TLR7,S100A8,TLR8,SYK,MAPKAPK2,ECSIT,PYCARD,CREBBP,TLR5,BTK,CLEC4E,SLC46A2,S100A9,CARD8,TLR2,ZCCHC3,LTF,NR1H3,TLR1,EIF2AK2,IRF1,IRAK3,SLC19A1,ZDHHC3,RTN4,CD274,TRAF6,SLC15A4,TRIM25,MYD88,RNF135,CD300LF,NAIP,NLRX1,GPR108,LY96,NLRP6,GPS2,CD300A,PIK3AP1,ZC3HAV1,LYN,PDPK1,UNC93B1,TIRAP,MAPKAPK3,RSAD2,HCK,ZDHHC5,HSPA1A,NAGK,T…
GO:BP	protein modification by small protein conjugation or removal	GO:0070647	FALSE	2.99E-51	50.5238	975	3059	161	78724	LAPTM5,GSK3A,PTEN,RNF208,ANAPC11,UBE2S,TRIM8,KLHL8,KLHL2,OS9,TICAM1,CTNNB1,RNF111,WWP2,ARRB1,ARRDC1,RNF181,FBXO6,FBXW11,NDFIP1,PHRF1,DCAF11,UBE2E3,TOR1A,UBA52,HERPUD1,RNF144B,PARP10,RBCK1,HMG20B,TOLLIP,ATG3,TSPO,RNF138,FBXO45,NEURL3,CTU1,MGRN1,SHARPIN,NT5C2,PTTG1IP,FBXL5,PINK1,TRAF7,RNF185,UBB,VCPIP1,CEP63,DTX3L,WDTC1,UBE2H,PHF23,TRIM28,SPHK1,TRAF6,KLHL18,TRIM25,UBC,RNF135,BRCA1,MED18,FZR1,RANGAP…
GO:BP	leukocyte activation involved in immune response	GO:0002366	FALSE	5.66E-51	50.2471	316	3059	93	78724	ASCL2,LOXL3,TYROBP,DYSF,TICAM1,BCL6,NLRP3,LCP1,NDFIP1,GRN,UNC13D,PGLYRP1,SEMA4A,LAMP1,CEACAM1,SYK,STXBP2,FCER1G,TNFSF18,PYCARD,FGR,BTK,SPI1,LGALS1,BATF,CLEC4E,CORO1A,BRD4,APBB1IP,MSH6,HLA-F,STXBP3,TNFSF12,HLX,PSEN1,JAK3,PRAM1,PTPN6,IFNK,FGL2,SLC15A4,MYD88,RAC2,SUCNR1,ITGB2,SHB,RC3H1,STAT5A,VAMP8,FES,GAB2,CD300A,LYN,PDPK1,LAT2,CBL,CD244,PIK3CG,ITGAM,ICAM1,C17ORF99,ANXA3,NOTCH2,ZBTB7B,RAB27A,CCR2,S…
GO:BP	regulation of cell-cell adhesion	GO:0022407	FALSE	8.60E-51	50.0657	494	3059	114	78724	LAPTM5,EMILIN2,F11R,ASCL2,LOXL3,FLOT2,BCL6,NLRP3,SASH3,NDFIP1,SMARCD3,PRKCD,BMP2,APOA1,CEACAM1,YWHAG,VAV1,SYK,UBASH3B,FERMT3,PYCARD,JAK2,IL1B,SPI1,LGALS1,PTPN23,CEBPB,CORO1A,BRD4,FUT7,NF2,PLAUR,HLA-E,HLX,IRF1,JAK3,PTPN6,TYK2,MYADM,FGL2,CD274,TRAF6,CSK,PRDX2,MAPK14,CEACAM6,AKNA,DUSP3,TNFAIP8L2,TNFRSF14,LILRB4,HLA-A,EFNB2,ITGB2,MMRN1,SHB,RC3H1,STAT5A,TNFSF14,CD300A,LYN,VSIR,PDPK1,FOXO3,ALOX5,CD44,M…
GO:BP	negative regulation of response to external stimulus	GO:0032102	FALSE	5.50E-50	49.2599	388	3059	101	78724	RIN3,PTEN,ELF4,TNFRSF1B,EXTL3,NDFIP1,GRN,GPR17,F12,PRKCD,PGLYRP1,APOA1,CEACAM1,SYK,KIAA0319,UBASH3B,FGR,CARD16,CARD8,SHARPIN,AOAH,TRAFD1,NT5C2,EIF4E2,PLAUR,HLA-F,HLA-E,LTF,NR1H3,KREMEN1,PADI2,CEP63,RB1,IRAK3,PTPN6,FGL2,PRDX2,MAPK14,CST7,YWHAZ,VPS35,DUSP3,TNFAIP8L2,HLA-A,NLRX1,PPARG,TFPI,MMRN1,NLRP6,GPS2,PPM1B,MUL1,LYN,STAT2,NLRP12,TMSB4X,DUSP1,ALOX5,HCK,TEK,PSMB4,MAPK7,GSTP1,ANXA2,ELANE,GFER,CORO…
GO:BP	cell surface receptor protein tyrosine kinase signaling pathway	GO:0007169	FALSE	7.60E-50	49.1192	629	3059	127	78724	MAP2K2,CTSD,DOK1,GSK3A,ANKS1A,GAB1,CTNNB1,NRG1,MVP,BLVRB,RAB7A,CD63,MAPK1,REPS2,GFRA3,EFNA4,RAC1,PRKCD,SHKBP1,BMP2,CSF1R,CEACAM1,VAV1,PTPRE,SYK,GRB10,MAPKAPK2,UBASH3B,GRB2,PRKD2,FGR,SORT1,PXN,JAK2,GNAI2,IL1B,PDGFRB,SIPA1L1,DOK3,IGF2R,ZNF592,FUT7,SMPD3,DOK4,PLAUR,SHC1,CYFIP1,SH2B2,PSEN1,JAK3,IRS2,RGS14,TYK2,RTN4,CDK5R1,HSPB1,PTPN12,MAPK14,DUSP3,RPS6KB2,EFNB2,NEDD9,HIF1A,PDK4,STAT5A,DOK2,MAP2K1,GAB…
GO:BP	immune response-regulating cell surface receptor signaling pathway	GO:0002768	FALSE	9.39E-50	49.0272	341	3059	95	78724	CYBA,LAPTM5,TYROBP,NFAM1,TICAM1,FCN1,MAPK1,INPP5D,FOSL2,PRKCD,CEACAM1,VAV1,SYK,LIPA,FCER1G,GRB2,ECSIT,RBCK1,PRKD2,FGR,CREBBP,OSCAR,C3AR1,TLR5,BTK,CLEC4E,TLR2,PLSCR1,LTF,NR1H3,TLR1,SH2B2,PSEN1,PRAM1,VAV3,PTPN6,GBP1,TRAF6,MYD88,CSK,C5AR1,CMKLR1,DUSP3,RNF31,LILRB4,HLA-A,BMX,SHB,LY96,RC3H1,GPS2,EIF2B5,CD300A,PIK3AP1,LYN,CRKL,TIRAP,LAT2,UBR2,HCK,TLR6,SQSTM1,ITGAM,BTNL3,SCIMP,CD14,FCGR3A,OAS1,SPG21,IFI…
GO:BP	regulation of plasma membrane bounded cell projection organization	GO:0120035	FALSE	1.32E-49	48.8805	642	3059	128	78724	MAP2K2,SEMA4D,TWF2,GSK3A,PTEN,MARK2,ARAP1,ARPC2,FKBP4,CDC42EP4,GRN,DBN1,GLA,MAP4K4,RAC1,KLF5,DIP2B,PRKCD,WAS,KIAA0319,RHOG,IST1,ATG3,SIPA1L1,S100A9,PREX1,DGKG,STYXL1,PDLIM5,TMEM30A,ARF4,CYFIP1,KREMEN1,ARSB,KIF13B,PSEN1,CUX1,MIEN1,FSCN1,CLN3,BRK1,DENND5A,RTN4,CDK5R1,EPS8L1,RAC2,EHD1,ACTR2,VPS35,HSP90AA1,SLC30A1,EFNB2,NEDD9,PTPRF,PLXNA2,RAB21,FES,MAP2K1,MAP4,VIM,NPTN,LYN,CRKL,TGFBR1,SFRP1,PAX6,CD44…
GO:BP	protein ubiquitination	GO:0016567	FALSE	1.59E-49	48.7979	768	3059	140	78724	LAPTM5,GSK3A,PTEN,RNF208,ANAPC11,UBE2S,TRIM8,KLHL8,KLHL2,OS9,TICAM1,CTNNB1,RNF111,WWP2,ARRB1,ARRDC1,RNF181,FBXO6,FBXW11,NDFIP1,PHRF1,DCAF11,UBE2E3,UBA52,HERPUD1,RNF144B,PARP10,RBCK1,ATG3,TSPO,RNF138,FBXO45,NEURL3,MGRN1,SHARPIN,NT5C2,PTTG1IP,FBXL5,PINK1,TRAF7,RNF185,UBB,VCPIP1,CEP63,DTX3L,WDTC1,UBE2H,PHF23,SPHK1,TRAF6,KLHL18,TRIM25,UBC,RNF135,BRCA1,MED18,FZR1,UBE2A,RNF31,HSP90AA1,GABARAP,TRIM5,TRI…
GO:BP	leukocyte mediated immunity	GO:0002443	FALSE	2.13E-49	48.671	481	3059	111	78724	TYROBP,TNFRSF1B,TICAM1,RIPK3,BCL6,NLRP3,SASH3,INPP5D,NDFIP1,UNC13D,PRKCD,SECTM1,WAS,LAMP1,CR1L,CEACAM1,YWHAG,VAV1,TLR8,SYK,STXBP2,FCER1G,GRB2,FGR,PLEKHM2,BTK,IL1B,SPI1,BATF,PVR,CORO1A,FUT7,MSH6,PRDX1,HLA-F,HLA-E,STXBP3,TNFSF12,JAK3,PRAM1,ARL8B,CLC,C1RL,PTPN6,CD274,TRAF6,SLC15A4,MYD88,RAC2,WDR1,LILRB4,HLA-A,ITGB2,TCIRG1,NLRP6,VAMP8,FES,GAB2,CD300A,LYN,PDPK1,UNC93B1,LAT2,CBL,RSAD2,CARD9,C1QA,BST2,E…
GO:BP	protein-containing complex organization	GO:0043933	FALSE	2.70E-49	48.5679	3434	3059	331	78724	POMP,CYBA,NDUFB1,TWF2,NLRC4,NACC2,NDUFS2,LRRC61,CAPG,ZDHHC12,UBE2S,CASP1,UPF1,ARPC2,TICAM1,NRG1,FKBP4,TOM1,MED16,DIAPH1,CDC42EP4,JMJD6,NLRP3,FLII,PSTPIP2,LCP1,TMEM120A,HCLS1,REPS2,MSRB2,SRPK1,RAC1,MAP1S,SLC1A5,TFIP11,SLC9A1,SMARCD3,PRKCD,TRAPPC3,NDUFB4,SHKBP1,APOA1,WAS,GBA2,SYK,CLIP1,OPRD1,GRB2,AP2S1,ECSIT,DNAJB12,DDX23,IST1,ASPH,FERMT3,NDUFA1,PYCARD,PCSK5,PXN,SLC2A1,CREBBP,MOSPD2,JAK2,SRPK2,SNAP…
GO:BP	growth	GO:0040007	FALSE	3.93E-49	48.4061	929	3059	154	78724	LAMTOR2,SEMA4D,TWF2,GSK3A,PTEN,SIPA1,CTNNB1,NRG1,SERTAD1,EXTL3,BCL6,SASH3,CDKN2C,KLF5,DIP2B,FOSL2,SLC9A1,CLSTN1,S100A8,CEACAM1,KIAA0319,TKT,ATF5,SESN2,IST1,CCM2,KLF2,APP,S100A9,MT1F,SMPD3,PDLIM5,G6PD,CYFIP1,KAZALD1,PSAP,RMI1,HLX,SMAD1,STK4,EXOSC4,NAIF1,LAMTOR1,RB1,STK3,WDTC1,INHBA,RTN4,TRIM28,CTR9,SPHK1,PTPN12,MAPK14,BRCA1,BRAT1,NDRG3,PPARG,NUBP1,HIF1A,PLAC8,COMT,FBP1,CXCR4,DUSP6,STAT5A,RAB21,FES…
GO:BP	leukocyte cell-cell adhesion	GO:0007159	FALSE	7.01E-49	48.1545	415	3059	103	78724	SEMA4D,LAPTM5,F11R,SELPLG,ASCL2,LOXL3,FLOT2,BCL6,NLRP3,SASH3,NDFIP1,SMARCD3,SELL,S100A8,YWHAG,VAV1,SYK,FERMT3,PYCARD,JAK2,IL1B,LGALS1,CEBPB,S100A9,CORO1A,BRD4,FUT7,HLA-E,HLX,IRF1,JAK3,PTPN6,TYK2,FGL2,CD274,TRAF6,RAC2,CSK,PRDX2,DUSP3,TNFAIP8L2,TNFRSF14,MSN,LILRB4,HLA-A,EFNB2,ITGB2,SHB,RC3H1,STAT5A,TNFSF14,CD300A,LYN,VSIR,PDPK1,FOXO3,ALOX5,CD44,ZMIZ1,ELANE,ICAM1,STAT5B,LGALS12,STK10,ST3GAL4,ZBTB7B,…
GO:BP	taxis	GO:0042330	FALSE	8.56E-49	48.0675	469	3059	109	78724	RIN3,SEMA4D,RNASE2,S100A12,GAB1,NRG1,IL17RA,MAPK1,HSD3B7,RAC1,RAB13,PRKCD,SEMA4A,APOA1,CSF1R,S100A8,VAV1,SYK,RHOG,CCRL2,FCER1G,PRKD2,MOSPD2,CCL23,C3AR1,RNASE3,IL1B,BIN2,PDGFRB,LSP1,S100A9,CORO1A,PREX1,PLAUR,CMTM2,PADI2,ELMO2,CXCL14,VAV3,DOCK4,HSPB1,RAC2,C5AR1,MAPK14,MPP1,CXCL1,CMKLR1,DUSP3,EFNB2,NEDD9,BSG,SUCNR1,ITGB2,CXCR4,PROK2,TNFSF14,FES,MAP2K1,TYMP,LYN,TMSB4X,DUSP1,CRKL,TIRAP,ALOX5,OXSR1,ARH…
GO:BP	pattern recognition receptor signaling pathway	GO:0002221	FALSE	1.96E-48	47.7074	267	3059	84	78724	CYBA,NLRC4,ZDHHC12,CASP1,TICAM1,FCN1,NLRP3,SMPDL3A,CTSS,MAP2K6,SLC15A3,TLR7,S100A8,TLR8,MAPKAPK2,ECSIT,PYCARD,TLR5,BTK,CLEC4E,SLC46A2,S100A9,CARD8,TLR2,ZCCHC3,LTF,NR1H3,TLR1,EIF2AK2,IRF1,IRAK3,SLC19A1,ZDHHC3,RTN4,CD274,TRAF6,SLC15A4,TRIM25,MYD88,RNF135,CD300LF,NAIP,NLRX1,GPR108,LY96,NLRP6,GPS2,CD300A,PIK3AP1,ZC3HAV1,LYN,PDPK1,UNC93B1,TIRAP,MAPKAPK3,RSAD2,ZDHHC5,HSPA1A,NAGK,TLR6,SQSTM1,MEFV,PCBP2,…
GO:BP	regulation of cell projection organization	GO:0031344	FALSE	2.39E-48	47.6212	658	3059	128	78724	MAP2K2,SEMA4D,TWF2,GSK3A,PTEN,MARK2,ARAP1,ARPC2,FKBP4,CDC42EP4,GRN,DBN1,GLA,MAP4K4,RAC1,KLF5,DIP2B,PRKCD,WAS,KIAA0319,RHOG,IST1,ATG3,SIPA1L1,S100A9,PREX1,DGKG,STYXL1,PDLIM5,TMEM30A,ARF4,CYFIP1,KREMEN1,ARSB,KIF13B,PSEN1,CUX1,MIEN1,FSCN1,CLN3,BRK1,DENND5A,RTN4,CDK5R1,EPS8L1,RAC2,EHD1,ACTR2,VPS35,HSP90AA1,SLC30A1,EFNB2,NEDD9,PTPRF,PLXNA2,RAB21,FES,MAP2K1,MAP4,VIM,NPTN,LYN,CRKL,TGFBR1,SFRP1,PAX6,CD44…
GO:BP	chemotaxis	GO:0006935	FALSE	4.22E-48	47.3745	467	3059	108	78724	RIN3,SEMA4D,RNASE2,S100A12,GAB1,NRG1,IL17RA,MAPK1,HSD3B7,RAC1,RAB13,PRKCD,SEMA4A,APOA1,CSF1R,S100A8,VAV1,SYK,RHOG,CCRL2,FCER1G,PRKD2,MOSPD2,CCL23,C3AR1,RNASE3,IL1B,BIN2,PDGFRB,LSP1,S100A9,CORO1A,PREX1,PLAUR,CMTM2,PADI2,ELMO2,CXCL14,VAV3,DOCK4,HSPB1,RAC2,C5AR1,MAPK14,MPP1,CXCL1,CMKLR1,DUSP3,EFNB2,NEDD9,BSG,SUCNR1,ITGB2,CXCR4,PROK2,TNFSF14,FES,MAP2K1,TYMP,LYN,TMSB4X,DUSP1,CRKL,TIRAP,ALOX5,OXSR1,ARH…
GO:BP	lymphocyte differentiation	GO:0030098	FALSE	6.71E-48	47.1732	442	3059	105	78724	ASCL2,LOXL3,NFAM1,CTNNB1,RIPK3,BCL6,JMJD6,NLRP3,SASH3,INPP5D,NDFIP1,FOSL2,SMARCD3,PGLYRP1,SEMA4A,VAV1,SYK,LIPA,FCER1G,HDAC5,MAFB,NFIL3,BTK,IL1B,SPI1,LGALS1,BATF,CLEC4E,SLC46A2,PREX1,BRD4,FUT7,HLX,BAK1,IRF1,JAK3,PTPN6,INHBA,IFNK,FGL2,PRDX2,LILRB4,SHB,RC3H1,TCIRG1,GPS2,STAT5A,VSIR,FOXO3,SFRP1,RSAD2,HDAC4,ZMIZ1,ADAM17,PRELID1,STAT5B,KLF6,C17ORF99,NOTCH2,ZBTB7B,CCR2,AP3D1,B2M,ADAM8,BAX,CD4,IL10,FADD,…
GO:BP	positive regulation of catalytic activity	GO:0043085	FALSE	7.05E-48	47.1515	554	3059	117	78724	MAP2K2,NCF1,SEMA4D,GSK3A,CCND3,PTEN,S100A12,MARK2,ARAP1,UBE2S,LILRA5,PSENEN,NRG1,RIPK3,ADORA3,RFC2,GRN,MAP4K4,VDR,PRKCD,RALGAPA2,BMP2,APOA1,CSF1R,TBC1D2,RHOG,JAK2,AKAP5,IL1B,PDGFRB,SIPA1L1,POR,YWHAB,MSH6,PLSCR1,LTF,NR1H3,JTB,PSAP,MAP3K5,PIK3R5,PINK1,APH1B,CAP1,TRAF6,SRGAP2,MAPK14,FZR1,RANGAP1,NEDD9,HIF1A,ITGB2,MAP2K1,EFNA3,DBI,LYN,VSIR,PDPK1,TMSB4X,MAP3K11,SFRP1,CD44,CALM3,HSPA1A,TIAM2,CCDC125,AR…
GO:BP	immune response-activating cell surface receptor signaling pathway	GO:0002429	FALSE	1.09E-47	46.9618	310	3059	89	78724	CYBA,LAPTM5,TYROBP,NFAM1,TICAM1,FCN1,MAPK1,INPP5D,FOSL2,PRKCD,CEACAM1,VAV1,SYK,LIPA,FCER1G,GRB2,ECSIT,RBCK1,PRKD2,FGR,CREBBP,C3AR1,TLR5,BTK,TLR2,PLSCR1,LTF,NR1H3,TLR1,SH2B2,PSEN1,PRAM1,VAV3,PTPN6,GBP1,TRAF6,MYD88,CSK,C5AR1,CMKLR1,DUSP3,RNF31,LILRB4,HLA-A,BMX,SHB,LY96,RC3H1,GPS2,EIF2B5,CD300A,PIK3AP1,LYN,CRKL,TIRAP,LAT2,UBR2,HCK,TLR6,SQSTM1,ITGAM,BTNL3,SCIMP,CD14,OAS1,SPG21,IFI35,BAX,F2RL1,PLD2,PA…
GO:BP	monoatomic ion homeostasis	GO:0050801	FALSE	1.18E-47	46.9266	616	3059	123	78724	CYBA,TRPC6,ATP6V0E1,DIAPH1,RAB7A,RNASEK,MAPK1,NDFIP1,ATP6V0A1,GRN,BTBD9,SLC9A1,VDR,LAMP1,HERPUD1,UBASH3B,ASPH,CCL23,TBXAS1,GHITM,ATP6AP1,PRKACA,SLC31A2,APP,SLC24A3,CORO1A,MT1F,EGLN1,CCDC22,SLC12A9,ARF1,SLC4A8,SLC8A1,FBXL5,DMXL2,ATP1B3,BAK1,PSEN1,PDZD8,ABCC6,ACO1,CLN3,PTPN6,P2RX1,ATP6V0D1,DDIT3,SLC9A8,CNNM4,SLC40A1,HEXB,KCNJ2,STEAP4,SLC30A1,ATOX1,ATP6V0C,NUBP1,EIF2AK1,SLC12A6,HIF1A,PDK4,COMT,TCIRG…
GO:BP	myeloid leukocyte activation	GO:0002274	FALSE	1.38E-47	46.8613	244	3059	80	78724	CEBPA,S100A12,TYROBP,DYSF,TICAM1,JMJD6,GRN,CAMP,UNC13D,PRKCD,SYK,STXBP2,FCER1G,PYCARD,FGR,JAK2,BTK,MMP8,SPI1,BATF,APP,PREX1,TLR2,PLSCR1,NR1H3,STXBP3,TLR1,PSEN1,PRAM1,BPI,PTPN6,NDRG1,SPHK1,TRAF6,MYD88,RAC2,C5AR1,IFNGR2,CST7,CD300LF,LILRB4,SUCNR1,LTBR,ITGB2,VAMP8,FES,GAB2,CD300A,PLA2G4A,LYN,PDPK1,LAT2,CBL,C1QA,TLR6,PIK3CG,ITGAM,ANXA3,NOTCH2,CCR2,SLC11A1,IFNGR1,FCGR3A,IFI35,F2RL1,IL10,IL4R,LRRK2,CD9…
GO:BP	positive regulation of cell development	GO:0010720	FALSE	3.33E-47	46.4782	458	3059	106	78724	MAP2K2,SEMA4D,TWF2,F11R,TYROBP,TNFRSF1B,CTNNB1,TESC,BCL6,NLRP3,SASH3,HCLS1,INPP5D,CD101,DBN1,SMARCD3,BMP2,SYK,IST1,TSPO,NUMBL,BTK,IL1B,CTNNBIP1,SPI1,SPINT1,BRD4,TLR2,CYFIP1,HLX,QKI,CUX1,RB1,RGS14,TRAF6,SLC30A1,LILRB4,NEDD9,PPARG,PLXNA2,HIF1A,SHB,CXCR4,RAB21,FES,MAP2K1,HAPLN2,NPTN,LYN,VSIR,EVI2B,FOXO3,PAX6,DICER1,TIAM2,FXR2,ZMIZ1,PLXNB2,HSF1,STAT5B,PRMT5,NOTCH2,ZBTB7B,PROC,EPHB2,AP3D1,CUL7,FMR1,PA…
GO:BP	blood vessel morphogenesis	GO:0048514	FALSE	5.92E-47	46.2276	635	3059	124	78724	HK2,EMILIN2,GAB1,CTNNB1,JMJD6,GRN,KLF5,TNFRSF12A,CAMP,SEMA4A,CEACAM1,HPSE,SYK,HDAC5,PRKD2,EPN1,SRPK2,CCM2,C3AR1,IL1B,MAP3K3,PDGFRB,KLF2,HIF3A,EGLN1,SHC1,TGFBI,VPS4B,TNFSF12,COL8A2,SMAD1,FOLR1,QKI,STK4,BAK1,ACTG1,ANG,VAV3,HS6ST1,AAMP,PTPN6,RTN4,SPHK1,HSPB1,RLN2,C5AR1,MAPK14,BRCA1,YWHAZ,RHOB,EFNB2,BSG,PPARG,SLC12A6,HIF1A,ITGB2,SHB,CXCR4,SP1,PROK2,EPAS1,TYMP,EFNA3,HIPK1,EFEMP2,SGPL1,ADIPOR2,PDPK1,TG…
GO:BP	leukocyte migration	GO:0050900	FALSE	1.44E-46	45.8419	402	3059	99	78724	RIN3,F11R,SELPLG,S100A12,ASCL2,RIPK3,IL17RA,MAPK1,HSD3B7,RAC1,CSF1R,SELL,S100A8,VAV1,SYK,FCER1G,TNFSF18,PYCARD,MOSPD2,CCL23,C3AR1,IL1B,APP,S100A9,CORO1A,PREX1,FUT7,SMPD3,PADI2,CXCL14,VAV3,RTN4,MYD88,RAC2,WDR1,C5AR1,MPP1,CXCL1,CMKLR1,TNFRSF14,MSN,NEDD9,BSG,ITGB2,CXCR4,TNFSF14,CD300A,LYN,NLRP12,DUSP1,CRKL,TIRAP,ALOX5,HCK,OXSR1,MCOLN2,ARHGEF5,LYVE1,ELANE,PIK3CG,ADAM17,PPIB,ICAM1,STAT5B,CNN2,STK10,ST…
GO:BP	organelle assembly	GO:0070925	FALSE	2.17E-46	45.6633	1046	3059	160	78724	VPS37B,CTSD,NSFL1C,LRRC61,PTEN,AP1B1,RAB32,ZDHHC12,ZFYVE1,CLCN4,TOM1,RAB7A,WIPI1,JMJD6,FLII,LCP1,RP2,SCLT1,LRFN1,ATG9A,DUSP23,CETN2,TBC1D14,RAB3GAP2,VPS37C,AGFG1,IST1,ATG3,MOSPD2,SNAP29,MTMR3,CHMP4B,MEF2A,CHMP2A,PTPN23,CCDC13,BIN2,PDGFRB,HAUS4,CORO1A,CENPK,CHMP1A,STYXL1,NF2,UBXN2B,ARF4,VPS4B,EHD4,MFN2,PINK1,BOP1,HPS6,TRAF7,PSEN1,ACTG1,FSCN1,CEP63,CLN3,ARL8B,PHF23,B9D2,EIF6,TRAF6,ATP6V0D1,WDR1,STA…
GO:BP	proteasomal protein catabolic process	GO:0010498	FALSE	2.56E-46	45.5912	543	3059	114	78724	GSK3A,NSFL1C,CEBPA,ANAPC11,UBE2S,OS9,CTNNB1,WWP2,AKIRIN2,ARRB1,FBXO6,RAD23A,FBXW11,DCAF11,FBXO27,TOR1A,HERPUD1,DNAJB12,RBCK1,MAN1A1,FBXO45,PRKACA,PSME1,PSMD13,SHARPIN,MAEA,KCTD5,UBXN2B,FBXL5,PINK1,PSME2,PSMD2,PSEN1,UGGT1,RNF185,UBB,UBE2H,PSMD4,ERLIN1,TRIM28,TRIM25,DDIT3,TBL1X,FZR1,UBE2A,GABARAP,RFFL,USP25,PKD1,PRPF19,PSMC3,UBR4,WDR26,FBXL20,TMUB2,KBTBD7,HM13,SIAH2,PSMB9,UBR2,ANAPC13,WAC,ATF6,TRPC…
GO:BP	negative regulation of molecular function	GO:0044092	FALSE	2.69E-46	45.5707	553	3059	115	78724	GSK3A,PTEN,MVP,WWP2,ADORA3,ARRB1,NDFIP1,GLA,TFIP11,PRKCD,BMP2,TIMP2,CEACAM1,YWHAG,HP,PARP10,RBCK1,PYCARD,SORT1,JAK2,AKAP5,GNAI2,IL1B,CTNNBIP1,SERPINB8,SPI1,ARL2,CARD16,CARD8,EGLN1,SLC8A1,LTF,UBLCP1,SLPI,ANXA4,PSEN1,GPR35,PARP9,GMIP,DTX3L,RB1,LRPAP1,IRS2,IRAK3,RGS14,HSPB1,CST7,CMKLR1,DUSP3,LILRB4,SERPINB6,SUFU,TMLHE,PPARG,TFPI,PTPRF,PPP1R12A,CSTA,TMBIM1,KCNE1,GAPDH,PTX3,CD300A,INPP5K,MMP9,RRAD,GST…
GO:BP	response to virus	GO:0009615	FALSE	3.15E-46	45.5021	414	3059	100	78724	RNASE2,RNASEL,TRIM8,CASP1,IFITM1,TICAM1,RIPK3,NLRP3,IL17RA,UNC13D,ISG20,TLR7,TLR8,IL10RB,PYCARD,FGR,JAK2,IL1B,IFITM2,CARD8,NT5C2,TLR2,ZCCHC3,ARF1,PLSCR1,IFNAR1,EXOSC4,RNF185,EIF2AK2,IRF1,PARP9,MLKL,DTX3L,IRAK3,TYK2,TRIM28,IFNK,FGL2,GBP1,TRAF6,TBKBP1,HSPB1,TRIM25,MYD88,RNF135,IFNGR2,MAPK14,HSP90AA1,POLR3D,TRIM5,HIF1A,CXCR4,NLRP6,VAMP8,PPM1B,MUL1,ZC3HAV1,STAT2,UNC93B1,ZMPSTE24,RSAD2,MORC3,TRIM34,CA…
GO:BP	generation of precursor metabolites and energy	GO:0006091	FALSE	3.58E-46	45.4463	478	3059	107	78724	NDUFB1,HK2,GSK3A,HK3,NDUFS2,CEBPA,PGD,WIPI1,RPIA,UQCR10,NDUFB4,UQCRQ,TKT,GRB10,LIPA,PPP1R3D,IL10RB,NDUFA1,ATG3,GHITM,PGM1,GBE1,CISD1,POR,ARL2,PRKACA,APP,PHKG1,MFN2,G6PD,PINK1,GYG1,IFNAR1,TALDO1,PSEN1,NDUFV2,NDUFC1,ACO1,IRS2,ACADVL,RBKS,COX7A2,PGLS,NDUFC2,EIF6,TPI1,SUCLG1,ALDOA,COX5A,HIF1A,COMT,FBP1,PYGB,COX6B1,GALK1,GAPDH,INPP5K,PGAM1,NDUFA11,IDH1,PHKA2,LDHA,HDAC4,ATP5MF,CS,NDOR1,COX6A1,SUCLA2,ND…
GO:BP	positive regulation of cell adhesion	GO:0045785	FALSE	4.12E-46	45.3851	488	3059	108	78724	EMILIN2,F11R,ARPC2,FLOT2,NRG1,BCL6,NLRP3,SASH3,MAP4K4,RAC1,UNC13D,SMARCD3,APOA1,YWHAG,VAV1,SYK,PRKD2,TNFSF18,PYCARD,JAK2,IL1B,LGALS1,PTPN23,ARL2,CORO1A,PREX1,BRD4,APBB1IP,FUT7,PLAUR,HLA-E,HLX,STK4,VAV3,PTPN6,TYK2,MYADM,CD274,TRAF6,CSK,CEACAM6,TNFRSF14,LILRB4,HLA-A,EFNB2,OLFM4,NEDD9,P4HB,ITGB2,MMRN1,SHB,TNFSF14,EFEMP2,LYN,VSIR,PDPK1,FOXO3,CRKL,SFRP1,ALOX5,CD44,TEK,ZMIZ1,POLDIP2,ELANE,STAT5B,ST3GAL…
GO:BP	response to growth factor	GO:0070848	FALSE	5.09E-46	45.2932	721	3059	131	78724	TWF2,GAB1,TNFRSF1B,HTRA3,CTNNB1,RNF111,CD63,MAPK1,BMP2,OPRD1,GRB10,MAPKAPK2,GRB2,PRKD2,SORT1,PXN,CREBBP,IL1B,ACAP2,PDGFRB,SAP30,IER2,CORO1A,SPINT1,SMPD3,SHC1,SAP30L,EHD4,CYFIP1,SMAD1,FOLR1,SPHK1,HSPB1,APAF1,DDIT3,SRD5A1,PTPN12,MAPK14,EHD1,DUSP3,PPARG,FSTL1,STRAP,HIF1A,DUSP6,FAM89B,RAB35,SAP130,STK16,INPP5K,GALNT3,SORL1,NPTN,PDPK1,FOXO3,CRKL,NDST1,TGFBR1,SFRP1,PAX6,CBL,CD44,HSPA1A,MAPK7,APLN,CHST1…
GO:BP	angiogenesis	GO:0001525	FALSE	5.62E-46	45.2499	547	3059	114	78724	HK2,EMILIN2,GAB1,CTNNB1,JMJD6,GRN,KLF5,TNFRSF12A,CAMP,SEMA4A,CEACAM1,HPSE,SYK,HDAC5,PRKD2,EPN1,SRPK2,CCM2,C3AR1,IL1B,MAP3K3,PDGFRB,KLF2,HIF3A,EGLN1,SHC1,TGFBI,VPS4B,TNFSF12,COL8A2,SMAD1,QKI,STK4,ACTG1,ANG,VAV3,HS6ST1,AAMP,PTPN6,RTN4,SPHK1,HSPB1,RLN2,C5AR1,MAPK14,BRCA1,YWHAZ,RHOB,EFNB2,BSG,PPARG,SLC12A6,HIF1A,ITGB2,SHB,CXCR4,SP1,PROK2,EPAS1,TYMP,EFNA3,HIPK1,ADIPOR2,PDPK1,TGFBR1,SFRP1,ALOX5,TEK,MAP…
GO:BP	response to molecule of bacterial origin	GO:0002237	FALSE	6.83E-46	45.1658	357	3059	93	78724	CASP1,UPF1,TNFRSF1B,MGST2,TICAM1,AKIRIN2,NLRP3,MAPK1,CD68,FOSL2,CAMP,S100A8,MAPKAPK2,HDAC5,PYCARD,TSPO,JAK2,HADHB,TLR5,BTK,IL1B,MMP8,CARD16,CEBPB,S100A9,CARD8,TLR2,LY86,LTF,NR1H3,TLR1,SLPI,IFNAR1,DEFA4,NFKBIB,BPI,IRAK3,PAF1,CTR9,CD274,TRAF6,MYD88,C5AR1,PRDX2,MAPK14,CXCL1,TRIM5,CMPK2,LY96,CEBPE,CASP9,MMP9,MPO,VIM,LYN,TIRAP,MAPKAPK3,HCK,CARD9,GSTP1,TRIM41,TLR6,ELANE,CSF2RB,GFER,CNP,ZFP36,ADAM17,NOS…
GO:BP	phagocytosis	GO:0006909	FALSE	7.18E-46	45.1441	241	3059	78	78724	CYBA,TYROBP,DYSF,FCN1,RAB7A,JMJD6,RAC1,UNC13D,PRKCD,APOA1,VAV1,SYK,RHOG,CEACAM4,FCER1G,CFP,ATG3,PYCARD,FGR,BTK,BIN2,CORO1A,TLR2,PLSCR1,NR1H3,ELMO2,VAV3,CLN3,ARL8B,SPHK1,MYD88,CSK,CD300LF,ANXA11,ICAM3,NCF2,PPARG,EIF2AK1,ITGB2,MYO7A,CEBPE,PTX3,CD300A,LMAN2,LYN,GSN,HCK,NCF4,ELANE,RAB5A,ITGAM,ICAM5,CNN2,SLC48A1,LRP1,ANXA3,RAB27A,CCR2,ANO6,SLC11A1,CD14,TM9SF4,F2RL1,CALR,PLD2,PAK1,CLCN3,GAS6,XKR8,CD93,…
GO:BP	mitotic cell cycle process	GO:1903047	FALSE	7.49E-46	45.1257	745	3059	133	78724	MIIP,KLHDC8B,NSFL1C,CCND3,PTEN,DYNLT1,ANAPC11,UBE2S,EXOC3,BCL6,FBXW11,MAP1S,CDKN2C,SMARCD3,AURKAIP1,REEP4,MTMR3,IL1B,CHMP4B,CHMP2A,PDGFRB,PSME1,APP,PHF13,CENPK,CHMP1A,BRD4,SMPD3,UBXN2B,ARF1,VPS4B,NUSAP1,JTB,DCTN2,PSME2,SPAST,PPP1R10,RB1,PTPN6,INHBA,CTDSP1,SPHK1,KLHL18,RAD9A,INSC,BRCA1,FZR1,UBE2A,RHOB,E2F3,PPM1D,PKD1,CCNI,RAN,MAP4,RAB35,GFI1B,MAPRE1,EXOC6,RAE1,DUSP1,DAPK3,NDE1,PAX6,BAZ1B,ZMPSTE24,…
GO:BP	nucleobase-containing small molecule metabolic process	GO:0055086	FALSE	1.19E-45	44.9231	673	3059	126	78724	NDUFB1,HK2,GSK3A,HK3,NDUFS2,TP53I3,PGD,GTPBP1,MAPK1,GPD2,PDK3,FAR2,RPIA,SMPDL3A,NDUFB4,TKT,LIPA,NDUFA1,TSPO,HMGCR,UPP1,PGM1,ARL2,PRKACA,SLC27A2,APP,GMPR2,SLC25A22,TJP2,NT5C2,HSD17B4,G6PD,ACOT8,NMNAT1,ACSBG1,PINK1,TALDO1,ACSL3,PSEN1,UGGT1,MGAT1,NDUFV2,NDUFC1,ACSS2,ABCC6,RBKS,PGLS,NDUFC2,EIF6,ENTPD1,IMPDH1,TPI1,PIPOX,DGAT1,MPP1,TPST1,SUCLG1,ALDOA,ATP6V0C,PPCDC,TPST2,DPYD,HIF1A,ACSF2,CMPK2,PDK4,FBP1…
GO:BP	macroautophagy	GO:0016236	FALSE	2.51E-45	44.5996	362	3059	93	78724	VPS37B,CTSD,GSK3A,NSFL1C,ZFYVE1,QSOX1,ATP6V0E1,TOM1,RAB7A,WIPI1,VPS26B,ARHGAP26,ATP6V0A1,ATG9A,TBC1D14,RAB3GAP2,VPS37C,SESN2,ATG3,TSPO,SNAP29,MTMR3,CHMP4B,CHMP2A,ATP6V1E1,PRKACA,CHMP1A,UBXN2B,VPS4B,MFN2,VPS39,PINK1,PSEN1,SNX32,CLN3,ARL8B,PHF23,CDK5R1,TRAF6,VPS16,ATP6V0D1,CALCOCO2,STAM2,ZDHHC19,NBR1,UBE2A,VPS35,RNF31,VTA1,GABARAP,ATP6V0C,EIF2AK1,HIF1A,TCIRG1,VAMP8,GAPDH,TBC1D25,ATG4B,WAC,UFC1,ATG1…
GO:BP	monoatomic cation homeostasis	GO:0055080	FALSE	3.10E-45	44.5084	606	3059	119	78724	CYBA,TRPC6,ATP6V0E1,DIAPH1,RAB7A,RNASEK,MAPK1,NDFIP1,ATP6V0A1,GRN,BTBD9,SLC9A1,VDR,LAMP1,HERPUD1,UBASH3B,ASPH,CCL23,GHITM,ATP6AP1,PRKACA,SLC31A2,APP,SLC24A3,CORO1A,MT1F,EGLN1,CCDC22,SLC12A9,ARF1,SLC4A8,SLC8A1,FBXL5,DMXL2,ATP1B3,BAK1,PSEN1,PDZD8,ABCC6,ACO1,CLN3,PTPN6,P2RX1,ATP6V0D1,DDIT3,SLC9A8,CNNM4,SLC40A1,HEXB,KCNJ2,STEAP4,SLC30A1,ATOX1,ATP6V0C,NUBP1,EIF2AK1,SLC12A6,HIF1A,PDK4,COMT,TCIRG1,EPAS1…
GO:BP	regulation of apoptotic signaling pathway	GO:2001233	FALSE	3.21E-45	44.4931	380	3059	95	78724	NACC2,CTNNB1,NRG1,RIPK3,CTSS,TNFRSF12A,PRKCD,S100A8,HERPUD1,RBCK1,PYCARD,JAK2,GHITM,GNAI2,IL1B,S100A9,STYXL1,PTTG1IP,PLAUR,TNFSF12,PINK1,STK4,BAK1,TRAF7,PSEN1,UBB,RB1,STK3,INHBA,HSPB1,APAF1,DDIT3,RAD9A,PRDX2,BRCA1,P4HB,PPARG,RFFL,HIF1A,LTBR,ZNF385A,NANOS3,SP1,TMBIM1,MMP9,SIAH2,TGFBR1,SFRP1,GRINA,HNRNPK,CD44,HSPA1A,MAPK7,DEDD2,GSTP1,TLR6,BID,PRELID1,ICAM1,PIAS4,CTSH,FBXW7,TNFSF10,MDM2,BMPR1B,PARL,…
GO:BP	DNA damage response	GO:0006974	FALSE	8.67E-45	44.0618	908	3059	146	78724	NACC2,SHISA5,NEK4,UPF1,TNFRSF1B,RNF111,BCL6,RFC2,FBXO6,RAD23A,MAPK1,GNB1L,TFIP11,MAP2K6,SMARCD3,PRKCD,CETN2,TADA2B,WAS,NCOA6,MAPKAPK2,PARP10,GRB2,SESN2,ASCC1,MPND,BACH1,PYCARD,CREBBP,RNF138,FBXO45,CCDC13,BATF,PHF13,BRD4,MSH6,RUVBL2,PTTG1IP,RMI1,BAK1,PSEN1,PARP9,VCPIP1,PPP1R10,CEP63,INO80C,DTX3L,VAV3,NDRG1,TRIM28,TRAF6,DDIT3,RAD9A,MAPK14,TADA3,BRCA1,BRAT1,FZR1,ACTR2,UBE2A,PPM1D,ZNF385A,PRPF19,CASP…
GO:BP	lipid localization	GO:0010876	FALSE	9.36E-45	44.0287	456	3059	103	78724	CES1,RETN,RXRA,STAR,APOL2,APOL1,ATP11A,MAP2K6,RBP7,SLC66A2,ATG9A,PLIN3,PRKCD,APOA1,C2CD2L,CEACAM1,SYK,GM2A,LIPA,TSPO,SLC2A1,OSBPL5,IL1B,SLC27A2,TMEM30A,VPS4B,PLSCR1,NR1H3,PSAP,OSBPL11,ACSL3,PDZD8,LAMTOR1,SLC10A3,LRP10,CLN3,ARL8B,IRS2,PNPLA2,INHBA,ABCA13,SPNS3,OSBPL1A,EHD1,PITPNM1,PPARG,TEX2,COMT,GPS2,SLC25A11,APOBR,DBI,SERAC1,PLA2G4A,LYN,PROCA1,STARD3,PITPNA,ZDHHC5,GRAMD1A,MFSD2A,ANXA2,SCARB2,NPC…
GO:BP	intracellular monoatomic ion homeostasis	GO:0006873	FALSE	1.12E-44	43.9491	533	3059	111	78724	CYBA,TRPC6,ATP6V0E1,DIAPH1,RAB7A,RNASEK,MAPK1,NDFIP1,ATP6V0A1,GRN,SLC9A1,VDR,LAMP1,HERPUD1,UBASH3B,ASPH,CCL23,TBXAS1,GHITM,ATP6AP1,PRKACA,SLC31A2,APP,SLC24A3,CORO1A,MT1F,EGLN1,CCDC22,ARF1,SLC4A8,SLC8A1,FBXL5,DMXL2,ATP1B3,BAK1,PSEN1,PDZD8,ACO1,CLN3,PTPN6,P2RX1,ATP6V0D1,DDIT3,SLC9A8,CNNM4,SLC40A1,HEXB,KCNJ2,STEAP4,SLC30A1,ATOX1,ATP6V0C,NUBP1,HIF1A,TCIRG1,GSTO1,NPTN,LYN,KCNE3,PDPK1,GRINA,ABCB6,CALM3…
GO:BP	negative regulation of cell population proliferation	GO:0008285	FALSE	4.72E-44	43.3259	706	3059	127	78724	NACC2,CEBPA,PTEN,ASCL2,TYROBP,WDR13,IFITM1,CTNNB1,TESC,ADORA3,BCL6,INPP5D,NDFIP1,IFI30,CDKN2C,VDR,BMP2,CSF1R,CEACAM1,PARP10,ATF5,TMEM127,ASPH,TSPO,JAK2,CCL23,BTK,IL1B,CTNNBIP1,CEBPB,APP,TNFRSF8,SPINT1,NF2,TLR2,MFN2,HLA-E,TES,SMAD1,STK4,BAK1,ANG,EIF2AK2,IRF1,RB1,STK3,PTPN6,NDRG1,INHBA,IFNK,CD274,CSK,CXCL1,TNFRSF14,LILRB4,EFNB2,PPARG,E2F3,PPM1D,EIF2AK1,RC3H1,INSL3,CTBP2,MAP2K1,CD300A,EFEMP2,LYN,VSI…
GO:BP	negative regulation of cytokine production	GO:0001818	FALSE	5.80E-44	43.2363	292	3059	83	78724	LAPTM5,ELF4,LILRA5,TYROBP,EXTL3,BCL6,ARRB1,INPP5D,NDFIP1,HOMER3,RAC1,PGLYRP1,APOA1,CEACAM1,TLR8,PYCARD,TSPO,BTK,PRKACA,CARD16,KLF2,CARD8,HLA-F,LTF,QKI,ANXA4,JAK3,BPI,IRAK3,PTPN6,INHBA,GBP1,CD274,ORM1,CSK,DDIT3,CMKLR1,LILRB4,NLRX1,IL1R2,NLRP6,PPM1B,MUL1,NPTN,VSIR,NLRP12,DICER1,MORC3,GSTP1,CLEC4A,BST2,TLR6,ELANE,ZFP36,MEFV,LGALS12,BANF1,GPATCH3,EPHB2,SLC11A1,OAS1,IL37,ARG1,PML,F2RL1,IL10,DHX58,RPS6…
GO:BP	nucleoside phosphate metabolic process	GO:0006753	FALSE	9.05E-44	43.0434	646	3059	121	78724	NDUFB1,HK2,GSK3A,HK3,NDUFS2,TP53I3,PGD,GTPBP1,GPD2,PDK3,FAR2,RPIA,SMPDL3A,NDUFB4,TKT,LIPA,NDUFA1,TSPO,HMGCR,UPP1,PGM1,ARL2,PRKACA,SLC27A2,APP,GMPR2,SLC25A22,TJP2,NT5C2,HSD17B4,G6PD,ACOT8,NMNAT1,ACSBG1,PINK1,TALDO1,ACSL3,PSEN1,UGGT1,MGAT1,NDUFV2,NDUFC1,ACSS2,ABCC6,RBKS,PGLS,NDUFC2,EIF6,ENTPD1,IMPDH1,TPI1,PIPOX,DGAT1,MPP1,TPST1,SUCLG1,ALDOA,ATP6V0C,PPCDC,TPST2,DPYD,HIF1A,ACSF2,CMPK2,PDK4,FBP1,ELOVL…
GO:BP	monocarboxylic acid metabolic process	GO:0032787	FALSE	1.13E-43	42.9466	616	3059	118	78724	CES1,HK2,HK3,SLC16A3,STAR,PGD,HSD3B7,PDK3,MGST3,AKR1A1,CEACAM1,GBA2,LIPA,LYPLA2,SESN2,TBXAS1,HADHB,IL1B,PGM1,DEGS1,ARL2,PRKACA,SLC27A2,APP,AOAH,ALOXE3,HSD17B4,ACOT8,NR1H3,ACSBG1,SCPEP1,QKI,ACSL3,PSEN1,HADHA,ACSS2,WDTC1,CBR1,IRS2,ACADVL,PLA2G15,ERLIN1,EIF6,TPI1,OSBPL1A,MAPK14,ASAH1,ABHD3,ECHDC3,BRCA1,ALDOA,PPARG,AIG1,HIF1A,ACSF2,PDK4,COMT,ABHD2,FBP1,ACAA1,ELOVL3,ALDH1A1,LDHD,UBR4,GALK1,GAPDH,DBI,P…
GO:BP	negative regulation of cell differentiation	GO:0045596	FALSE	1.71E-43	42.7665	671	3059	123	78724	SEMA4D,GSK3A,CEBPA,PTEN,DYNLT1,ASCL2,LOXL3,JDP2,CTNNB1,EXTL3,BCL6,MAPK1,INPP5D,DIP2B,PGLYRP1,BMP2,CEACAM1,KIAA0319,HDAC5,MAFB,UBASH3B,ANKRD2,TSPO,SORT1,IL1B,LGALS1,APP,NF2,G6PD,ESRRB,LTF,NR1H3,HLX,SMAD1,QKI,PSEN1,IRF1,CXCL14,JAK3,RB1,CHADL,KDM4A,INHBA,PAF1,RTN4,CTDSP1,FGL2,CTR9,DDIT3,PRDX2,NBR1,LILRB4,SUFU,PPARG,MBD1,SHB,RC3H1,GPS2,STAT5A,MMP9,SORL1,LYN,FOXO3,TGFBR1,SFRP1,PAX6,DICER1,HDAC4,CTDP1,…
GO:BP	wound healing	GO:0042060	FALSE	1.93E-43	42.7134	433	3059	99	78724	EMILIN2,PTEN,F11R,NRG1,GLA,TNFRSF12A,F12,PRKCD,ITPK1,TOR1A,WAS,CEACAM1,VAV1,HPSE,SYK,FCER1G,UBASH3B,CD151,FERMT3,JAK2,SERPINA1,CHMP4B,CHMP2A,CHMP1A,DGKG,PLAUR,VPS4B,PLSCR1,STXBP3,HPS6,ACTG1,ANXA5,VAV3,ARL8B,PTPN6,GGCX,P2RX1,ENTPD1,HSPB1,PRDX2,MAPK14,PPARG,TFPI,HIF1A,F5,MMRN1,CXCR4,NLRP6,INSL3,PLA2G4A,LYN,ADIPOR2,TGFBR1,ALOX5,CD44,PAPSS2,CD59,ANXA2,CHMP1B,CORO1B,PIK3CG,ADAM17,CNN2,ACVRL1,DGKD,ST3G…
GO:BP	regulation of proteolysis	GO:0030162	FALSE	2.01E-43	42.6975	406	3059	96	78724	NLRC4,LAPTM5,GSK3A,CEBPA,PTEN,PSENEN,TNFRSF1B,TSPAN17,RAD23A,FBXW11,GRN,F12,TIMP2,AURKAIP1,HERPUD1,IST1,ASPH,IL1B,SERPINB8,PRKACA,PSME1,CCDC22,PLAUR,NR1H3,QRICH2,PINK1,PSME2,BAK1,TRAF7,PSEN1,APH1B,RNF185,UBB,CLN3,CST7,FZR1,SERPINB6,SUFU,GABARAP,TFPI,IL1R2,USP25,PKD1,CSTA,PSMC3,CLEC3B,GAPDH,EFNA3,LYN,VSIR,GSN,WAC,HSPA1A,PSMC5,ANXA2,SEMG1,SNX12,PRELID1,TTC36,USP19,NEDD8,LRP1,CTSH,FBXW7,MDM2,PARL,FM…
GO:BP	regulation of endocytosis	GO:0030100	FALSE	2.50E-43	42.6017	297	3059	83	78724	CYBA,RIN3,DYSF,NRG1,FCN1,ARRB1,CD63,RAC1,BTBD9,APOA1,TOR1A,SYK,FCER1G,ANKRD13D,AP2S1,CD151,MCTP1,CFP,ATG3,PYCARD,FGR,BTK,TLR2,ARF1,EHD4,PLSCR1,NR1H3,ACTG1,LRPAP1,CLN3,ABCA13,SPHK1,CSK,CD300LF,EFNB2,PPARG,PACSIN2,RAB21,PICK1,PTX3,CD300A,AP2M1,LMAN2,CBL,HNRNPK,HCK,APLN,ANXA2,MIB1,SNX12,CNN2,DGKD,TSG101,LRP1,RAB27A,ANO6,SLC11A1,CD14,SELE,MDM2,B2M,FMR1,VEGFA,F2RL1,PICALM,ARPC3,AP2A1,CALR,SDCBP,GAS6,Z…
GO:BP	establishment of organelle localization	GO:0051656	FALSE	2.78E-43	42.5566	491	3059	105	78724	NSFL1C,DYNLT1,EXOC3,CTNNB1,RAB7A,WIPI1,FBXW11,MAP1S,UNC13D,TRAPPC3,TOR1A,LAMP1,SYK,STXBP2,FGR,SNAP29,BTK,CHMP4B,CHMP2A,CHMP1A,SMPD3,UBXN2B,VPS4B,NUSAP1,KIF13A,PINK1,DCTN2,SPAST,PSEN1,UBB,RB1,CLN3,EIF6,TRAPPC5,RAC2,INSC,YWHAZ,TRAPPC9,PKD1,SYNJ1,HIF1A,MYO7A,TCIRG1,RAN,VAMP8,ARFGAP2,FES,MAP4,GAB2,CD300A,MAPRE1,EXOC6,LYN,PDPK1,LIN7A,LAT2,NDE1,STARD3,PAX6,CBL,BUB3,CHMP1B,CEP19,HOOK3,PIK3CG,LIMK2,CLMN,…
GO:BP	leukocyte proliferation	GO:0070661	FALSE	2.81E-43	42.5515	355	3059	90	78724	CCND3,ELF4,TYROBP,TNFRSF1B,TICAM1,CTNNB1,RIPK3,BCL6,SASH3,MAPK1,INPP5D,NDFIP1,FOSL2,PRKCD,CSF1R,SYK,LIPA,CD151,TNFSF18,PYCARD,JAK2,BTK,IL1B,CEBPB,CORO1A,CSF2RA,HLA-E,IRF1,VAV3,IRS2,CLC,PTPN6,TYK2,IFNK,CD274,TRAF6,MYD88,RAC2,PRDX2,TNFRSF14,MSN,LILRB4,HLA-A,SHB,RC3H1,TCIRG1,TNFSF14,CD300A,LYN,VSIR,TIRAP,GSTP1,BST2,BID,CSF2RB,PIK3CG,STAT5B,CNN2,LGALS12,ZBTB7B,CCR2,EPHB2,SLC11A1,FCGR3A,ARG1,PSMB10,BA…
GO:BP	response to lipopolysaccharide	GO:0032496	FALSE	3.52E-43	42.453	339	3059	88	78724	CASP1,UPF1,TNFRSF1B,MGST2,TICAM1,AKIRIN2,NLRP3,MAPK1,CD68,FOSL2,CAMP,S100A8,MAPKAPK2,HDAC5,PYCARD,TSPO,JAK2,HADHB,TLR5,BTK,IL1B,MMP8,CARD16,CEBPB,S100A9,CARD8,TLR2,LY86,LTF,NR1H3,SLPI,IFNAR1,DEFA4,NFKBIB,BPI,IRAK3,PAF1,CTR9,CD274,TRAF6,MYD88,PRDX2,MAPK14,CXCL1,TRIM5,CMPK2,LY96,CEBPE,CASP9,MMP9,MPO,VIM,LYN,TIRAP,MAPKAPK3,HCK,GSTP1,TRIM41,ELANE,CSF2RB,GFER,CNP,ZFP36,ADAM17,NOS1,HSF1,SCIMP,PABPN1,MA…
GO:BP	lipid transport	GO:0006869	FALSE	3.74E-43	42.4266	436	3059	99	78724	CES1,RETN,RXRA,STAR,APOL2,APOL1,ATP11A,MAP2K6,RBP7,SLC66A2,ATG9A,PRKCD,APOA1,C2CD2L,CEACAM1,SYK,GM2A,LIPA,TSPO,SLC2A1,OSBPL5,IL1B,SLC27A2,TMEM30A,VPS4B,PLSCR1,NR1H3,PSAP,OSBPL11,ACSL3,PDZD8,LAMTOR1,SLC10A3,LRP10,CLN3,ARL8B,IRS2,INHBA,ABCA13,SPNS3,OSBPL1A,PITPNM1,PPARG,TEX2,COMT,GPS2,SLC25A11,APOBR,DBI,SERAC1,PLA2G4A,LYN,PROCA1,STARD3,PITPNA,ZDHHC5,GRAMD1A,MFSD2A,ANXA2,SCARB2,NPC2,PRELID1,CLPTM1L,…
GO:BP	negative regulation of transcription by RNA polymerase II	GO:0000122	FALSE	4.87E-43	42.3123	938	3059	146	78724	SEMA4D,MAFG,NACC2,CCND3,CEBPA,MIER2,ASCL2,JDP2,CTNNB1,RXRA,WWP2,DEAF1,AKIRIN2,BCL6,HCLS1,PLAGL1,KLF5,VDR,BMP2,HDAC5,MAFB,KLF16,NACC1,ANKRD2,NFIL3,BACH1,ATXN1L,CREBBP,MEF2A,CTNNBIP1,SPI1,NR6A1,SAP30,TLE4,CEBPB,KLF2,ZBTB45,SAP30L,ZGLP1,NR1H3,PSEN1,CUX1,ATXN1,PARP9,RB1,WDTC1,PAF1,TRIM28,MXD3,CTR9,TRAF6,DDIT3,TBL1X,TADA3,YWHAZ,NCOR2,PHF21A,SUFU,PPARG,CNBP,STRAP,NCOA2,FBP1,TCP10L,GPS2,LCOR,CTBP2,SOX1,…
GO:BP	positive regulation of MAPK cascade	GO:0043410	FALSE	5.09E-43	42.2929	456	3059	101	78724	NCF1,LAMTOR2,LAPTM5,DOK1,S100A12,LILRA5,CTNNB1,NRG1,ARRB1,MAP2K6,BMP2,CSF1R,SYK,PRKD2,PYCARD,JAK2,GNAI2,IL1B,MAP3K3,SPI1,PDGFRB,DOK3,APP,DOK4,SHC1,NMNAT1,MAP3K5,PIK3R5,TRAF7,EIF2AK2,LAMTOR1,STK3,INHBA,SPHK1,TRAF6,MYD88,C5AR1,PRDX2,MFAP3,NAIP,TRIM5,LTBR,DOK2,MAP2K1,LYN,CRKL,NDST1,MAP3K11,TIRAP,CD44,TEK,CARD9,ARHGEF5,TLR6,ELANE,PIK3CG,MAP3K10,PDE6H,ICAM1,GPBAR1,IGF1R,SCIMP,NOTCH2,FBXW7,MAP2K3,ZNF62…
GO:BP	cellular response to growth factor stimulus	GO:0071363	FALSE	5.57E-43	42.2541	689	3059	124	78724	TWF2,GAB1,TNFRSF1B,HTRA3,CTNNB1,RNF111,CD63,BMP2,OPRD1,GRB10,MAPKAPK2,GRB2,PRKD2,SORT1,PXN,CREBBP,IL1B,ACAP2,PDGFRB,SAP30,CORO1A,SPINT1,SMPD3,SHC1,SAP30L,EHD4,CYFIP1,SMAD1,FOLR1,SPHK1,HSPB1,APAF1,SRD5A1,PTPN12,MAPK14,EHD1,DUSP3,PPARG,FSTL1,STRAP,HIF1A,FAM89B,RAB35,SAP130,STK16,INPP5K,GALNT3,SORL1,NPTN,PDPK1,FOXO3,CRKL,NDST1,TGFBR1,SFRP1,PAX6,CBL,CD44,HSPA1A,MAPK7,APLN,CHST11,ZMIZ1,SNX6,FKBP1A,COR…
GO:BP	intracellular monoatomic cation homeostasis	GO:0030003	FALSE	5.91E-43	42.2283	524	3059	108	78724	CYBA,TRPC6,ATP6V0E1,DIAPH1,RAB7A,RNASEK,MAPK1,NDFIP1,ATP6V0A1,GRN,SLC9A1,VDR,LAMP1,HERPUD1,UBASH3B,ASPH,CCL23,GHITM,ATP6AP1,PRKACA,SLC31A2,APP,SLC24A3,CORO1A,MT1F,EGLN1,CCDC22,ARF1,SLC4A8,SLC8A1,FBXL5,DMXL2,ATP1B3,BAK1,PSEN1,PDZD8,ACO1,CLN3,PTPN6,P2RX1,ATP6V0D1,DDIT3,SLC9A8,CNNM4,SLC40A1,HEXB,KCNJ2,STEAP4,SLC30A1,ATOX1,ATP6V0C,NUBP1,HIF1A,TCIRG1,GSTO1,NPTN,LYN,PDPK1,GRINA,ABCB6,CALM3,TTC7A,ELANE,…
GO:BP	regulation of body fluid levels	GO:0050878	FALSE	7.13E-43	42.1472	376	3059	92	78724	CYBA,HK2,COPA,EMILIN2,F11R,GLA,FOSL2,F12,VDR,PRKCD,ITPK1,WAS,CEACAM1,VAV1,HPSE,SYK,FCER1G,UBASH3B,FLI1,FERMT3,JAK2,SERPINA1,GNAI2,PRKACA,DGKG,PLAUR,PLSCR1,NR1H3,STXBP3,HPS6,ACTG1,ANXA5,VAV3,PTPN6,GGCX,P2RX1,CEL,ENTPD1,HSPB1,PRDX2,MAPK14,NCOR2,TFPI,HIF1A,ZNF385A,F5,MMRN1,NLRP6,STAT5A,VAMP8,CHRM3,INPP5K,PLA2G4A,LYN,NFE2,PAPSS2,CD59,APLN,ANXA2,PIK3CG,STAT5B,DGKD,ST3GAL4,ZBTB7B,PROC,SLC29A1,SERPING1,…
GO:BP	adaptive immune response based on somatic recombination of immune receptors built from immunoglobulin superfamily domains	GO:0002460	FALSE	7.80E-43	42.1079	394	3059	94	78724	ASCL2,LOXL3,TNFRSF1B,RIPK3,BCL6,NLRP3,IL17RA,SASH3,INPP5D,NDFIP1,UNC13D,PRKCD,SECTM1,SEMA4A,WAS,CR1L,CEACAM1,YWHAG,TLR8,FCER1G,JAK2,BTK,IL1B,LGALS1,BATF,PVR,BRD4,FUT7,MSH6,HLA-F,HLA-E,TNFSF12,HLX,JAK3,CLC,C1RL,PTPN6,TYK2,CD274,TRAF6,SLC15A4,MYD88,LILRB4,HLA-A,RC3H1,TCIRG1,STAT5A,PLA2G4A,UNC93B1,RSAD2,CARD9,C1QA,CSF2RB,JAG1,ADAM17,ICAM1,C17ORF99,ZBTB7B,CTSH,SERPING1,RAB27A,CCR2,EPHB2,SLC11A1,FCGR3…
GO:BP	regulation of secretion	GO:0051046	FALSE	8.13E-43	42.0897	617	3059	117	78724	CYBA,CES1,DYSF,TNFRSF1B,RETN,NRG1,RPH3AL,ADORA3,RAB7A,MAP4K4,MAP2K6,UNC13D,BMP2,C2CD2L,LAMP1,S100A8,CEACAM1,SYK,STXBP2,MCTP1,FGR,TSPO,JAK2,HMGCR,GNAI2,IL1B,FBXO45,CHMP2A,SPI1,PTPN23,PRKACA,SLC25A22,SMPD3,TLR2,VPS4B,SLC4A8,HLA-F,NR1H3,STXBP3,PINK1,MCTP2,ACSL3,ANG,SLC38A2,PRAM1,IRS2,P2RX1,INHBA,SIDT2,RAC2,VPS35,SLC30A1,BSG,GPR27,PPARG,HIF1A,ITGB2,TCIRG1,NLRP6,VAMP8,RAB21,FES,CHRM3,GAB2,PICK1,CD300A…
GO:BP	localization within membrane	GO:0051668	FALSE	1.76E-42	41.7552	924	3059	144	78724	NCF1,NDUFB1,VPS37B,LMTK2,DENND1A,RAB32,F11R,ZDHHC12,FLOT2,TESC,RAB7A,VPS26B,CD53,RAC1,RAB13,CLSTN1,ARHGAP1,FRMD8,RAB3GAP2,RHOG,VPS37C,TM9SF2,RAB10,ATG3,SNX27,OSBPL5,AKAP5,ATP6AP1,CHMP4B,ACAP2,PTPN23,CCDC22,EHD4,VPS39,PSAP,KIF13A,ATP1B3,HPS6,ACSL3,LAMTOR1,PRAM1,CLN3,ZDHHC3,CDK5R1,MYADM,GBP1,TRAF6,CSK,CACNG8,TMEM88,ZDHHC19,SAMM50,EHD1,VPS35,HSP90AA1,SLC30A1,BSG,GABARAP,PPP2R5A,ITGB2,VAMP8,TMBIM1,KC…
GO:BP	positive regulation of leukocyte activation	GO:0002696	FALSE	2.08E-42	41.6828	363	3059	90	78724	CEBPA,TYROBP,FLOT2,TICAM1,AKIRIN2,BCL6,NLRP3,SASH3,INPP5D,SMARCD3,YWHAG,VAV1,SYK,PYCARD,JAK2,BTK,IL1B,MMP8,SPI1,LGALS1,CORO1A,BRD4,HLA-E,TNFSF12,HLX,VAV3,IRS2,PTPN6,TYK2,CD274,TRAF6,MYD88,CSK,TNFRSF14,LILRB4,HLA-A,EFNB2,SHB,TNFSF14,PLA2G4A,LYN,VSIR,PDPK1,FOXO3,TIRAP,TLR6,ZMIZ1,STAT5B,ZBTB7B,CCR2,EPHB2,AP3D1,FCGR3A,B2M,SH3KBP1,ADAM8,CD4,IL10,FADD,GAS6,IL4R,BRD2,LRRK2,BLOC1S3,CLEC4D,MPL,TTBK1,DNAJA…
GO:BP	small molecule biosynthetic process	GO:0044283	FALSE	2.80E-42	41.5527	593	3059	114	78724	CES1,NLRC4,CHST15,CYB5R3,CASP1,MGST2,STAR,PGD,PDXK,MAPK1,HSD3B7,ITPKC,BMP2,APOA1,MGST3,AKR1A1,CEACAM1,SYK,LIPA,SESN2,PYCARD,HMGCR,TBXAS1,IL1B,PGM1,DEGS1,PRKACA,SLC27A2,ALOXE3,PCBD1,G6PD,ACOT8,NR1H3,ACSBG1,QKI,LBR,ACSS2,WDTC1,CBR1,CLN3,ACADVL,ERLIN1,INHBA,EIF6,SPHK1,TPI1,OSBPL1A,SDSL,ASAH1,COQ2,ABHD3,BRCA1,IP6K1,CSAD,NAIP,PLOD3,DPYD,CRTC2,PDK4,ABHD2,FBP1,ELOVL3,PLOD2,ALDH1A1,CBS,SLC25A11,UBR4,PGAM…
GO:BP	cellular response to biotic stimulus	GO:0071216	FALSE	3.85E-42	41.4149	252	3059	76	78724	CASP1,UPF1,TNFRSF1B,TICAM1,NLRP3,MAPK1,CD68,CAMP,SYK,HDAC5,PYCARD,TSPO,JAK2,HADHB,TLR5,BTK,IL1B,MMP8,PPP1R15B,CARD16,CARD8,TLR2,LY86,LTF,NR1H3,TLR1,DEFA4,NFKBIB,BPI,IRAK3,PAF1,CTR9,CD274,TRAF6,MYD88,APAF1,DDIT3,PRDX2,MAPK14,CXCL1,TRIM5,CMPK2,LY96,CEBPE,MMP9,CDA,VIM,LYN,TIRAP,ZMPSTE24,HCK,GSTP1,TRIM41,TLR6,GFER,ZFP36,HSF1,SCIMP,NOTCH2,PABPN1,MAP2K3,EPHB2,CD14,IL37,TRIB1,IL10,GBP2,CASP7,SLC7A5,NLRP…
GO:BP	DNA metabolic process	GO:0006259	FALSE	5.34E-42	41.2727	1005	3059	150	78724	UPF1,CTNNB1,RNF111,BCL6,RFC2,FBXO6,RAD23A,MAPK1,NDFIP1,SMG5,TFIP11,DNASE2,SMARCD3,PRKCD,CETN2,ISG20,TADA2B,WAS,PARP10,SESN2,PRKD2,ASCC1,MPND,BACH1,CREBBP,RNF138,BATF,PDGFRB,PHF13,SMPD3,MSH6,RUVBL2,TNFSF12,NMNAT1,RMI1,EXOSC4,PARP9,VCPIP1,PPP1R10,CHRAC1,INO80C,DTX3L,TRIM28,SPHK1,SLC15A4,APAF1,RAD9A,POLE4,TADA3,BRCA1,FZR1,ACTR2,UBE2A,HSP90AA1,XRN1,CNBP,PRPF19,SMARCAL1,CBS,RAN,USP10,HNRNPC,TFPT,INO80…
GO:BP	vesicle organization	GO:0016050	FALSE	5.85E-42	41.2326	376	3059	91	78724	VPS37B,AP1B1,RAB32,TOM1,RAB7A,RNASEK,STX10,ATP6V0A1,TRAPPC3,VPS37C,AGFG1,TMEM127,IST1,SORT1,SNAP29,ATP6AP1,CHMP4B,CHMP2A,SYP,ATP6V1E1,CORO1A,CHMP1A,VPS4B,VPS39,KIF13A,HPS6,LAMTOR1,VAV3,CLN3,ARL8B,SPHK1,TRAPPC5,VPS16,ATP6V0D1,STAM2,SLC9A8,VTA1,ATP6V0C,TRAPPC9,SYNJ1,ZNF385A,YIPF4,MYO7A,VAMP8,UBR4,ARFGAP2,KCNE1,AP2M1,ABCB6,SNX11,ANXA2,CHMP1B,SCARB2,HOOK3,SQSTM1,BLOC1S1,ATP6V1A,TSG101,CHMP2B,TRAPPC1,…
GO:BP	regulation of cytoskeleton organization	GO:0051493	FALSE	6.79E-42	41.1682	517	3059	106	78724	TWF2,GSK3A,F11R,CAPG,MARK2,ARAP1,ARPC2,FKBP4,DIAPH1,CDC42EP4,FLII,MAPK1,HCLS1,RAC1,MAP1S,SLC9A1,PRKCD,APOA1,CSF1R,WAS,S100A8,GBA2,CLIP1,RHOG,GRB2,PYCARD,PXN,SVIL,CHMP4B,CHMP2A,PDGFRB,ARL2,HAUS4,S100A9,CORO1A,CHMP1A,PREX1,NF2,ARF1,VPS4B,CYFIP1,SPAST,ACTG1,FSCN1,CLN3,BRK1,CDK5R1,GMFG,MYADM,WDR1,BRCA1,NEDD9,MEGF9,NUBP1,PKD1,VASP,FES,SPTB,PICK1,AKAP13,INPP5K,SSH1,MAPRE1,RAE1,TGFBR1,SFRP1,DAPK3,GSN,HC…
GO:BP	head development	GO:0060322	FALSE	7.15E-42	41.146	806	3059	133	78724	MAP2K2,PTEN,TYROBP,AATK,CTNNB1,AKIRIN2,FBXW11,DPCD,MAPK1,MAP1S,BMP2,CSF1R,UQCRQ,NCOA6,ATF5,MAFB,ASPH,ATXN1L,NUMBL,SLC2A1,GNB4,FBXO45,APP,CLP1,NF2,CRISPLD1,G6PD,STXBP3,SMAD1,PADI2,PSEN1,UBB,SLC38A2,ATXN1,MBOAT7,IRS2,CRISPLD2,INHBA,RTN4,CDK5R1,SPHK1,APAF1,SRGAP2,SRD5A1,NAPA,AKNA,NCOR2,PITPNM1,PLXNA2,TRAPPC9,HIF1A,DCLK2,COMT,CXCR4,KDM4B,COX6B1,CBS,RAN,EIF2B5,MAP2K1,KCNE1,SOX1,SGPL1,FOXO3,CRKL,NDST1,…
GO:BP	regulation of transferase activity	GO:0051338	FALSE	7.68E-42	41.1149	498	3059	104	78724	MAP2K2,NCF1,GSK3A,CCND3,PTEN,S100A12,MARK2,UBE2S,LILRA5,NRG1,MVP,SERTAD1,RIPK3,RFC2,CDKN2C,PRKCD,BMP2,APOA1,CSF1R,CEACAM1,YWHAG,PYCARD,FGR,JAK2,IL1B,PDGFRB,CAMKK2,SLC8A1,LTF,JTB,MAP3K5,PIK3R5,PINK1,PSEN1,DTX3L,RB1,IRS2,IRAK3,RGS14,CDK5R1,TRAF6,HSPB1,C5AR1,FZR1,DUSP3,LILRB4,NEDD9,MAP2K1,CD300A,INPP5K,DBI,LYN,PDPK1,DUSP1,MAP3K11,CD44,CALM3,GSTP1,ARHGEF5,TLR6,SNX6,ELANE,PIK3CG,MAP3K10,ZFP36,ADAM17,U…
GO:BP	positive regulation of cell activation	GO:0050867	FALSE	1.91E-41	40.7191	381	3059	91	78724	CEBPA,LILRA5,TYROBP,FLOT2,TICAM1,AKIRIN2,BCL6,NLRP3,SASH3,INPP5D,SMARCD3,YWHAG,VAV1,SYK,PYCARD,JAK2,BTK,IL1B,MMP8,SPI1,LGALS1,CORO1A,BRD4,HLA-E,TNFSF12,HLX,VAV3,IRS2,PTPN6,TYK2,CD274,TRAF6,MYD88,CSK,TNFRSF14,LILRB4,HLA-A,EFNB2,SHB,TNFSF14,PLA2G4A,LYN,VSIR,PDPK1,FOXO3,TIRAP,TLR6,ZMIZ1,STAT5B,ZBTB7B,CCR2,EPHB2,AP3D1,FCGR3A,B2M,SH3KBP1,ADAM8,CD4,IL10,FADD,GAS6,IL4R,BRD2,LRRK2,BLOC1S3,CLEC4D,MPL,TTBK…
GO:BP	regulation of secretion by cell	GO:1903530	FALSE	1.99E-41	40.7008	563	3059	110	78724	DYSF,TNFRSF1B,RETN,RPH3AL,ADORA3,RAB7A,MAP4K4,MAP2K6,UNC13D,BMP2,C2CD2L,LAMP1,CEACAM1,SYK,STXBP2,MCTP1,FGR,TSPO,JAK2,HMGCR,GNAI2,IL1B,FBXO45,CHMP2A,SPI1,PTPN23,PRKACA,SLC25A22,SMPD3,TLR2,VPS4B,SLC4A8,HLA-F,NR1H3,STXBP3,PINK1,MCTP2,ANG,SLC38A2,PRAM1,IRS2,P2RX1,INHBA,SIDT2,RAC2,VPS35,SLC30A1,BSG,GPR27,PPARG,HIF1A,ITGB2,TCIRG1,VAMP8,RAB21,FES,CHRM3,GAB2,PICK1,CD300A,FBXL20,PLA2G4A,LYN,PDPK1,TARDBP,S…
GO:BP	regulation of leukocyte differentiation	GO:1902105	FALSE	2.38E-41	40.6233	330	3059	85	78724	ASCL2,LOXL3,TYROBP,NFAM1,CTNNB1,TESC,BCL6,NLRP3,SASH3,HCLS1,INPP5D,NDFIP1,CD101,SMARCD3,PGLYRP1,CEACAM1,SYK,MAFB,UBASH3B,BTK,CTNNBIP1,SPI1,LGALS1,BATF,CEBPB,SLC46A2,BRD4,LTF,HLX,QKI,IRF1,JAK3,RB1,PTPN6,INHBA,FGL2,TRAF6,PRDX2,LILRB4,NEDD9,SHB,RC3H1,STAT5A,FES,LYN,VSIR,EVI2B,FOXO3,SFRP1,ZMIZ1,PRELID1,HSF1,STAT5B,NOTCH2,ZBTB7B,FBXW7,CCR2,TFE3,AP3D1,LILRB3,TRIB1,ADAM8,CD4,IL10,GPR137,FADD,GAS6,IL4R,I…
GO:BP	synaptic signaling	GO:0099536	FALSE	4.17E-41	40.3801	807	3059	132	78724	CACNA1E,GSK3A,SYNGR1,PTEN,ZDHHC12,TYROBP,DYSF,RETN,CTNNB1,RPH3AL,ADORA3,GNA15,TSHZ3,MAPK1,DNAJC5,HRH2,DBN1,BTBD9,CLSTN1,TOR1A,YWHAG,STXBP2,MCTP1,JAK2,SNAP29,HMGCR,AKAP5,GNAI2,IL1B,FBXO45,SYP,SIPA1L1,PRKACA,APP,ARF1,SLC4A8,CYFIP1,STXBP3,SYN2,PINK1,MCTP2,GNB1,PSEN1,SLC38A2,CLN3,DYTN,P2RX1,RGS14,ZDHHC3,RTN4,CDK5R1,CACNG8,NAPA,VPS35,SLC30A1,GABARAP,SLC1A7,PACSIN2,SLC12A6,SYNJ1,STAU1,COMT,RNF167,CHRM3…
GO:BP	regulation of establishment of protein localization	GO:0070201	FALSE	4.45E-41	40.352	537	3059	107	78724	CTSD,GSK3A,OS9,WWP2,RPH3AL,OAZ2,HSPA1L,LCP1,HCLS1,NDFIP1,MAP4K4,PRKCD,C2CD2L,ASPH,JAK2,HMGCR,AKAP5,IL1B,PTPN23,PRKACA,SLC25A22,TLR2,TMEM30A,NR1H3,PINK1,OAZ1,ACSL3,PSEN1,ANG,CLN3,IRS2,SIDT2,TRIM28,CDK5R1,RAC2,CSK,MAPK14,RANGAP1,VPS35,RNF31,HSP90AA1,BSG,SUFU,GPR27,PPARG,HIF1A,ITGB2,TCIRG1,RAN,CHRM3,KCNE1,PICK1,INPP5K,SORL1,TARDBP,SFRP1,ALOX5,RSAD2,UBE2J2,FAM3D,ATG13,ARHGEF5,ORAI1,DMAP1,SNX12,ITGAM,…
GO:BP	regulation of cellular response to stress	GO:0080135	FALSE	6.50E-41	40.1872	519	3059	105	78724	MAP2K2,NACC2,MAPK1,GRN,MAP4K4,TFIP11,SMARCD3,TADA2B,WAS,KIAA0319,HERPUD1,MAPKAPK2,CREBBP,EFHD1,PPP1R15B,PHF13,BRD4,RUVBL2,PTTG1IP,PRDX1,NR1H3,KREMEN1,PINK1,BAK1,RNF185,SLC38A2,EIF2AK2,PPP1R10,INO80C,CLN3,TRIM28,DDIT3,RAD9A,NBR1,TADA3,BRCA1,ACTR2,PTPRF,EIF2AK1,USP25,ZNF385A,DNAJB6,MAP2K1,TFPT,INO80B,SMCHD1,GRINA,HNRNPK,ALOX5,CD44,ZMPSTE24,ATF6,CARD9,HSPA1A,GSTP1,TERF2IP,TAF12,INSIG2,BID,DMAP1,HSF1…
GO:BP	developmental process involved in reproduction	GO:0003006	FALSE	6.59E-41	40.1813	1038	3059	151	78724	CTSB,GSK3A,ASCL2,RETN,CTNNB1,FKBP4,DEAF1,BCL6,SLCO4C1,FBXW11,DPCD,SRPK1,RAB13,SLIRP,LHFPL2,VDR,CETN2,AGFG1,TDRD9,TLR5,IL1B,PANX1,PRKACA,TDRD7,CEBPB,IGF2R,MSH6,HSD17B4,ZGLP1,SLC2A14,PSAP,QKI,STK4,BAK1,DHH,UBB,ANG,RB1,STK3,SBF1,INHBA,TRIM28,SPACDR,SLC22A16,SLC9A8,SRD5A1,C3ORF62,SLC26A8,HEXB,NDRG3,BSG,SUFU,DAZAP1,PKD1,STAU1,NANOS3,SHB,ABHD2,PROK2,ROPN1L,CCNI,RAN,INSL3,EIF2B5,DNAJB6,KCNE1,PTX3,TFPT,G…
GO:BP	exocytosis	GO:0006887	FALSE	6.94E-41	40.1587	360	3059	88	78724	SYNGR1,TMEM63B,EXOC3,RPH3AL,RAB7A,DNAJC5,RAB13,UNC13D,LAMP1,CEACAM1,SYK,STXBP2,ITSN1,RAB10,FGR,SNAP29,GNAI2,BTK,FBXO45,CHMP2A,SYP,SPI1,SYTL3,CORO1A,SMPD3,VPS4B,SLC4A8,HLA-F,STXBP3,SYN2,PSEN1,PRAM1,ARL8B,P2RX1,RAC2,SYNGR2,NAPA,SYNJ1,ITGB2,VAMP8,RAB21,FES,GAB2,CD300A,FBXL20,EXOC6,LYN,PDPK1,LIN7A,LAT2,CBL,HCK,SYN1,ANXA2,RAB5A,PIK3CG,ITGAM,LIN7B,TNFAIP2,TSG101,ANXA3,RAB27A,CCR2,FCGR3A,CDK16,FMR1,SNF8…
GO:BP	actin filament organization	GO:0007015	FALSE	7.33E-41	40.1348	461	3059	99	78724	TWF2,F11R,CAPG,ARAP1,ARPC2,DIAPH1,CDC42EP4,ARRB1,FLII,PSTPIP2,LCP1,HCLS1,MSRB2,DBN1,RAC1,SLC9A1,PRKCD,TMSB10,APOA1,WAS,GBA2,RHOG,GRB2,PYCARD,PXN,JAK2,SVIL,CORO1A,PREX1,NF2,ARF1,CYFIP1,MYO1F,ACTG1,ANG,ELMO2,FSCN1,ACTN1,ARPC1A,CAP1,BRK1,GMFG,MYADM,RAC2,WDR1,ACTR2,RHOB,NEDD9,ALDOA,MEGF9,MYO7A,CORO7,VASP,SPTB,PICK1,INPP5K,SSH1,TMSB4X,TGFBR1,SFRP1,GSN,HCK,ARHGEF5,PSTPIP1,PPFIA1,CAPZB,CORO1B,MYO7B,CNN2…
GO:BP	regulation of T cell activation	GO:0050863	FALSE	7.68E-41	40.1147	387	3059	91	78724	LAPTM5,ASCL2,LOXL3,TNFRSF1B,FLOT2,CTNNB1,RIPK3,BCL6,NLRP3,SASH3,NDFIP1,SMARCD3,YWHAG,VAV1,SYK,TNFSF18,PYCARD,JAK2,IL1B,LGALS1,BATF,CEBPB,SLC46A2,CORO1A,BRD4,HLA-E,HLX,IRF1,JAK3,CLC,PTPN6,TYK2,FGL2,CD274,TRAF6,RAC2,CSK,PRDX2,DUSP3,TNFAIP8L2,TNFRSF14,LILRB4,HLA-A,EFNB2,SHB,RC3H1,STAT5A,TNFSF14,CD300A,LYN,VSIR,PDPK1,FOXO3,ZMIZ1,BID,PRELID1,STAT5B,LGALS12,ZBTB7B,CCR2,AP3D1,ARG1,B2M,ADAM8,CD4,IL10,FAD…
GO:BP	viral life cycle	GO:0019058	FALSE	8.90E-41	40.0507	310	3059	82	78724	VPS37B,CTSB,DYNLT1,F11R,RNASEL,SELPLG,ZFYVE1,IFITM1,WWP2,RAB7A,RNASEK,RAD23A,SRPK1,SLC1A5,ISG20,LAMP1,VPS37C,PCSK5,SRPK2,CHMP4B,CHMP2A,LGALS1,SETDB1,IFITM2,PVR,CHMP1A,VPS4B,PLSCR1,LTF,SLPI,EIF2AK2,ARL8B,TRIM28,TRIM25,TNFRSF14,EFNB2,BSG,P4HB,TRIM5,STAU1,CXCR4,VAMP8,CTBP2,INPP5K,ZC3HAV1,CBL,RSAD2,TRIM34,HSPA1A,BST2,CHMP1B,NCAM1,SCARB2,PPIB,ICAM1,PCBP2,BANF1,TSG101,CCNK,CHMP2B,IFI16,OAS1,FMR1,CD4,HS…
GO:BP	cell chemotaxis	GO:0060326	FALSE	3.04E-40	39.5177	323	3059	83	78724	RIN3,S100A12,GAB1,IL17RA,MAPK1,HSD3B7,RAC1,RAB13,PRKCD,CSF1R,S100A8,VAV1,SYK,RHOG,CCRL2,FCER1G,PRKD2,MOSPD2,CCL23,C3AR1,IL1B,BIN2,PDGFRB,S100A9,CORO1A,PREX1,PADI2,ELMO2,CXCL14,VAV3,DOCK4,HSPB1,RAC2,C5AR1,MPP1,CXCL1,CMKLR1,NEDD9,BSG,ITGB2,CXCR4,TNFSF14,LYN,TMSB4X,DUSP1,CRKL,TIRAP,ALOX5,OXSR1,ARHGEF5,CORO1B,PIK3CG,ADAM17,PPIB,CCR2,ANO6,DAPK2,VEGFA,ADAM8,CXCL16,F2RL1,IL10,FGF16,CALR,PLA2G7,GAS6,NINJ…
GO:BP	homeostasis of number of cells	GO:0048872	FALSE	3.47E-40	39.4593	332	3059	84	78724	RIPK3,BCL6,JMJD6,SASH3,HCLS1,INPP5D,RCOR1,SLC1A5,DNASE2,FOSL2,LIPA,MAFB,ALAS1,JAK2,BTK,SPI1,KLF2,SLC46A2,CORO1A,MAEA,CRISPLD1,PRDX1,G6PD,SH2B2,BAK1,JAK3,RB1,INHBA,SLC15A4,RAC2,PRDX2,MAPK14,SLC40A1,FSTL1,HIF1A,RC3H1,TCIRG1,NLRP6,TNFSF14,EPAS1,LYN,FOXO3,CARD9,POLB,HSPA1A,ABCB10,THRA,ARHGEF5,ZFP36,ADAM17,HEATR3,KLF13,STAT5B,TSC22D3,SLC48A1,CCR2,XIAP,B2M,LPCAT3,MYCT1,VEGFA,BAX,HSPA1B,BCL2L11,ADAR,CFL…
GO:BP	positive regulation of protein localization	GO:1903829	FALSE	4.14E-40	39.3829	499	3059	102	78724	GSK3A,TRIM8,TYROBP,RPH3AL,OAZ2,HSPA1L,HCLS1,PRKCD,C2CD2L,RHOG,SESN2,ASPH,CREBBP,JAK2,AKAP5,IL1B,PTPN23,PRKACA,NF2,TLR2,TMEM30A,PINK1,OAZ1,ACSL3,PSEN1,ANG,LAMTOR1,PARP9,DTX3L,CLN3,IRS2,TYK2,RTN4,TRIM28,CDK5R1,RAC2,MAPK14,VPS35,RNF31,HSP90AA1,MSN,NEDD9,BSG,GPR27,PPARG,HIF1A,ITGB2,RAN,CHRM3,SSH1,SORL1,PDPK1,TARDBP,CRKL,ZDHHC5,UBE2J2,ATG13,ARHGEF5,ORAI1,DMAP1,CCT7,SQSTM1,ITGAM,LIMK2,UBE2L3,TSG101,LRP…
GO:BP	regulation of leukocyte cell-cell adhesion	GO:1903037	FALSE	4.76E-40	39.3222	377	3059	89	78724	LAPTM5,ASCL2,LOXL3,FLOT2,BCL6,NLRP3,SASH3,NDFIP1,SMARCD3,YWHAG,VAV1,SYK,PYCARD,JAK2,IL1B,LGALS1,CEBPB,CORO1A,BRD4,FUT7,HLA-E,HLX,IRF1,JAK3,PTPN6,TYK2,FGL2,CD274,TRAF6,CSK,PRDX2,DUSP3,TNFAIP8L2,TNFRSF14,LILRB4,HLA-A,EFNB2,ITGB2,SHB,RC3H1,STAT5A,TNFSF14,CD300A,LYN,VSIR,PDPK1,FOXO3,ALOX5,CD44,ZMIZ1,ELANE,STAT5B,LGALS12,ST3GAL4,ZBTB7B,CCR2,SELE,AP3D1,ARG1,B2M,ADAM8,CD4,IL10,MIA3,FADD,IL4R,BRD2,DNAJA3…
GO:BP	positive regulation of protein modification process	GO:0031401	FALSE	7.71E-40	39.113	637	3059	115	78724	MAP2K2,NCF1,SEMA4D,LAPTM5,GSK3A,CCND3,PTEN,S100A12,MARK2,UBE2S,LILRA5,TICAM1,NRG1,RNF111,RIPK3,ARRB1,MAPK1,HCLS1,NDFIP1,RAC1,DIP2B,PRKCD,BMP2,CSF1R,SYK,RAB3GAP2,OPRD1,TNFSF18,TOLLIP,JAK2,IL1B,PDGFRB,APP,LRRK1,CAMKK2,PTTG1IP,PLAUR,EHD4,LTF,JTB,MAP3K5,PIK3R5,PINK1,STK4,UBB,PARP9,PHF23,SPHK1,TRAF6,BRAT1,FZR1,HSP90AA1,TNFRSF14,NEDD9,GABARAP,MAP2K1,MMP9,MUL1,NPTN,LYN,PDPK1,CRKL,MAP3K11,IP6K2,CD44,CALM…
GO:BP	cell projection morphogenesis	GO:0048858	FALSE	8.28E-40	39.0819	681	3059	119	78724	MAP2K2,SEMA4D,TWF2,B4GALT5,PTEN,MARK2,CTNNB1,DBN1,GLA,MAP4K4,GFRA3,EFNA4,RAC1,MAP1S,DIP2B,SEMA4A,CSF1R,KIAA0319,RHOG,LYPLA2,IST1,RAB10,NUMBL,FBXO45,MEF2A,SIPA1L1,APP,PDLIM5,CYFIP1,KIF13B,SPAST,PSEN1,CUX1,ACTG1,UBB,RTN4,CDK5R1,S100A6,SRGAP2,SLC30A1,EFNB2,B3GNT2,PLXNA2,PACSIN2,MYO9B,CXCR4,VASP,RAB21,MAP2K1,MUL1,EFNA3,PAX6,PITPNA,CD44,DICER1,TIAM2,MFSD2A,PLEKHO1,APLP2,NCAM1,CORO1B,CNP,ADAM17,PLXNB2,…
GO:BP	regulation of response to cytokine stimulus	GO:0060759	FALSE	1.00E-39	39	176	3059	63	78724	AGPAT2,LAPTM5,CASP1,LRRC70,APOA1,SYK,MAPKAPK2,PYCARD,MMP8,CARD16,CARD8,SHARPIN,EIF4E2,TLR2,NR1H3,PADI2,RNF185,PARP9,IRAK3,PTPN6,SPHK1,AGPAT1,CD300LF,NAIP,PPARG,IL1R2,RFFL,USP25,HIF1A,CXCR4,NLRP6,GPS2,MUL1,HIPK1,STAT2,RNF113A,DICER1,HSPA1A,MAPK7,GSTP1,TRIM41,RBM47,ADAM17,PIAS4,ZBP1,ULK1,OAS1,ARG1,XIAP,PAFAH1B1,SPPL2A,F2RL1,HSPA1B,MIB2,ADAR,FADD,GAS6,DNAJA3,MED1,TRIM44,CAV1,SLIT2,AXL
GO:BP	cell junction organization	GO:0034330	FALSE	1.70E-39	38.7693	834	3059	132	78724	LAMTOR2,SEMA4D,PTEN,F11R,ZDHHC12,CTNNB1,DBN1,MAP4K4,RAC1,RAB13,LRFN1,SLC9A1,SEMA4A,CLSTN1,CSF1R,RHOG,SORT1,NUMBL,SNX27,CCM2,IL1B,FBXO45,PTPN23,SIPA1L1,ARL2,PRKACA,APP,TJP2,TRIP6,EGLN1,PDLIM5,NF2,TLR2,ARF1,ARF4,CYFIP1,PSEN1,ACTG1,FSCN1,ACTN1,CLN3,CAP1,RTN4,CDK5R1,DOCK4,CSK,WDR1,SRGAP2,C5AR1,MAPK14,YWHAZ,RHOB,VPS35,DUSP3,SLC30A1,EFNB2,NEDD9,PTPRF,STAU1,SPTB,PICK1,IQSEC1,SSH1,HIPK1,NPTN,CRKL,TGFBR1,…
GO:BP	brain development	GO:0007420	FALSE	1.96E-39	38.7085	754	3059	125	78724	PTEN,TYROBP,AATK,CTNNB1,AKIRIN2,FBXW11,DPCD,MAP1S,BMP2,CSF1R,UQCRQ,NCOA6,ATF5,MAFB,ATXN1L,NUMBL,SLC2A1,GNB4,FBXO45,APP,CLP1,NF2,G6PD,STXBP3,SMAD1,PADI2,PSEN1,UBB,SLC38A2,ATXN1,MBOAT7,IRS2,INHBA,RTN4,CDK5R1,SPHK1,APAF1,SRGAP2,SRD5A1,NAPA,AKNA,NCOR2,PITPNM1,PLXNA2,TRAPPC9,HIF1A,DCLK2,COMT,CXCR4,KDM4B,COX6B1,CBS,RAN,EIF2B5,MAP2K1,KCNE1,SOX1,FOXO3,CRKL,NDST1,SFRP1,NDE1,PAX6,LDHA,ABCB6,EPOR,CALM3,UFC1…
GO:BP	plasma membrane bounded cell projection morphogenesis	GO:0120039	FALSE	2.09E-39	38.6806	676	3059	118	78724	MAP2K2,SEMA4D,TWF2,B4GALT5,PTEN,MARK2,CTNNB1,DBN1,GLA,MAP4K4,GFRA3,EFNA4,RAC1,MAP1S,DIP2B,SEMA4A,CSF1R,KIAA0319,RHOG,LYPLA2,IST1,RAB10,NUMBL,FBXO45,MEF2A,SIPA1L1,APP,PDLIM5,CYFIP1,KIF13B,SPAST,PSEN1,CUX1,ACTG1,UBB,RTN4,CDK5R1,S100A6,SRGAP2,SLC30A1,EFNB2,B3GNT2,PLXNA2,MYO9B,CXCR4,VASP,RAB21,MAP2K1,MUL1,EFNA3,PAX6,PITPNA,CD44,DICER1,TIAM2,MFSD2A,PLEKHO1,APLP2,NCAM1,CORO1B,CNP,ADAM17,PLXNB2,FSTL4,IG…
GO:BP	regulation of autophagy	GO:0010506	FALSE	2.95E-39	38.5308	367	3059	87	78724	GSK3A,TFEB,TRIM8,RRAGD,TICAM1,QSOX1,ATP6V0E1,TOM1,WIPI1,VPS26B,ATP6V0A1,DRAM1,TBC1D14,RAB3GAP2,SESN2,PYCARD,TSPO,MTMR3,CHMP4B,ATP6V1E1,CISD1,PRKACA,CAMKK2,CTSA,PSAP,PINK1,SNX32,CLN3,KDM4A,PHF23,CDK5R1,HSPB1,ATP6V0D1,DDIT3,CALCOCO2,ZDHHC19,UBE2A,VPS35,RNF31,TRIM5,ATP6V0C,EIF2AK1,HIF1A,NLRP6,USP10,UBR4,GAPDH,TBC1D25,RRAGA,FOXO3,DAPK3,ZMPSTE24,WAC,ATF6,TRIM34,ATG13,SNX6,POLDIP2,SQSTM1,MEFV,CAPN1,ATP…
GO:BP	protein-containing complex assembly	GO:0065003	FALSE	3.70E-39	38.4317	3238	3059	296	78724	POMP,CYBA,NDUFB1,TWF2,NLRC4,NACC2,NDUFS2,LRRC61,CAPG,ZDHHC12,UBE2S,CASP1,ARPC2,TICAM1,NRG1,FKBP4,MED16,DIAPH1,CDC42EP4,JMJD6,NLRP3,FLII,PSTPIP2,LCP1,TMEM120A,HCLS1,REPS2,MSRB2,SRPK1,RAC1,SLC1A5,TFIP11,SLC9A1,PRKCD,TRAPPC3,NDUFB4,SHKBP1,APOA1,WAS,GBA2,SYK,CLIP1,OPRD1,GRB2,AP2S1,ECSIT,DNAJB12,DDX23,FERMT3,NDUFA1,PYCARD,PXN,SLC2A1,CREBBP,MOSPD2,JAK2,SRPK2,SNAP29,SVIL,BTK,CHMP4B,CTNNBIP1,CHMP2A,SYP,B…
GO:BP	organophosphate biosynthetic process	GO:0090407	FALSE	7.69E-39	38.1143	619	3059	112	78724	AGPAT2,NDUFB1,NDUFS2,PTEN,AGPAT3,SAMD8,PDXK,INPP5D,PDK3,ITPKC,NDUFB4,APOA1,AKR1A1,TKT,LIPA,CDIPT,PTDSS2,NDUFA1,MTMR3,UPP1,SLC27A2,GMPR2,DGKG,PLSCR1,G6PD,NMNAT1,ACSBG1,PINK1,ACSL3,NDUFV2,FIG4,NDUFC1,ACSS2,MBOAT7,GPAA1,CLN3,PIGO,NDUFC2,IMPDH1,TPI1,AGPAT1,HEXB,ABHD3,IP6K1,PITPNM1,ALDOA,PIGS,BMX,ATP6V0C,PPCDC,SYNJ1,CMPK2,PDK4,CDS2,ELOVL3,NADSYN1,LPCAT2,INPP5K,SLC44A1,CDA,SERAC1,NDUFA11,PLA2G4A,MBOAT2…
GO:BP	mononuclear cell proliferation	GO:0032943	FALSE	8.33E-39	38.0795	319	3059	81	78724	CCND3,ELF4,TYROBP,TNFRSF1B,TICAM1,CTNNB1,RIPK3,BCL6,SASH3,INPP5D,NDFIP1,FOSL2,PRKCD,SYK,LIPA,CD151,TNFSF18,PYCARD,JAK2,BTK,IL1B,CEBPB,CORO1A,HLA-E,IRF1,VAV3,IRS2,CLC,PTPN6,TYK2,IFNK,CD274,TRAF6,MYD88,RAC2,PRDX2,TNFRSF14,MSN,LILRB4,HLA-A,SHB,RC3H1,TNFSF14,CD300A,LYN,VSIR,TIRAP,BID,PIK3CG,STAT5B,CNN2,LGALS12,ZBTB7B,CCR2,EPHB2,SLC11A1,FCGR3A,ARG1,PSMB10,BAX,IL10,FADD,MPL,ALKBH5,DNAJA3,CTLA4,HELLS,GP…
GO:BP	negative regulation of defense response	GO:0031348	FALSE	8.55E-39	38.0678	254	3059	73	78724	ELF4,TNFRSF1B,EXTL3,NDFIP1,GRN,GPR17,PRKCD,PGLYRP1,APOA1,CEACAM1,SYK,FGR,SHARPIN,AOAH,TRAFD1,NT5C2,EIF4E2,HLA-F,HLA-E,NR1H3,CEP63,RB1,IRAK3,PTPN6,FGL2,MAPK14,CST7,YWHAZ,VPS35,TNFAIP8L2,HLA-A,NLRX1,PPARG,NLRP6,GPS2,PPM1B,MUL1,LYN,STAT2,NLRP12,TMSB4X,ALOX5,HCK,TEK,PSMB4,MAPK7,GSTP1,ELANE,GFER,ZFP36,MEFV,PCBP2,BANF1,PROC,SERPING1,IFI16,OAS1,ARG1,LPCAT3,MKRN2,IL10,DHX58,ADAR,DNAJA3,NLRP4,SMAD3,GATA3,…
GO:BP	positive regulation of catabolic process	GO:0009896	FALSE	8.70E-39	38.0603	546	3059	105	78724	LAPTM5,GSK3A,CEBPA,PTEN,TFEB,TRIM8,UPF1,TNFRSF1B,TICAM1,TOM1,OAZ2,RAB7A,WIPI1,GTPBP1,RAD23A,NDFIP1,PRKCD,RAB3GAP2,HERPUD1,SESN2,IL1B,APP,CCDC22,CAMKK2,TNFSF12,FBXL5,QKI,PINK1,OAZ1,TRAF7,PSEN1,RNF185,DTX3L,IRS2,PNPLA2,CALCOCO2,ZDHHC19,FZR1,UBE2A,VPS35,RNF31,HSP90AA1,MSN,GABARAP,TRIM5,CNOT8,EIF2AK1,HIF1A,NANOS3,RC3H1,PSMC3,UBR4,ZC3HAV1,SORL1,VSIR,TARDBP,FOXO3,WAC,ATF6,TRIM34,HSPA1A,PSMC5,FXR2,ATG13…
GO:BP	lymphocyte proliferation	GO:0046651	FALSE	9.37E-39	38.0284	311	3059	80	78724	CCND3,ELF4,TYROBP,TNFRSF1B,TICAM1,CTNNB1,RIPK3,BCL6,SASH3,INPP5D,NDFIP1,FOSL2,PRKCD,SYK,LIPA,CD151,TNFSF18,PYCARD,JAK2,BTK,IL1B,CEBPB,CORO1A,HLA-E,IRF1,VAV3,IRS2,CLC,PTPN6,TYK2,IFNK,CD274,TRAF6,MYD88,RAC2,PRDX2,TNFRSF14,MSN,LILRB4,HLA-A,SHB,RC3H1,TNFSF14,CD300A,LYN,VSIR,TIRAP,BID,PIK3CG,STAT5B,LGALS12,ZBTB7B,CCR2,EPHB2,SLC11A1,FCGR3A,ARG1,PSMB10,BAX,IL10,FADD,MPL,ALKBH5,DNAJA3,CTLA4,HELLS,GPR183,…
GO:BP	regulation of protein-containing complex assembly	GO:0043254	FALSE	1.73E-38	37.7627	421	3059	92	78724	TWF2,CAPG,ZDHHC12,ARPC2,TICAM1,NRG1,FKBP4,CDC42EP4,JMJD6,FLII,LCP1,HCLS1,RAC1,TFIP11,PRKCD,GBA2,SYK,CLIP1,OPRD1,GRB2,PYCARD,SVIL,BTK,CTNNBIP1,SYP,ARL2,HAUS4,CARD8,CORO1A,PREX1,VPS39,CYFIP1,UBLCP1,PINK1,BAK1,EIF2AK2,FSCN1,RB1,BRK1,CDK5R1,MYADM,VPS16,MYD88,NAPA,VPS35,HSP90AA1,MSN,MEGF9,VASP,FES,SPTB,SSH1,SORL1,MAPRE1,TIRAP,GSN,HCK,ZDHHC5,HSPA1A,THRA,ARHGEF5,TLR6,BID,CAPZB,HSF1,MEFV,MTLN,FNIP2,ULK1,…
GO:BP	positive regulation of lymphocyte activation	GO:0051251	FALSE	1.96E-38	37.7073	331	3059	82	78724	TYROBP,FLOT2,TICAM1,AKIRIN2,BCL6,NLRP3,SASH3,INPP5D,SMARCD3,YWHAG,VAV1,SYK,PYCARD,JAK2,BTK,IL1B,SPI1,LGALS1,CORO1A,BRD4,HLA-E,TNFSF12,HLX,VAV3,IRS2,PTPN6,TYK2,CD274,TRAF6,MYD88,CSK,TNFRSF14,LILRB4,HLA-A,EFNB2,SHB,TNFSF14,LYN,VSIR,PDPK1,FOXO3,TIRAP,ZMIZ1,STAT5B,ZBTB7B,CCR2,EPHB2,AP3D1,FCGR3A,B2M,SH3KBP1,ADAM8,CD4,IL10,FADD,GAS6,IL4R,BRD2,BLOC1S3,MPL,DNAJA3,GPR183,HLA-DOA,IL23A,CD80,GATA3,CAV1,DPP4…
GO:BP	cell division	GO:0051301	FALSE	2.10E-38	37.6778	658	3059	115	78724	ARL8A,KLHDC8B,CCND3,DYNLT1,ANAPC11,NEK4,UBE2S,EXOC3,CETN2,REEP4,IST1,RAB10,NUMBL,MTMR3,SVIL,GNAI2,IL1B,CHMP4B,CHMP2A,CLTA,HAUS4,PHF13,CHMP1A,MAEA,ARF1,VPS4B,NUSAP1,ESRRB,JTB,KIF13A,SPAST,CEP63,TXNL4A,RB1,DCTN3,ARL8B,RGS14,KLHL18,INSC,TADA3,FZR1,ACTR2,RHOB,AKNA,ANXA11,NEDD1,NEDD9,RAN,MAP4,RAB35,MCMBP,MAPRE1,EXOC6,RAE1,EVI2B,NDE1,PAX6,ANAPC13,CALM3,RBBP8,CTDP1,BUB3,CHMP1B,POLDIP2,TUBA1B,IGF1R,TOP1,…
GO:BP	endosomal transport	GO:0016197	FALSE	2.67E-38	37.573	290	3059	77	78724	MAP2K2,VPS37B,LMTK2,DENND1A,TBC1D10B,TOM1,RAB7A,STX10,VPS26B,MAPK1,REPS2,RAB13,SLC66A2,ARHGAP1,WAS,TBC1D14,ITSN1,VPS37C,RAB10,SORT1,SNX27,AKAP5,ATP6AP1,CHMP4B,ACAP2,CHMP2A,PTPN23,CORO1A,CHMP1A,CCDC22,NF2,TBC1D10C,VPS4B,EHD4,VPS39,LAMTOR1,SNX32,ARL8B,DENND5A,VPS16,STAM2,EHD1,VPS35,MSN,VTA1,RAB21,MAP2K1,RAB35,DENND2A,SORL1,CHMP1B,PXK,SNX6,RAB5A,SCARB2,HOOK3,SNX12,SQSTM1,BLOC1S1,TSG101,CHMP2B,AP3D1,…
GO:BP	purine-containing compound metabolic process	GO:0072521	FALSE	2.73E-38	37.5643	563	3059	106	78724	NDUFB1,HK2,HK3,NDUFS2,TP53I3,PGD,GTPBP1,GPD2,PDK3,FAR2,RPIA,NDUFB4,TKT,LIPA,NDUFA1,TSPO,HMGCR,PGM1,ARL2,PRKACA,SLC27A2,APP,GMPR2,SLC25A22,TJP2,NT5C2,HSD17B4,G6PD,ACOT8,NMNAT1,ACSBG1,PINK1,TALDO1,ACSL3,PSEN1,NDUFV2,NDUFC1,ACSS2,ABCC6,RBKS,PGLS,NDUFC2,EIF6,IMPDH1,TPI1,PIPOX,DGAT1,MPP1,TPST1,SUCLG1,ALDOA,ATP6V0C,PPCDC,TPST2,DPYD,HIF1A,ACSF2,PDK4,FBP1,ELOVL3,RAN,NADSYN1,GALK1,GAPDH,PGAM1,NDUFA11,SLC2…
GO:BP	regulation of small GTPase mediated signal transduction	GO:0051056	FALSE	2.94E-38	37.5322	307	3059	79	78724	SEMA4D,DENND1A,F11R,ARAP1,SIPA1,BCL6,ARRB1,ARHGAP26,MAP4K4,RAC1,GPR17,RALGAPA2,APOA1,ARHGAP1,VAV1,ITSN1,RASGEF1A,FGD3,SIPA1L1,PREX1,MFN2,SH2B2,GPR35,CYTH2,GMIP,VAV3,RTN4,ARHGAP27,EPS8L1,SRGAP2,RAP1GAP2,GABARAP,MYO9B,FBP1,FGD4,IQSEC1,AKAP13,KBTBD7,CRKL,DENND3,CBL,TEK,TIAM2,CCDC125,STARD8,ARHGEF5,ARHGAP19,SIPA1L2,PIK3CG,SQSTM1,ARHGDIB,ARHGAP10,NOTCH2,EPHB2,PLEKHG6,ABR,GNA13,F2RL1,GIT2,PICALM,ARHGEF…
GO:BP	regulation of cytokine-mediated signaling pathway	GO:0001959	FALSE	3.30E-38	37.4812	165	3059	60	78724	AGPAT2,LAPTM5,CASP1,APOA1,SYK,MAPKAPK2,PYCARD,MMP8,CARD16,CARD8,SHARPIN,EIF4E2,NR1H3,PADI2,RNF185,PARP9,IRAK3,PTPN6,SPHK1,AGPAT1,CD300LF,NAIP,PPARG,IL1R2,RFFL,USP25,HIF1A,CXCR4,NLRP6,GPS2,MUL1,HIPK1,STAT2,RNF113A,DICER1,HSPA1A,GSTP1,TRIM41,RBM47,ADAM17,PIAS4,ZBP1,ULK1,OAS1,ARG1,XIAP,PAFAH1B1,SPPL2A,F2RL1,HSPA1B,MIB2,ADAR,FADD,GAS6,DNAJA3,MED1,TRIM44,CAV1,SLIT2,AXL
GO:BP	protein maturation	GO:0051604	FALSE	9.46E-38	37.024	539	3059	103	78724	NLRC4,ASPRV1,CASP1,PSENEN,MVP,FKBP4,QSOX1,TESC,HSPA1L,RP2,DNAJC5,GRN,CTSS,F12,TOR1A,MAFB,DNAJB12,PCSK5,CREBBP,ARL2,PRKACA,TTC1,FKBP5,NAA60,RUVBL2,PLAUR,TMEM208,PSEN1,APH1B,UGGT1,DHH,MEP1A,GPAA1,CLN3,PIGO,C1RL,HSPB1,FKBP9,HSP90AA1,P4HB,IL1R2,PIGS,CASP9,CLEC3B,DNAJB6,SIL1,SORL1,ECE2,HM13,VSIR,HSPA6,ATG4B,GSN,ZMPSTE24,ATF6,GGT1,HSPA1A,ANXA2,FKBP1A,TSPAN33,SNX12,CCT7,ADAM17,PPIB,CPM,TOR1B,CTSH,GRPEL1…
GO:BP	response to nutrient levels	GO:0031667	FALSE	1.30E-37	36.8856	510	3059	100	78724	TFEB,RRAGD,ZFYVE1,RXRA,WIPI1,MAPK1,CD68,VDR,PLIN3,YWHAG,LIPA,SESN2,TSPO,SLC2A1,CREBBP,MTMR3,UPP1,GNAI2,SETDB1,G6PD,RMI1,ARSB,MAP3K5,FOLR1,SLC38A2,EIF2AK2,LAMTOR1,CPEB4,KDM4A,INHBA,TRIM25,APAF1,DDIT3,SRD5A1,MAPK14,YWHAZ,GABARAP,PPARG,MBD1,PPM1D,EIF2AK1,PDK4,COMT,FOLR2,F5,FBP1,SP1,BNIP2,CBS,RNF167,FES,PICK1,RRAGA,SORL1,MPO,FOXO3,SFRP1,CBL,MFSD2A,TBL2,ATG7,DSC2,ARSA,ZFP36,HSF1,IGF1R,POSTN,IFI16,WIPI…
GO:BP	negative regulation of transport	GO:0051051	FALSE	1.35E-37	36.8685	412	3059	90	78724	RIN3,GSK3A,PTEN,DYSF,TNFRSF1B,OS9,NRG1,WWP2,OAZ2,RAB7A,NDFIP1,MAP4K4,RAC1,ARHGAP1,CEACAM1,GRB10,ANKRD13D,MCTP1,ATG3,TSPO,HMGCR,GNAI2,IL1B,SPI1,SLC43A2,CORO1A,TLR2,VPS4B,HLA-F,PLSCR1,NR1H3,CYFIP1,STXBP3,OAZ1,GPR35,LRPAP1,IRS2,INHBA,CSK,RANGAP1,CD300LF,VPS35,SLC30A1,SUFU,PACSIN2,VAMP8,KCNE1,CD300A,INPP5K,MMP9,RRAD,GSTO1,KCNE3,SFRP1,RSAD2,CALM3,PNKD,OXSR1,FAM3D,ANXA2,PXK,SEMG1,SNX12,NOS1,CNN2,MIDN,C…
GO:BP	cellular response to molecule of bacterial origin	GO:0071219	FALSE	1.44E-37	36.8413	225	3059	68	78724	CASP1,UPF1,TNFRSF1B,TICAM1,NLRP3,MAPK1,CD68,CAMP,HDAC5,PYCARD,TSPO,JAK2,HADHB,TLR5,IL1B,MMP8,CARD16,CARD8,TLR2,LY86,LTF,NR1H3,TLR1,DEFA4,NFKBIB,BPI,IRAK3,PAF1,CTR9,CD274,TRAF6,MYD88,PRDX2,MAPK14,CXCL1,TRIM5,CMPK2,LY96,CEBPE,MMP9,VIM,LYN,TIRAP,HCK,GSTP1,TRIM41,TLR6,GFER,ZFP36,HSF1,SCIMP,PABPN1,MAP2K3,EPHB2,CD14,IL37,TRIB1,IL10,GBP2,CASP7,SLC7A5,NLRP7,CD80,DEFA6,CD40,KMO,SHPK,AXL
GO:BP	anterograde trans-synaptic signaling	GO:0098916	FALSE	1.84E-37	36.7356	775	3059	124	78724	CACNA1E,GSK3A,SYNGR1,PTEN,ZDHHC12,TYROBP,DYSF,RETN,CTNNB1,RPH3AL,ADORA3,TSHZ3,MAPK1,DNAJC5,HRH2,DBN1,BTBD9,CLSTN1,TOR1A,YWHAG,STXBP2,MCTP1,JAK2,SNAP29,HMGCR,AKAP5,GNAI2,IL1B,FBXO45,SYP,SIPA1L1,PRKACA,APP,ARF1,SLC4A8,CYFIP1,STXBP3,SYN2,PINK1,MCTP2,PSEN1,SLC38A2,CLN3,P2RX1,RGS14,ZDHHC3,RTN4,CACNG8,NAPA,VPS35,SLC30A1,GABARAP,SLC1A7,PACSIN2,SLC12A6,SYNJ1,STAU1,COMT,RNF167,CHRM3,PICK1,FBXL20,SSH1,NPTN…
GO:BP	chemical synaptic transmission	GO:0007268	FALSE	1.84E-37	36.7356	775	3059	124	78724	CACNA1E,GSK3A,SYNGR1,PTEN,ZDHHC12,TYROBP,DYSF,RETN,CTNNB1,RPH3AL,ADORA3,TSHZ3,MAPK1,DNAJC5,HRH2,DBN1,BTBD9,CLSTN1,TOR1A,YWHAG,STXBP2,MCTP1,JAK2,SNAP29,HMGCR,AKAP5,GNAI2,IL1B,FBXO45,SYP,SIPA1L1,PRKACA,APP,ARF1,SLC4A8,CYFIP1,STXBP3,SYN2,PINK1,MCTP2,PSEN1,SLC38A2,CLN3,P2RX1,RGS14,ZDHHC3,RTN4,CACNG8,NAPA,VPS35,SLC30A1,GABARAP,SLC1A7,PACSIN2,SLC12A6,SYNJ1,STAU1,COMT,RNF167,CHRM3,PICK1,FBXL20,SSH1,NPTN…
GO:BP	intracellular receptor signaling pathway	GO:0030522	FALSE	2.18E-37	36.6606	377	3059	86	78724	ZDHHC12,TICAM1,RXRA,FKBP4,NLRP3,MAPK1,PDK3,SMPDL3A,MAP2K6,VDR,SLC15A3,BMP2,TLR7,TLR8,PYCARD,JAK2,BTK,NR6A1,KLF2,SLC46A2,CARD8,ALOXE3,ZCCHC3,ESRRB,NR1H3,PADI2,SAFB,EIF2AK2,SLC19A1,ZDHHC3,RTN4,TRAF6,SLC15A4,TRIM25,MYD88,RNF135,TADA3,BRCA1,NCOR2,NLRX1,PPARG,NCOA2,NLRP6,GPS2,CTBP2,PIK3AP1,ZC3HAV1,CRKL,UNC93B1,TIRAP,SFRP1,ESRRA,RSAD2,ZDHHC5,HSPA1A,THRA,NAGK,TLR6,ZMIZ1,MEFV,PCBP2,BANF1,SCIMP,GPATCH3,OA…
GO:BP	trans-synaptic signaling	GO:0099537	FALSE	4.14E-37	36.3825	781	3059	124	78724	CACNA1E,GSK3A,SYNGR1,PTEN,ZDHHC12,TYROBP,DYSF,RETN,CTNNB1,RPH3AL,ADORA3,TSHZ3,MAPK1,DNAJC5,HRH2,DBN1,BTBD9,CLSTN1,TOR1A,YWHAG,STXBP2,MCTP1,JAK2,SNAP29,HMGCR,AKAP5,GNAI2,IL1B,FBXO45,SYP,SIPA1L1,PRKACA,APP,ARF1,SLC4A8,CYFIP1,STXBP3,SYN2,PINK1,MCTP2,PSEN1,SLC38A2,CLN3,P2RX1,RGS14,ZDHHC3,RTN4,CACNG8,NAPA,VPS35,SLC30A1,GABARAP,SLC1A7,PACSIN2,SLC12A6,SYNJ1,STAU1,COMT,RNF167,CHRM3,PICK1,FBXL20,SSH1,NPTN…
GO:BP	muscle structure development	GO:0061061	FALSE	7.40E-37	36.131	693	3059	116	78724	GSK3A,FLOT2,CTNNB1,NRG1,AKIRIN2,FLII,CD53,KLF5,SLC9A1,ATP11A,SMARCD3,BMP2,HDAC5,ANKRD2,HMG20B,SORT1,SVIL,MEF2A,LGALS1,PDGFRB,SAP30,PDLIM2,EGLN1,PDLIM5,G6PD,SLC8A1,PDLIM7,MAP3K5,HLX,SMAD1,SMTN,QKI,ACTG1,CXCL14,ACTN1,RB1,HIRA,DDIT3,WDR1,MAPK14,EHD1,EFNB2,FZD2,FOXN2,TNFSF14,EPAS1,AKAP13,EFEMP2,MYL3,TGFBR1,ZMPSTE24,HDAC4,CTDP1,PLEKHO1,FKBP1A,JAG1,NOS1,USP19,NOTCH2,MTLN,MYL11,TCAP,DNMT1,MDM2,STAC3,VEG…
GO:BP	neuron projection morphogenesis	GO:0048812	FALSE	8.19E-37	36.0867	660	3059	113	78724	MAP2K2,SEMA4D,TWF2,B4GALT5,PTEN,MARK2,CTNNB1,DBN1,GLA,MAP4K4,GFRA3,EFNA4,RAC1,MAP1S,DIP2B,SEMA4A,CSF1R,KIAA0319,RHOG,LYPLA2,IST1,RAB10,NUMBL,FBXO45,MEF2A,SIPA1L1,APP,PDLIM5,CYFIP1,KIF13B,SPAST,PSEN1,CUX1,ACTG1,UBB,RTN4,CDK5R1,S100A6,SRGAP2,SLC30A1,EFNB2,B3GNT2,PLXNA2,CXCR4,VASP,RAB21,MAP2K1,MUL1,EFNA3,PAX6,PITPNA,DICER1,TIAM2,MFSD2A,APLP2,NCAM1,CNP,ADAM17,PLXNB2,FSTL4,IGF1R,FGF13,NOTCH2,POSTN,EPH…
GO:BP	cellular response to hormone stimulus	GO:0032870	FALSE	8.41E-37	36.0752	638	3059	111	78724	CTSD,AGTRAP,CTSB,GSK3A,GAB1,RXRA,FKBP4,BLVRB,MAPK1,RAB13,CTSS,SLC9A1,VDR,PRKCD,CEACAM1,YWHAG,PTPRE,GRB10,HDAC5,GRB2,RAB10,PXN,JAK2,GNAI2,IL1B,PRKACA,KLF2,ZNF592,FUT7,SHC1,ESRRB,NR1H3,CYFIP1,GNB1,PADI2,SH2B2,SAFB,JAK3,RB1,WDTC1,IRS2,TYK2,INHBA,CSK,SRD5A1,TADA3,ECHDC3,BRCA1,RANGAP1,RPS6KB2,NCOR2,PPARG,TFPI,NCOA2,PDK4,ABHD2,FBP1,SP1,CASP9,STAT5A,RAN,CTBP2,INPP5K,SORL1,LYN,ADIPOR2,PDPK1,FOXO3,CRKL,SF…
GO:BP	regulation of kinase activity	GO:0043549	FALSE	9.22E-37	36.0352	431	3059	91	78724	MAP2K2,NCF1,CCND3,PTEN,S100A12,MARK2,LILRA5,NRG1,MVP,SERTAD1,RIPK3,CDKN2C,PRKCD,BMP2,CSF1R,CEACAM1,YWHAG,PYCARD,FGR,JAK2,IL1B,PDGFRB,CAMKK2,SLC8A1,LTF,JTB,MAP3K5,PIK3R5,PINK1,PSEN1,RB1,IRS2,IRAK3,RGS14,CDK5R1,TRAF6,HSPB1,C5AR1,DUSP3,LILRB4,NEDD9,MAP2K1,CD300A,INPP5K,LYN,PDPK1,DUSP1,MAP3K11,CD44,CALM3,GSTP1,ARHGEF5,TLR6,SNX6,ELANE,PIK3CG,MAP3K10,ADAM17,TSG101,MIDN,CCNK,FBXW7,MAP2K3,EPHB2,SLC11A1,Z…
GO:BP	myeloid leukocyte differentiation	GO:0002573	FALSE	1.42E-36	35.8475	240	3059	69	78724	CEBPA,TYROBP,CTNNB1,TESC,HCLS1,INPP5D,NDFIP1,CD101,FOSL2,BMP2,CSF1R,CEACAM1,MAFB,UBASH3B,OSCAR,ATP6AP1,CTNNBIP1,SPI1,BATF,CEBPB,APP,LRRK1,TLR2,LTF,QKI,LBR,PSEN1,RB1,INHBA,TRAF6,MYD88,MAPK14,LILRB4,NEDD9,PPARG,EIF2AK1,LTBR,TCIRG1,CEBPE,STAT5A,FES,GAB2,MMP9,LYN,EVI2B,SFRP1,ANXA2,HSF1,NOTCH2,FBXW7,TFE3,IFI16,LILRB3,PAFAH1B1,TRIB1,VEGFA,CLPB,F2RL1,CD4,GPR137,FADD,IL34,FAM20C,IRF4,MED1,GPR183,IL23A,GA…
GO:BP	microtubule-based process	GO:0007017	FALSE	1.56E-36	35.8062	999	3059	141	78724	ARL8A,GSK3A,NSFL1C,LRRC61,PTEN,DYNLT1,MARK2,FLOT2,CTNNB1,FKBP4,DIAPH1,FBXW11,DPCD,RAC1,MAP1S,SLIRP,CETN2,LAMP1,GBA2,CLIP1,ATF5,CHMP4B,CHMP2A,CCDC13,ARL2,HAUS4,APP,CHMP1A,UBXN2B,VPS4B,NUSAP1,KIF3C,QRICH2,KIF13A,KIF13B,DCTN2,SPAST,UBB,CEP63,CLN3,DCTN3,ARL8B,RGS14,CDK5R1,SLC22A16,HSPB1,SRGAP2,INSC,BRCA1,ACTR2,NEDD1,GABARAP,PPP1R12A,NUBP1,PKD1,HIF1A,STAU1,DCLK2,ROPN1L,RAN,RAB21,FES,MAP4,GAPDH,MAPRE1,…
GO:BP	circulatory system process	GO:0003013	FALSE	2.82E-36	35.5496	602	3059	107	78724	AGTRAP,GSK3A,EMILIN2,CYB5R3,ADORA3,HRH2,SLC1A5,SLC9A1,MAP2K6,CEACAM1,ASPH,FLI1,PCSK5,SLC2A1,TBXAS1,C3AR1,MEF2A,CTNNBIP1,PRKACA,KLF2,SLC24A3,TJP2,SLC4A8,SLC8A1,SCPEP1,TNNI2,SLC38A2,SLC19A1,P2RX1,SLC2A3,DOCK4,KCNJ2,HSP90AA1,SUCNR1,PPARG,PLOD3,COMT,F5,CXCR4,CELF2,CBS,KCNE1,EPAS1,SLC44A1,GSTO1,KCNE3,MYL3,GSN,ADM5,ZMPSTE24,CALM3,TEK,HDAC4,APLN,MFSD2A,THRA,DSC2,PIK3CG,SLC6A13,NOS1,ACVRL1,FGF13,LRP1,E2F…
GO:BP	canonical NF-kappaB signal transduction	GO:0007249	FALSE	2.84E-36	35.5474	308	3059	77	78724	SHISA5,S100A12,TRIM8,CASP1,FLOT2,TICAM1,FBXW11,NDFIP1,SECTM1,TLR7,TLR8,RBCK1,PYCARD,CREBBP,IL1B,MAP3K3,LGALS1,CARD16,CARD8,SHARPIN,BRD4,CCDC22,TLR2,PRDX1,LTF,PINK1,NFKBIB,TRAF6,HSPB1,TRIM25,MYD88,RNF31,LILRB4,NLRX1,TRIM5,LTBR,NLRP6,USP10,PPM1B,AKAP13,GAPDH,MUL1,ZC3HAV1,PDPK1,NLRP12,TMSB4X,TIRAP,TRIM34,CARD9,GSTP1,BST2,TERF2IP,TLR6,FKBP1A,SQSTM1,TNFSF10,XIAP,VEGFA,ADAM8,F2RL1,CD4,SLC44A2,TNFRSF10B…
GO:BP	defense response to virus	GO:0051607	FALSE	5.03E-36	35.298	319	3059	78	78724	RNASE2,RNASEL,TRIM8,CASP1,IFITM1,TICAM1,RIPK3,NLRP3,UNC13D,ISG20,TLR7,TLR8,IL10RB,PYCARD,IL1B,IFITM2,CARD8,NT5C2,TLR2,ZCCHC3,PLSCR1,EXOSC4,RNF185,EIF2AK2,IRF1,PARP9,MLKL,DTX3L,TRIM28,IFNK,FGL2,GBP1,TRAF6,TBKBP1,TRIM25,MYD88,RNF135,IFNGR2,HSP90AA1,POLR3D,TRIM5,NLRP6,VAMP8,PPM1B,MUL1,ZC3HAV1,STAT2,UNC93B1,ZMPSTE24,RSAD2,MORC3,TRIM34,CARD9,BST2,TRIM41,ATG7,PCBP2,ZBP1,IFIT2,IFI16,OAS1,PML,CLPB,F2RL1,…
GO:BP	regulation of protein kinase activity	GO:0045859	FALSE	6.11E-36	35.2137	402	3059	87	78724	MAP2K2,NCF1,CCND3,PTEN,S100A12,MARK2,LILRA5,NRG1,MVP,SERTAD1,RIPK3,CDKN2C,PRKCD,BMP2,CSF1R,CEACAM1,YWHAG,PYCARD,FGR,JAK2,IL1B,PDGFRB,CAMKK2,SLC8A1,LTF,JTB,MAP3K5,PIK3R5,PINK1,PSEN1,RB1,IRAK3,RGS14,CDK5R1,TRAF6,HSPB1,C5AR1,DUSP3,LILRB4,NEDD9,MAP2K1,CD300A,INPP5K,LYN,PDPK1,DUSP1,MAP3K11,CALM3,GSTP1,ARHGEF5,TLR6,SNX6,ELANE,PIK3CG,MAP3K10,ADAM17,TSG101,CCNK,FBXW7,MAP2K3,EPHB2,SLC11A1,CALM2,TRIB1,CD4,…
GO:BP	cellular response to lipopolysaccharide	GO:0071222	FALSE	7.76E-36	35.11	215	3059	65	78724	CASP1,UPF1,TNFRSF1B,TICAM1,NLRP3,MAPK1,CD68,CAMP,HDAC5,PYCARD,TSPO,JAK2,HADHB,TLR5,IL1B,MMP8,CARD16,CARD8,TLR2,LY86,LTF,NR1H3,DEFA4,NFKBIB,BPI,IRAK3,PAF1,CTR9,CD274,TRAF6,MYD88,PRDX2,MAPK14,CXCL1,TRIM5,CMPK2,LY96,CEBPE,MMP9,VIM,LYN,HCK,GSTP1,TRIM41,GFER,ZFP36,HSF1,SCIMP,PABPN1,MAP2K3,EPHB2,CD14,IL37,TRIB1,IL10,GBP2,CASP7,SLC7A5,NLRP7,CD80,DEFA6,CD40,KMO,SHPK,AXL
GO:BP	defense response to bacterium	GO:0042742	FALSE	1.36E-35	34.8664	332	3059	79	78724	CYBA,NLRC4,EMILIN2,S100A12,TFEB,CASP1,AKIRIN2,NLRP3,GRN,CAMP,PRKCD,PGLYRP1,S100A8,SYK,HP,FCER1G,GBP6,RBCK1,CFP,PYCARD,FGR,RNASE3,IL1B,LCN2,CLEC4E,CEBPB,S100A9,SHARPIN,TLR2,SHC1,HLA-E,LTF,SLPI,DEFA4,ANG,BPI,GBP1,MYD88,C5AR1,RNF31,SLC30A1,TNFRSF14,HLA-A,NAIP,PI3,PLAC8,NLRP6,MPO,TIRAP,CARD9,WFDC3,NAGK,TLR6,ELANE,SEMG1,ADAM17,ROMO1,RNASE4,ANXA3,NOTCH2,SLC11A1,OAS1,XIAP,F2RL1,CD4,SLC9A9,IL10,GBP2,CASP…
GO:BP	regulation of adaptive immune response	GO:0002819	FALSE	1.47E-35	34.8331	217	3059	65	78724	ASCL2,LOXL3,TNFRSF1B,RIPK3,AKIRIN2,BCL6,NLRP3,SASH3,NDFIP1,SECTM1,WAS,CR1L,CEACAM1,YWHAG,PYCARD,JAK2,BTK,IL1B,LGALS1,BATF,PVR,BRD4,FUT7,HLA-F,HLA-E,TNFSF12,HLX,IRF1,JAK3,CLC,PTPN6,TYK2,CD274,TRAF6,SLC15A4,TNFRSF14,LILRB4,HLA-A,RC3H1,STAT5A,PLA2G4A,RSAD2,CARD9,C17ORF99,ZBTB7B,CCR2,EPHB2,SLC11A1,ARG1,B2M,CD4,IL10,FADD,IL4R,BRD2,IL23A,CD80,LTA,GATA3,IL7R,CD40,CD28,NLRP10,SLAMF1,OPA1
GO:BP	cellular component disassembly	GO:0022411	FALSE	1.70E-35	34.7702	446	3059	91	78724	TWF2,CAPG,UPF1,TOM1,FLII,LCP1,MAP4K4,MAP1S,TFIP11,DNASE2,CTSS,PLIN3,SMARCD3,IST1,ASPH,SNAP29,SVIL,CHMP4B,MMP8,CHMP2A,SHARPIN,CHMP1A,EIF4E2,VPS4B,NMNAT1,SPAST,FSCN1,CLN3,IRAK3,PNPLA2,KDM4A,PHF23,VPS16,RAC2,APAF1,CALCOCO2,WDR1,NAPA,DUSP3,NEDD9,VTA1,GABARAP,SYNJ1,USP10,VAMP8,MAP4,SPTB,IQSEC1,TBC1D25,MMP9,TGFBR1,GSN,NFE2,ZMPSTE24,DICER1,C1QA,DEDD2,CHMP1B,ZNF598,ELANE,CAPZB,ITGAM,MTRF1L,HSF1,IGF1R,HBS…
GO:BP	positive regulation of phosphate metabolic process	GO:0045937	FALSE	1.90E-35	34.7215	560	3059	102	78724	MAP2K2,NCF1,SEMA4D,GSK3A,CCND3,S100A12,MARK2,LILRA5,NRG1,RIPK3,ARRB1,MAPK1,HCLS1,RAC1,PRKCD,BMP2,CSF1R,SYK,OPRD1,GRB10,TNFSF18,JAK2,IL1B,PDGFRB,APP,LRRK1,CAMKK2,PLAUR,EHD4,LTF,JTB,MAP3K5,PIK3R5,PINK1,STK4,ACSL3,PSEN1,ANG,PARP9,SPHK1,TRAF6,BRAT1,HSP90AA1,TNFRSF14,NEDD9,HIF1A,MAP2K1,MMP9,NPTN,LYN,PDPK1,TMSB4X,CRKL,MAP3K11,IP6K2,CD44,CALM3,TEK,ARHGEF5,TLR6,ELANE,CD244,PIK3CG,MAP3K10,ADAM17,LIMK2,NOS…
GO:BP	positive regulation of phosphorus metabolic process	GO:0010562	FALSE	1.90E-35	34.7215	560	3059	102	78724	MAP2K2,NCF1,SEMA4D,GSK3A,CCND3,S100A12,MARK2,LILRA5,NRG1,RIPK3,ARRB1,MAPK1,HCLS1,RAC1,PRKCD,BMP2,CSF1R,SYK,OPRD1,GRB10,TNFSF18,JAK2,IL1B,PDGFRB,APP,LRRK1,CAMKK2,PLAUR,EHD4,LTF,JTB,MAP3K5,PIK3R5,PINK1,STK4,ACSL3,PSEN1,ANG,PARP9,SPHK1,TRAF6,BRAT1,HSP90AA1,TNFRSF14,NEDD9,HIF1A,MAP2K1,MMP9,NPTN,LYN,PDPK1,TMSB4X,CRKL,MAP3K11,IP6K2,CD44,CALM3,TEK,ARHGEF5,TLR6,ELANE,CD244,PIK3CG,MAP3K10,ADAM17,LIMK2,NOS…
GO:BP	signal release	GO:0023061	FALSE	3.78E-35	34.4225	501	3059	96	78724	DYSF,RETN,RPH3AL,ADORA3,DNAJC5,MAP4K4,MAP2K6,C2CD2L,SYK,STXBP2,MCTP1,TSPO,PCSK5,JAK2,SNAP29,BTK,IL1B,FBXO45,SYP,PTPN23,PRKACA,SLC25A22,SMPD3,SLC4A8,STXBP3,SYN2,PINK1,MCTP2,PSEN1,SLC38A2,IRS2,P2RX1,INHBA,SIDT2,NAPA,VPS35,SLC30A1,SUCNR1,GPR27,PPARG,SYNJ1,HIF1A,COMT,TCIRG1,VAMP8,CHRM3,PICK1,FBXL20,PLA2G4A,LYN,TARDBP,LIN7A,SFRP1,ALOX5,PNKD,SYN1,FAM3D,ORAI1,RAB5A,ADAM17,KPNA4,LIN7B,MIDN,NADK,PIM3,CDK1…
GO:BP	T cell differentiation	GO:0030217	FALSE	4.11E-35	34.3857	319	3059	77	78724	ASCL2,LOXL3,CTNNB1,RIPK3,BCL6,JMJD6,NLRP3,SASH3,FOSL2,SMARCD3,SEMA4A,VAV1,SYK,LIPA,FCER1G,MAFB,IL1B,SPI1,LGALS1,BATF,CLEC4E,SLC46A2,PREX1,BRD4,FUT7,HLX,IRF1,JAK3,FGL2,PRDX2,LILRB4,SHB,RC3H1,TCIRG1,STAT5A,VSIR,FOXO3,RSAD2,ZMIZ1,ADAM17,PRELID1,STAT5B,ZBTB7B,CCR2,AP3D1,B2M,ADAM8,CD4,FADD,IL4R,BRD2,CLEC4D,CCR9,DNAJA3,CCR6,CTLA4,IRF4,THEMIS,AIRE,GPR183,HLA-DOA,LEPR,IL23A,CD80,WNT1,GATA3,CD3G,IL7R,CD83…
GO:BP	negative regulation of immune response	GO:0050777	FALSE	4.19E-35	34.3778	198	3059	62	78724	ASCL2,LOXL3,BCL6,INPP5D,NDFIP1,GRN,GPR17,PGLYRP1,CR1L,CEACAM1,SYK,FGR,SPI1,LGALS1,TRAFD1,EIF4E2,HLA-F,HLA-E,NR1H3,HLX,CEP63,JAK3,IRAK3,PTPN6,FGL2,CD274,MAPK14,YWHAZ,TNFRSF14,LILRB4,HLA-A,NLRX1,PPARG,RC3H1,NLRP6,STAT5A,CD300A,MUL1,LYN,STAT2,HCK,CD59,PSMB4,GFER,BANF1,ZBTB7B,SERPING1,CCR2,IFI16,OAS1,ARG1,MKRN2,IL10,DHX58,ADAR,IL4R,DNAJA3,NLRP4,CD80,IL7R,A2M,SLAMF1
GO:BP	inorganic ion homeostasis	GO:0098771	FALSE	5.01E-35	34.3003	534	3059	99	78724	CYBA,TRPC6,DIAPH1,NDFIP1,SLC34A3,BTBD9,SLC9A1,VDR,HERPUD1,UBASH3B,ASPH,CCL23,TBXAS1,GHITM,ATP6AP1,PRKACA,SLC31A2,APP,SLC24A3,CORO1A,MT1F,EGLN1,CCDC22,SLC12A9,ARF1,SLC8A1,FBXL5,ATP1B3,BAK1,PSEN1,PDZD8,ABCC6,ACO1,CLN3,PTPN6,P2RX1,ATP6V0D1,DDIT3,CNNM4,SLC40A1,HEXB,KCNJ2,STEAP4,SLC30A1,ATOX1,NUBP1,EIF2AK1,SLC12A6,HIF1A,COMT,TCIRG1,EPAS1,GSTO1,NPTN,LYN,KCNE3,PDPK1,GRINA,ABCB6,CALM3,TTC7A,ELANE,FKBP1A,…
GO:BP	sexual reproduction	GO:0019953	FALSE	5.36E-35	34.2712	1122	3059	148	78724	TRPC6,GSK3A,PTEN,ANAPC11,CTNNB1,DEAF1,BCL6,HSPA1L,SLCO4C1,FBXW11,DPCD,SRPK1,SLIRP,LHFPL2,CETN2,AGFG1,TDRD9,PANX1,NR6A1,PRKACA,TDRD7,PSMD13,IGF2R,MSH6,ZGLP1,SLC2A14,RMI1,SMAD1,FOLR1,QKI,DHH,UBB,ANG,RB1,SBF1,INHBA,TRIM28,SPACDR,PRR19,SLC22A16,SLC9A8,C3ORF62,SLC26A8,HEXB,FZR1,ACTR2,NDRG3,SUFU,ALDOA,DAZAP1,STAU1,NANOS3,FOLR2,SHB,ABHD2,PROK2,ROPN1L,CCNI,RAN,INSL3,PTX3,GALNT3,SMCHD1,SGPL1,DUSP1,FOXO3,C…
GO:BP	regulation of tumor necrosis factor superfamily cytokine production	GO:1903555	FALSE	6.56E-35	34.1829	171	3059	58	78724	CYBA,ELF4,LILRA5,TYROBP,TICAM1,SASH3,FRMD8,SYK,MAPKAPK2,PYCARD,TSPO,ORM2,JAK2,BTK,MMP8,APP,TNFRSF8,TLR2,HLA-E,LTF,TLR1,PSEN1,BPI,IRAK3,PTPN6,CD274,ORM1,HSPB1,MYD88,LILRB4,LY96,VSIR,TIRAP,DICER1,CARD9,GSTP1,CLEC4A,ZFP36,ADAM17,CCR2,EPHB2,IFNGR1,CD14,FCGR3A,OAS1,IL37,ADAM8,IL10,FADD,GAS6,LRRK2,LILRA4,POMC,CD84,IL23A,IGF1,SLAMF1,AXL
GO:BP	tumor necrosis factor superfamily cytokine production	GO:0071706	FALSE	6.56E-35	34.1829	171	3059	58	78724	CYBA,ELF4,LILRA5,TYROBP,TICAM1,SASH3,FRMD8,SYK,MAPKAPK2,PYCARD,TSPO,ORM2,JAK2,BTK,MMP8,APP,TNFRSF8,TLR2,HLA-E,LTF,TLR1,PSEN1,BPI,IRAK3,PTPN6,CD274,ORM1,HSPB1,MYD88,LILRB4,LY96,VSIR,TIRAP,DICER1,CARD9,GSTP1,CLEC4A,ZFP36,ADAM17,CCR2,EPHB2,IFNGR1,CD14,FCGR3A,OAS1,IL37,ADAM8,IL10,FADD,GAS6,LRRK2,LILRA4,POMC,CD84,IL23A,IGF1,SLAMF1,AXL
GO:BP	regulation of canonical NF-kappaB signal transduction	GO:0043122	FALSE	7.77E-35	34.1096	287	3059	73	78724	SHISA5,S100A12,TRIM8,CASP1,FLOT2,TICAM1,FBXW11,NDFIP1,SECTM1,TLR7,TLR8,RBCK1,PYCARD,IL1B,MAP3K3,LGALS1,CARD16,CARD8,SHARPIN,BRD4,CCDC22,LTF,PINK1,NFKBIB,TRAF6,HSPB1,TRIM25,MYD88,RNF31,LILRB4,NLRX1,TRIM5,LTBR,NLRP6,USP10,PPM1B,AKAP13,GAPDH,MUL1,ZC3HAV1,PDPK1,NLRP12,TMSB4X,TIRAP,TRIM34,CARD9,GSTP1,BST2,TERF2IP,TLR6,FKBP1A,SQSTM1,TNFSF10,XIAP,VEGFA,F2RL1,CD4,SLC44A2,TNFRSF10B,MIB2,CFLAR,FADD,IFIT5,C…
GO:BP	embryo development ending in birth or egg hatching	GO:0009792	FALSE	8.42E-35	34.0749	692	3059	113	78724	MAFG,CEBPA,ASCL2,TFEB,CTNNB1,DEAF1,AKIRIN2,MAPK1,DBN1,ATP11A,ITPK1,BMP2,GRB2,EPN1,PCSK5,CCM2,PRKACA,CEBPB,KLF2,SPINT1,TRIP6,EGLN1,MFN2,FOLR1,STK4,PSEN1,MGAT1,STK3,WDTC1,HS6ST1,BRK1,RTN4,TRIM28,CDK5R1,CTR9,TRAF6,APAF1,SLC39A1,BRCA1,SLC30A1,SUFU,PLXNA2,PLOD3,PKD1,TMEM107,HIF1A,VASP,DNAJB6,MAP2K1,EPAS1,INPP5K,HM13,XYLT1,NDST1,TGFBR1,SFRP1,PAX6,POLB,RBBP8,RAI2,CHST11,MIB1,ZMIZ1,NPM2,PTPN18,NSDHL,PLXN…
GO:BP	positive regulation of phosphorylation	GO:0042327	FALSE	8.99E-35	34.0464	506	3059	96	78724	MAP2K2,NCF1,SEMA4D,GSK3A,CCND3,S100A12,MARK2,LILRA5,NRG1,RIPK3,ARRB1,MAPK1,HCLS1,RAC1,PRKCD,BMP2,CSF1R,SYK,OPRD1,GRB10,TNFSF18,JAK2,IL1B,PDGFRB,APP,LRRK1,CAMKK2,PLAUR,EHD4,LTF,JTB,MAP3K5,PIK3R5,PINK1,STK4,ANG,PARP9,SPHK1,TRAF6,BRAT1,HSP90AA1,TNFRSF14,NEDD9,MAP2K1,MMP9,NPTN,LYN,PDPK1,CRKL,MAP3K11,IP6K2,CD44,CALM3,TEK,ARHGEF5,TLR6,ELANE,PIK3CG,MAP3K10,ADAM17,LIMK2,NOS1,FBXW7,MAP2K3,SLC11A1,ZNF622,F…
GO:BP	regulation of leukocyte mediated immunity	GO:0002703	FALSE	1.07E-34	33.9715	255	3059	69	78724	TYROBP,TNFRSF1B,TICAM1,RIPK3,BCL6,NLRP3,SASH3,NDFIP1,UNC13D,SECTM1,WAS,LAMP1,CR1L,CEACAM1,YWHAG,VAV1,SYK,STXBP2,FGR,BTK,IL1B,SPI1,PVR,FUT7,HLA-F,HLA-E,TNFSF12,JAK3,PRAM1,CLC,PTPN6,CD274,TRAF6,SLC15A4,RAC2,LILRB4,HLA-A,ITGB2,VAMP8,FES,GAB2,CD300A,LYN,PDPK1,RSAD2,BST2,GFER,ITGAM,ICAM1,STAT5B,C17ORF99,SCIMP,CCR2,ARG1,B2M,F2RL1,IL10,FADD,IL4R,CD84,DNASE1L3,IL23A,CD80,LTA,GATA3,IL7R,CD40,CD28,SLAMF1
GO:BP	vacuole organization	GO:0007033	FALSE	1.07E-34	33.9692	239	3059	67	78724	CTSD,LAPTM5,NSFL1C,TFEB,TOM1,RAB7A,RNASEK,WIPI1,ATP6V0A1,GRN,ATG9A,LAMP1,TBC1D14,RAB3GAP2,LIPA,ATG3,MTMR3,ATP6AP1,CHMP4B,CHMP2A,CORO1A,CHMP1A,UBXN2B,VPS4B,MFN2,ARSB,PINK1,PSEN1,LAMTOR1,FIG4,CLN3,ARL8B,PHF23,TRAF6,VPS16,HEXB,VPS35,GABARAP,ATP6V0C,MYO7A,TCIRG1,ATG4B,ATG13,ANXA2,CHMP1B,RAB5A,SCARB2,HOOK3,ATG7,ATP6V1A,CHMP2B,TFE3,EPHB2,WIPI2,ULK1,ATP6V0B,NAGPA,CLN6,RAB43,LAMP2,LRRK2,GAA,SNX30,STX17,M…
GO:BP	response to peptide hormone	GO:0043434	FALSE	2.32E-34	33.6347	440	3059	89	78724	CTSD,AGTRAP,GSK3A,GAB1,RETN,BLVRB,MAPK1,RAB13,SRSF4,SLC9A1,PRKCD,CEACAM1,YWHAG,PTPRE,GRB10,HDAC5,GRB2,SESN2,RAB10,SORT1,PXN,SLC2A1,JAK2,GNAI2,IL1B,PRKACA,ZNF592,FUT7,TLR2,SHC1,CYFIP1,STXBP3,SH2B2,HADHA,JAK3,RB1,WDTC1,IRS2,TYK2,INHBA,EIF6,CSK,SRD5A1,MAPK14,ECHDC3,RANGAP1,RPS6KB2,BSG,PPARG,NCOA2,PDK4,COMT,FBP1,SP1,STAT5A,EIF2B5,INPP5K,SORL1,LYN,STAT2,PDPK1,PAX6,TEK,AHCYL1,INSIG2,HSF1,STAT5B,IGF1R,Z…
GO:BP	positive regulation of cell-cell adhesion	GO:0022409	FALSE	3.35E-34	33.4743	328	3059	77	78724	EMILIN2,F11R,FLOT2,BCL6,NLRP3,SASH3,SMARCD3,YWHAG,VAV1,SYK,PYCARD,JAK2,IL1B,LGALS1,PTPN23,CORO1A,BRD4,FUT7,PLAUR,HLA-E,HLX,PTPN6,TYK2,CD274,TRAF6,CSK,CEACAM6,TNFRSF14,LILRB4,HLA-A,EFNB2,ITGB2,MMRN1,SHB,TNFSF14,LYN,VSIR,PDPK1,FOXO3,ALOX5,CD44,ZMIZ1,ELANE,STAT5B,ST3GAL4,ZBTB7B,CCR2,SELE,AP3D1,B2M,ADAM8,CD4,IL10,FADD,IL4R,BRD2,DNAJA3,ETS1,HLA-DOA,IL23A,CD80,GATA3,ANK3,CAV1,DPP4,HLA-DOB,IGF1,HLA-DRB5…
GO:BP	multicellular organismal reproductive process	GO:0048609	FALSE	5.24E-34	33.2808	1000	3059	137	78724	CTSB,GSK3A,PTEN,RETN,CTNNB1,DEAF1,BCL6,APOL2,SLCO4C1,FBXW11,DPCD,SRPK1,SLIRP,MAP2K6,VDR,CETN2,AGFG1,TDRD9,PANX1,NR6A1,PRKACA,TDRD7,APP,IGF2R,MSH6,ZGLP1,SLC2A14,SMAD1,FOLR1,QKI,DHH,UBB,ANG,RB1,SBF1,P2RX1,INHBA,TRIM28,SPACDR,SLC22A16,SLC9A8,C3ORF62,SLC26A8,HEXB,NDRG3,NCOR2,BSG,SUFU,DAZAP1,PI3,STAU1,NANOS3,FOLR2,SHB,ABHD2,PROK2,ROPN1L,CCNI,CBS,RAN,INSL3,PTX3,GALNT3,SMCHD1,SGPL1,FOXO3,CRKL,TGFBR1,SFR…
GO:BP	regulation of growth	GO:0040008	FALSE	6.15E-34	33.2113	604	3059	104	78724	LAMTOR2,SEMA4D,TWF2,GSK3A,PTEN,SIPA1,NRG1,SERTAD1,EXTL3,BCL6,SASH3,CDKN2C,DIP2B,FOSL2,SLC9A1,CLSTN1,S100A8,CEACAM1,KIAA0319,TKT,SESN2,IST1,APP,S100A9,MT1F,G6PD,CYFIP1,KAZALD1,HLX,STK4,EXOSC4,NAIF1,LAMTOR1,RB1,STK3,INHBA,RTN4,SPHK1,MAPK14,BRCA1,BRAT1,NDRG3,PPARG,NUBP1,HIF1A,PLAC8,FBP1,CXCR4,DUSP6,STAT5A,RAB21,MUL1,CDA,SGPL1,CRKL,TGFBR1,IP6K2,SFRP1,ZMPSTE24,HSPA1A,CTDP1,MFSD2A,BST2,ADAM17,PPIB,STAT…
GO:BP	regulation of cell cycle process	GO:0010564	FALSE	7.96E-34	33.0991	720	3059	114	78724	MIIP,NSFL1C,CCND3,PTEN,ANAPC11,CTNNB1,BCL6,FBXO6,GNB1L,CDKN2C,SMARCD3,CETN2,AURKAIP1,ATF5,SVIL,IL1B,CHMP4B,CHMP2A,PDGFRB,PSME1,APP,CHMP1A,BRD4,SMPD3,UBXN2B,VPS4B,NUSAP1,PLSCR1,KIF13A,PSME2,SPAST,PARP9,PPP1R10,CEP63,DTX3L,RB1,PTPN6,INHBA,PAF1,CTDSP1,SPHK1,KLHL18,RAD9A,MAPK14,BRCA1,FZR1,NUBP1,PKD1,PRPF19,GFI1B,LYN,RAE1,DUSP1,SFRP1,DAPK3,BAZ1B,ZMPSTE24,CALM3,WAC,HSPA1A,RBBP8,BUB3,MBLAC1,CHMP1B,BID,P…
GO:BP	glycerolipid metabolic process	GO:0046486	FALSE	9.09E-34	33.0416	398	3059	84	78724	AGPAT2,PTEN,AGPAT3,INPP5D,ITPKC,APOA1,LIPA,CDIPT,LYPLA2,PTDSS2,OSBPL5,MTMR3,PRDX6,DGKG,PLSCR1,NR1H3,PIK3R5,ACSL3,HADHA,FIG4,MBOAT7,GPAA1,CLN3,PIGO,PNPLA2,PLA2G15,SLC22A4,DGAT1,AGPAT1,ABHD3,IP6K1,PITPNM1,PIGS,BMX,SYNJ1,CDS2,ABHD2,APOBR,LPCAT2,INPP5K,SLC44A1,DBI,SERAC1,SORL1,MGLL,PLA2G4A,MBOAT2,IP6K2,TTC7B,IPMK,TMEM86B,TTC7A,MFSD2A,INSIG2,PTDSS1,PIK3CG,DGKD,DGAT2,FBXW7,INPP5A,GAL3ST1,LPCAT3,LPGAT1,…
GO:BP	cell morphogenesis involved in neuron differentiation	GO:0048667	FALSE	1.54E-33	32.8123	599	3059	103	78724	MAP2K2,SEMA4D,TWF2,B4GALT5,PTEN,MARK2,DBN1,GLA,GFRA3,EFNA4,RAC1,MAP1S,DIP2B,SEMA4A,CSF1R,KIAA0319,RHOG,LYPLA2,IST1,RAB10,NUMBL,FBXO45,MEF2A,SIPA1L1,APP,PDLIM5,CYFIP1,KIF13B,SPAST,PSEN1,CUX1,ACTG1,RB1,RTN4,CDK5R1,S100A6,SLC30A1,EFNB2,B3GNT2,PLXNA2,MYO7A,VASP,RAB21,MAP2K1,EFNA3,PAX6,PITPNA,TIAM2,MFSD2A,APLP2,NCAM1,CNP,ADAM17,PLXNB2,FSTL4,IGF1R,FGF13,NOTCH2,EPHB2,ULK1,SPG21,BMPR1B,CUL7,ANKRD24,PAFAH…
GO:BP	regulation of tumor necrosis factor production	GO:0032680	FALSE	1.70E-33	32.7689	166	3059	56	78724	CYBA,ELF4,LILRA5,TYROBP,TICAM1,SASH3,FRMD8,SYK,MAPKAPK2,PYCARD,TSPO,ORM2,JAK2,BTK,MMP8,APP,TNFRSF8,TLR2,HLA-E,LTF,TLR1,PSEN1,BPI,IRAK3,PTPN6,ORM1,HSPB1,MYD88,LILRB4,LY96,VSIR,TIRAP,DICER1,CARD9,GSTP1,CLEC4A,ZFP36,ADAM17,CCR2,EPHB2,IFNGR1,CD14,FCGR3A,OAS1,IL37,IL10,FADD,GAS6,LRRK2,LILRA4,POMC,CD84,IL23A,IGF1,SLAMF1,AXL
GO:BP	tumor necrosis factor production	GO:0032640	FALSE	1.70E-33	32.7689	166	3059	56	78724	CYBA,ELF4,LILRA5,TYROBP,TICAM1,SASH3,FRMD8,SYK,MAPKAPK2,PYCARD,TSPO,ORM2,JAK2,BTK,MMP8,APP,TNFRSF8,TLR2,HLA-E,LTF,TLR1,PSEN1,BPI,IRAK3,PTPN6,ORM1,HSPB1,MYD88,LILRB4,LY96,VSIR,TIRAP,DICER1,CARD9,GSTP1,CLEC4A,ZFP36,ADAM17,CCR2,EPHB2,IFNGR1,CD14,FCGR3A,OAS1,IL37,IL10,FADD,GAS6,LRRK2,LILRA4,POMC,CD84,IL23A,IGF1,SLAMF1,AXL
GO:BP	regulation of adaptive immune response based on somatic recombination of immune receptors built from immunoglobulin superfamily domains	GO:0002822	FALSE	1.75E-33	32.7561	202	3059	61	78724	ASCL2,LOXL3,TNFRSF1B,RIPK3,BCL6,NLRP3,SASH3,NDFIP1,SECTM1,WAS,CR1L,CEACAM1,YWHAG,JAK2,BTK,IL1B,LGALS1,BATF,PVR,BRD4,FUT7,HLA-F,HLA-E,TNFSF12,HLX,JAK3,CLC,PTPN6,TYK2,CD274,TRAF6,SLC15A4,LILRB4,HLA-A,RC3H1,STAT5A,PLA2G4A,RSAD2,CARD9,C17ORF99,ZBTB7B,CCR2,EPHB2,SLC11A1,ARG1,B2M,CD4,IL10,FADD,IL4R,BRD2,IL23A,CD80,LTA,GATA3,IL7R,CD40,CD28,NLRP10,SLAMF1,OPA1
GO:BP	vacuolar transport	GO:0007034	FALSE	2.49E-33	32.6036	174	3059	57	78724	VPS37B,LAPTM5,RAB7A,NDFIP1,GRN,LAMP1,LIPA,VPS37C,SORT1,SNX27,CHMP4B,CHMP2A,PTPN23,MGRN1,IGF2R,CHMP1A,VPS4B,VPS39,PSAP,KIF13A,ARSB,PINK1,DTX3L,CLN3,ARL8B,VPS16,ATP6V0D1,STAM2,CACNG8,RHOB,VPS35,VTA1,SORL1,CACNG4,DENND3,HSPA1A,CHMP1B,MON1A,PXK,SCARB2,HOOK3,SQSTM1,SLC48A1,TSG101,LRP1,CHMP2B,AP3D1,SNF8,NAGPA,PLEKHF2,HGSNAT,LAMP2,ZFYVE16,LRRK2,VTI1B,VPS52,SLC30A4
GO:BP	chordate embryonic development	GO:0043009	FALSE	2.78E-33	32.5565	671	3059	109	78724	MAFG,CEBPA,ASCL2,TFEB,CTNNB1,DEAF1,MAPK1,DBN1,ATP11A,ITPK1,BMP2,GRB2,EPN1,PCSK5,CCM2,PRKACA,CEBPB,KLF2,SPINT1,TRIP6,EGLN1,MFN2,FOLR1,STK4,PSEN1,MGAT1,STK3,WDTC1,HS6ST1,BRK1,RTN4,TRIM28,CTR9,TRAF6,APAF1,SLC39A1,BRCA1,SLC30A1,SUFU,PLXNA2,PLOD3,PKD1,TMEM107,HIF1A,VASP,DNAJB6,MAP2K1,EPAS1,INPP5K,HM13,XYLT1,NDST1,TGFBR1,SFRP1,PAX6,POLB,RBBP8,CHST11,MIB1,ZMIZ1,NPM2,PTPN18,NSDHL,PLXNB2,ACVRL1,HORMAD1,DA…
GO:BP	protein localization to membrane	GO:0072657	FALSE	3.22E-33	32.4924	827	3059	122	78724	NCF1,NDUFB1,VPS37B,RAB32,F11R,ZDHHC12,FLOT2,TESC,RAB7A,VPS26B,CD53,RAB13,CLSTN1,FRMD8,RAB3GAP2,RHOG,VPS37C,TM9SF2,RAB10,ATG3,AKAP5,ATP6AP1,CHMP4B,EHD4,KIF13A,ATP1B3,HPS6,ACSL3,LAMTOR1,PRAM1,CLN3,ZDHHC3,CDK5R1,MYADM,GBP1,TRAF6,CSK,TMEM88,ZDHHC19,SAMM50,EHD1,VPS35,HSP90AA1,SLC30A1,BSG,GABARAP,PPP2R5A,ITGB2,VAMP8,TMBIM1,KCNE1,SIL1,PICK1,INPP5K,AP2M1,RRAGA,SSH1,SORL1,PDPK1,CRKL,LIN7A,GSN,TTC7B,LRRC4,…
GO:BP	regulation of nervous system development	GO:0051960	FALSE	5.19E-33	32.2852	457	3059	89	78724	MAP2K2,SEMA4D,TWF2,PTEN,DYNLT1,ASCL2,TNFRSF1B,CTNNB1,DBN1,DIP2B,SMARCD3,BMP2,SEMA4A,CLSTN1,KIAA0319,IST1,TSPO,NUMBL,IL1B,SPINT1,NF2,TLR2,CYFIP1,QKI,PSEN1,CUX1,FIG4,RB1,KDM4A,RGS14,RTN4,CTDSP1,CST7,SLC30A1,PPARG,MBD1,PLXNA2,HIF1A,CXCR4,RAB21,MAP2K1,HAPLN2,TYMP,SORL1,NPTN,LYN,PAX6,DICER1,TIAM2,FXR2,ANXA2,HOOK3,PLXNB2,FSTL4,PRMT5,RNF10,FGF13,LRRN1,EPHB2,ULK1,CLSTN3,B2M,CUL7,FMR1,PAFAH1B1,VEGFA,SEMA3…
GO:BP	positive regulation of organelle organization	GO:0010638	FALSE	1.02E-32	31.9899	492	3059	92	78724	GSK3A,ANAPC11,ARPC2,CTNNB1,TOM1,CDC42EP4,WIPI1,LCP1,MAPK1,GRN,RAC1,APOA1,RAB3GAP2,CLIP1,GRB2,PYCARD,PXN,IL1B,PDGFRB,ARL2,SMPD3,NF2,RUVBL2,PLAUR,VPS4B,NUSAP1,CYFIP1,PINK1,SPAST,BAK1,PPP1R10,FSCN1,INO80C,RB1,BRK1,CDK5R1,SPHK1,CALCOCO2,WDR1,VPS35,HSP90AA1,MSN,SYNJ1,VASP,FES,TFPT,INO80B,MMP9,MUL1,MAPRE1,TGFBR1,SFRP1,GSN,HCK,HSPA1A,TERF2IP,ANXA2,ARHGEF5,BID,NPM2,CCT7,HSF1,ULK1,TNFSF10,ATL3,PHIP,PML,BA…
GO:BP	nucleobase-containing compound catabolic process	GO:0034655	FALSE	1.09E-32	31.9609	535	3059	96	78724	HK2,GSK3A,HK3,RNASE2,RNASEL,UPF1,TNFRSF1B,GTPBP1,SLIRP,SMPDL3A,SMG5,DNASE2,PRKCD,ISG20,LIPA,MAPKAPK2,UPP1,RNASE3,PGM1,ARL2,PRKACA,APP,NT5C2,NMNAT1,EXOSC1,QKI,EXOSC4,PSEN1,ANG,MGAT1,SIDT2,EIF6,ENTPD1,MYD88,TPI1,APAF1,MAPK14,SUCLG1,XRN1,ALDOA,CNOT8,DPYD,HIF1A,NANOS3,CARHSP1,FBP1,RC3H1,GALK1,HNRNPC,GAPDH,TYMP,CDA,ZC3HAV1,PGAM1,VIM,TARDBP,TIRAP,LDHA,NUDT1,DICER1,HDAC4,HSPA1A,DEDD2,FXR2,SUCLA2,RBM47,S…
GO:BP	positive regulation of protein phosphorylation	GO:0001934	FALSE	1.31E-32	31.8815	483	3059	91	78724	MAP2K2,NCF1,SEMA4D,GSK3A,CCND3,S100A12,MARK2,LILRA5,NRG1,RIPK3,ARRB1,MAPK1,HCLS1,RAC1,PRKCD,BMP2,CSF1R,SYK,OPRD1,TNFSF18,JAK2,IL1B,PDGFRB,APP,LRRK1,CAMKK2,PLAUR,EHD4,LTF,JTB,MAP3K5,PIK3R5,PINK1,STK4,PARP9,SPHK1,TRAF6,BRAT1,HSP90AA1,TNFRSF14,NEDD9,MAP2K1,MMP9,NPTN,LYN,PDPK1,CRKL,MAP3K11,IP6K2,CD44,CALM3,TEK,ARHGEF5,TLR6,ELANE,PIK3CG,MAP3K10,ADAM17,LIMK2,NOS1,FBXW7,MAP2K3,SLC11A1,FNIP2,CALM2,FMR1,V…
GO:BP	positive regulation of cellular component biogenesis	GO:0044089	FALSE	1.54E-32	31.8126	505	3059	93	78724	SEMA4D,TWF2,ARAP1,ARPC2,NRG1,RAB7A,CDC42EP4,WIPI1,LCP1,MAP4K4,RAC1,SEMA4A,APOA1,CLSTN1,SYK,RAB3GAP2,CLIP1,GRB2,PYCARD,PXN,BTK,CHMP2A,ARL2,SMPD3,NF2,VPS4B,CYFIP1,PINK1,BAK1,MIEN1,FSCN1,BRK1,CDK5R1,EPS8L1,MYD88,RAC2,ACTR2,HSP90AA1,MSN,VASP,FES,MAPRE1,TGFBR1,TIRAP,SFRP1,HCK,TEK,ZDHHC5,HSPA1A,ARHGEF5,TLR6,BID,POLDIP2,HSF1,ACVRL1,TSG101,ACTR3,MTLN,CDC34,LRRN1,EPHB2,FNIP2,COL16A1,ULK1,CLSTN3,FMR1,SNF8,…
GO:BP	vesicle-mediated transport in synapse	GO:0099003	FALSE	1.55E-32	31.8104	257	3059	67	78724	PTEN,DENND1A,CTNNB1,NRG1,RAB7A,DNAJC5,ATP6V0A1,BTBD9,CLSTN1,TOR1A,ITSN1,AP2S1,SNAP29,ATP6AP1,FBXO45,SYP,ATP6V1E1,CLTA,SLC4A8,CYFIP1,SYN2,PSEN1,ACTG1,P2RX1,CDK5R1,ABCA13,ATP6V0D1,NAPA,VPS35,EFNB2,ATP6V0C,SYNJ1,AP2M1,FBXL20,SLC17A5,CALM3,SYN1,RAB5A,ATP6V1A,ATP6V1B2,ATP6V1C1,AP3D1,MDM2,CALM2,PLD1,FMR1,GIT2,PICALM,ARPC3,AP2A1,PLD2,CLCN3,LRRK2,NCDN,OSBPL2,RNF220,SYT17,ATP6V1G2,BTBD8,RIMS3,PRRT2,HTR1B,…
GO:BP	regulation of transmembrane transport	GO:0034762	FALSE	1.62E-32	31.7892	443	3059	87	78724	CYBA,TRPC6,HK2,GSK3A,RNASEL,WWP2,TESC,OAZ2,DIAPH1,CD63,CTSS,SLC9A1,GRB10,UBASH3B,ASPH,AKAP5,IL1B,MEF2A,GNB2,PRKACA,SLC43A2,SLC31A2,CORO1A,G6PD,SLC8A1,STXBP3,OAZ1,ATP1B3,BAK1,PSEN1,GPR35,IRS2,PTPN6,P2RX1,KCNAB2,KCNJ15,CACNG8,MAPK14,KCNJ2,SLC30A1,TCIRG1,CHRM3,KCNE1,INPP5K,MMP9,RRAD,GSTO1,LYN,KCNE3,CACNG4,PDPK1,TMSB4X,CALM3,OXSR1,AHCYL1,FKBP1A,PIK3CG,NOS1,CAPN1,FGF13,CCR2,ANO6,EPHB2,CALM2,STAC3,FMR1…
GO:BP	chromatin organization	GO:0006325	FALSE	3.27E-32	31.4861	884	3059	125	78724	GSK3A,MIER2,JDP2,BCL6,JMJD6,RCOR1,SRPK1,SMARCD3,TADA2B,BANP,PARP10,HDAC5,DDX23,TDRD9,HMG20B,PCGF3,CREBBP,JAK2,SRPK2,SPI1,SETDB1,KLF2,PHF13,BRD4,NAA60,RUVBL2,LBR,MSL1,PADI2,SAFB,CHRAC1,INO80C,DTX3L,RB1,KDM4A,TRIM28,CTR9,PHF2,HIRA,MYD88,TADA3,BRCA1,UBE2A,PHF21A,MBD1,PPM1D,KDM4B,SMARCAL1,HNRNPC,MSL3,SOX1,PADI4,CGGBP1,TFPT,INO80B,BAZ1A,GFI1B,SMCHD1,DAPK3,PAX6,NFE2,BAZ1B,BCORL1,HNRNPK,UBR2,ZMPSTE24,WA…
GO:BP	positive regulation of leukocyte cell-cell adhesion	GO:1903039	FALSE	3.38E-32	31.4716	277	3059	69	78724	FLOT2,BCL6,NLRP3,SASH3,SMARCD3,YWHAG,VAV1,SYK,PYCARD,JAK2,IL1B,LGALS1,CORO1A,BRD4,FUT7,HLA-E,HLX,PTPN6,TYK2,CD274,TRAF6,CSK,TNFRSF14,LILRB4,HLA-A,EFNB2,ITGB2,SHB,TNFSF14,LYN,VSIR,PDPK1,FOXO3,ALOX5,CD44,ZMIZ1,ELANE,STAT5B,ST3GAL4,ZBTB7B,CCR2,SELE,AP3D1,B2M,ADAM8,CD4,FADD,IL4R,BRD2,DNAJA3,ETS1,HLA-DOA,IL23A,CD80,GATA3,CAV1,DPP4,HLA-DOB,IGF1,HLA-DRB5,IL7R,CD83,CD28,ICOSLG,CD27,SLAMF1,HLA-DPB1,OPA1,R…
GO:BP	regulation of neurogenesis	GO:0050767	FALSE	3.70E-32	31.4312	378	3059	80	78724	MAP2K2,SEMA4D,TWF2,PTEN,DYNLT1,ASCL2,TNFRSF1B,CTNNB1,DBN1,DIP2B,SMARCD3,BMP2,KIAA0319,IST1,TSPO,NUMBL,IL1B,SPINT1,NF2,TLR2,CYFIP1,QKI,PSEN1,CUX1,RB1,KDM4A,RGS14,RTN4,CTDSP1,SLC30A1,PPARG,MBD1,PLXNA2,HIF1A,CXCR4,RAB21,MAP2K1,HAPLN2,SORL1,NPTN,LYN,PAX6,DICER1,TIAM2,FXR2,ANXA2,HOOK3,PLXNB2,FSTL4,PRMT5,RNF10,FGF13,EPHB2,ULK1,B2M,CUL7,FMR1,PAFAH1B1,VEGFA,SEMA3A,IL34,S100A10,SLC7A5,TTBK1,ARHGAP32,ELL3,…
GO:BP	response to tumor necrosis factor	GO:0034612	FALSE	5.57E-32	31.2541	229	3059	63	78724	LAPTM5,CEBPA,CASP1,TNFRSF1B,MAPK1,CAMP,APOA1,SYK,MAPKAPK2,TNFSF18,PYCARD,JAK2,MMP8,CARD16,KLF2,CARD8,SHARPIN,SMPD3,MAP3K5,GBP1,SPHK1,TRAF6,MAPK14,ASAH1,BRCA1,TNFRSF14,NAIP,RFFL,GPS2,INPP5K,RRAGA,HIPK1,TMSB4X,FOXO3,SFRP1,DICER1,HSPA1A,GSTP1,GFER,ZFP36,ADAM17,PIAS4,POSTN,CD14,SELE,ULK1,XIAP,SPPL2A,CXCL16,F2RL1,HSPA1B,GBP2,MIB2,GAS6,TNFRSF19,TNFRSF17,KRT18,AFF3,GATA3,TRAF5,RORA,CD40,KRT8
GO:BP	regulation of hydrolase activity	GO:0051336	FALSE	6.32E-32	31.199	352	3059	77	78724	SEMA4D,ARAP1,TBC1D10B,PSENEN,GRN,MAP4K4,PRKCD,RALGAPA2,BMP2,APOA1,TBC1D2,TIMP2,VAV1,RAB3GAP2,RHOG,SORT1,SERPINB8,FGD3,SIPA1L1,ARL2,EGLN1,NR1H3,PSAP,PINK1,APH1B,GMIP,VAV3,SRGAP2,CST7,RANGAP1,SERPINB6,TFPI,CSTA,FGD4,GAPDH,PTX3,EFNA3,LYN,VSIR,PDPK1,SFRP1,CALM3,HSPA1A,TIAM2,CCDC125,ARHGEF5,SEMG1,PRELID1,PLXNB2,NOS1,LRP1,CTSH,ABR,OAS1,CALM2,F2RL1,RCN3,IQGAP1,LRRK2,RRP1B,S100A10,PPP1R17,ASAP3,SH3BP4,RG…
GO:BP	gliogenesis	GO:0042063	FALSE	6.32E-32	31.199	352	3059	77	78724	MAP2K2,B4GALT5,NDUFS2,PTEN,ASCL2,TNFRSF1B,CTNNB1,MAPK1,GRN,GPR17,CDKN2C,BMP2,CSF1R,S100A8,GRB2,TSPO,IL1B,APP,S100A9,SPINT1,OLIG1,NF2,TLR2,QKI,PSEN1,APCDD1,MBOAT7,RB1,KDM4A,NDRG1,RTN4,CDK5R1,MYD88,CSK,WDR1,SRGAP2,C5AR1,HEXB,PPARG,MBD1,CXCR4,EIF2B5,MAP2K1,HAPLN2,SOX1,PICK1,MOBP,VIM,LYN,CRKL,PAX6,DICER1,C1QA,ZMIZ1,CNP,PRMT5,RNF10,LRP1,CCR2,IFNGR1,PAFAH1B1,RRAS2,IL34,SLC7A5,FA2H,TTBK1,GPR183,LEPR,LTA…
GO:BP	lymphocyte mediated immunity	GO:0002449	FALSE	6.71E-32	31.173	381	3059	80	78724	TNFRSF1B,RIPK3,BCL6,NLRP3,SASH3,INPP5D,NDFIP1,UNC13D,PRKCD,SECTM1,WAS,LAMP1,CR1L,CEACAM1,YWHAG,VAV1,TLR8,FCER1G,GRB2,PLEKHM2,BTK,IL1B,BATF,PVR,CORO1A,FUT7,MSH6,PRDX1,HLA-F,HLA-E,TNFSF12,ARL8B,CLC,C1RL,PTPN6,CD274,TRAF6,SLC15A4,MYD88,LILRB4,HLA-A,TCIRG1,UNC93B1,RSAD2,CARD9,C1QA,CSF2RB,GFER,JAG1,ICAM1,STAT5B,C17ORF99,CTSH,SERPING1,RAB27A,CCR2,FCGR3A,ARG1,B2M,IL10,FADD,IL4R,TUBB4B,MPL,CCR6,AIRE,IL23…
GO:BP	coagulation	GO:0050817	FALSE	7.19E-32	31.143	238	3059	64	78724	EMILIN2,F11R,GLA,F12,PRKCD,ITPK1,WAS,CEACAM1,VAV1,HPSE,SYK,FCER1G,UBASH3B,FERMT3,JAK2,SERPINA1,DGKG,PLAUR,PLSCR1,STXBP3,ANXA4,HPS6,PSEN1,ACTG1,ANXA5,VAV3,PTPN6,GGCX,P2RX1,ENTPD1,HSPB1,PRDX2,MAPK14,TFPI,F5,MMRN1,PLA2G4A,LYN,PAPSS2,CD59,ANXA2,SEMG1,PIK3CG,DGKD,ST3GAL4,PROC,SERPING1,RAB27A,ANO6,EPHB2,GNA13,MYL12A,F2RL1,C1QTNF1,GAS6,BLOC1S3,SERPINB2,CSRP1,PLAU,CAV1,F2RL2,LMAN1,CD40,AXL
GO:BP	hemostasis	GO:0007599	FALSE	7.19E-32	31.143	238	3059	64	78724	EMILIN2,F11R,GLA,F12,PRKCD,ITPK1,WAS,CEACAM1,VAV1,HPSE,SYK,FCER1G,UBASH3B,FLI1,FERMT3,JAK2,SERPINA1,DGKG,PLAUR,PLSCR1,STXBP3,HPS6,ACTG1,ANXA5,VAV3,PTPN6,GGCX,P2RX1,ENTPD1,HSPB1,PRDX2,MAPK14,TFPI,ZNF385A,F5,MMRN1,PLA2G4A,LYN,NFE2,PAPSS2,CD59,ANXA2,PIK3CG,DGKD,ST3GAL4,PROC,SERPING1,RAB27A,ANO6,EPHB2,GNA13,MYL12A,F2RL1,C1QTNF1,GAS6,BLOC1S3,SERPINB2,CSRP1,PLAU,CAV1,F2RL2,LMAN1,CD40,AXL
GO:BP	response to oxygen levels	GO:0070482	FALSE	8.48E-32	31.0715	344	3059	76	78724	AGTRAP,HK2,NDUFS2,ASCL2,PDK3,FOSL2,SLC9A1,BMP2,OPRD1,POLR2A,SLC2A1,CREBBP,ATP6AP1,HIF3A,EGLN1,TLR2,PINK1,ANG,CPEB4,NDRG1,INHBA,RTN4,ATP6V0D1,APAF1,P4HB,PPARG,HIF1A,COMT,CXCR4,BNIP2,PLOD2,CASP9,CBS,EPAS1,PICK1,FOXO3,SFRP1,CBL,TEK,POLB,TBL2,ATG7,ADAM17,PLOD1,NOS1,HSF1,USP19,ACVRL1,ATP6V1A,POSTN,SLC29A1,TM9SF4,MDM2,ACAA2,PML,VEGFA,ADAM8,CFLAR,BBC3,MPL,ALKBH5,CYB5R4,SLC7A5,PLAU,SMAD3,OXTR,LTA,EPHA4,C…
GO:BP	energy derivation by oxidation of organic compounds	GO:0015980	FALSE	1.05E-31	30.9801	345	3059	76	78724	NDUFB1,GSK3A,NDUFS2,WIPI1,UQCR10,NDUFB4,UQCRQ,GRB10,PPP1R3D,IL10RB,NDUFA1,ATG3,GHITM,GBE1,CISD1,ARL2,PHKG1,MFN2,PINK1,GYG1,IFNAR1,NDUFV2,NDUFC1,ACO1,IRS2,ACADVL,COX7A2,NDUFC2,SUCLG1,COX5A,HIF1A,COMT,PYGB,COX6B1,INPP5K,NDUFA11,IDH1,PHKA2,ATP5MF,CS,COX6A1,SUCLA2,NDUFB6,COQ10B,BID,PYGM,PRELID1,BLOC1S1,STK40,SLC25A14,NDUFB3,MTLN,SDHAF2,WIPI2,COX8A,OAS1,PRDM16,UQCR11,PANK2,COX5B,MDH2,UQCRFS1,PPP1R3B,A…
GO:BP	axon development	GO:0061564	FALSE	1.12E-31	30.9526	528	3059	94	78724	MAP2K2,SEMA4D,TWF2,B4GALT5,PTEN,MARK2,GRN,GLA,GFRA3,EFNA4,RAC1,MAP1S,DIP2B,SEMA4A,CSF1R,KIAA0319,RHOG,LYPLA2,IST1,RAB10,TSPO,NUMBL,JAK2,FBXO45,SIPA1L1,APP,OLIG1,CYFIP1,KREMEN1,FOLR1,KIF13B,SPAST,PSEN1,ACTG1,RTN4,CDK5R1,S100A6,EFNB2,B3GNT2,PTPRF,PLXNA2,VASP,RAB21,MAP2K1,EFNA3,PAX6,PITPNA,TIAM2,APLP2,NCAM1,CNP,ADAM17,PLXNB2,FSTL4,IGF1R,FGF13,NOTCH2,EPHB2,ULK1,SPG21,BMPR1B,PAFAH1B1,VEGFA,SEMA3A,NTNG…
GO:BP	proteasome-mediated ubiquitin-dependent protein catabolic process	GO:0043161	FALSE	1.29E-31	30.8891	414	3059	83	78724	GSK3A,NSFL1C,CEBPA,ANAPC11,UBE2S,CTNNB1,WWP2,AKIRIN2,ARRB1,FBXO6,RAD23A,FBXW11,DCAF11,FBXO27,RBCK1,FBXO45,PSMD13,SHARPIN,MAEA,KCTD5,UBXN2B,FBXL5,PSMD2,PSEN1,UBE2H,PSMD4,TRIM28,DDIT3,TBL1X,FZR1,UBE2A,GABARAP,RFFL,USP25,PSMC3,UBR4,WDR26,FBXL20,KBTBD7,SIAH2,PSMB9,UBR2,ANAPC13,WAC,TRPC4AP,HSPA1A,PSMB4,PSMC5,PSMA5,AMN1,PSMB2,PCBP2,TTC36,RNF10,RNF122,FBXW7,CDC34,FBXL6,AGAP3,MDM2,PSMA7,PSMB10,PML,TRIB1,…
GO:BP	regulated exocytosis	GO:0045055	FALSE	1.29E-31	30.889	232	3059	63	78724	SYNGR1,RPH3AL,DNAJC5,UNC13D,LAMP1,CEACAM1,SYK,STXBP2,RAB10,FGR,SNAP29,GNAI2,BTK,FBXO45,SYP,SPI1,CORO1A,SLC4A8,HLA-F,STXBP3,SYN2,PSEN1,PRAM1,ARL8B,P2RX1,RAC2,SYNGR2,NAPA,SYNJ1,ITGB2,VAMP8,FES,GAB2,CD300A,FBXL20,LYN,PDPK1,LAT2,CBL,HCK,SYN1,RAB5A,PIK3CG,ITGAM,ANXA3,RAB27A,CCR2,FCGR3A,FMR1,F2RL1,IL4R,LRRK2,OSBPL2,CD84,SYT17,RIMS3,RAB11FIP2,PRRT2,HTR1B,RAPGEF4,CPLX1,SYNGR3,BRSK1
GO:BP	regulation of neuron projection development	GO:0010975	FALSE	1.71E-31	30.7675	446	3059	86	78724	MAP2K2,SEMA4D,TWF2,GSK3A,PTEN,MARK2,FKBP4,GRN,DBN1,GLA,MAP4K4,DIP2B,KIAA0319,IST1,SIPA1L1,S100A9,PREX1,DGKG,STYXL1,PDLIM5,TMEM30A,CYFIP1,KREMEN1,ARSB,KIF13B,PSEN1,CUX1,DENND5A,RTN4,CDK5R1,EHD1,SLC30A1,EFNB2,PTPRF,PLXNA2,RAB21,FES,MAP2K1,VIM,NPTN,LYN,CRKL,SFRP1,PAX6,TIAM2,MFSD2A,SCARB2,PLXNB2,FSTL4,IGF1R,FGF13,EPHB2,ULK1,MDM2,B2M,CUL7,PAFAH1B1,VEGFA,CAMK2G,SEMA3A,NTNG2,TANC2,AP2A1,PAK1,CFLAR,LRRK2…
GO:BP	regulation of leukocyte proliferation	GO:0070663	FALSE	2.01E-31	30.6964	267	3059	67	78724	TYROBP,TNFRSF1B,TICAM1,CTNNB1,RIPK3,BCL6,SASH3,MAPK1,INPP5D,NDFIP1,CSF1R,SYK,TNFSF18,PYCARD,JAK2,BTK,IL1B,CEBPB,CORO1A,CSF2RA,HLA-E,IRF1,VAV3,IRS2,CLC,PTPN6,TYK2,CD274,TRAF6,MYD88,RAC2,TNFRSF14,LILRB4,HLA-A,RC3H1,CD300A,LYN,VSIR,TIRAP,GSTP1,BST2,BID,CSF2RB,STAT5B,CNN2,LGALS12,ZBTB7B,CCR2,EPHB2,FCGR3A,ARG1,IL10,FADD,IL34,MPL,DNAJA3,CTLA4,GPR183,IL23A,CD80,IGF1,CD40,CD28,ICOSLG,CD22,SLAMF1,HLA-DPB1
GO:BP	intrinsic apoptotic signaling pathway	GO:0097193	FALSE	2.46E-31	30.6082	312	3059	72	78724	NACC2,SHISA5,TNFRSF1B,CTNNB1,RIPK3,PRKCD,S100A8,HERPUD1,PYCARD,JAK2,CEBPB,S100A9,STYXL1,MSH6,PTTG1IP,PLAUR,MAP3K5,PINK1,BAK1,UBB,HSPB1,APAF1,DDIT3,RAD9A,BRCA1,P4HB,HIF1A,ZNF385A,CASP9,MMP9,HIPK1,GRINA,HNRNPK,CD44,POLB,HSPA1A,MAPK7,BID,PIAS4,LGALS12,FBXW7,ZNF622,IFI16,FNIP2,MDM2,PARL,DAPK2,PML,E2F2,BAX,IL10,TNFRSF10B,BCL2L11,DNAJA1,VDAC2,LRRK2,CDKN2D,BBC3,HTRA2,CHAC1,HELLS,ELL3,WNT1,CAV1,HYOU1,RRN…
GO:BP	fatty acid metabolic process	GO:0006631	FALSE	3.92E-31	30.4064	400	3059	81	78724	CES1,PDK3,MGST3,CEACAM1,LIPA,LYPLA2,SESN2,TBXAS1,HADHB,IL1B,DEGS1,SLC27A2,AOAH,ALOXE3,HSD17B4,ACOT8,NR1H3,ACSBG1,QKI,ACSL3,HADHA,ACSS2,WDTC1,CBR1,IRS2,ACADVL,PLA2G15,ERLIN1,EIF6,MAPK14,ASAH1,ABHD3,ECHDC3,BRCA1,PPARG,AIG1,ACSF2,PDK4,COMT,ABHD2,ACAA1,ELOVL3,UBR4,DBI,MGLL,PLA2G4A,SGPL1,ADIPOR2,ALOX5,GGT1,DECR1,GSTP1,MFSD2A,INSIG2,AUH,ACADS,CYP2C9,MTLN,ELOVL1,LPGAT1,HSD17B10,ACAA2,PANK2,SLC27A3,ACADM…
GO:BP	developmental maturation	GO:0021700	FALSE	4.47E-31	30.3496	352	3059	76	78724	SEMA4D,B4GALT5,CEBPA,PTEN,RAB32,ANKS1A,CTNNB1,CD63,ATP6V0A1,SCLT1,BMP2,CLSTN1,SNX27,BTK,ATP6AP1,SYP,ATP6V1E1,PRKACA,TDRD7,KLF2,APP,MAEA,G6PD,LTF,ANG,RB1,CDK5R1,ATP6V0D1,RAC2,DDIT3,YWHAZ,VPS35,PPARG,ATP6V0C,HIF1A,SHB,ABHD2,ROPN1L,INSL3,KCNE1,EPAS1,PICK1,XYLT1,FOXO3,TRPC4AP,C1QA,SEMG1,HEATR3,ACVRL1,ATP6V1A,ATP6V1B2,MTCH1,ATP6V1C1,AP3D1,SPG21,VEGFA,PICALM,CLCN3,LSM14B,LRRK2,BLOC1S3,FAM20C,CCR6,ATP6V…
GO:BP	cell growth	GO:0016049	FALSE	6.24E-31	30.2046	485	3059	89	78724	LAMTOR2,SEMA4D,TWF2,GSK3A,SIPA1,CTNNB1,NRG1,SERTAD1,EXTL3,BCL6,CDKN2C,DIP2B,SLC9A1,CLSTN1,S100A8,CEACAM1,KIAA0319,SESN2,IST1,APP,S100A9,PDLIM5,G6PD,CYFIP1,KAZALD1,EXOSC4,NAIF1,LAMTOR1,RB1,INHBA,RTN4,SPHK1,BRCA1,BRAT1,NDRG3,PPARG,NUBP1,FBP1,CXCR4,RAB21,MUL1,CDA,CRKL,TGFBR1,IP6K2,SFRP1,HSPA1A,CTDP1,MFSD2A,BST2,ADAM17,FSTL4,ACVRL1,TSG101,FGF13,POSTN,MEG3,ULK1,CLSTN3,SPG21,PAFAH1B1,PML,VEGFA,BIN3,SEM…
GO:BP	G protein-coupled receptor signaling pathway	GO:0007186	FALSE	6.77E-31	30.1694	1289	3059	153	78724	AGTRAP,GSK3A,DYNLT1,OR1J4,RPH3AL,FCN1,S1PR4,ADORA3,ARRB1,GNA15,GPR84,HRH2,HOMER3,RAC1,GPR17,APOA1,ACKR1,LTB4R,VAV1,GRK6,OPRD1,CCRL2,KLF16,PRKD2,SORT1,JAK2,CCL23,C3AR1,GNB4,AKAP5,GNAI2,SYP,GNB2,PDGFRB,PRKACA,MGRN1,IGF2R,PREX1,OR10H2,YWHAB,PSAP,RGS19,PIK3R5,GNB1,PADI2,GPR35,PTPN6,RGS14,ZDHHC3,CDK5R1,SPHK1,RAC2,C5AR1,CXCL1,CMKLR1,VPS35,FZD2,SUCNR1,GPR27,OXER1,PPARG,OR1Q1,PDCL,HIF1A,CXCR4,PROK2,NLRP6…
GO:BP	membrane lipid metabolic process	GO:0006643	FALSE	7.07E-31	30.1509	214	3059	60	78724	B4GALT5,B3GALT4,MGST2,SAMD8,GLA,SMPDL3A,PRKCD,GBA2,GM2A,PRKD2,TM9SF2,DEGS1,GBGT1,ALOXE3,FUT7,SMPD3,PSAP,GPAA1,PIGO,PLA2G15,P2RX1,NAGA,CEL,SPHK1,HEXB,ASAH1,PIGS,ST3GAL6,TEX2,ELOVL3,B3GNT5,ST3GAL2,SGPL1,B4GALT3,SUMF1,CSNK1G2,SFTPB,SCARB2,NEU1,ST3GAL4,ELOVL1,ST3GAL3,GAL3ST1,SGMS2,BAX,CLN6,PIGF,ST3GAL5,SPNS2,HTRA2,FA2H,B3GALT2,ELOVL4,PIGL,SPTLC3,FUT6,SGPP2,CLN8,ST8SIA1,ST6GALNAC5
GO:BP	cellular response to tumor necrosis factor	GO:0071356	FALSE	1.22E-30	29.9138	208	3059	59	78724	LAPTM5,CEBPA,CASP1,TNFRSF1B,MAPK1,CAMP,APOA1,SYK,MAPKAPK2,TNFSF18,PYCARD,JAK2,MMP8,CARD16,KLF2,CARD8,SHARPIN,SMPD3,MAP3K5,GBP1,SPHK1,TRAF6,MAPK14,ASAH1,BRCA1,TNFRSF14,NAIP,RFFL,GPS2,INPP5K,RRAGA,HIPK1,TMSB4X,FOXO3,SFRP1,DICER1,HSPA1A,GSTP1,GFER,ZFP36,ADAM17,PIAS4,POSTN,ULK1,XIAP,SPPL2A,F2RL1,HSPA1B,GBP2,MIB2,GAS6,TNFRSF19,TNFRSF17,KRT18,GATA3,TRAF5,RORA,CD40,KRT8
GO:BP	biological process involved in symbiotic interaction	GO:0044403	FALSE	1.65E-30	29.7817	225	3059	61	78724	VPS37B,CTSB,DYNLT1,F11R,SELPLG,WWP2,RAB7A,RNASEK,SLC1A5,APOL1,CAMP,PGLYRP1,LAMP1,CHMP4B,CHMP2A,LGALS1,PVR,CHMP1A,VPS4B,PLSCR1,LTF,ARL8B,TRIM25,MYD88,TNFRSF14,EFNB2,BSG,P4HB,TRIM5,CXCR4,NLRP6,VAMP8,GAPDH,CBL,TRIM34,HSPA1A,BST2,CHMP1B,ELANE,NCAM1,SCARB2,ICAM1,ROMO1,TSG101,CHMP2B,ARG1,FMR1,F2RL1,CD4,HSPA1B,BCL2L11,GAS6,NMT2,CD80,SLC10A1,CAV1,DPP4,SLAMF1,CLEC4M,GPR15,AXL
GO:BP	regulation of leukocyte migration	GO:0002685	FALSE	2.08E-30	29.6829	234	3059	62	78724	RIN3,ASCL2,RIPK3,MAPK1,RAC1,CSF1R,TNFSF18,PYCARD,MOSPD2,C3AR1,APP,CORO1A,FUT7,SMPD3,PADI2,CXCL14,RTN4,MYD88,RAC2,C5AR1,MPP1,CMKLR1,TNFRSF14,MSN,NEDD9,TNFSF14,CD300A,LYN,DUSP1,CRKL,TIRAP,OXSR1,LYVE1,ELANE,ADAM17,ICAM1,CNN2,STK10,ST3GAL4,CCR2,ANO6,SELE,DAPK2,VEGFA,ADAM8,F2RL1,MIA3,CALR,PLA2G7,FADD,GAS6,IL34,GDF15,SPNS2,CCR6,AIRE,IL23A,DPP4,PERP,SLAMF1,EDN2,SLIT2
GO:BP	regulation of pattern recognition receptor signaling pathway	GO:0062207	FALSE	2.13E-30	29.6718	172	3059	54	78724	CYBA,ZDHHC12,SMPDL3A,SLC15A3,S100A8,BTK,SLC46A2,S100A9,CARD8,ZCCHC3,LTF,NR1H3,TLR1,EIF2AK2,IRF1,IRAK3,SLC19A1,ZDHHC3,RTN4,SLC15A4,MYD88,CD300LF,NLRX1,GPR108,NLRP6,GPS2,CD300A,ZC3HAV1,LYN,PDPK1,TIRAP,RSAD2,ZDHHC5,HSPA1A,NAGK,TLR6,SQSTM1,MEFV,PCBP2,BANF1,GPATCH3,CD14,XIAP,IFI35,F2RL1,HSPA1B,DHX58,GBP2,LAMP2,NPLOC4,NINJ1,LILRA4,IRF4,CAV1
GO:BP	regulation of DNA-binding transcription factor activity	GO:0051090	FALSE	2.20E-30	29.6571	322	3059	72	78724	NLRC4,PTEN,S100A12,TRIM8,WWP2,RIPK3,ADORA3,ARRB1,BMP2,S100A8,SYK,OPRD1,PARP10,HDAC5,RBCK1,PRKD2,TNFSF18,PYCARD,BTK,IL1B,CTNNBIP1,SPI1,CARD16,S100A9,CARD8,EGLN1,TLR2,LTF,ANXA4,EIF2AK2,RB1,IRAK3,SPHK1,TRAF6,TRIM25,MYD88,DDIT3,CMKLR1,RNF31,FZD2,SUFU,TRIM5,CRTC2,BEX1,NLRP12,TIRAP,HCK,HDAC4,TRIM34,CARD9,HSPA1A,TERF2IP,ARHGEF5,MAP3K10,HSF1,BUD31,ANXA3,TRIB1,IL10,HSPA1B,RPS6KA5,CFLAR,SLCO3A1,RNF220,DNAJ…
GO:BP	nucleotide metabolic process	GO:0009117	FALSE	2.29E-30	29.64	493	3059	89	78724	NDUFB1,HK2,HK3,NDUFS2,TP53I3,PGD,GTPBP1,GPD2,RPIA,NDUFB4,TKT,LIPA,NDUFA1,TSPO,UPP1,PGM1,ARL2,PRKACA,APP,GMPR2,SLC25A22,TJP2,NT5C2,G6PD,NMNAT1,PINK1,TALDO1,PSEN1,NDUFV2,NDUFC1,ABCC6,RBKS,PGLS,NDUFC2,EIF6,IMPDH1,TPI1,MPP1,TPST1,ALDOA,ATP6V0C,TPST2,DPYD,HIF1A,CMPK2,FBP1,RAN,NADSYN1,GALK1,GAPDH,TYMP,CDA,PGAM1,NDUFA11,TMSB4X,IDH1,LDHA,HDAC4,PAPSS2,HSPA1A,ATP5MF,NDUFB6,CNP,ATP6V1A,NDUFB3,NADK,ATP6V1B2,…
GO:BP	developmental growth	GO:0048589	FALSE	2.55E-30	29.5927	663	3059	104	78724	SEMA4D,TWF2,GSK3A,PTEN,CTNNB1,NRG1,SASH3,KLF5,DIP2B,FOSL2,KIAA0319,ATF5,IST1,CCM2,KLF2,APP,SMPD3,PDLIM5,G6PD,CYFIP1,PSAP,RMI1,HLX,SMAD1,STK4,STK3,WDTC1,RTN4,TRIM28,CTR9,PTPN12,MAPK14,PLAC8,COMT,CXCR4,DUSP6,STAT5A,RAB21,FES,PTX3,MUL1,SGPL1,FOXO3,TGFBR1,SFRP1,ZMPSTE24,CTDP1,MFSD2A,CHST11,ZMIZ1,PPIB,STAT5B,FSTL4,STK40,FGF13,NOTCH2,POSTN,NINJ2,ULK1,CLSTN3,SPG21,BMPR1B,PAFAH1B1,VEGFA,BIN3,TAF10,SEMA3A…
GO:BP	lymphocyte activation involved in immune response	GO:0002285	FALSE	2.87E-30	29.5424	227	3059	61	78724	ASCL2,LOXL3,TYROBP,BCL6,NLRP3,LCP1,NDFIP1,UNC13D,PGLYRP1,SEMA4A,LAMP1,CEACAM1,FCER1G,TNFSF18,LGALS1,BATF,CLEC4E,CORO1A,BRD4,APBB1IP,MSH6,HLA-F,TNFSF12,HLX,PSEN1,JAK3,IFNK,FGL2,SLC15A4,SHB,RC3H1,STAT5A,CD244,ICAM1,C17ORF99,NOTCH2,ZBTB7B,RAB27A,SLC11A1,FCGR3A,F2RL1,IL10,IL4R,BRD2,CLEC4D,CCR6,IRF4,GPR183,IL23A,CD80,GATA3,ITFG2,RORA,RORC,CD40,KMT2A,CD28,CD19,EXO1,OPA1,POU2AF1
GO:BP	regulation of monoatomic ion transport	GO:0043269	FALSE	2.89E-30	29.539	452	3059	85	78724	CYBA,TRPC6,LILRA5,CTNNB1,WWP2,TESC,DIAPH1,CD63,CRACR2B,HOMER3,CTSS,SLC9A1,OPRD1,UBASH3B,ASPH,TSPO,AKAP5,GNAI2,GNB2,PDGFRB,PRKACA,SLC31A2,CORO1A,G6PD,SLC8A1,ATP1B3,BAK1,GPR35,PTPN6,P2RX1,KCNAB2,KCNJ15,KCNJ2,SLC30A1,CXCR4,TCIRG1,KCNE1,INPP5K,MMP9,RRAD,GSTO1,LYN,KCNE3,PDPK1,TMSB4X,CALM3,OXSR1,AHCYL1,PXK,ORAI1,SEMG1,FKBP1A,PIK3CG,NOS1,FGF13,CCR2,ANO6,EPHB2,FXYD6,CALM2,B2M,STAC3,FMR1,PML,BAX,CAMK2G,CD…
GO:BP	embryonic morphogenesis	GO:0048598	FALSE	4.23E-30	29.374	620	3059	100	78724	CTNNB1,DEAF1,MAPK1,LAMB3,APOA1,MAFB,GRB2,CREBBP,MMP8,PRKACA,SPINT1,NF2,HLX,SMAD1,FOLR1,STK4,PSEN1,STK3,INHBA,PAF1,TRIM28,MYADM,CTR9,TRAF6,HIRA,APAF1,SLC39A1,FZD2,SUFU,WNT6,TMEM107,HIF1A,ITGB2,MYO7A,VASP,DNAJB6,MAP2K1,MMP9,HIPK1,DUSP1,NDST1,TGFBR1,SFRP1,PAX6,ATOH8,MAPK7,APLN,CHST11,MIB1,INSIG2,PLXNB2,OTX1,NOTCH2,ZNF281,EPHB2,TCAP,SPINT2,ANKRD24,TAF10,BAX,IL10,RTF1,KDM6B,BCL2L11,RIC8A,OSR2,HOXA9,BR…
GO:BP	regulation of supramolecular fiber organization	GO:1902903	FALSE	4.36E-30	29.3607	383	3059	78	78724	TWF2,F11R,CAPG,ARAP1,ARPC2,FKBP4,CDC42EP4,FLII,HCLS1,RAC1,MAP1S,SLC9A1,PRKCD,APOA1,WAS,GBA2,CLIP1,GRB2,PYCARD,PXN,SVIL,ARL2,HAUS4,APP,CORO1A,PREX1,NF2,ARF1,CYFIP1,SPAST,PSEN1,ACTG1,RB1,CHADL,BRK1,CDK5R1,GMFG,MYADM,WDR1,MEGF9,VASP,FES,SPTB,PICK1,AKAP13,INPP5K,SSH1,MAPRE1,EFEMP2,TGFBR1,SFRP1,DAPK3,GSN,HCK,HSPA1A,ARHGEF5,PPFIA1,CAPZB,CORO1B,ARPIN,FGF13,F2RL1,COTL1,HSPA1B,ARPC3,PAK1,S100A10,PDE4DIP,S…
GO:BP	protein localization to cell periphery	GO:1990778	FALSE	6.00E-30	29.2221	365	3059	76	78724	F11R,FLOT2,TESC,RAB7A,VPS26B,RAB13,CLSTN1,FRMD8,RHOG,RAB10,AKAP5,ATP6AP1,EHD4,KIF13A,ATP1B3,ACSL3,PRAM1,CLN3,ZDHHC3,MYADM,GBP1,TRAF6,CSK,TMEM88,EHD1,VPS35,BSG,GABARAP,NUBP1,PPP2R5A,VAMP8,TMBIM1,INPP5K,AP2M1,SORL1,PDPK1,LIN7A,TTC7B,ZDHHC5,NETO2,TTC7A,TSPAN33,PPFIA1,SCARB2,SQSTM1,LIN7B,LYPD1,FGF13,LRP1,MYO5A,EPHB2,ZDHHC2,STAC3,PICALM,TSPAN14,GAS6,EPB41L3,VTI1B,PPP1R9B,S100A10,ARFRP1,VAMP5,KRT18,KCN…
GO:BP	leukocyte chemotaxis	GO:0030595	FALSE	6.01E-30	29.2212	238	3059	62	78724	RIN3,S100A12,IL17RA,MAPK1,HSD3B7,RAC1,CSF1R,S100A8,VAV1,SYK,FCER1G,MOSPD2,CCL23,C3AR1,IL1B,S100A9,CORO1A,PREX1,PADI2,CXCL14,VAV3,RAC2,C5AR1,MPP1,CXCL1,CMKLR1,NEDD9,BSG,ITGB2,CXCR4,TNFSF14,LYN,DUSP1,TIRAP,ALOX5,OXSR1,ARHGEF5,PIK3CG,ADAM17,PPIB,CCR2,ANO6,DAPK2,VEGFA,ADAM8,CXCL16,F2RL1,IL10,CALR,PLA2G7,GAS6,NINJ1,IL34,CCR6,GPR183,IL23A,DPP4,S1PR1,PERP,SLAMF1,EDN2,SLIT2
GO:BP	receptor-mediated endocytosis	GO:0006898	FALSE	6.77E-30	29.1691	264	3059	65	78724	RIN3,NRG1,ARRB1,RNASEK,CD63,RAC1,CEACAM1,SYK,ITSN1,FCER1G,ANKRD13D,GRB2,AP2S1,CLTA,IGF2R,ARF1,PDLIM7,FOLR1,LRPAP1,CLN3,CAP1,ARHGAP27,CACNG8,ASGR1,LILRB4,EFNB2,GPR107,ITGB2,RAB21,PICK1,AP2M1,SORL1,CACNG4,CBL,HNRNPK,APLN,SAG,ANXA2,LYVE1,RAB5A,SCARB2,ITGAM,DGKD,LRP1,CD14,SELE,MDM2,B2M,FMR1,VEGFA,CXCL16,PICALM,AP2A1,SDCBP,NCDN,VLDLR,RNF220,SYT17,CAV1,DPP4,BICD1,DRD3,LRP2,CLEC4M,AHI1
GO:BP	regulation of anatomical structure size	GO:0090066	FALSE	6.98E-30	29.1561	500	3059	89	78724	RIN3,SEMA4D,TWF2,PTEN,CAPG,ARPC2,CDC42EP4,FLII,HCLS1,HRH2,GLA,RAC1,DIP2B,PRKCD,WAS,GBA2,VAV1,KIAA0319,GRB2,IST1,PYCARD,TBXAS1,SVIL,KLF2,CORO1A,PREX1,SLC12A9,SLC8A1,CYFIP1,SCPEP1,VAV3,WDTC1,CLN3,P2RX1,BRK1,RTN4,MYADM,DOCK4,WDR1,RAP1GAP2,HSP90AA1,MSN,MEGF9,PLOD3,SLC12A6,CBS,VASP,RAB21,SPTB,AP2M1,SSH1,GSN,HCK,OXSR1,RAB5A,CAPZB,BLOC1S1,NOS1,FSTL4,FGF13,PEX11G,E2F4,ANO6,P2RY2,ULK1,PAFAH1B1,VEGFA,SEMA3…
GO:BP	blood coagulation	GO:0007596	FALSE	8.47E-30	29.072	231	3059	61	78724	EMILIN2,F11R,GLA,F12,PRKCD,ITPK1,WAS,CEACAM1,VAV1,HPSE,SYK,FCER1G,UBASH3B,FERMT3,JAK2,SERPINA1,DGKG,PLAUR,PLSCR1,STXBP3,HPS6,ACTG1,ANXA5,VAV3,PTPN6,GGCX,P2RX1,ENTPD1,HSPB1,PRDX2,MAPK14,TFPI,F5,MMRN1,PLA2G4A,LYN,PAPSS2,CD59,ANXA2,PIK3CG,DGKD,ST3GAL4,PROC,SERPING1,RAB27A,ANO6,EPHB2,GNA13,MYL12A,F2RL1,C1QTNF1,GAS6,BLOC1S3,SERPINB2,CSRP1,PLAU,CAV1,F2RL2,LMAN1,CD40,AXL
GO:BP	tissue morphogenesis	GO:0048729	FALSE	9.10E-30	29.0409	614	3059	99	78724	PTEN,CTNNB1,NRG1,DEAF1,VDR,BMP2,TOR1A,CSF1R,CEACAM1,GRB2,CD151,PRKD2,RAB10,CCM2,CTNNBIP1,PRKACA,SPINT1,EGLN1,NF2,SMAD1,FOLR1,STK4,PSEN1,ACTG1,STK3,INHBA,TRIM28,TRAF6,APAF1,WDR1,RHOB,MSN,EFNB2,FZD2,BSG,SUFU,WNT6,PLOD3,PKD1,HIF1A,CXCR4,VASP,TGM3,EFEMP2,MYL3,TGFBR1,SFRP1,CD44,MIB1,FKBP1A,JAG1,ADAM17,PLXNB2,ACVRL1,NOTCH2,CTSH,MYL11,TCAP,MDM2,GNA13,SPINT2,PAFAH1B1,PML,VEGFA,TAF10,IL10,KDM6B,PPP1CA,PAK…
GO:BP	negative regulation of protein modification process	GO:0031400	FALSE	1.17E-29	28.9315	349	3059	74	78724	SEMA4D,PTEN,CTNNB1,MVP,ARRB1,PRKCD,BMP2,CEACAM1,YWHAG,PARP10,HMG20B,PYCARD,TSPO,IL1B,PPP1R15B,LRRK1,NF2,G6PD,SLC8A1,BAK1,PSEN1,CEP63,DTX3L,RB1,IRAK3,PTPN6,RGS14,CTDSP1,HSPB1,DUSP3,LILRB4,BEX1,DUSP6,GPS2,CD300A,INPP5K,DBI,LYN,PDPK1,NLRP12,DUSP1,TARDBP,CRKL,SFRP1,PAX6,CALM3,HSPA1A,GSTP1,TERF2IP,SNX6,U2AF2,SQSTM1,TTC36,TSG101,NCOA7,EPHB2,CALM2,TRIB1,BAX,PARD6A,HSPA1B,CTDSP2,ADAR,DNAJA1,LRRK2,GADD45A…
GO:BP	heart development	GO:0007507	FALSE	1.30E-29	28.8875	605	3059	98	78724	MAP2K2,GSK3A,PTEN,AP1B1,TNFRSF1B,CTNNB1,NRG1,JMJD6,MAPK1,SLC9A1,SMARCD3,BMP2,NCOA6,PCSK5,CCM2,MEF2A,PDGFRB,PDLIM2,EGLN1,PDLIM5,SHC1,G6PD,SLC8A1,PDLIM7,SMAD1,FOLR1,STK4,PSEN1,NDUFV2,RB1,STK3,INHBA,RTN4,MAPK14,EFNB2,FZD2,SUFU,PPARG,MBD1,PKD1,HIF1A,DUSP6,FES,MAP2K1,AKAP13,MYL3,CRKL,NDST1,TGFBR1,EPOR,ZMPSTE24,TEK,GNG5,APLN,CTDP1,MIB1,ZMIZ1,FKBP1A,JAG1,IGF1R,ACVRL1,NOTCH2,MAP2K3,SH3PXD2B,TCAP,MDM2,VEG…
GO:BP	axonogenesis	GO:0007409	FALSE	1.82E-29	28.7407	463	3059	85	78724	MAP2K2,SEMA4D,TWF2,B4GALT5,PTEN,MARK2,GLA,GFRA3,EFNA4,RAC1,MAP1S,DIP2B,SEMA4A,CSF1R,KIAA0319,RHOG,LYPLA2,IST1,RAB10,NUMBL,FBXO45,SIPA1L1,APP,CYFIP1,KIF13B,SPAST,PSEN1,ACTG1,RTN4,CDK5R1,S100A6,EFNB2,B3GNT2,PLXNA2,VASP,RAB21,MAP2K1,EFNA3,PAX6,PITPNA,TIAM2,APLP2,NCAM1,CNP,ADAM17,PLXNB2,FSTL4,IGF1R,FGF13,NOTCH2,EPHB2,ULK1,SPG21,BMPR1B,PAFAH1B1,VEGFA,SEMA3A,NTNG2,PICALM,RPS6KA5,PAK1,UNC5C,BOC,UST,ARHG…
GO:BP	B cell activation	GO:0042113	FALSE	1.88E-29	28.7257	286	3059	67	78724	LAPTM5,TYROBP,NFAM1,TICAM1,AKIRIN2,BCL6,SASH3,INPP5D,NDFIP1,FOSL2,PRKCD,SYK,HDAC5,BTK,SPI1,LGALS1,BATF,MSH6,TBC1D10C,TNFSF12,BAK1,JAK3,VAV3,IRS2,PTPN6,INHBA,IFNK,SLC15A4,SHB,RC3H1,TCIRG1,GPS2,CD300A,LYN,TIRAP,SFRP1,LAT2,HDAC4,BST2,ADAM17,STAT5B,KLF6,C17ORF99,NOTCH2,EPHB2,SH3KBP1,BAX,IL10,CCR6,CTLA4,PAX5,GPR183,FCRL5,MS4A1,ITFG2,LAX1,IL7R,CD40,RABL3,CD28,ICOSLG,CD27,CD19,CD22,EXO1,POU2AF1,CD79A
GO:BP	phospholipid metabolic process	GO:0006644	FALSE	2.33E-29	28.6327	392	3059	78	78724	AGPAT2,PTEN,AGPAT3,SAMD8,INPP5D,ITPKC,SMPDL3A,PRKCD,APOA1,CDIPT,PTDSS2,OSBPL5,MTMR3,PRDX6,DGKG,SMPD3,PLSCR1,NR1H3,PIK3R5,ACSL3,HADHA,FIG4,MBOAT7,GPAA1,CLN3,PIGO,PLA2G15,AGPAT1,HEXB,ABHD3,IP6K1,PITPNM1,PIGS,BMX,PLBD1,SYNJ1,CDS2,LPCAT2,INPP5K,SLC44A1,DBI,SERAC1,PLA2G4A,MBOAT2,PROCA1,IP6K2,IDH1,TTC7B,IPMK,TMEM86B,TTC7A,MFSD2A,PTDSS1,PIK3CG,DGKD,INPP5A,LPCAT3,LPGAT1,PLD1,SGMS2,PAFAH1B1,SRD5A3,PITPNM2…
GO:BP	epithelial cell differentiation	GO:0030855	FALSE	4.43E-29	28.3541	746	3059	109	78724	MAFG,CES1,CTSB,GSK3A,CEBPA,F11R,TST,SIPA1,CTNNB1,NRG1,EXTL3,RAB13,KLF5,FOSL2,VDR,BMP2,CEACAM1,HPSE,LIPA,MAFB,RAB10,TOLLIP,CCM2,IL1B,TDRD7,CEBPB,KLF2,TJP2,SHARPIN,NF2,HSD17B4,PSAP,STK4,ANXA4,CEP63,CBR1,ACADVL,SIDT2,MYADM,MYD88,ASAH1,FZR1,MSN,FZD2,PPARG,FSTL1,PLOD3,HIF1A,CSTA,MYO7A,CXCR4,TGM3,MAP2K1,HAPLN2,KCNE1,EPAS1,MMP9,VIM,PDPK1,PAX6,ATOH8,THRA,JAG1,ZFP36,ICAM1,STAT5B,ACVRL1,TSG101,E2F4,NOTCH2,…
GO:BP	positive regulation of immune effector process	GO:0002699	FALSE	5.56E-29	28.2546	264	3059	64	78724	LAPTM5,TYROBP,TICAM1,FCN1,NLRP3,SASH3,SECTM1,TLR7,LAMP1,YWHAG,VAV1,SYK,MAPKAPK2,CFP,PYCARD,FGR,BTK,IL1B,PANX1,SPI1,PVR,BRD4,HLA-F,HLA-E,TNFSF12,HLX,PTPN6,RTN4,TRAF6,MYD88,TNFRSF14,HLA-A,ITGB2,SHB,VAMP8,GAB2,CD300A,RSAD2,CARD9,CD244,ITGAM,STAT5B,C17ORF99,SCIMP,CCR2,EPHB2,ARG1,B2M,F2RL1,IL10,LACC1,DHX58,FADD,IL4R,BRD2,SLC7A5,IL23A,CD80,LTA,GATA3,CD40,CD28,SLAMF1,OPA1
GO:BP	negative regulation of catalytic activity	GO:0043086	FALSE	9.05E-29	28.0432	293	3059	67	78724	GSK3A,PTEN,MVP,GLA,PRKCD,BMP2,TIMP2,CEACAM1,YWHAG,HP,PYCARD,SORT1,AKAP5,GNAI2,IL1B,SERPINB8,ARL2,EGLN1,SLC8A1,PSEN1,PARP9,GMIP,DTX3L,RB1,IRS2,IRAK3,RGS14,HSPB1,CST7,DUSP3,LILRB4,SERPINB6,TMLHE,TFPI,PPP1R12A,CSTA,TMBIM1,GAPDH,PTX3,CD300A,INPP5K,LYN,PDPK1,DUSP1,GSTP1,SNX6,ZFP36,NOS1,BANF1,TSG101,MIDN,LRP1,CCR2,EPHB2,TRIB1,ADAR,DNAJA1,LRRK2,GADD45A,RRP1B,DNAJA3,SH3BP4,CAV1,GPSM1,FICD,TRIB2,ADARB1
GO:BP	regulation of protein transport	GO:0051223	FALSE	1.08E-28	27.9671	442	3059	82	78724	OS9,WWP2,RPH3AL,OAZ2,LCP1,HCLS1,NDFIP1,MAP4K4,PRKCD,C2CD2L,ASPH,JAK2,HMGCR,AKAP5,IL1B,PTPN23,PRKACA,SLC25A22,TLR2,TMEM30A,NR1H3,OAZ1,ACSL3,PSEN1,ANG,CLN3,IRS2,SIDT2,TRIM28,CSK,MAPK14,RANGAP1,VPS35,HSP90AA1,BSG,SUFU,GPR27,PPARG,HIF1A,TCIRG1,RAN,CHRM3,PICK1,SORL1,TARDBP,SFRP1,ALOX5,RSAD2,FAM3D,ARHGEF5,ORAI1,DMAP1,SNX12,TSG101,MIDN,NADK,TM9SF4,ZDHHC2,MDM2,PIM3,CDK16,ADAM8,F2RL1,PARD6A,DNAJA1,GAS6,FR…
GO:BP	negative regulation of phosphate metabolic process	GO:0045936	FALSE	1.34E-28	27.8742	304	3059	68	78724	SEMA4D,GSK3A,PTEN,MVP,CDKN2C,PRKCD,BMP2,CEACAM1,YWHAG,PYCARD,TSPO,IL1B,PRKACA,PPP1R15B,LRRK1,NF2,SLC8A1,BAK1,PSEN1,RB1,IRS2,IRAK3,PTPN6,RGS14,INHBA,CTDSP1,HSPB1,DUSP3,LILRB4,FBP1,DUSP6,CD300A,INPP5K,CDA,LYN,PDPK1,NLRP12,DUSP1,TARDBP,CRKL,SFRP1,PAX6,CALM3,HDAC4,GSTP1,TERF2IP,SNX6,TTC36,TSG101,MIDN,EPHB2,CALM2,TRIB1,BAX,PARD6A,CTDSP2,ADAR,DNAJA1,IQGAP1,LRRK2,GADD45A,CDKN2D,DNAJA3,PTPN13,CAV1,TRIB2,…
GO:BP	negative regulation of phosphorus metabolic process	GO:0010563	FALSE	1.34E-28	27.8742	304	3059	68	78724	SEMA4D,GSK3A,PTEN,MVP,CDKN2C,PRKCD,BMP2,CEACAM1,YWHAG,PYCARD,TSPO,IL1B,PRKACA,PPP1R15B,LRRK1,NF2,SLC8A1,BAK1,PSEN1,RB1,IRS2,IRAK3,PTPN6,RGS14,INHBA,CTDSP1,HSPB1,DUSP3,LILRB4,FBP1,DUSP6,CD300A,INPP5K,CDA,LYN,PDPK1,NLRP12,DUSP1,TARDBP,CRKL,SFRP1,PAX6,CALM3,HDAC4,GSTP1,TERF2IP,SNX6,TTC36,TSG101,MIDN,EPHB2,CALM2,TRIB1,BAX,PARD6A,CTDSP2,ADAR,DNAJA1,IQGAP1,LRRK2,GADD45A,CDKN2D,DNAJA3,PTPN13,CAV1,TRIB2,…
GO:BP	organic acid biosynthetic process	GO:0016053	FALSE	1.40E-28	27.8536	323	3059	70	78724	CES1,NLRC4,CASP1,MGST2,STAR,HSD3B7,MGST3,AKR1A1,CEACAM1,SYK,PYCARD,TBXAS1,IL1B,DEGS1,SLC27A2,ALOXE3,PCBD1,ACOT8,NR1H3,ACSBG1,QKI,ACSS2,WDTC1,CBR1,CLN3,ACADVL,ERLIN1,EIF6,OSBPL1A,SDSL,ABHD3,BRCA1,CSAD,NAIP,PLOD3,DPYD,PDK4,ABHD2,ELOVL3,PLOD2,ALDH1A1,CBS,UBR4,MGLL,PLA2G4A,ALOX5,GGT1,GSTP1,SUCLA2,NANS,INSIG2,CYP2C9,ELOVL1,LPGAT1,HSD17B10,PSPH,OSBPL2,FA2H,GSTM1,ELOVL4,GSTM4,GSTM2,SLC27A5,CYP2D6,ALDH8A…
GO:BP	regulation of hormone levels	GO:0010817	FALSE	2.08E-28	27.6818	556	3059	92	78724	CTSB,RETN,RPH3AL,MAP4K4,BMP2,C2CD2L,DHRS4,TSPO,PCSK5,JAK2,BTK,IL1B,PRKACA,HSD17B11,SLC25A22,SMPD3,DHRS7,HSD17B4,STXBP3,SCPEP1,MEP1A,IRS2,PNPLA2,INHBA,SIDT2,CEL,SRD5A1,DGAT1,P4HB,GPR27,PPARG,HIF1A,TCIRG1,ALDH1A1,VAMP8,CHRM3,PICK1,ECE2,SGPL1,LYN,TARDBP,SFRP1,STARD3,ALOX5,ZMPSTE24,PAPSS2,AFP,FAM3D,ORAI1,CYP2C9,STAT5B,IGF1R,DHCR7,MIDN,DGAT2,NADK,PIM3,CDK16,HSD17B10,SRD5A3,CAMK2G,F2RL1,HSD17B3,C1QTNF1…
GO:BP	production of molecular mediator of immune response	GO:0002440	FALSE	2.38E-28	27.6227	227	3059	59	78724	LAPTM5,TNFRSF1B,TICAM1,BCL6,NLRP3,SASH3,NDFIP1,SECTM1,APOA1,TLR7,SYK,MAPKAPK2,PYCARD,BTK,IL1B,PANX1,BATF,MSH6,HLA-F,HLA-E,TNFSF12,JAK3,CLC,IRAK3,RTN4,TRAF6,SLC15A4,MYD88,TNFRSF14,LILRB4,HLA-A,NLRX1,CTNNBL1,RSAD2,CARD9,POLB,BST2,ELANE,CD244,C17ORF99,SCIMP,CCR2,EPHB2,ARG1,B2M,F2RL1,IL10,LACC1,XRCC4,IL4R,SLC7A5,CCR6,GATA3,CD40,CD28,CD22,SLAMF1,EXO1,AXL
[truncated: 3,286 more rows]
